# Supplementary material
Source: Research Square preprint supplement (doi:10.21203/rs.3.rs-9106698/v1)
Supplement: Supplementary file 1 [file 08af068509aa7c93e4bb9b26.xlsx]

## Sheet: report.unique_genes_matrix
Genes	compound_01_a	compound_01_b	compound_02_a	compound_02_b_	compound_03_a_	compound_03_b_	compound_04_a_	compound_04_b_	compound_05_a_	compound_05_b_	compound_06_a_	compound_06_b_	compound_07_a_	compound_07_b_	compound_08_a_	compound_08_b_	compound_09_a_	compound_09_b_	compound_10_a_	compound_10_b_	compound_11_a_	compound_11_b_	compound_12_a_	compound_12_b_	compound_13_a_	compound_13_b_	compound_14_a_	compound_14_b_	compound_15_a_	compound_15_b_	compound_16_a_	compound_16_b_	compound_17_a_	compound_17_b_	compound_18_a_	compound_18_b_	compound_19_a_	compound_19_b_	compound_20_a_	compound_20_b_	compound_21_a_	compound_21_b_	compound_22_a_	compound_22_b_	compound_23_a_	compound_23_b_	compound_24_a_	compound_24_b_	compound_25_a_
A2M	339.696		272.118																							3629.98			1637.77							148.425
A2ML1						120.29		558.038																		12037				581.204						3391.84
AACS	2812.42	2546.01	2726	2440.78	2290.52	2379.14	2790.95	2667.75	2291.88	2429.88	2924.01	2206.01	2955.9	2910.35	2751.77	2311.45	2458.3	2695.28	2374.33	2657.67	2721.29	2333.48	2612.29	2344.35	2784.51	3392.18	3179.21	2831.83	2996.56	2093.75	2877.26	2407.31	2378.96	2643.88	2430.65	1862.31	2930.97	2419.21	2714.54	1965.59	2481.27	2442.67	2628.91	3028.35	2413.34	2262.05	2588.62	1336.55	2379.07
AAGAB	1178.2	1563.31	1203.28	1607.13	1421.2	943.142	1187.88	765.186	1355.31	1194.88	757.457		601.723	852.882	1244.73	757.42	1158.47	775.054	1123.81	1310.14		1155.5		730.579	1864.95	559.657	1108.5	812.562	1868.05		1154.4	1372.66	1032.56	884.326	1317.94	628.123	1107.55	861.636	843.799	1033.06	1337.01	949.19	829.556	1123.85	1258.18	959.77	1086.07		1210.18
AAMP	802.415	962.102	717.176	756.242	433.221	978.587	398.186	988.171	504.147	824.087	1294.22	1020.71	926.578	756.207	488.389	1015.54	1006.62	817.955		957.269	486.082	1105.93	510.51	988.227	754.575		177.922		975.926		873.049	544.527	723.391	892.724	949.179			548.585	1336.12	1018.75	1100.83	707.479	687.072	876.011	770.741	950.759	537.37		667.654
AAR2	262.391	280.551	494.874	542.214						391.698	885.792	715.829	1001.98	306.268	188.728	382.917	918.682	401.185		176.182		677.244			559.962				1241.23	358.738	93.7751	408.852	450.855	491.872	630.183			445.572	421.789	156.133	521.566	423.592	425.19	534.365	634.5		565.398
AARS1	10617.9	11027.3	9169.2	9487.86	11373.8	10687.7	10180	10288.8	10652.4	11430.2	10645.7	10828.1	12137.3	11288.7	12236.1	11026	12410.3	13892.4	11243.3	12360.2	12440.4	12659.5	11099.4	11809.9	10746.3	5119.12	10210	12972.2	11269.4	4262.06	11983.9	9562.66	12056.9	11290.2	10147.2	4597.73	10752.5	11961.4	10729.4	11149	9916.62	10064.1	9660.25	12185.6	11223.9	5358.2	11405.1	4171.95	12046.2
AARS2	1293.95	1028.59	1196.08	1053.72	1220.04	1354.62	1015.09	1093.22	1164.34	1016.39	935.471	1292.85	1298.21	1162.72	1342.31	776.231	984.769	1018.86	836.022	1417.23	1171.27	1046.18	1372.55	980.111	924.134	1220.38	1016.87	1249.72	1247.71		1160.89	843.056	871.808	976.717	1224.54		1006.2	1352.79	1022.54	879.569	1009.89	1000.94	1131.93	874.37	1124.69		892.571	909.114	1200.36
AARSD1	1799.3	1896.07	1472.69	1853.87	1764.3	1736.53	1848.55	2953.55	1929.25	2119.77	1985.5	2456.19	1940.33	1953.31	2524.84	1785.57	2184.12	1913.83	1714.19	1906.02	2336.16	1855.89	2309.36	2309.31	2293.29	2027.56	1986.58	1917.18	2604.5	1763.39	1411.64	2093.65	2082.76	1968.97	2012.66	1892.83	2227.8	2105.88	2926.28	2745.54	1777.86	2169.43	2026.03	2173.46	1911.56	2801.43	1696.26	1991.97	2332.43
AASDHPPT	872.597	1119.11	594.24	914.717		954.392	735.773	925.304	979.53	725.942	1264.03	1299.39	929.524	1186.28	1171.47	1278.94	877.627	1587.42	466.548	436.138		1392.75	828.365	650.605	1141.73		1537.35	791.491	553.085		1436.39	756.34	1015.24	977.751	1269.54		1382.15	1132.68	676.961	1060.52	1260.6		1049.29	889.304	905.38	846.434	515.536	1040.06
ABAT				134.723	404.223	233.133				231.247	314.297	286.082			317.438	205.304	305.171	149.487			469.791		103.286					76.0682	206.639		281.271		331.633	155.519						179.923	313.657		149.069	209.711	450.852		153.469
ABCB6	2183.02	2142.89	2382.88	2084.25	2461.48	2222.15	2105.64	2129.6	2267.43	2033.63	2617.76	2417.79	1701.87	1839.38	2228.35	2004.55	2360.32	1655.9	2025.52	2356.2	1113.92	1865.74	2047.6	1984.96	1861.41	2894.28	2583.79	1817.5	1769.88	2367.18	2083.78	1667.26	1993.06	2173.07	2073.68	2151.31	2072.01	1708.82	1831.1	1669.83	2061.5	2074.46	2570.16	2197.07	2055.81	2066.19	2303.7	1248.63	1744.48
ABCD1	1187.39	856.909	1124.97	1045.11	1355.57	1116.31	1321	1051.4	751.611	1148.68	900.348	1263.42	1013.42	448.582	1037.39	1119.99	523.43	748.32	1230.44	845.256	1206.09	1009.96	1042.68	698.309	894.874	480.605	1403.7	777.135	1045.13	869.432	1284.04	1095.23	1240.94	785.288	1229.6	371.2	1205.3	966.063	936.452	1122.17	826.306	683.304	935.799	853.523	941.369	603.702	829.26	594.701	708.494
ABCD3	2380.82	2526.25	1980.18	2129.06	2373.27	1659.51	1384.18	2560.77	2829.1	2314.02	2247.8	2159.57	2258.43	2501.76	2155.21	2307.74	2330.48	2169.06	1827.4	2616.41	1962.36	2150.91	2412.29	2187.44	1683.01	5041.21	1990.97	1786.92	2591.27	2438.65	2261.24	2484.54	2703.77	2815.87	2539.9	3533.94	2597.81	2189.64	3107.74	2129.14	2165.8	2312.82	2132.44	2109.68	2158.85	1987.22	2338.57	3549.89	1832.9
ABCE1	12392.9	10071.5	11410.4	10638.6	10852.9	11112.8	11305.3	9761.82	11245.8	10150.4	9871.71	8549.07	11975.3	9998.06	11230.3	9074.54	11620.4	10420.4	11223.8	8937.55	10545.2	8839.06	11599.6	9608.37	11491.4	6981.09	10197.9	10318.5	11064.3	7008.53	11090	9938.56	10108	10815.8	9416.65	7312.32	11220.5	8746.08	11170.5	9583.09	10979.6	10484.9	10722.6	12244.4	12253.7	7856.83	11957.6	7255.95	10251.3
ABCF1	9731.36	10790.9	10915.8	9888.7	10188.9	11282.9	10264.3	10035.2	9967.64	9917.64	11353.3	9944.96	10418.5	10225.9	9755.62	10435.9	9942.76	10696.7	10132.5	9813.26	10363.1	9198.09	11950.9	10562.4	9905.43	7016.75	9655.57	10718.7	10401.4	8613.95	10771.5	9007.62	11259.3	11456	11223.2	8180.94	11068.3	11120	10909.3	10927	10266.7	10481.6	10986.2	10178.7	11033.4	9826.03	11873.3	9403.1	9997.25
ABCF2	7198.87	6833.17	6865.23	7110.68	6605.71	6653.74	6777.47	6360.91	5904.28	5638.48	6267.63	5813.06	5551.63	5363.7	5654.27	6436.56	6216.55	6503.54	6521.33	7023.8	5620.95	5941.6	7952.56	6214.85	5971.89	5066.28	6401.34	6776.04	6420.76	5434.63	6627.06	6407.41	5971.82	7401.57	6124.22	6014.71	6687.13	6394.41	7393	6587.52	6058.8	6059.76	6420.19	5606.65	6004.21	6020.42	5974.7	5501.83	6673.26
ABCF3	7062.61	7264.46	7712.61	7767.29	6950.9	7151.8	8092.88	7204.91	7343.15	6849.46	7477.03	7211.27	6875.51	7214.67	6835.2	8810.55	6615.52	6228.86	7705.83	6753.23	5945.25	7102.89	6577.57	7511.2	7255.42	6905.19	7080.69	7295.13	7126.36	7848.19	6026.44	7538.06	7586.26	6979	6660.12	5625.15	7357.32	7156.7	6704.34	7063.94	7165.61	8058.36	7186.02	6517.18	7443.09	7770.12	7030.04	7543.8	6842.91
ABHD10	2440.47	2294.63	2677.56	2253.05	2488.66	2391.98	2507.44	2955.1	3397.02	2338.24	3028.52	1778.08	2220.66	1900.56	2066.48	2769.28	1763.83	2151.43	2246.74	2614.83	1903.13	2698.22	2380.88	2134.68	2499.5	2709.64	3369.53	2182.28	2710.97		2394.05	2559.01	1857.16	2170.01	1385.06	1628.6	2283.67	2279.31	1939.46	2514.14	2596.94	2045.71	3141.8	2698.7	3131.16	2526.65	2507.57	1610.29	2579.99
ABHD11	2255.72	1738.68	2194.55	2179.26	2496.68	2098.69	2167.03	2376.49	2020.26	2002.04	2103.5	1932.94	2174.19	2305.51	1985.06	2249.93	2403.69	1975.53	2162.37	2270.28	2189.78	2390.2	2292.98	1867.3	2066.62	1564.69	2087.44	2061.15	2052.19	1889.86	2535.29	2361.89	1783.08	1870.67	2732.27	1830.27	2007.17	2153.91	1876.57	2215.22	2015.13	1872.65	1680.69	2296.87	1636.25	1237.19	2246.87	1519.78	2190.86
ABHD14B	1372.94	2291.93	1519.28	1492.24	1673.42	1007.13	1213.94	1265.59	1661.56	1878.41	2073.21	1898.42	1366.47	1965.88	1714.73	1938.2	1819.53	1579.86	1772.52	2026.66	1410.59	1681.94	2183.06	2082.89	1384.07	2659.43	1550.36	1705.3	1272.54	1772.45	1600.42	1520.51	1577.24	1825.61	1931.68	1972.82	1037.3	1980.19	1497.33	2299.14	1515.35	2141.14	1695.86	1740.89	829.006	1801.8	1640.26	1407.03	1319.92
ABHD16A	1958.17	2060.63	1999.4	1797.58	1921.27	1852.39	2147.79	2235.22	1889.07	1862.19	2029.52	2187.73	1774.05	2052.63	1604.13	1893.28	1365.98	1623.97	1707.51	1811.89	1681.3	1665.08	1900.71	1834.79	2025.75	1770.58	2355.84	1734.3	1668.95	1689.59	1846.03	1683.67	2136.03	1520.31	1652.37	2021.95	1865.82	1617.73	2141.68	1723.95	2041.44	2158.68	1911.19	1193.07	1691.31	1562.94	1651.43	1607.77	1715.13
ABI1	2396.55	1099	2073.44		2246.56	2035.54	2594.46	2174.52	2346.17	1686.96		1861.43	2033.35	1455.82	2042.65	2062.15	1856.41	1558.15	1521.46	1714.04	1790.92	2027.6	2102.49	2026.46	1568.46	6241.02	2083.28	1524.75	2375.22		2014.19		2330.82	1792.87			1740.58	2125.97	1829	2286.27	1768.8	2001.85	1237.19	1862.26			2325.7		2169.97
ABR	1518.16	1461.04	1598.66	1462.38	1457.38	1560.58	1493.83	1299.78	1910.68	1761.93	1550.35	1432.84	1139.61	1469.37	1165.19	1518.56	1694.19	1458.21	1812.9	1395.87	1286.13	1390.79	1472.44	1708.26	1605.14	2084.61	1681.33	1469.36	1782.95	1532.26	1435.8	1579.58	1390.19	2651.23	1546.03	1655.27	1275.31	1498.43	1480.61	1153.79	1877.86	1511.44	1465.37	1478	1486.59	1805.54	1663.83	1484.63	1723.2
ABRAXAS2	1374.19	1252.87	1604.1	1640	1524.85	1528.75	1868.71	1877.32	1774.03	1542.6	1639.11	2125.22	1384.89	1566.89	1857.18	1550.06	1569.95	1062.22	1809.5	1184.23	1175.69	1565.81	1267.12	1764.81	1802.71	2170.59	2409.49	1683.81	1678.36	1787.86	2009	2366.09	1779.07	1861.54	1910.45	2283.64	1672.87	1606.47	1198.68	1092.83	2179.98	1860.22	1886.91	1819.84	1332.21	2378.79	1662	1724.06	1611.42
ACAA1	842.844	866.052	906.557	927.846	817.882	770.241	858.569	692.301	704.192	679.807	520.398	1063.3	944.935	1076.28	774.149	791.594	585.954	872.028	744.866	862.375	763.133	990.638	1163.37	1139.42	927.369	1824.57	1029.34	1059.84	838.942		959.179	696.7	878.997	617.517	650.76		1056.57	786.757	711.818	853.498	835.006	915.431	760.825	618.34	600.939		789.231	566.665	603.093
ACAA2	8390.14	10932.6	7194.17	10035.1	8522.66	10454.7	8064.43	10823.9	11297.2	10511.3	11046.3	10189.4	10628.6	10908.1	10719.1	10959.6	11273.8	10864	10565.3	10928.7	9508.82	11009.7	10077.7	10942.8	9763.34	8830.39	8973.64	11141.3	9382.36	7119.35	9756.83	9524.41	9192.83	11727.1	9484.24	9146.79	9036.88	11769.7	8656.06	10785.1	10361.6	9913.15	9743.36	10624.3	10255	7720.62	10403.2	6996.36	10979.1
ACACA	3775.4	3463.75	3787.03	3677.15	3850.11	3282.76	3157.7	3440.27	3207	3504.87	3306.62	3604.71	3684.04	3216.49	3672.05	3430.25	3482.8	3247.99	3190.19	3134.27	3187.89	3640.19	3489.83	3359.74	2878.53	2880.78	3170.88	3494.41	3787.18	2527.53	3513.3	3257.75	3393.77	3513.17	3601.81	2607.72	3811.85	3488.59	3015.66	3502.85	3378.51	3254.81	3596.88	3549.33	3311.64	2729.78	3317.3	2356.66	3383.09
ACAD8	415.378		505.881	641.382	284.305	307.535	203.44	489.823	351.697	282.837				472.528	364.769	354.085	341.606	312.766					833.202			1157.36		553.061	295.625	326.091	428.252	179.208	426.555	453.374	234.131	647.708		386.33	192.189	335.329	186.209		349.811	227.828			339.359		203.771
ACAD9	2485.82	2982.83	2884.59	3316.62	2449.13	3111.84	2904.44	2519.72	2778.32	2952.65	2240.73	2337.62	2792.37	2758.46	2949.23	2527.51	2594.5	3362.96	2936.82	3215.65	2771.19	2355.76	2997.13	2570.12	2930.92	5647.7	3049.54	3316.85	3680.73		3405.2	2683.88	3299.09	3180.33	1923.52	1631.74	2867.11	3555.23	2659.81	3092.44	2883.22	2496.99	2995.58	3202.58	2893.88	1874.71	2636.87		3418.27
ACADM	3507.07	3910.56	3329.5	3596.56	3803.98	4070.57	3251.67	3816.36	4384.27	4775.67	4124.67	3193.42	3756.86	3419	3656.46	3813.36	4648.5	4488.07	3342.43	4007.36	3655.41	3771.05	3464.1	4287.37	4767.07	4186.24	3877.34	3495.73	4622.56	1092.43	4516.13	3277.64	4225.57	3451.34	3680.17	4203.73	4289.42	3250.08	5003.21	3831.51	3471.33	2621.34	3905.36	4063.7	5014.42	3359.12	3832.59	2323.68	3771.92
ACADSB	2233.02	2257.27	2200.47	1879.72	1876.13	1979.45	1538.67	2011.62	2198.81	1949.72	1595.62	1519	2291.12	1228.96	1491.14	1530.46	1547.84	2152.19	1496.74	2399.89	1482.37	1485.2	1243.85	1735.16	1766.25	1927.88	1870.08	2036.1	2413.31	1046.92	2233.06	2060.9	2088.25	1383.62	1294.9	1239.4	2094.54	1776.77	1592.46	1636.42	1915.83	1978.2	1669.2	2188.32	2156.29	1063.55	1438.46	2524.41	2031.14
ACADVL	1606.96	1440.22	753.315	1553.52	1524.42	1434.71	1266.17	1371.06	1735.49	1933.86	1913.83	1246.45	1695.63	1726.14	1546.92	2054.36	1720.63	1575.95	878.057	1658.63	1390.35	1810.7	1368.24	1413.4	1441.48	11231	1677.15	1782.68	1540.51		1778.4	1761.45	1567.88	1629.74	2027.78	3536.52	1854.26	1505.02	1570.67	1411.74	1117.48	1733.09	1640.21	1775.52	1966.86		1837.6	1216.7	1750.55
ACAP2	2415.5	2445.67	2621.68	2785.92	2260.85	2493.95	2346.24	2107.44	2587.03	2656.14	2244.15	2259	2704.82	2505.43	1934.47	2406.45	2163.02	2373.22	2932.54	1815.32	2146.19	2416.04	2644.83	2243.02	2821.19	1863.96	2878.22	1970.09	2637.84	2474.99	1940.15	2538.07	2884.89	2341.71	3146.82	2328.66	2102.54	2135.91	2179.19	2623.66	2475.81	2316.38	2734.82	1662.7	2568.77	2685.65	2091.07	2485.16	2949.55
ACAT1	3402.92	2937.39	3656.44	2901.94	3119.89	2875.13	2449.67	3525.06	2665.32	3474.95	2819.05	3063.83	2765.84	3187.93	3360.99	2550.33	2694.58	3806.8	3429.04	2949.09	2782.62	3046.99	3491.6	3042.37	3343.86	3782.75	3735.04	2544.34	3426.19	1494.57	3773.71	2777.53	2934.21	2981.01	2753.24	1360.61	3104.25	3498.85	2748.09	2931.51	3498.52	2593.11	3628.43	3942.77	3124.5	1224.79	3709.13	1963.38	3203.84
ACAT2	3331.69	3573.14	2313.37	3987.74	2993.9	3396.52	2710.01	5205.68	2840.96	3423.59	3342.91	4240.67	4079.45	3896.84	3726.24	3650.72	4161.9	4498.66	3519.82	4486.18	4588.8	4142.66	6896.15	5609.57	3509.35	3601.38	3837.3	4176.96	3672.87	3839.2	4295.28	4221.9	4940.45	4925.61	3584.66	3468.68	4160.4	4615.75	5181.24	4653.71	4086.34	4022.65	4362.24	3789.67	4999	4348.3	3575.39	3411.77	5035.58
ACBD3	1907.76	2060.53	2118.46	1848.17	1943.82	2354.34	2255.6	2049.22	1920.29	2496.36	2672.95	3282.16	2254.37	2254.54	2406.69	2535.24	2226.36	1779.75	2262.44	2486.64	2121.46	2692.16	2341.98	2161.05	2947.16	3021.35	2253.85	2570.21	2756.82	1972.43	1613.02	2572.02	2546.35	2534.75	2235.77	3009.19	2251.58	2265.42	2201.36	2380.45	2596.52	2514.58	2044.76	2118.12	2189.76	2068.02	1938.94	2195.93	2297.12
ACIN1	1250.41	1166.33	840.448	703.869	906.568	1097.34	878.983	850.272	815.84	893.84	1211.24	1122	684.441		826.395	1065.4	525.272	528.218	631.636	844.899	806.34		749.785		1000.03	1073.83	1062.91	659.687	1066.47		664.801	769.863		986.337		1304.09	1309.04	419.814	1117.56	914.954	539.499	669.979	630.342	761.516	497.179	592.649	642.31	815.973	1011.39
ACLY	27324.3	28506.1	27430.1	26644.1	29856.3	28177.3	28348.8	29244.4	27892.5	27403.8	27501.8	27046.6	27549.7	27547.7	28608	28442.9	28820.5	30398.1	27524.6	29135.1	25072.4	28012.3	28118.9	29545.3	27834.5	21391.5	27338.8	27695.2	27679	21104	27809.4	25932.2	29166	27601.8	28190.7	21764.4	28069.4	27858.5	27652.8	28799.2	27845.1	28737.2	26792.7	28343.3	26379.2	22999.8	27781.3	21182.3	28337.1
ACO1	1462.88	1342.53	1160.34	1841.32	1533.33	1754.86	1210.57	1588.02	1586.03	1676.5	1416.76	1862.69	1638.34	1451.75	1834.44	1800.9	1418.86	1497.48	1643.03	1570.25	1510.78	1632.43	1255.33	1374.29	1431.22	2240.36	1283.95	1412.36	2061.98	1558.19	1782.96	1539.75	1341.08	1689.59	1337.27	1357.54	1118	1349.93	1184.36	1702.76	1491.64	1248.98	1344.41	1777.17	1769.06	1853.3	1373.33	3580.41	1227.16
ACO2	6126.05	6521.41	5445.78	6042.26	6198.16	6578.74	6141	5703.2	5871.42	6232.16	6168.92	6614.75	6119.1	6401.71	5968.88	6557.56	6278.03	6182.81	5192.95	5722.91	6476.49	5902.4	6502.96	6372.62	5742.47	6250.22	5596.19	6186.04	6541.3	5133.26	5667.26	6159.58	5748.85	6199.15	5587.6	5782.42	5831.5	6229.6	5732.86	6564.12	6204.63	5996.83	6434.85	5990.18	6570.67	5559.67	6798.79	5841	5862.39
ACOT13	3251.66	3472.4	3516.25	2400.84	3332.76	3883.64	3102.04	4854.13	3827.8	3110.86	3742.53	4701.25	3520.25	3613.87	2425.77	3302.43	2670.45	3861.03	4385.24	3451.02	2598.23	2771.23	4326.06	3812.65	3858.88	4667.5	4448.58	3348.19	3998.16	4682.23	4338.96	3292.35	3837.99	4540.14	3147.5	4735.89	4513.67	4305.49	3018.78	2268.06	3926.82	3656.67	3888.72	4216.95	4116.98	3968.22	3897.32	3600.94	3890.39
ACOT7	12543.8	11697.2	12556	13232	13078.8	11738.7	11379	10812.4	11406.9	11673.1	12609.5	13576.4	13321.5	12788.1	11703.4	14572.5	13165.8	11415.7	11861.5	13355.1	11727.6	13286.2	11043.4	11293.6	13958.7	12965.1	12220.6	10942.1	13902.5	14108.6	10245.2	12482.2	13842.2	12856.3	15252.1	14129.6	11871.7	11551.5	13637.5	11005.1	12852.3	12579	12049.1	10688	12722.8	14125	11767.1	14081.4	12662.7
ACOT8	553.448	999.643	1086.68	933.623	677.155	829.642	424.14	974.584	834.984	1040.84	583.787	1524.24	1143.9	712.959	644.135	1012.71	742.372	904.074	485.53	867.118	715.282	713.656	1312.42	668.836	741.342	840.542	1090.74	809.708	817.727	675.411	621.69	529.591	726.542	1050.18	1361.24	929.477	809.09	804.566	907.096	805.289	983.461	868.399	633.707	662.154	853.364	798.995	808.378	840.159	717.195
ACOT9	1222.04	986.098	972.501	1252.8	541.865	1167.02	1365.6	936.084	920.539	681.932	971.107		1036.96		664.878	931.445	527.113	1015.01	905.651	1088.38	886.941	1011.74	965.41	1274.45	1836.68		1271.42	1075.47	759.335				1267.46		1082.65		1303	702.699	633.983	648.51	1322.7	1401.79	734.292	1086.25	1269.09	1094.94	1163.02		800.299
ACOX1	1454.89	994.632	1146.35	1011.01	1104.71	859.138	1242.71	1331.88	1463.32	1354.63	1220.3	465.963	1006.67	1270.58	1357.09	1013.43	1515.22	1064.27	1228.64	915.588	1006.47	1101.51	817.588	1075.64	1437.97	4275.55	898.264	678.438	1054.33		1092.99	1010.74	888.801	983.131	1036.47	2131.59	795.861	1029.44	922.701		1098.06	894.068	908.052	900.978	1032.29	924.92	923.69	1141.59	390.975
ACOX3	1307.17	1209.08	969.843	1299.92	1070.81	1402.62	959.564	1735.9	1397.02	1283.78	1496.67	1475.55	1414.81	1389.57	1057.16	1258.67	1939.09	1538.09	1663.81	1230.19	1468.09	1460.82	1094.99	1092.29	1439.96	2489.66	1566.76	1305.62	1447.73	2407.12	1289.84	1579.35	1609.73	1279.61	1512	2548.65	1083.46	1493.15	1556.3	1330.67	1487.35	1157.02	1655.96	1060.49	1268.55	1496.21	1055.75	1547.52	1586.39
ACP2	785.938	1081.67	721.043	927.827	881.74	856.596	591.924	1019.58	1108.06	1018.49	1130.96	934.373	937.336	1174.92	1119.47	941.9	1192.17	1071.77	871.699	1264.93	340.731	1039.07	830.237	1089.48	819.963	904.58	1337.28	1099.4	873.124		941.47	992.738	1133.28	898.065	607.16	1802.4	1072.72	1014.86	758.122	1146.35	920.568	765.877	936.918	1044.05	1155.22	576.612	1477.11		953.019
ACP3																	96.1085									1590		1035.59		1249.45			1231.08			5649.12									211.361		92.9158
ACP7															607.415											6498.41								98.6964	395.073	1011.98
ACSF2	1540.72	1427.78	1011.75	1617.98	1022.18	1232.01	1643.6	1581.8	1277.8	1194.13	1744.29	1380.34	964.539	1257.6	935.353	1076.02	1417.81	1223.82	1361.65	1871.47	1988.49	1502.68	1081.79	1702.54		1249.09	1289.62	1407.96	1235.76		2076.11	1669.26	1404.29		1851.39	1716.45	1419.15	1361.12	1454.39	1397.65	1594.16	1664	1346.15	1667.56	1527.61		1036.85	1259.25	1178.49
ACSF3	1265.35	1237.97	1039.39	915.792	1217.71	1006.9	887.4	831.676	1141.36	1128.19	973.448	869.761	980.705	1033.89	895.542	935.256	1126.48	969.088	1118.6	899.521	993.513	984.787	1030.65	1121.68	863.194	825.863	1165.6	1181.29	1018.17	1013	888.012	814.619	889.766	674.995	635.138	275.419	1122.22	975.526	1048.07	895.787	893.077	910.008	898.89	1017.73	1192.82		854.816	486.947	916.257
ACSL3	3746.34	3830.85	4079.91	4315.51	3973.83	3630.65	3894.16	3720.85	3436.8	3697.97	4333.36	3006.6	3435.24	3312.28	3547.81	4061.9	3616.88	3241.9	4235.87	3517.66	3182.38	3812.38	4074.6	3619.03	4211.89	3712.97	3797.1	3646.14	3593.63	2984.98	3488.9	3636.8	3855.48	3179.03	4420.74	3183.88	3435.36	3461.94	3832.06	3982.71	4058.23	4310.44	3656.43	3651.27	3134.68	3846.21	3613.27	3628.43	3463.83
ACSL4				2929.47			2577.54		2111.47		3961.6	2179.58			3730.07	2563.08	1700.61			1816.23		2392.43	2214.76	2271.95		2210.18				2484.21	2760.36						2439.37	1756.15			3222.78				3646.68	2922.78
ACSS1	1302.82	818.291	967.584	1138.95	1360.96	1609.01	1587.37	792.766	1197.13	1392.03	1273.41		1181.94	993.982	1306.04	749.668	1169.14	795.684	303.03	1168.76	1288.67	1401.35	1557.9	1290.85	1146.5	1234.84	1062.4	947.897	844.622	826.02	1027.08	1128.69	1399.05	1499.75	1513.37		1484.99	1144.88	1958.93	1246.17	1437.2	957.228	1202.61	1277.46	1305.75	859.1	852.945	1553	1240.26
ACSS2	1578.55	849.119	574.617	1257.84	828.621	1181.51	1106	813.204	622.313	922.724	1089.21	1313.71	934.231		636.127	754.698	442.149	805.597	900.426		1209.27	1120.93	882.724		1202.45	1252.1	970.593	911.696	1882.88	1332.67	965.331	978.978	811.955					575.939	1076.17	1032.87		756.596	988.096	1024.66	1169		1429.27		847.09
ACSS3	1173.2	1188.13	1296.6	870.2	964.311	1038.23	1408.16	1313.98	1099.69	1038.72	864.312	1137.42	1529.81	1029.42	1299.65	1673.39	1188.4	1427.31	1162.67	1184.4	1614.3	1218.64	1488.18	1243.27	1565.35	1563.73	1192.48	1085.52	938.697	976.25	1315.65	1431.22	1521.74	1161.58	1381.97		712.427	1162.85	1413.15	1205.75	1178.72	1536.81	1301.01	1378.85	1059.08	1204.94	1046.12	1285.61	1339.18
ACTBL2		1130.67	1037.44	1129.03	1371.56	1050.36	1166.52	1956.02	1378.23	1374.01			1482.01	1095.31	1382.63		1025.77	1143.2		1074.47	2914.33	1302.88	1578.26	1814.67	1147.36	2603.81		1531.91	1216.26				2040.29		1197.06			1615.68	2767.9	2313	1084.15	964.75	1732.13		950.33	667.943	683.936		984.705
ACTL6A	5252.12	4768.49	4190.24	5892.27	4898.15	5908.02	4385.29	6067.77	5223.35	4880.53	5060.68	4974.88	4683.85	5308.63	5169.58	5075.94	5456.7	4781.91	4999.58	4814	6030.2	5602.39	5664.82	5391.56	4830.58	4108.02	4250.71	4962.4	4875.97	4692.14	4054.29	4966.66	4989.13	5546.04	4335.05	3423.46	4802.12	4961.89	5076.76	5232.63	5406.48	5223.18	5454.98	4807	4877.1	4247.29	4456.3	4320.41	5922.78
ACTN1	3001.82	1882.99	2577.47	1483.41	3351.23	2193.62	2522.78	1129.84	2450.34	2446.6	2700.62	2946.6	2637.8	2973.53	3088.05	2338.5	2549.98	2962.19	2154.77	2731.62	2526.3	2642.06	2329.1	2878.3	2389.61	10391.1	2800.91	2730.11	2611.59		3111.73	1533.06	2790.18	2660.52	1667.04	3208.83	2913.83	2557.43	3021.48	2515.14	2032.86	2437.28	1459.09	2745.49	2647.35	1247.57	2621.8		2386.74
ACTN4	5382.61	4619.12	4610.5	3546.89	6426.7	4239.08	4943.25	2167.02	4665.53	4444.71	5400.09	5766.83	6453.11	6155.56	6530.97	5022.52	6270.73	7120.13	5207.2	6439.09	5670.77	6435.2	5188.95	5480.36	5399.25	15912.1	6007.43	6753.03	6175.43	2348.24	6828.66	4161.02	6604.26	5070.57	4759.65	5193.15	6190.47	5799.59	6592.45	4707.05	4056.21	4120.24	3634.3	6659.17	5416.9	2165.14	6521.24	1416.11	5779.94
ACTR1A		807.129	298.47	1506.41		281.651	546.107			185.603	491.345		1564.8	331.776		301.767	931.627	1251.48		374.894	658.048			780.135	764.072			1133.81	512.479		224.035	1269.82		943.275	1758.15			769.242	730.86	644.364			433.878	1148.87	527.868		349.494
ACTR1B	229.427	489.637	870.775	604.837		624.289		1271.7	706.386	643.483	1827.77	498.095	605.881		715.714		1438.67	611.142	243.927	822.479	2915.3	685.483	1603.52	1581.04	555.264	1575.52	632.894	1225.68			1516.36		1084.86	735.679	1043.77	449.268	1172.52	769.105	1590.07	1032.72	573.96	578.845	928.065	736.473	253.598		858.847		1626.34
ACTR2	14352.2	15889.6	14654.3	15116.9	13157.9	15485.6	13471.2	17255	14366.1	14191.9	13779.3	11961.9	12256.6	13341.8	14300.2	13025.4	14248.6	14353.8	12540.5	13918.6	13821.4	13140.8	15979	16509.2	12271.9	29371.7	13246.7	14000.5	13057.6	7547.71	13622.1	13412.8	13493.9	12701.5	12308.7	8156.35	15468.8	16416.9	14162.9	16106.3	13161.4	13006.5	12873.9	12690.9	12272.8	6894.55	13572	6593.76	13864
ACTR3	10398.2	9905.28	10333.4	10363.9	10146.3	9922.05	11278.7	11721.4	10006.1	10680.5	10032.7	10157.3	10757	10036.1	9940.38	9310.5	10555.2	10479.3	10266.6	9260.71	9492.3	10449.1	9915.82	10733.9	10589.1	25244.8	10129.8	11127.2	9449.8	6150.86	9710.66	10281.4	10346.9	10497.3	8255.97	8781.78	9817.92	10774.1	9992.92	10624	10624.3	9688.13	10042.2	10919.2	9868.53	6348.92	10198.5	5292.25	10346.5
ACTR6	1469.65	1308.19	1577.09	1301.59	1309.43	1430.12	1148.35	1357.88	2135.75	1428.63	1821.84	2649.17	1504.42	1828.83	1461.65	1577.18	1777.19	1241.58	1341.54	1693.46	1206.64	1813.64	1035.47	1183.57	1562.95	1275.82	1413.69	1446.9	1441.19	3395.88	1441.38	1514.38	1729.49	1419.97	1421.84	1444.33	1740.17	1390.18	1575.66	1653.82	1579.68	1034.09	2073.08	1018.66	1290.44	1387.45	1379.14	2929.06	1544.58
ACY1	848.272	1280.14	899.193	1137.83	967.265	1277.16	541.323	1064.98	1030.64	1195.61	938.489	1192.97	797.89	1112.92	1076.01	1088.04	1069.86	1512.7	1017.03	1124.46	1093.41	1453.01	1049.52	978.047	694.551	920.986	1190.75	1200.39	1154.36		1271.66	1424.51	1175.53	1329.66	891.735	829.962	986.434	1202.44	1092.62	1122.94	1407.06	1035.96	908.094	1077.53	913.932	588.754	1108.73		1049.08
ADAM10	1709.63	2107.07	1757.33	1755.84	2047.39	2149.88	2196.41	878.658	2074.08	2266.72	1921.15	593.492	1884.3	1614.5	1444.46	2316.45	1823.86	2265.05	1570.21	1506.95	1072.83	2454.37	1631.14	2241.49	1831.66	2298.58	2013.83	1863.29	2279.52	1943.41	1868.61	1410.13	1357.97	2665.13	1238		1793.09	1724.49	1879	1683.89	1633.36	2814.48	1668.6	1808.53	1950.29	3270.48	1693.1	1474.92	2545.94
ADAR	2765.5	2578.62	2193.67	2506.35	2672.65	2316.52	2248.95	2456.45	2412.57	2323.38	2723.79	2434.29	2262.82	2245.8	2498.71	2100.77	2216.77	3073.61	2506.59	2829.76	2604.29	2564.28	2720.3	2459	2489.04	2681.04	1753.49	2539.34	2030.94	2034.79	2186.69	2410.74	2183.5	2377.3	2396.43	2195.98	3174.03	2740.43	2159.12	2467.66	2512.88	2093.87	2412.42	2429.44	2854.86	2180.84	2354.47	2017.82	2069.05
ADD1	2569.52	2110.74	2328.08	3442.11	2409.4	2945.85	2960.33	2391.39	2217.72	2726.39	2894.9	2252.86	3953.91	2441.6	2563.13	2917.1	2405.34	2421.79	2989.37	2192.18	2677.05	2506.28	1979.33	2166.25	2878.48	1740.7	2574.88	2838.49	2232.05	2532.88	2672.1	3101.75	2671.99	2821.9	2774.64		2362.33	2313.93	3561.52	2190.28	2790.71	2154.44	2325.24	2775.12	2954.06	2940.5	2446.48	3359.22	3159.71
ADD3	1121.24	1180.52	1331.38	1333.6	1356.76	1300.31	1175.84	1385.78	1425.49	1390.73	1593.82	1487.12	1185.38	1445.31	1347.14	977.012	1177.84	1481.11	1310.77	1207.9	1357.99	1186.57	1030.35	1102.04	1187.39	1427.9	1002	1372.49	1231.03	1674.88	1085.36	1826.38	1390.78	1449.14	1337.02	1669.46	1239.31	1374.69	1323.9	1195.35	1232.95	1430.94	1490.76	1309.34	1542.3	1360.11	1282.4	1782.12	1638.03
ADH5	15881.2	21196	13814.6	17578.3	16533.5	19397.6	14098.6	22251.6	17166.6	19475.9	18435.4	17627.6	17271.3	18147.1	17181.4	17916	17549.7	15689.6	16890.1	16824.7	11525.7	17868.3	17052.8	19894.4	17170.4	16753.7	14480.8	17717.4	16957.1	20602.7	16365.4	19850.1	15585.3	18458	19525.3	26353.3	17684.2	17682.8	16939.1	19109.9	19283.8	20775.5	14984	15591.3	19876	21204.5	17588.8	20980.1	16534.6
ADI1	2038.57	2007.5	1540.06	1664.22	1654.83	1789.03	1227.17	1372.14	1732.52	1921.15	1612.73	1552.57	1650.57	2095.9	1870.63	1661.33	2252.07	2402.44	1653.52	1940.73	1696.43	1993.48	1895.93	1924.09	1850.1	1064.01	1225.53	1690.91	1692.54		2062.08	1438.79	1954.04	1639.61			1609.16	2197.25	2190.45	2419.1	1739.03	1873.68	1126.59	1609.78	1425.35	799.004	1515.78	801.739	2333.09
ADK	4915.57	5418.93	4882.64	5999.46	4997.18	6271.65	5785.24	7444.04	5294.27	6016.42	5800.55	5693.55	5197.8	5941.34	5020.28	5696.07	5110.17	6018.62	6502.12	5685.62	4746.6	5452.24	5066.42	5827.31	5060.67	4622.65	4181.36	5600.64	4937.17	4320.72	5417.12	5292.68	5237.03	6225.51	5010.5	5259.6	5476.44	6497.31	5379.6	7385.38	5610.35	5328.51	6428.67	6410.29	5541.07	6373.87	6027.72	5794.96	5967.26
ADPGK	2171.69	1947.7	2404.21	1723.7	2064.3	1715.46	2077.79	2797.79	2104.31	1903	2022.73	1858.72	2279.72	1832.11	1963.38	2044.11	2002.34	1983.78	1700.19	2216.43	2503.64	3141.68	3131.28	2556.68	2124.05	1864.26	1860.54	1959.74	2375.12	1773.95	1563.28	2333.1	2470.42	2421	1585.51	1820.43	2003.64	2352.13	2723.99	2697.43	2334.31	2548.98	2236.02	1797.34	2128.27	2500.94	2147		2635.06
ADPRS	437.575	591.279	604.653	508.062	440.398	439.826	632.461	936.451	833.631	665.773	996.652	726.929	376.734	539.298	665.472	562.817	717.713	794.908	648.826	433.414	629.981	648.976	580.862	657.361	605.441	1026.02	609.436	472.626	622.187		547.806	357.09	919.743	489.974	761.201	628.807	1022.5	314.542	523.003	318.931	565.246	563.39	483.081	713.643	183.918		384.317		854.5
ADRM1	4387.25	5115.53	4243.64	4966.37	4009.54	3889.99	3083.85	3969.78	3788.69	4129.82	4428.69	4121.3	5999.19	5690.64	5355.84	4552.05	5168.71	4154.99	6041.69	5566.71	2994.85	5088.36	4903.02	5210.76	5163.47	4107.1	5151.35	4668.61	5685.48	4505.81	5304.78	5820.3	5282.96	5602.99	6164.16	4708.74	6062.58	4760.18	4678.71	4034.21	4601.29	4429.08	4615.54	4701.2	4372.35	2619.59	4405.98	3992.54	5012.11
ADSL	3069.23	2787.71	4142.19	3728.23	3005.33	2543.41	3710.66	2273.1	3940.8	3625.27	2827.82	2222.63	2981.08	2719.61	2908.08	2487.3	2813.56	3426.18	3209.97	2254.53	2342.9	3083.82	2595.28	2862.22	3164.82	3321.35	3132.41	3537.2	3118.27		2476.43	2449.78	3028.78	2733.36	2893.44	1535.93	2530.5	2612.82	2576.06	3061.38	2828.15	3603.03	3220.68	2870.36	2705.37	1726.82	3351.07		2748.05
ADSS2	4505.34	4573.59	5397.3	4728.38	5150.39	5435.51	4950.2	6097.9	4662.11	4988.69	4557.6	4064.42	4870.01	4314.05	5057.13	5287.27	5321.65	4663.14	4774.88	4732.1	5335.63	4790.36	4875.02	5292.43	4204.27	6750.79	4573.7	4571.37	4790.4	3795.9	4115.48	5254.56	4947.81	5081.85	4890.87	4006.67	4973.28	5359.87	4593.22	5920.33	4721.66	4682.47	4800.63	4896.63	5360.7	3908.1	4923.31	4329.58	5290.85
AFDN	809.865	1108.32	1802.97		1186.44	961.292	1257.06	1066.96	1213.95	979.792	789.242	1018.82	1171.35	1087.27	1651.66		793.634	1410.75	1408.52	1758.2	1127.32	1458.01	1225.98	1335.11	2001.44	2106.48	713.006	785.51	871.379		1553.69	1087.4	1160.46	1284.77	1344.1	1308.59	1272.17	960.864	1292.9	1060.05	1041.15	1248.24		1336.14	1813.51	377.255	1672.1	665.534
AFG3L2	2245.97	1922.61	2589.48	2287.02	2156.93	2115.4	3039.56	2158.23	2482.53	2001.46	1822.48	1693.46	2081.81	2525.09	2600.96	2288.83	2056.43	2274.53	2417.79	2398.84	2203.26	2230.92	2117.36	2315.77	2434.78	2454.23	2356.5	2550.75	2322.9		2921.96	2020.72	2496.72	1737.46	2171.05	1367.67	2211.51	2521.17	1961.01	2215.41	2458.17	2327.71	2033.38	2652.39	2611.95	1513.87	2386.54	740.354	2086.46
AGAP3	2098.22	1371.11	1437.24	1400.99	1288.4	1831.28	1774.13	1218.75	1086.97	1173.49	1585.04	1201.9	1164.37	1257.22	1722.14	1324.01	1163.95	1569.83	1907.3	1358.12	1551.04	1204.46	1490.01	1440.39	1354.45	1251.07	1651.78	1031.52	1527.74	977.59	1190.23	1530.12	1332.76	1307.86	1653.4	1224.24	1363.71	1263.49	1208.64	1687.09	1236.28	1051.98	1496.57	1129.17	1257.56	1063.53	1172.62	1094.11	1081.42
AGFG1	629.247		584.882	176.257			334.991				172.009		337.969	230.022			314.189	264.081	218.584	279.94	435.789				449.813	809.172		348.934	297.281		347.254	208.61	316.41		264.858				264.14		391.852			564.822	483.196		496.614		342.496
AGK	774.096	1106.14	1333	985.83	809.568	1127.68	1530.51	776.491	1211.13	1034.44	892.96	1328.39	1378.97	894.095	663.767	793.761	842.669	1445.63	1079.89	1003.34	612.051	1551.72	970.991	875.158	1602.4	788.375	874.703	1174.48	945.271	449.977	645.847	1840.54	957.687	982.449	1091.76		1670.14	1021.74	893.613	700.703	1402.15	1178.2	999.234	1489	1244.89	1014.78	1375.03	991.031	1207.73
AGL	1685.37	2009.8	1449.36	1945.12	1837.19	2041.27	1514.33	1804.57	2036.1	1993.74	1960.17	1673.31	1837.91	2022.69	1921.67	1900.07	1874.11	2052.4	1973.45	2061.17	1649.4	1904.85	1699.3	2052.92	1697.18	1939.12	1587.43	2051.08	1905.64	1691.38	1661.37	1736.24	1741.12	1931.7	1309.31	1348.95	2031.37	2218.52	1694.84	1955.03	2123.31	1893.2	1568.05	1840.37	1807.54	1641.09	2000.79	1657.39	1855.62
AGO2	2803.93	2920.81	3349.69	2857.57	3367.39	3135.5	3772.5	3568.17	2989.75	2891.59	3061.19	3469.69	2381.34	2618.36	2981.49	2607.63	2840.68	2646.09	2986.26	2903.29	3508.16	2570.38	3018.86	3153.94	3400.45	3416.68	2748.02	3129.32	2958.16	3139.4	2947.18	3071.51	3174.09	2713.82	2613.65	3262.23	2804.67	2673.7	3052.95	3157.58	3064.72	3546.61	3329.02	3153.3	3154.85	3596.97	2733.44	2946.55	3018.48
AGPAT5	1549.58	1638.43	1747.01	1731.91	1457.54	1517.25	1226.84	1557.89	1196.03	1331.7		1148.63	1542.36	1624.42	1732.32	1450.53		1105.09	1049.93	1300.1	1610.98	1287.18	1580.75	1170.21	1853.31	1540.21	2020.52	1666.82	1761.2		1019.2	1325.53	1754.99		1485.88		1714.86	1352.64	1687.04	1459.78	1568.4	1270.16	1995.61	1251.39	1327.03	1130.46	1341.66	1874.42	1691.82
AGRN	1879.79	1983.89	2119.6	2038.95	2424.96	1744.75	1691.14	3127.72	1956.32	1889.13	2347.66	1409.04	1912.42	1821.35	1863.41	1965.52	1927.19	1505.63	1806.67	1885.3	2482.98	1944.43	2391.19	2034.68	1296.02	2036.17	2037.74	2111.94	1854.53	1844.48	1895.45	2355.03	1839.88	2013.87	2061.49		2280.79	1959.97	2483.61	2142.31	1680.04	2405.39	1835.62	1410.39	2865.64	2546.33	1763.48		1809.52
AGTRAP			577.132		486.053								1065.25	544.514				740.077		473.735				379.399	577.746		977.482	554.333										656.678			875.33		521.161		730.682		1078.48
AHCY	44079	60041.8	38443.9	55563.1	47576.4	64176.8	38784.1	61307.5	63768	67807.8	67957.3	76123.3	67243.1	72120.5	62464.4	74510.2	63358	65100.8	62938.3	69835.9	51468.8	70274	63870.3	75483.7	62172.1	60103.2	55651.9	66024.5	60325.6	74739.1	50700.1	73101.7	56583.5	69445	62343.7	79599.7	65145.2	66393.9	62865.8	63752.1	67787.2	68167	63335.4	57557.4	64899.1	73179	65498.1	83000.2	62920.2
AHCYL1	2661.66	1699.24	1569.41	1915.58	1848.08	2002.47	1508.51	1811.09	1394.47	1417.64	1597.39	1809.16	1540.46	1028.09	1555.47	1602.17	1921.11	1016.51	1526.53	1067.81	1395.24	1239.85	1461.61	1647.9	2150.32	1322.25	2319.45	1636.39	1474.94	1959	1306.18	1847.38	1579.95	1716.27	1015.2	1801.39	1697.61	1509.99	1541.8	1235.68	1283.01	1625.46	1068.15	1463.92	1265.49	1640.46	1559.36	1692.97	1716.98
AHNAK	3922.14	4833.25	4549.14	4395.87	4661.71	5208.27	4793.45	4143.09	4695.4	4629.94	3865.61	4174.13	4589.95	4988.79	4585.68	3917.08	5089.72	4962.11	4964.83	5129.8	6215.44	5005.58	5157.57	5968.63	4409.32	12768.3	4510.92	5076.42	4715.16	1667.78	5120.57	4383.52	5166.74	5115.78	4435.15	6659.06	5727.17	5584.9	6183.43	5169.05	4470.33	4263.3	4619.22	4750.27	4795.35	2354.78	4991.09	1433.15	5115.84
AHSA1	33884.4	40429.9	34370.8	42799.2	38094.6	38124.1	29090.6	34643.1	40811.5	38098.4	39973.2	40996.2	34487.2	38501.5	35137.5	36856.2	41147.8	34401.2	38968.4	35736.8	31079.4	40229.8	37474.7	37235	40028.6	25763.5	35627.5	35415.3	36195.8	38617.2	34745.5	40297	34539	38048.1	42255.1	36101.5	40864.8	36862.3	40559.8	36851.6	40811.1	38187.3	36677.8	36096.9	38059.6	39459	36213.1	36478.5	37016.8
AHSG	461.044	640.739	406.971	505.755		433.072	269.537	429.593	570.291	407.731	643.408	413.897				639.978	480.217	333.566	486.156			140.511	332.718	268.838	206.186		501.957	362.537	345.6		335.823		254.449		508.836		544.829	589.076		661.371	261.719		192.055	352.979	289.612		278.076		194.655
AIDA	1470.77	1441.89	1107.69	1121.67	1568.47	1561.21	1270.02	2229.15	1195.57	1741.54	928.543	1202.71	1302.29	1267.41	1456.39	1441.75	1259.62	941.144	1397.14	954.558	2087.22	1533.84	2063.07	1803.42	1635.79	1926.5	1086.45	938.098	1452.07	1997.03	1034.52	1247.9	995.354	1630.65	1609.21	1960.28	1527.34	1428.62	1686.16	2092.58	1374.02	1615.24	1066.83	1213.32	1119.68	930.502	1329.71	1920.94	1004.95
AIFM1	5331.69	6703.59	5087.19	6325.43	6081.42	7680.96	5564.21	6316.89	7334.21	7635.81	7258.17	6676.74	7951.19	7388.46	7213.78	7089.76	7252.4	6997.01	5060.32	7842.21	7322.68	6820.17	7612.75	7486.25	6347.73	6413.72	5308.94	6694.98	6457.4	7968.12	5018.86	7312.34	5757.31	7392.96	7146.54	8081.41	7479.47	6944.59	6852	7081.13	7336.34	6875.76	6168.75	7229.22	7076.84	6784.06	6081.59	6806.52	6789.96
AIFM2	2692.99	2173.49	1983.44	1910.06	2470.62	3150.43	1659.84	2766.26	2775.76	2521.27	2478.53	2587.61	1752.83	2990.04	2377.53	2641.26	2269.6	1538.31	3585.9	1996.92	2317.78	2094.1	2220.38	2575.27	2800.98	2583.16	1963.36	2225.83	2399.85	3893.42	1387.18	2543.23	1751.58	2356.89	2895.89	3088.14	1549.73	2137.45	2204.49	1964.6	2793.81	2901.76	2063.01	2080.89	2068.09	3973.3	2234.66	3726.65	2358.32
AIMP1	3349.56	3969.25	3466.96	3268.81	3394.71	3446.1	3363.18	3913.37	3324.08	3470.35	2878.84	2969.7	3260.14	3682.97	3246.19	2915.73	3376.52	3733.3	3285.16	3530.01	3805.53	3731.44	3379.48	3772.73	3564.55	3654.89	2792.01	3655.29	3130.56	1887.94	3987.66	3255.15	3362.5	3783.6	3060.3	2232.62	3613.01	4000.77	3258.39	3730.3	3830.75	3293.41	3434.64	3776.14	3335.23	1799	3723.52	2150.36	3805.81
AIMP2	13836.6	14529.5	16316.7	16804.2	15038.2	14267.4	16971.7	19461.1	15960.6	13183.3	15484.8	14513.1	13900.7	15775.2	14992.6	15470.7	14725.5	14980.9	14800.5	16005	14404.5	14628.3	17782.7	13165.4	15477.1	9424.53	16668.1	14258.2	15263.2	12588.5	17379.8	17618.6	18673	18543.1	17316.3	10709.5	15098.5	14677.1	15445.6	11585.9	13165.1	12734.1	17932.3	17790	14851	12412.2	15470.9	15012.9	12484.2
AIP	4106.02	2661.27	2743.72	2557.09	3637.72	2822.24	3823.11	1280.47	3822.53	3248.01	3530.59	2756.9	3568.01	4216.24	3991	2813.19	3590.31	3561.41	3366.54	3564.85	4019.68	3583.86	3500.82	3848.22	3564.97	2555.71	3843.49	3973.96	3920.69	1241.04	4115.14	2720.74	3528.98	3026.02	2910.71	967.689	3393.49	3343.06	4226.93	3443.47	3162.16	3308.7	2578.06	3928.74	2972.77	1309.37	4384.59	1086.09	4087.66
AK1	4383.78	3554.58	7357.83	4830.97	4356.06	5767.57	6672.63	2601.22	5222.8	4804.28	4447.03	4323.76	6382.54	4300.8	6096.62	5193.05	3878.78	5730.06	7051.73	5069.69	5591.04	4926.56	5570.12	5994.87	5464.08	7283.42	4880.42	5286.21	5353.37	2690.17	8154.03	5102.76	5903.25	5424.51	6563.4	1940.92	4193.4	4706.49	5052.66	5364.36	5496.92	4877.4	4981.11	6571.33	5595.36	3411.49	5631.13		6366.76
AK2	1057.7	1661.07	1190.07	1197.6	1415.61	1193.79	1579.1	1066.63	2115.3	1663.77	1320.28	1629.54	1685.82	1464.05	1543.76	1291.35	2076.08	2326.89	1599.41	1381.1	1749.78	1727.71	1801.58	2256.1	1503.19	5160.92	738.731	1680.84	1445.62		2007.2	1562.46	1682.89	1173.1	1113.52	1609.47	1169.53	1861.49	1269.93	1804.22	1769.28	1787.9	1151.04	1385.75	1173.19		1567.66		1815.91
AK3	5128.46	5110.13	4971.6	5058.91	5157.94	4515	6416.21	5321.86	4369.52	4746.67	4043.6	4322.72	4447.48	4929.15	4113.8	2732.95	4561.67	4251.48	4046.63	4303.94	4052.6	5032.38	4524.47	4891.56	3958.7	5368.28	4474.83	4258.01	4270.73	7804.21	4829.64	4082.42	4158.96	4132.95	3246.41	2434.01	4265.73	5099.98	4430.88	4853.57	3830.35	4787.4	4137.02	4030.87	4617.88	3304.24	4110.81		4267.62
AK4	1231.92	1413.7	1314.37	1089.46	1410.56	1414.96	1437.86	853.505	1770.18	1325.03	960.265	1126.34	837.198	1236.47	1520.33	1129.05	1124.27	1283.88	819.495	1516.29	1112.18	1409.01	1139.13	1271.26	1248.97	2276.23	1044.05	1239.57	1426.58		1270.73	682.281	1046.36	1130.35			1276.17	1007.26	1192.63	1311.05	903.976	1191.58	1243.04	1322.28			1038.24		1781.16
AK6	2087.61	1812.97	1506.29	2021.76	1467.15	1300.97	1687.74	1827.39	1583.89	1893.58	1764.66	1680.55	1360.86	1862.24	1713.18	1725.71	1782.88	2145.14	2457.85	1585.68	1944.8	1696.12	2114.19	1680.81	1863.16	971.309	1617.5	1374.26	2328.51	2723.52	1716.7	2273.82	2245.14	2041.51	1276.99	2565.4	2979.81	1371.5	2145.14	1763.48	1985.24	1698.17	1751.4	2223.75	1354.33	2187.82	1446.84		1464.71
AKAP10	1180.36	860.532	1259.25	1335.36	1184.03	1218.83	1000.13	1619.32	1017.79	1918.94	1567.3	1279.09	928.198	944.417	1271.64	1678.86	1214.59	701.396	1106.13	1010.18	1212.74	1348.08	1117.37	698.489	995.176	1478.64	1593.82	859.184	800.458	890.707	941.549	758.09	1325.77	1024.08	1210.28	1661.69	901.927	1100.56	1475.09	1228.77	1418.48	909.774	944.534	1222.69	745.24	1638.15	760.688		1210.48
AKR1A1	1451.16	1296.04	1154.35	1239.96	1388.12	1866.85	1172.92	1855.93	1215.44	1442.38	1199.85	1463.46	1537.76	1475.23	1266.54	1579.78	1193.88	1517.31	1795.73	1808.33	1927.37	1649.94	1528.66	1364.68	1507.33	3417.1	1181.41	1517.15	1442.66	1774.16	1577.23	1247.97	1264.46	1476.62	1799.88	1480.89	1525.37	1286.05	1398.55	1978.93	886.872	1283.77	1291.07	1229.94	1125.35	2192.59	1103.67		1224.9
AKR1B1	536.684	1033.18	387.991		533.647	1120.62	624.542	819.139	742.386	572.686	638.307		1171.46			748.543		1136.8	895.089	655.887	777.213	658.231	786.468	821.572	864.601	1405.07	1035.79	469.501			1028.52		1070.7	590.564	1269.08		1017.78	1076.69	1497.97	747.408	734.866	538.141	629.877		805.982		844.524		1122.23
AKR1B10																										6546.85					716.141
AKR1C2	1178.29	1472.11	1204	1625.57	1099.72	1458.22	1177.1	1604.17	809.119	1446.57	1543.87	1014.56	1321.57	1041.46	1658.13	937.588	1614.13	1571.71	311.139	1487.56	2162.99	1307.18	1228.67	1684.8	1162.78	2150.41	1594.27	1298.88	1378.1	1648.41	1132.21	1353.3	1764.32	1798.53	1061.74	1235.46	1101.52	1484.58	1630.64	1495.01	1231.76	970.669	1018.91	1378.02	1194.56	707.324	1627.92	1161.3	1365.39
AKR7A2	2655.33	3156.23	2027.56	2271.47	2365.86	3521.17	2031.42	3259.52	2380.97	2685.29	2452.96	2236.41	3180.72	2578.58	2180.6	3013.08	3176.44	3297.44	2774.57	2947.41	3093.3	2693.78	2898.86	3675.66	2781.1	3334.99	2573	2914.05	1765.48	1451.26	3232.6	2496.17	2272.68	2202.73	2117.65	3438.55	2698.9	3841.04	2691.69	3053.94	2555.77	3321.61	2514.16	2979.71	2583.85	1573.07	2796.77	1528.47	3075.64
AKT1	1988.41	1834.51	1382.74	1566.12	1418.07	1768.64	1685.96	1955.66	1724.88	1788.51	2144.41	1867.92	1462.47	1680.48	1953.01	1587.08	1917.21	1876.11	1801.5	1725.42	1407.25	2067.23	1650.14	1676.35	2172.51	860.153	1717.12	1717.24	2047.38	1262.74	1443.91	1911.51	1869.85	1547.42	2459.2	1497.41	1912.06	1902.8	1523.32	1646.57	1544.53	1726.93	1796.44	1679.39	1600.24	1586.59	1821.16	981.391	1588.28
AKT2	833.8	699.646	956.36	1196.97	950.848	987.723	1141.35	957.309	928.487	871.142	1282.51	1370.28	328.406	1097.57	1114.52	594.543	687.704	1384.6	959.296	1079.24	557.318	963.681	1359.7	884.206	923.706	1065.22	1090.57	1097.5	1194.77	1235.83	569.995	975.665	427.54	968.982	640.956	809.011	1482.71	794.862	938.998	784.784	1026.04	999.844	1372.84	1310.68	591.282		699.129	1062.01	1797.14
ALAD	782.778	1010.3			1036.2	596.595	675.701	643.53	1129.14	1045.8	1829.01	932.595	917.199	1603.58	1510.8	763.634	1234.65	1055.48	930.697	1510.97	1069.42	1245.06	1114.64	1009.56	1044.31	2312.87	934.062	724.308	1140.79		1046.98	904.97		799.049		1032	1202.54	1489.13	1004.82	924.273	732.385		1064.65	1214.06	1244.58	1088.47	1499.06		1218.45
ALB	5067.19	5155.3	4763.49	8178.34	6977.31	4390.35	5003.89	8818.76	4746.8	7123.51	6742.96	6536.66	5496.79	5192.42	6128.6	8869.54	5784.3	5057.37	6907.26	6245.02	5321.48	7414.34	4338.92	5664.84	7219.8	33079.9	7744.34	5507.38	6442.75	10620.4	5047.58	7397.42	4932.25	7424.66	7291.03	11213.5	7451.3	4927.62	5886.18	6195.46	5830.49	5541.56	5768.35	5544.23	5782.98	9397.2	5656.88	10002.9	5291.94
ALDH16A1	899.237	835.186		885.628	1092.02	1555.74	1249.61		736.075	884.109	1160.72			790.15	1189.33	1004.06		1066.79	1233.28	987.706	931.829	1163.58		1103.67	1345.47	1701.05		733.346	800.783		1073.5	1431.19	1152.95	942.808			1943.67	739.347	1161.29	1164.9	1320.75	1164.31	680.289	971.211	982.074		980.627	1714.86	828.015
ALDH18A1	9699.44	10170.5	9209.47	10419.1	10077.8	9645.67	10180.5	9885.09	9512.86	10252.2	9465.12	9623.86	10273.8	9913.82	10306.8	9399.52	9819.21	10013.7	9130.93	9092.9	8989.2	9093.61	10418.3	9946.99	10332.7	6400.28	9854.81	9319.17	9995.29	7858.76	8819.15	9990.73	9069.3	9994.12	9859.47	7305.48	9587.37	9554.35	9740.89	10444.7	9766.91	9386.67	8866.83	9774.83	9404.71	9389.49	9945.11	7924.05	9346.9
ALDH1A1																										4914.75																			900.426
ALDH1B1	1720.02	1846.68	1611.84	1303.57	1867.61	2106.03	1744.15	2507.48	2071.12	1882.31	2118.18	1768.79	2092.98	2023.46	1943.65	2096.65	1982.05	2232.26	2101.02	2088.27	1846.97	1620.62	1761.2	2178.71	1905.46	1373	1510.76	1943.93	1705.74	1251.04	1953.77	1385.33	1783.1	1897.48	1840.17		1880.99	1768.63	1574.19	1767.88	2227.43	2008.98	2097.1	1790.96	1627	1638.45	1757.11	1377.91	1982.5
ALDH2					878.603																					20133.9										3547.74												678.047
ALDH3A1	205.649				347.628																	543.457				4691.15										1176.91
ALDH3A2	759.37	795.987	564.372	492.849	655.599	407.798	1048.65		602.237	980.184	643.987	1486.06	840.495	693.095	805.753	835.38	1057.32	902.854	627.858	1104.36	813.797	891.255	744.941	1086.83	749.012	5582.28	919.747	627.053	840.901	1021.32	1078.49		1093.64	724.735	803.787	1898.52	959.294	787.599	1587.19	785.173	891.189	1161.04	722.44	574.446	1168.89		1085.07		955.522
ALDH4A1	2000	2355.63	2416.32	2126.87	2386.1	2021.89	2597.47	1953.04	2234.38	2056.2	1548.51	2163.39	2275.62	2243.07	2361.02	2265.13	2366.46	2494.33	2298.45	2120.25	2282.26	2287.71	2171.32	2360.18	2786.22	2299.78	1677.93	2273.87	1793.78	973.413	2444.82	2067.71	2125.26	2336.28	2413.05	986.703	2486.47	2638.92	1977.26	2607.01	1670.91	3116.02	2450.08	2388.64	2413.24		2452.42	682.351	2184.69
ALDH5A1	1726.93	2043.94	1977.29	2433.74	2218.31	2440.59	2292.11	1663.73	2014.13	1916.31	2098.54	1592.37	2655.75	1639.9	2244.02	1680.19	2194.89	2474.38	1995.37	1755.12	1733.9	1953.3	2609.52	2210.76	2197.63	2367.54	1179.34	1736.7	2019.61	766.607	2193.45	1190.17	1661.94	1509.7	1610.54	1548.09	1295.55	2423.1	1490.23	2210.46	2053.04	1640.49	2115.7	2372.18	1738.85	926.234	2002.43	908.971	1540.05
ALDH6A1	5793.17	5032.9	4738.4	5666.19	4955.94	5476.09	5453.25	5954.08	5350.34	5629.44	4440.49	5192.1	5514.57	5704.39	5101.33	4759.52	4956.1	5215.61	4412.65	4435.56	4974.22	4816.49	5395.97	4863.75	5049.98	4802.29	5848.14	4631.08	4936.21	3913.81	4988.28	5085.07	4534.61	5390.21	5441.17	4054.59	5510.14	5305.66	4748.47	5067.26	5269.2	4905.43	5063.81	6002.92	4916.68	5402.04	5254.36	2643.28	4332.8
ALDH7A1	4732.65	6268.79	5119.74	4921.95	4382.79	6031.52	3989.31	7134.22	5698.51	6310.38	5946.62	6303.3	6343.96	7479.95	7275.62	6017.9	6550.75	7806.59	6786.06	6651.03	6509.67	7451.81	6294.49	6919.28	5073.18	7856.31	5537.05	7093.95	5552	2286.01	6407.47	5722.21	6048.39	6964.63	5333	8776.25	5046.29	6684.89	5680.05	6308.46	5712.37	4989.92	6412.84	5414.88	6103.79	2255.05	6358.7	2654.22	6075.24
ALDH9A1	6536.02	10540.4	6039.59	9168.75	7979.17	10363.2	6378.28	9487.36	10261.1	9126.97	9728.45	8607.43	9400.2	10337.4	9962.14	10234.2	10663.5	10022.5	8605.2	9941.24	8428.3	10862.4	8967.62	9521.66	6782.01	13910	6311.64	7687	7527.92	8259.66	7170.15	8327.13	7341.49	7796.17	7752.03	8678.96	8342.58	7804.38	7188.69	8395.88	7003.1	7631.51	7527.37	7430.32	7626.99	8867.58	7242.99	8063.45	7661.2
ALDOA	66710.4	75392.1	49905.7	71513.9	66612	83380.6	51046.8	78246	73480.9	79799.6	80212.9	75683.5	78295.1	80472.7	85068.7	77299.9	84073.7	86344.2	77626	81019	74094.3	77727.9	86472.2	93591.1	74399.8	71071.1	71946.1	91974.9	77079	56176.3	72592.4	82706.1	71829	86279.6	74196.2	57348.2	77393.3	89771.3	77642.6	92154.2	84590.5	79178.4	79071.5	81145.2	80702.5	63625	75508.1	52463.9	88548.9
ALDOC	2566.71	3003.93	3209.19	3585.47	3324.89	3688.59	3108.48	3580.54	3167.61	3872.72	3636.62	3014.11	3683.73	3536.92	3778.08	3111.77	3767.2	3636.39	4059.29	3205.99	4004.82	3372.36	3345.93	2881.87	3245.84	3804.04	2816.28	3695.61	2956.28	2602.3	3281.64	2719.36	3188.29	2710.38	3474.23	3363.37	3085.98	3699.47	3191.85	4087.54	4125.86	3383.16	3576.42	3758.47	3279.06	2329.78	3108.6	1914.55	3536.12
ALG1	805.482	1217.88	978.725	699.834	1485.14	737.828	1146.79	686.577	965.641	577.705	724.126	865.339	1671.17	871.553	1098.05	845.36	815.233	935.903	1288.18	962.264	785.567	523.985	1047.9	768.755	832.057	920.681	1105.19	922.509	1259.72	916.156	1141.8	1116.59	750.522	1238.83	1186.26	1044.45	525.535	910.895	1106.69	1114.38	1233.04	995	1004.64	1185.95	1147.14	1205.49	1325.95	987.828	1206.52
ALG13	1143.13	791.763	1249.54	1191.01	1423.66	908.88	1512.5	922.641	965.753	1139.44	596.832	768.136		800.589	1032.42	1371.97	645.797	875.956	507.684	909.608	793.329	1229.13	746.258	930.381	1262.18	1322.64	570.294	938.409	1102.56		1010.54	887.252	911.744	880.767	1753.24	1853.3	1065.22	984.65	1060.11	1052.52	1253.61	1023	817.798	880.804	1500.22	1144.54	1017.23	948.878	1227.18
ALG2			1180.38		1534.36	1121.43	1436.74	1931.73	1968.79	1623.13		1149.23			1266.99	809.944	1462.31	1479.44	841.377	1380.93	2069.67	776.658	2152.61	1617.06		1668.96	849.469	1394.28			1644.91			1609.88	1524.91		1614.47	1058.22	1864.26		1083.21	1161.15	1608.87		813.422		1326.39		1808.07
ALG3	413.148	382.377	815.895	698.505	710.704	868.632	821.089	273.189	980.174	553.944	885.331	1398.27			1014.07	1108.38	543.086	600.817	617.463	853.534		427.047	511.989	335.503	802.442	404.515	752.146	326.097	1585.01	915.13	829.707	739.571	519.861	912.518	1281.64		272.963	554.113	324.492	410.305	635.543	855.395	628.73	1201.46	1097.25	534.526	1165.21	1711.4	1401.97
ALG5	1315.58	2093.95	2186.66	1946.09	1931.97	2292.36	2222.52	2203.24	2175.37	2389.77	1923.15	2101.85	1826.65	2470.82	1378.55	2761.03	1758.94	1972.64	2056.56	1972.7	2427.95	2000.14	1712.41	2006.45	2315.83	1771.77	2108.84	2240.11	2863.81	2160.93	1755.86	2186.27	1776.7	1937.28	2289.32	1642.7	2522.53	2092.25	2731.67	1604.75	2351.67	2225.93	2436.5	2135.22	2056.86	2717.85	2371.07	2555.15	2552.12
ALG6			730.337		908.944	566.254		517.35	586.891	490.021			646.024			890.977	832.665	303.502	571.485	363.507			756.254	587.125	1007.95	452.302	661.661		646.306		410.221		686.178	208.575	277.974		1028.39	441.779	593.749	323.777	490.496	612.238	1269.1	694.33	767.586	1239.59	812.904	1252.73	756.533
ALKBH4	2195	1784.52	1909.48	1732.75	1753.58	1646.01	1488.24	2403.55	2003.6	2273.54	1957.04	1535.82	1530.41	1405.1	2485.62	1899.56	2006.67	2001.9	2049.55	1716.86	1905.24	1577.49	1896.06	2125.2	2282.16		2474.77	2054.44	1687.86	1801.88	2124.75	1873.97	1924.73	1580.06	1600.63		1631.15	2037.19	1983.41	1359.06	2178.94	1527.05	1806.73	2161.65	1697.76		1583.35	1214.63	1867.29
ALKBH5	1200.42	566.261	1093.83	972.882	683.877	690.916	653.467	888.941	962.355	1090.41	785.431	1194.88	939.897	866.276	514.594	572.676	849.31	949.624	749.695	1235.78	708.13	754.816	1215.36	1057.33	1013.8		1018.44	642.25		734.079	1108.14	1398.83	1168.8	1031.91	1209.48	1435.83	1290.97	973.869	772.958	862.334		1791.8	848.168	925.866	1270.9	1917.15	812.823	731.031	735.271
ALOX12B		1235.91						807.229							502.59						1248.29		1534.05			14044										1953.26									2151.7		971.516
ALYREF								864.239	732.141	339.032	506.183					905.109	635.617		830.046						660.984	3686.14		593.099	850.937	813.211	1002.75		357.896						519.792							352.743
AMMECR1	961.794		1061.64	868.825		1957.07			818.306	1398.26			1513.81	814.75		1556.37		1220.96	1415.54		1347.11	725.053		940.29		876.869		937.241	643.152	1936.85	826.394	1053.05	1255.6		1411.57		1005.68		1032.2		1334.33	868.729		703.366	866.058	1500.87
AMPD2	1270.27		2080.94	1324.14	1027.92	1022.52	1631.28	1665.14	1492.59	892.206	1463.63	1459.55	1985.51	1497.47	1391.33		1477.81	1606.38	1682.35	1488.33	1945.41	2018.57	1897.34		985.442		1467.98	1832.11	1173.25		1132.2	1238.72	1348.92				1197.24	1436.07	1331.35	1469.39	1257.76	1476.44	1708.68		1187.57		1735.76		1577.26
AMZ2	2558.07	1748.66	2114.76	1872.73	1915.93	1753.23	1607.21	1902.94	1972.2	2150.75	2296.6	2157.93	1532.69	1644.56	2103.2	2182.74	1563.04	1347.7	1924.85	1130.12	1801.13	1904.71	1994.35	2294.78	2339.63		2113.68	1984.14	1832.02	2301.13	1513.36	1613.6	2618.43	2073.67	2117.89	1644.02	1889.17	1639.54	1641.47	2104.58	1875.95	2007.02	1921.29	2177.76	1361.13	1037.71	1692.13	2476.95	1867.27
ANAPC1	888.58	1149.24	992.92	1334.39	966.289	1167.11	924.021	752.015	1134.79	1194.86	971.303	1200.7	660.233	1194.65	875.793	1222.36	1063	865.252	1330.42	846.689	1875.86	1084.47	1313.41	1074.28	1081.39	1037.28	1346.82	1028.38	1039.21	1026.73	1332.28	880.451	900.346	1242.5	1015.22	1636.27	1039.42	1087.29	1151.49	1235.75	1194.4	1396.56	1505.64	661.672	909.523	1209.75	1020.25	1367.35	1032.35
ANAPC4	2182.02	1428.7	1861.76	1635.3	1788.71	2067.64	2524.89	1726.45	1686.15	1526.54	1755.94	1662.49	1918	1784.86	2038.66	1954.72	1626.65	1666.3	2145.57	1937.09	1781.45	1703.68	1725.96	1566.98	2162.24	1296.32	2215.48	1697.27	2128.38	2107.6	1944.79	1832.48	1743.76	1983.6	2048.98	2435.92	1938.06	1625.74	1795.98	1879.36	1659.87	1929.11	1844.51	1400.74	1900.21	1318.37	1972.72	1374.31	1493.85
ANK3	1259.7	810.026	860.782	843.12	977.916	927.678	1134.1	1042.79	795.203	1036.28	663.946	795.669	806.412	854.993	949.579	761.367	1078.2	806.996	1177.1	928.553	1098.69	971.384	890.224	895.992	557.169	1246.44	1077.28	865.756	950.223	788.52	772.061	636.847	470.829	986.234	1053.68	1170.82	1157.59	924.817	765.6	868.591	1422.27	842.57	1448.45	988.183	1027.84	655.98	936.732	786.085	1003.96
ANKFY1	2762.45	2508.08	2628.69	2930.95	2764.69	2833.08	3313.79	2427.26	2938.9	2987.33	2875.79	2491.17	3208.1	2726	2754.04	3086.3	2643.17	2421.88	2325.59	2701.99	2150.53	2675.06	2687.87	2429.11	2814.09	2493.38	2917.46	2849.81	3040.85	2245.5	2581.29	3105.44	2517.72	2744.44	2780.05	2422.48	2657.83	2851.09	2947.61	2892.5	3023.44	2838.08	2764.49	2560.77	2267.33	1928.88	2842.45	2260.06	2989.7
ANKHD1	679.313	699.44	808.326	554.984	1364.99	727.431		1188.62	706.749	709.172		439.36		969.531	450.759	570.762		397.251		836.959		741.977	532.904	525.722	300.505	763.1		466.267	740.393		748.548	661.778	725.717				782.146	793.231		526.994	337.115		1043.7	895.639					604.528
ANKRD17			269.196	303.631					319.314	340.588	573.439	406.588		358.392	308.525	278.555	363.421	330.38	503.74		685.451		90.3229	477.057					351.533			269.535	410.843				337.707	571.803	741.438	318.002	337.165	251.839		138.001	228.437		276.254	165.448	385.021
ANKRD27	1575.68	954.93	1312.34	674.362	1104.17	1174.96	1034.69	857.311	1089.33	1156.36	790.42	1136.89		1093.67	935.388	1082.82	902.208	1035.39	1446.05	942.208	1126.16	906.697	1063.25	1188.22		631.419	969.345	892.499		895.921	798.938	1192.97	723.942	1342.44	942.909		1206.91	902.338	1296.01	1475.04	1009.85	1261.73	1365.96	1076.37	1450.73	663.226	922.982	1315.65	1100.46
ANKRD28	1264.58	1440.53	1657.26	1599.46	1461.34	1460.84	1239.08	1880.81	1794.61	1491.06	1590.76	1578.95	1335.07	1393.5	1561.36	1786.62	1571.93	1246.82	1373.66	1386.97	1545.13	1396.88	1551.92	1520.03	1303.38	1451.85	1542.22	1368.31	1504.03	1512.58	1223.49	1732.94	1519.69	1696.49	1898.91	1587.81	1453.28	1337.36	1624.4	1549.78	1362.34	1722.07	1173.97	1252.98	1643.91	1643.23	1155.72	1823.48	1414.73
ANKRD50	714.534	715.595	989.52	841.157	701.461	868.495	955.661	1198.5	928.068	815.442	988.438	952.589	616.58	1010	1009.88	729.717	1121.77	659.21	633.229	846.581	1028.47	941.521	1142.81	844.918	923.74	834.911	1000.22	632.254	1023.05		747.173	1003.67	748.81	866.938	590.232	1007.7	1030.05	641.848	1003.02	925.192	799.203	669.274	966.705	866.779	1032.58	601.292	970.144	992.777	924.807
ANKRD52	1192.71	1094.75	2034.8	3040.47	1702.64	1710.43	1320.08	1471.26	1651.38	1585.76	2405.9	1672.17	2569.49	1780.92	1775.42	1537.88	1437.34	1985.84	2229.3	1690.31	1841.91	1670.47	1860.07	1319.48	1324.75	2003.79	1695.64	1502.77	1581.64	1139.1	1182.21	1771.57	1982.67	1831.48	2550.07	1234.49	1645.73	1386.25	1702.54	1354.19	2298.01	1871.75	1630.49	1961.65	1964.85	2343.71	1605.12	1630.8	1959.01
ANKS1A	621.636	699.739	398.659	477.149	687.539	896.146	776.169	704.794		1006.04	1336.97	562.62	556.68	474.075	534.17	658.162	812.033	527.592	613.179	538.899	722.691	657.338	1059.78	427.449	893.195	604.284	591.438	638.464		792.485	445.955	658.996	605.065	374.295	756.368		967.026	790.509	898.708	738.672	478.584		907.861	500.374	617.363		678.132	932.053
ANKZF1	1444.2	1435.08	1411.54	1517.91	1524.82	1269.66	1721.83	2483.8	1420.75	1166.08	1355.51	1116.38	1380.03	1234.34	1046.67	1655.68	1080.89	1354.81	941.579	820.606	1438.38	1092.04	1278.9	999.543	1658.07		1881.42	1266.8	1789.64		1243.41	1540.3	1370.9	1391.86	1206.6	1038.43	1217.7	1288.85	1315.1	879.829	1429.23	864.165	1171.75	1534.42	1180.12	557.54	1329.33	815.618	1306.53
ANO6	523.505	580.255	395.669		373.091	537.04		459.241	455.82	277.786	387.71		608.63	260.24	267.617	531.113	438.285	562.371				403.263		478.658		380.41	573.49		462.598			496.658	743.861	555.172				429.939	534.874		441.043	718.864	550.863	282.784	514.235	660.143			408.152
ANP32B	1266.69	1032.12	1356.87	1667.54	854.434	980.16	1866.43		1104.39	1255	1388.13	1809.11	2981.47	1871.4	1346.38	1866.39	1318.31	2613.51	1138.7	1611.41	1251.61	1084.38	2264.33	2059.8	2667.67	2365.84	1943.28	2096.2	2179.63		4463.16	1058.1	1703.17	1659.59	1003.6	1625.84	1981.4	1713.47	1573.29	1924.83	1325.95	1518.19	849.53	2641.41	1808.97	1022.4	1752.35		1783.11
ANP32E	774.008	980.318	954.832	813.771	908.352	678.6	685.982	1026.21	696.179	795.966	723.914	428.097	699.514	969.339	727.276	1010.29	511.397	618.823	639.453	650.331	462.214	701.426	962.847	788.007	1181	1450.33	773.103	594.785	657.726		1034.17	1084.79	893.925	515.802	350.671	1191.53	889.842	891.427	900.748	591.74	1147.33	957.976	612.449	804.724	674.265	951.58	684.554	882.123	894.273
ANXA1		329.312															7972.26			4379.28						63516.5						7241.56				4409.7											450.853
ANXA11	1572.48	1261.53	1767.75	1650.49	1738.97	1366.41	1762.18	1769.32	1546.2	1812.89	1715.95	1353.65	1557.54	1493.75	1989.7	2031.97	1331.01	2022.08	2089.86	1614.98	1886.2	1808.7	1425.28	1531.35	1564.2	7883.22	1857.76	1451.95	1854.81		1857.13	1259.42	1636.72	1232.84	1403.98	4009.36	1370.22	1567.33	1378.26	1314.1	1444.19	1640.55	1281.2	1591.09	1408.54		1861.97		1668
ANXA2	6032.79	5829.9	6699.58	4930.97	5735.33	5331.19	7720.22	2338.22	5497.67	6003.25	4673.35	4357.8	5143.03	5535.9	5477.89	3843.81	5780.17	6398.56	4868.63	4846.95	5295.68	5012.21	5123.47	5481.63	5563.54	45933.1	4744.55	5599.74	4695.57	743.296	6407.03	4481.73	5117.77	4673.74	3588.69	39836.5	5064.69	5595.01	4922.87	5307.67	6156.02	4859.2	4992.24	6905.44	8229.57	740.102	5848.7	2338.47	5215.93
ANXA3	1911.43	1542.08	1253.08	1451.01	1203.98	1587.72	2191.68	1852.39	1173.41	1282.19	1732.68	1163.26	1393.12	1612.04	1728.65		1838.06	1660.17	1288.92	1469.63	775.39	1590.26	1550.06	1303.66	1697.85	46633.2	1329.29	1997.76	2024.17		2040.25	1243.08		1348.42		10177.2	1864.57	1654.26	1169.82	1570.56	2305.14	1556.56	1322.6	1479.04	1443.42		1688.28		1334.11
ANXA4	4827.19	4026.82	4666.47	3613.27	4278.55	3768.64	4681.69	3471.71	3764.08	4276.51	3781.76	4917.3	4625.81	4724.73	4150.61	3455.8	3398.59	5089.04	4587.03	4255.56	3732.26	4134.28	3735.83	4448.56	4660.22	16674.3	4552.35	4751.35	4453.55		4449.04	3457.96	3845.04	3956.18	2990.52	10361.2	4540.76	3983.1	3937.94	4041.32	4241.41	4042.16	3865.16	4372.75	3814.74	1497.11	4554.88	1681.57	4141.5
ANXA5	11481.7	8896.46	10198.6	8198.28	10584.3	8530.75	12649	5449.74	10419.9	11120.1	9922.59	11589.8	11992.1	11917.7	12147.3	10094.7	11012.3	13516.5	11868.3	12665.1	10712.2	11188.3	10282.3	10666.6	12311.9	21814.7	14041.7	12257.3	12777.7	2825.24	12763.5	7906.35	12124.2	9106.64	8226.33	8885.81	13517.7	11277.1	10834.8	10048.2	10716.9	12326.4	8767.93	14809.8	11574.2	3450.83	12358.1	2563.38	11209.8
ANXA6	12134.8	8977.57	9845.53	8190	10825.2	8054.17	10991.8	8378.75	9914.54	9321.69	9871.97	9577.32	10183.1	10936.2	11550.9	9552.83	11485.9	11637.2	11129.9	10321.4	9700.15	11711.9	10684.2	11273.6	11305.4	12766.5	11439.3	10036.2	10883.1	2777.95	11227.2	6999.16	11496.9	8407.93	9236.46	2302.43	12061.5	10061.9	10796.9	10057.1	8896.67	9219.29	7720.81	11168.5	10048.9	3176.47	11119.8	2970.64	10733.2
ANXA7	6014.42	4444.35	5175.12	4653.14	4934.23	4227.52	5036.4	4343.63	5108.72	4769.06	4559.21	5442.6	5304.61	6135.07	6178.48	3760.69	5559.2	5962.99	4832.41	5355.95	4346.84	4969.24	5012.97	4792.26	5740.96	9592.53	5676.69	5669.02	5585.94	592.42	6321.32	4645.24	5789.31	4853.45	4190.15	5822.52	4603.27	5258.92	5598.7	4820.04	5078.36	4364.24	4693.44	5594.95	4641	1740.17	5226.95	1991.75	5036.15
ANXA8L1																										4570.18
ANXA9			182.81			966.193			243.02	610.737			363.053		249.621	811.671	1151.28	285.121			442.876					4766.25														1126.27				708.625
AP1B1	5287.59	6189.98	6893.47	6302.02	5694.95	6467.47	6599.67	6184.52	6003.87	7399.55	6907.85	6449.8	6517.1	6543.96	6477.61	5447.24	5395.08	6411.77	5953.35	6377.52	5254.95	5513.4	5227.05	5904.71	5788.92	5620.44	6877.5	5677.3	6077.66	2864.1	6536.94	6135.21	6180.39	5658.21	5709.98	4670.79	6288.85	6998.18	5342.99	6113.28	5709.05	7517.48	6063.53	5942.66	6180.47	4062.08	6455.54	4170.77	6567.44
AP1G1	9001.46	8978.64	8488.74	8956.05	8341.65	9611.27	9584.23	7445.53	8566.53	9688.05	9407.21	9526.71	8059.66	9787.98	8596.75	8412.41	8358.13	7953.55	9337.11	9093	4999.73	8008.91	8446.56	8115.15	9148.65	6773.35	10030.5	9205.07	9670.02	5575.56	9436.87	8583.62	9041.54	8415.67	9278.99	5901.04	8465.92	7908.61	8230.79	7854.94	10061.4	8786.53	9400.71	9385.17	8860.3	6300.44	9022.76	5335.66	8676.05
AP1G2	1221.33	905.395	977.64	998.058	1211.67	1070.62	1114.23	964.83	992.235	1058.22	1293.61	856.116	1075.3	1014.45	878.171	594.584	822.975	743.239	1523.7		890.461	840.198	1011.57	804.622	911.638	1928.99	1296.41	819.914	1451.71	946.392	1385.24	1096.34	1101.13		938.573	978.749	704.223	1096.13	561.569	636.804	1146.75	823.513	1131.45	1226.71	811.187	781.255	1002.92	1728.5	979.817
AP1M1	1866.96	2139.69	2053.99	2158.46	1863.23	1725.14	1713.56	1803.02	1952.32	2587.59	2341.7	2374.52	2146.13	1982.2	1947.63	2081.69	2035.89	2049.45	2032.02	2121.74	1332.6	1728.78	2229.07	2081.94	1947.82	1852.03	1855.67	2241.69	1723.29	1848.55	1726.01	2305.31	2529.24	1842.81	2145.6	2267.18	1976.99	1749.78	2254.42	1780.9	1678.85	2292.45	1882.54	1896.89	2367.12	2308.44	1982.63	2292.84	2390.89
AP1M2	8612.17	8853.24	9390.72	9105.12	10256.2	8702.08	8869.83	7199.61	9142.75	9920.52	8890.91	9758.36	8339.66	8563.22	9413.87	11713.5	8994.46	8440.29	8423.82	8070.68	7988.56	8382.23	8739.63	8925.81	9879.33	7945.39	9255.79	8691.46	8943.1	10065.9	8048.75	8659.67	9457.83	8456.72	9823.12	9333.01	8667.17	7512.4	8803.02	8438.23	8738.79	8223.03	9289.72	8237.11	10128.7	11625.6	8352.1	9321.03	8726.87
AP1S1	9440	7794.16	8977.46	7893.32	7817.57	7460.21	8654.63	7298.88	7480.06	6939.61	6508.85	7032.99	6976.6	8372.98	6650.68	7780.02	8009.03	7455.11	8437.63	7752.9	5774.07	7285.34	7274.67	7027.77	8422.35	7529.4	7981.33	8576.97	8192.38	4891.47	8196.98	7005.27	7846.28	8057.9	7787.42	5024.08	7486.29	7886.54	7556.34	7150.76	8580.49	7802.53	8402.06	8344.63	7571.62	7025.49	8089.65	7247.36	7797.38
AP2A1	5755.81	5572.66	5768.9	6015.37	5804.92	5695.36	5909.18	5206.48	5785.99	5960.2	5964.16	5344.04	5205.73	5508.83	5099.84	5528.14	5626.39	5422.96	5709.71	5528.87	5960.95	5578.89	5994.93	5697.51	5977.86	5677.39	5533.95	5664.76	5729.96	3693.67	5521.35	5327.34	5761.72	5546.12	5485.03	4552.19	5877.83	5617.12	6003.32	5628.04	5908.21	5709.97	6154.52	5476.38	5666.19	4738.45	6046.86	4151.72	5502.6
AP2A2	2827.3	3115.28	3226.08	2570.61	2573.8	3014.67	3336.99	2136.62	2748.42	3208.65	2755.93	3576.86	2558.84	3358.84	2812.79	2483	2893.5	2746.97	2522.97	3411.21	2093.6	2650.22	2313.8	2971.93	3949.84	3870.07	2763.22	2816.66	2639.24	2458.54	3058.67	2552.91	2607.89	2889.44	2929.32		2880.9	3202.01	2261.33	2800.96	3934.43	3084.27	2565.14	3103.7	2788.58	2298.59	3005.37	1963.6	2436.55
AP2B1	7368.23	7921	7733.03	8346.56	7760.18	7878.96	7609.13	7704.8	6540.51	8561.95	7347.6	6917.02	6932.19	7829.01	7508.2	7590.15	8508.91	7875.82	7499.32	7666.18	5445.02	8186.36	7651.04	8092.63	7212.03	5537.77	7314.57	7651.73	7166.76	6826.69	8160.61	6750.69	8791.71	7716.41	7523.12	6687.6	8205.84	8372.91	7823.41	7785.24	7779.08	7401.18	7865.67	8005.05	7762.52	7824.73	9605.96	7255.64	8238.43
AP2M1	9273.93	8025.71	8247.64	8003.09	8518.1	7965.71	7632.5	6332.67	9254.64	8656.42	9509.15	7508.6	7656.76	7895.13	7620.68	8275.66	8396.64	7831.41	9551.78	8207.67	7991.87	6423.94	8996.35	8075.35	8577.17	7658.39	8718.3	7732.91	9140.44	7009.19	7300.96	7761.75	9145.34	7863.8	7292.92	6497.88	7498.76	7373.03	9022.85	7337.11	8529.5	7388.85	8645.37	7340.2	7681.17	7474.27	8447.37	6276.32	8205.59
AP2S1	4118.02	3675.19	4982.41	3352.02	4279.03	4531.44	4137.3	3555.97	4149.46	4209.31	4534.47	4251.72	2699.17	4100.17	3203.47	4464.77	3625.11	3200.24	3909.16	3595.57	2048.62	3976.54	4266.83	3287.12	3745.71	6809.76	3623.55	4086.29	4235.94	4692.28	3274.28	4533.37	3817.13	4684.85	4608.98	2938.2	4627.39	3847.43	3664.44	3294.65	4652.07	4870.39	3858.18	4338.24	4085.01	5072.39	5191.69	4978.3	3043.72
AP3B1	4778.73	4827.5	4892.73	5110.48	5336.12	5153.94	4519.85	4470.57	5097.98	5155.29	4519.23	5513.91	5241.57	5596.48	5061.83	5552.97	5324.6	5205.66	4685.78	5399.77	3461.13	5162.93	4980.52	5355.13	4802.69	3933.59	5143.17	5472.4	5714.78	3591.12	5288.61	5306.91	5432.61	5558.16	5267.83	3957.59	5045.79	5393.61	5517.64	4519.11	5881.93	5558.78	5843.6	4848.55	5786.41	3867.65	5458.2	4042.51	5002.7
AP3D1	3540.27	2147.15	2348.46	1605.34	2087.2	2097.92	2423.19	2030.75	1843.15	1844.55	2052.53	1992.88	2145.37	1825.61	1935.6	1495.48	1666.36	2535.27	2221.86	2263.81	2135.2	1281.86	2146.05	1685.48	2559.46	2425.52	2149.95	2300.39	2319.55	1703.52	2745.53	2164.64	2047.82	2430.45	1702.25		1963.75	1875.78	1756.95	1348.9	1481.18	2082.35	2267.06	2504.1	2059.17	1816.17	2315.43	1532.2	1938.32
AP3M1	5689.7	4699.17	5362.79	3521.52	6767.19	4903.64	4192.76	3597.8	5254.84	5242.39	4870.71	4064.98	4305.24	4022.48	4248.67	4631.77	4486.31	4657.29	5427.29	4030.64	4297.1	4220.54	5159.2	4380.78	4910.13	4446.63	4719.87	4232.6	4854.84	3381.02	4825.57	4605.54	5105.39	4423.89	5075.83	3630.6	4039.5	4384.4	6379.53	4676.78	4851.1	5157.95	4196.59	3977.37	4411.25	3719.74	3795.63	3185.39	4731.24
AP3S1	1181.81	1318.16	2155.23	979.752	1975.6	1608.4	1647.82	2563.89	1417.65	1840.91	1163.31	1365.64	1494.35	1356.11	1436.32	2203.23	1343.53	1005.21	1352.59	1292.87	1576.4	1342.55	1684.57	1365.07	1282.78	1791.97	1104.77	1496.79	1221.83	2042.06	865.09	1808.85	1485.27	1221.35	1360.91	1577.61	1314.96	1201.16	1577.1	1846.9	1691.17	1461.48	1908.91	950.878	2018.95	1997.66	1656.41	1741.22	1785.29
AP4B1		527.911	158.61	514.863						157.689		407.409	304.195	373.174	394.2		315.529	197.166				310.482		314.732				466.3					282.812				529.86	436.129	284.74	336.073	617.503	234.119					366.379
AP4E1	1407.51	1619.87	1555.21	1549.06	1671.91	1577.54	1711.65	1372.64	1359.28	1428.27	2134.58	1729.64	1690.06	1667.78	1986.17	1682.98	1464.55	1545.71	1855.16	1523.97	1431	1425.69	1355.41	1357.68	1728.57	1649.51	1932.98	1778.31	1862.86	2245.56	1638.43	2128.87	1750.45	1524.1	1362.36	2617.41	1633.17	1249.32	1604.95	1118.92	1900.28	1891.77	1758.09	1862.5	2015.21	1849.05	1749.25	2187.08	1822.42
AP4M1	4558.49	3625.91	3732.88	3933.65	3141.6	3819.35	3833	2874.93	3250.59	4093.82	3291.35	3936.4	3405.9	3329.26	2778.98	2748.24	2979.51	3320.57	2306.36	3583.79	3892	3165.65	5042.58	4735.72	3106.34	2678.91	3217.67	3461.42	3939.16	2639.48	3960.84	3511.82	3862.84	2776.75	4291.54	3860.89	3128.48	3550.88	4426.75	4179.64	3542.92	3081.68	4137.52	4234.37	3539.88		2523.55	5162.84	3389.51
AP4S1	349.057	699.113	471.419	689.224	304.681	690.77	627.254		538.385		607.487		942.524	910.295	415.648	600.287	795.749	477.526	1243.06	876.543	980.942	975.961	1115.1	1226.63	701.664	700.478	499.795	617.703	872.044	1013.29	855.638	979.671	782.866	882.782	1242.77	1231.52	739.904	855.666	734.461	768.629	541.671	738.312	727.683	757.674	924.939	991.088	653.707	1366.89	670.383
APCS					349.331																					2959.6
APEH	2093.52	3498.88	1619.33	3129.59	2467.59	3980.28	2645.86	3827.02	3725.13	4527.45	4026.91	5190.19	4774.53	5194.89	4283.54	4410.78	3998.55	4116.66	4103.96	4423.37	2632.12	4380.55	3434.05	4013.82	3753.67	5233.92	4064.46	4310.42	4209.09	4183.52	3625.34	4951.38	3475.1	5137.86	4103.52	6107.71	2248.11	1822.77	3007.29	3969.55	3721.58	4380.17	3671.38	4411.62	4911.32	4536.43	4195.68	4131.64	3871.4
APEX1	5098.39	6911.33	3425.16	5721.5	5143.15	7851.71	4860.72	8119.39	6149.52	6491.11	6205.36	5723.65	6992.83	7300.46	6861.95	6678.61	6468.09	7119.1	5462.63	7829.17	6467.44	6917.53	7670.68	8034.42	5732.06	6613.97	5178.2	7257.43	6106.24	6196.25	5158.99	7210.87	5544.62	6557.56	6895.82	7120.14	6484.67	7869.17	6523.46	8902.7	6723.86	7990.46	6419.25	6341.38	7959.06	6605.86	6144.74	6478.18	6766.88
API5	1711.08	1479.91	1329.33	1592.46		1583.19	1618.78	1001.69	1519.05	1829.34	1701.11	1253.43	1387.14	2062.12	1845.58	1278.81	1729.92	1666.35	1767.72	2006.6	1285.88	1701.83	2222.39	1199.54	1342.01	2670.53	1550.11	1388.48	1983.15		1808.83	1276.5	1360.12	1112.43			1893.87	1665.9	1807.08	1657.33	1444.54			1647.19	1628.61		1297.97		1887.5
APLP2	1583.91	1245.33	1210.46	1711.36	951.821	1091.46	931.231	1276.03	1130.9	1187.41	1583.98	1278.49	1189.77	1049.86	1173.84	1444.71	1220.32	1303.65	1267.17	1481.73	1272.07	1470.17	1364.97	855.713	1272.83	1524.86	941.272	1135.68	1254.53	1543.97	945.846	1212.83	1368.5	1500.51	1437.41	1475.92	1374.59	1396.48	1452.63	1446.11	1206.58	1157.33	1480.13	1199.76	1015.09	1658.59	1192.48	1231.9	1453.36
APMAP	3837.54	4695.32	2484.54	4294.01	3475.81	4245.59	2977.77	3174.63	4923.31	5364.63	4891.76	5412.05	5400.1	5491.55	4719.26	5014.65	5134.02	5166.7	4243.31	5669.85	3762.88	5448.5	4802.44	5630.94	4362.7	12047.2	4852.55	6169.5	5110.92	4093.83	4767.97	5025.17	4519.18	5769.64	4522.97	5869.22	4031.85	5063.01	4302.66	4663.34	4671.31	5518.69	4527.98	5931.48	5638.81	4331.2	4383	3339	4843.34
APOA1								1185.43		1013.94																9496.09
APOA2										445.47																1330.74
APOD	793.367																									9894.26										23413.6									2813.78
APOH																										4833.56
APPL1	2035.96	1440.89	2115.77	1851.38	1532.28	1996.39	990.301	1003.89	1981.3	1152.49	1625.78	2175.01	1858.65	1742.43	1902.3	1902.79	1201.64	1943.33	1962.41	1937.52	1637.97	1586.84	2330.17	1838.59	1386.33	1410.68	1511.77	1519.34		2611.08	1560.58	2391.22	1826.53	1335.24	2077.73	2222.33	1927.38	1757.37	1987.62	1642.27	998.393	1561.39	1916.91	1933.29	1530.33	1701.32	1950.29	1804.96	1741.77
APRT	54256.7	56505.5	55892.4	62694.7	57650.2	53766.4	56602.1	77073.7	55532.9	56028.1	46836.2	51809.2	55219.6	54262.1	57555.4	52240.8	56110.9	56331.8	63140.9	49329.8	61403.9	50239.8	61973.9	58707.2	55039.5	53228	50513.8	56955.1	58540.5	31492.2	62199.4	63639.2	56951.1	61302.8	58266.3	35665.8	48219.9	60627.9	59867.3	61341.3	69082.3	59353.5	55768.1	65011.2	55677.2	36379.6	59838.3	29148.3	63027.6
AQR	2730.71	1696.89	1949.95	2593.89	1967.93	1579.56	2417.34	2321.47	2000.5	1662.31	2520.79	1926.51	1772.99	2022.9	2459.37	1813.78	1948.18	2260.66	2701.4	1836.12	1737.05	2524.06	2108.86	1670.11	2443.87	1868.84	1462.44	2732.65	2771.65	2267.88	1553.93	2653.55	2404	2392.4	2527.21	1427.88	1710.22	1952.97	2108.42	1919.36	2178.67	2846.61	2418.92	2340.48	2121.28	3360.23	1684.6		2142
ARAF	1876.75	1723.37	1259.71	1338.73	1779.92	1915.05	1707.43	1821.51	1586.54	1858.05	1388.02	1688.37	1585.39	1674.08	1590.85	2181.9	1718.06	1650.3	1430.64	1963.06	1942.31	2230.46	1869.98	1891.21	2112.23	2096.33	2211.73	1664.62	2060.21	2811.99	1618.21	2094.86	1723.99	1323.82	1313.74	2783.69	1560.33	1857.68	1704.04	1253.66	1858.55	2292.68	1597.47	1706.96	1889.9	1843.23	1373.99	1986.88	1806.86
ARAP1	1989.07	2056.88	1744.62	1977.85	1942.52	1775.16	1690.6	2231.95	1485.92	1643	1983.63	2445.41	2820.52	1477.38	1695.26	1951.85	1664.16	2220.82	2780.78	2143.7	2332.51	1900.65	1818.96	2260.79	1919.5	2664.69	2238.48	1425.95	2443.02	1640.7	1761.79	2432.11	1678.45	1988.89	2113.31	1489.95	2345.29	2015.05	1695.11	2238.92	2158.03	1417.13	1985.89	1526.75	2314.26	1625.94	2201.31	1727.46	1635
ARCN1	10408.1	11367.4	9506.87	10987.8	9966.65	10901.5	9095.92	9879.55	8828.42	9951.95	11562.7	11869.6	11278.7	11931.5	11009	11791.1	11293.5	10860.1	11366.1	10458.2	8989.44	10959.1	10796.6	10015.5	10571	10008.9	11218.4	9938.11	11111	11032.6	9996.35	11752.6	11754.6	11765.7	11389.7	11581.9	10617.5	10804.7	9407.3	9544.97	10491.4	11196.9	11623.6	10903	10735.2	11636.3	10984.6	11689.6	10989.2
ARF4	10944.6	12758.7	11419.7	13727.9	13708.6	11157.9	11740.7	10768.5	13586	12140.3	14178.8	14389.8	13897.3	13435	14058.5	16169.1	13417.4	13149.5	11559.6	14929	4347.09	14245.7	13130.1	12125	14984.9	16564.6	18642.8	13880.8	13891.2	18151.5	11948.8	15711.4	16855.6	13667.6	17705.8	18125.8	13465	11220.9	13874.6	10273.6	13029.3	17592.1	14427.6	13109.9	14160.6	19529.9	16410.3	17215.7	13330.3
ARF5	8023.73	12458.5	7416.13	9921.12	10024.7	10823	8019.47	9844.3	12811.5	11854.8	12067.4	11178.6	10841	13068.5	10975.5	12654.6	13119.4	12070.8	10462	12577.9	9949.65	13094.4	11355	12001.9	9793.56	10270.2	8827.74	10656.2	10965.4	12528.2	8907.84	12767.9	12520.4	11508	13020.8	12893.4	12815	12325.5	12964.7	10355.7	12256.5	11038.8	11626.8	9808.92	10658.7	11582.8	10531	11853.3	11707.8
ARF6	8947.42	12138.2	11066.4	12627.7	10814.4	11365.7	9456.06	9648.71	11100.3	11909.7	12789.5	14029.8	10312.6	13631.6	13407.9	15684	12221	10652.7	10956.8	11881.1	4972.68	12743.5	11050	12566.2	13067.4	15303	11387.7	11146.3	12742.9	14501.3	11702.7	13476.3	11764.9	13189.3	14360.3	13809.7	12044.8	10885.8	11286.3	10321	14234.7	14840.7	13569.1	12688.8	14639	15905.8	11927.9	16696.1	15056.2
ARFGAP1	1705.52	1521.02	1917.13	1574.96	1937.46	1370.78	1269.75		1236.28	1617.38	1732		1828.92	1538.59	1861.34	1460.33	1774.41	1608.37	1596.38	1293.61	1455.24	1577.52	1766.64	1466.89	1267.36		1942.89	1330.69	1827.52		1549.13	2299.88	1402.8	1112.3		1847.16	2319.29	1376.05	1545.96	1562.2	1244.02		1608	1161.38	1831.46		1890.01	2911.99	1738.44
ARFGAP2	3285.64	2562.61	3299.3	3022.91	2645.6	3067.69	3924.78	2593.26	2851.43	3465.88	3717.03	3368.23	3699.59	3872.56	2776.79	3498.2	2647.03	3101.34	3820	3261.87	3439.21	2873.97	3450.25	2754.15	3337.14	4555.29	2622.4	3389.22	3226.36	3054.64	2833.31	4429.65	3383.42	3744.22	3275.8	3133.41	3855.61	2885.05	3332.28	3118.46	3010.37	4157.7	3530.05	2488.36	2931.63	4231.53	3653.19	4429.75	3715.92
ARFGEF2			203.796	351.838	447.392			592.045		318.269	866.849	157.299		699.529		828.698	722.538	327.231		858.575	409.612	1273.93	636.821	776.262	649.176	909.839	260.323	765.418	259.441	1036.21	509.949	872.533	854.571	803.53	1071.51	788.51	957.786	429.296	328.398	628.677	700.44	1064.37	701.708	799.973		1513.63	640.514	839.566
ARFIP2	653.192	519.218	412.423	425.355		702.853	844.896		788.81	823.202	881.912	478.612	1219.02	1242.6	895.089	990.974	829.944	584.739		915.332	1099.65		529.818		685.603	757.636	860.133	375.161			1074.07	658.658	738.497	469.957	664.915		1116.38	846.991	756.492			811.264	446.341	784.491			512.37		906.24
ARG1	1697.5	1098.1		928.059	5820.05	1448.55	941.074			870.793	694.345			937.133	557.254		594.598		653.946	731.276	1125.32		1497.64			47829.4			611.865						1963.93	35448.1		348.28			325.872				8669.07	347.902	839.001		1527.57
ARHGAP1	4618.84	4925.26	5194.72	4263.16	5616.94	6100.6	4912.52	7118.77	4825.33	5748.62	4536.29	5889.79	5601.14	4798.45	5312.61	4743.48	5285.27	4646.37	4977.47	5363.53	5598.33	5419.46	6228.91	5729.7	5372.48	8763.97	4495.17	6468.77	4529.1	2650.07	5604.2	5791.81	7480.67	5541.77	4823.01	3521.02	6360.28	5835.47	6807.75	6070.92	6029.22	5156.55	5142.76	7201.66	4528.31	3229.66	5647.95	2321.09	5259.37
ARHGAP29				1829.13		1139.95	1227.76	2000.78	1814.28		2224.62	2494.45	1888.13	950.547	1461.45	2135.86	1692.03	1683.02	1287.12	1559.72				1354.85		2360.11	664.947	1081.33	1555.46		556.508						1656.17				2039.29	1901.87				2792.72			1116.38
ARHGAP35	1101.74	1401.85	1343.15	1263.27	1418.44	1628.74	1271.21	891.741	1135.57	1265.66	1586.87	1600.19	1346.31	1019.18	1418.71	1534.17	539.655	1413.12	1061.46	1195.9	1131.2	1608.84	1298.86	1010.11	1305.65	1453.63	1246.97	1066.89	1122.68		1040.59	1397.37	1233.83	1831.64	1176.23	1383.65	1020.57	1288.64	1236.42	1518.44	1084.21	1387.37	1306.64	1540.47	1303.94	1298.25	1059.48		1301.17
ARHGDIA	26301.9	32712.8	29565.7	29859.9	28948.9	37109.3	20070	27788.6	27700.2	29723.9	33319.9	27404.2	30765.7	28751.5	31916.4	30532.2	34179.7	29558.3	29920.4	34230.3	30217.6	36954.3	35430	35296.9	24082.4	33956.3	29609.4	32469.8	30090.8	30106.4	20371.5	33610.8	25700.1	35647.1	25606.8	29187.7	27000.1	32995.4	26767.5	31549.8	29217.8	27274.3	32000.2	23920.9	30647	23293.9	29817.2	36600.2	31176.7
ARHGEF1	2588.13	2481.75	2626.77	2851.07	2615.95	2654.62	2837.1	2358.38	2700.37	2053.9	2782.14	2148.5	2323.38	2796.29	2633.56	2158.73	2952.16	2556.21	2694.8	2374.09	3403.55	2322.99	2789	2815.15	2242.92	3063.44	2258.24	2629.27	2712.1	2029.34	2814.44	2894.01	2858.74	3073.63	2498.4	1853.27	2692.74	2633.85	2967.68	2959.93	2665.71	2407.56	2642.9	2518.18	2864.28	2264.72	2472.14	1956.02	3097.57
ARHGEF16	2152.35	1796.18	1645.44	2161.21	1976.06	2112.41	2033.3	2194.73	1918.91	1730.28	1848.83	1774.51	2369.82	1743.88	1941.7	2338.71	1666.4	2220.68	2452.3	1888.2	2375.51	2081.14	2088.83	2177.88	2359.61	1247.05	2007.4	1706.97	1880	1113.5	1841.09	2123.39	2083.83	1649.06	1891.05	3383.06	1891.72	2641.51	2100.98	1836.23	2814.26	2461.44	1684.77	2193.37	2237.06	1458.28	2630.01	1650.82	1722.71
ARHGEF5	1192.3	931.282	889.486	972.893	1270.07	953.252	1126.21	915.412	1265.78	1151.95	1196	1219.71	1648.86	837.268	1239.98	1102.46	1153.54	1214.51	1654.77	1320.01	749.248	1252.91	972.686	1163.67	1269.51	1311.17	1887.43	1144.06	1401.23	1032.14	1356.45	1384.9	1156.16	1674.04	1060.79	1133.47	1258.1	1061.25	905.496	1054.79	1028.45	1247.36	1471.57	999.663	899.072	1249.6	1701.2	1312.29	1231.01
ARID2	247.256	424.208	564.86	311.852	542.017	576.931	352.42		632.549		601.432	802.102	612.933		434.228	430.348	446.632	529.122	402.014	905.22	553.073	310.959	594.45	408.64	413.342	239.541	989.641	640.762	254.66	346.563	654.252	790.17	708.552	653.108	911.561		599.131	729.549	677.604	543.068	320.724	629.219	702.015	1046.85	668.38		679.875		627.164
ARL1	13095.7	14749.5	13486.5	13737.7	14801.6	13261.8	12426.9	11462	15002.7	15460.9	15275.2	14336.5	10007.7	13113.9	14822.7	16704.5	13874.5	12736.1	11019.1	13272.4	8079.74	13004.9	11132	14690.6	11759.3	13011.9	13257.6	15099.6	16165.9	14265.7	13183	17008.4	15244.5	14682.4	15296.1	13756.8	12957	13574.3	14845.1	13350.9	17153.7	15310	14865.6	15016.6	16020.4	19449.7	13831	16779.6	16150.8
ARL2	4977.7	4214.52	5589.71	4622.16	4501.97	5060.62	4891.57	4816.3	5217.45	5246.99	4267.44	4548.05	4441.1	4153.68	4317.54	4971.66	3982.94	4777.45	4990.78	4691.31	3722.62	4162.03	4658.11	4022.8	5090.91	3836.66	4803.61	4557.88	4659.56	3684.41	5463.12	4049.62	4613.68	3918.75	4375.68	2933.15	4123.46	4906.79	4042.25	4398.58	5559.96	4463	5079.29	4793.27	4375.66	3953.37	5052.62	3665.65	4835.02
ARL3	10818.2	8476.17	8606.35	8263.35	9173.14	9373	10388.4	10822.3	11078.1	9780.19	10803.4	10821	9712.08	10382.5	9722.7	9552.71	10583	9015.19	10835.7	10426.5	12029.4	10097.8	8447.08	9312.94	10449.9	8351.5	11232.5	10277.6	11641.8	7809.08	10532.6	10591.1	9398.59	10454.9	10563.9	7914.81	10995	11153.9	9326.81	9454.13	10151.7	10590.3	10881	11047.1	10166.6	10768.8	10821.6	10356.6	12009.1
ARL6IP4	720.547	853.936	701.226	953.495	1075.44	1180.74	585.457	588.54	881.972	1213.48	1144.69	1104.96	648.493	1019.3	1189.85	1054.79	454.299	1016.11	734.398	1085.53	1110.32	766.302	1022.64	993.941	1107.97	636.298	556.03	890.771	916.822	1955.91	716.716	1182.13	1274.23	1242.15	1248.39	1476.11	1023.29	1306.78	1491.36	1417	684.488	1403.58	794.066	922.424	1055.71	1716.11	1827.24	1722.58	1201.71
ARL6IP5	977.08	1611.61	1435.81	1562.63	1349.73	1517.56	1229.75	549.18	1736.53	1619.41	1402	1449.76	1610.82	1229.36	1926.27	1071.87	1695.37	1037.88	1425.32	1309.4	1177.66	1505.79	1367.39	1767.8	1344.24	2698.19	993.693	1506.06	1871.35	1404.21	1142.26	1068.43	1328.57	1150.17	1930.3	2004.09	1174.73	1150.22	639.064	1071.75	1155.24	1712.11	1711.26	949.706	1767.08	1700.99	1138.48	1355.75	1210.94
ARL8A	3646.03	4977.54	4973.38	5446.17	6476.1	4000.98	5932.51	2740.78	4024.06	3744.26	4633.89	4984.29	3322.95	4257.09	3616.79	5279.63	3300.62	2954.68	5386.9	4329.78	4541.3	4545.91	3751.9	3941.66	3788.99	5189.25	4285.95	4475.46	4532.97	3659.36	3730.02	3359.34	4435.67	4037.18	4105.39	3534.73	3151.89	2529.41	4532.04	4071.69	4322.31	4339.26	4670.91	3518.22	3689.57	3948.5	3557.68	2907.13	3706.43
ARL8B	4455.91	4529.8	4779.94	4861.49	4993.99	5562.09	3469.67	4504.81	4908.37	5846.72	5799.67	5808.19	5502.55	4749.11	5408.89	6061.7	4958.01	4127.65	4443.53	5651.61	3081.94	4744.65	4023.05	3960.99	4835.25	7848.18	4154.43	5549.41	4953.26	7034.13	5132.48	6455.64	4713.42	5052.04	5586.05	6279.81	5048.35	3955.46	3831.06	4443.84	5663.82	4433.69	5523.11	4160.77	6016.96	5800.09	5327.91	5705.81	5079.84
ARMC1	467.618	297.462	561.779	597.234	353.305		239.628	485.161	378.673	266.221				256.881	302.585		396.202	302.393	512.332	418.668		452.554		172.475				346.97	452.232		401.838	372.796	152.338					279.605	403.327	192.338	502.2		297.934		359.5		299.962		290.458
ARMC6	1136.3	841.035	1256.81	1261.73	1128.78	1081.52	1104.23	631.784	1054.86	1127.31	1046.62	672.19	1030.77	1190.3	858.807	1026.3	993.883	851.473	1273.36	1325.43	717.632	671.327	1260.21	816.356	1231.07		1043.5	1128.46	1299.56		1182.89	632.284	1017.25		1031.55	135.408	1025.59	1190.99	800.908	984.575	723.468	1679.98	1284.84	1543.02	1153.37		829.575		1373.25
ARMH3		800.294		665.623			604.412	940.843	424.831			804.867		669.357	1108.61		967.242	572.786	1041.34	311.158	536.293	839.937	686.599		793.509	536.255	772.82	673.585			1028.96	565.676		854.894	817.455			920.269	542.984	317.794	1006.55	474.88	713.107	970.904	772.794		525.134		804.326
ARMT1	4891.94	5428.94	4530.75	5817.97	5604.93	5164.47	4209.3	5688.5	6342.02	5258.14	4710.89	5021.45	3415.85	5805.54	4620.09	5243.33	5340.32	5007.1	4489.73	4489.77	3971.01	4833.98	5239.99	5299.89	4895.67	4185.02	4019.91	4534.25	4778.55	5540.29	4074.56	5204.14	5449.44	4836.87	6279.07	5673.92	5428.84	5549.14	5663.43	4709.84	6290.01	6310.92	4165.42	4214.57	4777.16	5469.82	4140.67	5115.36	5024.16
ARNT				550.001	1100.22				557.782			650.205	719.462	623.783	555.157		1025.72	605.18			545.106		1073.76	1397.41	1144.74		780.333	918.711	1000.22								774.548		926.189		701.128	873.518		843.177	697.058	627.655			934.977
ARPC1A	3951.66	3939.79	3889.29	4142.66	4007.21	3340.88	3582.89	3391.98	4335.96	3561.26	3965.91	5006.77	3838.82	3611.34	4657.76	4142.99	3915.28	2902.52	3725.53	3945.68	3537.31	3437.56	3091.13	4211.2	4760.65	9577.55	3357.48	4095.8	2976.26	4307.07	3376.95	4424.07	4884.51	3689.52	4906.92	4203.91	3721.25	3472.64	4496.92	3466.2	3230.31	4997.93	5656.73	3589.04	4531.43	3878.77	4473.38	3847.16	3998.12
ARPC1B	11234.9	7522.47	10089.2	10352.6	12201.6	9203.66	12591.4	8576.42	10249.2	10080.2	10347.9	10807.7	10059	9855.62	10827.6	11355.7	11272.7	9623.79	11444	8504.48	10220.3	10172.2	10578.3	9042.67	11167.9	11931.4	10967.4	9776.85	11820.7	11778.1	9535.73	10828.9	10625.4	9734.47	11095.6	10065.3	9745.73	7069.38	10050.8	10013.7	10976	10590.8	10303.5	9770.28	9341.79	12417	9498.44	12281.1	10294.4
ARPC2	15321.9	16605	14901	16053.5	16950.2	14791.9	13406.6	15227.3	16678.3	16444.7	16980.8	18342	16317.9	17346.5	17709	19827.8	17698.9	16052.3	16579.3	17748.7	13182.1	16735.2	16304	16969.2	17084.8	24212.3	16434.2	16609	18440.6	17583.9	16282.6	17288.1	16969.3	18423.6	18683.9	17492.6	17321.5	16486.9	18823.3	15731.5	16451.4	16928.2	16368.1	15518.6	18032.2	18965.6	16916.8	16444.3	16429.2
ARPC3	2911.37	4024.98	3424.91	4188.53	3374.36	4406.25	2189.42	5068.67	2811.09	3611.34	3199.28	2575.96	3074.48	3841.73	2856.58	1983.63	4129.4	3924.09	1731.23	2992.85	3519.73	4066.59	4735.05	5023.91	2980.39	13204.4	4425.99	3872.8	3396.47	1484.72	2853.67	3987.89	3268.85	4828.14	4332.25	3971.16	4933.79	4797.91	3789.55	4655.75	3058.63	3066.63	3443.26	3828.93	3969.35	2353.56	2937.56	1858.4	4749.82
ARPC4	21388.3	21943	21871.2	25234.5	23775	24557.2	24823.1	23489.8	23874.6	22807.9	22551.4	27966.6	23335.9	23998.4	25219.5	25939.5	22979.8	22083.9	23103.6	22837	12367.9	22720.5	24609.7	27124.4	25478	44295.1	25820.9	25638.4	24352.2	24036.6	22297.1	25303.7	25114.8	24639.3	26948.3	23861.4	25198.4	22780.3	22856	23224.3	23672.3	23593.6	24179.2	25145.5	26165.8	24536.3	24539.3	28118.7	24836.2
ARPC5	815.838	961.114	816.426	1132.67	937.125	565.603	1078.99	1143.69	1083.47	772.461	495.761	918.881	1027.69	907.286	1035	1047.3	1228.24	757.625	1264.95	999.333	892.768	1269.6	791.839	1055.64	1247.41	8135.51	1066.54	1101.82	912.67		948.799	534.832	679.416	831.042	801.007	1251.26	1136.71	662.176	762.286	770.65	1103.65		744.412	1068.58	891.227	445.268	1046.79		898.44
ARPC5L	612.569		745.121	1009.2	728.691	920.801	943.742	925.313	1278.82	630.196	927.65	570.997	1292.48	1230.32	904.849	906.016	830.828	630.41	1286.31		1136.83	1034.41	1335.91	992.632	1723.48	13510.9	1150.25	1349.85	1664.09		1286.22	1224.97	1308.56	642.576	976.006	1125.18	1500.52	896.376	763.024	1218.48		1329.9	1257.79	791.196	1209.29		850.476		917.133
ARRB1	3189.35	2850.13	2763.75	3582.09	2998.72	2888.51	2368.89	2514.52	2901.67	3209.29	3171.93	2665.96	2917.89	3403.96	3021.38	3771.24	2330.04	3600.9	3224.29	2940.23	3711.99	3749.41	3051.2	2656.49	3131.13	3718.13	3476.09	3668.03	2455.99	3085.47	2758.66	2912.93	2900.35	3034.52	2787.22	2788.39	3138.69	2433.27	2249.09	2987.97	3020.28	3422.52	3864.34	3170.02	3487.67	3433.62	2889.04	2834.08	3044.67
ARSF																										958.682										1002.52
ASAH1	1803.1	1472.06	1220.23	2056.2	1043.52	1755.95	1671.7	2457.2	1872.92	2011.43	1844.82	2021.1	2806.05	1692.07	1844.79	1987.82	1973.44	2394.64	1660.2	1930.26	1941.18	2137.98	2546.23	2012.64	1487.44	7569.2	1724.51	2088.53	2173.06	945.444	2427.82	1892	1738.36	2592.68	2105.06	14343.5	1581.47	2599.96	2066.76	2334.83	1916.41	2201.99	2134.59	1973.62	4258.04	2340.4	2215.17		2235.56
ASB3	464.564	463.451	1088.04	779.581	695.132	889.592	906.96	552.008	632.735	556.921	677.597	382.545	894.799	710.231	632.294	1042.26	533.51	740.728	674.055	954.372	820.627	506.374	934.779	719.232	643.969		355.609	642.505		1163.47	590.328	796.041	225.417	653.5	829.73	889.395	571.371	748.689	438.311	448.364	449.381	789.331	1038.43	705.793	1033.47	1448.22	815.773	817.474	574.158
ASB6					864.494		955.615										326.008				850.929					3327.63												164.417			1129.98
ASCC1	839.917	863.894	544.518	680.002		1501.55	615.089	847.082	870.591	1430.01	647.181	564.065	918.667	808.533	867.982	1289.5	1437.89	1043.71	919.384	742.142		866.256	1456.78	855.557	858.029	704.002	634.39	1282.28	935.648	895.433	1176.01	859.388	328.601	912.706			1000.96	652.155	717.825	1037.98	1014.41	1644.08	557.836	941.107	744.143	494.332	585.665		959.191
ASCC3	1954.38	1806.59	1794.35	2072.38	1730.18	1905.12	1874.38	1758.28	1904.13	1682.26	2078.2	1757.73	2061.15	1900.37	1853.22	2012	1853.95	1920.38	2128.18	1869.13	961.205	1482.49	1881.1	2039.42	1901.68	2233.36	1670.26	2055.59	2030.45	1932.1	1694.34	2247.68	1819.39	1891.43	2474.72	1924.19	2172.33	1678.54	1927.83	1899.88	1852.16	2021.65	1819.76	1943.14	2025.3	1665.98	1903.46	1505.65	1468.18
ASF1B		277.331		580.101	587.158	611.887	402.065	536.85	694.754	807.609	1000.6	616.257	450.1	532.457	608.91		680.157	703.371	287.758	766.675	528.792	870.991	655.94				627.401	681.165	513.683		528.859	617.314	436.871	1061.08	714.266		527.182	566.878	377.197	677.121	360.432	490.248	693.962	697.972	464.98		488.74		725.773
ASMTL	1755.69	1531.39	1937.18	1586.3	1599	1796.02	2279.57	2299.66	1576.79	1209.13	1281.19	1606.54	1221.9	1545.56	1704.17	1488.91	2007.67	1974.74	1468.48	1726.32	1565.52	1410.25	1361.55	1741.03	1532.53	1366.72	1569.69	1568.98	1054.2	1048.49	1647.88	2017.06	1546.21	1604.3	1439.08	1984.37	1734.9	1462.65	2037.61	2066.76	1417.4	1302.49	1457.54	1731.42	1825.03	1698.22	1099.47	1726.14	1475.66
ASNS	12080.5	11948.5	12318.4	12002.9	12024.7	12086	11511.2	11779.9	11318.5	11457.6	11406.3	10265.2	11253.3	11339.7	11552.4	11797.9	11929.1	11562.8	11771.7	11782.4	11118.1	11937.5	11826.7	12771	10648.1	8399.45	11004.7	10922	11252.6	10304.1	10738	11309.6	11474.8	11777	11624.3	10086.4	11439.7	12543.5	11122	11870.9	11046.1	11681.5	11924.1	10321	11147.3	10625.8	10635.9	9441.99	11899.6
ASPRV1															606.615		909.601			532.081						19484										4399.51									2519.74
ASPSCR1	1495.09	1489.88	1596.91	1121.07	1594.44	1355.62	1263.41	1823.12	1481.13	1818.95	1487.31	1360.26	1589.35	1611.83	1557.77	1334.45	1384.89	1485.83	1426.1	1449.43	1481.2	1581.85	1293.38	1681.05	1608.31	1524.11	1488.87	1749.58	1353.16	1247.51	1502.52	1341.29	1717.04	1229.83	1375.88	1044.52	1773.23	1466.92	1476.71	1931.36	1317.9	1065.22	1411.47	1529.66	1084.51	1853.34	1570.58	1558.45	1564.51
ASS1	25718.8	26682	27135	30038.7	26111.3	27003.1	26174.2	26755.1	25969	25198.6	26507.4	27845.5	29815.7	26860.8	28127.5	29319.2	27912.5	25050.7	28320.3	27020.6	25460.6	27785.5	30265.1	27733.7	28939.3	20010.3	28637.4	27878.6	28467.1	31087.7	26853.7	29574.4	29795.3	29506.4	32315.9	29915.9	26779.2	23494.2	30462	27340.7	27659.7	28136.3	28053.3	25756.3	27144.4	29038.5	27397.6	27887.2	27741.8
ATG101	392.842	551.691	617.283		907.941	536.069	831.432			550.733	409.9	424.743			622.77		624.306			526.94	485.838	589.415	530.126	745.715	637.886		570.627	582.211	403.131	773.009			662.653								187.183		606.88		569.721	995.522		356.782
ATG2B	845.713	634.399	840.535	755.287	962.426	914.724	891.864	968.529	896.954	474.849	553.795	1079.98	480.137	550.905	800.206	833.266		768.789	1054.76	830.953	530.41	746.753	744.794	752.79	946.805	1141.79	1248.95	1097.25	915.458	981.04	742.327		1157.91	887.727	978.966	619.159	649.096	1243.18	1184.44		380.067	872.135	1500.94	899.221	635.704	1163.81	547.16		887.012
ATG3	1001.48	1030.26	1004.5	1081.19	1079.81	861.485	734.668	984.396	1308.54	1122.19	1221.52	1115.96	1348.69	1405.3	969.379	1244.72	1278.31	1404.51	1685.47	1843.98	1379.16	1643.27	1362.94	1207.39	1147.82	2162.44	1347.2	1256.85	1397.02	666.72	1661.13	1237.89	1418.23	1398.38	1332.68	1083.75	1422.97	1112.59	1375.32	1312.42	950.54	1185.46	1187.71	1391.13	1947.53	380.194	1476.68	1018.84	1281.31
ATG4B	409.253	620.178	337.439		460.396	387.12		661.583	1019.78	529.342	598.169	461.037	342.015	531.488	321.625		464.453	626.968	285.254			499.822		438.199	554.128						475.54	477.1	826.08	412.107	475.633			392.165		781.344	900.892	640.081	142.809	485.249	257.533		352.772		659.959
ATG7	2687.53	2837.5	2884.63	3245.67	3050.43	2691.6	2611.94	3254.2	3199.73	3101.96	2895.95	3502.45	2923.56	2809.48	2896.46	2988.74	3045.68	2740.4	3084.15	2554.74	3331.21	3181.43	2780.63	2909	3022.8	3764.41	3030.97	3088.14	2953.6	2264.07	3121.76	2996.14	3378.28	3175.3	2780.22	2362.86	2748.92	2974.28	3018	2804.27	2977.2	3426.93	2958.82	3408.45	3334.18	2967.63	2831.56	2908.36	3470.93
ATG9A	697.838	1015.15	901.097	1240.65	1258.48	967.376	833.63	1302.06	823.56	869.313	581.021	875.488	715.776	1023.6	846.775	1532.75	841.82	835.806	1501.84	958.952	607.101	1394.15	702.66	642.198	728.261	1227.72		1220.15	1326.11	1379.65	1218.3	1657.41	1258.5	1069.54	1127.39		1169.09	880.548	856.7	983.799	688.166	1141.58	908.242	1096.39	1257.87	958.501	1374.8	1721.4	768.363
ATIC	41095.4	37335.6	38324.4	39767	41681.5	41504.9	39970.2	44429.7	42579.7	44092.6	42802.4	38538.6	40268.1	39905.8	40209.6	40203.6	41519.6	38213.6	43619.1	37011	43086.9	37166.7	41918.7	36839.4	44691.6	29291.5	38002.6	39942.6	38921.8	34487.1	37835.9	41285.9	38485.6	40803.7	40208.1	34450.3	35879.7	37838.9	38372.3	38118	43857.5	42951.7	41231.8	40451.2	38111.2	35568.2	38918.9	34504.3	40841
ATL2	413.82	426.041	904.891		370.205	277.878		1006.52	405.77			810.135		551.203	332.102			441.045				522.929	846.41	755.377			413.142	324.103	453.512		197.244			815.053	350.08		461.395	366.023	155.012	389.235				361.26		650.418			205.891
ATL3	1645.85	2412.27	2100.36	2363.05	1926.99	2525.78	1561.99	1679.78	1962.77	2416.67	1958.89	2048.62	2100.64	3028.63	2188.92	2315.26	2421.12	2363.48	1322.44	2275.81	1561.39	2324.47	2031.36	2487.29	1793.12	2639.01	1735.9	2095.66	2146.21	2146.79	2258.09	1086.95	1706.41	1623.96	1637.87	1973.53	1779.01	2024.87	1947.44	2147.66	2264.19	2132.75	1880.6	2166.62	2064.32	1700.14	1553.44	1152.22	2166.31
ATP11C	830.269	725.295	647.704			756.296	1175.51		1097.02	778.404	724.743			627.05		1019.44	598.517		803.93		858.041		795.314	947.121	756.668	831.048	741.843	523.633		823.762		607.73			766.847		967.329		792.632	517.418	867.696	946.847	679.341	633.363	1083.83	711.814	676.063	1096.08	918.529
ATP13A1	1078.42	950.104	1021.45	859.847	590.971	1016.25	862.067	1306	1013.02	1008.64	900.625	889.602	954.848	458.006	1579.87	1037.81	854.916	1154.65	951.729		1058.31		1282.51	853.552	1426.01	1417.41	1077.16		1013.29	705.545	850.775	1006.77	728.325	649.739	832.263	1280.44	861.091	1076.92	660.414	1005.37		1212.88	844.189	1315.56			980.364		705.172
ATP1A1	11171.6	10559.4	10731.4	9778.29	11118.9	10582.9	10662.6	10559.9	11041.4	11920.1	10202.6	9697.73	9721.85	10528.5	11296.3	9388.32	10780.8	11054.7	10477.4	11201.3	10456.1	10497.8	11081.5	10784.9	10443.4	5376.3	10702	11421.2	10301.3	4839.33	10686.7	9368.96	10627	9506.97	9871.63	6348.77	10862.2	11404.3	11027.5	10516.3	10591.6	10988.5	11176.4	10508.6	10895.8	6921.42	10566.6	5358.89	12230.8
ATP1A2	915.187		471.177	1206.32		1647.32	4843.77		5643.72	2561.69	915.085	1312.82	5878.76	2041.56	5835.26	1793.44		973.6	802.175	4869.47		2221.75			948.482	6191.15	6647.28	9839.63				1927.5			6532.89	3168.07	1264.91		1786.88	1203.8	1037.21		2104.96	1136.46	1041.34		5729.76	1265.48	863.528
ATP1B1	2127.38	3235	2928.43	3158.01	2720.51	3530.09	2010.61	3174.72	2307.08	3373.71	2896.55	2676	3351.27	3028.97	2704.78	3158.28	3208.82	2908.76	3602.65	2967.94	4176.49	3372.5	3499.23	4399.64	2920.28	5964.49	1475.36	3111.26	3053.9	1964.8	4445.78	3544.99	3036.25	3439.58	2201.67	5849.05	2806.97	4520.51	4488.37	4365.78	3100.02	3007.07	3606.02	3351.62	2939.96	2815.74	3613.21	2730.92	4001.08
ATP1B3	2608.46	2950.93	3282.47	3230.34	3321.58	3306.54	2852.51	2658.56	3455.66	3197.41	3187.55	3441.35	2592.12	2778.45	3252.94	2877.79	3263.15	3123.81	2660.38	3365.92	1973.73	3263.2	2875.39	3231.06	3360.93	2239.99	3518.55	3466.09	2833.3	2150.57	3481.96	2851.74	3716.92	2687.93	2896.34	2760.83	2895.41	3129.43	3556.36	2907.11	3543.71	3803.76	3086.66	3349.61	3671.62	1999.13	3238.75	3632.64	3628.01
ATP2A2	11347	10197.3	11219	10562	11017.2	10541.1	11899.9	11252.4	10828.8	10451.1	10684	12259.9	10783.7	11260.8	11611.6	11899.3	11182.2	10501	11467.3	10263.7	11294.2	10312.2	11177.3	10798.4	11627.4	12963.6	11125.8	11652.3	12213.4	10179.4	10666.9	12362.3	11926.8	10983.2	13199.9	11270.6	10058.4	10015.4	12186	11166.5	12657.1	12156.9	11751.2	11788	10673.7	11328.1	11461.4	10273	11614.2
ATP2A3	2372.5	3527.14	3261.9	3177.55	3127.22	3569.85	3363.72	3444.57	3074.4	2814.82	3979.68	2917.18	2727.14	2937.96	3102.04	2844.14	2148.13	2847.01	2950.6	3182.26	3081.73	3510.38	2509.49	3125.06	4061.85	4242.95	3198.01	3020.88	3174.82	2677.45	3245.94	2957.91	3037.95	3554.28	3854.67	3013.38	3730.94	3190.21	3695.9	3364.87	3379.16	2272.29	2935.56	2792.42	2771.02	2419.62	3073.99	2667.49	3564.19
ATP2B1	3451.36	3226.8	3094.88	3787.18	3172.89	3454.22	3604.1	3236.52	3053.48	3285.77	2496.98	3323.74	3286.45	3143.86	3200.22	2897.01	2972.03	2772	3120.47	3035.96	3817.67	2982.64	3631.58	2782.49	3614.78	1973.61	3287.05	3204.51	2983.99	2152.36	3123.22	2944.35	3366.06	3322.12	3325.43	2500.91	3679.31	3217.44	3520.08	2911.51	3280.04	3034.83	3180.96	2864.06	2936.39	2248.93	3327.62	3008.2	2999.62
ATP2B3	1324.97				1894.1	1183.56	1605.93	1638.49	1862.76	1566.49	1710.95	740.628	2115.02	1920.23	1249.77	1205.36		1759.83		1770.11				1381.43		1728.42	1167.11			766.682	1432.3		1452.41	1017.01	918.187	1386.6	1604.26	1825.87	1425.66	1918.93	1901.96	1207.58	2251.29	559.212	1204.83				2292.73
ATP2B4	980.188	578.397	1399.1	834.064	1037.12	1037.36	1041.59	847.981	739.146	1097.67	825.582	914.989	529.334	712.114	482.856	898.829	765.913	585.184	768.449	912.648	799.142	791.767	820.61	786.723	869.885	1022.28	1324.74	653.532	1344.3	927.235	679.635	639.935	496.228	749.376	944.603	1047.38	1072.98	711.103	1225.23	794.36	700.165	817.178	776.955	940.177	684.221		809.914	461.926	721.561
ATP2C1	1159.55	1166.57	755.48	786.914	817.653	884.946	754.911	670.281	921.079	818.699	737.059	883.084	868.306	798.747	875.338	873.421	670.592	736.378	820.72	707.153	870.042	1137.75	871.868	791.117	867.66	963.478	1214.99	1095.48	874.031	1071.55	952.164	1058.6	858.839	634.238	873.646	929.001	931.243	792.178	777.632	992.104	1147.94	866.754	655.428	834.492	753.044	744.194	654.674	552.682	1124.92
ATP5F1A	32304	30799.8	31451.7	30134.7	30508.3	30647.6	34230.1	36060.6	31650.3	30335.3	28752.3	27311.8	32588.2	31060.4	31884.4	26411.3	32583.3	31769.3	30217.8	28201.3	30364.2	28950.7	32890	31395.5	29385.4	42069.9	29421.3	31498.3	30639.8	16585.4	32378.7	28367.5	32353.2	30028.6	27731.2	25702.9	31523.7	32684.8	32776.3	33664.1	29759	29849.4	29803	31290.5	30305.8	22710.8	30926	18562.5	30823.7
ATP5F1B	28950.6	29871.6	30279.3	26430.3	27725.6	28800.8	30754.8	33612.9	25231.4	26062.9	24584	22877.9	28058.3	26970.8	28615.2	22057.4	27935.1	33463	25994.5	27133.2	28450.2	26251.1	30706.6	28895.6	23912.5	39774.3	25263.5	29082.7	26221.5	7734.9	30813.1	23909	26649.5	27276.8	21932.9	18421.9	26241.6	31708	30204.3	32023.2	27525.4	23859.7	26011.1	27081.7	26355.9	12819.1	27518.3	8438.18	27796.2
ATP5F1C	10004.4	8548.54	9100.13	8345.56	7906.06	8672.24	8656.94	8217.32	9602	8565.99	7106.87	7708.88	8737.09	7687.16	9599.93	7902.93	8226.86	7384.81	8136.7	7374.12	7883.47	7550.64	8483.22	7786.28	8020.74	9634.35	9619.09	8781.68	8433.82	7845.52	8889.3	8480.38	8867.15	8999.07	8186.47	7440.42	7975.71	8065.81	7529.59	8902.74	7653.63	8209.1	8479.4	9568.79	8881.95	6950	8867.25	5976.71	6956.65
ATP5F1D	612.753	1411.33	691.452	1465.47	1000.81	975.437	614.534	1676.87	1482.05	1162.96	1473.4	2022.42	1151.4	1434.06	1075.73	2562.16	1653.2	1910.2	2067.26	1150.18	1336.76	1623.61	1292.14	1811.19	1787.72	3329.41	1680.79	1408.03	983.889		2276.16	1345.21	848.562	1696.94	1670.75	2555.86	1546.77	1777.29	1256.62	1243.6	1362.61	1319.37	1841.1	1303.36	1034.62		1385.11		1480.41
ATP5ME	706.781		455.918		693.133	719.924	506.139				839.122			441.614	511.493	616.993		795.55	1344.14		956.413	752.12		803.642	910.929	5206.86			586.059		1014.49	456.059	695.438			1107.13	610.952		837.463	1091.27		449.017		1026.39	1211.57		1007.16	1170.05	663.54
ATP5MF	5564.79	4148.93	6386.45	4927.88	6047.81	4490.15	7287.88	3745.37	5447.24	5268.64	4245.2	3671.92	4374.78	5094.99	4599.36	4160.56	3471.42	3730.38	5114.7	4643.94	2257.85	2523.92	3796.48	2983.63	6004.24	7349.57	3894.98	2984.52	5798.31	2283.93	3841.47	5803.06	5257.87	4153.92	3893.04	3152.53	5077.98	4637.44	4143.47	3261.58	3542.91	4121.59	3685.46	3398.48	4717.91	2570.65	5544.26	3998.64	3212.4
ATP5MG	6621.4	7521.91	8033.58	7025.35	9048.22	8395.29	8486.56	5632.97	8161.6	8305.73	6061.27	5747.23	6328.42	5814.75	6025.41	7316.09	6216.03	7901.96	7492.28	7458.92	7716.33	7356.38	6413.97	9292.88	7206.57	12963.3	7711.5	6738.53	6104.53	5895.64	7014.06	8688.64	7692.88	7282.52	6352.65	8037.3	4202.95	8442.44	7345.16	9458.72	8048.25	9291.5	9417.88	8434.52	8811.82	6413.34	9377.61	6432.87	11790.3
ATP5MK	1590.13	1824.5	1417.2	1175.27	1776.18	2301.57	923.619	1116.15	2113.73	1406.32	1804.08	1386.51	1303.98	1371.41	1584.35	1690.99	1796.87	1372.55	1711.33	1877.34	1772.7	1566.26	1707.05	1437.45	1711.83	3498.57	2015.19	1380.37	1718.06	1864.09	1239.3	2223.41	1665.48	1722.72	2048.91	2034.95	1454.22	1553.97	1589.9	1139.55	1387.87	1896		1551.83	1956.77	2171.4	1542.13	2262.7	1497.84
ATP5PD				619.923		529.595			199.02	324.594		522.116	284.714		368.257		334.245	435.873	241.269	182.715	702.827	264.704	342.191		521.488	1350.73	477.665		483.419				468.779	359.914	322.366							727.141		268.066	528.936				359.746
ATP5PO	4145.73	3377.24	4075.41	3736.01	4190.83	3265.43	5044.55	3217.06	3752.22	3540.32	3214.62	3182.3	4080.93	3533.17	3492.79	3185.79	3050.31	3510.22	2779.98	3617.66	3238.29	3349.2	4200.42	3973.84	4280.43	11695.4	3612.2	4444.19	3394.73	1508.41	4079.57	2879.15	3157.66	2703.02	2447.73	4379.97	3509.65	3852.38	3549.12	3658.23	4049.53	4030.92	3476.65	4173.16	3057.36	1542.5	4299.69	1462.11	3040.32
ATP6V0A1	1860.28	1541.06	1403.18	1700.77	2068.37	1502.96	2009.59	1411.57	1681.78	1442.4	1749.63	1405.01	2090.7	1734.66	1216.61	1323.11	1414.9	1588.07	1786.35	1604	1794.68	1654.81	1937.05	1740.38	1368.46	4257.14	1830.08	1486.56	1419.36	1092.59	1797.86	1339.46	2302.18	1548.99	1678.99	2391.15	2079.99	1821.22	2317.4	1521.63	1239.14	1386.94	1701.04	1445.64	1776.78	1120.31	1971.18	1676.79	1836
ATP6V0D1	2600.27	2260.61	2350.54	2308.01	2617.86	2335.57	2595.24	2276.29	2997.51	2489.06	2423.35	2529.76	4338.55	4030.04	3074.78	2730.66	2127.32	3059.64	3588.43	2547.01	2835.47	2167.1	2990.89	2837.89	2907.88	4925.01	2898.82	2838.71	2898.45	1647.05	2048.81	2996.44	2871.85	3548.17	3810.03	3311.5	2612.19	2714.37	3479.11	2562.24	3143.11	2447.78	2601.64	2991.86	2550.78	1518.57	3322.63	1928.78	2726.69
ATP6V1A	3710.79	4000.21	4360.4	3931.43	4576.17	4280.69	3554.38	4203.38	3631.46	3794.59	3133.15	3491.57	3714.64	3826.49	4183.36	3874.19	3903.89	4390.25	3624.28	4230.77	3745.6	3836.98	4336.71	3904.75	2754.4	8821.95	3092.97	3814.15	4281.75	2712.7	3812.9	4563.04	3365.89	3603.53	3592.83	5527.16	4175.12	3879.69	3634.92	3388.46	3532.87	3981.99	3691.67	3887.23	3893.32	2730.18	3491.26	2869.33	4176.81
ATP6V1B2	2782.92	1912.84	2552.95	2535.94	2550.11	2643.63	2104.02	2299.86	2587.42	2098.34	2474.4	1904.71	2311.03	2239.09	2254.64	1626.81	2055.37	1971.55	1882.49	1839.51	2394.21	1788.39	2304.8	2169.89	2027.72	4881.42	2658.9	1827.24	2231.47	1755.8	2530.99	2048.97	2256.04	2568.82	2364.99	3710.72	1746.82	1626.37	2007.77	2559.6	2386.08	2086.09	2244.43	2713.96	2124.45	1772.29	1616.51	1592.83	2028.92
ATP6V1C1	2119.42	1909.5	2227.98	2222.3	2036.32	2569.77	2717.85	2002.15	2202.47	2603.31	2406.7	1612.46	2960.82	1854.77	1928.14	1603.93	1944.98	2322.92	2683.87	2356.92	1641.19	2437.1	2226.52	2052.24	2190.18		2407.51	2589.63	2610.32		2744.58	2937.09	1740.58	1546.74	2208.12		2720.56	2254.08	1794.41	2142.2	2446.93	2385.11	2698.24	2619.96	2118.94		2486.16	2507.2	2566.72
ATP6V1E1					1237.58																					4759.09						1200.5				1990.82									802.609
ATP6V1G1					147.983									370.293				299.316							324.949	7507			302.475		274.843					4183.48							183.777
ATP9A	918.189	616.479	572.769	612.03	585.736	760.597		726.19	370.342	669.547	1045.93		662.971	729.343	387.549	492.683	612.143	624.377	927.448	782.589		558.764	1210.42	1129.43	707.345	1023.13	703.34	638.161	603.344		468.516	586.464		691.206	652.927			606.36		750.019	284.378		297.4	825.926	794.913		531.759	1036.59	588.11
ATPAF2	246.268	646.859		551.804		560.749	1054.12	960.769	691.319	616.409			599.151	723.031	501.792	1197.08	591.63	678.916	718.181	992.943		908.636	743.917	905.035		667.262	913.836	1037.03	730.724		951.535	898.318	770.828	814.431			830.496	998.784	595.113	986.216	540.387	1200.82	918.776	709.082	824.923	977.518	1140.78		699.443
ATR		241.251	281.145	412.389	210.799									304.622	111.778																275.772		331.122
ATXN2L	2019.7	1734.21	1468.79	1441.97	2346.07	2030.81	1893.68	1548.7	2236.84	1579.24	2650.38	2159.44	1810.33	1814.09	2228.16	1627.71	2577.91	2266.89	2219.38	2152.7	1721.72	1911.44	1935.44	2563.98	1721.58		2435.04	1574.79	2547.05		2151.53	1618.76	1793.91	1985.4			2365.57	2490.75	2426.81	2092.23	2499.23	1460.5	1307.46	2455.21	2758.44		2043.07		2288.15
ATXN3	2212.29	2574.16	1956.84	2341.43	1639.94	2336.04	2213.25	1498.59	1770.87	2080.38	1917.14	2005.11	3203.56	2375.83	2524.06	2708.13	2543.31	2305.06	2673.09	2147.6	1640.64	2748.82	2276.35	2047.1	2398.34	3540.47	2351.43	2251.3	2515.35	1743.76	2192.17	2512.14	2337.67	3401.59	3369.67	3298.6	2951.59	1830.11	2559.18	2470.46	2241.42	2379.53	2788.62	2900.58	2567.86	2460.3	2642.81	3433.89	2902.8
ATXN7L3B		2234.52	1915.09	2684.26	1737.44	1746.4	1096.86	2358.84	2555.25	1683.76	1436.22	1612.24	2213.74	2213.19	2105.24	2165.92	1193.16	1518.44	2117.93	2358.89	1671.88	1733.8	1262.05	2074.64	2500.59		2114.06	1747.94	1794.11	2176.99	1647.86	1742.87	2231.35	1972.4	2508.67	2400.28	2073.34	2299.6		1410.48	1184.04	2614.63		1261.61	1917.09
AVL9	1057.46	1369.45	1003.13	883.262	976.801	1295.85	987.723	1292.8	1360.08	1217.43	1134.58	1552.11	572.049	1213.19	1072.98	1584.77	1118.67	942.356	1292.48	1268.8		1123.6	1317.2	1580.25	1231.51	913.234	1157.03	792.469	1124.43	1603.93	1534.99	721.257	1403.04	1243.58	1430.48	936.864	1027.97	1114.36	554.083	1917.85	1386.73	1482.59	1420.32	1445.74	1075.18	1156.31	1737.25	735.969	1071.65
AZGP1	778.486	794.664		521.968	943.869	407.84	364.864	677.765	269.774				1229.02		858.89	245.468	848.474	602.06		130.016	704.179	496.389	647.398	307.862		22136.8			839.554		628.025			981.991	1409.35	12058.8									6050.16		845.095		402.55
AZU1																										39263.2
BABAM2	1208.55	1174.41	1651.31	767.867	1631.12	997.828	1239.12	1089.84	1270.91	1064.29	1098		1591.41	730.739	1222.45	1378.27	756.125	791.274	1586.09	947.282	923.193	1266.93		538.935	1072.48	1277.15		593.355	1050.97	719.466	1424.59	1226.26	725.261					626.517	496.326	1096.28	525.629	832.75	691.264	1169.36	820.381		1390.5		391.433
BAG2	1090.04	1641.76	1024.14	829.563	1343.77	1153.71	1337.95	945.108	1072.18	1337.44	989.843	992.473	1678.71	1055.5	1295.02	887.42	1379.56	1595.15	1390.77	1614.83	910.913	1053.11	1101.72	1457.14	582.963		932.29	1356.14	1372.85		1831.43	1525.95	1037.3	1653.71	1051.27	563.362	1537.92	1922.55	1615.23	1327.66	976.853	840.911	1008.43	1421.95	1646.6	635.94	1278.51		1577.14
BAG3			1122.27	763.094	544.024		863.242	1144.57	1396.95		1068.91				393.859	631.963	674.594	659.622		626.77	1490.64	739.789	463.785	420.286	920.546	2591.71			681.398			1484.09		1347.7	1591.35	630.696	631.584		947.721			513.706	470.982	672.033	860.564	543.183			804.337
BAG6	5528.52	4634.2	6841.07	4388.7	5944.06	4263.91	5767.78	4380.11	4914.18	6096.28	5832.67	5012.44	6541.2	6512.27	3571.86	4557.04	5045.27	5827.11	5698.25	5566.1	3965.06	4997.8	5514.53	5662.67	6867.29	5162.96	4863.23	6640.33	5581.17		7006.51	5773.06	5893.8	4160.5	5185.23		5827.36	5252.29	4753.14	5156.04	6470.57	5146.96	5302.32	6073.73	4864.67	4069.38	5975.9		5170.29
BANF1	376.809	579.099		822.468	331.445	719.664	219.582	249.398		256.938					343.696					306.154	651.415	556.569	734.103	465.407			270.01	517.737	593.004			484.089	482.252	277.491		476.154	492.687	470.596	285.345	558.281	303.286		328.97	946.805	301.315	478.459			384.877
BAP1	4359.64	3896.03	3748.97	4220.97	4515.72	4094.19	4126.9	2873.62	4479.98	4637.1	5361.9	5452.1	3954.22	4540.8	4121.85	5348.75	4320.77	3482.18	4930.85	5025.05	4573.94	4192.87	3931.89	5089.96	4793.92	5019.32	4033.68	3834.63	4786.56	6430.72	3036.75	5737.43	4669.84	3980.73	5301.41	6675.36	4847.65	3364.65	4799.67	3791.34	4660.9	5656	5623.82	3600.55	5140.04	7403.53	4174.83	6457.54	4387.38
BAX	893.061		1128.7	1016.42	927.547	1034.33	982.015		1645.92	1224.83	613.274	473.637	2186.43	2250	1161.91	927.637	506.043		1051.2		731.463	511.488	582.196	551.103	1037.29	1747.58		712.982	1388.36		902.172	495.351	1119.85	811.992		703.82	357.493	686.893	1048.34	506.203	1126.81			459.106	448.238		349.845		457.866
BCAM	764.379	757.559	864.586	662.565	1002.84	1046.14		450.594	528.68	723.079	1665.54	793.555	1086.65	823.781	735.94	1122.8	720.886	755.821	858.913	957.801	720.234	971.656	1202.44	1029.34	882.574	397.943	1033.24	561.531	699.732	976.083	936.307	1063.37	881.307	767.208			956.141	686.023	650.05	476.569	959.226	575.549	969.59	931.406	822.278	439.87	1138.23	1091.46	1064.97
BCAP31	1984.38	2908.97	2113.15	2702.53	3248.55	3377.89	2781.7	1514.85	2406.77	2796.85	3032.26	2374.01	3199.09	2194.26	2553.64	1717.02	2552.24	2404.44	2693.96	2358.04	2117.13	1950.93	2202.21	2473.85	2434.91	11100.6	2929.56	1948.27	2656.18	1043.41	1938.99	1769.45	2364.49	1523.82		2797.61	2111.75	2278.84	2065.57	1777.63	1713.24	2139.36	1917.92	2084.22	2134.72	1828.45	3142.57		1775.44
BCAR1	2402.67	2035.59	2425.78	2376.49	2873.58	2892.4	2797.41	6373.89	2381.73	3063.66	2932.07	3499.92	2784.18	2549.73	2614.2	3665.91	2681.19	2565.95	2895.04	3345.97	2602.68	3182.81	2668.93	2426.73	3699.41	3611.87	3206.89	2963.3	2836.89	5066.17	2355.1	2961.78	3138.56	3307.97	3465.44	4788.07	3608.73	2793.48	3757.5	4176.04	2474.48	2788.77	2683.93	2064.53	2419.56	5472.17	2064.13	6317.11	2912.83
BCCIP	2719.14	2455.4	2696.77	2061.37	2224.1	2227.42	2089.68	3090.58	2436.4	2881.35	2015.88	2468.16	2435.92	2982.84	2621.93	2949.04	2301.54	2939.11	2317.12	2526.02	3034.85	2323.36	2398.53	2640.25	2987.06	1912.33	2867.4	2327.7	2679.16	1792.3	2650.23	2777.12	1996.17	2917.72	2596.51	1621.31	2523.95	2672.07	2412.77	2588.91	2782.35	2547.12	2426.05	2565.1	2377.78	1437.37	2380.13	1491.29	2819.32
BCKDHA	1720.71	1833.19	1891.45	2110.14	1466.42	2081.86	1867.07	1369.03	1947.06	1847.42	1971.76	1723.46	1935.4	1553.56	1251.97	2378.06	2119.22	1448.74	2985.45	2280.71	1833.49	1440.6	2125.53	756.506	1773.1		1537.68	1927.8	1943.42		1676.42	1775.27	2274.63	2159.51	2239.86	2546.95	2838.74	1375.94	1595.2	2086.73	1858.34	2165.06	2397.83	1996.67	2242.38	1852.04	2650.36	3088.11	1275.94
BCR	1231.16	1218.69	1959.53	998.971			1093.19	1503.01		1435.8		1678.11	1575.83	1165.12	1523.56				2051.39	1337.18		685.773		1014.94	1783.28	1553	1801.9		1381.17	1869.15			1809.1	1548.9	1219.33	1214.64	2566.3		1357.53	1368.34		1145.38					1337.33		785.727
BCS1L	1489.85	1145.41	1298.27	1688.74	1473.33	1333.95	1808.6	1648.35	1387.97	1620.03	1880.38	1843.75	1687.64	1474.1	1293.64	1719.08	1397.44	1107.98	1663.69	1234.89	1322.94	1288.88	1657.92	1560.12	2044.72	1829.89	1604.57	1459.15	1745.41	2026.12	970.346	1299.68	1539.48	1754.38	1818.69	1810.8	1905.85	1350.91	1556.03	1609.32	1511.5	1698.14	1342.07	1581.46	1422.16	2174.63	1948.13	1420.95	1328.14
BDH1	5142.83	5278.93	5309.63	4566.28	4423.48	5601.55	5715.29	5262.22	4837.76	4347.01	5348.88	4676.46	4835.73	4956.57	5457.45	5123.46	5055.35	5905.88	4504.25	4033.25	4151.02	4636.97	5553.91	4252.06	4085.6	5261.44	4513.2	5153.2	4476.15	2909.64	5108.28	4252.78	4842.96	5190.45	4416.93	3500.63	5084.99	4971.52	4353.51	5107.46	5581.52	4365.86	5212.06	5844.81	3952.75	2726.75	4463.43	2065.05	5107.85
BDH2	611.379	938.312	1001.13	721.779	864.877	1324.69	546.689	1363.74	1462.48	1234.16	1043.22	1525.04	1188.27	811.318	765.523	836.665	559.27	869.23	964.218	1018.32	657.177	866.617	1260.57	1285.15	533.634	941.839	762.932	422.224	1174.77	1194.16	818.734	566.552	647.049	1120.01	1270.06	364.889	618.134	615.167	511.181	667.692	983.709	805.813	1752.98	1263.18	1006.55	737.962	1555.61	708.166	1155.51
BIRC6	766.76	826.247	1163.42	708.42	769.522	821.087	678.21	630.578	794.346	823.034	583.555	713.252	1164.9	876.416	662.877	670.745	1066.19	923.208	713.946	934.04	945.609	679.445	1050.83	781.757	872.82	658.892	846.323	656.274	758.371		791.558	1129.83	866.633	981.786	856.145	782.141	718.539	789.826	915.827	696.102	700.187	761.476	702.122	639.977	648.952		834.683		1111.29
BLMH	2629.24	2778.82	920.37	2130.91	628.071	1218.61	2721.57	795.136	966.099	814.224	1554.12		1542.59		2593.65	1291.14	1365.06	849.695		4011.62	7772.21	904.507	5682.97	896.885		67703.6	896.215		2811.74		2255.74		1041.13	1228.97	4709.95	16236.8	1439.12	692.733	1740.16		1103.74	1061.02	970.16	2035.82	18325.6	1839.2			607.803
BLTP2	16321.4	6627.47	10674	7948.36	13612.1	9044.54	11423.8	11994.3	10110.9	8283.46	11250.1	9001.07	11798.3	6473.06	8106.47	7437.79	10668.6	7604.84	11332.1	7290.87	15418.4	7091.06	7436.08	6832.65	10591.9	6049.97	8641.98	6091.64	9083.47	9148.57	4287.53	6299.4	6034.24	6800.43	7758.94	9039.76	6902.92	5560.38	8212.18	11979.1	6374.79	4806.75	6544.63	3891.93	4378.45	5865.29	5779.01	6440.34	6467.05
BLVRA	21139.5	19458.1	19734.5	23343.6	19211	22035	22432.6	20622.9	20446.3	19670.3	22147.8	23984.5	22656.1	21724.2	21038.5	23548.1	19981.8	19608.6	23170	20495.5	18379	21909.4	22758.8	22627.1	22721.5	17206.5	22904.9	21539.6	24460.7	22685.8	19575.4	23482	21113.8	21877.5	26206.6	20799.9	22685	19448.4	21869.4	21253.8	23067.2	23066.9	24004	20889.2	20026.5	25003.5	21397.2	26494.3	19620
BLVRB	6960.82	8366.09	7556.25	7319.79	8087.6	7839.01	7743.55	2986	8800.49	9386.77	10561.4	10888.8	8862.87	8172.61	9498.15	9253.5	9131.37	8586.05	6782.39	8455.25	7343.36	9545.13	8426.65	8710.75	10244.8	9057.99	8966.82	8293.08	7774.03	7484.98	9746.97	7831.67	8053.24	8068.75	7983.33	8027.52	8087.96	7920.75	7758.94	7624.43	7368.51	8869.92	7991.98	10068.8	7800.48	8417.29	8167.46	7973.82	7669.29
BOLA2B	5663.4	5387.1	5261.05	5054.98	6198.88	5494.11	5735.81	4355.08	5931.48	5516.19	5360.28	6312.84	6905.51	6430.31	6461.33	6140.05	4989.55	6254.24	6046.36	5679.43	7391.05	5418.51	6101.59	6292.38	5810.96	5345.45	6175.07	5081.94	5992.11	6307.09	4918.46	5453.25	6521	5904.15	6368.51	6037.81	4990.93	4424.31	5783.14	5622.39	5670.48	6430.48	5401.65	5291.72	7171.94	6746.58	5828.89	6865.11	7224.49
BOP1	1729.69	1105.85	1539.42	1166.47	878.738	1582.26	1140.18	754.861	1139.25	1376.66	1175.38	1431.83	639.703	1186.8	1174.74	1355.56	901.822	1147.81	1074.87	906.335	1148.99	863.817	1240.47	749.18	2219.8	1665.58	1096.68	927.743	1056.55	1374.82	910.666	911.67	1168.13	873.534	1406.11	584.461	986.593	727.073	1088.47	844.602	945.741	688.746	982.012		1193.87	1167.81	903.573		1069.58
BPHL	2745.43	1996.85	1961.76	1965.21	2030.65	2587.93	2193.83	1872.11	1747.69	2363.04	2072.08	2486.69	1422.25	1932.03	2133.7	1839.08	1787.53	2301.06	1925.26	2497.56	1889.83	2215.83	2465.83	1635.11	2015.44	560.442	2167.2	2326.66	2188.77		2338.47	2455.57	2095.54	2189.51	2862.01	2511.06	2563.32	2100.3	2294.48	1737.06	1648.53	2010.46	1712.35	2629.29	2242.68	1783.03	2172.83	914.325	1894.87
BPI																										10534.7
BPIFA2	1270.2	986.305	1095.77					1458.03						1481.2			1474.8					617.558														2951.16
BPNT1	2562	3330.02	2427.49	2903.44	2685.57	2843.94	2610.18	2984.27	2512.68	2753.48	2462.54	2652.99	2613.14	2977.6	2952.68	2884.68	2688.61	2789.73	2507.78	3098.87	2917.03	2773.28	3136.98	2665.54	2490.08	2600.79	2607.35	3071.15	2760.37	2680.97	2509.04	2904.9	2507.14	2721.83	3005.94	3125.38	2491.51	3185.58	3219.5	3487.25	2804.72	2513.25	3073.28	2499.48	2956.28	2364.47	3009.18	2926.31	2922.93
BPTF	2030.8		3174.04	3199.57	2927.87	1367.49	4044.08	7765.95	4714.01	3593.16	2169.44	3691.21	3858.54	3353.95	2689.01	3289.13	3978.19	3391.14	3906.01	3272.98	2861.26	2390.77	4088		5111.79	6445.39	5104.53	2746.9	2334.38	5051.84	3738.41	5139.18	2927.94	5357.36	6031.32	4605.13	3811.09		4495.14	4239.56	5201.64	4981.36	2787.32	5303.88	4806.93	10420.3	3769.3	10875.4	2048.94
BRAT1	578.389	550.086	904.928	593.034	560.696	622.447	646.793		905.266	1530.9	432.568	575.736	1340.14	1323.01	688.036	658.026	664.743	668.597				894.023				641.353	781.369	549.45	598.34		962.977	639.437	1141.64		665.35		985.259	750.59			780.738		749.169	199.961			498.674
BRCC3	2906.28	2235.1	2322.2	2287.49	1882.11	2526.65	2121.2	2527.62	2393.93	2152.61	2309.23	2180.74	2979.53	2650.64	2219.44	2876.08	2462.78	1912.34	2104.16	2203.32	2101.04	1839.88	2459.92	2136.33	1696.71	2125.48	2231.32	2197.14	2206.52	2230.9	1983.92	2030.72	2432.64	1779.51	1943.58	2720	2844.08	2416.2	2475.11	2124.49	2251.37	2236.31	2187.94	1914.08	2591.52	2560.63	2387.66	2188.18	2080.65
BRIP1	1863.03	1296.27	1657.01	1038.45	1071.19	1910.59	1970.31	1872.63	1630.38	1628.03	1399.17		1145.19	1533.68	1692.08	1987.2	2256.38	1699.45	1399.58	989.394	1203.92	1171.9	1066.71	1476.64	1527.49		1356.62	2965.12	2844.29		1350.52	1149.39	1428.36	1389.34			1751.21	834.434	1021.63		1580.84	1368.05	1167.85	1387.62		591.054
BRK1																					164.272					1432.7										812.315
BSG		1439.01	656.335		845.153			1873.21	1212.85	572.725	1220.95	1521.97	1500.15	1780.07	492.254	867.273	893.249	772.086		1056.8	832.194	805.901	974.738	1326.15	1166.74		1535.48			775.506	1497.56	1079.75	1154.24	1557.56	1968.2	1581.6	2035.51	969.463	1435.18	1271.02	1045.69		959.774	1648.02			1800.86	1032.07	1894.39
BTAF1	1902.89	1699.29	2279.89	2407.84	1779.99	2607.86	1835.03	2167.31	1349.79	2624.67	2217.42	2090.34	1769.99	2367.89	1809.69	1821.87	1861.75	1599.68	2582.64	1738.81	1549.32	1974.1	2123.45	2107.83	2189.27	2509.97	2476.76	2218.92	2532.09		1952.22	2657.01	2369.3	1838.01	1743.34	2675.55	1695.52	1639.31	3546.45	1530.87	1345.66	2514.97	2890.12	2174.1	2161.14	1172.77	2633.24	2405.53	1608.5
BTF3	3617.49	3932.93	1846.47	2755.04	2424.03	3712.28	2718.58	3870.01	3307.91	4876.04	3449.15	2757.35	3436.68	3313.42	3792.67	4465.61	4394.39	4459.45	3785.52	2424.32	3704.52	2378.72	3835.64	2999.6	4018.12	4478.58	1756.24	3000.86	1824.1	968.826	1808.91	3691.03	2978.76	4116.62	2150.44	2520.19	2236.98	3771.59	3488.16	4813.48	3246.15	3970.83	2695.69	3265.53	1956.29	4153.58	2664.59	3384.25	3357.89
BUB3	12965.5	12718	12746.4	14883.3	14406.1	13572.9	11931.2	12334.1	14614.1	16434.2	16013.6	15266.7	14346.1	13851.8	15588.8	15727.3	15434.5	13495.2	14529	15658.1	11722.1	14629.2	14400.7	13523.1	14259.3	11087.2	13698.1	13220.4	14008.5	15994.7	11428.1	14982.6	12999.7	13760.8	15712.7	17468.6	13386.2	12209.9	13708.1	13256.6	16032.6	15334.8	14129	12887.8	13380	15888.9	14449	16248.8	12236.9
BUD31			335.018	224.732		240.113		438.262							220.436			211.386	452.541	385.177					372.014			380.043			303.131		295.73	204.723					332.462	368.604				271.117			384.279	172.62
BYSL	1610.42	2022.13	1680.78	1982.99	2193.09	2202.54	1557.86	2045.39	1959.91	1994.9	3117.22	2914.5		2288.42	1802.34	2937.66	1547.76	1821.25	2153.73		1525.71	2225.83	1945.8	2287.87	2273.35	1974.23	3117.96		2382.37		1403.01	3107.28	2038.37	1626.32	2472.39	2698.39	2555.43	1291.59	2029.93	1806.41	1731.45	2478.04	1940.31	710.775	1777.58	3242.71	1992.35	5183.95	2499.15
BZW1	1214.52	1001.31	1341.2	1048.98	1715.08	1033.72	1527.79		1773.16	1773.25	1526.37	2146.47	1871.26	1653.6	2053.39	1686.52	2108.9	1788.65	1851.1	1734.79	666.515	1903.22	1265.69	1369.08	2450.07	5785.95	2425.23	1520.65	1879.1		2060.63	1532.8	2155.56		1613.83	716.54	1998.48	1182.3	1393.77	507.033	1803.89	1848.49	1356.8	2762.19	2102.97		2053.06		1694.66
C11orf98	3787.04	1835.29	2084.01	1907.03	2075.19	2022.66	2044.51	1537	3171.54	1655.03	2199.2	1293.82	2738.12	1408.66	1933.17	1858.16	2066.38	3125.7	2938.4	2021.82	3002.45	979.883	2739.79	2136.02	2025.23	1957.37	2398.66	1873.57	2139.34	2620.89	2902.02	1745.17	2216.3	3430.79	3256.69	2421.52	3298.43	2187.77	2547.38	1847.16	1747.52	1769.36	2970.31	1396.66	2801.08	1585.76	3113.35	2135.18	1849.39
C12orf29							856.875																		903.218																	673.293					772.499
C17orf75		729.317	247.391	550.214		355.178	312.273	767.418	628.571	540.74	650.299	303.764		423.884	357.246		688.821		778.746	635.817		600.023	445.921	353.133	489.709	533.283	832.438	319.9	397.159		774.054	529.658	706.701	448.562	1068.1		517.863	671.39	519.392	359.987	781.526	669.209	679.933	560.347	1109.49		255.395		509.79
C1QA	73572.7	75777.5	70154.2	103707	90599.9	74447	75672.7	119041	87271.3	89406.8	103661	103068	90709.1	88981.6	81632.9	128505	100555	75636.3	102075	81044.1	106268	82340.9	78487	84051.1	90299.3	90246.4	89808.8	82067.6	91727.9	139471	57671.5	98458.6	87465.4	91591	104198	123778	75407.2	58830.4	97544.3	92468.3	75927.5	107156	83622.8	72346.1	81663.1	137841	77429.3	155744	77405.1
C1QB	72378.5	77690.5	79235.6	96780.1	84259.2	74270.9	56893.7	105791	68922.9	91989.5	107978	104985	79686.5	80920.8	76243.8	125136	89044	68555.1	81220	82887.7	43657.6	90717.5	76465.7	88295.4	99796.9	86534.8	80731.2	75774.3	93896.2	134253	57866.6	88228.5	91915.2	89281.3	103922	127086	82618	69613.6	85994.3	102026	92763.8	103384	71523.2	69800	78881.2	159710	66764.3	165404	77289.8
C1QBP	1057.13	1920.11	689.9	1798.84	848.947	1895.87	780.42	1330.3	976.443	782.777	1328.54	1789.1	1907.26	1852.59	1156	956.472	932.734	1731.27	1558.09	2491.61	2222.38	1816.92	2416.21	2535.31	821.389	1951.14	1136.77	1576.77	1285.9		2269.05	1504.62	1725.49	2139.42	1622.31	3118.33	2976.38	3105.53	1745.72	2388.56	1641.06	1570.39	1367.46	1340.44	1306.53	1460.19	1011.32	2252.96	1731.01
C1R	710.083	859.012	1110.79	1366.75	1019.04	1202.28	646.869	2829.03	752.525	1172.82	1207.01	1748.26	1472.46	970.203	880.741	1579.95	1359.68	720.796	828.339	790.876	705.289	1343.65	1208.56	809.612	1300.16	786.716	819.993	560.574	1353.94	2171.45	872.191	834.661	1019.5	1272.77	1709.92	1351.12	1258.98	1163.17	928.881	1219.66	893.763	1641.15	929.431	905.87	874.519	1888.54	801.172	1876.95	987.773
C20orf27	6473.8	8730.92	7834.81	9671.72	7844.84	8274.09	6530.23	5104.22	9351.27	9124.07	8681.34	9272.31	8164.45	8099.5	8717.7	11024.6	9999.89	8385.35	8027.59	8858.09	8310.4	8034.14	10730.8	8834.9	8336.38	7859.96	7058.11	7709.76	7476.63	7667.52	7016.28	7682.16	9305	8292.1	9869.81	9348.41	7932.81	6949.11	8795.93	7134.02	9320.49	7903.21	8250.16	6989.25	9633.22	11000.8	6488.63	10342.7	8797.79
C2CD5	1442.36	1259.32	1309.41	1524.35	1775.15	1301.89	1111.86	1319.07	994.585	1698.52	1203.17	1285.88	1098.59	1076.72	1006.12	1034.64	1172.42	1248.93	1049.12	1363.14	1392.21	1635.55	1132.5	1386.94	1142.43	1584.58	1412.01	1293.45	1387.3	1330.99	1126.35	1553.48	1151.36	1243.79	1304.38	1649.13	1449.08	1438.12	998.413	1259.15	1287.64	986.045	1379.02	1376.05	1067.12	780.059	1248.86	956.879	1199.72
C2orf69		1958.27				2874.64	3196.28		3638.83		2861.29	2449.42				3209.23			2739.13				3034.98		2247.76		3584.25	2607.78	2114.99						2125.13					3280.84					3805.67	2726.96			3556.57
C3	13093.9	12695.7	13668.9	18133.8	17156.4	14478.8	15775.1	21004.4	16999.4	16541.6	19385.8	21771.8	14824.9	14586.2	14594	22165.3	16383.4	12412.2	15200.3	15929	12379.3	17377.6	14206.7	16087.2	17029.6	28829.7	15893.9	15209.6	17927.6	27665.3	12182.4	19895.5	15804.8	16350.6	21955.9	26975.4	16083.9	10926.8	15664.7	17348.9	16122.3	18405.5	14296.2	13692.1	14795.5	24832.1	14371.5	30189	14337.9
C4A		2133.41	1401.49	1428.24	1804.37	1633.8	1878.25			2405.66	2688.09		2311.63	1117.02	1820.12	2808.85	1709.67	961.701	1416.38		497.153	2224.66	686.662	1159.61	2311.41	1212.14		1797.53	1981.99		921.295	2917.75	1774.7	2485.14	2508.35			1282.46	1264.1	2113.91	2724.42	1868.59	1371.8	1811.85	1975.75	3975.14	1686.11		1601.86
C5orf22	1221.66	1568.84	1531.43	1442.64	2019.54	2208.61	1250.62	1735.08	1701.6	2496.39	1709.66	2029.64	1698.64	1695.05	1203.05	1884.69	1972.32	1642.23	1667.3	1269.97	2071.59	1556.22	1613.14	1197.42	1318.23	1175.74	1437.02	1672.07	1492.06	1162.97	1485.29	1174.87	1339.89	1434.62	1450.67	1252.25	2001.36	1612.99	1593.49	1247.68	1224.07	1286.28	1874.66	1602.77	1793.86		1878.85	1182.47	1940.04
C8orf82	1846.32	1930.24	1837.4	1831.64	1682.53	2039.92	1681.71	1840.17	2223.85	1605.99	2227.56	1365.45	1787.02	1611.4	1436.15	1893.39	2000.79	2089.09	1537.7	1554.64	1451.4	1662.03	2477.19	2048.54	1856.15	1480.41	1578.89	2213.23	1440.81	2153.9	998.551	1730.6	1592.58	1892.79	1526.58	1756.56	2901.21	2331.45	1142.84	2030.36	1125.58	2102.74	1566.76	1707.49	1320.91	2835.57	1599.93	2059.48	2388.83
C9																										2857.15
C9orf64	5860.79	5631	5657.45	5576.29	5543.72	6279.77	5310.38	6271.32	6248.74	5603.81	5954.79	5721.93	5502.28	5705.98	5405.83	5993.94	5778.83	4941.32	4951.86	6267.52	3483.39	5675.04	5471.38	5904.4	5819.16	4411.42	5480.66	5384.85	5692.8	4940.6	5136.13	5469.35	5652.26	5289.09	5597.61	5002.32	5493.83	5178.82	5709.51	5735.8	5528.56	6069.66	6177.03	5210.64	4908.74	6022.98	5283.92	5777.07	6170.97
CA1																										709.777
CA12	4911.59	4636.02	4819.65	5215.96	4907.84	4091.53	3965.78	3886.93	4691.92	4210.37	4555.99	4026.29	3186.32	5033.2	4249.46	5121.8	4875.12	4948.92	4658.7	4121.02	4669.91	4608.5	4604.44	4766.88	5379.46	3492.96	5289.28	4319.74	4590.29	4006.14	3916.1	5029.63	4145.84	4722.65	5196.71	4160.83	4182.65	4030.54	4680.19	4845.62	4559.55	3762.97	4157.86	4795.56	3301.5	4378.96	4679.07	5195.09	4341.43
CA8	480.258	538.265	162.259			493.689	397.005		544.698	712.101		624.229	78.2237		632.193	515.366	632.691	654.754		361.826		582.581		570.68					328.148	825.348	240.688	681.889	595.251		447.509			390.692	345.214	496.388	221.19	606.829			320.431	457.479		1486.51
CACYBP	27518.7	27883.9	27272.1	30847	27689.6	29212.7	29125.9	27706.2	29448.6	29461.6	30847.4	29360.2	35207.6	29904.9	29822.2	35307.5	30696.5	27198.3	33405.4	28308.9	26610.3	31316.8	30761.3	28785.2	33554.1	24599	31090.3	31456.4	32395.8	31494.1	27919.5	32332.2	36088.9	31738.8	31052.9	34165.2	29482.4	28734.6	31663.7	24472.3	33195.5	33749.5	34619.2	31282.8	30355.1	34976.9	30943.9	31322.3	31517.8
CAD	10624.4	9664.09	10476.6	10653.4	10387.7	9979.58	10157.5	9958.23	9724.72	9816.1	10033	9525.79	10003.8	9941.08	10108.3	9529.32	10022.4	10049.3	10219.1	9871.6	8835.29	9967.77	10382.6	10429.8	9434.59	6845.68	10340.2	9440.11	10055.9	7738.3	9818.62	9761.69	10520.5	10296.1	10078.3	7733.23	9909.08	9638.87	9567.3	9627.93	10318.2	10094.4	10447.6	10034.3	10025.6	8671.35	10320.6	8652.94	10401.2
CALML3	869.676	1606.64									810.754		785.747		1366.66		3230.48	706.278	1536.86							50649.5						1439.74				36913.5									2778.24				509.27
CALML5															865.253		563.79	1158.85								48266.6								463.233		8453.5
CALR	2326.43	2676.05	2579.5	2579.96	2432.46	3512.49	2105.3	1366.39	2971.76	3051.56	3283.33	3616.72	4606.03	3671.02	3455.51	3218.58	3104.05	4028.99	2274.68	4133.49	2755.47	3988.22	2812.24	2793.24	2994.32	6256.42	2433.56	2797.07	3174.6	1639.81	3639.85	3622.63	3401.96	2813.66	2931.51	3350.13	2867.85	3149.55	2410.41	2125.44	2212.7	2438.89	2535.37	2494.13	2486.58	2889.93	1965.1	1953.86	2283.84
CALU			236.186																210.798							665.226					127.582		143.004				233.004
CAMK2D		408.619	427.779	372.621				170.463	564.759	462.293					370.609		738.969												306.182					640.17						597.733				425.542			328.559
CAMK2G	649.364	521.545	799.664	756.118	737.436	701.253	731.475	592.351	513.483	661.737	1233.87	650.947	734.021	573.436	535.695	511.559	591.76	666.019	937.291	529.205	426.895	897.269	982.66	971.637	989.289	441.505	430.88	842.802	1023.51	371.717	885.563	898.127	753.667	1155.54	827.66	761.956	1086.15	951.102	737.868	522.996	868.015	568.997	730.973	1332.59	744.725	1457.92	798.165		740.321
CAMP																										10522.4
CAND1	22945.5	20975.4	23116	20259.6	22549	21606	22354.6	16417.5	21743.9	24134.7	19765.9	21267.7	22207.7	25961	22951.6	19488.5	23355.2	24070.3	24775.5	23545.6	17388.1	22829	22560.5	21279.9	22308.7	12292.8	23633.6	24993.9	23949.7	3709.2	26569.1	17610.5	24620.7	21173.9	21382.5	4051.02	23875	24633	23749.6	20575.2	21867.4	21018.6	20683.6	25950.9	23265.3	7160.46	24767.9	4302.58	24806.4
CANT1	1374.91	1189.94	1611.71	2048.93	1412.35	1100.56	1096.73	1149.18	1663.9	1817.8	1980.35	1604.59	2300.65	1999.89	962.457	979.916	1359.71	1483.5	2016.16	1075.39	1692.32	1987.24	2020.69	1348.99	1625.46	2171.73	1107.34	2188.51	1160.35	2173.6	1250.59	1913.17	1953.34	1423.95	1289.4	1728.66	1534.47	1465.07	1007.61	1712.4	1510.13	3049.85	1987.09	1502.31	893.193	2094.89	1273.64	2328.74	1610.14
CANX	14900.1	16597.5	15058	14457.9	13803.6	13955.7	14917.5	16420.4	13228	15966.4	13390.4	11048.7	16355.3	14465.8	14448.4	13212.3	13794.3	16195.9	12713.8	14706	16255.5	14151.2	13859.7	15492.1	14248.7	25925	13017.7	15758	14601.9	4435.13	17034	13076.6	17715.9	14750.9	13084.4	8214.93	14352.6	18506.7	14843	16365	14568.2	13885.1	13538.9	15286.5	13753.2	7528.22	15621.6	5260.76	15498.8
CAP1	6082.82	6278.95	5047.47	6456.89	5387.64	6665.76	4944.81	5024.65	7516.51	6578.62	7229.8	7832.8	6966.94	7771.86	6726.92	7208.71	7198.23	7138.29	7314.7	7282.67	6664.04	7085.15	5739.3	7449.9	6067.23	15418.3	5585.77	5862.04	6576.2	5340.93	5319.13	6715.68	6507.02	6601.35	6362.64	6792.8	7004.64	5637	6083.68	5948.3	6125.09	6440.19	6338.53	7161.08	6700.3	5993.58	7772.66	5339.84	6725.94
CAP2	6398.22	7362.24	5743.63	7788.86	6049.14	7778.74	5753.45	6720.98	9477.07	10674.9	8717.35	10599.5	10457.2	11997.4	9604.62	10772.3	9292.5	9064.74	9552.53	10123.2	8199.36	10047.5	8504.88	9965.24	8422.26	6211.17	7913.08	9172.42	7360.31	10331.4	7094.72	9339.82	8653.07	10053.4	8156.12	9491.05	9118.78	8447.42	8557.7	8567.2	8254.28	9311.7	9002.93	7967.36	8101.84	8147.6	8663.54	8102.36	9376.65
CAPG																										12274.1										1731.01
CAPN1	10375.2	11173	9259.28	12981.4	11775.5	12184.2	10731.5	13246.4	12273.2	12812.7	12039	13454.4	12536.8	13585.3	13020.1	12363.8	12585.6	12092.5	13606.3	13843.5	12255.8	13484.7	13350.3	12615.1	13105.5	26005.1	13001.5	12544.2	12122.3	10832.1	13337.4	13984.9	11706.7	14137	13066.4	18167.2	12798.9	12630.6	11791.7	12773.7	12727.4	13337.2	12105	12799.9	15160.6	11744.7	13559.2	11382.3	13550.8
CAPN7	1233.73	1129.62	1007.98	1267.24	1434.04	1315.78	1493.25	1442.58	1249.98	1609.95	1248.06	1588.48	1390.87	1543.72	1574.33	1355.23	1277.85	1013.1	1148.73	1711.3	1084.47	1388.38	1436.82	1487.8	1894.07	1436.11	1424.01	1483.07	1834.7	1581.31	1537.75	1540.06	1281.16	1044.24	1451.28	1910.36	1415.93	1526.65	1358.36	1474.11	1572.36	1530.09	1864.68	1909.53	1320.27	1113.72	1374.05	1344.28	1554.11
CAPNS1	2394.35	1750.81	1331.1	1217.41				2458.73	1567.26	2734.46		2130.78	1799.12	1392.31		1719.93		1596.53	2370.64		2085.39		1248.52	1502.73		8893.86		1515.79	1558.97		1788.74					4658.28	1644.31			2329.48	1958.2	3006.47	1417.94	1301.54	2010.15		1103.83		1407.52
CAPNS2																										7196.68										4979.92									1015.89
CAPRIN1	1456.31	1258.41	1675.15	1407.7	1637.67	1325.27	1654.47	2319.98	1260.16	1860.8	1271.84	1408.39	1358.2	1635.37	2382.05	1255.94	1522	1648.03	2057.05	1294.58	1780.75	1867.06	1777.39	1527.6	1840.51	3511.86	1429.51	1623.6	1663.44	1351.49	2434.39	1662.19	1071.31	2016.01			1821.14	1608.69	2069.36	2063.11	1664.94	1340.78	1667.03	1705.21	1606.67		1146.85		2032.65
CAPZA1	11472.3	12021.5	11842.4	12601.7	12640.5	12698	12951.1	10676.7	14483.6	12030.9	10581.4	12451	11134.5	11405.6	12185.4	12938.7	12474.2	11101.4	11690.2	11878.3	7075.08	12277.5	12894.7	12213.8	11434.1	17364	12193	11362.6	10631.8	11503.8	11083.2	12941.2	12112.6	11708.8	11519.4	14547.9	12094.8	11633.3	13590.1	13051.8	13277.5	13400.1	11916.9	11848.1	12351	11354.8	11700.4	10466.9	12797.1
CAPZA2	5248.98	5923.31	6516.37	5999.66	6986.17	6597.59	5106.16	4596.77	7089.25	7115.15	6682.48	7475.13	5344.15	5804.99	6818.22	6619.12	6563.84	4150.34	4933.82	6823.77	2036.59	6431.23	4010.34	5577.78	6909.7	5246.29	7187.78	5224.28	5647.57	6885.28	6432.49	6968.06	6292.84	6071.16	7027.95	5326.69	6689.14	5753.83	5653.28	4977.03	6422.17	7384.14	6081.15	5419.44	6548.58	7324.91	6224.79	6985.72	6692.47
CAPZB	19386.6	20824.2	20217.8	23990.8	21923.8	24969.2	22359.7	20874.5	20054.9	22083.8	26905.3	24139.6	21323.2	23973.5	22883.9	24332.9	24807	21887.8	21973.5	21944.5	24995.7	25377.8	23567.9	26283.6	19381.9	28231.9	24316.2	22108.1	22156.2	24324.5	20886.1	24933.9	24905.7	22696.1	24010.9	29085.9	23331.7	19835.5	26042.6	23141.4	23174	24332.2	21185.5	18847.5	21625.2	27684.4	21956.3	29474.5	24175.7
CARD18																										1357.58										6291.23
CARHSP1	256.357		547.599		139.778	216.744	435.451			524.194		502.464	316.563	434.738	526.016	755.672	411.172	385.163		402.931	505.18	250.111		581.298		4176.2	487.351		253.372		538.929	311.8	139.882	423.875	374.289		481.168	245.546	540.533	602.687	299.908			699.979	594.759		339.466		222.319
CARM1	8045.94	8254.74	7585.25	10127.9	8532.5	8319.41	7149.95	7711.71	8172.1	8235.14	8946.12	9104.18	7368.52	8600.59	8385.59	8985.33	8274.64	7536.95	8024.51	7839.17	5712.23	8449.44	7176.27	8246.91	8919.09	8098.48	7871.59	8022.98	8549.2	9474.41	7378.77	8521.72	8862.24	7421.75	9429.66	8590.04	8348.19	7398.98	7675.21	7969.1	9002.42	9272.67	9395.63	8276.24	8888.11	9871.89	8086.33	9505.85	7643.31
CARMIL1									282.17
CARS1	2488.11	2339.82	2589.37	2330.83	2060.11	2035.97	2092.58	1970.12	2091.22	2518.28	2179.71	2031.41	2071.03	1868.21	1907.33	2207.13	2332.38	2218.15	2243.47	2291.31	2079.72	2204.31	1972.09	2209.45	1800.79	2700.97	1815.62	2331.29	2528.06	1297.76	2263.89	1909.38	2193.74	1934.83	2014.51	1687.44	2349.92	2378.12	1987.56	2340.08	2000.78	2016.51	1900.71	2078.92	1976.97	1574.3	2049.25	2217.65	2185.73
CASP14	1252.73	1117.72								692.522			699.261		1074.65		711.55		1706.37	1027.57			1131.65	1456.27		15016			786.508		772.267			379.216	1736.78	13873.2									6889.59		1308.88
CASP6	7452.3	8837.13	6625.5	9582.71	8767.36	8252.11	7911.23	9608.19	9514.83	8982.8	10564.6	10989.3	9801.14	10094.6	7232.53	8747.33	9412.41	9325.43	8659.97	9821.29	9142.06	8552.62	7366.46	9168.96	9438.83	6869.82	11203.7	9517.05	10687.6	7800.38	9905.62	11488.2	10293.5	9311.02	8135.63	11779.3	10848.4	8563.63	7841	7987.72	9638.25	9309.4	8410.35	8266.35	11763.9	13670.7	10278.8	11426.4	10041.1
CASP7	2920.99	2307.66	1879.43	2634.08	2455.33	2095.02	2493.89	2567.63	2330.21	2625.38	3283.91	2401.08	2110.55	3047.51	2827.28	2750.88	2629.04	3353.29	3608.76	3052.82	2371.38	2282.13	2500.06	2679.54	2038.84	2626.57	2240.96	3145.5	3816.97	1820.19	3056.49	2694.14	3319.19	3595.79	1850.11	2161.34	1845.36	3064.55	2966.51	2248.74	3309.97	2188.39	1950.68	3470.98	2292.21	3210.58	2526.44	2935.35	2702.58
CASP8	1122.66	1610.59	1412.15		1343.9	1151.5	1028.84	755.529	1157.88	1209.85	849.329	770.144	634.521	854.429	866.25	966.034	1080.52	1280.62	1229.49	1191.41	961.452	1081.42	1294.85		970.261		950.552	1123.66	1081.22		1201.61	1389.76	2713.43	1024.04	1311.26		1026.04	842.835	683.357	1076.77	1079.7	680.44	769.291	888.522	971.076	696.542	820.477		905.405
CASTOR2	1168.86	1455.04	1713.19	1237.97	1710.86	1058.03	1326.66	614.008	1286.68	950.42	1269.14	1872.69	1126.04	1112.42	902.759	1479.55	902.153	804.513	716.499	1096.26		1202.66	684.239	729.887	981.778	879.567	1505.89	597.244	1476.71	841.33	1562.45	1291.98	999.262	1002.34	1375.51	1878.39	1343.64	1011.94	704.963	617.275	711.959	1451	1142.75	1111.13	1757.35	1757.29	1859.83	2089.33	943.795
CAT	281.628	907.554	1013.39						483.865	466.594	564.927			548.703	644.83			1029.36	589.403	1495.83	768.298		776.145		657.702	10818.6		407.137		521.826	846.194	572.916		697.087	355.441	3302.76			501.796					1003.71	1947.01	851.904	575.297		708.911
CBR1	9125.63	7749	9041.98	7609.97	8000.63	7777.89	8649.8	9522.03	7526.94	8834.69	6105.71	5626.1	7427.62	7407.26	7725.58	6626.51	7954.12	8065.1	6419.68	7202.26	7503.42	5983.26	7894.24	7670.93	6725.26	6384.9	6461.89	7585.12	7349.23	5025.2	8027.8	7276.21	7713.15	7078.69	7199.08	4047.05	7414.01	7860.65	8233.8	9279.76	7730.69	8169.82	7613.37	7913.11	7762.62	4817.22	7166.71	4374.13	8303.38
CBR4	862.262	850.984	1378.22	748.94	1147.06	1085.2	1306.49	1183.9	1024.9	743.255	1028.01		932.854	1130.66	316.224	816.931	1252.4	1148.35	1462.29	1167.45	1090.19	862.823	1299.69	952.56	1139.35	1841.5	1233.01	1037.15	841.714	979.398	1411.91	849.112	567.151	1094.1		879.571	870.913	672.458	1079.01	1074.22	930.171	814.769	940.766	1367.72	672.378	1326.51	945.788	1102.26	1148.81
CBS	8769.7	8741.29	9666.29	7979.27	8209.32	8764.3	8773	10077.1	8180.48	7973.58	7893.72	7482.58	7389.57	8439.55	8182.06	6493.56	7276.32	7814.68	7847.61	7036.53	7942.75	8676.23	7482.21	7545.12	7857.7	3508.43	7498.1	9188.62	7892.56	4882.52	7755.85	7576.84	7943.72	8590.21	6575.84	3445.94	7550.67	8891.49	8270.54	8529.3	8718.95	8217.21	8674.54	9265.84	8755	4866.34	7221.73	4364.3	7895.32
CBX3			327.49			364.78		761.445	373.483					330.443		390.01					177.573	70.5437	350.735		248.456	437.7		84.0814	307.179		160.404							355.192		214.534				544.768		919.502
CC2D1A	2591.19	2749.56	2580.37	2460.86	3377.69	2618.05	2426.28	2456.11	2852.8	2727.64	2536.13	2721.01	2329.39	2878.25	2320.65	2538.43	2729.84	2617.51	3127.11	2574.43	2726.56	2697.26	3446.37	2461.89	2763.08	3790.15	2593.99	2992.29	2703.37	1887.79	2934.41	2741.26	3090.53	2448.88	2768.9	2197.77	2514.15	2644.26	2367.98	2356.64	2109.84	2032.89	2555.42	2311.8	2578.23	1464.92	2543.41	1951.27	2745.3
CCAR1	1730.86	1163.92	1039.55	1234.22	1500.8	1584.03	1203.7	1373.73	1377.45	604.932	954.109	1405.18	1524.32	1002.1	1684.64	1542.48	1388.1	1711.47	979.581	1383.94	1365.37	975.684	1413.22	899.711	1415.77	976.69	712.209	1073.91	1508.57	878.556	1602.14	1063.75	1607.38	1505.68	1118.06	2319.6	1501.86	1230.7	1610.28	1572.84	1126.38	683.698	1259.88	843.921	1520.14	849.941	1635.55		1609.48
CCAR2	8638	7750.39	7570.72	6755.53	7087.81	7880.59	7873.28	6888.45	7493.46	8186.44	7337.69	6233.76	7750.15	7253.93	7594.19	6196.8	7351.61	7958.45	7542.46	7916.6	9507.97	6898.78	8099.87	7457.81	7290.71	5265.65	7076.78	7983.63	7085.17	3030.65	8716.97	7204.26	7881.99	7911.98	6289.09	4847.47	6972.54	8622.47	7283.57	7914.63	7333.26	6821.49	7859.07	8253.69	7284.22	3457.3	8522.67	2900.48	8131.01
CCDC150																797.046			900.937
CCDC25		655.412	615.074	1090.35	393.012	412.788	597.601	939.294	513.256	677.125	473.758	690.766	630.451	763.416	274.263	425.109	724.277	504.622	438.778	544.863	708.397	412.285	282.019		879.899	246.925	417.497	444.783	433.775		654.427	258.969	661.616	467.771	694.152		385.997	662.462	641.705	488.31	580.715			184.577	390.713	519.22	614.384	510.755	737.922
CCDC47	2256.83	1840.6	2077.28	2006.24	2091.56	2664.47	2095.38	1865.92	2059.18	1951.84	1916.95	1120.99	1476.02	1595.52	2000.96	1515.65	2044.26	2162.49	2018.79	1524.25	1975.22	1831.35	2012.27	1802.52	2436.91	2819.55	2481.51	1681.84	1688.55		2158.85	1884.87	2350.27	2668.63	2072.41	978.151	1663.95	1745.16	2699.25	2116.6	2037.75	1653.37	2090.87	1794.23	2103.21		2127.58		2121.51
CCDC6	965.058	1173.6	1575.97	980.796	1494.83	1238.44	1024.64	798.691	1018.8	1539.76	789.893	1021.76	815.893	1291.59	1342.84	1083.2	1477.41	1504.38	906.302	1020.21	1293.8	1601.97	871.941	1211.84	801.759	2039.37	1313.35	1516.89	1305.8		1554.02	1094.51	1157.46	1410.7	943.311	633.525	1202.03	1662.9	1115.46	1679.42	1055.44	1394.32	1356.49	1440.57	1388.98	1190.89	1293.21		1703.59
CCNH			320.86															252.811						179.697														228.478						209.767			352.651
CCNK	213.632		449.369	426.158	492.193	302.794	211.734	785.651	720.017		465.334							437.738			1542.04		1269.82	1166.16				318.217						440.736				692.97	2996.4	1220.46	385.361	411.717							997.144
CCNT1	2245.25	2059.7	2118.84	2015.79	1624.55	2236.11	1723.38	1294.53	2194.87	1563.76	2525.77	1988.34	2441.39	2086.75	1954.36	2601.97	1577.34	1644.44	1973.06	1693.85	1781.35	1914.87	1447.57	1297.64	1833.87		1823.79	2148.42	1752.04		2070.91	1505.75	1235.16	1756.87	2155.05	1114.6	1647.72	1695.04	1969.98	2219.38	2179.73	1402.91	2188.54	1594.45	1219.16	1837.87	1741.43	2824.16	2241.97
CCT2	15022.3	14550.9	15153.2	12384.3	13905.4	13444.7	14160.7	14578.7	13143.1	13696.7	11824.6	10420.6	13199.5	13355.3	14175.5	11293.8	12951.5	16124	12761.4	13621.5	13036.9	12713.3	14427.3	14093.9	13588.5	7433.8	12095.7	12830.3	13233.6	3243.93	14063.2	10697.1	12725.9	11866.2	10222.2	3551.61	14180.5	16254.2	14438.3	15037.2	13713	13045.3	11065	13103.5	12739.8	3757.79	13345.2	3248.26	13764.3
CCT3	21182.4	19743.1	20397.4	16431	19877.5	18899.7	23280.3	15298.3	17846.1	18072	16453.8	17530.9	21552.7	19878.9	20090.1	15013.5	18486.1	23016.8	21287.6	19612.4	17768.9	18687.2	20197.9	19798.4	20006.9	15104.1	20861.6	21899.1	20418.3	4121.54	24771.1	15089.6	20265.4	19542.8	16042.6	6377.84	20857.8	20365.3	19435.6	17888.8	17847.1	16407.2	16951.1	23505.8	19703.4	6870.82	20831.7	4858.63	20737.6
CCT4	19696.6	19946.5	20577.3	18307.2	21155.7	20430.1	21175.9	21264.6	17942	19825.5	17472.3	16113.7	17542.8	18210.8	19697.7	15047.2	17685.3	20666.7	18717.6	17851.6	16323.6	17810	18473.7	18763.8	18276.6	12853.3	17173	19173.9	17871.2	7305.22	20522	16403.7	18772.6	17599.8	16108.7	8529.11	17612.2	20910.9	18897.2	21440.8	18309.2	17339.3	18422.4	19642.5	17949.8	8171.15	19031.7	7494.88	18932.6
CCT5	18759.2	20584.4	19383.9	19129.8	19055.7	21990.3	20017.5	23001.6	18623.7	19950.1	17692	16338.9	17110.7	17672.4	19786	17747.4	17820.8	20472.7	17133.3	19699.6	20716.8	18332.3	20440	23378.6	18923.4	16718	17122.4	19071.6	17260.4	8767.18	19104.2	16965.5	19828.6	19628	18068.4	11155.3	18475.6	21221.9	19979.7	22507.7	16167.8	17453.6	17915.3	20778.2	17773.4	10442	18547.1	9444.25	19639.6
CCT6A	20237.6	21689.4	20023.1	19495.8	18353.8	19067.6	18478.1	21349	17798.6	19677.3	16860.9	17509.3	18953.7	17277.7	19978.2	16442.5	19404.6	20535.2	19436.8	17650.5	17439	18312.9	19531.2	18063	16928.9	15382.6	18225.6	19519.1	17316	9187.58	21173.6	17575.2	18633.7	20508.8	18736.1	13322.7	19246.9	19345.1	20042.9	20118.2	19492	17975.3	20905.7	21417.9	19624.4	13475.2	20457.7	15742.9	21945.7
CCT6B	21081.1		21184					22170.3	21150.3			20931.2	23106.7			18163.6				18955.1	20030.5			20161.9		17045.1	24017.3			16186.2				22937.8		10811.3			17782.5			19799.2	23036.2	25222.1				18738.8	16814.4
CCT7	30576.1	28757.4	32488	29387.7	30739.1	28400.7	29478.2	20521.3	27882.2	28203.8	24012.8	24295.9	25617.7	26811	28866	25805.8	27386.7	29799.9	26863.9	26341.8	27419.8	26978.4	28178	27429.8	26485.7	21917.1	27649.4	27752.9	27352.1	15687.8	29659.6	24769.1	27809.3	26965.8	24989.4	17439.8	25145.6	27799.5	28156.3	28854.5	28030.2	25985.9	25174.6	27490.5	26130.5	17406.3	27155	17034.7	27938.5
CCT8	99260.2	95771.9	103161	92482	95290.5	97241.6	97617.4	95440.4	87205.1	93925.7	87922.5	86165.4	103161	96789.1	96550.9	85520.2	96957	99860.5	99901.1	98684.3	89526.2	96062.8	95191.6	96214.2	92979.2	73421.6	98088.8	106338	98512	40810.2	115853	88119.7	99286.9	95861.3	89759.4	41508	97066.7	102379	96267.6	97914.2	88322.7	87827.3	94942.4	107203	93323.6	51847.2	101394	45711.8	100282
CD47	1242.32	963.243	1425.5		1424.98	1639.97	1503.64	1410.65	1801.9	1147.04		1880.59	1847.29		1348.69	1947.11	1815.6	1961.29	2094.74	1216.82			1831.55	1847.2		2587.01	879.383	1236.89	1200.98		1624.15	1274.61	1532.77	1209.72	1985.55	1565.5	1669.71		1150.12	1243.33	1623.33	993.85	1487.95	1263.06	1804.69	2297.14	1489.01		1484.34
CD9											535.655	809.216			884.125	1613.58		1177.61	1350.04				893.59		1203.83	1968.16			1577.39		1930.31	944.053				1464.97	862.047			883.493				1393.48		810.986			273.951
CDC123	830.772	1647.79	1134.54	1461.75	1088.37	1592.62	2249.35	1395.04	1521.38	1896	1750.89	1120.46		1939.45	1672.46	1765.3	1298.13	2318.46	1580.65	1428.98		1293.68	1799.87	1489.4	1327.17		969.638	1211.38	1903.93		2084.96	1819.95	2289.99	2322.01			1704.83	1684.18	2149.89	1833.56	1925.39	1495.64		2189.16			1910.41	1274.82	1327.93
CDC16	953.603	599.314	760.247	697.268		614.258	687.647	1178.93	618.476	364.959	589.892	963.118	635.061	701.731	900.965	316.786	499.44	812.534	847.145	925.18		948.471	799.631		735.03		994.403	664.02	960.405		1017.2	805.996	701.294	665.183	1081.64	1174.72	797.403	702.927	360.463	925.615	620.64	645.149	1069.52	651.577	845.145	1706.85	1421.37	1045.1	765.892
CDC23	1283.77	1309.39	1349.5	1374.88	1251.57	1177.45	1493.57	1245.12	1291.74	1691.72	1401.05	1025.02	1315.73	1950.97	1563.39	1677.45	1082.25	1487.29	1441.34	1419.08	2893.01	1358.05	1044.69	1172.14	1476.11	1840.24	1221.24	1441.68	2051.79		1678.09	1101.13	1617.79	1527.81	1775.28		1691.25	1113.96	1679.27	849.667	1646.91	1248.7	1607.97	1243.92	1600.86	1251.55	1747.96	1278.66	1507.8
CDC27	1187.17	804.429	871.159	787.633	880.195	836.726	925.733	1101.45	1118.9	751.28	512.943	774.769	581.531	657.072	979.666	1033.38	884.158	711.161	1152.19	981.076	707.226	609.279	628.369	744.272	847.349	1431.52	848.023	671.868	844.818	1478.28	534.725	781.757	948.823	1164.52	914.356	762.241	860.979	823.976	713.282	843.008	1042.93	625.532	861.31	816.922	641.887	361.478	576.199	799.172	864.281
CDC37	6276.35	6410.5	7001.78	7183.52	6687.12	6577.41	6631.72	4304.94	6737.6	7188.37	6977.95	6423.84	7237.44	7413.06	7377.61	6118.48	7994.73	7867.03	6090.29	6748.67	7969.24	7726.01	7215.81	7356.2	7355.92	8835.27	7022.14	7843.45	7619.14	2973.25	9187.54	6603.33	7242.63	6949.76	5618.8	2969.69	7309.28	7774.77	8375.34	7110.97	6025.84	7548.89	5969.55	6802.09	6644.4	2293.95	7072.42	4302.77	7624.11
CDC42	1568.46	2652.61	1918.37	1965.93	1774.32	2489.29	1438.94	2506.09	2568.1	3225.03	2297.56	3154.42	2602.21	2893.06	2656.66	3491.24	2450.68	2963.88	2257.03	2282.28	3121.18	2769.94	2215.85	3026.88	2177.68	5415.89	1624.9	2389.18	2390.77	2676.99	1371.53	2772.66	2387.45	2464.72	2295.45	2249.33	2677.63	2435.07	1924.12	2529.45	2314.35	2457.81	2289.27	2228.31	2502.41	2442.18	2290.45	2654.67	2593.76
CDC42BPA	11603.2	11490.3		10771.6		9704.21			10036.8		7618.01	10740.2				10437.4		10653	10281.2					8980.9	11164.3		10592.3	10039.6	9379.18		10203.3	11011.6	9148.1	9797.66	11334.6		8808.9	9116.83	10376.3	8317.88	9036.76	10413.3	11222.1						10442.5
CDC42BPB	2020.95	1597.17	1010.88	1726.59	1200	1644.95	1597.32	1708.76	1493.68	1685.79	1512.45	878.746	1809.75	1511.88	1473.89	1641.55	1924.94	1695.4	2628.4	1387.72	1380.78	2548.28	2516.37	1579	1657.29	649.52	1828.76	1960.04	1941.1	2198.95	1620.67	1648.62	1849.79	1883.59	1627.03	1890.81	1464.98	1652.07	2469.56	1493.06	1404.96	1553.5	1760.04	1456.05	1741.08	1683.86	1662.98	483.556	2036.25
CDC42BPG	504.059	251.102	582.725	603.235	518.507	540.498	415.996		624.047	207.686		314.111	416.299	295.686	406.771	373.306		214.398	345.208	794.458	776.226		665.446	480.636	586.548		783.728	464.508	610.447	79.6176	406.551		683.519	370.02		192.449	341.574	276.986	637.132	182.768	273.751		162.24	243.172		137.205	650.415
CDC45	720.618	524.591	848.265	675.692	772.865	544.556	666.234		1048.24		977.942	1283.77	715.159	1126.77	636.191		752.922	1010.97	941.361	586.01		899.885	825.795	910.293	795.71	598.189	817.398	885.204	497.492	863.451	1036.24		727.113	939.319	734.261	605.108	874.866	806.985	979.664	693.658		1151.27	988.897	675.971	1576.94	1376.91	643.912	1502.06	802.334
CDC5L	178083	150521	177636	216536	242318	231356	191482	290590	205591	147965	231230	224187	231159	212473	190213	226510	232967	217696	248627	236007	211942	222606	212445	230881	198856	206940	230043	240314	234305	285314	198183	292326	237957	221514	341474	397751	243452	187709	193776	235491	227491	221092	181936	199442	220279	353195	191701		220641
CDC73	1754.2	1745.5	1842.03	1893.06	2399.16	1921.49	1582.25	2194.29	1596.19	1948.75	1594.34	2092.01	2053.36	2481.39	1959.98	2211.87	1846.51	2187.8	3053.35	2248.79	2087.26	2243.23	2593.86	2157.09	1788.09	1501.89	2215.82	2186.17	2318.09	1995.09	2830.01	2471.14	1909.25	2790.73	2590.16	1202.63	2262.53	2506.36	2073.23	1799.88	2230.14	2111.85	2499.27	2188.78	2049.54	1982.04	1878.67	1777.31	1983.22
CDH1												678.554		1162.89	369.54		707.635			511.821		740.788				2578.41		464.576			1139.46				723.923	3311.08	963.705	686.974
CDIPT	3546.33	3557.76	2843.64	3499.08	2362.14	2951.31	3050.05	2662.81	2274.73	2154.36	3867.75	4584.15	2560.19	3456.14	3788.88	3299.79	3100.19	2972.21	3709.48	3377.41	2204.91	4149.56	3547.21	2645.5	3290.16	3656.39	4756	3347.48	4057.18	3353.04	3420.88	3406.46	4417.35	3894.8	4463.03	4337.55	3191.23	2167.79	3346.09	2815.28	3035.99	2235.01	2996.63	3383.53	3228.18	5036.74	3071.48	4283.37	3047.82
CDK1	4234.69	4034.58	4819.75	3446.84	3925.21	4181.18	3521.53	4260.42	3108.94	4046.46	3476.44	4111.63	3380.44	3502.41	4257.41	3207.32	4388.28	3914.01	3861.71	3922.54	3470.96	3557.34	4197.01	3928.04	3632.3	1940.29	3640.54	4026.89	3767.57	1723.67	5013.36	4313.49	4464.23	4081.38	3907.76	2350.65	3888.11	4262.87	4092.59	4622.94	4316.96	3661.4	3969.3	3785.43	4944.59	3611.63	4660.77	1890.7	4048.81
CDK2	2394.48	2357.05	2320.46	1475.32	1773.22	1846.73	1671.96	1642.94	1881.64	1528.65	2758.31	1324.31	1753.27	2319.88	2310.4	1553.57	2179.08	2060.21	1758.83	2383.82	1842.4	2061.72	1795.94	1827.67	1903.51		2145.82	1670.8	1993.07		1661.33	1746.27	2287.69	2018.08	1677.67		1965.96	2398.02	2341.7	2373.07	1391.11	1703.01	1790.04	1817.69	1617.11	901.34	1831.88		1761.8
CDK4	3653.07	3433.19	3984.77	3637.46	3615.19	3348.73	3723.45	3692.89	2548.17	3227.03	3346.81	3709.29	3503.89	3132.25	2910.01	3545.87	3591.22	2818.65	2487.2	3039.59	3439.72	3011.34	3959.87	3933.44	3583.94	2585.51	3078.94	3685.39	3983.72	3067.93	2898	3133.47	3542.25	3374.85	3707.29	3921.02	3929.83	3162.49	4658.73	4227.69	4108.99	3649.97	3904.65	3668.93	2578.27	4411.13	3271.88	3124.86	3452.76
CDK5	2776.51	2632.69	3260.01	3375.65	2803.83	2711.88	3090.73	3635.68	2649.66	2524.42	2632.99	2944.34	3011.95	2811.55	2981.99	2862.95	3190.7	3310.51	3037.38	2979.67	3442.94	2558.63	3252	3068.32	2506.73	2972.5	2141.42	3149.01	2627.67	2476.11	2535.89	3356.52	2778.1	3273.76	2914.94	2471.7	3254.3	3584.23	3209.72	2744.16	2833.35	2908.7	2923.39	2743.54	2304.94	3738.07	3180.28	2227.35	2527.14
CDK7	846.997	1380.34	1334.07	1393.2	1005.39	1390.18	1031.79	1245.76	1451.49	1743.65	1256.61	560.671	286.995	782.746	1441.67	1122.63	1037.27	1134.15	1399.75	1199.09	688.316	1402.36	1011.94		979.513	1125.44	668.243	1285.24			1526.5		1202.06	1457.56	2209.63		922.895	1049.63	943.051	1257.79	1400.44	828.348	814.77	1264.56	858.265	576.439	1402.3		944.463
CDK9	1971.74	2529.22	2815.76	2427.88	2350.25	3236.49	2959.33	2150.75	2546.41	2444.37	1623.01		2684.37	3875.36	2167.54	1974.84	2319.73	2504.17	2553.26	2270.96	2182.99	2507.16	2433.01	1932.5	2396.86	3202.35	3794.19	2240.44	2746.19	1620.07	2580.62		3100.38	2916.87	1997.54		2223.21	2421.08	2148.64	3045.13	2838.66	2454.64	2616.2	2493.18	3047.62		2433.34		2145.51
CDKN2AIP			492.15	130.356	426.191	575.13		267.201	438.685		175.882				425.517		283.789		554.54	366.852	326.047		570.813			884.065					421.055	411.008	679.528		559.367				312.859			249.457	464.133	337.656					733.089
CDSN	518.205			377.543							315.077				433.519					1021.08						14066.2			336.095						1018.85										4587.16
CELF1	2267.75	1713.21	1677.29	1247.65	2002.26	2157.23	2032.5	1583.83	1241.24	1685.67	1418.76	1940.59	2648.09	2090.07	1682.58	1831.88	1115.56	2176.86	1899.86	1764.88	1177.2	1596.91	2204.65	1723.59	2033.22	1486.06	2935.34	1669.77	2387.79		2350.57	1297.59	1778.54	1463.84			1763.52	1226.63	1781.72	1661.9	1490.06	1702.56	1650.87	2209.3	1877.62	1769.32	1981.9	1561.13	2293.33
CELSR2	735.653	576.697	641.285	787.2	876.794	861.867	1099.48	961.101	749.633	763.461	1143.21	496.251	716.385	985.353	708.336	1253.97	1064.48	239.049	725.45	537.882	419.287	772.482	383.437	779.926	577.04	798.84	928.748	723.506	939.326	1119.5	1297.25	487.224	793.869	835.722	1011.62	925.765	604.218	673.727	591.28	614.272	664.032	926.461	776.107	1113.99	650.053	543.367	400.596	1052.9	1472.64
CENPJ	2408.1	2345.04	2252.71		2070.4	2053.16	1869.29			2748.94				3000.38	2581.77	2476.1	1697.77	1978.27	3262.41		2670.25			2612.52	2485.96		2402.64	2421.54	2458.6		2350.09	1855.74		2387.4	2302.4							2200.25	2570.82	2394.09	2730.07	1834.32	2323.5	1952.54	2331.21
CEPT1	5010.57	4931.16	6241.14	4928.93	6061.03	5301.83	5968.78	6290	5032.41	3566.23	3612.94	4469.6	5710.59	3632.87	4563.38	4531.94	4997.8	4523.15	4444.72	5370.31	8759.64	4407.76	8701.44	7965.34	4394.26	3793.97	5322.02	5985.12	4946.57	4610.95	6747.84	5196.77	4582.81	4965.08	5328.1	4317.51	4901.56	4036.85	9564.6	5166.04	4304.76	5445.21	5912.57	4287.29	5385.19	5153.12	4686.06	6675.12	5986.54
CERT1	862.393	572.419	624.444	575.929	692.915	805.768	572.517	446.362	656.143	645.817	968.711	725.676	680.67	753.864	794.229	754.398	704.529	722.696		502.54	343.834	1012.6	610.936	873.632	1174.5	601.701	748.467	739.653	720.583		917.333	992.127	858.712	1011.42	1280.3	647.505	988.165	786.855	770.714	664.101	813.013	763.48	965.531	875.113	952.921		1070.7	1536.68	568.734
CFAP20	2243.48	2581.03	2081.94	2215.19	2400.66	2266.42	2065.12	2291.7	2560.11	2230.59	2603.28	2736.48	2704.17	2433.07	2920.69	3208.98	2671.98	2735.23	2522.96	3120.57	2277.95	3058.69	2536.61	2371.3	2842.66	1737.8	2387.39	2586.52	2718.39	2782.92	2514.34	2709.4	2261.44	2217.08	2913.55	4504.9	2629.48	2450.97	2931.15	2437.05	2574.07	2411.1	2306.33	2239.23	2011.31	3264.62	2486.7	2711.39	2731.28
CFDP1																					1286.31		1049.27
CFL1	19671.7	29125.9	23007.3	27605.7	22445.2	26993.9	24556.6	9881.87	25780.6	24955.2	21317.6	24114.7	25049.6	27658.3	25812.6	22215	26313.3	27350.6	24201.1	29132.2	28972.5	27557.5	27435.3	25271.6	26144.8	28807.9	24131.5	26635.8	26392.1	11973.9	27523.4	23549.6	23887.5	26103.9	22881	14645.8	25420.2	31538.6	30921.9	26300.6	27145.7	23232.8	24756.1	26022.7	28158.1	16422.3	26245.5	11698.7	24711.8
CHAF1B	566.983	280.664	457.571	481.88	199.219		343.183		576.257	454.9	288.818	370.457	287.558	388.955	477.189	406.762	513.249	174.205	564.561	702.667		402.398	317.333	537.049	205.267	438.096	508.842	351.884	321.664		609.369	314.333	457.864	504.7	477.249	398.234	420.399	401.609	301.546	245.457	481.677	251.22	586.506	322.948	504.097		517.864		366.976
CHD1L	1055.61		917.01		1029.22	1295.44	694.551	1150.65	873.981	483.144	676.308	632.219	1473.27	380.343	1056.95	621.253		753	662.974	830.256		367.777	2316.68	1179.6	752.248	807.788	917.794	829.052	840.997		992.911		900.191		810.08		866.588		2425.78	1234.68	1093.56	657.962	764.481	1678.42	632.56		806.18
CHD4	857.923	893.362	1265.66	936.464	1108.57	679.313	584.253	890.778	596.09				532.607	525.341	550.903			835.269	791.961	490.297	429.019		624.349		674.942			801.496			626.212	847.057		737.435				509.622	787.8		621.621	858.314	1102.91	389.298	967.769		454.682		693.073
CHD6											1158.21				785.708							761.039	568.719			1727.97													1658.97						1293.13			2658.1
CHDH		394.75	620.506	405	564.22	640.171		268.738	533.1	583.478	408.162	864.218	172.473	458.856	466.884	655.819	466.553	391.753	494.687	718.47	724.785	690.919	580.907				180.448	820.185	777.3	975.963	546.934	500.339	296.912	937.299	518.699	597.94	373.761	279.403		364.969		522.269	264.473		576.839	624.203	662.99	596.248	542.169
CHEK2	2403.02	1551.45	2334.6	2081.76	1512.34	2287.96	2821.07	2020.79	774.888	1914.38	1963.4		2519.55	2014.74	1621.5	2300.87	2252.22	1716.63	2032.78	2077.35	2126.31	1703.42	2554.64	1437.71	2300.11	2543.87	2955.59	2161.5	2508.43	3429.7	2097.69	2056.26	2407.26	1833.82	2084.93	3403.17	2731.52	1865.27	1954.95	1443.65	2747.11	3016.13	2874.18	1869.32	1859.84	2756.53	2093.39	2074.02	2294.23
CHI3L1																						1191.18				4119.15				1055.16															1374.53
CHID1	875.935	941.187	1330.8	861.724	1032.67	730.353	1008.33	690.214	830.979	823.278	809.977			1199.75	1192.55	526.735	845.558	1018.93	1219.95	1294.16	1141.77	821.726	1076.72	833.179	796.092	841.772	1007.52	1327.1	969.323		770.398	1004.02	563.02	705.467	646.287		880.296	860.271	862.163	815.673	651.738	946.374	852.888	897.473	1347.03	801.453	766.42		861.688
CHORDC1	2891.86	2983.4	3184.54	3264.02	3013.83	2901.58	3355.78	2398.88	3250.16	3282.38	3422.5	3075.57	2978.01	2792.9	2691.31	2559.64	3004.64	3018.65	3361	2893.15	3792.22	2922.08	3170.38	2824.44	3365.7	2514.7	2611.12	2513.58	2389.31	3381.56	2401.1	2587.88	2415.1	3385.34	3388.51	3718.98	2844.71	2651.88	3342.36	3495.93	3111.91	3028.89	3356.45	2892.53	2533.58	3230.04	2640.45	3221.91	3166
CHPT1	2974.35	2964.45	2952.72	2107.37	2499.4	2572.67	2901.47		2523.47	2870.17	3043.85	3080.97	3170.23	3151.99	2259.86	3434.26	2203.64	2284.89	2247.72	2448.27	2590.24	2646.86	3277.22			4297.72	3032	2317.81	3096.81			1974.05		2696.39	2561.93	2467.42	2680.39	3307.81	2743.41	2385.07	3692.03	2152.24	2472.05	2020.56	2418.67	4458.21	2446.63	2694.98	2246.05
CHTF18	768.496	395.229	731.742	672.58	574.432	446.786	721.052	355.219	423.553	436.343	640.044	445.387	927.164	718.059	501.425	640.233	290.61	538.152		512.498		287.894	968.643	378.4	723.759		591.329	561.949	611.753		385.209	436.277	461.97	600.023	1279.28		413.164	248.75	599.847	574.346			499.952	258.025	377.791		809.146		547.875
CIAO1	2588.15	3451.14	2633.6	3164.09	2712.22	3476.56	2505.46	3072.73	3838.74	3618.47	3772.01	3856.93	3908.18	3597.76	3464.92	4219.26	3573.86	3774.26	3433.5	4334.41	2583.52	4100.46	2845.27	3609.67	2810.75	2581.87	2520.95	3292.93	2753.03	3337.33	2071.21	3711	3111.76	3627.83	3232.47	3522.26	2750.34	3155.35	3269.08	3256.29	3547.11	2873.88	3131.36	2743.1	2928.31	3456	3249.03	4050.36	3084.51
CIAO2A	868.773	745.67	1085.44	1325.78	1138.21	1021.37	1298.96	1494.23	1307.18	1283.35	1513.97	1364.56	1698.23	1661.03	951.935	1595.75	1005.37	1470.51	1251.94	1161.3	498.756	1251.02	1167.04	1083.09	1265.76	1343.24	1620.31	1074.6	1292.65	1548.85	1065.98	1292.31	759.034	1500.7	1113.82	1419.35	1236.5	1185.48	1143.69	843.571	929.349	1076.58	1706.85	1115.63	835.121	1109.89	1098.71		1158.5
CIAO3																		395.564		761.538			372.882	424.983					600.54		671.607											643.36			552.578				621.68
CIAPIN1	2568.35	1811.32	2246.31	2552.41	2845.88	2120.54	2585.8	3054.77	1546.99	3266.45	2499.89	2464.6	3031.38	2255.92	2338.98	1800.91	2105.12	2469.51	2847.65	2834.68	3132.24	3335.15	2519.6	2125.68	2066.1	2452	3021.22	2907.73	2638.08	2172.7	2623.94	2274.94	2430.1	3088.84	2615.63	1693.06	2437.62	2314.35	2961.38	2148.08	2520.11	2763.49	2079	2114.76	2444.7	2317.46	2699.4	2260.91	2190.05
CIRBP				373.001	476.843	662.883	395.617					670.272		804.279	951.402	903.938		1465.73				573.765			1000.28	1036.11			830.873		624.906	772.005		635.504	788.97		564.529		617.786	637.991			473.8	622.652	554.057				933.712
CKAP4	1526.16	1143.76	1006.49	1312.21	1357.08	982.275	1418.67	1562.09	1522.58	1354.85	1611.78	1083.94	1855.72	1683.29	1485.16	1281.34	1233.68	991.412	1230.28	1246.13	1500.45	1392.17	1184.12	1307.4	1564.01	12841.8	1592.75	1473.16	2115.13		1202.77	929.179	1357.58	853.752	1184.47	3413.42	2038.69	1363.72	1394.17	1662.44	1346.27	1054.53	900.923	1042	1366.3	1075.41	1032.27		1248.72
CKAP5	2305.43	1703.12	2225.9	1678.51	2390.28	1608.63	1975.17	1487.34	2023.26	2084.02	1999.11	1707.21	2383.06	1877.48	2012.66	2206.66	1824.81	1946	2149.62	1996.69	2026.75	1829.14	1944.99	1934.16	1832.95	2232.4	2009.99	1992.27	2246.39		2196.45	2029.56	2475.31	1852.29	2223.39	1101.58	2502.7	1886.68	1951.37	1729.93	1673.07	1556.71	1862.46	2109.03	1777.47	1136.56	2099.34	981.737	2215.68
CKB		289.149									598.731	226.165														827.151										1507.21
CKMT1B	2234.88	1727.94	1411.08	1945.3	1469.09	1226.82	1735.27	1762.51	1607.02	1907.54	2134.08	1495.56	1753.37	2010.75	2071.78	2194.66	1770.04	1645.07	2446.13	1964.85	2247.99	1719.43	2124.75	1532.48	1772.6	32440.2	2019.45	1762.43	1345.86		2297.87	1805.48	1584.5	786.344	2219.43	33495.7	1997.35	2141.18	2760.99	2221.31	1814.39	1421.67	2124.75	1974.72	2600.63	1029.65	1660.52	872.328	1522.72
CLDN3	3303.23	3584.2	3733.32	4349	3797.23	3211.55	4555.47	2088.67	3764.13	4497.98	3186.53	4105.24	4525.7	4287.04	4140.5	4028.48	3824.34	4889.92	4766.64	4138.58	2800.03	4160.09	3561.5	3616.25	6304.39	1783.21	4069.02	3412.31	4224.29	2790.9	4518.51	3305.84	6241.24	4067.92	3937.31	2001.82	4335.6	3777.48	4096.77	3591.78	3926.35	4083.15	3920.45	5704.55	3451.57	2451.2	4338.32	2889.88	5115.96
CLDN7	860.779	599.847	666.846	769.35	214.535	570.536				676.873	843.906	616.94		641.411	640.817	596.414	683.44	483.457		515.822		453.038	1287.82	637.932	717.579		540.251	732.845			324.464		983.272				479.848	340.313		775.009	552.449			398.422	369.992		802.615		770.293
CLIC1	11076	9635.09	11155.3	10168.2	12018.2	11488.9	10553.1	9522.52	10129.6	10193.1	9011.49	10068.6	10849	10259.4	10616.4	9735.09	11144.4	10213.7	10032.9	10018.4	9268.39	10535.8	9964.58	11097	10934.6	14262.7	10171.1	10364.7	9461.63	3829.69	11615.9	8424.13	10650.2	8945.14	7798.73	4503.95	9808.79	10450.8	9643.2	11132	9779.81	9725.07	9507.5	11112.8	10056	4855.45	10898.8	4053.42	10627.1
CLIC4	1058.14	1302.32	1042.22	1210.58	1182.53	1145.02	1295.81	1201.45	1625.09	1006.03	748.296	1228.51	850.209	1275.11	1038.23	1282.08	1099.58	1393.67	1631.02	1211.76	478.088	1385.01	694.253	1143.11	1373.31	979.859	1053.4	1256.82	1410.63		1121.54	1069.51	1482.58	1025.89	1000.28	1156.56	1015.26	988.534	816.86	1080.65	1029.43	1273.9	1444.89	1432.47	1279.55	1718.15	1066.61	1248.51	1415.83
CLINT1	1543.62	1294.95	2157.23	1245.64	1672.18	1171.35	2423.7	933.445	1906.76	1811.54	1374.64	1140.11	1167.41	1027.42	1024.77	2672.36	1290.12	1212.54	1811.82	1630.49	2159.69	1420.27	1799.92	1509.61	1697.88	1596.69	2430.57	1371.82	1987.54		1352.76	1505.83	1863.48	2102.22	1507.67		1475.16	1459.04	1787.59	1578.84	959.65	1486.99	1679.14	1012.12	1407.38		1384.46		1595.96
CLIP1				656.566			599.08												606.933							3279.84							503.297					216.929
CLNS1A	3337.02	1893.06	2217.19	2111.74	2651.64	2093.38	3544.44	1659.63	2746.22	2373.05	2200.95	3298.19	3719.76	2332.58	2519.31	2366.63	2626.73	3737.28	3083.17	3270.01	4668.6	2647.76	4373.15	4559.15	2857.66	2715.75	2189.97	3256.29	3342.05		4253.47	2403.48	2630.38	3933.12	2007.55	1271.18	2409.69	2436.11	4580.71	4420.19	1906.79	2344.58	1700.04	2424.82	2648.73	1816.69	2429.61	728.624	3043.3
CLP1	2029.22	2098.14	2903.88	2687.59	2382.53	2466.01	2167.25	2250.87	3116.18	2785.18	2360.26	2014	2953.14	2295.72	2611.11	2187.97	2563.76	2249.26	2558.26	2505.99	1701.31	2127.75	1669	2238.45	2502.67	1820.97	2551.3	2239.11	1805.58	1723.36	2177.61	2414.78	1721.58	2451.09	2195.05	2872.1	2434.16	2228.23	2678.59	2951.05	2087.68	1962.67	2193.33	1940.4	2208.28	2421.49	2075.09	2382.63	2066.27
CLPTM1	2655.97	1894.89	2297.8	2558.56	2115.43	1555.65	1928.18	1836.77	1061.83	1360.36	1377.83	1629.42	2045.37	2674.53	1537.16	2292.92	2964.57	2190.53	2415.61	2290.21	951.047	2380.59	1604.37	2297.61	1836.03	1416.18	3167.96	2606.45	2345.85		2748.49	1477.82	2424.4	2321.03	2329.5		1909.51	2209.1	1927.38	1886.42	1506.52	1625.56	1250.55	2803.2	2372.06	1876.39	2366.3	932.552	1468.85
CLPTM1L	806.721	1008.09	699.599	1257.82	734.073	557.875	975.385	728.745	843.611	755.349	789.658	1381.24		734.417	575.969		671.092	906.898	1093.09	1001.71	987.232	891.971	945.177	684.873	263.377	993.677	941.364	582.215	1030.11	884.693	721.611	1307.91	1006.99	924.881	1059.44		879.131	874.591	909.605	816.108	777.783	849.279	894.392	717.278	973.432	1404.96	563.702		795.587
CLPX	2072.01	1384.92	2547.87	1817.26	1658.84	2060.3	2092.08	1062.71	2127.42	2067.91	1746.95	1572.64	2081.31	1772.31	2127.22	1655.66	1706.26	2003.19	1881.82	2029.97	2145.54	2017.38	2231.24	1933.97	1875.46	1922.91	2122.5	1721.14	2086.29		2377.53	1672.9	2147.68	1676.33	1624.67		2242.63	1907.31	2251.64	1461.42	1439.89	1929.5	1848.19	1945.93	1540.28	907.861	1835.26	787.607	2092.53
CLTA														736.245						411.557					780.063				529.554		729.715				792.676	834.559		678.591			694.008
CLTC	35849.3	35553.3	37028.1	36278.3	36891.3	37522.2	36995.1	33630.6	35580.2	39569.4	37054.1	37451.2	35017.9	39464.3	39222.5	36840	38761.3	36660.7	38480.2	36622.8	32575.2	36686.7	37465.8	36452.6	36548.6	34674.9	37387.1	37632.6	35518.6	21819.4	36666.9	35545.2	40540.9	39674.8	35462.9	22439.2	34663.2	37590.5	37656.3	35217.2	39856.8	36322.1	37170.7	37989.1	39614.7	26152.1	36363.5	21599.6	40914.8
CLU	2438.41	1957.84	1818.25	2889.59			1358.52	4469.22	2302.94	1933.55	2926.6	2264.4	2811.15		2739.96	3247.74	1731.23	2503.7	2909.49	2685.46	2552		2651.38		3095.97	2189.46		1759.51		4890.67	1679.03	2972.98	2686.09	2843.02	3382.3	6591.61	4359.34	2524.34	2238.91		1917.16	2982.5	2852.21	2621.45	3077.73	5112.33	3431.59	4377.19	1873.31
CLUH	5733.73	5930.31	5703.82	6166.4	5707.63	6183.39	5834.45	5800.03	5625.59	6387.61	5581.91	6191.92	5663.94	6015.62	6576.13	5816.99	5713.34	5719.79	6236.89	6077.99	5672.17	6350.88	6546.54	6340.38	5712.46	5041.72	6200.39	6684.29	5843.08	5726.27	5717.88	6581.96	6074.2	6112.55	5686.87	5114.88	6672	6046.19	5182.67	5849.83	6393.74	6234.52	5760.67	5796.79	6354.86	5397.74	5889.11	5409.21	6059.48
CMAS	1642.01	1089.75	1595	1515.58	1087.02	1617.85	1429.29	1694.54	1642.34	1699.98	2051.22	1346.08	1857.22	1342.93	1464.55	1248.83	1397.48	1200.58	1234.34	1103.99	1522.36	1122.73	1029.61	1672.65	1427.05	2155.11	1458.66	1118.27	1365.59	1368.92	1517.58	1447.35	1243.77	1692	1400.99	2233.98	1307.42	903.461	1549.61	1416.65	1317.97	1445.87	1637.16	1291.58	1702.82	1478.35	1630.98	1498.88	1372.4
CMBL		1058.1	744.07	774.449	817.305	795.458	994.087	2211.84	761.61	918.83	1599.96	967.469	1147.27	1042.22	956.069	1080.62	1132.39	1182.25	1787.51	809.434	669.267	724.756	629.885	889.203	893.761		1142.99	889.102	1350.33		1283.93		610.205	2038.86	1156.8		1412.27	1122.1	1360.79	1026.19	1309.52	991.542	722.132	1097.47	1012.45	986.226	1097.92	1295.89	1147.36
CMPK1	407.897	271.814	656.66	664.011	408.269	469.001	296.32		644.828		314.185	1102.4	244.922	334.959	307.332		578.993	508.125		412.756	226.461	244.539		547	358.914	1004.51	462.907	219.653	575.436				414.094	49.655	565.839			271.5	393.151	408.387	283.283	470.502	274.09				272.057		437.461
CMTR1	6438.68	6871.12	6001.76	6741.83	6800.05	6330.14	6541.24	6422.79	5863.45	5844.81	7382.27	6874.8	6753.92	6466.93	7216.51	8790.38	6031.28	6417.06	6122.59	6469.58	6880.35	6569.02	7808.69	6558.41	6101.81	6124.83	6737.54	6576.84	7202.74	6778.34	6216.44	6682.2	6233.53	6864.64	7612.5	8481.49	7096.69	7354.34	6919.2	6530	7588.22	6937.2	6951.31	6619.65	6968.25	7484.15	6559.08	7328.15	6153.67
CMTR2					597.605							683.932
CNBP	251.761	578.586	447.624	598.951	622.505	746.006	897.814	914.078	748.627	714.618	807.35	775.513	498.785	877.22	575.432	782.615	455.748	992.743	1099.58		244.495	640.56	938.504	837.672	850.61	1465.3	888.36	848.163	939.437		1102.28	776.029	498.619	510.128	503.204	1049.71	482.262	557.256	538.448	1189.64	590.154	541.149	806.021	1145.42	351.735	1333.98		626.555	759.387
CNDP2	6832.85	8597.2	6866.04	6403.76	6513.48	7824.71	6378.66	7326.32	7792.11	9297.13	8414.75	8175.66	7743.18	9334.01	7689.93	8061.84	7700.23	8471.23	6982.59	8187.87	8107.34	8600.18	8383.08	8343.14	7117.98	11892.8	7331.54	8113.74	6705.02	5488.9	7842.16	8145.15	7600.24	9456.8	7372.48	7139.32	7687.62	8947.11	7586.96	7763.2	6849.18	7259.42	8187.95	8214.06	6677.99	5696.01	8333.35	5574.44	8232.99
CNN2	1480.79	1473.94	1407.05	1597.34	959.25	1319.78	1616.69	1196.37	953.44	1366.43	739.61	1441.6	1264.46	1110.37	1469.96	958.346	1100.38	1366.67	1165.19	1103.92	725.924	1405.5	934.262	1353.17	1197.25	2772.64	1370.35	1356.64	993.662	447.647	1674.45	1573.18	747.898	1032.53	872.648		962.586	1553.85	575.557	1220.92	1652.36	758.125	1373.62	1881.66	1337.9		1644.18	231.461	1501.94
CNNM3	450.908	661.235	688.07	885.634	889.754	819.869	1218.16	866.12	725.901	628.221	705.432	997.1	821.605	598.808	852.228	772.842	861.787	589.564	1195.91	733.254	688.911	1067.24	820.39	821.685	680.715		1046.97	953.003	995.204	1144.03	776.876	1226.04	851.428	604.851	874.811	1154.46	1217.38	755.037	957.8	732.65	697.231	818.889	431.483	784.79	1085.65	568.876	886.299	1749.34	680.632
CNNM4	1747.48	1714.44	1688.95	1643.42	1813.18	1690.97	1948.25	2216.65	1548.98	1560.16	1859.59	1568.39	2449.27	1435.57	1802.83	1611.57	1337.38	1670.16	1400.03	2326.39	3402.65	1258.81	2625.07	2365.42	2052	2000.63	2384.29	1524.15	1541.27		1372.97	1835.64	1641.52	2142.23		2352.86	1778.82	1234.04	2002.4	2083.89	1399.19	1426.72	2067.81	1614.48	1839.16	2110.13	1620.89	1208.6	1413.76
CNOT1	3803.04	3393.29	4002.21	3505.12	3801.78	3514.17	3786.02	2675.26	3339.47	4006.34	3302.02	3251.92	3554.71	3758.06	3431.81	3018.12	3485.86	3641.72	3581.79	3237.93	3353.47	3735.82	3645.79	3380.41	3582.24	2812.37	3447.3	3654.61	3698.8	1063.96	3711.16	3276.05	3319.15	2939.46	3237.56	1448.58	3786.41	3962.41	3338.54	2872.16	3292.49	3282.31	3189.97	3258.21	3528.09	1283.84	3629.24	595.492	3449.93
CNOT10	479.01	587.541	305.306	543.575	339.926	522.069	881.331	786.141	786.152	624.707	795.412	464.66	246.383	506.346	652.716	399.232	621.675	581.354	405.5	332.964	724.546	806.633	481.754	627.466	598.589		473.643	518.038	799.694	741.301	612.383	541.155	446.302	812.849	827.002		520.258	406.223	501.65	690.403	421.2	705.587	744.669	346.749	795.858		601.383		748.528
CNOT2	591.531	1016.88	787.536	679.033	574.738	716.221	899.097	1266.12	919.052	768.472	1206.27		708.324	1068.2	438.62	1015.12	932.163	657.382	1150.92	514.982	1386.98	768.274	1010.95	1083.51	565.655		750.205	1095.82	669.21		833.145		493.793	602.439	924.179		636.081	600.478	1126.66	853.475	686.819	144.247	895.013	925.248	671.574		857.231		584.168
CNOT3	1295.48	1263.1	1147.33	1636.27	1331.9	1208.66	1165.47	1599.2	1199.95	1247.24	1346.67	1733.19	1868.86	1664.62	1544.41	2039.44	1536.36	1450.92	1429.8	1545.17		1665.06	1365.23	1959.7	1187.95		1255.5	1438.07	1480.42		1316.36	808.02	1873.74		2012.64	842.098	1516.77	1259.94	1470.94	1516.26		1514.44	1600.76	1437.11	1439.41	1313.3	1202.21		1583.69
CNOT6		905.087	658.363	764.104		587.189				652.334	1149.29								425.98												346.89										1013.52				742.825		669.178		666.55
CNOT6L	1426.83	1181.9	951.858	1547.06	599.433	1385.54	1503.13	1040.83	1123.71	1058.71	1256.79	1517.39	1442.34	1124.15	1174.28	1516.6	1290.44	867.395	1342.79	1135.12	1328.05	1204.38	1249.54	805.358	1113.76	827.1	1055.52	1234.29	1022.68	897.71	722.656	1357.3	735.075	918.877	1875.43	1221.4	853.833	954.164	865.941	759.342	1018.02	1244.63	1301.7	812.665	992.156	970.134	1142.77	1558.2	1463.17
CNOT7	1440.79	1635.34	1591.32	1216.41	1326.72	2196.58	1331.29	1534.14	1882.93	1674.89	1110.77	1137.28	1267.66	1365.75	1610.45	1359.17	1716.91	1252.74	1063.85	1391.16	590.846	1463.08	1391.02	1331.51	1441.23	1200.23	1410.24	1832.96	1945.94	1025.3	1758.74	1613.75	1195.66	1676.86	1399.18	889.756	1359.42	1548.37	869.275	1556.17	1791.33	1501.42	2070.59	1811.99	1492.08	2144.47	1954.86	1019.24	1606.53
CNOT8	1177.8	794.346	912.062	1464.26	1006.45	986.871	791.328	840.685	894.156	938.808	927.431	695.42	813.266	406.247	1006.09	993.881	972.971	724.624	721.111	1084.18	1248.2	969.989	1129.3	1187.64	908.349	925.892	978.544	677.061	506.779	1418.23	927.476	983.51	809.691	1076.06	1227.18	810.879	958.954	962.559	659.983	672.058	1029.92	1218.94	1257.09	763.099	836.294	1252.05	906.389	1178.07	993.151
CNP	753.186	1281.9	849.959	1000.36	712.106	827.947	824.508	1135.51	735.759	877.132	1141	1130.7	1270.98	1018.5	1541.36	997.658	1439.72	945.943	932.041	1761.04	949.46	1355.63	1074.46	949.839	993.681	991.121	1361.99	1193.19	1044.31	1078.3	1014.68	1484.59	1036.27	1084.07	1431.23	1487.95	1558.75	1078.64	864.259	1083.64	1205.56	877.671	1074.06	1065.72	997.101	1367.58	1164.92	1031.97	1477.44
COASY	664.18	800.882	865.062	596.785	779.366	604.574	681.717	370.347	557.381	558.48	450.367	449.789	1117.59	778.754	652.359	543.842	585.677	578.947	428.173	590.441	1101.76	677.367	654.505	826.404	650.604	784.439	924.864	578.035	706.01		573.626	882.794	703.32	651.122	756.086	555.661	571.595	591.311	846.107	683.547	662.755	665.212	616.548	824.226	434.787		485.672		755.138
COG1	1095.53	906.42	1254.68	1078.72	944.156	911.618	1159.42	1190.06	949.612	980.734	886.112	822.232	1207.98	979.388	987.997	740.177	1194.04	1192.45	808.925	1330.06	732.201	1098.08	1220.45	1007.57	831.269	730.716	1274.32	1027.08	1153.05		1360.21	745.926	1025.58	992.05	674.127		827.762	1049.92	900.788	1036.5	776.334	932.867	1401.65	1073.3	875.764	753.639	1239.83		938.737
COG2	891.61	1107.49	693.003	1055.35	1077.98	1070.19	1085.7	517.465	963.222	1161.71	781.364	970.874	1615.44	1440.33	888.213	1012.92	1152	1268.89	949.766	1343.69	626.921	675.633	984.565	1056.27	1014.31	809.7	970.746	1238.31	1438.49		1076.02	770.246	1284.45	1154.34	966.564	219.536	894.916	775.19	1564.13	1130.82	435.273	843.688	571.079	1446.99	1045.37		824.896		1117.9
COG3	2206.76	1553.55	2493.12		1816.73	1303.72	2569.57	1995.41		1092.56			2309.17	2423.82	2040.8		1870.87	1890.96	3551.59	1405.67		1453.07	1566.41	1981.98	1383.13	1772.26	1635.17	1865.43	1463.16		2114.63		1202.8	1524.35	1869.41		1714.14		2805.6	1581.1	3144.75	451.2	1614.13	2169.47	1689.06		1632.99		1333.16
COG4	804.106	950.046	1003.55	672.106	972.115	1144.94	1424.93	1030.28	941.48	1098.71	851.856	1447.67	1084.27	1336.73	1225.08	807.062	1282	1145.64	1309.36	1246.54		1154.14	1242.59	1033.19	821.492	499.71	1237.98	776.698	1276.43		1163.55	1136.36	1360.33	956.147	956.052		1210.02	817.926	1643.8	892.72	1105.82	819.2	1108.7	1026.16	498.998	1100.18	1135.89		1096.85
COG5																					628.865		754.175	414.103									404.314					212.812	781.406										663.423
COLGALT1	5733.59	5155.3	4321.8	5129.58	5652.8	5185.46	6248.93	5449.84	5082.41	4693.35	5431.51	4256.4	4485.52	4951.63	4876.18	5679.59	5613.88	4845.87	5454.47	6115.73	5711.32	5004.69	5536.53	5299.53	5800.23	3712.01	5182.32	5086.63	5029.26	4935.73	4825.9	5365.39	5174.47	5514.85	5923.37	4538.09	5234.09	5331.61	5385.78	5316.4	5074.25	5415.45	5243.12	5312.38	4915.21	4352.43	4747.98	5418.39	4906.38
COMMD3	433.254	510.968	816.454		586.764	564.781	1519.67	732.639	777.968	492.923				788.958	268.738	496.009	745.33	654.774		459.081		661.957	610.94	398.572		414.413		712.957	425.833				548.297	670.53	602.68		1150.37	611.119	712.836	754.663	720.063		872.195	503.576	691.336		403.313		485.324
COMMD4	1647.53	2258.28	2450.53	3457.7	2303.62	2457.68	1847.23	2383.38	3006.17	2499.42	2550.33	1465	1701.1	1726.92	1871.44	2448.25	2274.56	1539.98	2282.9	1793.81	1071.82	2350.47	2135.48	2112.22	2060.3	1306.31	1930.77	3133.58	1945.65	2790.21	2179.84	2142.87	2241.44	1919.72	2955.12	2329.78	2364.29	2717.9	1488.58	2128.92	3081.56	1964.4	2462.54	2604.38	2471.13	1979.44	2538.08	1672.99	2092.51
COMT	5455.57	5302.94	4312.23	4151.74	4822.26	5517.1	5347.15	7788.31	5697.38	5751.92	4232.9	2373.12	4526.32	4234.91	6038.54	3958.64	4733.45	6173.04	3501.46	5104.81	6446.56	5030.4	8120.68	7554.18	4212.16	4002.07	4652.05	5417.74	4524.1	2906.3	4017.06	4908.37	4990.42	4777.04	4803.85	2909.07	5732.03	6473.94	8539.64	7574.04	6167.19	4938.97	5257.64	4371.52	4758.92	3303.19	3676.19	919.232	7080.94
COPA	15698.8	13972.6	16031.2	14861.2	16532.8	14419.2	16284.7	11684.5	16102.2	15270.4	15017.1	13567.8	13804	13729.4	14248	14119.8	15626.3	13426.7	14931.6	13151.5	11583.7	12481.2	12955.8	13138	15419.3	15839.6	15435	14669.5	14655.1	11009.3	14382	13012.4	14620.6	13741.8	14494.1	10122.4	13022.2	13569.3	14342.7	12508.7	14450.3	15189.7	14702.8	14368.7	14205.5	12667.3	14621.7	11855.4	13772.1
COPB1	11655.8	12026.7	11379.4	11802.4	11910.8	11747.3	10610.5	11517.2	11475.7	11736.2	11685.9	12708.3	11302.8	11746.3	13129.7	12290	11875.2	11820.1	11729	12326.1	11825.3	11771.8	12216.3	12952.1	11814.8	12299.5	12238	11947.1	13083.8	10118.1	11506.5	11948.5	12638.6	12893.7	13829.9	11039.3	12362.1	11575.4	13611.5	11061	12333.1	12826.8	13112.9	11191.7	12106.9	12107.7	12084.7	11153.7	12662.2
COPB2	13935.8	15535.8	14478.5	16372.6	17015.7	16136.2	14808.8	13845.5	17869.4	18523.1	18394.7	17021.9	14741.1	17736.6	16884.4	18836	16684.8	14902.9	16716.7	16113.8	12406.4	17371.8	15041.4	16282.7	18458.6	16446.6	15641.4	17640.9	16944.1	16481.8	15111.6	19057.1	16147.6	18198.7	17133.7	15252	15432.7	15695.3	13749.2	15369.9	16787.9	17900.3	17756.3	16432.5	16630.2	17405.2	16130.6	17705.7	17299.5
COPE	463.764	937.727	612.704	658.001	715.255	425.91	651.701		910.801	984.433	839.049	1089.19	826.45	687.322	816.669	962.248	810.59	1000.12	483.108	1258.5	966.203	765.521	411.88	1411.9	1267.45	486.106	908.583	637.721	944.443	431.989	704.883	593.811	715.699	643.266	885.865	448.275	620.017	487.606	994.097	454.975	521.046	647.416	597.622	721.804	1079.42	711.629	832.725	840.251	892.624
COPG1	4925.2	4568.87	4978.62	3828.72	4431.47	4597.64	5160.84	5191.5	4355.19	4473.85	3898.79	4046.14	4560.15	4340.17	3698.35	3758.48	4717.06	4914.32	4573.54	4172.11	4013.83	3677.07	4907.21	4465.64	4215.89	5902.45	4145.79	4674.06	4180.84	2366.77	5164.17	4230.22	4169.22	4083.78	4676.22	2727.65	4455.52	4096.5	4351.59	4482.93	3953.75	4208.2	4367.25	5310.39	4419.08	2951.92	4247.66	1731.69	4734.34
COPG2	3201.1	3148.98	3423.78	3264.17	3274.32	3444.13	3937.91	3486.01	3135.94	2810.27	3300.08	3375.56	2809.2	3456.97	3283.53	3202.6	3546.29	3798.68	3108.08	3080.9	2625.58	3748.54	3251.14	3409.03	3027.64	3387.43	3105.26	3180.1	3342.38	1028.57	3772.44	2971.25	3644.29	3177.67	2700.71	1079.3	2841.98	3410.84	3150.89	3137.22	3273.76	3312.87	3577.31	3523.92	2885.75	1444.25	3860.38	1482.15	2957.62
COPS2	2149.4	1743.34	1910.52	2195.7	1819.63	1783.48	1755.65	1980.33	1347.79	1498.78	1801.76	1616.6	2372.11	1967.22	2073.16	1861.63	1878.45	2439.35	1884.58	1992.21	1511.61	2227.01	1850.62	2037.42	2141.56	1136.21	2050.26	1910.03	2264.03		2325.87	1607.42	2228.49	1937.47	1601.14		2229.81	1961.27	1863.03	1919.03	1760.43	1690.13	1610.15	2183.71	2048.98	812.74	2241.72	1084.21	2012.32
COPS3		726.201	409.17						490.473										557.933		1010.92	926.158	979.131		383.143	1287.22	400.922						673.053					403.813				448.742
COPS4	2037.6	1204.54	1249.39	935.971	1989.37	1278.95	1835.5	1201.14	1713.04	1666.35	1367.58	1441.04	1192.24	1606.81	1753.88	1601.82	1470.13	1913.24	1933.77	1478.42	1335.99	1555.86	1494.27	1864.46	2005.06	1759.77	2124.31	1211.19	1055.31		2139.68	1348.47	1694.94	1119.77	1220.17		1925.39	1383.45	1424.34	1755.73	1696.34	1335.41	1092.81	1520.8	936.124	450.338	1339.51		1312.69
COPS5	2067.13	2227.63	2339.91	2172.15	2109.94	1980.58	1898.12	2781.1	1846.52	2575.6	2349.68	1643.84	2016.81	2429.94	2587.53	2422.84	2200.12	2260.23	1927.87	2594.8	1402.72	2558	2299.42	2382.19	2141.84	2265.65	2465.71	2754.18	2273.41	2585.98	2373.99	2678.89	2340.42	2661.14	2142.96	2330.83	2032.87	2134.16	2271.11	2257.43	2628.23	2663.54	1752.21	2148.8	2108.5	1665.2	2255.1	2096.63	2369.08
COPS6	1145.97	1429.15	1266.76	1152.63	1346.03	1491.12	1007.78	1082.72	1140.06	1146.92	1343.66	1063.27	762.595	1640.83	1366.98	1561.19	1372.34	1470.48	926.033	1369.83	995.859	1451.34	1133.25	1478.25	1165.1	1283.34	975.335	1225.9	1470.6	586.836	1388.46	1264.25	1145.07	1095.43	1176.31	1121.03	1171.7	1233.85	1138.28	1138.69	1245.29	928.805	1279.02	1181.96	1240.51	1250.23	1200.47	876.37	1389.1
COPZ1	4741.69	3625.81	3834.69	3432.65	3940.2	3472.02	4184.4	3932.21	4754.32	4203.43	3538.98	3960.01	3404.76	4617.07	5168.03	2733.17	4543.95	3898.58	4110.1	3885.49	3633.9	4453.73	3515.95	3900.17	4204.89	5420.89	4613.75	3417.62	3998.14	1555.03	4358.19	3741.88	4159.02	3709.72	3770.57	2556.14	3501.35	4018.13	4637.87	4057.83	4498.74	4741.57	3478.74	4666.32	4069.3	2285.6	3162.55	2313.26	4993.76
COQ5		452.635			691.578	733.373	625.597		740.904	582.563				606.283	820.845				566.588				676.936	503.845			749.431	524.328			796.226	622.526		540.663	563.118			662.197		532.86	773.587	569.521		865.241	696.782		807.442
COQ6	1900.12	1106.77	1706.34	1716.97	1312.47	1441.39	1383.87	1315.96	1232.27	940.965	1927.22	1016.89	701.829	1543.08	1580.55	1501.42	1652.14	1100.44	1896.83	1116.96	807.521	1447	1032.63	1068.76	1830.91	1003.97	1265.47	1439.53	1868.15		1252.61	1563.88	1023.53	1394.07	1043.72	855.113	1354.86	1445.24	1127.64	1550.32	1203.67	1448.71	892.969	1989.27	1369.54	1089.38	1551.76	632.617	1087.43
CORO1A	313.494	210.934	467.723	608.217	385.827	428.843	362.338	852.686	347.34	490.956	790.834	322.4	340.938	832.254	532.608	430.303	653.299	393.352	703.257	499.121	814.959	460.666	912.882		565.711	14147.4	503.227	644.968	404.4	539.786	633.182	467.591	520.37		625.43	843.793	799.996	835.676	631.24	480.247	410.521	742.973	521.552	231.837	376.249		677.719		582.175
CORO1B	19689.5	21932	21926	21971.8	21324.9	23227.4	20599.4	20790.3	23334	24694.4	20260	20544.1	18355.5	23473.6	19481.7	22172.6	19274.1	19692.6	22380.2	19483.1	20266.3	21920.7	20401.8	21369.6	21927.6	15731.1	19533.4	20584	19168.9	16160.7	18523.7	18070.1	17456.7	19688.4	18589.4	18003.2	19383.2	23901.4	22468.7	23601.3	21880.8	20854	21103.1	19840.5	22263.6	18950.9	20696	19183	20616.6
CORO1C	4492.44	4940.69	4761.32	5788.93	5518.96	5050.18	4842.23	5410.87	6203.4	5864.92	5858.88	5187.43	5132.24	5630.31	5757.68	5379.5	5591.81	4862.28	5188.02	5087.41	5292.65	4294.1	5321.6	4889.19	4506.84	7637.09	4705.36	4435.22	5216.34	4288.41	4682.13	5378.7	4076.83	5151.03	5085.49	4628.11	4420.93	5025.28	4084.33	5955.02	5164.63	5737.84	4515.64	5501.83	4688.07	5332.35	4860.02	4686.83	5232.49
CORO7	411.296	359.178	333.012		449.974	256.046	267.85	908.505	580.684	370.107	228.134		250.987	335.69	375.764	497.833			430.712	326.887	323.047		647.199	151.208	506.068	1293.98		266.929			442.889		439.206		385.016	231.783		430.486	448.211	961.565		384.392	384.17		626.222	640.341			589.266
COTL1	276.09	216.128	305.407	348.125	517.803	596.321	571.158	360.034	468.987	509.078	450.012	372.451	338.691	370.421	434.267	630.548	416.554	404.984	303.851	267.831	280.561	230.957	130.42	228.471	242.166	336.287	477.123	279.801	394.931		423.352	303.583	324.453	562.905	398.8	223.048	168.345	301.535	356.96	152.514	371.938	186.658	288.993	529.839	378.361		279.441	353.336	455.411
COX4I1							464.71												757.782							4218.03	450.068				646.26					1978.67								420.37			277.306
COX5B		963.109				987.573	551.347	1236.68	1016.31	753.28	795.078	1103.59		1033.87	814.975	1008.12	957.351	1075.88	1730.33	960.792		739.341	1232.36	742.184		3403.51	595.172	1019.89	1716.74	1076.27	1013.11	1741.62	882.774	552.062		1621.9	1018.85	902.545	912.989		1421.54	868.482		1104.08	1076.67	2813.44			1431.18
COX7A2	3294.06	3823.21	2669.95	2960.02	3535.78	3655.08	2976.25	4828.08	5529.02	3774.34	4319.13	4555.09	4247.51	4490.43	4199.6	3553.93	4412.37	3312.52	5259.28	4757.23	4292.91	4394.12	5065.1	4270.86	4707.16	12557	5133.55	4035.84	4477.35	3672.47	4065.81	4475.16	4093.59	3590.23	3271.78	5752.25	4515.09	3459.49	3794.63	4398.72	4212.67	5713.85	4027.09	4421.37	5361.84	4197.29	4485.15	4173.43	4256.8
CP										269.053							1003.91									5897.52						61.8536
CPA4															229.612								706.873		401.234	3729.31										2838.68									695.607
CPD	1274.94					1760.64		1216.77	1184.45		1097.43	1532.67	983.162	1612.35					1740.35			1594.1	1357.4				1889.04			962.194	1851.84			1322.28	1734.92	1076.5		956.627									1744.02	1248.02	1895.92
CPNE1	5421.07	5791.17	4723.71	6300.92	5973.65	6738.85	5710.73	5163.37	5666.85	5508.31	5692.9	6169.96	6951.82	6777.41	6309.59	6539.03	6477.65	5475.24	5672.03	6736.57	5866.12	6118.57	6501.76	6371.71	5827.83	6701.97	5670.68	5742.32	6257.02	6511.56	5542.15	6428.55	5601.18	6100.04	6430.28	8463.54	6292.93	6042.71	5480.95	5413.2	5982.45	6509.63	5930.16	5557.76	6632.39	7032.92	5962.73	6458.79	5552.83
CPNE3	20573.2	24800.3	18871.6	25059.2	22586.4	26632.4	17574.6	26205.9	27564.6	28659.6	28580.9	28526.2	25796.9	27928.1	26001.4	29461.6	27211	26361.5	26941	27175.3	22356.3	28711.5	25061.6	29085.7	26118.7	27170.9	24440.8	25652.4	24320	28551.9	19454.9	29546.4	22596.1	28272	24743.6	31532.5	22642.4	25327.8	22969.4	27382.7	27934.8	27727.3	24643.3	23911.6	26167.5	29477.6	24770.4	31029	26717.4
CPOX	750.748	808.587	651.2	267.573	237.463	885.967		746.705	1172.93	822.008	1337.04	1145.21	794.918	1093.92	878.956	1189.59	852.631	1059.38	1053.02	1021.49	569.29	1149.38	696.888	975.672	340.746	1860.78	929.222	928.38	540.54	398.954	864.279	649.955		960.014	727.729	770.737	663.701	926.65	580.261	517.064	1057.42	955.93	1036.12	1486.02		612.024	486.479	451.962	767.945
CPSF1	1839.73	1966.01	1928.29	1724.85	1850.27	2251.15	2166.19	1911.31	2124.66	1292.44	1855.9	1532.67	2397.19	2076.9	1633.63	1857.48	2124	1586.81	3418.3	1620.36	1425.24	1959.54	1560.15	2245.98	1800.66	1999.98	2542.7	1796.59	1937.01	3522.75	1997.76	2046.3	1645.49	1555.67	2287.94	2467.39	1726	1920.28	1671.99	1519.01	2437.98	2305.99	2007.93	1895.69	1954.45	1561.45	2245.73	2294.79	2207.81
CPSF3	1962.93	1556.13	1964.07	2209.55	1779.07	1731.08	1718.01	2342.31	1777.54	1887.04	1399.92	2230.17	1794.04	2238.08	1452.53	1669.55	1897.6	1596.13	2045.95	2071.36	1677.91	2157.65	1588.74	2022.35	2029.75	1979.53	2082.95	1798.62	2077.79	2715.25	1794.83	2535.73	1973.51	2239.02	2138.75	1602.06	2085.02	1739.98	1553.13	1618.06	2043.21	1696.49	1555.16	1419.96	2062.58	1408.74	1752.93	2316	1959.93
CPSF6	2066.27	1038.14	1811.1	831.78	1305	1884.23	1443.12	2816.48	1381.12	1209.24	1661.89	1549.41	2236.68	1604.68	1533.96	1608.72	1651.83	1543.6	1675.99	1436.82	1919.16	1212.73	1564.47	1678.16	1254.42	2040.84	1564.83	1853.36	1243.14	1586.64	1931.47	1874.85	1611.4	1741.93	1635.55	1187.34	1535.39	1530.07	1023.22	1403.88	1818.92	1367.93	1447.24	1289.27	1375.54	1428.35	1779.63		1868.46
CPSF7	2902.47	2407.25	2284.04	2905.79	2518.18	2510.75	2507.14	2450.57	2831.37	2229.78	2450.73	3052.03	1974.72	2632.62	2869.87	2773.17	2308.84	2584.33	2117.99	2483.99	2554	2165.5	2487.1	2259.69	2778.17	2539.55	1975.21	3420.95	2388.57	1591.33	2245.42	2789.16	2896.78	2606.37	3412.66	1969.94	2533.51	2465	2554.36	2673.29	2799.9	3013.84	2345.38	2566.46	2764.82	2726.83	2492.68	2939.75	2701.96
CPT1A	7842.06	7830.61	8633.61	8853.27	8604.17	8737.13	9040.01	7188.07	8078.69	8238.95	9624.87	9501.36	7431.52	8240.27	7574.52	8156.59	8984.78	7135.32	8790.17	8226.22	5873.47	8004.75	7957.14	8105.87	9394.54	6645.97	8340.58	8107.41	9173.89	9475.09	7645.62	8845.41	9391.29	8878.93	9054.17	7239.16	7456.67	7306.47	9064.38	7457.56	9048.28	9949.68	8274.11	8551.2	8362.07	8727.3	8328.99	8408.17	8648.63
CPT2	1235.08	1629.32	1309.45	1549.88	1791.11	1554.4	1363.81	2518.62	1452.27	2027.79	1506.01	1421.73	1060.65	1311.91	1885.51	1518.7	1532.24	1516.2	1372.45	1572.85	1549.84	1775.48	1493.24	1179.69	1696.04	1999.85	1568.57	1927.25	1272.41		1515.93	1494.54	1410.7	1342.46	1466.61		2186.64	1704.49	1130.82	2055.87	1469.02	1240.22	1597.77	1676.3	1565.7	1569.81	1575.58		1752.22
CRABP2	1674.79	962.79	695.912		1633.96	1203.79	1762.24	1718.05	897.112	750.103	1638.01	765.327	495.698	1089.14	1069.13		996.06	2085.36	1879.16		1130.72		1231.89	970.494	1564.48	23191.9	1271.05		1525.23	713.818	3347.72		1070.15		1438.98	4266.17	888.871	585.148	1797.18	1402.08	1052.01	1101.23	1187.99	1567.71		1816.7	1891.86		946.981
CRBN	2926.87	1797.19	2713.68	2313.33	2723.8	3102.18	2359.68	2551.52	3394.58	2121.81	2642.06	2369.24	2026.24	3166.96	2448.91	1799.44	2481.15	2040.41	3618.99	2717.86	2150.73	2514.87	2635.3	2438.92	2223.72	2301.09	2969.72	2432.67	2427.9	3445.3	2385.3	2748.68	1622.58	1938.62	3488.88	1591.7	2171.53	2328.74	2226.3	2457.22	2652.73	2018.88	3950.15	1612.74	3221.13	2500.94	2464.97	3565.55	2441.26
CREG1																			304.184																	6325.38
CRLF3	461.442	721.714	329.787	407.104	196.256	605.708	878.744	634.834		572.583	581.91	720.214	852.252	481.186	695.862		631.107	456.496	510.475	572.41	602.41	419.871	620.281	474.132	495.679	600.662	316.413	267.641	560.406	527.713	524.293	519.04	418.916	543.41	568.465		567.478	709.618	397.781	878.814	285.821	587.145	418.224	570.09	118.93	785.372	548.881		491.026
CRNKL1	2093.02	1845.82	1682	1745.7	1736.18	2153.98	2149.06	2270.24	1503.16	1566.38	1596.69	1353.89	1636.11	1460.25	1700.11	1698.23	1437.9	1794	1413.23	1906.96	2108.41	1819.1	1865.14	1972.92	1342.45	1630.43	2412.8	1609.5	1437.8	1348.83	1720.01	1640.71	2027.18	1492.93	1722.83	1471.25	2258.87	1862.12	1582.46	1857.81	2339.26	1529	1645.96	1579.32	1568.48	1162.86	1712.57	2178.86	1382.06
CRYBG1			275.854																							3613.5	409.093																						574.685
CRYBG2	2984.67	3748.06	2667.17	1602.98	3221.23	1981.02	1259.41	3279.84	2721.09	2396.3	2231.04	1556.02	630.865	1242.54	1383.22	3197.77	3746.88	3007.14	1004.33	2215.8	3423.69	2623.08	1418.67	3382.75		1802.47		1063.15	2026.83		960.407		2203.67	2118.22	2500.95	3962.11	2903.68	2304.14	2477.28	4607.04	1224.35	1130.35	1031.5	813.917	1402.14	868.894	1479.27	2324.97	2417.49
CRYL1	5315.59	5451	5166.55	5259.36	5851.92	6368.02	3865.69	6715.41	6480.67	5212.83	5341.53	7413.95	4004.27	5394.77	5624.73	5741.39	5267.56	5202.44	5527.23	6520.93	5456.26	6008.13	6991.06	6531.4	6303.15	7091.86	4242.21	4941.22	6345.13	6494.15	4884.29	5704.08	6657.27	6755.44	8647.63	7865.83	7889.91	6206.89	6868.01	5715.38	5727.8	7574.15	5433.66	4634.55	5239.47	5583.29	5241.19	8959.16	5545.22
CRYZ	7611.69	6015.39	7245.17	7881.97	6724.6	6049.41	6847.37	5602.75	6688.93	6632.63	6295.81	6251.9	5352.87	6169.6	6537.62	5527.69	5846.59	5859.23	6768.1	6367.06	4071.72	6044.02	6046.47	6028.16	7477.75	6829.02	6970.02	6423.85	7316.54	5469.58	6897.94	6622.76	5490.37	6947.06	6211.33	6569.79	6154.6	5943.42	6671.88	7158.83	6186.31	6964.82	6618.32	6413.51	6810.14	5090.26	6161.6	6257.65	6881.35
CS	23547.7	26225.6	20017.8	21178.4	22150	23714	20690.4	20906.8	25824	25286.1	20282.9	21319.2	22566.8	24658.8	24810.4	19848.7	23753.5	28366.3	23955.7	24811.7	24789.2	23548.1	23383.7	27185.5	23434	28863	24549.9	28242.8	23955.1	3996.16	27481	19947.5	22054.6	22071.8	16171.8	7251.17	24085.4	27461.6	21317.2	26789.7	24046.8	23164.6	22926.5	27140.8	25031	7019.69	23335.3	5002.85	23577.9
CSDE1	10364.4	11267.4	8923.33	9732.79	10262.9	11184.7	9413.95	9497.21	10624.9	11370.3	12161.1	12647	12459	12446.5	12099.7	12785.5	11451.8	12213	12015.2	12389.5	10008.3	12356.5	11602.4	11267.4	10266	8947.46	9806.33	10413.7	11595.3	10972.1	9863.3	11859.2	10694.3	11894.9	10573.8	10804.5	10795.7	10596.4	10418.8	10623.3	10795.4	11662.1	10170.5	10259.1	10886.1	11411.5	11039.4	10165.8	9568.13
CSE1L	9587.63	7162.93	11034.9	7001.92	11529.9	9385.69	10433.9	5540.16	11376.9	11525.7	10666.4	9730.16	11649.5	12065	11122.5	8649.97	10236.4	8384.3	9345.94	9002.72	8738.2	8365.93	8267.78	9051.63	10393.4	8163.66	10822.5	8167.85	10435.4	2797.81	10470.7	6974.99	10695.4	6539.99	9417.11	2912.7	10461.2	7335.85	11105.2	7473.63	7821.97	7485.42	7615.59	9342.92	9359.53	4182.28	10110	3988.02	9661.78
CSK	4374.13	5165.56	4162.17	4864.5	4488.17	4613.23	4547.4	4842.02	3899.9	4120.06	4926.29	3959.48	5427.09	4230.19	5016.46	4579.88	5142.52	5194.42	4259.23	5174.36	5427.41	4869.43	4971.76	5833.2	3911.41	3662.38	4458.47	5455.36	4748.49	3004.7	4972.25	4276.95	5549.84	5132.28	4653.97	3296.71	5194	5296.96	5195.82	5004.57	5023.7	3902.9	4730.85	5170.46	5031.86	3299.52	5093.74	2543.55	5422.48
CSNK1A1	5389.91	6217.03	7256.74	6319.31	6641.81	8523.04	6024.91	7761.9	8171.28	7092.24	8789.54	6580.71	6413.09	7427.48	6249.43	5681.72	6231.91	6743.08	7046.37	7072	7422.75	5871.45	7441.85	6273.79	6170.44	10629.3	6184.56	7570.53	7345.03	6909.74	6678.9	6807.82	6685.13	8296.73	6957	6221.57	6689.99	6889.12	6670.51	7163.01	7167.41	6347.24	6559.35	6515.96	7238.35	5316.01	6609.16	5769.27	7165.91
CSNK1G3	317.479	273.965	71.3429	215.868	99.2318	138.57	259.929	170.163	164.93	112.07	124.841		327.469	201.372	101.067	114.691	253.811	197.033		209.972		294.397	142.387		169.834			281.242	247.325		89.9127	258.152	113.377	298.491			190.022	240.878	146.365				134.2	237.696	144.978	186.42	277.891
CSNK2A1	722.16	384.49			436.856	709.435		700.18	303.997	701.937							867.117	539.824		418.706		272.264	402.344	617.025			242.857											294.486		1048.89									933.396
CSNK2A2	2547.92	2618.76	2356.85	1627.75	2218	2342.34	2479.7	1934.23	2076.6	2008.73	2357.69	1579.1	2367.4	2041.55	2369.1	2067.62	2053.38	2327.33	1874.58	2066.48	1382.12	1916.7	2158.21	1908.7	2593.87	2615.82	1737.5	1766.72	2142.71	1698.63	2067.06	1779.12	2295.26	1639.07	1758.01	1951.22	1981.13	2260.73	2189.01	2411.99	2490.39	2461.28	2175.46	2246.5	2296.98	1932.08	2098.24	920.105	2326.01
CSNK2B	1348.79	1067.86	877.186	1837.01	810.884	1112.04	1238.74	3033.07	1023.94	1283.45	1003.78		864.174		1072.24		794.328	695.353	805.044		820.62	823.397	1348.91		1009.19	2467.2	1017.42	766.903	1649.3	757.876	1905.42	1203.6	837.315	1395.21			692.178	908.208	975.034	1186	886.675	867.421	1059.48		1287.14				848.524
CSRP1	2156.35	4578.1	1357.3	4083.4	2337.87	5383.54	1610.22	4866.28	5798.81	5645.63	6257	6527.45	6160.07	7277.59	4755.13	7438.33	5850.61	6127.42	4817.62	6894.83	4259.06	7348.26	3824.08	7163.68	4276.51	4136.94	4008.88	5504.45	3706.78	4851.61	4174.32	7166.59	3596.65	5729.22	4115.56	5715.05	4895.02	5406.99	2997.37	6134.74	4874.18	5449.3	3844.94	5073.75	5148.29	6165.08	4790.85	5294.87	5177.16
CSTA		794.672	625.535				877.641			3761.06					1262.06		1195.65	1096.89					629.332			32901.2				903.633						16809.8	649.45		723.744						4195.01
CSTB	1018.19	1058.23	1019	1148.43	1080.36	1139.42	1251.86	1251.92	1064.37	1264.17	876.133		1059.77	657.558		1146.19	831.053	1053.45	971.89		972.159		1259.62		1322.74	35429.9	2227.69	2168.85	1474.27		1730.91	1124.73			903.554	16448.4	987.655	933.29	1089.51	911.786	1375.8		1713.54	1484.81	945.328		1023.54
CSTF1	948.799	836.823	910.801	1017.28	1242.32	1084.65	791.258	736.613	1153.68	1425.97	1569.63	1545.81	1310.44	1509.12	1281.49	1576.22	1689.35	1284.02	1184.14	1281.12	1351.41	1490.19	1496.26	1715.01	1555.14	1459.44	1067.18	1600.3	1112.5	1251.29	1141.73	1405.9	1029.68	1615.45	1345.93	1557.17	1423.71	1396.71	1563.23	1362.62	1304.59	1463.62	1398.36	960.358	1212.55	1487.21	1676.11	1788.99	1449.49
CTBP1	2655.36	2485.21	2286.12	2300.28	2739.51	2179.05	2319.38	3165.16	2405.73	2121.96	2613.73	1889.63	2732.27	2277.92	2015.98	2042.67	2132.02	2310.71	2014.93	2911.83	1628.87	2314.72	2288.77	1907.96	1936.71	1779.96	2057.77	2519.23	1983.38	1530.46	2292.96	1743.18	1830.38	1996.04	2206.69	853.327	2248.38	2493.56	2321.25	2384.11	2377.48	2388.53	2157.33	1925.58	2083.24	1627.2	1833.86		2126.44
CTBP2	9466.17	7997.95	9578.49	9303.81	9913.57	9579.04	9654.48	10326.5	8409.95	8890	9092.71	10053.7	9439.8	8381.73	8330.49	9165.55	9004.58	7626.8	10290.5	9782.86	6748.65	8201.24	9495.55	8470.11	10156.1	5794.23	11073.1	9306.6	8814.89	9669.88	9076.03	9789.33	8872.21	8439.18	10780.3	8836.84	9754.66	7507.44	8998.3	7807.7	9775.32	11706.9	10905.1	10265.6	9818.9	10876	9946.28	9651.77	8177.28
CTDP1	675.649	157.571	415.667	361.472	372.678	792.905	340.698	948.684	311.945	489.805	308.366		369.028	619.523	274.1	424.831	456.89	772.361	524.76	461.76	1308.07		1297.95	922.511	515.781				592.895		460.152	443.735	475.815	282.924	589.58		436.725	569.351	1686.35	731.151	411.027	615.444	734.886	211.494	574.385	695.097	256.02		512.25
CTNNA1	1195.85	1129.74	1063.53	1097.93	1056.27	1030.78	1612.4	1455.24	1365.25	1356.28	1080.85	970.998	1090.03	994.038	1103.9	1249.01	814.996	1247.72	1407.89	1124.72	1588.51	948.856	1316.52	1038.64	1307.79	5359	871.844	1284.14	916.565		2045.61	1009.28	1052.19	1354.73	1007.31		1335.88	1302.17	1533.27	1246.16	1242.07	1201.41	992.547	982.557	1181.59		1207.85		1136.09
CTNNB1	1891.65	1905.03	2237.57	2166.13	2076	1917.75	2604.49	2441.15	1743.31	2140.13	1844.67	1652.41	2222.33	2160.87	2298.6	2085.91	1853.21	2427.24	2231.12	2009.96	2012.56	2201.2	2095.99	1877.52	2171	3361.19	2149.84	2197.55	1982.49		2243.97	1796.56	1987.4	1718.32	1784.02	759.244	2031.79	2087.08	1576.98	1883.31	1962.26	1678.46	2310.22	2318.09	1883.05	1118.82	2129.43	1449.92	1862.72
CTNND1	2043.18	1863.29	2017.77	1831.52	1690.37	1608.78	2123.05	1636.42	1840.86	1930.98	1223.89	2043.46	2495.12	2192.74	1440.15	1891.13	1741.58	1753.23	2272.24	2279.76	2298.36	1844.37	1494.47	1855.24	2229.97	3793.58	2275.25	1803.94	1969.5	420.195	2259.57	1507.78	2174.3	2208.72	2022.42	1347.03	2284.11	2022.53	1879.04	1956.2	1861.32	1705.73	1778.77	2498.33	2126.88		1877.08	1474.51	1967.38
CTPS1	6075.3	6431.89	6228.46	6375.86	6609.21	6556.51	6147.02	6148.87	5819.95	5837.59	6420	6145.79	5890.83	5664.74	5971.21	5464.92	5949.12	6580.99	5934.63	6835.95	5526.14	5480.15	6555.74	6630.02	5622.78	5237.75	6301.61	6501.12	6409.23	3224.44	7044.12	5614.26	6913.86	6421.29	5831.64	2934.23	7019.96	6772.18	7113.26	7230.61	5846.83	5734.66	6510.53	5952.5	6062.46	3907.91	6396.32	3523.67	6635.47
CTPS2	5652.2	5952.7	6629.17	6524.45	6130.72	6397.81	5440.84	6659.33	5083.84	5764.19	5345.05	4567.42	5628.97	6384	5830.71	5189.85	5690.15	6047.81	6423.14	5538.38	3476.53	6566.96	6592	5597.13	5527.4	2650.05	6324.24	6674.65	5838.76	3434.84	7577.15	5979.57	6159.26	5903.23	6317.59	3435.62	6455.7	7124.46	5837.75	5665.41	5880.82	5521.11	6332.34	6694.46	6027.26	3691.34	6615.15	3489.19	6406.91
CTSA	2546.88	2907.77	3006.42	2464.54	2689.13	3930.55	3115.86	3448.4	3750.03	2632.6	3574.21	2377.72	2452.21	3879.96	3672.17	3276.15	2765.26	2087.32	3874.06	2983.45	3626.39	3474.09	2824.52	2698.89	3442.44	5942.59	2532.97	2226.68	3159.86	2717.41	1672.92	2004.76	2944.55	2520.86	3512.07	22247.6	2979.97	2713.89	3347.63	2410.09	2581.77	2630.7	2839.45	2779.49	3695.03	1569.42	2051.54		3032.29
CTSB	1741.42	1877	2313.42	1808.68	1670.31	1835.34	1698.06	2217.03	1446.16	1961.09	1915.11	1153.2	1917.17	1360.81	1794.8	1544.92	2232.95	1740.27	2043.69	1981.51	1487.03	2098.36	1930.69	2039.2	2120.03	8841.95	2011.14	2207.13	1835.16	1078.57	2145.78	2183.36	1771.07	1599.12	1619.83	35327.2	1675.2	1864.46	1788.85	1710.56	1409.38	1201.1	1538.63	1742.73	2320.67		1566.93	1211.62	1330.5
CTSC	1354.89	1714.27	1638.97	1229.53	1914.72	1185.59	1061.4	1624.03	1895.09	1565.16	1498.49	1302.82	639.07	835.206	1103.96	1106.81	1459.56	1277.94	1325.51	1263.07	1030.5	1094.02	1334.46	1441.66	1076.02	10144.5	751.028	1061.85			1109.32	1190.97	1398.56	986.343	975.968	28469.8		1475.08	1770.12	1473.63		1508.18	1279.66	1150.91	1669.98	1230.68	1223.06	1775.83	1212.97
CTSD	22789.9	27802.9	19505.2	26997.7	23083.3	30822.5	24050.7	32304.9	29408.1	30641	27521.1	31113.3	29262.4	30331.2	31627.9	32994.9	30556.6	31846.4	31387.3	31536.2	28641.2	33856.4	32434.7	31296.8	31532.4	84298.1	27353.7	29172.9	28105	39812.6	25859.4	34397.6	26644.9	34080.2	32768.2	252621	31330.8	29869.8	29177.2	33821.6	33459.6	31022	31434.8	28875.8	36784.3	33868	28776.3	30929.3	27387.4
CTSG										198.221																41514.2	4039.77
CTTN	6405.66	7450.46	6531.04	6557.9	6344.47	7443.72	7214.14	5233.53	5892.31	7162.38	6944.23	7060.93	7048.51	7133.89	6902.17	6053.41	6477.29	7381.16	7414.84	7008.01	6756.66	6302.37	7953.5	7524.08	7195.83	7380.98	6911.77	7013.78	7250.36	3479.98	7916.83	6387.99	7676.08	6929.41	7060.82	5901.74	8735.12	8188.38	8017.82	7384.46	7944.01	7219.82	7800.96	8044.43	8313.72	3960.94	7244.93	4082.92	7652.63
CTU1	1186.7	1513.29	1000.84		818.591	989.443	524.765	706.852	1672.2		851.181	578.232		1438.37	531.786	918.215	714.753	806.884	1043.22	920.956		766.268	813.39	543.698	859.617		1009.3	908.187	716.636		1253.31	952.363	747.001		639.642		805.727	1079.51	985.457	928.202	565.745	1397.17	454.596	985.034	766.64	750.002	930.484		812.442
CTU2	1161.34	1158.63	1153.14	935.934	1062.42	1246.04	1336.16	1358.19	1035.57	1139.9	1082.87	992.558	1266.09	992.932	1119.1	964.601	1438.07	1277.7	1192.8	1165.85	1139.07	1198.12	672.054	1150.36	970.5	983.236	1212.94	1158.51	1147.48		1301.71	982.314	1147.78	1118.01	1087.15		822.214	1264.97	1403.51	1304.22	1015.35	859.891	1115.96	1047.8	1105.85		1121.19		1079.03
CUL1	4021.96	4443.06	4526.19	4776.24	4712.87	4633.63	3963.22	4043.21	5060.21	4486.75	5119.36	5652.97	4081.82	4836.98	4457.64	5182.94	4367.05	3605.44	4237.77	4675.93	3381.97	4386.79	4115.24	4538.91	4849.17	4494.7	4433.76	4658.61	4490.71	4125.77	4589.33	4919.42	4297.4	5173.64	4505.14	3987.67	4029.36	4086.62	4500.72	3759.91	4238.89	4417.96	4792.95	4482.06	4742.93	5090.5	4301.74	4964.25	3686.74
CUL2	3647.84	4045.78	3132.5	3972.54	3935.78	3873.97	3363.71	4455.31	3964.04	4205.99	4681.13	4783.77	4382.79	4440.43	3881.73	4695.89	4442.66	4205.27	4286.35	4535.62	3347.65	4896.71	3958.77	4203.39	4475.37	4243.84	4706.45	4538.71	4374.05	4557.11	3891.46	4767.99	4269.13	4701.96	4329.64	4467.22	3862.12	4183.85	3219.02	4066.6	4589.08	4191.34	4113.88	3984.27	4772.91	4314.43	3768.57	4269.51	4034.73
CUL3	4492.02	5210.49	4658.04	5078.26	4927.44	5037.36	4523.64	4996.53	4865.83	4816.05	4866.81	4720.53	4841.96	5073.91	4606.66	4254.52	4715.1	4644.59	5141.69	5037.97	4975.01	5103.73	5137.71	4566.65	4479.19	5593.68	4313.82	4936.86	5026.14	4892.7	4456.4	5238.02	5057.29	5275.6	5356.92	6044.8	5259.47	5059.63	5078.1	5063	4882.54	4844.41	4781.9	4587.5	4699.35	4846.41	4775.4	4589.02	4827.22
CUL4A	2945.44	2794.85	2911.71	2996.61	2649.86	2930.57	2626.39	2513.49	2737.04	2793.58	2830.05	2666.15	3031.43	2490.11	2721.61	2841.6	2537.67	2692.08	2600.86	2771.28	3214	2957.2	2551.39	2737.9	2296.19	2815.02	2435.11	3096.31	2553.8	1790.1	2369.03	2800.62	3069.98	2792.49	3313.64	1700.29	2733.06	2486.44	2578.27	2780.84	2516.34	2899.95	2756.12	2388.18	3587.83	2287.69	2659.43	2038.78	2707.02
CUL4B	2804.59	2982.45	2729.28	2462.22	3305.2	2913.58	2914.3	3021.88	3066.96	3307.12	3204.95	3564.42	2973.48	3144.28	4132.81	2776.64	3068.12	2672.61	2342.87	2872.74	2776.87	3129.49	2659.85	2902.67	2651.39	2659.62	3284.13	3178.83	3809.87	3181.68	2648.07	3015.79	3537.42	3356.37	4597.52	3282.71	2575.14	2720.29	3319.1	2819.1	3069.88	2681.22	3446.13	3183.64	3162.12	3889.87	2388.27	3760.33	2703.85
CUL5	118.376	172.542		225.496					51.2559	187.902						239.486		157.292						307.224														112.59						387.812					302.483
CUTA	1037.04	550.229	1403.18	1036.87	1495.36		954.316	1313.89	1540.88	1401.64	1121.44			1670.12		1815.48	1366.94	1079.93			2162.42	1283.34	1228.59	1885.84	1207.84	6100.24	1245.89	939.927	1831.46	2590.98	572.562	1030.32	770.587	1592.38	2434.95		1233	1015.85	1829.6	2084.5	1044.98	1645.76	957.073	763.326	867.728	1140.84	1151.8	1938.76	1708.51
CWF19L1	2544.84	2373.92	2467.13	3049.34	2757.48	1981.27	2596.34	2883.66	3055.14	2454.99	2941.61	2491.15	2926.43	2933.56	2481.29	3263.2	1997.6	2286.97	2801.45	2264.58	2424.72	1942.39	3151.34	2485.4	2909.94	2275.96	2160.79	2759.73	2973.92	2895.66	2597.03	2799.29	2891.01	2886.32	2728.52	1682.04	2801.58	2823.54	2912.45	2183.56	2413.14	2898.46	2750.34	2092.75	1887.19	3439.72	2565.45	2736.73	2417.71
CYB5B	720.327			1110.84	1071.27	954.322	708.209			1277.81	534.209	702.125	299.926	1505.48	929.144	1230.14	1267.59	782.354	609.096	744.037		707.016	1298.87	805.174		1224.79		1348.05	701.33		1090.09	522.527	620.69	767.305	804.013		620.32	976.214	610.282		770.513	944.661	653.565	949.689	463.066		456.544		505.257
CYB5R1	1663.67	2519.98	2360.15	2741.46	2149.24	2526.94	2298.47	2683.32	2795.64	3098.87	2790.66	2870.75	2602.22	2976.47	2944.28	2526.64	1939.25	2877.04	3259.85	3445.16	2418.12	3152.99	2927.9	2548.88	2660.17	5415.62	2772.52	3412.63	2334.19	2545.2	2892.35	2806.56	2220.92	2537.1	2847.54	3554.35	2937.29	2808.11	2722.82	2941.32	2827.05	3175.43	2898.63	1340.55	2358.56	2402.8	2414.74	2944.23	2553.37
CYB5R3	230906	272319	176160	276012	293802	291223	175555	388855	325620	314314	305532	308595	273277	314090	320669	374630	310254	320766	313362	302937	372595	228662	306077	336058	285008	500229	208856	264833	307454	397459	199711	297784	261728	314452	352475	406548	252739	278259	417555	412178	297116	338101	262447	175481	270905	472853	271635	464666	283789
CYC1				581.73			602.405			755.477	651.764			1062.02	871.974		986.616	718.916	373.133		1111.86			1107.88				867.487			777.659	590.398	828.296	1215.44	883.931	1093.32	481.241			1232.5		1104.71		820.582			685.641
CYCS	5932.84	5328.94	5935.98	5280.31	6562.77	4857.22	6631.52	3505.2	7319.57	6300.58	5493.86	5954.75	4589.23	5541.09	5183.46	4550.38	7029.57	6957.17	3730.3	6388.26	5290.69	4897.86	3995.71	4675.06	6362.45	43812.4	6333.62	4356.66	4644.49	3172.09	5236.78	5807.88	4511.4	4570.61	4706.44	14011.3	4365.47	3527.39	4760.11	5493	5157.46	4150.81	4765.05	4856.91	4748.64	3565.12	5258.11	4623.46	5529.45
CYFIP1	7923.08	6642.25	8372.04	8814.31	8048.95	7498.08	7023.18	7055.48	6633.67	7129.11	6704.67	7193.2	6403.8	7303.28	7683.89	6883.18	6922.85	6984.83	7194.11	7652.36	4915.44	7121.44	6788.86	7006.41	7448.97	7864.92	7703.6	8127.72	7220.87	4801.03	7894.06	6309.85	7506.82	7774.74	7808.62	6067.11	7383.02	7162.92	7104.94	6247.1	6985.59	6817.27	8057.82	7309.15	6582.48	6330.07	7658.78	5176.85	6839.05
CYFIP2	237.061	194.497			315.016	237.68		282.427	314.805	265.266					187.956		299.688	232.87	232.969	359.223		275.367		232.592								478.859	228.32	417.367		516.483		319.802		297.937		356.184	480.066		277.783		379.821		408.062
CYLD	5092	4865.94	4751.79	5809.3	6212.64	5157.64	4666.92	3730.69	5186.31	5345.43	5268.22	5627.53	4108.81	5514.13	4706.36	5750.08	4669.55	4602.17	4694.28	5168.75	5182.89	5057.51	5987.99	4616.29	5465.52	5384.24	4835.02	4092.41	5367.96	8106.58	3922.41	6047.01	5352.89	5173.36	6731.21	6825.83	4984.75	3715.2	5758.16	4716.68	5264.92	5795.98	5299.39	4637.15	5351.27	6583.77	4663.4	7438.87	5195.46
CYP4F11	348.642	252.366	659.003	154.393	639.373	467.672	276.313	350.741	787.85	346.42	952.226	341.426		437.319	472.673	676.746	590.529		571.136	551.95		647.009	500.937				490.59	489.606	616.445		828.627	621.258	262.303	496.759	973.567		349.072	348.38	479.766	520.437	665.244	497.451	444.292	310.755	294.042	308.845			629.17
CYP4F22		1161.15				914.535		479.888		927.74					1165.41		913.737	1463.86								7056.17					1357.94	1176.69		526.644				594.024			896.633		489.852
CYP51A1	3991.92	3707.44	3140.15	4234.39	3655.84	4024.38	4442.03	4081.72	3328.15	3647.05	3470.01	4321.52	3981.96	3984.42	3578.87	3214.01	4514.57	4227.39	4375.94	3570.43	4016.1	3690.36	4670.42	3472.43	4903.31	6715.51	3903.47	4280.66	4127.22	2011.97	4167.33	4754.62	4679.46	2834.91	2973.58	3012.47	4585.51	4091.31	3443.79	3051.88	3869.17	3750.31	4635	4216.3	4039.63	2351.47	4141.86	1930.36	4021.86
CYRIB	351.574		627.301	399.195	615.575	670.633	824.693		840.799	820.921	809.435	544.646	902.523	1004.75	1029.36	713.75	829.022	648.318	1247.33	878.038		1112.58			1393.66	1355.58	1485.04	493.613	989.85	74.9769	795.214		974.072	868.592	787.942		866.176	1014.34	336.407	893.054	751.06	1647.99	660.934	1265.43	894.581	1500.17	1164.48	558.168	873.992
CZIB	935.097	1160.64	1134.75	938.132	840.521	1182.84	1316.36		1177.45	880.259	2204.97	981.763	1260.26	1344.57	1442.89	1137.75	869.405	1433.2	1231.37	1158.34	1223.79	1272.61	1158.1	1593.32	1505.29	961.343	1283.34	1111.41	974.419		1232.08	838.663	1296.24	1284.21			1718.24	854.742	1075.39	838.342	1088.89	1064.74	676.227	1809.09	1096.98		961.021		1301.68
D2HGDH	1617.57	1452.81	1666.66	1273.74	1666.5	1324.8	1925.54	1274.55	1376.02	1085.27	1772.12	1970.53	1666.12	1547.37	1416.5	1857.62	1461.61	1407.87	1961.4	1091.53	1448.45	1550.25	1511.7	1277.38	1629.4	1683.83	1431.12	1810.49	1837.49	1588.1	1615.73	1430.54	1486.46	1645.51	2019.22	1570.1	1473.82	1662.5	1827.99	1081.8	1212.21	1348.67	1609.9	1527.53	1315.37	2606.76	1211.5	1511.36	1339.62
DAD1	2276.69	2522.02	1750.25	3794.48	3210.01	2517.52	2744.08	2303.21	3165.38	2480.87	2884.67	2432.24	2962.84	2746.73	2904.89	2884.33	2972.07	2086.91	3535.43	2566.47	2220.8	2805.84	3082.6	2386.13	3498.34	7709.43	3511.04	2280.67	3011.45	2475.92	2097.73	3822.61	3074.09	2940.38	3425.29	3273.32	2808.71	2096.63	1991.31	1780.51	1410.83		1595.87	1995.41	2469.63		2776.77		2571.85
DARS1	15672.6	16986.6	17014	17062.5	16675.3	17444.8	15977.5	17238.5	16215	17346.8	18776.6	19109.9	16620.1	17988.9	16632.7	18543.5	18342.3	16741.3	17853	16865.7	15367.4	18263.9	17724.3	18600.4	18276.3	15979.5	16491.2	17127.5	17430.7	18262	15532.1	17711.7	17012.6	18240.4	18349.5	17351.9	17408.3	17198	16686.7	16460.2	17335.8	17801	18515.5	15858.7	17205	18202.9	16551.4	18040.4	17336.2
DARS2	6587.04	7148.16	6836.12	6846.35	6962.1	8239.21	6876.38	7029.65	6431.01	7108.13	6873.57	7032.59	7608.07	6580.28	6460.19	6965.45	6805.33	6982.13	7106.42	6812.14	6124.45	6777.22	7705.14	7172.96	6712.53	5075.39	7265.34	6971.65	6982.15	5717.06	6202.98	7240.36	6764.55	7508.64	7530.73	6799.17	6834.5	6862.92	7231.52	7246.66	6618.46	8025.62	6997.84	7321.59	7518.05	7251.34	6880.81	7717.2	7079.76
DBI														1185.73	966.221		716.364	963.677	913.889				876.257		1380.36	24683.9			1770.71		1583.7	1390.36	1262.66			2326.53	1015.67					1533.14		681.751		1878.21		795.557	829.791
DBN1	867.074	1079.23	990.869	1024.26	994.071	917.325	1097.3	861.186	1507.03	1623.78	1365.09	778.804	930.558	919.182	1267.38	1193.9	680.726	1477.51	681.445	965.902	1298.28	1018.72	1501.76	1239.81	1099.76		1178.14	939.739	1574.21		1192.13	1179.57	1320.53	984.134	1134.44		1055.99	931.543	930.281	879.314	1133.61	956.462	796.247	1599.36	901.228		732.983		1352.94
DBNL	492.762	536.601	558.548	398.946	442.525	414.422			240.299	553.315	610.147	235.017	485.509		514.121		764.187	413.99	297.555			496.432		502.373	587.338	3728.1	283.927	418.66	162.762		405.304		587.095					136.732			352.397			424.47			113.404
DBR1	5055.53	5273.13	3144.1	5416.97	5358.38	5273.78	4448.14	6670.3	5254.21	5813.72	5130.31	6982.76	6781.91	3873.97	6125.22	4523.9	3834.09	4597.4	5018.52	6980.32	3907.75	5925.54	6682.14	4840.19	5219.65	3793.07	4126.91	4325.14	4287.96	5005.77	3597.16	5787.7	6341.82	5507.56	5124.66	5980.25	5165.64	4109.33	4536.97	6156.39	5267.9	5382.58	5616.53	3846.66	5596.22	5845.43	5734.55	5200.72	4758.38
DBT	353.174	226.081	122.024		271.355		207.013			253.317					346.029		180.95	319.822			225.848	354.469	331.174	531.339	128.32	221.115		179.692	372.058		260.288	338.509	617.213	458.896	592.929		441.22	518.1		151.944	67.7832	159.773	355.677	317.754	312.9		258.379		272.711
DCAF1	2564.71	2430.25	2918.95	2945.86	2610.04	3138.96	2282.67	3122.1	2280.04	2814.59	2694.34	3252.69	3142.76	2760.6	2549.49	2307.2	2824.48	2945.58	2875.92	2635.82	2689.67	3003.1	3164.96	2845.26	3017.3	2380.13	3233	2604.09	2654.08	2288.13	2836.2	2242.42	3018.04	2373.07	2932.85	3003.2	2816.12	3577.47	2740.61	2737.58	2933.79	3103.6	2608.01	2755.69	3147.35	2765.31	2586.01	5480.2	2829.83
DCAF11	1695.81	2052.43	1233.11	2139.58	1677.01	1393.12	1361.84	1376.49	1365.06	1938.15	2131.81	2255.05	2230.02	1917.04	2070.22	1458.93	2428.96	1371.92	2273.48	2679.71	1930.86	2155.08	2301.32	2069.83	1450.23		2162.88	1615.02	1876.43	2067.05	1781.6	1232.75	1545.65	1732.51	2278.13		1657.59	1808.29	1819.33	2318.54	2192.61	1832.43	1720.83	992.113	2787.19	2029.84	1391.57	2271.5	2238.02
DCAF13	1092.7	1036.35	990.512	1249.04	1173.24	946.933	1135.19		971.199	993.221	1130.28	1127.42	965.049	835.819	1211.4	1076.91	815.826	933.252	720.045	1490.18	887.099	1076.51	1201.86	903.909	1022.38	1028.76	1198.75	1520.95	1142.62	1391.16	1043.95	1278.16	1118.16	837.382	1791.08	1894.97	1415.4	1057.44	1790.97	1055.04	1453.41	1125.54	1329.48	749.711	1384.63	1908.86	1031.23	1878.76	1138.64
DCAF5	1258.79	1422.9	1335.94	1631.35	1017.76	1270.86	1271.23	1444.98	1200.21	1077.76	1291.15	1043.74	976.387	814.228	1133.13	1984.24	1325.55	892.646	944.263	1396.18	1349.13	979.001	1054.66	1022.61	1670.04	2292.42	1404.81	1489.06	1765.7	1212.61	1255.03	946.828	1422.84	2042.39	1266.01	1267.88	1031.19	1106.72	958.978	726.96	643.414	1663.85	1309.32	1293.59		1581.75	1174.97		974.634
DCAF7	3419.97	4469.59	3123.44	3791.92	3708.06	4085.59	3110.02	4584.28	4561.57	4865.14	5112.04	4249	4599.47	4252.77	3846.01	6007.75	3997.51	4032.98	3763.68	4654.05	3402.26	4251.97	3624.93	4555.02	4012.82	3414.2	3826.26	4066.52	4060.71	4689.45	3588.76	5203.33	4088.11	4877.63	4545.94	4869.45	4179.44	3681.78	3947.8	4661.24	3925.12	4792.57	3831.95	3738.1	4933.63	5446.3	4563.69	5839.21	4598.62
DCAF8	2254.54	1945.12	1890.76	2604.45	1998.56	2467.28	1735.77	2096.16	2447.9	2552.63	2484.88	2435.89	2402.04	2446.73	1849.66	2215.38	1503.34	2935.45	2395.42	3108.37	2068.45	2520.62	2560.35	2405.92	2434.5	1719.65	2836.3	3117.51	1980.08	2737.88	1632.63	3096.71	1862.07	3022.96	3848	1907.34	2558.09	2590.63	1744.81	2562.49	2792.77	2155.65	2557.06	2563.63	2749.37	2445.94	3087.1	2263.03	2287.73
DCD	2349.87	1381.53	527.418	443.516	414.7	504.571	290.396			812.034	939.792					475.01	230.43		469.437	982.81	1284.7		946.157			915.493	441.962			719.759		430.034	523.058	280.866	1379.01	565.424	445.866				231.972				3029.4	473.249	367.68
DCK	2051.82	1663.55	1722.92	1755.93	1158.45	1824.24	1723.76	1316.07	2056.3	1535.54	1660.47	1757.53	1276.24	1471.6	1583.68	1561.28	1742.38	1573.71	1591.48	1653.73	1289.57	1391.74	1688.91	1643.14	1299.2	1340.1	1483.08	1493.59	1147.36		1623.97	1279.18	2012.87	1997.61	1153.61	1638.79	1351.86	2145.8	1757.27	2076.09	951.087	2040.73	1350.18	2062.19	1397.88	1543.28	1624.66	834.17	1632.19
DCP1A	1384.86	1210.2	1671.07	902.226	903.727	1321.57	795.154		1054	965.178	1180.64	1246.39	1748.39	1312.78	1335.21	1200.32	1174.14	1098.43	2101.11	1199.19	991.102	1259.84	1842.89	853.835	1144.32	1519.61		1524.11	1309.49	1267.58	928.345	1212.32	1505.39	1451.45	1326.8	1415.48	1329.54	1193.05	1082.04	1380.78	1347.23	1493.15	1355.74	1178.04	1280.4		1176.78	1669.9	1342.64
DCPS	1853.07	1627.06	1666.15	1739.56	1511.26	1596.6	1483.93	2084.27	1651.02	1642.83	994.016	1204.18	1722.66	1469.35	1824.74	1356.15	1489.3	2169.24	1101.7	1931.71	2301.03	1209.2	2064.23	2052.83	1346.9	1800.32	1353.76	1814.91	1240.86	1113.63	1825.57	1523.91	1491.52	1469.85	1837.5	593.285	1686.22	1798.84	1701.56	1984.16	1327.02	1546.32	1430.29	1378.1	1375.97	1072.4	1448.47	336.736	1578.48
DCTD	1503.4	1695.07	1607.81	1623.12	1498.56	1418.25	1552.78	1931.65	1484.21	1572.44	1912.7	1054.76	1430.86	886.775	1444.26	1429.46	1730.5	1515.18	1655.85	1714.71	1382.81	1865.21	1848.32	1409.24	1968.45	1487.23	1640.74	1488.56	1244.95	2125.97	1257.12	1872.11	1608.08	1680.5	1940.93	3151.33	1714.34	1924.42	1907.2	1632.6	1565.27	1730.55	1767.37	1445.18	1757.78	1347.85	1315.7	1773.89	1462.41
DCTN1	3471.13	3153.48	3797.12	3410.81	3047.69	3588.66	3548.59	3180.37	2902.49	3722.81	3228.01	2881.64	3575.78	3625.5	3123.68	2768.5	3296.01	3280.08	3418.49	3305.11	3477.05	3603.73	3455.95	3106.11	3074.07	4148.96	3380.13	3399.39	3372.66	1639.99	3501.16	2904.8	3340.9	3606.11	3497.66	1832.51	3417.65	3797.89	3407.41	3716.57	3288.84	2734.37	3574.92	3698.35	3400.84	2269.27	3296.66	1500.13	3593.15
DCTN2							438.502												767.462			585.933				3377.6		496.442			834.793							476.491					215.036				541.876	1401.36
DCTN4	1556.55	1680.44	1272.26	2206.86	1819.99	1850.99	1373.91	1633.64	1524.73	1787.9	1658.49	1636.82	2141.21	1917.57	1639.45	2017.06	1397.84	1371.87	1494.37	1546.06	1170.06	1369.12	1799.06	1474.61	1791.8	2423.56	1809.9	1630.12	1728.8	1901.01	1120.31	1809.87	1108.21	1793.18	1372.5	1679.53	1811.62	1323.11	1378.16	1352.42	1906.06	1602.43	1813.11	1635.48	1526.79	2247.31	1618.71	1770.43	1694.58
DCXR	16673.1	22340.7	17913.8	20986.8	17290	24041.2	15980.1	22674.2	23753.8	24293.9	18220.6	19070.9	25121.4	20924.4	19988.1	18910.5	18364.6	22434.8	19452.5	20976.9	17335.4	18859.6	21378	22215.7	18279.9	13184.9	19386.4	24426.7	18517.1	13288.3	23803.6	20045.4	22092.2	16447.5	16153.7	11954.1	19201.3	23977.1	19432.1	22359.7	23644.2	21572.8	18761.2	24952	23454.6	11984.4	21159.2	12276.6	23400.9
DDAH2	556.358	1048.01	765.768	1379.34	1099.26	913.461	1046.71	1100.76	1804.23	1052.46	847.989	901.09	1038.13	1092.83	971.245	744.298	1354.64	938.093	1164.16	1012.59	1378.59	1141.43	1272.36	985.457	1273.51	2324.36	1255.79	1254.23	1034.56		1433.59	1260.05	1041.38	828.494	1582.72		854.003	893.008	1429.41	1458.2	1005.95	1251.15	1131.45	1196.3	1123.4	1109.09	919.857		1053.54
DDB1	9153.46	11243.1	7773.69	11117.6	9824.95	13218	8829.28	12833	13162	13339.1	12712.1	12925.4	12443.2	13499.2	13265.9	13174.4	12394.6	12341.5	12241.7	12514.3	8432.02	13456.9	11755.3	12922.1	12198.7	10830.5	12027.9	14013.4	12928.5	11628.8	10878.9	13985.2	12441	14389.4	13262.5	13852.6	10603.9	12160.7	10014.1	12353.4	14728	14587.2	13158.8	12423.9	14479.2	13978	12551.4	12897.2	13546.9
DDB2	2478.46	1757.53	1034.31	1470.05	1433.85	1797.09	1449.12	1281.93	1602.35	1809.55	1578.9	1260.27	1750.67	2688.3	2129.89	1823.21	1587.26	2316.8	2351.06	1785.99	1875.62	1650.14	2103.22	1676.92	1661.41		1588.29	2536.36	2407.36	1332.62	1994.68	1180.06	1719.61	1848.59	1237.11		2178.39	1837.76	1557.92	2325.31	1660.77	1678.16	2123.01	1231.81	1506.44	1645.88	2209.46	1493.12	1626.6
DDI2	1764.75	2073.07	1506.2	2003.67	1579.55	1640.55	1512.09	2747.84	1831.71	1590.73	1815.99	2172.66	2323.98	2025.22	2453.62	2297.36	2167.62	2186.25	2148.31	1904.28	2244.19	2144.75	2053.28	2058.2	2136.3	2257.06	2001.09	2234.31	2354.98	1401.66	1998.57	2388.46	1950.82	2413.53	1945.07	2801.46	2338.18	2173.1	2029.22	2310.87	1977.15	1872.46	1783.06	2745.15	2138.82	1456.75	2725.37	2163.47	2324.65
DDOST	25846.9	23473.6	23875.3	26212.7	27729.4	24329.9	21821.4	22345.8	26313	26637.2	25977	30532.2	25010.2	26326.2	27136.4	29250.8	26298.4	22875.2	25018.9	26800	21896.6	25446.7	24340.6	24693.2	27864	26966.4	28627.6	23712.6	27115	27746.3	23873.7	28022.4	27769.2	26396.5	27627.4	26849	24558.7	23462.2	25366.6	23246.5	26804	28788.3	23233.3	23849	25630.2	29826.4	26965.8	28825.8	25412.5
DDR1	1146.64	1092.06	1510.18	704.385	1051.55	1175.19	1490.32	1083.7	1113.29	1045.65	1789.48	1361.11	1153.77	1379.41	1048.34	1591.48	1169.01	1046.78	1277.56	1338.73		1254.27	1344.19	828.871	1606.69		1198.59	1565.83	1334.44	1177.69	1093.74	816.054	1497.43	1193.06	1016.31	1586.18	1604.03	1165.91	1047.44	1440.77	1218.22		1078.66	1474.04	1660.72	1101.74	1581.38	1817.32	1521.03
DDT	3994.11	2471.54	2461.74	2605.24	2770.3	3624.74	2397.91	2240.01	3412.34	3409.61	3587.3	4642.14	3273.95	3636.04	3787.87	3986.36	3571.04	5276.71	3709.67	4043.03	3779.78	4526.58	3734.81	5205.61	4410.71	5917.99	4184.88	2530.1	4344.56	1311.95	4843.37	3287.07	3945	4407.39	2845.7		4448.38	4115.36	2932.24	3855.27	2603.34	4256.58	2379.36	5004.31	4735.78	1837.94	3775.73	2206.33	4249.27
DDX1	8405.14	9978.98	7510	9496.35	8435.87	9678.94	7544.71	10478.4	10908.7	10975	11110.5	9704.35	9716.56	9225.79	9853.76	10375.6	10358	10073.3	9433.94	10249.6	10103.1	9364.04	10355	10695.6	9715.88	9277.99	8955.21	10368.1	9555.24	8868.8	8559.99	10855.4	8556.61	9931.11	10380	8744.96	8775.67	9943.29	10083.1	11058.9	11043.4	10465.6	9341.99	10397.8	10097.7	10249.3	10468.9	9703.18	9507.91
DDX17	3931.37	4129.13	3706.04	3953.99	3835.83	3733.78	3473.27	4071.26	4037.09	4005.71	3662.98	3529.89	4073.37	4058.75	4166.91	3339.86	3749.56	4664.78	4261.9	4308.8	3925.89	3471.8	4397.01	3884.57	3909.92	4406.45	4129.82	4006.97	3905.53	2835.19	4424.62	3660.97	3357.35	4027.83	3185.43	2779.4	4147.11	4563.33	3680.39	4021.72	4263.85	3174.52	4145.19	4203.35	4296.32	2533.07	4474.76	2761.46	3590.74
DDX18	850.151	948.96	1004.48	671.955		1040.81	1071.26	1395.03	637.989		905.834		909.559		983.217	1403.56	931.198	744.847	1028.07	759.358		970.601	1113.56				756.755	674.794	912.799		1312.68	874.712		529.679			758.641	897.873	783.063	651.585	1302.2				970.004		1308.21	1943.4	1172.65
DDX19A	138.822	245.379	114.52	158.077	94.271	259.346	194.16		202.01	256.258		233.209		88.9675	106.071		366.578			103.808	203.813	58.1073	224.831	364.393			228.705	217.441					25.8474	142.923				190.225	69.8657			267.778		123.639	260.141		191.267
DDX20	6054.13	6963.83	5949.21	6641.62	5484	5797.8	6553.53	6132.9	6114.8	5833.08	6428.02	6217.6	5039.51	6006.35	5813.31	6092.5	7270.04	5906.21	6064.41	5489.39	6185.31	4588.56	5845.7	6043.02	5041.74	4596.35	6301.81	5271.7	6537.85	6062.19	4861.49	5753.18	5628.31	6001.74	7211.73	5718.56	5811.15	5390.99	6396.02	6354.98	5507.71	6167.22	4672.38	4109.09	5579.3	6266.46	6567.18	5992.19	6205.23
DDX21	14843.4	10488.7	10007	7386.16	10432.5	9307.45	9574.33	6564.82	10558.1	9010.59	10427.1	8170.67	10119.7	7947.88	10492.7	8136.68	9708.73	11057.3	9919.86	8171.58	9762.05	5141.19	9940.45	8197.54	10418.2	6504.49	10832.8	9961.84	9526.18	6199.12	11936.1	8055.59	11723	9892.5	8609.56	6071.01	10569.8	10215.9	9280.77	8336.73	8971.57	8921.16	11926.3	10418.8	11127.5	6736.32	10775.6	6764.73	9599.73
DDX23	1979.51	1235.86	1524.08	1696.5	1528.8	1121.34	1078.21	2804.99	1043.88	1527.77	2113.86	1674.91	1882.84	1040.7	912.784	1924.95	926.716	1599.1	1822.86	1193.92	1538.9	1067.09	1639.59	1210.49	967.763	2525.51	1526.54	1141.88	1618.17	2021.65	769.06	2109.77	1668.87	1550.8	2153.22	1709.01	1873.77	1572.23	1399.51	1226.21	1567.07	840.98	1787.18	2071.57	1663	1812.59	2009.93	1800.01	1795.48
DDX24	1237.09	1303.31	1194.93	800.879	1071.25	1139.04	1261.53	998.74	1582.39	1201.29	1001.71	1008.48	1290.98	930.349	916.817	773.475	1370.79	1029.12	1256.28	1171.46	864.789	673.043	1074.47	714.862	1124.88		1116.32	1327.8	1135.52	970.138	858.949	1044.64	1123.85	1378.35	925.916	502.989	953.543	1082.48	1376.25	1005.34	878.704	807.561	981.264	998.514	1049.41	757.179	1139.24	1220.25	1061.42
DDX27	1817.88	1284.11	1260.86	1464.68	1286.33	1350.51	1708.24	1570.12	1139.05	1110.73	1134	1388.08	2118.55	850.65	1132.59	951.901	816.206	1098.3	1489.2	855.109	1201.36	647.921	1500.72	675.445	1351.09	1171.98	1357.87	1367.3	841.15	2088.63	1557.56	1179.59	816.191	1263.46	1034.4		1183.55	1398.17	938.826	1134.24	1125.61	976.649	1758.5	1518.62	973.776		804.387	1045.08	749.707
DDX39A	6212.85	8580.2	6936.4	7874.83	7593	8198.48	7011.87	6537.4	6294.05	7338.51	8110.7	6741.68	6254.49	6771.48	6740.99	8894.51	7314.45	7625.58	5951.3	7618.89	5894.84	8014.53	6916.6	7829.56	7186.65	5780.93	6932.12	7122.25	6762.17	7730.99	6316.91	8241.48	8509.27	8102.96	8590.96	6989.53	7426.95	6944.8	6867.07	7278.87	7216.5	7097.27	7190.63	6850.03	7186.85	7507.81	6380.89	7218.56	8003.16
DDX39B	7016.37	7627.64	5748	7516.42	6615.2	7038.28	6459.88	6263.8	6901.71	6834.18	6433.88	7110.5	6183.52	7083.61	6191.54	6444.4	7175.5	7136.47	6051.36	7242.93	6962.83	7005.55	6869.38	7362.51	5613.38	6948.85	6073	6313.61	7064.83	6427.48	6041.68	6944.73	7140.43	5855.24	6440.21	5474.93	7981.2	6786.51	8228.25	7182.55	8129.81	7122.51	6696.67	7135.79	5539.71	6415.23	6878.2	6460.48	7675.14
DDX3X	5456.75	5969.73	4715.13	5502.96	4545.2	6485.69	5122.74	7260.73	5040.95	5168.43	6259.26	5175.94	7474.06	4995.89	4962.22	5158.25	5950.51	5561.95	4243.3	5388.78	3832.97	5884.68	3333.03	4174.28	7022.92	12528.5	7131.57	5253.28	6388.71	5526.97	5359.47	5146.39	4639.24	6147.53	6109.45	3760.01	5954.81	5793.56	5898.06	6032.57	6437.36	5259.83	4771.14	6695.68	6309.41	5644.21	5791.36	5157.96	5100.88
DDX41	1524.87	1455.62	2044	1527.22	2145.78	1513.96	2100.3	1708.45	1589.27	1865.2	1914.92	1441.89	1369.69	1621.14	1648.81	1612	1495.49	1546.98	1646.8	1338.69	1534.6	1169.55	1958.8	1339.36	1647.75	2004.46	1972.09	1536.26	2312.37		1704.91	1745.02	1759.35	1826.92	2131.99		2031.26	1782.08	2174.94	1781.47	1590.44	1744.74	1735.61	1977.94	1776.83		1582.68		1804
DDX42	2183.27	2338.13	1873.55	1845.72	1780.31	1715.65	1994.61	638.328	2162.53	1975.48	1552.14	2038.42	1735.54	2010.29	2532.58	2484.54	1748.77	1887.43	2386.65	1684.84	2296.29	2234.03	2020.54	1953.27	2525.12	933.29	1598.55	2109.9	2227.73		2276.29	1825.56	2633.42	1895.75	1649.94	1374	2729.14	2549.56	1748.36	2024.64	2062.01	2683.83	2287.56	2457.73	2267.69		2559.44	1839.61	2276.61
DDX46	2375.31	1941.71	1892.81	2327.9	1611.36	2242.51	1809.85	2024.71	1682.36	1449.89	2170.72	2592.92	1482.59	2278.1	2545.34	2319.93	2491.12	2182.2	2709.07	1417.61	2562.32	2234.63	1821.61	1670.14	2609.63	3215.68	2338.49	2705.64	1615.24	3058.19	1641.5	3144.13	1735.19	2068.81	2738.18	4214.79	2815.38	2081.74	2330	2386.49	2232.78	2139.47	2370.36	2101.14	1734.66	2969.29	2797.41	1777.66	2172.45
DDX47	873.586	734.896	1299.19	727.581	890.38	793.245	827.486	756.244	702.422	727.881	603.805	869.479	1095.14	726.328	826.794	1683.94	732.52	1062.51	422.485	776.228		884.561	718.621	823.233	636.276	305.666	948.612	1206.39	562.665		1129.54	674.582	1065.12	684.611	582.585		882.233	618.547	982.248	778.371	817.063	850.608	998.278	1442.7	1360.02		666.949		664.803
DDX49	519.777	667.802	938.149	443.362	592.092	844.139	1065.84	508.233	516.204	389.385			927.031	689.854	587.945		550.237	581.001	1333.38	555.668		448.874		872.783	747.083		1299.6	314.438	818.62		808.038	677.3	473.934	406.273			886.618	900.596	765.304	513.737	597.068	1194.35	754.868	1027.45	798.757	574.689	614.498	990.212	736.816
DDX5	27772.1	22391	24154.4	21852	21306.7	22232.9	22715.1	19960.9	27333.8	21831.2	22603.8	21104.6	20279.7	21294.6	21538	18807.9	21664.9	22276.3	24197.5	20575	22408.2	20079.1	25078.3	21383.4	19922.2	16635.6	22853.5	22312.8	20160.4	15144.8	22394.3	18338.1	19957.9	20353.5	17836.1	12448.3	20848.7	21466.8	20496.8	20527.2	21016.9	18893.1	20145.3	20018.2	22512.2	14231.5	22771.1	14115	20716.3
DDX50	1435.37	785.009	1125.86		827.533	398.276	669.089	488.353	765.288	485.626		458.162	576.151	208.287	662.616		695.741	620.038		509.931	432.224	450.537	819.053	592.495	472.299	391.142		1006.06	1134.82	478.066	1319.85		743.759	489.214			551.278	495.952	478.066	254.312	558.69		424.287	949.372	868.013		528.341		530.493
DDX52	699.531	697.173	468.693	535.854	417.728	1047.91	838.684	889.812		734.621			1200.28					565.271	646.014		1298.74			280.232			539.659	314.255			460.089				957.652		725.719	464.766		614.453			599.123	881.907	494.444		595.247
DDX56	1223.48	764.545	1224.29	862.479	657.793	812.305	702.425		682.121		1028.15	396.13	1259.85	832.318	764.712		645.977	1027.86	328.259	431.044		488.482	602.966		528.337	731.965	1184.75	354.574	623.143		1383.5				643.514			797.696	925.673			842.929	1088.12	930.386			979.083		847.396
DDX59	908.276	1200	1383.63	533.546	1100.66	825.436	1115.26	1196.19	812.691	932.494	1001	1259.04	1083.18	1019.03	929.403	534.354	1015.96	1205.58	1107.58	1080.66	1110.93	787.383	1685.86	670.882	898.792	477.821	1043.08	989.721	1230.86	1047.79	1287.49	580.555	1388.34	1115.1	877.4		1057.04	1305.98	1097.73	750.196		972.12	887.61	1178.46	1333.5	929.212	1064.18	468.436	822.877
DDX6	28720.3	25720.9	26175.5	27872.6	27698.5	29552.2	28010.3	27019	26316.3	22867	25739.9	25671.9	22552	24814.2	25632.6	25053.1	26883	24331.7	27628.8	21852.7	19294	25621.3	26897.1	25939.5	24108.5	19927.6	25573.6	26944.1	26505.6	20994	25134.4	25290.8	24833.1	26962.3	25284.3	20481.9	24353.3	24907.8	24285.5	26633.4	24094.6	24257.4	27007.1	26027.4	26035.6	23863.2	24691.2	21854.4	25820.3
DECR1	7308.54	11078.1	7016.55	7097.94	6545.29	9434.17	7530.27	9112.94	11745	10508.1	11102.2	11174.8	12208.1	11420.7	11724.4	9135.97	11547.5	12561.9	11238.3	12217	8900.62	9432.44	10007.2	10013.9	9459.44	10629.6	9033.63	11659.9	8647.39	7253.62	10713.9	11691.8	9515.24	12211	8927.8	10436.9	9788.3	12232.7	9245.3	11384.5	14165.3	14077.2	10138.1	12365	11449.8	9261.16	12445.9	6376.86	10735.4
DECR2	1821.71	1879.73	2025.36	1685.95	1388.22	1673.9	2045.03	2158.53	1332.91	1805.33	1643.23	1456.37	1322.86	1815.51	1628.71	1854.89	1534.57	1790.11	1601.48	1711.74	1830.06	1881.37	1995.11	1702.03	1776.64	1538.71	1426.58	1686.05	1397.85	1399.87	1435.31	2128.3	1327.59	1367.58	1880.95	1716.78	1836.89	1812.14	2120.45	2049.36	1621.32	1594.69	1818.62	1762.48	1506.98	1258.44	1229.07	1252.25	1724.56
DENND11	763.484	285.868	568.745	559.491	520.028	214.55			634.368	443.873	466.815		684.302	576.611	531.912		589.811	346		692.975		158.862		347.585	326.984		289.754	409.022	378.213				505.517	497.802				402.602	613.264	452.482		522.061	545.536		280.706		395.915		345.803
DENND3	1611.51	1137.6	1808.29		2830.19	2539.38	2526.69	3032.18	2917.35		2472.87	1451.49	2071.24		1119.15	2373.3	1593.02	2146.88	1452.64	2370.22	2533.57		2093.42	2244.17	2411.72		1006.76	2178.82	1663.27	3263.34	1543.17		2286.13	1552.87	1946.94	2869.37	1195.82	1288.54	2467.76	2615.34		1570.55	1961.66	1426.47	2004.23		1530.42	4077.25	1948.05
DENND5B								1260.9			521.897					760.644	275.79		418.161	284.307	353.965	242.169				631.847		178.589				357.979	583.313									210.349	288.186		356.967	483.13			266.806
DERA	1152.84	1237.82	1354.58		1506.78	1293.68	1149.93	1015.12	859.638	1002.6	1263	1105.04	692.98	898.993	877.18	593.125	687.209	996.086	570.058	1266.92	955.289	1854.65	1101.77	1034.65	1196.15	4122.96	562.353	1025.1	695.088		1443.18	682.237	1125.96	620.882	839.685		1108.25	1196.23	1274.98	932.854	1026.82	943.694	890.414	1127.52	1179.29	380.559	699.737		970.399
DERL1	11524.7	11249.3	12877.7	10787.7	12309.8	10428.8	9356.94	6510.39	9323.82	9203.6	10525	9239.83	9786.66	8605.8	7812.57	10587.8	10547.4	8554.77	10741.3	9089.25	6629.54	9098.64	10977	8851.14	9085.88	6961.45	11511.3	9286.12	10313.4	7064.73	8876.18	9205.93	10636.3	9172.65	10945.4	7653.24	11116.6	9016.95	8827.28	7337.81	9317.07	10102.8	11070.9	8625.09	8568.06	7507.41	8458.44	8903.82	8885.03
DERL2	4294	4348.2	3668.64	4103.19	5071.07	4529.32	3764.62	4742.96	4398.31	4671.61	3943.76	4285.13	4730.58	4912.84	4046.57	4404.35	3189.73	4156.99	4601.92	4374.87	3388.93	4407.61	3953	3634.67	4582.04	3469.44	3995.59	3593.25	4292.92	6512.61	3788.78	4145.27	4128.76	4596.09	5763.23	4606.36	5539.02	3506.19	4479.2	3404.19	3408.85	4123.53	4065.68	2874.13	3062.19	3342.33	3713.12	7818.05	4112.13
DHCR24	1994.95	2856.91	1751.66	2801.61	1930.74	2291.69	1545.76	2481.49	1887.36	1984.03	2879.85	3961.05	3099.9	3120.57	2768.6	3043.97	2869.84	2852.84	3996.69	3791.14	1401.43	2719.32	2565.13	2745.05	2638.58	3225.64	3326.66	2887.32	2802.13	2837.03	1871.1	4192.51	3015.82	3053.78	2675.29	2360.43	2657.51	3051.83	2373.38	1912.77	2154.28	3117.39	3022.42	3474.1	3066.28	3110.3	2292.29	2902.1	2403.91
DHCR7	7149.83	5961.43	6059.22	8228	7387.08	5736.13	6871.92	5942.68	7277.95	6989.48	6634.06	7688.44	4317.21	5984.55	6915.13	7851.24	6148.2	5758.4	6623.12	7619.72	2735.4	7482.68	5241.19	7394.39	8166.9	6296.29	9038.64	6245.82	8299.2	6331.93	6778.07	9030.87	7449.2	8701.13	8505.23	6931.29	6798.87	4791.42	5658.11	7049.9	8394.51	7962.09	8020.37	7234.25	7539.88	8605.06	7099.3	7499.38	7828.85
DHFR	10891.1	11391	10430.4	10866.8	11853.6	12321.9	11517.3	9865.67	12293.8	11111.2	9649.83	10224.5	10094.2	10006.9	9626.78	10503.4	10320.3	10928.5	11630.5	10227	10836.5	12007	11075.3	12181.2	10265.6	9296.06	8749.51	11030.8	10359.1	12132.8	9214.11	11325.4	10161.8	11645.4	10736.4	11525.5	10620.1	10716.1	12926.1	12955.2	11627.2	9656.98	10251	9809.84	11830.5	13558.8	11284.9	11628.1	11272.7
DHODH		1020.93	553.552	565.09	744.46					447.096		591.409	874.431	1036.84	909.959	661.636	319.208	1186.24	438.096	608.903	787.113	774.982	768.044	523.925	515.987	998.757	501.298	660.538	672.751		334.033		293.96	662.446	467.561		619.551	751.419	635.221	449.177	443.162		572.91	724.031	367.511		928.523		404.907
DHPS	2108.53	2389.04	2125.59	2349.31	1947.22	2714.86	2164.83	2868.92	2960.59	3076.35	2389.03	2793.33	2528	2271.69	2463.23	2360.69	3254.73	2743.32	2246.9	2372.09	3964.87	3356.47	2879.42	2978.71	2088.36	2506.09	2291.55	2037.49	2098.5	1825.63	2180.17	1437.71	2420.13	2402.02	2288.21	1529.03	3023.95	2274.83	2541.5	3313.65	1849.38	2398.19	2082.78	3017.91	2134.1	1831.33	2602.87	1581.87	1817.76
DHRS7	1272.4	1008.67	1116.54	667.165	1109.69	801.605	778.779		1364.34	882.585	724.235		977.649	1674.98	1400.35	848.346	865.832	976.088	1173.5	1469.98	1691.07	837.184	927.164	1080.85	1131.5	3496.08	1266.66	1227.37	823.189		1294.19	942.393	926.332	1057.75	1282.23		1773.22	924.836	895.433	834.671	1330.91	813.108	695.355	1236.47	1005.08		1307.78	1142.63	878.497
DHRS7B	1193.27	1527.58	1741.63	1900.24	1231.85	1437.79	1503.95	1601.32	1430.63	1213.59	1681.71	1708.17	1744.33	1390.29	1206.34	1267.88	1073.66	1538.11	1329.54	1323.3	1177.8	1443.97	2068.51	1505.93	1577.42	1712.34	1615.81	1520.34	1378.04	1685.11	1035.48	1221.17	1749.76	1315.91	1564.83	1375.78	1607.52	1292.04	1937.74	1542.84	1577.65	1316.36	1286.24	1300.75	1410.32	1231.47	1283.73	1546.14	1365.13
DHTKD1	3220.2	3810.48	3121.82	2770.7	3415.98	3609.92	2902.19	3926.01	3393.82	3536.76	3507.44	3349.74	3290.59	3302.94	3545.29	3665.87	4087.71	3832.12	3183.21	3805.65	4109.6	3245.9	4129.42	4200.84	2997.64	2095.65	2894.81	3339.99	3025.11	2574.31	3335.03	3186.2	3716.48	3376.81	3369.91	3547.98	4003.85	3792.91	3955.62	4052.07	3280.55	3462.92	3225.81	3103.61	3219.05	2696.56	3480.11	2071.09	3762.74
DHX15	11980.7	10656.3	10700.7	9271.28	9361.33	9038.69	10635.9	8600.7	9937.88	8531.48	9625.09	9414.86	10686	9649.7	10131	10589.7	9344.35	10040.1	9199.9	10317.4	8527.99	8923.77	10859.8	9433.43	9030.92	8660.37	10107.6	9620.61	9729.76	8333.61	10890.8	9393.5	10290.1	10727.1	10134.1	8397.59	9606.99	10324.4	10213.2	9068.4	10687.2	9765.01	10112.3	10363.9	11530.3	8547.62	10350.9	8378.54	11040.5
DHX16	3740.77	3798.77	3713.99	3292.93	4046.45	4019.61	3143.94	3300.35	3898.09	3678.16	3577.57	3558.72	3547.03	3131.94	2774.94	3322.5	3000.19	2818.34	3134.22	3219.48	3186.38	2895.68	3395.15	3211.12	2977.91	2870.72	3337.79	2883.7	3365.01	3295.62	2914.98	4086.44	3114.14	3225.12	3490.79	3410.54	3096.06	3190.4	2900.71	2942.23	2571.79	3218.23	3747.63	3524.15	3637.45	3860.87	3497.24	4155.26	3370.81
DHX29	2995.12	3332.26	2838.26	3611.89	3116.26	2843.48	3387.06	2439.51	3036.13	3179.93	2929.31	3599.51	2886.47	2996.17	3155.41	3729.28	3704.84	2975.61	3034.58	2800.7	2466.77	3241.02	3481.08	2936.28	2856.92	3012.96	2601.99	3375.38	3347.5	2789.24	2917.81	3016.49	2853.07	3162.43	3069.64	2182.03	2687.81	3036.93	3687.75	2917.76	3746.96	3403.51	2810.98	3507.72	3150.56	2821.66	3288.03	2392.57	3197.5
DHX30	2689.36	2724.43	2685.81	2850.37	2665.73	2750.56	2886.03	2645.27	2392.28	2946.19	2803.33	2368.8	2733.42	2445.5	2821.16	2335.37	2834.25	2701.39	2786.69	2625.06	2883.27	2442.73	2665.03	2756.83	2473.49	1920.26	2419.98	2526.77	2510.15	1836.52	2767.68	2269.97	2759.45	2672.45	1970.85	2274.28	2932.26	2784.29	2619.42	2352.3	2376.04	2357.93	2316.75	2512.82	2192.49	2615.62	2478.59	2190.18	2370.41
DHX32		220.173	488.533	440.258	397.36	436.338	427.909		423.439	495.672		430.639	224.828	507.281			371.544	215.111		345.157		454.775		464.877	502.329	311.968		640.655	394.746		455.114	396.434	268.804	218.815			397.749		290.275	314.733	311.415	211.957	185.413	351.505	285.603			685.882	500.794
DHX33	658.551	535.631	713.413			733.627				466.662																			364.992		402.062							656.516	656.235				318.647
DHX36	2209.57	1988.84	1822.64	1726.82	1832.31	1814.52	1736.62	1891.6	1996.23	1976.46	1972.22	1651.96	2163.24	1914.3	2359.46	1770.19	1642.59	1755.42	2078.8	1527.78	1864.28	1590.51	2074.71	1659.88	1718.06	1256.08	1926.14	1974.31	2101.65	1547.76	1843.43	2009.7	1990.61	1994.04	1652.14	1054.92	1893.28	2150.54	1923.9	2022.27	1735.41	1820.25	1962.13	1877.39	1754.45	1488.23	1803.45	1701.1	1763.21
DHX38	1740.16	1756.52	1573.01	1805.98	1525.09	1689.27	2239.38	1838.62	1952.29	1436.29	1417.32	1575.44	2028.15	1894.46	1946.4	1792.48	1876.32	1865.19	1891.84	1878.61	1545.35	1631.62	1965.59	1695.73	2259.52	1503.99	1284.35	1904.44	1634.71	1530.6	2447.73	1369.09	1841.37	1422.04	1302.71	1414.66	2290.73	2105.17	1596.05	1340.55	1578.7	1860.75	1292.59	1534.25	2072.05	1505.95	2056.87	1204.5	1831.17
DHX40	1210.88	1065.88	853.885	943.878	1181.04	1411.52	1197.83	896.537	1125.68	863.365	1157.43	1515.98	1440.81	918.726	985.819	1269.26	1011.61	1112.64	1229.8	1266.06	1191.23	1001.01	1686.78	1324.93	1361.01	1004.3	1219.94	983.92	919.616	1551.45	795.477	1218.41	1435.3	990.725	1963.38	1396.85	1511.26	1064.44	1086.04	1468.06	974.071	1319.16	981.928	1224.8	1193.59	1211.12	1319.44	1830.22	907.186
DHX57	1491.43	1451.49	1250.91	1408.56	1094.43	1513.12	1503.79	1480.95	1234.33	996.803	1238.48	1176.52	986.333	1139.19	1373.66	1190.86	1143.37	1292.7	1588.17	1143.89	1210.38	1408.43	1425.9	1462.15	1713.3	1109.26	942.142	1134.99	1239.51	1364.88	1719.21	1519.04	1186.53	1310.41	1356.92	883.961	1428.41	1250.81	1384.68	1523.9	724.58	1085.84	1328.21	1128.97	1381.06	1152.61	1332.5	976.718	1486.88
DHX8	694.39	533.246	671.615	322.017	389.587	607.552			885.777	375.014	573.019	621.153	568.892	448.192	612.864	974.147		402.027		409.147			727.8			579.009		874.866				1151.2		627.495	566.903		1010.75	638.673		373.29			529.568	409.797	769.065	422.978	593.59	538.021	379.875
DHX9	15672.8	16488.5	15577	16347.5	15807.6	16048.5	15368.4	15298.6	16347.3	15857	15749	14788.3	14523	15213	14923.3	15623.8	15661.6	15643.9	15012.9	15438.3	13255	15490.6	15454.4	16258	14575.4	12834.1	15753.8	16025.9	16217.4	12022.4	15752.8	15149.9	16018	15520.8	15409.1	11599.5	14876.6	15938.3	15265.9	15436.7	15779.6	15455.9	15616.6	15838.5	16011.7	13551.6	15656	12168.9	15178.8
DIAPH1	4404.15	4621.63	4948.65	4679.2	4461.27	4509	4416.65	4863.76	3925.6	4250.69	4110.89	3832.83	4180.21	4046.08	4507.3	3335.15	4610.49	4876.08	4350.53	4436.23	3715.12	4035.09	4755.61	4490.55	4143.97	3479.46	3921.9	4537.82	4780.87		4672.46	4112.12	4063.02	4611.47	4306.9	1546.93	4470.76	5225.01	4411.97	3860.73	4041.92	3686.08	4583.19	4493.21	4154.55	2133.72	4832.69	1864.2	4603.37
DICER1	1434.49	1317.92	1306.65	1452.23	1594.17	1415.74	1471.55	1567.23	1371.46	1525.86	1531.04	1373.99	1852.8	1606.03	1439.99	1542.99	1421.94	1512.37	1476.2	1368.37	1622.81	1395.83	1615.1	1503.9	1609.97	1219.75	1881.38	1550.16	1216.69	1347.61	1410.56	1617.19	1185.39	1637.07	1841.9		1565.44	1218.52	1536.14	1523.16	1503.86	1587.94	1522.25	1330.72	1485.61	1099.37	1606.11	1222.13	1453.55
DIMT1	3467.81	1726.08	2505.83	1372.64	2176.39	1916.28	2064.92	1430.77	2139.8	1474.84	2000.27	1139.13	2205.67	1436.69	1562.34	1915.49	1828.12	2162.92	1573.57	1440.97	1664.82	1261.03	2116.51	1160.64	2007.77	1111.28	1948.1	1966.56	1924.54	2058.5	2427.45	1412.58	2303.03	2076.56	1632.63	1888.35	1362.51	1842.98	1418.69	1006.26	1673.83	1293.54	2052.16	1795.33	1978.72	2386.48	1904.79	2003.6	1718.21
DIP2B	1729.1	1604.3	2000.16	1520.5	1451.2	1513.66	1655	1855.23	2007.27	1662.22	1626.35	1506.38	1780.43	1737.8	1573.36	1515.36	1973.76	1542.14	1361.22	1914.68	1503.73	1603.73	1612.69	1394.54	1591.8	3478.73	1372.77	1808.98	1896.54	1577.86	1487.53	1900.12	1867.59	1687.27	2107.89	2040.86	1532.98	1605.44	1858.28	1719.21	1368.22	1885.37	2376.97	1379.1	1738.34	2408.13	1764.6	2144.73	2197.06
DIS3	4731.75	4326.65	3811.89	4498.28	4481.07	4354.84	3560.58	3299.84	4335.78	4257.56	4422.98	4203.32	3778.23	4422.14	3500.26	4294.98	4230.26	3936.65	4493.65	4084.21	4133.86	3781.31	4246.05	3888.3	4005.39	4174.22	4429.4	4229.3	4034.26	4177.45	3815.17	4970.72	4037.58	4508.65	4538.08	3865.23	3678.1	3974.66	3894.77	4055.17	5078.9	4011.84	3902.81	4168.62	4946.63	3724.69	3634.72	3250.05	3650.44
DIS3L2	584.113	305.284	593.977	704.004	730.984	652.744	538.415	929.822	766.449	485.588	611.875		425.954	430.02	543.52	866.359	640.911	678.578	599.833	662.052		651.305	568.039	841.808	973.452	351.649	760.416	480.182	665.877	936.529	466.746	895.701	758.053	611.922	659.929		646.869	486.983	659.396	445.494	741.076	453.028	993.024	670.771	715.335		598.138		378.462
DKC1	2925.82	1761.52	1864.03	1978.62	2426.25	2234.01	1715.91	1587.1	3007.23	2131.23	2083.7		4341.68		1815.05	1935.44	1983.46	2206.87	2056.31	1706.68	1163.62	1422.76	1837.2	1788.8	2034.13		2238.12	1856.57	2452.18	1968.59	2141.8	2166.4	1912.03	2758.75		2466.75	1295.71	1641.58	2023.54	1725.79	1419.08	2229.4	2223.86	2367.97	2208.76	3071.47	2200.87
DLAT	1790.68	1982.83	1652.34	1896.2	1676.58	1834.62	1439.96	2535.99	1979.15	1953.47	2282.18	2163.58	1847.6	2033.33	1812.55	1742.06	1832.76	1994.15	1811.94	2054.09	1918.25	1930.97	2453.36	1471.14	1888.08	1970.49	1780.05	2400.43	1636.66	1514.46	1679.64	2058.62	1824.75	1766.77	1487.11	1218.88	1836.84	2341.63	2086.01	1862.87	2300.23	1911.43	2227.56	2312.15	1921.22	1948.83	1844.23	1779.19	1943.78
DLD	5475.99	7886.83	5957.04	6890.45	5759.48	7221.24	5428.21	8653.85	7670.25	6783.34	5750.12	7203.5	8091.26	6907.42	6207.76	7771.16	7718.46	8342.1	7307.02	7660.68	8098.67	7214.58	7861.94	7686.38	5585.3	5619.55	6293.01	5998.02	5888.24	6929.37	7457.03	5980.56	7322.4	8120.67	9052.45	8744.15	7500.68	7075.99	8416.1	7136.18	6485.02	6192.74	7691.43	7394.5	6126.95	8252.19	8197.17	7861.2	7621.97
DLST	3255.31	3455.58	2849.46	3818.43	2542.6	3259.09	2792.15	3844.41	2973.68	3334.02	3438.6	3048.23	3413.27	3559.53	3181.17	2542.48	3294.97	3502.51	3423.52	3407.84	3706.81	3394.98	3530.78	3636.15	2502.59	3489.82	2961.71	3332.76	2929.34	1313.47	3522.03	3548.08	3390.14	2728.54	2403.45	3529.78	3578.22	4518.99	3378.74	3935.6	2429.93	2626.12	3034.95	3886.03	3535.51	2106.1	3596.98	2773.46	3233.18
DMXL2	361.891	642.575	847.653	949.776	457.652	851.17	461.403	751.835	582.383	592.154	311.292	490.816	474.464	543.361	565.333	326.646	321.251	326.157	913.459	726.376		597.333	619.177	283.069	332.773		704.5	344.551	553.383		501.748	498.625	392.746	777.78	1121.27		801.197	759.937	579.75	509.509	599.713	666.777	510.433	530.86	750.6	312.466	639.587		763.299
DNAAF10	1782.49	1814.95	1808.82	2145.66	1704.34	2524.62	1872.39	2003.93	2253.77	2189.86	3075.8	2252.92	1831.96	2327.49	2069.63	2094.52	1981.24	2004.61	2262.72	2240.92	1430.88	2105.27	1860.89	2549.63	2587.34	2053.01	1931.49	2167.54	2404.75	2774.07	1680.11	2203.5	1732.19	2543.35	3318.61	3113.39	1992.62	2050.56	2074.71	2068.12	2332.38	2658.12	2244.72	1455.58	1876.02	2905.94	2272.62	2210.64	1842.03
DNAAF5	2412.16	1982.85	2375.09	1921.84	2513.38	2729.23	2978	1885.76	2472.26	2316.7	2220.83	1690.7	3465.79	2398.91	2414.34	2171.52	1976.13	2514	2266.09	2481.49	2110.08	2235.15	1978.64	2237.25	2591.15	1215.56	2586.4	2419.62	2379.74		2825.29	1676.01	2709.26	1942.84	2074.07		2720.23	1768.39	2250.51	1838.11	1952.16	1604.27	1409.78	2211.31	2519.58	516.164	2877.18	711.127	2341.53
DNAJA1	2718.13	2981.33	2522.83	2986.08	3402.79	2888.02	2614.15	3040.98	3528.23	2996.84	2950.37	3373.39	2674.01	3439.89	2990.69	2864.04	3025.66	2964.28	2988.71	3171.52	3381.9	3285.83	3126.71	4005.99	2778.79	3781.42	2972.09	2737.02	2325.03	3253.41	2421.72	2544.67	2419.22	2604.54	2535.82	2202.13	2852.94	2887.95	2681.79	2940.31	2389.15	2316.66	2791.98	2850.31	3135.97	3061.56	2481.93	3476.59	2681.92
DNAJA2	1351.19	1465.54	1307.09	1683.91	1831.91	1459.58	1292.09	1568.84	1848.71	1729.7	1978.94	1888.12	1563.79	1633.26	1564.83	2145.06	1660.45	1651.81	1832.88	1717.64	1437.56	1673.35	1833.36	1996.09	1860.86	2402.58	1773.94	1805.98	1261.06	2044.42	1552.31	1941.9	1359.49	2056.84	2082.62	2546.67	1194.96	1728.33	1573.23	1775.07	2144.03	1813.13	1680.81	1731.32	1799.77	2040.07	1869.82	2113.69	1979.06
DNAJA3	5472.02	4588.5	5935.61	4888.26	5206.15	5104.77	5240.43	3764.69	4589.38	5107.32	5517.4	4991.38	5151.8	5826.61	4793.3	5668.66	5075.1	4754.06	4262.36	5359.14	6401.84	4674.21	5624.06	4779.39	5054.23	3679.87	4643.1	4761.68	5451.43	5522.75	3664.19	5363.03	4608.65	4935.46	5507.64	5986.98	4912.18	4028.37	5462.2	5031.58	4627.31	4557.88	4913.92	3595.97	4076.48	6090.06	5035.7	4627.85	4314.73
DNAJA4						484.919			390.382																	658.996	357.51							587.916				542.14						600.335
DNAJB1	598.763	488.934	542.247	605.177	627.349	2610.12	798.375	681.659	534.587	393.719	630.176	783.876		1055.84	546.657		444.843	554.148		780.092		552.088	646.979	642.931	865.092	3113.03	782.432	583.738	682.968		1044.96	331.998	537.904					713.377	328.79	552.354	739.34	687.854	455.102	601.386	1008.96	239.878	476.091		833.987
DNAJB11	3082.39	2701.79	2042.49	2543.27	2423.08	2125.28	1925.19	2472.69	2529.61	2452.62	2744.41	2981.37	2106.12	2624.7	2984.97	2721.79	2181.21	3025.92	2168.51	3488.61	3509.54	2423.96	2116.05	3265.06	2898.27	4141.62	3245.62	2540.6	2959.18	1664	2919.92	2565.21	2601.92	2870.84	2748.14	2953.15	2364.02	2748.71	2330.57	2471.02	2895.72	2354.97	2309.95	2069.41	2253.11	1589.87	1965.14	2054.05	2623.02
DNAJB6	4562.06	2168.11	3101.25	3707.22	2931.42	3578.13	2871.94	2962.11	3165.85	4676.06	4022.29	3869.74	2326.35	2871.67	3591.27	4578.72	2736.25	1558.14	2899.03	1903.03	2236.69	2060.12	3163.81	3448.36	4041.57	7068.38	4117.92	3713.4	3351	5581.37	2975.65	3906.07	2973.39	2912.57	2884.62	1710.13	3284.54	1989.89	2830.89	2635.49	3931.77	3673.18	3451.91	3557.84	4903.15	4972.58	3813.03	6966.91	4670.6
DNAJC10	1388.67	1152.66	1068.99	1311	1714.85	1040.3	1292.24	824.514	556.804	1447.88	973.096	1400.25	944.515	874.295	1150.14	1134.82	1032.35	789.11	1150.13	927.022	950.794	1254.4	1214.73	1075.38	662.013	1088.54	1386.38	1060.5	990.532	984.27	1264.83	829.724	1144.58	1026.67	1171.51	763.827	1156.89	1021.99	1061.43	1022.98	1060.05	1230.54	1142.54	1555.34	1113.42	1078.94	1287.26	1265.9	1230.28
DNAJC11	2155.31	2152.62	2049.64	1788.64	1667.21	1633.46	1512.29	2437.86	2048.21	1939.17	2174.8	1675.67	1600.68	1775.4	1858.83	1680.02	1765.9	1803.18	1558.28	2189.25	1859.28	1439.18	2007.48	1821.77	1412.62	2452.09	1620.24	1910.65	2004.01	1290.98	1569.67	1591.56	1427.49	1930.86	2266.35	2053.93	1549.02	1800.37	1769.59	1959.59	1553.69	1866.93	1572.81	1273.6	1563.83	1493.31	1639.37	2298.67	2363.05
DNAJC13	2035.44	1773.48	1760.58	1672.15	1688.54	1664.47	1529.45	1652.86	1677.55	1580.27	1785.73	1547.2	1904.19	1677.17	1604.23	1584.12	1771.92	1978.67	1718.73	1457.08	1519.41	1671.82	1758.68	1658.1	1653.47	1392.38	1785.77	1603.73	1924.4	1562.2	1885	2100.55	1779.57	2141.11	1773.14	1120.82	1757.6	1918.97	1963.4	2043.79	2056.64	1653.5	1918	1581.14	1512.52	1211.62	1777.12	1572.26	1806.81
DNAJC18	701.091	1018.28	837.015	971.464	1184.48	1267.71	784.146	1043.24	559.497	697.374			324.323	840.572	772.365	1265.25	1126.93			935.382		973.434	604.159	942.52	748.309	738.235		1126.15		1675.36	388.645	1438.27					866.54	732.751	1083.65	1399.04		584.468	612.69		302.301	719.096	707.777	814.736
DNAJC2	2976.12	2978.79	3272.17	2812.77	3157.59	2606.86	4064.27	1474.71	2654.65	3244.5	2663.86	2336.81	3048.25	2421.15	3167.45	2641.27	2774.28	2794.16	3102.24	2717.23	3289.96	3155.91	2970.65	2855.03	3016.89	3870.98	3275.82	3033.25	3401.5	1084.74	3848.82	2649.49	2830.47	2619.45	2374.93		2696.6	2968.04	2423.66	2798.23	2482.38	2873.96	2323.2	2610.29	3178.07	2656.34	2091.2	1600.16	3002.7
DNAJC30	578.097		230.396				668.223									277.197		566.953	87.4163													334.498		113.597					297.107
DNAJC7	942.502	484.243	773.223	279.303	822.769		680.222		567.92		382.766	751.724		717.15	513.482	802.245	482.095	909.109		516.911	936.702		771.585		1041.94	2007.7	712.596		595.32		942.579	486.096	707.598	600.983				455.775	791.971	778.607				914.288	562.687	659.278	426.709		515.067
DNAJC9	419.043		262.985		73.0754	338.709	363.235									242.943					529.908	156.377		300.742					383.634								517.408	211.157		251.101							257.698		382.512
DNLZ						413.259				626.06	835.488	1279	1517.7	609.407		1018.81		529.511	1190.75	749.948	488.145				1187.67		848.408	492.788		887.773	1099.63	1132.22		1399.77	1169.16		699.395				774.016	1184.12	745.99	1012.06	619.45	1312.9	980.447	1249.89
DNM1L	1944.85	1372.5	1863.4	1509.16	1763.66	1404.73	1887.4	1446.22	1795.23	1773.82	1707.14	1362.89	1671.76	1711.88	1697.31	1603.57	1714.15	1618.73	1886.2	1731.18	1350.14	1712.6	1541.51	1244.15	1875.86	1885.13	1928.06	2103.58	1361.49	1732.42	2327.89	1514.9	1859.09	1552.29	1494.5	1096.27	1465.65	1777.07	1557.59	1795.15	1642.22	1584.15	1314.38	2006.1	1393.21	1411	1759.18	1000.74	1803.34
DNM2	5268.39	6076.64	5185.11	4869.64	5092.13	5721.09	5160.19	5212.35	4545.47	4716.03	4863.97	5496.88	4914.74	6175.96	5712.33	4875.76	5714.85	5425.3	4926.05	5400.87	3909.39	5809.82	5387.88	5722.64	5773.8	7568.84	5551.65	5945.46	4434.03	4727.55	5542.94	5642.92	5943.28	5437.62	4603.53	3484.68	5624.92	6356.01	4699.06	5312.93	5962.59	5237.96	4761.86	5145.82	5723.25	4562.09	5328.89	3757.66	5408.1
DNMT1	3739.76	3173.31	3516.99	3662.81	3313.27	3577.66	2304.52	3744.82	3593.13	3597.66	3429.68	2735.37	2906.24	3455.3	3323.7	3682.82	3004.99	3821.51	3219.67	2925.68	3963.55	3318.93	3827.36	3209.68	3798	2122.14	3651.32	3283.15	3587.83	2969.07	3235.98	2954.13	3187.08	3435.02	3326.19	2562.98	3526.03	3208.2	3533.98	2569.47	3672.8	3451.82	3356.86	4239.91	3094.73	3486.48	3435.08	3536.5	3446.2
DNPEP	8372.12	10481.5	8262.8	9210.83	7941.07	11080.4	6549.09	11489.8	12387.7	13775	12504.3	14021.2	13014.9	15347.5	11667.8	13792.4	11796.8	13980.8	10220.8	13705.3	12052.9	13478.6	11370.8	16676.9	11033.3	10097.4	9820.54	12400.3	10435.6	12876.2	10379.3	14152.3	11160.5	13846.9	10856.2	12563.8	12161.8	13245.5	13033.1	10509.6	11591.4	12403.9	12751.4	11782.9	11696.7	10603.5	12624.3	10344.9	12326.4
DNPH1	1104.72	1003.62	749.247	1277.74	1339.17	988.964	1072.49	1085.33	766.72	1037.9	1267.15		976.943		1156.94	995.009	1413.13	944.303	947.958	715.85	944.622	916.942	830.363	1124.18	692.334		971.057	976.053	1163.01		1222.38	921.093	867.623	1027.02	1241.47		804.677	1146.68	1284.41	1281.93	1304.31	800.764	1133.69	1110.27	1280.32		959.742		1382.49
DOCK5	1079.05	1229.66							1628.37		1971.01																		1971.46		4241.84					897.566		1035.66	2053.81			2620.64						904.281
DOCK6	441.896	483.046	466.847	401.437	484.142	532.231				449.168	351.696		189.173	359.694	418.809	360.826	498.278	224.182		511.144	442.753	432.819	483.173	650.157	424.151	464.212	359.683	422.761	432.443		251.068	367.499	336.812				436.373	330.747	400.161	714.933	231.612	227.019	390.287	203.893	398.858		432.236		178.376
DOP1B	433.758	425.851	1240.39	492.255	1090.91		985.058	697.169	644.255				1497.27				703.275	358.471	710.415	768.532	479.413	786.295	1215.32	603.707	814.091			919.493			856.098	670.018	816.935	574.894				545.467	895.04	981.76		550.892	513.886	608.669	611.809	868.975			1006.19
DPCD	2995.73	2503.73	2373.2	2089.9	2345.52	2213.57	1953.01	2275.34	2007.1	2782.71	1789.68	2409.06	2188.59	2098.67	2145.34	2494.41	1913.54	2158.47	3256.64	2645.01	1876.12	2280.67	2000.28	2285.86	2464.88		2515.74	2557.92	2488.17	2182	1919.01	2233.68	2927.37	2202.8	3110.87	2207.39	2432.7	2329.21	2338.92	1715.88	2854.86	2299.87	2258.07	1939.79	3209.48	2687.81	1842.48	2633.95	1757.74
DPH1	1032.97	808.741	1139.15	1209.92	1245.61	1138.92	1740.32	812.114	892.393	1054.23	1279.01	1037.89	2057.8	1298.51	925.78	1443.53	1273.33	969.424	1158.73	1066.54	696.969	1150.02	1286.18	1203.48	1034.92	684.457	1318.36	1086.51	1307.45	1321.45	903.486	1397.87	935.354	1716.11	1046.66	1759.58	1612.79	1006.21	917.211	1372.98	1152.39	1158.92	1029.32	1300.04	1195.02	1626.37	1653.98	1784.84	936.648
DPH2	599.556	297.693	164.877	813.941	443.919	645.284	300.644		380.252	549.979	211.839		967.001	536.723	300.176	452.046	288.175	215.236	413.067	333.581	489.402	698.435	179.621	548.186		575.51	587.068	232.928	468.615		241.302	606.968	662.056	375.418	284.359		286.394	532.384	344.054	225.702	214.586		107.6	397.093	359.865		325.787		342.213
DPM1	3595.6	3262.42	3416.35	3427.84	3259.89	3365.45	3397.6	3934.86	3478.02	3399.65	3128.25	3184.55	2993.24	4047.85	3579.76	3636.83	2788.22	3084.08	3279.36	3433.97	2583.63	2970.78	2909.5	3607.86	3411.19	3521.44	3393.63	3055.24	3403	2373.25	3537.3	2943.09	3126.67	3888.4	3407.62	2104.37	2845.81	3176.47	3363.91	3380.45	3419.13	3529.6	4013.64	3293.96	3441.75	2901.43	3689.12	2442.37	3481.18
DPP3	8805.49	7487.47	7726.78	7310.82	8414.2	7680.04	8698.71	7580.49	7287.92	7919.75	7219.5	6742.98	6616.98	8121.05	7622.43	6740.99	7268.2	8452.58	7416.45	8260.85	6637.48	8099.55	7398.73	7500.2	8507.76	5862.01	7866.16	8682.5	7607.85	3176.68	8645.19	6523.61	7751.87	7406.48	6693.87	2878.25	7113.28	8456.43	7391.86	7843.32	7324.43	7478.35	6911.74	8298.18	8336.42	3500.38	7841.87	2440.62	8727.18
DPP7		501.3		832.071		368.324	486.939	1507.55	781.542	638.829	820.311	837.663	636.27	718.169	702.456	1071.87		674.473	759.504	824.112				772.155		1362.2					904.451			507.871	712.54	2771.88	990.058	556.476		544.88	823.199		806.273	653.773				542.619	752.587
DPP9	2023.62	3038.77	2045.9	2386.39	2403.3	3013.69	2187.8	2142.72	2621.12	2996.78	2837.58	2464.42	2529.01	2275.01	3404.38	3002.86	2194.81	2784.21	2585.7	2639.6	2574.57	2594.99	2720.4	2800.99	3290.95	3087.66	3056.42	2740.79	2606.86	2724.08	2244.33	2780.19	2362.4	2421.7	2993.25	2805.76	2624.23	2875.13	2637.94	2125.65	3319.54	3429.8	2833.53	2945.15	2938.87	2946.53	3321.64	3002.54	3281.47
DPYSL2			1249.09		1164.28	1857.58	1118.1	1139.54	727.259	1819.98	1122.25	1276.89	1006.76	837.233	1118.71	1263.69	1204.53	1289.93		1036.96	1399.09	789.873	1443.07	1322.34		2037.28	1046.77	1349.11	1040.04	964.702	1328.52	955.881	1102.71	1261.4		1246.5	1388.89	1325.23	1378.6	1349.25	1356.23	1148.82	1050.35	869.496	1376.78	886.662	1211.86	657.502	2041.22
DRG1	6389.85	6409.6	6781.16	6443.5	5779.17	6260.32	6281.07	7801.18	6393.68	6097.65	5176.42	5956.15	5975.08	5379.45	5410.69	4639.45	6083.31	6216.07	5621.58	5452.64	5747.73	5321.35	5820.95	6103.73	5276.2	5276.02	5497.7	5731.77	6004.66	3202.78	6137.27	5707.57	6652.46	4561.58	5153.98	3337.6	6660.09	5868.12	5738.6	6314.89	5875.93	5892.57	6332.52	5526.27	5786.79	3546.83	6144.22	3669.23	5590.47
DRG2	5172.72	5008.1	5254.61	5867.49	5376.65	5145.52	5095.94	4407.76	5464.37	4631.18	5739.34	5356.26	4776.96	5547.9	5309.91	6126.88	5078.97	4857.65	5003.44	4981.53	4323.59	4759.37	4535.63	5205.07	7173.86	4324.34	5882.04	4827.38	4537.99	7011.14	3472.71	5445.35	5091.14	5387.56	4999.51	4314.38	5788.36	4786.95	5058.02	5862.61	4770.9	5571.04	5041.31	5171.93	5831.33	5078.17	5819.83	6312.21	5070.9
DSC1	1858.56	918.112		1662.03	719.306	2126.95	1338.3				1252.48	503.031			1102.12			820.49		1761.79	3386.21		2645.87			28068.5								1790.79	2927.24	3004.55			2158.78	645.72	674.351	678.404			12986	1837.22	1570.63		385.467
DSC3	535.528	448.832		424.564																			891.765			10968.7										1816.52									1870.12
DSG1	1882.56	1320.08		412.736	343.573	927.764	436.202			323.949			668.225	781.173	606.137		823.771			1596.02	892.47	812.061	1750.26			17975.1			512.686		672.492	707.671			932.276	2279.28			1140.89	662.053			361.53		4929.41	1087.42	956.083
DSG2	1019.84	805.604	967.789	1132.16	685.163	817.023	1181.27	1227.63	1025.42	1245.12	1280.18	1245.43	1421.18	1055.71	1182.39		995.298	1123.76	997.171	950.633	826.816	1323.12	836.19	1074.03	1047.24	312.528	1260.3	1244.54	1454.93	1586.55	1014.07	1413.46	822.905	1348.81	1088.56		1188.61	1238.71	1238.13	1422.91	877.869	1589.28	2018.44	770.371	1348.25		1444.7		1310.56
DSG3																										9361.66										2799.82
DSP	6201.91	5884.97	6276.47	6754.18	6167.66	6135.94	6889.54	5042.62	5912.59	6507.25	5568.06	5160.64	6080.64	5693.15	6062.15	5570.82	6267.33	5943.5	5626.91	7007.6	6999.62	5956.76	5606.82	5626.23	5647.28	151484	5815.84	6004.54	6451.34	4641.15	5782.28	5685.09	5505.78	6675.32	6300.93	39685.6	6109.31	6331.6	6594.34	5922.35	5831.89	5356.46	5474.04	5937.76	7978.91	4023.27	5910.46	4471.11	6345.79
DST	2125.63	1362.85	1748.86		1244.43	2654.95	1518.34	4546.07	2774.4		1489.15	1746.08		1012.59	2238.78	3052.73	842.425	2045.82	2004.55			2095.07	1719.13	2602.74	3278.05	1567.98	1493.06	1689.88						2391.21		5215.24		1664.78		1536.61			2404.74	1257.5	873.772		2068.75
DSTN	23784.1	22476.6	21156.8	24414	21932.2	23178	23989.3	13201.5	20205.9	20750.8	20682.1	20649	23504.5	21327.2	23731.7	20909.6	21595.9	20423.9	16789.4	23109.1	19808.9	20175.8	22442.1	24996.1	21525.2	26375.2	17995.6	23574.3	21007.3	13764.6	23398.7	21607.9	23618.5	22420	21004.9	17542.9	21137.5	19373.1	21296.5	23564.3	25347.1	21938.5	21657.9	20282.5	21671	19793.4	21386.4	14662.1	21225.7
DTD1	1789.09	2050.93	1926.84	1972.24	1797.73	2775.41	1631.87	2326.93	2243.13	2660	2455.18	2491.18	2779.07	3159.38	2576.74	2421.21	2550.39	3320.89	1627.83	2846.76	1729.32	2421.44	1838	2377.67	2209.79	2121.66	1547.71	2474.66	2132.45	2201.3	2115.57	3801.21	2263.31	2956.27	2444.5	4421.87	2181.2	2892.09	2079.32	3390.99	2584.05	2708.27	2606.26	2218.9	2670.39	2132.76	2887.99	1454.55	2608.08
DTWD1	1412.69	1981.03	2031.31	1660.77	1738.13	2587.98	1211.27	2939.58	1823.95	2371.79	2082.1	2151.51	1764.59	2624.14	2546.6	1616.93	1695.45	1812.14	1542.69	1693.42	1637.33	2012.24	1316.03	2320.45	2577.23		899.303	1468.53	2129.58	1905.56	2004.04	1738.41	1568.32	2337.81		1252.53	1705.74	2342.45	1715.46	1873.66	1625.28	1895.96	1724.13	1263.21	1882.17	2238.96	1020.26	1560.3	1759.75
DTWD2	2274.07	1829.36				1599.74	2260.38		1464.81	1900.4	2615.5	2372.07		1967.14	1928.49	2127.02		1974.08		2345.64				2331.71	1506.89		2344.33	2251.06	2204.18	2462.7	2032.3	2472.53		2335.26			1552.46	1744.08	2221.7	1549.69	2033.45	2767.39	2268.68	1602.08			2291.52
DTYMK	2036.71	2094.69	1955.87	1461.14	2555.28	1902.35	2261.81	1763.17	2273.19	1725.25	1908.89	1404.29	2159.91	2202.49	1688.48	1830.16	1995.91	1883.48	2291.53	1631.86	2272.76	2285.68	1816.12	2232.57	2096.74	1056.52	1643.77	1732.43	1845.15		3027.85	1091.16	2243.25	1744.7	1528.82		1734.02	2015.69	1579.42	2102.05	1514.94	1727.62	2237.61	2214.37	2214.7	982.305	2022.48		1596.59
DUS2	1476.21	1205.32	1321.5	1491.05	1048.6	1271.19	1154.53	1291.3	1402.65	1211.65	1293.31	1642.42	1857.85	1260.18	1451.41	1182.76	1412.88	1433.2	1414.58	1441.7	1384.16	1173.28	1141.09	1397.08	1264	827.599	1152.34	1383.65	1391.64	810.929	1199.86	1244.29	1444.54	1440.51	1243.43	1433.65	1311.51	1482.48	1115.45	1446.26	1492.8	1388.62	1357.83	1389.49	975.296	1414.68	1597.39	892.013	1153.75
DUSP23	2014.57	3809.49	3963.01	4962.81	4599.25	4024.54	2794.48	3852.7	3824.42	4016.06	2749.5	3200.87	4084.44	4351.1	2354.37	1691.83	4725.21	3097.47	3150.15	4164.4	4396.22	5456.91	4440.06	4826.44	3819.56	4542.34	3988.16	3603.96	3761.46		3850.36	4620.89	3553.84	4264.37	5007.3	4174.7	4218.48	3250.8	3656.59	3752.21	3436.8	2520.27	3267.46	4106.9	3306.61	2480.36	4141.89		3741.12
DUSP3	954.278		904.713		857.146	400.401	623.702		713.56	722.966		798.271	806.11	847.223	546.924	440.221	934.921		311.094	371.1		496.133	768.92	506.434		1449.12		876.578			679.561		575.427	619.277	1170.47					561.882	489.756	461.44		692.769	855.561		800.46		520.108
DUT	7042.84	5428.75	6327.81	3718.59	6659.58	5397.15	6282.42	2570.87	5583.04	6159.62	5796.42	5457.83	5305.26	7045.22	6584.07	5407.12	5935.91	8096.52	6130.16	6328.32	6744.91	6282.54	5393.8	6679.92	6698.26	3391.97	6892.65	7049.88	6395.6	1707.37	8711.06	4426.4	6526.27	6520.03	3988.21	2071.3	6269.78	6467.68	5587.48	6705.96	5533.3	5337.91	5178.99	8151.77	7081	2242.87	7763.62	2868.49	6607.82
DYM	2321.46	1695.57	1970.35	2033.02	2171.71	1499.1	1718.8	1504.26	1818.15	1399.84	1849.74	1776.19	1378.59	1209.06	2273.78	2529.75	1591.63	1223.87	1381.19	1497.89	1004.91	1622.55	1850.38	1986.65	1831.56	1256.54	2458.68	1542.85	1851.49	1830.34	1783.85	2516.34	1939.4	1797.46	1430.44	1185.07	1639.42	1795.48	1523.41	1411.44	1656.84	2406.04	1461.36	1972.73	2033.03	2333.02	1931.08	1507.15	1782.29
DYNC1H1	15223.4	16566.4	16113.3	16347.5	15071.1	16494.1	15185	12622.3	14276.7	16003.2	13733.4	13585.9	14864.1	15344	15382.6	13662.8	15488.9	14554.3	15361.3	15821.9	13112.3	15828.6	14593.6	15148.9	14672.4	16022.5	14510.1	15540.5	14817.3	7741.1	14283.4	13905	15227.2	16040.2	14809.9	8744.72	15835.1	16553.4	14739.5	15070.8	16105.2	14441.5	15908.7	14325	14959.6	9342.6	14194.2	7689.2	14883.3
DYNC1I2	2804	2880.24	2221.11	2079.02	2655.6	2824.08	2421.3	3557.73	2673.84	2897.47	3279.3	2971.46	3368.54	2450.66	3042.28	2590.62	3362.4	2968.27	3264.65	2760.39	2784.35	2900.44	2751.14	3372.6	2602.89	3041.33	2724.92	2856.1	3254.73	2737.74	2307.37	3112.92	3254.97	2736.2	3119.64	2890.37	2473.29	2998.92	2778.63	3351.39	3518.42	2706.14	2428.92	2608.11	3109.76	2695.53	2561.52	3232.8	2460.01
DYNC1LI1	3621.45	3984.05	2968.73	4013.07	3715.48	4241.52	4296.65	4079.58	4578.08	4973.22	3137.22	3513.64	3535.47	4415.88	3778.78	4591.5	3532.05	3978.77	3840.98	3947.15	4904.52	3808.33	3196.84	3773.32	3703.73	3509.84	3777.78	4564.76	3161.07		4671.68	3248.83	3387.05	3539.27	3505.81	2733.61	4216.91	4478.89	3800.24	4637.84	3628.44	3987.84	3649.96	4382.96	4378.57	2897.93	4375.26		4195.64
DYNC1LI2	2830.73	2620.11	2539.84	2508.39	2680.75	2768.81	3437.01	3188.17	3164.08	2167.31	2045.51	2695.65	2643.08	2858.43	2747.26	2658.12	2691.47	2897.87	2776.34	2410.03	3456.51	3141.21	2898.22	2948.7	3074.11	3487.9	2992.04	2985.17	2531.65	2241.54	2947.27	3402.88	2993.07	2783.51	2978.37	2180.87	3198.47	2626.09	2944	2809.95	2971.4	2453.49	2636.64	3097.18	2758.43	2616.02	2902.65	2608.21	2801.45
DYNLL1			938.458	248.715	315.857	285.061	307.082		676.307	470.086	367.302	554.576	511.472	397.338	400.484	837.252	712.721	462.049	355.149	439.698	379.539	485.852		493.837	496.673	2140.72	326.148	273.98	324.212	17.603	242.673	429.757	359.423	589.057	461.957	598.226	257.98	389.303	625.17	225.191	358.706	451.405	131.584	326.801	272.662		392.55	463.15	398.266
DYNLRB1	837.179	662.624	353.88	543.5	925.311	588.652	441.615	1140.05	735.242	559.067	665.46	844.343	1055.96	634.19	574.331	755.14	1053.71	939.481		798.916	1071.51	806.801	531.085	901.175	992.675	1024.82	367.034	580.235	1085.66	648.045	627.542	753.343	265.719		681.837	773.889	1451.27	710.222	452.226	878.116	949.518	917.399	545.554	777.034	956.186	833.185	719.613	2057.7	861.125
DYNLT1	1957.09	1663.58	1759.52	2158.22	2006.54	2538.19	2635.73	3098.48	2579.8	1751.11	2170.17	2147.85	1460.39	1819.16	2064.26	3548.89	1979.44	1470.78	2164.04	1506.45	719.592	2110.33	1589.48	2502.51	1837.16	2242.64	2703.07	2399.34	2232.83	1331.12	1946.93	2622.53	3642.63	2024.56	3111.63	2008.22	1944.68	2033.44	2633.78	2102.87	1806.48	2090.95	2410.08	2429.72	3038.61	2558.16	2375.49	2191.94	2082.48
DYNLT3	380.121	870.005	926.943	734.783	297.263	490.841	650.251	582.85	838.116	715.737	733.282	794.454	491.401	395.594	529.559	542.958	513.741	521.655	816.284	470.319	847.604	643.391	671.481	631.302	728.42	675.791	405.141	392.132	746.672	994.722	430.076	593.935	714.429	427.857	337.305		653.658	572	955.205	836.877	810.778	831.735	825.584	499.49	425.369	1311.16	669.874	825.391	729.234
EARS2	2339.45	1801.01	2352.73	2051.02	2328.22	2376.89	2687.92	1742.92	2586.08	2676.15	2420.8	2610.52	2598.44	3260.06	1733.34	2707.93	2250.78	1704.36	2708.1	2396.29	1537.8	2434.08	1524.08	1684.32	1815.94	2016.82	2075.28	2124.61	3630	1582.42	2605.87	2572.82	1612.99		2583.5		1764.14	2181.83	1180.89	1590.4	1371.27	1553.42	1704.8	2294.76	1854.8		2198.65
ECH1	7946.02	10576.3	5492.72	8143.75	7420.1	9692.18	6870.45	9738.51	8785.48	9816.72	9466.33	8645.76	8877.69	9175.87	8937.34	9181.12	8237.17	8633.91	8940.74	9641.54	6908.12	10465.6	8495.49	8058.88	8771.42	8585.77	8285.93	8772.3	8322.47	6049.5	7516.87	9767.29	7591.77	8449.42	8687.14	9660.93	8662.55	9015.69	7874.6	9379.75	8966.9	8384.95	9466.91	9401.69	8567.53	7262.04	8131.47	8447.06	9020.45
ECHS1	6116.17	6776.15	5269.7	6249.18	5022.41	6684.43	4977.26	8479.41	5698.41	6520.49	5421.17	5131.79	5183.99	5702.47	5632.58	4683.46	5623.77	7355.51	6128.45	6008.14	5106.44	5450.94	5662.76	5360.67	5790.53	3989.44	5270.12	6634.66	5463.26	2291.71	6557.69	5722.11	5920.24	6011.45	4533.29	3808.5	5732.23	6039.88	5197.02	6166.17	6437.06	5845.76	6283.18	7210.24	6250.47	2643.52	6779.09	2509.09	7790.37
ECI1	5036.1	4978.29	3943.48	5062.73	4559.45	6049.01	5261.12	6254.84	5426.16	5490.19	4660.84	4856.35	4677.16	5464.16	4542.98	5183.55	4453.14	5370.9	5396.27	4586.68	3727.9	5218.93	4192.06	4203.8	4895.71	4334.75	5126.94	4865.35	4349.04	4233.38	5418.69	4761.27	4834.31	4682.14	4394.68	4514.61	4341.05	4579.8	3764.32	4220.31	5503.42	4997.21	5237.28	5084.44	5562.56	4122.32	5605.71	2616.09	4963.23
ECM1	441.756			361.903																						3698.29						182.613				3686.26									1286.28
ECPAS	3951.31	3377.01	3830.64	3654.46	3612.27	3365.38	3621.58	3065.72	3375.17	3470.67	3013.34	3322.41	3935.34	3827.58	3509.1	3172.32	3318.33	3711.47	3789.68	3479.93	2820.02	3290.18	3649.87	3210.36	3441.7	2898.8	3500.43	3936.9	3505.22	1401.96	3557.97	3023.77	3370.18	3566.61	3529.08	1514.04	3734.61	3839.39	3538.81	3198.9	3786.97	3448.51	3744.66	3734.84	3376.81	1978.35	3704.31	1759.84	3804.41
EDC3		676.516				565.06	947.573	859.976	554.291		791.904	928.846		945.688	617.688	795.206		670.71	424.838			612.551		617.375	663.311		848.266		755.73					561.036			721.529	1039.59	1025.13	317.049					721.732
EDC4	1377.97	1843.49	1652.15	1641.57	1660.76	1601.57	1727.64	1738.97	1604.69	2045.97	1593.37	1913.51	1481.62	1441.93	1430.28	1363.78	1829.07	1822.34	1477.37	1518.56	1633.94	1712.87	1573.44	1754.1	1396.38	1588.67	1509.61	1660.58	1637.61	1176.58	1855.68	2036.42	1630.63	1597.95	1551.24	1879.21	1541.68	1951.63	1402.52	1994.21	1267.66	1439.28	1519.29	1268.58	1562.06	1646.61	1683.21	1870.21	1206.9
EEA1		264.075						470.368	371.18	259.41					302.942											2500.4							331.413			1390.43									453.601
EED	1314.44	1282.85	1430.03	1539.02	1471.64	1255.91	1320.98	1358.03	1185.16	890.266	1592.8	1546.15	1704.2	1582.41	1328.71	1513.52	1827.48	1383.64	1180.14	1397.72	1156.87	1229.86	1719.4	1458.84	1366.08	1090.99	1102.83	1395.32	1529.11	1686.17	1507.88	1681.91	1862.83	1137.33	1916.04	1464.82	1637.61	1425.45	1017.77	1327.34	1847.54	1165.65	1522	1512.31	1366.53	1611.12	1366.48	1099.01	1292.73
EEF1A2	1846.43	1347.64	1706.32	1469.12	1890.37	1329.06	1354.31	889.925	1310.12	1424.91	1482.82	910.398	1806.16	1263.29	1376.5	1272.07	1232.27	1470.55	3416.41	707.296	16347.9	1195.96	1013	1115.78	1500.59	1031.72	1405.66	929.725	1253.79	1255.74	1207.83	872.132	1197.38	1497.35	1164.78	750.587	1037	1096.7	1049.9	1422.73	1033.51	883.186	1632.55	945.764	1099.2	1322.76	1030.39	714.43	1600.74
EEF1AKMT1	1470.84	1041.17	889.985	1098.28	1135.88	1315.77	910.459	1490.03	962.361		1213.38		1667.88	766.334	789.52	1846.01		1138.3	1504.33	1115.52	824.684	753.901		962.22	1573.99		1149.59	681.432			1226.2	1525.5			1332.3			1205.61	1051.91	1416.65	1266.79	983.149	1216.77	1502.11	1125.02		1202.1
EEF1B2	3347.82	7909.64	2783.95	4824.58	2832.37	5782.51	3182.49	4831.63	3244.41	3174.18	3226.16	4399.96	3908.55	4584.92	4466.33	3343.67	5335.5	6491.33	4768.19	5025.29	7096.22	5669.72	5613.89	6149.2	4291.18	7049.5	3972.22	4533.97	4938.07	3362.76	4597.94	4070.74	4653.77	5005.1	4609.45	3196.65	6483.69	7847.24	4917.49	6184.08	4276.1	4220.93	4344.14	5006.69	3991.25	3273.69	4028.11	2351.46	6576.63
EEF1D	2567	1728.78	2732.06	2071.02	2750.13	1847.89	2857.32	1533.16	1944.01	2559.79	2140.02	2417.99	2303.42	2776.37	2004.28	2163.35	2264.52	2904.07	1820.2	2017.33	1949.03	1930.63	1830.4	2056.58	2630.23	6998.78	2026.79	3040.33	2087.34	1447.62	3785.02	2536.67	2529.39	2151.71	1936.23	1495.89	2076.15	2176.22	2093.43	2737.22	1993.4	2257.89	2046.87	2412.89	2453.62	1434.21	2288.19	1049.04	2630.25
EEF1E1	4358.51	2737.01	3582.37	3945.06	4372.12	3469.01	3036.31	2724.88	3935.49	3213.58	3792.27	3094.13	3365.97	3208.47	4606.33	3853.56	3763.88	4903.88	3962.9	3822.52	2513.25	4009.96	3421.91	2298.28	4074.29	2936.58	3418.04	3189.05	3581.28	1107.58	3916.45	2602.64	3604.21	2623.57	4173.96	824.866	3018.05	3860.93	4211.2	4154.93	4318.64	4393.57	3331.32	3905.44	3982.23	1887.08	4162.16	1912.95	4989.82
EEF1G	85000.6	88322	87766.8	83959.9	88700.1	86091.4	83205.2	87518.7	80948.8	84452	82715	79653	78011.1	79688.2	82003	83006.3	82569.2	80578.4	78106	81313.4	64421.2	78110.4	81811	80659.7	83668.4	87245.3	83350.3	84040.6	79266.1	56108	85193.4	78379.4	80836.6	84695	74552.2	55003.5	78179.8	83442.2	75871.7	84980.9	90859.7	75860.1	79887.4	80745	79664.6	66262.3	76903.5	56228.1	78105
EEF2	117018	113652	121323	122259	120151	121312	124584	117458	117117	114385	116596	117135	117973	114923	115794	111142	118545	117573	111509	111947	110530	113115	115026	116928	118384	128302	118037	115485	116681	101475	112087	111080	116371	115887	120129	95300.4	115621	112297	120204	112503	121920	120587	116830	116144	116293	104035	117954	94448.4	118593
EEFSEC	1657.67	1794.31	2080.76	1914.18	2970.21	2249.02	1694.03	2040.1	1788.83	2334.05	2194.2	1793.93	2131.63	1894.58	2042.2	2311.59	2212.62	2020.62	1398.28	2188.98	1852.37	2130.2	2077.34	2015.82	1960.66	2524.46	1904.11	1968.18	1640.75	2424.64	1638.37	2052.01	2280.45	2349.61	2208.13	2527.84	2743.43	2252.34	2115.5	1778	2109.25	2036.26	2231.2	1764.25	1823.38	2497.81	1911.78	2194.9	1699.46
EFCAB5	5656.64	6350.78	4881.99	7507.38	5201.07	8845.09	8283.09			6897.05		10954.2	12622.6			8936.55	8076.5	7674.52		8405.65	7130.32	6974.5		9006.65	11109.2		10248.6	10441.8	10532.5	8760.55	9352.58	8618.93		9816.05	8785.58	8048.97	9213.37	8291.38	6192.33	5996.13				11306.8	9900.89		7964.99	10736.8	9255.68
EFEMP1	302.301	206.107	304.906	131.493			314.912	220.892	391.368	305.847					268.238	252.575		53.7941		358.148				547.219		485.951		313.726			231.545	175.484		191.992	159.07	201.06				750.357		194.036		201.128			413.516	330.216	358.136
EFL1	1219.58	1966.82	1814.04	1710.44	1297.6	1547.74	1267.1	1363.71	1723.97	1669.51	1687.55	1135.24	1574.81	1744.44	1417.17	1431.81	1744.48	1304.55	2288.23	1578.71	1498.96	1351.62	1337.53	1620.1	1300.63	1433.77	1292.64	1252.37	1169.62		1317.53	1264.34	1409.56	1368.59	1694.87		1603.41	1719.45	1408.33	1591.16	1611.95	1317.95	1625.8	1461.53	1421.35		1762.55	2108.37	1218.01
EFS	887.045		608.907		794.285		507.087	1462.24	844.772		648.165	138.757		362.581					665.868	355.102				342.816	725.408	1218.96	429.066	663.604		1374.2		724.429	837.808	955.923		1242.01		499.651	479.432				1122.61	755.16	656.46	1116.76	540.957		1147.99
EFTUD2	6082.59	6164	6078.51	6046.43	6270.29	6093.21	6278.35	6023.08	6282.49	6213.21	6081.63	5278.56	6104.21	5624.98	6091.28	5691.23	6207.81	5916.96	5727.7	5731.72	6848.19	5758.96	6820.15	6230.7	6177.99	6424.71	5357.06	6435.09	6123.43	4414.16	5920.15	6105.93	6016.9	6080.93	6085.85	5452.61	5541.41	5925.57	6615.06	6353.74	6189.31	6433.83	5467.79	5565.37	6130.31	5633.57	5882.4	5566.42	6683.34
EHBP1L1		1151.51		1194.65						1799.15									798.778	1375.75						1008.69										894.7				1410.97	659.347		1152.07	976.198		1287.12
EHD1	1302.68	893.983	1102.74	1048.43	1367.1	1557.38	1845.18	1793.77	1224.6	1146.58	1365.65	1489.59	1992.87	1280.7	1674.57	1705.36	1163.85	1753.87	1333.63	1297.01	1447.5	1629.63	2082.28	1531.73	1117.64	3800.95	1500.24	1098	1493.8	1043.98	1425.89	1325.44	1080.8	1729.11	1605.83	2829.57	2492.39	1234.7	1781.46	1932.01	2535.94	1367.89	1495.33	1400.28	1192.79		1140.5		1313.51
EHD4	1565.94	1607.24	1736.14	1440.99	1403.97	1781.29	1813.2	1414.01	887.971	1301.12	1275.05	1360.1	2147.03	1177.67	1405.37	1689.67	1206.53	1802.42	1675.65	1326.56	1767.48	1176.75	2095.43	1684.64	1516.04	2397.76	1272.05	1473.35	1527.51	1136.5	1750.99	1049.4	1337.09	1083.59	1438.08	775.118	1525.34	1482.1	1272.06	1398.54	1326.04	1277.01	1295.54	1613.11	1115.62	884.599	1462.28	536.68	1396.07
EIF2A	5872.72	5741.93	5018.04	5436.55	5863.31	7045.25	4473.56	6622.26	7098.45	6858.06	6343.87	6309.69	5525.82	5953.92	6350.47	6903.92	7036.44	6597.64	6151.08	6640.57	6697.5	5942.95	7278.2	7006.75	6672.67	7675.41	6882.5	6755.76	5451.44	5564.2	5757.37	6912.93	5519.77	7104.52	5660.96	5705.5	6129.34	5923.42	5784.32	6301.64	7157.07	7044.23	6328.57	6663.84	5512.83	7205.13	6471.51	4612.77	7250.31
EIF2AK2	3688.55	4120.4	3625.34	4311.57	3655.06	4162.67	3965.78	3787.73	4139.94	3638.85	4059.47	3762.86	3787.07	4040.03	3125.03	3912.7	3324.06	3839.14	3684.79	3733.52	3600.42	3686.76	3945.11	4113.66	3399.63	3025.5	4088.74	3825.91	3112.25	3367.86	3593.9	3388.76	3793.74	3743.81	4293.29	2979.66	3835.62	4251.99	3901.9	3719.97	3879.87	3990.89	3759.6	4148.56	4030.17	4685.2	3931.36	4516.73	3827.2
EIF2B1	3346.89	3066.61	3375.6	2410.04	2902.68	3273.66	2653.06	3004.89	2804.52	3135.37	2606.25	2181.8	2134.68	3026.02	2541.02	1617.86	2252.96	2678.48	2412.61	2458.27	1707.35	2429.08	2643.84	2430.63	3216.77	2626.32	2498.53	2723.38	2587.11		2913.02	2187.49	2592.27	2329.73	1741.2		1992.54	2716.94	2342.38	2574.62	3515.18	2571.57	2787.74	3339.34	2717.93	825.459	2249.24		2751.43
EIF2B3	4924.13	4339.3	4372.92	4869.09	4084.37	4292.73	4325.33	5389.66	3725.72	4073.59	4317.73	4148.54	6159.68	4147.84	3296.39	5006.42	3448.55	4543.24	3204.65	3725.01	3589.82	4213.5	4012.73	3665.85	4807.51	5448.96	3741.29	4518.55	4208.46	3195.91	3983.55	4340.62	4170.59	3654.66	4469.42	3012.74	4537.86	3993.02	3801.35	4181.47	4225.27	3991.88	4721.54	4089.27	3478.48	3737.18	4041.31	2216.36	3173.08
EIF2B4	1344.94	1413.98	1792.59	1348.74	1585.82	1545.46	1631.32	1294.74	1228.63	943.67	1209.72	1097.86	1487.49	1377.34	1156.47	1289.69	1210.12	1723.4	1306.28	1350.29	1080.33	1213.77	1284.03	794.182	1314.89	1245.21	1486.13	1368.93	1627.28	486.596	1471.65	1318.87	1367.6	1011.78	1439.06	1560.2	1414.03	1506.62	1004.18	1778.08	1158.17	1027.52	1484.45	1661.1	1604.29	1615.02	1565.11	424.978	1163.66
EIF2B5	3452.19	3510.35	4298.41	4354.38	4317.58	4377.84	4570.51	4247.05	4161.31	3469.25	3899.67	5503.11	4594.64	4065.24	4159.91	4307.69	4212.36	4099.68	5223.49	4409.9	4222.18	4601.76	4852.35	4259.96	4311.51	3522.41	4304.16	4484.75	4415.07	3923.25	4257.64	4637.05	4322.98	4590.98	4861.02	3280.24	4690.11	4194.75	4305.57	3520.83	3806.98	4495.43	5040.1	4805.94	4461.78	3436.11	4515.44	4179.28	4768.65
EIF2D	2341.25	2223.2	2576.62	1721.09	1565.9	1665.44	2013.3	1762.52	2867.06	2347.76	1520.32	2036.75	1202.2	1910.38	1792.69	1681.58	1892.8	2126.27	2155.39	2414.35	1894.07	1643.27	2478.29	1948.69	2000.74	1229.35	2034.4	2174.32	2003.92		1928.67	1642.47	2336.84	2064.05	1778.27		1539.55	1855.18	2043.08	1919.32	1836.21	1861.23	1680.29	2535.32	2136.04		2435.09	665.791	2276.36
EIF2S1	17357.7	17239.8	16384.3	17513.2	16082.1	16328.7	14480.1	17416.2	14734.6	16319.4	16947.7	17057	16101.1	17472.4	17028.4	19211.2	17340	16998.9	16223.1	17700.3	13795.1	16523.1	18288.1	18571	17322.6	18528.9	15731.5	16984.6	15753.7	16390.8	14692.2	16315.2	17004.1	15966.3	18524.3	15320.4	18050.4	17702.1	17402.1	19076.4	18305.8	18372.4	16135.9	16872.8	16492	16321.3	15401.5	17226.6	16161.6
EIF2S2	10379.7	11919.6	12674.1	12297.7	9401.29	10169.9	11272.7	8270.49	10525.1	9723.41	9154.17	7897.57	11340.8	9438.74	9343.71	9077	8463.87	9506.35	8792.32	9445.65	8476.49	9012.58	10474.5	8784.22	8829.23	8773.64	9626.82	10558.6	10791.4	5494.63	10429.6	10948.2	10501.1	9421.97	10767.6	6301.07	11045.9	11991.9	9281.55	10871.5	9275.27	8255.46	9550.98	10701.1	9822.06	6328.68	9785.08	5537.65	10223
EIF2S3	6923.4	9176.66	8108.5	7101.25	8712.13	7201.47	7526.74	7725.35	7381.42	8085.06	8623.78	6853.31	6424.55	8202.92	7553.92	7691.67	8665.49	7523.43	7558.16	7406.27	6814.6	7519.37	8157.17	6631.35	8538.31	6508.93	7492.06	8141.93	8267.65	7071.03	6404.4	9447.57	7764.72	6829.03	7172.14	7160.21	7286.51	7205.3	8308.1	6931.82	6275.3	6949.53	7843.52	6614.53	6931.76	6635.19	7422.37	6827.35	6892.77
EIF3A	8705.92	7256.35	7604.83	5828.44	7419.62	6790.72	6485.52	7718.35	7396.84	6885.19	6953.59	6036.86	7881.32	7099.56	7251.84	5829.6	7634.87	8619.32	6874.88	7021.24	8289.87	6013.31	8054.8	6812.74	7501.1	10178.5	7383.26	7867.92	8005.81	1359.86	8692.56	5359.77	8020.27	7325.43	6780.47	2599.78	7261.7	8508.62	7753.28	6429.99	6367.75	6243.23	6695.1	8405.71	7730.81	3380.13	8592.8	3456.12	8456.41
EIF3B	24901.5	27828.4	24885.6	26439	24085.8	25129.7	23280.9	27123.5	24165	27676.9	25843.6	25117.6	26012.5	25832	26619.7	27552.1	27284.1	26553.4	25466.3	26453.9	19269.8	25711.5	23400.8	25543.5	27178.1	22730.8	28705.9	25543.6	27185.1	18221.4	26990	26069.8	28442.4	28485.5	26816.2	21156.1	25573.1	27533.5	23891.6	26934	31277.9	27460.6	27403.1	27045.5	26731.6	21646.6	26291.8	19246.9	27504.4
EIF3D	8726.57	8787.14	8251.71	7472.1	8065.15	7935.59	7387.57	7676.4	8422.41	7998.81	7868.7	6870.6	7423.13	7699.07	7264.18	8102.5	8113.45	7519.58	6983.01	7598.98	7009.45	7373.67	7808.16	7926.26	7612.91	7124.39	6581.28	7611.4	6694.68	7296.59	7132.52	7804.51	7145.59	7817.25	7507.12	7179.32	7106.62	7921.63	7486.23	9363.06	7793.82	7888.31	7681.89	7008.18	8536.25	7602.15	6616.11	7059.21	7162.07
EIF3E	2884.81	2568.05	2129.21	2410.56	2755.8	2292.77	2538.14	1865.88	2884.65	2410.13	2916.84	3253.5	2562.8	2648.49	3633.25	2886.74	3448.82	3374.07	2558.25	3062.53	1842.31	3457.26	3239.98	3193.27	2903.13	3201.79	3174.88	2313.76	2902.84	1452.1	3219.16	1868.45	4092.32	1830.31	2673.08		2746.23	2453.58	3836.05	1909.28	2682.99	1922.24	2147.9	3112.53	2310.99	1214.91	3478.9	1715.84	2613.47
EIF3F	8587.34	7641.32	7915.68	7517.98	7486.99	7547.88	7124.91	9284.54	6550.34	6906.76	5934.46	6282.51	6821.15	7169.44	7492.07	5944.04	6896.49	7551.49	7480.38	7031.76	6149.4	7418.31	7769.92	7607.88	6385.47	8040.95	6838.93	7334.68	7236.62	2586.94	8284.33	6091.57	7624.42	6812.17	6301.63	3090.68	7541.34	8407.53	6800.46	7741.3	6487.51	6098.52	6736.07	7117.81	7218.45	3921.43	7786.2	2834.18	7004.25
EIF3G	6117.58	7087.39	5984.61	6442.51	5992.28	6114.57	4014.53	7401.77	6107.94	6231.63	6954.92	7262.03	6731.64	6890.51	7164.52	7922.04	7748.85	6831.83	6791.72	8225.43	5287.97	7929.39	7805.16	8378.69	6334.03	8659.86	7198.82	8031.23	5854.88	6401.87	6535.3	7585.44	7479.35	6842.03	7938.68	6618.38	8449.82	8651.98	8620.42	7675.02	6367.65	6369.72	5698.17	5651.53	6314.07	6913.29	5687.56	6760.57	5872.76
EIF3H	13623.5	15453.9	12693.7	14121	15754	15212	13163.7	15068.9	20019	19780.8	17976.8	20580.8	16888.1	18396.8	16677.9	20403.7	17213.4	19374.9	16277.9	19440.2	17532.7	19179.1	17313.6	18119.1	15159.9	19415.3	15181.8	17713.4	12965.5	15735.6	15434.8	17384.4	14742.5	18066.5	15925.1	17959.2	15394	16704.4	15113.5	17099.3	15235	16847.2	16128.7	15635.1	14288.8	15633.2	14361.2	16767.2	15979.2
EIF3I	17438.2	18785.3	18950.5	19681.4	19210.6	20000.8	17918.8	21580	19943.8	19996.5	19589.5	20993.4	18217	19276.7	17884.5	21582.9	19756.5	16419.2	17621.2	18016.8	19563.8	19974.5	21493.3	21085.3	20163	19038.5	19823.1	18999.2	18194.4	18687.2	15026.7	18928.6	17688.2	20728.6	21138.2	19796.3	18293.7	17379.9	19999.7	19629.7	18585.5	20535.3	19076.8	15656.7	17601.9	20556.8	17865.4	20482	18168.8
EIF3J	861.025	474.111	834.493		674.783	780.9	844.071			807.386	313.939				380.218	1064.8	810.473	714.928			690.854	544.848				2892.3		849.702	1079.4		734.374	432.839	970.191				648.204		780.557	931.185	653.218		1231.75		1345.93	684.102	1048.43		591.373
EIF3K	1850.44	1703.02	1693.94	1666.16	2337.45	1587.11	1851.28	1352.17	1998.39	2108.75	1088.05	2339.42	1510.89	1630.85	2145.9	2040.67	1843.15	2054.11	1222.84	2099.6	2247.61	1593.56	2030.4	2248.06	1875.73	2799.81	1922.67	1635.38	1689.07		2299.67	1184.08	2064.81	1404.06		1909.43	2298.11	2234.09	1776.9	2223.55	1448.09	1186.99	1755.1	1673.7	2050.41		1791.55		2629.29
EIF3L	3868.95	2837.46	3448	2682.48	3910.33	2922	3328.88	2802.81	4013.52	3677.17	3400.97	3275.91	2937.95	3036.35	3085.45	2734.79	3058.81	2926.27	2923.31	2969.97	2125.72	2968.85	2853.16	2771.18	3535.73	4335.05	3051.1	2832.25	3090.57	1699.38	3067.41	2261.04	3507.19	2299.23	2764.57	1480.44	3155.68	2660.46	2980.62	2564.97	2899.33	2959.75	2615.47	3345.3	3012.15	1951.73	3228.72	1763.36	3223.4
EIF3M	6676.36	7015.73	7135.01	7180.5	6097.05	6853.55	6615.5	7424.16	5972.44	6670	6041.17	6037.63	6314.24	7089.79	6605.58	5231.49	5468.12	6934.07	6806.64	5669.63	4788.79	6775.19	6042.73	5906.12	6617.72	5775.69	6103.71	6658.61	6325.5	3327.94	6853.36	6124.95	6832.5	7048.33	5881.6	2633.51	4908.75	6965.24	6328.67	6425.99	7156.43	6490.24	6564.7	7183.8	5669.75	3914.18	6514.48	2914.68	6615.35
EIF4A1	47081.9	48748.3	46399.6	46426.8	47883.6	49748.7	41751.7	52632.3	42756.4	40893.8	41810.2	40671.8	39238.2	43585.7	43943.4	42173.4	44620.9	43669.3	40464.8	46521.6	35470.2	42405.8	50402.7	48859.5	39940.7	40895.2	40481.6	39781.2	40088.7	34334.4	42124.7	41158.5	45152.1	41847.1	43064.7	38324.5	41656.2	45586.2	49739.1	51170.2	43855.3	41841.5	39666.2	37634.5	40363.6	35418.2	42057.4	33891.7	43175.9
EIF4A2	1224.54	1321.15	917.695	1405.42	1205.63	1176.67	1206.22	1049.24	1587.19	1205.71	1387.7	905.403	940.985	1046.93	1113.73	991.855	1153.79	1158.49	1050.45	1332.71	2113.27	1247.04	1228.79	1385.22	882.633	913.11	893.933	992.401	1266.43	449.743	1084.12	1275	1552.86	1676.21			1462.85	1134.29	1423.3	879.911	1124.65	1305.11	855.012	1137.79	1026.52	1553.03	1235.3	737.617	1227.89
EIF4A3	7833.29	8094.94	7596.51	8121.24	7270.47	7277.8	7696.51	7467.16	7363.36	8186.08	7776.67	7888	8369.67	7397.71	7503.54	6751.76	8548.61	7589.76	8179.32	7841.3	5227.18	7882.44	7048.71	6863.08	7495.1	6149.62	7446.94	7914.43	8346.33	5712.64	8560.27	7237.73	7923.52	7520.02	8374.1	6441.72	8317.12	6557.62	7600.3	7730.09	8146.47	7937.27	7733.9	8200.72	7327.21	5513.89	7207.9	4671.24	7788.31
EIF4E	5468.07	6442.13	6237.49	6320.1	6121.91	6439.17	6002.41	7773	6000.3	7367.22	4935.73	6416.33	5280.48	6450.97	6998.52	5699.29	6478.31	6823.71	8008.83	6217.12	7193.96	6751.24	7037.58	6200.77	6335.65	6717.05	7454.79	7084.65	7132.8	3241.3	8942.4	5277.98	6055.64	6231.05	6206.13	5335.42	6403.75	7108.42	6690	6143.69	6173.2	5123.8	6206.02	7711.52	8783.21	3629.11	8948.49	5678.8	9033.23
EIF4E2	528.557	560.902	512.36	665.631	523.52	868.682	568.963	643.943			516.46	774.546		448.224	590.886	480.475	660.041	689.762	509.269	568.921		513.779	381.315	649.062	552.932	704.74	762.3	582.552	588.608		591.897	598.419	1049.51	623.042	704.228	365.397	1056.68	612.039	470.439	589.993			571.694		859.316	998.369	551.931		587.042
EIF4G1	7786.79	6659.13	6843.58	6332.23	7600.39	6726.13	8463.01	6615.45	6244.22	6216.25	6383.6	6446.55	7419.64	7250.47	6726.5	5451.25	6896.46	7226.25	7299.05	7639.1	6165.36	6635.59	7355.86	7591.02	6683.19	5208.45	8278.91	7217.61	7090.44	1129.71	8400.44	5422.2	7869.42	6992.24	6994.21	1265.32	8424.56	7871.3	8484.42	6423.32	6393.02	5891.41	6287.82	7640.29	6818.72	2178.09	7623.48	1949.31	7884.28
EIF4G2	1362.88	984.362	1300.34	1207.74	1401.75	1645.71	1848.21	994.628	1239.67	632.57	1140.47	1071.96	1299.06	1557.07	1186.25	1336.63	1488.46	1352.62	974.085	1222.82	1011.51	978.266	868.492	1329.4	749.608	1887.3	951.51	1309.25	947.634		1468.53	616.192	1278.8	713.63	830.742		1643.47	1056.85	1697.95	1245.89	1057.91	688.268	1004.54	1381.64	1322.1		1183.96		1459.16
EIF4G3	1505.75	1084.78	1079.14	672.954	1389.75	944.402	1337.47	1005.21	668.172	1194.07	1687.12	1420.86	1754.35	1601.48	1028.1	1056.28	989.205			941.794	1159.56	756.36	1197.56	1504.04	1550.47		1201.27	929.803	1183.54		942.843	664.501	937.266	937.6	1072.58	404.787	871.552	726.733		770.927	1103.98	1110.55		957.832	884.125		1099.59		1210.43
EIF4H	769.558	673.675	966.102		1392.16	924.158	1529.84		1269.56	1269.3	1005.76	1257.74	1349.93	1192.87	1666.57	1111.18	1077.45	2400.9	1837.52	1227.07	2909.83	1204.43	1823.47	1530.62	1248.24	5965.95	1739.21	1305.52	1755.43		2370.36	1112.8	2072.86	1653.91	1359.64	1313.36	1607.98	1077.99	2724.46	1056		1564.1	793.581	1703.84	1565.37	597.097	1882.46	629.454	1811.34
EIF5	1257.93	1252.87	1074.33	1735.4	1422.4	761.567	1338.64		881.079	779.245	1280.84	1659.16	1195.47	2938.65	1189.57	1604.38	1366.51	1411.48	1899.76	1736.33	844.6	3070.04	1602.3	1729.82	1736.14	5747.36	1974.94	1196.33	1627.84		3394.9	1212.36	2241.39	1301.96	1418.85	7973.76	1870.77	1303.38	1432.73	1024.51	958.203		1551.69	1461.61	1241.52		1183.05		1295.67
EIF5B	3586.59	3129.43	3081.65	2660.24	3595.67	2920.91	3576.44	2831.1	3701.3	3495.46	3248.6	2870.34	2896.44	2536.04	3092.55	2607.74	3092.99	3394.3	3083.29	3187.12	3412.29	2581.43	3611.84	3454.66	2825.08	3000.48	3318.81	3554.69	3336.12	2060.13	3554.58	2640.98	3138.31	3318.26	2889.96	2644.91	3312.91	3457.85	3222.69	3668.67	3168.4	3086.98	3291.2	3418.52	3949.92	2744.21	3134.94	2816.88	3561.99
EIF6	9506.37	9083.56	12560.6	12073.8	9948.5	10162.6	10689.5	11430.5	10002.8	8293.76	11647.2	9864.1	10881.8	9999.34	10054.5	10657.6	11862.9	7912.87	10223.5	8297.17	12842.9	9348.75	11692.2	7491.49	10257.2	26207.3	10063.6	8245.52	13115.8	8346.88	10025.6	7597.16	11069.8	7457.08	12639.6	8221.43	13603.3	5505.8	12060.9	7362.55	9628.41	9201.33	12002.8	8697.63	9021.96	11333.1	11006.5	10406.1	9245.88
EIPR1				770.15		674.377			844.986	617.006	700.262		977.088	978.957	572.331	1020.74	484.276	1015.52	717.86	646.814		552.828	706.201		533.863		565.973	414.582			620.405	508.189		585.212		1122.88	929.23	492.77	1272.55			1042.65	610.045	668.564	908.401		568.42	732.205	686.676
ELAC2	2422.55	2542.01	1947.54	1885.63	2149.51	1784.35	1954.04	1853.52	1890.72	1798.58	1710.71	1437.88	2294.76	1837.96	2159.63	2093.73	2059.05	2196.5	2236.7	1694.87	2707.85	1843.67	1905.23	1907.81	1676.2	1006.67	1417.04	1634.42	1907.64	1145.92	2102.52	1404.42	1816.66	1877.22	1418.08	1824.07	2163.91	2055.28	1851.24	1925.6	1421.42	2108.84	2150.14	1758.37	1867.39	1271.13	2319.3	1430.61	2049.09
ELANE										669.19																113844
ELAPOR1	1896.87	1874.36	2065.35	2022.69	2125.3	2052.21	2145.17	1739.76	2288.47	2031.64	2183.36	2059.67	1198.37	1726.88	2022.92	2471.25	2018.16	1818.68	2129.55	1844.39	1078.59	2188.34	1600.84	2205.67	2506.39	1675.92	1856.9	2084.59	2149.87	1836.18	2522.27	2782.71	2637.7	2120.13	2541.98	2081.25	2381.39	1925.61	2147.91	1178.57	2866.15	2886.86	2485.37	2413.6	2378.43	2338.57	2280.76	2126.33	1926.63
ELAVL1	8702.15	8282.65	8808.43	9652.03	7454.64	8471.98	8439.31	9493.93	8267.63	8162.31	8933.16	9420.56	8990.78	9040.13	8839.1	8788.99	8479.59	8358.7	8884.98	8705.7	8461	8473.48	9410.08	7863.33	8951.87	9147.44	10045.2	9362.05	9894.65	9228.37	8615.52	8943.37	8303.63	9874.48	9630.17	7710.57	9047.52	9343.61	8821.93	8761.77	9498.53	8867.41	8885.36	9246.21	9114.78	7996.35	8815.55	8379.97	8963.66
ELMO3	1085.66	472.351	615.621	609.318	518.675	599.655	647.616	491.77	463.827	428.665		609.572		626.581	468.222	455.622	295.371	550.654	514.826	426.523		595.745	745.04	262.908	459.859	447.216	791.669	586.984	256.687		846.813	564.213			576.075			587.376		336.63	707.831		624.422	450.009	248.064	642.031	560.7		689.915
ELMOD2	1091.16	1320.59	1524.82	1942.8	1534.59	1609.35	1945.5	1746.48	993.176	1115.84	1772.15	1075.69	1645.81	1113.98		1346.25	1687	1511.88	1438.06	2007.5	1584.77	1969.61	3985.41	3096.95	1555.95	1551.67	1108.12	1827.66	1379.04	1175.69	1218.76	1584.57	1762.43	1699.57	1628.79	1767.26	2934.87	2090.01		1333.31	2091.58	2214.52	2816.96	1256.14	1776.51		1968.63	1347.91	1674.23
ELOB	2569.74	3059.46	2504.26	2551.74	2447.26	3800.15	3097.67	2691.42	2823.8	3011.03	3337.35	3750.9	3620.29	2911.95	3042.08	2767.28	2866.01	3400.5	2761.46	3300.85	3473.29	2561.36	2791.92	2930.2	2956.74	3788.5	3307.26	2511.49	3590.18	1460.69	3312.17	3270.18	2771.5	3506.67	3269.86	2799.86	2636.34	2632.57	3164.96	3089.69	4286.74	3304.42	3720.54	3699.97	3023.18	2288.36	2983.72	1907	3757.49
ELOC	3758.36	5694.36	3593.84	5127.8	4984.76	5473.42	3809.38	6205.96	4559.51	5430.09	5223.66	5786.49	5642.6	5363.14	5132.86	5392.35	6219.27	5155.28	4469.73	5302.5	5251.23	5781.08	4954.46	5151.35	4800.94	4374.08	5139.08	5174.4	5107.64	5206.25	4429	6046.54	4710.74	5531.21	4957.8	4788.09	4738.04	5539.85	4082.89	6675.96	4340.35	4903.19	5377.5	4715.01	5717.74	5963.39	4447.16	6014.72	5534.84
ELOVL1		286.039	250.912		416.856	290.664	601.769			229.743		151.181			381.231	239.872	402.716		314.049	137.068	102.197				344.426	565.065					144.372		244.753	229.309	733.417			200.417		283.872	295.796		239.249		168.292			545.555
ELOVL5		2164	1441.69	2183.77	1715.89	1963.69	1203.44		3227.61	2234.48	2802.55	1970.28		1493.12	2574.17	3167.91	2017.9	1266	3223.86	2158.52	798.698	1390.45	1486.05	1897.14	3833.81	1768.7	3725.97	2902.42	2530.12	3017.48	2127.79	2446.19	2714.15	2610.5	2655.28	1681.93	1335.51	2113.93	1974.22		4299.94	3905.17	2512.73	3590.33	2954.51	4654.45	3614.52	3661.3	2711.16
ELP1	1952.32	2244.45	2717.67	2570.61	2310.91	2420.75	2562.95	2208.49	2124.3	2591.13	1831.59	2470.59	2001.16	2250.35	2088.52	2265.05	2313.83	2436.75	2369.45	2452.84	1684.43	2191.54	2209.86	2404.28	2272.21	1879.35	2327.65	2173.82	2475.77	2455.86	1917.66	2657.54	2470.8	2256.31	2576.33	2290.91	2621.25	2460.33	2216.55	2449.6	2241.27	2453.43	2107.03	2533.81	2482.9	2345.26	2521.42	2418.19	2154.01
ELP2	2935.92	2701.32	2955.21	3263.92	2873.69	3676.08	3232.25	3723.33	3922.8	3951.49	3499.23	3786.97	3644.83	4115.54	3482.44	4017.21	3886.87	3152.76	3842.91	3876.01	2759.28	3319.08	3434.2	3093.61	3971.18	3694.14	4156.44	3346.77	3672.07	3208.03	3187.7	3911.24	3913.49	3131.75	4021.14	4704.79	3501.85	3245.03	3693.72	3686.01	3962.09	4249.94	3641.88	3010.24	3717.36	4173.61	3743.73	3714.22	4867.73
ELP3	3917.68	3432.27	4202.53	4427.99	4315.89	3765.89	4700.75	3689.49	4593.47	3931.76	4704.52	4721.8	3986.72	4149.21	4227.4	5378.89	4188.6	4370.45	4550.57	4148.39	3528.36	4417.26	4408.65	3740.29	4890.9	3292.52	4276.96	3997.5	4825.58	4364.63	4131.06	4398.87	4390.64	5049.73	3950.94	5235.17	4451.14	3666.66	3691.29	3591.75	3872.25	4553.21	4096.17	3801.57	4489.86	4201.81	4322.42	4865.35	3897.09
ELP6	513.769	691.641	557.838	743.651	342.502	508.456	657.294			601.05	722.28	1201.37	1037.21	850.995	743.529		780.006	785.113	425.089	611.009		769.657	982.303	537.626	852.5		912.003	271.299	706.031		897.784	1166.58		516.89		734.464	1195.49	861.994	622.893	591.764		530.787		569.004	754.913	397.031	681.902	590.035	347.597
EMC1	1773.01	1611.82	1460.02	1520.38	1563.73	1671.62	1678.82	1884.3	1400.77	1683.29	1657.49	1358.84	1664.16	1604.39	1395.03	1265.37	1450.9	1249.7	1299.61	1545.51	1245.57	2042.27	1411.58	1441.12	1684.88	1451.61	1858.1	1485.21	1713.16	1414.32	1636.95	1454.17	1626.44	1642.8	1928.97	1838.71	1318.61	1554.16	1305.81	1542.4	1617.64	1504.59	1677.46	1321.91	2258.34	1823.39	1183.35	1072.74	1205.88
EMC2	1038.61	699.754	687.101		470.747	573.957	986.841			724.556	898.486	1236.93	865.159	890.633		1016.2	755.635	999.616		1357.96	984.466	1634.82		939.449	1067.44	3293.91	823.51	889.002	1374.58		1095.98		980.051	1172.89				646.024	1011.93	881.501				1061.83	997.254		1019.09		644.711
EMC3	799.092	838.844	1175.69	1048.84	830.336	904.087	781.07	1181.52	639.697	1004.02	1126.04	629.933	244.13	523.838	1380.55	966.396	1107.38	849.664	743.889	787.994	425.553	617.572	765.27	904.967	753.901	384.393	1048.81	1051.8	836.202		864.641	538.129	770.441	989.966	849.11	716.478	764.016	907.72	1147.46	864.923	881.732	889.976	1004.33	980.988	881.378	494.88	940.549	410.749	944.71
EMC8		409.22		264.534		490.888		279.762	348.14	492.103		243.952	728.796		436.419	286.082	411.276	521.213	85.8557	509.845	445.719	551.606		296.04					213.938								377.64	576.804	385.228	522.771	469.898		664.439	216.709	539.523
EMD	2142.08	2075.44	2303.94	1891.83	1802.41	1904.83	1672.75	1263.44	1666.75	1478.89	2317.22	954.964	1179.58	1173.85	1491.88	1826.51	1224.38	980.648	868.704	1560.04	1829.57	1256.44	1779.44	1256.48	1413	4751.09	875.114	1542.86	1730.85		1369.7	1281.09	1327.56	1531.13	1539.66	1302.32	1687.54	1399.4	1245.14	1835.8	1647.64	960.492	1750.95	1376.69	1470.17		1463.7		1561.86
EMG1	6642.63	5610.41	4913.51	5568.65	5303.36	5061.61	5645.91	4262.13	4684.08	5014.08	5606.83	5101.63	5793.9	5623.75	5140.11	5881.53	6015.22	5395.14	4266.3	4598.88	5177.83	5047.39	6154.02	5243.08	4957.54	4364.7	6063.37	5445.14	5427.15	5142.28	5133.4	5323.39	6155.11	4925.54	6081.28	4524.68	4923.54	5121.03	5467.08	4343.72	5497.18	5145.35	6221.07	4837.47	5253.88	5809.86	4926.93	4524.91	5720.68
EML2	2352.06	2608.25	1795.69	3106.74	2709.34	2767.17	2444.63	2804.15	2475.54	2717.88	2837.45	3183.39	2900.66	3214.07	2753.37	3367.67	2776.69	2761	2518.43	3071.06	2090.6	3036.1	3064.06	3077.3	2744.52	3433.04	2834.05	2720.64	2398.19	2816.01	2008.87	3270.58	2359.85	3133.8	3280.72	3713.11	2280.54	2514.27	2474.27	3290.14	2701.32	3171.38	2541.34	2308.94	3082.71	3339.05	2616.14	3439.26	2326.85
EML3	1751.04	1603.24	1529.36	1636.03	1704.38	2061.45	1594.03	1807.25	1482.27	1778.39	1691.32	1996.01	2114.78	1405.61	1947.75	2548.42	1837.75	1848.94	1490.2	2121.54	1918.74	1706.42	2290.57	2051.82	1825.27	1829.75	1619.22	1734.52	2185.94	1900.76	1868.51	1858.2	1596.89	1994.85	1748.16	2169.03	1912.05	2239.05	1568.02	2065.46	2275.56	2381.95	2286.05	1740.98	1708.31	1869.54	1553.15	1982.74	1861.71
EML4	2278.95	2536.76	2423.01	2732.15	1969	2491.17	2217.12	2359.23	2567.08	2763.82	2695.4	2971.7	2700.13	2433.99	2381.4	2714.85	2801.36	1833.23	2534.88	2448.22	2519.23	2611.79	2488.37	2723.63	2298.4	3167.94	1756.91	2502.9	2339.4	2386.82	2319.37	2740.51	2076.26	2872.41	2587.65	2319.72	2902.18	2838.9	2784.47	2902.91	2428.59	2855.52	2770.36	2235.46	3066.41	2227.76	2429.74	3436.04	2284.75
EMSY	390.371		237.938				499.742	501.397	788.459	521.347	553.35	627.645	849.653	604.449			444.76		482.782	569.443		523.946	707.335	954.823			805.311	718.123	700.528	835.982	685.668	697.964	834.532			540.451	455.605	497.134	342.568	444.635		587.733	619.316				502.385
ENDOU																										7521.77										2688.12
ENO1	50676.2	60297.2	45868.4	56859.1	40271.1	63682.6	44810.2	82910.3	67983.6	80737.9	64089.8	70491.7	68970.3	82059.7	66359.8	68185.3	68576.2	85786	62741.9	79650.1	55589.3	73601.6	59472.2	85046.4	63647.5	135772	52625	89488.2	63048.3	38286.8	71062.3	81185.7	68522.6	87084.5	62608.7	52707.2	63328.8	81477.8	64989.4	77564.4	79522.2	72763.2	76049.7	76858.8	74539.7	43004.9	85953	40986.6	84331.5
ENO2	360.938	697.46	587.171	183.024			759.395				463.78				673.318		542.891					758.599	588.111				762.434	1046.07			780.645					690.276					658.029				583.343		674.744		494.709
ENO3	6451.77	10687.5		8959.39	7768.55	9808.59	14622.7	15162.8	10866.7	14522	14293.5			13475.6			11020.2	13953.7	8885.67	12970.1		10234.8	7184.57		8077.9	12443.7	8672.36		7965.94		11080.7	12044.2	10897.4	11748.4	8851.37		12021.2	9688.64		13379.7		15269.5	9354.72		9071.59		12699	6578.75	7504.89
ENOPH1	1418.34	1060.02	947.982	896.131	1373.59	657.032	1247.14		1212.24	1300.29	1258.62	1459.75	1533.28	1241.7	1069.72	1188.48	1110.54	1638.87	1005.86	1238.29	542.532	1255.77	1120.01	1276.72	1111.01	1210.49	1738.74	1197.92	1299.43		2064.5	979.987	1208.83	1381.81			1502.73	919.416	1233.06	1190.58	769.404	829.328	1283.45	1774.29	1560.33	959.218	1199.99		1234.91
EPB41	973.263	769.798	485.739	724.868	506.018	722.569	981.846	1021.68	1062.06	1307.94	830.71	1104.77	797.627	757.305	617.786	974.804	551.833	942.008	1141.47	896.694	953.492	815.504	1106.37	623.429	1023.21	1953.42	566.878	684.682	902.329	680.707	898.912	807.288	921.814	935.305	382.807	461.55	554.89	692.35	1139.27	541.985			915.191	668.922	897.568	823.994	829.946	1227.05	896.252
EPB41L1	892.538	1014.48	810.912	782.858	979.766	1282.56	872.795	1177.08	694.265	1164.7	1204.87	1812.03		1113.22	607.582	921.643	1066.94	712.028	839.667	1070.72	1011.58	1023.87	1246.81	812.648		479.091	1080.37	939.817	852.195	982.98	925.471	1019.06	1257.02	1027.46	1383.47	771.573	608.764	1014.79	859.518	901.046	528.513	1075.03	1104.75	957.964	995.561	1026.44	822.019		1235
EPB41L5	645.098	1103.26	671.984	707.407	785.218	633.847	790.348	952.575	976.467	757.966	736.215	363.312	691.559	1230.8	920.278		1111.46	907.222	796.043	675.64	1132.29	566.87	768.491	645.678	683.457		587.601	413.798	770.935		726.974		1042.61	950.596			715.101	628.863	806.671	699.139	743.815		372.026	750.066	664.404		841.642	1772.68	884.527
EPCAM	7818.56	6836.47	6949.74	6734.86	6676.36	7639.08	7280.48	6148.49	8408.81	8257.87	7053.95	7852.8	6317.83	7804.93	6330.69	8020.8	7504.58	6620.03	8125.24	7196.84	5795.05	6208.28	6665.9	6940.81	7760.3	4042.82	7564.45	8079.73	8650.26	6182.09	5686.85	8829.85	6793.21	7418.97	5803.61	5227.95	6329.75	7478.81	7251.41	8287.62	7655.59	10028.2	7882.33	7940.62	8101.63	6901.3	7783.63	5060.64	7476
EPHB3	2365.21	2256.16	2443.63	2787.6	1930.76	2546.15	2197.19	2485.32	2274.16	2766.79	3539.4	2314.56	2620.77	2111.4	2747.96	2883.2	2946.19	2723.71	2771.53	2554.24	3057.41	1866.08	3081.33	2974.55	2553.16	2566.2	2409.5	2834.72	2731.37	2959.49	2361.39	3399.11	2937.24	2549.75	2615.04	2764.39	2573.04	2392.44	2839.25	2908.1	2269.58	3091.81	2210.79	2006.43	2399.86	2570.68	1870.51	1913.14	1863.22
EPHB4	2490.76	2472.14	2441.19	2705.73	2408.39	3079.8	2478.61	2842.14	2287.01	2316.51	2856.15	1839.78	2588.91	2136.01	2227.31	2480.04	1864.02	2251.66	2631.9	2352.68	1952.34	2211.11	2112.78	1965.14	2255.8	1226.76	1880.37	2372.31	2175	2720.73	2746.27	2672.24	2047.17	1912.59	3086.34	1855.81	2668.36	2524.81	2382.7	2204.32	2866.25	2053.19	2256.85	2230.31	2215.95	1896.49	2411.4	1508.85	2369.36
EPHX1	508.612	694.317	475.245	461.105	523.467	766.987	934.886	967.458	1201.58	696.509	704.604	627.595		736.041	487.621	631.223	1132.08	694.253	797.292	818.704	889.945	901.379	837.331	709.192	764.956	1120.7	536.975	1269.72	570.209	548.911	587.232	398.831	697.051	713.149	633.643	1014.72	645.88	710.633	984.321	1368.99	767.135	855.629	556.393	662.711	969.723	855.856	811.92		685.906
EPM2AIP1	1854.32	1484.56	1590.04	1450.53	1113.5	1450.03	1644.86	1664.18	1304.27	1362.16	1437.45	1255.2	1715.97	1456.65	1455.1	1332.24	1840.57	1352.75	1996.92	1384.71	1661.83	1541.32	1669.84	1659.91	1474.01	2638.06	1377.91	1529.86	1619.55	1327.72	1382.02	1762.36	1370.21	1665.21	1627.35	1257.68	1671.31	1446.03	1392.56	1825.36	1772.3	1712.62	1376.22	1695.94	1583.02	1157	1564.28	1298.1	1215.7
EPPK1	3716	3192.37	3473.24	3193.47	3375.91	3486.05	3693.44	3345.63	3308.7	3620.3	3427.99	3138.29	3438.9	3073.15	3460.08	2969.87	3330.32	3237.18	3171.15	3345.14	3698.06	3338.59	3466.76	3593.98	3452.03	36355.7	3641.71	3737.69	3609.79	2407.99	3573.87	3209.14	3547.34	3090.5	3198.5	5380.64	3410.16	3800.11	3477.32	3506.4	3355.33	3000.59	3392.82	3055.65	3288.42	1953.94	3159.01	1646.92	3310.76
EPRS1	10694.3	11513.9	11688.3	11102.5	10697.9	10798.5	11092.5	11187.1	10419.9	11247.4	10225.7	9995.74	10494.1	10533.7	11323.5	9434.44	10750.6	11104.2	10883.2	10651.5	11793.9	10432.5	10702.7	11381.2	10128.4	10043.5	9995.5	11015.7	10731.5	6284.89	10719.1	9603.52	10514.7	11313.5	9831.36	6632.67	10079.2	11435	10779.2	11007.4	11586.7	10190	10335.5	11346.1	10895	7491.3	11339	6936.39	11151.4
EPS8L1		773.463	601.243	747.508		571.781	1011.54	833.916	393.871		854.654	1035.85			878.012	1017.11	1011.62	743.157		1052.8	543.154		1051.27	1182.08	968.325	6367.46	950.369	1095.76			778.056			513.044		987.528		664.987			397.811	772.867	797.134	862.484	703.629		832.652	603.753
ERAL1	1503.32	1151.18	1737.41	1352.38	1135.95	1601.69	1889.2	1865.91	1140.2	1444.51	1122.64	1614.16	1518.16	1269.4	1310.65	1607.09	1870.91	1353.25	1436.4	1406.06	1853.46	1124.45	2103.54	1862.71	1450.35	1338.32	1559.32	1621.73	1609.24	1131.85	1525.64	1406.02	1525.64	1409.04	1853.06	1539.33	1901.34	1422.41	1745.59	1724.09	1754.86	1453.03	1448.37	1825.86	1535.53	1603.62	1519.36	828.63	1234.63
ERAP1	529.101	723.444	1143.83	575.313	470.835	404.229	521.153	551.17	661.518	824.375	769.62	836.273		697.129	517.777	638.148	800.738	596.271	800.633	627.23	380.193	404.724	649.658	653.882		1462.03		780.957	776.625	614.673	828.096	775.656	945.779	711.451	832.625	1008.49	818.226	712.764	744.846	525.276	982.638	946.07	837.188	427.341	534.779	960.232	761.328	917.096	416.214
ERCC2	1006.43	1354.94	1248.61	716.008	1177.15	1202.67	1254.16	1275.04	1095.57	808.392	1048.77	1075.02	1145.6		967.425	558.97	651.205	1094.99	1700.35	973.14	1164.55	626.118		1226.82	755.039	835.86		803.871	923.591		902.931	590.859	612.883		740.743		1270.5	925.775	667.928	1008.96	1134.04	1027.46	895.478	792.217	1002.52		1041.64		803.286
ERCC3	1170.24	1024.21	967.088	356.802	1151.75		1120.81		849.583			1312.96			985.3	1113.1	679.679	755.513	799.852		1021.86		1330.76				885.88	992.318	961.445		701.798		758.804	778.114	899.795		1045.67	782.278		755.905			940.618	1003.23	1662.07				1040.15
ERCC6L	1080.89	364.457	784.698			648.995	577.464			722.826		603.135		339.228	905.356	700.057		779.157			604.067	597.809		710.37			616.594	585.938				884.805	329.499		772.202	563.757		857.41	660.213			960.568	759.859	680.486			378.762		816.49
ERGIC1	3801.68	2996.63	3926.01	3828.32	3582.59	3089.97	3838.17	3620.12	2577.09	3636.11	3539.58	4180.03	3250.12	3328.42	3533.03	3397.2	3685.5	3125.18	3799.83	3724.79	3297.43	3598.21	3549.14	4061.96	4339.04	3446.23	4420.92	4090.01	4543.92	2458.77	4224.76	3311.99	3881.23	4127.6	4377.47	3975.11	3896.87	3952.11	4055.04	3470.34	3875.53	3785.97	3730.18	3886.36	4570.21	3427.78	3568.09	2947.44	3404.88
ERGIC2	1666.26	2048.33	1718.41	1717.19	1126.89	1420.59	2236.49	1940	1941.97	1766.99	2196.03	1843.57	1895.41	2099	1929.91	1851.05	1443.4	1977.31	1596.17	2518.09	1209.92	1427.96	1838.17	1561.68	2497.86	2888.58	2205.56	1677.48	2438.46	2600.12	1824.94	2050.21	2192.12	2536.45	2986.4	865.869	1882.87	2188.37	2077.79	1691.55	1848.5	2368.07	2389.42	1803.5	2173.15	1278.36	2188.09	2314.39	1944.38
ERI3	2073.53	1716.92	1812.11	1835.38	2526.08	2291.04	1665.16	1518.21	1847.44	2456.31	1600.99	3091.61	1505.48	2364.18	1976.72	2327.23	2113.4	1856.51	1945.7	2417.47	1454.06	2275.93	1983.66	1892.31	1882.92	2445.32	2510.14	2126.71	2220.38	2268.53	1529.75	2284.67	1587.26	1484.2	2275.6	1905.58	1444.7	1950.61	1657.18	1800.64	2172.66	3070.05	1931.49	2224.52	2032.85	2399.83	2251.8	2346.67	3043.75
ERLEC1	1044.78	1247.53	992.305	1369.66	1177	1474.88	1314.09	977.09	1473.27	1630.05	1476.11	1465.19	1965.9	1468.06	1293.41	1159.24	1464.5	893.698	1268.06	1067.48		1221.5	1435.66	1022.77	1296.79	2156.84	1450.76	1944.93	1617.37	1820.44	1233.68	1481.82	1388.14	1319.18	1510.29	1601.34	1335.07	1034.37	1255.48	1187.15	1649.91	1979.58	1355.87	1198.45	1764	2358.37	1254.02	1955.58	1160.95
ERLIN1	1380.27	1796.57	1233.98	1877.64	972.703	1940.47		1213.87	1122.12	1258.46		1551.39	1860.47	1414.16	1973.06		1344.02	1003.67	1687.85	1825.34	1350.84	1843.16	1304.27	1355.84	1359.1	874.869	1923.95	1161.05	1190.78		1140.11	1094.23	1308.07	1583.04				1996.15	1429.81	1780.32	798.887	1659.59	1156.05	1450.42	1983.33		1773.34		1804.08
ERLIN2	2901.16	2772.44	2678.6	3814.55	3277.86	2191.9	2003.98	3937.66	3673.41	4067.91	4289.64	3925.95	4818.15	3511.36	2996.42	5195.58	3398.54	1700.85	3243.34	4830.19	5754.26	3953.34	4269.25	4078.21	3509.99	4058.34	4579.11	3035.31	3568.79	2839.29	2863.91	3595.41	3056.44	3796.21	4336.05	6637.9	3897.25	3098.96	4321.82	3312.18	3281.22	2874.47	3684.05	2587.72	3444.85	4892.51	2775.17	4103.94	2746.92
ERMP1	2074.61	1660.86	1629.43	2255.64	1492.48	2943.93	1630.36	2022.44	2810.77	2056.05	1306.5	2106.12	1114.23	1913	1852.66	1480.9	1689.11	1136.09	1458.3	2195.76	1535.65	1697.92	1098.86	1866.52	1953.34	2035.07	862.682	1502.84			2046.35	2171.97	1230.5	1930.58	1848.31		2202.2	1346.48		879.936	1355.66	2297.49	1565.96	1875.9	1180.27	2591.8	2721.67		359.857
ERO1A	1685.62	1098.13	960.561	1275.66	1774.74	1206.02	1183.99	1932.49	1588.02	1187.74	1467.3	1818.47	2062.64	1727.97	1714.41	1293.68	1451.86	1311.75	1892.19	1902.37	1405.83	1695.83	1592.85	1774.47	2492.51	5509.12	1970.7	1475.32	2347.31	938.291	1563.38	1059.75	2151.57	1337.39	1620.35	3313.06	2151.21	1581.48	2013.69	1474.04	1562.23	1535.63	1137.64	1918.61	1929.74		1630.27		1656.56
ERP29	8007.6	5244.56	6730.83	5165.91	6647.75	5796.5	7486.24	1604.77	7523.2	7463.68	6883.31	7761.75	8088.49	8762.4	8194.11	6221.71	7233.79	9613.02	8014.37	7709.77	7430.52	7511.45	7016.16	6678.16	8136.03	18108.8	7915.04	9356.04	7926.48	2644.34	11225.8	5600.76	7792.87	7764.91	4101.57	2443.64	6809.87	7350.8	7093.99	6713.2	7051.76	5482	5508.38	10136.9	6695.39	2731.63	8523.59	1676.62	7661.59
ERP44	6550	5226.76	6037.35	4702.92	5314.99	5102.99	5795.69	3235.47	6114.78	6524.09	4910.85	5209.94	4369.97	5438.51	5873.21	5347.82	5814.4	5904.68	5581.93	4805.45	5195.34	4852.64	5982.5	5433.89	6032.78	8253.32	5620.2	5686.84	4998	2665.88	6505.36	4913.71	5139.02	5346.72	4363.11	3609.52	4975.22	4864.62	5820.33	5304.67	4920.46	6077.41	5287.44	6463.33	6355.06	3229.83	5667.49	3259.93	5084.76
ESF1		474.321	248.341	479.657	507.159	337.901	378.706	294.763	462.501	345.483	456.837		394.833		443.319	231.458	378.754	370.847		241.78	499.536		634.896	284.268	264.643			408.767			280.518	385.526	89.8453	374.146	284.519		499.492	591.085		488.468				365.856	387.751		393.229		329.325
ESR1	472.751	375.997		326.73	366.796		228.675	358.964	191.763	97.2207	174.968			448.042			440.503	352.937		350.091			360.677	356.598				325.733	420.344		271.63		504.223		308.755		211.275	181.247	352.14					208.3	160.05		386.786		450.68
ESRP1	6762.12	5230.91	5696.12	6734.32	6406.02	6914.14	5243.78	5038.87	5391.74	6025.9	5934.66	6248.96	5268.85	5251.33	5802.87	6377.11	6477.73	5989.21	7083.67	5917.68	6319.07	6736.23	5231.34	6303.12	5799.53	6836.21	5350.79	6753.23	6659.42	4713.71	5594.63	4916.41	6607.31	6081.72	6232.03	4784.85	5218.99	6677.75	5914.97	7439.44	6597.91	5669.8	6920.51	7430.03	5601.79	6256.48	5653.99	5113.29	6723.24
ESRP2	1911.87	1333.66	1749.99	1522.09	1367.71	1837.28	1950.35	1314.09	1573.94	1809.69	1290.31	1398.78	1722.52	1729.4	1299.91	1441.69	1660.12	1493.27	1484.13	1941.64	1325.52	1404.71	1738.05	1696.57	1481.5	2735.23	1634.28	1671.42	1376.72	1142.16	1897.66	1370.06	2024.58	1638.39	1355.97		1746.89	1684.21	1938.73	1750.52	1670.79	1421.96	1614.25	1963.93	1133.77	1251.86	1335.27	1169.3	1730.18
ESYT1	3862.21	3543.01	4254.22	3622.42	4091.31	3739.24	4282.3	4059.5	3567.63	3710.13	3241.85	3290.45	3570.64	3608.11	3923.19	3036	3788.76	3789.97	3610.17	3710.73	3511.66	3748.44	3778.84	3878.27	3487.6	2928.49	3728.87	3909.79	3765	2681.59	3816.21	3213.89	4495.61	3807.73	3583.04	2629.23	3659.56	3912.64	4004.31	3687.57	3644.26	3244.14	3199.51	3469.77	3548.29	2888.63	3603.49	2458.13	3872.26
ESYT2	4666.05	3745.22	4272.56	4129.14	4420.8	4171.91	4314.3	4505.39	3922.21	3791.62	3904.35	4037.73	4261.6	3091.6	3433.49	3607.88	3456.58	3721.67	4027.2	4035.92	4100.16	3997.1	3362.69	4179.9	4124.65	3548.73	3813.96	3728.71	3733.42	3210.68	3599.65	4071.93	3439.17	3678.33	3788.69	4333.87	3697.63	3593.69	3535.32	3731.81	3696.56	4516.42	3240.74	3626.27	3356.84	3065.3	3609.21	3156.13	3080.59
ETF1	16421.6	19631.3	18862.3	20642	20370.5	23877.8	16845.2	19476.7	17906.3	19609.2	20476	18272	18816.6	19468.3	18400.8	20271.7	18851.3	21817.6	18697.4	21724.5	11153.5	21179.6	20727.6	21494.3	16838.6	17532.8	22310.2	20179	18366.8	13567	21862.9	22436.7	21933.5	20405.7	22898.2	17200.6	26441	23412.7	21278.4	21748	19615.2	20662.9	20022.2	20390.8	22095.7	18688.6	20729.3	15226.5	23347.1
ETFA	6520.28	9062.43	7609.59	8248.81	6628.21	9799.5	6660.65	9475.62	8206.38	9117.78	8177.09	8333.13	9293.09	8246.96	9025.17	9482.06	8638.49	9913.38	9449.48	9561.82	9140.74	8842.78	7558.86	8950.57	8654.17	5782.93	7815.52	9579.23	7873.88	5134.8	8467.14	8878.93	8209.05	8988.46	8702.13	5812.76	8040.43	9655.21	7985.1	8686.62	8451.62	8777.35	8831.37	9006.8	8261.34	7004.79	9526.83	5604.87	9498.95
ETFB	2840.11	2562.06	2360.71	1537.93	2941.64	2795.39	2454.03	3587.85	3274.97	3155.21	2717.49	2411.54	3668.87	2688.34	2912.64	2087.85	2434.84	3753.14	2587.78	2438.03	3494.02	3060.41	2887.36	3439.28	3674.91	3074.75	3607.36	3847.51	2920.06		3680.05	3563.99	2902.16	2266.37	3570.56		3126.01	3115.89	3496.19	2714.44	3307.3	3712.19	2271.31	3416.95	2453.17	1205.89	3361.3		2628.59
ETHE1	295.405	596.287		367.312	421.761		511.148			433.393			493.394	528.799	374.808		423.366	787.669	527.476	361.536	2175.75		977.079	723.4	348.367	3685.63	353.945	215.734			193.3	603.476	851.929	548.961	573.437	542.257		424.129					424.989	374.722	335.246			502.565	748.855
EVPL	1033.62	1097.04		1528.08	916.302	1098.02			1211.02			1260.49		798.075	1044.61	805.107	1615.32	751.103	1244.48			652.914	969.827	1305.95	1345.85	10098.2	1112.84	946.476	1050.36		871.341	1343.28	1337.47			4093.93	1582.58	971.988		1720.55	1040.62	1024.35				2785.79	1043.43		892.231
EXD2	1378.87	1117.21	1299.46	1105.15	1281.96	1423.81	1961.82	590.538	1743.3	1398.11	1077.04	811.421	1109.16	852.2	1014.87	1953.89		1108.63	1107.8	1164.67		1412.49	1585.75	1351.83	1301.22			1232.92	1383.43		1124.22	1798.71	2140.13				1542.41	943.65		939.555	489.114	1211.11	1266.42	856.854	1279.78		1126.75	1847.26	1171.2
EXOC1	1115.85	1041.55	1126.4	783.186	888.703		1511.33	1280.13	1190.2	873.51		1030.17	1191.99	1052.58	1282.03	870.541	1166.66	1261.4	1022.29	884.191	1083.23	1235.21	1219.4	1123.15	1275.26		1043.43	1031.35	937.612	1267.83	1165.93	1150.63	1503.23	1125.88	1249.36		926.421	1461.6	1387.29	1196.32	1072.54	1413.67	1255.03	1344.78	1174.99	792.443	1369.55
EXOC2	1641.31	1052.44	1320.14	872.407	1218.56	856.035	1404.36	1019.17	1119.16	1205.18	1279.89	1318.47	1297.45	1551.23	1100.59	803.926	1154.11	1378.36	1542.67	1342.73	9091.85	1096.23	2188.28	1897.32	1924.57	1401.54	1261.06	1541.74	1278.71		1459.97	989.903	1160.01	1281.87	1440.81		1681.35	1228.93	1654.52	1152.01	1221.32	1481.95	1283.87	1194.89	1212	624.545	1250.12		1524.58
EXOC3	1291.66	1279.16	1351.92	967.717	1298.7	902.58	1530.14	429.048	1018.21	1275.57	1195.17	1150.89	1105.56	1428.18	1286.07	1197.12	951.876	1284.98	1385.71	997.617	1058.77	1600.66	1097.11	1450.12	1261.44	2249.5	1932.11	1158.22	1247.78		1100.64	930.311		193.879		1212.41	1239.63	1336.93	675.992	1309.4	779.574	1659.99	1140.89	1341.89			1099.17
EXOC4	1118.41	1558.09	1432.75	1626.09	1288.5	1354.41	1648.12	1538.83	1089.55	1349.67	1528.48	1365.06	1351.52	1625.35	1156.41	1180.47	1384.7	1790.86	1538.12	1680.12	1626.6	1360.09	1592.46	1582.23	1567.63	1954.37	1854.37	1977.13	1238.91		1720.71	1321.17	1399.86	1838.03	1395.24		1532.18	1542.99	1661.5	1415.18	1636.85	1750.49	1555.07	1690.69	1444.98	617.103	1381.97	1058.66	1386.5
EXOC6	900.923	681.2	1088.5	397.947	479.274	837.676	823.778	583.812	404.79	785.313	696.274		533.385	479.04	663.63	829.421	306.66	619.002	568.955	522.485	469.066	563.743	1038.81	832.258	1186.75		895.576	1224.67			986.208		873.284	381.56			710.528	386.038	852.185	309.161	613.191	564.288	907.852	807.05	780.708		309.924		592.15
EXOSC1	5789.51	5416.45	5389.96	4201.63	5743.28	5083.85	5305.29	4925.78	5127.36	4880.08	4917.95	5433.83	4800.8	5077.99	4504.29	5167.06	4833.39	4005.66	4887.37	4656.1	3933.83	4305.92	4852.55	3660.59	5037.22	3210.16	4273.8	4892.88	5376.85	4781.48	4473.42	5594.21	4604.95	5266.74	7295.88	4557.12	4324.78	3727.22	4088.79	3952.32	4838.29	4143.68	5015.32	5739.68	4464.08	4882.52	4612.36	4592.96	4397.09
EXOSC10	2285.89	2222.22	2221.11	2323.48	1948.92	2303.49	1941.72	2431.79	1838.98	1845.11	1880.05	2168.28	1995.42	2610.78	1737.83	1740.51	1942.97	2335.18	2138.03	2322.6	2114.14	2091.37	2528.7	1677.28	2154.26	1564.41	2118.75	2206.62	1511.26	1734.52	2040.97	1833.35	2228.09	2358.83	2080.33	1906.89	2130.57	2291.74	2442.24	2512.35	2373.41	1885.33	1994.22	1896.15	2050.71	1756.44	2195.54	1229	2153.8
EXOSC2	4707.1	4631.43	3864.29	4411.06	4589.77	5416.9	4590.51	5846.8	4560.96	4836.4	4200.08	4515.41	4241.47	3742.47	4637.8	4311.85	4950.35	5373.64	5522.34	4994.5	3514.89	5152.69	5252.81	5648.59	4579.83	4207.45	4900.5	5348.46	4918.92	3226.6	5123.97	4829.81	5175.3	5167.67	3983.7	3759.37	4111.78	5700.87	4642.83	5306.73	4925.73	3950.08	4991.35	5499.21	4835.98	3840.31	4949.41	3181.92	4615.61
EXOSC3	685.258	613.296	459.134	393.899		494.81	105.401		222.253	322.801			374.562			522.517	645.625	323.514	279.298		320.45	480.439		441.777			184.151		290.325		577.071			222.158	607.276		584.478	521.977	699.158	535.719			210.825	216.853					255.154
EXOSC4	1383.81	2307.01	1342.97	1775.58	2064.72	1308.49	1243.3	1465.64	1850.87	1573.49	2094.06	1824	1260.14	1503.42	1423.98	2034.98	2054.86	1886.33	1830.33	1589.45	1750.68	2424.14	1200.62	1558.01	1764.11	12926.9	1673.37	1698.75	2009.33	2144.29	1925.84	1791.73	1878.92	1557.02	2011.94	2068.44	1924.2	1788.19	1250.3	2304.39	1919.95	1190.17	1456.74	1399.42	2293.53	999.567	1313.88	2870	1670.65
EXOSC5	661.715	1026.11	452.572	457.021	659.586	654.838	228.424	475.885	1178.51	727.765	842.715	617.184		585.585	637.968		503.384	583.534	372.751	712.365		627.134	604.859	603.857	661.385		546.347	432.457	409.166		745.291	631.84	740.588	426.022	701.603		629.55	774.776	498.141	862.534	516.769	546.631	663.092	734.738	467.778		715.227		627.652
EXOSC6	136.413	199.09	162.848		315.473	182.585	122.77		380.639		194.277			492.65			187.076	581.224	131.272	166.89					358.812	581.663			289.882		291.538	211.068	160.859						170.673	197.864				281.361			199.304		166.593
EXOSC7	4702	6784.82	3587.53	6017.11	5401.58	5507.74	5159.61	5027.27	6054.75	5559.74	6957.77	5107.95	5067.37	4950.28	5600.21	6136.71	5620.59	5106.66	5367.7	5667.73	4562.85	5422.95	4620.93	6160.64	4723.56	3978.73	3729.58	3722.81	5024.69	6735.68	4222.23	6215.56	3704.97	5731.91	4580.9	6958.36	5142.85	5032.31	5182.51	4920.9	4646.5	5427.17	4911.7	3863.76	5502.58	7623.61	5131.03	4879.09	4746.92
EXOSC8	5289.06	5025.92	5388.96	5722.61	6253.29	6296.68	5663.82	4536.65	5584.9	6586.34	5408.05	5268.49	5874.67	6235.75	4775.97	7049.29	5771.22	4996.28	5207.26	6312.76	6160.61	5239.62	6380.23	5282.59	4623.43	5075.53	5126.42	4665.99	5196.22	7245.68	4369.34	5808.21	5113.95	4968.97	6356.12	6726.58	6601.27	4635.01	6077.73	6170.5	5284.98	6393.92	5411.83	4543.06	5759.66	6763.77	4857.16	8165.84	5066.78
EXOSC9	4461.84	5893.17	5272.9	5456.36	5473.26	5925.48	4928.38	5593.6	4840.97	5216.3	5948.9	4974.19	5703.62	5632.16	4861.62	5653.52	5830.25	4799.93	5008.4	4781.72	4145.99	4668.65	5844.68	4982.7	5154.7	3872.47	5803.93	5083.75	5747.53	4827.73	4374.33	5262.97	5053.04	5152.01	5583.14	5625.44	5136.89	4471.78	4361.98	5599.57	4913.69	4672.94	6222.07	4904.96	5189.84	6100.09	5104.27	5911.5	5602.95
EZR	7284.03	7462.63	7659.21	6368.06	7485.24	7011.52	7864.89	4618.14	8216.89	8034.18	7783.9	8180.35	8104.65	8615.62	8387.42	8118.47	7764.2	8506.09	7530.88	8368.25	7823.76	7084.98	7099.91	7736.15	7319.62	20103	8541.42	9260.83	7537.94	6596.66	9102.1	7956.73	7597.79	8942.39	6992.16	7246.07	7273.1	7625.92	7334.58	7504.99	7230.41	8320.97	6972.39	8355.83	8109.47	6166.64	7618.19	7481.17	9209.75
FABP12		932.878		2107.29						1641.65	2129					1050.1			964.693		1652.01							1007.57			792.637	1695.28	1523.94		1794.14				891.284	862.16			1195.4					3905.68
FABP5	2456.43	2084.79	3450.83		1014.37								2503.79	1287.04	2509.93		3500.54	1742.38		3992.33		1746.49			1175.03	78985.3		3756.63			945.17		4315.59			6051.74			4521.76	4536.88		714.976			2011.6	2970.28
FAF1	1068.13	797.927	754.188	738.503	1156.29	884.321	475.964	399.643	616.055	986.328			941.274	566.531	457.168	531.875	790.859	916.058	525.691	774.41	991.352	885.26	710.321	793.164	788.974	1082.67	443.594	823.451	1021.6		834.255	919.771	271.996	609.884	1030.63		1005.59	784.705	742.643	969.484		710.495	901.48	673.726	893.253		677.034	524.631	1021.98
FAF2	1847.75	1689.98	1979.43	2224.89	1636.53	1687.06	1907.73	1625.57	1750.51	1544.87	2133.65	1652.85	1741.67	1825.54	1604.18	1402.1	1917.44	1678.91	1880.5	1622.37	2097.26	1975.39	1488.4	1590.36	1839.4	2664.58	1658.96	1950.4	1822.21	1640.37	1716.6	1539.58	1873.91	1890.36	1585.98	1814.26	2037.49	1869.84	1705.31	1739.63	1495.95	1740.7	1708.76	1616.45	1545.25	1783.07	1877.69	2058.27	2069.03
FAH	1174.91	1396.36	1706.31	2618.11	1514.7	1682.53	2032.17	3101.37	2594.43	2516.3	3566.37	3465.9	2833.71	3120.51	2959.73	3167.57	3297.46	2483.25	2534.16	2330.71	917.064	2676.38	2046.07	1803.83	2217.52	3323.73	2962.51	2027.47	2024.16	2484.24	2004.42	2921.91	1644.67	1966.82	2726.94	3348.42	2272.25	1851.63	2156.76	1159.4	1765.9	2268.67	2646.14	2259.39	1905.87	3398.46	3345.3	2705.64	2280.34
FAHD1	2431	3749.44	1787.42	2737.14	3018.86	3041.66	2805.94	3562.77	3418.42	3087.77	2863.55	3168.77	3140.78	3035.68	3398.12	3434.36	3521.62	3278.94	3525.93	3066.37	3599.36	3244.91	2634.1	2537.27	3356.06	3274.51	3157.82	2625.09	2272.2	3079.22	1995.61	2947.01	2906.16	3028.65	2521.55	3701.51	3001.71	3358.26	2257.95	3534.9	2810.49	3399.1	2433.63	3221.28	3071.69	2013.71	2971.96	2980.42	3453.03
FAHD2A	818.75	826.193	475.382	972.738	518.897	971.849		711.912	972.948		510.2	720.017	748.622	562.02	507.472	674.347	367.011	947.164		540.536	1147.61	780.553	1348.13		687.134		647.845	573.511	729.639	756.05	778.739	668.338		909.705		803.276	573.79	732.593	885.439	1125.92	690.592	747.158	525.082	905.742	919.85		667.245	775.383	539.705
FAIM	750.229		1093.81		547.455	706.278	823.546		839.525	1005.3	735.949		534.28	744.813	671.667	717.549	656.352				1188.62		823.992	829.915	1002.52		498.183	578.23	678.532		366.993					751.102		611.816				276.346	725.521	635.056			931.544	1044.09	1132.18
FAM102B	2808.59	1720.12	1850.64	1611.78	2038.9	2024.53	1635.67	2283.73	2109.35	2343.96	2641.73	2323.77	1456.69	1767.75	1426.86	2018.99	1619.31	1964.6	2023.71	1903.73	1815.52	1896.32	1966.25	2947.68	2072.06	2020.58	2458.47	1757.83	1981.62	1732.72	1724.31	2305.93	1581.79	2722.7	1386.78	2014.72	2666.39	1809.79	1451.46	1882.07	1791.95	2083.3	1375.88	2252.55	1984.06	1134.39	1771.29	1451.24	1748.66
FAM120A	4709.87	4115.78	3956.9	3889.72	4826.57	3960.25	4564.99	3133.73	3906.13	3735.71	3479.58	3269.87	4154.09	3819.32	4005.56	3303.27	3993.19	4168.65	4561.71	3226.93	4080.31	3613.68	4761.63	4159.73	3586.87	2824.11	3595.78	4078.96	4084.8	2399.1	3911.7	3330.83	3822.2	3420.64	3678.06	2667.48	3454.89	4309.12	4264.86	3638.33	3610.15	3282.04	3705.96	3887.97	3998.21	2502.49	4381	1642.13	3787.87
FAM120C	692.262	486.081	635.051	407.248	467.14	496.097	411.232	855.663	440.208		576.878	725.416		303.753	408.548		396.719	537.354	782.187	769.469	998.574		628.724	485.27				399.1			736.266	397.934	605.049		658.308		795.773	438.21	458.12				504.156	510.001	388.711		684.408		461.306
FAM162A																										956.342
FAM20B	2375.42	2117.66	1811.63	2383.71	1615.93	1877.08	1625.23	2062.33	1708.88	2448.53	1996.36	2110.96	1949.01	1349.3	1729.2	1556.66	2376.36	1964.29	1759.01	2190.75	2003.39	1808.71	2330.35	1955.25	2405.78	1857.7	2250.84	1434.82	2324.68	1750.72	1842.99	1930.49	1570.25	1207.27	2108.45	1542.31	1919.01	1965.9	2081.18	1825.86	1925.14	2746.3	1699.09	1902.82	2196.42	2908.03	2018.22	1630.32	1193.71
FAM83B	1402.1	1524.89	1505.33	2031.9	1498.99	1451.8	1684.8	1170.57	1506.17	2066.86	2210.23	1646.13	1497.59	1651.9	1625.38	1701.27	1995.87	1460.79	1257.02	1956.17	1121.62	1371.3	1988.15	1314.21	2360.42	2035	1601.03	1867.62	1786.63	1566.08	1724.07	1517.56	1620.34	1686.84	1906.41		1446.75	1531.48	1079.64	1331.79	1964.93	1611.19	2236.35	1976.91	2186.8	2469.97	2057.62	1487.63	1657.13
FAM83D	1660.11	1022.79	1120.84	1236.72	1045.87	1438.51	1535.77	1559.88	1643.92	1219.15	1568.84	2001.73	1657.49	1088.47	1384.49	1325.11	1416.17	1297.37	2459.34	1120.73	1435.73	1115.24	1530.46	987.617	888.801	774.602		1624.99	2348.9	1622.67	1447.69	1441.71	1857.42	1207.88	1290.37	1584.56	1238.78	1279.99	1566.44	1676.67	2070.75	1402.88	1525.27	1969.47	988.67	1883.05	1576.85	1883.79	1506.99
FAM83H	4492.57	3815.77	3897.03	4311.8	3228.22	4682.3	3546.98	4579.61	4045.56	4280.13	4118.75	2652.23	4268.28	3694.13	3804.81	2814.36	3688.33	4100.28	4398.35	4232.48	5371.25	3341.29	4601.68	4508.62	3159.73	12612.3	3527.26	4132	4286.2	6104.43	4119.38	4318.62	4662.63	4599.72	5188.31	5272.51	4176.99	3332.24	5319.92	2482.89	3660.98	5136.17	4646.85	5841.63	4045.39	2816.04	3950.4	3732.32	4536.44
FAM91A1	3942.54	3730.05	3972.01	4398.2	3840.15	4050.25	3504.35	3665.15	4636.52	3288.48	4543.35	4149.76	4040.76	4339.52	3826.99	4688.54	4420.59	3350.79	4626.38	3790.08	3800.37	4167.67	3865.17	2937.33	5033.96	4196.72	4432.18	4106.34	4823.35	4488.42	3886.97	4183.71	3763.67	4154.57	3411.35	5036.64	3519.83	3937.77	3424.29	3854.23	4429.46	4044.8	4181.77	3797.47	3770.04	2991.41	3655.86	3207.22	4315.02
FAM98A	700.032	989.33	953.818	649.533	1200.56	849.778	902.53	572.284	501.392	681.026	552.461	349.873	330.012	1043.64	693.416	564.003	598.674	761.772	496.148	573.295	786.063	902.79	442.772	823.304	814.133	2129.29	1070.31	609.678	500.788	321.495	593.146		810.49	491.093	560.876		1089.99	1012.4	875.185	1020.99	517.792	645.769	456.329	758.902	501.28		628.949	135.383	774.399
FAM98B	713.473	171.049	418.791	390.832	681.588		550.749	332.759	389.276	530.997	337.345	409.925	352.784	208.603	551.376	275.604	744.189	576.197	349.845	376.738	548.704	606.409	768.313	512.335		353.523	455.922	445.615	388.776		834.839	242.067	294.592				681.754	524.834	791.236			515.039	349.468	375.555				515.838	228.328
FANCD2						115.387																		91.1546										156.381					80.6497
FANCI	1109.99	853.608	1092.08	889.197	993.603	1007.4	954.886	1025.78	734.695	1172.88	910.442	716.87	1141.87	1000.52	868.482	862	831.476	991.374	1205.14	743.251	711.097	893.725	899.81	820.537	745.015	466.406	712.088	1038.12	894.666	852.506	909.088	926.33	716.343	873.053	700.939		702.251	826.399	832.025	684.897	978.75	566.447	893.936	793.761	748.15	908.631	937.092	665.617	902.542
FAR1	2458.19	2519.58	2540.04	2598.35	2350.99	2542.1	2853.15	2421.56	2414.35	2534.04	2554.6	3008.36	2701.83	2296.23	2399.24	2679.33	2776.44	2421.49	2714.58	2356.09	2517.18	2578.93	2657.93	2520.34	2731.97	2095.5	2649.27	2504.6	3057.89	2994.89	2083.67	2416.76	2568.77	2678.96	2699.02	2478.25	2551.7	2215.68	2692.82	1951.89	3031.1	2916.36	2873.55	2897.28	2618.17	3480.38	2759.02	3337.5	2278.5
FAR2	692.163	617.371	845.206	756.487	1259.2	763.597	956.417	771.205	601.297	699.619		641.954	640.374	857.369	947.265	985.015	533.354	647.46	722.244	1023.43		776.009	663.646	624.337	767.104	539.72	771.889	946.06	740.894	1115.96	610.564	779.489	626.053	607.639	811.268	1303.97	725.489	1000.82	839.887	952.127	488.196	782.668	998.247	799.613	963.809		789.863	998.333	709.303
FARS2	1765.43	1463.32	2019.87	1893.12	1778.4	1896.72	1459.99	1560.37	2148.49	2152.5	1996.44	1583.18	1314.19	1880.71	1783.07	1583.04	1574.21	1678.02	1801.86	946.532	1646.04	1738.38	1325.07	1529	2215.27	1901.69	1570.97	1643.07	1501.89	2288.34	1868.9	2346.76	1596.49	2925.48	1950.36	1425.77	1705.06	1903.29	1235.56	1588.34	2606.35	2371.53	1915.31	1893.58	1895.27	1270.4	1448.69	2098.88	1435.95
FARSA	2320.87	2223.58	2261.58	2368.48	2124.45	2338.3	2224.15	2447.4	2069.18	2332.73	1685.74	2246.33	2362.86	2151.99	1956.27	1771.93	1786.57	2284.48	2152.21	2034.7	2995.23	1892.64	2417.15	2628	1690.29	1685.06	2553.27	2111.29	2059.17	1975.46	2085.97	2371.99	1820.3	2234.89	2367.91	1574.33	1533.57	2311	2520.86	2667.09	1774.73	1644.67	1803.58	2015.67	2099.82	1453.05	2345.28	1115.71	2385.37
FARSB	8631.46	7777.96	8184.22	8122.49	8108.55	7721.05	8555.16	9588.11	8176.72	7995.08	7488.75	7116.81	8333.26	7845.18	7810.6	7109.92	7833.39	7725.11	7285.05	7664.04	7036.8	7065.12	8477.67	7249.27	8208.64	6875.84	7579.81	7380.56	7329.31	4333.53	8243.4	7401.45	8175.11	7806.73	7066.54	4864.03	7126.64	7639.78	7593.24	8300.6	8207.76	8133.23	8348.8	8074	7717.72	5122.2	8121.3	4934.94	8252.13
FASN	109192	105895	109169	108649	109795	109005	106749	116679	104328	109091	103827	101966	101405	103589	107217	104434	112201	100753	104072	102045	108019	104160	112021	112221	101349	73434.4	99045.4	106188	101402	89262.8	96765.1	103843	106314	108678	108093	87436.3	103383	107026	113995	116158	108940	107619	103613	100361	100156	94664.3	101312	86692.1	105152
FAU	19216.3	7975.77	11097.2	9529.27	9379.29	10629.1	15278.1	13856.5	15738.6	10517.5	11498.9	8443.02	12015.7	7575.47	11844.5	11623.8	12154.9	9708.54	15741.3	10394.4	16838.8	5585.63	16174.3	8662.41	14005.4	13016.5	15653.7	12527.8	13644.3	14334.5	16072.5	11097.2	11906.1	14108.1	10328.6	5968.96	11224.3	9139.3	11248.8	8566.18	12765.3	10848.5	18386.4	14409.8	15281.1	11026.9	15047.3	10902.1	13682.2
FBL	3491.53	2822	3476.44	3443.39	2851.87	4605.69	2897.01	2043.39	3674.58	2891.97	3290.54	2797.27	3718.28	2215.83		3384.9	3411.58	3067.55	3656.92	2851.59	3362.04	3468.21	2934.37	2278.13	3758.62	6447.37	2946.33	2906.3	3276.46	3053.79	3269.63	2158.21	2722.12	2698.67	3936.42	2590.96	4167.39	2241.87	4040.6	2278.1	2161.64	2431.67	3785.85	3047.75	3546	2380.31	3017.26	2648.88	1602.63
FBLL1	5928.64			5655.69	4632.72	4742.95	4337.36	4456.83	5212.96		6252.48	4460.63	6720.38	5501.93	4379.65		5460.63		5936.65	4954.13		3951.86	6216.48	4722.44	6587.52	15665.4	6430.08	4947.22	6942.2	5276.5	5950.59		5114.21	4912.16		4953.53	6683.76	5071.78	4430.07	4293.79					5236.71	6023.32	6760.89	4620.39	4669.9
FBP1	14303.5	15027.5	12565.7	15097	13122.4	16262.6	11992.3	19222.7	18447.2	23002.1	20430.1	23158.4	18694.7	21662.9	18467.8	20919.9	20218.1	22892.4	18515.5	22754.2	18145.1	23163.1	16873.7	22135.9	16655.8	12641.6	14278.2	19609.1	19101.4	22513.3	15363.9	22104.1	18547.4	22640.1	19678.8	21367.9	18723.3	17730.7	18164.9	18294.8	19454.9	19877.4	19520.7	16543.1	16627.8	20356.6	18643.2	20341.8	19295.6
FBP2	15162.8	13580	14652.2	17788.6	15684.8	16456.6	12140	18394	20646.2	23869.9	20922.9	26439.1	24940.3	22548.9	20613.3	22767.9	20337.1	18148.2	20830.9	19563.7	19413.3	21096.2	19262.5	23752.3	21727.7	14072.4	15262	22646.8	20847.7	23525.1	18925.5	23428.6	20036.5	23690	24440.3	20938.9	22277.8	16920	20251.8	20234.9	22091.6	20184.1	23560.4	20869.8	19723.2	24440.1	20281	22793.7	21280
FBXL12				357.417	1369	1599.51	541.311	1192.41	365.629	421.011	785.489	504.206	1564.05	1598.24			362.067	761.842		367.406	613.209	443.599	374.627	2088.95	587.025				431.821	914.705			796.081	1087.24	1196.93				1694.66		719.836	983.82		1221.83		590.826	1013.14	255.167	539.774
FBXO22	7690.38	7557.85	7123.04	6801.24	6369.33	6116.73	6728	5819.2	6721.11	6020.35	7122.01	7045.95	5793.19	5990.44	6727.74	7089.51	7218.63	7210.92	6840.25	6423.44	4884.87	6744.88	6667.12	6407.07	6953.63	5475.06	5961.59	5877.31	6597.16	7310.23	5546.36	7349.68	6752.55	7235.22	7118.35	7075.97	6029.8	6408.58	6743.42	6448.04	7021.79	7611.02	6550.23	6059.91	6193.52	6761.96	6317.39	6698.65	6416.54
FBXO7	1085.5	671.585	767.376		917.227	573.449	606.17	1083.68	446.785	210.225	749.847			561.48	479.811		540.555	708.909	277.691			423.185	1336.84	783.062	710.999			727.963	1045.16		962.324						460.866		777.443	731.523	758.291	321.265	673.713	540.961	713.585		727.321		1057.02
FBXO9		444.669			281.957	252.171	459.808	394.159			376.195		352.452	410.695	520.371	412.256	538.573	243.295				737.982	502.497					763.943	548.513		527.151		559.203	702.23	947.022		451.456	328.576			618.536	323.854	464.922	523.953	364.38		598.539	562.573	483.48
FBXW9	1546.75	1798.02	1554.6	1430.36	1869.73	1546.87	1698.74	1146.7	1173.97	1534.1	1800.19	1121.17	1338.02	1393.53	1473.99	2080.04	1373.21	1274.34	2405.78	1498.64	1174.09	1423.52	1097.18	2070.52	1741.74	1788.69	1288.79	1454.84	2005.76	1536.97	828.495	1672.06	2117.16	2342.7	1357.4	1343.8	1695.09	1393.95	1415.61	1812.16	1700.5	1283.73	1537.63	1489.42	1819.78	1875.02	1252.37	1632.54	1732.76
FCHSD1	912.146				203.185																					4634.55										921.872
FDPS	4858.21	4404.2	4366.63	3966.71	5300.17	4581	3523.57	3653.6	4734.13	4057.99	3541.2	4296.83	5056.19	4904.65	4373.33	4472.29	5725.03	4328.28	3747.99	4365.67	4810.55	5454.51	4972.37	4304.05	4523.11	9416.94	4470.73	3922.38	5024.4	1343.83	3841.64	3091.42	4265.45	3579.31	4783.55	2941.87	4508.47	3718.98	4787.3	3581.97	3512.13	3768.91	4176.05	3704.83	5025.32	2837.12	5101.98	2162.65	4714.67
FDXR	3272.94	3268.62	3089.14	2911.67	3077.01	2452.56	3138.08	3591.52	3168.77	3282.31	2746.92	2160.89	2972.8	2959.3	2998.79	2909.61	2722.78	3225.84	3156.37	2766.05	3652.75	2839.3	4531.59	1798.93	3080.41	4487	2588.64	2706.13	2435.71	2064.18	2804.29	3472.29	2656.9	2484.6	2706.64	2842.78	2624.72	3144.29	3273.36	2850.26	3104.59	2295.17	2864.29	3058.1	3182.66		3212.37		3115.77
FECH	3812.06	4665.77	3247.2	4690.9	4365.47	5382.44	3736.99	5415.18	4709.06	4712.47	4540.95	4509.58	4026.67	4534.11	4433.03	4850	4475.9	4606.64	4937.51	4383.03	5112	4367.02	4882.85	5169.93	3747.46	3240.03	3885.94	4688.24	4008.47	4457.86	3795.88	4273.44	4031.33	4935.9	4869.56	5042.35	3741.77	4696.63	4506.23	4544.91	4273.25	4251.35	4282.9	4252.36	4703.4	3970.81	4710.61	4031.15	4783.43
FEM1B		466.343	405.019			486.494		671.674		537.62	476.809			392.589				520.653					662.938	495.035			436.962			570.338				832.266							679.592	707.007	562.518	573.953			206.623
FEN1	1298.23	1444.21	982.089	1817.38	1469.31	1651.23	1827.67	2092.8	1525.95	745.33	1943.28	1758.59	2098.86	1617.24	1468.63	1299.18	1176.42	1662.48	1581	1434.78	1708.55	1490.22	1901.97	1534.66	1601.48	1528.53	1846.94	1866.07	3037.16	1472.36	1987.66	1107.11	2502.8	1043.59	1776.15	975.898	1794.13	1625.07	2356	1614.67	1896.81	1942.98	1195.61	1396.59	2033.41	1373.27	1530.5	1435.2	1576.27
FERMT1	1083.49	1169.48	1447.09	1461.46	1198.52	1513.63	1327.7	1428.08	1464.85	1229.37	1255.15	591.83	1173.61	1499.03	1452.85	1749.66	1443.86	1675.25	845.584	1078.18	1287.87	1095.18	1330.79	825.553	1483.7	3954.79	1053.13	760.242	1134.18	1125.83		1334.22	1304.02	1534.61	1194.93	1161.01	1362.76	891.714	1847.88	1434.19	1712.53	1458.75	1265.67	794.69	1528.37	1080.98	1003.73	1115.06
FERMT2	875.531	844.701	1182.51	947.213	1226.05	1018.58	1152.48	1095.42	1147.43	1082.14	965.139	1156.9	1011.01	990.359	790.998	1280.74	1302.57	1158.68	971.796	863.123	778.857	1141.78	1479.09	962.097	1412.73	1167.98	1110.59	1140.17	861.577	1097.38	831.072	803.704	1407.38	967.767	1597	719.27	1302.5	910.058	953.506	1015.79	872.115	947.691	1376.77	1127.97	1264.24	950.144	1204.95		734.932
FGA									963.589									133.39								11985.1										720.05
FGB		1120.5	1165.64	1706.29		1382.4		1711.94		1001.04	854.014	1528.05	1088.73	1210.36		1567.36		1100.44	1014.63	1212.48	1421.71	1391.82		797.843	1225.77	14838.1	1210.71	744.516	1202.39	1228.99	730.595		1062.12		1242.59	3236.71	1483.79	1025.67	1033.06	1884.36	1324.54		1025.91	1103.43	1575.25	2073.6	1504.14	1185.9
FGD5								727.045				269.877	309.372	824.488		1154.91		663.029		729.602			641.446						647.435		463.865					1173.17			614.162	445.517					771.46		434.322		502.101
FGG								1907.22		607.546								1049.42								15116.4				542.37			1159.08		1793.72	1710.49	569.479		981.234			679.851						1741.33	297.337
FH	4526.52	5120.68	5008.1	4999.28	5192.47	5202.83	4559.35	5145.31	4226.6	5094.35	4529.53	4089.78	4188.9	4751.23	4496.99	3664.43	4430.69	5084.48	4560.49	5408.72	4071.62	4741.96	4445.78	5373.59	3856.51	5664.08	5213.82	4732.96	4446.02	2108.95	5207.29	4550.13	5110.02	4810.52	3667.97	2616.17	4547.31	5647.52	4131.39	4969.22	4711.29	3938.88	4557.23	5628.61	5415.43	1992.71	5331.48	1960.35	5458.13
FHAD1	70657.9	25205.8	59703.4	66408.7	84758.5	30897	65483.1	33868.8	54154	54758.3	67547	41979.4	45990.7	37057.4	36603.5	41955.4	38245.4	33980.9	62237	25091.9	61311	31112.3	32668	32635.4	43848.2	41505.9	34283.9	34733.2	45100.7	61912.9	21877.2	40190.4	43452	64257.4	54873.7			22140.5	48346.6	55636.2	35250.1		53388.5	31521.7		44983		53252.5	32925.3
FIBP	1029.23	736.686	1109.25	1195.18	1055.65	1101.53	1318.97	456.617	1103.01	1049.28	1131.87	1049.48	1007.86	1415.21	737.969	1007.47		1009.33	1285.31	671.515	1012.55	816.467	1075.24	745.95	597.657		1388.17	821.217	1481.03	513.535	1069.24	698.847	768.391	770.416	808.028		1202.31	984.358	892.613	956.677	948.956	1248.64	690.865	1482.5	939.46		1321.15		1067.72
FKBP10	1070.21	1159.37	2080.57	975.202	1088.08	1643.21	931.074	1271.05	1036.34	1240.7	1201.6	1034.64	1838.12	975.429	893.957	1865.39	1381.15	1807.07	1668.18	905.388	789.508	1669.35	1753.71	1780.82	1392.91		1052.99	879.116	1568.29		2520.93	1414.49	1758.52	1402.45	1372.17		1482.02	1321.66	619.193	998.373	1266.83	1207.93	1141.94	1203.8	1398.1	1165.28	1142.21		1481.12
FKBP15	1051.2	1026.9	793.075	1194.49	1112.92	987.902	923.029	837.008	1237.01	992.972	1068.16	765.726	972.603	838.797	963.315	907.239	1064.44	1120.56	909.079	799.678	832.866	1207.31	1344.08	825.164	1018.95	1388.05	968.371	981.849	1308.98	819.426	889.847	943.46	1036.85	1048.03	795.199	1114.73	906.789	985.968	1401.99	1080.69	771.217	1080.3	685.561	839.816	1021.29	765.721	901.186		1247.5
FKBP1A			761.647		821.721				419.81								240.77	541.08			493.802					9022.41			1294.09		969.547	541.151			1358.89	1905.92								709.988
FKBP2	2697.64	1673.47	3550.51	1923.44	2921.1	1390.13	2905.26		1944.52	2232.42	2050.63	1320.51	1425.1	2053	1093.97	2375.05	1460.36	1990.87	930.486	1641.74	2713.59	1776.46	1988.36	2082.63	2421.91	2588.09	1866.35	1264.66	2187.98	1293.47	2015.6	2117.63	1392.92	1386.33	1878.78	1509.72	4175.7	1306.03	2600.51	2123.63	1650.79	1829.6	1627.13	1283.89	1683.67	1892.56	1852.71	1176.78	1472.77
FKBP4	4370.42	3380.47	4677.63	3530.87	4216.27	4193.35	6404.43	3176.68	4883.28	4875.03	4151.94	3998.36	4541.43	4297.96	4576.2	3828.18	4247.2	5037.21	4346.8	4938.75	3933.39	4241.02	5298.06	5229.93	4891.55	4431.88	4355.09	5042.62	5160.95	2439.02	7692.43	4016.32	4729.59	4359.54	3090.7	1483.58	4123.16	4752	4961.82	5795.86	4182.65	4237.42	3329.08	5177.98	4541.8	1916.38	4779.96	2298.32	4579.12
FKBP9	1266.37	1104.23	614.755	919.417	871.825	1146.04		1018.79	826.98					934.932	1036.4	713.326	809.466	1317.37	1280.95	806.486	558.079	809.396	1491.87	686.056	1076.15	1657.84	1058.4		910.917		783.457	1320.39	1061.47	617.821	911.136		1344.6	1239.06	1471.26	1139.63	981.345	1583.72	792.405	746.611
FLAD1	1381.12	1494.5	1426.44	1532.38	1503.11	1422.75	1380.42	1311.43	1234.25	1640.54	1335.58	1480.98	1655.79	1241.94	1379.85	1162.58	1449.85	1350.9	1429.14	971.336	1361.85	1423.76	1593.53	1389.5	1284.28	1349.69	1441.85	1112.6	1079.32	1384.42	1205.47	1122.03	1414.26	1242.86	1052.77	1071.01	1189.61	1252.5	1801.64	1213.91	1257.77	1137.77	1364.34	1122.53	1465.83	1166.07	1100.5	1419.96	1767.48
FLG				745.118	643.819					160.203	864.691				377.296		1482.2	1471.81		907.884	723.556					37942.2										11308.9									1702.23
FLG2	859.11	857.727		563.447	227.187	518.262	337.2								1092.28	543.905	585.324			694.679	2159.54		3901.8	542.851		12562.4					406.668	285.701		746.743	1798.69	1792.47			1208.15		229.546	206.302			9172.91	718.473	345.221		395.667
FLII	4226.25	4121.95	3916.16	3690.23	4312.27	4300.72	4103.36	4496.83	3621.25	3519.67	4591.22	3785.45	4317.92	4390.22	3960.96	4020.32	4142.82	3870.31	4215.91	3755.15	4731.16	3977.39	4522.37	4416.57	3798.01	4497.07	4499.9	3784.25	4009.79	1856.16	4430.03	4122.54	3801.53	4125.17	3802.82	3066.43	3916.63	4380.98	4277.94	3718.19	4372.82	3866.39	4608.17	4073.4	3812.79	3033.75	4319.56	2324.31	4222.82
FLNA	7480.44	7348.21	7887.8	6394.2	7025.52	7492.04	7457.71	10988.4	6624.79	6791.26	6344.58	5969.03	7162.7	6672.24	6668.07	6316.8	6741.92	7490.49	7180.39	7267.4	7271.44	7341.36	6853.09	7455.69	6748.99	16945.8	6993.17	7372.72	7124.97	2355.38	8835.74	7300.34	7607.08	6907.19	7175.32	4124.63	7848.44	8051.68	7498.37	6871.2	6520.75	6903.29	6573.48	7252.51	7086.56	3736.25	6910.13	3091.17	7127.12
FLNB	6280.74	6841.67	6348.19	5639.83	6815.07	6928.16	6793.92	8229.83	6702.73	7485.73	5933.15	6381.62	6861.47	7064.25	7008.2	6123.21	6767.55	8233.86	6539.43	7987.26	7348.01	7688.38	6457.99	7898.38	6565.56	11075.4	6699.01	7158.19	6854.15	3271.71	7610.49	6281.17	6483.39	7223.33	6317.03	4854.21	7200.53	8578.35	7020.35	7249.41	6608.49	6600.61	6181	6472.59	6856.84	3466.19	7624.88	2338.86	7540.66
FLNC		4486.1			5037.84			4335.84				3603.08					2187.27					4406.05		3458.29							3471.71				2484.98		4309.55		3406.55	3251.1	4181.29			1793.91	1790.52			1049.27
FLOT1	4414.16	5051.1	4557.66	5167.58	4887.04	4932.51	4608.3	5169.96	4192.79	4473.2	4355.44	4489.99	4698.4	5088.52	4875.61	5000.99	5232.86	4755.28	5044.42	5430	4735.8	5009.03	4261.38	4837.8	4465.08	3615.69	4260.8	4543.13	4311.35	5626.26	4335.48	4498.93	4147	4743.62	5248.22	5652.67	5445.7	4966.45	4518.27	4779.64	4230.95	4012.95	4443.08	3979.69	4852.69	4581.15	4714.97	4830.29	4474.52
FLOT2	4025.82	5081.34	4251.1	4813.15	4755.44	4963.08	4180.27	4422.44	5039.09	4905.88	4963.95	4955.67	4380.65	4878.29	4816.07	5021.92	4871.44	4620.93	4660.8	5003.53	4154.64	5049.86	4717.75	5498.38	4587.45	5286.17	4537.59	4919.6	4744.93	4610.13	4189.58	4851.73	4921.06	5322.98	5944.91	4946.08	5238.15	4837.03	4366.03	4924.27	5489.9	4823.59	4482.08	4547.2	5656.67	5298.18	5056.81	5289.99	4993.76
FN1	1003.89	502.852	910.281	736.934	975.471	988.728	990.909	946.262	768.985	698.355	1240.89		430.248		892.084		529.323	758.551	1163.15	992.245	908.081	559.612	733.535	1160.25		6460.1	1328.78	819.621	984.596	1708.53		908.239	916.516	874.27	1476.87	1597.42	1040.05	621.542		717.873	658.685	1241.69	592.505	483.441	1194.7	1269.44	814.202	1350.97	789.822
FN3KRP	450.064	308.049	411.579	431.395	485.718	824.742	489.026	597.729	561.63	657.987	739.235	252.93	398.901		348.715	377.133	466.689	419.875	319.777		332.217	170.704	405.274	277.449		576.032	256.29	489.428	418.698		354.961	379.921	205.163	369.206	553.379		269.53	486.035	773.558	303.32	465.573		327.928	420.497	350.823		369.446	252.028	575.341
FNTA	743.896	625.717	481.445	1036.28	941.34		603.481	811.087			644.333		814.886	734.234	476.713	590.794		466.785	818.965			736.809			703.213	1701.2	1042.75	587.945	321.8		596.323	370.428	670.802	774.756	819.173			811.749			555.128		710.819	998.438			703.638
FOXK1	255.364		171.159		120.268				307.536	366.656	380.541				229.127		164.805			327.793			182.862				307.655	187.157	84.2562											484.779		342.043		104.491	192.122		43.4237		274.046
FREM2	5961.22	6534.36	7114.65	8104.85	6125.8	7770.53	6362.64	7277.84	4504.13	6000.1	5640.39	5586.45	4757.73	4903.96	5788.25	5756.58	6493.4	5939.14	6624.99	5996.83	7836.29	6305.42	7767.67	6168.3	6123.3	5715.4	6118.58	8031.69	6675.96	6039.35	9079.87	7064.89	6065.06	9933.66	6509.48	7371.6	6466.18	8877.58	7289.47	7880.59	6763.58	6427.84	7943.88	7550.58	6166.84	7980.28	5998.7	7348.09	6121.86
FRG1	4487.6	5750.33	3680.54	5888.08	4132.74	5150.6	4424.14	4473.65	4375.09	4932.42	5852.32	7332.68	5859.4	5032.83	4972.68	6308.02	4178.47	4591.9	5388.38	7085.82	5204.38	4827.67	4665.66	4015.4	4289.84	2938.97	5037.61	4746.53	4553.51	5984.59	3351.4	5100.59	5878.04	5676.97	6385.21	7573.29	4849.3	5018.78	4281.64	3993.25	5455.17	4957.48	5744.98	5596.02	6128.86	7598.92	4727.44	9353.64	4655.93
FRMD8		585.122		452.468	394.36									88.7364												509.776						396.126					276.021			130.67		634.646	379.005		300.795
FRYL			647.056	574.458	619.554		643.512		427.505	336.132					375.29			78.1712				687.023	382.53			806.747			625.673			396.299	479.999	529.714			367.521	755.633			446.837	396.774	579.828	251.968	705.059
FSCN1	4392.98	5474.58	4504.55	6482.71	5519.12	5737.93	4053.35	4449.68	6484.6	6932.3	6065.65	7336.6	6666.3	6612.96	5927.61	7281.07	6563.89	5221.18	6233.06	6301.37	4627.75	6291.92	6059.87	6641.64	6869.57	11578.2	5994.79	6011.99	6199.05	6778.13	4912.54	6143.12	5863.1	6394.35	7320.23	8576.97	5523.65	4967.93	5664.79	5539.62	6750.75	6595.18	6987.43	5382.3	6232.45	7799.18	6085.14	7475.39	5435.24
FSD1			731.147	314.16	705.985	255.056	458.957	417.427	645.958		213.153		439.424	576.745	592.31			503.957	532.586	442.918	754.364	308.189	683.619	189.427	551.626	560.242	570.414	526.166	500.091		283.625	253.431		405.375	597.025		515.272	346.842	390.954	415.386		231.201			368.697		283.452	931.743	413.993
FTH1	456.989				652.03						678.718	191.021		470.112	786.316		397.491	379.6	376.147				632.912	520.243	641.198	1244	322.763	188.127	735.801		485.052	694.881	202.499			634.811	501.472	347.708						274.676			524.508		266.505
FTO	2027.31	2225.82	1506.34	2399.91	2005.44	2414.41	1438.02	2332.1	1503.86	1948.53	2276.13	2271.78	1866.54	2250.32	1786.25	2234.03	1963.01	2401.47	2578.53	1885.17	2021.72	2377.23	2228.84	2331.63	2308.51	1354.05	1932.01	2269.82	1846.87	2136.99	2076.43	1948	1799.85	2701.46	2424.61	1699.56	2815.76	2327.68	1478.93	2074.97	1981.34	2419.94	1837.79	2612.48	1916.51	2017.61	2576.79	1837.34	2281.3
FUBP1	2097.04	1575.84	1521.48	1814.89	3085.68	1258.88	2230.89	933.302	1869.58	2004.67	2130.4	2388.39	2969.22	2321.56	2229.33	2306.56	2338.24	2488.38	3076.52	2885.42	2703.42	2458.49	2516.33	2347.78	2813.86	4943.44	2059.41	2639.6	3645.98	884.104	3570.76	2125.92	3077.08	2539.27	1981.92	2595.12	3094.6	1947.49	3122.11	2464.63	1612.33	2053.34	1342.52	2948.53	2286.28	1701.07	2182.96	938.643	2075.06
FUBP3	998.828	1019.64	1446.01	1503.36	779.665	871.029	1008.13	779.904	1149.93	1103.28	796.567	1313.45	1280.67	1244.65	1462.09	965.717	784.952	1221.21	1130.26	1461.54	1473.63	1189.42	1481.18	2076.02	848.598	1522.58	1327.6	1239.02	1159.13		1374.42	968.418	1677.59	733.625	532.542		1732.34	1243.2		1355.49	648.272	775.249	1041.51	820.676	948.109		1172.41		1336.19
FUCA1	501.418	645.395	593.656	632.37	362.951	904.939	718.846		971.176	1074.92	656.619	1011.74	859.812	934.056	412.589	624.829	831.853	773.017	665.705	833.776	427.691	529.276	829.195	632.271	734.468			861.939	525.022		842.583	1156.14	435.428	894.906		7114.36	949.441	825.92	712.092	327.285	374.244	689.058	622.928	777.602	1245.85	1163.09	1105.29		796.994
FUT8	984.202	1125.26	1893.62	1190.07	1029.94	1395.17	1955.78	1120.08	780.554	1037.86	1272.9	620.584	1227.34	1521.01	1241.94	934.288	915.881	1028.27	1409.14	1439.64	1274.54	1249.75	1640.42	1433.26	1160.87	1633.18	1956.9	1589.54	1142.7		1651.03	857.853	1153.3	1199.53	1083.07	1168.08	1536.62	1210.18	1124.98	1368.48	1226.85	1039.18	1499.04	1371.3	1078.7	858.988	1395.99		1498.05
FXR1	5843.1	5512.47	4470.77	5147.95	5239.67	5269.65	5110.98	5049.98	5551.86	5451.23	5323.68	4863.01	6663.47	5240.27	5393.73	5783.43	4976.79	5792.24	4711.49	5343.8	5360.69	4194.52	6138.35	4794.66	5078.56	3622.22	5427.45	6091.04	4931.43	5534.54	5661.47	5093.12	4844.16	5744.51	4456.57	4358.34	5480.79	5653.95	5706.15	5203.08	4678.39	4857.52	5461.92	5572.89	5875.15	5064.04	6243.53	5222.26	5478.79
FXR2	1444.2	1407.6	1392.57	1602.17	1689.41	1555.73	1635.2	1280.53	1314.51	1459.49	1592.5	1657.2	1896.43	1483.7	1654.15	1730.46	1566.02	1597.64	1375.51	1608.97	1762.24	1669.67	1765.13	1735.57	1708.99	1374.15	1516.29	1566.66	2007.81	788.764	1838.32	1747.05	1651.11	1632.42	1614.34	1292.82	1731.33	1707.23	1508.38	1478.41	1638.39	1429.45	1271.12	1783.2	2054.94	1537.81	1691.86	1073.85	1818.86
G3BP1	12528.4	6802.79	12828.8	6141.77	10083.7	7567.85	11765.2	6631.28	8099.5	6733.7	7296.97	5436.27	6997.15	6958.32	7445.37	5333.03	8078.7	8475.5	8279.62	8420.38	9189.43	6914.75	8785.39	7308.1	9297.93	6918.35	10418.5	7321.57	10843.7	1327.65	11895.9	5916.7	11739.4	8144.02	12328.6	3782.96	11215.1	9055.12	14667.5	7647.54	7496.63	7027.93	8105.88	8608.81	7393	2683.65	8768.26	2951.97	8817.21
G3BP2	4354.93	2706.7	4364.97	2365.88	3567.46	2041.17	4144.16	2080.36	1829.3	2479.61	1932.69	2080.53	1621.06	1569.67	1984.27	1605.07	2283.5	2157.75	2302.42	2226.79	2256.95	1641.35	2914.66	1865.68	2815.13	1643.19	3328.64	2233.15	3159.06		3566.74	1724.31	3831.51	2702.72	3648.17	2422.76	3578.76	2531.08	5092.15	2594.33	1937.34	2033.58	2618.71	2575.96	1935.7	1034.82	2105.95	1870.57	2549.92
G6PD	91616.4	93238.9	90568.9	96044.9	90464.5	90759.3	85995.5	110171	90043.6	86920.7	89568.1	90419.2	89361.9	92963.8	91305.5	94977.1	93059.2	91859.3	87582.9	87883.1	85304.5	94895.8	93344.3	93456.1	83912.5	64164.8	92125.2	90639.8	89450.8	67136.3	87839.7	90777.8	92007.8	91106.8	88969.9	71318	90307.2	94781.6	96728.4	94632.9	92789.6	91428.9	89931.1	90032.8	88096.3	77433.6	86085.6	69192.8	90580.2
GAA	773.521	822.05	740.8	656.556	1126.06	830.462	887.527	604.751	598.861	785.397	769.051	748.077	629.614	782.185	756.445	912.036	705.834	715.525	835.662	808.444	960.299	711.445	836.727	772.509	1043.67	1022.39	754.029	847.239	670.93	735.001	862.909	956.977	773.96	877.407	735.206	4463.3	946.45	627.683	576.993	565.303	338.933	620.05	768.24	630.306	706.341	398.781	670.928	764.766	912.275
GABBR1		1164.54			610.064			1146.48			596.925			769.457	1040.43		1220.17			1215.49	2720.84			1081.63							865.612		1061.15					1353.73	1505.75
GABPA	1564.55		1260.2	1270.14		873.991	1068.95		759.405	948.011	1551.29	846.549	841.249		848.428	981.414	1439.28	1176.73	1215.56			1526.53	958.737	1482.47	774.68		809.214	1436.22			947.814		695.17		1015.3		1134.6	1245.11					411.045	1160.09	913.93		799.98		827.775
GAK	2836.88	2707.68	2759.36	2127.23	2871	2802.75	2987.01	2280.31	2697.53	2549.24	3139.43	2578.14	2280.9	2309.9	2383.36	2259.03	2295.02	2495.43	2521.06	2783.67	2257.16	2629.3	2616.38	2857.45	2175.42	2944.81	2258.9	2683.73	2210.68	1739.38	2730.58	2105.65	2498.54	2600.41	2681.84	902.518	3305.46	2710.01	2676.8	2559.63	2609.45	2047.24	2453.25	2679.06	2510.03	1412.47	2296.15	1802.84	2465.36
GALE	801.918	246.399	792.538	556.533		513.734	279.106	621.75	955.537	1256.28	794.297		338.394	256.362	833.611	374.39		841.34	735.266	560.584			281.997		490.265	389.867	634.447	384.199	831.466		345.182	1253.8	454.815	757.446	587.188		610.117	485.895	362.072		530.49	561.475	468.649	538.631	704.134	480.359			815.772
GALK1	2893.58	2235.71	2963.49	2707.46	2925.43	2673.64	2967.3	3536.11	3130.89	2661.99	2742.09	2544.67	4036.65	3031.1	2679.36	3174.66	2563.82	3339.36	3752.4	2081.91	3005.53	2631.82	3552.77	2534.75	2835.98	2840.29	3056.74	3623.08	2938.27	2110.81	3158.74	3171.41	3448.63	3353.95	2839.51	2815.5	2692.69	3148.44	2903.75	2729.15	3293.76	2905.61	3664.29	3955.24	3200.77	2312.16	3789.64	2043.84	3231.78
GALK2	893.719	865.267	746.977	741.986	1481.73	1061.24	901.149	871.868	596.259	591.148	554.154	973.738	945.36	590.079	757.273	996.138	710.135	638.065	850.484	354.29	933.161	745.869	562.815	523.029	433.447	707.576	430.228	632.945	921.932		1037.89	316.162	781.058	702.888	883.862		682.374	851.793	526.67	715.216	688.856	712.712	466.287	1080.88			540.696		991.949
GALNS	831.381	750.057	711.833	730.724		924.728	603.863		969.268	926.563	903.127		594.374	619.237	573.073		762.504	895.203			750.913	1077	764.23	477.092				1108.63							1035.49	2632.15	981.117	814.521		840.187	1009.31	820.328			896.344	737.753	763.105		800.729
GALNT3	522.209	795.244	995.982	759.673	721.359	718.451	646.454	1117.39	641.169	806.553	760.061	800.57	327.035	1091.08	743.96	790.952	698.976	693.103		608.372	667.45	1172.92	753.094	865.109	896.887		1411.64	795.444	885.016	361.682	585.82	830.113	857.734	569.221	832.264	854.72	841.17	651.592	641.492	636.131	953.541	635.83	1091.03	797.059	789.946		594.808	360.437	676.301
GALNT6	1128.73	1014.96	1082.95	1230.89	901.114	1466.96	1216.68	1445.53	1189.32	1391.55	982.553	1579.12	1231.3	1571.5	1200.03	1245.94	1529.09	1213.67	1812.69	1225.22	1177.84	1468.8	1456.85	1271.99	1065.94	1110.71	1492.21	1390.72	1205.13	942.96	1408.24	1410.33	845.646	1604.86	1344.98	1268.43	1522.26	1248.96	1068.55	844.16	1160.83	1145.7	1334.19	901.628	1433.47	1859.49	1202.11	1163.68	1284.01
GALNT7	1218.27	1001.71	1029.48	1564.98	934.068	1327.94	1043.56	1197.01	1504.58	1539.87	1055.86	1300.79	1146.73	1055.44	1380.47	1983.71	912.69	1181.71	1129.26	784.316	1385.4	1466.22	1195.75	1061.45	1542.05	1066.61	1037.78	1314.37	1172.38	968.669	1184.06	1696.99	1323.44	1204.66	1343.49	1990.41	1462.85	887.419	1230.6	944.869	1094.08	1317.35	1067.48	1057.56	1193.72	1436.38	1209.56	1476.87	1096.44
GAMT	576.114	548.21	780.402	557.937	809.936			581.553	497.955		458.305		530.337			248.59	512.05		955.066	313.954		274.022	613.776		555.725		654.463		494.683		531.309							450.531		530.993	615.066	484.055	283.797	263.431	328.722		553.283
GAN	976.013	1270.48	1417.07			1433.18	1805.99		1309.89	1292.44	1650.45	1792.84	1854.27	1354.55	1034.54		1479.68		1568.62	898.195			1322.77	964.987	1727.27	3563.16	1470.22	1262.88	1285.1	1530.12	1522.93	1417.42	1072.01	1185.89	1152.99			1370.58	1694.48	1853.15	1619.22	1196.43	1714.15	1841.04	1585.49		1586.32	1206.28	1542.19
GANAB	16919.1	21059.8	13381.1	18169.7	15887.4	20131.3	12756.2	19308.5	18734.2	20000.5	19720.5	19457.9	20276.1	21063.6	21428.2	21580.1	21743.3	21508.8	19554.2	20456.7	18887.2	21689.5	20786	22383.4	16946.5	15544.1	16588.7	19412.9	16620	13947	17964.7	17752.3	17232.4	18860.4	16014	14890.8	18131.8	18920.8	18881.5	20436	18293	17855.3	16968.1	16585	16978.2	14961	16740.3	13623	18932.9
GAPDH	643084	830574	553668	656994	627190	872576	523370	741354	919168	1003480	948087	992205	904729	1001790	914084	1105690	916222	1032040	739682	1074360	880094	963338	941898	1144830	834407	1096840	701145	967444	842965	1074030	705501	1048650	858725	1107900	884993	1447240	856959	940618	879304	1061240	947625	937850	925748	801996	912716	994291	833818	994862	993265
GAPVD1	1828.22	1017.77	1578.63	1631.1	1029.79	1640.24	1725.77	1682.84	1627.34	1791.88	1597.49		1644.96	1657.08	1683.38	1324.44	1460.97	1666.03	1776.73	1518.62	1666.39	1479.91	1528.75	1962.23	1360.92	1878.42	2266.16	1718.91	1423.99		1686.17	1596	1795.29	1274.97	1291.91		1682.67	1775.76	1558.85	1430.35	1078.76	1470.43	895.434	1340.48	1611.39	1048.02	2217.38		1750.66
GARS1	6096.31	8401.07	5062.16	8025.16	7339.66	7666.27	5653.77	8576.39	9427.93	8601.77	9133.46	8906.85	8435.67	9245.4	8489.2	9668.31	9215.25	8871.75	7280.27	9964.18	7177.55	10188.2	8112.57	8655.03	7835.24	9919.78	6734.35	8857.82	7893.79	8483.22	6369.42	8544.99	7341.29	9129.8	8311.21	8442.53	8048.34	8477.79	7832.36	9812.94	8494.56	8613.17	7942.48	8372.5	8761.76	8617.85	6944.36	9156.51	8525.84
GART	14383.4	13910.1	14706.2	13587.1	14039.3	13808.7	13448.3	14694.7	13557.8	13750.2	14475.4	13633	14501.1	14157.4	14500.1	14716.7	13878.1	14324.8	14959	13957.4	13115.7	14598.2	14476.6	14368.3	14952.9	12655	15576.8	14783.6	15106.5	13004.4	13720.6	14669.5	15301.1	15908.4	15487	14796.1	14787.8	15148	14234.3	15012.8	14713.2	15332.9	15751.3	14465.6	14113.5	15606.5	14731.6	13837.9	15433
GATD1		928.69	615.045	668.489		960.806		1034.54		798.388				877.384	740.609	355.792		939.341	623.298	1116.5		1310.47	790.483	654.799	996.427	989.164	644.078	706.219	843.016	335.997	670.86		751.035	1064.33	976.659		1126.59	1005.05	361.47	842.337		1149.17	800.517	402.171	809.573		710.319
GBA1	90.7131		467.634			518.234	295.976		654.75		556.686	638.575		604.315	667.933	205.802	379.317	469.56		530.814	359.32	670.302	669.131	532.527	194.617	4884.14					420.474	385.663	524.204	240.74	425.167	1743.86								478.481	935.217		361.835		625.806
GBE1	726.847	1556.43	1287.18	1115.76	1430.22	966.914	1813.82	1240.14	946.468	1352.31	922.633	491.935	1976.74	880.149	1021.6	1148.38	1231.29	1170.22	680.165	511.214	1556.44	995.254	1202.65	1212.53	2431.81	1699.81	1383.72	1403.87	1645.59	1689.03	848.416	954.248	410.37	911.714			1044	1282.48	1336.8	587.04	1700.27	877.159	907.627	1399.95	1659.14		1823.34	1584.28	1504.01
GBF1	336.086	387.905	899	540.6	461.996	247.344	209.392	575.519	235.559	443.966	218.481	400.724	285.625	492.348	1116.9	696.588	302.741	288.932	481.449	447.161		449.692	441.499	269.4	222.375	468.494	452.747	372.643	391.762		399.806	517.978	680.055	497.096				501.564	433.581	277.496	483.914	232.938	259.935	492.991	409.171		304.177		462.619
GCA	839.398	395.819	267.543	508.091	504.756	137.162	659.136		1171.74	716.517	445.793		572.285		239.245	317.985	427.454	223.473	443.59	439.618		413.914	488.087	444.996		10657	586.864	513.404	619.396		525.505		605.5		384.334		317.527	549.767		269.502		181.89		367.948			343.67		197.285
GCDH	3444.76	3892.82	4242.92	4277.62	4392.47	4300.46	3984.92	4421.37	3689.07	4138.64	3794.98	3824.46	3377.79	3697.91	4544.78	3461.67	4081.52	4197.62	3968.42	3640.68	4550.16	3909.81	4021.86	3947.52	4706.31	4275.9	3867.57	3255.41	3895.95	3478.03	4012.97	3607.17	4436.68	3237.19	4320.67	4912.51	3613.04	3041.18	4437.14	4279.03	4468.31	3782.6	4027.19	4553.97	3192.39	3268.25	4470.6	3116.85	4095.25
GCLC	4177.56	4461.07	3742.36	5243.02	4729.53	4182.47	4429.97	4643.02	3906.88	4333.49	4276.38	4211.34	4188.05	4518.13	4497.46	4632.5	4827.85	3928.95	4588.13	3909.09	4928.77	4766.1	4261.88	4337.18	3940.29	3887.88	5604.64	4375.3	4302.97	4008.41	4255.36	4481.87	4645.12	4960.07	4767.78	4358.06	5206.78	4320.82	4585.77	4615.84	4113.94	4251.65	4830.72	4329.85	4946.03	5262.48	3778.62	4550.15	4421.51
GCLM	2245.44	2243.26	2094.78	1357.28	1715.56	1487.57	1857.44	2515.9	2573.14	1982.29	2204.97	1130.55	2720.12	1733.42	1714.41	1654.6	2155.14	2103.51	1125.14	2289.02	1561.76	1730.32	1592.47	1226.36	1611.87	1686.65	1620.88	1854.84	2002.27	1336.07	1692.4	1800.91	2424.1	2411.14	1413.06	2176.76	2609.19	2381.12	2015.64	2019.46	2399.52	1814.01	1684.53	2085.53	2570.02	1331.72	1307.68	1976.39	1665.65
GCN1	6849.5	6429.82	7654.71	6272.72	6932.46	6577.26	7234.83	5277.55	6742.87	7574.78	5853.77	6201.82	6992.65	7263.04	6938.64	5737.55	6384.27	6294.42	6989.98	6282.69	6572.56	6301.8	6130.75	6165.69	6880.71	4623	6913.96	6840.09	6891.03	2516.33	7019.13	5527.64	7105.11	6168.31	6573.33	1836.83	6421.16	6915.99	7035.35	6044.53	6707.48	5482.33	6505.16	6530.33	5882.84	2408.89	6483.88	1835.05	6776.06
GDA																										1322.08										1789.09
GDAP2	996.62	948.23	1540.9		1630.15	1658.89	1041.29			1163.6	743.952		889.167		1013.72	1298.07	1289.66	1168.86	1129.9	1508.95			1472.99		1658.06	1476.53	1208.86	1192.68	723.585			681.222	1156.06	1130.17				986.153		1254.75		1345.43		1302.46					1182.8
GDI1	7508.05	8399.85	7698.94	7963.24	7634.12	8490.56	6756.32	9562.61	7200.38	6802.22	7232.07	6218.13	7291.26	7420.62	7546.78	6287.02	8504.23	7990.37	7739.39	8018.17	7300.59	8173	8843.32	7835.86	6879.61	6859.22	6795.39	7632.25	7310.71	5437.1	7248.61	7836.93	8276.88	7671.82	6985.96	6921.29	7556.18	7874.81	8338.61	8363.9	7728.55	7318.62	8033.77	7265.88	7397.86	5960.74	7523.9	4972.72	7685.52
GDI2	28907.4	35960.8	31350.9	31383.8	32040.7	33101.5	27705.8	31201.5	30284.4	30994.6	30346.8	32554.8	29276.4	29860.8	31896.2	32676.6	33869.5	32012.8	29193.2	32754.5	29248.7	34991.3	35289.6	37711.4	30214.9	36230.9	26771.8	31923.9	28761.3	23783.2	29858	31725.1	31165.5	31458.6	30183	27209.7	30461.9	33566.5	34061.7	36698.3	30552	31481.7	31850.5	31442.7	30674.6	27768.5	30073.1	28165.6	32190.1
GDPD3	587.565																									4587.08										12743.4
GEMIN4	2075.59	1991.08	2289.62	2438	2389.28	2547.95	2640.37	2133.32	2265.43	2884.37	2067.14	2064.59	2791.83	2482.18	3050.82	2598.81	2267.82	2555.66	2291.27	3440.23	2746.84	2220.41	2467.76	2314.06	2143.75	1130.98	2684.79	2658.2	2347.18		2431.23	1846.53	2436.15	2380.45	2808.74	1699.04	2845.8	2027.29	2689.18	2342.59	2861.45	2254.81	2292.19	2568.3	2578.15	1763.61	2366.01	2005.99	2707.9
GEMIN5	3566.51	3394.37	3550.48	3511.69	3318.19	3351.15	3308.77	2870.64	3348.67	3844.06	3364.12	3401.02	3235.96	3143.92	3730.72	3471.4	3349.74	3709.61	3562.12	3284.96	2567.73	3650.72	3111.6	3526.27	3341.51	2062.08	3843.93	3658.9	3365.79	2351.47	3293.06	2962.83	3428.81	3787.33	3487.01	1785.85	3112.27	4073.71	2821.2	3441.09	3722.46	3789.07	3705.7	3729.55	3423.24	2541.83	3644.2	2385.29	3508.59
GET3	12967.1	15519.6	14864.1	15638.3	15704.4	16729.7	15076.3	14369.5	16568.6	15153.9	14233.5	15229.8	17790.4	16580.1	17406.9	15674.7	16167.2	18723.7	15898.1	17389	14877.8	15617.6	17677.4	17526.6	13224.6	13099.4	13537.6	17154.4	16276.9	12374.3	17239.9	14563.4	15530.6	16823.6	15228.2	13489.2	17316.3	16201.9	18288.4	19550.5	14797.6	16550.1	16366.3	18504.9	15341.6	14219	15918	16041.7	19456.7
GET4	5657.19	7367.63	6551.91	6691.56	5743.15	7120.94	5674.71	5443.69	6559.11	6093.6	7121.12	6515.06	6013.78	6491.14	6400.87	6452.63	6123.9	5528.04	5748.06	6101.15	4017.58	5676.83	5839.36	6444.89	6278.4	7057.43	6469.86	5540.87	5962.28	7990.98	5519.84	6868.25	7108.94	6681.67	7591.26	6738.69	7309.58	6030.31	7544.53	5211.2	6550.13	7203.01	6754.33	5987.5	5835.71	7814.91	5766.76	9348.81	7157.57
GFM1	5702.14	5692.52	5904.45	5917.55	5880.15	5990.34	5383.88	5852.29	6027.39	5285.85	5643.41	5572.47	5530.62	5568.22	5814.5	5820.25	5013.22	5669.5	6056.73	5572.39	6199.04	5300.25	6837.26	5754.89	5526.22	4557.94	6070.55	5505.51	5462.92	6456.59	5286.58	5638.4	5460.11	5881.79	6358.3	6039.49	6566.91	5783.46	6738.09	5752.04	5760.81	5625.64	5793.48	5129.55	5618.43	5042.64	5368.46	5739.58	5552.76
GFPT1	9543.46	9140.87	8487.42	9242.17	9870.11	9249.33	9936.31	8482.25	8988.55	10125	10048.3	9287.27	8852.67	9419.94	8744.82	9781.72	9920.93	8667.08	8450.68	9049.02	6709.88	9165.29	9601.96	8434.27	9713.39	7345.07	9677.52	8210.86	8754.45	8753.39	8431.55	9300	10089.2	8765.92	10621.7	8737.1	8776.99	9221.03	9521.59	8721.86	9509.11	9722.54	9431.59	9209.43	8684.05	9741.33	9040.34	8202.89	9274.49
GFRA1	4733.4	2558.73	4768.95	2637.29	4292.38	3184.83	4459.34	3151.61	3496.77	3939.38	3517.29	3629.36	3780.56	3734.1	3826.54	2757.67	3411.75	2973.84	3242.46	3143.75	2990.2	2977.42	2587.33	2359.17	2862.28	1287.62	3401.42	2852.35	3423.33	1363.07	3772.95	2358.9	3275.57	2138.39	2756.92	1588.03	2527.38	2331.05	3235.1	2584.81	2419.37	2812.33	2959.33	3017.61	2510.74	1354.93	3587.52	1128.39	3370
GFUS	2520.05	2955.49	2599.16	2994.82	2670.04	3277.49	2722.44	3437.79	3294.45	3064.03	2739.94	1905.59	2523.92	2409.45	2949.32	2528.98	3218.57	2834.34	2814.39	2387.2	2503.99	2652.02	2465.8	2805.63	2667.09	5625.7	2909.45	2829.74	2772.11	1890.04	2504.02	2977.95	2449.83	2881.86	2296.19	2851.8	3333.45	2950.06	3145.01	3016.02	3123.94	3377.13	2914.52	3152.85	2693.15	2801.61	2924.98	2603.85	3339.06
GGA2															87.3443						725.107	145.235																142.702	326.781						91.5452
GGCT	8294	10531.6	6506.67	11778.9	8057.29	11171.7	7884.84	8896.65	11098.6	11380.1	12219.1	14131.8	10138.2	11636.9	10971.4	13744.2	10221.2	9936.27	10909.1	11176.6	9041.75	11235.8	10518.2	10812.2	11397.9	21594.3	11196.5	11004	11485.8	14074.4	9749.67	13742.4	10170.5	11711.7	12556	17077.6	10490.8	10699	9040.92	9846.98	11547.5	12223.7	12281.5	10862	15889.2	14772.1	12924.7	14913.5	12028.7
GGH	1277.55	852.603	1069.44	1880.95	1484.64	1307.54	2313.27	1754.56	1536.66	1157.02	1081.28	542.017	231.647	1366.05	1295.79	1653.41		1133.18	1482.7	1156.21	1379.05	951.703	1214.53	704.01	864.569	3253.4	1475.58	1515.34	1150.4		1287.04		1401.6	1191.41	1012.31	2745.07	803.16	1358.32	1287.56	1101.17	1759.55	1684.72	1446.22	946.489	1455.52	1204.89	1686.87		757.131
GINS1	1215.85	1034.1				742.795	444.233	668.635	596.626	673.974		828.96		511.019	709.743			693.931				509.226	510.18	459.856	706.338						520.722	591.957						793.095						836.691					492.079
GIPC1	2707.12	2258.15	2388.73	1776.51	1582.87	2463.47	1162.14	2271.88	2891.09	1783.13	2336.2	2931.52	1631.55	2688.58	1465.23	1564.39	2570.79	2350.89	1595.08	2199.42	2167.22		1711.24	2612.6	2261.7	4400.28	1694.94	2825.04	1801.15		2637.09	3357.69	2165.63	2372.25	2144.13		2822.72	1814.64	2391.2	2118.1	3216.01	3152.88	2575.82	2239.02	2404.88		2018.43		1913.4
GLB1	3308.61	3785.91	3257.83	3865.47	3959.47	3800.29	2703.86	3935.84	4187.09	4325.51	4540.54	4309.62	4246.69	4737.34	4093.9	4704.12	4233.36	3952.13	3998.37	4814.17	2878.64	4281.68	3745.21	4155.44	3981.81	3291.51	3736.87	3944.37	3813.88	4702.45	3631.52	4398.28	3882.43	4362.89	4581.57	6125.75	3437.61	4168.61	3317.45	3773.71	4220.94	4116.59	3860.13	3657.2	4078.55	4386.45	4080.51	4738.01	3811.97
GLG1	1961.04	1857.54	2281.72	1714.78	1885.39	1988.07	2247.74	1766.61	1440	1838.2	1855.85	2080.35	2210.29	2109.54	2484.82	1251.74	1695.49	1333.93	1791.96	1873.21	1695.82	2044.15	2295.98	1637.36	2003.47	2542.18	2263.47	2077.52	1416.15		2617.23	1540.84	2216.66	2009.77	2415.15		2050.46	1575.19	1641.4	1899.9	1497.93	1830.02	2259.92	1938.67	1908.04		1805.48		1825.04
GLIPR2																										1948.77
GLO1	1006.1	987.96	113.286	524.217	577.19	779.391	649.6	782.642	564.929	555.074	691.886		541.309	705.921	509.501		637.735	918.184	1192.89	621.325	2349.77	725.636	950.821	959.117	1366.85	6327.95	648.343	349.253	917.4		1632.22	665.15	785.376	1361.39	693.637	2100.27	1198.9	564.358	867.289	782.838		592.57	783.069	1018.56	530.926		780.169		628.138
GLOD4	4970.39	6957.04	4417.48	6289.35	5751.57	6894.48	4611.75	6535.35	6470.91	6950.44	7312.74	6646.11	7851.41	7450.8	7480.09	6676.14	6989.72	8916.33	7092.21	8164.2	7476.65	8114.67	6149.49	7486.17	6199.41	7850.89	4886.29	8350.07	6854.15	5294.52	7604.84	6995.03	7575.78	8252.28	6448.34	5385.39	7861.53	8155.58	6540.28	7347.9	6591.25	7202.1	6583.8	8048.2	7933.14	5533.92	7355.11	5359.19	7170.66
GLRX3	920.396	703.19	754.661	651.651	728.233	817.758	928.303	562.463	735.246	841.53	1006.75	1258.96	905.694	1036.32	1208.22		618.364	1095.7	626.632	972.892	919.247	990.852	449.415	773.623	1145.58	2165.93	561.144	867.103	1308.82		1247.99	502.873	825.008	696.889	803.338	430.756	787.24	799.911	1086.19	753.381	481.134	610.7	520.515	1348.6	1083.75		940.922		887.789
GLS	949.534	850.719		1114.3	723.929	1292.38	1199.01	1225.94	1167	999.892	1125.41	772.404	1356.8	1244.81	1091.03	836.683	1146.51	999.167	1307.11	1296.81	1016.19	1180.67	807.032	1190.02	1124.05	1120.88	1011.25	798.591	1243.02		1099.03	1192.94	1140.12	1258.73	1078.59		1113.07	1055.47	693.217	621.711	857.539	1315.26	1254.18	1248.28	1514.18		1541.53	2911.81	808.827
GLTP																504.04		603.879								4325.12																639.967			545.368
GLUD1	3952.8	3409.19	3775.53	3730.55	3403.66	3312.63	3235.89	4086.73	3825.4	3569	3652.92	3465.32	2886.76	3664.24	3806.27	3592.94	3700.55	3349.27	3480.18	2820.49	3821.12	3528.36	3757.02	4007.38	2814.97	3208.41	3048.17	3738.08	3457.7	3409.43	3153.85	3176.79	3107.49	3317.9	3724.36	3126.05	3178.54	3580.14	3680.72	4195.63	2944.25	3284.81	3337.45	2880.6	2962.73	3324.74	3203.86	2869.78	2833.22
GLUL	810.274	1411.12	824.844	1261.4	1091.02	1211.71	775.727	1332.66	1123.04	946.101	571.127	913.326	1089.2	858.044	656.236	753.256	1101.01	1368.51	1181.86	1104.27	705.888	832.165	988.322	1391.61		16059.4	497.317	389.553	809.952	316.179	801.864	959.71	883.958	678.765	899.148	2585.11	892.495	996.214	1132.41	1194.01	822.569	1073.58	1101.85		981.785	833.794	621.419	834.644	799.281
GM2A		880.241																								4123.66									244.589	11860.2									843.659
GMDS	3159.75	3616.18	2249.8	4399.3	2842.9	3998.99	2567.21	3000.37	4201.64	3783.88	3693.09	3467.5	3620.02	3611.52	2898.63	4325.23	3848.65	2748.55	4655.37	4929.5	2151.16	3430.34	3613.52	4215.59	3871.92	2920.92	3821.62	3805.51	3447.49	4044.62	2309.64	3932.78	3835.54	3821.81	4097.17	4937.3	3624.77	3680.6	3175.76	3645.12	3020.23	3582.91	4204.89	3519.74	3855.84	3927.19	4320.23	4662.88	4856.32
GMFB	1433.97	913.138	1140.97	950.083	1107.82	1268.15	798.833		1319.86	1110.67	1357.59	1397.88	962.363	1502.96	1191.82	1517.71	1301.72	1332.07	1146.64	1791.23	1767.92	1239.96	722.1	1178.95	1248.77	1800.68	1517.12	1101.07	1118.26	1453.69	1322.95	1041.92	1348.65	646.394	873.644		1246.89	1001.63	1101.51	858.846	722.815		865.094	1147.16	1626.04	1777.14	1693.96	1751.2	914.467
GMPPA	3378.01	3207.7	3188.55	3284.77	3662.61	3722.69	3939.87	4053.08	2711.94	3799.5	3206.06	2954.68	3702.58	3892.19	3831.91	3929.75	4410.49	3366.05	4103.19	3636.61	4963.85	4463.51	6440.41	5996.79	3204.68	4799.2	2666.21	3587.55	3044.27	3423.52	3384.27	3586.67	4146.95	3575.58	4641.34	3801.15	3870.47	4063.11	5586.11	4706.47	3461.99	3934.98	4360.04	3567.51	4414.95	4849.81	3841.45	4443.71	3666.52
GMPPB	5053.09	5186.5	4547.15	4427.71	4711.9	6096.75	5214.81	5506.18	4660.97	5131.41	3723.82	4152.76	5514.89	4331.57	4255.84	5199.96	4855.82	5779.21	4425.56	5501.76	5191.68	4936.1	6213.83	5039.19	5493.11	8134.51	6131.08	5031.11	4762.24	4801.88	5628.75	5070.47	5276.21	5135.9	5448.68	5626.39	5707.29	6414.75	5878.4	5682.77	5517.47	5494.41	4956	4235.52	4720.05	6894.01	5408.53	3834.88	5068.19
GMPR2	2686.74	2570.14	1979.16	2627.43	2057.96	2514.69	2742.52	1991.82	2505.02	2528.27	2542.81	2723.92	2463.74	2442.6	3117.68	2899.96	2114.5	2642.59	2072.79	2362.8	2666.26	2073.94	2421.25	1735.57	2750.04	2527	2309.38	3139.19	1975.68	3138.77	2382.11	3199.58	1879.36	1869.36	2030.44	3391	2468.51	2098.33	1972.41	2269.72	2931.38	2512.28	2303.25	2667.29	2010.42	2694.64	2922	2033.29	2572.77
GMPS	16951.4	17713.2	17297.5	18485.9	16051.1	17950.7	17072.4	20962.5	17532.3	17758.7	16503.5	16577.2	16726.7	17476.7	16736.6	16147.5	17892.4	17856.5	16929.3	17528.2	18853	17752.9	19818.3	19224.4	18176.7	12568.8	18169.5	18935.5	18390.1	13509.9	17673.2	18420.3	19297.9	19849.6	20777.2	15271.6	19404.5	18950.5	19301	19937.8	16971.2	18775.7	17966.5	17566.9	19934.7	14385	16996.2	12241.8	19607.8
GNA11	5327.13	2980.51	4110.56	4793.51	3913.42	4343.41	4280.38	6081.36	3356.73	4249.8	5827.9	5522.62	5111.21	5115.55	4064.48	5448.53	2307.46	4175.99	4118.36	4127.36	6473.65	4001.19	3947.48	3331.22	4809.26		3886.87	3791.37	2787.79	11776.2	3526.44	6543.62	4170.89	6191.66	6483.5		4105.6	3727.1	5428.08	7124.46	4414.99	7566.37	4626.36	4647.83			5528.23	4543.11	4285.68
GNA13	3526.52	2826.5	3497.95	3389.23	3407.8	2939.59	3611.78	3348.19	3096.87	3051.89	3362.45	2417.36	2893.22	3357.18	3737.88	3141.42	3298.06	3247.2	3304.05	3268.17	2920.92	3434.56	3204.82	3622.04	3113.22	1572.66	3519.46	3192.96	3362.74	1939.5	3647.81	2462.71	3320.77	3375.33	2093.57	2088.48	2952.17	3357.99	3075.97	3380.92	2986.14	3301.21	2954.45	3108.85	2930.48	1771.62	2557.3	1922.7	2903.66
GNAI2	6918.31	6279.67	5500.83	6586.97	5118.42	6485.83	5848.72	6713.65	5525.45	4802.99	5678.19	6361.57	5076.49	4996.22	4805.96	5847	6549.77	5689.76	6520.46	5583.25	4799.36	6755.58	5453.45	5721.38	4206.47	8870.07	6694.57	4978.21	5925.58	3759.81	4786.89	6097.62	4660.6	6025.52	6230.86	5248.97	5104.91	5672.45	5638.16	5631.95	4392.5	5561.55	5374.63	5063.39	6050.54	5657.77	6690.56	3949.06	5321.48
GNAI3	11116.9	10603.3	9554.42	9960.69	11553.6	11949.8	9615.91	11419.7	11346.5	10926.2	10722.7	10136.5	12677.1	10440.2	10348.1	10291.4	11327.5	10296.9	9725.49	9602.72	9419.91	8650.17	11913.7	11245.2	9575.05	9470.04	10361	12563.5	9778.99	9760.85	10216.8	10555.2	12215.5	10568.6	10272.4	9168.92	11051.4	9373.33	11162.7	11640.8	10688.3	9543.81	9516.25	9822.45	10015.2	12844.7	7560.71	10319.8	10153.6
GNAS	13527.1	12321.2	12794.9	11439.8	12317.8	11688.8	11892.2	13967.9	11810.4	11490.3	10831.4	11518.7	12925.3	12051.7	12654	10336.4	10382.7	11069.9	12350.3	11834	11076.9	11897.2	12505.2	11067.1	12758.2	6380.48	13120	12575.5	12729.4	7464.85	13148.7	11809.9	13152.9	12235.5	10815.2	7545.57	11951.5	12914.4	12803.9	11128.6	13094.9	11602.4	13056.7	13679.5	13694.3	8213.39	12163.1	8526.21	12769.3
GNB1	22549.1	14745.9	16301.9	19690	19820.9	18083.1	17080.6	18285.6	18382.9	18077.3	16540.9	20209.6	22036.5	18803.4	17298.3	19468.2	15308.4	16442.5	19435.9	13782.8	18314.8	16249.9	17257.6	19511.3	21123.8	16172.9	17243.7	17239.3	17517.5	21043.9	13421.1	20020.4	16834.1	18108.6	19676.1	19198.1	22765.8	17146.1	17445.6	21663.5	23316.6	20441.6	21764.1	15386.7	22393.6	33880.6	17016.7	19855.7	23962.7
GNB1L	2053.55	1821.6	2173.12	2120.24	2332.2	1499.24	1610.2	1811.25	1927.88	2572.09	2216.56	2682.55	1863.41	2442.47	2134.9	2095.2	2048.35	1407.85	2054.39	2260.78	1873.37	2403.19	1487.44	2326.06	1554.97	1320.04	1806.57	1682.12	2163.32	3267.16	1416.72	2436.24	2076	2045.07	1839.46	3723.65	1950.09	2385.37	1707.46	2041.78	1768.76	1747.84	2219.75	1882.99	2066.82	1829.43	2051.22	1603.88	1632.29
GNB2	26670.3	21410.8	27378.8	24793.1	25263.6	29286	29499.4	22127.9	26724.4	24083.7	29789	29645	29844	25961.6	28745.7	27668.9	30215.3	27508	34537.7	27169.4	26119.2	24544.8	31572	28578.7	28986.8	27471.5	31004.8	23326.9	29532.1	30916.7	24531.7	28425	29586.7	27789.7	30409.1	29428.4	27333.3	18437.5	29028.3	24161.5	33918.7	32164.3	29332.6	29554.3	29537.3	34071.4	27852.6	36087.3	27974.8
GNL1	526.75	606.031	524.234	245.179	526.03	690.75	511.884	591.663	540.903	696.706	770.213	611.857	518.676	668.696	344.927	457.622	456.398	805.659	266.537	572.97		540.301	388.159	692.106			820.248	657.394	616.795		598.81	538.83	733.093	412.972			470.399	356.472		321.48	378.259		330.187	422.06	451.316		713.176		533.365
GNL3	2617.74	2015.69	1820.69	2248.49	2195.44	1980.9	2964.61	1196.31	1240.02	1850.76	1765.53		2755.52	1318.8	2165.15	1567.17	2889.94	1629.43	2346.25	1855.36	2134.61	1057.2	2289.51	1367.51	1821.67	2092.03	927.19	1726.6	2918.95	1980.79	2136.62	1597.88	2330.68	2297.04	1358.86	3082.41	2218.17	1800.74	1935.54	1611.47	1931.75	1790.74	1892.47	2064.93	2401.17	2322.09	1995.95	2994.56	2777.1
GNPDA1	2897.52	3443.79	2556.65	3807.95	2975.97	3905.57	1840.26	4106.55	3953.78	4300.02	4169.14	4060.93	4247.63	4506.21	4501.73	3385.38	4270.82	5336.31	3960	4607.18	3040.44	3932.62	3594.42	4696.62	4497.61	3602.85	3400.39	5712.19	4429.15	3885.13	4851.28	4064.14	3897.98	5258.98	3105.36	2511.76	3226.62	4314.38	3732.73	4349.63	3790.54	4386.65	3719.64	4681.87	4660.38	2385.13	3711.09	2973.13	3857.67
GNPNAT1	2653.03	2964.08	2405.53	3057.76	3774.38	2801.17	2177.23	2744.21	2738.46	3035.49	2290.5	2336.9	2686.34	2965.04	2927.58	2197.67	3341.09	3000.26	1965.27	3074.16	1827.97	3183.01	2789.39	3055.71	2382.18	977.769	2399.15	2876.84	2649.87	1152.96	2970.29	2448.29	2570.02	3260.82	2942.04	866.805	2720.8	2898.82	2436.72	2987.43	2789.13	2369.61	2152.37	2700.98	2582.34	2067.81	3506.62	1121.36	2904.05
GNS	1727.79	1055.32	1216.08	1095.6	1618.7	1483.72	1745.56	1701.5	1648.61	1311.21	1084.83	925.936	1680.93	1608.32	1516.58	1032.29	1343.74	1458.48	1391.91	1110	1818.89	1372.41	1360.69	1223.52	1676.94	1366.44	1732.64	1021.86	1398.83	1728.12	1864.85	1194.63	1240.7	1527.96	1385.31	4945.95	1198.84	1690.04	1414.58	1701.28	1427.93	765.38	1379.34	1577.06	1178.88		1052.35	1079.19	998.712
GOLGA2	1259.79	691.985	807.075	979.567	827.104	957.519	869.009	966.6	631.131	680.83	1437.02	616.657	770.74		545.927		1219.89	1076.2	866.012	1106.75	1323.84	1736.3	1097.13	803.358	1106.8	2223.64	1228.92	834.798	1136.79		1465.55	846.488	1095.91	575.014	1287.37		1002.11	1173.14	1311.04	345.586	376.502	873.486		733.769	329.659		1083.67	1749.33	988.401
GOLGA4	703.728	824.16	967.796	833.137	959.555	813.95	811.564	747.511	875.325	780.227	777.92	807.258	1081.53	806.728	1166.01	788.753	822.146	701.978	935.695	871.107	1094.37	631.169	887.698	867.163	1265.58	1467.34	986.338	1100.34	894.959		786.857	900.878	832.053	865.233	975.408		881.424	1051.9	747.683	927.791	1061.47	1312.58	968.799	960.32	822.463	527.956	811.403		970.401
GOLIM4	2011.53	1097.38	1180.36	825.1	2173.64	1415.97	1785.96	2626.9	2201.63	1510.84	838.715	1299.4	1275.19	877.143	1417.84	687.994	904.785	1267.54	1061.81	1170.04	1472.72	655.189	1220.75	978.111	1326.3	1364.15	1314.75	1076.51	1278.04	2089.79	779.133	967.1	595.577	920.289	1528.93	1619.31	1500.95	664.985	1035.54	884.17		1556.21	785.61	1251.9	1474.24	1470.76	1594.74	1577.18	1497.74
GORASP2	1016.74	419.33	560.473	765.465	834.204	920.412	769.848	740.477	955.121	1030.93	673.201	950.938	763.2	811.09	838.783	864.627	1099.3	919.897	916.688	1047	639.834	956.565	969.674	537.804	954.956	1296.31	1205.36	887.475			826.358	877.31	1243.75	248.147	720.627		729.419	1201.76	1090.4	771.659	771.896	873.386	677.387	1681.2	1273.99	706.641	875.357	1005.26	823.293
GOT1	6354.01	6440.15	6034.82	7081.23	5724.05	7858.07	6179.35	9553.24	7944.04	9860.46	7908.02	9352.56	9385.45	9927.48	7744.98	7641.32	8286.44	10204.6	7237.47	6937.09	7353.53	8822.22	7095.47	8313.63	7662.51	12492.8	7296.79	8989.17	7671.95	6312.29	7377.58	8270.33	7475.05	9081.22	7899.66	11014.5	7985.45	7857.19	7568.18	8044.17	8441.39	8670.01	9601.92	8045.29	8237.38	7248.45	9025.71	7319.23	8940.58
GOT2	5258.52	6339.16	4981.17	5549.32	5215.75	6389.02	5087.86	7160.47	6789.45	8119.09	6027.87	5359.74	6558.9	6750.34	6350.17	5778.64	6423.85	7449.32	6546.37	7172.88	6508.28	6873.97	6676.13	8612.56	6903.5	9914.34	6368.38	7299.95	5041.57	2199.86	7005.54	5720.78	5752.89	7478.79	5390.37	6561.63	5830.25	6838.61	5491.48	7330.36	7436.39	6909.26	6747.74	7587.83	6595.84	2676.03	6233.69	2971.6	7550
GPAA1	1481.88	1430.1	1457.12	1883.41	2025.96	1484.02	1406.24	1480.21	1194.82	1269.16	1047.39	1742.23	1218.67	1527.34	1740.51	1298.47	1820.89	1253.76	1622.01	1469.06	1276.73	2527.81	1540.61	1597.82	783.298	1762.36	1039.45	1280.29	1387.15	2082.65	1022.88	1068.13	1365.16	1782.36	1810.42	1903.05	1458.01	1851.45	2073.92	1428.84	1089.28	1308.41	1365.68	1110.12	1508.11	1305.55	1195.6	1118.2	1926.37
GPD1L	2841.66	1922.08	2272.28	1761.01	2480.91	2072.68	2717.57	2183.06	1769.23	2321.68	2011.79	2179.81	2744.91	2248.15	2327.4	2232.41	2573.23	2884.2	1995.25	2845.69	1388.68	2301.24	2503.05	2047.04	2122.68	2065.56	2017.71	2620.16	2644.92	2265.87	1973.08	2403.41	2613.13	2480.34	2724.63		2426.76	2447.56	2758.49	2189.08	2758.7	2457.92	2147.83	2289.7	3583.83	1049.82	2581.74	2017.91	2648.73
GPD2	1122.22	1601	1234.66	1287.7	782.314	1109.19	1183.06	1334.13	846.092		1075.31	988.028	1186.05	1141.15	980.145	834.52	1123.15	949.772	1187.59	1214.19		1391.44		744.989	1031.2		883.591	953.188	737.547		1054.05		964.117	517.52	757.238		858.658	1227.85	950.321	884.618	946.163	1429.31	578.832	818.655	1134.13	1075.83	530.763		1220.94
GPHN	2378.49	2541.62	2089.39	3094.51	2461.3	2547.38	2728.69	2328.24	2464.1	2597.42	3027.2	2390.02	2902.89	2717.61	2672.3	2451.25	2531.28	2524.11	2758.29	2187.75	2854.41	2591.2	3010.84	2793.89	2845.13	3016.45	2676.65	2940.34	2907.87	2049.37	2818.71	2975.1	3070.36	2739.92	2570.73	2707.38	3124.86	2714.88	2387.01	2494.78	3251.25	2691.18	3190.69	3176.87	2758.34	2365.07	2987.62	2197.09	3106.04
GPI	24795.1	28387.5	18632.7	22688.3	22045.1	28418.5	21613.3	29208.8	30217.4	37505.7	29400.8	33024.8	31428.2	36788.4	32375.1	33373.5	32072.6	40472	30471.6	35658.7	25112.7	34938.3	28701.6	36060.3	28276.2	39318	25783.8	39097.5	29153.8	9488.92	32374.3	31789.1	31580.1	36858.3	26105.6	15985	27680.6	38060.6	25336.6	35342.4	34813.7	30893	30575.1	36511.7	32374.7	16318.3	30911.8	11312.7	36464.9
GPN3	605.668	707.354	613.326	846.077	550.325	1408.78	568.905	857.019	607.563	407.223	550.962		923.88	896.833	558.83		891.049	1240.58	364.231		926.663	473.148		295.35			475.258		576.443			678.308	691.244	425.472			665.265	550.824	440.383	548.5	491.755		448.729	394.415	539.025		428.738		549.301
GPR153													1015.33																																			607.155
GPS1	1373.32	1294.21	1185.83	1159.37	1884.63	1327.34	1372.77	1081.68	1320.29	1300.84	1626.96	1667.68	2025.89	1693.44	1797.82	1427.78	1020.17	1530.61	1726.17	1140.17	966.335	1397.23	1428.73	1577.49	1485.06	1310.6	2101.46	1557.56	1790.94		1705.82	970.505	1797.59	946.62	1145.76		2060.52	1333.96	1959.98	1302.57	938.673	1547.64	1147.38	1728.54	1711.55		1653.52		1511.49
GPT2			282.015		164.27			269.711	185.964	135.716				168.482				239.987	111.178		77.6381		219.124	248.729				115.202			344.726							235.203	341.364	220.665			305.692						270.277
GPX3	275.349						537.635					162.454			458.036										272.751	1403.36										1234.76
GREB1	2745.7	2627	2834.56	2427.32	2687.74	2491.72	3045.61	2580.4	2750.4	2056.9	2582.93	2224	2862.04	2462.79	2361.02	2085.74	2799.78	2564.13	2903.46	2858.97	2487.04	2706.25	2974.68	3329.21	2815.56	2102.63	2918.74	2463.95	2891.72	2203.71	2641.55	2778.41	2989.71	3295.74	3254.54	2420.13	2631.07	2254.27	2781.77	3087.45	2848.27	3121.14	2456.47	2447.82	3210.52	2577.3	2809.69	2651.5	3571.29
GRHPR	1953.42	1785.92	1804.58	1723.45	1600.28	2014.85	1929.62	1813.15	2018.81	1765.42	1391.15	1294.82	1474.96	1267.54	1786.69	1163.73	2299.86	1579.11	1649.74	1694.58	2034.64	1227.89	1821.53	1955.74	1748.4	1960.95	1073.25	1635.14	1863.64		1910.01	872.893	1781.84	1711.29	1611.7		1504.48	1852.6	1733.97	1906.68	1738.67	1475.79	1551.58	1838.65	1685.48	1201.83	1438.38	1055.69	1588.19
GRIN3A	6379.65	5739.96	7106.29	3810.4	7500.54	5069.72	3837.99	3285.61	10881.4	11092.2	7926.91	3068.05	1857.36	3253.35	3718.36	5850.9	4971.93	2188.97	2856.12	3773.53	6652.12	4014.32	3100.96	4422.84	4202.33	8881.49	3480.92	4641.78	2674.71	3416.11	3034.68	4021.54	2650.66	4064.57	3478.53	3844.18	2673.56	4238.03	4654.97	5692.29	3156.44	3233.11	3130.64	3056.83	2177.86	5354.15	2032.88	4421.38	2651.45
GRPEL1	1279.66	1548.74	1598.96	1570.75	1575.66	1863.37	1831.52	1696.49	1622.82	1857.67	1599.14	2304.04	2033.61	1969.58	1413.37	1337.08	1676.74	1907.44	1896.38	1956.18	1730.5	2037.45	1625.31	1343.57	1632.85	1219.2	1849.66	2132.64	1445.49		1899.03	2183.57	1607.66	1560.62	1688.14		1822.55	1699.4	1721.12	1533.29	2058.26	1646.78	1921.38	2261.92	1593.85	441.844	2344.91	815.433	1574.96
GRSF1	1365.84	1093.97	1390.14	1067.75	1285.64	1071.44	1616.08		1271.68	1804.02	1697.34		1854.34	1377.07	974.946	1316	1153.21	1264.76	1536.75	1859.98	1439.24	1625.42	1489.02	1512.58	1495.47	1167.75	985.171	1498.48	1521.98		2414.75	1608.05	1065.65	1825.49	1195.57	1493.92	1123.36	1283.54	1300.23	1371.24	1881.27	1127.55	1524.89	1743.7	1596.48	402.778	1519.93	617.404	1698.06
GRWD1	2943.08	3460.5	3403.66	4034.97	3217.35	4026.17	3107.86	4570.04	3098.86	3346.59	4043.9	3781.12	3809.25	3852.16	3509.37	4042.83	3774.46	4043.8	3873.55	4259.12	4472.83	4037.57	3764.91	4084.05	3610.79	3334.87	3359.89	4060.69	3660.46	3966.76	3397.53	4570.51	3648.69	4003.96	4305.69	4054.59	4094.71	4032.78	4144.46	4138.52	3741.53	4157.32	4118.71	3682.93	3699.3	4070.92	4030.8	4765.62	3729.11
GSDMA	310.179	471.857						437.097			480.978				511.823			197.858			782.581		903.414			7272.74		501.737						717.161		7019.96									2141.91
GSK3A	4370.38	5413.07	5960.14	5561.98	5825.12	5941.9	5325.42	6510.31	4369.69	4319.25	6355.56	5715.65	5043.66	7421.38	5546.06	5574.96	4116.12	4518.08	6640.21	4999.9	4798.86	6544.26	5728.91	5517.17	5170.67	6073.03	6297.95	5421.06	6775.08	4610.51	5727.08	6958.84	7195.48	5130.82	6243.89	6073.76	5773.66	4959.66	5425.62	4000.58	5223.11	6043.36	7072.44	5669.59	5212.62	4843.58	5654.12	4824.18	4646.61
GSK3B	1780.29	1913.89	1686.83	2525.54	1575.59	2054.09	1627.93	1456.15	1730.67	2065.83	3658.48	2076.54	2180.55	1510.54	1977.22	2404.03	2379.3	1640.95	2832.36	2396.72		1377.91	2808.92	1927.53	2371.16	1807.38	3102.01	2436.47	3110	1838.9	1842.16	2014.46	1649	2147.6	2392.19	1730.09	2053.13	1695.16	1569.89	1299.73	2420.85	2350.39	1887.33	1839.7	2365.58	2333.39	2085.24	1764.27	2286.32
GSN	995.06	1027.19	632.107	895.336	1647.3	1071.6	899.866		1140.98	1573.61	1011.97	2280.98	1148.91	1292.59	1576.82	1297.91	963.947	1372.19	1114.46	1147.1	1601.73	1775.84	1191.33	1144.43	987.666	32148	1385.42	1434.41	960.868		1277.71	1497.23	1511.5	1315.51	1700.29	3986.83	1324.74	1048.05	1292.26	1367.86	1118.02	908.582	1045.14	1286.53	1855.86	1474.57	1108.21	2343.38	1472.45
GSPT1	1912.45	2360.93	1670.28	2857.24	2053.91	1521.37	1864.26	2485.68	954.796	1720.33	2258.09	2229.25	2390.84	1967.18	2422.75	2064.1	3138.32	2464.02	1944	2879.65	1990.75	2607.25	2191.51	2684.94	2178.39	2766.84	2309.4	2262	1890.68	1862.82	2074.6	2171.58	2651.96	2397.6	3328.25	2371.96	2496.15	2775.13	2732.82	1835.29	2885.56	1904.48	2373.99	2033.04	2222.35	1728.74	2361.58	1353.54	2111.35
GSPT2	733.777	1053.43	858.99	647.258	726.279	864.058	500.099	2717.69	776.871	888.704		893.535		1524.89	636.387	629.627	706.673	1655.48	1083.19	980.373	1907.51	807.466	3722.25	1880.79	787.492	1499.99	1313.39	1285.32	1145.49	843.541	544.079		1167.75	1009.25	1030.03	1384.96	1582	1813.99	3277.7	2310.67	1910.26	1124.47	1528.08	991.061	734.91	1001.2	1373.21	945.514	1304.57
GSR	12700.7	13253.9	10457	13915.2	10832.2	15022.8	11177.9	15122.6	16182.9	20212.5	19113.8	23303.1	21174.4	21988.7	16194.8	21730	17056	19907.8	17554.5	20083.5	15730	20027.8	16994.3	18976.7	19249.6	17069.9	18121.1	20454.9	19838.3	24082.1	15553	21198.8	16231.6	20657.3	18498.6	22318.8	17355.9	17916.8	16751.1	15823.1	19962.7	20841.7	19493.4	18435.6	18916.2	22318.1	19987.1	25758.9	18040.3
GSS	2984.33	3689.51	2466.03	3319.41	2341.46	4340.93	3190.95	5328.59	3679.85	3913.19	4627.63	4746.67	5235.13	5578.64	4908.55	4515.37	4590.16	5225.16	4654.61	5508.74	4535.27	5053.57	4579.75	4856.03	4742.94	5212.64	4460.67	5682.7	4725.55	3642.33	4368.63	5108.21	4361.43	5379.52	3741.81	5398.46	5007.81	4587.43	4032.3	4876.58	4703.61	4718.56	4400.71	5544.51	5939.92	4016.95	3978.77	4591.76	5609.18
GSTK1	308.962	145.394	326.819	568.17	704.239	432.59	364.91		530.38	406.275	200.777	456.189	230.584		338.156		322.53	284.784			347.523	530.501		192.626	456.589	1597.49	470.722	346.022	361.883		531.368		357.278			614.939	479.882	386.734	344.258			279.065		429.183	565.381		341.945		497.782
GSTM3	2538.4	2759.84	2521.49	2579.42	2290.01	3201.46	1809.28	3316.29	2535.74	2845.05	1891.9	2299.07	3562.91	2533.57	2737.67	2258.97	2842	2594.61	2239.74	2301.22	2112.41	2427.4	2091.98	2448.7	2331.51	1488.9	2100.7	2699.25	2918.85		2381.12	2901.69	2194.19	2653.73	2109.19	1584.86	2143.59	2802.12	2359.99	2768.94	2500.9	2358.39	2610.46	2672.57	2109.87	679.454	3062.56	1382.74	2592.27
GSTO1	11166.6	11055.8	10642	11520.1	10704.8	13035.5	10202.5	11533.3	10450.5	10957.6	8939.68	9589.52	9971.89	11711.6	11088.6	8878.28	11164.1	12720.1	11200.8	10801.2	7531	10700.9	11026.1	11758.5	13297.5	18148.5	11164.3	11831.8	11545.7	3932.83	15620.9	10478.7	10657.1	11482.4	8977.2	6584.79	10665.2	11919.6	10720.3	12829.3	12302.2	10732.6	12870	13571	11869.1	5030.35	13479	3542	12915.6
GSTP1																			1307.21							24854.4		1275.1								2475.49	258.859
GSTZ1	635.911	723.174		698.432		419.907		1152.09	957.952	577.292	1080.54	1429.22		1268.19	842.852	1189.93	1323.3	813.056	1303.18	689.339	786.474	832.748	902.102	1076.87			615.48	883.622	315.441		455.78	1236.62	458.39	1118.29	563.654		959.716	947.6	1725.73	927.245		745.73	577.337	1219.61			701.023		1366.3
GTF2E1	336.515	281.22	303.803		335.13	380.611	364.051		319.02		432.619			413.673	285.052			117.859	571.288	101.364			311.191	161.019	594.225		224.064				450.22	184.297	185.516					336.926		548.875		170.076	296.7	194.144			286.82
GTF2F2	184.624	424.858	251.835	388.174	211.248		390.467	158.75	275.708	421.198	306.486			277.452	192.138		463.326	288.513			399.037	273.743	314.968				323.938				237.686			363.919			99.8954	173.459	166.056	318.772	287.237	322.236	506.301				368.793		215.81
GTF2H4		251.982													454.189	460.185			975.336			274.772			394.131				630.333								953.825		332.158					448.815
GTF2I	8065.4	9217.22	8738.66	9010.11	8511.06	8525.11	8117.04	8222	7999.47	8445.81	7012.17	8069.93	8184.17	8894.79	8899.54	7877.9	9310.72	9907.9	8935.89	9328.02	8443.89	8945.36	9234.27	8496.45	8930.02	4727.9	9026.38	10011.8	8654.25	2661.42	10421.5	8119.72	9545.29	9274.34	8206.95	2969.67	10323.9	9956.75	8827.68	8830.96	8632.03	8058.09	8620.53	10767.7	8254.14	4296.84	9172.32	2383.72	9303.35
GTF3C1	2011.22	2021.37	1723.08	1441.08	1532.54	1924.86	1717.86	1453.56	1445.32	1547.72	1666.79	1532.96	1969.94	1507.92	1570.52	1688.33	1953.83	1770.36	1536.74	1410.37	2156.72	1240.34	1309.78	1347.13	1424.48	1316.34	1397.73	1591.67	1581.38	944.018	1509.74	1838.89	1566.65	1504.02	1413.53	1125.63	1964.92	1790.31	1387.88	1119.64	1005.5	1209.47	1750.94	1631.48	1353.45	1485.2	1421.97	1106.29	1538.97
GTF3C3	1954.8	2254.2	1770.85	2200	2132.93	2137.65	2107.47	1922.35	2209.31	1884.94	2032.88	1862.81	2185.05	1633.91	1755.6	1884.25	2303.51	2028.16	2598.68	2248.51	2439.94	2201.95	2006.29	1830.85	1824.24	1973.96	1747.44	1732.28	2416.65	1331.07	1824.24	2236.36	1991.18	1952	2215.92	2597.16	1787.58	2070.34	2442.62	2012.35	2056.74	1704.53	2513.46	1689.78	1639.2	1759.28	2359.25	2615.12	2088.34
GTF3C4	1657.77	1364.45	1453.45	1107.37	1699.5	1675.18	2005.51	1545.82	1752.57	1336.27	1332.21	1463.15	1688.28	1446.96	1502.98	1508.4	1354.07	1305.89	1802.23	1700.7	941.368	1562.77	1407.88	1565.58	1741.19	1038.48	1511.79	1219.22	1674.13	1731.76	1548.85	1443.64	1635.13	1475.82	1361.7	1262.13	1313.73	1355.76	1258.29	1812.92	1835.91	1899.08	1399.84	1656.14	1120.61	1753.31	1316.37	1498.39	1458.5
GTF3C5	3193.49	2642.54	2730.78	3100.47	2570.34	2691.16	3492.71	2774.98	2501.62	2642.41	2888.56	2800.27	2901.66	3065.49	2615.64	2965.99	2762.97	2748.11	2826.69	3138.05	3573.36	2791.13	3060.62	2963.89	3044.86	2797.25	3275.84	2683.35	2745.65	3308.82	2947.8	3534.83	2809.63	3177.96	2826.34	3023.5	2761.08	2571.6	3062.61	2657.29	2897.66	3378.17	3084.38	2556.11	2829.09	3042.19	3079.14	2936.17	3051.45
GTPBP1	399.973	547.361	471.419		660.136	389.806	465.111		710.297	336.568	472.741				456.852	344.117	524.285	359.696	444.037	609.732	342.781				205.287	611.262	445.418	149.959	191.315		281.05	359.076	235.554	267.103		441.403		358.804	306.317		449.326			402.834	211.252	143.834	469.768		319.032
GTPBP10		143.902																				103.465			214.648								233.25								194.166								175.303
GTPBP4	2544.04	1558.73	2033.14	1250.23	1906.88	1652.77	2011.42	1257.69	1709.42	1265.19	1669.4	1309.89	1510.88	1367.87	1398.57	1042.82	1142.5	1418.67	2139.63	878.987	1311.5		1617.76	1122.47	1814.83	1970.37	1340.7	1458.69	2092.14		2457.8	1554.45	1406.11	1408.66	1346.68	1542.77	972.806	1689.7	1246.18	1290.02	1132.66	1644.71	1069.81	1406.23	1675.83	1536.07	2112.28	1310.38	1871.04
GUCY2F	2455.93	2730.93	2356.33	2383.93		2587.69	2778.12	1800.17	2343.09	3199.81	2063.58	1915.83	1950.73	1971.21	2441.52	2122.97	2165.48	2318.91	1976.04	2116.14	2252.29	2534.83	2028.92	1514.84	2835.82	1323.56	1305.5		2204.33	947.518	1630.15	2662.46	2863.75	2193.51	1691.31	1167.09	1925.07	1806.86		1568.71		1678.65	2501.61	2014.82	1801.39	1391.37	1533.69	856.437	2510.5
GUSB		312.31														400.576										1212.67					343.338	672.396				8134.22									425.117
GYG1	2439.6	1730.44	2024.45	2154.15	1829.69	1990.48	1465.86	1586.22	1450.87	1637.08	1696.77	1356.77	1976.01	1862.97	2548.26	1524.62	1944.5	2267.85	3039.95	2346.56	2113.97	1911.08	1883.86	1968.23	1948.71	4009.34	1636.78	1652.98	2620.37	1827.4	2587.85	2095.44	2005.15	2072.64	1228.23	1984.85	1665.43	2517.97	2549.47	2131.96	1144.52	1899.97	1894.81	1899.36	2051.65	2714.27	1872.4		1699.34
GYS1	2936.2	2656.72	2447.92	2907.1	2962.91	2618.42	2873.06	2755.7	2792.9	2366.38	2499.33	2064.29	2775.53	2441.61	2506.27	2343.45	2658.17	2669.67	2587.52	2817.53	2906.38	2809.98	2677.34	2562.8	2693.28	3889.43	2271.41	2280.24	2897.53	2411.31	2526.47	2721.19	3082.4	2385.52	3278.61	2413.72	3281.05	2366.24	2707.24	2678.36	2623.32	2841.63	2197.24	2777.9	3354.9	1987.19	2474.61	3281.51	2890.25
H1-10	461.931	96.5592	388.591	488.051	244.466	152.013	187.754	1001.86	267.294		853.642	418.418	454.611	174.026	498.55	438.256	597.022	195.994	400.606	250.562	503.189	330.448		420.383		324.376	822.089	587.891	287.469		504.373		640.443	555.713	181.216		454.901	389.307	368.187	573.984	992.045	173.529	666.601	152.779	436.223		256.765
H1-5	14827.8	9893.43	11047.1	9292.97	10456.4	8365.89	8728.82		10778.8	10663.3	8377.6	5897.33	8801.63	5940.1	11143.6	7927.11	10825.5	8112.95	9850.12	4680.39	12129.4	7250.26	7757.71	5613.13	10622.9	34181.5	5899.3	9481.18	9954.4		11390.5	5537.92	9878.29	9018.73	7167.63	6625.21	6930.8	7200.63	9019.17	8698.28	7700.11	9288.53	11285.1	8947.44	8273.77	9414	8622.08	6154.1	10371.6
H4C16	4934.91	3385.14	3819.08	2815.98	2966.28	3534.16	3431	2431.13	3836.99	6493.97	3867.01	4395.84	2914.31	2263.8	3705.91	4197.97	3823.18	3049.46	3671	2666.8	3234.58	2520.77	3458.14	3049.57	4874.83	751432	3517.95	3180.37	4390.44	3978	4871.23	3118.07	4004.15	3136.27	3731.35	25773.3	4062.07	2378.81	4220.19	2910.13	3157.92	3790.32	3437.86	3833.45	3072.07	5197.53	3510.08	3326.54	2583.96
HACD3	4280.71	4950.01	4321.71	4603.24	4753.91	4550.29	4346.15	4185.28	4459	4744.34	4711.89	5571.78	4559.08	5110.84	4245.36	5480.05	4713.41	4188.5	5614.74	5265.21	3441.59	4376.27	4906.71	4836.56	4306.05	3892.14	4670.46	4289	5747.31	4222.2	3845.54	5453.02	5000.97	5361.82	5317.9	5159.43	4883.9	5364.81	5319.35	4921.7	4817.78	4767.19	5332.87	4186.87	5169.1	5187.54	4875.46	5153.26	5310.39
HACL1	628.092	653.056	293.884	1019.63	516.588	985.754	406.733	916.842	643.328	378.496	606.21	537.214	991.068	525.729	807.283	373.525	348.087	713.75	692.208	767.581	538.825	425.763	1007.64	500.491		455.826	574.767	679.754	442.591		910.904	769.591	692.358	987.541	708.273		590.441	901.697	389.306	717.976	513.218	577.824	931.73	730.613	704.88	785.079	394.518	366.147	452.782
HADH	11466.4	14560.8	13242.1	15568.2	12125.7	14915	12083.9	17580.7	10462.1	12310.1	12301.5	11578.9	18120.9	10076.3	13333.9	12742.3	17745.1	15401.1	14875.2	11576.9	21006.3	16738.1	24593.3	20240	12450.6	11365.1	15461.4	16894.5	9415.06	11041.8	13129.2	12774.9	20078.6	13149.1	14114.7	10485.7	18913.5	17149.4	21794.1	18444.9	12954.7	12084.6	14088.6	13885.7	12049.2	10917.1	12288.5	10324.4	15174.5
HADHA	9535.41	9106.62	7997.15	9301.34	9225.28	9142.77	8784.34	10426.9	8691.99	8220.69	9042.78	8452.59	7430.65	9805.75	8221.97	8559.58	9319.5	8732.41	9159.94	8314.63	9173.86	8960.67	10397.5	9353.58	7746.12	13086	8620.59	8411.29	8577.05	7792.15	8701.64	9196.57	7824.75	7746.42	8586.1	9430.71	8999.68	9264.77	9031.36	10065.4	8658.54	9169.52	8411.81	8201.11	8235.11	7255.53	8372.42	6843.67	8728.62
HADHB	5871.1	7393.36	5835.07	6938.27	6266.52	7600.71	6347.95	6813.69	6325.66	5415.34	6270.79	6587.55	6729.38	6390.3	6973.17	6657	6436.96	7626.71	6127.16	7518.53	7511.17	6622.27	7446.51	7129.24	6653.21	13269.5	5735.64	7506.85	6376.09	4947.88	6376.32	6690.68	7257.18	6285.7	7097.99	7634.25	7642.48	7348.01	6938.52	6323.84	6956.67	7141.79	7492.2	6666.92	6734.8	5329.7	6758.05	5365.13	7160.74
HAGH	845.278	1078.71	673.798	1144.09	1076.53	1163.19	890.743	1046.94	1069.37	1101.24	1554.04	1493.9	1214.54	834.634	1014.74	1119.9	1004.3	950.991	1024.11	1293.7	934.793	1017.4	713.702	1121.81	1088.57	1634.83	1018.03	1083.93	1098.44	1535.79	1003.93	1146.71	887.32	1260.88	1194.1	1103.11	1412.89	1368.25	1036.1	1302.78	1004.39	1543.76	1626.21	1001.94	1554.28	1265.34	1069.92	1435.65	894.126
HAL	511.963			467.418		378.791									416.702		621.475		231.428				1247.61			14247.1										688.242									3184.22
HARS1	5716.42	5310.28	4701.94	5624.7	5369.63	5418.76	5010.72	6613.99	6492.91	5683.2	4811.66	5928.51	5213.11	5394.96	6366.15	5018.99	6161.46	6107.26	5622.86	5702.31	5857.41	6141.38	5409.86	5066.5	5034.35	10838.4	6288.26	4976.04	6038.45	2014.87	5593.92	4487.39	5406.47	4388.09	4825.56	2029.59	5217.15	5973.07	5625.87	5944.7	6034.1	4863.8	4853.4	5031.49	5844.69	2324.85	6184.14	2228.27	5955.08
HARS2	3824.44	4105.97	4233.78	5445.01	3990.56	3171.43	3957.06	3430.49	3925.45	5148.77	3987.41	2711.8	4100.47	4249.68	4073.98	4347.92	4479.14	3605.85	3801.13	3697.42	3768.66	4457.85	3101.47	3843.75	3883.67	8510.64	4918.63	3340.42	3610.02	1849.42	4842.81	3826.83	4422.65	3764.06	3938.82		4986.52	4659.66	3688.98	4435.08	5180.43	4499.46	3098.95	5158.72	4054.06		4046.68	1571.44	3178.75
HAT1	13223.7	10404.5	12937.8	12309.9	13001.8	12439.4	13094	10308.8	12105.7	11455.7	10976.8	12158.5	10352.9	11429.7	11553.3	12365.3	11295.5	11436.7	10350.6	9343.48	10500.4	11583.7	11766.1	12910.4	11762.9	8770.53	11548	11074	11463.1	10309.3	10753.7	10231.2	11068.1	11950.8	11684.1	9691.94	11038.3	10225.1	11735.8	12588.8	11465.9	11814.2	11172.2	10450.8	11694.8	10689.6	11992.6	10668.8	11472.6
HAX1	2281.34	1804.36	2273.58	2015.47	2643.05	2117.15	3376.41	2228.68	2274.76	2117.6	2645.98		3352.01	2141.52	2764.62	1730.04	2401.66	1798.35	2893.26	2231.57	2493.01	2428.85	2497.87	2256.37	2252.87	2533.11	1719.11	2484.46	2387.76	2800.97	1874.14	3156.9	2624.83	2644.9	1824.4	2844	1724.03	2422.6	3110.32	1655.23	2977.87	2369.93	2084.45	2246.88	2343.09		2233.85	1762.83	2326.37
HBA2		762.419			986.811		1197.53												1050.45				1006.22		1253.21	95366.6					1662.76		1075.03		1204.31		1028.48		1016.22	822.686			2578.2					1406.94
HBB	931.831																									42151.2
HBS1L	981.236	1027.62	965.039	1153.62	783.875	817.768	1447.18	1054.15	1102.99	1160.72	1163.1	1205.08	709.435	1106.17	1473.84	1313.99	1231.08	773.258	1408.67	1038.4	1544.52	1192.36	1040.77	1087.02	1024.73		1546.36	1291.36		1652.66	1664.44	1592.92	1140.39	1617.99	1529.87	1104.3	1580.2	1002.61	1326.09	1075.88	1167.46	1128.27	1584.74	1036.28	1171.69	2606.72	884.625	1996.02	1207.68
HCFC1	5561.55	5138.03	5690.37	5748.38	5484.19	5365.4	5516.67	4856.64	4993.84	5252.78	5006.17	5366.19	6243.49	5142.21	5236.86	5350.81	5095.05	5230.73	5898.14	5268.74	5652.08	5208.17	5444.69	5549.95	5824.85	4001.13	4870.81	6150.46	5775.87	3926.82	6117.28	5352.59	6258.06	5110.11	5346.17	4279.17	5382.89	5248.45	5775.75	5067.65	5718.75	5178.95	5660.04	5626.26	5203.22	4131.97	5625.22	4511.55	5794.81
HDAC1	4347.9	4774.04	4087.8	5508.12	4487.03	4695.15	3893.7	5085.08	4513.63	3753.37	5764.71	4733.09	3893.71	5073.03	4595.98	5037.49	4964.1	3526.43	3756.37	4596.1	3477.07	4866.86	5022.91	4483.14	3545.3	4049.23	4079.27	4757.51	6083.43	3146.05	4362.7	4692.75	3889.46	5128.89	4779.4	4374.22	5188	4067.87	5111.44	5188.21	4174.48	4638.6	4967.45	3679.11	4580.65	6084.31	4663.63	3224.5	5256.63
HDAC2	3358.85	4320.19	4258.14	4632.33	4245.92	4094.95	3905.54	4392.07	3433.67	3720.84	4232.51	3752.66	3883.59	4461.72	3832.89	4778.39	3673.61	3921.92	3381.79	4634.83	3109.56	4193.91	4096.88	4868.15	3929.73	2631.42	4068.99	3752.1	3910.17	3997.45	3782.72	4118.31	5227.75	4367.34	4291.54	4542.72	3998.08	4182.76	4169.21	4390.28	4591.74	4387.72	4147.59	3542.76	3979.9	5298.25	4947.86	4479.8	3922.07
HDAC3	1666.44	1152.45	1120.83	2177.96	2047.29	1959.19	1571	1183.81	1849.46	1441.29		1873.47	1574.59	1593.06	1224.01	2551.76	1919.35	1127.25	3111.89	1990.08	1940.55	1213.08	1192.58	1699.25	1839.13	2231.78	1926.02	1424.21	2090.27	1787.21	1252.71	1233.97	1593.76	1853.11	1946.4		2155.72	1136.48		1369.12	1250.42	1534.28	1776.38	1627.64	1116.09	2048.23	1232.8	1679.2	822.191
HDGF	943.486	265.247	470.589		560.425	302.737			451.776	193.6			801.68	669.055	306.185		569.026	220.665	391.943			503.345		492.451	515.781	888.755			630.535		520.03		809.672			579.072	558.012	189.463			606.098			441.775	662.636				587.482
HDHD2	1535.74	837.106	1104.84	1335.16	1051.05	1315.3	1076.41	2060.46	883.948	1085.35	1180.91	1563.81	2127.69	1172.39	744.231	1340.6	1439.31	834.237	1803.84	1238.5	2563.71	1036.59	1109.59	1204.97	1570.87	1786.92	828.829	1988.13	1652.84	1782.42	1389.99	2176.25	1190.84	1533.51	1675.88	1489.96	1361.44	1201.84	3376.37	1625.08	1033.56	1364.4	1814.62	1571.08	1542.18	2081.16	1317.17	2807.28	1539.76
HDHD3	554.587	293.733		586.229	428.065	335.606	440.217	915.215	276.912	371.704		286.554		931.249	453.799	387.177	466.388	715.114	202.682		367.64	432.221	612.346	558.456	626.141			318.174	482.647		592.225		195.898	397.583	472.369		503.986	567.27	816	441.094			368.268		498.481	195.494	805.111		457.682
HDHD5	1869.56	2069.93	2194.04	1489.04	2051.33	1670.76	1662.6	2336.78	1919.1	1810.15	1739.62	2053.04	2094.13	1297.43	1664.73	2666.07	1632.8	2282.34	1462.95	2393.41	1756.79	1890.54	2028.18	1763.49	1625.17	1443.02	1000.67	2019.18	1507.97	1338.7	2767.5	3171.7	1866.87	2379.54	1193.7	1367.78	2062.39	1775.03	2066.32	1887.03	1367.68	1689.62	2469.86	2601.09	1386.75	2558.41	2009.21	1270.04	1923.45
HDLBP	5618.43	5294.65	5711.71	5238.34	5755.79	5732	4983.99	4132.68	4806.38	5293.61	4574.85	4552.85	6326.31	5052.91	5262.02	4487.15	5526.21	6238.44	4897.13	5443.75	5003.22	4979.01	5408.17	5175.09	5217.44	8039.17	5022.09	5772.27	5388.52	2358.65	5854.55	4644.29	5541.04	5470	5024.24	2854.19	5256.94	5711.34	6448.75	5986.27	5433.4	4958.71	5172.01	5839.68	5938.74	3448.85	5000.56	2575.76	5700.81
HEATR6	2103.96	2318.42	2261.74	2478.26	2235.92	2256.47	2387.81	1701.77	1846.73	2039.44	2131.87	2053.16	1685.63	2225.17	2235.47	1917.16	1886.26	1776.88	2064.85	1457.3	2014.79	2110.25	1855.34	1669.25	2474.89		2385.01	2123.42	2560.63	1471.45	1922.97	1840.85	2591.26	2160.35	2013.21	1896.15	2465.73	2004.4	2062.96	1752.09	2375.72	1623.6	2237.21	2105.31	2471.6	1524.71	2426.65	2092.3	1998.28
HEBP1	462.673	537.265			761.584	776.019	490.394	788.419	792.628	983.328	1191.96	999.001	1380.07	907.386	719.883	1033.34	792.259	1056.11	1033.82	1026.53	956.778	1053.47	676.04	1038.08	966.582	863.453	1152.04	1184.7	747.462	657.48	782.091		950.002	1092.66	768.655		917.286	487.448	1165	952.354	805.388	1517.79	777.166	1077.25	961.37	1138.16	1058.06		1169.24
HECTD1	3367.66	2805.36	2880.27	3041.08	3539.58	2904.23	3460.77	2926.42	2839.04	3358.08	3128.26	2572.56	3099.71	2459.94	3082.09	2631.18	2954.59	2815.26	2995.94	3275.49	2739.35	3905.92	2702.69	2612.43	3013.8	5458.55	4072.84	3220.07	3353.17	3111.8	3489.79	3112.76	2742.74	2739.78	2636.66		2616.41	2628.47	2520.26	3472.34	3014.63	1999.59	3478.06	2631.57	3092.67	2735.4	2493.93	2986.48	1973.48
HECTD3	469.246	1037.8	761.659			797.473	719.821		677.359			1008.71			1108.74			815.141	1236.95		1288.74	676.435	644.936	1292.54		844.158		622.258					592.089	904.197	1031.9	1302.65	720.157	791.039	1546.67	676.617		1125.16	906.715	587.346	1183.35		780.51		894.8
HERC1	697.982	1006.29	656.668	870.619		903.865	845.249		852.559	1130.08		1175.44	705.752	840.731	826.618	1055.38	672.508	791.046	1174.21	962.078		495.793	721.928	807.388	943.64	1223.97	640.125	1317.53	715.375	2148.96	675.938	874.152	1221.15	1167.13	1270.84		764.037	663.589	771.056	916.388	1240.61	1243.57	937.244	612.57	868.127		822	828.621	1044.89
HERC2	1308.31	1208.97	1592.58	1906.35	1561.11	1737.79	1855.19	1172	1355.74	1645.73	1498.29	1304.3	1799.49	1567.76	1415.6	1777.13	1271.19	1300.78	1368.52	1799.06	1371.34	1853.34	1623.2	1652.39	1825.17	1463.31	1703.17	1179.93	1593.44	1901.04	1648.53	1638.03	1514.36	1397.92	1737.72	1395.48	1487.81	1202.79	1687.95	1349.04	1806.49	1759.98	1770.91	1353.66	1787.87	2613.24	1460.84	2011.7	1264.09
HERC4	1764.47	1759.44	2112.73	1944.9	1856.62	1866.35	1880.82	1881.71	1836.69	2240.03	1776.94	1536.01	1536.16	1697.41	2183.8	2202.77	1521.49	1838.52	2113.98	1395.66	2073.54	2092.86	1974.41	1620.93	1853.14	1971.96	2457.72	1989.35	2106.38	1578.06	1394.56	2070.96	2058.34	2008.32	1994.47	1932.83	2463.57	1780.77	1795.03	2036.26	1977.11	2026.57	1939.03	2002.23	2068.74	1986.61	1668.76	2368.23	1762.68
HEXA	2178	1658.25	1678.31	1664.4	1813.27	1994.22	1778.06	2183.16	1833.59	2175.32	1392.78	1623.03	1782.21	2239.3	1818.98	1644.13	2048.07	2372.9	2038.65	2048.84	2315.48	1658.25	1809.61	2091.73	1553.51	1811.22	1682.55	1984.3	1806.69		2027.32	1903.27	1841.98	1814.79	1703.4	4834.7	1880.62	1953.32	1979.95	1945.5	1963.51	1792.42	1665.37	2002.08	2187.94	895.771	2222.91	1153.85	2148.58
HEXB	3335.18	2681.27			5551.32			3768.45	5279.37		5635.06		2190.64	3368.86	3479.86	6162.16	3167.98	2922.81		1250.1	4042.1	3670.3		4919.38	6631.63	5535.12		3527.98				6721.78		6202.39		11317.3			4283.15	3230.22	5596.47	3501.02		2801.64		4875.82	3242.2	7861.84
HEXIM1	172.011		254.076				113.891	276.785			328.058	253.224	262.464		305.02		324.547	484.058		456.89	174.829		223.53					465.29			937.494	420.055	445.569	129.077				314.415	373.505	314.774	127.113			184.302	404.81	146.028	417.849
HIBADH	1076.21	1104.17	1134.43	1453.49	944.712	968.111	823.823	1025.29	1170.35	1142.42	1326.57	1657.64	1342.97	1345.13	1096.98	1090.16	1389.57	1457.61	1572.03	1246.96	1185.25	1375.56	1228.02	1541.94	2442.75	914.354	1360.36	1284.76	1924.86		1526.77	1374.59	1048.76	925.935	1160.4		1440.85	1384.6	1183.97	955.057	1859.82	1355.12	1408.95	1756.31	1653.75		1093.12		1315.88
HIBCH	1046.88	1123.21	866.123	997.781	625.803	959.328	1398.47	1006.53	811.822	964.313	942.958	1188.44	999.291	939.283	1074.72	941.652	921.754	923.475	1163.9	1084.17	1113.68	1069.06	1156.65	725.999	850.141	1511.89	869.491	771.448	1225.14	1508.89	867.08	888.416	693.97	953.838	1176.03	1141.12	770.84	1112.76	1106.78	1092.95	608.749	521.037	961.949	881.25	666.695	1260.18	823.953	957.376	691.207
HID1	2831.74	2274.17	2154.68	2353.11	2292.37	2405.98	2284.24	1985.04	2395.44	2448.66	2653.23	2203.17	2434.92	2467.06	2212.7	2034.95	2798.62	2548.52	2137.13	2609.13	2324.59	2291.05	2262.37	2603.32	2214.66	1452.06	2095.94	2585.27	2554.69	1140.75	2481.87	1701	1972.69	2232.69	2370.96	1271.76	2816.7	2029.8	2555.35	2618.64	2143.47	2247.08	2313.32	2755.12	2260.01	1181.4	2238.27	1245.62	2674.94
HIF1AN	902.304	1015.63	1197.56	1278.64	1200.01	1041.24	1126.96	882.497	904.366	1237.69	1278.31	1181.3	938.483	1091.15	888.013	1124.88	970.771	510.978	869.424	850.397	851.888	1010.28	1246.23	949.308	1091.08	910.9	900.116	836.667	1414.21	1304.66	1010.99	1325.22	1101.95	1068.73	1033.68	1697.89	952.585	1085.02	921.422	1007.63	852.87	1094	957.152	976.092	890.846	1591.1	1104.7	822.101	905.281
HIKESHI	7324.88	6554.48	7737.7	8246.75	8707.9	7273.58	7988.52	6610.63	9752.71	8498.97	8368.96	8491.26	9617.75	7134.82	7293.98	8939.13	7437.35	7151.72	9337.25	6429.16	7211.55	8386.88	6294.88	7218.14	8676.54	7591.18	9075.14	8146.09	7367.16	7128.99	7010.2	6919.5	6418.17	6314.47	9042.17	8768.8	7441.68	7074.52	7935.34	6582.71	8369.19	9980.75	8198.69	7949.32	7421.85	10942.2	7167.6	8695.79	6469.53
HINT1	1485.24	1868.12	1125.1	1837.41	1348.78	1244.22	1409.45	2395.68	1171.9	1998.88	1948.23	2012.1	1650.37	1971.93	2144.01	1992.96	1847.64	2013.74	1802.65	1446.09	3396.17	1917.79	2166.58	2054.13	1948.29	1767.33	1447.73	1940.91	1695.58	1585.5	1436.52	1344.14	1946.89	1967.99	1811.9	2061.16	1916.13	1982.57	2466.3	2575.77	1544.79	1962.13	1276.4	1846.26	1227.53	1744.29	1549.87	1543.48	1923.5
HINT2	1144.54	1061.2	740.289	662.596	758.459	908.351	731.172	1734.16	1014.77	1028.38	991.657	788.368	863.107	651.773	1138	1210.9	1032.38	1184.85	1059.11	807.966	1456.53	1152.26	1543.25	1087	1005.7	1261.56	1027.32	1224.83	866.097	1475.64	1149.36	1800.88	1124.94	1266.28	895.397	1438.72	1128.64	916.767	1623.02	1159.87	1281.91	1180.21	1712.96	1323.09	1032.83	1241.83	878.281	1074.9	1091.11
HIP1R	606.847		741.403	497.506	585.336	658.468	570.354	836.226		717.533		418.827	816.203	414.084	707.333		374.349	745.967		577.374	624.273	812.672	387.19	594.682		4560.1		1177.76			605.042					1064.01	731.862	618.283	666.317	367.988		555.287	661.973	481.133	429.762		743.196		877.863
HK1	8191.02	8781.39	8013.64	8815.91	7646.52	7948.32	7820.22	7811.77	8934.04	7981.89	7642.97	8997.78	8963.85	8670.46	8315.07	8068.2	9475.5	8528.12	8801.59	8094.13	7530.44	8236.17	7843.56	8497.51	7945.55	11163.1	8163.32	8252.47	9120.64	7074.94	8393.48	9184.55	8720.97	7903.63	9049.12	8601.09	8474.39	8732.6	7404.58	9416.09	8380.38	8778.19	8400.28	8749.48	8825.73	7813.07	8040.51	7592.61	7822.71
HK2	1757.32	1383.42	1946.69	1513.63	1699.57	1652.04	1607.91	1600.78	1344.9	1263.89	1429.04	1551.68	1620.54	1567.03	1871.37	1592.2	1747.08	1749.79	1998.85	1447.33	1507.89	1307.91	1572.28	1359.18	1635.59	3646.89	1640.48	1545.53	1370.89	1127.1	1894.03	2024.09	1651.54	1637.78	1702.59	1486.2	1373.47	1543.39	1363.83	1746.65	1477.6	1628.02	1619.69	1909.85	1272.31	1268.6	1455.93	1304.88	1461.7
HK3											450.832															2363.38
HLA-A		347.092		588.189	306.713	355.027		1040.77	217.963	862.927	642.117	568.594		361.395	723.786	655.471	676.901	269.047	665.176	630.637		698.13		237.476	858.826	2343.32	529.749	730.679	434.835	604.732	571.896	741.395	720.204	736.922			265.517	520.178		587.18	626.789	1120.12		581.251	474.966	339.212	222.663	365.64	717.661
HLA-C	939.426	806.509	705.992	844.656	694.999	961.713	1045.7	844.049	873.438	901.706	527.54	961.944	974.763	1029.23	828.423	727.301	617.329	838.279	922.94	982.643	1012.02	1281.68	807.106	839.127	685.057	719.825	894.376	855.816		1024.17	791.891		867.347	927.436	717.808	615.052	875.704	1136	1094.18	1092.64	735.181	856.595	821.887	687.739	663.992	491.719	463.903	1370.69	902.711
HLTF	3353.7	3174.07	2685.15	3004.44	3397.68	2826.83	2615.76	2539.43	2312.83	3107.73	2755.7	2802.98	2986.73	2967.35	3234.24	2975.64	3297.41	2711.17	2990.64	3190.57	3033.83	2985.16	3460.29	2853.83	2433.31		2414.2	3651.97	3174.72	2180.48	3176.74	2505.31	3232.28	3276.35	3245.95	2808.19	3248.87	2861.55	3500.77	3247.74	3392.82	2861.21	2580.95	2588.42	2921.07	3650.42	2654.43	2563.99	3002.58
HM13	2057.49	2477.31	2374.28	3100.72	2062.99	2833.96	1930.25	2808.44	1975.94	2095.84	2859.79	3120.88	3003.48	2796.15	2850.44	2340.19	2025.4	3060.44	3055.08	1749.56	2313.39	2910.21	2838.59	3248.11	3125.1		2217.51	2819.35	2732.16	2989.56	3069.56	2344.95	4022.47	3069.53	2312.26	2333.84	3325.14	2636.36	3977.14	2685.81	2948.08	2202.51	2701.33	2567.35	2647.27	2535.85	3435.95	3189.89	3362.63
HMBS	2342.41	2093.04	1942.4	2500.92	1910.7	2206.72	2037.61	2704.74	2060.27	2417.14	2188.65	2309.65	2319.4	2293.98	2296.2	2416.4	2412.85	2233.28	2395.01	2282.2	2634.68	2171.46	2816.91	2341.64	2543.96	1376.74	2177.51	1837.26	2306.39	1282.76	2410.19	2509	2525.58	2722.95	2220.38	1970.97	2635.31	2866.31	2338.55	2948.31	2093.32	2153	2403.25	2581.64	2883.3	2412.52	2672.53	1678.04	3107.32
HMCES	2825.77	3221.17	2516.71	2908.43	2708.93	2523.69	2586.22	3659.13	2549.67	2278.6	2482.1	3593.83	2781.47	2630.34	3097.74	2671.02	3398.19	2831.22	3171.33	2498.82	2898.66	3041.37	3144.5	2747.98	3199.88	2167.41	2443.31	2649.56	2224.12	3486.83	2785.73	2630.15	2722.53	3155.52	2478.09	2240.1	3398.76	3129.89	3001.27	3120.82	2586.35	3156.55	2976.29	2694.02	2713.35	2132.92	2773.88	2291.45	2903.24
HMGB3	941.758	387.251							674.122			758.541	574.279	799.09	687.536		846.184	959.981			817.053	823.705			1141.32	1897.2	648.242	869.77	997.264		1384.87	702.495				992.855	900.055		795.597			888.465	631.064	696.358	510.664		947.726		703.625
HMGCS1	3069.79	2700.17	2467.95	3496.21	3242.86	2305.46	2796.57	3834.97	2966.95	2886.2	2892.19	2732.76	2495.36	2009.77	2503.4	3216.82	3080.43	2692.28	2320.11	2642.95	2881.69	1948.56	3187.08	2611.81	2937.26	8976.76	2485.43	2280.15	3155.97	2499.56	1925.14	2331.07	2447.36	2677.68	2860.67	2163.7	2457.75	2631.13	2498	2505.87	2936.14	2273.64	2646.08	2402.63	2428.7	2757.93	2249.2	1507.15	2802.26
HMOX1		609.944	284.988														382.06				552.305					10798.8										2203.49
HNRNPA0	3589.48	4416.72	4448.47	4405.05	4426.35	4436.27	4195.09	4542.13	4517.91	4334.13	5725.8	4486.67	3820.3	4470.19	5237.29	4383.86	4168.53	3973.6	4398.12	4077.1	4603.39	4215.67	3993.95	4597.44	3426.59	3644.98	4079.29	4160.01	3940.05	4191.31	2749.48	4603.28	3606.27	4069.09	4230.57	4299.39	3691	3870.94	4328.99	4414.81	4245.07	4941.24	4017.95	2963.44	3688.81	5126.3	3689.13	5177.05	3859.27
[truncated: 2,063 more rows]
[truncated: 43 more columns]

## Sheet: DUBS
Genes	compound_01_a	compound_01_b	compound_02_a	compound_02_b_	compound_03_a_	compound_03_b_	compound_04_a_	compound_04_b_	compound_05_a_	compound_05_b_	compound_06_a_	compound_06_b_	compound_07_a_	compound_07_b_	compound_08_a_	compound_08_b_	compound_09_a_	compound_09_b_	compound_10_a_	compound_10_b_	compound_11_a_	compound_11_b_	compound_12_a_	compound_12_b_	compound_13_a_	compound_13_b_	compound_14_a_	compound_14_b_	compound_15_a_	compound_15_b_	compound_16_a_	compound_16_b_	compound_17_a_	compound_17_b_	compound_18_a_	compound_18_b_	compound_19_a_	compound_19_b_	compound_20_a_	compound_20_b_	compound_21_a_	compound_21_b_	compound_22_a_	compound_22_b_	compound_23_a_	compound_23_b_	compound_24_a_	compound_24_b_	compound_25_a_
[truncated: 55 more rows]
[truncated: 43 more columns]
