# Supplementary material
Source: Research Square preprint supplement (doi:10.21203/rs.3.rs-9106698/v1)
Supplement: Supplementary file 1 [file 57d50b5d7e64c1fec2c127a7.pdf]

# Uncropped blots for Figure 2B

IB: USP7

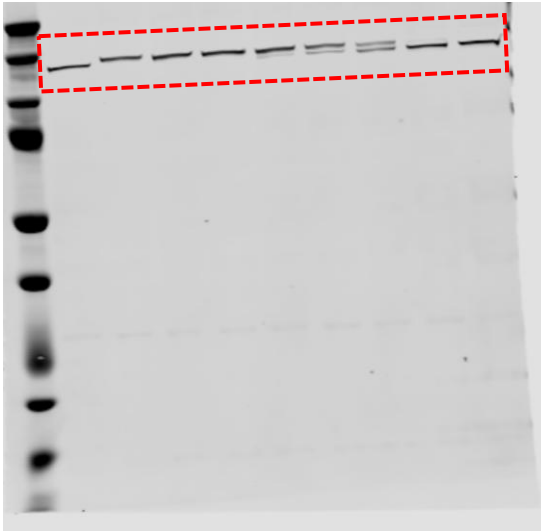

IB: USP47

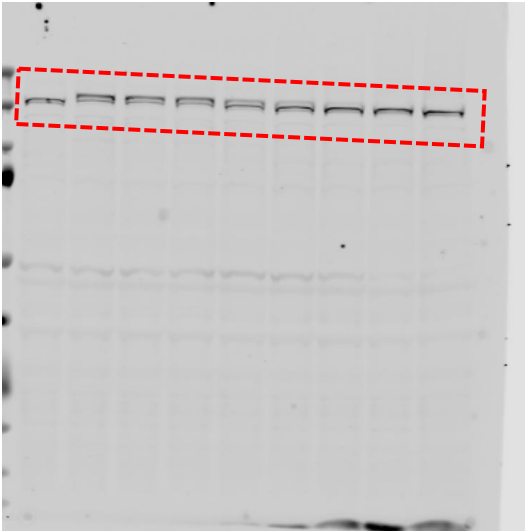

IB:  $\beta$ -actin

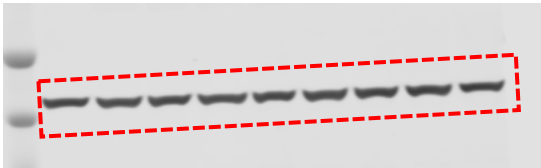

IB:  $\beta$ -actin

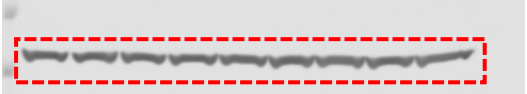

IB: OTUD7B

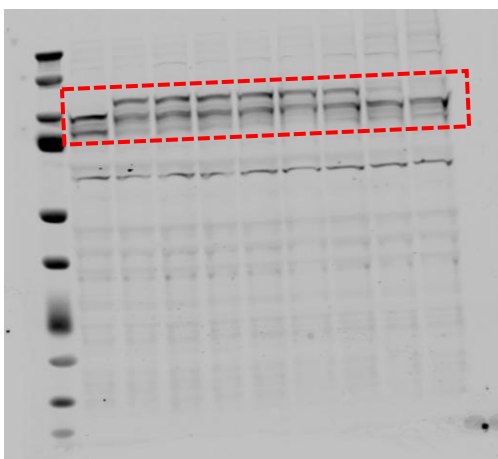

IB: USP5

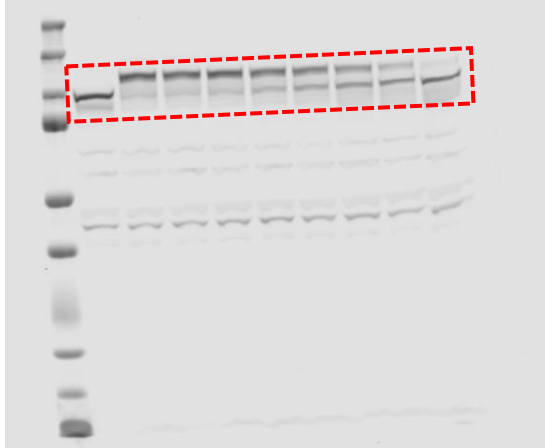

IB:  $\beta$ -actin

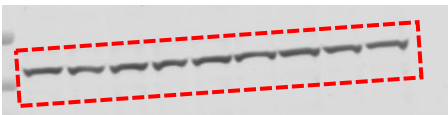

IB:  $\beta$ -actin

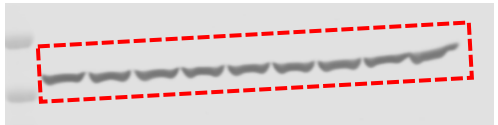

*\*IB: immunoblot*

# Uncropped blots for Figure 4A

IB: USP47

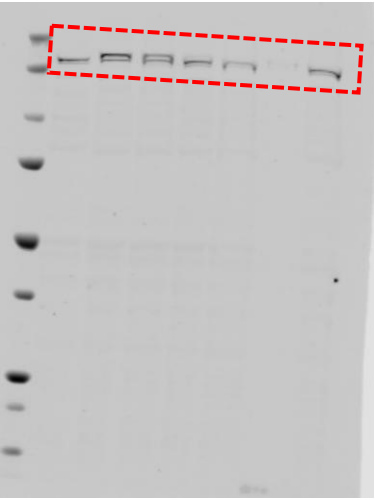

IB: USP7

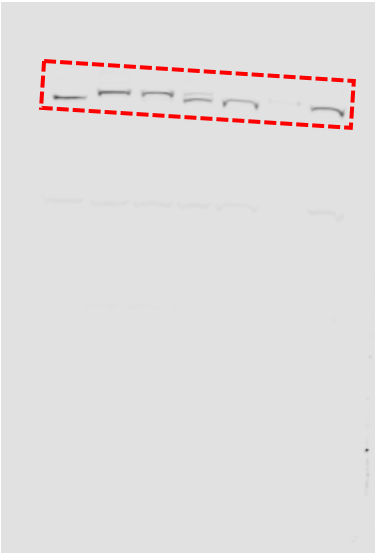

IB: CFL1

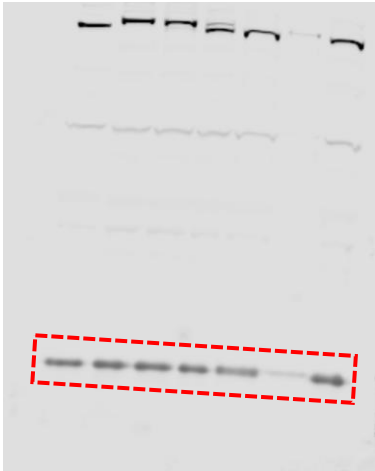

# Uncropped blots for Figure 4C

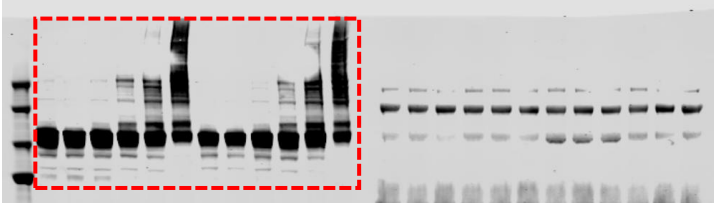

NLRP3

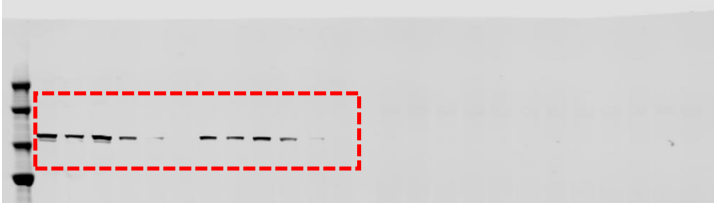

NLRP3  
(short exposure)

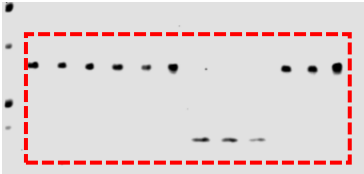

Casp-1

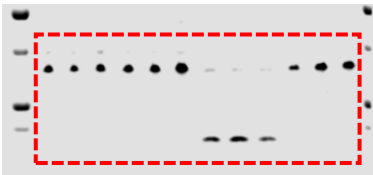

IL-1b

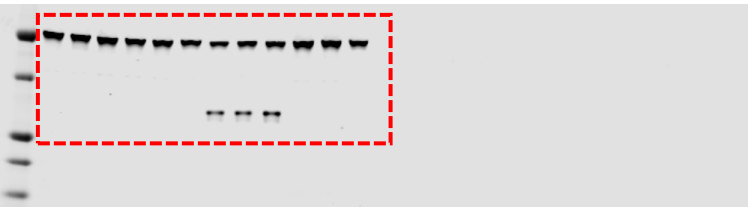

GSDMD

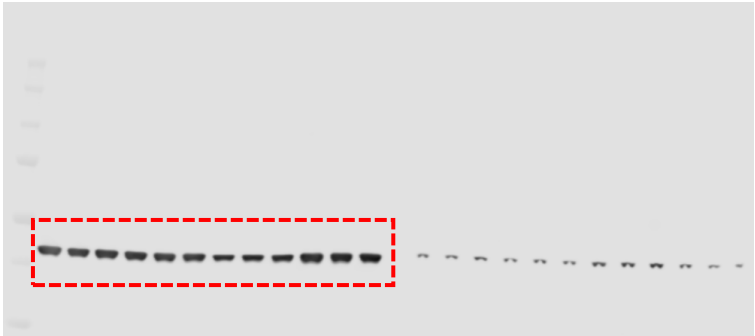

$\beta$ -actin

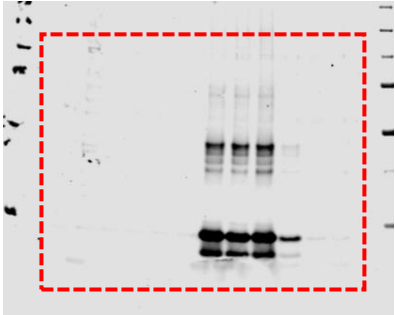

ASC

# Uncropped blots for Figure 5D

IB: OTUD7B

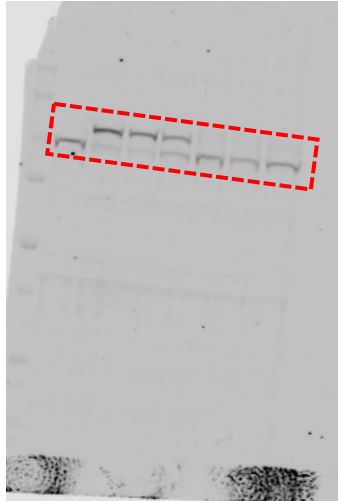

IB: CFL1

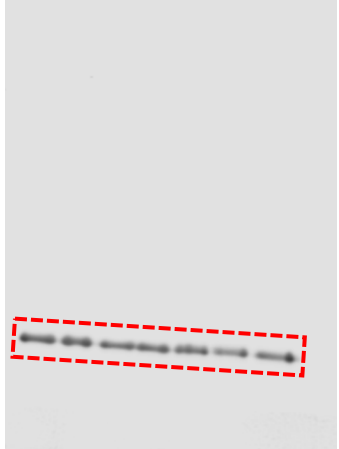

# Uncropped blots for Figure 5E

IB: HIF-1α low

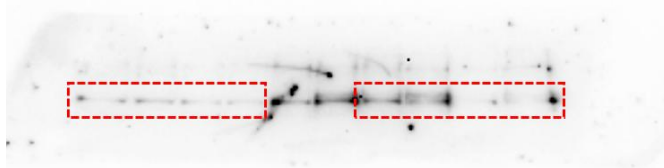

IB: β-actin

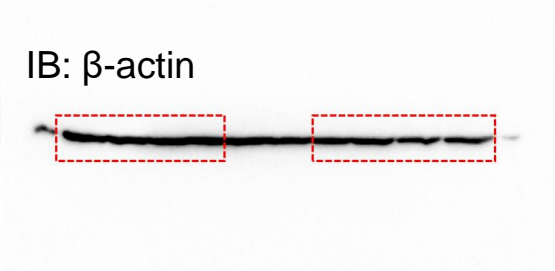

IB: HIF-1α High

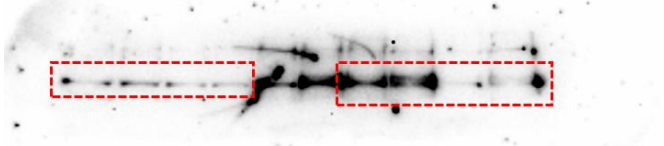

# Uncropped blots for Figure 5F

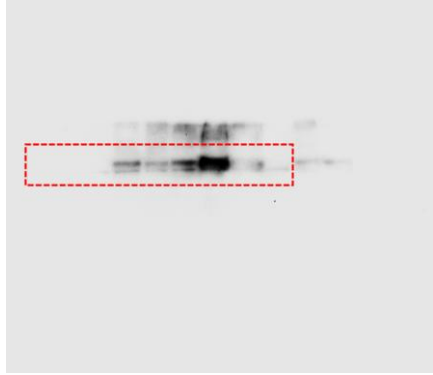

IB: HIF-1α

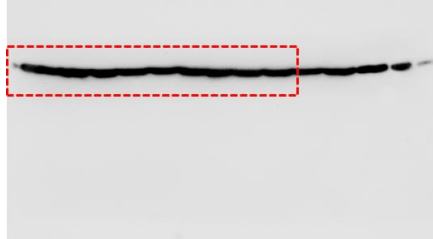

IB: β-actin

# Uncropped blots for Figure 5G

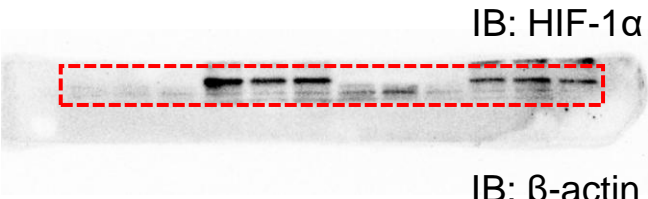

IB: HIF-1α

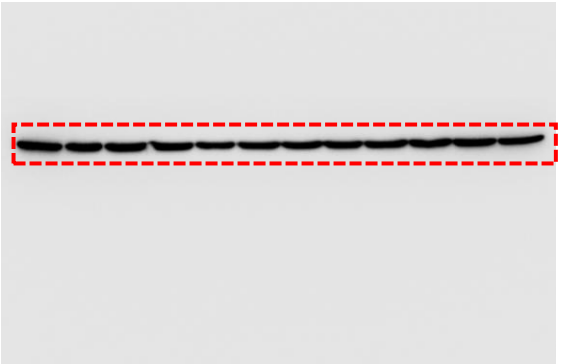

IB: β-actin

# Uncropped blots for Figure 6A

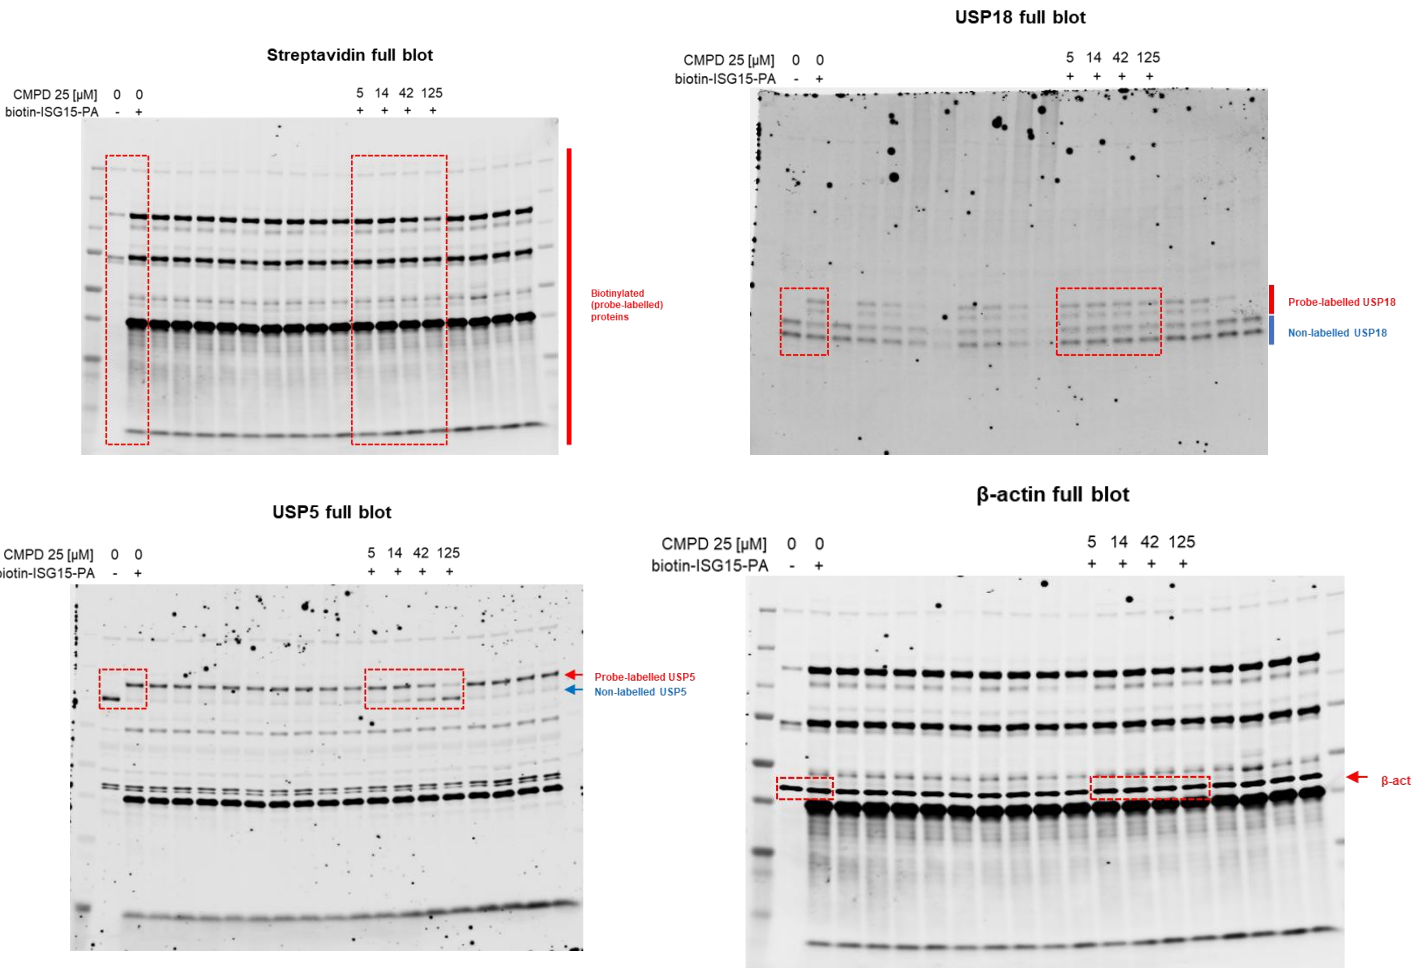

# Uncropped blots for Figure 6B

IB: USP5 (HA-Ub-PA)

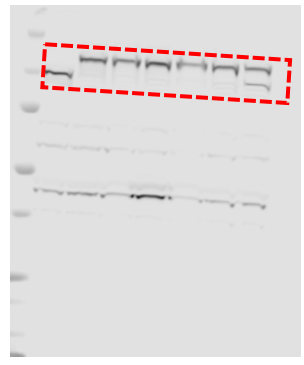

IB: CFL1

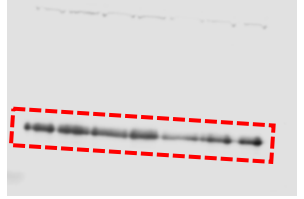

IB: USP5 (ISG15-PA)

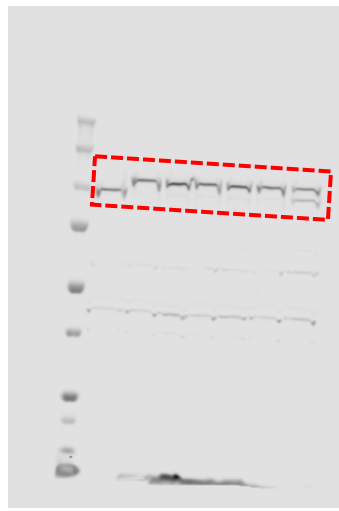

IB: CFL1

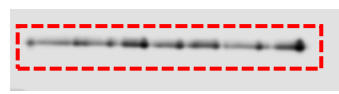

# Uncropped blots for Figure 6D

IB: USP5

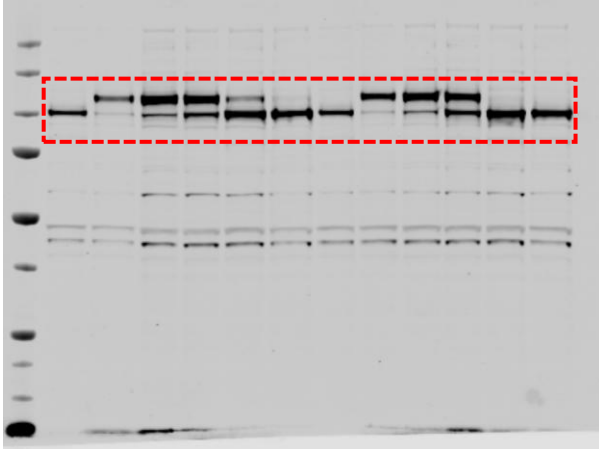

IB:  $\beta$ -actin

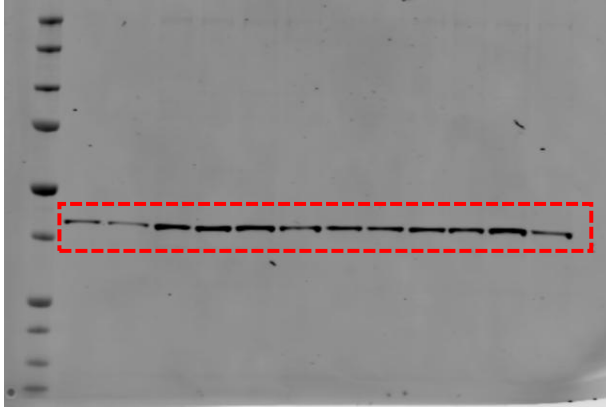

# Uncropped blots for Figure 6E and S7D

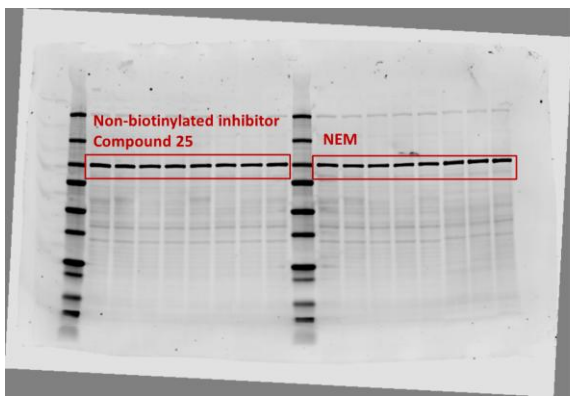

USP5

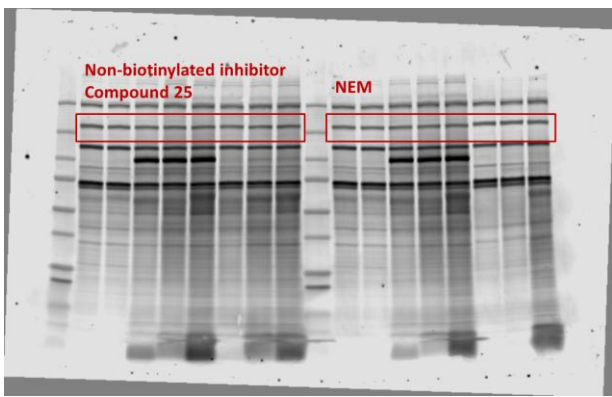

USP42

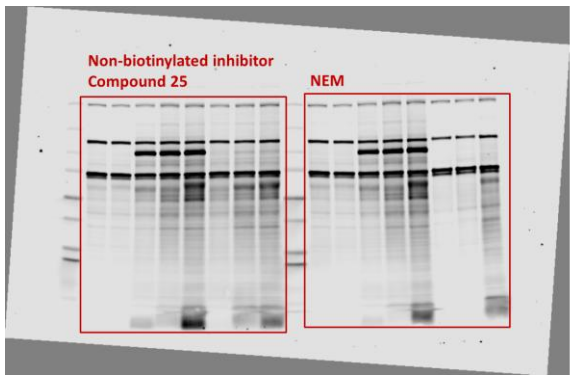

Streptavidin

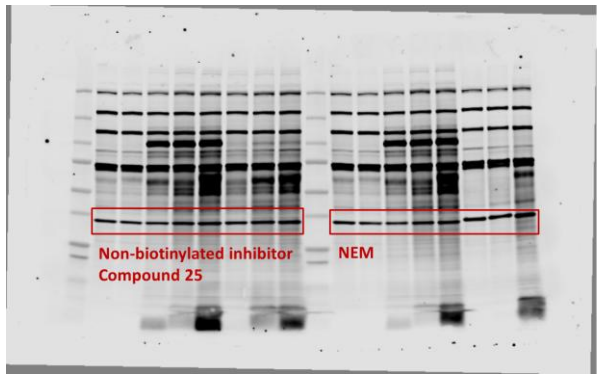

GAPDH

### Uncropped blots for Figure S2D

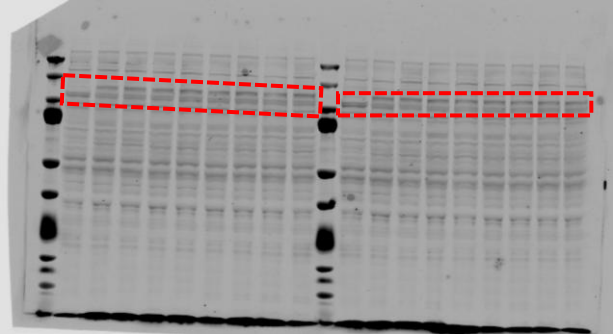

IB: USP33

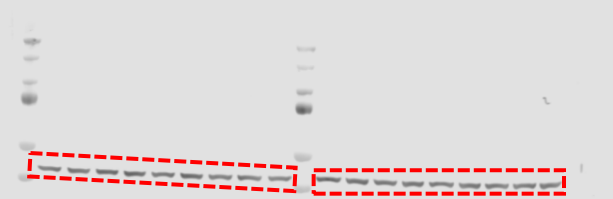

IB: CFL1

### Uncropped blots for Figure S2F

IB: USP47

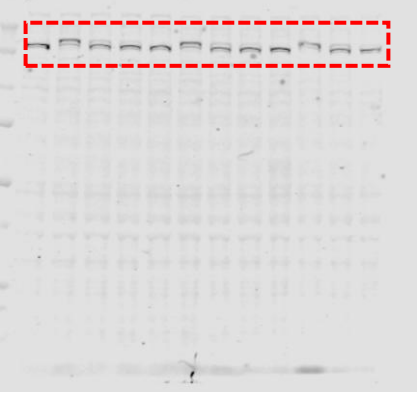

IB: USP7

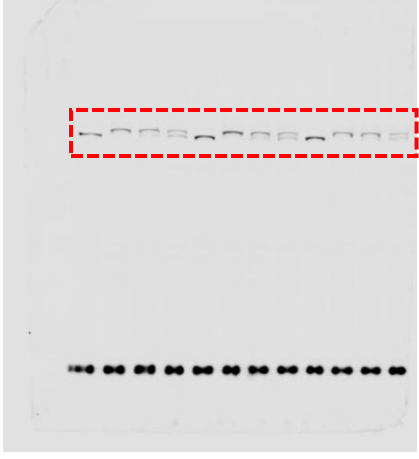

IB: CFL1

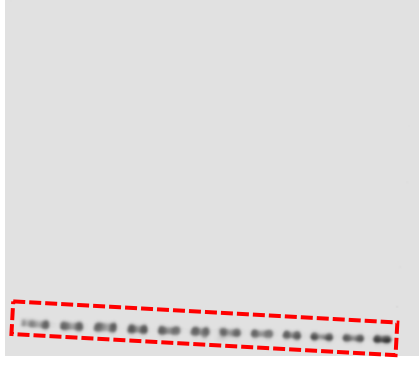

### Uncropped blots for Figure S2G

IB: OTUD7B

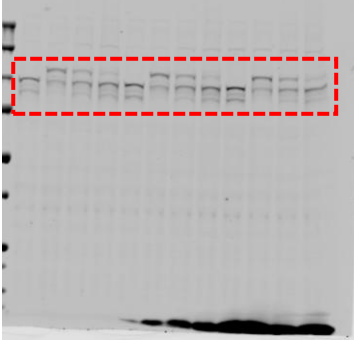

IB: CFL1

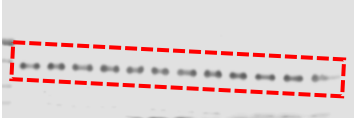

### Uncropped blots for Figure S2H

IB: USP5

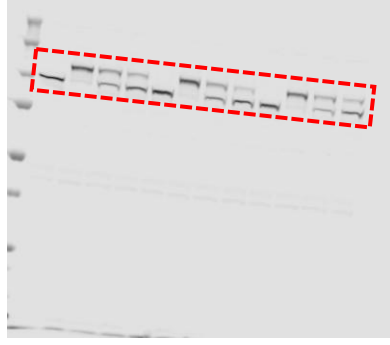

IB: CFL1

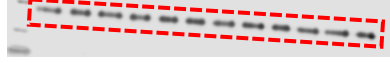

# Uncropped blots for Figure S2E

IB: VCPIP1

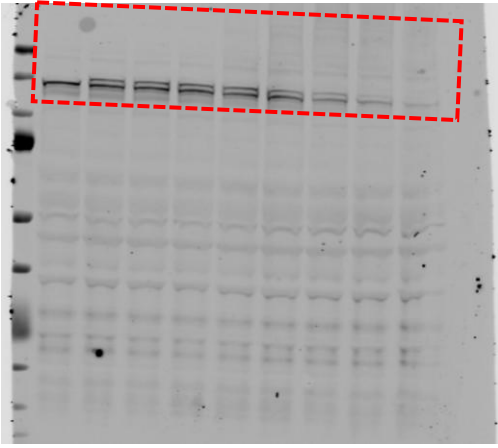

IB: USP30

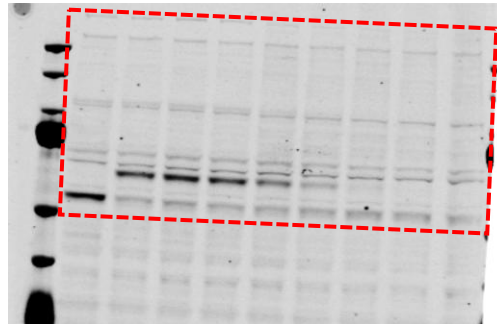

IB:  $\beta$ -actin

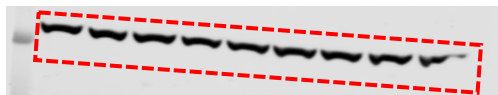

IB:  $\beta$ -actin

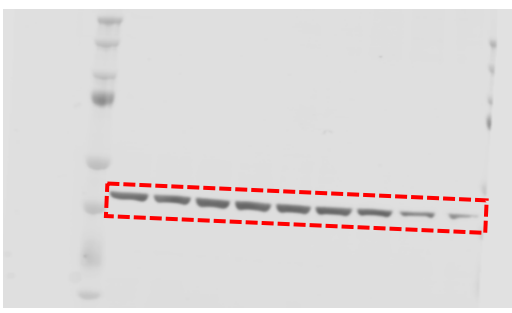

# Uncropped blots for Figure S6

IB: USP5

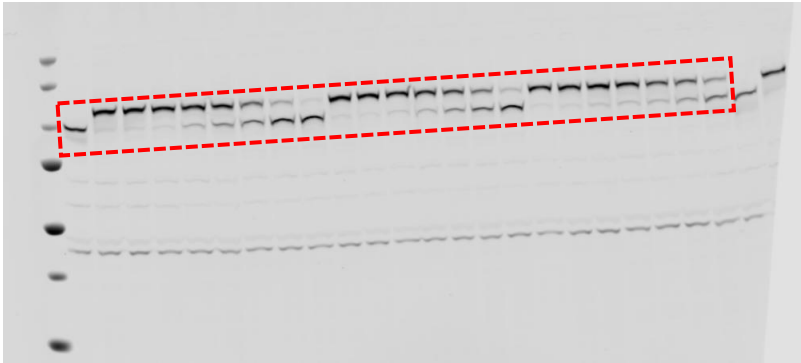

IB: Anti-HA

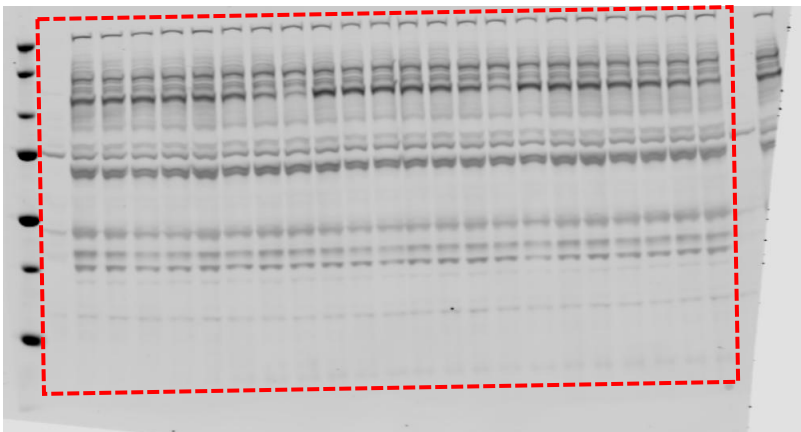

IB:  $\beta$ -actin

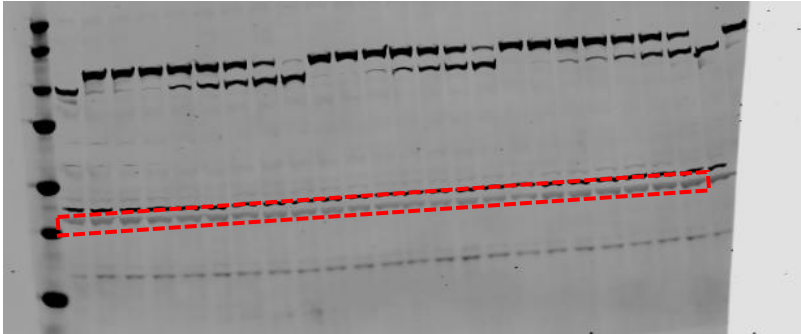

# Uncropped blots for Figure S7B

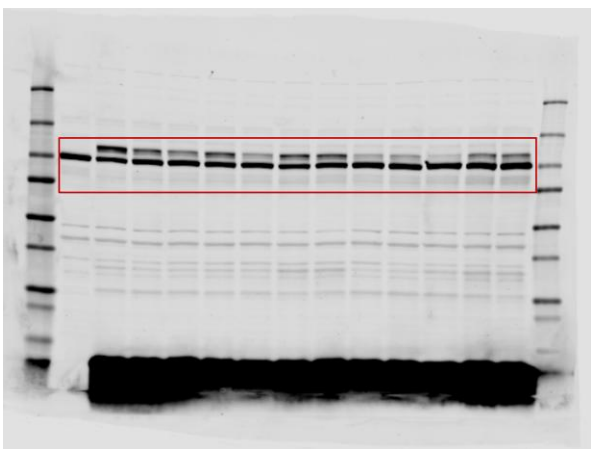

USP5

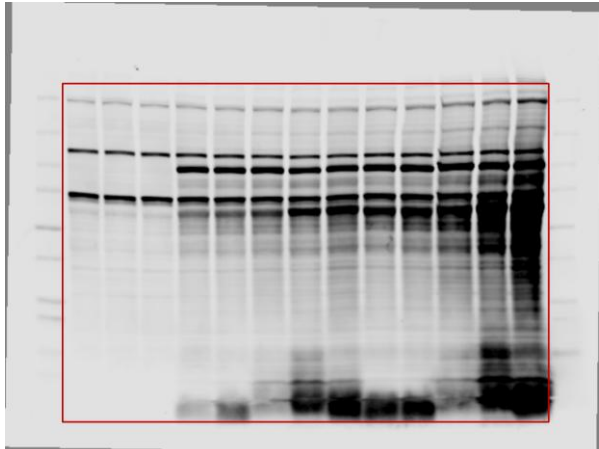

Streptavidin

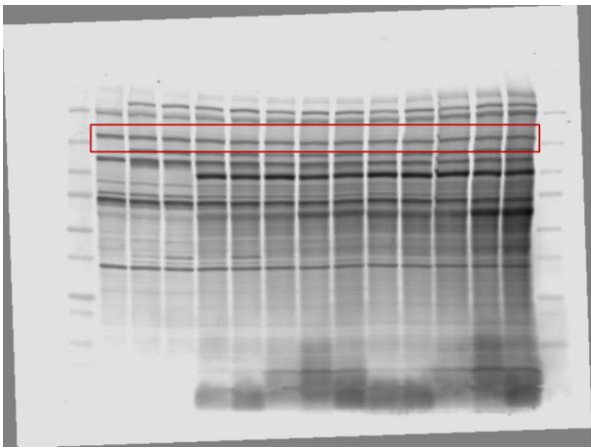

USP42

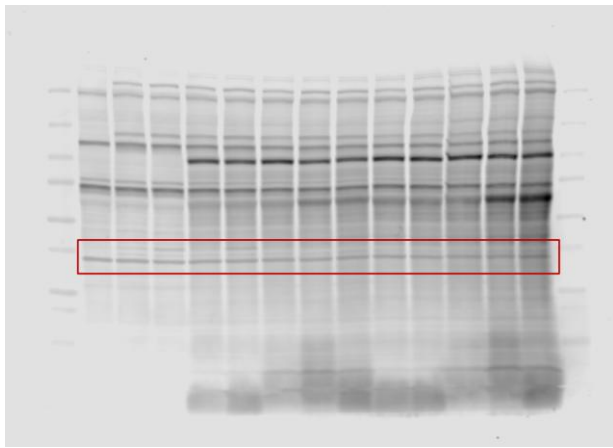

GAPDH
