# Supplementary material
Source: Research Square preprint supplement (doi:10.21203/rs.3.rs-9106698/v1)
Supplement: Supplementary file 2 [file 3a9a4a947e2fd6966868a428.xlsx]

## Sheet: report.unique_genes_matrix
Genes	3 1 [µM] a	3 1 [µM] b	3 10 [µM] a	3 10 [µM] b	3 50 [µM] a	3 50 [µM] b	3 100 [µM] a	3 100 [µM] b	3 250 [µM] a	3 250 [µM] b	6 1 [µM] a	6 1 [µM] b	6 10 [µM] a	6 10 [µM] b	6 50 [µM] a	6 50 [µM] b	6 100 [µM] a	6 100 [µM] b	6 250 [µM] a	6 250 [µM] b	25 1 [µM] a	25 1 [µM] b	25 10 [µM] a	25 10 [µM] b	25 50 [µM] a	25 50 [µM] b	25 100 [µM] a	25 100 [µM] b	25 250 [µM] a	25 250 [µM] b	Negative control (no HA-Ub-PA)	Negative control (no HA-Ub-PA)	Negative control (no HA-Ub-PA)	Positive control (HA-Ub-PA)	Positive control (HA-Ub-PA)	Positive control (HA-Ub-PA)
AACS	2944.26	3637.46	2975.06	3935.53	2597.3	2972.55	3310.02	3182.38	3064.78	2681.42	2644.15	3370.69	2696.81	2566.73	3879.47	4135.94	3353.91	3535.16	3176.2	3355.58	3494.73	3046.63	3290.87	3124.97	3185.1	2617.73	3023.16	3592.76	2860.69	3939.29	2590.54	3320.06	3097.4	2805.14	3574.99	2468.94
AAGAB	560.136	675.544			519.592	529.422	688.586	638.891	727.279		558.381	659.669	468.596	1071.11	578.511			252.894			487.757	491.209	574.945	717.046	728.009		321.928				567.717	540.981	843.658	752.113
AARS1	24311.7	20577.4	20837.8	19866.1	22932.7	20936.2	23501.5	22114.7	22872	17448.4	22916.4	21372.9	22354.3	19592.7	21835.9	19940.3	21628.3	20627.4	22257.1	21243.9	21758.2	19071.3	21154.4	19753.9	21744.7	21026.4	18690.7	18310.8	22844.9	16147.6	23631.3	22767.1	20480.2	20130.6	15989.4	20915
AARS2	2025.06	1448.87	2491.46	2297.03	2563.13	2231.68	1940.16	2048.3	2398.33	2302.37	1852.44	2896.89	1994.74	1668.52	1832.07	3085.19	1849.93	1648.94	1885.51	2614.56	1752.34	1645.21	1966.03	2605.85	2067.32	1889.77	2034.1	1425.93	2271.52	3401.7	2220.4	1471.27	1472.12	1644.98	1869.42	1928.62
AARSD1	875.989	478.179	1282.57	656.81	1167.17	742.75	1060.6	618.72	821.383	865.376	693.875	784.05	308.051	1079.28	996.185	924.026	767.065	554.836	472.687	899.057	850.087	966.132	1187.41	920.959	704.908	1251.26	708.56	883.073	895.264	2054.99	1005.64	914.362	749.412	885.394	810.093	595.166
ABCA12	1943.19		1854.63		1777.39	1411.1		1360.8				1911.24		2374.71				1034.98	1237.3	2452.95		2238.93	2201.18			2271.89	2864.04	2464.29	1931.3	1747.78		2074.11		834.938
ABCB6	3112.05	2415.69	4527.12	1794.44	1167.57	2333.22	2466.94	2666.62	3018.86	2983.65	2912.78	1082.14	2228.75	1884.84	2084.8	640.726	2249.52	2166.09	2503.84	1073.41	2206.41	2446.32	2086.01	1838.69	1468.95	2867.52	2180.44	2569.3	1947.4		2734.2	2015.45	2073.28	2840.52	2510.67	1990.48
ABCC5	1715.06	1208.69		1745.66		718.264	1292.64	1462.91	1502.46	1235.51	1282.78	1532.22	1297.4	1720.23	1891.97	1731.68	1649.92	1999.29	1977.01	1467.34	1368.51	1389.48	1802.05	1156.74	1340.52	1792.69	1506.62	1479.14	1113.43		1749.75	1520.12		1329.75	999.056	1870.61
ABCD1	819.191	816.341	555.604	707.961	1111.52	1186.24	622.249	925.049	599.731	1170.45	469.946	784.73	809.303	832.353	672.843	639.845	751.175	804.019	1081.78	989.207	789.298	880.642	1038.69	666.72	1090.08	831.68	782.005	812.795	781.632	1517.02	898.436	687.049	768.564	720.574	1056.67	914.43
ABCD3	1820.1	2079.24	1815.91	2469.23	1532.32	1532.84	1440.35	1825.3	1847.75	1742.38	1788.93	581.145	2136.09	1838.49	2311.23	1067.75	1697.38	1834.83	2157.34	1008.74	2544.55	2523.47	2345.59	2248.8	1631.5	2261.08	2053.39	2136.97	1083.59		2237.78	1276.01	1714.66	1828.35	2023.08	1823.04
ABCE1	10094.6	9333.8	7594.23	9920.92	7610.13	11105.6	11041	10690	10272.7	10759.1	10906.7	8121.57	9373.01	9047.25	8602.52	9443.1	9384.72	9953.24	8009.27	8781.66	10870.4	8514.98	10643.5	8197.02	9922.37	7354.32	8787.07	8235.85	9068.37	5935.68	9079.53	9259.09	8793.03	11353.3	9863.82	8462.58
ABCF1	11454.3	9612.36	11568.7	9502.3	10335.6	7433.42	11242.4	8611.24	9016.06	9267.03	10944.5	10786.5	11050.9	10356.4	9911.75	10805.9	9475.64	10885.1	10691.4	9831.96	10373.4	8906.45	10657.4	9816.65	11906.3	10784.2	11167	11481.7	10628.9	10387.8	8290.43	9301.05	10344.3	11261.7	9242.91	11171.8
ABCF2	7273.26	5753.12	8310.77	6797.63	6725.94	4732.19	5462.72	4397.9	6274.27	3863.05	5780.51	5314.58	5786.05	5558.39	4932.77	4243.21	4873.98	4982.49	7073.93	5649.19	6708.09	6422.48	7946.55	7829.42	6101.57	6213.43	5645.74	5537.94	7064.37	7601.97	6364.66	4923.44	5939.04	6447.3	5312.57	7495.46
ABCF3	5473.92	5925.76	4626.58	6170.67	3015	5945.15	6541.77	5821.18	6326.99	4279.7	5946.07	3015.57	5077.77	7033.34	5729.88	3456.85	6277.79	6457.27	5934.39	3665.9	6018.14	6273.99	6231.63	4448.48	6365.12	5238.05	6697.62	6347.52	5100.41	4608.73	6105.23	5886.37	5845.13	5003.18	6207.13	7176.87
ABHD10	2969.05	3218.04	1800.44	2758.79	2143.65	4306.26	3746.14	2951.19	2601.24	4093.99	3028.05	2376.96	2968.28	2748.6	3413.2	2018.2	3397.89	3078.23	2127.74	2431.16	3246.91	2741.52	2316.52	2071.33	1960.58	3028.96	3336.39	2748.33	2110.87	1624.67	3007.51	2235.62	2502.99	3722.72	3701.47	3049.63
ABHD11	2680.08	4156.94	3885.37	1696.83	4267.59	2308.25	2363.28	3556.54	3039.32	3464.57	2869.72	4925.31	2663.07	2625.81	3316.51	3871.83	2461.55	2691.18	3267.88	4143.88	3803.75	3433.47	6843.94	4067.26	2898.68	3296.54	2819.77	3616.87	2605.63	4992.9	3993.29	3152.83	2557.97	2682.87	1842.79	3555.74
ABHD14B	1368.96	1780.57				1593.5	2378.78	1300.93	1281.85		1102.18	1070.36	1842.68	1714.2	1446.24	1117.62	1894.79	2425.39	1843.8	1153.38	3184.54	2956.61	1799.37	1310	1514.76	1498.47	1394.56	2495.72	1065.89		1533.55	1282.79	2887.74	1482.67	1949.23	1215.94
ABHD16A	1921.2	2046.01	2131.65	1889.52	2091.14	1630.83	1898.03	1926.37	1514.6	1211.09	1558.46	2035.23	2190.1	2075.48	1868.83	1664.14	2186.25	1947.8	2514.71	1697.34	2090.08	1894.46	2328.49	2166.09	1924.52	1474.06	1535.27	1835.9	1717.31	2565.03	2356.16	1960.09	2015.3	1791.67	1983.85	2050.11
ABI1	1134.86	1110.08	999.403		1633.11		1008.71	1222.1	1384.17		1743.66	2328.97	1744.12	589.243	1944.57	1572.61	1463.74	1104.87		1342.99	510.558	1202.43	841.611	1135.31	1377.34		928.981		1394.57		1021.38	1395.39	2021.47	1609.03	1268.6	955.074
ABR	1041.04	1403.43	499.799	1032.73	574.179	712.949	1070.99	968.974	950.872	761.491	1040.04	585.079	760.18	1300.57	789.156		943.492	1575.57	1033.74	1074.11	808.782	1162.24	901.356		1180.86	1227.93	1129.33	1115.72	1104.21		1309.43	1593.84	1011.6	1032.65	1100.14	822.057
ABRAXAS2	1093.88	1157.3	1096.61	1409.43	2475.04	1820.17	1022.68	1278.24	1161.04	1718.1	1298.39	1272.97	1149.68	1011.1	1174.46	1270.32	1355.33	1018.54	1106.57	1132.29	937.459	883.043	1297.19	1426.14	1093.23	1084.56	1394.81	1257.95	953.187		1335.16	872.315	1174.58	991.643	1265.39	740.49
ACAA1	1475.51	1818.01	1399.88	1927.9	1609.71	1179.87	1484.1	1698.56	1788.98	953.277	1655.28	1686.62	1846.53	1555.93	1468.76	1375.04	1060.21	1936.82	2110.19	1847.98	2328.78	2063.54	2139.01	2128.8	2017.06	1925.25	1749.41	1720.69	1145.68	1679.59	1332.77	1669.04	1644.36	1606.4	1031.5	1550.06
ACAA2	20486.6	23144.3	17053.8	22184.5	17588.3	21275.7	21228.6	21499.4	21174.9	26164.9	18750.1	17920.3	19242.4	19542.3	20523.6	17477.6	18820.1	17613.6	18801.6	17300.3	17952.1	20194.3	17421.2	18043.4	19784.7	22257.6	18526.2	21877.1	19806.6	17741.9	22235.4	20439.6	17561.3	20861.9	23112.9	19341.7
ACACA	4068.66	3913.86	4627.65	3536.71	4040.12	3799.24	4197.69	4219.82	4484.17	4102.12	4592.03	4484.5	4067.57	3419.4	4500.38	3742.75	3955.99	3526.63	4289.93	3633.71	4486.78	3786.96	3884.82	3731.69	4178.93	3894.5	3913.04	3950.61	4171.38	4083.81	3771.04	3175	3326.75	4765.68	3657.92	3928.8
ACAD8	1389.61	2076.5	2214.24	2553.55	1330.43	2115.96	1755.61	1767.12	881.086	2804.94	1515.48	999.984	1892.27	1086.57	1428.36	1377.39	1065.42	1174.72	1483.81	1304.74	1588.64	1426.75	1630.63	1364.61	1652.56	1538.98	1891.75	1290.41	1311.28		1458.35	1146.6	1687.33	752.421	1309.26	1401.5
ACAD9	4085.25	3472.69	3125.19	3528.95	3550.48	3834.88	4192.35	3791.82	3587.43	3114.92	2871.74	3465.37	2947.35	2991.89	2737.43	2377.95	3764.12	3065.95	2757.55	3021.02	3077.99	2641.01	3231.43	2927.49	2931.28	3599.43	2891.81	3383.87	3676.28	2684.48	2868.59	3339.54	3375.45	3245.26	3173.23	2815.75
ACADM	4908.65	5303.63	6326.35	5648.76	5671.9	5530.65	5688.21	4168.37	4416.52	6801.21	4768	3818.82	5325.65	3868.01	5859.57	4567.17	5395.8	4631.39	5304.45	6060.81	4488.81	5179.38	4655.53	5290.75	4831.99	5070.17	4427.14	5566.52	5477	4608.13	4789.19	5168.93	4882.06	5283.2	5706.07	4726.47
ACADSB	3529.89	2992.08	3142.78	4245.08	3426.37	4101.05	3436.37	3218.19	4427.35	3692.57	3840	1874.78	3142.29	3038.43	3311.69	1538.84	3280.12	3066.07	2708.82	1581.15	2803.55	2768.64	3076.84	2891.1	2689.55	3167.9	3306.8	3487.23	3494.14	2614.37	2944.24	3204.38	3336.13	2916.53	3125.06	2966.77
ACADVL	1526.33	2027.12	3231.41	2576.42	1790.01	2440.8	2393.85	2843.44	2749.84	2424.59	1907	1333.96	2118.58	1673.8	2852.94	1362.99	2506.79	2535.92	2180	1404.52	2232.67	2504.08	2600	2198.29	1876.59	2236.92	2177.97	2552.38	2405.96	1321.34	2048.29	2391.8	2993.37	1462.22	2171.93	1951.13
ACAP2	1958.3	1709.7	1216.93	1882.23	1278.36	1667.81	1761.29	1286.9	2281.75	2566.8	1955.47	2236.6	1827.62	2148.2	1327.69	550.939	1655.26	1269.96	1411.23	2248.29	1840.86	1720.84	2182.69	1339.23	2098.04	1658.48	1911.21	2147.71	1640.69		1983.16	1738.07	1615.85	2144.43	1854.62	1912.25
ACAT1	4032.87	4305.69	4585.02	3213.3	4834.47	3358.79	4018.86	4151.65	3744.34	3078.08	4517.11	3392.13	3605.44	3590.83	3253.99	3054.9	3615.18	3040.67	4371.35	3928.32	4874.1	3940.64	4211.61	5286.17	4062.86	3981.81	3454.54	4352	3785.15	4207.81	3512.67	4283.41	4954.29	4239.99	3485.18	3763.67
ACAT2	2938.72	2896.59	3065.44	2948.8	5251.82	2404.31	3320.45	2156.86	2574.33	2050.32	1839.09	3753.77	2611.87	2483.27	1785.76	4325.04	2161.47	2795.04	3340.51	3293.09	4962.81	6157.1	4274.88	6325.66	2229.28	3417.15	2320.77	3567.21	2876.83	4300.95	2629.83	2653.98	4652.83	2215.98	2081.79	3486.18
ACBD3	1856.31	1964.96	1532.86	2293.64	1416.21	1490.07	1273.17	1762.14	1801.9	1948.69	2517.64	1289.61	1437.05	1833.97	1848.05	1214.87	1873.25	1202.58	1760.8	1895.57	1653.97	1826.81	1828.17	2129.96	2389.91	1338.07	1883.11	1624.55	2024.32	1608.4	1086.9	1965.28	1553.7	1870.94	2073.6	1698.34
ACLY	47558.9	42987	38002.4	40710.5	37313.1	37566.8	45265.6	40912.6	41860.5	35927.6	45062.8	38313.9	43275.9	42559.4	45099.5	37817.4	40951.7	41522	44421.8	38883.4	46046.4	46032.2	50778.3	43532	44673.7	45101	43236.7	43541.6	47649.6	40073.8	41674	38329.7	40453.6	42059.8	37896.3	44282.8
ACO1	1648.51	1719.92	1569.62			1430.6	909.221	1326.16	1114.28	1540.36			911.868	1278.38	1088.41	1023.42	1084.69	1064.36	1384.75		1118.87	1580.23	2185.32	1017.97		1711.99	1068.27	1516.54	1275.03		1069.15	1354.64	1250.62	849.627	1245.03	1280.2
ACO2	12859.3	11312.4	11497	12727.4	11510	12341.4	11788.8	12438.7	11460.2	11540.3	12844.3	11877.2	12204.3	12903.1	12832.3	13207.2	10927.1	12213.2	11791.5	13412.8	13120.1	12137.4	15120.4	14704.3	15026.2	12333.7	11604.1	10719.3	12359.3	11798.5	10806	11213.8	12497.3	13036.9	12299.9	11871
ACOT13					1564.51	3598.23			3116.55	4542.59		1766.64			3592.2	2607.02
ACOT7	6428.19	7695.26	4323.54	6870.37	5609.89	5998.79	6540.43	6100.07	6759.48	7464.55	7636.54	5639.87	6971.43	8035.64	6755.87	4825.47	7049.12	7038.44	7850.58	5583.08	7086.7	7410.45	7718.68	5763.77	6707.73	8094.98	6926.13	7667.15	6270.33	5504.93	5837.01	5822.36	6234.15	7098.96	6527.38	8119.73
ACOT8	313.454							211.885					321.383						241.447		328.302	502.463		374.615	280.352											215.67
ACOT9	2174.11	2283.63	1744.89	2480.72	1249.95	1831.66	1918.54	2278.91	1993.44	2168.59	2001.92	1773.07	2441.36	2279.68	1877.64	2941.9	2205.8	2475.59	1526.99	3304.72	1577.57	2436.38	2087.03	2192.64	2412.21	1558.26	2402.94	2067.79	1879.79		2052.79	1842.66	2315.08	1816.25	1831.72	2512.03
ACOX1	1142.73	1002.11	1164.85	1898.09	1493.1	1399.55	728.697	1019.13	1021.17		484.6	652.423	925.053	1106.14	880.03	839.272	776.18	1557.85	1108.67	1206.66	1072.88	1024.15	643.803	1143.97	882.937	1074.02	575.58	962.397	905.704		854.007	608.736	966.768	779.428	859.21	1161.62
ACOX3	1404.52	1357	3551.02	1152.27	2877.91	1399.64	1553.53	1435.54	1719.09	1959.9	1371.57	2899.22	1138.93	1302.33	1069.63	1634.21	1331.53	1838.52	1831.16	1454.18	1455.16	1237.89	1557.09	976.868	1221.97	2015.39	1456.7	1480.42	1360.87		1988.91	1453.13	1852.47	1777.43	1545.71	1558.73
ACP2	1468.84	1337.41	380.656	610.928	355.479	200.562	704.769	1195.48	793.462	667.107	811.909		1328.41	1427.04	186.489		1664.38	1051.3	1027.01	542.26	1407.79	1336.62	1110.03	887.919	163.133	1115.09	1422.36	1525.14	974.719		1082.5	626.402	1468.49	795.682		1410.66
ACSF2	1992.78	1916.48	2174.73		1956.87	2682.6	2241.87	1443.65	1935.79		2100.43	2695.18	2422.11	1190.58	2263.09	1837.4	1582.1	2424.81	1816.75	2392.79	2146.11	1536.16	1568.36	1717.27	1731.27	2780.39	2463.85	1684.12	1845.93	2509.18	1782.97	1906.28	3019.47	1873.44		1895.83
ACSF3	1279.22	1007.95	1449.31	1213.16	1440.6	1314.67	1572.3	1022.01	1034.53	1561.06	982.416	1019.69	1356.39	1388.89	943.067	2001.64	1102.2	1039.09	1340.79		1366.81	1211.55	1548.17	1558.74	1162.37	1418.12	1366.71	1019.27	1929.65	1419.25	1070.37	890.456	1511.37	1148.91	1209.08	1205.32
ACSL3	5025.87	4937.41	5348.79	5226.08	2989.27	5302.54	4869.56	4328.53	4741.31	5172.25	5376.71	4494.68	5360.67	5783.62	4570.87	4123.4	3852.37	4129.75	4890.85	3463.22	4915.33	5484.3	5330.79	4604.91	5185.29	5609.65	5216.44	5590.98	4874.08	3957.36	4611.95	4378.35	4934.17	5072.64	4437.82	5157.04
ACSL4	1439.65	815.673		948.232	1517.45	1365.54	1484.72		1227.56	1199.57			1361.57	751.061	1699.44	1729.29		702.131	528.045		1218.42	1062.19	1344.72	768.997		1196.42	1534.35		1594.02	1449.6		1351.49		1490.81	1672.88
ACSS1	1100.83	1319.22		1536.14	867.751	1148.04	880.685	1736.39	493.912		1115.23	893.523	958.485	1185.21	723.327		1367.9	1150.16	1013.72	1278.79	1006.53	1244.7	640.975	1162	1023.06	1244.62	1118.16	747.716	596.876		1162.11	1547.19	1282.92	1299.94	1478.56	1149.09
ACSS3	2864	1852.47	2608.95	1885.49	2754.92	2276.77	2532.4	2566.73	3090.74	2559.01	2617.58	3489.99	2765.15	2374.33	2736.74	2265.09	2013.21	1949.89	1682.07	2223.26	2364.66	2025.78	2270	2211.36	2549.63	2420.04	2010.24	2399.69	3035.8	3516.5	2423.77	2004.72	2546.11	2464.7	2296.34	2035.76
ACTBL2		2736.73					5020.91	2402.5	4711.5		5722.47		3759.66		3869.08	5013.42	2922.49	3208.87		4204.53	3634.13					4099.25	3355.31				5561.83	4729.25	8798.51		2792.19	9624.79
ACTL6A	7216.18	7760.26	6843.26	7197.54	5196.02	7119.17	6784.48	6676.84	5791.41	7698.39	6316.22	5048.69	6085.92	6185.95	5600.48	3483.48	5435.74	5317.19	6280.2	6535.81	6177.64	6535.1	5941.87	6979.26	5652.28	6839.67	4956.51	8939.26	6838.62	5230.66	6002.39	6253.68	6510.41	6945.55	8168.76	6055.77
ACTN1	4092.9	1308.41	2585.22	1845.86	3617.28	1260.02	4135.08	2753.03	2432.07	469.587	4074.46	3035.79	4536.92	3174.64	3914.4	2473.28	3551.3	3116.3	3262.98	3174.37	4049.22	1463.93	3510.86	2042.45	3256.58	2229.7	2893.75	1665.13	3599.02		3618.87	3476.83	2201.22	2848.88	1362.7	2841.35
ACTN4	9638.33	3006.8	6795.95	2210.97	8174.05	2649.09	9923.69	4612.37	5879.81	2854.83	10077	6165.59	9766.64	7408.91	8732.4	5901.95	10643.4	7933.23	7373.92	5240.17	9274.87	3032.71	7751.1	3014.62	8039.2	4643.37	6681.82	1951.58	5851.37	1742.48	10042	9123.67	6626.25	9107.01	2805.8	10304.3
ACTR1A	1050.98	1343.62	1878.57	1466.57	2098.14	261.27	528.62	1001.55	985.033	857.609	922.334	2121.67	954.908		403.849		312.423	544.3		510.486			641.474		447.549		486.036		747.046		956.997	501.344	1765.61	634.697
ACTR1B	748.111	165.039	1582.9	876.425	1510.32		894.289				773.348	1099.4							831.658		715.449	794.69	904.92	1133.64	380.552	1130.62	359.383	654.954		1508.72			1106.12	647.061		1058.88
ACTR2	25247.8	20809.9	22292.5	19989.2	26056.7	19996.1	25627.3	21081.9	24634.5	26599.3	21291.8	17546.9	21112.6	18955.6	20328.5	17897.2	22019.3	18974.6	22573.9	14946.8	23527.7	22248	26715.7	24910.3	18824.7	25664.4	19868.6	26514.9	23279	23572.9	19352.2	20294.5	23559.5	20322.3	19436.7	20806.5
ACTR3	12282.5	12760.1	11284.3	11906.1	11555.3	11341	12048.3	12667.9	12615.8	11938.7	10246.2	10573.4	9775.61	11360.5	10585.9	9455.75	11749.9	10766.9	12424.9	9596.95	12250.5	11167.9	11495.2	11993.9	12780.9	11336.8	9363.85	12133.2	11013.1	9937.16	11471.5	12712.5	12185.5	10752.6	11986.9	9707.24
ACY1	1520.95	731.427	1967.4	1767.45	2287.49	1397.07	1426.27	1654.97	1671.89	2166.24	1672.14	1810.68	1370.45	1803.77	1895.85		1115.33	1262.56	1600.05	1523.33	1029.84	1675.96	1752.17	1638.78	1941.05	1699.88	1364.95	1587.03	1820.92	1854.72	1241.83	1013.9	1523.85	1875.04	1313.47	1493.37
ADA	803.994						754.09		567.558		791.326	1084.35	878.087	1232.69	640.442		738.247	636.761			808.919	813.622	582.061		528.806	705.969	640.283	1425.67			659.103	745.645		862.262	849.772	727.778
ADAM10	2957.73	2709.12	2230.6	699.57	2754.68	2297.55	2345.34	1857.06	2721.45	1677.68	2351.96	1683.64	3335.71	2492.86	2656.93	1591.16	1624.49	1679.73	2279.85	2062.86	2382.56	3014.58	2495.66	1997.48	2644.54	2816.21	2622.68	2250.16	2644.94	2837.03	2243.42	1750.59	2702.08	2996.55	1188.32	1837.53
ADAM15		296.945	459.64		644.422		500.117	657.911	668.133	298.211		953.525				792.862			277.031		666.877	623.695		416.835						345.385		565.732				167.332
ADAM17	1115.28		554.271	1084.81		733.506	1045.67	1235.81	1125.47		1253.09		931.035	597.567	530.517		799.57	779.175	807.328		1058.97	767.46	721.743	672.573	665.513	788.786	792.947	1288.32	888.384		1314.29	1326.46	1265.92	936.327	475.372	1108.66
ADAR	2655.57	3017.74	2573.95	2641.72	2127.95	2419.26	2484.2	2958.16	2860.28	2153.84	2393.76	2763.2	3055.15	2904.63	2688.02	3003.45	2908.34	3098.33	3083.48	2854.85	3089.4	2805.14	3071.69	2840.65	3230.92	3376.66	3272.87	2529.53	2757.42	3084.47	2708.15	2760.37	2714.68	2741	3157.53	2559.37
ADCY9	2220.98	1342.32	2829.54		1553.07		877.015	824.428	1017.25		1163.27		1604.37	2625.88				1746.24	504.168		1106.49	919.726	3069.38		1121.49	2204.98	916.053	3364.24	2425.53		1991.99	413.706	2277.39	1249.88	784.311	2208.14
ADD1	1293.88	1798.26	2138.85	1783.97	2013.62	1826.02	1332.47	929.803	1562.46		1682.28	1311.65	1684.03	1469	1471.38	1095.18	1698.02	1062.06	1351.2	2923.2	1581.08	1366.79	2049.98	1838.74	2123.81	1958.07	1142.71	1705.03	1296.65	2822.28	1707.01	1342.11	1427.59	1489.88	1566.41	1267.96
ADD3	838.055	1081.79	1053.86	1177.99	1033.44	1079.71	855.06	818.809	1303.45	2058.55	1220.69	821.716	1568.37	1220.07	932.505	1399.02	1002.89	957.155	1028.85	1773.36	1129.22	1105.48	1021.51		1455.95	1093.28	1231.19	1101.12	1186.37		701.513	945.677	1353.13	1227.28	1014.53	1401.42
ADH5	15339.9	15144.7	9481.58	12269.5	7962.3	15879.9	17051	16637	18355	13416.6	12221.8	8225.1	12982.3	11918.5	13184	6827.78	14139.2	12882.9	14883.5	8530.29	14132.1	15765.4	10864.3	7604.12	8825.71	16756.2	14216.6	16811.5	12892.4	10617.4	20693.4	17810.4	18237.7	18169.2	14794.8	16935.8
ADI1	2241.5	2976.9	8117.76	2038.01	3683.26	2891.72	2353.42	2691.89	1977.55	1714.39	1966.24	3666.37	2741.17	1857.85	2619.06	1547.82	2195.37	2436.14	3595.95	1665.59	3445.58	3186.99	4260.65	5262.27	1939.75	1848.64	1778.75	910.657	1591.93	2381.33	2383.99	3009.2	2542.9	2729.13	1574.53	2728.75
ADK	2797.07	3782.63	2728.85	2902.89	1875.96	3192.26	3054.72	2928.11	2946.11	3193.52	1913.26	1399.4	3080.2	2942.81	2301.64	1399.22	3123.28	2994.63	2854.51	2320.69	3299.14	3389.62	3508.36	3158.76	2730.49	3308.71	2875.53	3454.82	2446.24	2038.59	3074.73	3490.59	4162.33	3060.36	3551.02	3490.73
ADPGK	3664.54	4096.41	6708.19	3947.35	6161.03	4830.78	3818.92	3555.75	3113.81	3020.91	4042.86	4405.17	3759.03	3994.31	2998.21	2450.79	4089.77	3081.5	4348.77	2487.08	4191.04	4474.37	4822.33	4765.87	3501.22	4399.19	3468.4	5025.27	3320.14	3612.79	4708.94	3460.27	3901.58	3541.7	2607.77	5422.99
ADRM1	2862.64	2820.88	1997.15	3164.43	1906.32	2628.31	3297.47	2017.19	2032.21	1564.3	2186.77	2764.88	3888.78	3743.26	1887.86	3167.73	4643.38	4274	4396.84	3055.69	2972.78	2764.68	3814.08	2060.37	3939.04	2503.53	3847.19	1769.71	2019.09	4642.71	3418.85	4068.2	3596.52	3066.03	3923.4	3686.91
ADSL	3706.13	4071.45	4389.6	4421.09	2568.6	3246.68	3656.96	3562.76	4712.4	3014.66	3197.86	2750.79	3356.35	3676.1	3561.89	2524.76	3756.18	3926.65	4260.57	1979.5	4118.79	4156.14	4095.41	3234.19	3389.8	3691.6	2904.87	3316.57	4620.24	4430.23	4694.33	3641.64	3598.59	3698.52	3614.39	3495.24
ADSS2	6392.29	7635.74	6502.45	8243.2	7447.65	7385.31	7785.47	8935.08	8741.16	7291.68	8977.01	7409	7298.56	6872.95	8583.98	5679.16	6764.59	6011.97	7378.49	5564.32	6294.05	8153.1	8156.55	6410.77	7130.73	7844.76	6007.95	8908.99	8000.99	5924.42	6768.49	6974.53	6254.89	7694.64	6936.26	7438.14
AFDN	1143.58	1064.99	1061.53	1447.4	1497.23	1016.86	748.906	1096.67	1984.84		1017.75	1016.22		995.543	914.081	1490.71	1134.95	1030.37	801.974	1099.55	710.394		1403.77	1413.28	1680.91	1604.66			1398.54	849.498	536.746	1261.19	701.119	930.551	743.351	1018.27
AFG3L2	3295.01	3287.44	4786.77	3728.5	4267.93	3664.19	3318.67	3581.13	3532.23	3192.7	3277.48	3292.33	3883.48	3777.08	3947.3	3923.25	3431.77	3139.55	4325.73	3763.37	3838.93	3743.29	4206.74	3691.8	3736.11	3266.88	2644.86	3010.28	3336.84	5603.8	2882.47	3143.49	3486.46	3081.03	3081.99	3345.13
AGAP3	1350.6	1210.24	1806.19	1583.05	1021.22	1298.74	984.884	1316.61	1501.88		1152.6	1519.9	1366.45	2251.04	1314.1	2108.55	1899.65	1107.25	1331.49	2076.18	1971.22	1501.25	1933.43	1273.03	2051.96	917.446	2177.51	1390.14	1930.29	234.947	2124.11	1374.37	1611.55	1185.62	1713.13	1515.01
AGK	2195.76	1779.15	3123.22		1294.8	1530.02	2288.39	1613.56	1663.73	1477.33	2460.59	1683.4	1368.69	1352.76	2200.36	1252	1087.93	1466.69	1728.47	2188.37	1868.47	2429.34	2177.4	1540.86	2013.82	1865.46	2743.05	2204.6	2195.37	1745.15	1529.31	1948.55	1116.04	2295.08	2510.04	1710.78
AGL	1834.75	1550.54	1518.93	1922.78	1682.5	2289.72	1645.11	1996.83	1941.21	2111.16	1720.46	1536.7	2052.51	1840.66	1782.91	1906.59	1898.67	1885.83	1806.84	1968.72	1874.6	1911.32	2001.59	1678.87	2030.21	1764.6	1861.47	1870.25	2315.36	2074.23	1907.83	2209.97	1683.24	2018.74	1936.69	1924.79
AGO2	2456.84	2690.98	4542.96	3491.12	2856.82	3081.34	3072.45	3257.03	3136.29	3083.27	3420.09	3483.02	3331.32	2503.36	3724.88	2951.98	3260.17	3141.81	3179.99	2916.64	3234.05	2782.6	3054.98	3587.9	2751	3603.68	2775.04	3251.72	2883.3	4066.54	2699.94	3030.06	2955.88	2932.04	3112.45	3097.03
AGPAT5	1225.8	1498.23	1310.36	1750.54	1567.33	1765.05	1039.03	2251.47	1629.8	2681.35	2042.52	1187.13	1302.57	1460.36	1235.5	1173.2	1930.83	1087.92	1368.84		1168.26	1039.54	1073.93	2215.71	1937.44	1396.88		1220.35	1431.86		1845.18	1263.58	1704.26	1326.51	1872.43
AGRN	1555.49	2036.19	5342.53	3639.35	2631.29	1810.46	1909.95	2324.03	2021.24	2534.55	2252.85	2953.31	2502.61	1910.62	1357.2	1995.06	1340.75	1631.53	2448.15		1914.07	2169.05	2839.25	2397.27	1482	2365.04	3566.06	3717.43	2660.41	5316.7	1804.11	1438.41	2054.75	1901.93	2606.02	2051.69
AHCY	48277.3	53318.8	38443.2	54529.8	35341	48318.5	48077.4	52385	47763.6	42577.1	51731.2	36396.8	56876.9	57062.1	48881.9	36387.5	52649.8	56313.1	56515	48656.4	54326.6	56289.9	55385.9	52407.4	51541	54179.4	59029.7	58843	49001	31574.1	49209.3	51312.1	53751	50363.7	55881.4	59794
AHCYL1	1500.11	816.92		630.451	7581.25	1021.73	1143.95	857.11	1063.79		1017.63	601.889	1368.7	1524.88	1185.94		1171.05	1205.4		966.551	1150.36	1573.63	1094.64			1419.15	868.035	1330.91	1005.94		856.46	984.311	1023.26	1123.9	1155.64	2012.47
AHNAK	5512.36	4166.09	7750.7	4595.6	7570.14	3822.5	5540.71	5039.16	5962.97	4160.96	5705.91	5904.95	4652.64	5020.07	5864.62	6130.81	4267.33	3968.19	4547.12	6018.21	5620.38	4604.17	5329.6	5600.09	5063.14	4830.11	4741.36	2967.69	6936.38	5537.42	5387.28	4804.66	4648.69	6019.18	4407.13	5645.57
AHSA1	23795.8	24000.3	16814.9	20425.9	15534.7	24237	27776.5	27003.5	26458.9	24555.1	22899.8	17229	23119.1	24464.6	23490.1	15204.9	21804.9	22329	22939.8	17913.5	23446.9	27578.4	21043.7	18986.7	18057	24809.7	21730.9	21811.9	25705.9	7996.05	25839.3	23097.1	26793.9	26757.2	24798.7	27087.9
AHSG	1649.28	1554.35	744.865	1088.09	2965.63	1705.54	1876.42	1627.5	840.878	887.22	1416.8	1693.42	1301.77	880.369	1676.58	2784.51	1401.03	1493.78	1617.96	1598.47	1784.49	1052.27	1474.61	1707.32	1565.3	2124.54	1296		1205.55	1072.9	1483.3	2066.33	1421.11	1554.79	743.398	1751.52
AIFM1	14756.9	15306.5	12822.2	15545.4	15441.4	13047.1	15353.6	13003.9	16697.2	14137.5	15515.2	16132.8	16162.3	15425.8	15588.2	13943.5	12211.8	16275	14028.2	13241.2	15034.5	12473.1	16541.2	14985.3	15975.3	14496.4	15807.7	14140.7	16624.2	12732.3	13159.2	13043.3	13235.1	14813.7	13114.8	15862.5
AIFM2	4633.51	4631.81	1508.1	3948.76	1880.04	3765.4	4738.88	5106.45	4951.51	6509.73	5102.81	1271.61	3987.49	4533.92	3761.79	1655.88	4489.04	4581.7	2787.83		3739.47	5295.97	3175.64	2016.26	3823.8	5408.71	3315.33	4394.65	3838.11		2923.21	3598.61	2879.28	5469.38	4063.5	4553.87
AIMP1	2233.37	3481.43	2991.89	3533.13	2116.52	2582.79	3232.53	3295.26	2261.58	2175.53	2251.83	2679	2798.61	2916.61	3143.14	2283.42	2985.49	2830.84	3538.65	2625.21	3860.25	2989.33	3514.13	3904.43	2809.86	3160.98	3187.26	3428.97	2591.82	3044.78	3032.37	2454.74	3443.95	2455.05	2768.74	3072.76
AIMP2	28080.1	27717.7	17391.9	21217.8	16507.9	23643.7	24493.3	23555.4	25106.3	15794	20407.3	25772.5	24063.1	26531.2	22403.5	22972.3	19842.9	22235.6	20536.9	13706.2	26309.7	27225.1	21676.4	22920.4	15819	24829.6	20000.6	28581.1	24333.5	44193.9	23799.5	27177.9	23056.3	23816	19154.7	21933.3
AIP	3634.74	1720.2	5427.7	1853.5	5327.51	1993.06	4146.6	3295.51	4279.81	1572.13	4634.55	4062.1	4198.82	3050.32	3424.48	3626.96	3614.99	3181.17	3936.34	3964.44	3587.86	2211.97	4218.02	3957.44	3373.67	3290.21	2584.81	2174.3	4804.69	1887.19	3793.79	3895.9	3045.69	3531.03	1741.27	3821.34
AK1	4635.09	3520.27	6548.92	5310.56	6971.97	3752.82	4686.72	6208.38	4360.27	2145.41	4302.68	6025.31	5131.93	3537.88	4706.95	3339.31	5460.61	4625.9	5842.05	5325.23	4053.36	2874.26	5099.56	5083.17	5206.06	5525.35	3756.69	2058.72	5104.07	3908.8	5015.45	4836.27	5225.96	3345.85	4711.46	3800.65
AK2	2150.34	2577.58	1819.16	3055.56	2644.51	2586.79	1804.21	2214.86	2099.02	2957.21	1925.74	1505.66	2781.47	2503.82	2415.65	2049.47	2583.17	2460.59	2061.15	2821.75	1968.43	2465.48	2336.15	2461.45	2509.98	2210.19	2380.16	1478.62	2052.82	1913.57	2208.42	2859.4	2074.31	1884.24	2543.25	2591.21
AK3	6513.49	7486.65	8402.56	6795.15	7663.28	8509.71	6187.55	7231.87	7307.86	6015.23	6800.3	6692.7	6401.57	6720.92	7117.98	6776.89	6873.61	6731.86	5850.05	6895.71	6047.12	6767.2	6709.97	7748.58	7304.51	6861.06	6451.08	7535.98	8090.56	6680.34	6382.71	6236.5	5689.32	6503.62	6991.59	5928.64
AK6	1244.18	140.871	3609.29	422.533	2993.02		1595.11	332.896	1119.79		310.047	1156.8	358.233			778.678		390.608	1166.91		1045.98	984.065	1727.73	1474.7	588.733	1422.7		1303.26	662.748		1410.58		478.579	409.004		514.388
AKAP8L	2369.57	2188.04	1835.66	2195.3	2259.7	2986.37	2295.89	3221.87	2620.14	2590.52	2435.51		2152.82	1755.59	3473.67	2211.86	1721.6	2064.31	2909.85	3210.86	1674.37	1568.35	1970.91		1338.1	1758.26	1389.42	1973.96	2184.44	3353.34	1860.8	1857.77	2521.1	1777	1443.35	1395.81
AKR1A1	875.424	942.841	1316.76	1115.5	1801.85		1025.54	1142.84	1505.26	761.66	1488.32	1698.08	1167.2	1655.5	1139.57	1080.22	1212.04	1307.45	1122.72	2172.61	1267.44	1604.71	1579.44	1411.76	1344.3	1363.64	1155.74	1477.9	1617.72	1109.08	1637.66	1034.09	1227.93	937.303	1232.91	1209.17
AKR1C2	2786.38	3405.11	5326.87	3748.33	3789.53	3338.01	2637.29	1695.81	1630.31	2413.07	1707.96	1385.56	2557.64	2974.59	1353.23	2205.66	2092.53	1561	4376.06	3279.26	4427.85	5195.26	4427.03	5497.1	2482.71	2402.57	3295.53	5850.47	2269.73	2908.39	2663.81	2119.78	2941.36	1729.01	2052.3	2599.29
AKR7A2	2428.21	3020.24	3111.98	3290.67	3795.2	2596.18	2560.85	2656.58	2518.61		2489.71	2928.03	3349.44	2749.38	3124.35	3570.29	4012.4	3230.89	2816.01	3593.44	2585.61	2824.73	3815.03	3238.01	3490.78	3121.93	3584.91	2917.47	2740.75	8173.9	2693.32	3726.02	3993.07	2670.93	3547.78	2387.72
AKT1	1524.61	1596.23		1307.66	543.996	1514.67	1596.43	1986.25	1625.63	1590.27	1854.11	1501.49	1696.98	2301.17	1195.75	1521.15	1448.62	1544.87	1509.63	808.838	1445.77	1341.61	1622.28	1000.71	1626.53	1264.77	1425.52	994.184	1246.04		1328.53	1290.94	1181.4	1249.14	2255.13	1428.97
AKT2				1058.96		744.198	1278.58	398.729	723.02	1018.53	611.057						411.631								714.918	890.022						191.499		1375.64	1205.06
ALAD	812.884	1591.35	1419.88	1004.16	738.91	1201.75	1113.48	927	901.202		888.523		893.405	999.542		1460.53	1122.16	1128.37	1321.2	1312.47	760.056	1150.36	1045.1	748.086	938.224	624.864		1539.45	1017.92		865.635	891.33	889.52	635.375	1433.44	1033.6
ALB	2328.92	2093.82		2694.87	3367.52	1624.62	1494.69	1425.74	1874.09	4370.71	2711.78	2630.46	1844.58	1974.1	1796.37	1518.76	1797.43	4125.51	523.281	2763.85	1700.86	1957.25	1859.6	2281.15	2360.66	1988.92	1857.43	3271.16	3064.24	2207.37	1592.96	2286.13	2426.85	1326.96	2448.39	2820.19
ALDH16A1	1790.36	1688.05	2030.89	1780.41	2676.23	2073.22	2079.73	2209.77	2202.23	2140.75	1695.6	2831.64	1958.33	1974.56	1802.33	2642.73	1638.17	1456.85	1600.76	1916.61	2235.19	2146.72	2202.85	2431.28	2052.25	1732.56	1553.92	1899.44	1501.36	2028.27	1686.49	1992.45	1697.29	1938.78	1731.78	1472.7
ALDH18A1	21601.3	21544.5	15820	21172.8	16341.7	16807.4	20848.6	18821.7	18215.5	18287.1	20414.6	17870.8	21847.7	22177.2	18794.9	14789.2	19603.4	19302.5	19695.1	18553.3	21207	19756.4	22462.6	17815.2	20368.1	19105.5	20652.5	18005.4	18078.9	15668.6	19213.5	19121.2	19005.1	20691.1	19579.1	20343
ALDH1B1	5166.1	5206.37	4899.08	6426.69	5254.18	5534.99	5231.66	4677.46	4927.49	4049.27	4300.06	4452.62	5945.06	5778.21	5237.18	5236.71	5978.28	5846.12	5845.79	5252.42	4599.47	4706.06	5266.11	5621.05	5273.94	5345.34	4459.49	4629.73	5663.16	2921.19	5553.3	5776.17	6107.92	5197.17	4474.56	3764.61
ALDH3A2	558.383	602.226	657.223		1205.03	687.213	454.684	1030.89	835.219		670.426	1060.25	1010.42		695.223		491.03	503.715	525.768	937.077	509.495	714.505	621.978	750.773	383.545	697.325	565.95	877.98	780.879		546.359	452.615		890.693	840.556	719.985
ALDH4A1	3413.72	3092.85	4866.24	3095.23	3846.7	2920.42	3459.5	3400.72	3388	3458.59	3463.8	3435.76	2543.8	3429.96	2962.33	3172.55	2771.61	2273.53	3525.49	2835.55	4324.66	3459.28	4025.08	3952.82	3653.55	3054.28	3211	3131.84	3502.43	2707.16	3104.15	3549.92	3186.31	2626.11	2815.27	3178.69
ALDH5A1	3206.33	4074.47	3938.73	4140.06	3951.53	2795.66	3434.93	3435.63	3172.57	3410.94	3574.52	3576.2	3834.01	3259.15	3366.89	3674.39	3510.88	3455.73	4035.13	4663.81	3575.55	3041.05	3359.65	2846.12	3628.77	3571.01	3810.92	2812.51	3770.83	3199.72	2425.75	3627.51	4009.25	2530.87	3480.34	2977.1
ALDH6A1	6304.56	6838.97	3544.85	6739.68	4935.01	5927.34	7053.9	6584.48	5853.71	7938.89	5063.28	4995.47	5269.06	5721.93	3763.46	4534.06	5466.29	4979.45	5441.06	4218.85	7800.12	6596.61	5731.46	5963.09	5483.24	5863.41	5131.17	8113.29	4939.23	25851.6	5313.5	5240.88	6069.52	6490.36	6649.02	5596.72
ALDH7A1	14396.6	15837.6	13384.5	16237.9	14919.3	14444.8	16141.4	15772.5	16995.7	14669.2	14883.2	12375.3	15694.7	13469.3	14571.2	10362.8	15271	14464.9	17454.7	12166.5	14107.1	15001	17579.9	18090.4	14023.4	15678.4	13007.5	18850.2	14328.7	14810.4	12158	14190.3	14132.8	13585.3	12652.9	12844.4
ALDH9A1	4861.11	4835.02	3959.82	4505.37	4865.55	4798.71	5464.58	6058.04	7664.99	4542.99	5964.67	4303.37	5418.49	5458.06	5362.18	5115.74	4607.09	4967.37	4763.81	4509.24	4959.82	4642.73	4616.03	4892.15	5014.5	4922.5	5419.97	4997.82	4857.35	4038.83	5163.7	4932.33	4252.27	5356.9	4972.15	6096.05
ALDOA	81123	76772.1	92442.1	81640.4	91260.1	75892.7	84447.8	74105.2	71991.2	60505.1	74438.2	83035.5	75119.4	78873.4	80295.1	85457.5	77520.3	70840.2	79669.8	81908.1	83851.9	76609.8	92310	91897.4	81606.2	82628.7	71940.2	75185.5	74256.9	72431.7	69466	67817.9	68687.6	67880.8	69672.2	79551.7
ALDOC	6416.24	7050.46	7140.1	7515.98	8139.9	6424.63	6244.44	6476.54	6906.57	6376.1	7396.11	6661.08	7033.46	6691.05	6468.73	8038.37	6357.21	6798.48	6476.47	7941.65	7157.39	6714.94	7113.12	7488.66	6764.87	6723.49	7335.31	6741.58	7056.71	6692.83	6658.09	6816.98	6648.44	6452.11	5919.47	7016.76
ALG1	920.437	733.716	701.343	1328.1	1047.66	1161.04	1241.59	1214.22	801.91	698.402		814.257	1006.78	1265.2	503.455	989.766	1096.13	936.386	943.644	864.262	884.18	852.35	404.317	606.826	728.322	661.391	898.833	700.386	722.59		708.38	669.077	344.172	952.436	1227.94	863.637
ALG5	3892.56	3151.27	3944.02	3639.21	3847.13	3885.57	3757.1	3648.78	3952.43	3521.36	4239.21	4466.4	3839.95	3718.59	4184.53	3778.09	3675.7	3161.12	4008.9	4903.53	3254.47	2771.59	3440.62	2682.2	4689.91	4327.86	4199.99	1793.23	4034.21	3791.16	3461.58	3324.81	3238.73	3959.12	3623.44	3429.04
ALKBH1		260.823			348.953	436.72	242.551	143.129	251.103		478.675	425.477		431.982	128.857		384.616				510.64	266.288		330.41	346.998	177.77		358.734			227.979	176.865	388.466	381.871	829.251	571.026
ALKBH4	1802.23	2098.23	2616.8	1712.97	1264.5	1865.82	2044.01	1989.55	2055.71	1510.24	1990.54	1076.18	1960.66	1680.39	1801.2		1343.67	1889.96	2203.33	1519.28	1885.43	2143.03	2291.32	5273.48	1979.11	1865.79	2276.33	1502.93	1419.27		1741.42	1953.64	1723.2	2070.72	1464.99	1684.88
ALKBH5	888.384	1103.73	1574.72	935.392	1084.86	1577.52	1011.72	1186.66	1127.69	828.216	1570.79	1005.26	1196.49	1502.07	1784.11		1367.93	1244.36	1246.79	1823.28	1083.24	1164.64	560.884	742.857	851.853	874.046	1009.5	880.106	1011.51		1217.54	1474.64	457.188	1136.85	1003.1	1660.27
ALOX15B				185.15			549.2							518.769		352.435					472.495	487.171					509.272								671.242
AMDHD2	1469.39	973.227	1829.57		1576.81		1118.98	1443.86	1187.19		970.755		1241.05	1481.89	2029.2	992.665	1452.71	1653.76	1161.83	1723.94		1636.12	1682.17	1480.81	1886.84	1101.01			1937.19	2057.07	666.94	896.75		1374.66	1911.55	1979.73
AMMECR1L	307.89	346.208	676.813	952.17	613.789			525.387				379.758	920.155			360.695	424.14		1252.49			599.22	593.148	711.569			714.539		859.45	1037.06	325.574		254.499
AMPD2	3008.25	2865.42	2936.29	1743.32	1877.16	2113.75	2352.29	2059.28	2293.72	3997.8	2321.41	1214.89	2742.88	2088.01	2033.71	1241.65	2652.32	2259.37	2302.14	2220.51	2106.9	2196.15	1829.64	2039.3	2017.93	2066.79	2287.65	2082.99	2815.78	2662.68	2758.63	2349.69	2379.85	3011.75	2307.51	2198.3
ANAPC1	1385.91	1200.45	1630.3	1168.73	813.505	1458.17	1095.39	1346.43	1409.53	2153.12	1137.67	1299.86	1490.08	1153.29	1328.91		946.828	1130.62	1552.29	1803.58	1030.56	969.307	1487.34	1292	1267.38	1482.87	1345.14	977.03	1299.74		1523.31	1354.1	1035.09	2021.22	1620.06	1069.54
ANAPC4	1768.49	1569.36	1965.92	1099.78	1103.93	1186.52	1780.29	1265.2	1158.67	2052.53	1771.55	1986.59	1626.12	1872.39	1320.08	1140.87	1632.89	1889.63	1354.61	1404.89	983.616	1757.33	1120.19	1417.78	1608.11	1646.55	1499.77	1508.34	1607.1	1073.85	1452.4	1528.99	1725.65	1621.31	1484.47	1417.17
ANAPC5			227.015				137.666				184.043								112.771							205.332
ANK3	1493.54	1816.53	3119.77	2450.56	1998.5	747.462	1226.81		906.557	1598.02	1366.2	2035.41	1676.74	2126.64	1582.49	2919.52	887.376	1472.66	1223.04	1447.7	1138.52		1688.88	1497.59	1407.98	1151.6	1528.33	1267.13	1243.57	3060.23	1503.61	1009.9		1643.51	1583.8	1214.9
ANKFY1	2651.09	2726.75	2222.95	2483.76	1854.46	2492.46	2549.45	2436.65	2119.92	1835.04	3079.12	1780.42	2308.2	3043.22	2187.78	2367.11	2906.19	2623.46	2639.17	2085.91	2814.86	2351.3	2153.46	1657.69	2686.98	2971.15	3011.3	1941.13	3112.91	3183.8	1783.89	2248.65	1927.63	2691.29	2172.7	2327.21
ANKRD27	768.877	774.266	952.536	523.411		1156.78	1077.18		1108.33	981.953	875.658		1287.06	456.326		733.604		718.902	384.509	738.755	689.814	611.539	712.35	437.367	452.587	1250.25	962.357	1243.18	852.013		1032.39	884.234		973.652	1136.59	913.531
ANKRD28	799.261	1555.33		1879.24	970.533		2047.33	1649.62	1025.98		1104.36		1477.16	1720.06			1050.26	2411.96	2422.66	1104.02	2020.52	1843.17	2433.64	2065.12	1941.31	1197.01	2563.58	1380.42			745.978	1222.14	1522.24	1106.43	840.433	961.664
ANKRD50	984.633	876.677	2087.68	1221.55	1216.77	1227.75	979.122	850.83	1116.96	1383.61	1064.18	1346.5	1224.6	1220.72	746.357	2026.78	999.333	1079.36	1220.48		719.879	1239.7	1057.51	1202.99	759.385	1150.95	1037.48	970.107	675.061		982.55	701.374	893.561	779.172	847.303	751.673
ANKRD52	1512.23	1733.51	2026.44	1169.49	1730.56	1182.33	1552.11	1634.29				1790.02		1770.72	1835.43	2310.44	1878.68	1749.91	1479.75	2042.13	1556.6	1280.76	1594.22		2336.98	2341.01	2250.57	1129.92	1866.69	1650.95	1580.21	1697.37	2493.02	1742.98	1825.72
ANKZF1	669.245	697.59	804.666	699.312	823.422	848.85	560.177	674.776	587.179		846.031	855.372	1098.63	1197.04	1054.39	1193.21	1312.63	790.188	1075.45	923.553	838.256	963.627	585.977	801.421	835.084	979.058	844.452	521.902			501.896	274.221	645.699	626.597	854.715
ANP32B	1726.91	1057.16	1977.95		1533.25		2321.99	803.824	2193.61		2309.28	1023.03		1394.28	2071.02			1599.84	1247.34		1351.48		1399.53				972.402				2226.87					1782.09
ANP32E		555.305					273.575	381.071							404.359		248.393				256.405				640.206	309.336		293.746	598.723			356.424		364.912	227.642
ANXA11	2325.36	2379.54	2938.11	2383.36	2823.77	2848.4	2370.84	2220.04	2622.45	1877.01	1890.34	2882.7	2922.9	1991.27	3407.75	2711.12	2193.23	2271.74	2294.16	2761.51	1965.13	2315.93	1923.57	2166.23	2335.8	2640.21	2308.02	1775.94	2349.87	2219.51	2604.76	2611.07	2046.96	2428.48	2340.39	1956.23
ANXA2	12729.1	9850.39	13039.7	12317.3	17242.4	8428.81	15249.6	12977.9	15194.6	5653.87	12330.6	15340.1	12874.4	9266.17	14288.2	13922.3	12141.8	11125	11026.9	8391.79	10404.1	10623.8	10386.2	10837.4	13755.9	13967.3	12087.7	2361.84	14234.8	6167.51	11429	12367.2	14396.2	13210.3	8871.29	9578.83
ANXA3	974.705	552.31		908.517		680.477	853.694	1045.83	1115.95	1711.74	726.329			526.3	1134.33		747.737	969.766	500.184		400.84		439.86	753.403	521.412	437.832	821.854		1160.64		963.241	1068.31	891.839	876.969
ANXA4	6563.68	5706.32	5758.15	5168.83	5486.68	5541	7171.84	6717.48	6718.33	2577.47	5414.01	5640.99	5996.84	5502.04	6120.04	6033.31	6330.37	5589.79	5338.94	5012.25	6250.06	5504.11	5593.06	4892.04	6236.3	5946.4	5407.63	2795.6	5801.58	5354.91	6802.5	6873.11	5926.07	5323.73	5489.94	5550.39
ANXA5	9327.95	7981.45	10312.9	7489.43	10969.2	8433.67	9572.31	9673.93	9782.03	3527.86	9264.72	9899.74	10309.1	8567.82	11873.7	7906.7	11441.8	8358.85	9219.62	8163.59	8870.34	7735.94	7728.61	6984.23	8983.25	9787.03	7755.45	3395.32	8395.55	4565.62	10327.9	9581.79	7838.2	8333.94	7934.42	8189.73
ANXA6	6054.24	8257.35	4904.22	5883.9	4776.52	6501.76	7112.75	7113.49	5839.37	4470.3	6274.78	5666.11	8001.55	5611.81	7876.12	4503.14	9198.3	6573.85	8311.3	5677.43	7378.08	8244.67	6935.22	7386.86	6261.9	6626.15	6402.15	6761.59	5978.21	5766.31	7664.39	9124.3	6585.58	5574.96	6595.12	6934.54
ANXA7	5180.22	4770.8	3138.63	3715.56	3175.47	5634.54	5273.62	5075.67	4789.6	4214.4	5126.65	2562.34	4086.04	4094.96	4492.27	2635.56	5137.23	4875.52	5052.57	3188.81	4841.7	4176.53	4313.99	4044.72	3634.98	5286.53	4345.38	3703.17	4564.29	3074.33	4774.45	4502.11	4876.78	4611.92	3877.48	5145.41
AP1B1	9565.22	9816.64	5804.49	7794.73	6515.28	10365.1	9571.6	9118.71	10455.7	10891.5	8273.67	5155.94	8840.29	7847.66	7998.21	5256.25	8630.68	8523.08	8305.39	4436.35	7841.73	7795.33	7793.94	7597.44	8206.3	10031.7	9023.89	8816.45	8199.93	5083.77	10343	10539.1	9739.62	9542.37	9082.84	8774.63
AP1G1	8354.51	8311.1	3503.03	4895.17	2603.22	7164.48	8272.26	7380.08	7270.15	6585.39	5768.02	3859.8	7154.89	6839.94	6053.79	5409.5	9636.27	9121.92	7575.92	5159.48	7665.82	7697.89	6088.78	4386.87	4373.98	7487.61	7585.06	7703.58	5521.24	3444.73	9084.2	8674.21	7951.2	7590.79	6290.68	7350.33
AP1G2		235.897		151.554															65.8428
AP1M1	612.194	698.903	343.37	950.279		563.786	600.703	790.45	798.604	955.047	517.293		320.73	425.43	99.6076	424.537	1040.3	480.846	880.171	397.162	1054.13	1215.26	292.428	409.012	369.719	798.315	898.677	982.976			675.226	868.216	747.853	951.87	665.633	1108.97
AP1M2	198212	214490	158437	227170	108795	201553	208995	195710	199974	170650	216448	125383	212610	220410	179672	138312	187456	185053	232999	198734	204764	229633	229446	213455	210074	230192	253844	229223	219750	129751	217892	210858	205423	197281	214140	214791
AP1S1	5874.22	6336.12	4633.46	5862.02	6352.14	6846.4	7147.02	6908.77	5900.15	5052.86	5799.48	4774.22	6653.44	6353.4	5059.68	6778.83	6851.39	7476.54	6727.15	4805.46	6941.39	6584.44	5527.45	5824.54	5749.15	5557.88	6638.45	5948.66	3869.65	3681.07	6180.76	6747.23	6616.39	6088.44	5108.7	5688.13
AP2A1	9989.52	10339.9	7726.41	8757.4	7765.14	9586.78	9291.17	9399.41	9482.6	8268.55	9192.16	7518.73	9212.59	9428.87	9102.33	9454.45	10724.9	9982.21	10126.8	9115.34	9836.35	9391.82	9064.34	8220.92	8671.97	9719.47	10437.7	9401.86	9761.29	7121.63	9762.34	9996.92	9811.09	9180.18	9112.55	9392.48
AP2A2	2387.03	1914.26	796.006	1296.41	1631.02	1608.22	2486.24	1836.71	2080.48	1257.06	2256.49	1378.7	1796.66	1991.7	2045.04	1603.88	2677.97	1807.99	1934.93	1754.8	2047.57	2281.51	2048.81	1586.24	1361.97	2239.43	2194.82	2285.17	2003.74		2252.78	1763.6	2399.78	1462.22	1922.89	2273.25
AP2B1	13900.5	11740.4	7367.68	10887	11577.4	12734.9	12402.2	12144.6	13097	12816.5	14066.1	11023	13074.2	12555.1	13356.7	7620.15	12390.3	11295	11548.1	13087.8	11964.7	10351.2	10135.1	9777.51	10210.7	11480.5	11362.8	11548.3	13368.1	11388.3	12624.7	12920.8	12928.1	14794.5	11101.3	11806.7
AP2M1	15850.9	14526	9193.21	12406.2	8952.32	12861.8	14877.6	14835.6	14229.8	13714.8	15459.2	7018.82	13386.8	13752.1	14121.6	7104.81	13581.6	14512.6	13132.8	8618.01	13337.3	13418.5	14176.2	8084.88	9835.83	14047.3	12891.1	11935.9	11964.9	6986.58	13527.5	11685.8	11789.9	14156	12976.8	14029.7
AP2S1	1936.63	1902.04		1138.33		2331.78	2757.12	2149.99	1944.56	1490.58			2192.61	1796.69	1224.95		2493.87	2346.26	2264.28		2016.64	1924.79	1460.41	880.055	1002.76	2004.03	1911.65	3317.23			1901.8	2236.86	2585.87	2072.08	1559.53	2092.39
AP3B1	6384.88	5600.48	3613.4	4906.12	4058.74	5520.67	6327.38	5366.43	6692.4	4420.08	5942.06	4417.91	5002	5601.24	5754.68	3304.72	5735.98	6262.87	5547.01	4861.01	4762.35	4585.48	3968.71	3774.63	4257.72	5050.04	5637.93	4102	4656.4	4316.28	5780.43	6333.11	5724.11	6303.55	5464.79	4600.81
AP3D1	2111.42	2029.71	1545.93	1686.05	2205.48	1852.68	2227.89	2122.52	2252.05	1984.93	1780.4	1029.11	2408.96	1904.3	1540.7	2113.71	2976.92	2215.1	1567.11	1700.25	1869.68	1820.94	1553.76	864.537	1548.57	1740.95	1978.06	1853.75	1616.08	1728.13	1880.08	1465.47	2217.52	2016.9	1830.95	1511.03
AP3M1	4274.41	3361.88	2542.1	2170.97	1781.64	3777.7	3555.29	3020.99	2384.97	3396.32	3650.1	1724.03	3644.04	2699.61	3726.2	693.006	2721.22	3225.85	3621.01	1509.89	4050.43	3651.18	3466.73	2261.12	2241.37	2747.93	3946.44	3229.36	2474.46		3269.65	3506.57	2975.84	3940.28	2922.59	4197.76
AP3S1	1515.71	2058.12	2357.03	1534.13	1780.48	1686.34	1839.42	2350.31	1822.71	2451.77	2073.28	2599.61	2448.15	1904.51	2194.18	3001.32	1786.23	1636.28	2294.08		2538.38	3069.86	2521.65	1894.14	2099.18	2022.36	1714.95	1220.49	1440.21		2289.73	2133.83	2120.64	2243.26	3000.18	1954.91
AP4E1	1370.48	694.912		1326.31	270.821	1123.06	1046.12	1171.56	1213.93	1407.31	1239.5		950.48	938.126	833.709	963.342	882.234	1029.63	521.7	686.295	730.539	893.019		928.774	1047.72	1364.87	1229.51	536.218	1032.58		1187.07	1098.07	1202.54	1145.94	950.87	800.185
AP4S1	182.951	305.425					284.803	191.077			92.8265			244.871							193.481		229.384		580.982							523.529	495.223
APEH	4436.67	4497.06	3208.96	5115.94	4096.25	4010.83	3916.53	5177.84	4708.1	3016.61	4197.39	4691.57	4855.1	5670.75	5195.5	6009.75	4608.65	4314.76	4655.7	5144.13	4087.49	4418.86	4689.31	3886.98	5352.83	4990.01	5086.2	4623.35	4180.93	5731.29	3965.45	4928.38	4242.39	3904.51	4990.65	4660.72
APEX1	12356.9	14957.9	16529.9	12979.5	15822.2	17627.3	13539	14946.5	12388.4	15827.9	15974.4	19451.8	14427.8	15564	15643.8	23765.4	14794.7	13141.2	13628	15945.8	16359.2	16131.7	16901.3	19233.6	16733.8	17793.8	13916.4	15760.8	14729.8	24115.3	10434.4	13482.2	15902.8	12392.4	17726.3	13700
API5	1868.29	1750.45	2528.36	2433.46	2899.83	1862.95	1753.09	2068.74	3533.19	1677.51	2672.37	1934.99	2048.86	1803.05	2571.27	1982.61	3110.87	1915.63	2485.54	4790.66	1884.53	1001.16	1823.46	3014.16	2176.16	1481.51	1952.89		2523.76	2445.98	1820.43	2780.46	1452.84	1900.06	1686.59	1625.46
APLP2	1133.06	2062.26	1110.68	1880.55	1121.45	1690.1	974.036	1209.02	770.833	1510.83	1546.99	1284.05	1471.08	1155.89	970.247	910.87	971.083	826.27	1068.02		1271.42	1624.35	980.207	1634.51	1856.67	1516.45	1414.73	1941.01	1137.64	2141.39	1273.13	1457.7	1685.74	1272.05	2387.56	1452.74
APMAP	9533.7	9677.75	4855.54	7890.17	6522.75	8482.21	9951.03	10432.4	9251.22	9715.77	7803.74	5760.67	9912.98	8739.49	8518.08	5162.15	8632.57	8253.74	7445.4	7876.94	8306.73	7446.57	6819.03	7887.37	7374.4	9910.2	8590.7	7859.14	9372.21	5631.67	8498.58	8844.18	9586.88	8495.18	8436.09	8569.58
APPL1	1145.28			1046.04		1414.08	502.85		1108.66	1721.4	1202.26	1155.66	1209.77				1458.39	1164.17	732.461			1204.46	1163.85	1812.87		1595.67	1570.53		897.46		1347.86	1072.23	1205.17	1283.5	1577.75	1524.74
APRT	53180.9	51415.8	65572.3	47494.9	51542.6	62008.2	53254.7	54257.9	54252.8	46666.2	49052.1	55547.7	46153.4	48723.3	45831.1	39735.1	56847.8	43110	46011.1	49010.2	55842.3	53787.3	57591.8	57605.7	47722.9	53488.1	48549.5	50208.5	46421.7	34552.7	52117.7	51435.2	56867.8	50899.9	50291.5	45808
AQR	2218.72	2259.98	2023.73	2302.51	2061.32	2579.25	2139.86	2576.18	2168.76	2173.98	2123.82	1949.86	1720.39	2132	1949.46	2079.38	2169.46	2099.45	2338.3	2212.31	2399.64	2238.53	1576.52	1646.62	2109.93	2205.53	2211.07	1864.15	1995.4		2141.16	2185.74	1802.83	2126.45	1636.45	1786.38
ARAF		1288.8		801.892			1130.21	1082.26	1343.26	2186.47	1585.85		1613.25	1636.83	1040.55	806.759	824.199	930.229	923.652		1331.02				1365.51	1072.16	1488.48	1606.36	1544.09		480.454	1026.73	691.961	998.34	1547.37
ARAP1	711.418	345.386	1257.9	460.912	906.815		993.716			481.073	787.086		988.075								1109.25	941.674	1142.48	816.675	721.171	482.496		1415.76	774.407		583.054	356.795	1333.53	421.756		716.795
ARCN1	10783.7	10147.7	8883.89	9914.49	8271.13	8951.22	9575.62	8713.84	8953	8651.74	9862.84	7845.54	11701.7	10700.8	9976.91	6801.14	9839.92	11231	10663.3	6854.4	11688.6	9844.88	9463.13	9389.66	9915.84	10554	11513.3	8936.71	10069	6652.01	9640.39	8486.86	11223.1	10086.9	8998.56	10645.4
ARF4	10027.7	5735.09	2551.5		1791.14	7954.47	10796.8	5577.11	12577.9	15138.6	5729.16	1798.7	6134.65	5602.6	5766.4		3136.16	5687.52	5092.37		4321.81	7879.17			3319.5	8557.43	5100.15	5601.68		1391.75	7652.6	5110.19	7368.28	8385.02	6450.9	6763.52
ARF5	11101.5	7714.54	5661.28	6841.71	4381.81	9097.8	10824.9	8882.92	10438.6	8212.23	8749.22	5082.04	7105.95	8436.3	7556.53	4321.88	8081.47	7329.74	8538.25	5234.73	9787.85	8897.8	9025.78	5881.24	7261.14	10008.9	7216.18	11332.8	8402.93	3167.75	9648.9	7786.78	9733.86	10911.5	8720.31	10495.4
ARF6	8171.26	6784.17	1323.49	3428.04	1448.56	6653.91	7665.82	6299.73	6704.48	9565.57	5587.24	1045.09	4443.62	4132.6	4558.17	705.232	7143.53	7765.01	5089.94	986.193	6142.69	8033.62	3477.14	1660.35	2773.7	7705.96	5040.1	7385.31	4300.77	1872.34	7236.46	5202.05	8582.85	8603.24	5732.63	7555.1
ARFGAP1	2547.61	2922.09	1341.8	1757.91	1798.45	1846.23	2195.88	2101.62	2103.4	1962.8	2796.62	2598.54	1822.99	1799.97	2857.61	2485.23	1976.64	2313.93	2535.09	2518.25	2712.8	1994.49	3155.15	3932.67	2234.26	2635.82	2364.77	1660.43	3203.11		3054.12	2333.45	2001.44	2534.19	1510.28	2503.01
ARFGAP2		398.603	920.156	417.895	896.13	380.576	350.385	571.645			673.894		526.475				536.713	379.181	671.124	1291.85	407.812	634.48	718.66		530.093	208.839	807.67	622.46	554.958	729.991		426.019	947.707	347.113	628.791	791.57
ARFIP1		198.242	623.755				277.627		267.723			657.453					303.138				603.935								350.242			274.3
ARHGAP1	2581.21	2819.78	2624.06	2921.02	2393.89	4025.13	2978.97	3295.66	3472.08		2581.03	1719.05	2616.47	2966.54	3106.23	1672.31	3199.67	1997.51	2298.07		2285.09	2873.13	2319.6	2933.32	2358.44	2828.41	2460.41	2056.58	2742.23	2250.43	3273.06	2711.27	2184.6	2763.34	2924.31	2339
ARHGAP35	1160.05	846.301	897.784	1129.9	349.727	561.993	619.208	675.941	387.978		648.712		1038.47	867.609	1032.77	1290.31	716.395	719.722	1132.87		891.527	1387.55	1177.48	1098.44	711.217	619.429	1031.12	1318.91	1094.71		569.104	648.653	922.323	839.333	465.064	933.446
ARHGDIA	35129.2	28481.4	23539.1	24931.5	20777.3	30724	34800.7	34133.5	37682	29862.8	33107.4	18467.9	31800.9	26845.6	33999.7	25307.7	26137.1	28239.9	27597	21439.4	29847.5	35380.9	26435.7	23017.5	28523.3	33830.7	28086.4	16505.7	33292.5	11745.3	32783.2	35955.7	29613.6	33588.2	32731	30375.8
ARHGEF1	4009.99	4441.84	4316.51	3875.94	3130.65	4073.97	4586.22	3249.12	3932.28	5527.33	4222.99	4759.04	2546.17	4278.67	4022.2	4985.8	4272.63	3919.07	4322.94	4110.92	3373.49	4642.37	3255.2	3696.48	4056.58	4333.77	3840.17	5386.86	3824.58	7298.21	3607.41	3010.78	3669.97	3692.42	4936.47	5195.1
ARHGEF16	2610.5	2236	1233.72	1175.09	1155.19	2178.08	2472	2686.34			2309.22	1464.37	2192.52	1855.46		914.805	2582.84	2086.67	2290.18		2299.11	2041.3	2222.23	1884.52	2345.72	2555.41	1614.99	2554.83	2426.69		3586.23	2237.33	1588.68	2564.27	3130.39	1699.23
ARHGEF17	592.678	956.641		381.67	587.456							817.109		221.81			198.569		298.751		386.614		401.59			399.625		573.635	612.012				374.126			824.358
ARL1	5106.5	5374.47	7623.67	2311.07	687.608	4672.99	4916.02	3717.08	4548.55	9555.29	5220.24		3725.3	3700.16	1620.98	782.267	3916.73	4321.72	3083.25	1267.55	3795.14	4224.47	3183.79	5173.35	1503.08	6319.02	4074.94	5226.07	1696.5		5733.66	3743.29	5881.53	4616.06	2976.7	5283.3
ARL15	829.894	464.602				943.251		746.325	707.947		550.132				682.11	1130.31	1182.82	993.131			508.983		471.685		631.635	787.043	1054.99		552.908			802.267	881.048	842.675	1112.51
ARL2	4900.36	4540.45	4382.02	4499.98	3581.63	5758.85	4800.05	5119.95	4753.68	5295.46	4300.4	4421.27	4218.56	3712.36	4789.67	5018.47	5265.73	4034.44	3504.97	3209.45	4379.87	4584.21	3451.63	3379.84	4257.74	4339.15	4250.32	5292.73	4580.42	3092.61	5067.24	4972.66	4145.68	3750.99	5421.66	3185.83
ARL3	7226.1	7166.23	5259.38	7849.35	4546.59	7573.19	6183.48	7183.33	6614.19	4314.56	7453.44	5995.15	7944.54	7918.34	7541.5	8472.66	7598.48	7260.69	6753.63	7798.15	5836.27	8261.89	7138.33	7182.62	7681.55	6806.45	8693.1	7099.92	6633	2975.02	6630.4	8618.38	7219.69	6256.61	8609.96	6897.87
ARL6IP4	282.425	502.746	532.946	934.05	197.451	435.867		964.6	326.498	708.237	424.011	293.103	154.326	403.364	349.111	713.018	380.503	558.735	773.892	403.065	884.74	560.975	586.248	563.784	416.937	359.863	261.64	224.001	616.667		167.622	418.263	545.596	567.417	199.008	408.542
ARL6IP5	1535.11	946.221	325.282	788.255	575.263	2228.48	1396.7	1071.77	1488.44	875.212	597.371		849.335	1278.18	1793.86		1701.97	1504.56	1123.37	775.916	1001.99	1656.76	922.807	431.973	1065.49	1391.8	776.467		867.732		2450.93	2289.02	1403.26	1290.16	1544.52	1974.66
ARL8A	1432.09	1394.32		2109.69		2889.99			1716.99		2409.52	2610.67	1134.93	1739.63	1844.71	1735.25	1376.8	1855.24	3156.19		1668.78	1032.23	1728.94	905.285	2068.34	1222.83			1536.39		1232.91	1569.3		3036.67		2837.7
ARL8B	9660.95	8598.67	10976.5	9759.02	7327.59	11027	8961.47	10037.1	9942.17	10790.5	10894.4	14597.3	10264.1	9417.01	11133.6	6056.73	10476	10219.3	9822.27	6696.91	7924.72	9240.05	7245.34	6842.3	8638.25	9320.21	10325.6	10609.2	10479.8	7672.12	9073.95	6984.45	8861.61	8706.5	8966.24	10564.1
ARMC6	597.825	728.619	1022.8	1839.3		808.824	661.417	680.474	685.681	1796.68	706.066	291.197	818.17	842.536	867.826	412.153	725.549	1123.19	821.306	954.703	585.052	801.609	563.173	480.602	757.732	714.965	1052.97	503.131			1110.41	792.548	752.023	527.098	1371.63	517.784
ARMT1	5204.65	3992.2	2559.66	2372.42	1520.93	3296.47	4925.2	3862.36	5007.71	5698.45	3703.74	1525.95	3542.93	3910.78	3892.88	1186.28	5115.56	3547.85	2382.21	1657.84	3751.14	4354.7	3138.66	2882.52	2106.38	4067.46	3400.53	3392.37	2687.2		5180.83	3996.39	4396.37	4401.69	2408.15	4845.79
ARPC1A	5695.28	4850.78	2485.69	4987.89	2889.27	3154.58	3269.59	4216.79	3778.81	3535.36	4951.61	3136.38	4420.53	4252.38	4791.87	4506.98	4345.34	6842.47	6756.11	4802.84	5725.37	6481.39	4035.73	5658.76	4243.13	5485.62	5479.48	5024.12	4560.7	1912.13	4495.08	3739.76	5025.6	5099.29	6087.05	5489.77
ARPC1B	14409.5	16655.9	11027.3	17345.5	12597.6	12386.9	12290.4	14271.8	10669.4	15751.5	13752.8	14324	16876.4	18184.2	15342.2	18142.1	15221.9	15860.5	17427.4	18768.8	16491.3	15645.3	15841	16982.5	18963.7	15093.6	17779.5	16803.4	14586.7	13908.2	13180.5	13648.4	17257.7	13898.1	15613.3	15996.4
ARPC2	11812.6	15293.9	7686.35	15599.1	8786.92	15585.5	14182.5	12997.4	12704.5	12060.5	11829.4	7979.7	14589.5	15058.5	12212.4	12052.6	15773.5	14041.3	15354.8	15050.8	15643.5	16091.7	14957	12136.9	12512.4	14336.4	14273.4	15860.6	12180.2	6876.78	13845.3	13479.7	14005.1	12990.5	14863.7	15512.1
ARPC3	6818.34	6104.79	15261.4	4285.4	12841.7	2879.44	6019.93	3617.49	5959.92	1544.39	3337.6	7507.39	3599.47	5693.44	5807.03	5488.81	5569.77	5846.21	8050.4	7628.37	6526.04	9240.71	11151.3	12174.7	9086.75	7320.92	6188.3	6677.1	5997.65	8278.85	8734.79	5643.8	6369.42	4068.86	4574.45	5515.08
ARPC4	19290.8	18557.9	7530.26	14566.9	7977.93	14246.1	19298.1	17857	15607.3	10830.5	16046.8	9786.29	18728.6	19463	16446.9	8346.2	22187.1	21324.7	19980.6	12028.1	17648.5	18467.3	15102.5	10324.2	14160.4	19995.7	20993.3	18434.7	16360.7	5761.25	21662.1	18870.1	20138.6	18830.6	22719.4	19313.5
ARPC5	3363.17	3571.86	3184.45	4012.69	5008.4	5588.57	4118.08	4189.24	4359.83	3840.68	3909.4		3982.52	2922.79	4323.13	2194.74	5114.84	2478.28	4361.69	2835.9	2427.48	3240.24	4014.25	3868	3925.64	3146.88	2530.15	3535.87	4514.77	3431.25	4791.15	4744.57	3687.97	3850.83	3841.68	3391.02
ARRB1	3676.89	3918.13	4005.36	4542.31	3209.12	3743.66	3885.73	4043.84	3308.29	4604.65	3930.65	4130.73	4079.8	4734.24	4882.26	5259.88	4865.99	4402.75	3824.74	4145.31	4219.55	2802.37	3796.62	4480.71	4262.48	3934.71	4858.81	3228.59	3618.54	4276.63	3795.1	4492.01	3969.73	4122.44	3461.85	3368.02
ASAH1	3365.54	3341.76	2591.21	2874.05	2558.96	3120.52	3188.67	3315.29	3985.6	3258.8	3011.35	3449.32	2871	3084.63	3752.51	2959.43	2715.45	2680.38	2409.49	3162.63	2444.69	2801.51	2237.09	1937.91	2766.89	3255.3	2513.67	2908.4	2353.61	1983.35	3074.02	2904.3	2641.17	3161.92	3041.95	2567.51
ASCC3	2203.56	1851.83	2578.43	2344.38	1575.73	1901.7	2122.3	3058.19	2501.81	3230.5	2046.73	2240.2	2129.25	2204.74	2431.49	1463.81	2452.73	2652.26	2238.8	2152.58	2171.26	2478.84	2106.05	1330.65	1867.2	2789.9	2382.59	1951.2	2353.09		2061.23	1961.53	2270.14	2271.66	2398.37	2397.05
ASMTL	1309.64	1166.02	1616.27	1511.55	1127.47	1011.67	1377.37	1566.45	933.274	1639.55	1173.78	1625.47	1144.6	1303.23	1192.37	769.952	790.809	989.458	1066.75	962.122	1122.78	1459.88	1519.67	755.382	1508.46	1019.68	1247.05	793.654	1175.68	2993.67	1456.25	1626.21	1116.17	1158.64	1034.9	1071.69
ASNS	7997.66	7010.28	5156.38	7289.04	5328.26	5837.24	7650.6	7566.3	6925.01	5289.24	8080.42	5507.75	6954.77	7094.97	6602.34	5362.92	7102.44	7303.54	7825.6	6093.18	8151.56	7784.74	8092.08	5603.8	7980.25	7355.9	7525.73	7024.66	8008.03	4188.33	7557.05	6260.31	6461.39	7097.06	6716.49	7315.07
ASPSCR1	1472.76	862.063	4129.64	983.821	3901.63	838.898	1205.28	1011.56	1666.38	1618.67	1479.67	2096.46	1431.47	722.44	953.996	1193.29	1271.95	683.892	1944.46	1405.86	1512.78	1735.61	1894.35	2020.6	1153.88	1283.05	1563.39	822.575	2240.21	1879.75	1071.3	874.162	1105.42	1592.86	574.167	1242.91
ASS1	20454	20622.2	16437.6	22011.4	16566.6	20094.4	20611.6	20828.5	19665.2	20478.9	20181.7	15583	20558.3	22507.9	20676.9	15648.2	19278.4	20507.2	21195.5	19638.7	20602.1	21307.9	20464.9	19925.8	20488.7	21090.5	22275.3	22499	19814.8	11453.9	20669	18286.8	21904.6	20256.8	24340.3	23029.9
ATAD1	1505.13	2133.36	2346.66	2677.39	2332.41		2761.63	1910.08	1475.55				1857.36	974.588	1905.1	2424.59		1709.23				2600.51	2087.3	1903.34		1676.4		2042.87	2810.78		2256.98		1925.6	1947.65	2407.1	2543.71
ATG3	707.131	646.796	898.728		951.681	1289.41	919.034	683.948	1409.49		957.156	862.004	681.074	875.705		1170.59	999.005	679.61	448.292	1564.9	736.783	767.207	903.885	660.122	1438.29	626.827	1056.11			1054.87	1334.28	913.233	720.958	655.087	881.91	1048.07
ATG4B	188.581	75.4927					61.4804		315.363	331.432	222.956			304.62	178.781		386.468				212.819			100.046		297.221			93.0544				304.543	205.439
ATG7	1488.19	1562.29	4132.62	1378.8	1167.7	1336.64	1249.21	1196.98	1718.78	2827.17	1627.45		1694.84	1535.79	1090.22		1440.59	954.894	1319.28	677.761	1588.44	1487.16	1690.71	1595.97	1370.79	1175.21	1836.2	1463.06	1430.16		1303.39	1668.4	1716.58	1223.68	1187.73	1555.53
ATG9A	559.627	285.294				496.473	830.67	745.179		322.303			519.125	303.386	546.713		583.532	431.105	434.195		228.56	552.734			385.946	614.842	663.802	245.381			867.682	745.307	528.961	695.249	700.003	506.08
ATIC	45412.3	52523.4	37660.3	53625.9	40713.3	48271.6	43587.4	42944.3	44991.9	48960.4	43077.4	42935.3	48365.5	47899	45864.9	43710	41775.1	46178.8	45154.6	45101.5	48637.5	47430.9	50197.3	55299.1	48085.7	47432.2	49988	53570.5	48040.2	37498.1	41344.3	42669.8	42247.4	42738.6	45844.2	47664.1
ATL2		404.405	682.829				653.005		501.14									321.702			350.442		489.976	235.732	431.161	525.407					466.117	330.979		436.056		42.5649
ATL3	1944.12	1498.86	1650.77	1971.92	1414.37	1420.73	2061.16	1939.1	2375.35	1588.13	1644.7	2291.28	1881.49	1433.06	1524.99	1594.38	1735.64	1455.45	1717	1463.14	2025.01	2245.76	1672.53	1764.02	1420.76	1849.76	1484.98	2149.24	2301.43	2477.24	1616.82	1656.38	1731.68	2312.39	982.807	1938.74
ATP11C	344.002		606.622				534.477	634.559	373.683	866.206					910.928		329.736	521.425	384.705	372.256						615.668					753.071		452.615	496.429	305.424
ATP13A1	1179	1118.68	1131.2	1063.38	732.262	901.545	928.201	1366.87	1463.99	1739.13	1222.02	1226.11	1165.18	1279.6	1313.32	1793.4	1092.47	1037.93	978.472	827.213	1119.4	1142.59	1060.32	905.655	1148.24	1261.21	1183.55	994.52	2135.8		690.402	753.293	636.163	999.922	803.238	1178.37
ATP1A1	16989.6	15223.2	13573.4	16114.6	14104.7	15235.9	16499.9	14700.2	16038.9	14106	16271.6	15631.3	17101.7	15674	15329.1	13311.8	15845.2	15177.5	16671.4	13434.6	16314.5	16752.3	17046.3	16467.7	15399.9	14715.8	13536.4	15284.1	14872.7	14714.1	17533.9	16979.5	17895.1	16973.5	15449.9	17216.9
ATP1B1	7520.32	7161.74	9432.36	7841.79	8171.32	6189.97	7212.28	7027.48	6717.82	6557.21	7447.1	7164.13	5418.62	5980.6	8615.88	9010.59	5704.56	5397.57	7023.22	8448.22	6891.88	6526.59	6138.2	7778.79	7347.4	6041.23	8224.34	5147.58	6435.88	5018.37	7411.32	6662.04	7512.87	6514.06	6925.69	7206.11
ATP1B3	4010.67	4159.01	2400.59	3685.23	2733.08	2773.39	4450.54	3862.36	3622.63	2823.84	3497.89	2730.27	3830.75	3702.31	3391.85	1402.65	2918.47	3578.95	4034.87	2070.95	5419.09	5575.49	4430.98	2937.98	3337.48	4161.02	4938.54	4525.56	2875.07	2535.38	4457.13	3708.91	4669.98	4136.79	3740.85	4345.27
ATP2A2	15624.7	14984.9	13475.6	16092.9	15141.3	18085.3	15097.8	15996.4	14125.2	15967.2	15513.8	15896.1	15065.9	15814.1	17840.5	14117.1	15124.1	16252.5	14431.2	14711.1	13673.2	14024	15436	16644.8	14460	17202.1	15383.4	13489.5	16946.2	11781.1	15410.3	13505.3	14714.4	14631.2	16560	15769.7
ATP2A3	922.569	1172.27	1017.17	1033.54	1664.22	1142.76	928.617	1102.7	1404.04	1524.37	1320.62	1073.73	1615.44	1230.29	1127.74	1915.71	2001.85	1088.09	770.421	52.3932	1258.9	909.381	1141.57	1150.02	1347.31	1523.89	1446.36	1505.31	1225.88	1118.91	1052.08	1338.68	1020.98	1694.87	1312.18	1181.73
ATP2B1	6888.02	7348.9	8012.67	6969.03	6786.23	6099.58	6410.32	6837.75	7526.46	5263.83	6643.57	7077.23	7526.73	6996.27	7860.45	8323.01	6398.4	7269.77	7133.41	7038.28	7079.83	7232.22	7169.66	7371.43	7101.04	6840.47	7406.61	7221.84	7657.3	9384.87	6156.33	6228.61	6071.6	6317.04	6646.45	6284.18
ATP2B4	1537.71	1780.69	1419.9	3094.28	1929.29	1678.29	1532.29	2267.64	1727.35	1974.85	1508.74	1802.39	1874.72	1932.34	2177.43	1773.42	1909.15	1461.42	1777.13	2126.77	2358.12	2192.51	2129.34	2123.54	2385.59	1542.02	1873.52	1595.55	1981.87	3113.96	1930.47	1904.7	2108.88	1543.8	2259.62	2008.43
ATP2C1	820.549	737.61	762.51	1174.99	683.458	812.9	839.281	635.371	1100.13	898.226	914.435	1031.73	797.388	1208.86	594.633	1080.62	1087.19	749.803	1158.22	1172.01	772.684	908.454	1080.88	749.713	1050.46	907.496	1086.17	882.803	456.033		1016.39	1032	792.752	808.87	892.508	759.116
ATP5F1A	78699.1	80380.1	94180.2	92836.6	97699.4	77209.7	80242.8	79108.1	77684.2	86461.2	77351.5	93596.7	73486.4	71000.2	74531.6	77553.5	70871.2	68740.6	69065.2	69802.5	72293	71045.6	79030.7	103114	78581.9	84979.2	66116.5	87767.3	77241.3	103848	69466	64049.8	78732.5	69274	73802.4	69235.8
ATP5F1B	64382.8	64984.9	67563.4	68622.4	66681.9	52084.8	67368.9	60469.8	60754	51909.6	58599.6	61186.8	58700.7	57422.5	51861.1	55383.4	55648.8	53821.3	61813.5	51065.7	63771.8	67552.9	69262.9	73426.7	59068.5	63307.4	56509.1	66655.4	59545.7	55455.6	61973.1	57712.4	62579.6	59703.1	57564.3	60487
ATP5F1C	6008.47	7076.87	2740.35	5890.33	3072.56	5625.4	6768.4	7621.96	5581.29	6144.63	5032.63	4077.65	6341.33	7089.72	5824.2	3366.74	6541.39	5926.47	7318.08	5050.78	6837.19	7879.07	7373.88	5093.99	4684.87	5272.99	6880.36	8625.83	4905.72	3116.44	5710.27	5972.86	7606.03	5991.28	6434.74	5597.14
ATP5F1D	1022.75	1204.13	779.741	980.438	650.237		1590.29	1175.17	1331.96	879.837	821.478	1093.01	1080.93	430.244	720.737	812.009	511.45	1539.85	681.373		880.038	1040.19	1016.25	773.018			782.933	1241.71	467.089		1166.9	1848.47	1019.28	1411.17	781.342	858.457
ATP5ME	972.762	914.572	2219.37		1065.46	995.053	1075.67		1517.53			259.588	1167.58	899.425		1023.29		661.767	1002.55		1010.52	984.516	1069.81	1212.3	1252.34	920.503		1125.47	967.052		897.942	511.796	1400.6	503.067		961.074
ATP5MF	3697.79	2440	1322.81	2813.05	1746.42	4015.45	4436.03	2429.46	1780.48		1969.9	1504.28	2198.83	2498.33	6431.26	1608.75	2339.67	6893.81	3328.99		4846.56	3982.73	4757.28	2978.02	2805.18	2594.31	6333.9	4337.04	3554.12		4108.22	3402.38	3248.14	2711.01	981.98	3859.78
ATP5MG	12564.8	12585.4	13291.3	9063.97	10458.7	11232.3	15282.7	11786.2	11595.3	8297.13	12451.3	9217.77	11698.6	12266.2	9595.42	7677.76	13449.6	11340.8	15353.9	9444.49	13599.1	13000.6	15953	14558.7	10625.2	10985.9	10238.4	10824.7	11533.7	4814.77	17982.1	11042.9	12291.8	12568.6	11953.7	13347.3
ATP5MK	2104.56	1270.37		1079.09	955.382	1739.23	1481.3	1218.49	1439.3	2140.66	2679.56	1912.27	744.976	903.532		752.716	1961.33	1265.69	1246.44	738.637	1878.65	1082.88	1388.48		1209.77	1488.32	1224.88		653.049		919.995	842.147	1246.19	1390.57	346.327	1169.44
ATP5PO	4621.04	5127.61	4479.98	3420.45	4832.78	3918.27	4552.9	4080.2	5942.05	2863.85	5089.42	4699.45	5396.11	5317.3	5862.12	4614.81	6042.31	3936.55	5657.92	4355.92	4227.89	4082.39	4871.53	4190.19	5769.28	4803.75	4379.78	2817.07	5376.3	3430.74	5430.44	5118.85	4147.58	5034.88	3998.67	5124.46
ATP6V0A1	2755.89	2382.64	3619.72	3711.4	1997.76	2438.3	3369.69	2156.72	2435.29	1424.89	2387.85	2268.93	3404.66	2483.81	2585.49	3632.95	2497.71	2437.2	2995.45	3372.45	2653.64	2445.48	3493.09	2664.34	2712.72	3203.01	3168.44	2137.39	3457.93	2757.05	2725.52	2816.07	3478.48	2643.2	2894.56	2651.68
ATP6V0C	1609.68	1762.93	665.842	1163.45			1547.4	858.087	1285.52	741.184	802.909		1231.16	1653.4	792.331		996.697	1750.08	2073.64		2055.19	2103.6	1807.76		737.823	1354.21	1684.44	1129.64			1481.83	1502.61	2020.95	1019	635.468	1566.34
ATP6V0D1	5425.81	4503.09	5087.8	6531.68	5010.17	5714.19	5815.03	6286.67	5549.13	5674.16	6144.55	3382.58	5048.91	4945.04	4624.05	5022.55	5317.75	4731.15	4940.02	4128.4	5194.44	5699.25	5247.4	4940.67	4146.94	4754.36	4889.64	3833.07	4959.75	4253.92	4561.55	5359	5236.09	4899.35	5397.06	5311.33
ATP6V1A	5213.38	4470.17	4460.56	5033.61	3936.14	5773.62	5257.93	5563.22	4837.49	4177.74	5541.43	4309.73	4799.47	4606.33	4529.06	5568.22	4419.47	5466.45	6181.67	5041.72	5263.85	4955.42	5766.06	3857.76	5341.97	5755.77	5074.51	5587.96	4641.41	5516.1	4668.81	4833.02	4900.89	4547.35	4273.66	5035.68
ATP6V1B2	2635.34	2828.43	2341.72	2025.16	3121.63	2092.05	2361.4	2138.63	2698.37	3269.86	2318.71	1751.36	2232.01	3070.81	2598.68	2173.31	2080.26	2451.5	2417.37	2439.82	2890.73	2404.32	3107.44	2900.33	3022.15	2149.25	2848.52	2430.92	2828.36	4331.96	2474.01	2612.45	2225.04	2250.77	2086.37	2372.26
ATP6V1C1	1966.13	2553.02	1791.69	3300.62	1716.21	2622.62	1658.3	2620.61	2220.71	2654.18	2308.82	2008.94	2365.91	2124.32	2955.24	2489.7	3380	2160.75	1983.93	2534.99	1920.49	2139.93	1810.39	2137.49	2920.85	2550.43	1684.74	2035.17	2520.54	2226.88	2808.76	2744.28	1915.03	2150.68	2206.28	2362.76
ATP6V1H	1457.78	1568.68	1960.33	1422.98	1228.12	1618.54	1473.25	1406.54	1508.17	1478.42	2026.12	1319.1	987.226	1137.52	1646.55	854.332	1873.96	1271.1	1630.02	1563.75	1163.69	1147.89	1500.61	1285.86	1261.39	1037.75	836.814	757.317	1843.5	1709.23	1382.29	1427.92	1571.28	1230.71	1051.12	1357.53
ATP8B1	1460.34	1052.48		1744.46	1351.89	2218.6			1930.94			1786.55	1583.77	1290.29	1690.19		1643.8	1039.12	1783.4	1987.76	1245.44	1436.73	1675.05		1921.79	2267.87	1428.99	1700.34	1428.82	1507.8	2169.35		1439.37	1821.86	2389.58
ATP9A	875.525	662.139	1169.43	1069.71			879.244	1435.72	658.403	1821.77	1088.89	990.678	992.034	1248.36			1376.14	1752.95	1523.91		1050.22	828.963	518.444	781.719	529.422		1370.71	1071.45			1610.05	511.837	2360.07	1517.2		1192.49
ATPAF2	666.23	336.735		386.052		305.842	445.569	294.126	371.796									558.5				398.107				292.433		876.697	468.279			633.343	572.453	573.353		831.048
ATR	899.715	1058.49		1001.03		538.806	732.634	275.35	1104.35		671.322	974.664	768.502	759.478	1144.72	455.646	922.314	1144.88	1142.6	505.12	1205.93	589.658	792.325		959.16	1061.37	961.52	847.513				810.444	433.336	1023.04	915.326	695.186
ATXN2	366.103		438.792	808.966	595.3	334.626	546.596	251.165	761.138		600.737		87.2452	268.281		770.497	441.976	401.724	564.695		289.62	296.313	553.351		359.249	535.702	526.453	357.822	610.824		317.535	474.972	450.05		445.573	408.313
ATXN2L	2560.97	1683.91	3707.57	2361.03	4782.52		2693.98	2638.37	3101.79	3333.66	3132.27	3088.58	3470.49		2895.09	3619.49	2770.64	1910.2	2961.14	3800.12	1827.68	1879.64	2682.77	2907.86	1927.6	2422.37	2413.84			1968.26	2541.75	2809.67	2109.3	2387.92	2917.4	2901.41
ATXN3	1130.36	897.684		1017.43	1015.47	1257.57	965.001	1062.43	957.164	930.842	623.765	903.759	566.261	986.695	819.493	1153.44	622.432	887.881	1250.12	1021.42	1150.89	648.214	869.734	571.75	1024.5	973.565	1011.98	964.414	1097.39	1797.17	484.682	1374.22	1079.15	879.624	1152.8	1136.39
AVL9				233.454									642.717						567.028		885.646	549.767	424.305	338.571				454.821
BABAM2	1040.15	1025.66	3096.4	954.967	2243.9		804.748		951.998	781.186	670.583		873.638	1016.94	1084.64			922.261	1310.85		1562.73	1821.84	1243.36	1922.65	1016.16	788.307	1177.45	1332.16	1794.5		1302.49	608.537	1158.06	1234.75		995.768
BAG2	1371.17	1770.33	1067.47	1195.5	847.389	850.506	1335.02	1035.24	1592.96	642.627	1370.33	1708.68	1492.55	1121.79	1377.79	931.039	1510.04	711.197	1707.96	951.993	1323.32	1066.76	1397.2	767.071	1056.51	1711.64	1195.09	716.257	1678.94	912.503	1613.53	1417.95	1366.04	1086.32	1037.3	1939.19
BAG3	1513.65	1662.26	1352.57	1673.69	1645.81	1415.84	1943.36	1745.53	3243.53	2071.24	1103.9	1274.78	1020.38	1005.23	1889.37	561.402	1227.3	723.76	1306.65	1655.13	959.557	1015.89	731.42	959.546	1176.88	1337.68	1150.52	912.264	1160.67		970.442	928.383	1639.42	1297.05	951.659	1466.07
BAG6	4405.76	4758.74	4303.64	5023.01	4962.42	5110.02	4225.92	5733.35	4133.99	3155.57	5330.55	5177.04	4696.25	4516.21	4046.96	6481.96	5152.77	4322.32	5799.36	4426.79	5362.87	4516.85	5732.84	6325.04	4089.13	4228.41	4667.56	4338.65	4481.1		5540.53	5065.41	4382.21	4499.06	5017.38	4481.43
BANF1	915.268	609.059	873.108	478.93	978.818		994.721		603.213		419.013		116.756					187.942	311.717		544.175	269.509	408.609	519.651	230.003	1156.92		652.114	746.633		441.502	405.641	511.802	580.018		644.94
BANK1			878.68			1075.97			1876.64	2936.99		3233.47			2197.61	3465.29				2175.22					831.154	1222.19			2233.34	2912.42
BAP1	2841.71	3576.59	4285.26	3533.57	3394.22	2747.98	2153.16	3211.36	2024.16	3215.65	3845.76	4163.49	4351.74	4980.16	3473.5	4475.38	3887.43	4065.06	3701.91	4669.66	3667.29	3338.9	4656.63	4066.82	4950.87	3384.77	4497.79	2330.43	3911.14	5449.46		363.012		3034.33	4258.14	3995.13
BCAM	709.185	787.257	979.946	1368.8	1638.56	1050.51	962.977	1098.74	769.31	1629.54	1177.29	1366.73	1126.01	1197.98	1721.76	2014.74	734.951	870.482	1238.27	786.301	922.488	1209.1	740.477	1475.18	1032.29	666.145	669.971	1056.31	846.89	900.13	989.797	1091.71	565.012	728.696	1049.35
BCAP31	3270.77	3128.86	5148.62	2636.1	3970.18	3235.53	4816.24	3028.8	4500.82	2557.29	3760.03	4127.27	3355.64	3965.12	3323.22	3776.48	4155.77	2829.72	2784.39	4753.96	3336.91	4719.02	4212.37	4487.98	2939.29	3524.43	3511.21	3631.78	3136.37		4024.64	3285.76	2345.66	4821.15	3678.54	3472.7
BCAR1	828.126	1323.04				2037.24	1178.41	786.965	799.786	3245.6	1517.05	1293.95					1426.92	554.563	1644.68		1146.35	1188.92		2803.13	547.917	774.027	746.876	2266.45	877.698	3047.95	4426.95	1918.34	4834.21	613.547	788.17	896.339
BCCIP	2082.07	2004.73	1269.27	2295.78	1949.63	1575.13	890.648	1344.03	1333.5	1038.43	2092.56	2362.33	1908.02	1808.67	1841.16	1769.19	1784.95	815.784	1846.02	2374.74	1863.41	1789.32	2211.25	1892.01	2609.48	1527.88	1728.29	1879.92	2063.06		1319.13	2706.2	2546.8	1655	2099.39	1377.5
BCKDHA	3246.32	4309.84	3061.67	3464.6	2212.46	4075.45	4051.63	4119.22	3854.22	4230.52	3828.18	4069.14	4083.48	3802.57	3626.73	3412.51	4052.09	3673.75	3290.13	3955.54	3031.13	3919.71	3984.92	3041.79	4602.22	4110.84	4187.78	3983.26	3848.44	3367.49	3983.1	3761.23	3565.29	3880.7	4419.33	4354.79
BCS1L	781.64	719.959	623.864	719.275			698.964	969.493			844.585		827.045	872.32	711.887		450.671	1028.57	1109.53	638.542	937.694	477.951	384.411	1395.3	585.258	706.435	1038.47		1018.22		887.213	625.692		759.329	1253.16	1047.1
BDH1	8378.52	8272.68	5368.22	8756.75	5748.34	9077.54	8607.44	9005.13	8085.87	8018.44	7564.26	5658.26	8386.38	6925.13	7256.14	4807.4	8232.93	8222.48	7865.58	5845.46	7376.67	7992.46	7671.09	7030.31	6841.14	9209.16	6988.26	8649.01	7733.35	5549.56	8298.18	8233.68	7592.44	7119.81	7307.65	6927.38
BDH2	1667.04	1131.77	4471.14	1562.38	1085.49	1763.41	1143.02	1545.43	1667.7	843.41	968.895	926.668	1104.23	1386.09	1963.6	1061.18	1871.77	1605.14	747.982	1435.67	474.995	560.964	1063.41	962.049	655.556	1312.7	1536.46	1184.37	1233.93	2073.02	1670.49	1299.57	999.466	1602.2	1596.15	1398.31
BIRC6	1246.14	693.495	1698.65	1736.5		1859.86	1247.74	1917.55	1195.41		1570.3		1236.57	1057.81	2186.84	1179.08	1676	1687.57	2156.02	1212.58	1552.35	1601.71	1916.62	1690.31	2245.59	2067.51	1722.51	1669.93	1664.47		1807.36	1192.5	981.373	2103.72		1727.38
BLMH	532.794				750.313	839.317		723.016	829.757				472.171	822.537					1552.69						1824.58		3459.28	2455.39				598.197	594.954			569.328
BLVRA	13621.7	18464.6	10839.7	17061	6111.35	14272	14428.2	17147.4	12438.9	10127.7	13158.5	5455.92	19897.3	18862.4	15511.9	8269.8	17997	20249.4	17438.5	12285.5	19127.3	20430.4	18178.1	12501.4	15902.1	17642.6	16662.1	15682	14934.1	6186.06	14297.5	14727.5	16670.3	14338.6	16708.9	16559.4
BLVRB	14432.8	2372.33	12060.1	3407.85	12199.7	3842.57	12345.4	6841.5	9551.56	3206.07	13911.7	11207.5	10033.2	12370.2	14067.4	10795.6	9970.4	9936.09	8151.37	8623.8	10388	5570.79	11380.4	4770.86	10917.8	9850.16	12753.7	3784.84	12624.9	2468.02	10454.3	8948.65	9896.75	11219.2	4655.43	11048
BOLA2B	11972.2	10339.7	20017.7	8389.58	14966.2	9685.92	13062.8	9565.13	10979.3	9006.19	12826.8	22437.4	14392.4	18067	12493.5	19174.7	14448.3	18313.5	11405.4	16018.4	13783.9	11738.1	15182.2	13211.4	15322.3	10215	16014	9008.01	13449.4	23010.3	11732.2	12367.9	14090.8	11155.1	11266.1	16234.7
BOP1	1034.76	499.69	2115.24		1407.36		943.755	377.73				889.329	850.165	627.968				510.09				636.747	944.696	1198.64	614.818		494.183		1271.51			852.662	1027.96	1271.67	686.847
BPHL	1158.75	1289.65	1019.21	1152.96	507.719		1302.83	1097.12	1386.6		537.636	794.91	1180.86	992.536	694.79	935.459	1929.88	838.79	1419.42	785.742	1493.4	1196.78	1334.49	626.224	1579.02	1661	1139.03	1515.37			1813.43	1717.33		951.64	1102.51	1545.16
BPNT1	4160.32	5396.95	3378.29	5314.01	3210.61	4830.54	3654.75	5297.38	3957.67	4100.09	5442.61	3662.29	4043.48	5578.29	3964.59	3642.69	3787.27	4693.8	4487.9	3677.83	4065.35	5467.16	5092.14	4422.9	4484.58	3972.19	4297.39	4195.34	4817.22	3309.74	4064.97	4305.99	4009.39	3636.22	4631.44	4597.63
BRCC3	1924.92	2339.76	1166.65	1787.81	1592.67	1875.3	2270.14	2010.84	2217.45	930.819	3147.68	797.562	2227.76	2395.93	2046.01		2022.81	2160.24	1711.04	1536.08	2491.34	3806.43	2477.19	1919.64	2120.09	3249.79	2223.72	2662.16	2315.53	1815.38	2062.91	1667.5	1823.4	2187.16	1616.69	1460.44
BSG	2151.12	2502.65	787.489	1917.82	1335.34	2726.07	1618.26	1785.47	2151.9	1879.94	1851.87	869.249	1660.03	1602.72	1053.42	613.928	1294.78	1920.25	2512.2	1773.45	1577.93	2046.1	1926.22	1840.44	2575.77	2267.22	1653.5	2019.11	1614.73	569.679	1509.9		1812.79	2176.26	542.251	1953.38
BTF3	2413.53	1772.46	5193.72	1421.57	2164.12	1409.09	2390.66	1622.92	1777.29	1454.62	1733.47	2129.78	1051	1933.93	647.234	1388.89	591.733	1055.59	1347.6	706.075	1747.75	1682.77	2754.07	3815.69	3601.7	2508.04	664.787	1893.44	1880.72	2719.27	2127.54	1165.6	2171.83	1194.79	1027.48	2081.35
BUB3	18311.7	20105.9	15953.2	18729.1	13465.9	18809.7	18119.3	17938.1	18194.4	19442.6	20277.1	15508.1	19263.6	23092.1	17247.2	13773.2	17551.4	19044.1	19515.2	17030	18756.4	18471	18456.2	15219	18930.7	19227.3	20484.8	19625.1	19829.3	14859.8	15746.4	15779.4	16609.4	18039.1	19396.5	19545.3
BZW1	1665.43	1919.92			1686.15	1624.18	2928.48	1661.88	2515.66		2000.11		2347.94		1327.33	1028.1	2424.98	1756.45	1655.23	2179.59	1180.15	1237.52	757.706	1298.71	1476.58	1206.31	1705.92				1843.77	3982.68	1197.29	1318.29		2238.93
C11orf98	1013.78	1039.96	1322.05		937.904	337.763	1033.42	1276.82	1249.24		850.014		768.678	1230.48		820.48	726.369	1287.92	2046.89	1511.02	1472.62	1288.56	1263.95	635.881	1172.61	970.316	1233.27	1007.06			1151.21	824.42	1628.38	906.956	1018.89	1218.94
C1QA	31475.8	37600.9	39126.1	53727.3	36220.9	36329.3	24439	30678	29012.4	62671.6	37700.4	44466.3	43362.8	40262.1	38277	38765.2	36061.5	40623.5	46501	53699.5	39017.7	45900	44090.7	56365	41429.2	38273.5	42977.1	70278	46290.8	53399.2	35716.6	31684.9	44307.9	27601	44937.3	51808.5
C1QB	9443.57	17303.5	3532.88	14486.2	1890.32	6177.86	10263.4	8534.54	4647.71	8339.83	7113.56	3157.25	13921.6	14547.6	2596.75	2201.85	10861.2	16236.2	20261.5	5315.46	21264	27279.9	15012.4	10624.6	8209.37	10329.3	21090.5	45483.7	9576.75	4775.22	13458.6	13437.8	19276.7	8266.13	12358	16118.2
C1QBP	956.058	644.058	1185.93	925.466	1172.45	1092.46	899.659	1311.2	1532.13	1576.38	630.517	689.317	796.816	984.163	807.547	1179.9		835.497	1257.76	607.668	1058.77	938.973	1036.57	578.134		1031.72	922.071	620.853	1283.29		1116.64	1238.46	1037.33	1372.18	547.324	998.663
C1orf198	245.234	656.021						541.62	325.065	503.308	270.461		401.837					526.837	669.039						663.98	740.451	799.355						374.654
C20orf27	3174.73	1727.3	4101.34	2361.48	4469.33	1527.06	3404.32	3473.77	3281.26	3663.66	4733.45	6284.49	4617.96	4682.48	4692.7	3770.17	3602.97	3237.62	4238.65	5089.99	3363.12	2910.07	4119.81	2056.01	4051.12	3203.18	5513.8	1371.42	4172.08		3990.27	2310.93	3378.39	3812.73	2773.57	4717.77
C20orf96		24092.1	29425.3			29807			26521.2					35296.1	25940.5	40595.4	24900.2	20402.2			17958.6		24926.7		29544.4		37203.2	34638.7	33900.6				23267.2	23618.5	32714.9	29337.7
C2CD5	1083.15	1331.23	1015.63	1286.29	1372.51	1245.05	1757.97	1114.71	1278.24	2033.69	1414.78	1323.71	1308.69	1270.23	987.882	979.006	2015.79	1224.53	1021.37	1249.28	1423.11	1244.94	1130.32	1266.95	1502.91	954.446	1713.22	1437.34	1356.61	2064.45	1377.47	1343.53	1750.74	1058.59	1454.25	1199.38
C3	2461.64	3845.07	2243.74	4274.01	2026.58	2202.36	2374.19	2702.72	2755.73	5606.53	2874.13	2743.52	3567.68	4030.91	2450.88	2543.22	3011.28	3639.08	3831.38	3318.09	3267.52	4438.21	3683.64	4108.88	3466.59	3469.96	3860.35	7912.77	3593.99	3092.89	2924	3249.83	4556.82	3048.04	3778.73	4648.87
C4A	1402.98	1685.11	459.912	2262.27	547.176		1081.36				1468.99								1348.33		829.49	1292.27	837.021	745.837		1725.4					1251.7		1393.5	1264.97		1984.92
C5orf22	1640.13	1910.28	3164.08	2226.4	3453.65	1248.02	2206.77	1973.5	1918.71	1209.14	1377.66	3019.99	1350.1	1822.96		3079.1	1845.02	1251.23	2008.63	1844.67	2696.26	2321.9	2322.95	2643.51	2283.49	2136.87	1856.42	1936.94	1475.96	3137.45	1294.41	1775.15	2333.86	2383.21	1546.5	2433.96
C8orf82	2393.94	2340.69	3485.24	1952.65	3059.98	1871.66	1355.69	2140.12	2482.44	2707.53	2281.85	2059.89	2429.62	2244.66	2843.45	1429.45	1658.36	1305.33	2139.68	2202.31	1787.15	2177.46	1861.15	2091.53	2600.59	2081.92	2281.03	2558.98	2830.08	4159.77	1619.91	2329.87	1858.56	2286.16	1247.43	1540.82
C9orf64	3470.03	3737.96	5061.73	4721.13	4970.37	4685.38	3122.75	4102.41	3421.77	6278.96	3765.44	4645.72	4193.32	4642.08	5558.4	4411.79	3725.01	3803.23	3828.54	5572.91	3138.46	3719.4	2188.66	2518.01	4801.8	4260.52	4686.9	4052.76	4137.97	3481.43	3488.02	3851.49	4157.33	3515.55	4036.41	3333.85
CA12	3842.86	3763.23	3913.47	4989.82	3895.05	4522.17	4608.57	5067.07	5272.23	3737.85	5148.72	5776.83	5215.57	5648.17	4332.12	5032.13	4940.17	4328.33	4919.54	4928.31	4597.53	5091.07	6030.18	5939.56	6253.6	4880.07	4696.87	4061.18	4733.33	3759.63	4827.8	5020.63	4540.31	4415.7	4158.72	5969.98
CACNA2D1	6665.3	643.021	9173.8		12004	5616.78	7479.5		2320.66	9336.88	5109.81	5864.86	2030.36	7927.6		681.398		7086.96	3803.77		3548.94	3604.29	6801.4	8285.76	7158.29	8719.91	6457.18	5438.69	10585.7	14366.3	5048.37	7998.66	6247.54	3578.59	3850.58	5739.54
CACYBP	26650.5	25125.5	19384.1	24695	16718.2	23090.4	25490.4	23681.4	24704.8	21453.2	26772.3	12912.8	27679.9	28026.9	23055	18779.6	27789.5	29600.7	26434.2	22424.2	26410.7	29082.2	26460.9	21730.3	22725.4	23995.1	26888.7	26558.1	21741.4	16002.4	23430.4	22923.4	24603.5	26519	26241.6	30950.4
CAD	9562.81	9567.98	7323.86	8224.85	7056.9	8110.1	9751.33	9870.77	9300.26	9216.92	8919.5	7400.19	8288.26	9687.81	9490.69	7201.61	9339.3	9723.43	9955.78	8393.82	10818	9972.48	9627.33	9337.04	9080.64	9985.99	9621.12	9898.59	9176.79	6012.12	9711.88	8650.09	10179.2	8777.45	9217.86	10523
CALR	4967.22	1860.01	2505.17	2984.92	4501.63	2827.8	6240.96	4055.34	8067.84	1910.21	3816.5	3193.77	3899.88	5023.83	4385.72	2788.21	4247.05	5000	5732.99	3523.5	4260.48	2604.95	2989.51	2478.29	2454.85	2914.09	3987.97	1098.91	4224.35		6916.14	5907.31	4033.25	6287.61	2721.8	4165.19
CAMK2D	1083.63	1154.19	633.522		555.741	1278.77	992.589	1031.84			801.103	1078.39	994.106	1552.7		944.459		1277.06	983.587		701.3	820.531	1380.11	780.996	1247.95	1400.23	1348.36	1295.51	713.003		711.891	919.012	700.25	279.445	1343.82	1048.32
CAND1	21067.1	19986.8	11773.6	12302	10760.2	18442.2	20695.9	21367.4	21171.1	10218.6	19835.2	9249.04	17626.7	17507.3	17678.4	11111.8	20891.9	18646.1	21600.2	11387.4	20043.8	19708.7	18903.9	13302.8	15144.7	20630.9	17814.2	15873.3	18893.6	7243.69	22191.7	22276.7	20163.5	22384.4	14504.6	20142.3
CANT1	554.685	395.172			352.389	1389.27	179.481	705.235	327.672	421.619	296.384		402.398	605.584	619.591		1187.93	526.426	637.499	1101.29	271.098		415.002	396.137	1229.09	457.439	916.603	193.868				633.887			1229.29	227.907
CANX	14139.4	18374.8	15066.8	19296	13148.4	12272.2	14693.3	13555.4	13533.9	8260.95	11605.6	12679.5	16182.7	15988.3	10944.9	12875.5	16023.6	16937.6	15056.7	18379.2	18914.9	18432.3	19409.4	24015.3	17702.7	14050.3	15810.1	18188	12258.2	12399.3	14742.7	15606.9	16862.9	12137.2	15711.6	15070.3
CAP1	7630.23	6805.53	5837.32	6076.97	6142.89	7279.03	7259.3	10571.1	8217.13	7279.11	8285.86	5839.55	8163.57	7151.4	8595.66	4800.69	8106.42	8372.03	7199.65	6000.64	8551.02	7472.29	7233.61	6351.77	6210.14	7172.43	6671.39	5423.2	6594.77	5336.76	6515.97	6741.24	6320.63	7749.81	5940.79	6933.72
CAP2	6169.99	6425.14	6150.2	6572.49	5645.8	6487.94	6510.98	6474.89	6651.26	7590.33	6550.4	6318.19	6585.02	6304.81	6956.43	4504.52	5943.77	6395.53	6845.62	5006.41	6217.25	5794.13	6882.35	5681.33	5467.31	6640.42	6121.56	6535.41	5857.88	5929.62	5357.37	5294.55	6258.57	6216.85	5328.49	5816.34
CAPN1	15473.2	14853.8	17163.2	15607.4	14638.5	15458.3	16254.7	15259	15178.5	17758.8	14933.7	13165.6	13900.2	14672	15820.8	14655.9	15408.2	14412.1	15210.6	16377.7	15155.6	14661.9	14373.8	15249.4	16622.1	17077.2	15722.4	16037.7	13846.7	14057.3	15546.6	15507.4	15692.4	14589.5	15672.1	14254.6
CAPN7	1149.28	1130.74		1077.11	811.223		1259.94	1314.32	614.956		855.68		1183.6	1270.99	1073.14	1202.72	902.319	848.358	1110.87	889.512	1148.35	1478.17	1695.3	1278.61	1359.34	1515	1443.29	1597.79			1058.5	1096.32	1243.67	806.187	1154.32	935.534
CAPNS1	2492.81	2459.89	2436.86			2300.14	1981.36	2428.89	2275.92	4104.87	2652.1				2899.22	1145.26	2277.58	2453.6	1721.25		2160.18	2554.88	2269.17	2035.7	2153.27	2454.14	1830.7	2531.9		1234.06		2226.17		2288.16	2215.16	2256.61
CAPRIN1	5816.29	5137.6	5140.3	6413.82	4627.35	6000.45	5281.08	6724.28	7298.58	5333.45	4747.42	3613.49	4450.2	4833.07	4633.87	4873.77	4538.38	5177.84	5158.24	3242.92	4264.19	4585.97	3561.47	3962.52	4901.41	3710.43	4586.37	5433.2	4826.61	4728.11	5102.16	5873.72	4506.08	4805.9	6343.71	4657.1
CAPZA1	6504.58	6019.59	7246.63	6368.63	5500.4	4856.9	8387.58	5581.88	8464.72	6648.23	8387.32	5342.98	6107.82	6572.92	6150.88	3173.19	6793.23	5810.91	5807.9	2995.1	7042.13	6808.04	7386.67	7806.88	5544.91	8124.52	6555.11	5667.95	7976.03	3887.62	6437.3	5640.32	6131.87	8261.6	5298.87	7113.6
CAPZA2	2464.93	2180.64	398.28	1677.05	643.373	1276.01	2130.89	1479.84	1825.64	2842.88	2372.55	541.409	1231.87	1238.54	1757.25		1186.47	1797.04	1143.02		1685.5	2131.47	2023.53	668.059	834.734	2066.26	1256.27	2016.28	1698.55	672.671	2109.79	906.697	2031.46	2315.79	1231.09	1906.25
CAPZB	25572.4	21654.1	19535.9	18519.7	20426.3	23317.2	24218.1	19674	20444.1	15846.4	21912.3	21879.3	24545.4	25484.2	24042.6	20078.6	21924.1	23564.3	21980.1	22158.5	25432.6	24039.3	22568.3	18155.9	20424.6	23447.8	22841.8	19996.6	18150	21862.1	26028.1	21563.6	23237.6	23236.4	23713.8	26052.2
CARM1	5494.08	5172.98	3527.53	4885.04	2637.61	6312.39	5642.76	5920.58	4901.23	5966.45	4813.59	3001.73	5776.88	6722.02	4302.21	3608.96	6597.58	6399.4	6004.68	5022.93	5761.49	6001.75	4096.41	3637.59	5838.53	6419.56	6892.96	6294.16	4835.04	2534.64	5949.22	5382.17	6439.75	5380.81	5058.9	5414.07
CARS1	1885.88	1560.09	2163.09	1505.51	1535.05	1036.8	1015.21	1869.29	1489.97	1554.28	2028.11	1554.84	1196.74	1310.14	943.245	1215.76	1152.87	1430.4	1448.36	1482.15	2185.9	1300.47	1596.07	1462.5	1493.31	1289.02	991.842	1426.57	2121.68	1231.7	1448.42	1552.72	1444.2	1269.59	1737.97	2623.66
CASP6	4383.47	4007.79	3222.83	5413.58	6105.83	4690.03	4735.5	4840.18	4524.74	3280.99	7566.56	5594.54	4366.46	5875.08	5813.8	7197.88	5366.59	5169.06	6254.85	6316.7	5474.48	5252.78	5256.83	3643.65	5060.67	4236.45	5717.04	7065.63	5506.61	4490.31	4763.36	4454.25	5594.6	6171.54	4450.99	5630.92
CASP7	1386.35	1742.98	1746.2	2798.85	1425.4	2340.75	1354.69	1937.88	1259.58		1251.33	2522.4	1246.55	1883.52		3696.02	1841.9	1816.36	1980.54	2062.25	1765.35	2123.57	2204.48	2487.85	1974.41	1365.91	2452.1	2237.08	1692.84	1407.43	1918.51	1899.27	2000.43	1368.63	1929.37	1878.79
CASP8	575.634	1391.64		835.37	1254.01	1370.25	1531.47	640.604	1065.59	2674.99	674.789	1652.07	1908.8	1235.57	1090.91	1448.55	1212.56	1094.38	974.592	1868.84	943.031	938.729	756.815	2050.35	729.379	1009.95	1487.22	1270.96	467.886		1671.36	1478.15		650.974	1104.34	1028.13
CBR1	14224.2	14638.9	13064.6	15278.6	14440.3	12375.9	14890	12365.6	13248	15616.1	13533	12070.1	11813.6	15453.4	14588	9496.9	12653.5	11357.6	13517.6	10317.4	15634.7	16303.6	15357	15686.7	11694.5	12997.9	12409.6	16087.8	14081.6	12104	14981.4	11850.4	16565.7	12243.5	11809.4	14028.3
CBR4	1153.58	1232.98	383.767	1376.6		1586.79	932.597	1109.49	1669.32		1125.99	924.818	1474.06	1111.67	1541.45	738.331	648.149	719.59	667.078		292.18	707.288	1116.09	1165.79	996.441	1475.09	670.97	994.854	1712.99	827.798	792.426	928.648	783.625	1059.4	1329	822.076
CBS	9014.44	9235.98	7280.83	9677.55	7823.69	8772.02	8931.81	8372.71	8314.27	8839.08	7630.42	8890.9	8907.63	8531.18	8369.63	7598.21	9309.1	8294.95	8736.44	8800.82	9624.82	9302.93	9546.36	9416.14	8745.43	8925.38	8848.31	8374.78	8330.83	8257.33	8397.08	9418.68	7508.2	8486.77	8826.78	7615.95
CBX3	406.541	477.142		951.262	444.876	432.515		268.321			805.823	406.202	434.839	460.743	288.187	307.023	812.281	252.162		519.783					501.14	291.017	236.097		383.656	227.55	460.596		178.148	309.018	578.503
CC2D1A	1927.87	1988.61	2433.53	1765.65	2439.18	1535.24	1995.08	1400.78	1628.24	1997.21	1631.37	2417.38	1830.46	1898.13	1466.19	1825.03	2206.08	1590.1	1880.44	2314.53	1894.51	1830.95	2083.43	1994.05	1622.59	1670.64	1778.64	2035.93	1790.12	4011.11	1607.91	1763.47	1356.7	1633.93	2031.76	2010.01
CCAR1	1507.78	1792.87	1154.51	1257.78	1475.14	434.935	1420.46	1565.7	1307.76	1440.37	1741.67	1239.91	1606.29	1724.97	1927.55	1356.25	1416.97	868.221	1184.43	1174.39	1667.74	1475.65	1967.73	1449.77	1290.24	1506.17	1448.66	1219.27	1639.89		1326.39	1596.39	1336.54	1661.69	1448.77	1511.11
CCAR2	19009.8	17370.5	23580.4	19529	21001.4	15959.1	19986.6	17586.8	17188.7	13283.2	17817.2	18165	17719.8	13964.3	17312.6	16396.5	15794.7	16738.1	18143.4	16078.9	18370.8	15482.4	20782.7	17671.1	19368.4	18279.3	18348	17261.1	16868.2	12764.5	17503.5	14810.5	16398.2	16840.4	13823.3	15943.6
CCDC25	786.586	528.354	718.147	501.779	748.845	1144.16	454.114	539.63	640.64		651.76	492.058	852.453	1365.36	606.318	723.484	552.469	423.797	717.255	738.593	583.71	746.141	702.016	870.074	1211.77	766.856	462.216		902.936	693.748	409.893	392.321	575.522	482.54	605.145	598.449
CCDC47	2606.05	3296.35	2931.58	2901.23	1733.55	2876.77	3071.6	2726.9	2382.62	1147.16	2460.04	2168.39	2714.97	2645.05	2338.87	2838.54	3088.52	2891.73	2506.98	2008.52	2933.61	3233.8	2884.92	2277.35	2365.53	3387.65	2981.81	2814.32	2097.17	2637.15	2932.75	2549.07	3251.58	2524.43	2546.6	3075.19
CCDC6	995.173	663.405	819.501	1217.78	1033.05	1068.61	887.808	1306.92	1072.57	1117.21	1164.68	811.439	1109.67	593	1114.61	1114.34	860.958	1109.77	978.837	1701.46	589.035	914.879	1334.35	1050.48	1317.65	1144.43	1062.21	598.022	1152.53		1206.54	859.139	1003.42	1521.99	1088.8	693.015
CCNT1	2208.97	1060.85	884.354	1758.34	1064.79	1930.24	1492.44	1739.52	1480.73	2122.75	2576.42		2383.74	2549.23	2072.11	1658.03	2986.43	1915.51	1873.22	1611.94	2287.25	1751.03	1687.69	1020.37	1548.76	1606.71	2078.31	1745.1	1631.99		2503.05	1753.95	1674.09	1661.18	1765.7	1936.14
CCT2	22794.9	26577.5	18866.7	25886.2	20990.3	22464.3	23603.5	22957.9	23406.9	19894.8	20869.4	19225.3	23547.2	22490.7	23373.6	15595.6	23907	22591.9	23234.7	18849.9	26221.5	26943.2	26941.9	26596.2	21058.6	24985.4	21881.8	24509.4	23010.3	17222.5	24849.7	21665.1	23640	22532.7	20044.2	24131.5
CCT3	27622.5	20627.4	24496.9	20094.5	24876.6	21146.1	28453.5	26009.4	24700.9	13402.8	23994.3	25726.8	26019	22342.2	26398.8	26117.4	27709.3	23359.5	27220.5	22514.7	27018.4	22956.9	25657.3	26477.5	23602.2	25014.3	21049.6	15710.4	26348.4	18573.4	26371	26475.1	25541.9	24728.2	19945.1	24245.6
CCT4	38592.2	36995.4	25123.1	36015	25609.1	31609.5	38593.8	35039.5	34948	24630.6	31710.4	21900.7	32386.5	30805.5	29734	21913.4	32190.6	31560.7	33478.4	21848.4	37262.8	35886.8	34849.2	33858.9	30741.4	37225.8	29453.5	36072.1	33261.7	25518.1	37694.6	31291.6	34720.3	34365.4	32218.9	33163.4
CCT5	31869.9	30703.4	27628.2	29072.1	25948.7	26796	32437.7	27777.2	27117.2	19572.4	26649.6	25387.7	28480	28788.5	24543.5	31539.9	29600.3	27128.4	33306.1	24058.6	34346.4	32841.1	36461.3	35647.5	28963.2	29966.6	30244	35237.6	25320.4	26741.5	30212.5	29882.5	30317.9	29156.6	29793.2	29215.9
CCT6A	17272.7	20387.7	16126.9	18646.6	16936.9	15261.9	16294.1	17038	16586.6	15828.2	16138.8	14840.5	15317.8	17095.1	16599	12002.1	14406.4	14259.4	17694.7	11438.5	18753.8	18783.3	17843.9	21157.4	15276.1	17534.2	15364.7	17548.4	17983.5	16986.8	15984.5	14464.3	15686.9	16845.8	17087.6	17132.5
CCT6B	17766.4	22001.1	4336.79		7083.88		16045.4		21009.3	22356	16225.5	13252.4	18296.6	18177.9	22981.6	17757.2	22305.1	21846	13568.6		14717.1	12414.9	15027	6787.96	24140.5	15380.1		16100.6	16015.2	2901.35	18325.2	28638.5	16959.9	18008.1		15483
CCT7	29459.6	23684.9	29115.5	26189.3	27343.3	20506	31292.2	28475.4	28511	16536.8	27933.8	26670	29515.7	28575.4	29836.3	25604.2	26630.1	27572	27202.8	28152.8	29121.1	22655.1	30511.3	26692.6	29484.8	27804.5	26932.9	13338.5	26635.2	15943.3	28215.5	28297.2	28772.6	28963.8	22511.4	29360.5
CCT8	74106.9	73424.4	55336.5	69722	60584.2	71284	74358.5	74895.3	74819.1	68565.9	70421.4	59425.2	69459.2	68547.3	68050.5	53039.6	72105.1	63572.1	70207.9	61253.4	71300.9	72891.2	69704.3	61792.1	69212.3	78205.9	66242.5	65422	74014.6	53063.6	76819.2	78567.3	72542.3	74562.9	67162.1	63989.3
CDC16	1033.24	1741.73		1848.92	689.33	712.854	1095.63	966.908	1093.44		1063.87	1098.86	1065.74	1179.2	640.848		864.836	997.757	998.062	715.668	946.749	1379.74	990.214	1320.08	632.403	1159.46	1015.35	1331	1128.03		1105.24	1055.97	820.534	1507.39	1271.42	932.007
CDC27	468.635	282.324		498.671	449.506	362.408	690.211				870.852	847.881	426.408		639.774		422.329	539.833	662.028		397.84	389.526	567.326		1018.5	567.982	280.487		840.82		696.03	1121.94		665.22	556.654	628.463
CDC37	10846.8	10785.6	14559.6	9475.85	14581.4	10058.4	10975	11562.6	12281.7	6748.87	12355.1	13485.4	11849.8	10301.5	12957	12982.7	11751.6	10871.8	11142.4	10911.1	10591.7	11283.7	10662.9	12330.9	11482.5	9821.26	9830.54	4363.9	11637.2	6521.62	13631.3	12821.7	12260.3	11161.7	9583.55	11183.5
CDC42	2966.52	2170.72	4219.04	2946.2	3787.36	2801.36	2689.4	3661.14	3024.31	2735.93	3008.6	4514.98	3373.37	3300.23	3963.89	4816.54	3327.51	3998.13	2770.51	4516.86	3358.9	3221.39	3496.26	3923.17	3536.27	2942.12	3382.25	3426.23	2830.46	4858.6	2365.43	2217.57	2854.74	2709.02	3470.63	3286.88
CDC42BPB	308.139	516.972							513.073		282.652		293.065					280.402	396.449		375.562	473.193	333.814	450.446	779.033			405.192			480.472			291.327		798.345
CDC42SE2	367.383	538.415	612.136	419.787	276.816	778.82	307.425	762.151	668.025		735.229	718.475	450.358		650.591	507.96	583.228				655.405	595.017	1009.99	239.087	610.37	504.711	479.268	831.699	288.85	669.661	477.723	619.648	556.793	528.017	311.329	502.029
CDC5L	145191	164869	211011	236659	173610	216440	139009	203158	127149	296448	152891	181008	212116	233072	187329	171010	184833	194052	196740	244589	162019	191106	225099	236775	202755	200178	200829	213571	193669	269184	180654	162498	151347	147066	238408	205325
CDC73	1885.03	1996.8	2466.87	3085.24	2839.15	1508.41	2079.17	2213.2	1573.35	982.568	1620.27	2648.83	1793.1	2318.21	1937.5	2147.1	2036.57	1510.54	2044.79	3309.84	1852.41	1679.29	2442.28	1913.29	1814.97	1558.23	1615.78	2829.94	2515.02	2023.12	2087.54	1859.89	1930.48	1204.09	2100.87	2344.87
CDH1	2032.16	1740.65	1814.24		1573.99		2121.76	2001.47	1757.14		1779.21	1858.94	1878.27	1368.74		1512.3	2288.43	2224.35	1329.25		1492.21	1615.94	1330.21	2242.48	1099.17		1887.97				1434.68	1453.02	2143.07	2013.02	1758.52
CDIPT	3097.73	3395.39	1138.29	1699.83	1205.89	2227.62	2763.13	2935.95	2703.25	3445.15	2923.4		3310.08	3473.86	2968.76		2481.56	2559.72	3761	1694.61	2156.45	3884.07	2788.74	2007.05	2390.55	3836.17	2433.33	3411.85	2344.96		2507.06	2685.53	3291	3021.21	2653.35	3463.41
CDK1	6841.12	7380.99	6754.97	8097.58	7001.75	7313.57	7822.68	8915.11	7504.37	8794.28	6720.79	6087.39	7431.84	7046.58	8782.27	7730.5	7191.38	7170.7	7265.47	5815.54	7826.01	7992.55	7097.72	7622.71	7986.18	8322.04	7373.21	5704.84	8450.79	4985.03	7118.88	6818.77	7377.24	6701.15	7026.33	6033.71
CDK2	2511.94	1757.09	1347.98	1185.22	2030.82		2039.99	1300.09	1323.33	1419.22	1105.71	819.563	1606.3	1695.29	1783.24	1284.47	903.777	1100.1	1326.04		1653.32	1262.83	1581.06	2060.21	1468.62	1171.97	943.523	1626.69	1119.74		1509.24	1286.61	1488.73	1701.55	1032.09	1706.35
CDK4	3847.63	3708.04	2896.78	4133.15	2239.96	3584.35	3348.53	3961.6	3352.53	2967.43	3544.53	1994.79	3763.89	3946.59	3232.36	1847.73	4051.97	3366.86	2581.93	2392.26	3299.16	4049	3715.12	3668.14	3804.6	4255.65	3200.84	3956.87	3438.83	3135.24	2979.52	2547.46	2716.57	3271.59	4351.93	3450.54
CDK5	2593.8	2462.93	2077.31	2687.25	2453.56	2066.28	2393.36	2398.54	2526.16	3346.4	2120.99	2350.16	2904.83	1979.18	1969.51	2102.1	2532.62	2443.8	2343.31	2340.39	2492.49	2798.63	2909.53	2442.17	2530.6	3347.3	2119	2355.97	2616.08	2136.69	2022.02	2071.49	2365.18	2147.07	3054.37	2453.45
CDK9	2976.42	2369.8	1910.66	3831.48	3979.48	2901.18	2164.36	2092.42	2677.43	3754.25	1761.81	2984.34	2726.94	2134.7	2623.97	4128.64	2899.2	2754.15	1890.37	3894.67	1932.69	2328.97	2003.57	3221.91	2759.25	2866.82	2462.58	2622.26	2617.02	797.031	3497.58	3519.41	3881.54	3119.2	2535.42	2292.54
CDKN1A		558.094	973.115	536.986	1117.5	394.115	560.637	190.66	437.158		401.058	921.315			637.33		469.803	435.437	455.689		460.656		520.931	565.945	238.32						222.281	564.357		314.102		225.764
CDKN2AIP	1138.62	1271.55	1375.29	1321.34		1921.38	1325	1980.29	1291.25	1432.74	1644.57		1427.46	1455.22	1775.78	1444.93	1699.04	1237.32	1618.11	1381.76	1421.31	1211.94	1048.88	1613.54	1317.75	2048.56	1254.11	1470.97	1659.01	1508.57	1882.69		1432.39	1349.1	1238.13	1239.94
CELF1	1889.24	709.065	1298.85	477.566	1757.76	938.827	2494.13	1512.6	804.518		2268.98	1219.18	2204.23	1460.27	1632.8	1572.75	2746.11	2092.38	1942.82	2178.62	1600.79	848.917	1550.35		1088.7	1321.93	1018.34		1699.25		1402.66	1424.61	1567.97	1863.96		2617.73
CELSR2	436.377	853.887			295.209	571.616	509.019	537.615	847.86		483.967		628.216	885.483	815.904		608.819	672.544	884.876	479.473	678.013	532.293	344.703			645.693	814.412	615.5	405.976		453.422	630.641	1300.85	655.507	854.628	313.613
CEP350	1784.02				390.125					782.524			2190.3	2599.64	680.553		685.531					1821.88	1215.85		899.023		2048.39					2999.43		3384.75
CEPT1	5905.88	5341.09	9215.64	5123.26	8870.48	4251.13	5982.74	4515.49	4332.22		4648.58	5195.44	5456.82	6492.97	5312.6	2835.88	4244.59		5267.11	2847.48	6576.27	5004.44	7228.13	7273.95	5828.15	6690.2	5922.5	4642.77	6240.03	5434.71	5508.37	3126.99	4028.79	5507.18	4261.78	6659.72
CERS2	2601.69	1964.96	1941.38	2891.02	2145.3	1434	1689.02	2172.22	2784.85	2457.36	2586.56	3179.3	3142.08	2305.23	2913.6	3745.23	3238.27	2773.47	2565.23	3926.86	1976.54	1700.69	2256.72	1975	4084.94	1897.09	3911.82	2014.24	3361.87	2526.21	2433.74	1882.92	2299.87	1881.65	2099.06
CERS6	399.124		1064.44	454.359			324.855																718.626	1046.67					565.758							406.898
CFAP20	2888.38	3059.41	2211.86	2765.81	1593.65	2276.83	2536.08	2246.53	2780.38	2820.25	2429.52	1816.53	2348.83	2350.43	2402.52	1188.38	3220.03	2579.05	2318.05	1459.33	2904.63	2430.69	1720.99	1575.28	1589.55	2062.84	2727.91	2450.27	2697.24	1385.5	3087.28	2736.43	2468.75	3108.44	2803.72	3116.03
CFL1	21575.6	15416.9	16366	15702.5	21935.8	9191.38	22942.4	19697.2	19293.3	5876	18378.9	18299.2	21082.2	23308.9	18251.8	23010.2	21927.8	22359.3	18350.7	24844.1	23522.2	20812.7	21493.1	22818.1	21248.4	21074.2	18549.7	3628.36	14896.6	10581.4	23177.4	22439.6	23086.8	18446.3	16602.7	20201.1
CHD4	484.66	505.588					372.033	393.859						83.1956					461.085		657.934		932.48			410.708		640.649				746.26		227.746	740.504	656.914
CHDH	1489.42	1768.27	7818.83		5049.42	5977.19	2251.87	4966.24	4754.9			4587.02	5001.85	4651.34	6399.43	5188.07	6065.26	6220.85	3350.15	5618.79	4189.66	4170.41	4459.92		4371.61		8083.78	2533.79	4937.31	4623.56	3608.04	4965.35	3900.77	2324.71	6914.8	5065.88
CHEK2	1984.55	2181.69	3530.71	3603.29	2280.96	3048.46	2611.17	3085.42	2811.53	2276.08	4891.01	3937.06	2693.83	2979.53	3269.08	3946.42	3245.03	3324.08	3360.73	2401.37		3117.37	3134.28	1860.6	4396.76	3725.2	3863.45		3884.25	4042.74	2488.7	2060.09	3565.03	2935.61	2761.82	2342.47
CHID1	494.5	833.288	757.942	668.263	582.887	620.905	489.934	582.711	322.788	1010.05	416.933	372.624	689.153		803.435		343.963	496.512	505.863		736.105	703.372	506.01	739.877	784.092	572.063		845.915	891.027		618.63	386.95	430.38	693.68	515.586	278.085
CHORDC1	2973.75	2952.3	2913.04	2535.52	2048.52	1828.07	2577.11	2158.8	2370.6	2647.15	2661.75	4072.03	3041.55	2654.7	2731.8	3262.79	2762.66	2653.4	3170.02	2102.8	3124.26	2493.9	3327.86	2940.17	2885.58	2397.61	3730.91	2613.78	2815.04	3511.63	2307.88	2031.23	2462.91	2556.52	2675.71	2741.24
CHTF18	957.031	739.079	2077.59	656.12	1153.1	1303.39	1100.33	985.019	909.256		739.914	1228.16	1012.81	1448.04	1106.52		825.612	953.782	1430.03		1023.72	1407.02	1731.35		1228.07		911.656		942.395	1074.65	1339.8	719.871		955.07		916.887
CIAO1	3518.73	3770.34	1407.73	3533.31	1554.43	3404.78	3767.35	3340.11	2875.04	2897.77	4125.91	2268.91	3998.25	5092.74	4041.15	2244.83	4678.19	4306.16	4703.94	3219.59	4029.38	3606.73	4519.34	2653.76	3291.13	3939.23	4631.96	4470.42	2473.05	2685.86	3104.14	4566.91	3290.92	2758.79	3914.71	3917.04
CIAO2A	951.331	1044.98	1199.05	1260.91	924.8	923.282	520.313	892.801	900.811	1186.17	852.145	1146.34	1175.64	892.688	747.126	1564.99	1740.01	985.056	1033.48	1545.25	959.482	857.021	922.976	1643.1	1337.62	1458.98	1088.71	1167.25	866.021		971.45	565.383	1153.23	491.492	1391.59	1029.63
CIAPIN1	3680.15	5884.52	5238.34	5874.1	5175.67	4919.81	5508.91	5473.73	4926.83	3021.69	4004.88	3083.66	3814.33	4143.49	5819.79	3417.73	4883.05	3462.25	5953.19	4428.94	5900.76	4725.19	5434.54	5679.33	4846.82	5365.44	5665.22	5171.79	3539.46	5458.8	5085.2	4356.16	5311.53	4005.28	3719.42	4403.87
CKAP4	1131.8	1779.01	2003.34	1458.34	1383.26	1647.48	1754.48	1514.01	1543.16	1463.8	1726.52	2425.01	1417.71	1085.22	2156.66	2844.94	2203.15	1322.02	1191.21	1974.75	1171.92	1604.13	1453.13	1752.68	2018.24	2070.99	679.188		1964.83	1505.73	2005.09	1816.82	1805.1	1494.7	1692.59	1330.77
CKAP5	1740.74	1753.9	2561.58	1913.97	2383.56	1566.9	1828.33	1799.11	2268.64	1793.54	1964.11	2852.95	1922.96	1921.06	2132.26	1973.28	2066.25	1833.68	2097.1	2169.23	2166.43	2092.52	1847.92	1584.58	1964.75	2002.37	2058.95	1770.59	2490.82	1145.76	2172.25	2028.44	1573.89	2068.04	1681.49	2069.53
CKMT1B	3812.4	2402.84	4151	3372.85	3854.11	3834.4	2579.96	2946.54	3863.36	3357.38	2506.76	3677.21	3462.86	2967.62	3171.67	5595.63	4028.34	4673.17	5117.16	6591.68	3126.16	3310.19	3303.5	4035.66	4200.84	3140.51	2912.23	2378.01	3139.3	4829.7	3202.78	3528.2	2807.8	2238.79	3038.51	2736.81
CLDN3	3002.58	1958.73	1592.98	1264.79	5080.6	1993.05	3195.45	2555.46	3229.28	2339.71	3057.86	1528.87	2826.21	2124.17	2560.65	3051.72	3469.88	2484.7	2748.67	4034.56	2499.98	2563.15	2273.08		1573.56	2603.35	1985.55	1546.52	1797.77	1748.84	3342.05	3156.75	3117.6	3768.72	1654.3	2486.7
CLDN7	587.803	388.279			201.518	91.967	513.621		381.45		621.195		504.28	373.324			131.685	300.09	470.573		367.535	306.937	225.541		267.094	385.276	493.212	786.576	476.492			292.302		410.436		470.919
CLIC1	14988.7	13830.1	12931.6	12489.4	13302	13378.6	14984.3	13427.8	13375.1	9955.39	14055.3	14211.5	12583.7	13689.8	13797.7	12223.5	13241.7	11820.1	10478.6	11092	12858.6	13638.7	12791.9	12429.8	12498.5	14392.5	12158.8	8848.95	15033	11611.9	15366.9	15202.5	14141.4	13061.5	12155.8	13574.9
CLIC4	1346.22	1997	919.768	819.418	1138.08	1355.74	1414.78	1324.02	1196.85		909.503	970.074	1069.28	1239.68	1174.27	498.189	408.025	793.631	897.701	384.495	903.459	1236.21	738.08	500.058	439.688	1104.5	1585.48	1084.41	1122.38		1671.06	1481.7	963.731	1414.54	1092.07	1001.16
CLINT1	1310.09	1668.22	901.593	2193.72	3768.45	2108.47	1532.99	1533.95	1945.06	2289.84	1258.89	2085.31	1837.37	1156.78	1684.96	1226.3	2683	1200.3	1699.43	2075.79	1035.77	1392.25	1362.67	881.943	2057.77	1823.34	1450.91	1450.24	1425.83	2353.09	1283.98	1891.27	1791.21	1402.53		1032.53
CLNS1A	4097.16	1943.67	7339	2237.33	5522.46	2389.5	6308.69	3059.03	4391.88		3448.31	5502.52	5164.89	2728.02	3103.02	3327.19	5082.78	4791.57	4753.97	3932.75	4396.46	2769.35	5268.05	4460.53	3348.81	2448.06	3168.47	1825.38	3565.85	6207.34	4826.59	2712.15	2880.08	3398.1	1495.07	4565.85
CLP1	2195.58	2567.05	1412.53	2495.69	1347.05	3391.21	3082.11	1870.24	2920.31		2120.94	2008.71	2300.55	4215.13	3126.31	1514.3	2727.78	3098.12	2858.98	1685.94	2376.32	2971.77	3051.86	2557.72	2819.03	2571.34	2616.5	2408.67	2763.66	2141.85	3143.69	2460.65	3085.12	1803.06	3403.73	2267.74
CLPB	2785.73		2136.44		2623.04		2352.55	1620.84	1559.48		2021.77	2089.26	3106.15	2048.97	2112.62	1286.86	2021.6	1513.65	2759.33	1293.07	1772.47		1154.27	2097.23	2171.61	2066.93	1548.06		2859.45	1069.84	3109.78	2698.66	2419.36	2392.25		2842.42
CLPP	659.758	1360.26	424.649	1716.72	921.635	1518.58	1202.58	932.975	1350.71		1118.01	1582.23	1133.5	1211.43	1215.82	815.67	1913.06	1679.17	2103.3	2271.35	1331.8	1491.43	1599.46	1853.36	994.086	1679.46	1106.85	676.385	1312.91		1554	1425.5	1112.67	1806.69	1034.82	1370.1
CLPTM1	3595.52	3819.69	2965.15	3377.42	2081.65	2409.6	3244.91	3486.38	3049.78	3315.74	3348.94	2181.14	3515.78	4160.12	3031.02	2664.71	3318.41	3557.42	4981.73	2699.63	4324.6	4889.38	3517.17	2904.78	2970.21	3702.75	3410.65	4475.09	3410.06	3128.23	4337.17	4061.3	3484.45	3727.52	3388.43	3998.88
CLPTM1L	727.051	440.056	766.04	534.666	903.98	401.96	860.795	721.64	1039.65	980.521	587.449	666.668	779.891	692.611	1034.6	948.682	1015.21	696.569	286.545	845.483	643.604	567.352	791.878	826.232	786.296	471.936		443.221	988.538		590.43	759.932	398.991	861.158		718.664
CLPX	4020.89	4128.85	5715.65	4593.36	5345.01	4305.99	4526.6	4424.29	4171.05	3826.65	4118.25	5291.78	4827.59	3520.76	5016.9	5119.22	4035.11	4494.59	5689.59	5590.37	3761.34	3986.34	4553.18	4396.11	5052.74	3401.79	4134.62	3741.34	4867.63	4677.28	3972.47	4654.01	3698.1	3822.97	4292.93	3609.68
CLTC	53436.2	48644.1	40695.7	48294.9	40268.4	42767.5	50336.9	46594.2	46077.6	38516.8	48363.7	39788.2	49195.2	47927.5	43218.6	32600.5	46918.9	49154.8	51224.3	36954.3	50852.9	51517.3	48284.9	46111.1	49343.1	52768.6	46544	50576.6	45464.4	35366	52962.5	47620.8	54668.9	51405.4	44702.9	50494.2
CLUH	7793.79	7438.04	7072.74	7043.02	7450.69	6281.04	7135.36	7568.03	6687.64	5541.77	7279.47	8300.27	7653.07	7997.09	6976.39	8018.51	7246.71	6982.6	7297.94	9073.87	7221.58	7799.57	8019.38	7855.11	7688.38	7490.55	7741.84	7098.52	6803.95	9032.7	7649.81	8253.21	7733.22	6944.37	7464.5	7957.05
CMAS	1093.57	1084.79	970.811	1307.66	1288.35	1439.45	1287.9	1289.19	914.145	1290.05	1538.01	1069.91	1081.2	1741.59	1446.39	1585.64	1337.38	1175.04	1316.87		1183.04	1147.35	1581.43	1013.84	1255.53	1249.97	1167.4	999.922	1491.03	747.681	1220.24	1191.68	1305.8	1234.38	1177.04	1129.78
CMBL	528.99	962.414	100.148	1629.14	1231.44	990.191	1001.29	720.774	704.951		1003.75		867.575	767.171	262.427		858.442	1507.85	957.541		807.957	1475.84	839.454	458.207		755.099	1113.69	906.215			583.211	1207.15	910.214	578.562	1356.33	917.877
CMPK1	630.429	654.921	1086.29	880.529	895.827		844.156	390.725	416.51	349.538	1000.3	928.858	369.069	565.277	407.932	859.305	311.748	437.557	642.471	824.93	943.427	950.322	710.677	968.136	346.239	579.977		270.396	785.908		562.692	624.856	791.592	597.958	447.187	1103.71
CMTR1	7135.8	6979.54	6944.42	6044.09	5513.98	8278.98	5385.27	6192.21	6329.06	6030	6245.59	6406.14	7757.82	6909.95	7300.95	6483.97	5937.94	7507.05	6258.46	6507.91	6351.45	6025.4	6029.19	6436.08	8921.61	7544.03	6879.16	5983.61	7285.43	6423.1	5121.79	5980.02	6020.35	6095.77	7158.08	6413.05
CNDP2	9872.79	8783.83	10568.6	11358.6	11104.5	7872.17	9311.52	8898.68	8639.45	9139.1	8037.89	9844.58	9728.02	9616.79	8432.31	9112.24	9304.29	8196.67	9188.68	8941.87	9472.72	8489.65	9557.52	11826.4	9420	10308.5	9710.43	9557.72	9507.64	8702.85	9610.39	9698.87	8928.61	8881.3	8001.03	7673.23
CNN2	1462.7	1343.38	1616.77	1587.22	944.938	1564.2	1226.44	1043.77	1214.59	834.789	1048.52	1394.45	801.58	987.124	1812.19	1556.96	1162.67	835.616	680.549		1034.78	897.622	787.676	772.839		956.778	1022.72		1078.91	1377.67	1096.73	1433.15	1586.95	1327.8	1237.05	865.545
CNNM3	1357.63	1065.72	1504.63	1343.54	2343.22	1145.06	1175.26	936.52	1079.83	1218.35	1837.05	1801.89	1549.47	2087.37	1415.54	1521.03	1302.25	1278.36	1929.55	1256.73	1414.23	1469.69	1599.55	1144.94	1337.22	1050.16	1172.02	1434.28	1457.83	1269.45	924.393	1028.22	986.992	1125.31	1570.34	1139.43
CNNM4	1873.92	1456.85	1337.84	2278.92	1871.18	1151.11	1943.25	1248.83	1558	2090.37	1674.48	2214.93	1598.79	1547.25	1437.38		1269.45	2429.92	1189.49	2006.63	1303.24	1946.89	1613.13	2226.93	2248.39	1947.72	2177.9	1625.12	1596.36	1375.6	1670.14	2235.67		1536.45	1272.84	1537.87
CNOT1	3439.01	3162.34	2274.78	2819.84	2588.41	3235.88	3084.07	3236.73	3424.73	2641.69	2983.36	2563.9	3144.86	3001.66	3374.79	2953.15	3470.6	3535.04	3731.76	3806.95	3064.98	3228.07	3243.82	3468.68	2946.75	3286.16	3629.56	2868.98	3416.66	2312.5	3484.45	3384.03	3339.16	3363.75	3287.45	2995.64
CNOT10	833.363	665.389		697.984	300.944	415.186	764.808	754.275	1013.81		1107.68	293.281	635.301	359.579	872.718	417.241	494.339	425.933	390.835	518.397	812.648	556.888	911.272		653.963	937.509	646.953	862.483	679.706		713.366	484.147	574.772	763.265	937.209	1014.68
CNOT2	790.52	964.144	1952.23		1592.41	1022.65	792.646	992.882	1007.12		1119.19	1202.86	631.128	379.672		572.561	765.769	427.914	498.785	1287.55	871.959	956.219	816.18	858.269	815.401	1030.42	624.857	416.52	714.087	425.666		570.626	693.778	442.561		610.084
CNOT3	277.025						159.816												366.208		357.047	186.441	688.457	596.169		234.322		556.868
CNOT7	1060.6	1218.31	1058.92	1097.5	1374.23	1804.15	1251.55	1769.35	1154.93	2470.82	1232.77	912.318	1381.17	1183.88	931.749	845.765	605.164	1094.16	821.073	1251.27	1418.59	1074.48	1357.55	1146.36	890.756	1247.77	811.983	1425.65	1205.35		1221.82	1274.86	1444.46	1381.29	1229.01	633.863
CNP	1439.53	1814.66	1278.74	2048.57	1507.79	1925.72	1131.25	2609.48	1942.11	1072.13	1783.55	2428.27	2159.78	2222.49	2672.63	2049.37	3076.99	2163.22	1881.88	3158.54	2454.96	1618.83	1287.63	1998.49	2183.5	2319.94	1602.52	2060.52	1583.17	4716.86	1729.28	2527.54	1956.68	1925.09	1070.07	2339.18
COASY	920.098	631.493	1260.73	590.834	972.718	984.477	732.731	772.424	703.28		636.506	978.881	525.818	702.534	725.287		703.234	584.113	1020.55	1067.74	659.446	692.591	720.875	943.847	649.608	592.945	700.487	801.985	911.687	1292.34	1025.26	813.927	881.727	672.285	333.006	637.124
COG1	702.396	698.756		325.78		868.008	519.996	671.86			587.96	269.733		524.433	1152.39		1488.57	1043.15	838.332		668.2	470.883	361.653					422.025			1518.58	745.106	634.362	1013.94	827.388	501.423
COG2	413.872		546.082				299.983				575.16										654.679	369.814	561.868
COG4	476.298	416.562	326.898				525.378	333.21	730.096		765.692		964.913	638.026			556.652	533.004			580.133	526.484				324.537	255.113	650.995			729.82			713.626	368.02
COLGALT1	9179.47	9104.08	10802.1	11891.6	11200.9	10343.2	9771.2	9465.62	9508.49	8163.51	10034.2	9736.84	7842.21	9822.86	8262.61	9195.7	10016.3	8234.33	9287.35	8691.83	9500.35	9165.54	10508.9	11313.9	10204.2	9300.65	9850.01	8602.17	9005.11	9486.57	8126.67	10335.1	9075.7	9811.33	9696.2	8869.06
COMT	6084.93	4422.08	12579.9	4634.45	7651.56	770.861	6283.53	2756.15	5604.97	5122.93	4857.08	5306.7	3644.95	3282.23	2553.69	2166.63	1686.02	2824.35	4027.98	1614.74	5850.25	6209.03	8115.28	8902.58	3690.85	5035.35	2411.83	5514.21	5227.5	9507.81	5301.73	1879.37	6248.72	5220.15	2853.27	5726.87
COPA	13728.2	12879.6	9251.38	11423.4	9395.15	13540.7	13442.7	12306.6	14225.5	12673.9	12608.1	9006.2	11870.9	12770.6	11561.7	10047.2	13438.8	13969.8	12328.6	9949.45	12080.9	10911.4	12476.5	9006.27	11417.4	11991.6	12047.5	11506.9	12204.5	6843.85	12733.4	12654.7	11446	14067.9	12543.3	12363.3
COPB1	15765	14038	14694.7	12540.5	14034.6	12847.7	16015.9	13059.6	13834.9	13335.1	15384	11994.5	13312	11848.3	15911.1	11132.4	12185.9	13218	15019.8	11231.4	14998.5	16296.9	16448.4	15554.7	11371.2	14942.3	12977.4	14058.3	15937.8	11657.2	14521.5	14318.2	13992.8	17104.1	11740	16230.8
COPB2	19523.6	16773.9	9902.16	14853.4	9397.02	18341	18686.1	17311.2	17329.7	19474.6	18651.3	12112.7	16100.6	18006	14864.4	10888.6	16255	18674.1	15391.9	10389.2	15221.5	17005.3	12423.8	11185.5	12220.7	17908.1	16909.3	17558.7	14904.2	6926.51	17618.3	14856.5	14888.6	19389.1	15149.9	16885.6
COPG1	6293.62	6334.38	7189.96	6530.36	6580.81	5832.16	6066.28	5610.84	5391.88	5874.61	6096.64	6054.05	6411.53	6001.02	6407.76	6412.2	5553.01	5701.82	6145.12	5372.58	5770.97	6088.89	5954.69	6500.98	5551.89	6344.24	5855.7	6290.43	5600.83	7951.98	5902.35	5652.92	6359.75	5601.25	6279.12	5160.55
COPG2	4407.04	4027.22	3035.68	3131.05	1706.4	3379.91	4154.85	4121.72	4007.98	3903.53	3579.67	2081.08	4208.04	3158.26	3434.31	2647.09	3976.14	5170.95	4301.38	2819.45	4113.32	3987.31	4375.72	2485.09	3439.43	4275.3	3540.81	3936.19	3121.9	2871.94	3841.94	4009.88	4251.28	3780.32	3653.54	4201.22
COPS2	2973.25	3130.3	1568.03	2095.47	1781.99	2870.34	2942.98	3138.91	2430.63	2567.51	2494.94	2024.8	3058.73	3782.28	2819.86	2515.99	3346.26	3235.67	3844.07	1527	3212.94	3438.88	3084.07	3240.68	2598.69	2732.47	2842.2	3319.26	2635.66	2693.5	3190.47	3336.77	4582.83	2790.89	2751.16	3036.92
COPS3	1157.61	1090.48				654.399	1764.87	1230.24	1735.85		1326.47	1183.51	1789.45		614.604	1813.37	1942.95	1569.3	1504.43	901.028	1820.62	1926.62	1423.33	1635.42	1690.27	1526.81			1424.44		1600.02	1439.29	954.945	1195.15
COPS4	1056.98	1062.78	892.68		350.558	736.946	1228.39	1189.81	1171.31		855.251	445.357	677.936	566.383	1010.97		856.404	856.143	1048.13	832.958	990.682	704.676	648.463		422.661	822.48	869.868		651.525	469.232	1497.97	1048.21	885.753	625.212	308.904	1021.58
COPS5	529.81	655.894	1027.16	891.613	1654.94	908.995	764.585	803.459	583.158	397.637	722.589	630.95	803.675	605.122	434.046		641.984	622.709	559.284	520.607	747.121	804.817	707.05	422.292	508.105	1147.82	661.595	979.821	941.743	972.501	839.087	758.938	914.017	926.548	646.861	621.838
COPS6	1790.67	1247.89	1248.86	1040.98	1264.86	1431.04	1716.61	1351.48	1805.63	924.525	1403.19	1586.77	1820.04	1645.38	1427.72		1460.55	1656.24	1848.11	1001.89	2134.89	1808.93	2014.8	1053.03	1447.02	1940.78	1591.03	1428.96	1654.04		1735.76	1605.88	2327.61	1477.21	1307.27	1476.42
COPS7A	858.59	686.602	1129.91	951.427	1124.62	625.929	394.625	523.518	693.099		527.297		633.786	684.83	562.169	132.687	874.979	674.932	777.5		1338.76	701.74			1050.96				1124.61		1074.04	434.959	943.324	615.371	1132.33	758.909
COPZ1	2407.57	2375.64	2858.29	1856.84	2773.68	2002.21	3469.64	2234.77	2835.5	2433.21	2041.56	2062.39	2228.53	1870.79	1644.56	1710.59	1981.6	2739.92	2912.96	1526.98	2754.53	2741.4	2435	2081.58	2222.85	1968.41	2518.62	2207.58	1727.19		2760.49	3358.47	2014.71	2194	3258.34	2588.24
COQ6	647.297	179.678	449.47	665.251	348.356		545.969		584.734		589.675	227.052	545.033	335.508				205.883	680.887		392.442	458.725	93.044	468.733	822.379	795.901	614.599	371.629	1184.96		681.534		533.989	662.043		672.01
CORO1A					1144.84		770.384	421.857	807.206				622.488	131.424	505.412	666.169	309.507	589.768	312.34		527.806	583.985	322.298		563.752			523.126	1099.1			600.122	650.523	710.494		493.597
CORO1B	24741.7	25397.4	28243.9	31072.9	25563.2	24121.5	23105	25650.2	22417.3	27056.8	21919.8	28715.1	26442.8	25173.3	24985.6	29673.5	26908.3	28448.4	25480.4	30576.5	27107.8	24936.5	29263.4	30433.3	26670.8	25676.9	25711.4	27268.1	23306.9	26716.3	21293	22942	19862.7	20926.9	31344	24314
CORO1C	6213.27	5293.1	6008.54	5808.57	5616.4	5601.6	5646.28	5374.52	5239.09	5756.6	5232.32	4770.21	5166.45	6192.01	5136.78	5347.43	6274.37	5790.35	6547.19	7061.03	6423.57	5580.42	6223.91	5582.32	4791.64	6814.95	4896.59	5552.1	5083.96	8036.72	5994.14	4765.07	5398.44	5469.63	5630.2	7336.73
CORO7	1254.97		1439.63	597.715	1333.16	1011.83	1396.64	1250.21	621.249		863.979	1372.86	1051.77	1150.78		1192.38	1052.31	697.887	1035.39	1196.71	1504.37	1006.72	1653.49	1337.09	1241.45	691.584	1180.53		782.895			1131.93	1347.03	1497.65	1119.24
COTL1	248.94		252.899	303.069	205.762	179.571	358.72	541.923	245.973					379	454.279		633.089	623.039	392.803	516.062	375.516	506.006	433.661	281.545	167.118	907.266		522.386	349.322			357.179	385.355	261.418		256.758
COX5B	2226.92	1701.1	3127.63	2770.04	3421.1	2378.96	1616.43	1960.63	2436.98	2130.45	1535.63	3216.36	2295.66	1790.4	3094.35	3083.84	1875.89	1434.94	1474.83	2426.78	1692.2	1587.72	2203.92	1590.22	1480.39		1566.33	1533.52	2527.78	2413.47	818.12	973.324	631.328	3129.21	1817.3	2700.57
COX7A2	4554.81	6472.42	5221.4	5806.7	4166.31	5785.93	4375.87	5900.99	6021.85	6962.05	6585.89	6098.28	5506.01	6929.59	5575.6	5691.62	6108.17	3893.04	5721.82	5119.8	5420.66	5036	4811.1	4293.19	4035.1	6178.25	4381.22	4940.23	6013.33	3552.65	5364.35	5687.84	5918.73	5366.45	4417.04	7559.06
CPNE1	3335.06	4351.21	2916.93	3271.31	2838.23	4393.11	3496.2	3874.57	3286.7	2857.09	3002.26	3869.9	4749.75	4935.88	3789.87	3475.52	3647.16	4011.05	4361.65	3460.86	4818.03	4738.08	4379.45	3680.2	5201.47	3658.1	4235.48	4346.08	3977.41	4980.67	4160.88	4740.35	4557.77	3596.8	4204.05	3996.11
CPNE3	27767.8	33452	23452.1	34810.9	21565	26353.6	30470.8	31757.5	26994.2	27773.4	25279.8	18808.5	30830.7	35123.4	27512.4	21693.9	32087.5	36707.1	36318.3	25092.2	35944.9	36425.5	36104.1	33036.1	32363	34298.6	33194.3	38449.9	33225.3	19091	31053.8	30002.9	31375.2	28597.4	34984	36704.9
CPOX	781.811	925.294	518.822	810.017	857.327	1675.41	642.507	1126.24	1362.51	1016.47	945.991	783.519	1406.58	1375.93	1058.21	734.335	1180.52	1105.06	1072.99	1908.12	998.015	1208.57	1008.01	839.806	727.936	1194.83	1056.97	1230.39	462.737		759.812	1459.29	1276.58	767.42	1475.37	562.133
CPSF1	1147.6	1343.59	1327.76	919.066	2330.8	1280.1	1396.77	1054.03	1670.88	2279.73	1636.3	2244.94	1377.18	1696.51	1288.78	1281.96	1325.88	1378.03	1340	1016.05	1326.46	1499.95	1615.44	1668.33	1038.37	1071.39	1389.71	1366.78	1160.6		1408.32	1377.57	1540.45	1207.48	1363.27	1278.53
CPSF2	951.321	1055.98	622.32	1907.77	1321.67	1437.69	1211.22	1318.88	712.935	2268.42	1164.59	1533.95	992.561	826.916	1566.65	1228.89	957.411	1623.87	715.44	1453.82	768.061		1146.12	1119.95	1315.32	456.077	1726.22	866.55	1829.01	1423.75	1001.59	1639.52		1346.82	1210.18
CPSF3	1539.29	1200.94	1338.25	1097.17		1562.72	1342.38	1563.52	1245.31		1112.45	842.308	953.102	1117.28	892.507		1474.03	1462.63	2106.45	1205.73	1424.7	2075.91	1658.59	1577.89	2054.01	1454.3	1609.98	1921.7	1420.22		1185.09	1155.93	1502.3	1645.8	1060.65	1617.34
CPSF6	2612.68	3715.5	3217.64	3746.66	2792.55	3155.5	3206.84	3224.96	3209.85	2329.48	2704.82	3335.21	3250.46	2735.08	3782.07	3488.16	2851.77	2329.21	2739.44	2446.9	1631.78	1865.38	3270.41	3959.32	4004.96	2834.64	2278.84	2138.16	3705.35	3379.97	2883.68	2739.44	2737.01	2672.99	3397.26	2417.93
CPSF7	3975.58	4608.56	4818.79	3228.98	4162.24	4644.12	3217.42	4610.11	3142.76	4800.55	4950.04	3875.89	3805.15	4289.1	3076.63	3726.96	4409.2	3508.56	2713.02	4493.75	3813.64	3323.45	3853.43	3683.92	3915.13	4418.34	3983.38	4029.89	4253.47	5855.58	3759.72	3215.63	3518.43	5078.76	3020.57	3061.66
CPT1A	9022.2	8302.2	4383.46	6682.49	6323.44	8326.33	8791.8	8461.23	9219.82	11000.1	9412.61	3985.11	8678.63	8372.82	8067.4	7062.95	8568.56	8285.36	7908.13	6206.71	7875.45	8718.37	7177.17	5726.55	6756.79	9756.12	8327.25	8747.11	8362.51	10011.1	9188.07	7906.15	7879.84	9708.24	8121.41	9286.14
CPT2	2086.59	2285.13	1643.3	2260.55	1747.62	2038.03	2043.72	2219.47	2256.48	2703.2	1985.54	1286.53	2223	2429.64	2639.44	1566.78	2033.65	2741.1	2208.14	1346.83	2294.62	2302.42	2167.85	2000.04	2106.21	2323.08	2129.99	2287.82	2542.15	1415.1	2276.7	2134.24	1850.78	2122.97	2180.99	1928.98
CRBN	2198.41	1564.95			746.863	838.23	1797.79	1678.04	1195.44		2149.42		1984.01	1836.56	1291.11		1729.09	1621.89	1040.93	661.149	1177.37	961.688	771.817	650.829	776.46	2575.17	1555.24				1541.94	1273.31	1078.32	2633.26	2178.72	2116.02
CRLF3	226.895						267.833		215.398		582.335		349.34	563.086	635.446		377.136		164.458		571.501		625.273	501.664			458.512				594.361	332.665		418.401	615.889	294.427
CRNKL1	2655.75	2319.97	2610.05	2437.98	1817	1928.02	2967.1	1951.87	2149.38	2583.53	2193.46	1890.67	2183.6	1948.66	2566.39	1345.33	1606.94	2354.92	3162.13	2658.04	2392.28	2410.83	2676	2809.38	2764.9	2806.62	2541.9	2479.32	2258.2	2293.99	2352.36	2192.27	2081.59	2037.22	1986.99	2719.36
CRYL1	905.131	1128.69	942.813	1442.34	1009.78	1396.54	1126.05	1320.55	973.374	2030.04	1037.86		937.364	764.8	1447.34		949.621	1074.39	1114.85		988.85	676.082	800.093			1244.91	991.235	1473.84	1462	990.494	1225.18	973.645	428.991	1162.28	1668.48	481.577
CRYZ	8254.2	8080.12	5900.58	7564.74	5058.86	9929.13	8038.79	8862.95	9299.72	8709.29	8150.01	7546	8234.17	8437.66	7809.08	6467.43	5125.09	7830.97	7331.47	6742.37	7329.66	8976.11	8414.95	7439.5	7493.05	7179.89	7821.66	7760.7	7150.95	3869.25	7838	7454.81	6841.63	7849.01	9160.27	6761.77
CS	56904.8	52249.8	61847.1	52673.2	70108.7	57072.1	60513.5	56116	59994.3	39773.7	55760.5	57821.1	58415.7	49890	59449.1	53396.4	58206.8	52045.3	53737.2	50872.1	50828.8	50191.1	51056.8	57610.3	56698.9	58569.3	53128.2	47085.1	58019.9	55507.2	59474.2	56447.7	55986.9	53341	47857.4	52733
CSDE1	13524.5	10256.7	10581.8	13472.6	10384	11559.8	13154.6	12821.7	14208.8	12202.1	14692.4	12988	13922.5	16018.3	14582.9	13583.6	14187.3	14440.2	13321.8	14875.7	14006.9	11256.7	13982.4	10108.7	13183.5	12622.1	13275.7	9574.88	12947.6	8089.1	11720.5	13306.4	14369.8	13481.1	12102.5	14936.7
CSE1L	13557.5	12398.9	15162.4	8602.52	14950.8	10911.5	14683.9	14296.9	16487.2	10826.1	15526.4	14584.5	15875.6	11173.5	16485.1	13357	18579.4	14441.6	19584.9	17801.2	13150.4	12598.2	14160.3	9694.55	12517.2	12304.4	12312.2	8466.2	16773.6	9751.87	15192.9	15262.1	12165.7	13777.9	9369.95	13956.6
CSK	4123.93	4220.97	5918.4	3633.87	4547.42	3870.35	5305.37	4235.33	4514.72	2603.54	4092.76	5015.09	4293.16	4069.43	4699.75	3686.51	2942.63	4054.05	4897.65	3812.06	4382.61	4793.69	4430.3	4713.56	3779.95	3980.28	4965.25	4682.82	3977.22	4455.62	4139.94	4301.6	4619.21	4398.33	4057.15	4345.45
CSNK1A1	6558.91	6545.08	2508.61	4655.93	2397.09	6534.3	6724.89	6486.83	6243.79	4237.17	6163.95	2394.73	6125.91	5280.17	3843.52	2359.98	5130.11	5988.84	6860.61	2260.87	7119.93	7421.4	6003.18	3410.39	3522.73	5834.17	4725.85	7443.79	3596.61	2054.36	5950.32	4367.5	6322.25	6634.44	6142.8	6866.74
CSNK2A1	514.916	1126.87	630.786	749.757			548.402		203.248					73.3533	348.334				493.64		693.766	468.79	1195.37	883.143		734.537		500.442			573.943	655.176	1345.31	670.881		575.005
CSNK2A2	2872.49	2551.84	3314.02	2576.48	2239.35	2814.36	2818.35	3084.59	2563.14	2239.41	2619.68	2806.31		3175.49	3156.8	2937.5	2904.95	3062.58	2410.82	1974.8	2723.98	1855.99	2959.86	2220.64	3367.16	2769.16		2898.4	2694.41	2216.76	2662.61	2663.17	2513.93	2211.96	2141.91	1799.79
CSNK2B	743.63	960.65	1388.44	1739.12	1007.77	1664.3	920.74	1373.2	1230.2	1686.92	1637.38	774.646	828.903			1113.2	983.433	979.288	853.691		1169	1553.52	603.366	1318.45	871.827	1274.65	1102.75	1810.38	746.735		928.825	858.114	686.025	734.401	1830.55	741.324
CSRP1	7946.39	11628	7057.02	9227.07	7438.61	7561.48	6978.45	6038.89	7460.12	5842.63	10092.8	6346.41	11006.7	10897.9	8305.87	7281.57	6204.94	9829.75	8631.26	5024.99	10510.1	9190.68	9041.96	11815.8	8840.44	9033.45	9270.36	10018.2	7347.04	8097.25	5130.88	7915.14	6734.61	6739.08	9852.39	9804.5
CSTF1	2267.61	3219.47	2681.49	5028.26	2521.61	4050.73	2685.26	2983.81	3474.52	3772.43	3716.54	3812.67	3550.8	4161.24	3727.16	4185.32	3717.98	3921.81	3616.62	4913.76	3881.28	3655.71	3988.55	3906.08	3603.59	4148.14	4477.39	3326.51	4805.08	3310.47	3063.61	3615.62	2899.88	2634.41	3182.8	2912.79
CSTF3	841.454	702.586	625.472	964.535		1506.89	738.384	1103.94	1007.39		1032.89	746.046	1066.56	1567.08	1108.4		1561.93	1036.4	1208.55	518.314	838.425	990.428	807.177	658.334	1091.03	1529.16	709.523	1022.91	1222.69		1188.04	1003.41		862.799	1080.72	976.992
CTBP1	3954.72	4082.44	3164.92	3678.78	3222.18	4041.18	3650.97	3970.71	4428.23	3710.76	3402.56	3103.22	3597.75	3672.27	3426.71	3240.02	4010.21	3811.07	3458.34	2817.23	4502.23	3299.42	3353.62	3091.05	3119.51	3653.25	3858.79	5074.57	3818.32	4166.48	3397.04	4596.16	4988.35	3535.07	3992.78	2848.9
CTBP2	5465.7	5598.83	2485.09	6130.02	2327.93	6391.88	5046.5	5552.82	5703.29	5545.79	5091.28	3645.55	5670.94	6166.01	5348.39	3322.95	5765.68	7394.33	5857.76	3947.24	5554.65	5888.17	4788.26	4058.14	4632.36	5148.43	6865.69	6089.98	4699.91	4513.26	5186.57	5103.37	5918.18	5596.88	6012.73	6005.8
CTBS	2263.99	5004.46	4914.62			1864.96	2761.74	1653.47	2100.42		2791.37	2828.48	5430.95		2383.19			3739.17	3535.34	3577.34	2703.46	2214.04	4496.98		4466.92	2928.4	5260.78	5914.07			3984.61	2810.87		2338.43		4286.17
CTDP1	1174.66	1510.93	3119.05	1313.16	2306.53	1230.03	1360.25	624.657	1454.1	1111.93	1048.2	983.574	1029.98	1225.52	1041.16	721.305	732.56	981.674	977.401	760.074	1725.88	1422.35	1865.49	1584.07	1188.85	1383.87	985.599	1281.86	1737.56	1296.1	605.548	880.391	1317.62	1067	989.027	1247.09
CTNNA1	2809.93	3869.46	4576.03	2353	4022.11	3016.07	3391.66	3552.21	2308.76	3095.61	4107.97	3961.98	3844.46	3435.63	4257.64	3241.4	2825.45	3633.57	2122.86	3203.52	1977.17	2960.25	3362.31	2258.7	2618.41	2207.76	2662.23	2277.16	2740.84	3214.85	3392.74	3544.37	2803.75	3000.34	2533.47	2606.38
CTNNB1	5784.48	5563.23	4581	4294.32	5162.8	5270.14	5397.44	5467.09	5368.37	3876.38	4752.38	4935.28	5279.17	5197.94	4683.08	5286.5	4945.34	5399.76	5114.52	4643.56	6360.67	6071.34	6122.66	5538.82	6173.23	5415.59	5976.25	5421.17	4605.13	8363.81	5340.3	5813.6	5636.04	4864.03	4845.7	4178.66
CTNND1	3069.94	3975.87	3509.81	2493.82	3912.8	3703.81	2443.1	2705.32	3433.81	2630.52	2585.98	3428.69	3473.06	3282.88	3418.92	4001.18	3507.66	3577.94	4118.17	4173.92	3202.11	3588.15	2784.5	3759.86	3057.34	2802.24	2880.98	3120.72	4014.83	2695.37	2546.44	3396.38	2751.79	2164	2838.84	3210.11
CTPS1	6793.06	6591.9	5337.13	5635.38	6078.82	7408.6	7485.9	6592.59	6761.88	5262.51	6922.52	4449.37	6586.4	6799.24	6881.68	4437.14	6436.58	6753.86	6751.06	6799.62	6505.47	6655.36	6706.13	5344.79	5797.42	7361.34	5599.91	6497.12	6269.56	6410.49	6716.95	6022.75	6390.95	6510.22	6358.16	5443.65
CTPS2	4599.29	4441.11	2912.55	5352.1	2723.82	4269.66	4457.89	4381.66	4399.53	3085.55	4255.39	2703.51	4974.75	4096.25	3667.99	2526.84	3910.96	3479.21	5519.43	2728.01	4825.78	5381.98	4655.03	3398.25	3710.92	4670.5	4053.64	5225.81	4715.71	3592.18	4744.74	4055.33	5048.32	4143.38	4462.63	5035.25
CTSA	2066.01	1916.58	1470.36	2335.03	1628.86	3164.78	1957.01	3011.66	2325.5	2622.81	2642.57	1669.08	1784.95	1366.78	1714.75		2238.5	2210.73	1684.19	1155.95	2284.62	2101.66	2023.67	1842.85	1198.42	2731.26	1388.19	2150.84	1937.6		2214.94	2558.84	1759.51	2278.93	2042.86	1624.55
CTSB	2442.93	3293.89	865.153	1877.43	1163.71	1736.64	2215.15	1863.92	1353.66		1551.34	2162.88	2168.58	2201.32	1549.84	1175.29	2636.33	2279.84	1733.65	1008.65	2815.71	2988.99	2282.18	2750.37	2053.62	2923.97	1900.13	3606.86	1941.99		2376.57	2441.85	2187.59	2827.54	2392.77	2008.8
CTSD	53884.2	42489	47441.4	58612.8	46564.2	46604.3	47167.2	43927.1	51571.2	46710	53048.5	49517.2	48554.8	46651.9	53773.8	41907.4	41081	46108.4	39727.2	41182.5	45476.9	47067.4	49106.2	53187.1	54059.2	57439.6	46518	52228.8	52706	51319.2	42869.5	36038	53076.3	51050	53228.7	47098.8
CTTN	5347.44	4205.27	4495.17	4761.49	5656.16	5065.43	5705.1	5511.86	5395.02	4526.06	5663.26	5000.9	4869.6	4686.73	5022.35	3861.96	5188.98	4397.74	5252.97	4703.1	5294.81	5630.09	5232.28	4889.15	5057.72	5179.92	5216.68	3132.28	5270.92	3719.78	5447.41	6217.53	6259.63	5539.43	5765.47	5019.42
CTTNBP2			846.325	1721.07	1237.97																															1655.63
CTU2	1203.56	1411.77	1953.38	1069.37	2499.3	1278.78	945.684	805.532	1682.78	1373.8	1200.19	1607.67	1105.31	1363.2	1107.81	1529.49	1285.68	1231.08	1848.3	1172.67	1325.37	1501.2	1011.81	1319.62	1504.06	1515.6	937.128	1111.63	1504.2		835.902	1185.53	878.115	1593.02	1408.68	1151.88
CUL1	4453.16	3931.76	2679.55	3400.63	3792.57	4207.34	4289.18	4208.68	4793.02	3916.49	4377.7	3863.06	4172.32	3819.56	3974.85	3253.98	4369.67	3579.31	4028.37	3329.66	4248.28	4177.5	4470.6	3280.03	3792.19	4037.23	4063.74	3544.62	4475.6	3766.67	4056	3630.49	3585.76	4446.12	3680.57	4321.14
CUL2	3773.09	4241.59	2131.37	3355.5	1583.97	3413.97	3795.68	3698.72	3342.32	3778.29	3901.8	1953.92	3948.94	3680.53	3625.46	1979.51	4484.61	4398.95	4453.74	2531.99	3823.76	3813.79	3488.08	2552.42	3362.65	4257.02	4050.1	4000.75	3407.33	1538.07	3736.61	3621.48	4086.15	4110.23	4396.07	4313.07
CUL3	4555.85	5751.86	4796.13	4556.86	4336.6	5248.88	4917.34	4730.37	5018.66	5155.35	5272.42	2701.01	4902.78	5354.82	5462.44	4565.37	5230.84	5817.39	5854.66	5379.81	5275.98	5788.33	4520.84	3084.1	4791.11	5098.14	5277.89	5082.66	4906.02	3339.48	5558.04	5727.58	4591.23	5479.68	5979.81	6159.15
CUL4A	2018.93	1996.48	1995.05	2159.56	1880.79	2020.66	2298.64	2017.97	2180.69	2568.37	2432.27	1449.48	2434.48	2329	2644.76	1781.28	2435.09	1573.6	2373.61	2255.54	2272.63	2338.32	2642.51	2659.54	2782.75	2358.72	2105.86	2312.6	2232.9	2564.87	2185.92	2488.04	2096.8	2025.44	2308.07	1994.27
CUL4B	436.347	849.45		1061.31	123.798	707.81	664.443	605.982	636.766	554.311	644.911	357.394	576.058	599.642	541.883	411.082	325.976	725.04	419.997	292.563	467.08	826.419	560.28	672.026	587.474	973.609	704.156	369.523	465.087		550.744	321.758	742.059	676.992	363.863	534.528
CUL5	3282.07	2371.15	3173.02	1898.16	1781.58	3201.18	2827.51	3470.96	2905.07	1775.35	2530.94	2718.13	2979.46	3350.76	2647.31	4585.74	3138.89	2590.01	1699.25	2481.61	2937.31	2657.82	2848.89	2273.5	2389.92	2991.84	2616.29	2285.39	3594.8		3868.19	4069.74	3127	2844.59	2453.27	2693.14
CUTA	410.32	251.324			1007.66	956.626		1129.38	535.859	1631.22	1028.63			737.09	657.857		539.839	563.417	652.475	628.328		589.559			804.216	731.755	1221.79							852.571	1020.44	737.607
CUTC	2701.2	3185.37	2512.19	1538.21	1703.45	2492.38	1961.73	1966.37	2725.38	1758.47	2344.73	1994.79	2141.28	2479.17	2330.54	1968.67	2734.48	2205	1735.18	1840.77	2381.74	2292.83	2355.08		2284.05	2272.85	1797.21	1622.24		1927.78	1612.88	2446.78	1886.16	2053.49	2170.32	2480.4
CWF19L1	2858.57	2514.62	1724.44	2706.98	1735.71	2369.8	2504.48	2151.72	1531.63	2305.2	2712.46	2956.61	2688.41	2812.32	1595.94		2876.33	2729.35	1844.4		2719.85	2244.43	2526.92	2042.91	2025.93	2083.42	2345.78	2198.42	2201.19		2206.58	2288.49	1614.63	1987.56	2539.51	2232.91
CWF19L2		1576.51					787.652		491.393		417.773									1117.37			1073.6			543.299			763.405						751.733
CYB5R1	5915.61	4893.13	8287.67	5633.88	4709.07	5572.87	5561.75	5437.23	5576.89	6311.91	5901.71	3772.32	4187.86	4985.07	6443.91	3716.47	5419.87	5494.51	5963.03	6411.4	3734.61	4803.16	4493.58	3750.06	4164.68	5381.1	5029.85	4896.57	5372.39	4825.5	4419.72	5310.36	5247.23	4807.44	6726.78	4439.16
CYB5R3	220547	160608	264540	197257	184062	142856	241207	135198	184012	357869	162140	194596	182691	188277	150924	137617	109641	154464	213429	201267	227040	199749	231408	220920	180908	208519	167046	232904	189414	224276	229614	148084	166227	160782	154020	226104
CYC1	2175.43	693.796	3054.48	1748.83	4656.83		2185.58	939.907	3655.39		3522.1		1159.65	1104.78	2386.54		1628.65	630.131	1493.39		2933.29	1202.13	2899.26	3598.08	1536.6	4162.09	692.408	2081.37	3481.77		2108.56	1677.19	2466.35	1972.73	1778.31	2291.58
CYCS	3416.73	2145.75	1422.16	3709.85	1936.76	2522.27	2104.44	1673.48	744.425	835.833	1060.45	3232.52	2677.88	1920.26	1487.77	1731.67	3095.84	1623.87	3802.26	3560.9	3992.37	2114.62	2668.97	2903.75	2954.94	1475.7	2792.27	1815.37	946.018		2518.51	1503.86	1062.34	2100.29	2460.08	1976.21
CYFIP1	7875.96	9830.53	6252.29	6679.37	6954.46	8651.31	8483.22	9695.88	7787.78	6917.94	8602.12	7976.72	7985.53	8017.87	8347.64	10877.1	8205.72	9260.28	7845.16	7457.52	7882.6	7825.03	8557.15	8547.53	8653.04	8729.81	9689.65	8112.14	8277.12	9157.66	8900.64	9425.7	8926.74	8375.14	7213.37	7076.77
CYLD	3577.99	4064.25	3747.23	3777.95	2953.3	3126.65	2870.4	3460.47	3241.84	3754	4527.58	5352.11	4654.27	5707.7	4999.32	6266.33	3943.12	4079.94	2065.19	2268.32	4458.09	3483.45	4496.59	3403.83	4680.78	4638.8	5514.88	3529.55	4747.63	2873.99				3500.9	4715.52	4815.02
CYP51A1	8661.11	6033.85	3380.53	4286.48	7323.39	7108.52	5900.47	7623.72	7339.41	7864.94	5027.11	7100.02	8048.54	5736.17	8292.08	5973.43	7188.07	5073.43	5975.91	8591.42	5172.84	6804.05	4267.99	5472.3	5290.26	7449.84	5911.65	7324.61	6357.2	3754.52	7452.93	6689.48	6233.02	6161.95	7744.54	4976.4
CYRIB	607.358	443.975				478.358	551.209	453.182	656.977		644.547		626.348		305.983		837.113	527.685	826.73	582.654	643.844	640.904	456.615		321.856	754.197	503.215		564.954		611.922	828.306	869.623	840.124		647.62
D2HGDH	1546.74	954.708	867.106	2322.4	1626.96	1977.93	1103.16	1342.87	1357.66		1789.59	1935	1820.63	1692.5	1781.52		2077.38	3126.58	1514.15	2571.3	1612.34	1453.62	1397.87	1114.66	1717.15	1620.15	1790.08	1174.34	1200.29		1830.14	1331.79	978.266	1479.75	2420.51	1466.65
DAAM1	635.108	1248.36		1480.75	1175.71	1440.44		895.328	855.426		621.116	1003.45	1188.97	622.625	870.542	1004.71	1263.98	1274.82	810.71	843.688	665.712	1068.24	1198.83	614.552	900.623	633.945	1187.26	941.213	1275.45	737.158	673.309	759.12	930.483	561.029	853.83	748.991
DAG1	469.766	428.407	705.29		757.214	232.717	571.322	573.129	666.704		358.928		629.639		544.92	687.308	462.569	520.038	447.894	907.146	559.564	977.256	601.005	813.547	421.162	526.078	420.593	426.026	368.188		496.518	686.619	430.167	508.936	719.424	665.267
DAP3		2187.89		1389.42	1072.45	940.672	1545.32	1229.6					3626.42	3964.75			2219.42	1885.87	2912.31		2250.11	1655.99	2280.69		2404.16						962.042	1379.52	2294.13	1707.63		2803.83
DARS1	17814.6	19796.6	12320	18433.8	11811.2	17326.8	17752.5	18318.6	17632.4	18627.2	18705.4	13143.7	18123.8	20595.6	17356.8	11490.3	18512.5	19016.2	19671.7	15046.1	18817.4	20853.7	18034.6	15540.5	16119.8	18353.9	18491.8	21061.4	17184.1	10727.3	18178.3	17737.1	18439.6	18671.9	20525.1	19816.7
DARS2	9017.38	9164	6827.15	8433.81	5667.06	9148.9	9230.44	8810.17	8392.49	6318.26	7734.08	5079.68	10580	9646.77	7040.75	5507.25	9155.04	9800.05	8528.47	5502.62	9293.29	9024.34	8815.17	8142.81	8715.39	8818.77	9108.84	8801.46	8006.58	3791.63	8359.82	8914.81	8493.57	8701.73	8161.98	9133.48
DAZAP1	1795.78	929.716	1811.69				1669.13	1025.96	1104.97		1082.48	2729.3	1848.29	1656.39	1186.51	1259.82	2424.47	1749.99	1939.29	1415.77	1812.51		1819.06		1140.5		862.749		2060.05		1742.45	1799.38	1389.22	1297.58		3057.28
DBN1	2791.23	2306.93	3796.93	1760.66	3339.79	1938.91	4077.69	2747.57	1852.97		2778.02	2395.27	3106.11	2052.65	2784.15	3343.28	2461	1593.91	2907.04	1664.8	2537.88	1442.72	3431.2	2193.42	2495.65	2607.61	2209.23		1754.69	3867.97	3709.18	3413.48	3143.16	2627.51	1963.81	2640.41
DBNL			953.547		1229.5		380.7				369.411					950.201		311.995		767.016			257.35						611.551	397.697
DBR1	6796.39	5352.38	7111.14	6261.35	6578.29	6295.33	5589.15	6037.32	5207.88	6749.74	6578.29	7454.92	6328.18	6408.05	7668.84	5169.21	5898.05	5000.44	5241.95	6878.14	5144.49	5438.5	5548	5990.62	6200.43	6707.85	5676.53	6103.12	7556.46	6571.7	5591.6	5537.44	5118.67	5390.52	5968.9	5935.97
DCAF1	1518.78	1556.28	1979.65	1587.39	1545.28	1596.55	1227.98	1383	1409.09	1687.1	1611.3	1303.68	1295.44	1587.4	1129.83	2019.32	1308.02	1723.1	1165.64	1387.66	1482.74	1392.08	1604.57	1649.94	1454.71	1669.6	1500.61	1712.65	1616.15	2476.47	1193.45	1419	1337.27	1349.13	2328.29	1870.04
DCAF13	1185.94	927.174	1353.37			1342.18	1156.04	821.217	1288.74		1310.46		1149.26	1215.77	1307.43	1521.32	1701.09	1173.09	1578.17	1291.59	1395.93	1057.37	1160.12		1306.13	1321.65	1147.98		1181.9		875.643	1298.58		851.587	820.481	1376.26
DCAF5	2671.77	2500.78	2168.68	2140.99	1303.88	3158.16	2751.48	2129.84	2354.29	2905.97	1951.22	2239.69	2660.79	2036.03	2146.41	2943.23	2538.49	2292.22	2423.92	4127.35	2256.97	2959.79	2366.54	3193.29	3231.98	2904.75	2893.17	2275.54	3562.98	2298.2	2663.16	2605.82	3219.98	1674.88	3028.57	2944.21
DCAF7	3143.8	3344.49	2108.65	3412.82	2487.41	2104.03	3147.11	2572.4	2917.34	3003.27	3288.95	1767.42	3643.48	3295.52	2740.97	2347.58	2696.47	2884.94	3079.31	3131.9	3843.02	3067.25	3447.25	2839.41	2913.42	2607.71	2710.32	3976.32	3100.95	2959.56	2903.94	3406.37	3489.98	4103.31	3547.27	4175.62
DCAF8	2306.33	3419.9	2895.4	3425.15	3493.16	2444.87	2799.73	2380.72	2746.94	4007.1	2697.35	6796.74	3265.28	4698.65	3850.85	4473.15	3700.11	3604.32	3388.98	3151.96	3103.69	3128.69	4430.09	3535.74	2906.55	2345.76	3612.07	3814.8	3497.77	10823.2	3462.27	3605.28	4130.81	2526.58	3668.67	3167.86
DCD	324.989	232.837												729.895		953.663					1273.47			1461.12	1141.05						429.435	469.573	1046.71			216.861
DCK	2457.08	1904.96	1043.98	2404.17	1745.51	2033.55	2169.29	3062.55	1987.85	1335.42	2444.97	2087.9	1255.65	1767.35	1744.76	2019.47		940.091	1090	651.652	2424.47	1607.23	1917.84	1530.1	1367.58	2077.26	1760.21	2713.52	2445.72	1776.3	1358	1786.85	1498.86	2318.19	1166.96	2384.87
DCP1B		450.973					825.375		952.943				231.143	1083.95	606.402				1172.31		417.108	710.163	829.886	1198.36	906.718	734.87				1262.02	600.673			547.401	828.519	619.267
DCPS	1316.26	1356.34	1627.13	1390.69	1687.61	1374.71	1492.62	1370.31	1180.8	2001.41	1082.94	1274.45	736.636	1662.89	1976.27	1423.25	1297.79	1144.72	1576.43	1722.47	1575.24	1719.93	1420.16	1968.67	1597.12	2407.94	1680.01	1945.8	669.095	1585.86	1396.01	1190.18	2098.65	1240.11	1970.07	1011.3
DCTD	353.516	663.937	247.086	347.203	357.66	841.273	370.286	431.826	284.859		462.774		311.66	810.503	268.734		331.86	1069.78	851	453.618	682.668	722.28	335.454	374.976	1039.71	557.177	680.165	759.394	434.89			207.727	208.573	270.725	581.612	413.547
DCTN1	3878.49	3981	2969.24	4068.43	3707.41	4023.76	3625.81	3404.71	4649.38	4498.02	3711.21	3505.09	3997.14	4234.42	3889	3123.13	4020.7	3374.8	4278.33	3811.06	4669.52	3947.14	4177.94	4015.99	4074.9	4010.84	4290.71	4256.7	4666.46	3974.76	4900.25	4717.88	4660.26	4271.78	3772.5	3974.48
DCTN4	1882.72	1419.22	1149.72	1622.9	1039.08	1304.98	1444.02	1070.03	1488.45	1395.03	1580.34	1466.21	1585.63	2000.24	1468.33	2239.75	1666.16	1560.38	1470.78	1823.62	1531.69	1697.25	1351.89	1353.69	1562.59	1586.84	1283.39	1444.11	1636.44	1350.28	1292.81	1433.1	1226.46	1534.48	1696.83	1994.03
DCXR	24366.1	21757.9	22944.2	22896.5	20746.9	22734.9	23443.8	21532.8	19901	20466.6	20558.5	17774	23265.7	21547.7	23517.9	20179.3	21079	21345.6	21994.5	18456.6	22584.3	20921.3	23192.1	20040	22587.5	21756.4	22743.6	19243.1	21340.3	19867.2	19405.3	20345.9	17650.5	21219.9	22876.8	16613.8
DDB1	14318.4	15395.5	7612.2	12063.4	8366.41	14386.2	15306	14344	14347.6	17756	13917.8	6540.04	13539.5	14292.8	12555.8	8199.59	15735.2	15582.2	12899.1	9727.8	14476.7	15879.6	12315.7	9663.47	10328.5	17129	14918.6	17172.7	11669.3	7493.67	15577.3	14508.2	14278.4	14237.8	14324.9	14173.2
DDB2	4826.08	2746.17		1808.28	5321.51	3305.47	3845.22	2951.9	3678.23		3033.17	2222.11	3310.83	2948.03	3023.46	2990.28	2395.68	3670.6	2766.76		3261.37		1811.86	2986.37	2176.51	3558.97	3216.79	2131.96	3356.27	1694.4	2889.42	2667.79	2411.38	4042.29		2498.26
DDI2	1807.97	1268.31	2556.88	2313.34	2101.65	1739.77	998.604	2315.22	1685.49	1960.72	1894.91	1629.71	1771.5	1329.44	2160.3	2244.71	1420.88	1945.57	1248.91	2270.87	1275.36	1104.27	2101.44	1374.62	1738.9	2500.66	1625.53	1792.93	1903.29	1827.58	1792.79	1443.28	1203.1	1794.97	814.415	1985.32
DDOST	34780.1	34687.9	26988	36965.6	36052.7	32166.6	34674.1	32751.8	31759.2	36500.2	34980.6	34922.5	36081.9	39979.7	37247.7	36218.4	36635.1	36206.3	36872.5	38195.7	39081.4	33271.5	35373.9	36770.8	30144.8	33078.1	34766.6	31062.7	31098	29134.9	33087.8	25767.4	38116.3	32939.5	37474.3	36305.5
DDR1	1347.55	1019.98	1178.8	1342.77	1364.75	1386.04	1743.03	1303.33	743.896	1191.26	1796.24	1170.53	1502.24	1541.71	1765.58	1016.52	1747.9	1701.1	2106.25	1427.2	1869.33	1543.04	1419.16	974.761	1332.66	1856.13	1883.45	1708.94	1510.2		770.948	948.027	1325.41	1601.78	1303.5	1692.95
DDT	1456.86	2055.01	390.564	760.228	764.033	1682.48	2072.38	1464.64	1567.7		2706.99		2852.64	2005.2	1689.33	1130.44	3489.05	1882.35	4235.37	1350.38	3720.59	2215.88	2391.72	1339.34	2856.91	914.541	2375.71	764.741	1263.47		2096.8	3201.41	1567.99	1760.66	1749.67	1164.84
DDX1	14118.4	14205	12497	14556.7	13023.1	12782	14113.1	13776.7	12040.6	12647.3	13696	15233	13916.8	13151.6	13187.7	14597.3	13313.1	13692.8	13305	14814	13698.3	13530.1	14877.9	15976.6	13868.6	14437.1	14504.7	11248.2	14980.1	11100.6	13003.2	13034.7	13804.5	13403.8	13398.4	13376.4
DDX17	5140.23	4595.48	4825.83	4571.63	5613.98	4953.03	5253.24	5166.7	4941.14	3324.38	5623.85	5320.41	5241.74	5160.07	5178.33	6037.07	5233.9	4792.38	4505.68	5288.46	5154.57	4173.13	5023.14	5257.38	5061.72	5299.79	4393.04	3305.33	5451.04	3979.98	5184.87	5259.65	4171.59	4937.6	4469.21	4913.28
DDX18	2096.78	2018.02	1631.18	1851.9	1848.85	2549.61	2395.31	1899.86	1734.07	2763.53	2041.17	2812.16	2766.89	1507.26	2547.79	2058.22	1709.07	1964.79	2111.16	2263.84	2104.37	1916.96	1425.18	1088.08	2096.53	2000.53	2225.28	2496.09	2102.8		1663.59	1600.63	1626.68	2474.23	1651.59	1896.45
DDX19A		93.6071		295.129		141.192			206.16			157.89	217.773	311.52		112.542		327.824		325.816	155.641	226.941				258.05	269.114				303.188	239.121	414.345	293.221		316.333
DDX20	3891.7	4998.4	2523.82	4104.51	3126.84	3147.34	3851.13	3404.3	3404.22	3133.74	4571.97	2672.77	4968.32	3967.37	3704.37	2684.93	3340.41	3670.64	4055.77	4370.35	5186.55	4993.12	4286.08	4737.07	3778.09	4358.59	4043.46	4213.37	3986.92	2486.93	3418.04	4404.93	4713.79	4582.03	4482.22	4748.11
DDX21	13924.4	10961.9	13594.3	11904.9	13118.7	13294.8	13981.3	11751.7	10822.2	8071.23	11892.6	14095.9	12801.9	12368.5	11996.3	14043.2	13019.2	12945.4	12738.3	13417.7	11936.3	10519.1	14538.8	9944.02	12712.7	9770.02	14316.8	6895.66	11882	7451.84	11075.9	9943.35	8124.46	13492	12513.6	10671.3
DDX23	1932.18	2707.43	2462.89	2254.03	3419.96	3231.33	2373.5	2681.22	1436.39	3376.86	2602.24	2691.7	2183.69	2863.79	2615.62	3148.05	2683.74	3207.59	2435.6	3273.28	2434.79	2363.72	2825.29	2144.99	2785.38	2706.23	2619.84	2787.42	3662.41	3543.83	1484.85	1998.72	1899.22	1984.05	2729.27	2071.93
DDX24	1062.39	1189.03	1079.54	1266.21		1453.37	1367.93	1461.18	1551.95		1388.96	1113.42	490.265	1030.43	1566.5		1694.19			1183.3	1042.93	865.681	909.163	1237.44	1392.55	1269.88	1348.51	1613.85	835.127		749.191	935.422	707.497	1438.62	1465.28	745.446
DDX27	1779.29	1182.72	2425.84	2291.92	2287.64	1321.48	1342.96	1714.23	1828.36		2198.78	2509.2	1727.02	1445.92	1645.77	2543.81	1639.3	1751.01	1405.25	2011.16	1592.41	1367.55	1799.09	1994.87	1486.6	1484.62	1908.31	1182.2	1247.35	1962.47	1588.6	1349.56	1275.05	1466.11	1956.61	1419.16
DDX28	800.102	913.725			554.213	655.853	664.724	236.558		664.184							734.725	816.194			988.334		1271.22									956.06
DDX31	811.041						560.782	779.969			1040.72		908.782	670.192		705.286	822.545		538.886		402.546												907.834		754.705	826.189
DDX39A	4506.56	3553.47	2975.98	4172.52	2022.46	2718.14	4028.14	2705.83	3102.15	4328.8	4034.33	2003.68	3282.96	2890.49	3220.91	1535.16	2439.64	3029.11	2420.74	2453.27	4069.7	4069.85	4586.64	3731.84	1887.66	3908.61	4263.83	5000.86	2692.89	1389.88	3591.9	2098.17	4581.46	4096.05	2505.42	3158.8
DDX39B	4929.45	4252.64	3986.94	3101.22	4341.55	913.368	5307.49	3280.68	2637.39	3178.28	3552.15	4341.86	3667.9	3949.21	1973.68	2932.01	2611.7	2737.04	3699.69	1900.6	3929.98	4157.77	4371.1	3672.98	2805.95	4297.55	3339.34	4471.49	2736.2	3385.04	4094.59	2177.93	5319.39	3842.19	2639.33	4776.78
DDX3X	2567.52	3202.2	3317.13	2543.2	399.928	1998.42	2286.39	2235.1	2158.24	1761.48	2603.38	2355.75	1812.18	3029.41	2040.26	2591.36	2058.36	3629.11	1713.12	3017.32	2200.38	2599.77	965.24	2397.23	3311.97	1204.63	3694.04	111.976	2237.83	1604.59	1433.11	2338.67	2134.24	2674.32	2481.01	1284.59
DDX41	2479.07	2204.34	2153.4	1585.84	1737.68	1955.74	2135.57	2110.26	2008.77	2249.72	1811.39	1875.67	2260.4	2131.75	2478.68	2133.14	2405.56	1671.42	1972.4	2016.74	1694.72	1285.6	2031.94	2288.2	2101.82	2011.23	1419.77	1883.26	1711.82	2273.94	1885.37	1925.21	2418.3	1908.77	1922.36	2009.85
DDX42	3385.12	2381.34	5947.6	4348.36	7265.66	3027.5	3488.43	2850.67	3231.33	3423.42	4205.86	4472.88	3935.65	3553.64	4047.04	4704.71	3503.46	3162.94	3229.19	3916.03	2940.33	3050.12	4367.09	3721.95	3316.61	3280.33	3646.55	2255.57	3945.75	3425.58	3348.27	3470.97	2574.19	3161.01	2610.42	3304.56
DDX46	1762.48	2798.15	2509.35	2577.41	3026.3	2591.46	2263	1453.95	2120.4	4757.17	2462.7	3159.48	2053.33	2524.48	2078.51	2508.82	2130.83	2160.18	3021.9	2428.37	1800.61	2408.79	1895.84	2371.51	2928.37	2272.56	2239.83	2225.3	2529.5	4447.36	2767.28	1873.37	1887.31	2105.67	3143.1	2374.24
DDX47	219.574	527.557	615.54			560.459		472.536	215.294		412.124	857.394	502.938	439.181			533.76	361.762	306.662	501.095		263.68	383.328		905.987		532.494	303.118	195.992		195.721	207.866		353.994
DDX5	21837.7	23277.9	20373	23885.2	21305.6	21745.6	22270.9	23982.8	21576.7	13711.1	21194.1	23236.9	22558.4	20395.8	23037.7	21841.7	23485.2	24271.8	21168.2	25046.1	21889.7	18980.2	21190.6	21008.8	23159.3	19887.7	22230.5	18061.3	21352.3	13448.6	23599.1	22549.8	19627	21373.8	21726.6	19332.4
DDX50			255.794	356.032	254.071								420.068								256.906		210.21		414.173				197.383
DDX56		591.899		171.491	517.644	717.703	284.105	489.838	545.632	398.74	297.45	817.078	559.534	408.732	581.912	1052.49		312.526	1025	753.618	322.691	549.639	524.91	440.636	407.307	550.353	322.366	206.516	492.346	866.568	282.732	370.9	616.74	528.869		285.72
DDX59	353.838	417.224	435.788		570.327		322.899							413.595			711.819	699.044	1317.44		792.206	845.893	1035.32		1176.11	482.829		505.533	255.736		603.146	497.99		465.118		493.065
DDX6	16337.6	17774.8	9190.28	15132.4	9896.94	18379.1	16970.2	14951.3	13665.1	16753.9	13212.7	5869.24	15932.6	13019.4	13667.8	7736.06	15877.6	16354.6	17880.7	9760.31	15680.5	18796	14089.9	11243.8	13141.6	18577.5	13991.9	18999.8	14583.1	10307.4	17727.8	15485.1	15905.1	16378.4	15831.3	16199.3
DECR1	20520.6	18601.8	22830	21185.4	20800.1	19080	20246.3	21530.3	24733.6	19179.9	17897.3	21470.3	19169.6	16660.8	19658.7	17169.9	17698.3	14732.4	17061	17998.8	17648.3	18183.2	17843.3	22936.1	20104.9	18983	15774.3	18326	18463.2	19118.5	19203.9	20191.7	18312.6	18432.5	18644.1	19986.4
DECR2	1742.63	973.366	2296.66	1278.63	1306.4	1368.1	1578.75	1192.17	1223.31	1626.6	1113.54	1435.97	1061.69	878.926	2102.36	1387.01	879.847	1203.98	1470.26	871.045	1568.11	1296.95	1484.09	1743.93	1153.78	979.299	2169.83	1032.55	1114.33	828.232	1220.71	755.67	979.495	1032.78	1554.57	1592.57
DERL1	13584.2	13563.3	6863.04	10013.2	10144.8	11395.5	7198.36	13537.7	12266.3	8233.5	13053.3	11173	14335.9	16131.8	12636.3	8698.04	14022	16897.7	14940.7	12259.3	11055.1	12728.1	3422.05	5036.58	14276.5	12257	15719.2	8643.36	14845.6	6398.84	12774.9	16013.2	12145.7	13311.5	12692.7	12590.1
DERL2	3715.35	4114.4	2629.45	2838.35	1552.28	3602.25	3969.81	4213.25	5498.19	3865.24	4625.29	1692.75	4476.19	5574.87	5490.04		3936.51	4319.36	4054.06	3809.37	4732.77	4893.26	3356.46	2264.87	4858	4537.37	4047.59	3885.82	5572.76		3565.58	4030.5	4546.84	5454.34	5234.64	4989.48
DHCR24	6725.6	5015.97	5113.9	3824.61	3992.75	7678.95	6901.56	4913.23	6535.89	7478.58	6900.48	3041.12	4076.41	5143.09	8375.09		6306.77	6475.01	5499.55	3038.24	3482.77	6632.17	5098.1	4091.69	3609.05	5197.03	4639.23	8904.54	6380.12		6206.58	6631.4	4658.85	7579.58	4771.91	5229.15
DHCR7	7998.36	5989.09	1982.76	4003.18	2363.41	5160.36	8722.47	5754.52	4733.44	5171.24	6880.82		5032.56	4830.06	3988.73		4358.95	6640.93	3908.52		6648.39	7721.52	4035.32	1941.92	2790.49	8748.19	4475.17	6902.4	4894.17	2534.63	7187.03	4139.23	5934.42	7421.13	4869.27	7458.54
DHFR	5982.11	2813.83	6592.5	5389.2	5791.43	3209.4	5294.86	4140.41	4901.47	4567.13	4209	5477.72	5319.83	3921.44	4370.05	5749.34	3433.14	4161.35	2904.56	4257.48	3010.74	3861.94	6524.54	3306.94	3934.63	3694.97	3435.03	6990.08	4272.65	6397.44	2646.28	2490.2	4767.23	5368.64	4454.07	5321.87
DHODH	619.92	451.909	1092.03	1177.78	1208.38		600.187	926.601	908.805		748.93	243.421	783.809	458.518	744.979	966.687	1129.46	463.691	606.022	738.103	685.932	918.263	519.865	420.877	1064.5	831.457	676.195	764.661	883.051		629.77	593.995	168.423	892.645	1037.34	547.563
DHPS	3499.71	3659.84	3736.93	3517.59	4786.46	4106.02	3223.89	3894.27	3450.64	3587.03	3312.33	3167.81	3616.16	3070.99	3914.15	4049.34	3583.39	2816.82	3461.02	4920.98	3031.72	2835.68	2436.25	3681.83	3354.14	3114.09	2965.45	3884.48	4544.57	3893.48	3567.94	3518.39	3910.75	2951.28	2961.12	2512.6
DHRS7	1389.39	1433.45	1580.89	1789.03	1857.12	1272.07	1606.96	1852.12	1174.58		1520.92	1145.15	1346.81		1679.31	1260.03	1521.93	1484.32	1713.31	825.444	1730.1	1346.5	1359.02	1396.05	1314.56	1435.46	1594.95	1177.64	1797.26	1311.18	2470.77	1543.97	1012.6	1990.37	1095.38	1357.91
DHRS7B	2786.94	2778.98	1768.66	2500.93	1589.66	3612.69	2955.55	2560.11	1730.92	1896.49	2222.91	2192.54	2325.06	2546.98	2550.28	1507.69	1932.47	2235.41	2223	2562.06	2545.03	2614.41	2159.92	1459.04	2371.22	2404.74	2926.47	2240.93	2417.87	3893.74	2708.28	2110.91	2153.24	2168.58	2165.91	2412.29
DHTKD1	4717.77	4420.75	5309.14	4063.5	2280.6	2288.67	4481.74	3551.59	3983.71	4711.16	3803.95	2617.45	3912.01	4477.16	3416.62	2944.52	3307.3	4338.45	7095.86	2412.8	5992.66	5452.41	5669.15	5183.41	3500.39	4225.53	3468.28	6951.26	3960.93	2903.1	5069.89	3384.65	5327.03	4144.14	4232.29	5737.14
DHX15	16074.2	13498.2	12334.1	13278.9	13515.8	13173.4	15852.6	13989.1	15684.1	11520.9	17488.1	12059.4	14391.6	14872.7	15367.3	15535	16023.9	16710.9	15377.5	13884.6	13059.9	12562.6	11449.6	10473.2	14413	15485.7	14299.8	10382.8	16200.8	9581.81	15040.5	13006.6	13074.3	15924.9	15317.1	13372.8
DHX16	2127.95	2497.65	3886.63	2057	2201.22	2369.46	1983.33	2313.91	1894.97	2489.15	2770.95	4050.4	2353.88	2561.25	2905.24	4199.3	3388.9	2842.74	2355.4	3192.46	3174.43	2245.31	2816.61	2432.19	2926.86	2001.15	3317.53	2338.02	2472.73	4418.68	2467.53	2323.81	2211.96	2417.37	2443.71	2033.21
DHX29	1810.11	2345.19	1480.97	1738.65	1605.22	2306.06	2191.89	2546.38	1947.55	2056.86	1680.07	2270.73	1798.15	1641.29	2172.31	1972.97	2242.09	2068.5	1933.95	1945.02	2218.57	1835.03	2318.02	1954.08	1892.49	2509.6	1825.27	1962.79	1985.02	987.411	1796.05	1921.85	2118.6	1921.39	1746.53	2054.91
DHX30	5746.73	5524.78	5963.31	5834.96	5389	5123.79	5783.61	5475.72	4649.47	4108.64	4690.23	4559.5	5690.01	4852.03	5000.1	3747.69	5096.25	5142.17	5716.98	5260.63	6135.94	5699.2	6628.89	6376.07	5442.82	5513.52	5292.12	5354.36	5525.18	4062.47	5179.4	4934.59	5341.25	5165	5145.63	5017.11
DHX36	1528.14	1258.38	1995.05	1729.03	1578.45	1350.35	1346.14	1457.16	1395.15	1221.64	2105.3	1685.5	1720.01	1896.91	1979.96	1641.65	1960.76	1808.64	1404.83	1841.19	1760.75	1959.18	1766.78	1791.88	2152.52	2279.96	1717.22	1880.53	1702.23	1818.72	1739.46	1896.2	1775.9	1676.72	2049.16	1474.88
DHX38	2391.62	2623.57	2132.49	2161.08	2129.02	2265.01	3054.28	1627.4	2131.48	1562.21	2688.77	2498.94	2779.01	1763.96	2379.7	3260.19	2989.04	2644.31	2353.76	3812.75	3412.57	2291.47	3266.93	2343.94	2202.67	2251.78	2559.93	2806.92	2936.73	10950.4	2212.56	2934.62	2034.72	1950.75	2637.67	2473.79
DHX40	821.711	837.715	1083.15	1029.08	1237.56	1472.35	719.243	570.41	782.653	1455.31	1334.56	1110.77	1274.95	934.578	1143.46	1193.35	1471.04	887.109	805.458	1080.03	635.657	868.513	1225.13	857.978	767.589	1071.4	927.205	666.464	1068.22		722.178	732.133	872.912	1229.25	1123.18	759.265
DHX57	570.497	921.864	1439.42		1188.71		1216.28	1239.86	766.243		903.771		773.567		961.818		1306.3	1066.89	1241.9		1625.16	899.026	918.048			754.217	595.324	3872.91						726.553	1401.52	1153.66
DHX8	505.416		356.236	445.508	258.994	352.991	660.185	800.81	228.442	632.322	591.591	843.072	336.993	226.604	296.286		78.1115	267.353	232.603	332.01	375.358	555.555	507.19	534.573	326.956			486.312	759.633		312.721	603.472		1022.7	609.321	448.765
DHX9	24132.2	23986.3	16687.5	20645.5	17021.3	20821.8	22903.1	21693.3	21764.9	17072.7	22366.6	16131	23861.9	23186	18955.9	15922.1	22600.7	23414.9	25353.8	18354.3	26287.4	24799.4	25306.5	20619	23021.9	21478.3	24634	25280.8	20355	15709.2	22036.7	22268.1	22900.2	21047.4	21763.2	23905.6
DIAPH1	6900.73	7631.57	7065.57	6743.92	6070.01	7406.96	6243.77	7105.65	6337.79	5404.29	6972.09	7077.69	6369.37	7029.06	6464.29	6675.28	6637.6	7002.9	7093.73	6852.21	6563.23	5899.94	6990.65	7016.4	7437.36	6243.08	6891.28	6340.93	6922.45	5244.51	7063.27	7732.42	6405.63	6553.82	5594.87	7123.75
DICER1	1952.55	1820.33	2470.2		1872.06	2123.73	1902.92	1728.11	1258.83	1477.63	2014	1731.68	1486.86	1502.37	2047.85	1649.62	1733.48	1618.48	1698.52	1987.02	1536.52	1721.28	2072.35	1482.22	1827.66	1499.64	2003.18	1361.42	2180.36	2320.77	1510.23	1810.98	1955.22	1735.02	1865.62	1529.41
DIDO1	1644.06	886.442	893.287		858.904	868.37	1445.72	1082.86	1506.29	1071.72	1072.08	686.109	685.608		868.232		892.409	480.226	628.234		1178.54	645.762	1158.77	659.822	909.694	830.687	95.8929	685.922	1850.16		1214.39	749.724	645.108	1320.78	453.406	739.25
DIMT1	2042.54	1899.65	2100.73	2766.37	2306.31	1884.37	2244.35	1815.77	1272.62		1985.24	3296.67	2651.86	2350.49	1715.14	5075.76	1720.09	1754.41	2363.65	3214.65	1360.07	2156.89	2168.52	3237	2152.17	1466.25	1989.06	1659.3	1292.34		1548.92	1806.53	1807.53	1860.15	2253.01	2437.36
DIP2B	2944.13	2793.03	4031.82	3101.45	3242.83	3209.37	2592.81	2854.94	3361.11	4803.28	3151.6	3965.96	2759.85	3275.84	3251.8	3640.88	3560.35	2430.45	3391.12	4414.21	2497.5	3031.56	2977.1	3618.17	2745.02	3263.25	3211.43	2914.75	3171.33	4834.93	2580.52	2253.64	2951.56	3705.28	3183.78	2736.85
DIS3	4614.38	4430.16	3925.24	4543.54	4111.2	4155.66	4391.09	4633.31	4655.16	3235.99	4815.85	4600.88	4229.74	4327.17	4759.87	5289.78	4382.99	5400.28	3751.84	4212.91	4561.6	4187.59	4795.84	3513.46	4871.8	4788.97	4755.48	4203.16	5198.36	4962.18	3068.47	4260.49	3885.61	4606.11	4488.05	4335.17
DIS3L2	491.012	299.365					460.602	388.697					755.11	779.091			788.123	440.574	491.509		543.092	503.616	324.318	365.609	722.631	509.77			600.031			257.999	578.578	245.34	855.179
DKC1	1888.59	1481.72		701.404	684.432	1710.5	2296.57	981.462			1392.86		1482.76	2273.03	1460.84	1213.57	1323.39	1838.49		806.841	1592.98	1328.16	1261.33	1121.83	1908.99	2075.48	1099.51	1365.74			1409.99	1401.22	1836.09	1519.98	1036.7	1047.84
DLAT	2216.81	2839.56	1036.04	3167.68	2196.73	2747.01	2600.23	2820.04	2903.43	4186	2109.51	1863.17	2370.4	2805.4	2680.7	1652.8	2274.5	2295.26	2370.25	1962.53	2419.85	2523.05	1992.99	2091.43	2554.27	2514.44	2274.6	2805.51	2443.88		2814.24	2010.74	2850.05	2850.09	1932.68	2940.22
DLD	3973.31	2796.73	2959.1	4131.85	3975.5	4793.13	3358.3	3391.78	4027.68	5061.18	4052.27	3039.26	3270.47	4079.31	2838.73	3323.79	3057.45	2792.24	3548.55	3353.22	2813.35	3204.81	3256.43	2346.55	2428.82	2468.15	2391.18	3411.5	3227.52	2800.05	4063	2903.86	3467.84	3654.27	2701.72	3135.59
DLG1	405.293	410.194	930.162		699.508		548.964	559.465			681.512	1403.74	700.157		866.811		1037.84	743.717	287.329	1263.61	332.775		642.675		693.242						878.303	320.796	342.907	454.959		947.178
DLST	5057.29	6429.9	7321.47	6425.15	8211.62	5689.74	4671.35	6095.17	5539.57	5453.8	5006.49	6202.38	3655.62	4729.73	5301.72	6874.44	4506.97	4692.63	4998.91	6580.54	3083.19	5622.01	4761.91	6547.89	6727.61	5967.15	4586.75	5462.89	4940.76	6174.92	5037.49	4686.4	4734.63	5004.02	5274.24	5162.22
DMXL2		457.563					477.989	106.661	136.023										221.487			153.714	458.837			285.309			434.105		286.565	375.068		442.458
DNAAF10	2015.18	1963.62	3562.09	3219.62	2104.17	2596.07	2377.99	3118.95	2432.47	3458.35	2662.18	3276.92	2961.09	3184.74	3050.1	1874	2588.48	2098.94	2657.24	2674.88	2349.5	2050.75	1849.28	2838.27	2797.56	2171.41	1713.14	3387.28	2602.45	3252.89	1885.15	2799.02	2229.22	2608.02	3414.1	2634.87
DNAAF5	2095.92	1433.18	2686.02	1838.87	1589	1719.14	2003.8	1911.01	2199.3	2525.14	1919.53	1601.36	2159.05	1702.98	1849.23	1315.9	3330.29	2380.66	2642.7	2130.36	1839.9	1735.73	1934.3	1974.35	2112.25	1957.99	1862.54	1540.66	1663.77		1964.28	1995.18	1851.76	1359.35	1456.18	2003.48
DNAAF8		214.91		1298.58						931.976															753.749						407.176	293.884	675.707			920.113
DNAJA1	2508.52	3061.15	3071.75	3693.07	2575.57	2593.87	3257.78	2599.88	3764.18	2957.31	3348.26	3081.34	3042.64	3121.69	2463.34	4182.12	2839.22	2667.43	3970.69	4706.32	3142.15	2566.93	2914.11	2845.19	2821.04	2871.42	2649.57	3200.32	2791.11	3339.74	2514.52	2585.52	3149.26	2515.57	2672.29	3318.15
DNAJA2	605.398	697.459	751.587	611.263	691.733	875.551	597.183	901.073	716.373	1312.99	968.398	1214.45	788.368	594.993	592.829	426.091	773.72	691.521	1154.05	1060.07	1059.39	962.991	782.982	871.439	842.344		616.846	1141.23	1408.76	680.864	701.732	926.676	664.666	732.382	436.402	974.593
DNAJA3	4336.52	3238.62	5829.56	4585.07	4632.49	3467.22	4268.83	3481.81	3651.02	3753.13	4932.46	5658.84	4597.21	4606.17	5170.08	6376.46	4391.44	4045.05	3817.11	4945.33	4800.76	4063.14	4049.17	4860.69	5807.63	4637.46	5500.34	3904.53	5530.07	3729.03	4357.88	3309.86	3802.87	4008.55	4032.77	4394.38
DNAJB11	626.741	618.126	484.708	496.325	466.931	749.73	573.921	638.169	900.221	568.719	961.954	480.529	538.651	387.251	703.322	786.141	1255.06	547.452	586.626		693.096	673.574	1193.9		1025.82	409.228	671.677	662.808	492.095		457.126	480.065	634.326	603.068	264.569	676.18
DNAJB6	1888.51	1052.51	2854.99	818.889	2668.05	2073.97	2076.72	1732.07	1766.44	1424.62	1692.51	2150.74	1674.45	1914.61	1442.49	1238.35	941.275	888.252	1556.72	1180.65	1214.54	1413.18	2083.95	1536.81	2046.73	1624.26	1830.95	1176.93	2008.95		1723.61	1212.24	2153.57	2183.8	1491.01	1667.4
DNAJC10	711.021	811.68		1079.19	651.624	721.934	1132.52	514.381	767.483	789.883	901.454		896.124	975.015			820.383	981.445	1590.78	1312.03	822.141	1076.88	1026.95	588.818	764.621	1105.82	707.986	957.533	719.324			891.509	1175.29	1125.57	1554.42	875.947
DNAJC11	1114.46	1113.64	1207.82	1988.04	1162.18	1073.36	1228.09	1554.58	1617.45		721.927		1417.18	1224.43	822.728		1401.75	949.725	1604.03	792.595	1677.35	1500.92	1637.98	2229.33	991.933	1037.97	1522.65	1941.61			663.844	1311.61	940.314	1413	1347.33	1426.38
DNAJC13	1291.97	1617	903.342	1054.58	1632.58	1493.7	1322.98	1527.9	1351.76	2293.28	1431.61	854.638	1437.63	1442.14	1267.27	1598.35	1570.57	1429.4	1429.33	1436.88	1360.04	1196.33	1174.55	929.064	1843	1437.82	1640.66	1380.32	1840.2	1495.25	1454.47	1173.41	1105.99	1768.62	1072.31	1536.28
DNAJC2	1789.47	1316.85	2576.93	1420.93	2346.85	1329.38	1916.6	1613.86	1565.68	1139.86	1821	2322.64	1774.66	1839	2191.71	1897.08	1368.95	1510.28	1424.25	1645.95	1740.42	1372.59	1351.91	1610.24	1780.08	1800.22	1152.93	755.66	2406.75	1598.85	2036.84	1689.3	1424.93	1816.44	992.835	1535.89
DNAJC7	702.907	637.609				551.993	591.842	791.485			802.396	720.179			487.667		728.322	524.064			241.859	569.98	687.299	809.131		424.911		756.065		1383.54	576.865			611.444	541.345	850.284
DNLZ	2961.04	2347.98	2702.94	3858.74	2453.96	2634.34	2224.33	3287.82	2550.1		3235.56	2278.49	2368.11	2808.15	2608.49	3562.66	2557.09	3087.59	2967.91	3944.24	2550.76	2427.3	2466.44	3492.87	2829.86	2426.51	2805.15	2348.64	2269.73	2118.38	979.437	3274.27	2192.28	2441.5	2779.54	2460.89
DNM1L	2642.23	2614.49	1605.37	2972.21	2277.07	2280.69	2037.73	2729.93	2397.62	2632.84	2976.33	2740.22	2214.16	2402.64	2556.68	2732.59	2174.98	2501.55	2301.7	2517.94	3190.58	2337.69	2302.37	2223.96	2336.78	2576.49	2513.3	2244.37	2664.35		3066.61	2773.27	3206.45	2470.52	3316.3	2351.57
DNM2	1615.28	1558.45	715.291	1390.23	1342.3	1374.78	1309.15	1456.6	1372.64	1273.14	1475.38	1557.12	1476.71	1114.96	1429.74	985.576	1923.58	929.87	1612.17	984.165	1251.92	1261.5	802.289	718.106	966.346	1182.9	1423.57	1027.92	1423.07		1554.69	1618.21	1307.39	1338.19	1316.82	1590.6
DNMT1	3329.6	3259.6	4682.19	4459.35	4282.18	3242.03	3086.68	3395.29	3464.73	3986.56	3861.16	4448.18	4202.39	3932.13	3747.96	4212.71	3406.37	4188.77	3786.53	4405.46	3443.29	3016.19	3713.32	3448.72	4200.35	3565.56	3212.93	3542.42	3431.22	4074.12	3101.64	2822.84	3443.55	3738.66	3721.08	3351.68
DNPEP	8721.02	10135.4	9255.99	9052.68	8001.25	8610.59	8797.79	8580.04	9075.83	8791.59	8566.9	7954.89	8028.69	9117.15	8701.43	8490.75	8219.47	9445.69	9639.67	7858.06	9181.29	9022.36	9903.03	10530.7	9090.75	8954.76	9248.08	9113.66	8961.36	7046.07	6744.01	7925.21	8260.34	7995.49	8616.01	10329.4
DOCK6	631.134	472.701	1105.73		504.916		383.226	229.322			308.03	596.417	209.634	423.802	371.856		544.506		780.459		724.31	456.604	551.061	416.421		261.105		857.822		397.939	605.243		442.222	505.134	615.28	379.763
DOCK9						942.128					981.603	544.189		2273.65			2357.51		2782.34		2164.21				1643.8	1785.55					1606.46	2339.06				2253.65
DPH1	1280.78	628.454					617.139	923.531	492.126		703.846		985.706	1432.87	853.673	837.11		1313.13	565.607		1399.61		888.143			781.795	911.192		1087.91			551.544		767.524	555.789
DPH2	35.2813	402.678	112.531			252.445	446.876	296.433	452.017		222.703	349.882	296.501	301.273	226.497	149.437	739.976	260.222	139.319	472.071	375.978	480.843	307.815			396.421	417.293	216.431	273.797		540.038	251.03				384.279
DPM1	3504.08	3313.79	4800.8	2880.46	2295.4	3458.15	3696.21	2978.95	3847.94	3721.82	2766.84	1843.45	2870.61	2557.81	2929.51	1799.93	3791.58	3068.23	2919.59	2437.68	3021.98	3932.81	2575.61	2166.57	2763.36	3658.92	3503.42	3092.75	3111.68		3207.84	3940.73	3237.11	2998.68	3641.19	2935.75
DPP3	7671.29	9636.16	6031.3	7145.28	6010.25	10316.8	9223.01	10493.4	9466.06	7880.48	8427.71	5658.67	7875.37	7372.77	7751.46	6165.48	8469.7	7394.03	8136.94	6189.15	7828.25	7756.02	7057.32	7950.53	6649.1	9377.06	7363.91	9258.91	7426.27	4278.97	7537.98	8798.37	7656.55	10540.5	7010.73	8250.98
DPP9	2561.58	3104.27	2446.83	3400.26	3090.75	3189.17	2600.91	2608.76	2388.45	3543.77	2969.03	1954.74	3439.44	2925.69	3374.61	2419.78	3150.38	3756.94	3172.41	2956.17	3130.13	2843.91	3094.22	2976.43	3226.24	2599.95	2982.28	2563.32	3380.82	3023.9	2664.82	2912.81	2606.28	3080.27	2992.5	2987.15
DPYSL2	575.501	906.414		777.107			504.862	518.76						641.826	1084.79	855.613		781.007	1219.33	1319.39	863.76	669.014	913.167		765.166	676.657	1539.5	1322.58	416.377			429.296	1132.96	746.78	833.352	871.46
DPYSL4	1757.25	1396.7	1342.53	1168.77	917.486	1475.43	1267.84	1696.47	1401.62		1390.14		1265.01	1625.29	1114.94	1710.74	1187.46	2035.35	1371.24	1354.1	1580.67	1335.08	2134.38			1479.98	1692.18					1387.87			1994.03
DRG1	5966.06	5780.95	4909.93	5714.02	5742.56	6900.62	6664.82	6320.92	6046.21	6864.36	6689.84	4941.24	5308.18	5238.17	5944.9	6362.19	5867.65	5428.09	5448.67	5546.77	6022.9	4690.82	4979	6543.68	6311.72	6625.48	5100.87	6332.02	6428.95	5600.46	4978.28	5387.58	5227.14	6064.83	6263.29	5398.19
DRG2	4718.29	3162.56	4797.24	4009.26	3609.72	5229.37	4079.83	3968.23	3585.78	3594.62	4311.62	3320.34	5193.58	5133.74	3691.74	4057.43	3809.8	4457.92	3921.1	3588.28	4247.19	3131.53	3133.09	3102.01	4017.83	3976.6	4441.83	3107.13	4651.57	2874.91	3416.43	3022.02	3600.66	4242.94	3757.3	4143.7
DSG2	1982.17	2115.37	2915.15	1776.45	2075.88	2334.02	1794.5	1643.01	1955.02	2013.3	1608.56	2566.99	2085.07	1673.54	2343.56	2376.33	2196.02	1767.6	2575.63	2286.79	1961.05	1775.52	2369.95	1938.56	2212.68	1596.41	2211.4	1509.03	2387.46	5649.37	2052.39	2064.34	2464.48	1811.47	2281.87	1207.29
DSP	5541.59	6147.07	6585.12	6282.19	7464.17	5232.7	6201.75	6012.47	7043.44	6926.81	6078.07	6689.64	5768.49	5799.83	5965.48	6671.46	5270.17	5509.03	6313.38	7127.14	5561.28	4834.27	5972.83	5664.86	9221.97	5232.66	5345.49	4672.32	6466.28	8000.83	5980	6146.55	6247.01	5199.76	6010.64	5825.56
DSTN	15470.5	22380.7	24730.8	27655.1	20172.2	21354.2	31854.2	23826.5	22834.8	23100	24870.8	29565.3	24663.3	27705.9	21677.4	24446.1	27483.9	29354.2	30250.5	27001.6	34373.7	26419.5	27043.4	27597.9	24275.6	29588.6	21744.7	8481.94	20886.8	20617.4	22098.9	23683	28498.9	21275.1	21404.4	18957.4
DTD1	1165.75	1662.2		1298.7		539.037	1485.97	1618.06	1605.38	751.697	1068.03		1115.92	1411.6		783.775	879.629	1602.04	1771.64	726.567	2399.49	1831.69	1722.02		1117.93	840.921	1631.43	1448.2		694.251	647.021	1079.33	936.646	1112.8	960.403	1760.17
DTWD1	493.187	627.948	455.093	840.48	450.912	1148.99	594.129				642.451	545.385	624.558	739.14	316.462			821.526	462.931	212.474	366.135	464.933	507.602	307.168	368.011	760.766	856.924	655.216	997.121		1045.31	634.916			489.113	355.421
DTYMK	1766.34	2262.27	1675.43	1340.78	1000.24	2263.53	2139.62	2077.35	1870.59	1449.43	1845.57	1584.03	1855.95	2095.26	1310.63	1795.47	1746.47	2070.94	2643.48	3261.22	1628.01	1362.6	2656.37	2061.47	1705.76	1728.15	1307.59	1334.07	1765.92		1625.17	1959.51	1268.93	1557.79	1184.44	1888.7
DUS2	983.362	1478.14	564.665	1491.18	1261.97	1361.72	1198.86	1400.64	1131.64		1063.99		1386.68	1396.87	914.579	1399.05	778.454	1593.25	1387.18	1833.22	1312.94	1116.56	1673.5	1302.96	1416.74	1118.44	1498.99	1750.44	1218.78	2056.48	1719.21	1121.57	1085.92	1025.62	1581.66	1128.29
DUSP23	1193.11	1424.24	1500.3	1774.53	1377.52	1801.69	1022.27	822.736	1324.64		1072.02	930.36	1159.59	948.799	842.365		972.799	822.354	1001.81	657.009	1181.43	1460.18	1275.87	1622.6	699.812	1259.57	983.519	857.122	1142.91	2385.16	1113.67	1094.35	1116.11	1248.63	1823.2	636.871
DUSP3	666.487						1289.68	421.194	573.391		891.469	395.255	1061.05	708.19	1462.42		803.527	590.969	381.27				616.577				483.749				1008.77	734.158		754.473		796.862
DUT	8330.8	5104.1	8510.97	4702.28	10356	4019.33	11095.7	7462.5	5993.93	4039.86	8749.62	9754.89	9652.79	8400.35	10198.5	9811.85	10327.3	7582.62	7763.69	6905.59	7790.5	5179.04	7541.47	6106.75	8444.65	6821.28	7449.76	2709.4	6821.56	3060.98	8853.57	9785.46	6256.18	7561.08	3201.27	8585.12
DYM	1109.82	1309.17	546.994	1048.9		753.139	823.7	939.327	801.943		599.949		553.823	966.092	928.849		393.428	850.105	1326.61		774.467	725.06	589.355		972.17	854.457			1351.8		1325.68	812.169	1168.86	701.198	1027.87	612.942
DYNC1H1	17837.3	18100.1	13853.7	17163.4	12705.3	15210.9	17310.7	17248.2	18363.5	13598.5	17221.3	13654.3	16469.9	18592.4	16277.1	12511.7	16797.4	17306.9	18821	16132.4	18708.4	17916	18969.5	14866.5	17194.2	18900.2	18888.7	16610.3	18337	12625.9	18398.7	17309.4	18510.6	19272.6	17920.4	18062.4
DYNC1I2	1916.26	1642.81	1844.42	1986.62	1918.03	1759.66	1529.53	1460.4	1983.47	1771.41	2009.83	1680.15	1949.15	2303.44	1424.64	1568.08	1717.08	1680.77	2595.75	724.452	1897.2	1995.36	1916.54	1750.3	1670.25	1890.3	1979.14	2586.11	1878.08	1782.12	1313.07	2005.19	2220.5	1712.18	1343.95	2572.03
DYNC1LI1	3594.19	3998.81	4681.15	4280.5	5523.75	3006.81	4476.57	4876.53	5242.03	3700.08	3870.22	4435.83	3583.27	3624.88	4396.17	4765.16	5003.93	4153.58	4882.32	6583.61	4462.68	4138.86	4317.11	4532.49	4292.3	4826.04	4191.47	3712.19	5463.41	6223.69	4242.74	3806.15	3848.09	4697.58	3385.35	3688.07
DYNC1LI2	2543.74	2742.76	2618.56	2970.78	3227	3323.34	2660.38	2733.12	3828.26		3278.84	3008.76	2724.33	2848.55	3613.82	3081.96	3027.67	2655.21	2797.96	2914.51	1966.74	2819.86	3152.25	3266.57	2692.81	3350.45	2554.49	2753.16	2741.59	2959.25	3113.58	3130.39	2057.22	2443.19	2122.14	3363.99
DYNLRB1	603.195	627.129	1055.77		702.527		543.167		214.976				894.892	1175.62	403.129	308.093					454.425	437.818	658.026	647.462	442.274			261.521	413.524	850.668	1009.88	225.761	1259.35	510.666		351.815
DYNLT1	763.094	1322.97		728.78		779.235	891.23	1069.51	674.409		1203.57			1563.84			1764.21	1934.85	2010.57	945.828	1040.86	1349.27	907.135		741.595	1259.65	1155.52	1521.25	944.161		1246.04	649.711	1246.63	1432.57	785.607	703.459
EARS2	3402.79	4532.88	3566.06	3727.34	3318.22	2620.13	3963.66	2954.81	2868.86	3575.66	2722.22	4332.5	3733.94	4176.3	5072.07	3322.81	4652.97	4245.44	4662.33	6017.58	3732.93	3401.97	3315.83	4616.56	3143.02	3594.72	3591.17	4007.29	2615.95		4105.21	3535.81	4002.41	3448.11	2659.67	3353.05
ECH1	14032.9	15422.6	11292.3	17397.3	13044.1	14199.4	14870.1	14376.7	15096.9	17503.8	14942.8	14970.4	14079.5	15101.6	15477.2	12713.4	13329.3	13525.6	13703.5	11650.8	14301.1	15287.9	15358	17648.8	14742.7	15190.9	14521.6	15205.9	14268.8	17917	14262.9	11749.1	15174.7	13628.7	14256.1	13797.3
ECHS1	13414.4	13349.7	9481.95	13727.4	11431.4	13562.2	14945.3	13783.1	14576.1	12147.7	11473.5	11888.7	12740.3	10153.5	12279	9606.28	11890.9	11466.4	12116.2	9515.86	13266.3	15264.6	12204.4	13567.4	10873.3	13142.5	10799.6	14941.6	11644	5430.76	13714.9	14159.6	12723.9	13024.2	13681.9	11060.6
ECI1	7042.61	6620.76	5075.25	6894.08	7706.4	7991.56	7872.26	8052.87	6307.56	6050.05	6403.83	6335.11	7269.08	6933.57	7118.57	8828.21	6504.25	7201.21	6705.21	8357.22	5294.31	6142	7289.59	8177.39	7136.96	7807.2	6335.19	6892.27	6619.81	8986.52	6222.83	7621.37	6676.57	7207.16	7507.72	6488.23
ECI2	901.578	1383.03						811.476	581.413				782.95		876.266				756.459		875.401		631.016								893.942	512.41	756.329
ECPAS	3775.1	3688.7	3143.51	2394.35	2893.08	3523.01	4180.9	3381.46	3900.5	1788.25	3662.1	2852.48	3785.91	3785.5	3396.06	2236.87	4205.65	4342.45	4591.8	3406.98	3991.55	3593.75	3715.08	2931.85	3999.83	3976.1	4267.68	4117.16	4538.04	3241.37	4393.45	4121.84	3977.85	3991.83	3348.39	3315.89
ECSIT	694.794	614.207	816.884	978.411	1167.42		658.596	1111.88			586.734	870.64	726.519			1131	368.513	741.902	817.59		664.429	445.166	603.965	601.315	1020.27	718.677	324.673	569.965	922.219		459.184		856.904	372.694		424.228
EDC4	7142.52	5402.2	5297.02	7533.99	6178.69	7111.93	6780.39	6101.15	6317.73	4943.89	6427.41	5312.56	5487.04	6739.74	6203.16	3072.25	5335.84	6094.72	6439.91	5426.16	6716.55	5563.65	6394.89	4650.61	4668.01	6758.93	7777.5	6939.95	6529.84	7764.83	5895.66	6260.17	5864.02	6574.04	6586.14	6000
EED	917.82	905.972		977.445	390.84	1044.56	1176.02	938.878					670.974	979.795	481.713		749.059	1009.91	809.466		889.59		1065.97	268.843	743.92	731.589	1059.44	898.499	1029.02			654.453	774.515	1255.1	783.935	738.689
EEF1A2	594.943	847.882	11736.9	2826.16	966.199		1519.24	1637.13	687.134	1150.69	951.115	1382.46	4125.55	4802.08	1445.97	1562.16	1950.07	1229.75	4166.92	1027.88	1633.41	986.996	1026.33	1496.74	3381.74	1277.98	3730.89	1869.29	1889.51		592.517	647.931	643.698	805.988	2144.85	1094.22
EEF1B2	19289.1	21297.7	19180.7	27075.8	27942	20072.6	16951.9	17904	21496.8	17791.6	16000.7	24842.2	18129.2	19254.9	22520.8	29918.7	18288.3	17927.7	18266.7	26239.6	16784.1	20453.7	17724.6	25195.3	22889.7	20771.8	23567	22067.2	21752.5	42147.7	17278.8	11402.7	19487.9	18332.2	23041.5	19973.5
EEF1D	15198.3	10546.7	23399.3	12141.2	22769.5	10209.8	17808.7	12519.3	13295.3	11080.6	17687.5	25372	16023.4	12810.4	15787.8	17747.2	15624.6	13799.7	13060.5	15869.5	9925.13	8807.32	18318.3	12088.1	16564.6	13617.2	13676	8310.7	14352.4	9402.15	14156.2	11878.5	15640.2	14351.2	7380.19	13731
EEF1E1	1564.35	2055.33	1217.42	1179.89		2203.04	1639.11	1777.91	1588.38	1669.62	1909.03		2291.93	1326.6	2437.7	1580.02	2829.88	2121.49	2473.05	2168.09	2363.71	2748.07	1716.99	1097.64	1157.59	1499.33	2206.8	2056.67	2608.59		1869.95	2817.06	2915.21	2097.65	2213.21	2054.42
EEF1G	90954.3	98970.4	58195.7	94677.1	45933.9	69395.5	88265.8	73115	74622.8	68787.1	69713.4	47300.9	84194.1	85997.5	60752	45754.8	76135.8	81741.7	91600.5	48303	100275	92793.8	94696.4	78737.5	68601.3	72701.6	82217.6	95348.5	71129.1	47167.9	87093.2	80255.5	93718.8	78650.2	78284.4	78126.2
EEF2	134227	138216	109858	133620	100611	111647	136020	119006	116929	91243.2	117144	104802	139254	140471	121152	96869.1	130173	135777	135170	106691	153625	139566	147566	137336	131829	127893	137389	122534	118032	96504.4	141673	137468	146145	124911	137919	142929
EEF2K				1697.31									1523.11		1601.87	2248.7		1386.21		1999.69	1732.64		1311.64		1723.92	1469.82		1869.36			1572.42		2525.44		2391.1
EEFSEC	2093	2707.28	2234.32	2697.57	2597.79	2405.7	1620.6	2214.81	3180.03		3024.38	2396.7	1963.3	2729.49	2427.12	2212.07	2192.53	2921.84	2846.26	2180.21	2021.05	1986.31	2920.18	1786.79	2603.4	1747.54	2863.42	2257.31	2470.15	2644.85	1819.4	2377.22	2118.66	2242.67	2724.21	1561.06
EFCAB5					6336.42			8913.04			5704.88	6250.34				8839.23			8931.24		12271.6						9134.76		7057.98			8583.67
EFEMP1	1372.14	1193.68	1508.1	1330.86	1267.16	1289.25	1435.85	923.455	631.257	1373.12	1191.48	1350.19	1603.67	713.364	966.667	1203.53	767.039	682.924			1086.74	879.262	955.045	1233.3	1252.98	893.691	1296.71	1385.74	1416.22	1605.17	857.229	1043.35	703.886	1157.49	1334.11	1329.63
EFL1	1408.85	1330.62	151.524	1559	1551.5	1483.43	1277.21	1407.39	834.291		967.633	2268.27	1591.66	1862.42	1931.48	2169.12	1431.63	1666.29	1675.41	1771.21	1129.03	1560.92	1341.11	1264.31	1712	1317.82	1869.5	1698.35	960.4		1236.52	1658.76	1389.96	1238.59	1697.61	1391.44
EFTUD2	11263.6	10242.5	12097	12290.3	10726.4	9696.71	11294.2	11082.5	11191.6	9889.83	11692.6	9695.12	11406.7	10970.1	10765.8	8739.68	11234.1	9304.11	12042.2	10106.7	11451.3	11397.1	11581.6	11470.1	11492	12017.9	11148.2	11027.5	10653.5	10442.3	11478.4	10042.9	11176.3	10957	10894.9	11617.2
EHBP1L1	928.165			1594.65		1961.59	961.245	1229.84	2310.09	2054.89	2034.13	1267.38	1677.32	1707.78	2135.28	984.172	1762.84	1568.09	1257.61	1676.89	2414.33		1780.87	1639.04	1535.12	872.591	1657.03		1894.65		1121.03	865.415	1597.25	1518.89	993.422	1132.57
EHD1	1581.87	1724.39	1262.25	2683.66	1412.82	1606.79	1915.33	2059.04	2034.35	1787.99	2056.71	3912.08	1060.77	1953.87	2155.32	944.804	1901.06	1893.9	1506.08	1376.73	1312.42	1541.63	2007.76	1823.11	1163.06	1658.78	1676.6	2360.9	1842.56		2317.99	2385.88	2145.37	2421.99	1695.94	1331.94
EHD4	1938	2318.5	2168.91	1851	2443.97	2471.3	2279.73	2499.33	2516.08	2057.97	2536.59	2514.99	2508.68	2268.82	2241.66	3130.49	2099.33	2144.29	2014.8	2262.56	2557.63	2201.91	2337.93	1961.21	2508.92	2192.3	2351.26	1859.12	2320.94	2674.85	1711.63	2824.54	2070.96	2607.79	1977.66	2020.61
EIF2A	10188.5	8448.53	12960.1	8507.69	11917.6	10651.5	10092.9	9336.72	9693.54	10158.1	10481.9	9037.52	9699.05	9606.47	10809	7959.04	8916.12	7947.14	9477.89	8955.27	8235.27	7894.75	9825.24	9242.28	9868.93	9988.72	9279.18	7737.99	10720.7	5792.27	9052.4	7625.72	7702.49	9672.38	8024.64	9230.8
EIF2AK2	1722.93	1473.31	1078.3	1513.02	1403.2	1299.31	2338.58	1662.07	2226.83	999.522	1515.31	2302.58	1638.57	1785.57	1240.11	1924.8	1505.44	1634.28	1399.26	1875.17	1928.51	1840.74	1710.84	1562.44	1384.95	1947.66	1418.66	2074.7	2046.95	1561.76	1780.67	1424.16	1385.17	1898.91	1801.81	2031.53
EIF2B1	1195.77	1053.61	915.545	941.345	756.313	763.051	983.492	963.775	1218.92	726.16	1283.03	405.96	753.675	792.157	882.547	717.736	905.785	1038.74	684.322		787.204	844.926	726.389	890.353	596.153	1078.31	648.774	805.36	649.164	871.903	942.749	1137.35	670.08	1070.66	754.14	973.973
EIF2B3	3337.23	3091.17	2224.05	5276.59	2500.72	4356.91	2695.99	3815.84	2864.03	4499.95	3388.24	3566.06	3815.92	3929.44	3479.68	4756.04	3019.13	4373.17	2923.79	4090.19	3345.32	3303.21	3214.69	3231.17	4651.06	3822.29	3987.26	5219.96	3748.09	3041.04	3525.83	4235.84	3589.3	3227.29	5465.09	4383.88
EIF2B4	1277.1	1991	913.744	931.124	1136.16	922.49	1094.41	1243.68	1511.82	1118.09	935.597	928.502	1036.74	1070.25	1094.21	1595.51	1132.67	1038.93	1084.59	1155.97	1369.83	933.013	1373.1	1355.24		1585.85	819.023	649.298	904.71	840.773	850.872	913.532	839.189	1032.39	1617.2	1092.88
EIF2B5	3922.18	5158.99	2736.35	3151.22	2628.19	3370.55	4142.07	4091.57	3030.14	3617.37	2880.6	3383.34	3673.91	4752.84	3188.4	3167.41	4010.66	4136.64	4222.9	2588.88	4666.09	4853.64	4006.61	3591.34	3473.57	3940.14	3709.02	4777.57	3911.21	3226.38	3396.33	4325.41	4371.42	3763.1	4579.32	4622.68
EIF2D	673.581	852.339	973.663	966.921	1535.35		737.771	713.931	863.405		648.725	1149.57	914.203	818.819	331.467	1460.27	898.157	720.362	569.107		798.319	733.354	778.239	924.521	1271.08	955.311	634.338		735.907		732.984	1220.09	960.911	546.545	989.517	811.792
EIF2S1	23642.3	25398.4	17840.1	24988.3	18152.2	23143.8	26918.9	23558.8	31598.4	23833.3	24561.8	20656.3	24024.9	23377.2	22951.4	20151.4	23936.2	20672.3	25411.7	21788.7	21788.6	24892.9	21730.4	22600.4	21482.5	25017.3	21598	24710.3	22144.6	23514.6	25310.7	23288.1	24018.6	27420	24191.5	23784.1
EIF2S2	10776.9	8799.22	9712.29	7917.13	10455.9	12907.8	12160.4	10831.1	11835.9	7166.83	10267.2	9493.24	8838.96	8844.5	13125.1	11377.4	9829.92	8607.73	8409.08	11961.6	8562.41	8307.55	7985.21	6970.86	10405.4	11156.4	10435.2	4416.78	9831.17	4488.87	9534.23	10728.4	9287.18	9021.63	7835.41	8017.26
EIF2S3	8661.59	7451.87	7244.06	6868.32	6041.85	5815.17	8835.14	6266.24	6892.75	5657.94	8377.02	5965.99	7576.32	7989.23	9124.24	7076.14	7836.13	6739.34	8325.77	5909.8	7049.55	6836.34	9313.57	7438.86	8944.96	8141.4	8789.71	8363.43	7095.58	6806.4	7146.89	5706.21	6749.37	7507.95	8416.99	7497.81
EIF3A	13443.4	12623.9	13149.6	12795	10730.5	11944.4	11723.3	11712.9	10719.1	7522.74	11565.5	8740.83	12288	10285.5	11175	10171.4	11059.7	10890.6	11212.1	8483.16	15122	12668.6	14524.4	11464.5	9838.16	10378.1	9519.69	10210.5	10604.4	7301.35	11443	11778.8	9928.66	11531.8	11180	11431.6
EIF3B	41801.3	42249.6	21343	36628	22046.6	41360.7	41058.5	41838.8	37520.9	41485.8	34999.5	26231.6	35526	37556.2	33241.5	20678.3	40499	38200	37658.1	22530.1	37670.1	43854.7	29608.2	26875.4	28908	40681.9	32398.1	46503.1	34112.3	17027	40449.7	43055.9	41142.1	38860.9	36118.9	35437.2
EIF3C	213.037	330.798			442.142		153.046		51.2708														178.399		164.721						317.092
EIF3D	11410.1	12211.5	10646.7	10596.9	8455.31	10270.1	13074.3	9283.91	11224.7	9163.3	11232	10317.8	11098.8	10390.3	10408.4	7053.16	9061.33	9619.71	10839.9	7892.98	10948.2	11858	13051.7	10859.7	9027.38	10525	10281.1	9937.54	10603.4	9861.72	10876.5	9283.36	10707	11190.7	10087.9	11811.6
EIF3E	7169.37	6072.09	7126.01	4082.12	7889.42	5167.88	6702.18	5675.57	6173.87	3868.69	7010.35	8365.88	8505.53	4303.33	6721.77	6364.7	7373.41	7753.74	7040.13	6091.63	6313.46	6749.54	6365.7	5944.8	6290.23	5490.24	5681.32	4752.36	6775.25	6276.92	7736	8173.7	6314.43	6114.2	4864.47	7670.87
EIF3F	11019.2	9932.23	5711.07	9406.29	6705.97	10237.8	11325.7	10712.6	10952.4	8262.88	10688.9	5693.44	9360.95	8813.05	8834.1	4901.95	9467.77	9700.53	9941.46	5142.83	11167.2	11759.1	10011.5	7620.9	7694.83	11793.7	9112.65	12319.4	10092.1	4448.21	9014.33	9693.37	10608.4	10603.2	9960.17	9244.56
EIF3G	2404.72	2663.82	3146.68	1974.75	1849.51	1486.25	2382.47	1602.06	2108.23	3210.53	2048.3	1863.93	2279.65	1419.72	2205.16	1481.93	1476.43	2321.51	1489.91	1246.4	2457.11	2133.18	2217.58	2649.11	2018.52	2244.75	1158.05	2244.6	2020.95	2654.93	2325.98	2275.74	2329.98	2433.33	2102.22	2190.42
EIF3H	20814.8	23717.9	30074.8	26398.4	28441.1	20315.6	22947.2	23238	28453	27450.1	26755	24965.7	26394.2	30239.5	30984.5	25739.2	23690.5	24393.6	27098.1	24494.4	26490.8	22623.4	28752	29468.2	26942.2	24071.6	29029.6	25099.6	29642.6	18105.8	22848.7	24865.1	25673	23707.5	25809.4	28252.9
EIF3I	16603.3	15948.8	17701.3	20721.4	16252.5	16756.1	16195.2	16319.6	14791.2	17568.3	16237.3	17718.8	17740.5	20287.8	17019.8	16174.8	17036.3	18696.4	17852	20164.4	18406.6	18233.2	18027.3	17678.6	18039.8	16134.1	18645.3	21063.7	17817	13191.9	15486.3	15468.8	17309.7	16653.5	19052.5	19156.2
EIF3K	1366.76	1106.97	1201.93			1389.53	1407.21	1695.79	3646.11	1216.79	1785.93	750.137	1239.99	664.243	907.837		1263.86	1112.52	1082.35	791.096	1040.12	572.122	1258.23	1508.62	761.753	1350.39			1052.55		1589.24	1205.69	1490.03	1070.25	676.084
EIF3L	5714.05	4753.54	3026.21	3373.65	3918.09	4037.57	5562.2	4697.55	4914.06	3518.96	6073.2	4039.16	4887.44	3767.98	5067.96	2658.15	4862.88	4607.57	5521.34	3631.31	5333.46	4651.24	4652.31	3552.64	4349.91	4687.17	5004.95	4173.77	5103.34	3135.52	6224.76	5933.85	4745.01	5569.25	3686.65	5254.5
EIF3M	6268.93	4931.05	2305.97	3671.09	2226.79	6616.41	6061.08	6002.46	6003.48	5508.42	6051.08	2467.85	5318.78	4667.13	4723.58	3212.51	7141.84	5506.71	5589.48	1416.54	5547.81	5689.94	4545.99	3709.9	3856.97	7288.11	5193.87	5319.18	4157.52	1982.07	5192.44	5618.98	5618.28	5008.35	5003.67	4874.1
EIF4A1	43624.6	44187.1	24487.9	36319.2	18727.2	35168.6	44087.1	42678.3	38461.5	37847.5	32370.5	17137.1	36945	36261.7	25709.4	14069.7	36029.5	40037.1	41672	16611.6	49404.7	52777.4	40347.7	37431.6	28792.3	45438.6	37601.3	53556.7	26440	13124.3	43846.9	36212.1	43028	44826.2	34392.8	45230.6
EIF4A2	1341.32	1335.29	812.96	2060.79	708.182	1533.02	1440.97	1468.96	1071.88	2601.44	1298.4	997.418	1850.9	1448.29	1422.02	1313.54	1217.43	1384.98	1421.28		1891.97	2053.18	2095.5	2444.18	2888.68	1423.41	1541.91		671.127		1587.12	1474.53	1421.76	1201.32	1807.9	1117.82
EIF4A3	10409.6	11178.1	6939.72	8613.86	5967.57	10827.1	11441.3	10414.7	9208.02	12611.3	10283.9	5356.19	9836.29	9043.13	9754.09	4562.19	10169	9916.44	9642.35	4735.84	9982.16	12293.4	9357.56	7418.26	6475.97	11034.7	9369.74	11187.4	9673.33	7125.55	11184.7	9400.1	11155.8	10957.9	9988.63	9105.96
EIF4E	4702.46	6175.27	2742.14	6782.27	3052.1	4146.18	5652.75	5935.49	3925.06	2231.72	3878.62	2800.79	4680.99	4878.58	2647.61	3113.47	5930.53	5505.89	6473.83	4287.86	6817.53	5050.12	5443.32	9205.13	5027.22	5265.22	5577.55	6567.78	2344.23	1295.36	5638.97	7142.57	5644.68	3236.14	6545.02	5185.76
EIF4E2	889.303	759.168		627.194		552.364	458.935	761.978	473.19		571.314	1196.6	871.451	787.196			314.733	679.319	258.419		638.771	907.714	1133.08	417.201	1219.02		653.014	758.631			979.56	405.635	565.676	814.399		677.825
EIF4G1	12176.8	13828	10654.4	8866.66	9367.07	13793	11819.2	12131.2	12581.5	9511.75	12409.8	9009.54	10742.9	9705.01	10430.1	9459.09	12175.8	9667.24	12379.9	12548.7	12130.9	12016.2	10323	10328.2	9837.17	10767.3	8578.25	10804.6	10860	9577.01	13536.4	12907.1	10571.2	11845.8	10309.2	12027.9
EIF4G2	2216.24	1484.37	6486.33	1881.45	3084.5	2411.26	2764.26	1928.59	2807.04	1402.37	3108.12	3491.61	2315.34		2784.84	2677.16	2737.08	1419.66	3590.56	2754.51	3206.35	3158.12	2828.34	4257.44	2318.24	2712.28	1754.35	1265.71	1761.86		2675.78	2034.05	1965.52	2202.83	1917.42	2439.2
EIF4H	1221.9		3569.86		793.093		1584.9				680.268	919.125	1112.49		761.599		650.029				1212.38		1209.65	593.255								716.226		730.637		916.064
EIF5B	3412.78	2748.74	4681.93	3589.45	2903.46	2705.38	3110.11	2921.24	2802.69	2349.22	2892.14	3104.12	3147.27	3057.06	2433.51	1638.12	3007.54	3138.5	2784.06	2199.88	3801.79	3146.2	3771.29	3083.07	3193.84	2830.61	2850.4	2819.49	3261.64	5092.42	3463.97	2807.73	3534.5	3093.52	3393.22	2951.39
EIF6	6132.55	3828.48	5899.84	6413.81	6178.21	5544.76	6636.31	5045.41	7109.9	7086.2	5130.11	7808.58	6690.88	5090.08	7040.99	5144.77	7626.78	6056.18	7660.9	9416.15	6978.45	6257.28	4742.94	5997.09	4659.28	4887.73	5491.13	5341.55	3918.91	5961.88	6528.64	4018.38	5569.08	6545.7	3803.77	4770.43
EIPR1					1540.75	888.979	1189.31	1184.07									1247.05																879.769			701.951
ELAC2	2606.76	2430.49	1959.68	2070.11	2228	2354.63	2791.18	1930.71	2205.27	1614.96	2369.33	2301.83	2527.36	2271.89	2222.25	1556.98	2454.08	2180.22	2188.07	2426.64	2832.39	2239.97	2541.1	2320.82	2577.63	2286.05	2297.68	1596.36	2683.24	2702.02	2256.4	2064.5	2030.52	2281.15	1967.23	2219.31
ELAVL1	9115.45	10348.6	6027.11	9146.48	7233.05	8502.96	9372.69	8934.62	8382.31	7690.41	8443.28	5306.21	9502	11453.6	7699.27	6726.38	10105.3	9031.39	8580.88	8545.7	9662.44	10085.1	9091.22	9611.24	10089.8	9238.63	9593.41	10677.1	8940.74	4845.5	7215.05	8810.35	9223.38	7988.17	9863.13	8960.71
ELMOD2	1778.6	1681.34		1448.08	929.212	1722.53	1142.09	1576.16	1346.43		926.859	567.129	1195.79	1936.96	1242.92		1385.2	1664.69	1053.02	674.041	1586.34	1420.14	1348.13	1348.73	868.7	1300.06	1240.62	2266.56	2631.63	778.31	1771.01	1769.51	1449.47	1464.92	555.93	1171.21
ELOB	4217.88	3029.79	2782.33	2619.43	3446.13	2819	4181.32	3573.46	4895.93	2109.94	3611.94	2387.23	4130.34	3269.22	3433.03	2567.44	4066.56	4176.62	3762.73	3423.32	2992.88	3625.64	2857.53	3560.93	3324.16	3655.29	2544.77	3104.32	3496.23	909.797	4352.59	3796.12	3968.63	3242.39	3214.45	3479.96
ELOC	4190.77	3996.19	3032.55	5061.46	3917.84	4333.33	4074.62	4420.74	3660.18	4295.43	4526.92	4236.62	4318	3659.78	3645.05	4052.86	4094.73	4566.26	5259.65	4455.14	4300.71	4810.95	4799.02	4890.69	4139.64	5070.23	4279.84	4447.43	4676.84	3861.56	3717.66	4516.51	5058.84	3672.16	4591	5400.88
ELOVL5	1807.68	1474.3	690.818	1199		1373.87	2358.4	1279.08	2504.99	3218.44	1433.8		1102.39	968.067			1509.55	1216.81	608.416		1526.57	1694.34	815.91	669.496		2643.08	1122.61	780.199			2068.03	1844.88	2724.46	2138.45	1545.81	1490.84
ELP1	1776.88	1988.91	1331.91	2531.65	1873.03	1888.59	1360.52	1603.91	1618.53	2691.48	1737.1	3507.65	1706.16	2106.64	1925.31	1203.94	1994.61	1969.59	1260.99	1695.37	2186.95	1549.64	2000.46	1781.86	1771.21	1864.37	1819.02	2408	1497.5	1783.17	1692.79	2003.06	2027.54	1579.15	2103.49	1927.39
ELP2	2439.88	3309.54	1822.7	3337.13	1308.6	2520.78	3337.14	2226.33	2509.15		3466.84		3248.07	2919.61	2889.28	1945.5	3086.63	3619.24	2836.95	3116.44	3297.39	2423.64	2532.53	2787.19	2663.35	2743.57	3323.04	2659.27	2830.73	1942.9	2902.12	2946.36	3526.18	2220.91	2340.17	1930.89
ELP3	2108.17	1698.89	1656.97	2507.62	1170.02	1789.81	1866.13	2085.85	1935.8	2684.77	1757.05		3050.9	2644.23	1704.66	2359.23	2497.24	1781.7	2705.73	2717.48	1916.28	1708.33	1951.02	1752.67	2586.75	2065.83	2159.79	1540.73	1917.9	1439.31	2047.02	1833.91	1789.21	1803.69	1815.58	2332.79
EMC1	3604.31	3624.83	5014.4	2854.45	3001.84	3655.64	4814.96	3783.46	5215.93	4480.32	3572.32	2812.62	3645.2	3727.22	3808.59	2352.48	3378.07	3992.56	3360.04	2131.05	3352.73	3648.95	3178.15	2391.87	2553.85	3959.1	4010.43	4277.04	2619.1	1773.2	4658.06	3978.95	3727.55	4451.84	3716.04	4400.99
EMC2	2921.41		2861.96	3104.76	2826.33	1712.03	3009.13	1417.99	2008.35		2847.76	2029.55	2595.19	1969.95	2892.74	2641.26	2885.3	2670.36	2167.25	2597.16	2427.38	1729.99	2774.09	1880.71	1747.86	2709.35	2389.38	2036.59	3019.85		2753.2	2171.03	2126.28	2993.9	2603.77	2187.99
EMC3	1415.71	1015.52	735.831	1023.01	739.437	1819.06	1697.53	1324.4	1606.53	1651.41	1926.24	602.46	1663.67	1096.1	1354.18	753.693	1767.92	1203.63	1696.41	1042.91	2032.09	1325.52	1301.91	1036.06	1061.55	1504.35	1052.24	1267.01	1461.55		1747.41	1805.79	1156.74	1563.71	1468.27	919.656
EMD	2212.94	2753.04	2419.73	3474.99	2274.3	2441.06	2216.14	1785.44	2427.01	957.451	2625.88	1488.4	2364.3	1777.74	1708.61	1873.39	1938.66	2416.73	3660.38	3327.22	2517.59	3044.7	3638.53	3791.78	2786.33	2903.64	1259.24	3762.32	2258.08	4886.28	2410.51	3563.3	1255.06	2702.74	2990.75	1329.45
EMG1	5515.2	5499.98	3490.61	5074.96	4223.96	4560.58	5150.94	5932.31	5431.67	2892.36	5177.64	2887.74	4521.87	5553.24	4996.73	3846.36	5808.32	5857.18	5364.6	3883.78	5573.85	4733.01	5205.54	2924.3	4765.15	5178.7	5620.41	4744.19	5375.85	2530.04	4374.37	4095.71	3643.26	4329.53	4456.59	5603.14
EML2	2580.85	1894.81	1380.8	2031.5	1261.36	1941.07	1759.27	2030.17	2021.72	1602.22	2025.19	3318.92	1625.82	1105.6	1869.74	1535.68	1711.34	2067.11	1536.08	964.576	2692.9	1791.2	1994.69	1491.16	1459.75	2066.89	1883.45	1998.66	2490.43	952.404	2476.67	2249.59	1839.92	1724.14	1664.79	2003.8
EML3	1570.72	1656.97	1172.79	1085.27	2030.52	1054.72	1078.23	1584.8	1347.64	2303.34	1728.9	1219.1	1803.98	1484.36	986.66	1292.16	1231.49	1646.24	1334.83	1733.22	1266.58	2078.82	1173.4	1320.95	1384.19	1637.07	1496.29	863.407	1252.16		1750.31	856.365	1284.34	1277.12	1687.91	1496.34
EML4	2524.29	2509.71	2205.29	2483.08	1522.28	2782.01	2222.8	2578.51	2956.44	3073.64	2653.59	2370.42	2461.87	1802.89	2851.74	2189.87	2308.17	2188.75	2079.57	1724.2	2269.69	2249.55	1727.85	1943.37	1674.79	2909.1	2039.08	2408.79	2173.01	3683.7	2048.62	2218.94	2355.2	2602.44	2354.41	2195.99
EMSY	813.275	359.455	558.173		590.325	515.299	158.755		706.176					1077.74		301.132	554.366		459.98		633.82	483.158	1147.24	736.982		890.15	745.574		518.936		708.999	434.167		477.638	1002.49	651.401
ENDOD1	583.782				661.131		704.027	874.88	1351.44		951.259	1594.67	664.916	459.957	1134.33	1372.51	400.82	858.603		535.111	278.986			373.534	532.62	425.686	434.13					579.716		631.596	469.088	603.195
ENO1	77768.4	91636.6	72736.7	119963	87698.6	100177	92330.1	113290	86373.6	107791	81899.8	82900.8	86523.2	77041.3	82851.6	81265.7	85535.1	90635.5	90051.1	81721.7	97810.6	95890.9	96610.7	102535	86429.4	106159	79425.5	126220	87077.8	87810.2	79422.1	93309.5	99802.1	77198.7	83758.6	74967.1
ENO3	727.453	678.651	804.928	936.555	831.5	1371.01	697.757	633.575	610.649	934.333	709.248	788.5	596.714	930.738	567.671	1149.68	830.003	556.298	830.387	505.73	1055.09	924.772	673.077	504.072	966.474	561.525	316.588	555.879	907.267	1107.48		754.3		494.082	1012.89	633.172
ENOPH1	575.623				451.114		926.52	601.146	979.715				444.965		462.357		1107.41	1104.97	607.31		590.371	437.152	441.463			390.697							526.247	566.794		775.495
EP400			421.97				235.856			248.183			173.907						107.375												157.03
EPB41	480.195		400.429	584.572	433.706	292.473	248.126	443.376	73.0404		213.509	406.838	321.292		614.619		296.292		385.37	166.651		401.088	424.137	459.17	343.929	388.815	441.171	572.243	249.986		279.366	772.328		436.033	502.821	297.302
EPB41L1	929.852	1017.36	1493.43	1908.17	743.099	920.007	894.223	897.427	176.337		686.744	488.285	1267.7	1236.98	252.496		955.816	1391.16	1737.02	1122.06	1456.8	1159.56	1491.2	1219.65	1451.29	1401.17	1067.92	1477.24	1029.33		1248.46	743.702	894.743	1443.13	1373.46	1629.35
EPB41L5	838.642	852.714	1035.65	1631.8	1495.48	847.106	1137.32	1156.72	628.762	785.556	1193	727.603	964.143	1022.9	853.35	1402.81	946.141	961.849	1599.29	1797.7	602.165	707.099	877.673	1276.48	1185.3	860.531	1503.61	976.955			650.508	1013.2	1396.28	1034.13	815.811	877.191
EPCAM	9526.55	6452.68	10195.1	7361.73	6952.99	5051.56	8923.6	9599.12	6261.76	4520.44	8832.83	7283.57	8107.58	8008.59	7684.06	8011.33	6764.59	7118.65	8287.24	10933.6	7189.19	5834.34	8565.56	9135.86	6616.38	8702.75	8608.64	5613.21	8869.69	10685.2	9048.82	7137.89	9007.41	8172.6	11223.6	7669.47
EPHB3	2764.56	3092.45	3299.51	2679.27	2707.99	3361.3	2880.8	2948.39	3765.45	3620.51	3604.6	2466.37	3322.83	3766.19	3366.77	2120.08	3005.22	3968.87	3162.11	2190.75	2830.23	2719.35	2539.53	3425.56	3313.51	2884.43	3236.12	2254.16	3085.95	1211.15	2269.42	3112.33	2458.93	2822.95	3635.53	3303.19
EPHB4	3147.15	3896.05	3214.95	3911.77	3996.23	4206.73	3638.61	3692.19	3565.65	3601.5	4229.68	4848.44	3630.02	3831.56	3668.56	4130.3	3648.57	2739.33	3167.67	5434.48	3218.02	3609.02	3585.75	3502.26	3996.35	4076.35	4006.87	3307.3	2833.39	3939.84	3494.25	3700.5	3915.91	3592.24	3939.97	3733.24
EPHX1	1687.53	2156.59	2030.51	2620.4	1579.18	2663.35	2373.22	2349.64	1845.94	1948.47	1634.8	1919.93	2084.04	2021.56	1821.96	1435.39	2172.93	1929.41	2219.44	1382.24	2524.74	1866.32	2535.56	1344.36	1813.66	2214.81	2393.05	2589.17	1234.7	1465.71	1368.07	1856.93	2026.18	1133.54	2331.59	1699.37
EPM2AIP1	2069.82	1680.3	1582.28	1300.11	1851.31	1547.86	2020.25	1983.15	1875.33	2417.35	1529.41	1098.13	1610.64	1412.06	1778.98	1806.09	1321.37	1384.21	950.513	1887.67	1102.63	1361.75	1634.83	1612.91	1500.08	2228.04	1105.09	2295.89	1750.14	1908.77	1720.39	1319.41	1709.44	1517.08	1419.79	1456.81
EPPK1	6699.01	6920.89	6956.84	5915.27	6853.88	5845.34	6049.97	6102.66	6821.95	5865.2	6111.62	6494.43	5731.41	5781.09	5757.31	6326.15	5233.46	5455.72	6598.52	6545.9	6752.72	6118.71	7112.7	7649.34	7023.86	6198.64	6300.19	5696.06	6351.35	6124.92	6341.31	5995.45	7147.92	5993.73	5779.54	5574.24
EPRS1	18377.2	17225.5	16824.5	17937.6	15653	15558.7	17565.8	18060.1	17235.7	16373.1	16968.4	15839.5	17827.3	18549.4	17075.4	16352.8	17892.9	16977.5	18597.7	17152.3	18883.2	19124.9	18735.1	16985.1	18070.9	17431.8	18230.1	17468.7	18299.3	15985.4	18052.5	18336.4	17080.2	17095.3	17439.7	17727.5
ERAL1	2039.38	1940.82	2846.71	2350.48	2507.73	2170.25	2039.49	1893.12	2152.47	2417.97	2607.4	2274.57	2151.97	2384.95	2330.89	2457.57	2090.11	2018.88	2676.94	2270.64	2458.32	2087.17	2424.64	2679.52	3509.27	2352.56	2252.69	2834.03	2450.23	3185.84	2094.71	2366.85	2181.04	2555.18	2208.65	2702.2
ERAP1	1379.44	990.426	1973.83	888.129	1037.16	589.579	673.33	759.703	897.107	1563.68	2117.22	1108.34	977.014	760.962	847.338	579.493	853.347	741.261	1258.73		685.862				1089.1	869.151	1128.33		1524.5			659.357		1523.77	439.851	2093.95
ERCC2	841.092	869.344	907.184	1174.45		990.123	1031.46	2137.98	465.617		781.431		574.494	1042.62	806.623		655.8	846.71	950.668		1010.21	922.603	998.654	1261.29	1428.35	900.51	1103.85	736.866			1268.22	1062.92	964.687	934.95	642.415	917.566
ERGIC1	2242.51	2251.65	1191.25	2301.45	2078.75	2284.18	3088.39	2048.31	2560.91	4244.58	2564.8	1698.59	3150.1	3118.13	1999.33	1504.79	3078.76	3188.54	2558.6		2597.2	3336.11	2488.61	1605.05	2362.67	2542.81	3050.41	2159.18	2820.45		2632.08	2033.79	2516.85	1437.06	2787.78	3159.23
ERGIC2	3492.92	2297.88		1975.44	1102.15	2885.57	2618.23	2984.99	2412.51		2171.13		3280.16	3462.77	3399.83		2675.43	3270.44	2789.82	2544.58	2995.05	2251.33	1922.29	2036.13		2415.51	2325.55	2893	1725.64		3521.93	3130.21		2318.57	2936	2213.61
ERLEC1		610.925					288.459	1148.79	1566.28		1156.25	643.112	1400.4	1601.55	1400.56	810.94	1709.91	1677.83	788.599		490.297				745.902		1437.86					1159.28			1017.66
ERLIN1	2402.9	1851.51	2628.21	1511.58	2091.7	1398.28	2504.2	3033.38	2219.5			2119.86	1194.15	2410.87	2410.78		2857.72	2131.33	1473.51	1602.79	1632.89	3192.5	2151.87	2074.82	1630.33	3042.11	1631.28	2043.15		2008.95	1875.74	2156.89	2624.34	2562.3	2915.38	2631.63
ERLIN2	2416.94	2988.13	2059.27	3810.48	2048.84	3130.71	2806	1979.22	3145.15	1400.33	2591.16	1554.02	3353.09	2918.36	2772.68	2589.81	2191.19	2737.29	2313.15	2181.85	2441.48	3117.69	2911.72	2526.87	3020.06	2400.6	2286.61	2705.47	2809.99	1593.79	2873.28	2931.92	2158.07	2659.71	3759.76	2932.51
ERMP1	2743.66	2427.96	2702.69	2648.58	1573.83	2123.91	2797.99	2578.65	3081.79	2930.18	2140.41	2659.42	2730.61	2206.09	2155.98	2224.21	2668.35	2738.33	2945.48	2067.54	2595.6	2670.14	2314.89	3175.2	2562.9	2058.02	2495.88	1872.44	2826.43	4784.04	2522.74	2606.44	3288.12	3027.28	2032.27	2611.28
ERO1A	2167.06	3022.65	2556.01	1258.5	2657.63	3060.5	2617.79	2616.5	2264.86	954.29	2597.39	2577.73	3172.28	1728.7	2880.42	2008.91	2527.62	1785.59	2724.49	3219.21	1982.98	2530.58	1971.62	2219.34	1962.1	2310.49	1715.68	2110.28	2367.07	3834.09	2080.62	2311.69	1767.13	2544.26	2169.73	2062.23
ERP29	8518.16	2929.01	4337.81	4620.95	10168.9	4284.73	11348.4	9097.03	7520.67	1574.35	9648.99	11878.8	12269.6	7866.84	11088.3	13948.9	11313.3	8769.48	7301.44	12231.8	7488.86	2736.8	7403.4	4788.12	10882.9	6427.18	7493.98		7903.65	1698.31	9184.78	10099.4	6130.84	8081.08	3462.06	5761.05
ERP44	7130.21	3642.82	8563.71	4666.61	7503.51	4087.04	7437.63	4583.19	5822.61	3138.97	4973.55	7801.26	8094.9	6175.29	7447.59	8334.43	7540.56	6320.26	6109.24	7161.99	6578.05	4061.81	6500.43	6537.23	5999.17	3902.58	5403.75	2704.94	7112.7	3514.13	7104.18	7911.1	6928.8	5368.45	4183.08	6775.49
ESRP1	8848.94	9713.88	8050.04	9713.82	9637.59	10391.5	9235.09	9725.96	9353.56	6347.21	7945.38	10054.5	9627.27	10339	9255.01	12331.2	9529.64	9718.6	7140.88	10742.5	9720.83	9012.43	9601.01	11924.4	10569	10177	9229.56	8037.05	8984.47	8176.06	9572.13	9932.68	10586	9129.07	9932.68	8768.2
ESRP2	2479.42	2523.16	3780.68	1761.32	3973.08	2020.38	3304.97	2795.99	3612.58	1618.05	3478.32	3322.2	2581.27	2978.25	3544.42	1664.24	2394.73	2162.55	3412.8	2171.25	3403.46	2619.51	3730.44	3426.86	2747	3476.32	2120.28	3322.74	3710.99	3497.98	1998.5	2215.05	2413.27	2615.49	2079.73	2484.73
ESYT1	7613.09	7121.09	7277.27	6044.15	6582.16	6085.78	7566.3	6410.77	6158.82	5064.73	6676.51	5615.98	6479.77	6191.55	6505.7	6242.73	6219.04	5438.77	6941.46	5491.63	7176.58	6736.03	7521.66	7991.91	6949.2	6697.57	6185.49	7652.25	7368.98	7826.14	6737.54	5514.09	7102.69	6574.39	5490.39	6720.63
ESYT2	5040.87	4780.48	4393.71	4986.84	4689.24	4943.53	5025.2	4661.51	4749.91	4432.18	4760.91	4754.65	5504.99	5242.68	5254.73	4504.2	4163.23	4196.74	5372.01	3690	5393.02	4560.13	5234.38	4044.49	4176.26	5115.64	4268.28	4900.47	4472	3834.01	4469.4	5004.81	4807.02	4841.02	4793.06	4371.77
ETF1	11197.8	11786.6	4665.61	6216.96	5973.34	8834.52	10479.6	10757.4	13487.3	10051.7	9829.84	6477.69	8730.55	6700.55	8222.51	3761	12246.7	10103	9773.84	5277.35	9103.36	14252.8	6752.62	3746.79	7986.08	11268.5	8851.94	14117.8	9441.08	6161.87	11716.4	10677.4	9238.02	11810.8	11214.4	8559.15
ETFA	25562.4	23308.6	25095.4	24844.5	24506.4	27768	25303.8	27835.8	27099.6	25566.9	22185.7	22185.4	22991.6	25346.6	26181.7	22172.6	25479.4	22678	24513.7	23481.4	24886.5	24478.3	22801.4	26826.9	24162.3	27679	23050.1	24701.9	26786.8	24809.2	25007.5	24790	25068.1	23971.3	24220	23899.2
ETFB	7935.97	9196.87	11272.2	8643.28	10210.6	9803.08	8060.25	8582.28	7434.11	6876.13	7176.62	9861.06	7320.38	6261.53	10460.4	9370.69	8542.64	6086.61	8756.73	7276.88	8127.19	7673.34	8321.93	8325.8	8019.36	8060.94	6039.88	9529.02	6144.38	12730.1	7274.37	6822.73	7529.49	6760.35	8498.8	6791.01
ETHE1	1258.99	583.237	1974.27		2077.04	1164.25	1584.78	1010.44	789.102		593.82	931.262	761.779	938.903	1034.93	778.555	466.102	800.457	389.523	803.368	959.309	750.482	2118.52	1162.4	742.826	1095.78	279.523	819.019	758.409		1171.47	643.977	1161	816.631	950.522	1237.18
EXD2	1290.8	1230.79	1693.72	1040.37	1888.98	1276.33	1180.29	1293.68	1214.72			1835.06	731.672	901.273	1335.28	1760.06	1140.82	1088.64	995.983	1483.86	1169.32	747.714	1205.06	1681.74	908.268	1173.09	1022.32	1020.68	1019.81	1199.22	1165.63	1099.16		1257.39	892.19	1449.7
EXOC1	1321.85			1707.58	1049.06	1343.24	1367.45	1447.43	924.025		1008.45		1178.59		1310.04		917.596	1689.11				1071.35	867.171		1371.12	968.315	1174.71	1471.12	1050.08		1239.18	1471.62		1321.44	933.762	1246.66
EXOC2	1055.78	924.806		1124.67			1490.87	819.927			911.794		1253.33	926.925			939.836	1464.92	860.453		1030.52	1654.9	690.927	788.377	900.143	747.351	987.415	911.973			991.552	698.072	1194.78	1309.12		816.859
EXOC4	471.708	620.653	622.928	494.423	636.757	664.986	447.701	586.909	728.287		616.32	367.249	321.568	375.813	629.812		489.444	607.877	510.078		480.45	434.758	461.401	449.69	854.613	500.641	614.996	587.316	480.693		168.661	311.813		656.869		779.188
EXOSC1	2786.9	2074.12	3010.66	2339.86	2524.91	2217.28	2981.61	2339.22	2223.42	1946.29	3385.46	3465.45	3244.14	2839.12	3117.66	2686.17	2887.77	2578.74	2589.66	2518.71	2703.21	2582.99	2601.17	2761.97	3023.54	2914.36	2858.3	1552.69	3006.18	2635.47	2042.32	2072.61	2121.27	3004.53	2542.84	2816.08
EXOSC10	1877.42	2167.24	2099.65	2828.39	2299.81	1877.06	2029.57	1568.22	2311.19	1013.54	1766.64	1679.21	2129.99	2568.67	1752.63	2376.32	2464.15	2272.83	2337.04	2022.99	2874.93	2528.34	2666.72	2363.14	2126.16	2207.5	1942.92	2086.42	2178.99	3051.34	2603.21	2185.26	2393.87	1948.98	1655.43	2200.1
EXOSC2	3529.18	5631.98	4013.34	4340.34	2649.38	3806.62	3492.23	3085.93	3258.78	2976.77	3434.7	2480.32	4473.77	4490.49	2753.98	3316.76	3787.48	4644.2	3909.05	3640.21	5100.98	5303.77	4515.95	4958.02	4164.81	4575.3	4604.33	5450.73	3969.45	2291.27	3747.66	3287.36	4359.16	3993.15	4825.79	4433.4
EXOSC4	4608.47	6294.21	3691.15	4912.13	2653.16	4672.08	4495.54	4919.15	4262.32	4102.27	4935.02	4104.49	5311.23	4975.98	4852.89	2918.6	4433.82	4691.84	3772.78	3838.7	4741.69	4814.55	5587.57	4813.54	5403.46	4875.66	4072.31	5131.27	4680.91	6275.04	3903.99	4118.38	4599.99	4290.78	4013.63	4592.4
EXOSC7	4180.9	4443.82	4846.91	4335.11	4075.07	3027.07	3959.94	3600.64	5320.04	7406.87	7099.74	6801.85	5550.39	5240.1	4969.97	5309.19	3019.18	4253.11	3597.18	6613	4419.02	4912.35	3595.55	3518.71	4648.62	4042.06	4805.64	4616.66	5270.86	7772.45	3894.77	3495.14	4650.58	4137.64	4153.18	3482.88
EXOSC8	4779.25	4028.12	4803.05	4727.76	5130.04	3929.98	4576.28	5460.76	5006.85	5915.61	6039.98	6119.11	5839.01	5654.83	5334.85	5763.6	4180.43	4650.45	5160.22	5097.07	5399.27	3937.63	5514.2	4535.39	5144.36	5273.31	5628.05	3765.27	6882.11	3315	4281.58	5318.13	5456.2	5931.28	4941.32	6318.07
EXOSC9	3596.93	4007.67	1939.12	3270.05	3774.2	2871.78	3223.87	3717.57	3337.24	1997.22	2761.29	3096.22	5118.12	4444.96	3272.3	4957.4	3631.39	4791.08	2518.63	4236.81	3640.27	3523.99	4366.59	3553.48	3914.54	3398.3	4529.5	3484.39	3673.6	3549.36	3051.1	2892.37	3719.93	2881.75	4054.72	3956.43
EZR	9845.49	3771.88	8357.83	4230.53	9489.19	3609.9	10854.7	5778.56	7164.63	3559.81	10085.7	7755.65	8987.86	9180.16	8885.33	5121.8	9634.52	7641.58	8090.46	7498.62	7340.97	4144.07	7811.5	4737.77	7432.45	4971.36	8230.92	2066.31	7083.94	3713.01	9362.34	9746.02	9012.67	9567.43	3860.93	8836.19
FABP5	124.695					182.534																												337.073	1014.24
FADS1	1679.95	2132.16	1893.68	2138.04	2318.83	1809.2	2198.24	1809.28	2167.36	2441.28	1850.69		2515.81	2249	2680.22	2491.41	1531.35	2685.69	1795.22	2635.36	2114	1550.36	1719.56	1653.98	1909.12	1915.43	2293.57	2028.64	1678.2		2504.44	2241.05	1797.78	2132.39	2364.36	2145.12
FAF1	632.503	402.786	757.716	536.08	1189.6	682.003	703.622	944.772	647.433		709.546	1079.13	654.547		646.867	691.095	746.523	496.547	386.265		919.359	486.125	671.542	805.048	813.635	429.615	721.892	423.98	721.657		646.637	789.573	749.946	695.922	722.042	534.889
FAF2	1880.63	2185.48	1391.37	1903.85	1136.08	1292.32	1776.25	1380.92	1823.22	1666.72	1770.02	624.688	1840.61	1889.37	1052.35	1080.97	1075.58	1675.02	1637.19	1595.76	2334.97	2031.3	1686.52	1473.33	1218.97	2056.61	1663.93	2147.13	1125.17	965.351	1553.22	1515.1	1868.51	1632.17	1415.67	2256.65
FAH						5420.52		3452.92	6230.11		3357.47	2335	5016.07	2955.27	4970.94	1878.14	4277.06	4190.36	2657.98	4061.25		7420.11	3494.24			4413.89	5570.15									2446.39
FAHD1	4193.69	3169.98	3232.19	4374.64	4085.32	5231.14	3588.77	2349.28	3354.24	5082.34	4130.86	2614.62	3419.31	3267.47	3834.86	4014.27	2923.57	3471.02	2898.21	4204.63	2978.51	3189.26	2967.74	2734.67	2417.51	4424.12	2750.63	3540.52	3273.05	3022.02	2852.93	2925.04	2877.95	3711.03	3497.18	2747.92
FAHD2A	516.521	509.642	536.921			530.412	370.527	369.842	370.573				332.197		378.342				252.247		412.059	432.713		278.756			444.372				795.999	304.844	547.948
FAM102B	2312.02	1754	870.791	1704.7	1486.73	1255.28	2053.15	1637.56	1488.63	2696.34	1166.99	1062.79	1723	2012.34	1387.75	789.157	2034.12	2244.45	2348.35	1689.09	2421.84	1702.97	1773.7	1540.43	1449.56	2272.03	2450.93	2331.62	2549.35		1710.47	1849.73	1952.87	1974.47	2237.32	2826.57
FAM120A	4760.3	4106.3	3527.49	3546.3	3390.25	3965.67	3547.56	4094.59	4537.25	3292.35	3789.67	5690.56	4145.16	3190.97	4403.49	3941.7	4210.66	3893.17	4025.62	5132.99	3807.63	3667.39	3842.54	4394.53	3654.56	4273.5	3727.99	3809.03	4025.33	5361.95	3672.75	4073.85	3487.38	3606.48	4404.45	3595.04
FAM120C	758.24		810.426		634.736		328.632		317.795				181.688		292.278						355.58	394.918	735.442	621.213			229.81	459.281			794.659	337.039	373.721	330.787		509.542
FAM20B	2185.53	2189.4	2019.54	1915.79	1756.58	3192.12	2346.17	2157.48	2384.32	2832.27	1839.31		2186.74	2513.15	2604.88	2154.68	2089.23	1859.27	1461.14	2188.9	1783.41	2155.17	2146.1	2519.84	2613.81	2340.47	2373.46	1829.15	2216.72		1887.29	1977.25	2585.66	1290.39	2224.17	2117.01
FAM50A		456.211				522.721	447.905	427.884			405.423		724.6		442.346			318.134			457.941	368.073			475.194	472.631	511.186		424.765		499.745	194.055	1045.31	325.472	373.758	398.076
FAM83B	1649.29	1547.39	818.52	2172.61	859.381	1238.19	783.278	1752.75	1481.73	1479.24	1918.82	1792.25	1535.5	2025.87	1053.49	953.307	1850.58	2042.19	1392.54	2093.64	1880.06	968.886	1473.82	1251.34	1601.49	1913.58	1278.91	1332.38	1121.63	1487.59	1766.53	1167.96		911.58	1657.8	1044.15
FAM83H	1335.04	1494.29	1835.65	1409.09	1785.57	814.359	1292.28	1117.05	966.222	803.281	1150.26	1023.49	1109.07	958.487	799.111	1154.86	810.316	931.304	1474.13	1180.38	1142.53	1363.63	1188.12	1013.79	1053.32	1027.08	1126.98	1555.39	1474.31	1985.78	1261.17	1072.49	1212.8	1002.31	1560.24	1298.36
FAM91A1	1996.83	2300.08	1419.56	2395.59	2176.26	1812.4	2346.6	2404.24	1503.84	1428.58	2879.06	2860.6	2432.92	2925.22	2303.22	2469.51	2309.82	2698.73	2143.66	2353.86	2295.04	2330.52	2055	2560.97	2389.52	2394.36	2493.04	2067.81	2167.17	1238.59	1781.48	2023.5	2006.89	1909.16	2535.5	1976.92
FAM98B	546.727	320.876	656.59		436.19		718.737	439.004	604.339		475.415		560.989	242.3		318.653	543.385		403.893	129.325	383.44	335.028	697.713		458.983	343.433	363.36	393.613	530.628		470.137	589.139	308.352	320.732	332.599	541.164
FANCD2	103.56		104.039		147.122		159.013	96.5572	451.565		458.397		1067.52					620.151	272.655		175.629	203.461	76.3972	156.182		241.856			508.786		304.427	255.905	188.902	323.105		255.452
FANCI	739.84	665.374	606.811	480.86	786.919	1056.55	775.354	676.611	1130.44	560.559	641.71	676.653	515.445	1020.28	894.972	506.522	1577.28	1224.67	1003.19	954.344	565.14	1072.52	735.358		1208.49	1214.16	1106.54	356.174	1007.21		1002.56	859.41	891.004	872.975	879.407	935.187
FAR1	2571.65	2771.32	1526.14	2418.32	2047.14	2366.48	2666.71	2337.73	2384.87	1902.67	2801.3	1263.26	2643.08	2456.45	2213.06	2308.52	2593.73	2324.57	2155.6	2039.68	2271.05	2519.78	1791.29	1669.65	1998.8	2154.99	2551.45	2345.24	2668.65	4076.92	2231.65	2371.72	2831.54	2806.52	2730.33	2687.67
FARS2	2147.7	2188.65	3922.79	2585.66	4481.66	2559.14	2471.98	2293.66	2201.13	1734.1	2533.72	3432.68	2216.23	1526.39	1806.15	4400.18	2783.49	1867.62	1925.11	2312.49	1493.96	1813.71	2550.85	2187.54	2215.22	2059.45	2746.33	1653.23	1404.91	4812.75	1317.62	1835.98	1812.8	2222.25	1579.14	2498.22
FARSA	4151.26	4166.22	7674.22	4191.17	7099.23	2902.34	4057.18	4139.12	4270.94	2833.59	4123.14	5646.69	3510.27	3574.42	3467.07	3633.29	2764.51	3156.16	4350.25	3725.66	4776.67	4515.39	5192.91	5066.23	3981.82	3123.47	3491.51	3727.14	3919.19	4968.06	4042.82	3983.68	4019.33	3785.63	3212.42	4278.65
FARSB	11132.5	12261.8	6371.42	9884.66	9611.28	11047.3	11157.1	11213.8	10774.5	10090.7	9571.22	8748.26	9809.03	8919.54	11261.7	7881.36	9856.71	9486.23	9468.25	8880.78	10807.3	10964.1	10898.1	8535.27	10708	10416.1	9696.35	11563.3	8196.83	5913.81	11352.1	12108.8	10512	9626.16	11420.5	9151.63
FASN	214400	222484	182112	222589	173993	172267	215345	192523	193832	171824	203889	159501	200838	212584	174090	144995	188008	195363	210936	153022	227385	221534	237623	212112	189919	212126	198898	223550	195856	160030	217470	193571	232307	205806	188800	222342
FASTKD2	744.349		787.027						615.01					676.763						612.511	750.747	860.742	1192.02	508.484					1579.41		799.094			604.867		646.269
FAU	7561.42	7257.16	11316	8841.09	14051.5	6796.88	8350.88	7116.4	8851.58	6463.78	8965.72	14241.7	6555.92	5371.23	9237.41	14577.1	9333.16	6021.15	3171.62	10173.8	6072.57	4120.99	4985.84	6656.85	8291.98	5880.5	10009.3	6414.34	7738	9823.71	7637.8	8437.1	4200.22	7256.52	8310.08	5259.2
FBL	5506.74	4622.07	4231.27	6360.33	4974.63	5256.42	5003.13	4978.65	5883.03	4578.39	5507.25	4316.81	6665.18	6214.08	6068.27	4255.82	5275.94	6894.96	8436.63	7688.64	7390.65	4954.42	6038.27	4520.95	7248.61	5571.83	5564.04	4794.98	6267.04	7071.84	6690.44	4401.8	3807.57	6134.26	6843.24	5139.81
FBP1	18296.2	18701.1	21565.9	27568.2	20015.6	16668.4	17943.4	20319.1	16898.4	16806	19173.6	20604.3	22999.6	20346.5	20263.4	17718.9	15620	18641.4	21251.8	20845.2	23484.5	21768.8	24778.8	28114.3	23415.2	19694.4	20483.9	22588.4	19918.6	18780	17902.2	20763.8	23278.6	15494.4	15024.9	19606.4
FBP2	20566.4	17012.2	18141.9	29094.4	22080.5	18310.8	16111.2	21505.1	20033.8	24443.9	22364.7	21365.3	23602.3	19066.8	23004.7	21643.1	22018.3	21293.3	20163.2	31923.8	19910	14877.8	26271	21416.4	21450.6	17921.7	20686	19530.8	25448.3	12236.7	16429.1	15820.7	25330.3	11160	16305	19052.4
FBXL18	2406.43	1612.75				913.959	1601.63	1310.52	1672.77	2588.83	1330.42		1380.78	806.185	1340.53		1431.69	1209.99			986.041	944.716	1340.92			1565.29		1728.38	1644.95		1861.2	826.243	817.257		1703.48	1251.68
FBXO17																							392.51
FBXO22	4695.87	4821.53	3913.39	4801.4	2757.49	4833.66	4913.79	4482.17	4362.25	5026.61	4619.87	3759	4718.11	4823.82	4775.3	3564.42	4564.25	5239.3	4648.31	3705.19	5337.82	4774.34	5011.42	3763.13	3925.45	4929.24	5443.51	5145.56	4703.95	2276.82	4584.47	4288.92	5710.78	5056.42	5794.27	5604.35
FDFT1	779.138	334.424		282.117			927.441	804.499	944.261		299.871		738.089	732.908			1081.05	1991.59	2058.66		863.246	615.653			662.871	670.874	767.572				1020.91	1138.48	1122.04			372.312
FDPS	4287.03	5646.19	3707.8	4174.66	3014.62	3346.2	4863.61	4422.37	4075.68	6323.83	4496.99	1308.07	5464.21	3828.2	4191.41	2369.14	4832.72	3570.36	5043.39	2696.65	6514.68	5926.68	5077.73	5836.73	5062.23	5522.36	4637.22	5999.21	3120.46	1929.89	5594.9	4954.47	5110.15	4802.89	4512.19	6460.97
FDXR	4905.35	4527.22	5656.08	5636.25	6223.2	5166.19	4804.07	4470.87	4363.61	3861.68	5239.57	6648.09	3092.34	4112.65	3449.77	4391.02	3986.39	4417.32	3030.66	5270.95	3792.57	4561.92	4785.22	4915.71	4296.64	5570.17	5216.94	4315.06	5659.61	6110	4478.6	3758.21	3694.06	4431.56	3805.96	4098.86
FECH	6167.83	6648.36	8427.26	6077.65	6431.35	6732.36	6940.37	6984.3	6861.86	7235.52	7013.14	5659.14	6328.19	7110.96	5823.63	3835.28	6352.58	6819.06	7003.06	5184.22	8213.55	7975.64	7761.73	6945.95	6717.05	7292.13	6918.66	8290.25	6370.54	8954.86	7003.14	7075.86	7400.71	6598.91	7646.85	8155.17
FEM1B		600.217	746.313		751.729		440.414				324.755		1209.53		739.922	739.066	480.047	1060.29	1060.95	345.444	814.949		694.435	1267.86	1364.3					1611.04		330.526		322.162
FEN1	3462.69	3960.54	3413.79	3480.03	3039.2	3128.08	2787.32	3434.48	6610.25	2327.09	4347.43	2330.3	4098.3	3018.99	3954.57	3382.81	4028.68	3977.73	4379.36	3882.27	3564.86	5114.48	3549.78	3486.52	2306.35	3178.92	2169.2	3817.91	4003.4	21408	5381.89	4530.57	4107.15	3986.08	3761.1	3691.47
FERMT2	585.864	605.008	1192.08	949.798	949.465	718.564	807.193	1153.63	724.378	1075.3	1121.59		324.375	1000.27	1013.7		668.667	978.037	509.772		827.052	535.427	822.071	609.404	1003.34	1219.57	896.157	1165.32	741.474		852.095	662.898	873.577	936.386	711.461	587.222
FH	8982.25	8592.64	7240.44	8728.29	6749.42	9514.89	9501.21	9976.41	9780.15	8778.78	8335.73	7703.19	7590.54	8436.26	8493.09	7091.79	8814.48	8767.87	8516.45	7642.62	9369.32	8218.77	10520.6	8682.39	8283.45	9840.28	7599.97	8229.36	9944.49	7476.98	8292.13	9955.25	8353.55	9535.89	7638.17	8764.78
FHIP2A	460.337	544.297					414.123	947.646			863.577		470.733		585.411				551.907		617.12		629.888			671.846					522.21	753.107			854.246	544.682
FKBP10	3192.34	3420.09	3850.14	2734.25	3515.47	2652.29	3233.2	2804.42	2317.33	1595.5	3508.54	4251.87	3734.41	3776.37	2790.54	4534.5	3389.65	3709.82	4376.99	3508.46	3891.87	3637.56	4518.18	3287.24	3923.72	3026.98	3684.39	3374.57	3038.99	2490.91	2391.86	3910.79	3101.41	3713.86	3034.7	3271.63
FKBP15	195.389	592.261	419.271	277.81	291.26	98.498	291.554	185.895	268.298	421.853		292.875	491.395	675.17	249.396	182.588			451.676	973.443	368.604	367.154	311.71		474.945	69.7477	516.618	369.658	262.177	573.718	392.12	265.742	233.013	237.976		352.529
FKBP2			1114.73	1621.22	315.258		613.82	242.198					1618.85	1347.06	827.425	1226.67	835.514	849.231			1492.72	984.262	1059.27	955.906	999.575		1187.94	762.266				398.693	779.58	890.467		997.041
FKBP4	9435.46	7627.66	9733.16	7059.9	10841.7	7783.4	8929.5	8851.41	8148.33	5154.48	9075.61	10563	9207.7	7865.37	9474.62	8383.34	9079.23	8395.39	8460.44	7958.81	7833.34	5802.69	7769.21	7037.77	8419.9	6674.83	6300.65	3559.91	8475.81	5544.29	9414.32	8569.42	8248.22	8561.05	8049.04	7581.78
FKBP5	592.983	417.165					516.245				705.459						308.471	820.278	839.874			804.679	588.073	903.993			666.946				523.321	448.982	423.248	595.572	519.443
FKBP8	310.462	446.233	512.751	561.879	851.794		406.133	565.346	883.383		460.576	589.384	366.635	342.282	642.696		490.81	516.05	924.046	411.524	374.438	452.761	453.645	497.617	563.294	593.57	425.999	496.486			644.401	280.726	404.002	817.252	349.119	272.648
FKBP9	2179.84		2030.6	1507	1714.05		1738.44	1244.96	1253.55		1733.95	4860.41	1504.46		1942.78	4662.05	1344.91		1462.16	2966.1	2080.77	1006.87	2278.03		1293.68					1395.23	2010.5	2569.25	2033.59	1670.96
FLAD1	948.778	1476.74	1489.3	995.483	1914.59	892.54	898.036	1163.95	1094.45		784.458	1104.07	1202.54	1354.34	1059.01	1245.76	1262.41	1108.36	1296.61	647.676	1233.15	1113.99	1447.67	1089.58	1289.97	1700.18	1130.01	1248.04	999.272		1074.11	1342.8	1042.48	1183.83	1348.41	1168.5
FLII	2964.84	3313.19	2933.45	3171.01	3256.33	2985.15	2975.43	3357.65	2871.08	3291.92	2544.69	3177	2933.06	2855.86	2829.55	2852.24	3198.41	3020.5	2836.73	2776.05	3005.07	3293.94	3338.96	3075.09	3504.88	2794.04	3217.12	2962.16	2959.29	3222.33	2960.52	3072.14	2647.16	2674.2	3276.75	2898.84
FLNA	10103.9	13637.6	12005.8	12871.7	11921.8	13033.3	10312.7	12378.2	11942.4	17600	10602.4	11005.9	10331	8500.98	10537.3	10216.2	10229.3	8512.62	10281.8	10652.5	9942.35	12273	10897.5	12602.9	10281.9	11473	9112.29	16821.2	10636.7	16063.3	11056.4	10532.4	10416.1	10576.8	11073.1	10751
FLNB	8824.5	9644.74	9411.56	9945.11	10057.3	8583.31	7939.12	9146.59	8348.67	12185.1	8657.21	9385.47	8594.13	7616.32	8521.46	8932.72	8382.52	7500.47	8706.29	8925.99	9017.82	8127.64	8738.34	9512.12	9167.42	8155.32	8327.38	10364.2	9936.43	8239.51	9361.11	9708.48	8687.51	9001.67	8796.75	9201.17
FLOT1	3223.18	4407.49	2842.4	3580.11	3021.48	2810.83	3744.58	3277.25	3782.47	4273.87	3659.53	3077.44	3576.03	3367.25	2448.35	3071.06	4054.49	3646.57	3931.56	3208.74	4511.17	4208.22	3723.59	3286.39	3714.18	3629.53	3683.87	4066.63	3616.7	2628.39	3286.72	4102.32	4494.77	3764.77	4327.02	4078.37
FLOT2	2786.87	3310.56	3288.54	3019.69	3377.67	2799.17	2911.95	2609.13	3245.35	2837.21	2802.64	3129.82	2940.58	3279.64	2934.84	3167.23	3748.53	2834.77	2988.94	3333.49	3445.73	3603.81	3376.14	3818.26	3349.5	3031.61	3234.93	3164.41	3229.37	3388.31	2631.13	2758.63	2987.79	2699.59	3223	3179.78
FMN1			420.817	2189.46		1197.27		1230.83	548.782	2271.84	901.728									2214.66		1089.93				1159.77	1335.71			1716				829.027
FREM2	10225.2	7533.46	8895.84	8513.93	9353.9	6646.73	9303.72	6101.3	5673.89	9203.58	7005.56	7893.58	5970.95	7809.05	6427.49	8512.31	5600.54	6290.18	6172.69	7574.83	7388.75	6050.94	7960.89	9116.85	8727.55	7737.14	8144.09	8437.3	8709.84	12320	9272.31	6845.47	6066.93	9379.81	7891.25	6714.63
FRMD6	3764.68								4235.81	7100.7						3701.54					2822.05				3468.37	3859.14					4956.85	4205.61	5568.94			3414.38
FRMD8				631.956							334.338		310.699	281.331	289.658						370.189					454.489	328.743	413.834			95.3181	521.552			197.599	283.226
FSCN1	5121.68	4547.14	3897.88	6022.04	3612.05	5144.78	5457.79	4874.37	4874.5	5682.99	5653.57	3827.43	6315.22	5683.6	4972.28	3960.67	5867.97	5495.48	7031.84	3987.68	5718.57	5580.29	5752.45	5314.76	4874.57	5354.44	6568.11	5972.79	5205.27	4188.64	5262.32	4644.07	5826.86	5364.5	5859.34	7479.86
FTO	1987.45	1949.78	2218.44	1392.89	2642.19	1167.12	2424.6	2466.39	1316.88	2028.28	2103.75	2935.24	2330.64	2939.4	1917.13	1804.35	2607	2210.84	2405.4	1646.19	2294.08	2717.6	2861.01	2215.27	1739.34	2047.39	2000.95	2669.88	2286.76	1962.32	2276.79	2288.02	2304.99	2269.73	2142.04	1993.69
FTSJ3	1225.23	833.057	679.357		800.805	959.031	1074.9	1229.88	1459.37	1050.16	1007.38	1269.2	1347.95		1501.5	1036.07	777.925	877.674	854.352	480.586	1082.58	581.254	1224.25	1172.35	871.398	949.712	398.744	616.518	948.387	1607.91	925.972	761.432	498.361	1126	975.056	786.319
FUBP1	2293.03	1274.27	3436.05	1168.62	3452.94	1298.72	1887.79	1245.39	1358.73	816.029	1876.56	2501.73	2644.8	1880.59	1833.17	3009.43	2227.01	1480.83	1814.28	2464.39	1732.56	1078.52	1918.74	1419.29	2215.89	1187.85	1137.36	1376.79	1700.92	1414.82	2068.84	1779.45	1536.73	1532.23	1183.15	2185.77
FUBP3	1445.73	1791.49	2831.89	1313.52	2045.64		2100.27	1377.82	2207.57		1512.26	1593.35	1815.98	1286.62	1776.4	1384.79	1382.81	1210.59	1944.65	1350.97	1129.09	1364.63	2410.53	2095.75	1228.8	1651.07	1395.29	709.647	1922.41		1434.03	1747.04	1388.27	1406.46	1588.61	1920.56
FUT8	1988.99	1706.76	1522.41	1561.15	1049.47	1625.42	1524.98	1444.91	1831.06	1147.56	1579.24	1340.72	1310.5	1391.08	1702.12	737.409	1623.33	1680.84	1422.43	826.416	1679.61	1676.22	1498.76	818.118	1101.27	1598	1240.4	1370.18	1178.24	1176.02	1450.31	1867.57	2142.11	1580.82	1884.77	1309.07
FXR1	6637.67	4970.75	6159.67	5347.07	5638.25	6105.98	7315.89	5646.38	6069.82	3702.44	7148.62	6338.17	6878.48	6858.48	8105.48	6434.17	6812.99	7295.26	5752.02	8617.31	6689.03	4055.45	6848.49	4911.74	8377.29	5173.54	6855.9	3340.18	7060.86	4825.45	6028.34	6190.43	6459.14	7525.42	4547.63	5639.91
FXR2	1174.77	931.221	827.59	1597.61	959.604	840.142	1462.1	1804.55	1226.46	715.427	1469.5	1503.48	1775.9	1397.15	1251.33	2488.47	1382.65	1261.51	1369.94	2065.18	1312.55	1194.82	1255.7	1010.53	1043.18	1032.47	1424.99	1348.5	1467.09		1051.46	1446.5	1120.43	1319.62	751.536	1217.17
FZR1	2914.83	2094.54	1358.24	2172.68	1262.86	2425.99	2730.01	2528.7	3178.87	1701.27	2083.5		3080.11	2686.77	1976.32	1552.89	2682.04	2819.41	2717.95	2825.74	2751.88	2328.75	2046.34	1256.42	3315.14	2554.66	2909.86	2382.58	2975.1		2996.4	3161.13	3427.53	2752.33	2811.9	2420.01
G3BP1	11956.4	11651.1	13817.1	10776.1	12660.6	8705.87	13262.5	10592.8	9035.35	6306.41	12480.1	12640.6	13212.8	11586.1	12634	10834.7	11027.9	11557.3	13509.1	10954.6	15073.9	11082	14538	11704.9	13011.3	9904.96	11314.8	8175.26	13164.4	10886.7	11307.9	12996	10926.8	12414.2	8217.8	13093
G3BP2	2469.12	3247.37	2979.58	3818.63	3013.21	2573.6	2322.48	2670.3	3128.43	2388.18	1571.42	2665.01	3310.82	2877.88	1490.89	2040.66	3223.48	3308.8	3228.61	2169.37	4656.88	4094.29	3830.99	4602.6	3096.02	2502.02	2332.81	2363.57	1399.35	2989.44	2631.79	2717.59	3444.37	2904.86	2879.84	3163.82
G6PD	110355	135880	92609.1	135246	84035.3	109833	125046	121682	105672	96663.5	110787	86789	125677	127028	101091	77705	125150	127841	132660	86524.5	142008	139745	141101	137647	127670	126014	129136	143064	101351	89306.8	118623	123428	130504	106863	131583	128534
GAK	2862.81	3044.74	2684.6	3420.27	3223.28	2865.19	2950.88	2933.02	2547.75	2120.04	3035.66	3278.76	2546.4	2676.04	2576.42	2666.23	2759.94	3284.91	2426.85	2875.83	2633.44	2745.64	3449.62	2951.58	2444.9	3057.73	2766.7	3026.99	2729.42	2584.69	2925.35	2572.32	2511.35	2501.53	2561.12	3099.68
GALE	1841.96	2374.6	1353.24	2358.95	1200.58	2358.37	2015.83	2642.03	2223.41	3343.23	2129.59		1264.24	2276.14	2584.41	951.45	1895.74	1632.96	826.962	1133.79	1833.9	1514.83	1540.88	2009.18	1398.71	2064.7		1234.18	1078.32		1683.87	1802.64		1712.02	1691.97	2126.94
GALK1	2792.2	3653.75	2926.95	3661.73	3643.18	3299.98	2920.72	2992.48	3560.05	3466.92	2186.47	3135.33	3338.34	3354.37	2712.3	2623.18	3448.53	2586.07	3435.04	3106.85	3057.41	2985.86	4059.43	3261.47	3327.72	3619.63	2356.37	3533.48	3182.87	3618.55	3207.76	2997.89	2821.5	3119.31	3451.19	3320.92
GALK2	2321.62	1843.87	2862.55	3359.12	2707.79	2529.19	1225.26	2448.56	2225.72	5209.7	2946.89	2696.66	3223.59	2673.52	3462.96	3463.92	2337.76		1673.23	4001.17	2368.18		2809.68		2535.73	1781	3343.51	1705.1	2832.12	4558.35	2631.35	2443.94	3004.05	1449.54	2539.1	3087.01
GALNS	856.499	828.527	2082.76		1061.49	717.68	816.734	950.016	964.728		339.257		624.854				505.802	776.495			854.918	731.127	819.875	942.866		1327.54	731.355	1142.53	588.506		746.771		1079.91	663.278		675.149
GALNT3	456.082								521.616					1407.78						1645.17	766.089		837.676									1162.11
GALNT6	1019.37	983.634	1035.8	961.836	1067.61	1045.28	1083.67	977.255	1161.12	1421.58	964.698	1213.73	1094.86	1009.83	1030.45	1238.03	1075.24	1183.75	1010.26	1279.62	1068.1	1060.98	938.044	1170.09	910.147	1106.48	1305.16	1230.18	1132.44		1020.8	676.539	987.278	1011.68	1075.84	1308.09
GALNT7	631.425	338.681		746.964	620.653	623.752	825.896	908.58	481.757		896.217	505.602	1054.24	1364.88	709.015	902.829	1143.12	690.526	920.064	1033.65	1042.66	844.206	840.65	467.971	1139.72	426.732	437.06	977.737	887.393	1272.9	623.355	495.458	819.966	762.12	678.006	900.986
GAMT	2116.42	2667.47	2402.45	1800.7	2721.68	2591.94	2197.57	1872.6	2230.3	4011.23	2314.61	1906.57	2070.74	2245.95	2066.02	1680.48	1312.51	2464.53	2440.36	1667.2	1991.8	2370.01	2037.54	1894.04	2723.66	2239.97	1904.93	2606.13	2192.15		2117.55	2752.51	1959.4	2192.67	2263.12	3084.09
GANAB	24321.9	22485	23240.7	23944.8	20066.2	17315.4	24336.3	18121.7	20962.4	15615.2	20747.4	20709.4	23513.8	24884.9	16907.5	15650.8	26009.7	25788.8	30176.4	22810.5	28540.2	27126.7	29440	27472.5	24151.9	23788.3	26148.7	26128.4	19834.1	18583.7	22590	21076.5	24750.3	21669.3	21637.6	27030
GAPDH	1122470	1094230	1191040	1210050	1140950	775687	1122740	893590	1172290	844721	1116250	1097220	1125660	1171920	880537	790410	899597	1124370	1204390	800010	1176120	1187440	1213430	1210990	1160330	1151360	1104960	1054330	1187650	1073840	1094040	914263	1270210	1206430	1045370	1341230
GAPVD1	959.646			1084.97			1573.25	921.939				756.227	728.815	885.041			983.587								966.163	1248.74			1751.85		494.27	1044.83	726.572	701.054	1073.56	496.403
GARS1	9464.79	8876.68	8470.48	9775.47	7764.02	8273.82	9393.43	8824.96	8648.87	8928.69	8743.97	7808.91	9132.36	8742.61	8349.69	7811.46	8504.25	8500.54	9857.13	8206.79	9915.94	9703.8	9085.25	10509.6	9194.58	10484.5	8702.34	9164.76	9271.16	6893.13	8771.69	7561.12	8311.04	9157.75	9245.05	9857.08
GART	18501.9	16119.5	15832.7	17362.4	13736.5	17401.2	17026.1	17372.2	15940.6	15501.3	15868.8	15689.9	16856.1	18166.5	16201.6	13629.6	17356.5	16691.6	16609.6	14569.3	17191.9	18521.5	17964.7	17498.5	14388.4	18360.9	17602.9	18480.4	17484.2	17823.6	16705.6	15214.3	17608.6	17333.5	16598.8	17107.3
GATA3					556.236	894.621	572.768		589.853								330.978	396.583	1315.86	1315.05												134.276
GATD1	330.826	442.034	1502.57	496.559	912.281	243.301	613.966		280.353		208.663						294.328				327.848	378.698	893.832	1098.32	712.601	564.864	706.185	375.517			533.817	744.723		274.598		619.676
GBE1	640.291	1279.63	1187.97	1602.09	1656.12	1732.11	1212.17	1723.28	1563.34	1319.42		1556.89	848.826	1682.98	1546.51		2471.01	1674.91	1537.67	1183.26	1203.75	1778.63	1386.2	1594.62	1325.44	2208.66	1779.11	2295.98	1331.77		1255.54	1822.85		1282.11		1853.64
GBF1	309.482					205.723		394.178	377.471		301.18			205.116			413.355				458.971	410.835	141.32			575.051	408.488				350.645	263.231				348.253
GCDH	8145.94	6108.85	8442.31	9966.81	7053.4	9569.63	7796.97	10452	8713.27	7732.2	8370.33	9655.09	8862.39	7684.08	9759.83	9339.36	9461.12	6820.76	7046.91	8121.27	6149.86	8711.87	7281.86	7199.26	7439.08	8949.61	6632.44	9189.84	8632.79	9779.53	7498.48	6858.15	7257.48	7318.32	7600.06	9111.46
GCLC	2233.7	3138.6	1880.71	3467.72	1778.7	3205.47	2194.92	2961.82	2239.23	2957.86	2452.47	2564.03	4424.19	2871.61	2561.78	3039.69	3313.17	3141.69	2938.46	3044	2549.16	2763.48	3885.17	4560.71	3506.35	3157.74	5506.06	3232.52	3393.37	2892.36	2802.65	2765.06	3410.01	2259.14	3262.05	3962.98
GCLM	1146.27	1819.38		1327.82	585.831	1109.13	1399.51	1033.22	1395.92	977.549	708.377		1093.68	1244.54	743.058		1184.36	814.942	759.756	1029.54	1115.8	1972.21	1055.89	857.931	877.243	1837.8	1516.57	2116.12	493.944		618.603	1003.03	815.87	1571.73	737.401	1298.56
GCN1	12654.1	12564.6	10303.3	10598.5	12727.8	10674.1	13407.1	12498.6	14180.4	11311.6	12416.1	10858.1	13589	12915.7	12167.4	11215.4	13371.9	14132.6	16432.3	16291.7	13931.2	11389.1	13039	11205.5	12927.9	12348.4	12542.4	9374.55	13672.8	10316.6	13829.8	11366.9	13498.8	13227.8	11826.1	12340.8
GDI1	9117.12	8159.25	9251.64	9448.08	8874.41	9912.56	8921.45	9087.55	7384.47	9867.32	8956.26	7953.7	8955.07	8932.39	7407.99	7626.82	8092.73	8411.49	9181.39	9515.45	9268.25	9671.67	10159.2	10516.9	9673.05	9731.28	8591.27	9777.27	8167.85	7659.46	8688.17	9214.49	8933.89	7830.25	8918.53	8189.16
GDI2	25214.3	24375.7	18191.4	21510.8	18248.3	24144.7	25111.4	23583.8	24293.1	17783.4	22811.3	17947.9	22970.1	21533.1	19222.3	19825	21567.7	20494.3	21623.1	17224.2	27691	25747	24394.6	22656.2	23691.2	24411.8	20866.2	21066.8	21494.4	14100.2	24620.6	24107.5	25079.4	25090.3	20080.5	26596.8
GEMIN4	1840.87	1609.83	2749.96	1305.22	1645.7	1585.65	1618.9	1652.67	1628.95	1248.97	1436.05	1496.12	1266.24	1693.04	1590.3	1836.82	1573.14	2059.35	3170.71	2127.5	2001.02	2008.96	1641.36	1976.59	1476.32	1345.73	917.957	2024.65	1594.16		1781.06	1566.89	2131.71	1593.63	1435.36	1550.21
GEMIN5	3252.25	3059.16	2154.67	2757.89	2157.81	3030.21	3388.5	3326.94	3309.18	3007.54	3571.95	2602.9	3054.87	2885.51	2817.53	2480.78	2953.48	3118.97	3030.58	2581.81	3024.68	3246.2	2948.68	2297.32	3444.68	3636.44	2967.88	3012.24	3027.31	3289.71	3354.62	2978.86	3247.69	2861.61	2588.14	2861.05
GET3	9211.46	12557.6	6747.76	9737.67	10081.3	7923.02	11011.9	9201.26	7265.34	9910.08	10185.6	6039.09	12762.4	10061	10933	7273.48	12975	11934.1	12861.2	8320.39	11222.3	10254.6	11619.5	12182	10886.4	9893.34	12369.9	10061.3	7817.52	6982.82	11931.6	11959.5	10948.1	9848.54	9838.83	10202.5
GET4	4487.85	4261.05	1883.28	3075.3	1518.19	2970.4	4109.32	3685.98	4530.79	5515.27	4027.62	1222.69	3343.08	4061.26	3515.39		3530.25	3510.62	3912.62	2120.37	3387.77	5596.44	3694.67	2448.56	2023.04	5207.27	3888.28	4634.35	3110.43		4340.08	4938.48	4308.78	4856.82	4430.11	4868.42
GFM1	10981.1	11051	10484.8	12354.2	9118.36	12275.1	10746.9	11261.9	11025.9	7330.62	11250.5	9399.59	12107.8	13036.3	10916	11049.4	12162.5	10237.8	11489.8	14229.1	10462.2	12215.7	11523.1	10782.9	11486.2	11598.7	12551.6	11749.2	11886.5	6885.69	11097.6	11085.6	11135.7	11134.2	11982.6	11613.7
GFM2	535.702	200.852	676.141				614.733	94.2671	289.097		423.962		413.715	423.085			520.759				451.037	509.322	548.31		339.594		244.77				216.019	214.767		518.312		496.455
GFPT1	9786.95	10240.8	7856.41	10886.7	7321.41	9417.09	10530.2	9761.9	10488.7	10767.9	10416.4	8047.48	10081.3	9936.98	9428.41	7542.99	9298.24	9742.3	8222.81	7965.11	9328.71	9458.66	9847.75	8040.71	8770.92	9148	8806.16	8985.13	9781.97	5221	9388.98	9432.06	9717.63	10846.8	9043.24	11036.4
GFRA1	4260.69	4000.06	4619.6	4087.39	6444.23	5295.88	5740.71	6468.82	5535.99	6399.68	5287.71	4131.28	4634.16	3708.04	5463.25	5711.43	5741.81	5169.38	7254.89	6990.13	3957.68	4493.59	4449.46	5473.94	4057.56	4419.12	4078.07	4106.86	4402.73	7784.11	3766.57	4758.99	4381.91	3293.38	3933.72	3541.23
GFUS	5332.57	5524.75	6151.72	4919.51	6181.71	6303.01	5686.98	5933.77	5834.68	5669.27	7088.07	5696.11	6195.74	4788.63	6334.98	5505.58	5688.2	5469.5	5973.97	4355.82	5265.59	6048.46	5937.13	4516.57	4344.01	6247.92	6391.26	7741.68	5845.7	6949.71	5307.08	6465.8	5761.5	6932.98	6409.62	5981.43
GGA1		452.371			1038.9		925.628				1151.74	946.703	483.261	510.275		672.247			590.962	787.695	1128.99	1057.81	1232.51		886.17	603.379	802.739				1204.11	707.18		647.802	447.292	1111.97
GGA2	649.207				136.984		662.376				460.928								182.636		178.469	333.524	662.153	237.288		530.771							182.047	615.297		211.725
GGCT	8241.46	7039.64	3572.67	6539.73	3170.85	8047.85	8046.63	7420.25	8643.47	7637.43	8965.98	3460.66	6047.99	7257.4	7535.49	2716.89	7821.58	8405.4	7392.88	5061.76	6257.09	6457.6	6449.84	5161.18	5448.81	8481.05	7014.65	6683.91	8131.2	2291.24	8235.72	6883.98	7257.56	8563.42	6959.72	7801.45
GGH	1670.06	3061.36	2079.97	2292.51	2730.14	1862.01	2478.78	1807.96	1934.67	2217.23	2800.84	2061.19	3498.95	2476.16	2256.13	3457.1	3681.93	3153.95	2656.08	2608.8	2103.26	2534.14	1387.85	2052.84	2195.21	2806.82	2666.04	1988.51	3875.19	2731.95	2401.79	2256.52	2830.65	2293.44	2127.97	1940.58
GIGYF2	731.543	837.296	1688.03	721.113	1017.84	838.887	612.314	816.23	967.317		939.393	1729.02	790.809	480.824	815.016		864.137	1471.43	934.289		829.694	531.925	483.637	868.145	723.976	456.939	616.219	660.313	1130.04			796.613	807.991	690.902	902.876
GIPC1	2048.98	1554.94	2115.69	1236.54	2300.13	1663.54	2200.79	2802.62	1713.7		1298.78	1784.41	1903.86	2261.5	2185.05	2009.74	1992.9	1585.68	1070.47	1730.13	1769.29	1599.13	1346.92	1463.15	2109.32	2088.86	2016.29	1107.82	1386.71		2010.8	2233.52	1825.28	1819.02	2327.94	1631.3
GLB1	3344.1	2993.21	1709.39	2626.64	1596.65	2527.97	3195.82	3280.23	3500.28	2634.08	3452.42	2095.5	3712.21	3286.49	3112.47	1410.87	3410.73	3622.58	3715	2729.57	3855.43	3609.41	3030.42	2561.99	3482.99	3499.57	3734.27	4022.62	3828.33	2972.67	2986.26	3303.97	3439.17	3354.63	3212.03	3654.61
GLG1	2353.77	1767.02	1990.57	1984.05	1549.31	1384.21	1883.33	1741.54	1749.99	1289.01	2363.46	1766.91	2216.07	2356.72	2286.5	2555.21	2647.98	2069.71	2603.09	2696.83	1944.66	1919.7	1888.88	1568.9	2180.15	1565.68	1687.17	1617.16	2419.6	3731.51	2879.72	2981.72	2117.99	1884.73	1800.91	1968.95
GLMN	393.822	268.055						391.663	424.561				349.204	375.066	303.282			308.283	463.09		198.191	218.43				436.923						506.436				511.315
GLOD4	9560.29	9296.01	12085.3	10338.7	13165.7	9725.72	10100.6	10879.7	10460.5	8385.17	10068.2	10294.8	10249.7	10106.5	11240.7	12040.7	9895.45	8242.6	9868.21	10393.1	9296.43	8128.07	9910.68	10983.6	9922.15	11117.1	10343.3	9300.88	10201.8	9374.26	10141	10860.9	9840.21	10256.7	9053.95	9961.71
GLRX3	977.809				771.719		1179.57	904.131	1223.27	1104.95	1279.76				783.151		895.524	788.026	1518.16	991.906					779.125							1238.03		584.944		1275.34
GLS	1352.49	1912.35	2543.7	1288.84	3601.75	1596.08	1482.64	1004.85	1384.02	2687.09	1687.37	3404.44	1623.69	1649.74	2295.56	1684.87	1261.42	1884.25	1939.92	2102.82	1035.25	1236.54	2238.35	1599.17	1100.95		1633.98		1330.3	2332.41	1658.46	1637.68	625.381	1668.62	2444.72	1929.83
GLUD1	3308.83	3934.35	3374.33	3835.53	3651.44	2704.79	3593.55	3010.24	3345.11	3401.33	3034.72	2984.43	3712.45	3176.01	3016.22	1728.7	2677.4	3475.09	3397.02	3251.52	4591.85	3908.4	4279.98	4147.56	3941.38	3756.96	3488.17	4757.47	2533.59	3889.74	3668.67	3390.21	3702.33	3814.72	3222.06	4380.42
GLYR1				991.552		1599.68		969.74	1276.65		1247.12		1345.43	1453.42				882.458	988.747			1002.92						933.833				1161.89
GMDS	2287.68	2243.39	1435.65	1736.29	811.457	1569.76	2029.28	2068.32	1584.11	2242.8	1785.45	1524.09	2528.9	2624.8	2210.76	1045.64	2045.52	2065.69	2285.78	1092.97	2967.41	2965.81	3452.66	951.236	1831.14	2289.51	3175.57	3040.98	2777.51		1877.59	2396.72	2682.54	2241.72	1908.52	2468.76
GMPPA	3926.93	3897.99	6423.07	4003.05	5149.04	4129.7	2156.64	3990.5	2991.42	4674.18	3605.68	4967.99	3963.34	4315.23	3459.99	4111.72	3369.33	2503.07	3928.37	3188.2	4146.42	4667.43	3963.18	5609.09	4511.12	3551.19	4073.18	3199.33	3769.22	2886.72	2527.81	3007.79	3740.99	3869.45	3723.57	5461
GMPPB	4457.07	2147.74	11369.5	4413.67	7278.43	1198.78	4111.98	2689.98	2820.86	3965.07	2904.41	4475.83	2886.42	2385.54	3210.2	2831.83	2847.47	2211.1	3413.06	3257.2	2538.12	3072.29	4034.01	2567.83	4789.68	3690.04	2895.21	1975.5	4855.9	3622.42	2766.87	2261.47	3630.22	2705.73	2666.74	2809.96
GMPR2	897.597	2144.05		1339.24			911.251	748.994	956.584		1006.31		1657.68	1054.04	815.105		1347.79	1738.59	1704.35	887.614	1548.11	2311.98	1589.13	1524.49	1917.22	1267.08	1776.87	2059.87			1030.49	1858.92		954.597	2338.6	1097.81
GMPS	17417.2	16644.2	18353.2	18058.5	18338.7	18404.7	19835.3	17527.3	16192.8	16036.6	17246	16704.9	16437.8	15795.8	19487.4	18223	17083.1	14896.7	17356.2	19430.3	17790	17327.1	19037.1	18519.9	16540.5	17527.9	16330.3	17190	18381.7	16497.1	17479.2	17740.7	16910.3	16507.4	17065.9	16450
GNA11	1941.71	2184.65	1683.38	2056.34	1376.07	2115.76	2276.32	2231.66	2032.96	2334.75	2294.13	1710.23	1470.99	2182.02	1711.08	1229.62	1383.88	1277.46	1948.56	2224.89	1289.39	1982.93	765.587	1956.86	2403.23	2551.52	1110.94	2749.24	3536.52		1734.95	2314.4	1827.59	1904.22	2406.33	2038.79
GNA13	3215.37	4243.61	4113.19	4489.85	4022.56	3804.92	3442.67	3904.86	3741.66	3134.71	4010.73	4378.36	5052.61	5087.84	5608.37	4691.14	3487.61	4076.39	4506.47	4306.11	4775.52	3499.26	4600.35	5069.23	4493.34	3507.76	4912.84	5702.66	4618.78	3929.56	3745.76	4264.36	4844.8	3834.46	4491.93	3797.7
GNAI2	6947.91	7599.59	12792.1	11171.2	12136	11072.8	12338	8918.32	11148.8	13902.4	10658.7	9054.7	6766.09	11037.8	11346.1	9963.03	7458.52	7823.94	9982.94	8116.52	9020.78	9076.66	10395.5	12191.3	12180.1	7838.23	10274	12118	10776.5	6962.84	9105.89	9661.71	7964.44	11117.3	9363.55	8628.2
GNAI3	9053.53	10505	8385.53	10228	8549.04	9927.96	9536.21	9146.92	6819.67	11869.6	9321.08	6699.17	9121.66	11209.5	9472.32	6057.19	11445.9	9614.58	11611.6	6237.49	11744	11568.8	12145.1	11344.9	10744.6	11340.8	11997.2	12857.1	11506.8	9090.61	9984.73	11668.9	9923.7	9402.37	10065.5	12943.4
GNAQ	482.478	278.901	1569.99		604.768	804.912	480.178	531.381	955.35				345.049		515.057		322.519	380.617	413.037		651.402	393.949	947.334	792.645	1034.45	851.514		481.234			603.193	477.946	334.519	900.392		567.548
GNAS	27325.3	24401.1	17837.5	22467.3	16746.3	27844.6	27258.6	27090.5	25925.1	27392.1	23763.7	17529.2	23263.8	22592.6	23668.2	16639.6	25261.2	23494.8	21883.7	18394.6	22914.6	23368.3	21884.7	19007.7	22079.1	27254.9	22722.6	23986.6	22997.4	12614.8	24262.2	24049	23192.7	23371.2	24983.8	20337.3
GNB1	16961.4	18503.2	19194.8	18481.1	15606.8	21367.4	17380.4	17920.3	13163.8	17637.4	15017.1	16789.4	15333.9	19546.1	16238.4	12575.8	14797.9	17368	19799.4	21091.3	24640.9	20165.7	17027.1	21971.9	16985	18566.5	21200.8	19375.7	13633.2	22161	15578	16070.5	12091.5	13739	16387.5	18452.3
GNB1L	1564.5	1568.07	1042.53	1490.34	878.209	1456.55	993.976	1513.5	993.143	2167.43	877.721	482.738	1303.74	1510.01	2007.96	2539.02	1440.75	1337.17	1334.45	1481.06	1217.33	1208.73	1365.09	1716.38	1447.72	1187.54	582.678	1390.31	1813.72		1021.95	1610.05	1110.86	958.456		916.901
GNB2	38016.3	30044.7	26133.6	30540.7	21468.2	19379.7	30502.5	26722.2	29046.8	32202.3	39528.2	26918.9	32300	41355.2	34205.9	20890.5	24973.8	26712.6	28358.4	18296.7	34290.4	34107.2	39052.8	25858.3	25583.3	35009.7	32351	31919.1	39806.5	20103.3	27873.7	25093.6	27554.9	38001.7	23162.5	39194.5
GNG12	159.246	168.269			143.208							243.671									93.4209					103.039									181.969
GNL1	342.493	962.945	972.405		412.655		693.2	675.323		373.187	253.44	392.826	259.955	461.139				288.341		409.357	581.513	445.417	785.463			422.398			467.045		408.863	664.915
GNL3	2947.79	2153.47	3089.6	2535.72	3035.81	2353.96	2353.24	1104.24	1572.67		2514.79	3137.91	2968.07	2352	2889.71	2140.6	1815.63	2067.58	1723.57	2304.46	2405.79	2678.62	2705.59	2503.35	2830.6	2420.44	2493.95	1871.1	2420.13	2139.2	2024.94	2130.18	2641.59	2392.59	3553.97	2041.82
GNPDA1	3811.65	4465.79	1723.7	3753.76	2649.89	4965.63	5332.46	5158.35	4059.14	3217.87	4306.99	2399.67	5016.5	4088.05	4624.1	3349.27	4425.01	5199.88	3709.72	3100.54	2210.43	2715.87	3576.03	2813.26	4368.89	5822.84	5111.3	3640.9	2922.86		4151.62	5211.45	3892.38	4169.77	4436.61	2974.57
GNPNAT1	1405.63	1584.06	916.394	1156.78	981.161	604.92	1226.52	1091.86	1162.84	1751.89	1076.24	1246.41	937.943	818.596	853.531	478.902	949.6	1036.58	1352.74		1544.57	1437.61	1309.93	877.378	1123.1	1267.74	785.736	1229.97	1493.33	2260.12	1520.33	1041.29	1114.72	1067.52	939.844	1307.28
GNS	3240.25	3106.27	3697.9	3706.51	3941.25	3582.91	3089.42	3174.05	3141.75	2991.31	3710.19	3490.36	3764.97	3202.99	2968.16	3373.3	3264.05	2881.06	2623.29	2438.25	3384.5	2925.6	3306.5	3787.7	3790.88	3162.74	2612.13	3600.69	3335.51	4555.59	3164.42	3291.7	2292.68	2699.25	3769.43	2513.52
GOLGA4	1014.15	799.976	870.882	1580.52	897.898		494.362	727.415	507.169	323.722	551.974	439.024	782.705	880.363	894.206	767.734	1356.11	548.37	581.768		876.405	463.503	1032.24	1224.72		900.347	842.485	1013.02	1101.64	1022.33	1273.06	1051.31	776.658	576.439	772.614	359.936
GOLIM4	1660.98	673.188	2179.91	1652.88	1468.85	1273.39	1256.13	1604.38	1209.13	1760.28	1482.22	1681.03	929.235	1058.41	1603.07	1529.55	1040.58	1050.71	1593.73	1234.84	773.624	1782.55	1130.96	1552.99	707.118	1071.35	897.838	1001.85	1536.14		1059.27	1070.25	2252.21	1259.78	925.49	1255.24
GORASP2	1067.1	412.197	488.667	431.69	1284.75		1424.03	617.224	694.185		1332.69	1208.61	836.664	726.381	1248.51	1169.09	1350.07	1240.54	986.572		1035.69	476.15	566.866	555.743	1024.88	498.831	921.429	533.132	563.475		1135.9	954.189	686.799	1337.89		1009.8
GOT1	7226.04	6422.47	7511.7	10756.9	7405.38	7681.81	6752.42	10272.3	8162.86	7529.6	6410.95	7363.8	7151.15	6480.63	7138.8	5554.7	7252.54	7469.03	7409.03	7499.74	8021.54	6941.5	7045.13	6601.35	5358.28	7899.64	6298.9	8256.7	5928.52	5792.46	6704.3	7744.78	8816.9	6152.97	5508.43	6445.72
GOT2	19540	17797.7	13529.7	15180.7	9751.7	18847.3	20032.1	19066.7	18461.3	12969.1	16586.3	8393.11	16960.2	16938.4	15784.5	9876.18	17616.5	18187.5	19053.3	11822.3	18146.9	18519.6	20203.1	16118.1	14719.8	19695.6	16688.4	16150.2	16019.6	9020.38	16416.9	18160.7	18404.6	17006.9	17016.6	17125.9
GPAA1	1241.33	1511.31	1048.94	651.793		963.953	1131.12	1019.53	858.83		966.135	607.751	1336.62	1642.93	1282.08	2156.22	1273.25	1445.9	1651.45	1827.57	1290.88	1781.99	1666.31	1457.61	2026.58	1390.26	1723.73	1816.02	2374.3		1387.51	930.785	1338.33	953.648	997.523	1453.44
GPAT3	501.944			1443.67			988.085	91.0823	366.405		112.829		461.838					498.182	928.84		525.628	825.544	623.929	748.286	719.026	1164.95	213.505	872.871	292.1	1259.45	644.813		436.155	323.527		959.973
GPD1L	3790.36	3195.84	2509.76	2383.63	2373.53	2231.45	3344.25	3474.72	2877.43	2517.75	2443.11	2655.53	2442.76	2672.22	2776.63	2971.41	2414.75	2442.12	2321.21	2645.53	3366.91	3262.02	2351.07	3401.24	2871.02	3371.2	1637.13	3465.12	2228.03	3571.65	3390.68	3385.18	2609.65	3531.15	1792	3840.94
GPD2	1649.12	1673.89	2301.31	2374.61	2088.16	2319.72	2184.42	2023.21	1736.25		1899.3	2511.27	1747.1	1849.06	2690.59	2288.87	1990.22	2086.64	2409.86	3078.3	1672.26	1094.66	1733.29	1762.96	1615.23	1386.54	1628.43	1981.92	2129.17	1459.62	1846.36	1605.63	2130	1683.73	1861.96	1192.58
GPHN	2998.74	3134.98	2702.93	2501.82	3083.08	2533.24	3037.19	3029.34	2796.17	2545.2	3403.52	3142.44	2959.38	3243.7	3313.52	3138.41	3566.54	2837.85	2468.58	3538.11	2230.32	2891.96	2518.32	2471.17	3058.67	2370.34	3368.76	2368.94	3582.08	3792.74	2880.17	2861.3	2252.11	2623.69	3554.05	3169.99
GPI	98740.9	98518.9	46190.7	84413.3	51825.7	78312.9	105904	102314	85544	65248.6	88791.7	36268.2	92179.8	84889.4	74734.2	29196.6	85437.6	88527.7	91960.3	45686.6	112319	102243	95884	78064	76921.2	103306	94424.1	106417	77684.6	30709	93879.9	107596	97137.4	90122.4	79172	87317.7
GPN3	562.775	837.117		402.047		227.589	504.999	453.952					350.654	632.351		661.537	379.431		217.865	1008.2	820.486	346.986	503.327	391.111		495.167		462.309		736.996		492.619		500.954
GPS1	479.511	746.145	431.591				723.717		376.39		315.117		899.415	851.012	1011.09		408.342	968.826	1230.04		601.552	1301.53	707.333		458.25	436.806	512.287				941.831	593.369	668.134	520.089		598.036
GPT2	1044.82	608.112	1618.78	775.164	993.845	982.414	715.427	671.746	694.393	1273.74	845.055	710.673	674.376	626.564	570.328	833.474	619.702	729.312	704.096		1172.86	823.221	908.707	486.713	476.348	627.396	635.77	1103.92	671.611	913.728	794.361	955.125	944.94	531.427	732.82
GREB1	846.054	567.591	1267.07	539.411	1022.4	970.593	1207.9	896.124	1298.97	1129.8	1480.65		1303.39	1279.78			917.689	799.676	1443.49	541.939	1010.41	1270.11	819.383		1015.35	1039.8	1057.82	1045.12	1743.48		999.476	647.452	1219.51	867.336	826.048	1822.55
GRHPR	4564.57	2499.81	5001.65	3136.31	4232.97	3720.72	4211.72	2553.47	3567.07	2728.3	3929.38	2170.15	2678.08	3221.91	3793.63	3215.74	2671.32	2589.19	2255.3	2515.04	4130.75	3152.3	3590.58	4597.17	3272.04	3816.63	3611.22	2879.74	3311.48	3711.17	3093.9	3602.27	2663.59	4436.99	2785.44	2822.77
GRPEL1	2019.65	2573	1928.9	1610.48	1719.09	1917.3	1918.87	3103.82	3218.09	1942.8	1628.87	2260.47	2048.52	1826.2	2851.97	2120.08	3077.19	1327.67	1221.43	1756.54	1227.27	1485.65	1426.8	1400.62	1742.07	2135.85	2043.97	1480.03	2035		2404.35	2080.54	2837.46	2077.04	2154.43	1689.3
GRSF1	3847.94	1376.13	2761.71	1863.85	3603.5	2349.89	3176.07	2092.49	2823.11	1244.98	2651.23	3696.12	2362.01	3181.42	2195.59	3185.85	3190.94	2449.05	1519.6	2504.4	2856.72	1304.65	2562.81	1502.59	2916.77	1871.98	2451.3		3159.55	1482.01	2600.78	3069.72	3167.97	3198.34	1326.98	2492.05
GRWD1	2764.32	3801.33	2483.94	3945.8	2106.72	3892.88	2976.57	2639.45	3560.58	2840.5	2650.21	3211.25	3189.36	2584.36	2456.27	2545.19	3206.39	2854.83	3479.25	3135	3191.12	3942.01	2518.69	3510.83	3531.12	2754.9	2848.96	2665.23	3695.36		3951.71	3844.17	3155.47	3699.83	3429.52	3476.22
GSK3A	3049.18	4627.11	2408.19	4743.94	1998.82	2866.71	3325.09	3179.79	3807.3		2904.93	2940.92	2880.13	4516.67	4181.25	3030.71	3674.84	3758.34	3514.86	3776.79	3245.42	3972.54	3828.02			3342.27	4102.1	5288.45	3413.41	4253.32	2750.79	2980.78	2438.93	2659.35	3569.95	3666.44
GSK3B	3421.75	2077.63	2961.35	2177.68	3375.55	2846.87	2192.76	2291.56	2307.82	2528.4		3840.03	2060.92	2886.09	2725.08	3999.37	3076.7	2716.94	1976.35	3627.06	1578.12	1834.04	1428.19	2186.25	2710.82	2178.13	3245.42	2601.95	2311.46	6553.39	2259.84	2212.26	2902.68	1944.51	2399.2	1701.64
GSN	548.854	157.238		408.786			802.475	518.504	513.554		444.419	551.767	515.971	595.404	806.002	617.562		579.848	495.908	760.514	344.687		355.292	515.233	522.676	342.14	645.453		294.097		308.941	509.831	659.281	347.736		671.595
GSPT1	2107.14	2499.52	2396.64	2443.32	1339.17	2009.51	2628.63	1856.69	1801.03	2297.53	2089.41	1992.9	2413.47	2496.45	2146.04	1467.99	1634.75	2458.4	1740.77	2143.28	2354.74	2560.55	1811.18	2322.29	1276.66	1895.94	1392.89	1811.47	2129.42		1825.18	2388.76	2266.68	2094.66	1635.58	2260.9
GSPT2	2030.3	2442.4	2492.93	2119.5	1848.1	778.338	2300.63	1214.6	1136.23		1003.84		3389.45	2485.52	782.216		1529.27	1491.24	2933.71	1926.29	3354.37	2147.75	2628.06	2988.15	1699.2	1334.8	2057.02	2587.29	1493.74		2454.05	3244.38	2794.37	1647.72	2972.15	2553.86
GSR	27086.9	25133.5	25511.7	29507.3	18775	22467.3	27553.4	27298.7	23752.3	24020.4	28420.2	25208.7	28470.6	33622.9	28741.3	23974	27849.8	28084.4	26521.8	25831.5	24991.7	30718.9	30341.7	27321.8	25481.1	28506	27199.2	22868.3	27696.2	22917	24747.2	21711	25251	26587.5	29645.5	29725.9
GSS	7238.76	7970.03	6043.68	7771.29	7222.43	7452.87	7866.16	6272.71	8245.19	7456.71	7243.56	8155.44	8315.01	7399.84	7650.36	8489.95	6966.39	7281.55	7763.88	6204.56	7832.25	6423.91	8893.94	9201.87	7655.78	9457.63	7331.84	8518.83	6529.33	8878.55	5907.18	6662.21	7298.2	7027.8	6756.53	6997.1
GSTCD			499.17																				276.773
GSTK1	652.442	854.819	838.894	841.808	920.898	408.032	1155.66	555.929	1221.68	652.217	701.342	850.365	1549.28		715.241	1043.93	1119.51	295.006	510.977	931.32	769.932	484.623	679.326	796.397	936.053				677.367			1036.95	1483.74	963.096	1727.18	771.182
GSTM3	8112.34	8428.17	5481.35	7137.9	6964.62	8808.23	9201.58	8088.45	7979.08	8652.7	7820.06	6117.52	7037.41	6479.25	7586.58	6356.36	8251.82	7182.91	8154.31	5544.52	8180.98	7121.21	7070.71	7401.04	6725.5	8577.94	7227.76	8999.48	6601.03	5269.3	7969.5	8547.92	8235.81	7464.06	5678.98	6426.01
GSTO1	12317.6	11212.6	17042.4	12621.2	11045	11556	13459.5	12435.3	11572.4	10848.5	9081.09	14503.7	9413.41	9505.96	10499.2	8787.69	12634.1	10665.9	12200.1	9587.09	10585.6	13207.2	9521.11	9993.47	10611.1	12576.4	11626.6	11249.2	13510.4	11497	14029.1	11029.3	14156.4	11846.2	13620.3	10714
GSTZ1			1653.31		1147.61		1284.9												206.9		455.714	550.333	483.361	941.718		617.52		822.076			482.772			183.525
GTF2I	18379.8	17876.1	17633.4	17042.7	17467.8	18263.1	19229	19125.9	18818.4	16404.4	17701	18019.9	18509.9	17537.9	18110.3	17039.8	19188	17713.8	21038.9	15799.5	16864	16021.2	16480.4	16592.5	16314.2	18356.1	17478.8	16919.9	17791.8	15457.8	18857.1	18902.9	17743.2	18136.7	16745.3	16348.4
GTF3C1	1729.88	2035.79	1761.14	2060.59	1611.89	1955.07	2033.98	2027.84	1972.59	2023.35	1168.84	2153.16	2144.63	2004.66	1815.82	2470.96	1803.91	1643.67	2156.46	2572.03	2062.34	1936.4	2208.56	1805.5	2376.68	1826.44	2104.29	1298.97	1912.19	1444.03	2043.53	2356.97	2389.74	2020.28	2785.2	1505.61
GTF3C3	2196.35	2651.25	2405.87	2595.72	1921.05	2622.21	2282.59	2195.25	2859.01	1677.64	2202.29	2693.97	2372.44	2765.78	3134.76	2807.73	2793.39	2461.23	2313.97	2604.54	2316.64	1917.04	2223.63	1867.84	2264.6	2362.48	2517.99	1457.4	2289.41	7132.61	4189.27	2613.11	2596.47	2761.43	3298.54	2410.56
GTF3C4	1494.91	1220.44	1167.71	1172.48	676.754	1174.07	1583.8	1581.45	1387.01	1369.42	1298.45	991.637	1474.22	1733.73	1567.04	475.818	1907.4	1496.88	1716.22	1159.1	1509.61	1285.64	1309.56	1278.48	1019.05	1851.93	2191.64	1546.07	1294.31	1237.75	1604.53	1581.42	1810.67	1694.14	1624.6	1458.51
GTF3C5	2969.49	2908.58	2170.24	2939.02	3017.37	3038.8	2686.93	3240.95	3108.3	2900.34	2677.6	2706.9	3273.64	3008.09	3216.27	3812.77	2910.14	2674.66	3015.51	2701.68	2715.12	2875.58	3162.14	2237.1	2980.13	2648.48	3119.28	3465.29	2865.18	2833.75	2667.44	3404.18	2723.67	3461.64	3245.84	2934.71
GTPBP4	2876.07	2294.73	1850.79	3066.38	2767.04	2349.66	2621.45	1998.1	1942.79	2335.72	2804.65	2709.78	2693.39	2492.51	2554.8	2362.4	2570.87	2910.71	2542.5	2358.73	2294.44	2003.62	2078.06	1782.92	2102.41	2470.69	2008.08	2560.68	2363.79	3014.86	1448.03	2203.18	2570.64	2187.86	2497.08	2456.88
GUCY2F	3852.42	2128.52	1763.98	3663.13	2846.35	2618.55	3319.39	2672.39	2522.93	2302.38	3504.15	3883.4	2847.59	2613.57	3320.31	4096.58	2845.28	2850.94	3042.04	4002.7	2208.99	2161.85	2906.51	2999.97	3679.78	2760.94	3613.49	1413.37	2921.67	1328.93	3418.11	3322.45	3469.06			2638.46
GYG1	2020.07	2655.62	1991.02	1996.68	1642.27	1382.88	2041.01	2178.24	3528.23		3145.88	1537.91	2364.08	1893.88	2657.16	1727.04	2213.83	2796.08	1981.11	1829.61	6832.73	2712.86	2616.1	1549.92	2722.17	2228.03	1923.58	3027.66	2696.4		2750.18	2911.02	2438.64	1846.76	1774.44	2931.54
GYS1	2932.84	3196.65	2927.61	3650.6	2831.15	3019.64	2559.03	3306.69	2460.2	2983.52	2622.83	1885.37	2099.36	2004.84	2614.87	2594.8	2235.02	2180.5	2736.64	2089.31	2779.79	3208.41	3380.01	3031.33	2643.84	2099.96	2662.13	2712.78	2720.79	2005.13	2735.37	2815.64	3071.56	2785.97	2511.04	2415.2
GYS2	2570.68	2830.87										2633.75								2016.2							2549.15
H1-5	4996.06	2041.07	7190.7	2636.27	6452.33	3398.5	5441.92	2239.91	2895.59		4097.74	5301.21	3918.34	3682.16	3118.58	7313.09	4437.94	4481.55	4165.86	5325.02	4562.02	3139.09	5841.72	4300.06	5898.01	2011.35	4273.95	1647.9	3918.75	4685.66	3519.76	3928.09	3494.78	4238.12	2754.06	3061.12
HACD3	5362.82	3988.29	2237.27	3949.04	2570.16	4189.91	4097.1	3955.28	3545.01	3346.74	5133.28	2638.74	4468.05	5851.97	3517.27	2405.12	4841.3	4524.81	4877.43	3369.18	4843.34	5282.54	5103.95	3770.97	5292.68	4424.53	4912.32	5233.36	4756.96	1317.74	5378.31	4157.33	4509.35	5220.29	4706.02	5336.62
HACL1	1555.22	1265.34	3143.9	1906.14	1506.07	1955.65	1914.16	1560.34	1304.08		2278.68		1266.77	1686.28	1499.49	1442.56	2077.16	1855.22	1969.68	4411.68	1472.66	1544.9	1967.42	1656.42	1557.19	1491.76	1460.74	1844.48	1449.05	4621.75	2988.9	1410.99	1984.69	1359.81	2039.71	1674.33
HADH	17533.5	16060.5	24565.1	19262.8	18059.3	13722.4	19078.4	18232	12829.7	15538.3	10221.5	17187.4	15351.4	17751.3	12975.3	18456.5	11444.3	15816.2	15993.3	15604.8	14968.2	17035.1	23219.5	23198.1	18104.6	16490.9	16853.4	18323.1	13618.2	16299.3	14196.1	15226.2	18602.4	14139.4	18417.2	15569.6
HADHA	9209.86	9529.34	8481.77	8856.34	6737.15	9989.58	9053.04	9157.84	9058.99	6915.29	8799.13	7177.4	9410.33	9606.81	9421.06	7641.78	8876.32	9639.67	9569.54	8426.52	9811.06	9331.37	10170.4	8839.52	9286.55	9626.53	8849.02	10180.4	8299.37	6645.62	8646.67	8746.6	8272.77	9968.64	9745.2	8995.27
HADHB	23942.5	23499	20354.9	25336.4	18600.4	25889.9	26251.3	26148.7	25898.6	24829.3	22798.6	17642.7	23251.3	22532.1	21113.6	18342.3	22664.7	22017.3	22687	19048.4	21444.4	26037.5	19525.9	19902.8	20134.2	22891.9	24597	20620.4	21669.6	15212.8	26223.7	22329.9	21404	25007.3	21719.3	23482.5
HAGH	1331.24	980.799		1078.38	747.279	976.69	1013.75	1499.05	1033.31	787.2	910.604	1196.16	1026.42	1014.75	1176.7	1414.14	871.613	1054.94	1014.55	1640.79	1020.06	1399.7	1036.52	1178.21	1046.51	872.678	972.567	949.531	1254.19	972.482	889.212	868.975	980.406	982.438	1096.35	1137.92
HARS1	5908.54	9062.41	6293.34	7999.54	6448.42	9092.29	7474.76	8944.69	9245.92	7562.58	6396.19	6508.2	7702.31	6072.86	7822.06	7162.21	7405.99	6310.03	8621	6987.27	7710.34	8424.03	6483.7	7759.61	6267.97	7466.85	6304.07	8020.92	7750.71	6116.15	7538.48	8330.54	6829.76	6689.78	8495.66	6419.38
HARS2	3444.43	3943.84	4980.44	4898.73	3814.2	5137.2	4333.13	4114.86	4235.5	5550.73	4542.51	3512.55	4521.15	3906.32	4606.07	4380.11	3781.67	2906.83	4089.26	4638.34	3708.3	3488.98	4544.57	4565.73	4267.29	4600.34	3430.83	5157.8	4288.01	5297.49	3679.84	3318.13	3291.76	5362.72	5343.33	3307.65
HAT1	10296.8	10298.3	7526.94	9722.48	8637.52	10973.7	11318.4	11425.3	9945.76	10491.7	11085.1	8422.57	12067	9560.47	12672.6	7824.39	10690.5	11463.3	12448.9	7598.56	10538.4	12752.2	11559.6	9634.1	10952.5	12968	11289.6	11215.1	9622.44	8065.85	11750	11219.8	11973.6	11316.3	10921.7	11501.8
HBA2	1735.7	2054.68	3457.35	1345.23	872.133	1604.86	2159.6	1633.2	1402.49	925.963	1475.26		661.307	1948.22	1185.23	1956.49	1955.48	1756.78	1885.49	2449.69	1476.57	1660.25	2005.55	1781.43	2624.11	4220.74	722.301	1814.12	1687.67	4131.75	2081.21	1629.95	2633.76	1160.4	2348.17	2903.4
HBS1L	1007.37	1412.13	393.321	1215.32	513.311	896.87	603.157	888.859	1145.93	1012.41	671.377		647.732	1169.19		800.714	663.154	930.435	637.076		869.775	838.057	996.01		612.977	1116.63	965.212	1314.3	797.528		913.004	1138.16	862.83	1287.66	1386.49	819.567
HCFC1	5519.52	5840.75	6571.23	5827.42	6662.18	5417.14	5691.39	5429.02	5597.85	4647.92	5759.66	6400.76	6125.8	6222.9	6016.27	6013.16	5222.57	5653.46	5702.8	6072.39	5868.86	5534.26	6151.82	5796.03	6102.49	6088.28	5928.7	4992.55	6502.48	7507.43	6247.14	5474.76	5957.79	6324.48	5264.28	5471.62
HDAC1	983.776	1552.64	2290.66	1797.79	1713.78	1656.62	2003.77	2179.49	1899.13	1570.07	1513.33	2832.88	1862.22	1634.07	2310.63	1849.74	1290.59	1715.03	2453.08	2608.77	1919.01	2618.49	1561.65	1435.46		1879.63	1529.15	1526.77	2039.68		1618.15	2014.82	1525.33	1793.5	1185.6	1516.27
HDAC2	2517.22	1984.06	2562.67	2732.14	2314.93	2600.71	2242.23	2201.88	2601.25	3550.88	2521.63	2007.11	2067.02	2408.41	1905.42	1428.53	2225.87	2580.34	2724.83	2741.69	2931.89	2607.66	3048.46	2502.69	2092.13	2422.32	2686.31	3352.91	2228.01	1757.29	2602.58	2735.73	2565.64	2259.14	2616.19	2229.67
HDAC3	1736.41	1432.14	1978.57	2099.42	1916.78	2451.22	1242.28	1815.78	1873.15	2155.55	1603.47	2085.71	1863.25	1729.61	1497.21	1752.89	2122	2086.11	1571.54	1478.98	1544.47	1688.74	1100.01	1612.01	1579.66	1391.23	1462.28	2559.15			1608.23	1645.97	1219.95	1621		1720.58
HDHD3	774.043		1478.17	230.188	984.982		645.632		560.219		317.887	575.126							467.286		516.324	474.975	1396.38	1476.22		804.361		455.786	381.099	452.277	473.226		615.146	300.893		285.193
HDHD5	7422.54	9057.06	11060	9168.34	8480.62	7285.31	7776.05	6525.37	6259.77	7241.11	6385.73	5867.67	7344.29	9292.54	3770.97	6901.8	8199.01	7586.74	8106.32	7302.22	9513.31	9618.88	10008.2	9632.9	7536.21	7743.14	7059.55	10532.5	9263.92	10678.2	6514.64	8835.79	9200.57	7084.94	7050.61	7921.76
HDLBP	5811.02	5687.82	6316.56	6821.28	6160.01	4670.3	5882.64	6863.36	6094.95	3987.62	6040.51	6120.48	6551.5	5247.51	6157.93	6007.78	6513.36	5293.42	6622.74	5268.15	6932.13	5974.16	7241.58	6557.22	6912.23	5675.86	5205.68	3870.04	5679.16	4855.97	6574.54	5734.97	7159.44	5608.64	5943.86	6117.45
HEATR6	1036.14	769.853	1181.65	1301.37	906.689	637.729	1515.1	1502.27	2004.92	1004.19	1079.64		1095.01	1287.86	1159.6	946.712	744.549	1503.42	894.421	1726.26	1481.01	1003.17	2345.2	1602.51	1643.81	1093.93	1010.94	1213.27	1544.49	1166.9	1144.77	931.654	835.442	924.726	1118.98	896.244
HEBP1	1420.51	551.311	1727.02		640.253	372.644	1408.57	565.863	810.013	1071.05	1223.68	1454.48	1209.4	1035.6	1259.06	1384.33	1019.07	855.429	1442.71	730.289	1036.26	835.158	1622.91	869.986	1065.69	556.511	465.478		1020.23		1423.37	859.713	982.947	988.179		1228.71
HECTD1	2555.51	3326.56	2065.36	3609.27	2071.55	2900.22	2459.26	3037.39	2028.54	2415.42	2417.92	3055.33	2984.37	2272.17	2955.9	2361.31	1980.5	3221.88	3176.32	2582.18	2904.17	2545.73	2700.75	2824.43	3130.85	1519.09	2718.82	2299.91	3558.05	4366.24	2336.64	3054.75	2260.78	2907.86	2328.67	2883.02
HERC1	1131.9	853.225	754.351		859.908	661.306	548.571	861.964	764.47		442.672	2011.42	1233.13	1048.83	910.937		1165.2	1388.51	673.033	671.183	1105.93	1194.28	1169.68	643.391	1330.67	842.016		688.293	766.986		626.73	843.893	807.03	802.714	752.435	697.566
HERC2	2447.38	2057.46	3268.03	3260.94	1402.71	2369.39	1971.02	2244.55	1801.73	1341.57	2308.37	2344.95	2210.29	2769	2224.88	2073.08	2090.29	1489.86	2039.73	1948.57	2189.43	2160.18	2379.65	2664.48	2763.68	1925.46	2525.16	1870.5	2718.68	3570.96	1630.06	1061.68	1840.7	2382.53	2651.13	2476.79
HERC4	1942.46	2319.72		1225.99	1068.05	2208.9	1761.66	1920.65	1465.28	1568.02	1873.72		1485.25	1725.09	1685.81	1006.66	2244.2	1576.76	1644.71	1020.67	2006.36	1520.8	2070.79	1216.99	1793.37	2180.49	1405.12	1429.58	2282.1		1165.97	1346.24	1461.23	2095.36	1408.85	2204.17
HEXA	2230.38	2347.99	4042.3	2326.32	2321.64	2938.75	2369.01	2379.57	1983.71	3236.86	2683.29		2224.53	2218.12	742.871	2142.68	2024.72	3279.75	2970.94	786.482	3000.86	4138.61	3745.74	2749.9	1700.36	2825.87	2511.51	3687.43	3057.43	3194.91	1995.74	2342.58	2346.17	1097.4	2232.35	2520.23
HEXB	1857.5	1509.75	2782.69	1288.05		1895.2	1856.79	1384.47	2071.68	2089.66	1753.86	2407.73	1507.39	1320.9	2861.09	2064.8	1120.86	1173.07	1007.73		2417.96	2162.82	1662.65	1785.31	1115.97	1880.63	1124.34	1422.67	2475.62		1834.49	2753.65	1470.18	2221.24	1456.59	1080.35
HGS	1081.58	992.515			1068.66	1059.64	926.328	695.315	861.466		1729.73	1393.2	1398.35	1055.8	1222.44	1036.51	1145.32	818.657	1126.02	1519.52	910.794	839.689	1422.99	1015.94	1823.99	590.239	1221.67	1022.84	1443.08	1125.13	886.881	1212.44	600.167	749.145	1000.81	1322.77
HIBADH	2600.14	2238.17	3288.12	2025.38	2098.29	1589.02	2567.59	1946.67	1762.88	2247.34	1959.41	1803.88	1786.39	1527.26	1843.63	1390.97	2018.68	1638.41	1882	1406.04	2180.98	2116.45	2609.77	1841.05	1813.93	1915.31	2110.18	1646.25	2022.44	1550.96	1621.49	1966.69	1659.81	1754.69	1697.27	1755.44
HIBCH	408.718	405.802	652.071	707.565	431.295	415.054	623.038	393.439	430.455	699.61	731.637	745.179	562.834	393.519	352.307		460.919	519.257	754.888	890.154	706.442	740.344	300.297	602.728	659.968	776.718	417.955	829.103			395.457	319.21	461.279	402.202	644.895	395.806
HID1	1324.84	1664.88	300.656	2041.29	2553.63	1127.49	1412.4	1841.65	1214.14	1131.24	1111.86		1485.12	1413.13	1585.2	1800.85	1256.68	1993.14	1672.26	1096.2	1535.71	1685.43	1659.91	1446.63	1355.66	1235.89	1280.4	1462.91	2096.3		1477.13	1688.06	1858.58	1369.12	1185.85	1269.45
HIKESHI	2351.37	2476.82	644.952			1933.81	2173.17	2088.36	1670.15		1424.95			2296.58	1741.49		2226.9	2359.52	2212.76		1784.39	1700.73	1870.6			1530.69	1971.97		1337.63		2240.77	2787.83	1713.92	2532.9	1474.2	2266.16
HINT1	946.446	1270.46	2138.88	769.449	1944.27	796.7	1400.28	1160.11	945.257	762.549	1495.24	1788.05	972.058	1344.1	1866.23	1914.58	1397.01	1088.18	1173.17	1478.16	1331.54	1271.06	1486.41	1447.53	1563.09	1521.25	1124.68	982.404	1267.28	1524.4	933.782	1074.86	936.517	1117.42	1445.63	1179.41
HINT2	927.512	665.928	1994.64	2070.97	2261.5	753.656	1434.88	1233.01	1055.98		1182.95	1490.2	1123.73	449.973	1373.11	961.771	921.048		2202.69	952.294	825.498	910.848	1542.61	1365.07	1427.71	1168.28	1758.15	601.912	1595.17	1263.64	748.596	857.742	1034.13	693.387	518.956	1050.27
HIP1	217		795.527	206.821	634.517		1046.96				397.926		91.5996				195.676		123.159		493.849		1182.94	614.462	427.782			201.42	420.859		415.175		535.826
HK1	8937.28	8800.17	5185.88	8416.01	6479.17	7289.1	8098.89	7619.86	8016.55	6752.64	7613.12	6464.17	8415.68	9034.88	7773.34	7497.23	8169.44	8398.71	7814.52	6622.48	8625.61	9001.32	8345.17	7569.87	7758.9	8967.28	8748.32	8622.69	7565.91	6500.86	7926.76	8571.16	8639.34	7795.32	6559.47	8605.03
HK2	1562.9	1595.56	1704.2	1772.47	1321.79	2003	1597.63	1544.11	1784.05	2199.71	1510.28	1797.23	1863.82	1756.52	1671.41	1794.21	1219.63	1575.71	1515.49	1649.28	1861.17	1650.11	1485.78	1761.46	1746.47	1831.22	1720.66	1320.11	1730.62		1694.07	1405.81	1677.86	1508.26	1372.17	1855.79
HLA-A	699.218	305.042	354.284		452.462		900.727	132.607	227.882		389.306	448.876	247.885	406.643				186.834			454.89	208.82	410.847	550.998		201.048		548.27	613.113		303.951		935.582			445.694
HLA-C	2848.75	3300.39	3213.24	3524.51	4320.48	3283.18	3249.82	3535	3189.9	2189.77	3306.67	4096.71	3806.98	2658.27	3331.08	3444.47	3465.57	3045.12	2847.75	4342.94	2721.77	3544.93	4284.01	3260.51	4008.19	3186.28	4054.79	2773.85	4883.07	4408.69	3245.14	2562.29	3419.47	3039.77	3125.96	2860.02
HLTF	4399.34	2785.96	3642.86	2508.92	3638.73	3747.28	4811.48	3717.11	4339.18	3509.01	4408.08	3597.13	3636.3	4045.11	5286.03	2915.36	3499.05	4275.99	3730.5	4969.46	3598.98	3823.88	2762.9	2790.05	3149.22	4375.34	4120.63	2458.73	4816.7	1882.49	3798.54	4229.61	6094.89	5660.44	4647.14	3475.2
HM13	4102.88	3242.38	3558.17	6741.08	4595.04	3555.97	5157.65	3467.28	5273.1	6143.6	4856.59	5781.09	3745.31	5182.18	4437.64	3706.46	3904.78	6256.31	5517.08	6504.55	5324.08	3491.99	6113.39	4560.11	5252.54	5492.89	3684.8	4152.64	5963.88	4932.89	4296.48	3642.91	5457.69	3499.68	5368.33	5196.99
HMBS	3234.09	2989.1	3196.31	3387.32	2779.41	3647.45	2995.75	2153.36	2986.77	2512.79	2522.78	3312.15	3199.69	2198.67	3341	3120.48	2394.43	2460.68	3056.55	2017.84	2772.87	2391.68	2444.84	2881.43	2349.16	3568.2	3004.58	1829.69	3505.47	3244.42	2340.68	2783.95	3064.71	2640.1	3709.93	2904.56
HMCES	2958.93	2567.52	2924.15	2757.34	3080.36	2396.08	2259.08	2565.28	3272.13	3741.89	2457.4	2207.37	1961.39	2724.29	2369.03	2394.93	2652.62	1944.86	2215.95	2555.74	1682.41	1509.65	1779.74	3116.81	2569.46	2105.28	2387.68	2439.16	2819.35	6552.96	2605.47	2130.23	2198.27	3420.33	2621.02	2386.42
HMGB1					135.43	476.672	1074.63		311.247		1198.15		757.719		307.082			756.296	812.802		651.803		613.973			650.881			777.565		249.718	539.143	370.715	855.01	1169.56	561.826
HMGCL		313.876		510.401		228.628	344.389	546.643	450.142		443.648	465.54	513.288				620.588				643.803		548.728			594.243	785.422	293.892			669.107	542.227		360.451		625.959
HMGCS1	6841.35	5013.46	8428.26	6327.24	9125.72	6685.96	7640.83	5180.66	4316.15	7648.61	6521.35	7063.36	4623.96	5472.69	8280.36	8270.26	4442.11	3983.16	5773.48	6767.26	7294.29	6060.7	7880.65	7473.04	8304.15	6168.54	5293.43	6841.28	6145.56	11277.8	5631.6	3997.41	6074.85	4720.61	5842.81	6609.98
HNRNPA0	3028.01	3255.75	3472.38	3343.17	3309.92	2250.3	3395.06	2242.15	3211.2	3310.09	2936.85	2633.13	2866.57	3096.98	2279.63	2474.81	3011.54	2759.58	2951.48	3235.13	2682.32	3648.24	3418.62	3337.07	2848.24	2674.58	2846.86	3313.37	2604.65	4952.5	2974.81	2274.73	2679.26	2525.97	2761.92	2454.32
HNRNPA1	5553.38	3717.81	8393.47	3258.61	7077.2	2852.53	5045.67	4220.46	4516.11	5189.87	5539.53	10490.9	7226.35	5402.17	5805.86	8810.32	6649.77	5875.63	5844.21	6450.17	5432.51	2774.42	5135.41	4026.88	6261.41	3076.28	6475.89	2689.65	5057.46	4673.41	4081.44	4084.59	3788.92	5215.29	2874.33	5620.54
HNRNPA2B1	35927.6	15363.3	50776.2	20662.3	49848.7	15134.3	44037.3	22315.4	22726	14544.1	36442.6	46120.5	35875.2	32955.1	35337.9	37788	32426.8	31554.2	25781.1	29439.7	31178.1	21172.1	34461.6	29676.8	33530	21885.8	28747	14132.6	31734.9	21497.2	30394.2	24987.8	29199.6	33435.8	20208.4	41271.4
HNRNPA3	3437.91	2090.6	2416.94	2606.94	2274.97	3463.59	4423.32	1947.18	3280.61	1378.33	2399.44	2906.8	3821.47	3362.03	1944.96	1742.82	3503.4	4838.25	3827.43	1856.3	3942.99	2560.92	3089.71	1957.4	2544.37	2017.26	2659.04		2600.56		3198.11	3857.45	3733.62	3230.28	1392.53	5284.39
HNRNPAB	6309.2	873.173	6123.58	1918.82	8193.73	1124.03	8578.34	3127.88	4098.5		6364.25	8234.61	7381.13	6159.69	5368.59	6242	5933.24	7081.05	7077.42	5846.79	6477.07	2588.08	7034.79	3549.57	6372.13	3868.02	5425.65		4797.39		6684.62	4941.73	5741.48	5208.17	2333.73	6687.66
HNRNPC	7232.07	5615.01	6820.9	5553.96	7948.23	3774.16	8906.9	2531.67	4662.19	3825.68	7328.17	5394.83	6991.19	6939.19	4738.66	6076.53	3416.42	3561.23	3266.64	3836.07	6697.21	6015.88	7747.49	7172.17	4922.83	3660.99	3383.75	5153.66	4399.7	6322.91	4814.14	4193	7225.63	6019.15	4608.66	6544.78
HNRNPD	11848.9	3640.99	16224.1	4419.37	16402.1	4309.3	13885.2	6907.59	8193.83	3555.66	12785.8	14637.8	11913.3	11551.6	10555.7	12419.3	10068.9	11714.4	9417.06	11286.6	10919.8	5140.04	9802.38	6862.16	10591.6	6102.27	6420.88	2519.86	10199.6	4462.39	10482	7674.44	8704	10494.9	4362.94	10864.2
HNRNPDL	1184	181.055	801.029	308.693	1014.02	571.474	1881.89	483.036	965.391		1317.45	1985.28	2011.06	1227.64	963.452	585.582	1348.09	1247.91	969.143	1037.13	832.751	707.478	1572.66	1136.59	1767.55		1191.57		1067.78		1311.8	1128.72	590.061	1027.08	283.913	1324.84
HNRNPF	4674.59	5138.57	4433.1	5097.35	5018.17	4681	4922.19	3467.23	3411.27	7587.65	4419.7	3152.68	5348.95	3921.73	4645.81	3810.46	4465.38	4849.97	4593.58	2891.15	6219.56	5263.86	5643.88	5206.94	4750.67	4160.66	3603.36	6447.8	4106.98	4568.26	4630.59	5169.96	5351.31	4191.51	4232.39	4804.82
HNRNPH1	25725.3	25091.3	22851	27991	32202.6	25933.1	32720.4	30111	28540.2	39208	29267.3	33097.3	26093.8	26562.7	31748.7	33780.6	30542	25069.2	25566.1	39733.9	30111.2	20406.9	27709.1	26814.1	29991.2	25246.7	27806.5	22168.7	28781.7	22102.2	30577.8	23827.6	24404.1	23159.3	16896.9	26322.6
HNRNPH2	14510.3	13247.9	11784.5	14683.1	11391.5	15089.3	13139.6	15377.7	16959.5	17782.7	12340.5	11431.7	11050.1	11182.1	15526.8	14120.9	15639.4	11339.8	12833.2	16120.9	10533.9	11530.9	10708.4	9111.83	14959.7	15394.2	10157.5	12547.6	14680.1	15101.6	14871.6	12910.8	12741.3	12177.3	12073.7	9818.84
HNRNPH3	4256.84	3241.98	4922.94	3267.08	5390.78	3446.72	3600.27	3268.48	2623.31	3190.73	3393.04	3038	4409.1	3553.82	5480.82	3185.62	4229.5	3309.21	3684.83	3413.4	3653.71	5029.28	3073.54	4358.89	4413.86	3061.65	4803.62	2332.28	3667.08	3106.42	3399.84	3620.94	3341.4	3011.77	3170.65	2865.16
HNRNPK	25172.1	5970.03	22799	9507.59	26490.1	8020.59	27760.9	18807.2	22752.6	6316.44	22896.4	23375.5	21365.5	19851.6	25703.3	17267.8	23730.3	20297.5	21320.9	16336.5	23146.4	11242.9	20672.9	14775.8	19572.7	16958.4	17200	3219.15	21952.5	3976	23576.8	20633.6	18025.1	22961.7	8199.3	22055.8
HNRNPL	10925.7	5164.57	10649.2	6189.85	11739.2	5179.32	13614.8	6232.16	11832.1	4096.77	13851.6	15717.2	13783.1	13612.8	11251.8	10558.6	11659.1	14936.9	11931.1	13600.4	10943	4867.75	11286.9	6163.32	12225	6776.3	13394.7	5000.45	12111.8	5233.04	9671.67	10113.1	10846.7	10724.8	4960.5	14394.7
HNRNPLL	767.842	914.199	1477.19	943.616	820.353	996.302	899.792	946.458	711.214	527.36	885.87	1079.3	921.144	1186.56	965.788	1667.98	646.752	637.75	1255.51	1064.82	931.95	786.232	884.728	457.506	1006.16	581.445	1374.51	943.856	575.223		804.65	907.628	941.755	781.936	913.347	1011.83
HNRNPM	25329.3	25003	26384	22700.2	28143	23993.6	30799.1	24962.2	24723.9	17129.7	25257.8	28880.8	30894.6	24340.4	29083.4	26379.3	31049.8	27237.6	32529.1	29767.2	30187	23697.6	30950.4	28031.9	24806.2	22775.2	23654.3	19160.9	21442.3	26654.2	27970.1	29254.2	23435.7	24402.3	16142	27047.3
HNRNPR	7163.52	3053.21	7468.78	4791.74	7147.03	3122.39	8259.97	3543.02	4005.53		7857.08	6568.3	8841	7060.51	6672.17	5716.09	8316.21	7664.84	8067.13	5898.39	6959.38	4635	7654.21	4348.6	5541.57	2891.6	7881.14		5604.74		6781.68	5750.14	5314.19	4967.85	2512.89	6561.84
HNRNPU	53126.2	57164.2	37042.3	53837	39301.2	43304.9	49599.8	47941.3	43410.9	38786.4	50093.6	39385.7	62813.9	66440.6	43341.8	37223.9	55615	63283.3	62986.2	49787.4	68977	61857.5	71889.1	60451.8	60941.9	54275	62651.5	58689.2	47742.3	33914.4	44984.8	48636.1	49021.6	50464.9	54173.5	62338.4
HNRNPUL1	7890.78	8695.83	5859.85	8527.39	5018.76	6951.1	7882.45	7235.51	7392.72	7137.66	8318.18	8064.25	7840.25	7584.88	8287.96	6785.64	9005.25	9292.96	8835.28	10266.7	9768.01	10282.6	10738.7	8039.23	8674.94	8100.05	8514.2	8680.11	8424.68	6770.17	8743.77	7541.62	7846.02	8551.96	7917.57	9514.81
HNRNPUL2	3016.42	3184.94	3263.48	4009.54	3461.47	2984.56	3127.17	3046.2	2851.22	3500.91	3671.64	3853.88	2352.85	3637.52	3224.73	3881.75	2702.98	3109.67	3454.81	3578.77	3967.02	3374.31	3858.79	3428.64	3424.69	3614.59	3959.31	3711.98	4025.67	4789.7	3421.8	3233.5	2723.93	3467.12	3015.89	2579.94
HP1BP3	2936.85			3521.45	5027.65	3634.93	3524.97		3469.33		5942.36				4805.58	3453.35	4318.33	4436.05	3706.2	6252.97	571.235	3563.22	602.609	3352.72	4766.4		4418.66		6108.59	2262.99	601.674			4518.52
HPDL	5857.11	7269.95	7379.21	7753.92	7296.23	6341.21	7314.28	5987.42	5500.79	5928.8	6464.81	7518.99	6199.48	6912.8	5658.49	7948.85	6089.09	6046.61	8071.76	5350.88	7510.36	7779.22	8860.35	8258.27	7429.22	7331.76	6718.99	9119.93	6843.76	10680.5	7975.29	7761.73	10148.1	5556.6	7561.65	7646.58
HPF1	243.914	332.043					327.276	575.457			193.412		216.669	437.345			217.989	378.206			438.081	513.657	565.716		524.958			486.122	391.257		342.115	364.287	411.808		217.608
HPRT1	8626.95	9502.97	7322.64	9016.09	6286.56	10692.7	7442.04	8420.98	7942.85	9708.04	6914.98	7627.69	7600.86	7834.19	7738.91	7871.62	10869.9	9206.03	9856.96	8705.82	9200.33	9100.42	8397.74	8918.4	8450	8937.58	8023.83	11685.7	7589.06	5606.62	10640.7	11601	9109.69	7630.78	10026.2	7336.86
HPS6	794.628	607.581	1127.12	1280.88	1808.85	1058.9	754.359	922.119	579.263		683.455		758.671	633.718	864.506		387.453	1013.48	455.732	1510.87	1489.04		1132.63	861.891	1492.86	842.247	1176.76		677.23		573.697	2017.91	999.974	582.964	1764.8
HRAS	3123.08	1593.63	4359.21	3292.4	3523.45	3151.02	2318.79	2505.89	2965.35	3628.6	4030.74	4472.9	3156.79	3255.75	3906.78	4810.31	3196.31	3885.72	2116.36	3699.49	1967.7	1955.76	3363.25	2220.44	3326.87	3271.67	2137.8	1771.82	3465.85		1958.32	2620.58	2102.75	2845.08	1923.35	2744.11
HS2ST1	496.229	508.982		441.566	829.271	391.988	674.427	585.198	727.327		625.715	269.293	617.884		550.098		433.881	416.372			484.371		627.01		662.237	489.876			649.921		1200.21	731.306	603.708		448.491	633.61
HSD17B10	9398.34	8111.62	8131.3	6820.32	5789.11	7128.3	9952.24	7543.54	8199.5	7069.39	9319.32	5765.64	6706.39	7681.24	6188.06	3563.43	6958.11	6567.86	8384.71	5362.39	8053.87	9773.31	7321.39	7355.28	6876.78	9258.14	9015.29	8799.48	9321.62	6262.83	9900.22	8484.42	8747.18	10078.9	8454.34	8858.85
HSD17B12	2146.22	1358.27	2267.99			1851.91	1814.39	1205.46	1268.47		1212.25		1626.85	1322.61	1239.28		1858.98	1138.35	1861.84			2505.41	1851.78	1668.59	2050.4	2252.51	1543.67	1898.38	1686.57		1824.67	1040.66		2040.54		1096.49
HSD17B4	25327.2	30108.3	24695.3	29039	24147.3	21852.5	25134.7	25083.7	24162.3	27394	24486.2	22421.6	27507.9	27736.5	20160.6	16844	23549.4	25201.8	28250.6	25901.3	31529	32644.5	30075.3	36184.9	23293.8	27539.4	26607.2	30224.7	22869.1	25564.3	23119.3	22209.3	26874.3	22395.9	25671.4	27017.5
HSD17B7	343.051	331.675	190.628	517.215			510.307	383.861	281.95		387.711	621.922	338.725				786.961				482.591	897.892	781.983	628.546	696.005	647.223	372.32	327.129	620.486	837.562	815.016	8.12443	711.555	283.19		512.622
HSDL1	2671.44	3089.37	1606.69	2564.28	1020.61	3531.74	2641.76	2689.11	3136.07	3198.91	2639.27		3355.66	3057.07	2268.95	1141.92	2833.14	3127.22	3087.78	1399.16	3197.71	2743.8	2868.01	1153.29	2764.12	4595.84	4340.51	2191.56	3708.72		2360.98	2598.32	2882.59	2580.17	2492.81	2886.91
HSDL2	2328.54	2754.32	3564.07	3049.25	2449.28	2500.62	2700.93	1731.84	2732.17	1105.77	2149.42	2600.5	1727.77	1592.46	2323.36	2077.18	2785.64	2715.61	1823.53	1616.18	3130.25	1372.22	2609.76	2993.02	2551.04	2571.29	1652.57	1820.36	2553.65	2574.74	1654.29	2857.65	2127.92	1751.11	2600.29	1704.43
HSP90AA1	110721	118276	88181.7	111086	87704.9	115202	107118	112170	100183	98387.1	100107	90970.3	110586	112268	108018	88441	102724	105023	112251	96315.8	123395	118066	119380	107020	106840	113076	105977	118521	96503.5	62799.6	110706	112904	116203	101123	108756	107267
HSP90AB1	40019.2	49044.6	36553.5	32460.5	34313.8	51659.6	42680	30726.8	37029.7	51003.1	36945.1	33358.7	38039.9	36467.2	44017.5	32200.7	36751.5	33359.3	42543.4	30380.3	54073.8	47673.6	62666.9	54453.9	34111	38069.1	32904.2	40799.9	41739.8	28405	41268.2	38199.1	46722.2	37174.3	39744.5	48722.8
HSP90AB2P	6055.49	8347.39		3869.83	3428.14	1858.64	7799.57	1579.81	3251.53		1949.91		2343.64	2360.05	1591.98		2037.71	5071.68	4435.65	1284.15	7938.65	6605.8	4505.58	3476.81	1231.8	3261.86	4340.33	9453.68	1953.01		3709.75	2809.23		3114.66	1324.8	4868.95
HSP90AB4P	1409.26	1037.76				1825.87	2079.44	1305.6	2301.29	932.906		824.163	615.075				1667.99	1227.35	1364.17		806.148	1092.41			826.411	1027.74	915.045	730.951	677.479		3592.64	2998.75	2264.47	1799.59	966.668	1584.98
HSP90B1	116375	130681	78990.1	121831	82381.7	105574	110873	113502	116865	97295.5	92469.1	80895.8	109410	109366	86438.6	80743	102816	103347	117922	91156.1	128581	131673	120618	123826	106396	103220	105272	117017	97312.5	68060.2	125307	134291	129114	119551	114105	122791
HSPA14	3254.75	1686.49	10845.9	1755.14	6770.31	3462.84	4737.78	615.962	767.188		1319.82	3271.39	3043.96	1797.46		1120.7	216.037	1180.86	2902.19		4349.1	3874.54	10492.3	7497.2	2840.34	3279.13	2360.05	3080.05	4515.48		1682.83	2245.34	2664.84	2622.59	1858.78	3661.03
HSPA2	4322.27	3239.84	3593.29	3057.82	3120.39	4222.48	3431.97	4222.75	4153.34	2867.19	3654.46	3513.88	4208.98	3243.27	4778.91	6097.62	3839.59	3230.25	2794.98	5492.14	2950.44	3096.14	4012.31	3405.52	4900.34	3030.04	3741.95	2464.73	2934.9	2999.51	3582.66	3974.71	3286.77	2979.1	3918.49	2554.43
HSPA4	21654.9	22604.3	18180.7	22378.6	18433.7	18134.6	21454.1	22237.1	22632.4	20657.3	21490.7	19275.2	21095.1	21188.7	21387.5	17823.9	18645.2	20529.1	22011.5	18422.8	22681.4	21904.3	20808.5	20542.5	21706.5	22547.2	19698.7	20663.6	21037.4	12084.2	22100	20582.5	22220.3	21533.9	19543.7	20631.7
HSPA4L	14538.3	15435.6	11022	13534.7	13516.7	15283.4	14279.3	14830	14098	14677.4	13533.2	13779.1	13075.4	13881.8	13782.4	11799.8	13365.7	11814.3	11968.7	9580.42	14242.2	13449.7	12260.1	12023.9	14241.7	15696.9	13388.2	14405.1	12764.2	18065.7	13379.2	15139.4	14554.3	15176.3	13797.2	14021.9
HSPA5	47971.3	42864.7	45118.8	41469.4	47748.4	35308.2	47466.5	40720.9	42163.7	28227.6	44560.8	47048.6	50630.4	45490.2	44950.8	41784.4	47318.6	41792.2	44742.2	47317.5	45579.3	39540.1	45666.4	44005.5	48202.2	41508.5	43159.7	32012.1	42919.8	31112.8	51008.6	55509.4	48692.8	45160.5	36016.1	47879.6
HSPA8	106850	92152.8	97388.7	101640	103943	81996.3	105037	97610.1	92472.6	68925.8	100437	120424	102505	98224.7	104029	117543	100885	103123	103081	102912	111769	89229.5	114419	115134	115008	101502	101283	68090.2	93312.3	73540.8	112750	115112	110844	97077.1	88265.2	96247.5
HSPA9	75880.5	61814.7	65860.8	54894.3	77399.8	57966	75414	63460.1	70561.8	46838.6	67168.1	79285.5	69253	61315.7	70370.5	80951.3	65950.7	61544.9	70034.4	63088.6	68278	57826.4	63110.2	61945	66857.5	65657	53876.5	39474.1	67053.3	61081.7	77785.5	68945.2	72001	70316.5	46294.8	56464.9
HSPB1	113515	101308	104414	100988	133451	81684.5	110166	87028.1	95206.3	76867.9	110685	100134	109182	105869	105762	107407	91688.3	95190.8	121215	119480	122004	104640	110864	117148	111100	86062.4	103225	92850.9	103949	149941	106332	105535	122070	114980	100058	117947
HSPB8	3671.55	4010.88	5260.28	3966.61	8791.87	7557.55	6474.37	6392.85	11869	10311.7	2995.1	4107.85	3124.54	3207.33	4261.34	4962.05	5472.86	5404.98	7963.46	12893.9	2254.04	2531.64	3394.01	4243.9	2842.36	2442.4	3715.01	5335.41	3010.29	11556.5	3221.6	3902.57	3161.54	2441.66	4085.07	2191.28
HSPBP1	2278.94	3122	2311.56	1123.9	2697.49	2898.61	3572.48	2749.3	2624.26	2655.77	2690.31	1954.68	3587.44	2086.77	2637.19	1818.75	2605.79	2823.46	2577.32	1564.54	3067.65	2840.62	1934.8	2381.41	3358.69	2137.92	2946.47	2948.97	2773.3	2619.27	3609.17	3448.18	2663.07	3457.95	1869.62	2611.34
HSPD1	47392.5	37217.6	50313.8	31216.4	59506.5	28285.5	50000	32970.1	32165	15582.4	55030.4	61317.1	61051.9	44207.8	53943.8	51965.7	49857.9	44498.7	45654.3	42242.8	49888.3	40786.5	54003.2	54843	47622.4	37157.1	37596.3	20638.3	36077	30898.6	54479.7	39135.9	40744.1	41480	24266.7	52408.1
HSPE1	10003.8	3152.53	10861.2	5540.93	13171.1	4103.7	14627.3	4549.84	3847.79	3126.42	8795.68	15539.6	10978.2	8875.72	9207.4	11959.9	9174.1	11181.7	6730.9	7545.35	8096.6	2630.05	8176.14	5242.32	7305.76	2830.76	6326.14	2962.27	7149.11	2527.45	9740.35	6977.44	6188.83	6141.72	3739.11	10184.8
HSPH1	28161.5	28872.6	21896.5	31547.2	27445.1	29439.4	32464.4	29025.9	30695	27452.6	27308.6	28973.2	26907.5	27134.7	25975.2	29047.7	27497.8	27346.5	28475.6	27139.6	29986.7	28082.5	29706.4	28829.5	25860.5	29544.6	28166.2	28327.5	28186.8	23981.4	29948.7	29304.4	31709.9	30267.9	24641	28045.4
HTATIP2	3659.11	3298.3	4042.25	4293.62	2377.82	3406.04	4450.26	3353.01	3346.47		2361.38	5678.47	3005.66	3596.93	2743.54	1882.54	3100.89			3331.14	2721.31		3340.44		1515.33	2667.23	2996.46		2852.56		4531.27	4124.85	4323.43	3224.41		2691.61
HTATSF1	4986.17	3502.43	3849.98	3068.7	3355.73	3632.04	5353.12	3587.71	5174.44	2758.53	5796.78	4596.8	3423.86	4373.97	4821.56	2409.51	5074.52	4533.22	3542.46	2713.85	4158.41	3416.21	4422.97	3271.74	4418.2	3437.36	4637.96	1739.75	4742.47	1243.23	5546.86	3915.34	3428.04	5279.63	2268.82	4760.21
HTRA2	783.255			1033.11		866.712	600.967	687.774	818.481		1079.29	944.043	1201.83	898.301	1434.53	1077.09	558.279	887.128	615.134	1591.95	821.966	478.689	813.499		882.456	590.783	313.233				777.922	621.765	860.472	693.867	581.65	925.692
HTT	658.076	623.823	1697.61	440.759	957.896		696.805	428.125	658.572		687.481	572.246	614.941	576.61			1357.17		473.41		792.05	560.503	643.257	581.331	337.844	594.442	1097.84		809.305		394.445	268.539	628.7	464.199	902.01	763.934
HUWE1	10095.9	9207.39	8462.32	9614.06	8251.94	8087.56	8823.85	9265.55	9939	10212.7	10410.3	9001.59	10576.8	11190.3	9989.58	8975.79	9721.74	9838.81	10160.9	10447.5	10583.3	10086.9	10755.2	10572.4	11333.9	9573.22	12009.4	9462.11	10623	11212.8	5904.88	5578.87	5630.31	9993.34	10668.6	11746.8
HYOU1	14065.8	14198.9	12117.7	12822.9	11163.2	13501.1	14767.5	12657.6	15182.9	11891.4	12138	10232.4	12042.1	13015	13248.2	13251.7	13409.2	12389.6	13041.4	10812.8	12866.3	12815.6	12815	15312.5	11941.1	13489.2	13251.8	12840.6	11240.9	11658.6	16627.7	14720.1	13904.4	14074.8	13112.1	13303.8
IARS1	28391.2	28368.8	14234.7	27576.9	17015.2	27011.2	29038.6	28597.3	26336.9	24423.7	27456.6	19329.2	28021.8	31018.8	24665.7	21860.6	28276.4	29684.5	29261	22172	29430.3	27513.1	25717.6	21154.5	26339.5	28670.9	29523.8	26850.5	27148	10266.5	27336.3	26615.7	28603	28199.9	28997	27956.7
IARS2	5514.38	5670.21	4681.34	6782.59	5485.44	5368.2	5333.24	5767.27	5442.96	6619.15	5330	4950.35	6563.18	5863.12	5068.59	5351.71	5583.97	5902.56	5938.56	5179.56	5783.1	5600.8	5678.3	6398.27	5675.99	5399.92	5984.6	6863.24	5232.64	6435.92	5433.48	6344.42	5788.31	5616.15	6197.91	5445.73
IDE	6205.92	6027.71	3243.13	6238.71	3973.25	6539.38	6581.41	6365.94	6115.52	6560.12	6012.14	3384	6365.14	5500.99	5288.03	3169.41	5472.02	6324.22	6095.21	3469.93	5685.07	6278.71	5458.46	4846.35	4642.5	5927.16	6322.12	5774.28	5641.79	868.016	6792.71	6593.06	6097.87	6209.94	6232.76	6029.7
IDH1	10037	11972.5	5752.82	8184.67	7644.66	11211.1	10256.1	10861.6	12033.9	9579.06	10258.8	6015.01	8455.39	9248.73	8811.75	7460.35	9768.67	9970.77	10465.6	6909.44	9335.66	10631.4	9474.9	8477.49	8438.83	10847.4	10113.4	11112.2	8607.9	5521.91	10057.5	10228.2	10842.1	10394.8	9208.47	9580.31
IDH2	23218.9	21522.2	13776.5	20434.4	13323.2	20109.1	22766.3	24261.2	22783.5	17499.5	19552.4	12228.6	18849.3	20328.3	19535.8	11757.9	21145.6	19024.2	22192.1	16042.3	22005.9	20813.9	21869.3	19951.3	18752.5	23497.6	20185.2	20350.6	18172.3	11161.9	21400.2	22558.6	21794.4	23741.5	18751.1	20470.4
IDH3A	5262.9	5489.11	3415.02	4580.16	5389.37	5725.5	6269.77	5950.87	6629.29	4993.52	6060.68	5994.21	5300.49	4194.42	5667.54	5466.08	5480.98	5814.41	6244.03	5731.36	5425.96	5508.06	4984.8	6399.92	4803.37	4907.27	5335.33	6544.82	5381.55	6712.41	6121.72	5677.84	5373.76	5538.51	5383.07	5663.49
IDH3B	2461.08	2378.19	2265	2731.94	2407.8	3671.34	2989.13	2609.87	3177.41	2284.6	2390.91	3281.74	2615.53	2510.59	3013.13	3020.93	2113.11	2014.69	2047.12	3495.58	2535.46	2909.13	2064.98	2476.28	2140.39	2395.47	1915.94	2097.61	2435.08	4146.9	2722.29	2679.75	2707.52	2163.63	2377.34	1409.89
IDH3G	2697.49	2277.04	3700.15	2839.73	3153.05	3292.07	3228	1758.34	2090.87	2611.1	1703.61	1842.77	2728.47	3106.17	3242.65	1386.34	2428.12	1722.2	2026.19	1665.38	4040.01	2324.76	2152.33	6342.74	2399.64	3097.89	2258.96	1479.16	2021.92		3024.3	2983.38	2193.55	2627.12	2558.81	2763.8
IDI1	7537.57	7550.93	4088.82	6850.15	5226.68	6756.32	8746.19	7051.11	8144.57	7060.58	7849.4	3998.26	6119.63	6438.72	5403.43	6239.25	6257.63	7521.27	8154.57	5122.27	6623.06	8019.38	5298.64	4650.65	5739.71	7243.63	8930.39	8532.25	6622.29	2723.15	7979.01	6844.66	5548.52	7518.1	7818.49	7279.55
IFI30	1369.21	949.367	486.057	707.524	809.709	969.791	1027.05	785.401	1335.1		1543.92		1747.65	1096.03	1138.14	419.876	1112.37	1055.5	822.564	1259.13	1254.68		1458.79	1416.42		1183.38	657.942	476.957		251.993	1598.54	1699.85	1765.6	760.456	1113.82
IFT27	1155.85	820.883	1069.85	759.222	616.462		523.826	226.501	853.744		455.358		495.564	722.339	708.847		575.827		892.374		437.676	528.431	454.954	549.657		635.107	425.505	252.117	709.736		717.715	722.777	520.84	505.273	466.602	314.959
IGF1R	782.502	973.856	844.195	1090.94	1302.11	761.315	577.971	1073.2	1421.71	1835.43	760.909	564.163	1171.41	1049.46	1022.4	879.549	678.3	586.592	992.444	1322.63	1224.43	822.55	925.869	1253.79	1152.35	1245.33	808.074	996.394	773.218		1083.26	257.217	697.504	1226.71		657.153
IGF2BP2			352.696				387.033				412.331											194.145	372.266				131.144	366.066			96.852
IGF2R	1472.96	1242.62	1543.93	1809.49	1129.58	1453.11	1777.26	1209.74	1365.13	1685.35	1224.22		1275.91	1174.94	1389.59	1300.27	1121.79	1393.96	1352.48	2758.47	1288.58	1552.2	1173.3	999.522	1171.76	1554.2	1597.84	1275.11	1439.86		1273.09	1119.16	1318.03	1673.07	1409.87	1351.77
IGHG2	60057.1	72671.5	60537.1	95986.3	63225.5	84764.7	49405	74673.9	66118.8	145758	81431.2	82998.8	90595.1	81822	83333.3	74827.5	78160.3	75732.7	85562.2	117861	68854.3	87342	69686.4	87043.8	79398.9	89698.2	89757.4	141079	89414.5	125658	74638.2	67900.8	87207.8	63885.7	99459.5	86193
IGHG3	10051.4	5232.02	4470.29	16128.4	13223.5	1558.23	5593.88	4760.6	13697.2	3267.7	20969.1	12670.1	9294.94	4308.04	2966.53	2726.91	11036.7	13522.4	25628.2	3155.33	8388.47	15081.3	17622.6	11572.8	19631.6	8754.52	8147.96	44571.6	36600.3		20871.3	7525.17	15845.8	20384.5	1604.86	13047.7
IGHV1-45	51028.7	65492.5	24107.8	71248.6	22757.3	84609.9	42195.1	69250.3	56355	173868	80560.4	35055.5	65989	67242.9	67438.8	31542.7	73656.3	76829.3	72415	52140.3	58744.4	75101.6	52452.5	44114.5	51604.7	85065	75249.9	139460	76997	47415.9	60408.6	58415.3	78736.1	62340.9	78330.7	78908.9
IGHV1-8	637.83	1047.86		1393.14	281.502		910.348	291.54	756.593		594.421	547.297	988.314	698.463		395.584	341.769	618.763	644.417	625.714	572.23	965.462	803.242		457.602	601.844	501.018	1779.15		1156.85	712.654	334.583	691.252	624.788	466.189	985.581
IGHV3-64D	20629.4	31040.1	6865.67	34375.5	7141.95	23616.2	19704.6	24054.5	20693.1	37509.4	22754.5	10067.7	29933.3	37835.3	20444.5	10923	31437.1	36127.7	32599.1	23320	25623.1	32486.4	23858.1	17998.7	22645.7	32923.5	41920	58360.3	29308	10769.3	25487.8	26506.2	37803.4	22552.9	32886.4	32650.9
IGHV8-51-1	3427.73	1274.67	1225.99	1479.55	779.052		6056.13				5869.33						140.441		1673.14		1010.28	1954.35	854.629			5716.71					2969.89		3351.91	3822.11		4136.76
IGKV3D-15	5701.61	5973.49	5100.44	11822.5	3966.12	7561.46	5301.83	5470.17	5226.01	11493.5	6133.47	5380.39	7525.81	8614.81	6674.59	5969.03	8870.01	7241.04	7739.15	9222.07	4510.65	6256.18	4904.68	7330.26	6266.69	6288.11	7862.73	12432	8151.06	7273.28	7847.11	4755.44	9173.75	4624.48	12795.2	7956.81
IGKV4-1	160953	187140	92320.6	210111	99543.5	163783	180687	143082	148147	197282	193399	93306.9	158956	175451	129542	72989.5	157713	202285	240383	126577	147328	228112	158584	141355	141666	246173	205824	344543	173993	109836	195572	149468	251219	160161	190209	233741
IGSF3	2148.43	2062.7	1971.84	2698.16	1894.58	1836.06	2529.67	2275.79	1910.98	2519.25	1799.29	1986.28	2041.18	2102.63	2203.54	1532.37	2383.65	2292.15	2283.49	2223.25	2481.27	2272.33	2702.22	1983.65	1700.33	2493.91	2593.58	2308.52	2353.46	4502.52	1915.26	2338.19	2348.97	2455.1	1748.16	2366.79
IGSF8	870.309	212.379	3084.84	484.46	1359.62		1268.74	193.497			687.549	742.514	412.991		352.446		313.246	134.123	714.332		735.826	1184.14	1635.71	1477.92	1574.3	617.285		428.582	1170.29	821.246	556.837		467.348	260.688		730.724
IL17RD	428.169			759.067	649.519	756.963	372.399	803.154			1065.24		695.777		371.804	1023.08		562.897		300.617	633.955	572.181	440.296	560.613			883.923				563.46		855.415	558.278	881.918	1073.21
ILF2	25320.6	15076.5	17033.6	12151	11263.2	18787.8	25961.5	18909.2	19764.6	10147.5	17655.8	8134.96	17654.9	16993.2	15641.9	6931.25	17662.3	17981.3	17402.4	9385.27	21775.2	16378.4	18222.4	11772.1	13705.8	19871.2	14268.5	11603.7	16698.8	5298.31	22372.1	19594.5	15428.2	21441.3	13577.9	13889.8
ILF3	25981.4	22212.8	27870.7	20582.5	25443.4	22780.7	25476.9	21411.7	26480.2	15497.3	23503.9	23824	23218.2	17597.3	20652.5	19440.2	21705.5	18984.2	21708.6	22005.2	23593.1	22324.2	22934.5	19475	20700.2	22135.4	19622.4	16905.9	22558	18652	29778.2	25093.1	21705.9	26232.7	20828.1	24785.3
ILK	491.215	1321.44	1618.19	1141.65	715.539	1465.66	811.69	1490.89	1209.9		1239.03	1511.13	1310.18	1123.05	1343.48		1749.9	1936.91	1352.84	1770.38	724.092	1217.71	1339.76	642.927	2092.37	1593.95	1226.59	1128.17	1192.83		1081.41	1389.61	1218.36	1036.22	1637.56	1018.55
ILKAP	1364.32	2241.26	1229.76	2881.4	1390.59	1822.02	2656.68			1132.29	2182.06	1248.83	2657.66	2444.46	2304.05	2373.37	2884.34	2324.29	2676.89		1908.53	1646.12	2126.97	3046.57	2724.4	2007.65	2487.51	2264.58	2776.45	970.43	1841.01	1207.92	2224.97	2024.2	3358.65	1666.78
ILVBL	2548.28	2290.72	3953.85	1835.82	2569.39	498.151	2430.74	1284.25	1767.08	2337.9	2467.62	2731.24	2549.15	2017.82	2866.77	1980.79	1721.02	1903.24	1977.48	1294.63	3132.33	3252.88	3514.31	3568.55	1867.32	2975.93	3272.6	2707.49	2165.93	2463.28	2436.03	2328.31	2028.52	2931.88	2644.13	3318.7
IMMT	3981.84	3270.67	3173.66	2604.97	3051.44	3481.66	3248.69	3720.43	3725.84	2959.69	3762.04	3479.17	3493.29	3110.17	3907.62	2641.6	3401.75	3294.72	3240.07	2379.07	3379.54	3079.76	3612.13	3665.99	3676.22	3658.11	3571.36	3534.55	3895.06	2978.84	4206.65	4713.13	4311.79	4156.95	3467.77	4723.87
IMP4	1449.61	1371.19		1888.35	1820.54	1907.95	1800.18	1943.28	1448.79		1688.33	1450.2	1403.03	1470.34	1862.1	1166.85	1465.09	1037.47	1917.61	1347.08	1366.16		1459.09	1405.66		1245.98	1474.94	1608.04	1821.83		2619.73	2264.33		1966.98	1037.58	1642.87
IMPA1	3293.24	5082.85	6364.85	6184.11	4606.09	5923.79	4438.81	4318.56	4589.77	5161.12	4231.99	4415.14	6040.58	4889.18	5362.94	8148.64	4716.71	3172.84	4703.18	5466.99	4813.48	3930.15	4488.39	4403.55	6005.79	3149.85	4397.42	4378.34	8621.24	4046.71	4699.49	4629.77	4759.91	3508.73	4561.58	6378.38
IMPDH1	4300.36	3670.22	3916.59	4752.25	3319.23	5064.52	5864.85	6469.04	6251.25	5957.83	4017.48	2958.09	4540.94	3912.44	4394.79	2583.85	5642.5	4334.02	6508.25	5180.82	4845.65	4737.39	4660.83	4612.46	3675.66	4894.19	3951.41	4494.13	3956.59		4257.53	3578.81	4336.35	3710.03	3239.26	2912.18
IMPDH2	10677.9	7131.09	8906.54	9953.06	9531.65	9513.32	14397	16105.7	15979	14815.1	8869.86	9163.23	10877.7	9198.9	11909.8	9733.14	13733.9	13100.2	18341.3	17860.9	9300.33	7823.45	8992.14	8006.97	9121.45	8369.47	8516.27	8876.33	8461.75	5899.9	9441.65	9897.96	8743.12	9730.84	5941.52	9901.71
INPP4B	1915.82	2609.28	3461.29	1434.37	2462.91	2237.04	2832.28	3296.33	2560.9		2945.78	4392.98	3301.29	1963.64	3634.22	2250.47	2735.19	2698.44	2395.41	2563.96	2292.49	2188.58	2318.18	1783.94	2011.98	2834.82	2371.47	1997.01	2712	2138.38	2910.44	2569.15	2506.02	2249.62	1972.85	2641.88
INPP5K	1177.66	1077.03	674.757	1172.31	673.379	1025.72	687.95	811.036	1165.47	1679.12	1779.86		1048.53	1066.45	1243.67		546.598	977.39	945.226		923.658	1129.23	1079.84	884.053	932.178	869.795	567.338	1619.9	511.206		488.35	526.263	569.926	1019.23	671.428	1112.53
INPPL1	1923	1772.04	2269.75	1735.34	1956.03	2195.68	1940.89	1816.75	1963.43	2231.63	1690.32	2749.96	2168.8	2159.1	1384.02	2237.91	2026.77	1784.85	2315.96	2483.62	1763.82	1434.28	1620.49	2525.44	2234.6	1802.88	2151.35	1785.21	1851.93	2630.4	1645.16	1838.38	1765.43	1895.79	1393	1575.46
INTS11	732.499	810.417	354.355	922.397				761.453	960.105		453.984		1102.77	799.91	857.688	844.552	671.781	1194.54	1173.77		1036.01	916.813	789.635	315.414	899.542	924.199	1478.77					1127.22	1074	942.048	1854.58	984.738
INTS13	2151.05	1837.92	1798.95	2382.53	1886.1	1923.64	1513.22	1977.3	2222.55	2469.74	2159.49	3141.15	2034.96	2245.83	2133.61	2662.72	2025.63	1641.86	1666.92	2192.86	1725.38	2135.01	2231.67	1455.91	2440.57	1952.81	2145.39	1561.71	2345.32	4431.95	2063.38	1629.83	1631.75	1891.44	2228.58	2120.63
INTS3	992.99	1457.78	2181.21			904.546		438.493	1010.3		1200.05		1833.52	1569.66		1000.57										1022.09		1815.79			1063.52	602.311	1509.69			1057.5
IPO11			300.939				115.716																286.415			172.055
IPO4	6423.62	5164.34	8307.95	4317.58	8034.34	5290.55	6382.92	6102.46	5603.95	5010.25	7760.59	6569.56	6025.69	5235.19	7454.71	6648.27	6944.58	5355.8	8119.77	6977.28	6320.73	6615.62	6209.3	6758.92	6351.19	5155.16	4953.24	4542.81	6097.17	5990.95	6538.52	5743.1	5553.65	6034.11	4610.31	6128.48
IPO5	2112.71	1302.68	2028.93	1410.85	1760.96	1423.84	2023.67	2466.11	1823.98	2569.87	2370.1	2432.12	2081.21	1880.18	2820.04	2566.75	1632.82	2142.33	2514.07	2883.34	1967.93	1965.67	2083.92	1800.03	2061.32	2283.81	1575.3	1796.78	2793.25	1615.21	2157.4	1791.39	1644.4	2015.1	1165.81	2315.54
IPO7	4814.75	4669.21	5576.86	3254.24	3545.12	5352.56	5494.53	4073.04	5598.29		5222.45	5684.86	4826.3	4207.55	6066.39	3252.16	6391.91	5742.26	6732.77	6573.93	4754.46	5772.08	2800.69	4345.1	4900.63	4392.63	4623.6	4011.29	5396.9	1814.17	5720.7	6052.39	6160.64	6230.03	3794.08	5919.34
IPO8	630.852	528.539	330.439	725.859	730.163	868.674	649.089	757.363	717.331		673.423		925.911	372.043	774.994	771.425	980.683	864.418	1827.95		725.885	988.328	460.138	800.357			606.246	458.63			1006.81	485.387	419.841		604.861
IPO9	1245.72	1721.67	333.835	1330.85	831.334	1177.67	1177.27	1394.76	1503.9		1421.03		1369.61	1398.53	1421.42	1355.79	1517.55	1726.79	2020.41	2611.36	964.117	940.799	1382.37	980.739	928.768	1081.75	1220.6	1017.42	1125.34		1245.52	1262.13	1110.92	1163.24	1186.54	1411.29
IQGAP1	108134	118895	91196	111678	96039.1	125193	114610	132282	128373	105596	105758	97685.8	105792	101731	101293	83808.9	109173	94960.8	113522	100677	110283	114320	99689.8	96735.9	107899	132090	113960	102913	104500	103874	137820	144525	131091	104601	102861	107719
IRF3	1739.81	984.223		1397.82		1542.1	1551.58	1059.4	1387.67		1179.75		970.962	1241.34	1392.17		1067.26	1130.64			1143.15	1666.33	2214.31		775.931	2367.18		1355.79	1516.19		1533.33	1400.41	1062.25	494.762	904.393	1397.69
ISOC1	23916.3	24044.8	22499	25252.8	26358.4	15769.6	23464.7	23404.9	21162.9	19429.8	22521.3	26313.8	28738.5	26638.2	23158.3	15497.4	24395.4	24601.4	25628.1	24722.7	27862.9	25688.7	26041.7	24049	24918	24904.6	22215.5	21441.1	27436.9	17464.7	23446.6	23793.9	22344.2	22222.5	24868.1	28058.7
ISOC2	2135.2	1789.38	1438.03	1102.66	1897.08	1645.9	1822.04	2221.68	1467.97		1911.48		1658.81	1933.05	1878.16		1382.53	1372.07	2200.59		2247.17	2165.98	2128.76	2069.51	2441.15	1786.32	1341.27	2196.55	2124.22	1268.37	1518.67	1982.29	2019.55	1694.4	1270.04	1951.38
ISYNA1	1214.51		1290.77		1030.08		1520.68				359.457		613.1					158.729	667.53		1081.4	1095.96	942.39	856.276		564.017		731.5	461.45		1234.28		637.094	1242.78		648.789
ITCH	1074.62	815.175	565.882	1407.59	1107.96	693.798	821.429	1100.55	995.647	1046.03	849.081	716.839	969.824	1915.85	952.07	1182.75	543.082	1176.69	1270.59	1100.55	1440.25	1358.69	1719.56	506.476	997.205	1253.89	1223.78	812.858	440.7	1097.87	769.749	900.016	396.182	1077.5	1200.21	1616.01
ITGA2	5709.39	5336.71	3291.45	4444.61	2918.64	5249.65	6210.28	5586.07	4829.79	5897.64	5551.09	3259.46	4886.65	5349.44	4699.84	2927.98	6095.06	6193.74	5058.88	3553.07	5366.85	6190.92	4913.32	4183.81	4667.43	6230.26	5288.75	5836.19	5365.63	3401.48	5155.3	4759.32	5510.99	6421.67	5143.15	5718.19
ITGAV			1032.63					810.155			510.98					840.606	777.826		643.016			423.539	585.549	600.575		640.501	556.519		540.85			584.427		265.549
ITGB1	7254.54	7136.12	10827.4	8802.17	9789.99	7074.56	7780.56	7606.56	8344.55	8686.55	7576.35	8588.02	7738.44	6873.1	8190.73	9360.93	6590.35	7531.75	7129.84	9154.37	7353.45	7281.37	7619.85	8314.42	8551.37	7249.71	7714.9	7960.81	8601.2	9697.67	6277	6674.75	5365.66	6535.59	6947.33	7753.08
ITIH2		1632.9		2031.41	1501.69	1381.67		1243.53	1481.6	838.675	2588.01		1489.05	2331.19			1118.55			1252.47	822.89	1061.82	2006.09	1167.36		1514.3	1385.69		1045.63		2524.02	1708.73	1253.72	2294.74	906.432	1741.78
ITPA								597.09	522.598					565.908								488.114					243.944							923.257		644.247
ITPK1	8575.94	8669.44	6553.26	11614.4	8044.2	9281.33	10026.1	7122.67	6910.18	8710.25	5897.09	7795.85	8840.17	8151.75	5781.12	7119.28	8390.64	7712.85	9609.73	6524.12	8750.66	9287.66	9896.5	10367.6	9643.52	9362.45	7626.47	8969.47	8501.47	9073.46	8439.28	7765.46	9438.76	8142.04	8132.59	8641.62
ITPR2	785.89			1517.29		2528.83	917.881	1302.6						984.747	1164.83	1688.21		1869.43	509.228		740.127				1132.25	978.111						459.622	1212.33		619.181
ITPR3	6085.72	5381.36	7911.16	5943.15	7309.63	5242.74	5689.42	5844.85	7652.92	7301.35	8368.15	3656.9	5634.26	8029.73		5068.73	5387.47	8165.36	8619.47		5404.91	5119.54	7615.79	5885.19	7155.46	8005.88	4807.48		5825.69	14281.1	5877.66	6196.99	7681.33	6641.79	10531.1	5410.45
IVD	2857.31	2293.43	2617.61	3028.2	2796.47	2377.75	4552.22	2601.31	2720.32	2034.73	2641.76	3561.93	3542.64	2097.36	3283.91	2109.31	3180.75	3537.1	2773.59	2540.65	2433.31	1792.83	2609.64	2002.1	2494.11	3451.34	1772.98	1229.92	2435.58	1203.69	2592.72	2807.52	2595.08	2684.04	2045.01	2956.34
JAGN1	781.845	398.096	631.323			378.691	330.159	548.668	790.994				928.886	467.571	317.5		1102.81	936.084	533.959		733.321	802.032	834.765	1038.53	364.659	605.003	403.432	889.557	471.107		1186.45	1051.74	838.285	883.596	787.527
JMJD6	983.089	1745.45		2499.08		2094.88	1369.31	2167.35	1418.11	1177.32	814.291		1316.16	2521.67	1857.23	2259.62	1983.27	1670.1		3130.52	1331.33	1431.25	1045.21	1094.13	1985.17			1834.01			2791.37	1998.51	1921.72	1035.56	1853.82
JOSD2	1818.04	1911.5	1571.57	2020.39	1384.77	1463.34	1696.41	1226.56	920.774	2262.92	2318.64	1408.3	1592.48	2543.4	2166.53	1221.39	1646.99	1758.18	1419.67	967.437	2381.39	1392.81	2644.54	1026.85	2139.99	1545.18	2665.72	1868.9	2282.45					2699.15	2432.73	2385.62
JUP	5876.85	5313.82	6555.72	5272.45	5313.01	4678.94	5624.71	4827.01	5175.79	4059.19	4786.48	5132.79	5138.66	5288.45	5543.1	4862.74	5496.74	4983.94	5400.71	5114.75	5553.2	5466.39	5422.38	5747.36	7086.95	5874.41	4894.51	5347.22	5320.54	4427.52	5146.14	5762.66	4717.2	4982.58	5531.58	5095.23
KARS1	20227.5	24097.7	20227.6	23057.6	19816.7	23839.2	22604.5	21419.7	21584	20184.4	19015.9	17561.9	20600.4	20329	20186.7	20160	18734.6	18886.3	20640.1	16890.8	22005.3	23128.2	21254.2	23521.5	20384.4	22141.6	18513.6	23211.3	18162.9	17668.4	20339.7	22518.5	23021.6	20739	21793.9	19839
KBTBD7	967.104	613.28	783.725	622.319	828.19	450.733	420.623	571.787	572.48		889.793		350.772	586.177	544.426		584.776	308.207		557.463	1332.15	461.164	1344.2	1178.22		964.237	1086.99	1172.85			308.015	645.345			902.448	623.606
KCTD15	753.457	413.252	1010.23				642.203		775.791		1007.59	1255.68		710.002	605.896	1114.35		842.483	812.836		1089.39		1142.15				1090.41	1150.82		3873.78	713.899			693.446	497.344	1056.7
KDM1A	3721.7	3011.07	3987.78	3297.85	3596.21	3234.06	3788.24	2788.07	3464.51	4061.13	3397.7	2332.71	2558.16	3549.82	3717.61	2854.51	3259.27	3363.02	3780.62	5040.3	3979.71	3580.67	2946.62	2755.55	2781.34	3650.81	3547.58	3776.53	3067.34	3632.32	2961.36	3375.33	3431.3	3658	2705.9	3496.29
KDM3B	1422.48	970.648				1349.66	1244.03	1617.13	1999.87					916.208	664.078	549.405	1492.48	673.327	1465.3		931.649	894.45		431.495	396.139	1114.62	1065.08	1017.1	377.429		1832.51	1518.68	1519.32	1473.65	1406.93	1438.46
KDM5B						573.875
KDSR	1618.79	1593.96	2143.45	1592.03	2672.07	1559.45	1511.35	1223.28	1308.75	1914.6	1510.12	2618.85	1575.66	1837.94	1552.46	1316.66	2103.61	1800.88	1595.37	1100.21	1741.7	1782.7	1364.53	1232.39	1412.3	1720.18	1655.64	1610.41	1665.03	1696.12	1561.1	1079.54	1405.73	1541.27	1520.31	1949.94
KEAP1	1785.75	1698.52	1414.19	1851.24	1721.3	1693.17	1747.28	1597.52	1478.31	2133.73	1851.85	1204.62	1904.68	1913.09	1808.49	1614.14	1723.8	2038.9	1355.76	1628.72	1692.25	1884.83	1689.17	1261.86	1561.78	1630.64	2858.67	1850.47	1732.11		1889.3	1616.5	2113.92	1954.06	2235.81	1964.82
KHDRBS1	3871.82	3273.13	2069.73	2782.55	3304.85	1160.45	3009.03	2964.25	2868.64	5594.8	1924.09	1698.97	3014.36	2456.31	1493.32	1803.27	2716.48	2327.1	2455.16	2100.16	3618.59	3123.74	2910.99	2885.43	2370.42	2143	2125.74	2203.37	2586.03		3671.54	4215.07	2654.21	2893.13	2476.99	3318.04
KHSRP	3178.22	2513.11	4326.27	2132.14	4164.41	1666.63	2778.74	2121.25	2853.68	2861.79	3406.93	4375.69	3895.08	3071.55	3459.36	4779.06	3285.79	2932.91	3334.17	4388.14	3035.29	2709.36	3432.7	3737.55	3653.58	2642.61	2915.22	1593	2811.19	2790.55	3552.29	3098.68	2787.47	2817.08	2367.46	3629.12
KIAA1522	576.116		700.527		479.906		609.365					698.836									155.518		492.957	598.475		241.14			235.117		106.046			207.325
KIF11	977.711	1096.88	1250.01	861.044	447.222	1186.35	818.461	1006.59	1015.97	1685.99	654.461	773.466	907.594	1206.33	1222.79	697.596	1219.61	730.203	986.064	1070.49	1433.45	1227.75	1022.71	1057.49	883.843	775.074	1169.7	1264.92	1029.66		1386.3	1071.35	627.957	884.767	894.212	562.239
KIF13B	1652.47	1947.44		2313.71				2087.83		1157.01	2357.09	2367.78	2849.95		2076.9	2833.02						2010.33		2115.25	2863.76	1963.66			2595.35			1595.39	1292.02
KIF15	575.153	519.706	843.259	584.464			288.514		314.734				638.706	638.758							839.771		650.665		518.738	216.419	285.563	595.38	690.857			486.335		269.034		1225.52
KIF1A	647.517	498.568	1223.9				442.305	363.104	256.214		436.908		869.305	753.021	530.492			552.328		1155.21	480.378	580.854	573.192		595.832		705.084		590.765			577.968	584.203	409.852	845.314
KIF21A		523.696					657.688				359.303		836.737	466.022	577.056		237.157				663.32	611.338				801.853		1095.35				407.252		1145.31
KIF23	1228.95	1344.58	1276.67	1176.02	1324.58	1106.11	1259.36	1369.97	1711.62	1017.44	1386.34	1096.43	1168.73	1468.43	1415.88	1372.53	1918.47	1366.17	1921.91	1758.81	1577.89	1050.18	1623.1	1186.1	1197.83	1273.73	1611.17	1748.68	1188.07	1621.67	709.377	1351.47	1037.36	1157.35	1512.56	1069.93
KIF2A	1265.19	1920.01	1294.73	1704.62	1474.76	2258.86	1210.03	1305.68	1621.62	2365.41	981.318	1665.51	1545.33	1431.51	1436.71	2714.43	1879.64	1356.52	1696.87	1688.53	2089.06	1610.78	1954.5	2144.49	1847.33	1395.18	2121.31	2052.92	1302.98		1930.45	1902.42	2098.69	1409.09	2356.85	1657.89
KIF2C	973.088		476.922			727.857	732.288	1092.09	338.895		985.012	1036.46	168.874	897.421	349.165		728.756			316.078			670.851		440.546				865.05		1128.25			450.12
KIF4A	1156.37	1238.14	893.53	1848.01		672.878	1009.08	1536.26	889.455		654.174		1609.17	1128.01	1069.6		1052.92	1191.48	1795.47	1546.74	1310.88	1191.28	1066.37	1514.11	1352.09		1086.48	1181.66	848.252					1418.8	1306.12	1220.49
KIF5B	5260.33	5437.47	5155.75	5296.96	4911.15	4587.58	5093.48	4714.13	4637.41	5609.47	4839.24	5840.8	5095.9	5392.66	4961.58	5584.97	4745.25	4760.05	5618.85	5810.34	5690.13	5328.93	5835.4	5580.97	5667.04	5028.67	4939	5798.14	4916.31	5475.7	5048.11	5858.27	5403.88	5174.46	5061.99	4923.36
KIFAP3	262.915	516.597	547.903	437.373	698.859		482.824	356.83	385.939		586.519					652.683	738.116	624.516			626.545		500.19	428.828		546.822	441.679		646.912		1128.38		201.355	703.988
KIFBP	1152.92	2150.53	2598.23	2140.75	1999.5	1542.14	2310.53	1401.01	2014.94	2277.58	1884.3	1782.79	2282.79	1448.22	2061.39	2033.62	1926.94	1823.04	1823.79	1779.32	1599.39	2382.74	2662.74	2517.71	2414.05	1893.25	1558.99	2110.33	2442.17	2621.62	1834.84	2060.82	3115.93	2015.44	1710.72	1305.56
KIFC1	1009.47	1046.29		1535.98			904.173	663.848	1197.66		1014.42		736.866	1259.85	896.561		1256.97	941.597	691.388	580.267	1196.28	1069.97	1045.69	1473.77	1239.82	976.052	1513.51	1164.59			651.515	954.659	1032.97	927.271	1282.95	1179.81
KLC1	1249.79	2112.22	1491	506.244	778.279	939.527	1159.69	876.976	1328.47		967.027	1328.81	693.927	1144.08	1022.98	726.92	791.306	1031.77	554.288	927.763	801.424	774.693	722.685	749.378	1173.81	1071.63	777.849	1046.3	1163.94	689.947	1027.97	1246.2	791.323	557.511	605	583.557
KLHDC4	1258.3	1361.17	2341.32	1329.65	2174.88	1061.1	1687.59	846.577	1469.1	2430.51	1536.84	1696.49	1540.03	1278.97	1205.7	1264.81	1173	1028	1565.82	1628.92	1412.76	1024.98	2078.38	2127.27	1865.5	972.798	1233.81	975.933	1819.81	1372.42	1340.23	734.38	835.332	1367.2	1152.26	1317.05
KNTC1	346.323	472.093	268.468		153.065		261.493	527.926	301.647					800.52	133.054			232.292			333.249	213.727	222.855				152.174	438.357			640.538	269.822	428.275
KPNA2	3839.19	4815.91	5079.31	3437.62	3560.84	4641.46	4284.78	3826.23	3682.89	3228.22	4194.34	4444.37	4420.14	3443.03	5162.29	3072.82	4136.82	4810.68	4274.14	3976.36	4202.39	4325.7	4911.09	4137.52	4113.29	4494.45	3590.88	4102.06	4223.71	3817.86	3554.2	3698.81	3286.17	3418.32	4627.25	3806.88
KPNA6	4140.73	3936.78	7619.53	4089.06	4950.8	4674.27	3385.87	3530.46	2825.25	2736.54	4190.96	4034.29	4164.4	4869.29	3495.82	5570.46	3699.46	3744.26	3934.08	3491.06	3773.2	3638.9	4638.75	4692.58	4648.45	4167.49	3335.2	4434.8	5017.83	5238.46	3817.67	3607.11	3712.65	2973.73	3930.63	2082.47
KPNB1	3617.8	3537.23	3020.09	2437.65	4024.46	2959.43	4196.38	2903.25	5016.24	1572.63	3941.14	3154.66	4568.54	2716.42	5181.1	3644.1	4557.75	4005.36	6248.03	4667.73	3063.64	2686.11	3140.44	2423.49	2979.93	3021.19	2515.01	2042.3	3117.13	2393.54	4408.5	3665.47	3870.11	4366.81	2279.83	4281.28
KRT1	43808	53326	22212.5	41521.1	27257.3	18743.7	44055.5	34791.4	50553.1	90783.9	22306.9	31249.6	45954.3	20585.6	28337.5	14182.1	19009.1	18331.9	65096.5	14463.2	35844	14682.3	22662.7	81531.1	220969	25830.5	26905.3	36129.4	20549.3	94218	50523.5	109340	96824.3	18626.2	121925	68291.4
KRT10	25240.5	18383.6	5519.24	14072.1	6791.25	9478.63	17587.6	11271.4	14259.3	23947.3	9506.84	9982.83	18612.7	9180.35	7659.06	9095.3	13164.2	9435.15	12660.4	6300.02	10836.9	5292.46	13688.9	31420.8	45424.9	12824.2	18223.9	20910.3	10627.8	23568.9	23332.6	19907.1	49535.8	8219	47409.9	42454.7
KRT13									2119.6		680.516	1225.96									466.702				2902.25	426.658										19578.6
KRT14	644.132	1877.16	2796.19	2739.57	1743.99	1772.37	1662.18	1951.44	2637.47	3807.35	1024.84	1568.06	2432.01	1133.94	1671.17	766.538	1262.61		3149.14		710.485	1019.65	1030.86	2362.09	16957.6		1224.53	1605.42	1678.45	7468.79	1528.1	3058.49	3976.98	1093.44	16783.2	2656.6
KRT16	355.741	665.971	6946.19	3668.29	1797.96		1939.25	918.674	1233.05				850.716			581.478		546.994	1880.72						18575.1	5315.14				11212.2	391.128	285.636	1800.43		36524.9	1263.2
KRT17			945.132				952.975		470.392															887.633	4388.67	641.122				1723.66			2172.76	1031.99	6421.81
KRT18	245722	188702	225594	254177	234792	163948	223503	217212	236609	182940	219144	228742	223141	250372	234993	244855	226520	231155	245588	256655	244696	218038	260777	263536	254713	231707	251131	151490	233142	167290	249235	226185	276011	240021	223318	215801
KRT19	155777	110881	125968	135169	135663	109129	149151	136405	168982	128723	131131	116675	132056	131658	140271	116159	133885	142673	153187	153157	149123	142733	148394	132121	144366	150251	151920	97085.1	150206	68975.2	173801	148051	175962	157573	130560	132093
KRT2	18115.1	17961.6	7088.15	12697.5	8272.68	11131	18087	15700.5	16772.6	24220.2	12403.8	15178.2	20707	10580.3	10614.7	16430.2	19838	14657.8	12178.3	14043.4	13644.9	6085.83	25770.4	40484.1	54725.3	9085.62	13914.8	7769.38	15084.5	16738.3	23422.9	20010.3	68841.6	10421.8	13322.9	69969
KRT4			1222.46	2161.7	2404.66	931.755	512.253	541.641	372.039		926.45	6431.1	1627.1	1348.1	3427.15	6092.99	3002.09	3957.39	3492.6	6293.62	109.186	707.601	1183.74	3184.88	2364.31	3818.5	3813.43	1842.84	2929.27	5086.66	878.899		1023.69		1137.96	593.914
KRT5	6732.6	7339.53	5580.76	9156.95	5352.63	3748.62	5585.13	6012.01	5789.37	10904.7	5190.28	4482.38	6606.37	4819.2	5129.21	5278.18	4535.14	4249.61	8492.77	1259.11	4549.53		4006.14	11275	39996.6	3409.31	5405.94	9126.34	2454.42	22557.4	6326.64	10984.3	14492.1	3739.33	58694.9	12036.4
KRT6B			2929.27	793.071			708.488																		7513.59					1379.68					17071.4	822.613
KRT6C																																			1384.81
KRT77	3426.62	485.9			416.909		908.626			911.253	329.751				551.637		361.304				891.403				1266	1050.46	3691.7	1182.95	726.329		1003.53	651.083	705.475	438.251		557.315
KRT78	8592.93	7259.75		3216.37											2578.61				7917.81		3198.2		1988.64	4298.2	12158.5			8918.85	3263.29		8541.97
KRT8	355592	259683	215646	295565	264691	234416	347398	296223	397749	271900	290632	234376	277414	285848	274261	227683	271317	289790	317327	247108	309418	312989	283004	243383	285086	324121	293856	180744	292925	114592	401206	326986	406368	368316	280475	298076
KRT80		347.714			521.546						493.791										397.602				765.541			761.943		602.349				150.128		589.042
KRT9	31477.2	90658.8	44568.6	73572.1	77920.5	19082.9	66881.2	74790.7	91405.7	191538	32877.9	59212.7	61519.3	20042.9	51939.5	26546.6	21858.1	22524.7	100383	22476.9	56093.5	24546.5	32137	76228.5	665626	32945.5	12002.6	31258.5	25600.2	233161	75740.7	194749	120884	22489.6	131451	105949
KRTCAP2	727.912						135.23		447.566	532.637							359.984	352.485			239.042	395.848						492.625				637.7	447.328	378.168		323.557
KTN1	668.383	217.374					727.869	272.975					401.798	553.524	724.484			578.387		193.861	491.347											318.314			352.801	430.593
KYAT3	1962.58	2000.83	2696.38	1821.26	2665.5	2197.94	2600.56	1821.65	1632.61	2101.56	2250.22	2456.15	1941.79	1792.68	2501.95	2877.54	2171.8	1698.5	2561.62	2407.75	1879.4	2344.94	2485.29	2689.21	2467.38	1898.09	2072.91	1901.83	2515.82		2140.24	1564.34	1992.6	2518.9	2295.6	1718.74
KYNU	7144.48	7588.23	6069.12	8728.83	6683.65	6726.71	6832.5	6626.39	6046.5	3683.2	6072.7	4495.6	9906.17	9446.38	7065.91	5892.7	7122.81	9538.2	8782.96	7135.43	8326.98	9247.51	7785.41	7454.29	9400	6440.79	9604.56	9026.54	8411.47		7192.05	7886.6	7722.72	6951.16	9022.83	8958.56
L1RE1	2293.89	2740.52	1978.57	2918.29	2501.04	2701.61	1998.14	2238.47	2534.07	1732.71	2143.46	2189.13	2256.85	2433.97	2496.85	1518.34	2035.76	2060.8	2626.21	2405.96	2053.98	2286.59	2188.83	2281.92	2309.71	2256.7	2957.18	2245.66	1833.2	3205.32	2527.84	1904.08	2822.75	2355.74	2393.56	2128.52
L2HGDH	3551.85	3792.91	3139.18	3697.24	2502.33	3015.01	4376.35	3998.55	4482.32	3234.7	3708.24	2950.71	4065.73	3581.07	3924.02	1952.18	3800.08	4630.11	4216.65	3513.91	4231.75	4713.46	4404.63	3170.14	3571.82	4344.71	3896.15	4340.91	3697.28	3882.69	4167.78	4481.39	5109.47	3876.23	4344.57	4582.71
L3HYPDH	229.03		280.574				217.242		273.478		351.36								277.326			124.316	305.706					182.007	412.738		137.772					216.283
LAMC1					749.624		1067.1	1069.86																1197.23								1589.15			1316.96
LAMP1	7720.62	7978.63	10091.5	11374.3	9936.99	8266.12	8806.69	9524.85	8139.8	11569.3	8743.13	9739.36	9598.79	8243.5	7289.07	8795.98	6672.01	8721.63	9937.24	10726.9	10052.5	6996.71	7376.12	7494.32	10252.5	10433.6	7928.63	7960.83	9678.72	9155.61	9054.27	7861.23	10545.3	7901.61	9204.36	7501.35
LAMP2	1218.16	1533.83	931.563	1852.81		1638.54	1947.76	2153.33	2040.01		1405.49		2263.79	1044.15	1349.31		1633.36	2021.55	1602.26		1432.22	2432.9	1160.94		1143.06	1145	1285.07	1383.35	1093.41		2765.8	3242.75	3469.13	1679.95	1546.86	2290.99
LAMTOR1	338.78		77.7595	210.835	288.617	280.371	502.505		356.369		350.365	392.291	163.281		319.638	803.164		496.258	147.503	1210.58	434.834	363.301	180.298	77.125		419.452		85.199	767.993		334.621		130.906	206.398		248.423
LAMTOR2	1316.77	1312.8		1324.54	868.129	1210.1	924.57	1250.34	603.297	1079.45	523.201	975.063	710.07	764.408	518.211	901.113	999.458	1791.38	1666.28	534.928	1287.21	1352.86	1172.5	943.197	1172.06	742.635	996.525	1353.21			1474.27	1253.58	885.194	1020.75	1398.01	1241.05
LAMTOR3	1814.54	679.754	1298.94	1246.11			1026.47	2079.91	2477.38	2072.47	685.645				1068.98	291.988	1181.67	836.224	258.667		1510.12	1495.63	1043.75	606.363	803.335		2465.65	1473.7			1910.3	2784.07	997.206	1065.69		806.535
LANCL1	898.692	1252.91	1422.54	793.318	1288.77	1342.56	1532.47	1574.35	1203.4	1350.32	2077.94	1333.51	1774.38	809.429	1173.84	1145.7	1597.47	1920.83	1119.34	1835.93	1444.07	1448.11	1441.64	794.43	1249.5	1762.16	949.468	1314.26	1295.44		1478.26	1102.19	1564.85	1539.45	1014.98
LAP3	5682.37	4947.81	5001.14	4850.77	5473.54	4380.84	5660.34	5299.22	5168.68	3726.4	4936.76	5031.1	4801.86	4363.86	5066.31	4226.96	4693.73	4123.86	4366.23	4198.59	4172.09	4264.21	4726.25	4861.5	4328.26	5102.39	4106.08	3532.88	5222.73	3829.61	4633.95	4564.02	4556.83	4977.68	3651.13	4590.63
LARP1	4854.83	5410.41	7417.58	4174.18	8912.04	5497.71	4475.3	4363.07	4379.98	3497.52	4764.71	5529.63	4093.8	3914.07	5235.61	5411.86	4518.94	3733.27	5445.91	5300.66	5234.78	4161.72	6090.23	5998.81	4742.56	4487.97	4317.38	3097.2	4190.05	7637.64	4689.13	4576.43	2719.86	3917.79	3811.71	4389.57
LARP4	5223.72	4694.91	7123.34	5827.61	6488.99	5345.01	4732.06	6555.98	5511.52	7885.2	4209.01	5321.47	4932.24	4235.31	6008.66	5300.66	4924.65	4678.97	5181.56	6270.68	5138.12	5784.4	4808.28	5802.24	4116.57	4539.7	4891.77	4182.65	6671.69	5869.2	4903.08	4639.17	6012.77	4818.54	6574.78	4088.59
LARP4B	2366.78	1998.79	1242.29	1719.97	2158.48	1925.29	2829.83	2527.55	2194.87	2134.65	2036.7		1732.87	1963.47	2305.66	2256.55	3131.88	1701.47	1712.52	2067.46	1273.37	1966.19	1509.26	1433.63	1686.15	2055.31	3107.56	1567.53	2259.92		1959.7	2417.71	2437.99	1895.02	1822.87	1580.9
LARP7	3165.9	3191.61	3789.65	2671.69	2874.67	2235.53	3053.09	3190.7	3409.77	1805.13	3145.68	2440.69	2387.32	2546.1	2904.18	4086.44	2564.28	2372.67	2593.79	2954.45	3371.39	2514.49	4013.81	3031.36	2848.3	2555.23	3497.15	2066.41	3055.24	3221.9	2868.07	3477.37	1647.3	2771.71	2510.11	3273.84
LARS1	11970.8	11793.2	7714.83	10210.2	7467.99	12342.4	13389.4	12692.4	13287.8	9772.12	11711.5	6948.76	10413.9	10094.9	9524.01	6679.82	11115.5	12015.7	10865.6	6592.71	11388.9	11937.3	10610	8347.73	9555.69	11658.3	11035.6	10873.8	10120.4	8402.32	12940.2	12897.8	11154.8	12323	11660.3	10845.6
LARS2	2852.92	2661.29	2377.96	2948	2331.67	2848.68	2348.52	2949.33	2815.45	1988.64	2550.41	1896.42	2084.91	2819.47	1855.51	2959.45	2720.48	2741.21	2187.67	2914.9	2783.31	2027.96	3138.22	2505.94	2429.4	3064.7	2347.35	2399.88	3382.19	1226.59	2267.54	2330.33	2413.56	2280.71	2769.6	2637.13
LAS1L	461.386	594.127	782.18	823.426		590.666	779.58	489.248	1306.62		626.931	896.636	636.006	921.949	333.349	461.403	783.382	870.013	931.096	564.743	812.446	641.967	435.328	859.486	477.121	901.665	703.108	785.542	990.967		744.959	638.714	1078.47	636.27	621.457	533.794
LCLAT1							2326.56													2571.96												1876.57
LCMT1	1994.35	3621.85	3255.04	2716.7		1776.81	1968.36	2358.99	1873.41	1766.51	1778.89	1932.23	2498.51	2089.28	1349.96		3127.37	3407.02	3447.32	962.618	3379.66	2522.94	1798.78	1503.06	1904.87	2739.12	2841.9	2742.1	2038.11		1803.97	3284.61	2746.21	1314.62	2772.16	2516.47
LDHA	54148.4	49293.6	46319.2	48934.1	41114.8	54346.1	53965	49735.6	46727.4	49187.4	51273.9	53494.3	51195.4	54102.7	52864.5	52332.8	49186.1	51396	51999.6	48796.7	55171.2	53461.5	46106.8	52593.1	51554.7	54805.1	50831.7	58343.1	53102	42123.7	49858	50683.9	51979.3	48317.4	53936.3	50189.6
LDHAL6B			927.045				3669.53														786.506	1481.14	859.658			1837.86
LGALS1	2057.18	1701.57	907.991	1043.61	1622.96	1800.21	2648.4	1851.98	2020.71		2493.66	2507.04	2383.83	2400.75	2074.45	1929.84	1574.34	1960.28	1159.55	998.025	1628.9	654.333	2346.24	1682.37	1917.89	1581.34	1457.38	979.181	1551.17	940.465	2212.53	1954.98	2398.68	2631.15	1488.95	2828.82
LGALS3BP	2104.79	1157.63	1054.66	1302.3	863.891	997.831	1500.21	1447.56	1140.07	1717.94	1158.42	1601.13	1386.94	1278.08	1370.84	1597.4	1123.92	914.373	1046.07	1338.56	945	1186.32	1327.19	463.475	1583.92	1672.96	1325.22	1237.27	1844.79		1294.23	1017.45	1079.84	1376.28	729.164	1847
LGALS8	860.906	1198.77	646.642	955.15		676.751	602.089	1211.6	818.141		867.621		895.669	1110.21	1157.64		1017.08	1375.3	1179.73	1063.98	1009.55	703.245	1121.28	497.78	921.32	989.118	909.848	1022.45	1099.12	1487.29	807.198	646.217	633.18	750.745	2239.75	617.013
LIG1	3133.19	2942.43	2626.4	3456.37	3135.91	3345.12	3131.51	3064.07	2457.28	1819.68	2954.57	2929.52	2607.32	3046.95	3283.45	3751.28	2770.1	3169.4	3312.62	3513.85	2886	3004.92	3426.81	3132.14	3608.63	3467.96	2689.78	2792.88	2892.27	3083.03	2540.22	2702.78	3175.24	3049.76	3382.08	2611.71
LIG3	2010.76	2083.73	3025.47	3012.11	2180.22	2347.96	2229.07	1980.99	1832.85	2468.57	2047.08	2327.07	1867.71	2915.18	2016.1	3135.64	1752.47	2570.7	2451.25	2239.62	2534.77	1846.29	2087.56	2599.79	3099.22	2091.42	2716.6	3684.2	2131.59		1343.1	1867.34	1861.8	2500.74	1826.03	2370.24
LIMA1	2655.46	3654.81	4671.23	4374.93	3165.91	3646.34	3649.31	3274.99	2595.92	2807.93	3597.23	3664.02	2828.89	4149.49	3956.97	5763.99	3683.87	3944.88	3687.79	2945.37	3381.09	3457.99	3655.51	3669.85	3471.46	2628.5	3647.73	2043.36	3699.04	5007.7	3046.09	2440.51	3529.1	3104.43	4105.14	3473.08
LIPA	1598.41	1929.05		1394.53		2044.01	2588.81	2636.66	2315.74	1896.4	1549.53		1561.46	1529.91	1246.95	1368.63	1919.65	1617.6	1757.43	1408.32	1503.97	1720.01	1309.37	1148.12	1280.6	2345.19	1538.05	1767.86	2006.93		1352.64	1300.66	1857.07	1392.52	1710.12	1549.37
LLGL1	1899.51	1341.2	2381.52	1366.39	1876.31	1097.37	1760.93	1212.52	1363.69	1288.44	1724.94	1925.62	1575.26	1841.22	1459.31	2611.47	1409.66	1903.71	1604.67	1903.44	1678.8	1906.37	2330.21	1735.96	1952.22	2159.92	1705.27	1740.7	1609.1	2862.11	1719.28	1270.45	1575.5	1615.18	1713.13	1448.5
LLGL2	1599.04	1495.43	2055.52	2239.35	1323.11	1755.48	1998.84	2250.29	2010.25	2109.13	2463.69	1850.45	2187.66	2322.58	1918.27	1949.38	2227.25	2544.12	1955.43	2590.85	1589.91	1479	2078.33	1853.46	1799.7	1627.08	1329.97	1977.81	1575.14	1787.83	1652.71	1624.93	1243.97	2086.32	2139.36	1299.68
LLPH	210.278												319.15								653.168	196.774	898.551					345.438								216.48
LMAN1	14039.6	14956.6	11177.4	15884.9	12666	14452.1	13719	15452.4	13624.8	9906.97	12634.1	12507	14924.7	13998.8	13275.7	15355	13751.3	14264.7	15569.1	12995.1	15750.5	15067.4	15683.3	13801	13774.6	10946.4	13447.4	11060	12201.3	8338.22	15683.4	16512	14549.9	14917.9	14779.9	16534.6
LMAN2	13176.3	11399.9	6997.93	10920.6	7687.92	9899.92	12550.6	13236.8	12815.4	9758.51	13529.6	6322.04	9561.6	11011.8	9906.86	4905.51	9833	11452.1	11629.5	7787.83	11649	11760.4	10553.4	8423.14	9023.72	12015.2	10949.2	8763.67	12143	6097.9	10891.4	13501.5	11406.5	13516.5	12112.5	11647.9
LNPEP	943.139	1204.51		977.785	1399.13	960.394	1217.91	746.447	1020.79		939.029	1259.5	1213.96	1463.81	1546.15	1714.14	763.436	1228.01	936.385		923.701	902.882	1068.5	903.587	908.7	1040.18	1164.98	1076.9	1256.35		822.579	1075.76	734.63	1207.96	846.33	1051.27
LONP1	4305.3	4639.56	3864.16	4185.26	3659.09	4331.78	4656.76	4575.66	4160.47	3349.5	4121.53	4298.56	4448.25	4282.42	4557.39	3782.01	4819.97	4171.64	4310.24	4017.91	4555.73	4222.66	4112.8	4139.74	4142.7	4293.2	4351.37	3676.34	4758.97	3400.86	4471.09	4648.17	4352.91	4247.94	4584.73	3594.49
LPCAT1	1562.48	1299.37	1726.28	1133.24	709.134	1176	1108.86	1357.3	1065.64	1803.96	1240.18		1121.56	767.206	1273.32	797.887	1141.94	1258.77	1179.7	805.217	1148.4	1222.34	946.447	1019.98	1202.98	1166.84	1342.04	1269.61	881.155		1674.17	1093.69	1214.33	1288.22	811.799	1452.75
LPIN3	724.137		1039.55		407.131		352.138				210.568								998.991		606.404	378.106	451.643	870.99							699.211		588.373	636.785		204.94
LRATD2	1448.9	1281.79	997.63		1190.57	1080.93	1049.4	1440.05	1068.47	1337.15	1083.79	1073.54	606.553	1201.12	1774.27	1633.26	1025.23	1283.9	689.705	802.086	1086.75	1085.6	766.959	1447.94	541.299	928.3	959.338	1115.66	1107.54	2027.52	1386.44	835.417	1176.75	895.169	1707.68	1200.01
LRBA	4333.79	3390.65	4405.81	4238.06	3825.54	4389.98	4193.74	3999.56	4277.25	5479.83	3443.28	4154.7	4000.83	3706.08	3798.17	3397.94	4190.23	4563.64	4206.76	3994	4360.88	4501.11	3656.28	3264.89	3774.46	4474.25	4005.79	4575.38	4461.22	4336.85	4431.25	3766.25	4518.62	4024.56	4098.21	3606.75
LRPPRC	21334.9	20754.3	13207.1	13505.6	13973.3	16387.2	19820.2	17243.7	20051.1	9825.94	21008	12703.7	20998.4	17861.2	18840.5	11931	20627.7	17809.6	23007.1	13568.3	22005.2	19057.3	18497.7	15728.2	16843.1	19291.9	18081.8	16099.5	18632.7	8328.91	22858.8	21927.7	20209.7	19614.6	14501.3	20496.2
LRRC1	508.142	311.61	983.219	698.52	1012.49	452.428	622.275	264.816	608.39		493.309		604.686	254.175	275.034			586.678	563.214		751.759	520.902	796.894	688.829	441.815	897.67	468.138		519.733		423.719	251.781		624.959	406.591	458.034
LRRC40	760.098	1001.67			992.161	1020.6	1037.09	774.465			916.877			1064.82			941.677	764.198	576.469	1670.08	1127.23	1021.06	1023.46	1000.63	1131.36	817.754	1425.6	1907.12	1248.54	1068.43	1103.61	1229.15		902.303	1063.19	1031.18
LRRC41	1543.91		1453.16	998.754	797.451		1352.2	1559.23	960.504		680.091	1172.07	778.373		970.453		680.342	759.733	917.133	878.064	1165.09		750.769		904.802	2165.55						620.609		1194.12		574.299
LRRC47	6248.6	5710.72	7480.48	6334.58	6278.18	5601.09	5763.13	5795.51	5234.42	3441.34	4965.11	6166.65	6051.95	4843.01	5933.54	6893.67	6161.99	5888.77	7091.62	8325.1	7251.71	5940.73	8358.21	8754.11	7108.33	5604.17	6832.43	6027.35	5057.35	7208.21	5518.65	5506.38	6093.48	5627.96	5716.72	5361.52
LRRC59	1470.67	1197.47	1465.55	863.707	1477.47	999.575	1393.63	687.931	1485.84		1277.76	1842.68	1383.65	894.854	1421.61	1247.6	1293.35	1529.76	1344	1106.09	1281.02	1233.67	1570.99	974.509	1000.64	894.2	693.229	1061.1	951.059	1608.07	1010.28	1866.64	713.307	1320.14	790.872	1155.85
LRSAM1		211.709			221.261			284.211			332.267					408.947	418.861		374.083		336.542				340.299
LSG1	3267.88	3229.53	3141.24	3175.14	2604.82	2399.52	3244.96	3658.2	2574.21	2303.69	2498.28	3917.23	3429.8	2894.03	3455.35	3425.78	3229.64	3288.81	3285.21	1999.43	3508.33	2679.81	3550.45	2442.18	3173.87	2917.24	2449.9	2012.59	3404.21		2825.89	3357.6	2479.94	3343.2	2622	3379.57
LSM12	5208.79	1832.67	4620.88	5184.15	3938.72	3779.94	3155.87	4386.39	4732.61	2944	5640.36	5240.52	5292.08	4179.03	3981.49	5727.14	2936.21	4234.84	3663.91	5685.99	4264.09	3909.2	4364.72	4258.7	4152.59	5046.78	4806.62	3304.84	4975.81	2748.5	3070.99	3261.64	4057.16	3169.49	3983.02	3760.1
LSM14A	1579.41	1537.36	1969.25		2363.97	671.308	1240.67		956.997		1586.83	1798.43	1307.01	1547.99	1712.36	1921.44	1367.93	1169.06	1749.52	2174.28			1391.77		1772.07	1643.95	1037.78	376.226	1926.97		1089.05	1403.31	1917.03	1442.19	1276.97	1055.07
LSM2	1329.42	1077.69	2119.14	1620.24	1502.77	704.527	1103.5	876.62	1227.46	1676.05	1589.83	3502.3	1363.11	1546.64	1018.72	2069.4	1203.21	1076.95	1625.76	1535.8	2052.68	1760.64	2095.99	1873.71	1575.38	1740.79	1419.98	2149.29	1443.78	2623.18	1943.81	1186.01	1268.96	1015.08	609.446	812.583
LSM3			816.727		535.58		564.472										514.977															386.527				447.233
LSR	1320.56	775.662	1673.88	1828.5	1665.81	1202.17	1543.23	1100.9	1106.08	881.175	1509.37	1646.4	1028.84	915.077	2571.52	844.772	1611.71	1243.38	1158.57	1657.33	1315.34	1065.07	1290.7	1099.69	1274.61	1401.06	1024.29	1388.66	1353.73	1993.32	1074.2	926.198	864.226	1234.58	1483.66	1679
LSS	2592.25	1622.99	2150.76	1675	1873.09	1636.01	2112.78	1648.81	2054.38	3551.82	1766.68	1255.39	2045.98	2341.75	1691.3	2598.62	1943.61	1863.48	1889.78	2015.8	1967.15	1626.38	2103.47	1682.02	1863.03	1965.61	1994.59	2188.44	2028.36	1853.79	2014.41	1818.49	1942.63	2039.67	2217.25	1593.96
LTA4H	8865.68	9364.77	4966.93	7824.3	5218.93	8092.72	8867.58	8634.93	8598.9	7394.34	8412.33	5222.92	7799.52	8086.9	8730.61	6039.88	8621.94	7818.09	8082.44	5737.18	9452.82	8857.71	8062.34	5847.95	7685.1	10099.3	7539.58	9203.58	7609.36	6013.6	9428.38	8373.06	9293.79	9136.75	8112.39	8329.99
LTF	5135.29	4182.25	4191.29	4641.52	5536.88	4682.57	4539.91	4553.33	4384.27	3563.31	5346.48	4477.95	3995.9	5148.89	5236.99	6208.5	3902.14	4489.09	4295.55	4982.71	4422.75	3861.36	3954.21	5626.25	4862	4500.45	3349.76	3021.91	4107.74	3007.8	5046.13	4988.91	4264.92	4601.41	3743.65	3374.04
LUC7L2	1317.47	1498.97	1736.97	1097.83	838.854	1329.1	1043.37	787.338	1056.5	697.18	2587.6	1763.17	1219.59	2205.94	1865.12	4059.93	1460.6	1947.07	1097.24	1767.54	1325.04	444.856	1737.38	445.859	1754.84	452.665	2091.79	2248	1836.86	2002.26	1768.04	1142.66	1098.94	1717.35	1797.75	1332.76
LXN	4648.42	5808.44	3825.63	4931.77	4576.14	5030.37	5169.94	4262.22	4443.05	2471.23	4054.85	3092.08	5327.59	5352.13	3930.41	3529.26	6170.94	5247.53	5153.6	6264.25	5145.42	5073.07	7159.53	5709.27	5262.12	3528.89	5002.11	6102.83	3373.95	5716.94	4610.04	5120.15	5159.23	4660.94	6299.12	5501.38
LYPLA1	6420.24	6679.58	7117.24	4895.06	7488.15	7463.67	5963.73	6406.8	6894.85	5982.67	7341.21	6485.88	5767.45	5170.95	6798.19	4547.18	5787.25	6052.05	6228.88	4452.69	5160.15	6678.46	5711.55	5728.11	6989.45	5460.54	6019.01	7849.11	6516.86	8348.06	6269.56	6415.44	7043.96	5676.43	5866.11	5765.08
LYPLAL1	2886.73	3394.67	3396.08	3238.27	1688.31	3316.78	4105.03	4297.96	3483.9	4693.49	2910.97	2381.13	3874.54	3830.37	3542.47	2655.46	4348.82	3710.86	2968.94	4022.94	3071.42	3391.93	2986.9	2277.64	3263.87	4022.64	3996.28	3531.26	3422.27	1777.44	3673.06	3347.52	3580.75	3257.93	5266.47	3288.33
LYSMD2	945.984	802.341	1769.63	661.066	1805.32	1225.08	1431.82	1313.93	1029.72		814.7	978.928	1019.67	1863.49	1672.7	1135.54	1310.77	1072.95	376.067		999.098	660.567	986.525	566.881	935.559	955.689	1068.28		1018.81		872.423	738.357	795.827	964.625	997.32	550.159
LYZ	978.063	896.585		1771.75					1165.31				309.457	485.606											3138.75					2877.35		545.681	1288.46
MACROD1	3398.08	2567.37	4777.93	2789.41	4002.39	2626.01	2704.51	2524.17	3125.09	2246.3	3086.99	4428.9	2429.94	2540.57	2205.61	3579.57	2387.73	3022.82	2307.74	3230.15	2624.05	2869.63	3109.55	3388.74	2381.25	2545.44	2634.81	2265.14	2881.05	6056.07	3039.6	2514.6	2452.51	2598.98	3249.96	2950.14
MAD1L1					493.157			1277.83	1230.6				868.661				758.049	1366.47			840.195			1249.54			478.919	687.464			1421.57	1302.09		1080.29
MAD2L1	10058	9750.55	5130.91	9071.07	5378.9	10940.8	10776.8	8520.61	10672.2	13720.8	9144.7	5254.51	9418.4	10385.3	8456.73	4212.51	8914.29	10539.2	6336.99	6358.85	9604.43	10332.3	9441.51	4691.57	6815.91	12411.9	10197.8	9227.55	9769.9	4550.88	8023.33	8691.97	10834.7	11277.5	10834.5	10486.2
MADD	828.717	458.035		668.257		439.821	1171.01	875.757		679.448	599.348	363.025	350.46	591.15	697.298		689.704	536.194	814.635	667.602	599.798	484.231	586.763	880.15	820.678	507.737	626.557				610.403	588.265		539.846	512.714	755.973
MAEA	106.364	311.01		539.002		493.448	367.073	715.449										296.407	364.238		767.118		360.967	516.445	404.513	474.735	341.082				522.759	369.293		254.027	626.362	447.341
MAGT1	2921.42	2681.95		2451.52	1164.84	4073.09	2637.61	2456.81	3306.56	3099.76	4210.3	1454.93	2751.47	2937.38	2861.49	1482.6	3416.29	3329.44	2311.44	2160.01	3705.5	3062.59	3064.86	2014.3	2990.4	2593.15	2885.65	2866.78	3265.39		3525.95	3414.25	3512.85	3131.04	4115.41	3296.37
MAIP1	1175.76	1226.64		880.111	480.368	852.155	919.305	748.639	588.636		890.43		977.876	1070.56	1034.31		544.815	925.811	858.337			961.936	1168.25		884.209	804.041	1282.3	2094.2	1142.72		1044.08	1102.83	872.94	839.886	912.574	1091.14
MAL2	2189.99	950.881	2742.85	700.852	1217.5	1747.15	2120.01	1469.79	2103.37		1680.85		1615.15	857.97	1296.86		2284.3	1222.24	1418.24	1284.69	1270.29	2302.61	1536.91	1376.65	1157.71	1108.13	997.587		1288.75		1751.22	1969.62	1980.89	1904.82		1807.08
MALSU1	1712.44	751.396	651.108	1018.5	1257.12		844.807	1042.09	792.991		892.779	1403.85	1105.05		510.444		1399.95	474.256	997.349		1361.72	1406.34	1338.55			954.65	1262.81	1143.81	998.796		540.642	769.217	320.852	726.67	1455.14	962.542
MAN2A1	1055.74	695.612		1281.35		1424.64	966.658	1967.9	1650.94	2247.45	1027.48	452.329	1487.9	1375.23	1595.68		2370.42	1133.57	1035.2	713.493	1920.62	2097.57	2162.97		1214.44	1435.51	1475.55	1771.13	1250.49		1816.77	1180.51	1281.88	958.183	1993.91	1069.31
MAP1S	1174.75	646.009	768.494	816.381		988.562	823.268	890.145	992.895	553.943	869.824		910.269	878.647	888.648	853.253		786.059	840.787	938.209	856.395	1081.47	1049.45	777.159	1008.01	943.859	926.806	380.594	1145.13	470.026	542.912	880.515	1007.93	1108.12	1008.99	820.398
MAP2K2	1124.41	740.415	1022.59	1487.58	508.178	1120.24	851.131	1318.16	910.595		945.428	787.889	483.691	772.657	962.591	502.753	874.46	681.054		687.506	676.619	744.146	993.981	794.913	987.334	752.759	970.885	448.575	1426.58		801.837	740.365		713.562	906.36
MAP2K3	1229.16	968.895	857.353	768.282			837.276	876.106	652.119	1273.82	535.99		817.97	546.622		528.359	826.782	534.09	741.622		830.15		776.585	458.516	455.286	519.507	746.676					924.416	557.186	922.249
MAP3K19	885.095	954.588	2539.4	3971.68		2366.34	1070.92	1805.64			2003.52	2298.51	2093.55				1444.95	72.3616	1863.2	2870.43		2287.64		1565.62		1516.71	1453.3	2413.46			1567.38	1550.35	937.792	835.308	1962.28	2095.57
MAP4	2221.65	1066.93	2655.46	1390.05	2426.03	904.203	2096.52	1526.38	1775.59	1567.51	2174.84	2731.4	2010.61	2345.69	2603.52	2768.62	2021.27	2024.49	1856.08	2658.06	2260.86	930.922	2404.04	1700.87	1709.62	1839.79	2199.15	1342.32	2607.96	1231.48	2157.09	1886.36	1962.78	1977.8	1352.47	2231.76
MAPK1	728.945	550.122	966.393	854.461	995.977	1022	473.774	553.53	1083.7		1100.72		1204.02	940.689	1275.63		1276.78		1388.87	624.192	1148.49		667.653	665.271	1235.37	756.946	1560.28		1149.39		713.222	991.009	1870.76	755.971	824.678
MAPK13	2023.15	1624.11	2405.6	1670.4	3518.1	1806.08	2627	1395.85	2188.68	2931.02	1715.29	2215.31	1847.75	1723.14	1429.91		1046.28	1967.56	2308.9		1694.16	1696.51	1712.37	1310.3	1755.49	1588.79	1307.87		1555.3		1852.11	1782.73	1829.83	1456.05	1212.97	1578.14
MAPK14	2400.25	2337.9		3234.14	4434.55	7048.05	2186.99	4339.56	3643.14		2778.89	5935.07	3498.63	3592.23	5198.3	9103.3	3557.45	2769.62	2846.25	5578.37	1692.77	2705.08	1432.47	2301.62	5296.29	2926.14	3527.66	2264.19	4004.56		3154.34	3682.9		2372.02	3689.09	2322.33
MAPK15		2444.63					2832.17		2848.72			4694.79			3654.06						696.948	929.925				2210.6			3873.37			1209.82		2389.07	2642.77	3208.1
MAPK3		703.087					739.206	802.88					323.932																			832.826
MAPK9	619.96	1011.12		676.439	366.348	1073.68	933.98	1149.49	1188.31		964.631	775.762		791.886	846.022		519.975	643.888	993.236		824.411	927.884	765.427		820.1	781.532	289.462	619.552			770.649	1006.64		647.763	989.341
MAPRE1	1531.27		1444.3	514.551	1820.39		1653.01	790.225	1096.46		1272.77	2469.46	1611.37	1327.23	1661.52		1358.19	1769.36	1422.39	1322.15	1515.01	738.155	1256.97	556.125	852.496	789.808	1809.78		1434.72		1238.63	1383.24	793.278	1591.95		1613.36
MARK2	515.11	377.252	513.029			697.635	343.618	801.059	560.257	869.565	508.502			533.605	860.157			573.879			476.603	580.508	851.376			626.281	573.677					545.266				683.307
MARS1	12587.2	11961.8	10918.3	11129.3	9419.21	11675.9	11318.7	10309.5	10942.9	10731.1	9492.13	8980.18	12174.9	10962.3	8860.58	7869.85	11283	11159	13775.9	8810.07	13892.4	14228.8	12701.6	13064.9	10575.8	12032.2	11600.2	12734.5	12865.8	13016.3	12686.2	13251	13219.6	10991.6	10871.7	13177.1
MARS2	593.248	579.479		848.861				710.344					524.438	277.618			587.475		658.619	551.189	666.526	584.921	774.55		1118.29			288.672			915.69	791.313	413.799
MAT2A	14851.4	17168.3	12270.9	15258.3	13165.7	15274.5	15831.1	14746.9	15657	13703.7	16105.5	13390.7	15336.3	15752.1	11919.3	11045.1	13673.2	12735.2	15163.6	16407.7	15771.3	13948	15360.7	15920.6	14479	14854.1	13349.2	12977.7	13379.7	11458.4	12190.7	12822.1	14120.5	13608.1	11302.9	14807.5
MAT2B	7971.03	9255.58	7609.41	11529.7	9909.73	7364.51	6359.07	9559.74	8246.03	8160.04	8049.71	9766.5	9877.4	10357.9	8443.09	10357.8	9926.52	8512.18	8699.57	8828.74	7096.45	9109.97	9696.1	8754.1	9866.5	9472.48	11103.4	8931.76	10917.4	10341.5	7416.67	10297.8	8295.33	8522.44	9182.28	8928.49
MATR3	1201.76	1055.26	779.652			1140.25	1622.98	1737.44	1580.31	912.357	1357.22	716.987	1437.7		1314.89		1370.87	865.008	1610.82	1183.29	1567.02	1771.73	855.271	1017.34		901.563		693.338	1102.9		1574.03	1591.69	1402.05	1648.58	1187.06
MBD5			371.465		990.003	779.207	250.664		632.548	2452.07		461.095	779.036	599.271				771.927	1293.36		498.866	430.688	617.916	602.495	517.963		595.324	1360.67				501.086		646.887		705.516
MBLAC2	1011.19	928.563	1055.11	1591.43	1546.02	724.086	1088.08	813.013	809.961		1205.11	1267.71	1100.47	878.531	625.198	1596.23	814.595	778.037	622.447		737.563	714.053	1285.92	2096.04		1273.7					891.581	1035.39		1055.99	808.17	891.959
MBOAT7	3568.51	2664.51	2955.65	2190.51	3199.94	1731.55	3667.46	2565.63	2582.57	1849.34	3883.89	2346.68	3838.06	2930.74	2823.15	1691.81	2806.12	2355.02	2997.8	2730.67	3862.81	2763.79	3139.38	2813.32	3151.92	4028.06	3986.16	1877.6	2366.75	1125.43	3825.47	1922.37	2881.23	4012.76	3811.91	4054.46
MCCC1	3226.67	4504.37	3696.85	4405.16	4348.45	3816.24	4019.1	3374.45	3728.65	5134.79	4074.34	3632.76	3201.94	3799.07	3465.17	3978.56	3382.36	3918.86	3992.25	4533.85	3302.54	3555.76	4232.49	4303.32	3970.35	4481.47	3070.12	4110.12	3708.41	4902.95	3448.17	3511.84	3081.59	3265.49	4416.63	3664.7
MCCC2	13867.6	15673.4	14062.9	17329.5	13821.6	14510	15215	14982.1	14357.2	14567.2	16631.9	15929.7	15284.2	17722.6	16691.3	15898.9	14004.1	14783.5	14226.3	14724.5	13395.4	14840.9	16296.7	16148.9	16250.5	15935.4	16255	13813.6	16148.6	15352.2	12330.7	14072.8	12999	14541.7	14623.4	16381.4
MCM2	29756.2	32623	22785.8	32041.7	25507	29657.6	32139.2	31095.6	28627.8	27241.2	32547.4	23985.5	31155.9	31145.3	29289.9	23807.7	31545.4	29634.3	30302.5	25198.4	31277.7	30540.6	32337.2	27441	32419.9	33541.7	32514.2	31519.9	31287.3	17990.8	31002.2	31037.2	29411.7	30647.1	30683	31926.6
MCM3	16977.5	18346.2	14832.2	19138.9	18185.3	17911.2	17478.7	16961.8	16324.2	18851.8	17370.3	17808.2	16709.1	17743.3	16737.4	15832.9	15379.8	15198.8	16888	16300.8	16763.7	18990.9	17471.6	17616.8	16221.8	17901.5	16121.8	19940.3	17615.8	15069.7	16023.2	14923.3	17980.2	16495.1	14663.4	17851.5
MCM4	24246.7	25695.6	23083	27328.3	21909.7	21581.1	24535.6	23696.1	24621	27839.4	24574.6	21795.9	27255.9	27122.6	22321.9	18109.5	21754.3	21801.3	23073.9	21953.8	23836.1	26003.8	27379	26071.1	23931.4	23587.5	22763	29129.4	22031.2	23707.1	23407.5	21031.2	23806.1	23142.2	25960.8	25463.6
MCM5	33711.5	36189.9	25915	38861.6	26337.8	27975.5	33797.2	30953.9	30025.2	25743.8	35599.7	34060.4	38398.6	39683.2	33121.1	26312.4	33539.1	37482.8	36336.8	28760.9	37970.6	38207.2	39254.8	35556.7	35495.8	38020	37300.9	37578.4	33179.1	23705.1	32049.1	30127.2	34917.1	32981.9	34104.1	39967.6
MCM6	17591	17048.5	14451.4	18269.7	13412.9	17460.3	17348.2	16689.9	16895.5	16627.2	16306.3	13420.2	16411.8	17425.2	15562.2	12691.5	16971	15427.7	16958.9	16024.1	17196	16683.1	16602.6	16781.6	17441.4	17629.5	15786.2	20376.4	17471	12549.7	18023	17031.7	17267.7	17473.5	16699	17268.4
MCM7	21999.8	27167.7	20609.8	28011.9	22616.8	21209.3	23621.3	21805.9	22116.1	21933.3	23040.5	22387.6	23307.4	23788.3	22149.2	21550	21586.3	20890.2	24862	22179.9	26075.9	27145.1	26715.4	27862.3	24250.2	24166	23249	29841.2	23632.7	26718.3	21118.9	19277.4	24872.6	22716.9	22689.6	24360.6
MCMBP	2947.44	2660.39	2821.56	2288.77	2219.47	2598.35	2892.34	2372.76	2774.32	3394.28	2073.36	1690.07	2876.5	2421.11	2336.17	1803.97	2495.38	2830.27	3057.28	1807.08	2717.96	2497.2	2758.63	2277.95	2242.13	2441.96	2065.33	2383.37	2030.4		2648.06	2589.08	2531.33	2380.97	2531.15	2599.88
MCTS1	369.058	1773.46		1141.53	802.788		550.657			601.296	1353.76								1483.16			864.083						245.498	1593.45		977.488		2145.17	996.36		945.317
MDH1	7777.17	4596.88	5581.05	6637.6	6234.35	7140.42	7190.27	7332.88	8663.29	4139.55	5121.05	5069.45	6271.36	5303.5	5939.29	6130.01	7113.57	5561.63	6047.06	5276.49	5989.93	5569.51	5582.39	4621.29	5303.76	4995.66	5365.69	5258.5	5790.92	3064.13	7128.82	5505.06	5870.45	7910.82	4271.54	5674.27
MDH2	70115	55028.8	68369.7	86088.9	77540.6	65703.1	70767.4	78374.3	69967.8	66509.9	58010.9	63963.3	67290.4	58294.6	66219.4	58356.1	60175.2	63053.3	63578.3	61299	62759.4	60155.3	58905.1	63243	53505.8	58074.4	51485.2	63735.7	56805.2	48215.9	59007.6	54040.8	57600.8	59911.4	52632.8	54953
ME1	2670.97	2155.16	2413.53	2426.18	2332.57	2110.61	2235.8	3027.57	2404.27	1456.35	1852.73	2331.35	2508.8	2122.6	2393.65	2046.13	2312.98	2732.08	2130.02	1734.56	2275.01	2540.73	3179.35	2868.85	2116.07	2565.83	2370.99	2639.11	1751.5	2248.77	2162.19	2332.51	2565.21	2537.85	2380.28	2622.88
ME2	776.433	210.522	1477.95		497.499		458.502	673.978			672.663	341.1		451.569	513.484					1293.15		482.537	447.224	514.782		206.963			246.836		503.515	282.309	546.928	649.642		278.893
MEAK7	1028.73	961.257	2013.71	1071.3	1099.32	957.674	832.083	635.252	1052.31	768.593	870.115	1118.26	1187.37	1125.41	1039.34	753.134	835.192	647.048	1018.08	1197.69	911.057	1098.46	1078.91	1452.13	1519.08	770.012	941.024	1124.35	794.55	1751.18	1520.73	1078.64	1590.31	1011.38	1153.13	1397.05
MED20	1761.42	1316.4	1747.16	1658.63	1274.02	1609.16	1865.56	1275.34	1641.53	1652.36	1873.79	1597.42	2145.91	2084.86	1898.55	1960.12	1742.54	1800.49	1788.63	1324.61	1850.28	1212.96	1689.1	1495.91	2292.92	2675.79	2382.7	1141.05	1524.86	2952.21	1499.68	1334.58	1606.25	1771	1916.24	1368.01
MED25	901.304	453.641	1859.85		1830.74	153.033	337.907	490.608	589.887		476.302		646.883		565.472		275.083	332.587	724.462		952.069	567.606	1402.93	1153.12	395.162	587.313	891.546		665.432		886.719	489.582		550.18		678.846
MEMO1	2877.73	3922.93	2127.27	2860.06	2810.79	3212.24	4597.23	3192.54	2869.64	4403.39	4145.04	2663.1	3698.33	3643.18	3603.58	2260.65	3230.11	3469.01	5178.08	2841.77	3999.04	3293.27	3780.3	2330.53	2398.65	3586.72	4169.64	3722.83	2873.8		2955.6	3578.75	2788.53	4053.23	3650.8	3322.74
MEPCE	5637.72	4225.54	5341.1	5275.48	3617.78	3633.1	4941.51	5929.28	5511.72	4183.3	5631.89	6954.8	5232.54	4582.5	6424.28	6687.96	5692.9	6558.43	5556.43	5915.62	4925.95	3773.7	6021.69	5318.77	5785.59	3317.13	4162.02	3231.04	3380.05	6030.91	4070.42	3899.75	2634.11	4072.47	3661.64	4053.18
METAP1	5343.33	7467.09	6667	5398.53	8065.75	6366.57	6124.84	5492.56	4977.18	6686.08	5945.12	6842.18	6756.56	7801.85	5853.46	8040.11	5830.6	7233.14	3340.45	7894.51	6008.24	4877.76	6173.29	7626.34	7698.6	6049.49	5268.35	7568.85	6213.81	6183.46	4851.47	5751.65	6158.92	5946.96	5792.78	3643.81
METAP2	826.555	828.622	2664.95	790.152	789.451		819.061	1254.22	680.299		1274.33		875.926	609.324	1657.19		723.494	1186.59	1444	580.61	1444.38	1319.78	2293.4	1198.59	871.747	810.172	939.689	1189.27	783.265	2535.46	966.061	1016.83	1011.29	899.09	932.093	1327.13
METTL1	3124.42	2260.64	4382.68	3293.8	4770.34	4015.82	3667.72	4015.28	3904.43	3828.71	4603.16	3608.6	3432.01	3480.83	4188.43	3635.23	3297.69	1950.82	4159.43	3144.55	2947.1	2649.24	3667.72	4183.72	3507.39	3368.76	3795.36	2302.88	3298.39		2797.93	3345.13	3171.22	2127.36	2469.22	2979.09
METTL13	1983.5	2531.98	1330.89	1709.68	990.931	1578.06	1454.53	1400.27	1467.42	1245.15	1469.56		2517.31	1770.27	1144.99	946.862	2116.7	1810.81	2274.64	2470.94	1782.75	1295.58	2413.05	1762.2	2336.57	1245.79	1481.11	1783.14	981.366	1513.27	1008.76	2583.75	1812.25	941.983	2321.21	1041.16
METTL16	645.238	533.174				469.485	529.674	606.907	804.421				626.531		550.547	343.882	512.079	652.899	744.718	995.267	709.854	691.366		748.392	287.851			682.461	435.128			473.536	1032.01	687.521		343.015
METTL2B	244.465		530.435	347.135	364.155	387.654	421.037		234.486	560.173					318.65			361.67			298.528	323.228	318.915								479.473		167.891	313.761	254.123	224.565
METTL3	1527.4	1295.24		1004.27	633.733	486.823	971.643	1472.27	1388.18		1143.79		1531.4		1519.38		1260.29	1225.05	1439.46		772.092	857.299	835.448	913.043	1394.44	1241.71		1232.21	745.355		696.314	1056.47		940.321	1223.21
METTL5	8020.55	6413.86	7524.74	7677.06	6682.42	6300.61	7954.02	6812.03	6545.96	8952.23	9365.68	7751.57	7977.14	9915.09	6074.92	5229.76	9001.76	6823.1	7078.88	8806.2	7640.41	7858.91	7823.49	7036.33	8865.15	7601.65	9591.87	8796.37	10250.4	3220.55	7567.98		4270.17	8780.49	9989.46	10950.2
METTL7A	3725.09	3731.15	2034.92	2288.85	3832.04	3734	3742.33	3603.49	3324.62	4011.12	4489.77	3109.49	3755.2	3608.88	3230.49	2815.12	2858.09	3678.53	3588.24	3206.77	3699.52	3677.91	3070.91	2709.42	2828.63	3823.66	3202.25	3145.83	4018.4	1128.47	3216.52	3964.32	3397.42	4530.59	3020.21	4105.35
MFSD10	972.967		813.184	277.069	508.144		834.96				710.453								1234.33		772.844	1210.81	550.186	660.891		964.146					635.462		731.005	366.024		1100.7
MGAT1	1768.8	1474.31	1568	1829.29	1484.27	2260.58	1753.03	1471.24	2010.2	2597.65	2476.59	1961.18	1865.72	2411.94	2089.65	1644.16	1949		2383.22	2439.31	1620.91	1638.14	1619.34	2603.44	1532.25	1924.25	2603.07	2323.23	1857.88		1675.32	1849.44	1012.62	1931.92	2100.72	1348.98
MGAT2	657.006	903.816				610.8	555.382	532.611	737.778		430.221		750.077	986.819	973.35			1034.69	753.16		1208.87	534.846	1235.06			802.416	1670.1	747.236	523.407			505.96		613.343	804.393	1331.97
MGST1	7363	7112.44	3696.34	4772.08	2316.43	3478	6775.62	4656.08	6076.58	5947.52	6491.51	2974.43	5435.35	6731.24	3796.4	2704.51	5638.53	7088.81	5793.35	2787.57	7471.52	8348.32	6052.25	5162.37	3576.92	7412.57	6205.05	7196.88	4325.11		6793.28	4516.67	7246.92	7731.27	4632.42	7173.2
MGST2	13667.2	8701.04	8707.12	8737.47	9318.24	7870.78	11282.3	11708.6	14754.4	8788.01	14898.9	7386.14	10592.1	9059.38	10795.9	9122.54	10865.4	11207.8	12092.4	8543.61	11710.2	11018.7	12018.7	7567.09	8961.31	11951	11479.7	8185.04	11945.4	5298.88	11353.9	11594.7	10979.2	14202.1	8495.19	11935
MGST3	890.003			721.581			853.294		801.993		1754.54		577.285	998.468			836.717	526.636	767.465		626.495	1312.55	1201.28	544.592		673.828	1139.79	1406.28	472.321		1365.15	340.594	1206.31		866.893	698.063
MIF	22367.8	8956.66	36621.1	13038.3	34992.4	6220.54	21192.4	13413.8	14051.8	5123.68	31303.4	56223.6	55224.8	57737.6	32721.8	77667.6	49244.3	53487	45737.6	65848.8	36999.4	11626.7	42388.9	23276.8	47507.9	18042	51231.5	3954.23	36297.6	8361.16	25803.6	24935	36327.6	20829.9	10532.5	40595.2
MINPP1	1128.67	702.838	1350.92	563.671	1588.38	665.764	1345.58	942.291	1305.25		597.072	1681.87	1115.96	918.309	1188.2	1398.6	433.526	502.436	1076.29	958.169	1057.8	1867.25	1144.3	1046.36	826.696	711.167	689.471	709.359	699.705		1208.52	1385.93	1007.41	715.854	923.756	1135.3
MIPEP	2170.32	1648.35	1807.92	2164.27	1710.3	2653.33	2242.2	2333.66	1701.77	2342.45	2042.91	1688.15	1136.32	1946.6	2075.06	1711.98	1746.89	1778.94	1247.76	2164.61	1125.49	1556.14	1990.26	1073.41	2678.27	1862.33	1310.81	1718.89	1889.63		1840.21	1745.91	1633.39	2260.51	1630.88	1241.36
MLF2	638.817	639.81	931.564	1335.97	665.498	545.366	1025.03	1053.11	409.965	652.21	807.259	955.741	697.637	816.125	777.151	272.991	860.72	841.518	1019.08	731.082	1043.01	730.627	784.579	844.781	811.163	934.532	1042.05		632.988		247.18	1132.54	944.005	574.508	707.422	897.278
MLH1	2909.1	2117.6	3742.88	2234.17	2219	2076.34	2403.74	2320.16	2273.77	2188.82	2409.77	3142.51	2628.37	2427.24	2773.22	2460.35	2142.83	2152.13	2661.32	1540.63	1709.73	2077.52	2947.28	2200.62	3078.82	2358.77	2650.64	2949.96	3171.73	2940.65	2319.56	2497.4	2217.92	2254.38	3285.85	1897.87
MLKL	1947.12	1634.32	2071.17	1540.11	313.629	1241.54	1414.18	1659.09	1526.15		1855.68	1244.39	1363.29	1396.71	1771.92		2071.34	1559.88	1605.58	1356.33	1291.26	1555.4	1620.37	1429.34	1120.78	1589.07	1810.41	1501.03	1890.04		1531.99	1630.75	1365.45	1968.99	1622.89	1229.43
MLLT3				22718.3		14082.5	12335.3	13075.1			20025.7				16522.4	18183.8	14711		21936.3	17613.8	16679.7		17164		20646.2	15111.2				27327.9	15635.5				17043.6	21712.5
MLST8	538.687	613.465	457.431	599.129	523.912	684.962	448.544	793.739	571.349	250.128	580.315	196.33	592.067	275.329	581.346	177.954	786.539	715.718	677.928	1125.26	600.332	681.05	855.321	626.764	755.658	486.299	611.35	487.673	478.52		753.663	711.544	810.179	491.556	1042.08	471.333
MLYCD	893.656	1138.68	736.786		668.81	1233.33	749.762	887.951	947.708	1269.51	1304.6		611.072	1095.06	1281.9		768.971	684.386	885.849	669.014	1255.84	1540.97	777.108	4016.09	627.918	1354.6	954.148	1299.73	1108		792.035	838.651	1046.74	1092.43	1227.16	1160.88
MMS19	993.521	977.84	3675.77			1514.36	1177.02	1043.28	1041.89	918.535	923.388		484.384	830.215	1045.62		1402.86	1037.69	1619.96		1075.23	974.498	1185.67	557.035		1152.73		809.259	1445.02		740.194	967.865	897.199	1091.17	660.773	868.298
MMTAG2	5111.09	4947.13	5440.05	7029.95	5372.1	4638.78	4633.31	3323.08	3047.33		4886.76	3045.22	6499.77	4605.44	5384.06	3497.21	5007.93	3950.24	3455.08	4555.63	4944.09	6247.54	6304.83	7662.21	5623.74	3980.82	8163.95	5751.94	5361.71	7526.54	3485.87	4771.03	4545.35	4842.04	6234.79	5091.9
MMUT	2199.2	2067.05	1430.72	2332.76	1662.81	1581.5	1813.75	1956.03	2187.16	1908.68	1716.72	1191.4	2036.3	1208.22	2613.59	2109.65	1770.44	2387.62	1962.44	1928.58	1906.62	2050.37	2127.82	1868.03	2268.46	1919.16	1700.65	1936.97	2215.67	3534.28	2290.14	2333.76	2253.61	1860.09	1855.27	1701.93
MOB4	1734.45	1835.13	2054.73	1817.76	2052.19	1749.26	1813.41	2590.66	1208.1		3017.68	2035.62	2743.95	1910.34	1555.51	1418.57	1944.14	2019.39	1948.77	2105.57	2379.57	2437.82	2209.99	1544.02	1961	3586.99	2096.94	1422.69	1794.49	2667.17	2007.99	2738.32	1779.4	2491.02	1967.07	1477.15
MOCS2	1071.61	1036.58	2356.59	902.137	1959.65	1747.71	1191.75	1168.39	1374.08	3907.22	916.833		837.511	922.768	1475.83		1430.1	1015.54	1536.31	1994.89	856.942	899.053	1553.27	1349.77	817.718	1239.84	1494.78	1444.68	660.22	2866.39	898.793	828.875	954.555	1025.19	1362.69	1071.03
MOCS3	1193.36	1293.85	1845.03	1014.31	1353.02	1396.77	1312.53	1131.57	1165.39	2231.45	1438.9	1400.01	1116.31	1785.19	1183.6	1359.57	935.48	1310.87	1169.93	1502.9	831.043	1241.03	1392.93	1138.83	1505.52	1441.05	1516.78	1217.66	1126.03	1253.79	1129.32	641.642	1707.64	2005.47	1810.8	865.501
MOGS	4116.08	3474.71	4899.82	4363.1	4574.31	3951.04	3699.67	3328.59	4177.44	3466.87	3434.5	3484.27	3552.45	2808.34	3708.87	4043.92	3600.73	2691.87	3510.47	3079.23	3972.62	4041.34	5518.13	3947.75	3574.62	3698.21	3172.06	4384.34	3467.48	2446.78	4113.47	3682.13	4010.31	4060.31	3193.33	3539.43
MON2	1975.31	2236.21	2335.34	1120.79	2191.77	1670.17	1577.11	2305.44	2274.97	1406.82	1847.6	807.592	1954.05	2450.33	2219.35		2190.52	1874.07	1752.63	1156.53	1228.93	1916.11	1739.05	1112.74	856.19	1439.79	3171.6	1666.11	2144.5		2117.5	2916.72	2222.64	2082.6	1210.65	1331.69
MORC2	595.493		679.504		415.996		181.59				102.378		384.233					163.967	272.179		645.369		842.298		191.138						182.219	185.75		171.674		560.717
MORC3	1947.44	1274.93	1355.02	1139.18	1697.02	1292.87	1286.81	1544.17	1558.56		1756.94	985.309	1277.5	1443.37	1291.66	1182.55	1056.54	1402.04	1871.85	1121.12	1983.84	946.231	1246.38	1153.23	1108.65	1246.85	1587.95	1087.75	1414.63		677.532	664.499	1322.84	1923.25	1589.42	2026.85
MOV10	3449.31	3299.15	3198	3083.68	2302.15	3339.74	3091.59	2743.58	2988.03	3192.01	2738.12	2884.55	3600.19	3851.94	3098.4	3388.77	3564.98	3458.99	3178.14	2828.52	3287.91	2936.29	3724.92	3181.4	3602.28	3305.06	3370.14	2774.15	2620.52	4466.1	3197.62	2569.67	2710.67	3305.68	2886.99	3134.61
MPDU1	1274.1		314.674			570.537	863.623	645.57	640.359		1047.23				674.778		1203.11	948.685	456.312		698.436	1162.33	707.749	326.689		1980.1	537.919	1039.84	866.74		1642.04	1470.29	1154.72	1143.12		1655.79
MPG	962.202	462.19	1202.74	1013.08	1811.49	827.102	756.092	702.94	884.015		610.404	1088.94	1003.76	720.152			1269.55	415.197	1713.41		986.069	832.337	1408.27	1854.38			809.582	966.854	1333.62		1157.62	684.737	961.469	765.762		1146.54
MPP2	755.943	1468.3		1603.36	1354.98	1032.81	831.798	1098.33	1180.75	904.241		1438.8	1157.43	819.037	962.723	897.515	936.284	885.667	957.286	850.419	1209.27		1375.77	1042.43	626.598	1079.38	682.234	646.917	866.863	916.894	995.358	745.638	1015.1	425.231		1389.6
MRE11	2817.24	2107.85	1436.91	1618.32	1922.23	3282.42	2716.21	2294.97	2661.87	2726.11	2272.38	1399.49	2604.99	1983.05	2264.26	2914.62	2430.04	1914.71	2841.05	1956.52	2718.81	1770.15	2894.77	1770.91	1811.23	2553.2	2100.32	2184.95	1732	1638.99	3270.75	2778.09	2061.29	2716.57	1820.42	2171.47
MRI1	1635.94	1566.44	2451.99	1566.61	2361.34	1503.38	1919.47	2737.16	1574.27	1910.75	1436.56	1542.89	1464.55	1819.04	1606.34	2416.62	1139.01	1407.7	1999.02	1843	2266.69	1276.69	1591.53	1660.48	1734.64	2180.26	1260.82	1627.43	1978.36	2379.96	1917.68	1901.72	1695.43	1364.11	2222.24	1900.43
MRM3	1175.4	1232.31	2093.2	1280.23	2657.36	1401.98	1592.45	1263.26	1781.05		1417.66	1966.34	1538.69	1035.83	2124.7	2121.11	1193.08	1557.13	823.659	1507.7	1564.72	870.792	1411.91	1069.71	2160.6	1205.17	998.162	788.27	1220.46	954.083	815.705	1514.34	625.409	1063.44		606.114
MRPL1	2402.12	2464.04	1887.45	1648.18	1609.95	2192.41	2278.51	2736.07	2350.76	1571	2343.75	2117.26	2472.69	1655.75	2273.17	1493.95	1668.36	2607.5	1712.79	1946.73	2335.95	2871.27	2197.07	1722.33	1957.24	2238.49	2113.72	1612.7	2755.46		3076.02	2848.72	2234.81	2573.64	2338.06	1806.09
MRPL12		510.695					1031.63	567.436	894.22		700.234		1053.88	413.319	342.307	514.649	1120.13	769.528			791.195	1226.65	676.134	493.413	631.79	380.623	676.713				953.995	920.516		750.546		1052.73
MRPL13	4183.49	5042.84	4398.02	4235.51	2524.78	4284.73	3293.47	4457.05	3446.53	4127.18	3757.65	3038.16	4940.64	4986.29	4645.06	4672.98	4221.65	4917.82	4371.76	3117.93	4626.23	4363.28	5025.07	4268.7	4513.91	4954.79	5496.17	4785.08	3142.02	2787.74	3785.71	4011.56	4853.65	3394.31	4879.97	4510.27
MRPL14		590.428			593.936		196.324	505.516			326.594			364.911	106.835			213.277	200.577		360.54	372.973	224.225	239.972		458.661	320.353					505.126		672.5
MRPL15	744.949	969.679	2171.52	1292.92	1761.89	846.872	1232.34	988.009	1015.54	395.604	1004.08	2012.73	1693.64	1716.1	909.407	995.676	1361.62	2003.84	1117.09	3176.6	2467.92	1442.83	2027.18	1027.18	1821.04	792.753	1665.93	1386.94	1058.05	954.332	960.892	1279.32	1187.05	1238.38	1415.63	1129.54
MRPL16	1516.32	297.733	1215.46	548.804	2558.95		962.424	390.817	578.193		397.303		604.389	595.698	575.896				778.92		586.594	347.937	631.773	687.673	662.851	726.49					667.07	520.309	490.094	658.171
MRPL18	1321.12	1790.37	1470.89	2174.91	1809.71		2104.34	1546.32	1675.51	1702.75	1491.25		2167.16	1725.85	1928.57	1839.92	1852.01	1784.3	1503.12	952.508	1725.72	1788.03	2021.95	1385.55	2482.08	1916.14		2215.9	2147.56		1783.12	1738.06	2215.71	1697.54		2307.83
MRPL19	6254.16	8023.61	5866.94	7290.07	6830.16	9809.56	6947.64	6729.37	6521.3	6613.43	7972.72	9299.8	7046.64	9202.52	9747.73	11136.2	8831.72	7890.54	8655	11370	7969.53	7009.07	8126.2	7374.4	6043.13	7978.63	9432.03	6731.65	6892.6	6020.56	6877.45	6496.21	7581.26	7718.25	8336.95	8465.55
MRPL20		457.959					178.454		334.091		504.127			375.617	351.239		467.037											219.542		772.23		359.338	731.523	528.3	590.342	519.979
MRPL21	3737.59	4181.65	5763.38	4866.92	6208.21	4954.73	4043.68	4057.27	3181.68	5403.74	2782.48	7137.9	6327.92	4664.4	4762.18	5348.67	4340.41	3908.08	5064.36	6103.26	3660.29	3663.11	3120.43	5237.24	4208.62	4044.48	3269.12	3515.37	5999.99	6708.85	3111.63	2913.16	3693.33	4072.88	5621.75	4645.95
MRPL22	2682.46	2872.47	2895.6	2128.63	1892.16	2130.45	2341.19	2306.75	2126.85	1601.84	1999.78	2280.73	2587.24	2368.94	2290.17	2048.22	1867.66	2165.92	2595.52	1602.61	2576.59	2658.75	2832.77	2309.34	2336.63	2004.56	1466.4	2845.07	1696.49		2416.81	2014.13	2424.18	2725.33	2017.28	2110.17
MRPL23	986.825	1617.73	1427.83	1954.59	2356.89	766.795	1342.1	988.698	1978.8	2307.18	2148.21	1710.48	1509.85	1668.97	1257.44	2787.17	854.266	1059.15	1860.14	3263.46	1566.59	1473.8	1454.86	2136.45	1624.51	1559.94	1985.45	1326.28	2784.11	3185.86	1840.97	2080.4	2067.88	2211.09	1798.28	2468.87
MRPL24	1955.96	1574.3	2084.89	1518.99	1485.41	1533.12	2590.66	1816.64	2022.16		1733.33	1831.53	2068.34	2665.03	1597.46	1316.69	2041.13	2020.56	2487.89	1677.86	3121.29	2332.01	2592.29	1954.51	1642.12	1770.55	2058.85	943.3	1340.55	1625.38	2168.36	2042.85	1896.71	1491.5	1424.21	2695.67
MRPL3	2491.77	3272.95	573.008	2195.67	1797.15	2658.11	2329.9	2708.38	1486.05	2920.11	2286.23	913.656	2810.68	2889.12	2357.8	1867.11	3566.15	3039.69	2436.17	1758.12	2748.39	1701.28	2230.89	1427.96	1960.98	1983.17	2714.07	2033.31	1433.12		2268.18	2043.72	2786.29	2123.87	3597.45	2324.71
MRPL37	3172.56	2841.93	1788.83	2883.84	2301.08	2760.4	2250.97	2271.67	2693.16	3074.09	2729.58	1896.3	2280.71	2711.67	2917.03	1971.23	2392.71	3318.53	2874.69	1936.59	3044.97	2559.16	2363.2	2255.75	2599.5	2109.39	2312.29	2378.53	2606.95	4132.35	2894.08	2615.64	2817.13	2892.34	2196.71	3343.53
MRPL38	805.45	637.844	1243.38	395.879	1302.96		831.729				1293.49	601.583	694.363	785.853	1193.35	569.242		508.899	806.612	1417.5	879.959	873.22	1030.63	1068.65	639.044	618.607		944.919	774.651	657.739	2469.21	378.78	941.115	1183.69	1054.19	1094.81
MRPL39	3181.43	3751.8	3584.68	3680.58	3160.77	3191.61	3527.05	3263.77	3890.52	3933.32	2656.15	2426.51	3258.17	3698.29	2958	2825	3402.2	3706.68	4150.51	3405.38	5313.22	4107.63	4770.14	3640.2	3885.17	3503.89	4086.07	3608.67	3214.47	5699.88	3451.51	3195.7	3970.03	3418.53	3986.54	3293.14
MRPL4	2720.99	2118.29	6379.18	2489.04	2903.49	1352.09	2479.58	1439.27	1417.09	2554.52	1491.31		2137.13	2118.49	1927.78		1571.17	1626.81	2535.31	1629.88	3029.2	2864.57	3757.83	2994.18	1940.03	2502.81	1817.09	3812.49		2035.62	1838.01	2109.39	2351.51	2366.63	2341.57	2759.5
MRPL44			151.778																		77.9825		114.063
MRPL45	2923.98	2921.5	2574.92	3456.32	2736.61	3191.24	3703.38	2775.85	3301.81	2188.65	3855	3149	3292.7	3252.31	3755.05	2135.28	4498.06	3101.22	2665.51	3440.05	2388.6	1912.76	3276.34	2549.11	3685.64	3194.79	2758.48	2688.86	2799.61	5791.74	2608.13	3215.16	3085.36	3349.48	2642.89	1630.38
MRPL46	1288.78	1283.56	1443.65	1525.84	1595.55	985.646	978.029	1476.7	743.682	1040.08	1042.94	1639.96	1515.2	1094.98	1497.59	1299.71	1107.87	663.526	888.96	1739.28	920.889	1467.47	1003.89	1355.59	974.075	885.845	1255.93	1411	1228.08	3165.07	1502.28	1300.46	894.568	1106.72	1198.69	1141.82
MRPL48	2157.47	2005.54	2033.44	2066.9	1314.2	2033.94	2980.24	2854.38	3181.6	2381.14	1753.37	1856.54	2070.5	2105.94	3343.36	2165.9	1935.22	2955.51	2012.19	2482.44	2045.19	2113.65	1164.12	1627.96	2531.42	1653.03	3281.99	2894.11	1977.36		2014.64	1737.79	2878.44	1796.25	2272.1	2668.81
MRPL58	2860.15	3735	2345.81	2490.28	2300.67	2211	3140.68	3246.09	3678.5		2728.87	3137.19	3855.19	2507.67	4319.89	2316.2	4188.38	2815.1	3298.98	2920.72	4022.91	3168.12	2847.44	3965.96	3158.02	2958.5	3645.69	3807.89	2871.55		2927.29	3357.48	3498.72	2979.42	4602.87
MRPS10	2144.13	4155.78		3915.85	3899.97	4054.38	3688.84	3812.65	2470.64	2801.77		3980.88	2283.74	3470.01	3301.03		3254.88	3006.04	3345.57		3001.41	3450.84	2039.13	3069.36	3859.11	3902.82	4044.76	3018.01	5954.92	1985.42	4011.75	2874.48	4781.1	3843.62	4005.33	3615.87
MRPS11	2815.73	2639.87	2180.8	2750.15	2523.42	909.126	2321.78	1896.58	2344.1	4594.24	2706.34	2057.22	1889.08	1956.71	3144.08	3004.16	1815.23	2179.35	2288.84	2273.6	2451.33	1390.95	2647.97	2402.92	3156.69	2330.2	1576.51	2331.45	2292.27	3601.48	2249.11	2016.66	3160.59	2876.77	2436.63	2935.15
MRPS12	4219.17	2630.27	4988.16	3821.81	4734.38	3243.94	3470.98	3962.04	3811.69	1737.75	4718.4	6772.49	2727.45	3552.99	3549.08	5421.42	2996.89	3997.86	2807.45	3494.56	3428.45	2454.79	3683.14	4121.42	3835.64	3511.37	3688.97	2380.76	3636.81	3141.15	2266.52	3328.83	2545.51	2738.06	4047.73	3836.59
MRPS14	485.77	630.372	870.178	401.557	736.267		360.271	816.863	688.626		501.199	890.138	504.263	736.961		653.888	734.569	279.632	260.038	549.848	512.391	223.584	501.713	1119.32	394.153	478.089	561.137	307.776	831.68	434.504	359.949		345.375	687.501		1154.95
MRPS16	180.614		978.039																		437.243	298.301	280.125
MRPS17	1602.79	716.083	316.893		732.46	542.6	1181.15	1180.62	1009.41	862.371	1466.28		879.777	785.57	824.172		1209.48	1157.8	984.492	878.035	1134.48	898.206	970.467	734.235	580.479	1597.6	913.035	1035.12	837.878		637.115	740.68	1146.33	697.951	1515.89	715.703
MRPS2	2749.05	2389.19	2728.28	1513.76	1356.09	2209.63	2242.78	1671.73	2131.2	1650.02	1667.89	2788.18	1828.83	1861.29	2130.55	1349.71	2758.19	1928.69	1617.05	2509.43	2004.72	2064.73	2019.54	1470.12	1807.12	1946.69	2201.35	2455.12	2322.39	1280.98	1614.85	1949.86	2055.39	2205.22	2247.53	1848.55
MRPS21	418.531	567.85	458.128	651.927	313.762	339.469	699.226	281.742	284.797		224.463				501.027		475.346	373.432	450.088	295.081	237.297	149.022	288.507		780.532	244.579	621.698	206.29	237.293			413.367	358.96	258.863	187.75	271.447
MRPS22	3031.88	2761.63	2507.65	2664.82	2823.02	2638.79	2374.18	1992.09	2360.1	2340.74	1510.17	2346.75	2303.89	2220.9	2265.76	2523.56	2619.96	2552.75	1866.36	3064.13	2416.93	2527.73	2430.49	3112.67	2290.91	2453.01	2114.57	2943.14	1811.33	2621.18	2591.08	2267.41	2593.09	2301.04	2576.14	2057.2
MRPS25	1693.8	1576.36	1748.47	2081.64	1950.46	1718.78	1974.54	1704.68	2376.46	3973.54	1358.46	1567.02	1121.52	1341.83	2962.66		1926.32	1817.31	1393.81	2156.23	1160.11	1474.77	2037.82	1147.12	1676.91	1937.46	1311.34		2029.04		1568.71	1240.05	1695.25	1441.64	1953.96	2021.16
MRPS27	3004.1	3450.85	1852.89	2668.78	1474.39	3173.75	3009.69	2975.58	2904.29	1332.9	3265.2	2700.48	2916.49	3125.93	3644.32	2874.6	4125.47	3759.25	3594.76	2656.57	3616.84	3542.74	2871.01	2387.53	3377.48	3626.68	3077.89	2567.53	3537.9	1276.43	2665.35	4121.02	3289.32	2955.32	3651.91	3085.78
MRPS28	2442.74	4048.84	1409.24	3712.89	3275.27	2657.81	2724.69	2036.07	2801.43	2018.34	2101.91	2899.74	2871.02	2620.86	2082.33	3740.73	2430.24	3575.19	2551.45	2844.94	2708.75	2218.83	3100.9	4396.73	3526.81	3226.06	3540.1	3362.2	2242.82	3228.95	3197.14	2890.81	3640.18	2099.24	2896.51	2553.69
MRPS5	431.376		966.714		410.206		673.079				217.877							312.084	550.65		541.369	363.97		437.781	381.623	327.761						598.404		622.673		486.256
MRPS9	1799.64	1402.25	1915.72	1699.26	2262.48	1517.7	1928.3	1739.2	1831.19	922.89	1846.02	1880.78	2116.68	1937.47	2384.86	2490.72	1998.47	2005.84	1941.93	2541.22	2347.47	1372.92	2175.81	1817.55	2151.37	1508.34	1775.13	1100.77	1516.31	1665.91	1621.8	1514.3	1983.36	2022.83	1404.3	1398.8
MRTO4	1410.49	1434.45	488.121	1079.45	836.893	930.03	1481.23	1055.99	1018.55	1828.91	699.404		1410.62	1341.36	1343.81		1309.89	2059.31	1339.18	1185.19	1322.84	1270.18	1505.86	879.296	830.863	1049.67	1356.6	1522.55	946.263		1264.39	2497.38	855.326	1158.17	2186.08	1154.34
MSH2	7080.64	6652.87	4750.49	6656.13	4572.01	6978.25	6607.28	6687.25	6661.32	6328.37	6490.8	5523.4	6107.97	6475.25	6344.63	5524.6	6054.15	6291.96	5877.92	5559.74	5935.81	6411.18	6362.41	5853.33	6449.8	6491.23	5805.74	5652.57	5539.59	4956.48	6410.18	6072.83	7003.92	6365.84	6198.91	6474.88
MSH3	2531.02	1673.45	2620.64	2586.71	2015.98	1730.72	2469.41	2182.52	3028.64	1995.15	2653.91	1432.24	2023.07	2610.23	2616.86	2109.7	2262.31	1843.84		1706.34	2160.38	1411.36	2232.04	1945.36	2000.45	2324.29	1959.48	1815.08	1924.94		1999.74	2018.2	2240.41	2386.3	2386.84	2133.12
MSH6	8678.72	8070.18	8500.06	7395.56	7725.03	8213.22	8947.29	8209.77	8724.04	7042.12	7792.45	6420.73	7413.03	7388.49	7398.48	7471.52	7691.08	7655.28	8079.82	7039.1	7742.61	7499.09	6674.27	7397.1	6880.16	8197.33	7484.13	6634.17	7705.44	7981.26	7820.08	7458.56	6639.88	7420.76	8596.12	7739.84
MSRB2	1532.33	1152.77	862.219	1124.21	1325.87	1055.53	1483.6	1563.42	1126.53	2460.09	941.42	1846.2	1740.33		1673.71	1922.58	1415.96			1461.07	1236.19	1299.74	1286.94	1913.13	1153.82	1603.53			832.253	2125.48		1093.49		715.392	1279.49	888.563
MSTO1	1608.52	1504.41	2379.47	1018.69	1336.92	1340.79	1544.91	1540.25	1563.14	2054.18	1450.69	1315.11	1699.9	1000.85	1058.78		1564.86	1697.63	1711.66		1665.51	1276.72	1949.59	1422.81	1375.69	1538	1166.06	1568.36	2650.1	2908.84	1380.63	1571.06	912.986	1906.5	1418.32	1319.4
MT-ATP6	2872.97	2817.84	716.87		335.54	1690.53	2951.99	1584.7	2522.37	2989.06	2753.84		1914.61	1437.15	878.967		2193.47	3058.31	2505.65		2494.05	3350.77	1441.2	1101.69	1385.23	2385.09	2445.22	2580.21	1765.01		3703.12	1806.07	2446.59	3082.71	1660.55	3703.08
MT-CO2	69621.6	52835	83774.6	53238.9	72998.9	53514.7	60634.7	42947.4	55998.4	38637.4	38073	47362.8	38837.2	29931.8	39857.2	28156.6	46976.9	35468.3	44112.9	44931	39383.5	52890.6	51667.1	72405	34238.8	66832.8	21016.8	67120.4	56115.6	32332.2	55420.9	41569.1	61760.7	60719.9	33179.4	54701.1
MTA1	425.786	627.226	635.462	556.036	573.458	392.249	617.187	711.287	1218.35		317.911				707.358					922.646	552.489		562.45	486.859		523.651					473.719
MTA2	8548.96	6332.77	9799.94	7182.02	7848.92	7320.5	7623.69	6672.01	7461.8	6426.14	8203.16	8009.74	7446.83	7889.94	8188.53	7705.76	7443.3	6142.68	7450.05	7365.05	6598.13	6795.65	8013.33	7463.02	6862.81	6390.39	7209.58	5785.15	6746.88	5513.23	7412.99	7787.97	6283.48	7618.25	6879.25	7991.8
MTCH1	4461.17	3970.07	5688.04	3956.34	6075.83	4419.73	4409.23	4042.4	3853.85	2989.85	4999.52	3480.23	4516.29	4352.53	4079.55	3613.29	3768.19	2785.85	4628.67	3374.15	4352.02	3461.12	5543.01	3196.28	4542.74	4527.64	4700.75	3868.53	4139.67	2540.67	4051.5	2608.46	4205.1	4364.71	4982.29	3629.5
MTCH2	1584.4	943.622	2708.29		2880.42	2676.64	2613.45	949.43	3079.87	2915.87	792.79		1752.98	1743.39	3878	2563.52	3424.42	2751.22	2508.56	3754.97	1301.75	1340.21		2057.03		230.082		1323.05			1624.35	1769.21		452.183		1130.16
MTDH	1977.96	1423.24	3853.35	1284.5	3708.01	876.633	2512.04	1332.16	1403.97		2463.22	3233.89	2604.46	1620.79	2216.13	2475.21	2299	1538.63	1303.92	3269.24	2112.92	1386.26	2318.91	2092.65	1978.12	2711.06	2328.1		2421.88	3305.43	1915.21	1800.49	2113.69	2291.97	1933.69
MTHFD1	39669.3	37746	42434.5	37069.7	40794.7	39855.7	41101.4	38074.6	41697.3	33576.6	35015.1	35093.1	35672.8	36193	38686	33319	37470.1	35091.7	37499.9	34440.7	39927.4	39738.3	38846.3	39696.8	37880	39709.5	37576.4	38780.2	41375.7	33714.9	39501.2	38040.8	38325.6	38958.9	35841.2	35697.4
MTHFD1L	5927.93	5514.4	4394.82	4850.31	6082.51	5192.06	4858.68	5115.26	5463.05	4148.46	4986.92	4979.56	5508.23	5292.04	4977.87	5947.01	4577.91	4296.85	4889.91	4020.68	5303.33	4752.61	7047.49	5234.29	5991.66	5951.93	4948.7	5461.4	6010.26	5009.33	5515.03	5437.2	4810.14	5348.31	5774.47	4435.98
MTMR1		499.845	747.171	536.081	651.82	694.125	506.762	873.495	529.881		653.382		561.885	568.507	825.471		401.652		330.285		575.256	637.198	603.103	318.053	380.859	197.891	298.585	618.223	1642.04		1061.67	633.109	535.027	501.189		726.029
MTMR6	731.973					750.691	643.208	707.704	872.163		735.442			1063.72	391.276			595.662						533.287	485.943		773.731		891.518				632.304	503.138	1280.49	476.181
MTOR	704.651	450.515	651.08	382.855		513.408	667.685	961.267	723.303		1223.96	697.216	897.672	752.051	869.767		595.944	559.983	620.311	1176.34	738.712	390.076	708.202	518.74	1263.95	503.591	650.902	663.645	929.669		864.121	501.586	660.129	630.719	705.639	662.449
MTPAP	738.658	560.809				846.53	871.946		916.692		830.034		682.295	494.972	342.934		1190.53	443.391	366.421	302.827	382.409		777.617	391.03		757.049		770.149	526.806		627.146	241.834	847.071	931.712	532.451	901.505
MTREX	2580.75	3006.51	2806.11	3140.53	3144.76	3056.38	3195.63	3116.22	2660.35	3385.17	3071.66	3267.56	3345.8	2628.89	3023.67	2375.64	3033.33	2844.93	3098.08	2132.25	3007.49	3073.17	2971.62	2807.43	2879.55	3254.4	2508.87	3056.87	2882.53	2666.8	2647.26	2670.48	2805.85	3011.6	2930.2	2580.81
MUC1	2335.85	2377.08	1187.69	2109.94	2558.66	1825.17	2179.57	2813.59	2050.43	2208.26	1831.49	1646.34	1992.92	1596.14	2137.4	3154.13	2624.54	1812.95	2189.46	2875.08	1345.02	2187.02	2374.92	2144.04	2118.21	2300.27	2812.13	1864.48	2226.83	1254.95	2624.87	2150.14	2240.34	1368.46	3239.21	2210.06
MVD	8989.06	9070.84	12373.5	10100.6	10204.9	10020.2	7766.79	9205.96	7410.35	7301.38	11457.9	12492.9	9353.32	9575.84	10095.7	9270.58	8446.65	8229.79	7266.15	11744.2	8382.58	8091.14	8150.15	8788.79	9632.64	9840.97	10085.6	7253.08	11159.5	14074.3	8303.99	8702.49	8088.07	9660.42	9317.94	8119.94
MVK	1489.43	1237.78	1856.72	1073.56	696.207	1333.75	2003.64	1614.75	2009.04	1684.06	823.444			1300.1	2096.23	1246.75	1598.29	1396.54	1162.97		1596.29	1099.24	810.991	1059.5	1029.27	1454.65	779.32	1390.93	1744.77	959.125	1578.19	1380.03	1053.08	1462.65	1177.87	1370.31
MYBBP1A	1927.99	1646.85	2758.98	1376.94	2017.32	2029.74	1485.9	1581.03	1672.71		1646.42	1492.17	1954.9	1751.9	1114.56	2013.19	1611.87	2159.9	2492.17	2246.34	1857	1547.1	1349.11	1434.56	2206.26	1318.79	1780.59	1266.05	1646.21		1861.03	1728.63	1447.84	1729.31	2571.08	1607.56
MYDGF	18330.3	24006.5	7451.3	23577.7	8848.22	18331.5	18701.9	20081	19415.8	18816.2	21626.4	8381.12	22758.4	22804.8	20370.8	12382.8	21540.7	26986.7	23204	16885.8	21407.5	21912	17867.9	16011.5	18640.4	17865	26109.2	31553.3	23022.3	7812.44	18375	20282.9	22999.9	19603.1	21288	24626.1
MYEF2	1954.03	2055.44	2449.03	2196.5	1987.43	653.967	1595.96	1629.8	2176.29		1856.55	2288.68	2642.84	2131.85	2567.97	2000.31	2942.91	2047.96	2055.66	2962.26	2174.18	2618.18	2786.36	3131.43	2139.69	1428.68	2063.03	1642.12	2058.75	2333.04	2232.58	3400.39	2551.22	1616.63	2529.76	3165.07
MYG1	6218.26	6851.55	5975.14	7688.2	6485.3	5972.08	6425.62	6157.48	6014.53	4018.66	6488.99	7021.63	8328.97	7977.77	7295.54	6048.69	5619.49	7453.12	5914.25	6510.06	8448.18	7490.03	8671.74	8432.85	8220.23	6081.41	7380.88	6958.36	7201.49	5008.87	7088.83	6886.04	7698.59	6985.68	7505.92	7464
MYH10	3146.11	3157.02	3573.8	3589.99	3293.08	3430.89	2840.88	3240.89	3010.1	3417.87	2532.25	2915.37	2769.68	2923.05	3106.02	3238.36	2672.53	3295.66	3247.03	3869.22	3224.57	2752.58	3518.76	3616.93	3253.33	3079.92	3179.47	3696.4	3032.02	2265.75	2877.55	2982.62	2987.12	2730.46	3803.08	2556.34
MYH14	2347.65	3018.11	2460.17	3239.49	3333.16	2741.18	2680.77	2550.3	2865.98	3177.34	2390.07	2858.21	3004.04	3187.68	2238.53	3156.71	2670.98	2702.46	3278.93	3781.08	3281.45	2942.09	3616.35	2868.38	3429.25	2737.16	3047.15	3562.23	3128.61	2715.84	2960.86	2972.61	2862.67	2948.92	3007.02	2755.75
MYH9	10798	11471	10231.4	11795	10858.1	11303.8	9995.05	11085.6	11477.6	12457.6	9931.84	10416.8	9466.88	10041.9	8883.67	9947.81	9319.61	9343.45	10785.2	10588.5	10496.8	9732.86	10859.1	10993.6	9907.13	10150.4	10898.5	11212.3	10885.4	11010.5	11501.2	11684.4	11765	11469.9	10783.5	10388.1
MYL11																													2858
MYL6	339.028	1461.2	1298.9	1219.96	483.592	1167.88	408.871	1326.58	1538.28	1933.25		997.798	1161.19	821.067			696.849		1626.21	1087.06	835.799	726.329		1070.89	644.918	912.274	858.268		687.566			1040.05		542.285	914.438	885.285
MYO1B	2897.64	2806.59	2303.84	2181.46	1953.25	2221	2452.58	2613	2550.7	2732.26	3057.74	2565.6	2030.09	2900.36	2707.35	1635.98	2501.16	2256.74	2395.69	2625.14	2760.82	2076.06	2697.36	2238.42	2075.58	2730.19	2853.28	2379.12	3220.22	2728.46	2436.38	2258.25	2352.93	2945.38	2296.46	2674.41
MYO1C	22791.5	24670.2	16823.8	22072.9	17366.4	19886.3	23590.6	21857.7	23518.1	21007.6	22325.8	14685.4	20129.4	21357.3	21712.4	16297.5	19712.7	21842.1	23074	16855.3	22280.2	22035.3	19923.7	18389.2	17923.8	22843.2	19172.1	20914.4	23168.1	17982.1	22585.6	20628.7	22927.1	24237.5	20419.9	21544.6
MYO1D	2188.52	2364.55	2950.53	2327.07	2740.25	2569.94	2330.32	1979.53	2919.75	2327.38	1722.44		2565.69	2129.89	1943.23	2604.74	2355.72	1609.15	2485.03	1552.89	3067.13	2086.33	2520.18	1410.34	1662.66	1848.06	1938.82	1941.48	2861.49	3937.86	2057.62	2317.07	2276.24	2625.19	2054.66	2422.45
MYO5A	598.068			828.146				1174.72					508.195	1040.79			904.052	831.64	1234.16	844.667					1401.03	719.156	811.039	885.101						908.478	1037.12
MYO5C	1138.99	1239.27	717.026	654.582	1198.71	1012.94	1135.31	1258.41	770.347	889.074	1589.86	650.768	864.722	1420.26	1204.52	1131.99	861.773	1021.89	1372.3	1381.97	1049.14	1367.87	1175.3	1535.64	743.663	1268.4	1044.55	1618.36	797.244		750.988	1037.94	813.444	1402.53	1128.59	810.539
MYO6	1874.27	1800.01	1064.41	1390.7	1056.84	1913.95	1475.71	1688	1504.09	1097.96	1134.11	1246.41	1211.21	1597.71	1382.31	865.912	1149.57	1742.13	1736.53	1111.64	1619.28	1167.34	1850.67	1035.22	1161.72	1280.53	1184.16	1289.1	2077.69	662.202	1396.69	1669.27	1855.76	1484.57	1509.09	1475.59
MYOF	8867.98	8812.14	8614.21	8713.66	8760.67	8087.89	8497.49	8104.82	8099.98	8003.73	8319.19	7994.7	7305.31	8151.83	7513.84	8335.54	7996.23	7975.43	8419.08	7962.97	8019.64	8495.41	8289.93	8477.46	8000.11	9075.45	7531.36	8447.36	8248	7761.25	8628.66	8178.66	8134.78	8412.78	8264.33	8151.47
NAA10	2339.79	2176.86	1080.17	2711.7	2427.05	2107.44	2070.38	1915.34	2554	2512.15	1813.88	2812.85	2643.71	2158.09	2033.44	3891.19	3037.23	2983.54	1641.88	2338.42	2621.59	3230.5	2644.4	3913.41	2280.1	2499.7	2782.36	2503.8	2603.65	3718.77	2306.94	2623.3	2453.9	2311.97	2663.11	2335.75
NAA15	7305.7	7707.82	9251.85	5656.02	7527.83	8087.69	8247.74	7903.36	8613.53	6687	9489.36	7113.03	7890.48	6232.74	8798.76	6769.79	8415.55	7030.89	7826.82	8243.14	7001.15	7768.64	6982.37	5803.53	5767.47	7342.52	7469.02	6836.57	7730.16	9362.15	8974.72	9105.82	6941.74	8349.12	5914.11	7376.6
NAA25	3176.52	3361.84	3031.03	2250.38	3242.98	3353.92	3056.53	3481.02	3171.5		3522.44	3761.27	2947.77	2559.92	3819.38	3230.63	3478.4	3269.56	2613.93	3013.6	2961	2305.11	3155.82	2764.48	3280.48	3317.84	3644.95	3091.71	2708.07	1562.25	3133.78	3053.92	2743.78	2935.74	3251.06	3059.07
NAA30	1616.35	1878.88	1405.65	2953.24		1994	1544.52	1775.74	1654.94	1263.31	1750.87	1625.34	1826.14	1665.05	1093.06	1806.52	1998.17	2159.71	1747.61	1204.81	1848.34	2088.64	1578.16	2066.95	1636.54	1413.56	1263.43	2126.96	1172.25		1498.79	943.841	2103.82	2312.86	1849.52	1770.81
NAA50	2404.54	1933.16	1981.97	2377.91	2334.77	1206.38	2461.58	2238.49	2558.51	1933.65	2314.16	2775.32	2460.28	2624.1	2083.73	2676.04	1858.69	2492.63	2471.09	2167.67	2491.84	2560.38	2364.22	2449.07	1846.2	1747.7	2379.32	2240.31	2936.28	3176.56	2201.89	2001.74	2273.14	2262.54	2473.35	2808.58
NAAA	224.236	1271.69		908.28				824.549	1013.76		641.166		772.153	1195.86	1331.07		1290.89	1134.94	961.935	1369.37	163.037				537.057		1485.78					1281.85		656.123	1488.38
NAB2	1257.67	1145.59	1973.65	1578.89	1601.07	1389.09	1742.79	1120.92	1635.31		1003.67	2136.51	1434.06	1114.06	1076.1	1542.83	1294.26	939.066	1160.8	1185.22	1180.96	1107.1	1522.66	1242.18	1021.36	1444.63		1058.61	2333.49		1479.76	1398.86	1139.44	1255.53	2189.59	1609.24
NABP2			371.593				563.623																185.353
NACA	11622.3	9973.15	8191.85	7895.25	8836.93	9640.57	10134.2	11026	12101.4	10650.4	10980.1	7498.71	8101.93	9737.16	10144.3	6767.22	9564.08	9620.08	9723.56	7633.39	10715.4	9565.84	8178.58	7586.41	9313.63	9193.97	8950.75	9089.5	10841.4	5835.05	10238.7	9148.77	9166.54	12810.6	8755.25	9841.52
NACC1	2668.49	2737.29	2688.06	2563.99	1628.6	3019.46	2887.97	2935.34	3167.32	2932.64	2187.03	1818.06	2447.21	2407.18	2363.13	2172.53	2748.48	2225.77	2700.69	2884.91	1993.28	2442.65	2726.5	2849.19	2785.33	2473.09	2238.67	2543.06	1707.87	1656.54	3082.75	2320.76	2587.82	2211.95	2686.6	1759.67
NADK2	3135.81	3027.78	2723.68	3993.6	3460.58	3047.97	2990.91	2936.69	2728.1	3715.13	3362.26	3622.44	3090.41	3388	3019.06	3367.39	2870.07	3022.62	2654.85	2968.37	2501.15	3545.95	2985.4	3253.42	2891.18	3092.92	2504.25	2829.12	2592	3816.16	2940.8	2346.86	3044.31	3473.83	2662.85	3403.74
NADSYN1	1425.26	1480.92	1582.02	1438.65	1387.89	1402.24	1347.22	1218.59	1389.83	1789.86	1262.09	958.118	1475.94	1474.11	1307.12	1281.69	1588.98	1761.12	1765.94	1595.82	1645.39	1308.83	1422.24	1545.04	1410.75	1616.81	1200.24	1698.35	1583.88	946.462	1087.73	1069.89	1100.98	1610.2	1634.76	1693.59
NAE1	3349.29	4041.98	3782.43	4196.53	2966.43	3102.01	2624.22	3257.34	3000.75	3981.68	3329.93	2978.3	4053.37	3774.27	4255.72	3433.67	2903.02	3601.13	3050.35	3606.48	3161.17	2562.01	3467.55	2842.11	3499.12	3820.08	3591.07	3638.97	3349.05	2388.86	2965.39	3224.97	3256.57	2720.12	3917.86	3358.18
NAGK	1819.84	1865.27	2337.42	1128.56	2645.54	1639.66	2142.46	1728.24	2022.2		1699.98	1929.86	2067.1	2064.73	1332.43	1797.22	1748.35	2131.92	1784.27	1213.6	2207.55	2633.9	1994.1	2667.18	2119.06	1095.78	1779.7	2706.4	1524.14		1824.11	2522.13	2846.17	1980.78	2122.03	2053.54
NAMPT	10287.7	11320.8	12316	12550.4	12275.3	11424.7	11625.8	11122.5	10762	11626.5	10449.8	11755.6	8832.38	9021.23	10795.7	11379.8	9563.03	9571.07	10624.4	11690.4	10217.9	10083	9999.1	12316.2	11157.6	12166.7	9500.98	11930.7	11487	12968.7	10483	9717.78	10479.5	10165.2	10589.2	10313.8
NANS	8289.7	8870.58	6635.6	8745.08	7602.7	8170.23	7627.16	8837.71	7150.25	5801.96	7122.98	8303.89	9314.28	6737.52	7306.57	7972.83	8452.03	7179.86	7830.52	7340.81	9038.83	8442.37	8564.79	8351.35	9235.1	9538	8850.24	9352.13	6579.28	5010.57	6953.21	9389.26	8280.89	8140.53	7470.8	7701.36
NAP1L1	989.746	686.572	994.596	352.211	1700.13	465.808	1033.8	382.278	704.821	591.677	1044.51	872.996	1193.44	1207.9	1010.35	881.866	766.85	1382.74	1141.88	1001.61	887.147	567.135	842.761	798.99	913.015	420.859	815.306	219.804	681.615		1057.48	515.411	704.034	987.496	945.397	1182.33
NARS1	16012.5	17429	10828.9	17400.1	11822.9	11220.7	17212.6	13115.7	14762.5	9902.13	16156.2	13903.4	16814.9	18748.4	14766.7	16033.9	15341.2	16272.6	18570.7	17453.1	18997.2	19708.1	22567.5	15502.4	17463	14763	18720	19823.1	14433.1	18593.2	15172.1	15601.2	13546.1	16175	15338.2	16955.3
NARS2	1882.95	1403.39	3299.04		689.963		765.545	1707.65	1083.74		583.255		1366.76	1398.86		663.859	1548.63	1412.87	1616.94		1440.7	1603.28	1621.93	2667.3	1233.83	1149.52	1269.16	1260.73			1198.2	1295.67	1242.88	746.008	2386.45	1501.13
NAT10	5531.31	5297.3	6047.24	5268.65	5671.75	6242.34	5273.57	5024.09	4562.31	4202.65	4797.25	6955.7	5286.05	4486.31	5257.21	5591.95	5390.04	5253.46	4167.82	6515.71	4335.18	4471.93	4558.29	6520.01	4494.25	3756.55	5536.88	3404.56	5788.97	6009.85	3850.96	5196.7	4543.31	5705.01	5909.87	5169.8
NAXE	2403.38	2148.5	1967.94	1819.73	2154.99	2321.31	2024.41	2113.49	2586.24	1810.59	2589.21	1557.01	2603.12	2399.16	2018.15	3355.72	1964.38	2066.98	2447.77	2289.2	2129.72	1914	2066.75	2648.29	2453.74	2662.33	2161.89	2679.79	2398.59	2759.61	2017.16	2396.13	2322.55	2127.48	1927.3	2571.82
NBAS		610.522				206.294		388.836		522.579			390.05					342.926	267.078				539.451				531.116				432.674		456.731	264.632		466.199
NBN	2411.1	2370.52	3011.92	3354	5736.91	3213.81	2258.44	3651.3	2212.85	4099.7	3061.5	2598.26	3103.67	3320.71	2308.86	3603.28	2571.9	2023.85	2590.74	4167.51	2383.4	2828.6	2033.49	3656.62	2539.03	2467.17	2507.86	2139.2	3126.92	4517.35	2303.25	2620.12	2454.08	2787.93	2848.81	2803.62
NCAM2	2057.9	1808.55	1781.26	2352.48	1281.6	2130.99	2472.65	2360.32	2332.23	1758.96	2011.4	2511.31	2573.55	2462.91	2302.95	2091.03	2416.71	2123.15	2140.93	2156.35	2212.73	1776.62	2886.8	1756.7	2103.57	2185.29	2709.76	1653.92	1699.72	1940.8	2095.16	2261.74	2065.54	2102.53	2053.69	1978.59
NCAPD2	1170.34	1069.42	1608.19		1523.13	1068.77	1284.84	946.212	1030.75		1149.6	1501.21	1650.99	926.069	1349.7	796.063	1179.69	941.598	1231.88		1222.45	947.409	1031.2	1273.5	1006.74	967.337	753.211	773.108	838.781	1227.02	965.736	1318.14	1056.11	1037.11	477.498	1218.78
NCAPG	4300.21	3163.08	3756.76	3062.16	4365.38	3589.18	3954.83	3395.81	2793.99	1462.77	4119.99	3117.15	3852.24	3815.41	2868.7	3600.91	3690.82	4424.03	3861.32	3247.15	4236.22	3435.28	3745.92	3998.58	4526.68	4285.27	3714.02	2825.65	3908.97	3101.63	4513.63	4194.77	3507.66	3861.4	3455.78	2917.1
NCAPH	2121.43	2156.86	2062.44	2613.69	2758.56	1939.88	2047.87	2002.71	1490.84	2194.4	1792.45	2642	1684.79	2053.56	2066.49	2662.37	2023.17	2214.18	1734.25	2660.13	2271.22	2098.01	3028.51	3289.08	2357.25	2115.36	1836.13	2769.29	1728.12	2902.27	1915.43	1840.51	1751.39	1909.24	1960.98	1765.49
NCBP1	2468.93	3124.87	1382.13	1321.47	1395.8	2997.5	2314.7	2554.49	3394.94	1803.49	3040.62	1250.82	2437.19	1417.09	2914.14	922.895	3597.92	2577.14	3351.11	1780.3	2157.96	2584.4	1418.72	1911.61	2740.82	3245.43	2311.22	2661.92	2695.22		2897.8	2847.99	2384.78	2757.9	2541.64	2298.25
NCBP2	5984.17	5243.19	7180.7	5381.5	6464.97	3434.96	7139.55	6352.37	5895.26	5956.25	6267.24	5098.79	6439.23	6195.82	7470.9	5255.81	5743.05	5500.29	5057.82	5096.62	6372.01	6264.04	5808.39	6245.18	6471.41	5731.41	7291.2	2808.09	6296.79	4256.69	5872.07	5655.23	5291.08	6488.35	6491.69	6071.91
NCEH1	1495.58	1329.6	2056.83	1773.35	2163.06		1525.64	916.459	1533.24	1015.44	1645.14	2242.09	2030.17	1208.35	1462.89	2827.94	904.808	1232.3	1693.12	1047.65	1758.77	1335.49	2161.27	2524.58	1697.52	2037.64	1151.83	820.703	1464.93	3009.48	1420.43	1437.5	2493.02		1919.68	1905.03
NCKAP1	2896.34	2566.19	2040.3	2532.78	1738.58	3887.19	3295.14	3370.76	3158.79	3037.29	3174.04	1645.18	3580.03	3475	2307.29	1500.29	2645.81	3245.37	3203.9	2335.28	3740.53	3488.73	2239.36	1796.3	2702.02	3286.4	2379.39	3386.66	2839.47		3654.9	3409.99	3049.52	4038.25	3167.55	3473.48
NCL	19937.1	16479.8	20587.1	17222.3	23886.9	13921.2	27197.9	16412.3	15452.4	5347.15	24263.1	16201.8	21497.1	16703.4	20092.8	17048.3	18273.5	14828.8	18189.6	19910.1	23830	32326.3	20761.8	25496.7	22167.1	16487.5	21756.9	7523.13	23653	9240.44	21985.2	21154.6	19001.9	21043.3	18928.9	20959.1
NCLN	5179.7	5149.04	5343.08	5250.21	5060.08	5807.17	5386.92	5010.56	4901.69	5606.24	6190.44	3992	5382.13	4856.1	5570.31	5175.39	5696.02	5388.02	5795.18	5079.21	5538.07	4738.77	5772.08	4698.51	5407.13	4453.36	4633.78	5120.13	6372.85	4473.65	4734.83	5055.2	5005.79	5668.4	4306.85	4347.78
NDRG1	839.664	702.295	535.805	440.392	685.064	288.186	621.158	833.84	767.747	426.667	783.343		389.578	807.671	950.935	672.48	546.574	848.799	556.068	498.698	751.284	663.222	529.676	853.279	1320.62	422.163	375.463	966.663	752.832	289.255	917.91	657.719		662.904		683.247
NDRG3		1291.54	4429.89	1377.41	5494.52	2181.87	1824.86	2087.46		2358.54		5260.54	1513.28	2073.16	2033.93	4392.3	2062.77	1755.6	2098.63	3811.15	2222.91	1500.12	2730.3	2794.65	3196.91	1716.23		2010				973.755	1267.05	1721.91	1677.26	1815.1
NDUFA10	2494.34	2232.36	2267.85	2935.63	2772.11	3468.93	2718.73	3278.2	2683.28	2269.7	1985.39	2082.64	2528.14	2831.89	2761.3	2423.15	2250.1	2795.49	3259.72	3392	3056.23	2431.64	2505.98	3719.44	3275.04	2666.52	3848.69	4013.77	2940.97	2924.84	2611.68	3325.5	2732.66	2970.63	3167.83	2826.29
NDUFA12	2034.69	1006.15	3313.81	898.423	3077.41		1525.24	1928.79	1100.88		1761.36	1949.62	1043.45	1634.24	1525.23		877.578	1460.64	2184.89	1990.96	1429.95	1458.32	2132.99	1922.47	1696.51	1634.93	2071.75	1318.3	882.986		1873.71	1821.36	1469.32	1422.94		1502.75
NDUFA13	1459.22	1862.74	2746.43	1449.85	1647.33	2060.49	1817.21	2619	1867.44	2578.7	2045.74	2827	2576.2	2114.92	2280.35	1491.67	1881.04	2204.07	2126.12	1874.76	2429.56	2164.97	1630.35	1913.94	2018.34	2354.88		1535.42	1594.91		1922.03	2579.95	2330.24	2196.06	2761.29	2354.73
NDUFA4	8232.85	7379.08	2920.11	6495.52	3987.46	6089.86	7275.74	5852.22	6803.48	3230.45	7703.33	4316.36	7933.1	8972.58	5823.95	4287.85	7515.57	6466.77	9797.17	3546.73	11697	9181.13	9394.62	6204.35	8213.95	8540.68	7026.28	6709.69	6706.24	2885.55	9300.26	5593.43	9420.5	8247.96	3624.86	8866.51
NDUFA9	2454.78	2445.27	2525.93	1532.51	1502.47	2696.92	2487.38	1813.77	2259.73	1594.33	1854.9	1668.17	2042.47	2009.4	1948.1	1236.52	1953.45	1987.27	1714.14	643.981	1869.82	2087.15	2100.26	1490.76	2019.71	1703.46	1928.7	1916.74	1929.94		1556.22	2080.07	1998.93	1773.33	1488.07	1265.7
NDUFAF3	2932.16	3520.53	3214.95	2893.52	2757.76	3273.61	3253.77	2777.26	2682.85	4467.8	2982.92	3192.19	2945.69	2645.02	3167.25	3266.93	2169.98	3176.16	3731.99	3231.13	3132.94	2839.18	2768.93	3230.91	2465.89	3313.03	3399.04	2982.26	3273.91	3027.04	2573.19	2490.27	1539.86	2938.84	3506.38	2952.34
NDUFAF7	762.096	347.522		947.669		483.574	434.114	548.348	762.789				597.875		527.777		777.536	510.837	624.304		496.188	582.381		364.722		1127.75			644.145		636.445	727.949	335.441	520.186	510.047
NDUFB10	2076.47	2331.89	2085.18	952.68	2212.6	1921.8	1202.68	418.849	1330.8	2090.78	1845.99	1481.46	1329.42	1418.91	1577.89	1332.67	1649.81	1461.74	1741.31	1420.13	1890.52	1238.79	1508.76	1784.4	1525.4	1556.99	1614.02	1336.12	1723.31		1982.67	1554.05	2083.82	1646.4	1436.56	1418.01
NDUFB4	1410.52	1602.86	1233.1	1567.12		1064.3	952.132	1607.4	1675.89	1540.66	1462.96	630.062	1249.55	1456.27	1602.59	1572.04	1695.48	1196.96	1370.36	1063.06	933.649	1050.29	1134.96	1129.11	1451.42	1000.49	996.942	1281.62	1442.94		1688.41	787.142	1407.9	1440.41	1381.89	1295.59
NDUFS1	6796.01	7160.14	7636.17	6460.91	6455.21	6342.62	7074.34	6751.62	5969.88	5672.02	6625.59	6316.44	6426.71	6360.33	7143.66	6502.27	6539.88	6442.08	6159.24	5465.93	6882.07	6664.61	7513.3	6738.47	5962.37	6872.64	5785.28	6238.55	6336.21	5480.6	6272.55	6792.82	5761.84	6242.81	6110.41	5987.7
NDUFS2	7915.21	9947.67	7324.56	8565.01	6773.3	7968.69	7977.62	9690.89	8683.57	14334	7618.36	2702.55	7393.24	5393.08	6783.52	6732.97	8820.45	7914.6	8330.54	7385.45	8496.58	9630.24	7109.34	6757.58	5889.58	9609.32	8115.05	11968.5	7045.9	4850.36	12404.6	11656.6	13609.8	8402.46	6501.39	9263.64
NDUFS3	4003.56	3439.46	3710.18	2646.51	3260.32	3663.19	4435.73	4746.55	4901.25	3930.68	4946.01	3024.97	4717.8	3446.65	5051.75	3104.06	3836.45	2587.18	3257.86	2368.35	3410.1	3778.13	2781.86	3309.13	3855.21	4948.74	3705.54	5136.01	4716.78	3354.03	4223.9	4348.63	3538.03	4539.31	2753.28	4383.26
NDUFS7	4027.44	4257.1	3811.53	4029.89	3000.51	3434.8	3874.73	3241.68	4288.95	3200.15	3582.5	3051.09	4571.55	4645.31	4792.5	3447.02	4620.69	3826.02	4036.15	2994.5	4462.22	4242.4	4330.41	4069.5	4266.01	3425.37	4310.45	3481.76	2753.02	3311.42	2468.41	3721.5	3226.53	3356.27	4881.83	3490.84
NDUFS8	623.245	1026.17	428.254	537.937	361.406	665.2	1162.87	907.858			806.775	798.476	1386.89	921.953	560.179	863.025	858.135	1127.49	898.517	728.029	933.38	1423.78	1296.38	923.466	750.387	939.607	665.148	920.852	890.616	980.777	891.619	543.785	486.328	927.671	1100.21	1086.66
NDUFV1	4126.33	5000.4	3841.87	5522.71	4435.46	4645.82	4932.21	5211.14	5173.84	3916.9	4339.97	3289.57	4726.73	4303.54	3629.91	2701.97	5246.31	3847.78	4577.19	3145.31	4700.42	5253.55	4896.11	3825	4909.06	3912.22	4107.76	5581.53	4133.32	2994.76	5417.89	5346.13	4501.13	4311.43	5207.83	4010.16
NDUFV2	2512.86	1663.69	1474.12		1622.36	1678.1	2168.87	1645.58	1559.78		2230.01		2205.52	1580.47	1629.65	1419.05	1820.01	2242.96	2100.37	1879.56	2104.46	1322.82	1626.95	972.014	1764	2210.55	2027.01	986.236	2242.3		1304.99	2153.75	1733.31	2493.71	804.345	2350.72
NECAP1	2293.31		4086.29		3411.09		1692.09		888.05		865.915	1626.5		1097.78	988.334	1701.21		519.221	1598.18	656.32	1931.82	1508.56	2516.97	2597.59	1138.17		1064.65	1175.78	2013.67			566.245	1091.31			1416.35
NEDD1	436.735	432.607	464.199	282.654	225.109	338.355	346.049	177.435	413.634	99.8736	756.132	573.126	427.215	282.731	371.232	923.67	306.001	459.058	257.004	243.208	440.831	366.402	654.446	268.997	803.347	345.178	502.192	505.659		477.767	236.55	410.581	130.147	284.768	335.619	460.754
NEDD4L	356.209	287.804	349.42	191.389	508.338	212.911			267.345		264.26		769.49	702.182			280.347	397.812	425.441	728.947	457.87	530.608	355.873	437.022	524.933		659.267		534.179		588.247	510.165		172.247		435.548
NELFB	495.236	443.721	212.982	309.621	451.534	366.551	583.123	947.987	532.79		739.97	280.283			643.108		666.14	313.084	751.132	549.731	552.716	531.359	707.277	505.426	640.93	712.66	736.673	955.694	582.026		750.42	819.109	841.547	459.714		814.191
NELFCD		207.661					474.382	163.336	313.43		523.649						753.629	877.157	496.378		837.294	376.227		584.504	368.608						156.353	364.055				213.682
NEMF	2735.14	2472.43	3052.49	2531.64	3659.7	2579.7	2515.16	2936.38	2255.04	2242.3	3438.97	4059.89	2944.37	2658.87	3040.62	3754.67	3110.24	2721.07	3232.05	3165.93	2807.43	2620.55	3399.6	2274.8	2718.34	2239.66	2724.69	2273.49	3765.5	3979.56	2828.43	2709.69	2379.72	3001.4	2381.08	2163.09
NFS1	2393.94	2753.44	1548.14	3205.16	1752.32	2208.29	1460.12	2468.63	2959.98	3204.23	3152.62	3893.63	2806.39	3185.31	2632.41	2976.57	3012.36	1989.04	2737.96	2306.31	2547.49	2448.67	2599.97	2264.01	2392.78	3182.31	3771.77	2749.53	2546.4	2400.65	1924.36	1686.71	2247.24	2857.73	2474.42	2134.05
NFYC	1031.06			1635.05	3225.53	1041.76	1044.11	1570.66	1346.55		1511.92		1322.4	2210.53	1628	1678.51	2078.4	1744.06	1417.46	2640.56	1113.79	1174.95	1543.65	1223.83	1866.6	2202.72		2174.59			1475.49	1378.85	1854.39	1249.06
NHLRC2	1873.11	2882.41	1944.87	3454.47	1862.26	3803.35	2592.26	3535.26	2216.44	5007.5	2350.48	2721.62	2386.44	3526	2512.59	2916.71	2519.9	2678.41	2947.52	3133.75	3027.82	2955.26	3009.18	2089	2922.32	2491.11	3409.34	3119.99	2022.32	850.884	2619.45	3309.06	2845.58	2641.98	3498.25	2927.49
NIBAN2	1285.34	1315.17	1581.98	929.955	2303.98	1735.07	1742.93	1711.83	2655.83	1381.37	1804.33	619.885	1170.06	740.577	1488	1738.37	2384.98	2052.22	3159.9	1646.66	1318.3	1400.95	1662.57	1530.92	1235.23	1093.67	1074.92	1302.34	1572.77	723.798	1293.51	1288.38	1304.5	1213.45	1376.79	1359.23
NIF3L1	3471.47	5141.95	4667.37	4124.31	3131.21	3863.3	4376.7	3839.96	3278.62	5244.33	4375.16	4160.84	5512.75	3423.38	4693.76	5008.48	3038.12	4020.85	5006.75	5161.21	4455.2	4282.01	4590.52	4718.2	5106.1	4237.59	3282.27	7349.29	4604.79	3424.45	2874.89	3576.19	4553.21	3482.89	4920.72	4196.92
NIFK	308.483	351.789		173.651	236.965		328.28		224.175					236.726			221.017		614.551	336.333	419.895	307.37			559.217		524.765	193.581				370.604	383.361	312.588	350.28	256.958
NIPSNAP1	8691.22	11956.6	9394.15	9858.62	10919.4	9873.43	9709.65	9305.8	9836.35	17298.7	8588.78	12864.1	9001.59	10552.3	10765.8	10207.9	10790.5	9553.35	10338.1	10504.5	10098.5	9972.85	10609.5	11338.3	10522.4	9656.82	8366.79	10552.6	9570.27	11665.2	11362.1	8344.24	10481.1	9310.33	9431.3	8949.94
NIPSNAP3A	2586.9	3685.33	829.832	2967.64	1089.78	2400.54	1984.43	2670.89	1755.5	3022.76	2002.52	1641.06	2345.34	2719.51	2584.52	837.576	2058.9	2609.88	2592.5	1026.68	2548.28	2022.2	2066.12	1164.53	1798.63	1865.82	2385.74	2838.61	1397.82		2223.92	1778.93	2149.46	2056.32	2250.46	1928.06
NIT2	5258.64	4477.65	5283.87	5251.65	4017.06	4100.32	4753.98	4883.18	4507.88	4208.93	4955.04	4395.96	5645.54	5782.71	5250.38	4128.35	4507.82	4816.18	4744.71	4673.62	4795.23	4323.8	4607.75	5012.57	5343.58	4901.69	4743.32	4656.15	5296.26	3537.36	4999.87	4616.16	4413.32	5427.99	4322.34	4638.64
NKIRAS2	353.96	409.662			368.863		339.17	422.46	304.204		511.496		806.016	268.548			754.286		827.38		631.233	456.255	649.156	573.111	814.072		530.186	858.787	184.312		268.15	380.504		310.153		239.548
NKRF	1870.36	1609.03	1800.88	1757.96	1652.85	2625.47	1350.61	2454.88	1082.89	2318.36	2230.68		1968.26	1969.56	2079.58	1409.12	1637.56	1591.22	1687.24	1373.35	2221.87	1748.28	1633.1	1887.51	1652.93	2093.14	1750.4	1727.95	1857.57	1246.61	1369.86	2073.19	1626.66	1893.98	1764.08	1592.6
NLE1	738.829	639.466		661.08		929.105	670.019	683.407	440.74		829.292	495.584	399.576	757.233	980.151		885.875	674.782	789.916	358.329	688.635	784.715			628.89	566.689			562.765		645.465	574.219	537.857	655.252	377.542	604.083
NLN	10722	9079.48	8528.76	9455.53	7914.56	10906.6	9795.44	10572.9	9468.46	12107.8	10012.5	7398.22	9133.89	9920.83	8467.68	6262.37	11003.7	9555.6	10021.8	8136.44	10181.2	10610.1	8351.54	8892.88	9743.31	11002.1	9809.07	11421.2	9898.13	9628.13	11115.5	11254.8	9722.77	9901.38	10183.6	9850.47
NMD3	1995.24	2460.44	2395.26	2698.46	1201.12	1692.63	1753.19	2461.95	2257.69	2698.01	2877.78	3978.15	2787.31	3550.86	2591.76	4838.68	2786.78	2178.99	2098.26	2157	2579.18	2294.9	2981.46	1959.2	2163.75	3644.1	2464.46	2097.79	2660.25	3349.32	2214.16	2129.64	2368.27	2543.36	1873.96	2295.35
NME1	3591.6	4643.56	965.227	2712.22	1567.57	5654.41	3882.07	4409.45	5290.83	3799.34	2667.5		4205.26	2634.67	3429.42		5423.65	3653.07	4567.77	1123.87	2700.77	3825.04	2009.32	2729.09	2235.42	6289.34	3596.3	3781.6	3067.22	1802.91	7371.45	5859.25	6785.54	4253.87	5574.76	4859.21
NME2	731.828	914.978	668.596	817.131		276.565	1220.34	596.278	599.15				438.225	1002.71							655.456	731.189	566.033					348.867			1735.22	398.486		772.398		361.701
NME7							371.598				394.609															207.766
NMT1	2165.6	1306.19	2711.67	2044.21	2679.86	1655.43	1553.19	1418.79	1628.26		1656.88	1841.97	1621.6	1896.83	2211.96	2102.23	1773.05	2213.21	1908.65	2892.28	1643.29	1924.17	2236.48	1731.04	1760.06	1714.95	1418.67		1514.16	1857.01	1472.7	1381.23	1421.16	1733.92	1289.59	2122.86
NNT	3120.57	2467.05	2708.85	2934.33	2604.45	3059.6	2671.17	3016.11	2823.19	3375.43	3283.01	2408.35	2743.4	3146.26	2902.77	2505.14	2723.57	3030.38	2837.06	3018.49	2734.97	2725.79	2885.3	2584.18	3107.41	2780.74	2791.71	2544.41	2739.6	3340.51	3145.96	3155.38	3595.6	2915.25	2573.7	2963.09
NOA1	864.348	1256.57	2731.24		2182.84	756.239	1100.25	1106.42										702.681	2957.9		679.683		840.193			1750.19			369.996	925.445	613.773	1665.2	944.378	1014.79		946.34
NOB1	3926.14	4432.85	3289.65	6677.99	4270.69	4414.68	4041.5	5045.43	3516.4	3681.42	5458.68	6673.9	5238.92	6257.71	6026.72	6883.09	6167.95	5600.85	5146.63	7486.49	3538.22	4376.63	5501.63	5999.32	6174.03	5208.77	5496.7	4733.49	5270.85	5156.45	5033.78	5200.87	5013	5310.83	6589.56	5547.16
NOL6	785.13	548.654	3384.84	632.698	778.827	850.026	1075.51	556.123	674.127		630.119	1109.34	830.577	572.939	514.884		866.032	1439.49	1051.26		1226.41	652.997	771.568	636.153	1041.86	1994.68	654.565	710.238		1852.16	555.951	628.78	667.779	562.206	618.88
NOLC1			354.583																				253.709
NONO	4991.19	4605.87	4902.7	4371.67	5035.72	4121.95	5481.95	3649.78	5672.72	3281.01	5874.37	5175.08	4998.26	5363.06	4287.14	4835.95	4286.96	4642.63	5631.45	4371.07	6159.02	4877.34	5679.13	5009.9	5066.85	4327.84	5053.27	3478.54	4908.58	3709.65	4667.66	4409.17	4649.5	6198.02	4552.88	5937.3
NOP2	4607.38	3800.94	4463.02	4223.13	4598.58	3221.37	4784.95	4436.63	3274.08	2318.26	4263.56	4453.72	4824.29	4422.44	4765.75	4444.52	3904.81	4271.51	3030.6	4537.3	5048.72	2921.99	4914.97	3995.29	5121.59	2877.54	3719.46	2420.54	4196.89	2941.6	3475.37	3540.45	2447.45	4530.63	3916.01	3769.21
NOP56	543.91	344.824		722.557			439.86	512.974			507.022					663.836		146.789	249.66		352.612		409.552			374.385	168.64		595.657		685.754	282.997		415.781	588.667	275.971
NOP58	1525.67	1116.11	1444.3	1489.71	2756.25	1988.62	1470.09	1443.2	1199.07	1484.86	2357.65	2475.76	1393.21	1206.77	1273.64	2309.39	1907.3	1408.14	1573.5	1777.48	1054.53	1705.98	1580.95	1627.31	1221.68	1233.27	2101.55		1208.12		1241.83	1501.11	1125.55	1820.1	1403.68	1212.13
NOS1AP	1088.83	1262.1					886.704	543.941			873.38				1079.01		1570.42		1195.99		1384.57	879.586	857.62	1016.69			1376.08	1186.11			1186.49	660.924	1288.46	742.709		1591.81
NPC1	1672.24	856.404	882.268	1449.85	1405.84	1419.9	1225.63	1226.33	1042.64	1798.37	1155.84	1084.64	1407.4	407.537	1221.98		1789.66	1124.04	1227.33		1562.24	1394	1937.96	2039.03	928.464	961.643	1092.34	1488.46	1632.42	735.35	1640.34	652.318	976.693	802.496		1056.47
NPEPL1	1969.54	1934.57	1857.21	2784.95	1796.82	2542.32	2161.51	2416.15	2496.14	2544.25	2679.16	2043.58	2471.55	2154.05	2420.65	2619.46	2861.47	2139.78	1986.01	2913.64	1858.79	2014.64	1868.75	2148.84	2284.58	1895.47	2172.15	1932.5	2249.25	1629.99	1625.09	1995.8	2103.92	2318.94	1644.05	2242.48
NPEPPS	13639.6	14170.1	9882.86	13579	8287.75	13995.2	14293.9	14430.5	13443	10954.5	12574.5	9320.99	14450.8	13047.6	12728.5	8666.29	15924	13256.6	14306.7	10326.3	14832.5	14914.7	14178.1	12546.5	12585.6	13767.4	13630.6	13181.4	13114.1	7352.34	14392.6	14823	15817.9	13836.8	12703.4	13964.9
NPLOC4	5747.51	4973.27	4541.83	4477	5743.03	5868.41	5564.6	6085.65	4959.79	5858.7	5386.64	4082.06	4911.59	5161.19	5892.95	5312.87	4481.32	4269.7	4290.86	4566.79	4548.06	4862.21	4700.48	5059.14	4625.89	4934.08	4840.16	4907.15	4882.64	4073.12	4838.88	4913.68	4238.28	4624.46	4309.73	4886.33
NPM1	1011.79	1965.01	1491.23	2859.37	2138.92	1496.09	1471.62	1723.37	3360.94	533.71	1126.59	3404.65	1648.7	1636.46	1400.66	2840.22	1639.84	2101.31	1837.3	3496.41	1938.67	1282.99	2881.58	2925.34	2077.33	1627.2	1801.83	1673.96	1471.38	3398.79	3050.5	726.309	1501.66	1639.18	1176.22	2347.74
NPM3	918.728		2966.19	432.228	1600.96		642.93		787.611		525.589	1084.29	129.005						823.701		696.802	270.782	1299.15	1303.66	1207.62	1119.97	67.2821	191.225	555.552	747.259	701.233	296.848	860.5	596.677		825.866
NPNT	2868.34	1140.73	1174.64	349.134	1357.56	1154.54	1905.37	1017.32	931.005		1312.45	1837.12	1001.59	1209.02	1045.93	1233.15	1090.31	901.651	1265.15	637.709	1068.44	1357.92	1621.31	697.184	963.215	916.618	1151.15	1244.76	1068.96	1070.79	1350.08	767.973		1274.03	766.211	989.393
NQO1	28677	37956.1	20948.6	33574.6	18562.5	24650	30982.2	24607.9	18178.3	13387.9	24316.9	21560	31413.4	33795.5	19289.1	20057.5	27657.6	33182.5	36444	25928.6	41041.1	34771.7	41020.5	38719	29782.3	23093.8	39351.7	34006.8	19980.3	11174.9	26306.5	32343.1	30305.5	24241.3	30326.6	32058
NR2C2AP	1195.49	961.095		1062.32	716.783	838.238	917.842	733.831	856.129	1025.65	832.828	415.72	774.56	770.511	1019.39		1042.73	1233.71	1030.92	428.309	474.909	773.957	943.732	661.028	896.224	789.477	745.798	828.902	506.42		1315.51	1181.68	763.737	1047.54	412.359	781.109
NRAS	7891.71	8772.16	6622.41	12838.4	7175.81	8081.86	9572.18	9785.27	8718.91	8650.54	8376.71	12154	12368	11333.7	11814.1	16175.4	12287.4	13901.2	11355.7	14968.3	10136.9	9048.79	9111.56	11928.6	13516.7	12662.1	11277.5	12244.8	12548.8	5600.64	7274.32	7109.81	11279.8	8297.95	11653.4	9482.42
NRBP1	1013.42	643.294	2566.41	1078.87	1811.7	1245.48	1175.14	892.916	975.307	1352.85	492.896	848.368	622.253	1076.8	889.551	301.064	677.54	758.041	710.482	787.114	1088.59	998.743	1564.16	1781.78	852.105	1250.46	966.096	1084.12	621.69	1946.04	865.862	958.822	910.21	821.612	934.051	414.906
NRDC	2654.16	3164.87	2840.21	2683.5	2732.79	2964.48	2791.98	2939.76	2906.54	2335.37	2673.76	2711.94	2723.87	2638.26	2491.67	2297.62	2594.41	3171.61	3361.65	2382.88	2985.75	2916.3	2632.41	3162.76	2856.92	2780.11	3038.81	2989.76	2959.75	1952.77	3961.25	3452.72	3543.05	3042.52	3041.56	2915.94
NRF1	1054.23	722.548	885.787	695.537	891.392	903.331	1235.09	723.231	959.66	950.352	793.331	478.096	810.803		793.316	884.313	930.895	811.008	954.838	1141.02	830.359	681.477	784.309	993.301	865.128	821.215	790.144		1050.56		1060.83	676.495	1453.99	942.078	1018.5	958.422
NSDHL	8167.31	9244.69	5267.06	9849.06	8442.49	5531.86	7785.57	7250.03	7382.51	6822.39	7599.5	5384.59	7199.83	9070.15	7816.52	11632.9	6454.78	7139.21	10050.9	10072.3	10174.4	9826.1	8746.41	5556.39	11809.2	7945.28	7873.7	13132.2	5522.66	6018.65	6645.15	7637.7	9548.34	7547.34	7019.28	8031.6
NSF	10199.2	9821.68	9395.66	9132.12	8395.32	9403.27	9919	10031.6	10085.3	9857.65	9549.43	9576.21	10068.6	10091.9	10628.7	10530.7	10250.2	9585.78	9122.07	9601.77	10629.7	10015.9	10428.9	9447.17	10217.4	10664.3	9510.06	8950.07	9941.77	7831.14	9582.06	9466.55	10649.9	10159.8	9465.05	9828.14
NSUN2	8241.71	9202.77	5592.01	9807.99	6834.26	8334.21	8543.84	7823.77	7324.54	5937.01	7600.36	7620.32	8219.76	8834.87	9285.82	7258.42	8991.04	9687.52	8524.92	8578.47	9269.46	7881.45	8665.7	8908.49	9276.26	8580.81	9054.63	7131.34	8098.64	5805.54	8415.72	8747.54	7833.19	8374.39	8335.58	8601.25
NSUN5	1084.59	1293.91	1336.62	1193.39		1418.95	1522.12	1775.08	1177.66	496.797	2045.08	1366.76	1202.8	2262.58	1367.82	1279.75	1233.2	1255.07	1924.77		1774.76	1061.54	1307.85	795.846		811.219	1204.58	1663.25	1357.14		1183.14	1660.33	1079.63	2021.39	825.552	1088.72
NT5C2	1536.61	2525.6		1882.82	1915.19	2106.37	2034.22	2707.56	1652.04	3048.98	2208.94	1837.41	1500.03	2794.53	2387.62		1374.36	2278.05	2425.12	2249.08	2562.98	2028.11	2573.3	2278.08	1848.66	2384.6	2075.73	2142.32	1993.71	1692.62	1592.45	1979.47	2506.47	1909.78	2437.51	1756.84
NT5C3A						916.669	355.423	445.075	717.572	484.649	551.51			452.815			758.462		623.686	395.203	290.42		474.215					461.243				489.811	430.379	143.298
NT5DC1	1339.4	1386.21	1381.56	1439.96	1296.33	1172.04	1268.33	798.426	1233.38	645.329	1391.33	3170.52	1591.59	1439.7	1405.38	1297.96	935.023	1024.91	1425.18		1343.28	1750.77	1861.12	2098.05	1275.23	1941.34	1174.98	1662.25	1267.71		1562.44	1400.87	1340.83	1449.45	1458.59	1318.05
NT5DC2	1178.64	1285.27	1250.21	1002.35		1242.22	1456.94	1718.09	1373.62	1180.55	1835.66		1245.6	1276.7	1066.89		2177.47	1613.96	1684.38		1341.73	1477.33	1441.97	2020.1	1726.34	1113.96	1756.36	1712.5	877.806		1702.38	1507.36	1847.86	1121.45	1500.36	1393.4
NTMT1		181.229			316.826				294.592					389.153					142.188			58.8903											265.566	288.671
NTPCR	953.177	1242.91	1563.46	1442.08	926.042	1443.18	1456.27	1087.14	1349.91	2046.83	1354.63	940.958	1415.84	793.732	1636.72	1875.36	1573.27	1377.11	1981.69	1875.87	1191.83	994.742	1456.6	879.719	1524.85	1605.81	1273.62	1251.29	1490.44		1109.25	1118.29	1194.97	991.405	1259.37	1311.87
NUAK1						1372.63				1678.64	1147.54																								2034.62
NUBP2	756.502	293.61	1622.68	521.013	658.206		509.881		230.589		612.567	859.783				166.251	180.143		202.402		1060.25	458.821	1037.08	1399.49	733.058	641.973		659.771	765.257	1133.3	657.306		567.438	510.425		660.073
NUDC	5273.67	5252.02	5963.59	5616.75	5022.74	4760.82	5540.6	6099.7	5913.08	4769.19	4910.81	4836.81	4591.68	5480.96	5401.56	4706.45	5340	4712.36	4386.24	5551.41	5236.45	5134.69	5802.53	5645.16	5329.42	5045.92	4986.72	4507.9	5371.12	5677.16	5741.13	5951.24	5512.29	5239.14	5249.96	4055.71
NUDCD1	15034.1	13632.6	6992.08	10808.1	7073.5	14880.4	13847.5	14418	12606.2	15749.1	14614.4	5210.92	12555.3	12053.4	11438.7	8280.53	14596.4	14106.6	11696.4	6307.3	12455.4	14164.4	9824.33	7277.04	9415.51	14340.1	12448.3	15614.4	13396.4	4251.86	15662	13793.8	17169.7	13900.2	12088.9	14194
NUDCD2	3782.89	2488.94	4381.09	2271.46	5320.8	2233.8	4932.39	2887.52	4405.59		3632.71	5231.99	3234.18	3164.43	2782.5	4007.63	3866.18	2907.6	4198.25	3343.02	4251.88	2269.38	3269.08	2288.83	2470.83	3806.1	2611.19				3557.6	3010.08	3132.29	2120.23	1413.83	2385.83
NUDT1	1085.04	1034.36	581.089	838.504	615.454	1384.67	1277.51	1084.13	705.139	367.312	868.094		881.822	1009.33	957.677		881.826	826.973	1118.32	868.736	968.816	1132.84	960.209	841.777	866.631	1395.98	404.496	856.338	671.173		1418.22	1213.59	1048.42	985.907	980.3	1077.05
NUDT16L1	559.724	649.836		778.316	647.171		859.872	699.534					788.81	828.479	980.138		500.16	595.482	406.281	619.194	1174.81	678.073	815.864	552.264	720.669		797.436	1224.1			979.935	545.852	335.759	549.19	658.492	759.8
NUDT19	546.181	426.241	445.519	301.156	560.426		686.598				435.265			606.494				455.607	480.767		587.692	496.009		535.738	1135.99	618.22			627.765		281.505	400.904		203.252		539.218
NUDT21	374.058		622.093		318.947	422.766	448.901	503.542	395.428	57.3988	320.276	411.889		692.982			493.133		347.952	604.915	319.707				412.373			468.639	486.985		250.59	498.243	540.234	218.081		509.191
NUFIP2	1879.44	1656.93	2397.99	1929.26	2636.16	1613.98	1547.45	1804.97	1457.87	1716.62	1608.34	1619.37	1852.05	1733.67	2140.01	2064.59	1251.77	1437.95	1648.04	1815.63	1451.19	1624.15	1767.17	1698.36	2037.18	1429.04	1764.61	1423.11	1878.71	3209.38	1621.96	1644.67	1854.11	1426.04	1547.36	1623.57
NUMA1	2412.95	3245.29	3109.83	3666.67	3185.34	2581.83	2338.78	2806.32	2701.84	3119.72	2282.7	3278.6	2835.22	3003.98	2164.66	2997.03	2716.6	2439.61	3255.43	3732.08	2892.68	2846.62	2865.19	3422.52	3250.49	2704.41	2695.87	2200.2	2574.41	2446.76	2693.75	3200.78	3101.01	2732.95	3055.69	2631.24
NUP153	2602.53	2691.63	3366.1	2563.28	3196.49	2990.26	2838.81	3129.09	3351.96		2990.03	3754.99	3228.54	2488.35	3563.33	3996.27	2696.3	2203.96	2629.89	2423.69	2667.09	2576.62	2486.05	2709.55	3430.01	3288.76	2687.21	3612.17	3456.06	3327.09	2527.42	2186.8	1902.06	3305.45	2245.68	3077.64
NUP160							550.157	436.796	342.001		348.185			411.284	648.683	569.54	457.227	527.487	518.657		609.2	434.556	227.754				522.129	662.352			397.791	638.607	459.601	368.862		172.436
NUP205	542.652	571.331	675.957		834.963	682.23	286.298	384.604	556.374		703.06	955.436	491.535		613.739			351.72		781.11	349.7	304.551			1307.89	521.771	1328.19	1147.51	504.404	633.701		320.686	85.4088	544.043	346.953	495.925
NUP210	3546.74	2885.61	2799.47	2656.27	2427.05	3514.35	2987.74	3021.84	3356.29	3856.53	3280.47	3187.94	2676.94	2899.3	3610.28	3999.73	3183.61	2955	2946.78	3302.95	3018.07	2642.61	2732.67	3415.57	3390.06	3525.8	3348.18	3711.7	3416.58	3941.58	3055.44	3166.7	3116.03	3364.92	2876.45	2461.26
NUP214	2955.27	1780.93	4292.22	1934.51	4166.09	2008.83	3005.66	1896.16	2638.09	2044.55	2614.92	3072.21	2556.6	1957.53	2092.34	4099.25	1782.88	1514.5	2181.48	2970.99	2570.79	1890.66	2779.82	2456.71	2129.53	2380.39	1757.8	1439.11	3212.47	3443.82	2431.82	2219.86	2648.22	2532.8	1573.73	2134.07
NUP37	3675.03	3514.65	3345.18	4839.96	3174.1	3823.19	3361.09	3862.45	4539.53	4180.23	3942.1	3363.2	4316.11	3744.81	3121.77	2998.89	3733.26	3819.26	4597.92	3183.53	3896.16	4468.33	4252.21	3138.25	3836.3	4102.32	3166.35	6024.85	3311.73	4024.2	3450.93	3549.62	5168.88	2298.15	3335.81	4172.94
NUP43	633.989	511.46		1047.46	936.347	745.517	669.516	1013.92	556.306			331.684	739.948	491.556		724.271	636.172	1104.5	933.577	654.516	646.331	568.179	1154.32	1201.56	875.538	701.375	825.2	943.34	916.491		593.653	532.253	688.489	771.751	330.504	824.028
NUP50	994.091	981.034	569.723	1131.73	679.021		598.748	917.007		1682.68	547.918	1317.28	941.139	1384.22	817.478	608.773	1245.8	1015.54	1506.14	1282.62	1259.32	1143.12			983.287		2371.43	1808.06			729.927		995.6	718.455	544.039
NUP54	1261.23	605.994	1009.46		1233.69	2186.29	1024.91	1176.44	841.548		1175.54		750.29	948.011	1358.15		924.389	682.444	346.594		1011.33	1020.95	1441.97	1052.33	1012.66	803.875	543.108	969.695	627.915		799.056	774.858	963.705	1241.85		700.654
NUP88	2488.92	2575.99	2276.1	2585.5	2583.84	2238.81	2012.67	2387.44	2085.44	2875.46	2820.45	2536.93	2334.33	2212.98	2177.05	3570.75	1922.84	1981.87	2291.07	2358.3	2491.67	2310.54	2688.78	3295.21	2426.34	2347.99	2904.89	2303.59	2444.11	2094.31	2827.77	1950.78	2623.56	2106.84	1526.63	2554.55
NUP93	2493.37	2936.99	2743.78	2803.04	1769.95	3106.78	2503.7	3175.82	2681.58	2885.27	3414.16	3310.46	2361.18	2999.05	3619.15	3440.96	3043.05	2713.24	2898.92	3170.56	3130.76	2832.61	3196.23	2156.55	2678.37	3259.64	2894.27	3124.09	2797.98	3142.2	2763.1	3113.75	2827.84	2678.64	3269.72	2871.74
NUTF2	1959.43	2787.27	1021.3	2047.63	1807.68	856.662	2651.1	2176.96	2571.5	2544.82	2001.09	2231.67	2288.52	2362.21	3381.29	1849.2	1454.43	1889.25	1766.37	2131.38	2967.82	2582.53	1964.72	2755.97	2343.04	3087.91	1747.36	2883.71	2500.23	2170.24	2214.51	1778.33	1670.78	2438.52		2198.44
NXF1	2413.77	1541.54	2868.9	4905.68	2487.71		1907.75	1981.93	2103.75		3072.11	1207	3399.38	1135.4	3679.09	2963.39	2359.36	1957.45	1958.97		2461.9	1920.49	2880.98	3956.29	1989.42	2023.76	3220.53	2425.42	1646.53		2587.84	2679.71		2093.83		2449.22
OAT	6355.08	8270.11	5056.88	5730.4	4457.04	7744.22	7153.25	6573.16	6564.16	3949.96	5332.02	3340.09	6414.81	5566.38	5712.54	4118.26	6619.61	6047.82	6879.17	5283.52	6627.91	6628.47	5721.17	6289.63	6121.81	6249.83	6204.37	7045.7	5085.96	1579.61	6950.91	6795.16	7550.06	5790.69	7084.03	6407.68
OCRL	1938.13	1772.21	1752.47	2134.72	1716.41	1812.96	1913.05	2141.53	2174.67	1695.71	2059.85	3244.84	1966.02	2234.98	1816.89	2194	1373.04	2001.53	2073.83	1474.37	1631.24	1831.06	2006.71	1465.96	1412	1769.65	1586.29	1642.05	2001.71	3898.24	1316.74	1746.98	2216.97	1731.11	1890.56	1567.83
ODR4													492.462				355.803						573.533					581.891							743.232
OGA	5979.98	5199.94	5876.65	8424.53	8120.69	4937.14	4919.35	7910.67	3868.49	3950.14	4821.7	7148.16	5917.22	6535.11	6564.76	4816.59	5428.05	6457.92	6568.73	6904.41	7034.67	6544.56	7317.3	6534.62	7894.75	6110.71	5737.11	8654.77	5068.58	7478.02	5948.29	6736.14	6085.17	5523.26	6922.13	5550.78
OGDH	4065.02	4720.46	4427.48	4347.68	4662.42	4299.8	4122.07	4653.56	3946.61	4900.7	5085.84	3792.97	5080.87	4757.33	4779.74	3862.09	4098.79	4423.25	3740.02	4378.32	4981.2	5433.36	6771.1	5887.68	5649.5	4676.06	3927.48	5024.88	5014.21	3931.02	4647.66	3501.78	4688.92	4188.6	6197.37	5334.11
OGFOD1	1465.71	1795.61	2260.25	1018.01	1671.63	1252.68	2592.93	1296.65	2074.74	2277.98	1740.37	1558.11	1527.79	2058.64	1984.87	1366.36	1531.59	2037.51	1564.2	996.483	1895.37	1858.06	1782.18	881.126	1841.42	2610.59	1250	1263.79	2093.4		1758.75	1440.26	1325.29	1640.79	1586.42	1474.6
OGT	2952.69	2817.26	2344.94	2722.6	3287.52	2916.74	3008.05	3362.28	3164.99	5790.7	3359.54	2702.68	2534.79	3000.2	3366.01	3251.59	2621.71	2891.84	2764.53	2473.43	2509.29	3214.15	2847.39	2569.92	3206.53	3278.48	2782.61	2987.62	3786.14	2866.93	3700.53	2868.75	3085.92	3698.02	3759.35	3222.51
OLA1	19140.8	20172.3	15071.4	17388.3	15082.5	18698.2	19049.3	17937.3	19570.6	14741.1	16892.4	15753.2	17268.2	12881.7	19878.1	18822.5	15806.5	14287.6	17663.6	13983.8	18732.4	19351.2	18425.2	18804.6	17319.9	20298	16468.6	20906.5	15371.6	10891.5	17347.2	17159.9	17450.2	16983.2	17550.1	16188.9
OPA1	2412.49	2812.07	2152.8	2329.76	1971.73	2117.31	2640.74	2721.52	2411.58	1566	2615.4	2256.91	3027.61	2995.46	2658.84	2587.37	3058.63	2285.04	2836.8	2682.21	3073.31	2875.7	2734.35	2090.53	2935.34	2367.8	2479.21	2041.47	2849.57	2314.71	2574.18	2619.35	2271.33	2431.55	1832.95	2251.69
OS9		1072.26		1052.06				1066.51					1617.68			1993.56		1438.1	1285.83		1310.66	937.417	1446.86	1427.06			1087.65	2091.09						741.171		1242.17
OSBP	1500.5	1228.2	1066.37	2193.56	1927.31	1340.12	976.52	1694.71	1500.61	2005.97	1247.34	1789.2	2799.37	2086.59	1776.23	1797.39	1331.46	1888.53	2440.79	1786.35	2333.34	1249.32	1877.88		2106.66	2073.78	2277.74	1594.51	1324.69		1667.91	2462.34	1878.42	1174.51	1789.54	1183.11
OSBPL9	1276.79	1963.29	1473.28	1799.47	941.304	1337.42	1551.87	1886.59	1741.12	1660.55	1185.38	1229.96	1799.69	2004.55	2063.1	1079.68	2104.55	1535.67	888.229	1718.78	1972.38	2137.33	2121.37	1787.39	1464.38	1762.46	1777.72	2165.63	1490.1	1672.36	2024.15	2038.23	1796.76	1192.16	1572.98	1810.09
OSGEP	1685.73	1590.54	1885.23	1912.09	1600.17	1992.46	1675.29	2008.74	1552.62	1197.24	2417.49	2119.9	2095.75	1014.19	1859.7	1609.22	1547.76	1783.82	1959.85	2163.99	1864.2	1457.09	1754.56	1913.44	1814.25	1542.64	2068.57	2238.47	1931.44	2271.75	1279.66	1448.89	1446.3	1713.32	1308.94	1441.39
OSTC	1597.55	3280.55	5732.07	5893.63	7888.39		1042.97	2175.61	3427.38	1256.3	4867.6	6129.75	5940.99	771.885	328.01	1433.62	1792.45	4988.75	6461.08		1444.29	2357.52	1487.49	788.372	6756.58	2594.01	3567.11	1305.9	8245.89	3387.11	10630.6	2204.8	5725.02	5444.53	3956.66	4404.6
OTUB1	99623.6	98991.5	69824.9	92838.3	68667.5	86039.8	95836.8	82649.6	82833.2	104489	114793	88464.9	124503	130908	103558	69633.1	109854	128186	110812	109430	105945	111523	105309	97065	105770	105722	143036	94020.1	115795	42360.9	12619.3	14904.6	14134.9	118936	121159	155710
OTUB2	795.121	1071.36	1293.04	1222.56			879.497	885.787	721.326		882.005	1515.52	828.864	1135.2		590.483	628.618	1071.53	1469.99		1509.82	1359.75	1729.26	1589.14	1145.09	722.084	1060.15	1601.51	1353.98					549.584	553.887	1742.37
OTUD1		404.058			544.834		705.892	742.956			796.491		385.788	445.519	1079.31		810.809		143.682		515.097		665.944	737.548	475.618	234.86			1060.38					464.966		557.182
OTUD4	7105.79	7390.27	7421.89	6459.49	8696.29	6553.38	6744.61	6822.67	7293.44	8112.46	8608.68	9127.13	8767.55	10029.3	7976.04	8465.2	7005.05	8246.48	5230.76	7549.05	8117.73	7750.54	8625.62	7515.38	7706.61	7115.78	9902.81	6220.38	8503.3	8485.16				7563.42	8984.46	10520.3
OTUD5	746.109		476.922	209.559	531.56	443.257	624.878	774.591	583.001	645.005	1046.26	467.533		1148.19	341.457	1237.45	962.247	748.741			349.862	786.968	360.601	623.977	886.573		582.8	1254.55	500.922					438.076	340.571	949.199
OTUD6B	41962.1	39695.3	43671.2	34944.5	46881.9	39123.6	34081.4	33914.1	41995.2	45062.8	55802.4	56318.8	40940.4	56173.4	38758.1	48600.2	38243.6	40442.1	35067.1	49963.4	34908.4	36761.7	43460	31951.2	53516.4	46773	51219	35343.4	62887.3	46486	3064.22	2261.41	1968.34	54938.4	42635.2	52988.9
OTUD7B	7305.05	7081.32	4798.11	6916.93	5218.56	4276.81	6190.7	5002.93	5261.23	5015.2	9793.53	7508.37	8726.02	10846.3	5139.6	5522.15	2413.42	2424.4	462.501	2100.42	8580.68	7904.93	9829.04	6980.41	8820.39	6118.2	10832.6	4920.72	8059.54	6962.23		870.523	797.845	7713.77	6785.93	10243.9
OXCT1	2065.67	2142.81	1924.37	2186.46	1624.24	2496.06	1707.87	2189.38	1783.33	2192.07	1769.83	1430.14	1846.16	1802.22	1977.51	1714	1957.01	1964.8	1839.89	1891.5	2016.53	2061.22	1661.13	2109.09	1868.07	2007.75	2455.66	2833.51	1256.85	2122.57	1482.79	1825.62	1661.99	1694.11	2198.16	1905.76
OXSM	472.154	842.551	364.381	691.887	749.542	675.259	458.129	478.735	827.942	1235.91	763.911	586.406	582.782	750.804	537.671	371.729	677.439	937.836	526.562	825.641	783.707	190.371	601.259	644.459	702.046	715.825	409.377	461.607	764.221	729.663	531.719	398.455	313.797	493.892	964.686	505.252
OXSR1	1003.82	660.923	1107.69	761.276	923.615	742.708	1117.23	786.336	1019.26	1301.99	460.852	1030.31	765.351	462.687	793.019	770.674	1032.11	645.112	743.656	1177.37	685.166	821.586	728.875	532.102	279.152	778.443	410.449	749.208	1029.79		1277.19	1035.65	938.594	713.289	767.234	681.601
P2RX4	2133.38	1721.88	2265.16	946.633	2368.67	1174.43	1712.79	1352.48	1457.63	1949.55	1389.36	2145.21	1925.46	1322.77	1658.76		1421.57	929.23	1585.92	1582.68	1661.08	1039.38	1170.43		1970.36	1896.31	1079.34		1379.69		2558.35		1101.72	1157.73	1360.57	940.845
P4HA1	4304.62	4662.54	4195.37	4921.64	4568.92	4307.43	3921.85	4931.93	4949.55	6122.78	5274.77	3824.97	3665.98	3888.04	3536.21	4685.56	3493.87	3567.29	4088.57	4109.12	3964.45	3980.98	4234.03	4269.1	4068.26	4428.39	3329.67	4928.63	4135.67	5094.1	4554.93	3760.66	4088.94	3887.41	4821.3	4691.1
P4HA2	1782.67	1548.28	1941.8	1617.25	3791	1914.07	1554.07	2183.71	2564.47	2168.73	2365.37	1009.33	1742.84	1392.35	2539.08	2442.92	2190.28	1725	1611.77	1657.89	1878.28	1714.8	1262.5	2110.25	1020.38	1895.91	2052.96	2004.42	2190.03	3138.44	1664.03	1796.26	1413.2	1752.66	1623.02	2400.22
P4HB	3091.75	1424	4247.85	1377.54	3775.95	1767.26	3675.54	2252.37	3506.32	2434.15	3376.68	6444.75	4359.26	4402.85	4699.19	4881.39	5817.75	5675.18	5764.62	8988.86	2410.47	1430.19	2685.52	1535.95	3306.66	1511.97	2850.34	956.349	3082.31	3815.67	3974.21	2514.48	2487.96	2640.06	1817.43	3210.89
PA2G4	35096.1	33599.8	31080.5	34182.4	29202.1	29537.7	34631.5	33412.2	33741.8	33753.2	29651.1	29887.9	29445.7	33910.1	32218.6	25660.2	28402.1	28961.2	35546.1	28904.4	35766.9	39256.7	32801	34041.1	30261	33598	33189.3	33656.6	38631.2	22867.4	36377.6	31367.2	35804.5	31937.8	35342.2	34152.7
PAAF1	3702.02	4648.11	3737.52	5569.61	4076.06	4418.04	3453.34	5473.63	4145.14	5543.56	4248.73	4770.12	5302.82	5495.32	5356.31	4511.28	4605.73	5687.96	4622.44	5556.48	3926.96	4197.83	4322.33	4725.57	5442.13	4639.86	5193.96	4110.18	4584.62	2477.08	3165.35	3859.28	4660.82	4097.11	4971.42	4140.79
PABPC1	23277.2	18885.2	19284.4	19779.3	18809.5	18918.3	26610.7	18336.5	17850.2	12744.7	22315.4	23421.5	23515.5	25946.1	23855.2	28886	22664.6	25002.2	23955.1	24076.9	26859.6	19425.6	26512.2	22798.4	20843.3	20458.9	20737.2	8449.46	19449.2	15489	23102.9	25104	20913.8	22444.4	19596.6	23296.8
PABPC4	4872.77	4646.51	6258.65	6040.26	3699.8	4294.36	5152.19	4921.75	5183.09	4693.2	4811.89	4811.05	5575.16	4739.09	5606.15	6797.41	5397.59	5002.71	5126.32	4979	4949.91	3097.27	5209.68	5306.54	5130.25	5047.88	5469.56	3279.83	4972.42	1468.77	5397.54	4826	4333.81	5096.85	4287.36	5072.23
PACS1	1017.39	859.017	1623.19	999.362	1072.15	1482.58	968.28	1501.31	1171.27		1449.17	571.09	847.234	1367.01	1670.32	1215.41	1433.69	1313.74	1311.06	911.894	1103.65	609.554	1245.05	1079.03	1152.4	1509.94	864.07	902.556	1896.57	1356.31	993.032	1187.5	1231.88	1197.04	1011.01	924.081
PAF1	4020.3	3761.42	6976.2	4108.81	4963.83	3026.98	4798.52	4151.46	4625.9	4077.46	5272.79	7613.89	4383.3	4454.8	4932.23	6242.06	4684.41	5705.96	4354.87	5822.93	3869.8	3683.03	5069.5	5002.58	5543.8	5646.82	4238.03	4319.95	5500.22	9100.9	4444.95	3854.75	4622.08	4005.48	2167.95	3019.25
[truncated: 1,183 more rows]

## Sheet: DUBS
Genes	3 1 [µM] a	3 1 [µM] b	3 10 [µM] a	3 10 [µM] b	3 50 [µM] a	3 50 [µM] b	3 100 [µM] a	3 100 [µM] b	3 250 [µM] a	3 250 [µM] b	6 1 [µM] a	6 1 [µM] b	6 10 [µM] a	6 10 [µM] b	6 50 [µM] a	6 50 [µM] b	6 100 [µM] a	6 100 [µM] b	6 250 [µM] a	6 250 [µM] b	25 1 [µM] a	25 1 [µM] b	25 10 [µM] a	25 10 [µM] b	25 50 [µM] a	25 50 [µM] b	25 100 [µM] a	25 100 [µM] b	25 250 [µM] a	25 250 [µM] b	Negative control (no HA-Ub-PA)	Negative control (no HA-Ub-PA)	Negative control (no HA-Ub-PA)	Positive control (HA-Ub-PA)	Positive control (HA-Ub-PA)	Positive control (HA-Ub-PA)
[truncated: 50 more rows]
