# Supplementary material
Source: Research Square preprint supplement (doi:10.21203/rs.3.rs-9106698/v1)
Supplement: Supplementary file 2 [file f12ee658158edb6b8c4afa18.pdf]

## Supplementary Information

### Activity-Based Proteomics Discovery of Deubiquitinating Enzyme Inhibitors with Immunomodulatory Activity

Hannah B. L. Jones<sup>1\*Δ</sup>, Simeon D. Draganov<sup>1,2Δ</sup>, Sofia Schönbauer Huamán<sup>3</sup>, Peter A. C. Wing<sup>2</sup>, Chuong Nguyen<sup>4</sup>, Zhu Liang<sup>1,2,9</sup>, Julia Dörner<sup>3</sup>, Jasper Lithgow<sup>3</sup>, Emma Murphy<sup>1</sup>, Alice Beard<sup>1,2</sup>, Angela Chen<sup>1,2</sup>, Andrea Pierangelini<sup>1</sup>, Jack W. Houghton<sup>5</sup>, Mackenzie E. Robert<sup>6</sup>, Sarah Flannery<sup>1</sup>, Cara J. Ellison<sup>7</sup>, Sakshi Sharma<sup>3</sup>, Anthony Tumber<sup>3</sup>, Lynn Wambua<sup>1</sup>, Iolanda Vendrell<sup>1</sup>, Edward W. Tate<sup>5</sup>, Paul R. Elliott<sup>7</sup>, Graham M. West<sup>4</sup>, Darragh P. O'Brien<sup>1</sup>, Eidarus Salah<sup>3</sup>, Andrew P. Turnbull<sup>8</sup>, Christopher J. Schofield<sup>3</sup>, Benedikt M. Kessler<sup>1,2</sup>, Lennart Brewitz<sup>3,10\*</sup>, and Adán Pinto-Fernández<sup>1,2\*</sup>

#### Affiliations:

<sup>1</sup>Target Discovery Institute, Centre for Medicines Discovery, Nuffield Department of Medicine, University of Oxford, Oxford, United Kingdom.

<sup>2</sup>CAMS Oxford Institute and Centre for Medicines Discovery, Nuffield Department of Medicine, University of Oxford, Oxford, United Kingdom.

<sup>3</sup>Chemistry Research Laboratory, Department of Chemistry and the Ineos Oxford Institute for Antimicrobial Research, University of Oxford, Oxford, United Kingdom.

<sup>4</sup>Hit Discovery and Optimization (HDO) Pfizer Inc. Groton, Connecticut, United States of America.

<sup>5</sup>Department of Chemistry, Molecular Sciences Research Hub, Imperial College London, London, United Kingdom.

<sup>6</sup>Discovery Biology and Pharmacology, Pfizer Inc. Groton, Connecticut, United States of America.

<sup>7</sup>Department of Biochemistry, University of Oxford, Oxford, United Kingdom.

<sup>8</sup>Cancer Research Horizons, Francis Crick Institute, London, United Kingdom

<sup>9</sup>Present address: Department of Microbiology, Harvard Medical School, Boston, Massachusetts, United States of America.

<sup>10</sup>Institute of Physical Chemistry, Polish Academy of Sciences, Kasprzaka 44/52, 01-224 Warsaw, Poland.

Equal contributions: Δ

\* **To whom correspondence may be addressed. Email:** hannah.jones@ndm.ox.ac.uk, lennart.brewitz@ichf.edu.pl, or adan.pintofernandez@ndm.ox.ac.uk.

#### This PDF file includes:

- Supplementary Information Text
- Figures S1 to S13
- Tables S1 to S5
- SI References

#### Other supporting materials for this manuscript include the following:

- Supplementary Data S1: Uncropped western blots.
- Supplementary Data S2: Source data for Figure 1C-D.
- Supplementary Data S3: Source data for Figure 2E-J and S3.
- Supplementary Data S4: Source data for Figure 4K-L and S3F-G.
- Supplementary Data S5: Source data for Figure 4K-L and S3F-G.
- Supplementary Data S6: Source data for Figure S1A-C.
- Supplementary Data S7: Source data for Figure S1E.
- Supplementary Data S8: Source data for Figure S1F-I.
- Supplementary Data S9: Source data for Figure S1G.

## Supplementary Information Text

### Synthesis

#### General information

All reagents were from commercial suppliers (Merck, Thermo Fisher Scientific, Enamine). Anhydrous solvents were under an atmosphere of N<sub>2</sub> or Ar gas. All solvents, liquids and solutions were transferred using stainless steel needles and syringes or gas-tight micro-syringes. All solvents used in extractions, work-up procedures, and purifications were of HPLC grade.

Column chromatography was performed using an automated Biotage® Selekt purification machine using Biotage® Sfär Silica D Duo chromatography cartridges. The cartridge size, solvent gradients, and column volumes (CV) used are specified in individual experimental procedures.

High-performance liquid chromatography (HPLC) purification was performed using a Shimadzu Nexera or a Teledyne ACCQPrep HP150 semi-preparative machine, equipped with an Avantor® ACE® 10 AQ preparative column (250 × 21.2 mm) at flow rate of 20 mL/min, using a linear gradient of 2% (v/v) to 98% (v/v) acetonitrile in water (each containing 0.1% (v/v) formic acid) over 45 or 30 min, unless specified otherwise.

Thin layer chromatography (TLC) analyses were performed on Merck silica gel 60 F<sub>254</sub> TLC plates; compounds were visualized under UV light followed by ninhydrin stain.

High resolution mass spectrometry (HRMS) data were recorded in the positive ionization mode via flow injection analysis on an ACQUITY I-Class PLUS UPLC System (Waters, Milford, MA, USA) coupled to an ACQUITY RDa mass spectrometer (Waters, Milford, MA, USA) equipped with an electrospray ionization (ESI) probe.

NMR spectra were recorded using Bruker AVIII HD 400, AVIII HD 600, or AVIII 700 instruments. For <sup>1</sup>H NMR, chemical shifts are reported in ppm downfield from tetramethylsilane, referenced to residual protium in the NMR solvent (DMSO-*d*<sub>6</sub>: δ = 2.50 ppm). For <sup>13</sup>C NMR, chemical shifts are reported in the scale relative to the NMR solvent (DMSO-*d*<sub>6</sub>: δ = 39.52 ppm). Coupling constants are accurate to 0.1 Hz. <sup>19</sup>F NMR chemical shifts are reported in ppm and referenced to an external standard.

IR spectroscopy was performed using a Bruker Tensor-27 Fourier transform infrared (FT-IR) spectrometer. Only purified samples were analyzed.

Optical rotations were determined using a Unipol (Schmidt Haensch) polarimeter at the sample concentrations specified in the individual experimental procedures (in g·100 mL<sup>-1</sup>). Results are reported as [α]<sub>D</sub><sup>T</sup> values in deg·cm<sup>2</sup>·g<sup>-1</sup> at a water bath temperature of T = 25 °C and at the wavelength of the D sodium line (λ = 589 nm).

#### General Synthetic Procedures

##### General Procedure A

A solution of *N,N'*-dicyclohexylcarbodiimide (DCC) (1)(1.08 equiv.) in anhydrous tetrahydrofuran (0.68 M) was added dropwise to a solution of an *N*-Fmoc-protected α-amino acid (1.0 equiv.) and *N*-hydroxysuccinimide (NHS; 1.0 equiv.) in anhydrous tetrahydrofuran (0.19 M) at 0 °C under an atmosphere of N<sub>2</sub> gas. The reaction mixture was stirred while being allowed to warm to ambient temperature overnight (14-17 h). The resultant suspension was then cooled to –20 °C for 1.5 h and filtered through celite®; the filtrate was concentrated under reduced pressure. The crude residue was redissolved in a minimal amount of acetone, cooled to –20 °C for 3 h, and filtered through celite®. The filtrate was concentrated under reduced pressure to afford the corresponding purified NHS-ester, which was used in the following step without further purification.

##### General Procedure B

A solution of a commercially sourced L-Lys(Boc)-OH amine (1.5 equiv.) and anhydrous Na<sub>2</sub>CO<sub>3</sub> (1.5 equiv.) in a tetrahydrofuran:water mixture (2:1<sub>v/v</sub>, 0.10 M) was added dropwise to a solution of an NHS-ester (1.0 equiv.) in tetrahydrofuran (0.17 M) at 0 °C. The reaction mixture was stirred until TLC analysis indicated complete substrate conversion (~1-6 h), before being concentrated under reduced pressure. The crude residue was suspended in ethyl acetate, then washed with aqueous NaHSO<sub>4</sub> (10%<sub>w/v</sub>; 3 times) and brine. The organic layer was dried over anhydrous Na<sub>2</sub>SO<sub>4</sub>, filtered and concentrated under reduced pressure to afford an amide product which was used in the following step without further purification.

#### General Procedure C

An amine hydrochloride salt (1.0 equiv.) was added to a solution of *N*-Boc-glycine (1.1 equiv.) in anhydrous dichloromethane (0.24 M) at ambient temperature. *N*-Methylmorpholine (NMM) (1.1 equiv.), 1-hydroxybenzotriazole hydrate (HOBt) (1.1 equiv.) and *N*-(3-dimethylaminopropyl)-*N'*-ethylcarbodiimide (EDCI) (2) (1.1 equiv.) were then sequentially added to the reaction mixture, which was then stirred until TLC analysis indicated complete conversion (~3-6 h). The reaction mixture was concentrated under reduced pressure; the crude residue was suspended in ethyl acetate and was sequentially washed with aqueous NaHSO<sub>4</sub> (10%<sub>w/v</sub>; 4 times), saturated aqueous NaHCO<sub>3</sub> (3 times), and brine (3 times). The organic layer was dried over anhydrous Na<sub>2</sub>SO<sub>4</sub>, filtered and concentrated under reduced pressure to give the amide product, which was used in the following step without further purification.

#### General Procedure D

HCl in dioxane (4 M; 4.0 equiv.) was added to a solution of an *N*-Boc-protected amine (1.0 equiv.) in anhydrous dichloromethane (0.2 M) at ambient temperature under an atmosphere of N<sub>2</sub>. The reaction mixture was stirred overnight (15-19 h), then concentrated under reduced pressure. The crude amine product was used immediately in the following reaction, without purification,.

#### General Procedure E

*N*-Methylmorpholine (NMM; 1.5 equiv.) and *iso*-butyl chloroformate (IBCF) (1.0 equiv.) were sequentially added to a solution of an *N*-Fmoc-protected α-amino acid (1.0 equiv.) in tetrahydrofuran (0.06 M) at -15 °C under an atmosphere of N<sub>2</sub> gas. The reaction mixture was stirred vigorously for 10 min, then a solution of an amine hydrochloride (1.0 equiv.) in tetrahydrofuran:water (3:1<sub>v/v</sub>, 0.13 M) was added. Additional NMM (1.5 equiv.) was added to the reaction mixture, which was then stirred while warming to ambient temperature over 2 h, before being concentrated under reduced pressure. The crude residue was suspended in water and the suspension was acidified by addition of aqueous H<sub>2</sub>SO<sub>4</sub> (2 N) to pH 1, then extracted with ethyl acetate (3 times); the organic extracts were combined and sequentially washed with saturated aqueous NaHCO<sub>3</sub> and brine, dried over anhydrous Na<sub>2</sub>SO<sub>4</sub>, filtered and concentrated under reduced pressure. The crude amide product was used in the following step without purification.

#### General Procedure F

An excess of *N,N*-diethylamine (~72 equiv.) was added to a suspension of an *N*-Fmoc-protected amine (1.0 equiv.) in acetonitrile (0.13 M). The reaction mixture was stirred until TLC analysis indicated complete conversion (~1-1.5 h), before being concentrated under reduced pressure and being azeotroped with acetonitrile to remove residual *N,N*-diethylamine (3 times). Then, 4-(*N,N*-dimethylamino)pyridine (DMAP) (1.05 equiv.), anhydrous tetrahydrofuran (0.09 M) and acetic anhydride (1.05 equiv.) or trifluoroacetic anhydride (1.05 equiv.) were added sequentially to the crude residue. The resultant mixture was stirred under reflux for 1 h, then cooled to ambient temperature. The reaction mixture was concentrated under reduced pressure, and the crude residue was redissolved in ethyl acetate before being sequentially washed with aqueous HCl (1 M), saturated aqueous NaHCO<sub>3</sub> and brine, dried over anhydrous Na<sub>2</sub>SO<sub>4</sub>, filtered, and concentrated under reduced pressure. The residue was purified via flash column chromatography and/or reversed-phase high-performance liquid chromatography (HPLC) to give the corresponding amine.

### General Procedure G

An *N*-Boc-protected amine (1.0 equiv.) was diluted in formic acid (0.04 M); the resultant mixture was stirred at ambient temperature until TLC analysis indicated complete conversion (~2.5-3 h). The reaction mixture was then concentrated under reduced pressure; the crude residue was suspended in acetonitrile (0.03 M). HCl in dioxane (4 M; 2.0 equiv.) was added to the mixture, which was then sonicated and allowed to sediment. The supernatant was removed before the residue was sonicated in acetonitrile (0.03 M) and allowed to sediment twice more. The supernatant was removed both times, and the resultant solid was dried under reduced pressure and used without further purification as the free deprotected amine.

### General Procedure H

To a solution or suspension of a *N*<sup>α</sup>-acetylated, *N*<sup>ε</sup>-Boc-protected tetrapeptide alkyne (1.0 equiv.) in 2-propanol (0.05 M) was added a solution of HCl in dioxane (4M; ~ 80 equiv.), at ambient temperature under an atmosphere of nitrogen. The reaction mixture was stirred at ambient temperature for 1 h before being concentrated under reduced pressure. The solid residue was suspended in acetonitrile (~ 0.03 M) and sonicated. The dispersed solid was allowed to sediment before the supernatant was removed. The precipitate was dried *in vacuo* to afford the corresponding *N*<sup>ε</sup>-deprotected tetrapeptide alkyne as hydrochloride adduct, which was >95% pure as judged by <sup>1</sup>H and <sup>13</sup>C NMR analysis.

### General Procedure I

A solution of an NHS-ester (1.0 equiv.) in DMF (0.06 M) was added dropwise to a solution of an amine (1.0 equiv.) in saturated aqueous NaHCO<sub>3</sub> (0.28 M) at ambient temperature. The reaction mixture was stirred until TLC analysis indicated complete conversion (~2 h), before being concentrated under reduced pressure. The residue was purified via high-performance liquid chromatography to give the corresponding amide.

### General Procedure J

An excess of *N,N*-diethylamine (72 equiv.) was added to a suspension of an *N*-Fmoc-protected amine (1.0 equiv.) in acetonitrile (0.13 M). The reaction mixture was stirred until TLC analysis indicated complete conversion (~1-1.5 h), before being concentrated under reduced pressure and being azeotroped with acetonitrile to remove residual *N,N*-diethylamine (3 times). The crude amine product was used immediately, without further purification, in the following reaction.

## Synthetic Procedures and Characterization

### 2,5-Dioxopyrrolidin-1-yl (((9*H*-fluoren-9-yl)methoxy)carbonyl)-*L*-leucinate (**I1**)

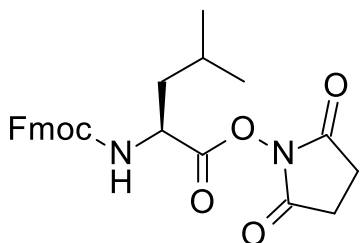

According to General Procedure A, NHS-ester **I1** (3.22 g, apparent quant.) was obtained from Fmoc-L-Leu-OH (2.50 g, 7.1 mmol). Note that <sup>1</sup>H NMR spectroscopy revealed the presence of minor amounts of 2,6-di-*tert*-butyl-4-methylphenol (BHT) (<1%), resulting from the use of THF as solvent that contained BHT as a stabilizer; the product was used without further purification.

White foam; <sup>1</sup>H NMR (500 MHz, DMSO-*d*<sub>6</sub>): δ = 8.12 (d, *J* = 8.1 Hz, 1H), 7.89 (d, *J* = 7.5 Hz, 2H), 7.72-7.69 (m, 2H), 7.42 (t, *J* = 7.4 Hz, 2H), 7.32 (tt, *J* = 7.4, 1.5 Hz, 2H), 4.42 (ddd, *J* = 10.4, 8.0, 4.5 Hz, 1H), 4.36 (d, *J* = 7.0 Hz, 2H), 4.24 (t, *J* = 6.9 Hz, 1H), 2.80 (s, 4H), 1.81-1.69 (m, 2H), 1.68-1.59 (m, 1H), 0.93 (d, *J* = 6.3 Hz, 3H), 0.88 ppm (d, *J* = 6.3 Hz, 3H); <sup>13</sup>C NMR (125 MHz, DMSO-*d*<sub>6</sub>): δ = 170.0 (2C), 169.1, 156.0, 143.8, 143.6, 140.8

(2C), 127.7 (2C), 127.0(7), 127.0(6), 125.2 (2C), 120.2, 120.1, 65.8, 50.5, 46.6, 39.3 (determined by HSQC), 25.5 (2C), 24.1, 22.7, 21.0 ppm; **IR** (film):  $\tilde{\nu}$  = 2957, 2926, 2870, 2853, 1816, 1786, 1740, 1522, 1449, 1362, 1325, 1257, 1206, 1066, 1046  $\text{cm}^{-1}$ ; **HRMS** (ESI):  $m/z$  calculated for  $\text{C}_{25}\text{H}_{26}\text{O}_6\text{N}_2\text{Na}$  [ $M+\text{Na}$ ] $^+$ : 473.1683, found: 473.1681;  $[\alpha]_D^{25} = -31.5$  ( $c = 0.50$ ,  $\text{CHCl}_3$ ).

### 2,5-Dioxopyrrolidin-1-yl (((9H-fluoren-9-yl)methoxy)carbonyl)-D-leucinate (**I2**)

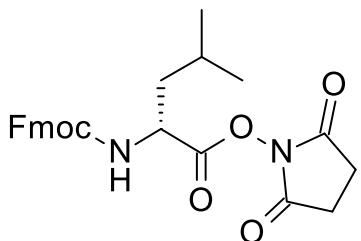

According to General Procedure A, NHS-ester **I2** (1.70 g, 95%) was obtained from Fmoc-D-Leu-OH (1.41 g, 4.0 mmol). Note that  $^1\text{H}$  NMR spectroscopy revealed the presence of minor amounts of BHT (<2%), resulting from the use of THF as solvent contained BHT as a stabilizer; the product was used without further purification.

White foam;  $^1\text{H}$  NMR (500 MHz,  $\text{DMSO}-d_6$ ):  $\delta$  = 8.12 (d,  $J$  = 8.1 Hz, 1H), 7.89 (d,  $J$  = 7.6 Hz, 2H), 7.72-7.69 (m, 2H), 7.42 (t,  $J$  = 7.5 Hz, 2H), 7.32 (tt,  $J$  = 7.4, 1.5 Hz, 2H), 4.43 (ddd,  $J$  = 10.4, 8.0, 4.5 Hz, 1H), 4.36 (d,  $J$  = 7.0 Hz, 2H), 4.24 (t,  $J$  = 6.9 Hz, 1H), 2.80 (s, 4H), 1.79-1.71 (m, 2H), 1.65-1.60 (m, 1H), 0.93 (d,  $J$  = 6.3 Hz, 3H), 0.88 ppm (d,  $J$  = 6.3 Hz, 3H);  $^{13}\text{C}$  NMR (125 MHz,  $\text{DMSO}-d_6$ ):  $\delta$  = 170.0 (2C), 169.1, 156.0, 143.8, 143.6, 140.8 (2C), 127.7 (2C), 127.0(7), 127.0(6), 125.2 (2C), 120.2, 120.1, 65.8, 50.5, 46.6, 39.3 (determined by HSQC), 25.5 (2C), 24.1, 22.7, 21.0 ppm; **IR** (film):  $\tilde{\nu}$  = 2956, 2925, 2870, 2852, 1816, 1786, 1739, 1524, 1450, 1361, 1327, 1258, 1206, 1065, 1046  $\text{cm}^{-1}$ ; **HRMS** (ESI):  $m/z$  calculated for  $\text{C}_{25}\text{H}_{26}\text{O}_6\text{N}_2\text{Na}$  [ $M+\text{Na}$ ] $^+$ : 473.1683, found: 473.1681;  $[\alpha]_D^{25} = +34.6$  ( $c = 0.50$ ,  $\text{CHCl}_3$ ).

### 2,5-Dioxopyrrolidin-1-yl (S)-2-(((9H-fluoren-9-yl)methoxy)carbonyl)amino)-3-cyclohexylpropanoate (**I3**)

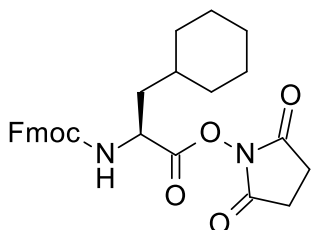

According to General Procedure A, NHS-ester **I3** (1.24 g, 99%) was obtained from Fmoc-L-Cha-OH (1.00 g, 2.6 mmol). Note that  $^1\text{H}$  NMR spectroscopy revealed the presence of minor amounts of BHT (<2%), resulting from the use of THF as solvent that contained BHT as a stabilizer; the product was used without further purification.

White foam;  $^1\text{H}$  NMR (600 MHz,  $\text{DMSO}-d_6$ ):  $\delta$  = 8.11 (d,  $J$  = 8.0 Hz, 1H), 7.90 (d,  $J$  = 7.5 Hz, 2H), 7.71-7.70 (m, 2H), 7.42 (t,  $J$  = 7.4 Hz, 2H), 7.33 (t,  $J$  = 7.5, 2H), 4.45 (ddd,  $J$  = 10.3, 8.0, 4.6 Hz, 1H), 4.38-4.32 (m, 2H), 4.25 (t,  $J$  = 6.9 Hz, 1H), 2.80 (s, 4H), 1.76-1.61 (m, 7H), 1.49-1.42 (m, 1H), 1.24-1.09 (m, 3H), 1.00-0.93 (m, 1H), 0.90-0.84 ppm (m, 1H);  $^{13}\text{C}$  NMR (150 MHz,  $\text{DMSO}-d_6$ ):  $\delta$  = 170.0 (2C), 169.2, 155.9, 143.8, 143.6, 140.7 (2C), 127.7 (2C), 127.1, 127.0, 125.2 (2C), 120.2, 120.1, 65.9, 49.9, 46.6, 38.0, 33.3, 32.9, 31.2, 25.9, 25.7, 25.4(9), 25.4(6) (2C) ppm; **IR** (film):  $\tilde{\nu}$  = 2923, 2851, 1816, 1786, 1740, 1522, 1449, 1361, 1329, 1259, 1205, 1065, 1045  $\text{cm}^{-1}$ ; **HRMS** (ESI):  $m/z$  calculated for  $\text{C}_{28}\text{H}_{30}\text{O}_6\text{N}_2\text{Na}$  [ $M+\text{Na}$ ] $^+$ : 513.1996, found: 513.1994;  $[\alpha]_D^{25} = -22.4$  ( $c = 0.50$ ,  $\text{CHCl}_3$ ).

### 2,5-Dioxopyrrolidin-1-yl (S)-2-(((9H-fluoren-9-yl)methoxy)carbonyl)amino)-2-cyclohexylacetate (**I4**)

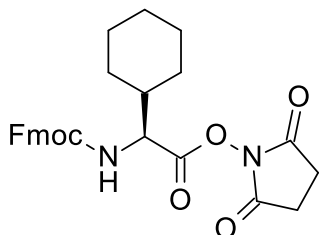

According to General Procedure A, NHS-ester **I4** (1.15 g, 89%) was obtained from Fmoc-L-Chg-OH (1.03 g, 2.7 mmol). Note that  $^1\text{H}$  NMR spectroscopy revealed the presence of minor amounts of BHT (<2%), resulting from the use of THF as solvent that contained BHT as a stabilizer; the product was used without further purification.

White foam;  $^1\text{H}$  NMR (600 MHz,  $\text{DMSO}-d_6$ ):  $\delta$  = 8.12 (d,  $J$  = 8.4 Hz, 1H), 7.89 (d,  $J$  = 7.4 Hz, 2H), 7.75 (d,  $J$  = 7.5 Hz, 1H), 7.73 (d,

$J = 7.5$  Hz, 1H), 7.41 (t,  $J = 7.4$  Hz, 2H), 7.36-7.29 (m, 2H), 4.36-4.30 (m, 3H), 4.24 (t,  $J = 7.2$  Hz, 1H), 2.81 (s, 4H), 1.89-1.84 (m, 1H), 1.80-1.78 (m, 1H), 1.72-1.71 (m, 3H), 1.63-1.61 (m, 1H), 1.28-1.08 (m, 5H);  $^{13}\text{C NMR}$  (150 MHz, DMSO- $d_6$ ):  $\delta = 170.0$  (2C), 167.8, 156.2, 143.8, 143.6, 140.7 (2C), 127.7 (2C), 127.1, 127.0, 125.3(2), 125.2(6), 120.1(1), 120.1(0), 66.0, 57.4, 46.6, 39.1 (determined by HSQC), 28.4, 27.7, 25.5 (2C), 25.4 (3C) ppm; **IR** (film):  $\tilde{\nu} = 2925, 2853, 1815, 1785, 1740, 1527, 1515, 1450, 1358, 1331, 1297, 1247, 1205, 1064, 1033$   $\text{cm}^{-1}$ ; **HRMS** (ESI):  $m/z$  calculated for  $\text{C}_{27}\text{H}_{28}\text{O}_6\text{N}_2\text{Na}$  [ $M+\text{Na}$ ] $^+$ : 499.1840, found: 499.1840;  $[\alpha]_D^{25} = -8.8$  ( $c = 0.50$ ,  $\text{CHCl}_3$ ).

**$N^2$ -((((9H-Fluoren-9-yl)methoxy)carbonyl)-L-leucyl)- $N^6$ -(tert-butoxycarbonyl)-L-lysine (I5)**

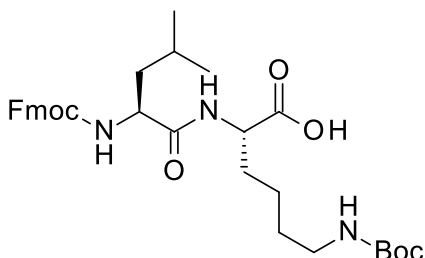

According to General Procedure B, dipeptide **I5** (1.54 g, 98%) was obtained from NHS-ester **I1** (1.22 g, 2.71 mmol). Note that evidence for partial loss (<2%) of the Fmoc group was observed in using  $^1\text{H NMR}$  spectroscopy.

White foam;  $^1\text{H NMR}$  (500 MHz, DMSO- $d_6$ ):  $\delta = 12.50$  (br, 1H), 8.04 (d,  $J = 7.6$  Hz, 1H), 7.89 (d,  $J = 7.6$  Hz, 2H), 7.72 (t,  $J = 7.4$  Hz, 2H), 7.48 (d,  $J = 8.6$  Hz, 1H), 7.41 (t,  $J = 7.4$  Hz, 2H), 7.33-7.30 (m, 2H), 6.74 (t,  $J = 5.4$  Hz, 1H), 4.31-4.19 (m, 3H), 4.15-4.06 (m, 2H), 2.89-2.85 (app. q, 2H), 1.72-1.53 (m, 3H), 1.50-1.39 (m, 2H), 1.38-1.21 (m, 13H), 0.89 (d,  $J = 6.6$  Hz, 3H), 0.85 ppm (d,  $J = 6.6$  Hz, 3H);  $^{13}\text{C NMR}$  (125 MHz, DMSO- $d_6$ ):  $\delta = 173.5, 172.4, 155.8, 155.5, 144.0, 143.7, 140.7$  (2C), 127.6 (2C), 127.0 (2C), 125.3 (2C), 120.1(0), 120.0(7), 77.31, 65.52, 52.82, 51.78, 46.69, 40.73, 39.5 (determined by HSQC), 30.7, 29.1, 28.3 (3C), 24.1, 23.1, 22.8, 21.5 ppm; **IR** (film):  $\tilde{\nu} = 3312, 3066, 3009, 2956, 2927, 2869, 1708, 1665, 1532, 1451, 1407, 1394, 1367, 1338, 1319, 1251, 1171, 1122, 1079, 1044$   $\text{cm}^{-1}$ ; **HRMS** (ESI):  $m/z$  calculated for  $\text{C}_{32}\text{H}_{44}\text{O}_7\text{N}_3$  [ $M+\text{H}$ ] $^+$ : 582.3174, found: 582.3171;  $[\alpha]_D^{25} = -0.2$  ( $c = 0.50$ ,  $\text{CHCl}_3$ ).

**$N^2$ -((((9H-Fluoren-9-yl)methoxy)carbonyl)-D-leucyl)- $N^6$ -(tert-butoxycarbonyl)-L-lysine (I6)**

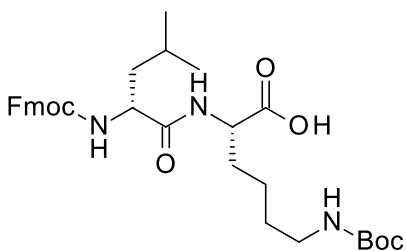

According to General Procedure B, dipeptide **I6** (605 mg, 94%) was obtained from NHS-ester **I2** (500 mg, 1.1 mmol).

White foam;  $^1\text{H NMR}$  (600 MHz, DMSO- $d_6$ ):  $\delta = 12.56$  (br, 1H), 8.12 (d,  $J = 7.9$  Hz, 1H), 7.89 (d,  $J = 7.5$  Hz, 2H), 7.73 (t,  $J = 7.6$  Hz, 2H), 7.45 (d,  $J = 8.8$  Hz, 1H), 7.41 (t,  $J = 7.4$  Hz, 2H), 7.33-7.30 (m, 2H), 6.73 (t,  $J = 5.5$  Hz, 1H), 4.29-4.19 (m, 3H), 4.16-4.11 (m, 2H), 2.90-2.81 (m, 2H), 1.70-1.64 (m, 1H), 1.64-1.53 (m, 2H), 1.51-1.46 (m, 1H), 1.42-1.30 (m, 12H), 1.27-1.18 (m, 2H), 0.89 (d,  $J = 6.6$  Hz, 3H), 0.86 ppm (d,  $J = 6.6$  Hz, 3H);  $^{13}\text{C NMR}$  (150 MHz, DMSO- $d_6$ ):  $\delta = 173.5, 172.3, 155.8, 155.5, 143.9, 143.7, 140.7$  (2C), 127.6 (2C), 127.0(4), 127.0(1), 125.4, 125.3, 120.1 (2C), 77.3, 65.6, 52.9, 51.7, 46.7, 41.2, 39.4 (determined by HSQC), 30.8, 28.9, 28.3 (3C), 24.2, 23.0, 22.6, 21.5 ppm; **IR** (film):  $\tilde{\nu} = 3311, 3069, 3019, 2954, 2927, 2864, 2854, 1712, 1662, 1529, 1479, 1451, 1412, 1367, 1319, 1252, 1172, 1122, 1079, 1044$   $\text{cm}^{-1}$ ; **HRMS** (ESI):  $m/z$  calculated for  $\text{C}_{32}\text{H}_{42}\text{O}_7\text{N}_3$  [ $M-\text{H}$ ] $^-$ : 580.3028, found: 580.3022;  $[\alpha]_D^{25} = +26.2$  ( $c = 0.50$ ,  $\text{CHCl}_3$ ).

***N*<sup>2</sup>-((*S*)-2-(((9*H*-Fluoren-9-yl)methoxy)carbonyl)amino)-3-cyclohexylpropanoyl)-*N*<sup>6</sup>-(*tert*-butoxycarbonyl)-*L*-lysine (**17**)**

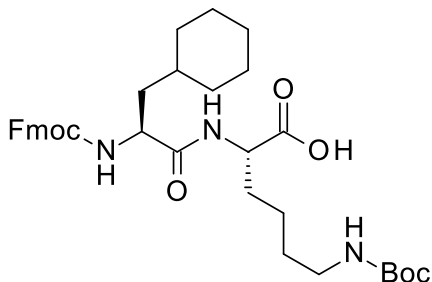

According to General Procedure B, dipeptide **17** (823 mg, 92%) was obtained from NHS-ester **I3** (706 mg, 1.4 mmol).

White foam; <sup>1</sup>H NMR (500 MHz, DMSO-*d*<sub>6</sub>): δ = 12.50 (br, 1H), 8.03 (d, *J* = 7.7 Hz, 1H), 7.89 (d, *J* = 7.6 Hz, 2H), 7.73-7.71 (m, 2H), 7.48 (d, *J* = 8.5 Hz, 1H), 7.42 (t, *J* = 7.3 Hz, 2H), 7.33-7.30 (m, 2H), 6.73 (t, *J* = 5.4 Hz, 1H), 4.31-4.27 (m, 1H), 4.24-4.20 (m, 2H), 4.15-4.08 (m, 2H), 2.89-2.85 (app. q, 2H), 1.72-1.51 (m, 7H), 1.50-1.41 (m, 2H), 1.37-1.16 (m, 15H), 1.16-1.07 (m, 2H), 0.93-0.81 ppm (m, 2H); <sup>13</sup>C NMR (125 MHz, DMSO-*d*<sub>6</sub>):

δ = 173.5, 172.5, 155.8, 155.5, 143.9, 143.8, 140.72 (2C), 127.6 (2C), 127.0 (2C), 125.3 (2C), 120.1 (2C), 77.3, 65.6, 52.2, 51.8, 46.7, 39.5 (determined by HSQC), 39.0 (determined by HSQC), 33.4, 33.2, 31.8, 30.7, 29.1, 28.3 (3C), 26.1, 25.9, 25.7, 22.7 ppm; IR (film): ν̄ = 3309, 3063, 2925, 2852, 1701, 1669, 1533, 1524, 1478, 1450, 1407, 1395, 1367, 1277, 1249, 1171, 1134, 1107, 1082, 1043 cm<sup>-1</sup>; HRMS (ESI): *m/z* calculated for C<sub>35</sub>H<sub>46</sub>O<sub>7</sub>N<sub>3</sub> [*M*-H]<sup>-</sup>: 620.3341, found: 620.3332; [α]<sub>D</sub><sup>25</sup> = +1.7 (c = 0.50, CHCl<sub>3</sub>).

***N*<sup>2</sup>-((*S*)-2-(((9*H*-Fluoren-9-yl)methoxy)carbonyl)amino)-2-cyclohexylacetyl)-*N*<sup>6</sup>-(*tert*-butoxycarbonyl)-*L*-lysine (**18**)**

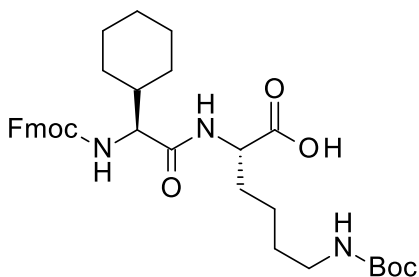

According to General Procedure B, dipeptide **18** (435 mg, 87%) was obtained from NHS-ester **I4** (390 mg, 0.8 mmol). Note that evidence for partial loss (<2%) of the Fmoc group was observed using <sup>1</sup>H NMR spectroscopy.

White amorphous solid; <sup>1</sup>H NMR (500 MHz, DMSO-*d*<sub>6</sub>): δ = 12.48 (br, 1H), 8.08 (d, *J* = 7.5 Hz, 1H), 7.89 (d, *J* = 7.6 Hz, 2H), 7.76-7.72 (app.t, 2H), 7.41 (t, *J* = 7.5 Hz, 2H), 7.36-7.30 (m, 3H), 6.73 (t, *J* = 5.4 Hz, 1H), 4.32-4.26 (m, 1H), 4.24-4.19 (m, 2H), 4.15-4.11 (m, 1H), 3.92 (dd, *J* = 9.1, 7.1 Hz, 1H), 2.89-2.85 (app. q, 2H), 1.71-1.53 (m, 8H), 1.37-1.21 (m, 13H), 1.19-0.93 ppm (m, 5H); <sup>13</sup>C

NMR (125 MHz, DMSO-*d*<sub>6</sub>): δ = 173.5, 171.1, 156.0, 155.5, 144.0, 143.8, 140.72, 140.70, 127.6 (2C), 127.0 (2C), 125.4 (2C), 120.0(9), 120.0(6), 77.3, 65.6, 59.2, 51.8, 46.7, 39.6 (determined by HSQC), 39.5 (determined by HSQC), 30.6, 29.1, 29.0, 28.3 (3C), 28.1, 25.9, 25.6(1), 25.5(6), 22.7 ppm; IR (film): ν̄ = 3308, 3069, 3017, 2927, 2853, 1712, 1663, 1526, 1478, 1450, 1411, 1366, 1335, 1288, 1252, 1171, 1139, 1105, 1083, 1057, 1030 cm<sup>-1</sup>; HRMS (ESI): *m/z* calculated for C<sub>34</sub>H<sub>44</sub>O<sub>7</sub>N<sub>3</sub> [*M*-H]<sup>-</sup>: 606.3185, found: 606.3177; [α]<sub>D</sub><sup>25</sup> = +8.3 (c = 0.50, CHCl<sub>3</sub>).

***tert*-Butyl (2-((cyanomethyl)amino)-2-oxoethyl)carbamate (**19**)**

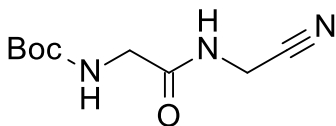

According to General Procedure C, to a solution of Boc-Gly-OH (3.00 g, 17.1 mmol, 1.0 equiv.) in THF (45 mL) were sequentially added *N*-methyl morpholine (1.88 mL, 17.1 mmol, 1.0 equiv.) and isobutyl chloroformate (2.22 mL, 17.1 mmol, 1.0 equiv.) at -25 °C under an atmosphere of nitrogen. Immediately after the formation of a white precipitate, a solution of

aminoacetonitrile sulfate (1.99 g, 9.5 mmol, 1.1 equiv. of the free amine) in precooled water (1.5 mL) and 1 N NaOH (18.9 mL) was added to the mixture. The reaction mixture was allowed to warm to ambient temperature and stirred for 2h before THF was removed under reduced pressure. The residue was diluted with water, adjusted to pH 1 with 2N H<sub>2</sub>SO<sub>4</sub> and extracted three times with ethyl acetate. The combined organic layers were washed with water (1x), a saturated aqueous solution of NaHCO<sub>3</sub> (2x) and brine (1x), dried over Na<sub>2</sub>SO<sub>4</sub> and filtered. After

evaporation of the solvent, the solid residue was recrystallized from cyclohexane / ethyl acetate to afford *tert*-butyl (2-((cyanomethyl)amino)-2-oxoethyl)carbamate **19** (2.18 g, 60%).

White solid; **m.p.**: 113-115 °C; **<sup>1</sup>H NMR** (600 MHz, DMSO-*d*<sub>6</sub>): δ = 8.50 (t, *J* = 5.4 Hz, 1H), 7.06 (t, *J* = 6.0 Hz, 1H), 4.12 (d, *J* = 5.6 Hz, 2H), 3.57 (d, *J* = 6.1 Hz, 2H), 1.38 ppm (s, 9H); **<sup>13</sup>C NMR** (150 MHz, DMSO-*d*<sub>6</sub>): δ = 170.2, 155.8, 117.6, 78.2, 43.0, 28.2 (3C), 27.0 ppm; **IR** (solid):  $\tilde{\nu}$  = 3354, 3319, 2995, 2979, 2942, 1706, 1688, 1671, 1543, 1522, 1432, 1391, 1366, 1350, 1288, 1254, 1239, 1223, 1160, 1081, 1055, 1034 cm<sup>-1</sup>; **HRMS** (ESI): *m/z* calculated for C<sub>9</sub>H<sub>15</sub>O<sub>3</sub>N<sub>3</sub>Na [M+Na]<sup>+</sup>: 236.1006, found: 236.1004.

#### ***tert*-Butyl (2-oxo-2-(prop-2-yn-1-ylamino)ethyl)carbamate (110)**

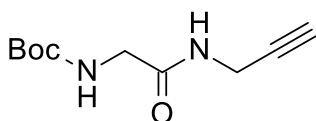

According to General Procedure C, to a solution of Boc-Gly-OH (350 mg, 2.0 mmol, 1.1 equiv.) in anhydrous dichloromethane (7.5 mL) were sequentially added propargylamine (0.12 mL, 1.8 mmol, 1.0 equiv.), N-methyl morpholine (0.22 mL, 2.0 mmol, 1.1 equiv.), HOBt hydrate (306 mg, 2.0 mmol, 1.1 equiv.) and EDCI·HCl (383 mg, 2.0 mmol, 1.1 equiv.) at ambient temperature under an atmosphere of nitrogen. The resulting suspension turned into a solution which was stirred overnight (16 h). The reaction mixture was diluted with ethyl acetate and the resulting suspension was sequentially washed with a 10% aqueous solution of NaHSO<sub>4</sub> (3x), a saturated aqueous solution of NaHCO<sub>3</sub> (3x) and brine (3x). The organic layer was dried over Na<sub>2</sub>SO<sub>4</sub>, filtered and evaporated to afford *tert*-butyl (2-oxo-2-(prop-2-yn-1-ylamino)ethyl)carbamate **110** (193 mg, 50%) which was used in the following step without further purification.

Off-white solid, **m.p.**: 108.0-111.5 °C; **<sup>1</sup>H NMR** (600 MHz, DMSO-*d*<sub>6</sub>): δ = 8.21 (t, *J* = 5.6 Hz, 1H), 6.94 (t, *J* = 6.2 Hz, 1H), 3.85 (dd, *J* = 5.5 Hz, 2.5 Hz, 2H), 3.51 (d, *J* = 6.2 Hz, 2H), 3.09 (t, *J* = 2.6 Hz, 1H), 1.38 ppm (s, 9H); **<sup>13</sup>C NMR** (150 MHz, DMSO-*d*<sub>6</sub>): δ = 169.1, 155.8, 81.1, 78.0, 72.9, 43.0, 28.2 (3C), 27.8 ppm; **IR** (solid):  $\tilde{\nu}$  = 3314, 3297, 3059, 3009, 2981, 2931, 2919, 2850, 1704, 1677, 1677, 1542, 1473, 1454, 1420, 1389, 1368, 1293, 1255, 1235, 1172, 1071, 1050, 1031, 1018 cm<sup>-1</sup>; **HRMS** (ESI): *m/z* calculated for C<sub>10</sub>H<sub>16</sub>O<sub>3</sub>N<sub>2</sub>Na [M+Na]<sup>+</sup>: 235.1053, found: 235.1052.

#### **(9H-Fluoren-9-yl)methyl ((S)-1-(((S)-1-cyano-15,15-dimethyl-3,6,13-trioxo-14-oxa-2,5,12-triazahexadecan-7-yl)amino)-4-methyl-1-oxopentan-2-yl)carbamate (113)**

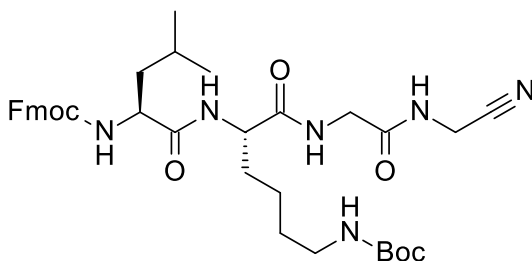

According to General Procedure E, tetrapeptide **113** (2.01 g, 91%) along with minor impurities was obtained from dipeptide **15** (1.91 g, 3.3 mmol) and was used in the next step without further purification. Note that evidence for partial loss (~5%) of the Fmoc group was observed using <sup>1</sup>H NMR and <sup>13</sup>C NMR spectroscopy.

Off-white amorphous solid; **<sup>1</sup>H NMR** (600 MHz, DMSO-*d*<sub>6</sub>): δ = 8.52 (t, *J* = 5.3 Hz, 1H), 8.29 (t, *J* = 5.8 Hz, 1H), 8.00 (d, *J* = 7.3 Hz, 1H), 7.89 (d, *J* = 7.5 Hz, 2H), 7.73-7.70 (m, 2H), 7.50 (d, *J* = 8.5 Hz, 1H), 7.41 (t, *J* = 7.4 Hz, 2H), 7.33-7.31 (m, 2H), 6.71 (t, *J* = 5.5 Hz, 1H), 4.36-4.17 (m, 4H), 4.17-4.00 (m, 3H), 3.76 (dd, *J* = 16.8, 6.1 Hz, 1H), 3.70 (dd, *J* = 16.8, 5.7 Hz, 1H), 2.88-2.84 (m, 2H), 1.73-1.57 (m, 2H), 1.56-1.50 (m, 1H), 1.49-1.39 (m, 2H), 1.38-1.29 (m, 11H), 1.29-1.17 (m, 2H, overlap with an impurity signal at 1.23 ppm), 0.88 (d, *J* = 6.6 Hz, 3H), 0.85 ppm (d, *J* = 6.5 Hz, 3H); **<sup>13</sup>C NMR** (150 MHz, DMSO-*d*<sub>6</sub>): δ = 172.6, 172.0, 169.6, 155.9, 155.5, 143.9, 143.7, 140.7 (2C), 127.6 (2C), 127.0 (2C), 125.3 (2C), 120.1, 120.08, 117.5, 77.3, 65.5, 52.9, 52.8, 46.7, 41.7, 40.6, 39.5 (determined by HSQC), 31.4, 29.2, 28.3 (3C), 27.0, 24.2, 23.1, 22.5, 21.4 ppm; **IR** (solid):  $\tilde{\nu}$  = 3293, 3062, 2956, 2936, 2868, 1688, 1659, 1646, 1530, 1479, 1450, 1404, 1392, 1367, 1336, 1320, 1250, 1171, 1120, 1079, 1044 cm<sup>-1</sup>; **HRMS** (ESI): *m/z* calculated for C<sub>36</sub>H<sub>49</sub>O<sub>7</sub>N<sub>6</sub> [M+H]<sup>+</sup>: 677.3657, found: 677.3658; [α]<sub>D</sub><sup>25</sup> = -17.2 (c = 0.50, MeOH).

**(9H-Fluoren-9-yl)methyl ((R)-1-(((S)-1-cyano-15,15-dimethyl-3,6,13-trioxo-14-oxa-2,5,12-triazahexadecan-7-yl)amino)-4-methyl-1-oxopentan-2-yl)carbamate (I14)**

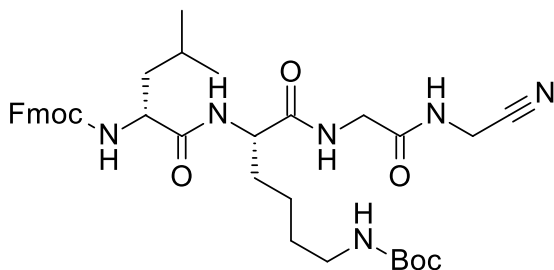

According to General Procedure E, tetrapeptide **I14** (378 mg, 61%) along with minor impurities was obtained from dipeptide **I6** (535 mg, 0.9 mmol), following column chromatography (25 g Sfär; 80 mL/min; initially, 100% dichloromethane (3 CV), followed by a linear gradient (15 CV): 0%<sub>v/v</sub> → 50%<sub>v/v</sub> methanol in dichloromethane). Note that evidence for partial loss (~5%) of the Fmoc group was using <sup>1</sup>H NMR spectroscopy.

Off-white amorphous solid; <sup>1</sup>H NMR (600 MHz, DMSO-*d*<sub>6</sub>): δ = 8.47 (t, *J* = 5.6 Hz, 1H), 8.23 (t, *J* = 6.0 Hz, 1H), 8.20 (d, *J* = 7.7 Hz, 1H), 7.89 (d, *J* = 7.6 Hz, 2H), 7.73-7.70 (app.t, 2H), 7.54 (d, *J* = 8.0 Hz, 1H), 7.41 (t, *J* = 7.4 Hz, 2H), 7.33-7.30 (m, 2H), 6.71 (t, *J* = 5.3 Hz, 1H), 4.32-4.17 (m, 4H), 4.15-4.08 (m, 3H), 3.75 (dd, *J* = 16.7, 6.0 Hz, 1H), 3.70 (dd, *J* = 16.7, 5.8 Hz, 1H), 2.89-2.81 (m, 2H), 1.70-1.62 (m, 1H), 1.61-1.56 (m, 1H), 1.55-1.40 (m, 3H), 1.39-1.27 (m, 11H), 1.26-1.15 (m, 2H, overlap with an impurity signal at 1.23 ppm), 0.89 (d, *J* = 6.5 Hz, 3H), 0.86 ppm (d, *J* = 6.5 Hz, 3H); <sup>13</sup>C NMR (150 MHz, DMSO-*d*<sub>6</sub>): δ = 172.7, 172.0, 169.5, 156.1, 155.5, 143.9, 143.7, 140.7(2), 140.7(0), 127.6 (2C), 127.1, 127.0, 125.3 (2C), 120.1, 120.0(8), 117.5, 77.3, 65.6, 53.1, 52.6, 46.7, 41.7, 40.7, 39.5 (determined by HSQC), 31.3, 29.1, 28.3 (3C), 27.0, 24.2, 22.9, 22.6, 21.6 ppm; IR (solid): ν̄ = 3294, 3067, 2930, 2854, 1689, 1639, 1532, 1450, 1391, 1366, 1342, 1283, 1254, 1234, 1171, 1137, 1085, 1032 cm<sup>-1</sup>; HRMS (ESI): *m/z* calculated for C<sub>36</sub>H<sub>49</sub>O<sub>7</sub>N<sub>6</sub> [M+H]<sup>+</sup>: 677.3657, found: 677.3660; [α]<sub>D</sub><sup>25</sup> = +12.3 (c = 0.50, MeOH).

**(9H-Fluoren-9-yl)methyl ((S)-1-(((S)-1-cyano-15,15-dimethyl-3,6,13-trioxo-14-oxa-2,5,12-triazahexadecan-7-yl)amino)-3-cyclohexyl-1-oxopropan-2-yl)carbamate (I15)**

According to General Procedure E, tetrapeptide **I15** (554 mg, 95%) was obtained from dipeptide **I7** (497 mg, 0.8 mmol) and was used in the next step without further purification. Note that evidence for partial loss (~5%) of the Fmoc group was observed using <sup>1</sup>H NMR spectroscopy.

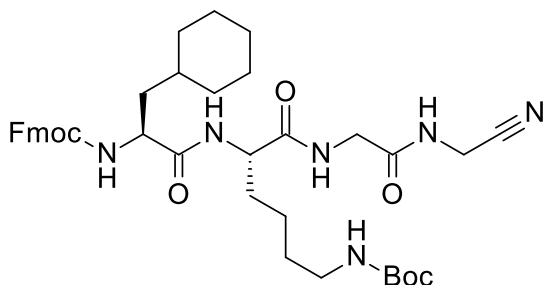

Off-white amorphous solid; <sup>1</sup>H NMR (600 MHz, DMSO-*d*<sub>6</sub>): δ = 8.51 (t, *J* = 5.6 Hz, 1H), 8.27 (t, *J* = 5.8 Hz, 1H), 7.98 (d, *J* = 7.3 Hz, 1H), 7.89 (d, *J* = 7.6 Hz, 2H), 7.73-7.70 (app.t, 2H), 7.51 (d, *J* = 8.4 Hz, 1H), 7.42 (t, *J* = 7.4 Hz, 2H),

7.34-7.30 (m, 2H), 6.71 (t, *J* = 5.3 Hz, 1H), 4.35-4.27 (m, 1H), 4.26-4.16 (m, 3H), 4.14 (d, *J* = 5.6 Hz, 2H), 4.11-4.07 (m, 1H), 3.76 (dd, *J* = 16.8, 5.9 Hz, 1H), 3.70 (dd, *J* = 16.8, 5.5 Hz, 1H), 2.88-2.83 (m, 2H), 1.72-1.56 (m, 6H), 1.55-1.42 (m, 3H), 1.39-1.28 (m, 12H), 1.27-1.14 (m, 3H, overlap with an impurity signal at 1.23 ppm), 1.14-1.07 (m, 2H), 0.93-0.81 ppm (m, 2H); <sup>13</sup>C NMR (150 MHz, DMSO-*d*<sub>6</sub>): δ = 172.7, 172.0, 169.5, 155.9, 155.5, 143.9, 143.7, 140.7 (2C), 127.6 (2C), 127.0 (2C), 125.3 (2C), 120.1 (2C), 117.5, 77.3, 65.5, 52.7, 52.3, 46.6, 41.7, 39.5 (determined by HSQC), 39.0 (determined by HSQC), 33.5, 33.3, 31.6, 31.4, 29.2, 28.2 (3C), 27.0, 26.1, 25.8, 25.6, 22.5 ppm; IR (solid): ν̄ = 3307, 3066, 2925, 2852, 1648, 1525, 1479, 1449, 1404, 1393, 1366, 1336, 1274, 1248, 1170, 1133, 1104, 1082, 1042 cm<sup>-1</sup>; HRMS (ESI): *m/z* calculated for C<sub>39</sub>H<sub>53</sub>O<sub>7</sub>N<sub>6</sub> [M+H]<sup>+</sup>: 717.3970, found: 717.3972; [α]<sub>D</sub><sup>25</sup> = -12.4 (c = 0.50, MeOH).

**(9H-Fluoren-9-yl)methyl ((S)-2-(((S)-1-cyano-15,15-dimethyl-3,6,13-trioxo-14-oxa-2,5,12-triazahexadecan-7-yl)amino)-1-cyclohexyl-2-oxoethyl)carbamate (I16)**

According to General Procedure E, tetrapeptide **I16** (140 mg, 33%) along with minor impurities was obtained from dipeptide **I8** (365 mg, 0.6 mmol) following column chromatography (10 g Sfär; 35 mL/min; initially, 100% ethyl acetate (7 CV), followed by a linear gradient (15 CV): 0%<sub>v/v</sub> → 100%<sub>v/v</sub> acetone in ethyl acetate). Note that evidence for partial loss (~15%) of the Fmoc group was observed by <sup>1</sup>H NMR and <sup>13</sup>C NMR spectroscopy.

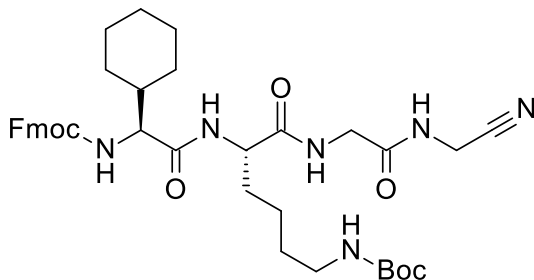

White amorphous solid; <sup>1</sup>H NMR (600 MHz, DMSO-*d*<sub>6</sub>): δ = 8.53 (t, *J* = 5.7 Hz, 1H), 8.30 (t, *J* = 5.6 Hz, 1H), 8.06 (d, 6.9 Hz, 1H), 7.89 (d, *J* = 7.8 Hz, 2H), 7.74 (d, *J* = 7.7 Hz, 1H), 7.72 (d, *J* = 7.9 Hz, 1H), 7.43-7.39 (m, 3H), 7.33-7.31 (m, 2H), 6.71 (t, *J* = 5.4 Hz, 1H), 4.33 (dd, *J* = 9.8, 6.7 Hz, 1H), 4.26-4.21 (m, 2H), 4.19-4.13 (m, 3H), 3.93-3.90 (app.t, 1H), 3.77 (dd, *J* = 16.9, 6.2 Hz, 1H), 3.68 (dd, *J* = 16.8, 5.6 Hz, 1H), 2.88-2.84 (app. q, 2H), 1.87-1.47 (m, 8H), 1.39-1.29 (m, 11H), 1.29-1.18 (m, 2H, overlap with an impurity signal at 1.23 ppm), 1.18-1.03 (m, 3H), 1.01-0.92 ppm (m, 2H); <sup>13</sup>C NMR (150 MHz, DMSO-*d*<sub>6</sub>): δ = 172.0, 171.4, 169.6, 156.0, 155.5, 143.9, 143.7, 140.7(3), 140.7(1), 127.6 (2C), 127.0 (2C), 125.3 (2C), 120.1, 120.0, 117.5, 77.3, 65.5, 59.3, 52.9, 46.7, 41.7, 39.7 (determined by HSQC), 39.6 (determined by HSQC), 31.2, 29.2, 29.0, 28.3 (3C), 28.0, 27.0, 25.8, 25.6 (2C), 22.5 ppm; IR (solid): ν̄ = 3294, 3066, 2929, 2854, 1690, 1641, 1531, 1450, 1392, 1366, 1335, 1284, 1254, 1233, 1170, 1138, 1103, 1085, 1054, 1030 cm<sup>-1</sup>; HRMS (ESI): *m/z* calculated for C<sub>38</sub>H<sub>50</sub>O<sub>7</sub>N<sub>6</sub>Na [M+Na]<sup>+</sup>: 725.3633, found: 725.3629; [α]<sub>D</sub><sup>25</sup> = -7.2 (c = 0.50, MeOH).

**(9H-Fluoren-9-yl)methyl ((S)-1-(((S)-2,2-dimethyl-4,11,14-trioxo-3-oxa-5,12,15-triazaoctadec-17-yn-10-yl)amino)-4-methyl-1-oxopentan-2-yl)carbamate (I17)**

According to General Procedure E, tetrapeptide **I17** (252 mg, 89%) was obtained from dipeptide **I5** (244 mg, 0.4 mmol) and was used in the next step without further purification. Note that evidence for partial loss (~3%) of the Fmoc group was observed using <sup>1</sup>H NMR spectroscopy.

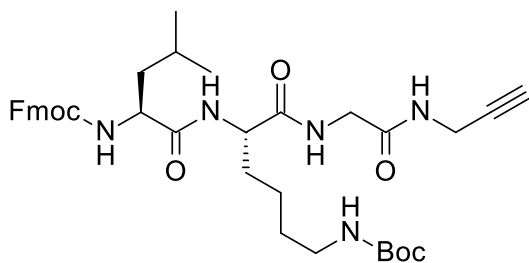

White amorphous solid; <sup>1</sup>H NMR (600 MHz, DMSO-*d*<sub>6</sub>): δ = 8.22 (t, *J* = 5.5 Hz, 1H), 8.16 (t, *J* = 5.8 Hz, 1H), 7.94 (d, *J* = 7.5 Hz, 1H), 7.89 (d, *J* = 7.6 Hz, 2H), 7.73-7.70 (app.t, 2H), 7.51 (d, *J* = 8.3 Hz, 1H), 7.41 (t, *J* = 7.4 Hz, 2H), 7.33-7.30 (m, 2H), 6.71 (t, *J* = 5.3 Hz, 1H), 4.33-4.30 (m, 1H), 4.27-4.25 (m, 1H), 4.23-4.18 (m, 2H), 4.08-4.04 (m, 1H), 3.87 (ddd, *J* = 17.5, 5.6, 2.5 Hz, 1H), 3.84 (ddd, *J* = 17.5, 5.6, 2.5 Hz, 1H), 3.70 (dd, *J* = 16.8, 6.1 Hz, 1H), 3.65 (dd, *J* = 16.7, 5.7 Hz, 1H), 3.09 (t, *J* = 2.5 Hz, 1H), 2.88-2.84 (app. q, 2H), 1.68-1.57 (m, 2H), 1.54-1.40 (m, 3H), 1.39-1.29 (m, 11H), 1.27-1.16 (m, 2H), 0.88 (d, *J* = 6.6 Hz, 3H), 0.85 ppm (d, *J* = 6.5 Hz, 3H); <sup>13</sup>C NMR (150 MHz, DMSO-*d*<sub>6</sub>): δ = 172.4, 171.8, 168.5, 155.9, 155.5, 143.9, 143.7, 140.7 (2C), 127.6 (2C), 127.0 (2C), 125.3 (2C), 120.1, 120.0(7), 81.0, 77.3, 73.0, 65.5, 53.0, 52.6, 46.7, 41.8, 40.6, 39.5 (determined by HSQC), 31.5, 29.2, 28.3 (3C), 27.9, 24.1, 23.1, 22.5, 21.4 ppm; IR (solid): ν̄ = 3292, 3067, 2930, 2866, 1708, 1681, 1632, 1522, 1464, 1450, 1392, 1366, 1335, 1280, 1254, 1233, 1172, 1121, 1081, 1044 cm<sup>-1</sup>; HRMS (ESI): *m/z* calculated for C<sub>37</sub>H<sub>50</sub>O<sub>7</sub>N<sub>5</sub> [M+H]<sup>+</sup>: 676.3705, found: 676.3697; [α]<sub>D</sub><sup>25</sup> = -17.4 (c = 0.25, MeOH).

**(9H-Fluoren-9-yl)methyl ((R)-1-(((S)-2,2-dimethyl-4,11,14-trioxo-3-oxa-5,12,15-triazaoctadec-17-yn-10-yl)amino)-4-methyl-1-oxopentan-2-yl)carbamate (I18)**

According to General Procedure E, tetrapeptide **I18** (496 mg, 94%) along with minor impurities was obtained from dipeptide **I6** (454 mg, 0.8 mmol) and was used in the following step without further purification.

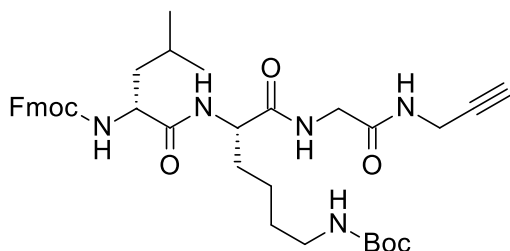

White amorphous solid;  $^1\text{H NMR}$  (400 MHz,  $\text{DMSO-}d_6$ ):  $\delta$  = 8.18-8.11 (m, 3H), 7.89 (d,  $J$  = 7.6 Hz, 2H), 7.73-7.70 (app.t, 2H), 7.53 (d,  $J$  = 7.9 Hz, 1H), 7.41 (t,  $J$  = 7.4 Hz, 2H), 7.32 (tt,  $J$  = 7.4, 1.4 Hz, 2H), 6.71 (t,  $J$  = 5.3 Hz, 1H), 4.32-4.15 (m, 4H), 4.11-4.05 (m, 1H), 3.86 (ddd,  $J$  = 17.5, 5.7, 2.5 Hz, 1H), 3.80 (ddd,  $J$  = 17.5, 5.6, 2.5 Hz, 1H), 3.70 (dd,  $J$  = 16.4, 5.6 Hz, 1H), 3.65 (dd,  $J$  = 16.5,

5.7 Hz, 1H), 3.07 (t,  $J$  = 2.5 Hz, 1H), 2.90-2.81 (m, 2H), 1.70-1.42 (m, 5H), 1.41-1.29 (m, 11H), 1.27- 1.14 (m, 2H), 0.89 (d,  $J$  = 6.5 Hz, 3H), 0.86 ppm (d,  $J$  = 6.5 Hz, 3H);  $^{13}\text{C NMR}$  (150 MHz,  $\text{DMSO-}d_6$ ):  $\delta$  = 172.6, 171.9, 168.4, 156.1, 155.5, 143.9, 143.7, 140.7 (2C), 127.6 (2C), 127.1 (2C), 125.3 (2C), 120.1, 120.0(8), 80.9, 77.3, 73.0, 65.6, 53.2, 52.6, 46.7, 41.8, 40.7, 39.5 (determined by HSQC), 31.3, 29.0, 28.3 (3C), 27.8, 24.2, 22.9, 22.5, 21.6 ppm; **IR** (solid):  $\tilde{\nu}$  = 3295, 3066, 2924, 2853, 1685, 1638, 1534, 1478, 1449, 1404, 1391, 1366, 1322, 1277, 1250, 1235, 1172, 1123, 1105, 1083, 1040  $\text{cm}^{-1}$ ; **HRMS** (ESI):  $m/z$  calculated for  $\text{C}_{37}\text{H}_{50}\text{O}_7\text{N}_5$   $[\text{M}+\text{H}]^+$ : 676.3705, found: 676.3707;  $[\alpha]_D^{25}$  = +11.4 ( $c$  = 0.50, MeOH).

**(9H-Fluoren-9-yl)methyl ((S)-3-cyclohexyl-1-(((S)-2,2-dimethyl-4,11,14-trioxo-3-oxa-5,12,15-triazaoctadec-17-yn-10-yl)amino)-1-oxopropan-2-yl)carbamate (I19)**

According to General Procedure E, tetrapeptide **I19** (536 mg, 97%) along with minor impurities was obtained from dipeptide **I7** (482 mg, 0.8 mmol) and was used in the following step without further purification. Note that evidence for partial loss (~10%) of the Fmoc group was observed by  $^1\text{H NMR}$  and  $^{13}\text{C NMR}$  spectroscopy.

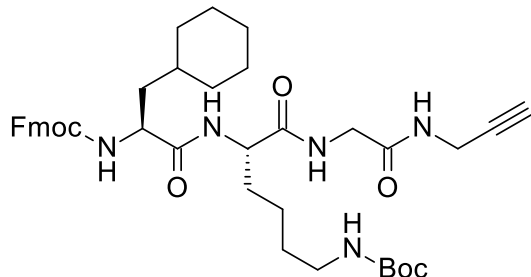

White amorphous solid;  $^1\text{H NMR}$  (600 MHz,  $\text{DMSO-}d_6$ ):  $\delta$  = 8.23 (t,  $J$  = 5.5 Hz, 1H), 8.15 (t,  $J$  = 5.8 Hz, 1H), 7.92 (d,  $J$  = 7.6 Hz, 1H), 7.89 (d,  $J$  = 7.5 Hz, 2H), 7.72-7.70 (app.t, 2H), 7.52 (d,  $J$  = 8.3 Hz, 1H), 7.42 (t,  $J$  = 7.4 Hz, 2H), 7.33-7.31

(m, 2H), 6.71 (t,  $J$  = 5.3 Hz, 1H), 4.34-4.30 (m, 1H), 4.26-4.18 (m, 3H), 4.10-4.06 (m, 1H), 3.87 (ddd,  $J$  = 17.5, 5.5, 2.5 Hz, 1H), 3.84 (ddd,  $J$  = 17.4, 5.5, 2.5 Hz, 1H), 3.71 (dd,  $J$  = 16.7, 6.1 Hz, 1H), 3.65 (dd,  $J$  = 16.6, 5.7 Hz, 1H), 3.09 (t,  $J$  = 2.4 Hz, 1H), 2.87-2.84 (m, 2H), 1.72-1.56 (m, 6H), 1.55-1.41 (m, 3H), 1.39-1.28 (m, 12H), 1.27-1.16 (m, 3H), 1.15-1.07 (m, 2H), 0.93-0.78 ppm (m, 2H);  $^{13}\text{C NMR}$  (150 MHz,  $\text{DMSO-}d_6$ ):  $\delta$  = 172.5, 171.8, 168.5, 155.9, 155.5, 143.9, 143.7, 140.7(2), 140.6(9), 127.6 (2C), 127.1, 127.0, 125.2(8), 125.2(6), 120.1(2), 120.0(9), 81.0, 77.3, 73.0, 65.6, 52.6, 52.4, 46.7, 41.7, 39.6 (determined by HSQC), 39.0 (determined by HSQC), 33.5, 33.3, 31.7, 31.5, 29.2, 28.3 (3C), 27.9, 26.1, 25.9, 25.7, 22.5 ppm; **IR** (solid):  $\tilde{\nu}$  = 3296, 3068, 2924, 2853, 1686, 1638, 1534, 1448, 1404, 1366, 1311, 1276, 1250, 1229, 1172, 1134, 1104, 1087, 1042  $\text{cm}^{-1}$ ; **HRMS** (ESI):  $m/z$  calculated for  $\text{C}_{40}\text{H}_{54}\text{O}_7\text{N}_5$   $[\text{M}+\text{H}]^+$ : 716.4018, found: 716.4020;  $[\alpha]_D^{25}$  = -14.1 ( $c$  = 0.50, MeOH).

**tert-Butyl ((S)-5-(((S)-2-acetamido-4-methylpentanamido)-6-((2-((cyanomethyl)amino)-2-oxoethyl)amino)-6-oxohexyl)carbamate (I20)**

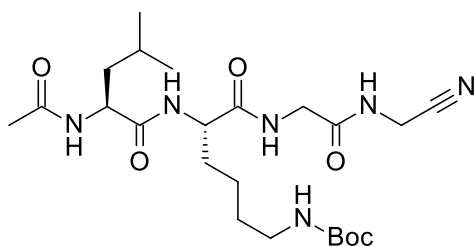

According to General Procedure F, *N*-acetylated peptide **I20** (255 mg, 35%) was obtained from *N*-Fmoc-protected peptide **I13** (1.00 g, 1.5 mmol), following column chromatography (25 g Sfär; 80 mL/min; initially, 100% ethyl acetate (8 CV), followed by a linear gradient (20 CV): 0%<sub>v/v</sub> → 100%<sub>v/v</sub> acetone in ethyl acetate).

White amorphous solid; <sup>1</sup>H NMR (600 MHz, DMSO-*d*<sub>6</sub>): δ = 8.48 (t, *J* = 5.6 Hz, 1H), 8.20 (t, *J* = 5.9 Hz, 1H), 7.99 (d, *J* = 7.9 Hz, 1H), 7.98 (d, *J* = 7.3 Hz, 1H),

6.75 (t, *J* = 5.4 Hz, 1H), 4.30-4.27, (m, 1H), 4.17-4.11 (m, 3H), 3.76 (dd, *J* = 16.8, 6.1 Hz, 1H), 3.69 (dd, 16.8, 5.6 Hz, 1H), 2.89-2.85 (app. q, 2H), 1.84 (s, 3H), 1.68-1.62 (m, 1H), 1.61-1.57 (m, 1H), 1.56-1.49 (m, 2H), 1.47-1.39 (m, 2H), 1.39-1.29 (m, 11H), 1.29-1.16 (m, 2H), 0.88 (d, *J* = 6.6 Hz, 3H), 0.84 ppm (d, *J* = 6.6 Hz, 3H); <sup>13</sup>C NMR (150 MHz, DMSO-*d*<sub>6</sub>): δ = 172.5, 172.0, 169.6, 169.4, 155.5, 117.5, 77.3, 52.7, 51.0, 41.7, 40.5, 39.6 (determined by HSQC), 31.3, 29.2, 28.3 (3C), 27.0, 24.2, 23.1, 22.6, 22.5, 21.6 ppm; IR (solid): ν̄ = 3285, 3067, 2957, 2936, 2870, 1684, 1631, 1539, 1457, 1393, 1367, 1279, 1251, 1172, 1035 cm<sup>-1</sup>; HRMS (ESI): *m/z* calculated for C<sub>23</sub>H<sub>41</sub>O<sub>6</sub>N<sub>6</sub> [*M*+H]<sup>+</sup>: 497.3082, found: 497.3077; [α]<sub>D</sub><sup>25</sup> = -21.0 (c = 0.50, MeOH).

**tert-Butyl ((S)-5-((R)-2-acetamido-4-methylpentanamido)-6-((2-((cyanomethyl)amino)-2-oxoethyl)amino)-6-oxohexyl)carbamate (I21)**

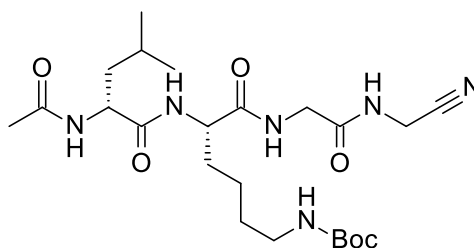

According to General Procedure F, *N*-acetylated peptide **I21** (86 mg, 43%) was obtained from *N*-Fmoc-protected peptide **I14** (357 mg, 0.5 mmol), following column chromatography (10 g Sfär; 35 mL/min; initially, 100% ethyl acetate (7 CV), followed by a linear gradient (15 CV): 0%<sub>v/v</sub> → 100%<sub>v/v</sub> acetone in ethyl acetate).

Off-white amorphous solid; <sup>1</sup>H NMR (600 MHz, DMSO-*d*<sub>6</sub>): δ = 8.40 (t, *J* = 5.6 Hz, 1H), 8.31 (d, *J* = 7.7 Hz, 1H), 8.22 (t, *J* = 6.0 Hz, 1H), 8.04 (t, *J* = 7.3

Hz, 1H), 6.73 (t, *J* = 5.4 Hz, 1H), 4.28 (q, *J* = 7.5 Hz, 1H), 4.18-4.11 (m, 3H), 3.74 (dd, *J* = 16.8, 6.0 Hz, 1H), 3.70 (dd, *J* = 16.7, 6.0 Hz, 1H), 2.91-2.83 (m, 2H), 1.83 (s, 3H), 1.70-1.64 (m, 1H), 1.59-1.49 (m, 2H), 1.42 (t, *J* = 7.3 Hz, 2H), 1.39-1.29 (m, 11H), 1.28-1.16 (m, 2H), 0.90 (d, *J* = 6.5 Hz, 3H), 0.85 ppm (d, *J* = 6.5 Hz, 3H); <sup>13</sup>C NMR (150 MHz, DMSO-*d*<sub>6</sub>): δ = 172.7, 172.1, 169.6, 169.5, 155.5, 117.5, 77.3, 52.7, 51.4, 41.7, 40.8, 39.4 (determined by HSQC), 30.9, 29.0, 28.3 (3C), 27.0, 24.2, 22.7, 22.6, 22.4, 21.9 ppm; IR (solid): ν̄ = 3284, 3067, 2930, 2853, 1656, 1630, 1535, 1439, 1406, 1391, 1367, 1278, 1250, 1172, 1105, 1038, 1017 cm<sup>-1</sup>; HRMS (ESI): *m/z* calculated for C<sub>23</sub>H<sub>39</sub>O<sub>6</sub>N<sub>6</sub> [*M*-H]<sup>-</sup>: 495.2937, found: 495.2937; [α]<sub>D</sub><sup>25</sup> = +1.2 (c = 0.25, MeOH).

**tert-Butyl ((S)-5-((S)-2-acetamido-3-cyclohexylpropanamido)-6-((2-((cyanomethyl)amino)-2-oxoethyl)amino)-6-oxohexyl)carbamate (I22)**

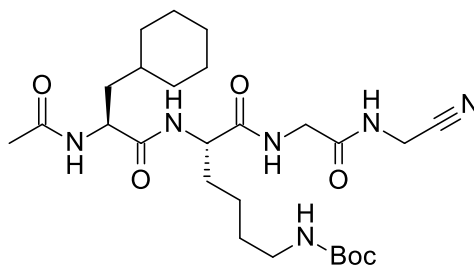

According to General Procedure F, *N*-acetylated peptide **I22** (178 mg, 46%) was obtained from *N*-Fmoc-protected peptide **I15** (717 mg, 0.7 mmol), following column chromatography (25 g Sfär; 80 mL/min; initially, 100% ethyl acetate (7 CV), followed by a linear gradient (15 CV): 0%<sub>v/v</sub> → 100%<sub>v/v</sub> acetone in ethyl acetate).

White amorphous solid; <sup>1</sup>H NMR (600 MHz, DMSO-*d*<sub>6</sub>): δ = 8.48 (t, *J* = 5.6 Hz, 1H), 8.18 (t, *J* = 5.9 Hz, 1H), 7.99 (d, *J* = 7.9 Hz, 1H), 7.96 (d, *J* = 7.5 Hz,

1H), 6.74 (t, *J* = 5.4 Hz, 1H), 4.29 (ddd, *J* = 9.7, 7.9, 5.1 Hz, 1H), 4.17-4.13 (m, 3H), 3.76 (dd, *J* =

16.8, 6.1 Hz, 1H), 3.69 (dd,  $J = 16.8, 5.6$  Hz, 1H), 2.89-2.85 (app. q, 2H), 1.84 (s, 3H), 1.70-1.57 (m, 6H), 1.55-1.50 (m, 1H), 1.49-1.44 (m, 1H), 1.42-1.32 (m, 12H), 1.29-1.23 (m, 2H), 1.22-1.15 (m, 2H), 1.15-1.07 (m, 2H), 1.14-1.07 ppm (m, 2H);  $^{13}\text{C NMR}$  (150 MHz, DMSO- $d_6$ ):  $\delta = 172.6, 172.0, 169.6, 169.4, 155.5, 117.5, 77.3, 52.7, 50.4, 41.7, 39.5$  (determined by HSQC), 39.1 (determined by HSQC), 33.5, 33.2, 31.9, 31.3, 29.2, 28.3 (3C), 27.0, 26.1, 25.8, 25.6, 22.6, 22.5 ppm; **IR** (solid):  $\tilde{\nu} = 3285, 3075, 2924, 2852, 1679, 1631, 1536, 1445, 1393, 1367, 1279, 1251, 1229, 1173, 1038, 1016$   $\text{cm}^{-1}$ ; **HRMS** (ESI):  $m/z$  calculated for  $\text{C}_{26}\text{H}_{45}\text{O}_6\text{N}_6$   $[M+H]^+$ : 537.3395, found: 537.3391;  $[\alpha]_D^{25} = -10.3$  ( $c = 0.50$ , MeOH).

**tert-Butyl ((S)-5-((S)-2-acetamido-2-cyclohexylacetamido)-6-((2-((cyanomethyl)amino)-2-oxoethyl)amino)-6-oxohexyl)carbamate (I23)**

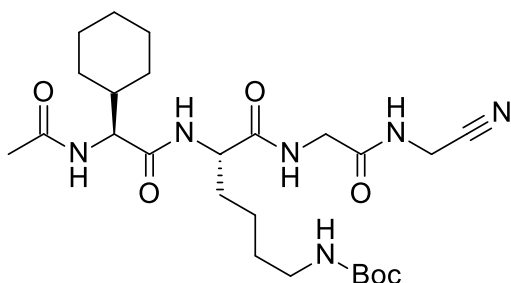

According to a modification of General Procedure F using 2 equiv. of both DMAP (44 mg, 0.36 mmol) and acetic anhydride (34  $\mu\text{L}$ , 0.36 mmol), *N*-acetylated peptide **I23** (22 mg, 23%) along with minor impurities was obtained from *N*-Fmoc-protected peptide **I16** (125 mg, 0.18 mmol), following column chromatography (5 g Sfär; 18 mL/min; initially, 100% ethyl acetate (7 CV), followed by a linear gradient (15 CV): 0% $_{v/v}$   $\rightarrow$  100% $_{v/v}$  acetone in ethyl acetate).

Orange amorphous solid;  $^1\text{H NMR}$  (600 MHz, DMSO- $d_6$ ):  $\delta = 8.50$  (t,  $J = 5.6$  Hz, 1H), 8.21 (t,  $J = 5.8$  Hz, 1H), 8.05 (d,  $J = 7.0$  Hz, 1H), 7.87 (d,  $J = 8.5$  Hz, 1H), 6.74 (t,  $J = 5.5$  Hz, 1H), 4.17-4.10 (m, 4H), 3.77 (dd,  $J = 16.8, 6.1$  Hz, 1H), 3.68 (dd,  $J = 16.8, 5.4$  Hz, 1H), 2.88-2.85 (app. q, 2H), 1.86 (s, 3H), 1.67-1.49 (m, 8H), 1.40-1.31 (m, 11H), 1.30-1.17 (m, 2H, overlap with an impurity signal at 1.23 ppm), 1.16-1.03 (m, 3H), 1.01-0.92 ppm (m, 2H);  $^{13}\text{C NMR}$  (150 MHz, DMSO- $d_6$ ):  $\delta = 172.0, 171.4, 169.6, 169.4, 155.5, 117.5, 77.3, 57.2, 52.9, 41.8, 39.6$  (determined by HSQC), 39.5 (determined by HSQC), 31.1, 29.2, 29.0, 28.3 (3C), 28.1, 27.0, 25.8, 25.6 (2C), 22.6, 22.5 ppm; **IR** (solid):  $\tilde{\nu} = 3284, 3079, 2926, 2853, 1684, 1656, 1629, 1536, 1440, 1392, 1367, 1279, 1251, 1205, 1173, 1145, 1107, 1037, 1017$   $\text{cm}^{-1}$ ; **HRMS** (ESI):  $m/z$  calculated for  $\text{C}_{25}\text{H}_{42}\text{O}_6\text{N}_6\text{Na}$   $[M+\text{Na}]^+$ : 545.3058, found: 545.3054;  $[\alpha]_D^{25} = -11.0$  ( $c = 0.125$ , MeOH).

**tert-Butyl ((S)-5-((S)-2-acetamido-4-methylpentanamido)-6-oxo-6-((2-oxo-2-(prop-2-yn-1-ylamino)ethyl)amino)hexyl)carbamate (I24)**

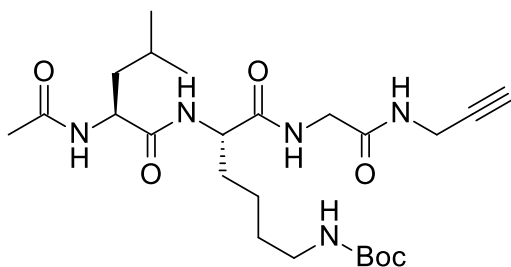

According to General Procedure F, *N*-acetylated peptide **I24** (59 mg, 40%) was obtained from *N*-Fmoc-protected peptide **I17** (200 mg, 0.3 mmol), following column chromatography (10 g Sfär; 35 mL/min; initially, 100% ethyl acetate (10 CV), followed by a linear gradient (20 CV): 0% $_{v/v}$   $\rightarrow$  100% $_{v/v}$  acetone in ethyl acetate).

White amorphous solid;  $^1\text{H NMR}$  (600 MHz, DMSO- $d_6$ ):  $\delta = 8.19$  (t,  $J = 5.6$  Hz, 1H), 8.10 (t,  $J = 5.9$  Hz, 1H), 7.99 (d,  $J = 8.0$  Hz, 1H), 7.94 (d,  $J = 7.5$  Hz, 1H), 6.74 (t,  $J = 5.8$  Hz, 1H), 4.29-4.26 (m, 1H), 4.17-4.14 (m, 1H), 3.88 (ddd,  $J = 17.5, 5.6, 2.6$  Hz, 1H), 3.84 (ddd,  $J = 17.5, 5.6, 2.5$  Hz, 1H), 3.70 (dd,  $J = 16.6, 6.1$  Hz, 1H), 3.64 (dd,  $J = 16.7, 5.7$  Hz, 1H), 3.10 (t,  $J = 2.5$  Hz, 1H), 2.89-2.85 (app. q, 2H), 1.84 (s, 3H), 1.68-1.62 (m, 1H), 1.61-1.56 (m, 1H), 1.54-1.46 (m, 1H), 1.45-1.40 (m, 2H), 1.39-1.29 (m, 11H), 1.28-1.16 (m, 2H), 0.88 (d,  $J = 6.6$  Hz, 3H), 0.84 ppm (d,  $J = 6.6$  Hz, 3H);  $^{13}\text{C NMR}$  (150 MHz, DMSO- $d_6$ ):  $\delta = 172.4, 171.8, 169.4, 168.5, 155.5, 81.0, 77.3, 73.0, 52.7, 51.0, 41.8, 40.5, 39.5$  (determined by HSQC), 31.4, 29.2, 28.3, 27.9, 24.1, 23.1, 22.6, 22.5, 21.6 ppm; **IR** (solid):  $\tilde{\nu} = 3289, 3078, 2957, 2934, 2870, 1632, 1532, 1460, 1440, 1391, 1391, 1367, 1277, 1250, 1171, 1097, 1040, 1016$   $\text{cm}^{-1}$ .

<sup>1</sup>; **HRMS** (ESI): *m/z* calculated for C<sub>24</sub>H<sub>42</sub>O<sub>6</sub>N<sub>5</sub> [M+H]<sup>+</sup>: 496.3130, found: 496.3127; [α]<sub>D</sub><sup>25</sup> = -20.1 (c = 0.25, MeOH).

**tert-Butyl ((S)-5-((R)-2-acetamido-4-methylpentanamido)-6-oxo-6-((2-oxo-2-(prop-2-yn-1-ylamino)ethyl)amino)hexyl)carbamate (I25)**

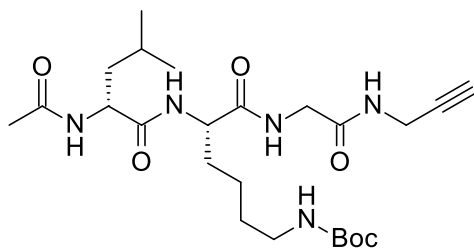

According to General Procedure F, *N*-acetylated peptide **I25** (128 mg, 38%) was obtained from *N*-Fmoc-protected peptide **I18** (456 mg, 0.7 mmol) following column chromatography (25 g Sfär; 80 mL/min; initially, 100% ethyl acetate (7 CV), followed by a linear gradient (15 CV): 0%<sub>v/v</sub> → 100%<sub>v/v</sub> acetone in ethyl acetate).

White amorphous solid; <sup>1</sup>H NMR (600 MHz, DMSO-*d*<sub>6</sub>): δ = 8.28 (d, *J* = 7.7 Hz, 1H), 8.13 (t, *J* = 6.0 Hz, 1H), 8.11 (t, *J* = 5.6 Hz, 1H), 8.05 (d, *J* = 7.3 Hz, 1H),

6.73 (t, *J* = 5.4 Hz, 1H), 4.27 (q, *J* = 7.5 Hz, 1H), 4.15-4.12 (m, 1H), 3.88 (ddd, *J* = 17.6, 5.6, 2.5 Hz, 1H), 3.84 (ddd, *J* = 17.5, 5.6, 2.6 Hz, 1H), 3.68 (dd, *J* = 16.6, 5.9 Hz, 1H), 3.65 (dd, *J* = 16.6, 6.0 Hz, 1H), 3.10 (t, *J* = 2.5 Hz, 1H), 2.91-2.82 (m, 2H), 1.83 (s, 3H), 1.70-1.64 (m, 1H), 1.59-1.47 (m, 2H), 1.43-1.41 (m, 2H), 1.40-1.29 (m, 11H), 1.28-1.16 (m, 2H), 0.90 (d, *J* = 6.6 Hz, 3H), 0.85 ppm (d, *J* = 6.5 Hz, 3H); <sup>13</sup>C NMR (150 MHz, DMSO-*d*<sub>6</sub>): δ = 172.7, 172.0, 169.6, 168.5, 155.5, 81.0, 77.3, 73.0, 52.7, 51.5, 41.8, 40.7, 39.5 (determined by HSQC), 31.0, 29.0, 28.3 (3C), 27.9, 24.2, 22.7, 22.6, 22.4, 21.9 ppm; IR (solid): ν̄ = 3294, 3079, 2956, 2934, 2869, 1683, 1655, 1628, 1537, 1452, 1390, 1367, 1279, 1252, 1218, 1174, 1147, 1096, 1040, 1016 cm<sup>-1</sup>; **HRMS** (ESI): *m/z* calculated for C<sub>24</sub>H<sub>42</sub>O<sub>6</sub>N<sub>5</sub> [M+H]<sup>+</sup>: 496.3130, found: 496.3127; [α]<sub>D</sub><sup>25</sup> = -1.8 (c = 0.25, MeOH).

**tert-Butyl ((S)-5-((S)-2-acetamido-3-cyclohexylpropanamido)-6-oxo-6-((2-oxo-2-(prop-2-yn-1-ylamino)ethyl)amino)hexyl)carbamate (I26)**

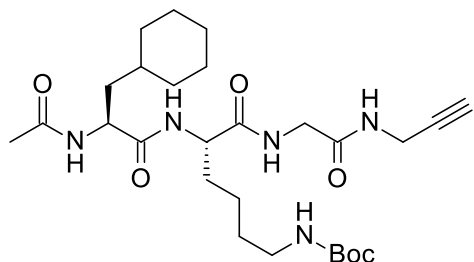

According to General Procedure F, *N*-acetylated peptide **I26** (224 mg, 61%) was obtained from *N*-Fmoc-protected peptide **I19** (491 mg, 0.7 mmol), following column chromatography (25 g Sfär; 80 mL/min; initially, 100% ethyl acetate (7 CV), followed by a linear gradient (15 CV): 0%<sub>v/v</sub> → 100%<sub>v/v</sub> acetone in ethyl acetate).

White amorphous solid; <sup>1</sup>H NMR (600 MHz, DMSO-*d*<sub>6</sub>): δ = 8.19 (t, *J* = 5.5 Hz, 1H), 8.08 (t, *J* = 5.8 Hz, 1H), 7.99 (d, *J* = 7.9 Hz, 1H), 7.92 (d, *J* = 7.6 Hz, 1H), 6.74 (t, *J* = 5.4 Hz, 1H), 4.28 (ddd, *J* = 9.7, 7.9, 5.2 Hz, 1H), 4.18-4.14 (m, 1H), 3.88 (ddd, *J* = 17.3, 5.4, 2.5 Hz, 1H), 3.84 (ddd, *J* = 17.3, 5.3, 2.5 Hz), 3.70 (dd, *J* = 16.7, 6.0 Hz, 1H), 3.64 (dd, *J* = 16.6, 5.6 Hz, 1H), 3.10 (t, *J* = 2.5 Hz, 1H), 2.90-2.83 (m, 2H), 1.84 (s, 3H), 1.69-1.58 (m, 6H), 1.54-1.44 (m, 2H), 1.42-1.30 (m, 12H), 1.29-1.15 (m, 4H), 1.14-1.07 (m, 2H), 0.92-0.79 ppm (m, 2H); <sup>13</sup>C NMR (150 MHz, DMSO-*d*<sub>6</sub>): δ = 172.4, 171.8, 169.4, 168.5, 155.5, 80.9, 77.3, 73.0, 52.6, 50.4, 41.8, 39.6 (determined by HSQC), 39.0 (determined by HSQC), 33.5, 33.2, 31.9, 31.3, 29.2, 28.3 (3C), 27.9, 26.1, 25.8, 25.6, 22.6, 22.5 ppm; IR (solid): ν̄ = 3340, 3302, 3275, 3070, 2930, 2853, 1702, 1676, 1624, 1534, 1446, 1417, 1403, 1391, 1365, 1287, 1248, 1227, 1170, 1129, 1045, 1020, 1004 cm<sup>-1</sup>; **HRMS** (ESI): *m/z* calculated for C<sub>27</sub>H<sub>46</sub>O<sub>6</sub>N<sub>5</sub> [M+H]<sup>+</sup>: 536.3443, found: 536.3435; [α]<sub>D</sub><sup>25</sup> = -13.6 (c = 0.25, MeOH).

**(S)-5-((S)-2-Acetamido-4-methylpentanamido)-6-oxo-6-((2-oxo-2-(prop-2-yn-1-ylamino)ethyl)amino)hexan-1-aminium chloride (25)**

According to General Procedure H, tetrapeptide salt **25** (19 mg, 78%) was obtained from *N*-Boc-protected tetrapeptide **I24** (28 mg, 0.06 mmol).

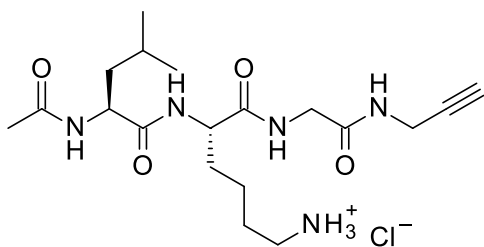

Off-white amorphous solid;  $^1\text{H NMR}$  (600 MHz, DMSO- $d_6$ ):  $\delta$  = 8.26 (t,  $J$  = 5.5 Hz, 1H), 8.11 (t,  $J$  = 5.8 Hz, 1H), 8.05 (d,  $J$  = 7.8 Hz, 1H), 8.02 (d,  $J$  = 7.8 Hz, 1H), 7.80 (br, 3H), 4.26 (q,  $J$  = 7.6 Hz, 1H), 4.22-4.19 (m, 1H), 3.88 (ddd,  $J$  = 17.5, 5.6, 2.5 Hz, 1H), 3.84 (ddd,  $J$  = 17.5, 5.6, 2.5 Hz, 1H), 3.70 (dd,  $J$  = 16.6, 6.0 Hz, 1H), 3.66 (dd,  $J$  = 16.6, 5.9 Hz, 1H), 3.11 (t,  $J$  = 2.5 Hz, 1H), 2.78-2.70 (m, 2H), 1.84

(s, 3H), 1.75 – 1.66 (m, 1H), 1.64 – 1.58 (m, 1H), 1.57 – 1.50 (m, 3H), 1.43 (t,  $J$  = 7.3 Hz, 2H), 1.37 – 1.23 (m, 2H), 0.88 (d,  $J$  = 6.6 Hz, 3H), 0.84 ppm (d,  $J$  = 6.5 Hz, 3H);  $^{13}\text{C NMR}$  (150 MHz, DMSO- $d_6$ ):  $\delta$  = 172.5, 171.7, 169.5, 168.5, 81.0, 73.1, 52.3, 51.2, 41.8, 40.5, 38.6, 31.0, 27.9, 26.5, 24.2, 23.1, 22.5, 22.1, 21.5 ppm; **IR** (solid):  $\tilde{\nu}$  = 3277, 3058, 2980, 2960, 2873, 1633, 1542, 1470, 1438, 1372, 1343, 1290, 1244, 1161, 1129, 1090, 1030  $\text{cm}^{-1}$ ; **HRMS** (ESI):  $m/z$  calculated for  $\text{C}_{19}\text{H}_{34}\text{O}_4\text{N}_5$  [ $M+\text{H}$ ] $^+$ : 396.2605, found: 396.2603;  $[\alpha]_D^{25}$  =  $-37.4$  ( $c$  = 0.25, MeOH).

**(S)-5-((S)-2-Acetamido-3-cyclohexylpropanamido)-6-oxo-6-((2-oxo-2-(prop-2-yn-1-ylamino)ethyl)amino)hexan-1-aminium chloride (26)**

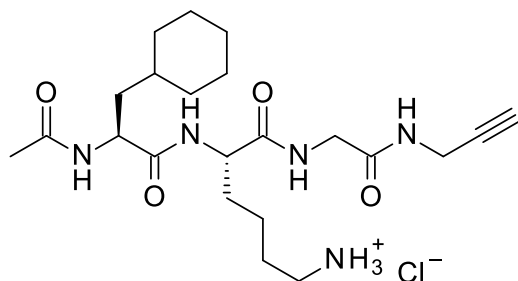

According to General Procedure H, tetrapeptide salt **26** (40 mg, apparent quant.) was obtained from *N*-Boc-protected tetrapeptide **I26** (40 mg, 0.08 mmol).

White amorphous solid;  $^1\text{H NMR}$  (600 MHz, DMSO- $d_6$ ):  $\delta$  = 8.26 (t,  $J$  = 5.5 Hz, 1H), 8.09 (t,  $J$  = 5.8 Hz, 1H), 8.03 (d,  $J$  = 7.7 Hz, 1H), 8.00 (d,  $J$  = 7.8 Hz, 1H), 7.75 (br, 3H), 4.27 (ddd,  $J$  = 9.7, 7.7, 5.2 Hz, 1H), 4.23-4.19 (m, 1H), 3.88 (ddd,  $J$  = 17.5, 5.6, 2.5 Hz, 1H), 3.83 (ddd,  $J$  = 17.5, 5.6, 2.5 Hz, 1H), 3.70 (dd,  $J$  = 16.6, 5.8 Hz, 1H), 3.67

(dd,  $J$  = 16.6, 5.9 Hz, 1H), 3.11 (t,  $J$  = 2.5 Hz, 1H), 2.77 – 2.71 (m, 2H), 1.84 (s, 3H), 1.73 – 1.57 (m, 6H), 1.56 – 1.49 (m, 3H), 1.49 – 1.39 (m, 2H), 1.37 – 1.23 (m, 3H), 1.22 – 1.07 (m, 3H), 0.92 – 0.80 ppm (m, 2H);  $^{13}\text{C NMR}$  (150 MHz, DMSO- $d_6$ ):  $\delta$  = 172.5, 171.7, 169.5, 168.5, 80.9, 73.1, 52.3, 50.5, 41.7, 39.0 (determined by HSQC), 38.6, 33.5, 33.2, 31.9, 31.0, 27.9, 26.5, 26.1, 25.8, 25.6, 22.5, 22.1 ppm; **IR** (solid):  $\tilde{\nu}$  = 3279, 3055, 2926, 2855, 1641, 1538, 1468, 1441, 1372, 1345, 1289, 1256, 1244, 1228, 1160, 1092, 1039  $\text{cm}^{-1}$ ; **HRMS** (ESI):  $m/z$  calculated for  $\text{C}_{22}\text{H}_{38}\text{O}_4\text{N}_5$  [ $M+\text{H}$ ] $^+$ : 436.2918, found: 436.2917;  $[\alpha]_D^{25}$  =  $-24.1$  ( $c$  = 0.25, MeOH).

**(S)-5-((R)-2-Acetamido-4-methylpentanamido)-6-oxo-6-((2-oxo-2-(prop-2-yn-1-ylamino)ethyl)amino)hexan-1-aminium chloride (27)**

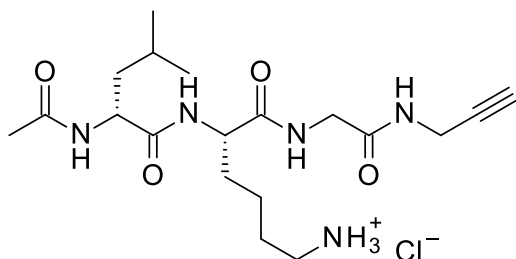

According to General Procedure H, tetrapeptide salt **27** (39 mg, apparent quant.) was obtained from *N*-Boc-protected tetrapeptide **I25** (40 mg, 0.08 mmol).

Pale yellow amorphous solid;  $^1\text{H NMR}$  (600 MHz, DMSO- $d_6$ ):  $\delta$  = 8.29 (d,  $J$  = 7.9 Hz, 1H), 8.18 – 8.15 (m, 2H), 8.09 (d,  $J$  = 7.2 Hz, 1H), 7.75 (br, 3H), 4.25 (q,  $J$  = 7.5 Hz, 1H), 4.19-4.15 (m, 1H), 3.88 (ddd,  $J$  = 17.5, 5.6, 2.6 Hz, 1H), 3.84 (ddd,  $J$  = 17.5, 5.6, 2.6 Hz, 1H), 3.71 – 3.64 (m, 2H), 3.11

(t,  $J = 2.5$  Hz, 1H), 2.78 – 2.69 (m, 2H), 1.84 (s, 3H), 1.74 – 1.68 (m, 1H), 1.60 – 1.48 (m, 4H), 1.43 (t,  $J = 7.3$  Hz, 2H), 1.36 – 1.23 (m, 2H), 0.89 (d,  $J = 6.6$  Hz, 3H), 0.85 ppm (d,  $J = 6.6$  Hz, 3H);  $^{13}\text{C NMR}$  (150 MHz, DMSO- $d_6$ ):  $\delta = 172.6, 171.8, 169.7, 168.4, 81.0, 73.1, 52.4, 51.6, 41.8, 40.6, 38.6, 30.7, 27.9, 26.4, 24.2, 22.8, 22.4, 22.1, 21.9$  ppm; **IR** (solid):  $\tilde{\nu} = 3278, 3054, 2980, 2962, 2934, 1651, 1633, 1542, 1471, 1457, 1437, 1374, 1340, 1283, 1251, 1224, 1160, 1125, 1089, 1030$   $\text{cm}^{-1}$ ; **HRMS** (ESI):  $m/z$  calculated for  $\text{C}_{19}\text{H}_{34}\text{O}_4\text{N}_5$  [ $M+\text{H}$ ] $^+$ : 396.2605, found: 396.2607;  $[\alpha]_D^{25} = -7.3$  ( $c = 0.25$ , MeOH).

**(S)-5-((S)-2-Acetamido-4-methylpentanamido)-6-((2-((cyanomethyl)amino)-2-oxoethyl)amino)-6-oxohexan-1-aminium chloride (28)**

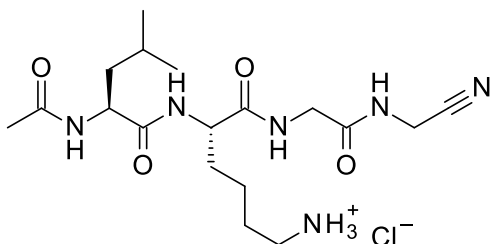

According to General Procedure G, tetrapeptide salt **28** (22 mg, apparent quant.) was obtained from *N*-Boc-protected tetrapeptide **I20** (25 mg, 0.05 mmol).

White amorphous solid;  $^1\text{H NMR}$  (600 MHz, DMSO- $d_6$ ):  $\delta = 8.58$  (t,  $J = 5.6$  Hz, 1H), 8.21 (t,  $J = 5.9$  Hz, 1H), 8.06 (d,  $J = 7.6$  Hz, 1H), 8.05 (d,  $J = 7.8$  Hz, 1H), 7.81 (br, 3H), 4.27 (q,  $J = 7.6$  Hz, 1H), 4.23-4.19 (m, 1H), 4.14 (d,  $J = 5.6$  Hz, 2H), 3.76 (dd,  $J =$

16.8, 6.0 Hz, 1H), 3.72 (dd,  $J = 16.9, 5.8$  Hz, 1H), 2.78 – 2.71 (m, 2H), 1.85 (s, 3H), 1.74 – 1.67 (m, 1H), 1.64 – 1.50 (m, 4H), 1.46-1.41 (m, 2H), 1.38 – 1.25 (m, 2H), 0.88 (d,  $J = 6.6$  Hz, 3H), 0.84 ppm (d,  $J = 6.6$  Hz, 3H);  $^{13}\text{C NMR}$  (150 MHz, DMSO- $d_6$ ):  $\delta = 172.5, 171.9, 169.6, 169.5, 117.5, 52.3, 51.1, 41.7, 40.5, 38.6, 30.9, 27.0, 26.5, 24.2, 23.1, 22.5, 22.1, 21.5$  ppm; **IR** (solid):  $\tilde{\nu} = 3277, 3052, 2980, 2959, 2931, 2872, 1666, 1635, 1537, 1471, 1445, 1415, 1390, 1373, 1339, 1283, 1236, 1162, 1099, 1028$   $\text{cm}^{-1}$ ; **HR-MS** (ESI):  $m/z$  calculated for  $\text{C}_{18}\text{H}_{33}\text{O}_4\text{N}_6$  [ $M+\text{H}$ ] $^+$ : 397.2558, found: 397.2554;  $[\alpha]_D^{25} = -36.8$  ( $c = 0.25$ , MeOH).

**(S)-5-((S)-2-Acetamido-2-cyclohexylacetamido)-6-((2-((cyanomethyl)amino)-2-oxoethyl)amino)-6-oxohexan-1-aminium chloride (29)**

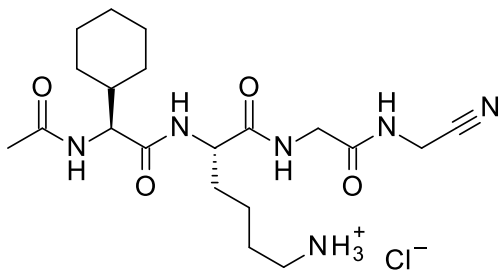

According to General Procedure G, tetrapeptide salt **29** (12 mg, 66%) was obtained from *N*-Boc-protected tetrapeptide **I23** (20 mg, 0.038 mmol).

Orange amorphous solid;  $^1\text{H NMR}$  (600 MHz, DMSO- $d_6$ ):  $\delta = 8.59$  (t,  $J = 5.6$  Hz, 1H), 8.22 (t,  $J = 5.9$  Hz, 1H), 8.11 (d,  $J = 7.3$  Hz, 1H), 7.92 (d,  $J = 8.3$  Hz, 1H), 7.80 (br, 3H), 4.21-4.17 (m, 1H), 4.14-4.12 (m, 3H), 3.76 (dd,  $J = 16.8, 6.1$  Hz, 1H), 3.71 (dd,  $J = 16.8, 5.7$  Hz, 1H), 2.75-2.72 (app.t, 2H), 1.86 (s, 3H), 1.71-1.51 (m, 10H), 1.36-1.27 (m,

2H), 1.15-1.06 (m, 3H), 1.02-0.94 ppm (m, 2H);  $^{13}\text{C NMR}$  (150 MHz, DMSO- $d_6$ ):  $\delta = 171.9, 171.4, 169.6, 169.5, 117.5, 57.4, 52.6, 41.7, 39.6$  (determined by HSQC), 38.6, 30.8, 29.0, 28.2, 27.0, 26.6, 25.8, 25.5(8), 25.5(6), 22.5, 22.1 ppm; **IR** (solid):  $\tilde{\nu} = 3279, 3057, 2927, 2854, 1632, 1546, 1468, 1443, 1403, 1373, 1344, 1291, 1256, 1242, 1161, 1130, 1101, 1032$   $\text{cm}^{-1}$ ; **HRMS** (ESI):  $m/z$  calculated for  $\text{C}_{20}\text{H}_{35}\text{O}_4\text{N}_6$  [ $M+\text{H}$ ] $^+$ : 423.2714, found: 423.2709;  $[\alpha]_D^{25} = -32.0$  ( $c = 0.125$ , MeOH).

**(S)-5-((R)-2-Acetamido-4-methylpentanamido)-6-((2-((cyanomethyl)amino)-2-oxoethyl)amino)-6-oxohexan-1-aminium chloride (30)**

According to General Procedure G, tetrapeptide salt **30** (22 mg, apparent quant.) was obtained from *N*-Boc-protected tetrapeptide **I21** (25 mg, 0.05 mmol).

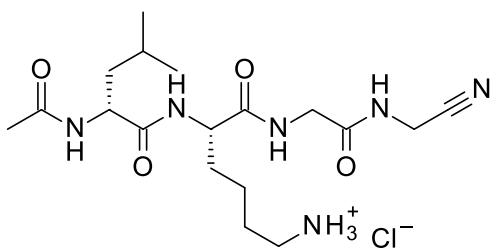

Pale yellow amorphous solid; **<sup>1</sup>H NMR** (600 MHz, DMSO-*d*<sub>6</sub>):  $\delta$  = 8.52 (t, *J* = 5.6 Hz, 1H), 8.37 (d, *J* = 7.8 Hz, 1H), 8.27 (t, *J* = 6.0 Hz, 1H), 8.11 (d, *J* = 7.2 Hz, 1H), 7.86 (br, 3H), 4.26 (q, *J* = 7.4 Hz, 1H), 4.20-4.16 (m, 1H), 4.14-4.13 (m, 2H), 3.76 (dd, *J* = 16.7, 5.9 Hz, 1H), 3.70 (dd, *J* = 16.7, 5.9 Hz, 1H), 2.77-2.69 (m, 2H), 1.84 (s, 3H), 1.75-1.69 (m,

1H), 1.60-1.49 (m, 3H), 1.44 (t, *J* = 7.3 Hz, 2H), 1.36-1.23 (m, 2H), 0.90 (d, *J* = 6.6 Hz, 3H), 0.85 ppm (d, *J* = 6.6 Hz, 3H); **<sup>13</sup>C NMR** (150 MHz, DMSO-*d*<sub>6</sub>):  $\delta$  = 172.7, 171.9, 169.7, 169.5, 117.5, 52.4, 51.6, 41.7, 40.6, 38.5, 30.6, 27.0, 26.4, 24.2, 22.8, 22.4, 22.1, 21.9 ppm; **IR** (solid):  $\tilde{\nu}$  = 3271, 3051, 2955, 2930, 2872, 1657, 1650, 1546, 1535, 1468, 1443, 1412, 1372, 1344, 1284, 1244, 1164, 1100, 1029 cm<sup>-1</sup>; **HRMS** (ESI): *m/z* calculated for C<sub>18</sub>H<sub>33</sub>O<sub>4</sub>N<sub>6</sub> [*M*+*H*]<sup>+</sup>: 397.2558, found: 397.2555; [ $\alpha$ ]<sub>D</sub><sup>25</sup> = -8.1 (c = 0.25, MeOH).

**(S)-5-((S)-2-Acetamido-3-cyclohexylpropanamido)-6-((2-((cyanomethyl)amino)-2-oxoethyl)amino)-6-oxohexan-1-aminium chloride (31)**

According to General Procedure G, tetrapeptide salt **31** (20 mg, 88%) was obtained from *N*-Boc-protected tetrapeptide **I22** (25 mg, 0.05 mmol).

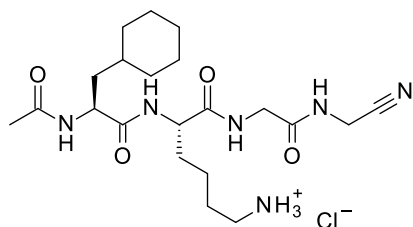

Off-white amorphous solid; **<sup>1</sup>H NMR** (600 MHz, DMSO-*d*<sub>6</sub>):  $\delta$  = 8.58 (t, *J* = 5.6 Hz, 1H), 8.21 (t, *J* = 5.9 Hz, 1H), 8.06-8.04 (m, 2H), 7.83 (br, 3H), 4.27 (ddd, *J* = 9.8, 7.8, 5.1 Hz, 1H), 4.23-4.20 (m, 1H), 4.14 (d, *J* = 5.7 Hz, 2H), 3.76 (dd, *J* = 16.9, 6.1 Hz, 1H), 3.72 (dd, *J* = 17.0, 5.9 Hz, 1H), 2.76-2.71 (m, 2H), 1.85 (s, 3H), 1.74-1.50 (m, 9H), 1.50-1.39 (m, 2H), 1.37-1.23 (m, 3H), 1.21-1.07 (m, 3H), 0.92-0.80 ppm (m, 2H); **<sup>13</sup>C NMR** (150 MHz,

DMSO-*d*<sub>6</sub>):  $\delta$  = 172.6, 171.9, 169.5(4), 169.5(2), 117.5, 52.3, 50.5, 41.7, 39.0 (determined by HSQC), 38.6, 33.5, 33.2, 31.8, 30.9, 27.0, 26.5, 26.1, 25.8, 25.6, 22.5, 22.1 ppm; **IR** (solid):  $\tilde{\nu}$  = 3274, 3060, 2981, 2924, 2852, 1666, 1635, 1540, 1474, 1448, 1417, 1393, 1375, 1354, 1251, 1232, 1179, 1152, 1119, 1074, 1023 cm<sup>-1</sup>; **HRMS** (ESI): *m/z* calculated for C<sub>21</sub>H<sub>37</sub>O<sub>4</sub>N<sub>6</sub> [*M*+*H*]<sup>+</sup>: 437.2871, found: 437.2871; [ $\alpha$ ]<sub>D</sub><sup>25</sup> = -24.1 (c = 0.25, MeOH).

**2,5-Dioxopyrrolidin-1-yl-(((9H-fluoren-9-yl)methoxy)carbonyl)-L-leucinate (I27)**

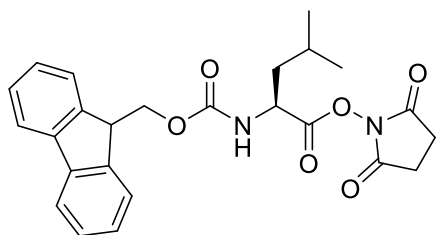

According to General Procedure A, ester **I27** (1.68 g, 65%) was obtained from commercially sourced (((9H-fluoren-9-yl)methoxy)carbonyl)-L-leucine (2.00 g, 5.7 mmol).

Characteristic analytical data: **<sup>1</sup>H NMR** (400 MHz, DMSO-*d*<sub>6</sub>):  $\delta$  = 8.11 (d, *J* = 8.0 Hz, 1H), 7.89 (d, *J* = 7.6 Hz, 2H), 7.70 (dd, *J* = 7.5 Hz, 2H), 7.42 (dd, *J* = 7.9, 6.8 Hz, 2H), 7.32 (tt, *J* = 7.4 Hz, 2H), 4.42 (ddd, *J* = 10.3, 8.0, 4.5 Hz,

1H), 4.36 (d, *J* = 7.0 Hz, 2H), 4.24 (t, *J* = 7.0 Hz, 1H), 2.80 (s, 4H), 1.76 (td, *J* = 10.4, 4.4 Hz, 2H), 1.62 (td, *J* = 10.4, 6.0 Hz, 1H), 0.90 ppm (dd, *J* = 6.2 Hz, 6H); **<sup>13</sup>C NMR** (101 MHz, DMSO-*d*<sub>6</sub>):  $\delta$  = 170.0, 169.1, 156.0, 143.8, 143.6, 140.7, 127.7, 127.1, 125.2, 120.1, 65.8, 50.5, 46.6, 38.9, 25.5, 24.1, 22.7, 21.0 ppm; **HRMS** (ESI): *m/z* calculated for C<sub>25</sub>H<sub>27</sub>N<sub>2</sub>O<sub>6</sub> [*M*+*H*]<sup>+</sup>: 451.1864, found: 451.1874.

### ***N*<sup>2</sup>-(((9*H*-Fluoren-9-yl)methoxy)carbonyl)-*L*-leucyl)-*N*<sup>6</sup>-(*tert*-butoxycarbonyl)-*L*-lysine (**I28**)**

According to General Procedure B, dipeptide **I28** (3.77 g, 97%) was obtained from *N*-hydroxysuccinimide ester **I27** (3.00 g, 6.7 mmol) and commercially sourced *L*-Lys(Boc)-OH (2.47 g, 10.0 mmol).

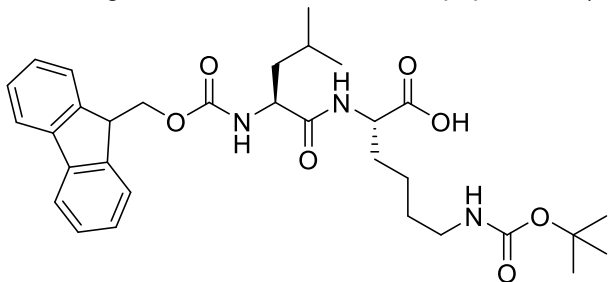

Characteristic analytical data: **<sup>1</sup>H NMR** (400 MHz, DMSO-*d*<sub>6</sub>): δ = δ 12.48 (s, 1H), 8.02 (d, *J* = 7.6 Hz, 1H), 7.88 (d, *J* = 7.5 Hz, 2H), 7.72 (t, *J* = 6.7 Hz, 2H), 7.47 (d, *J* = 8.5 Hz, 1H), 7.41 (td, *J* = 7.5, 1.2 Hz, 2H), 7.31 (tdd, *J* = 7.4, 1.2 Hz, 2H), 6.72 (t, *J* = 5.4

Hz, 1H), 4.34 – 4.17 (m, 3H), 4.09 (m, 2H), 2.87 (q, *J* = 6.5 Hz, 2H), 1.71 – 1.49 (m, 3H), 1.44 (m, 2H), 1.34 (s, 9H), 1.33 – 1.27 (m, 4H), 0.87 ppm (dd, *J* = 6.5 Hz, 6H); **<sup>13</sup>C NMR** (101 MHz, DMSO-*d*<sub>6</sub>): δ = 173.5, 172.4, 155.9, 155.5, 144.0, 143.7, 140.7, 127.6, 127.0, 125.3, 120.1, 77.3, 65.5, 52.8, 51.8, 46.7, 40.8, 39.2, 30.7, 29.1, 28.3, 24.1, 23.1, 22.8, 21.5 ppm; **HRMS** (ESI): *m/z* calculated for C<sub>32</sub>H<sub>44</sub>N<sub>3</sub>O<sub>7</sub> [*M*+*H*]<sup>+</sup>: 582.3174, found: 582.3164.

### ***tert*-Butyl-(2-oxo-2-(prop-2-yn-1-ylamino)ethyl)carbamate (**I29**)**

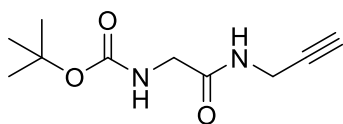

According to General Procedure C, alkyne **I29** (0.94 g, 80%) was obtained from commercially sourced *N*-Boc-glycine (1.1 g, 6.1 mmol) and commercially sourced propargylamine hydrochloride (0.50 g, 5.5 mmol). The characteristic analytical data of **I29** are consistent with those reported(3–6).

Characteristic analytical data: **<sup>1</sup>H NMR** (400 MHz, DMSO-*d*<sub>6</sub>): δ = 8.21 (t, *J* = 5.6 Hz, 1H), 6.94 (t, *J* = 6.2 Hz, 1H), 3.85 (dd, *J* = 5.6, 2.5 Hz, 2H), 3.51 (d, *J* = 5.9 Hz, 2H), 3.09 (t, *J* = 2.5 Hz, 1H), 1.38 ppm (s, 9H); **<sup>13</sup>C NMR** (101 MHz, DMSO-*d*<sub>6</sub>): δ = 169.2, 155.8, 81.1, 78.0, 72.9, 43.0, 28.2, 27.8 ppm; **HRMS** (ESI): *m/z* calculated for C<sub>10</sub>H<sub>16</sub>N<sub>2</sub>O<sub>3</sub>Na [*M*+*Na*]<sup>+</sup>: 235.1053, found: 235.1049.

### ***tert*-Butyl-(2-(but-2-yn-1-ylamino)-2-oxoethyl)carbamate (**I30**)**

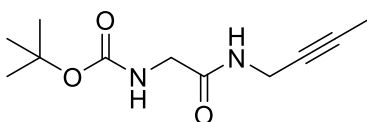

According to General Procedure C, alkyne **I30** (231 mg, 54%) was obtained from commercially sourced *N*-Boc-glycine (365 mg, 2.09 mmol) and commercially sourced but-2-yn-1-amine hydrochloride (200 mg, 1.90 mmol).

Characteristic analytical data: **<sup>1</sup>H NMR** (400 MHz, DMSO-*d*<sub>6</sub>): δ = 8.13 (t, *J* = 5.5 Hz, 1H), 6.92 (t, *J* = 6.2 Hz, 1H), 3.81 (dq, *J* = 4.9, 2.5 Hz, 2H), 3.50 (d, *J* = 6.2 Hz, 2H), 1.76 (t, *J* = 2.5 Hz, 3H), 1.38 ppm (s, 9H); **<sup>13</sup>C NMR** (151 MHz, DMSO-*d*<sub>6</sub>): δ = 169.0, 155.8, 78.0, 77.9, 76.4, 43.0, 28.2, 28.1, 3.0 ppm; **HRMS** (ESI): *m/z* calculated for C<sub>11</sub>H<sub>18</sub>N<sub>2</sub>O<sub>3</sub>Na [*M*+*Na*]<sup>+</sup>: 249.1210, found: 249.1209.

### ***tert*-Butyl-(2-((1-ethynylcyclopropyl)amino)-2-oxoethyl)carbamate (**I31**)**

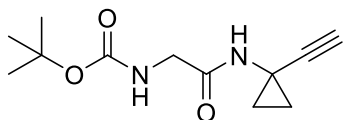

According to General Procedure C, alkyne **I31** (247 mg, 58%) was obtained from commercially sourced *N*-Boc-glycine (345 mg, 1.97 mmol) and commercially sourced 1-ethynylcyclopropanamine hydrochloride (209 mg, 1.78 mmol).

Characteristic analytical data: **<sup>1</sup>H NMR** (400 MHz, DMSO-*d*<sub>6</sub>): δ = 8.42 (s, 1H), 6.84 (t, *J* = 6.1 Hz, 1H), 3.44 (d, *J* = 5.6 Hz, 2H), 2.93 (s, 1H), 1.37 (s, 9H), 1.06 (q, *J* = 4.7 Hz, 2H), 0.91 ppm (q, *J* = 4.6 Hz, 2H); **<sup>13</sup>C NMR** (151 MHz, DMSO-*d*<sub>6</sub>): δ = 169.6, 155.8, 86.4, 78.0, 68.5, 42.9, 28.2, 21.8, 16.8 ppm; **HRMS** (ESI): *m/z* calculated for C<sub>12</sub>H<sub>19</sub>N<sub>2</sub>O<sub>3</sub> [*M*+*H*]<sup>+</sup>: 239.1390, found: 239.1397.

**tert-Butyl-(2-oxo-2-((3-phenylprop-2-yn-1-yl)amino)ethyl)carbamate (I32)**

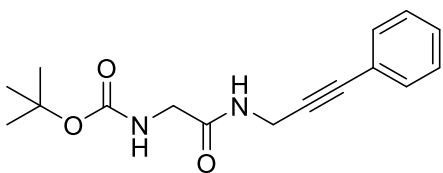

According to General Procedure C, alkyne **I32** (118 mg, 85%) was obtained from commercially sourced *N*-Boc-glycine (94 mg, 0.53 mmol) and commercially sourced 3-phenyl-2-propyn-1-amine hydrochloride (80 mg, 0.48 mmol). The characteristic analytical data of **I32** are consistent with those reported(7).

Characteristic analytical data:  $^1\text{H NMR}$  (400 MHz, DMSO- $d_6$ ):  $\delta$  = 8.32 (t,  $J$  = 5.5 Hz, 1H), 7.45 – 7.33 (m, 5H), 6.97 (t,  $J$  = 6.2 Hz, 1H), 4.13 (d,  $J$  = 5.5 Hz, 2H), 3.55 (d,  $J$  = 6.2 Hz, 2H), 1.38 ppm (s, 9H);  $^{13}\text{C NMR}$  (151 MHz, DMSO- $d_6$ ):  $\delta$  = 169.3, 155.8, 131.4, 128.7, 128.6, 122.3, 87.1, 81.6, 78.1, 43.1, 28.6, 28.2 ppm; **HRMS** (ESI):  $m/z$  calculated for  $\text{C}_{16}\text{H}_{20}\text{N}_2\text{O}_3\text{Na}$  [ $M+\text{Na}$ ] $^+$ : 311.1366, found: 311.1372.

**(9H-Fluoren-9-yl)methyl-((S)-1-(((S)-2,2-dimethyl-4,11,14-trioxo-3-oxa-5,12,15-triazaoctadec-17-yn-10-yl)amino)-4-methyl-1-oxopentan-2-yl)carbamate (I38)**

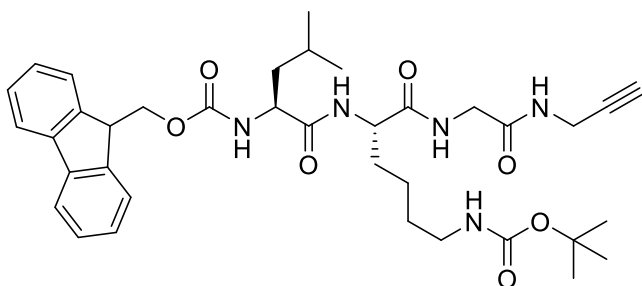

According to General Procedure D, amine hydrochloride **I33** was obtained *in situ* from *N*-Boc-protected peptide **I29** (0.10 mg, 0.48 mmol) and was directly used in the following reaction: According to General Procedure E, tetrapeptide **I38** (0.33 g, apparent quantitative) was obtained from dipeptide **I28** (0.27 g, 0.46 mmol) and amine hydrochloride **I33**.

Characteristic analytical data:  $^1\text{H NMR}$  (400 MHz, DMSO- $d_6$ ):  $\delta$  = 8.24 (t,  $J$  = 5.6 Hz, 1H), 8.18 (t,  $J$  = 5.9 Hz, 1H), 7.96 (d,  $J$  = 7.5 Hz, 1H), 7.92 – 7.85 (m, 2H), 7.72 (t,  $J$  = 6.9 Hz, 2H), 7.52 (d,  $J$  = 8.4 Hz, 1H), 7.41 (td,  $J$  = 7.5, 1.1 Hz, 2H), 7.32 (tt,  $J$  = 7.4, 1.4 Hz, 2H), 6.71 (t,  $J$  = 5.7 Hz, 1H), 4.37 – 4.15 (m, 4H), 4.11 – 3.98 (m, 1H), 3.86 (dt,  $J$  = 6.0, 2.2 Hz, 2H), 3.77 – 3.60 (dd,  $J$  = 6.3 Hz, 2H), 3.09 (t,  $J$  = 2.5 Hz, 1H), 2.86 (q,  $J$  = 6.6 Hz, 2H), 1.67 – 1.55 (m, 2H), 1.55 – 1.37 (m, 3H), 1.41 – 1.13 (m, 4H), 1.34 (s, 9H), 0.87 ppm (dd,  $J$  = 13.1, 6.5 Hz, 6H);  $^{13}\text{C NMR}$  (101 MHz, DMSO- $d_6$ ):  $\delta$  = 172.5, 171.9, 168.5, 155.9, 155.5, 144.0, 143.7, 140.7, 127.6, 127.1, 125.3, 120.1, 81.0, 77.3, 73.0, 65.5, 53.0, 52.7, 46.7, 41.8, 40.6, 39.5, 31.6, 29.2, 28.3, 27.9, 24.2, 23.1, 22.5, 21.4 ppm; **HRMS** (ESI):  $m/z$  calculated for  $\text{C}_{37}\text{H}_{50}\text{N}_5\text{O}_7$  [ $M+\text{H}$ ] $^+$ : 676.3705, found: 676.3696.

**(9H-Fluoren-9-yl)methyl-((S)-1-(((S)-2,2-dimethyl-4,11,14-trioxo-3-oxa-5,12,15-triazanonadec-17-yn-10-yl)amino)-4-methyl-1-oxopentan-2-yl)carbamate (I39)**

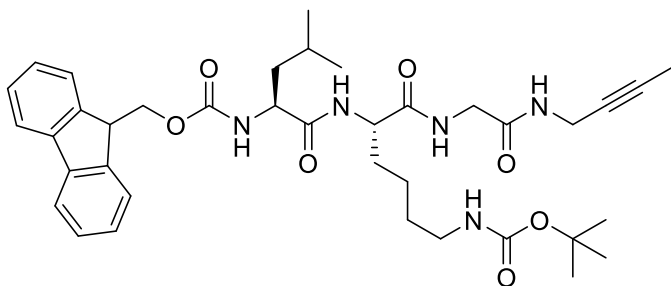

According to General Procedure D, amine hydrochloride **I34** was obtained *in situ* from *N*-Boc-protected peptide **I30** (0.23 g, 1.02 mmol) and was directly used in the following reaction: According to General Procedure E, tetrapeptide **I39** (0.76 g, apparent quantitative) was obtained from dipeptide **I28** (0.60 g, 1.03 mmol) and amine hydrochloride **I34**.

Characteristic analytical data:  $^1\text{H NMR}$  (400 MHz, DMSO- $d_6$ ):  $\delta$  = 8.14 (s, 2H), 7.93 (d,  $J$  = 7.4 Hz, 1H), 7.89 (d,  $J$  = 7.6 Hz, 2H), 7.71 (t,  $J$  = 6.9 Hz, 2H), 7.50 (d,  $J$  = 8.5 Hz, 1H), 7.41 (t,  $J$  = 7.4 Hz, 2H), 7.32 (t,  $J$  = 7.5 Hz, 2H), 6.71 (t,  $J$  = 6.9 Hz, 1H), 4.36 – 4.19 (m, 4H), 4.10 – 4.00 (m, 1H), 3.81 (dt,  $J$  = 5.3, 2.6 Hz, 2H), 3.75 – 3.58 (m, 2H), 2.86 (d,  $J$  = 7.2 Hz, 2H), 1.75 (q,  $J$  = 2.4 Hz, 3H), 1.65 – 1.58 (m, 2H), 1.51 – 1.35 (m, 3H), 1.34 (s, 9H), 1.32 – 1.17 (m, 4H), 0.86 ppm (dd,  $J$  = 13.2, 6.5 Hz, 6H);  $^{13}\text{C NMR}$  (151 MHz, DMSO- $d_6$ ):  $\delta$  = 172.4, 171.9, 168.4, 155.9, 155.6,

142.6, 139.4, 137.4, 128.9, 127.3, 121.4, 120.0, 109.8, 78.0, 77.3, 76.2, 65.5, 52.6, 52.2, 46.7, 43.7, 41.8, 40.5, 39.2, 31.8, 29.2, 28.7, 28.3, 24.0, 23.3, 23.1, 22.5, 21.7, 3.0 ppm; **HRMS** (ESI):  $m/z$  calculated for  $C_{38}H_{52}N_5O_7$  [ $M+H$ ]<sup>+</sup>: 690.3861, found: 690.3833.

**(9H-Fluoren-9-yl)methyl-((S)-1-(((S)-6-((tert-butoxycarbonyl)amino)-1-((2-((1-ethynylcyclopropyl)amino)-2-oxoethyl)amino)-1-oxohexan-2-yl)amino)-4-methyl-1-oxopentan-2-yl)carbamate (I40)**

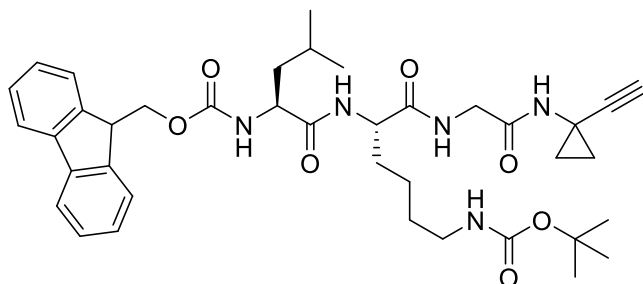

A solution of *N*-Boc-protected peptide **I31** (1.0 equiv., 0.25 g, 1.04 mmol) in commercially sourced formic acid (0.12 M) was stirred under an atmosphere of  $N_2$  gas overnight (16 h). The reaction was concentrated under reduced pressure (30 °C) and the crude residue was redissolved in tetrahydrofuran/water (3:1 v/v, 0.13 M). The solution was

basified with AmberLite™ HPR4800 OH (23-27 mesh) to pH 8 and filtered to afford amine hydrochloride **I35** which was directly used in the following reaction: According to General Procedure E, tetrapeptide **I40** (0.65 g, 90%) was obtained from dipeptide **I28** (0.61 g, 1.04 mmol) and amine hydrochloride **I35**.

Characteristic analytical data: **<sup>1</sup>H NMR** (400 MHz, DMSO- $d_6$ ):  $\delta$  = 8.35 (s, 1H), 8.11 (t,  $J$  = 5.8 Hz, 1H), 7.96 (d,  $J$  = 7.5 Hz, 1H), 7.89 (d,  $J$  = 7.6 Hz, 2H), 7.77 – 7.68 (m, 2H), 7.52 (d,  $J$  = 8.3 Hz, 1H), 7.41 (t,  $J$  = 7.4 Hz, 2H), 7.32 (t,  $J$  = 7.4 Hz, 2H), 6.71 (d,  $J$  = 5.8 Hz, 1H), 4.36 – 4.14 (m, 4H), 4.10 – 3.98 (m, 1H), 3.75 – 3.46 (dd,  $J$  = 5.5 Hz, 2H), 2.93 (s, 1H), 2.86 (q,  $J$  = 6.9 Hz, 2H), 1.72 – 1.56 (m, 2H), 1.55 – 1.40 (m, 3H), 1.38 – 1.12 (m, 4H), 1.34 (s, 9H), 1.06 (dq,  $J$  = 5.2, 2.7 Hz, 2H), 0.96 – 0.77 ppm (m, 8H); **<sup>13</sup>C NMR** (151 MHz, DMSO- $d_6$ ):  $\delta$  = 171.9, 168.8, 167.5, 155.6, 147.1, 143.9, 140.6, 140.5, 127.8, 127.3, 124.0, 120.7, 77.4, 73.2, 68.6, 65.1, 52.9, 52.7, 46.2, 41.8, 40.9, 39.5, 31.8, 28.9, 28.3, 24.0, 23.3, 22.4, 21.8, 21.7(5), 16.8 ppm; **HRMS** (ESI):  $m/z$  calculated for  $C_{39}H_{52}N_5O_7$  [ $M+H$ ]<sup>+</sup>: 702.3861, found: 702.3864.

**(9H-Fluoren-9-yl)methyl-((S)-1-(((S)-6-((tert-butoxycarbonyl)amino)-1-((2-((1-(1-chlorovinyl)cyclopropyl)amino)-2-oxoethyl)amino)-1-oxohexan-2-yl)amino)-4-methyl-1-oxopentan-2-yl)carbamate (I41)**

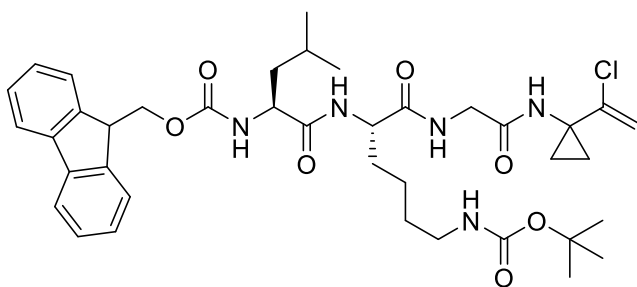

According to General Procedure D, amine hydrochloride **I36** was obtained *in situ* from *N*-Boc-protected peptide **I31** (82.9 mg, 0.348 mmol) and was directly used in the following reaction: According to General Procedure E, tetrapeptide **I41** (244 mg, apparent quantitative, 1:1 mixture of **I41** and **I40** as per <sup>1</sup>H NMR analysis) was obtained from dipeptide **3** (205 mg, 0.35 mmol) and amine

hydrochloride **I36** (mixture of **I36** and **I35**).

Characteristic analytical data for **I41**: **<sup>1</sup>H NMR** (400 MHz, DMSO- $d_6$ ):  $\delta$  = 8.35 (s, 1H), 8.17 (t,  $J$  = 5.7 Hz, 1H), 7.98 (d,  $J$  = 7.5 Hz, 1H), 7.89 (d,  $J$  = 7.6 Hz, 2H), 7.72 (t,  $J$  = 6.7 Hz, 2H), 7.50 (d,  $J$  = 7.2 Hz, 1H), 7.41 (t,  $J$  = 7.5 Hz, 2H), 7.36 – 7.28 (m, 2H), 6.71 (s, 1H), 5.43 (d,  $J$  = 1.8 Hz, 1H), 5.22 (d,  $J$  = 1.8 Hz, 1H), 4.36 – 4.13 (m, 4H), 4.11 – 4.00 (m, 1H), 3.70 – 3.55 (m, 2H), 2.86 (d,  $J$  = 7.7 Hz, 2H), 1.70 – 1.56 (m, 2H), 1.55 – 1.40 (m, 3H), 1.40 – 1.20 (m, 4H), 1.34 (s, 9H), 1.07 (d,  $J$  = 6.6 Hz, 2H), 0.92 (d,  $J$  = 6.6 Hz, 2H), 0.89 – 0.81 ppm (m, 6H); **<sup>13</sup>C NMR** (151 MHz, DMSO- $d_6$ ):  $\delta$  = 170.8, 170.4, 155.9, 155.5, 144.0, 143.7, 140.7, 139.4, 128.9, 127.3, 125.3, 120.1, 112.0, 77.3, 65.5, 53.0, 52.2, 46.7, 41.9, 40.6, 39.2, 36.0, 31.7, 29.2, 28.3, 24.1, 23.1, 22.6, 21.4, 16.8 ppm; **HRMS** (ESI):  $m/z$  calculated for  $C_{39}H_{53}ClN_5O_7$  (**I41**) [ $M+H$ ]<sup>+</sup>: 738.3628, found: 738.3646;  $m/z$  calculated for  $C_{39}H_{53}N_5O_7$  (**I40**) [ $M+H$ ]<sup>+</sup>: 702.3861, found: 702.3887.

**(9H-Fluoren-9-yl)methyl-((S)-1-(((S)-2,2-dimethyl-4,11,14-trioxo-18-phenyl-3-oxa-5,12,15-triazaoctadec-17-yn-10-yl)amino)-4-methyl-1-oxopentan-2-yl)carbamate (I42)**

According to General Procedure D, alkyne hydrochloride salt **I37** was obtained *in situ* from *N*-

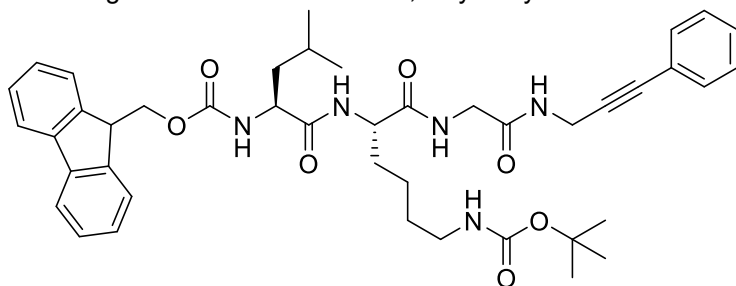

Boc-protected peptide **I32** (0.25 g, 0.86 mmol) and was directly used in the following reaction: According to General Procedure E, tetrapeptide **I42** (0.61 g, 89%) was obtained from dipeptide **I28** (0.50 g, 0.86 mmol) and amine hydrochloride **I37**.

Characteristic analytical data:  $^1\text{H}$

**NMR** (400 MHz, DMSO- $d_6$ ):  $\delta$  = 8.34 (t,  $J$  = 5.5 Hz, 1H), 8.23 – 8.12 (m, 1H), 7.94 (d,  $J$  = 7.7 Hz, 1H), 7.88 (d,  $J$  = 7.5 Hz, 2H), 7.71 (t,  $J$  = 6.8 Hz, 2H), 7.50 (d,  $J$  = 8.7 Hz, 1H), 7.45 – 7.27 (m, 9H), 6.71 (s, 1H), 4.34 – 4.19 (m, 4H), 4.13 (dd,  $J$  = 5.5, 1.9 Hz, 2H), 4.09 – 3.98 (m, 1H), 3.72 (t,  $J$  = 6.8 Hz, 2H), 2.86 (d,  $J$  = 7.6 Hz, 2H), 1.64 – 1.56 (m, 2H), 1.52 – 1.39 (m, 3H), 1.39 – 1.20 (m, 4H), 1.34 (s, 9H), 0.91 – 0.79 ppm (m, 6H);  $^{13}\text{C}$  **NMR** (151 MHz, DMSO- $d_6$ ):  $\delta$  = 172.5, 171.9, 168.6, 156.0, 155.6, 144.0, 143.7, 140.7, 131.4, 128.7, 128.6, 127.7, 127.1, 125.3, 122.3, 120.1, 86.9, 81.6, 77.4, 65.5, 53.1, 52.7, 46.7, 41.9, 40.6, 39.2, 31.6, 29.2, 28.7, 28.3, 24.2, 23.1, 22.5, 21.4 ppm; **HRMS** (ESI):  $m/z$  calculated for  $\text{C}_{43}\text{H}_{54}\text{N}_5\text{O}_7$  [ $M+\text{H}$ ] $^+$ : 752.4018, found: 752.3991.

**tert-Butyl-((S)-5-(((S)-2-acetamido-4-methylpentanamido)-6-oxo-6-((2-oxo-2-(prop-2-yn-1-ylamino)ethyl)amino)hexyl)carbamate (25d)**

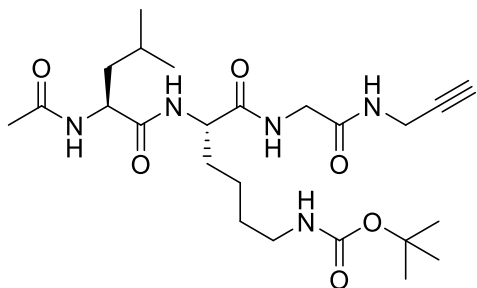

According to General Procedure F, *N*-acetyl tetrapeptide **25d** (20.3 mg, 8%) was obtained from *N*-Fmoc tetrapeptide **I38** (360 mg, 0.53 mmol) and commercially sourced acetic anhydride (53  $\mu\text{L}$ , 0.56 mmol), following flash column chromatography (Biotage® Sfär Silica D Duo 5 g; 18 mL/min; 100% $_{\text{v/v}}$  cyclohexane (2 CV), linear gradient (30 CV): 0% $_{\text{v/v}}$   $\rightarrow$  100% $_{\text{v/v}}$  acetone in cyclohexane, 100% $_{\text{v/v}}$  acetone (2 CV)), and reversed-phase HPLC (Avantor® ACE® 10 AQ 250  $\times$  21.2 mm; 20 mL/min, linear gradient (30 min): 2% $_{\text{v/v}}$   $\rightarrow$  98% $_{\text{v/v}}$  acetonitrile in water (each containing 0.1% $_{\text{v/v}}$  formic acid);  $t_{\text{R}}$  = 15.4 min).

White amorphous solid;  $^1\text{H}$  **NMR** (600 MHz, DMSO- $d_6$ ):  $\delta$  = 8.19 (t,  $J$  = 5.6 Hz, 1H), 8.10 (t,  $J$  = 5.9 Hz, 1H), 7.99 (d,  $J$  = 8.0 Hz, 1H), 7.94 (d,  $J$  = 7.5 Hz, 1H), 6.74 (t,  $J$  = 5.7 Hz, 1H), 4.27 (td,  $J$  = 8.3, 6.1 Hz, 1H), 4.15 (td,  $J$  = 7.8, 5.1 Hz, 1H), 3.86 (td,  $J$  = 5.1, 2.4 Hz, 2H), 3.67 (dd,  $J$  = 21.0, 5.8 Hz, 2H), 3.10 (t,  $J$  = 2.5 Hz, 1H), 2.87 (q,  $J$  = 6.7 Hz, 2H), 1.84 (s, 3H), 1.65 (ddt,  $J$  = 14.4, 10.2, 5.5 Hz, 1H), 1.59 (dq,  $J$  = 13.4, 6.7 Hz, 1H), 1.52 (dtd,  $J$  = 13.6, 9.4, 5.0 Hz, 1H), 1.43 (ddd,  $J$  = 9.1, 6.1, 2.3 Hz, 2H), 1.37 (s, 9H), 1.35 – 1.31 (m, 2H), 1.26 – 1.15 (m, 2H), 0.86 ppm (dd,  $J$  = 24.6, 6.6 Hz, 6H);  $^{13}\text{C}$  **NMR** (176 MHz, DMSO- $d_6$ ):  $\delta$  = 172.4, 171.8, 169.4, 168.5, 155.5, 80.9, 77.3, 73.0, 52.7, 51.0, 41.8, 40.5, 39.5, 31.3, 29.2, 28.3, 27.9, 24.1, 23.1, 22.6, 22.5, 21.6 ppm; **IR** (solid):  $\tilde{\nu}$  = 3289, 3078, 2957, 2934, 2870, 1632, 1532, 1460met, 1440, 1391, 1367, 1277, 1250, 1171, 1097, 1040, 1016  $\text{cm}^{-1}$ ; **HRMS** (ESI):  $m/z$  calculated for  $\text{C}_{24}\text{H}_{42}\text{N}_5\text{O}_6$  [ $M+\text{H}$ ] $^+$ : 496.3130, found: 496.3123.

**tert-Butyl-((S)-5-((S)-2-acetamido-4-methylpentanamido)-6-((2-(but-2-yn-1-ylamino)-2-oxoethyl)amino)-6-oxohexyl)carbamate (25e)**

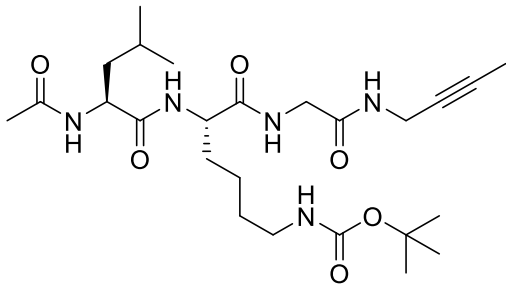

According to General Procedure F, *N*-acetyl tetrapeptide **25e** (5.8 mg, 1%) was obtained from *N*-Fmoc tetrapeptide **I39** (759 mg, 1.01 mmol) and commercially sourced acetic anhydride (0.11 mL, 1.10 mmol), following flash column chromatography (Biotage® Sfär Silica D Duo 10 g; 40 mL/min; 100%<sub>v/v</sub> cyclohexane (2 CV), linear gradient (8 CV): 0%<sub>v/v</sub> → 30%<sub>v/v</sub> acetone in cyclohexane, linear gradient (30 CV): 30%<sub>v/v</sub> → 100%<sub>v/v</sub> acetone in cyclohexane, 100%<sub>v/v</sub> acetone (10 CV)), and

reversed-phase HPLC (Avantor® ACE® 10 AQ 250 × 21.2 mm; 20 mL/min, linear gradient (45 min): 2%<sub>v/v</sub> → 98%<sub>v/v</sub> acetonitrile in water (each containing 0.1%<sub>v/v</sub> formic acid); *t*<sub>R</sub> = 20.4 min).

White amorphous solid; <sup>1</sup>H NMR (400 MHz, DMSO-*d*<sub>6</sub>): δ = 8.11 (t, *J* = 5.5 Hz, 1H), 8.07 (t, *J* = 5.9 Hz, 1H), 8.00 (d, *J* = 7.9 Hz, 1H), 7.94 (d, *J* = 7.6 Hz, 1H), 6.75 (t, *J* = 5.6 Hz, 1H), 4.32 – 4.22 (m, 1H), 4.15 (q, *J* = 7.6 Hz, 1H), 3.82 (dq, *J* = 5.3, 2.8 Hz, 2H), 3.66 (qd, *J* = 16.6, 5.6 Hz, 2H), 2.90 – 2.82 (m, 2H), 1.84 (s, 3H), 1.76 (t, *J* = 2.4 Hz, 3H), 1.70 – 1.55 (m, 2H), 1.54 – 1.46 (m, 1H), 1.45 – 1.39 (m, 2H), 1.37 (s, 9H), 1.35 – 1.28 (m, 2H), 1.28 – 1.16 (m, 2H), 0.92 – 0.81 ppm (m, 6H); <sup>13</sup>C NMR (151 MHz, DMSO-*d*<sub>6</sub>): δ = 172.4, 171.8, 169.5, 168.4, 155.6, 78.0, 77.4, 76.3, 52.7, 51.1, 41.8, 40.5, 39.5, 31.4, 29.2, 28.3, 28.2, 24.2, 23.1, 22.6, 22.5, 21.6, 3.1 ppm; IR (film):  $\tilde{\nu}$  = 3281 (br), 3081, 2956, 2933, 2869, 2361, 2252, 1779, 1689, 1628, 1538 cm<sup>-1</sup>; HRMS (ESI): *m/z* calculated for C<sub>25</sub>H<sub>44</sub>N<sub>5</sub>O<sub>6</sub> [*M*+H]<sup>+</sup>: 510.3286, found: 510.3291.

**tert-Butyl-((S)-5-((S)-2-acetamido-4-methylpentanamido)-6-((1-ethynylcyclopropyl)amino)-2-oxoethyl)amino)-6-oxohexyl)carbamate (25f)**

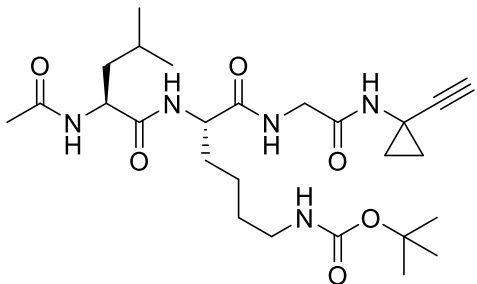

According to General Procedure F, *N*-acetyl tetrapeptide **25f** (56.6 mg, 13%) was obtained from *N*-Fmoc tetrapeptide **I40** (610 mg, 0.87 mmol) and commercially sourced acetic anhydride (87  $\mu$ L, 0.92 mmol), following flash column chromatography (Biotage® Sfär Silica D Duo 10 g; 40 mL/min; 100%<sub>v/v</sub> cyclohexane (6 CV), linear gradient (8 CV): 0%<sub>v/v</sub> → 30%<sub>v/v</sub> acetone in cyclohexane, linear gradient (30 CV): 30%<sub>v/v</sub> → 100%<sub>v/v</sub> acetone in cyclohexane, 100%<sub>v/v</sub> acetone (10 CV)), and reversed-phase HPLC

(Avantor® ACE® 10 AQ 250 × 21.2 mm; 20 mL/min, linear gradient (45 min): 2%<sub>v/v</sub> → 98%<sub>v/v</sub> acetonitrile in water (each containing 0.1%<sub>v/v</sub> formic acid); *t*<sub>R</sub> = 20.1 min).

White amorphous solid; <sup>1</sup>H NMR (400 MHz, DMSO-*d*<sub>6</sub>): δ = 8.30 (s, 1H), 8.05 (t, *J* = 5.8 Hz, 1H), 7.98 (t, *J* = 8.1 Hz, 2H), 6.75 (t, *J* = 5.7 Hz, 1H), 4.27 (qd, *J* = 7.3, 4.3 Hz, 1H), 4.11 (td, *J* = 8.0, 5.2 Hz, 1H), 3.69 – 3.50 (m, 2H), 2.94 (s, 1H), 2.87 (q, *J* = 6.6 Hz, 2H), 1.84 (s, 3H), 1.68 – 1.55 (m, 2H), 1.54 – 1.46 (m, 1H), 1.45 – 1.40 (m, 2H), 1.36 (s, 9H), 1.35 – 1.29 (m, 2H), 1.28 – 1.14 (m, 2H), 1.07 (m, 2H), 1.08 – 0.83 (m, 2H), 0.86 ppm (dd, *J* = 16.9, 6.5 Hz, 6H); <sup>13</sup>C NMR (151 MHz, DMSO-*d*<sub>6</sub>): δ = 172.5, 171.8, 169.5, 169.0, 155.6, 86.2, 77.4, 68.6, 52.8, 51.1, 41.9, 40.5, 39.5, 31.3, 29.2, 28.3, 24.2, 23.1, 22.7, 22.5, 21.8, 21.6, 16.8 ppm (2C); IR (film):  $\tilde{\nu}$  = 3307 (br), 2958, 2118, 1645, 1535, 1452, 1367, 1287, 1251, 1171 cm<sup>-1</sup>; HRMS (ESI): *m/z* calculated for C<sub>26</sub>H<sub>44</sub>N<sub>5</sub>O<sub>6</sub> [*M*+H]<sup>+</sup>: 522.3286, found: 522.3288.

**tert-Butyl-((S)-5-((S)-2-acetamido-4-methylpentanamido)-6-((2-((1-(1-chlorovinyl)cyclopropyl)amino)-2-oxoethyl)amino)-6-oxohexyl)carbamate (25c)**

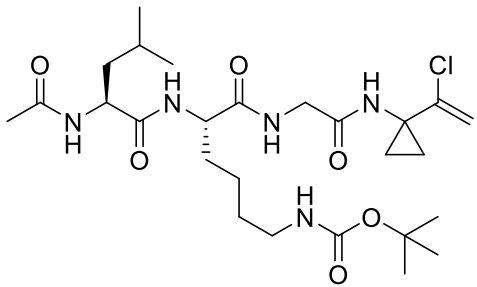

According to General Procedure F, *N*-acetyl tetrapeptide **25c** (10.03 mg, ~ 5%) was obtained from *N*-Fmoc tetrapeptide **I41** (244 mg, 1:1 mixture of **I41** and **I40** as per <sup>1</sup>H NMR analysis) and commercially sourced acetic anhydride (34.5 μL, 0.37 mmol), following flash column chromatography (Biotage® Sfär Silica D Duo 10 g; 40 mL/min; 100%<sub>v/v</sub> cyclohexane (2 CV), linear gradient (8 CV): 0%<sub>v/v</sub> → 30%<sub>v/v</sub> acetone in cyclohexane, linear gradient (30 CV): 30%<sub>v/v</sub> → 100%<sub>v/v</sub> acetone in cyclohexane, 100%<sub>v/v</sub> acetone (10

CV)), and reversed-phase HPLC (Avantor® ACE® 10 AQ 250 × 21.2 mm; 20 mL/min, linear gradient (30 min): 2%<sub>v/v</sub> → 98%<sub>v/v</sub> acetonitrile in water (each containing 0.1%<sub>v/v</sub> formic acid); t<sub>R</sub> = 17.4 min).

White amorphous solid ; <sup>1</sup>H NMR (600 MHz, DMSO-*d*<sub>6</sub>): δ = 8.32 (s, 1H), 8.12 (t, *J* = 5.8 Hz, 1H), 7.99 (t, *J* = 8.3 Hz, 2H), 6.74 (t, *J* = 5.7 Hz, 1H), 5.43 (d, *J* = 1.8 Hz, 1H), 5.23 (d, *J* = 1.8 Hz, 1H), 4.30 – 4.23 (m, 1H), 4.11 (q, *J* = 6.3 Hz, 1H), 3.69 – 3.55 (m, 2H), 2.87 (q, *J* = 6.7 Hz, 2H), 1.84 (s, 3H), 1.68 – 1.61 (m, 1H), 1.60 – 1.55 (m, 1H), 1.54 – 1.47 (m, 1H), 1.42 (m, 2H), 1.37 (s, 9H), 1.36 – 1.31 (m, 2H), 1.29 – 1.16 (m, 4H), 0.93 (m, 2H), 0.86 ppm (dd, *J* = 24.8, 6.6 Hz, 6H); <sup>13</sup>C NMR (151 MHz, DMSO-*d*<sub>6</sub>): δ = 172.5, 172.0, 169.4, 169.1, 155.5, 141.2, 112.2, 77.3, 52.8, 51.0, 42.2, 40.5, 39.5, 35.9, 31.2, 29.2, 28.3, 24.1, 23.0, 22.7, 22.4, 21.6, 14.4, 14.2 ppm; IR (film): ν̄ = 3281, 3067, 2954, 2936, 2868, 2247, 1685, 1630, 1532 cm<sup>-1</sup>; HRMS (ESI): *m/z* calculated for C<sub>26</sub>H<sub>45</sub>ClN<sub>5</sub>O<sub>6</sub> [*M*+H]<sup>+</sup>: 558.3053, found: 558.3064.

**tert-Butyl-((S)-5-((S)-2-acetamido-4-methylpentanamido)-6-oxo-6-((2-oxo-2-((3-phenylprop-2-yn-1-yl)amino)ethyl)amino)hexyl)carbamate (25g)**

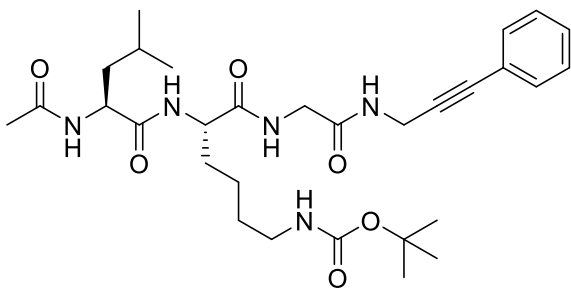

According to General Procedure F, *N*-acetyl tetrapeptide **25g** (93.0 mg, 21%) was obtained from *N*-Fmoc tetrapeptide **I42** (590 mg, 0.78 mmol) and commercially sourced acetic anhydride (80 μL, 0.85 mmol), following flash column chromatography (Biotage® Sfär Silica D Duo 10 g; 40 mL/min; 100%<sub>v/v</sub> cyclohexane (2 CV), linear gradient (8 CV): 0%<sub>v/v</sub> → 30%<sub>v/v</sub> acetone in cyclohexane, linear gradient (30 CV): 30%<sub>v/v</sub> → 100%<sub>v/v</sub> acetone in

cyclohexane, 100%<sub>v/v</sub> acetone (10 CV)), and reversed-phase HPLC (Avantor® ACE® 10 AQ 250 × 21.2 mm; 20 mL/min, linear gradient (45 min): 2%<sub>v/v</sub> → 98%<sub>v/v</sub> acetonitrile in water (each containing 0.1%<sub>v/v</sub> formic acid); t<sub>R</sub> = 24.4 min).

White amorphous solid ; <sup>1</sup>H NMR (400 MHz, DMSO-*d*<sub>6</sub>): δ = 8.31 (t, *J* = 5.5 Hz, 1H), 8.13 (t, *J* = 5.9 Hz, 1H), 8.00 (d, *J* = 7.9 Hz, 1H), 7.96 (d, *J* = 7.6 Hz, 1H), 7.45 – 7.31 (m, 5H), 6.75 (t, *J* = 5.6 Hz, 1H), 4.28 (td, *J* = 8.3, 6.3 Hz, 1H), 4.18 (dd, *J* = 8.0, 5.4 Hz, 1H), 4.14 (dd, *J* = 5.5, 3.2 Hz, 2H), 3.71 (dd, *J* = 11.7, 5.8 Hz, 2H), 2.87 (q, *J* = 6.6 Hz, 2H), 1.84 (s, 3H), 1.71 – 1.63 (m, 1H), 1.62 – 1.56 (m, 1H), 1.55 – 1.47 (m, 1H), 1.46 – 1.39 (m, 2H), 1.36 (s, 9H), 1.35 – 1.29 (m, 2H), 1.28 – 1.16 (m, 2H), 0.84 ppm (dd, *J* = 14.1, 6.6 Hz, 6H); <sup>13</sup>C NMR (101 MHz, DMSO-*d*<sub>6</sub>): δ = 172.4, 171.9, 169.4, 168.6, 155.6, 131.4, 128.7, 128.6, 122.2, 86.9, 81.6, 77.3, 52.7, 51.1, 41.9, 40.5, 39.5, 31.4, 29.2, 28.6, 28.3, 24.2, 23.0, 22.6, 22.5, 21.6 ppm; IR (film): ν̄ = 3287 (br), 3080, 2971, 2883, 2117, 1683, 1634, 1451, 1368, 1287, 1252, 1172 cm<sup>-1</sup>; HRMS (ESI): *m/z* calculated for C<sub>30</sub>H<sub>46</sub>N<sub>5</sub>O<sub>6</sub> [*M*+H]<sup>+</sup>: 572.3443, found: 572.3440.

**tert-Butyl-((S)-5-((S)-4-methyl-2-(2,2,2-trifluoroacetamido)pentanamido)-6-oxo-6-((2-oxo-2-(prop-2-yn-1-ylamino)ethyl)amino)hexyl)carbamate (25a)**

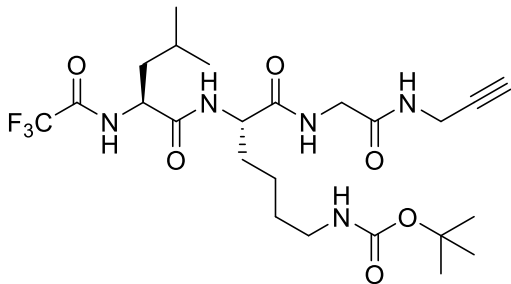

According to General Procedure F, *N*-acetyl tetrapeptide **25a** (28.3 mg, 11%) was obtained from *N*-Fmoc tetrapeptide **I38** (300 mg, 0.44 mmol) and commercially sourced trifluoroacetic anhydride (65  $\mu$ L, 0.47 mmol), following flash column chromatography (Biotage® Sfär Silica D Duo 25 g; 80 mL/min; 100%<sub>v/v</sub> cyclohexane (2 CV), linear gradient (8 CV): 0%<sub>v/v</sub>  $\rightarrow$  30%<sub>v/v</sub> acetone in cyclohexane, linear gradient (30 CV): 30%<sub>v/v</sub>  $\rightarrow$  100%<sub>v/v</sub> acetone in cyclohexane, 100%<sub>v/v</sub> acetone

(2 CV)), and reversed-phase HPLC (Avantor® ACE® 10 AQ 250  $\times$  21.2 mm; 20 mL/min, linear gradient (45 min): 2%<sub>v/v</sub>  $\rightarrow$  98%<sub>v/v</sub> acetonitrile in water (each containing 0.1%<sub>v/v</sub> formic acid);  $t_R$  = 22.9 min).

White amorphous solid ;  $^1\text{H NMR}$  (400 MHz, DMSO- $d_6$ ):  $\delta$  = 9.43 (d,  $J$  = 8.2 Hz, 1H), 8.18 – 8.08 (m, 2H), 8.07 (t,  $J$  = 5.8 Hz, 1H), 6.63 (t,  $J$  = 5.7 Hz, 1H), 4.42 (ddd,  $J$  = 10.6, 8.1, 4.2 Hz, 1H), 4.20 (td,  $J$  = 8.0, 5.6 Hz, 1H), 3.87 (dt,  $J$  = 5.3, 2.5 Hz, 2H), 3.68 (d,  $J$  = 5.8 Hz, 2H), 3.04 (t,  $J$  = 2.5 Hz, 1H), 2.88 (q,  $J$  = 6.6 Hz, 2H), 1.71 – 1.61 (m, 2H), 1.60 – 1.47 (m, 3H), 1.37 (s, 9H), 1.36 – 1.32 (m, 2H), 1.31 – 1.17 (m, 2H), 0.94 – 0.79 ppm (m, 6H);  $^{13}\text{C NMR}$  (101 MHz, DMSO- $d_6$ ):  $\delta$  = 171.8, 170.6, 168.5, 156.3 (q,  $J$  = 36.3 Hz), 155.6, 115.9 (t,  $J$  = 288.0 Hz), 81.0, 77.4, 73.1, 52.9, 51.7, 41.8, 39.2 (2C), 31.5, 29.2, 28.3, 27.9, 24.3, 23.0, 22.6, 21.1 ppm;  $^{19}\text{F NMR}$  (376 MHz, DMSO- $d_6$ ):  $\delta$  = -73.9 ppm (s, 3F); **IR** (film):  $\tilde{\nu}$  = 3288 (br), 2347, 2253, 1673 (br), 1542, 1368, 1180, 1167  $\text{cm}^{-1}$ ; **HRMS** (ESI):  $m/z$  calculated for  $\text{C}_{24}\text{H}_{39}\text{F}_3\text{N}_5\text{O}_6$  [ $M+H$ ] $^+$ : 550.2847, found: 550.2847.

**(S)-5-((S)-2-Acetamido-4-methylpentanamido)-6-oxo-6-((2-oxo-2-(prop-2-yn-1-ylamino)ethyl)amino)hexan-1-aminium chloride (25)**

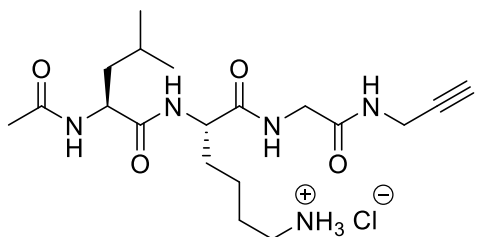

According to General Procedure G, tetrapeptide **25** (6.3 mg, 60%) was obtained from *N*-Boc tetrapeptide **25d** (12.2 mg, 0.025 mmol).

White amorphous solid ;  $^1\text{H NMR}$  (400 MHz, DMSO- $d_6$ ):  $\delta$  = 8.26 (t,  $J$  = 5.5 Hz, 1H), 8.09 (t,  $J$  = 5.8 Hz, 1H), 8.01 (t,  $J$  = 7.3 Hz, 2H), 7.67 (s, 2H), 4.30 – 4.17 (m, 2H), 3.86 (ddd,  $J$  = 5.7, 2.6, 1.4 Hz, 2H), 3.69 (dd,  $J$  = 5.6, 1.5 Hz, 2H), 3.11 (t,  $J$  = 2.5 Hz, 1H), 2.75 (d,  $J$  = 8.4 Hz, 2H), 1.84 (s, 3H), 1.68 (dt,  $J$  = 13.8, 6.3 Hz, 1H), 1.59 (dt,  $J$  = 13.5, 6.8 Hz, 1H), 1.55 – 1.46 (m, 3H), 1.43 (dd,  $J$  = 8.3, 6.3 Hz, 2H), 1.37 – 1.26 (m, 2H), 0.86 ppm (dd,  $J$  = 16.4, 6.6 Hz, 6H);  $^{13}\text{C NMR}$  (151 MHz, DMSO- $d_6$ ):  $\delta$  = 172.5, 171.7, 169.5, 168.5, 80.9, 73.1, 52.3, 51.1, 41.7, 40.4, 38.7, 31.0, 27.9, 26.5, 24.2, 23.1, 22.5, 22.1, 21.5 ppm; **IR** (film):  $\tilde{\nu}$  = 3010, 2898, 2855, 2265, 1734, 1636, 1541, 1437, 1291  $\text{cm}^{-1}$ ; **HRMS** (ESI):  $m/z$  calculated for  $\text{C}_{19}\text{H}_{34}\text{N}_5\text{O}_4$  [ $M-Cl$ ] $^+$ : 396.2605, found: 396.2601.

**(S)-5-((S)-2-Acetamido-4-methylpentanamido)-6-((2-(but-2-yn-1-ylamino)-2-oxoethyl)amino)-6-oxohexan-1-aminium chloride (25j)**

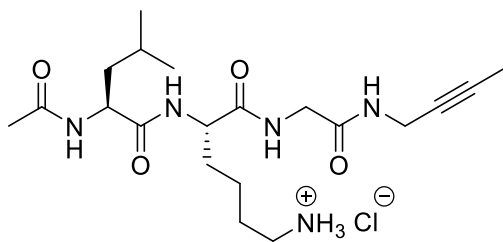

According to General Procedure G, tetrapeptide **25j** (2.0 mg, 50%) was obtained from *N*-Boc tetrapeptide **25e** (3.9 mg, 0.008 mmol).

White amorphous solid ;  $^1\text{H NMR}$  (400 MHz, DMSO- $d_6$ ):  $\delta$  = 8.35 (s, 2H), 8.18 (t,  $J$  = 5.5 Hz, 1H), 8.10 (t,  $J$  = 5.9 Hz, 1H), 8.04 (dd,  $J$  = 10.4, 7.8 Hz, 2H), 4.30 – 4.23 (m, 1H), 4.22 – 4.16 (m, 1H), 3.82 (p,  $J$  = 2.5 Hz, 2H), 3.73 – 3.61 (m, 2H), 2.71 (t,  $J$  = 7.4 Hz,

2H), 1.84 (s, 3H), 1.76 (t,  $J = 2.5$  Hz, 3H), 1.72 – 1.64 (m, 1H), 1.63 – 1.57 (m, 1H), 1.56 – 1.53 (m, 1H), 1.49 (m, 2H), 1.43 (t,  $J = 7.3$  Hz, 2H), 1.34 – 1.21 (m, 2H), 0.86 ppm (dd,  $J = 16.5, 6.6$  Hz, 6H);  $^{13}\text{C NMR}$  (151 MHz, DMSO- $d_6$ ):  $\delta = 172.4, 171.7, 169.5, 168.3, 78.0, 76.2, 52.3, 51.2, 41.7, 40.5, 38.8, 31.1, 28.2, 27.0, 24.2, 23.1, 22.5, 22.1, 21.5, 3.0$  ppm; **IR** (film):  $\tilde{\nu} = 3296$  (br), 2957, 2925, 2856, 2361, 2270, 1652, 1547, 1469, 1237  $\text{cm}^{-1}$ ; **HRMS** (ESI):  $m/z$  calculated for  $\text{C}_{20}\text{H}_{36}\text{N}_5\text{O}_4$  [ $M-\text{Cl}$ ] $^+$ : 410.2762, found: 410.2760.

**(S)-5-((S)-2-Acetamido-4-methylpentanamido)-6-((2-((1-ethynylcyclopropyl)amino)-2-oxoethyl)amino)-6-oxohexan-1-aminium chloride (25h)**

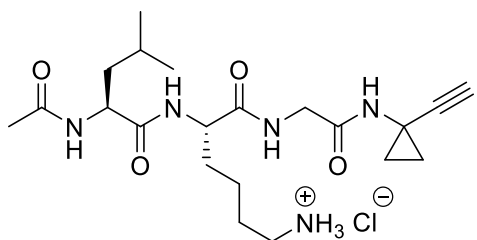

According to General Procedure G, tetrapeptide **25h** (7.6 mg, 77%) was obtained from *N*-Boc tetrapeptide **25f** (11.5 mg, 0.022 mmol).

White amorphous solid;  $^1\text{H NMR}$  (400 MHz, DMSO- $d_6$ ):  $\delta = 8.39$  (s, 1H), 8.10 – 8.01 (m, 3H), 7.80 (s, 2H), 4.31 – 4.21 (m, 1H), 4.18 (td,  $J = 8.3, 5.2$  Hz, 1H), 3.69 – 3.53 (m, 2H), 2.95 (s, 1H), 2.74 (s, 2H), 1.84 (s, 3H), 1.74 – 1.64 (m, 1H), 1.63 – 1.55 (m, 2H), 1.53 (m, 2H),

1.44 (t,  $J = 7.3$  Hz, 2H), 1.37 – 1.25 (m, 2H), 1.10 – 1.05 (m, 2H), 0.96 – 0.91 (m, 2H), 0.87 ppm (dd,  $J = 16.7, 6.5$  Hz, 6H);  $^{13}\text{C NMR}$  (151 MHz, DMSO- $d_6$ ):  $\delta = 172.5, 171.6, 169.5, 168.9, 86.2, 68.6, 52.4, 51.1, 41.8, 40.5, 38.6, 31.0, 26.5, 24.1, 23.1, 22.5, 22.1, 21.8, 21.5, 16.7$  ppm (2C); **IR** (film):  $\tilde{\nu} = 2928, 2264, 1733, 1644, 1548, 1439, 1292, 1109$   $\text{cm}^{-1}$ ; **HRMS** (ESI):  $m/z$  calculated for  $\text{C}_{21}\text{H}_{36}\text{N}_5\text{O}_4$  [ $M-\text{Cl}$ ] $^+$ : 422.2762, found: 422.2742.

**(S)-5-((S)-2-Acetamido-4-methylpentanamido)-6-oxo-6-((2-oxo-2-((3-phenylprop-2-yn-1-yl)amino)ethyl)amino)hexan-1-aminium chloride (25i)**

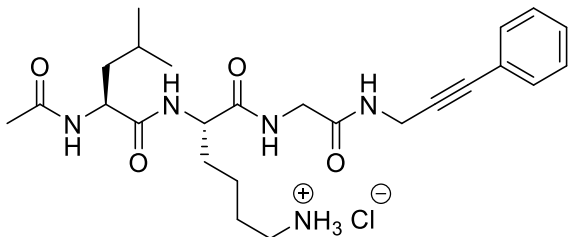

According to General Procedure G, tetrapeptide **25i** (4.1 mg, 89%) was obtained from *N*-Boc-protected tetrapeptide **25g** (5.2 mg, 0.009 mmol).

White amorphous solid;  $^1\text{H NMR}$  (400 MHz, DMSO- $d_6$ ):  $\delta = 8.37$  (t,  $J = 5.5$  Hz, 1H), 8.24 (s, 1H), 8.13 (t,  $J = 5.8$  Hz, 1H), 8.03 (d,  $J = 7.8$  Hz, 2H), 7.45 – 7.33 (m, 5H), 4.25 (dt,  $J =$

14.9, 7.2 Hz, 2H), 4.17 – 4.11 (m, 2H), 3.74 – 3.70 (m, 2H), 2.74 (t,  $J = 7.5$  Hz, 2H), 1.84 (s, 3H), 1.74 – 1.64 (m, 1H), 1.64 – 1.54 (m, 2H), 1.54 – 1.46 (m, 2H), 1.46 – 1.40 (m, 2H), 1.34 – 1.28 (m, 2H), 0.85 ppm (dd,  $J = 14.7, 6.6$  Hz, 6H);  $^{13}\text{C NMR}$  (151 MHz, DMSO- $d_6$ ):  $\delta = 172.5, 171.7, 169.5, 168.5, 131.3, 128.7, 128.6, 122.2, 86.8, 81.6, 52.3, 51.2, 41.8, 40.4, 38.7, 31.1, 28.6, 26.6, 24.2, 23.1, 22.5, 22.1, 21.5$  ppm; **IR** (film):  $\tilde{\nu} = 3270$  (br), 2930, 2864, 2335, 2255, 1638, 1549  $\text{cm}^{-1}$ ; **HRMS** (ESI):  $m/z$  calculated for  $\text{C}_{25}\text{H}_{38}\text{N}_5\text{O}_4$  [ $M-\text{Cl}$ ] $^+$ : 472.2918, found: 472.2916.

**(S)-5-((S)-4-Methyl-2-(2,2,2-trifluoroacetamido)pentanamido)-6-oxo-6-((2-oxo-2-(prop-2-yn-1-ylamino)ethyl)amino)hexan-1-aminium chloride (25k)**

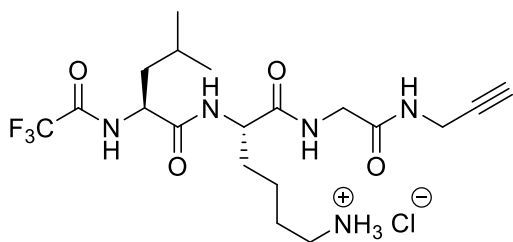

According to General Procedure G, tetrapeptide **25k** (5.5 mg, 73%) was obtained from *N*-Boc tetrapeptide **25a** (8.4 mg, 0.015 mmol).

White amorphous solid;  $^1\text{H NMR}$  (400 MHz, DMSO- $d_6$ ):  $\delta = 9.54$  (d,  $J = 7.9$  Hz, 1H), 8.29 (dd,  $J = 9.5, 6.5$  Hz, 2H), 8.16 (t,  $J = 5.8$  Hz, 1H), 7.64 (s, 3H), 4.46 – 4.35 (m, 1H), 4.25 (q,  $J = 8.0$  Hz, 1H), 3.90 – 3.84 (m, 2H), 3.73 – 3.62 (m, 2H), 3.12 (t,  $J = 2.5$  Hz, 1H), 2.74 (d,  $J = 7.1$  Hz, 2H), 1.73 – 1.60

(m, 2H), 1.60 – 1.46 (m, 5H), 1.35 – 1.27 (m, 2H), 0.87 ppm (dd,  $J = 14.0, 6.3$  Hz, 6H);  $^{13}\text{C NMR}$  (151 MHz, DMSO- $d_6$ ):  $\delta = 171.6, 170.7, 168.5, 156.3$  (d,  $J = 36.9$  Hz), 115.9 (d,  $J = 288.1$  Hz), 81.0, 73.1, 52.5, 51.7, 41.7, 39.2, 38.7, 31.2, 27.9, 26.6, 24.3, 23.0, 22.1, 21.1 ppm;  $^{19}\text{F NMR}$

(376 MHz, DMSO-*d*<sub>6</sub>):  $\delta$  = -73.8 ppm (m, 3F); **IR** (film):  $\tilde{\nu}$  = 3289 (br), 2961 (br), 2253, 1719, 1648, 1541, 1389, 1261, 1215, 1185, 1073 cm<sup>-1</sup>; **HRMS** (ESI): *m/z* calculated for C<sub>19</sub>H<sub>31</sub>F<sub>3</sub>N<sub>5</sub>O<sub>4</sub> [*M-CF*]<sup>+</sup>: 450.2323, found: 450.2325.

**(S)-2-((S)-4-Methyl-2-(2,2,2-trifluoroacetamido)pentanamido)-N-(2-oxo-2-(prop-2-yn-1-ylamino)ethyl)-6-(2,2,2-trifluoroacetamido)hexanamide (25b)**

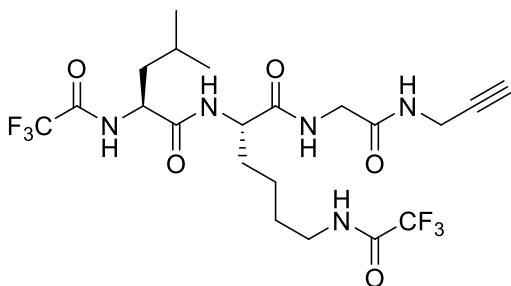

*N*-Boc tetrapeptide **25k** (60 mg, 0.110 mmol) was deprotected according to General Procedure G. Commercially sourced 4-(*N,N*-dimethylamino)pyridine (1.05 equiv.), anhydrous tetrahydrofuran (0.09 M) and commercially sourced trifluoroacetic anhydride (1.05 equiv.) were added, and the reaction stirred under reflux (1 h). After cooling to ambient temperature, the mixture was concentrated under reduced pressure, and the crude residue was redissolved in ethyl acetate. The

mixture was washed with aqueous HCl (1 M), saturated aqueous NaHCO<sub>3</sub> and brine, then dried over anhydrous Na<sub>2</sub>SO<sub>4</sub>, filtered and concentrated under reduced pressure. The residue was purified via flash column chromatography (Biotage® Sfär Silica D Duo 5 g; 18 mL/min; 100%<sub>v/v</sub> cyclohexane (3 CV), linear gradient (15 CV): 0%<sub>v/v</sub> → 100%<sub>v/v</sub> acetone in cyclohexane, 100%<sub>v/v</sub> acetone (3 CV)) and reversed-phase HPLC (Avantor® ACE® 10 AQ 250 × 21.2 mm; 20 mL/min, linear gradient (45 min): 2%<sub>v/v</sub> → 98%<sub>v/v</sub> acetonitrile in water (each containing 0.1%<sub>v/v</sub> formic acid); *t*<sub>R</sub> = 21.0 min), to give the desired peptide **25b** (0.43 mg, 1%).

White amorphous solid; **<sup>1</sup>H NMR** (600 MHz, DMSO-*d*<sub>6</sub>):  $\delta$  = 9.53 (d, *J* = 7.9 Hz, 1H), 9.38 (s, 1H), 8.24 (t, *J* = 5.5 Hz, 2H), 8.18 (t, *J* = 5.8 Hz, 1H), 4.45 – 4.38 (m, 1H), 4.22 (td, *J* = 8.0, 5.3 Hz, 1H), 3.86 (ddd, *J* = 6.1, 3.8, 2.5 Hz, 2H), 3.68 (d, *J* = 5.9 Hz, 2H), 3.15 (q, *J* = 6.6 Hz, 2H), 3.14 – 3.08 (m, 1H), 1.72 – 1.57 (m, 2H), 1.59 – 1.43 (m, 5H), 1.28 (ddd, *J* = 24.2, 16.3, 8.9 Hz, 2H), 0.87 ppm (dd, *J* = 20.2, 6.4 Hz, 6H); **<sup>13</sup>C NMR** (151 MHz, DMSO-*d*<sub>6</sub>):  $\delta$  = 171.7, 170.6, 168.4, 156.2 (d, *J* = 36.4 Hz), 156.1 (d, *J* = 35.8 Hz), 116.0 (d, *J* = 288.3 Hz), 115.9 (d, *J* = 287.7 Hz), 81.0, 73.0, 52.7, 51.7, 41.7, 39.5, 39.0, 31.4, 27.9, 27.8(6), 24.3, 23.0, 22.5, 21.1 ppm; **<sup>19</sup>F NMR** (565 MHz, DMSO-*d*<sub>6</sub>):  $\delta$  = -73.9 (s, 3F), -74.4 ppm (s, 3F); **IR** (film):  $\tilde{\nu}$  = 3293 (br), 3094, 2949, 2126, 1704, 1640, 1548, 1209, 1186, 1158 cm<sup>-1</sup>; **HRMS** (ESI): *m/z* calculated for C<sub>21</sub>H<sub>30</sub>F<sub>6</sub>N<sub>5</sub>O<sub>5</sub> [*M+H*]<sup>+</sup>: 546.2146, found: 546.2141.

***N*-((S)-5-((S)-4-methyl-2-(2,2,2-trifluoroacetamido)pentanamido)-6-oxo-6-((2-oxo-2-(prop-2-yn-1-ylamino)ethyl)amino)hexyl)-1-(5-((3*aS*,4*S*,6*aR*)-2-oxohexahydro-1*H*-thieno[3,4-*d*]imidazol-4-yl)pentanamido)-3,6,9,12-tetraoxapentadecan-15-amide (31, bio-a-25a)**



White solid;  $^1\text{H}$  NMR (400 MHz,  $\text{DMSO}-d_6$ ):  $\delta$  = 1H NMR (400 MHz,  $\text{DMSO}$ )  $\delta$  9.53 (d,  $J$  = 8.0 Hz, 1H), 8.26 – 8.19 (m, 2H), 8.17 (t,  $J$  = 5.8 Hz, 1H), 7.83 (t,  $J$  = 5.6 Hz, 1H), 7.78 (t,  $J$  = 5.6 Hz, 1H), 6.42 (s, 1H), 6.35 (s, 1H), 4.42 (ddd,  $J$  = 10.8, 7.9, 4.1 Hz, 1H), 4.34 – 4.25 (m, 1H), 4.19 (td,  $J$  = 8.2, 5.6 Hz, 1H), 4.12 (ddd,  $J$  = 7.8, 4.4, 1.9 Hz, 1H), 3.86 (dt,  $J$  = 5.1, 2.4 Hz, 2H), 3.68 (d,  $J$  = 5.8 Hz, 2H), 3.58 (t,  $J$  = 6.5 Hz, 2H), 3.54 – 3.42 (m, 8H), 3.38 (t,  $J$  = 5.9 Hz, 2H), 3.18 (q,  $J$  = 5.8 Hz, 2H), 3.12 – 3.06 (m, 2H), 3.00 (q,  $J$  = 6.6 Hz, 2H), 2.81 (dd,  $J$  = 12.4, 5.0 Hz, 1H), 2.57 (d,  $J$  = 12.4 Hz, 1H), 2.29 (t,  $J$  = 6.5 Hz, 2H), 2.06 (t,  $J$  = 7.4 Hz, 2H), 1.70 – 1.40 (m, 9H), 1.40 – 1.21 (m, 6H), 0.87 ppm (dd,  $J$  = 13.6, 6.1 Hz, 6H);  $^{13}\text{C}$  NMR (151 MHz,  $\text{DMSO}-d_6$ ):  $\delta$  = 172.1, 171.7, 170.6, 169.8, 168.5, 162.7, 156.1 (q,  $J$  = 36.4 Hz), 115.9 (q,  $J$  = 288.2 Hz), 81.0, 73.1, 69.7, 69.6(7), 69.6, 69.5, 69.2, 66.9, 61.0, 59.2, 55.4, 52.8, 51.6, 41.7, 39.8, 39.2, 38.4, 38.3, 36.1, 35.1, 31.4, 28.8, 28.2, 28.0, 27.9, 25.3, 24.3, 23.0, 22.6, 21.1 ppm;  $^{19}\text{F}$  NMR (376 MHz,  $\text{DMSO}-d_6$ ):  $\delta$  = -74.4 ppm (s, 3F); IR (film):  $\tilde{\nu}$  = 3290 (br), 3080, 2930, 2870, 2361, 2341, 1650, 1548, 1460, 1350, 1209, 1190, 1156, 668  $\text{cm}^{-1}$ ; HRMS (ESI):  $m/z$  calculated for  $\text{C}_{38}\text{H}_{61}\text{F}_3\text{N}_8\text{O}_{10}\text{SK}$  [ $M+K$ ] $^+$ : 917.3815, found: 917.3855.

***tert*-butyl ((2*S*,23*S*)-20-isobutyl-5,18,21-trioxo-23-((2-oxo-2-(prop-2-yn-1-ylamino)ethyl)carbamoyl)-1-((3*aS*,4*S*,6*aR*)-2-oxohexahydro-1*H*-thieno[3,4-*d*]imidazol-4-yl)-9,12,15-trioxa-6,19,22-triazaheptacosan-27-yl)carbamate (33, bio-b-I38)**

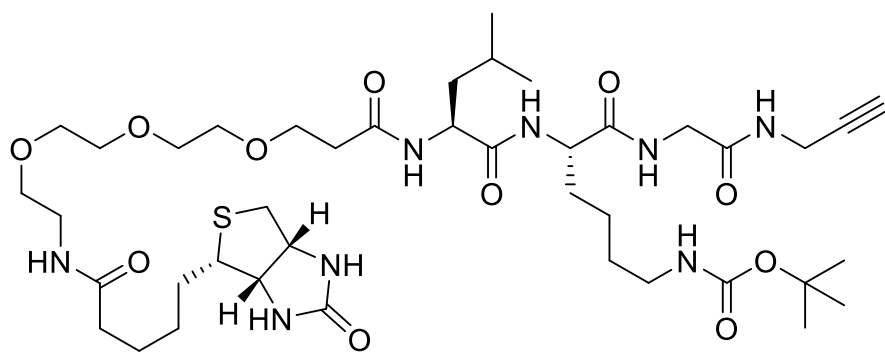

*N*-Fmoc tetrapeptide **14** (175.6 mg, 0.260 mmol) was deprotected according to General Procedure J, and was directly used in the following reaction: According to General Procedure

I, *N*-PEG-biotinylated tetrapeptide **33** (90.9 mg, 40%) was obtained from commercially sourced Biotin-PEG3-NHS ester (1.0 equiv.), following high-performance liquid chromatography (Avantor® ACE® 10 AQ 250 × 21.2 mm; 20 mL/min), isocratic hold (5.3 min) 18% $v/v$ ; linear gradient (46.9 min): 2% $v/v$  → 98% $v/v$  acetonitrile in water (each containing 0.1% $v/v$  formic acid);  $t_R$  = 19.0 min.

White solid;  $^1\text{H}$  NMR (600 MHz,  $\text{DMSO}-d_6$ ):  $\delta$  = 8.20 (t,  $J$  = 5.6 Hz, 1H), 8.11 (t,  $J$  = 5.9 Hz, 1H), 8.00 (d,  $J$  = 8.0 Hz, 1H), 7.94 (d,  $J$  = 7.5 Hz, 1H), 7.83 (t,  $J$  = 5.7 Hz, 1H), 6.73 (t,  $J$  = 5.7 Hz, 1H), 6.41 (d,  $J$  = 1.9 Hz, 1H), 6.35 (t,  $J$  = 1.4 Hz, 1H), 4.33 – 4.27 (m, 2H), 4.16 (dt,  $J$  = 7.9, 4.1 Hz, 1H), 4.12 (ddd,  $J$  = 7.7, 4.4, 1.8 Hz, 1H), 3.91 – 3.82 (m, 2H), 3.67 (qd,  $J$  = 16.7, 5.9 Hz, 2H), 3.62 – 3.55 (m, 2H), 3.52 – 3.44 (m, 8H), 3.38 (t,  $J$  = 6.0 Hz, 2H), 3.18 (q,  $J$  = 5.9 Hz, 2H), 3.12 – 3.05 (m, 2H), 2.87 (q,  $J$  = 6.7 Hz, 2H), 2.81 (dd,  $J$  = 12.4, 5.1 Hz, 1H), 2.57 (d,  $J$  = 12.4 Hz, 1H), 2.41 (dt,  $J$  = 14.0, 6.8 Hz, 1H), 2.33 (dt,  $J$  = 14.5, 6.3 Hz, 1H), 2.06 (t,  $J$  = 7.5 Hz, 2H), 1.67 – 1.57 (m, 3H), 1.55 – 1.41 (m, 6H), 1.36 (s, 9H), 1.34 – 1.16 (m, 6H), 0.88 (d,  $J$  = 6.6 Hz, 3H), 0.83 ppm (d,  $J$  = 6.6 Hz, 3H);  $^{13}\text{C}$  NMR (151 MHz,  $\text{DMSO}-d_6$ ):  $\delta$  = 172.3, 172.2, 171.9, 170.3, 168.5, 162.7, 155.6, 81.0, 77.4, 73.0, 69.7(4), 69.7, 69.6, 69.5, 69.2, 66.8, 61.1, 59.2, 55.4, 52.7, 51.0, 41.8, 40.6, 39.9, 39.7, 38.5, 36.0, 35.1, 31.4, 29.2, 28.3 (3C), 28.2, 28.1, 27.9, 25.3, 24.1, 23.1, 22.6,

21.6 ppm; IR (film):  $\tilde{\nu}$  = 3284 (br), 3078, 2934, 2870, 1649, 1536, 1458, 1366, 1252, 1169, 1098, 686  $\text{cm}^{-1}$ ; HRMS (ESI):  $m/z$  calculated for  $\text{C}_{41}\text{H}_{70}\text{N}_8\text{O}_{11}\text{SK}$  [ $M+K$ ] $^+$ : 921.4516, found: 921.4542.

**tert-butyl ((2*S*,26*S*)-23-isobutyl-5,21,24-trioxo-26-((2-oxo-2-(prop-2-yn-1-ylamino)ethyl)carbamoyl)-1-((3*S*,4*S*,6*aR*)-2-oxohexahydro-1*H*-thieno[3,4-*d*]imidazol-4-yl)-9,12,15,18-tetraoxa-6,22,25-triazatriacontan-30-yl)carbamate (34, bio-a-138)**

*N*-Fmoc tetrapeptide **14** (162.9 mg, 0.241 mmol) was deprotected according to General Procedure J, and was directly used in the following reaction: According to General Procedure I, *N*-PEG-biotinylated tetrapeptide **34** (137.7 mg, 65%) was obtained from commercially sourced Biotin-PEG4-NHS ester (0.95 equiv.), following high-performance liquid chromatography (Avantor® ACE® 10 AQ 250 × 21.2 mm; 20 mL/min), isocratic hold (5.3 min) 18% $_{\text{v/v}}$ ; linear gradient (46.9 min): 2% $_{\text{v/v}}$  → 98% $_{\text{v/v}}$  acetonitrile in water (each containing 0.1% $_{\text{v/v}}$  formic acid);  $t_{\text{R}}$  = 19.0 min.

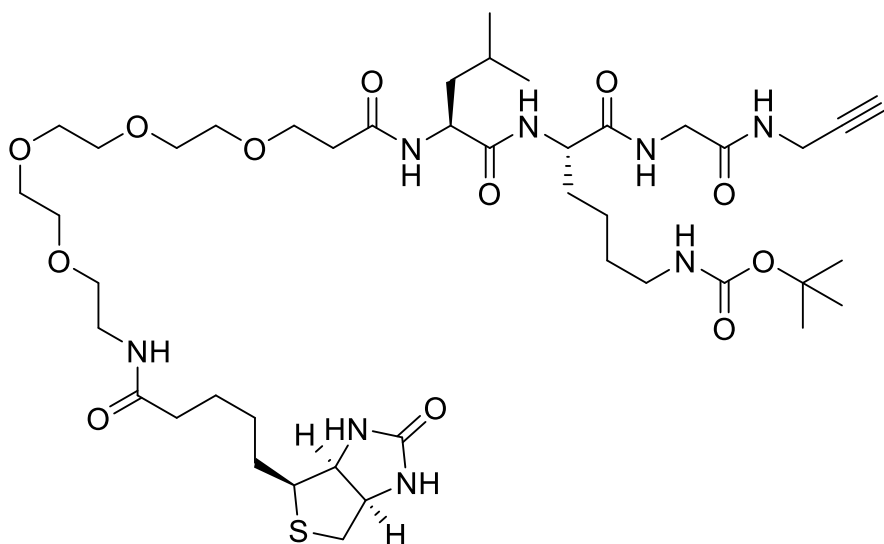

White solid;  $^1\text{H}$  NMR (600 MHz,  $\text{DMSO}-d_6$ ):  $\delta$  = 8.20 (t,  $J$  = 5.6 Hz, 1H), 8.11 (t,  $J$  = 5.9 Hz, 1H), 8.00 (d,  $J$  = 8.0 Hz, 1H), 7.94 (d,  $J$  = 7.5 Hz, 1H), 7.83 (t,  $J$  = 5.7 Hz, 1H), 6.73 (t,  $J$  = 5.7 Hz, 1H), 6.41 (t,  $J$  = 1.9 Hz, 1H), 6.35 (t,  $J$  = 1.5 Hz, 1H), 4.33 – 4.26 (m, 2H), 4.18 – 4.10 (m, 2H), 3.86 (ddd,  $J$  = 5.6, 4.1, 2.5 Hz, 2H), 3.67 (qd,  $J$  = 16.7,

5.9 Hz, 2H), 3.73 – 3.54 (m, 2H), 3.53 – 3.42 (m, 12H), 3.39 (t,  $J$  = 5.9 Hz, 2H), 3.18 (q,  $J$  = 5.9 Hz, 2H), 3.12 – 3.05 (m, 2H), 2.87 (q,  $J$  = 6.8 Hz, 2H), 2.81 (dd,  $J$  = 12.4, 5.1 Hz, 1H), 2.57 (d,  $J$  = 12.4 Hz, 1H), 2.41 (dt,  $J$  = 13.9, 6.8 Hz, 1H), 2.33 (dt,  $J$  = 14.5, 6.3 Hz, 1H), 2.06 (t,  $J$  = 7.5 Hz, 2H), 1.68 – 1.56 (m, 3H), 1.56 – 1.39 (m, 6H), 1.36 (s, 9H), 1.36 – 1.14 (m, 6H), 0.88 (d,  $J$  = 6.6 Hz, 3H), 0.83 ppm (d,  $J$  = 6.5 Hz, 3H);  $^{13}\text{C}$  NMR (151 MHz,  $\text{DMSO}-d_6$ ):  $\delta$  = 172.3, 172.2, 171.9, 170.3, 168.5, 162.8, 155.6, 81.0, 77.4, 73.0, 69.8(1) (2C), 69.8, 69.7, 69.6, 69.5, 69.2, 66.9, 61.1, 59.2, 55.4, 52.7, 51.0, 41.8, 40.6, 39.9, 39.7, 38.5, 36.0, 35.1, 31.4, 29.2, 28.3 (3C), 28.2, 28.1, 27.9, 25.3, 24.1, 23.1, 22.6, 21.6 ppm; IR (film):  $\tilde{\nu}$  = 3296 (br), 3082, 2931, 2869, 1650, 1540, 1457, 1366, 1251, 1168, 1101, 686  $\text{cm}^{-1}$ ; HRMS (ESI):  $m/z$  calculated for  $\text{C}_{43}\text{H}_{75}\text{N}_8\text{O}_{12}\text{S}$  [ $M+H$ ] $^+$ : 927.5220, found: 927.5229.

***N*-((*S*)-4-methyl-1-oxo-1-(((*S*)-1-oxo-1-((2-oxo-2-(prop-2-yn-1-ylamino)ethyl)amino)-6-(2,2,2-trifluoroacetamido)hexan-2-yl)amino)pentan-2-yl)-1-(5-((3*aS*,4*S*,6*aR*)-2-oxohexahydro-1*H*-**

**thieno[3,4-*d*]imidazol-4-yl)pentanamido)-3,6,9,12-tetraoxapentadecan-15-amide (35, bio-a-25b)**

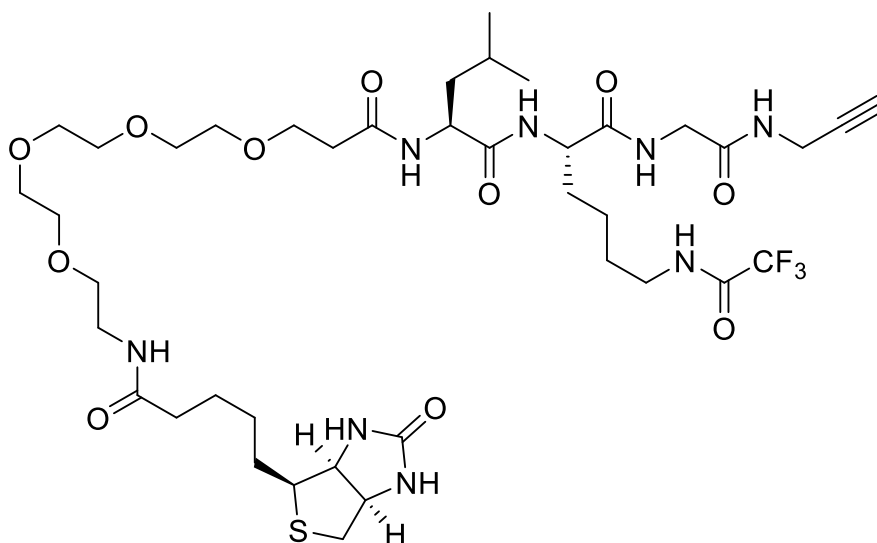

*N*-Boc tetrapeptide **34** (133.8 mg, 0.144 mmol) was deprotected according to General Procedure G. Commercially sourced 4-(*N,N*-

dimethylamino)pyridine (1.05 equiv.), anhydrous tetrahydrofuran (0.09 M) and anhydrous *N,N*-dimethylformamide (0.27 M) were added. At 0 °C, commercially sourced trifluoroacetic anhydride (1.2 equiv.) was added, and twice more at ambient temperature (1.2 equiv. each) at 1 h and at 15 h. After stirring for 20h, the reaction mixture was concentrated under reduced pressure, and purified via high-performance liquid chromatography (Avantor® ACE® 10 AQ 250 × 21.2 mm; 20 mL/min) isocratic hold (9.9 min) 2%<sub>v/v</sub>; linear gradient (16.2 min): 2%<sub>v/v</sub> → 15%<sub>v/v</sub>; isocratic hold (30.6 min) 15%<sub>v/v</sub>; linear gradient (52.7 min): 15%<sub>v/v</sub> → 98%<sub>v/v</sub> acetonitrile in water (each containing 0.1%<sub>v/v</sub> formic acid); *t*<sub>R</sub> = 69.0 min, followed by high-performance liquid chromatography (Avantor® ACE® 10 AQ 250 × 21.2 mm; 20 mL/min) isocratic hold (9.7 min) 2%<sub>v/v</sub>; linear gradient (15.8 min): 2%<sub>v/v</sub> → 15%<sub>v/v</sub>; isocratic hold (24.8 min) 15%<sub>v/v</sub>; linear gradient (26.1 min): 15%<sub>v/v</sub> → 34%<sub>v/v</sub>; linear gradient (33.1 min): 34%<sub>v/v</sub> → 98%<sub>v/v</sub> acetonitrile in water (each containing 0.1%<sub>v/v</sub> formic acid) *t*<sub>R</sub> = 73.0 min, to give the desired peptide **35** (2.5 mg, 2%).

White solid; <sup>1</sup>H NMR (600 MHz, DMSO-*d*<sub>6</sub>): δ = 9.40 (t, *J* = 5.7 Hz, 1H), 8.21 (t, *J* = 5.6 Hz, 1H), 8.12 (t, *J* = 5.9 Hz, 1H), 8.02 (d, *J* = 8.0 Hz, 1H), 7.97 (d, *J* = 7.6 Hz, 1H), 7.83 (t, *J* = 5.7 Hz, 1H), 6.41 (t, *J* = 1.9 Hz, 1H), 6.35 (s, 1H), 4.33 – 4.26 (m, 2H), 4.23 – 4.14 (m, 1H), 4.12 (ddd, *J* = 7.8, 4.4, 1.9 Hz, 1H), 3.90 – 3.82 (m, 2H), 3.67 (qd, *J* = 16.6, 5.9 Hz, 2H), 3.62 – 3.54 (m, 2H), 3.53 – 3.44 (m, 12H), 3.39 (t, *J* = 5.9 Hz, 2H), 3.18 (q, *J* = 6.0 Hz, 2H), 3.14 (q, *J* = 6.5 Hz, 2H), 3.12 – 3.06 (m, 2H), 2.82 (dd, *J* = 12.4, 5.1 Hz, 1H), 2.57 (d, *J* = 12.4 Hz, 1H), 2.45 – 2.38 (m, 1H), 2.33 (dt, *J* = 14.5, 6.3 Hz, 1H), 2.06 (t, *J* = 7.4 Hz, 2H), 1.71 – 1.53 (m, 4H), 1.52 – 1.41 (m, 7H), 1.37 – 1.23 (m, 4H), 0.88 (d, *J* = 6.6 Hz, 3H), 0.84 ppm (d, *J* = 6.6 Hz, 3H); <sup>13</sup>C NMR (151 MHz, DMSO-*d*<sub>6</sub>): δ = 172.3, 172.1, 171.8, 170.2, 168.5, 162.7, 156.1 (q, *J* = 36.0 Hz), 116.0 (q, *J* = 288.2 Hz), 81.0, 73.0, 69.8 (2C), 69.7(1), 69.7, 69.6, 69.5, 69.2, 66.8, 61.0, 59.2, 55.4, 52.5, 51.0, 41.8, 40.6, 40.4, 40.1, 38.4, 35.9, 35.1, 31.2, 28.2, 28.0, 27.9(2), 27.9, 25.3, 24.1, 23.1, 22.5, 21.5 ppm; <sup>19</sup>F NMR (565 MHz, DMSO-*d*<sub>6</sub>): δ = -74.4 ppm (s, 3F); IR (film):  $\tilde{\nu}$  = 3306 (br), 3080, 2971, 2931, 2360, 2341, 1652, 1550, 1465, 1380, 1355, 1249, 1204, 1162, 1130, 1105, 953, 676 cm<sup>-1</sup>; HRMS (ESI): *m/z* calculated for C<sub>40</sub>H<sub>66</sub>F<sub>3</sub>N<sub>8</sub>O<sub>11</sub>S [*M*+H]<sup>+</sup>: 923.4518, found: 923.4541.

**<sup>1</sup>H, <sup>13</sup>C, and <sup>19</sup>F NMR spectra of final compounds**

**Compound 25d**

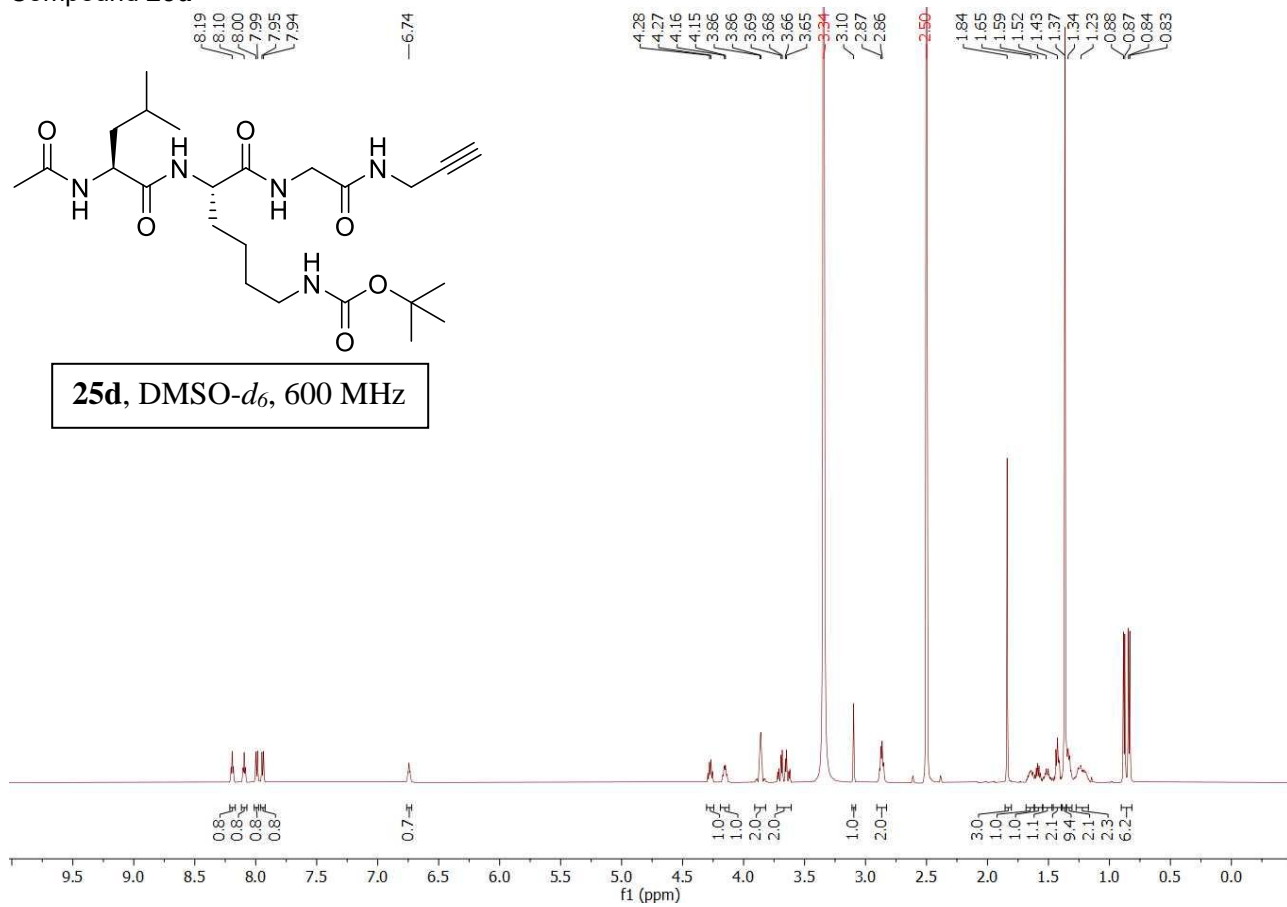

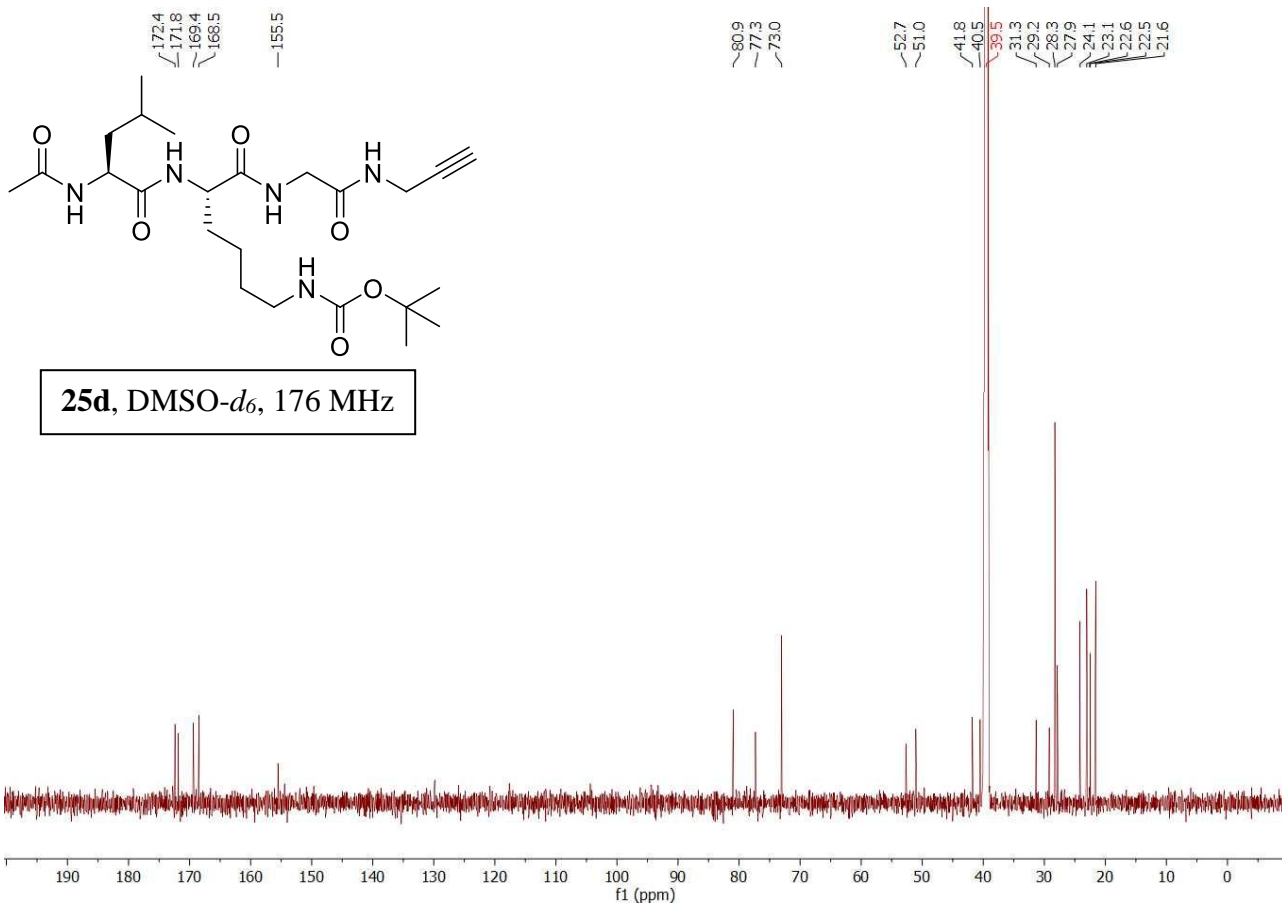



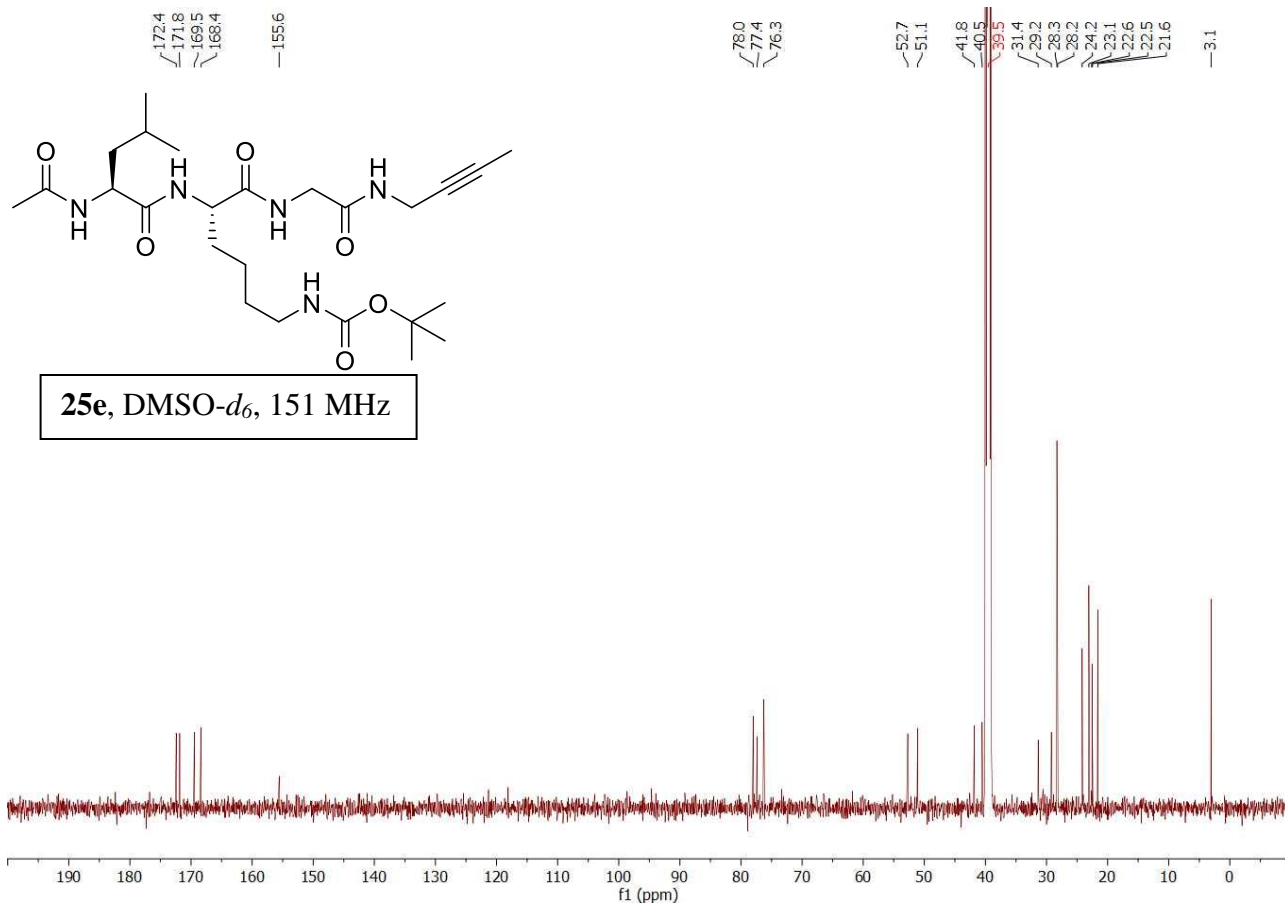

Compound **25f**

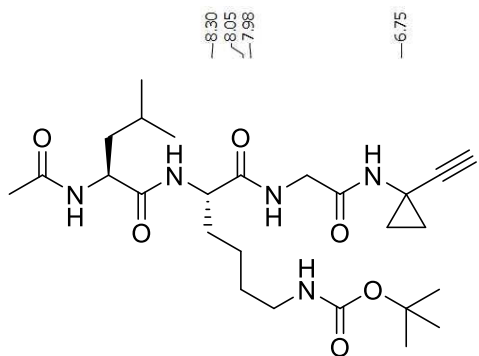

**25f**, DMSO-*d*<sub>6</sub>, 400 MHz

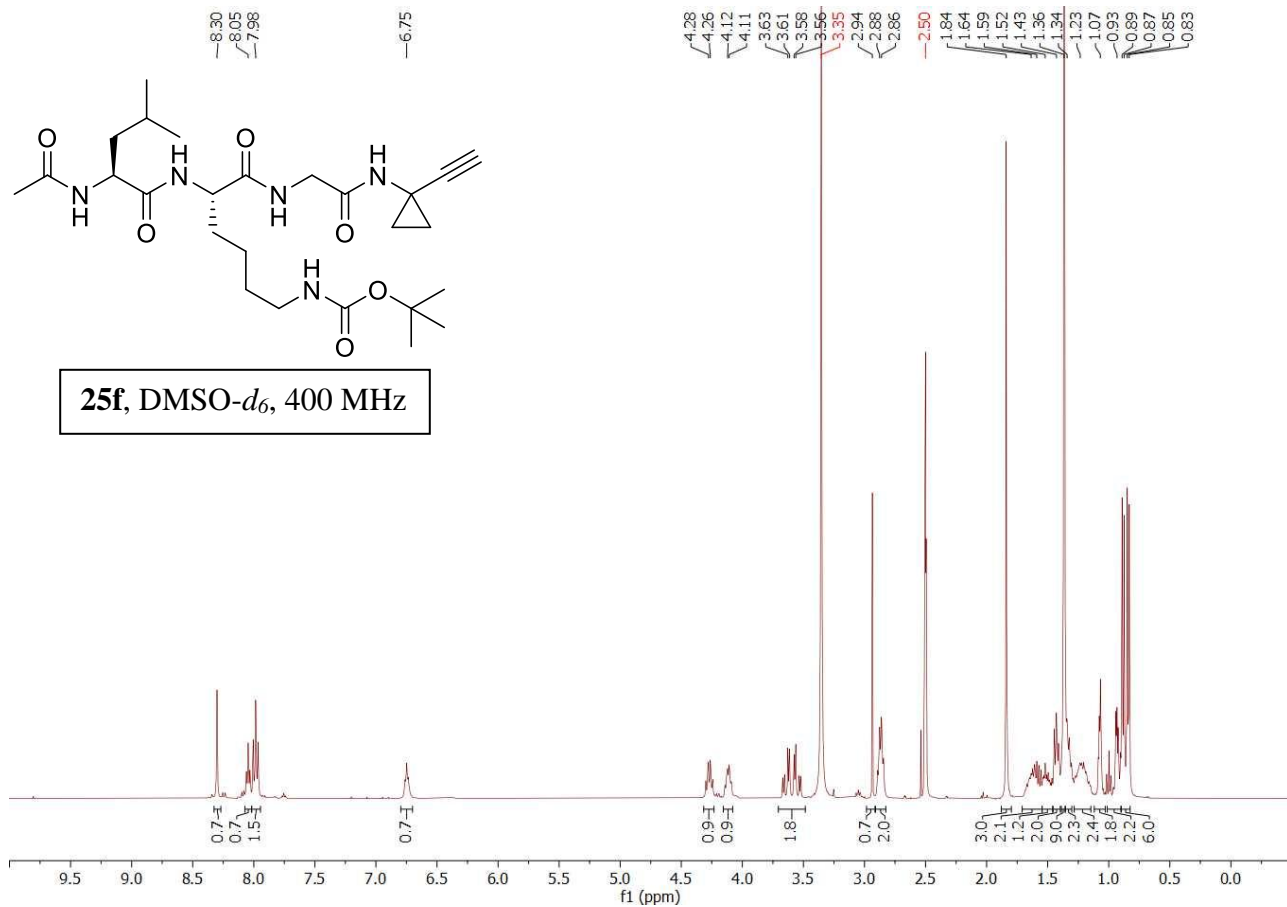

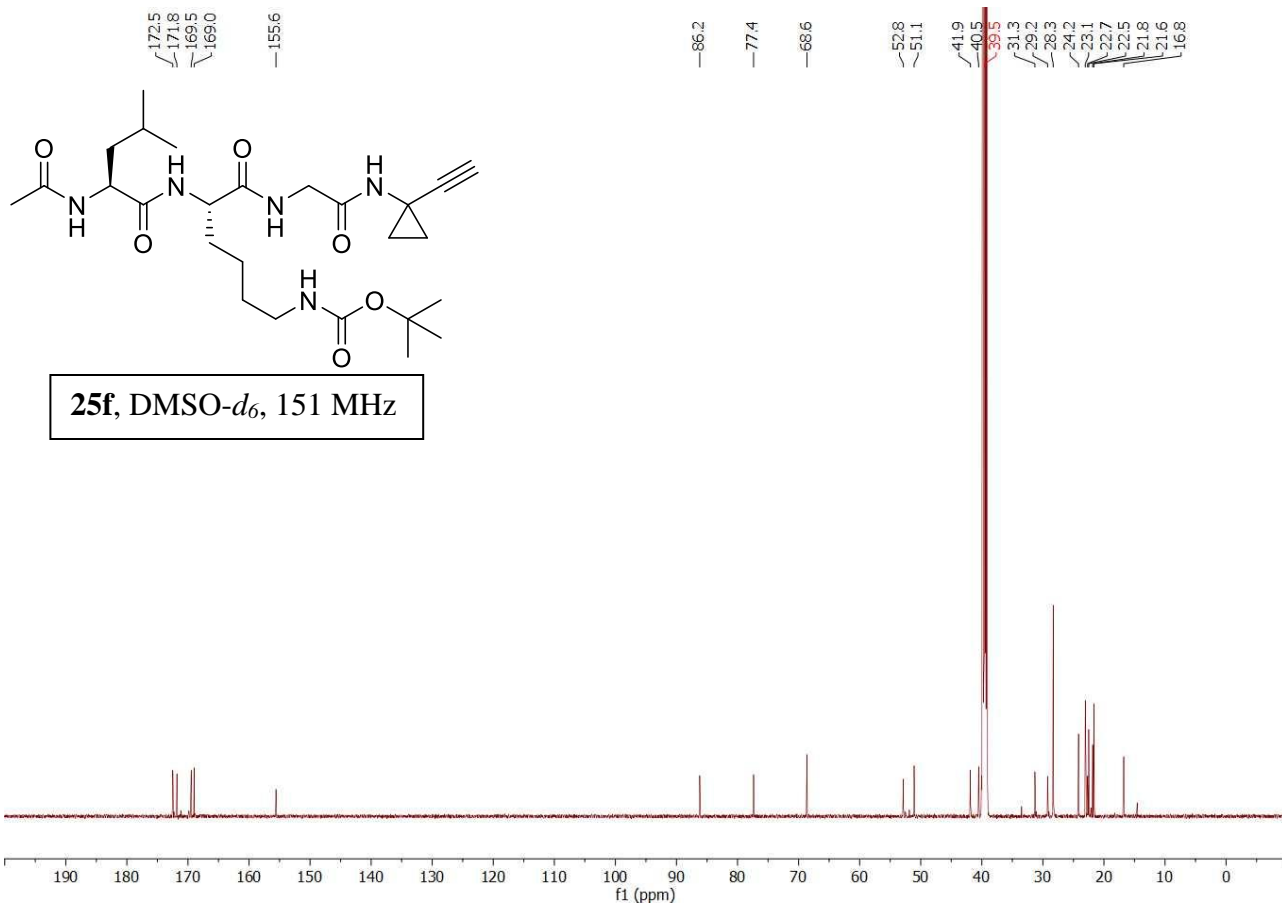

Compound **25c**

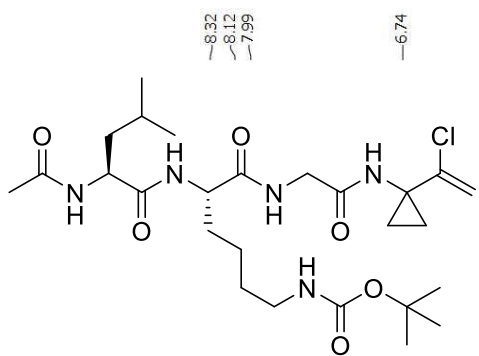

**25c**, DMSO-*d*<sub>6</sub>, 600 MHz

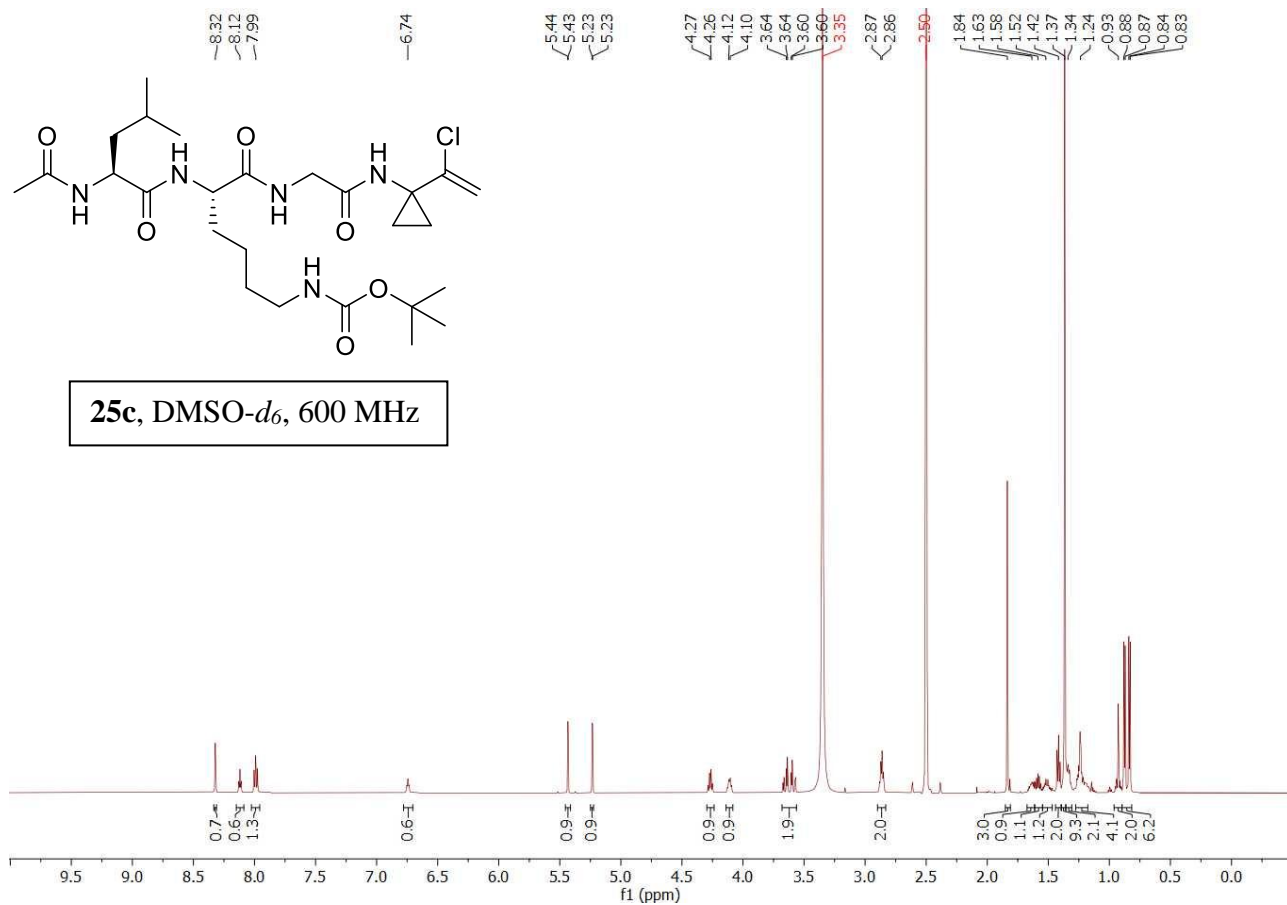

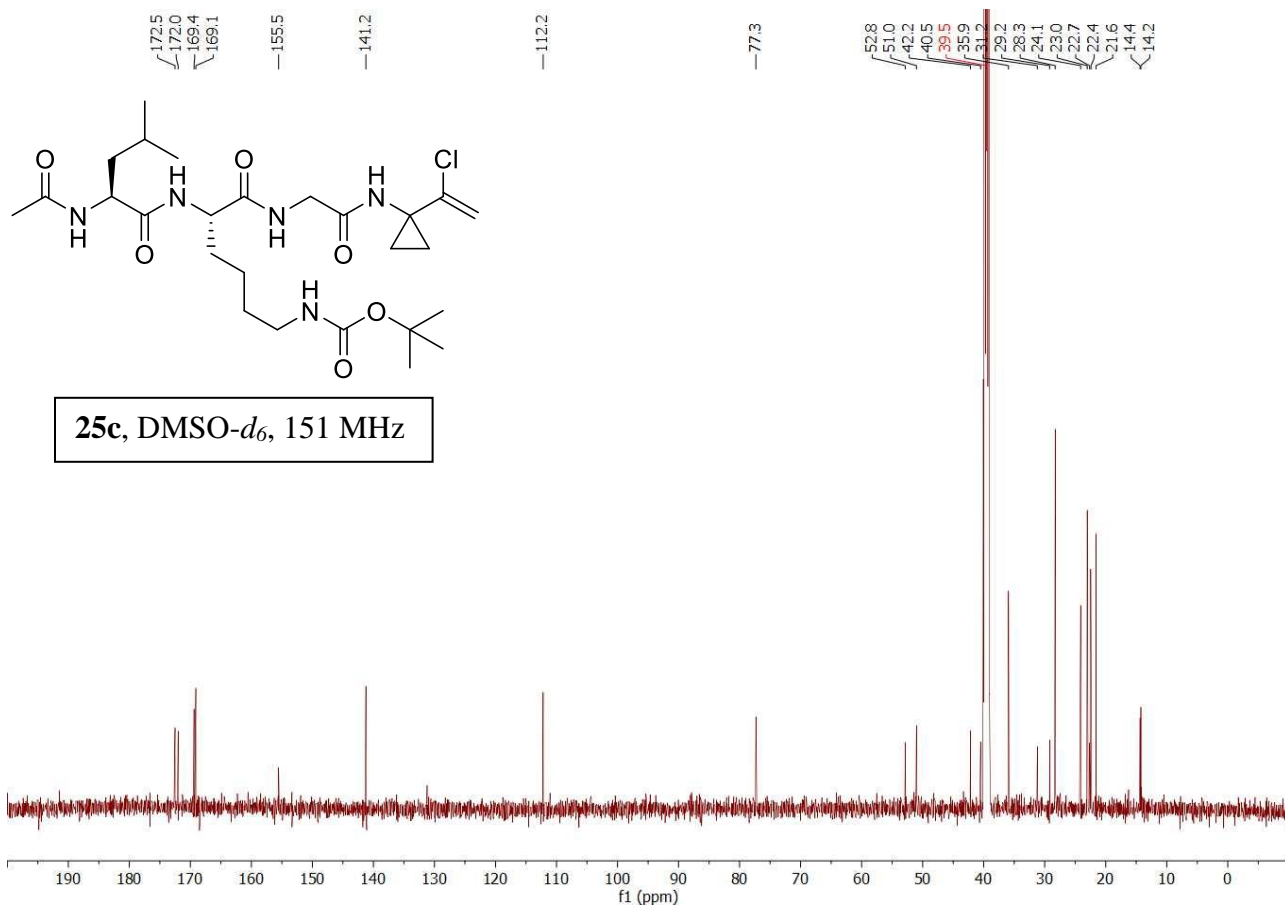

Compound **25g**

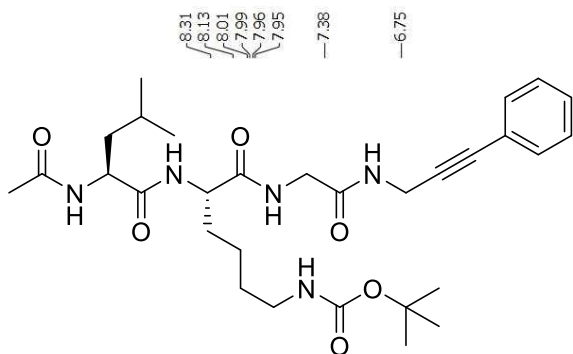

**25g**, DMSO-*d*<sub>6</sub>, 400 MHz

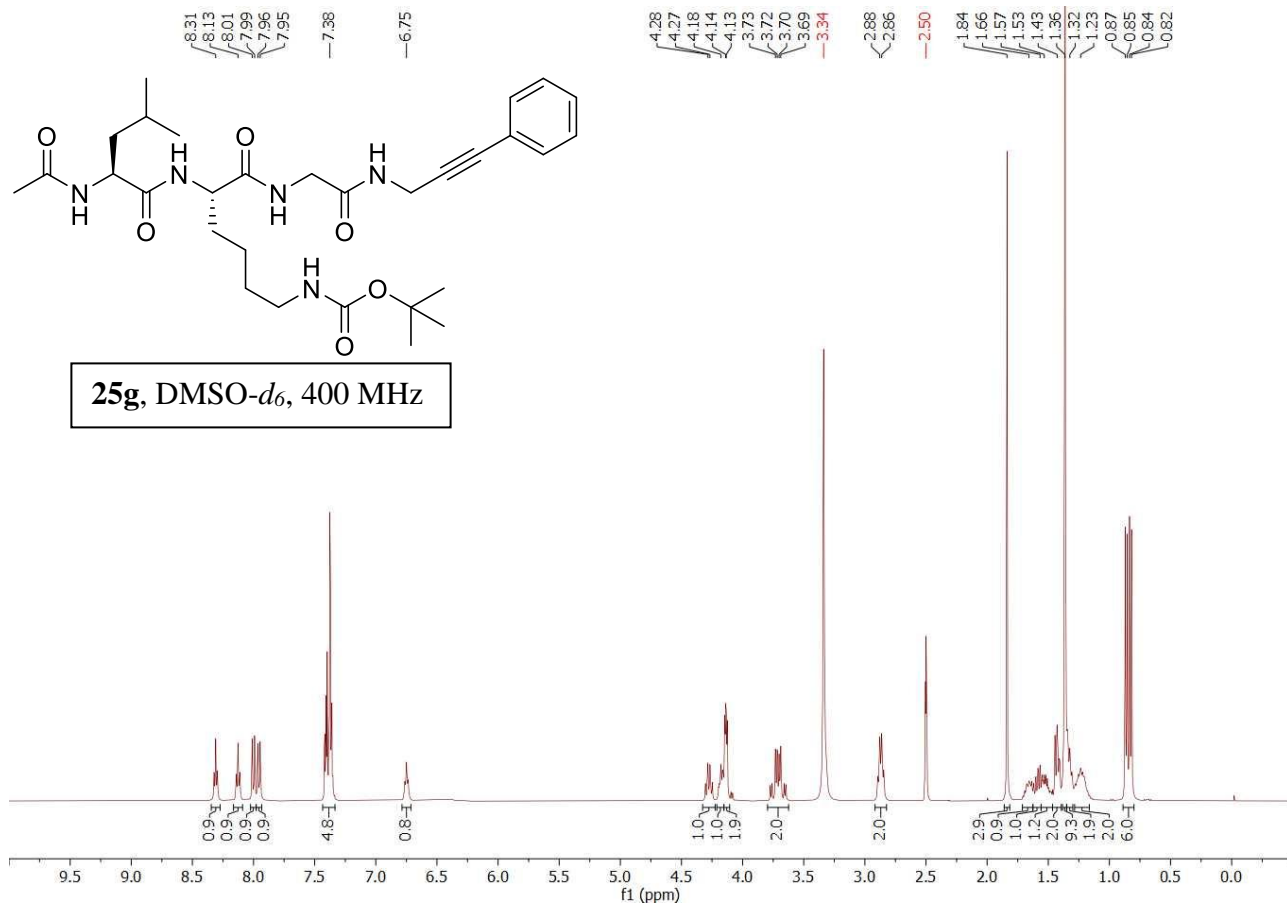

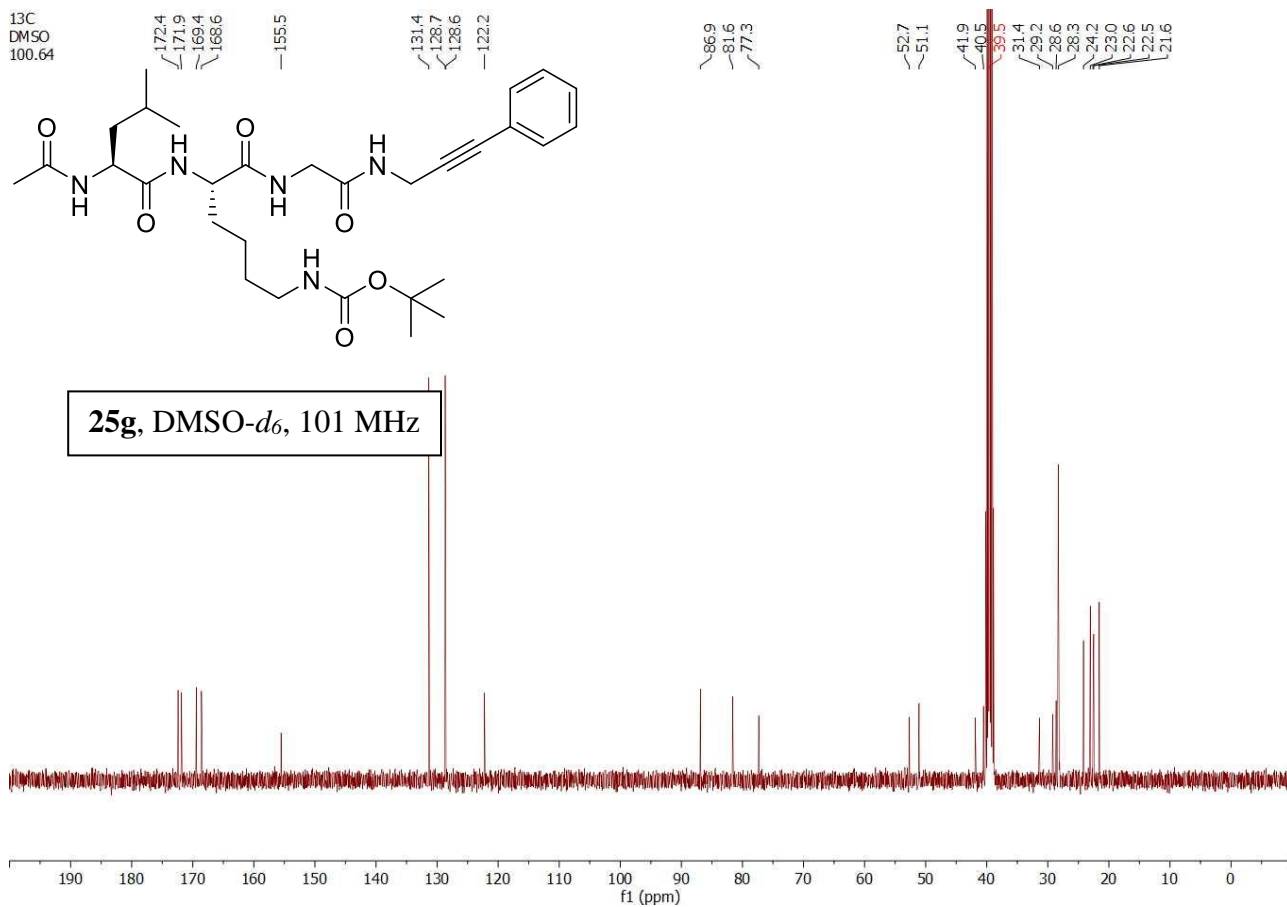

Compound **25a**

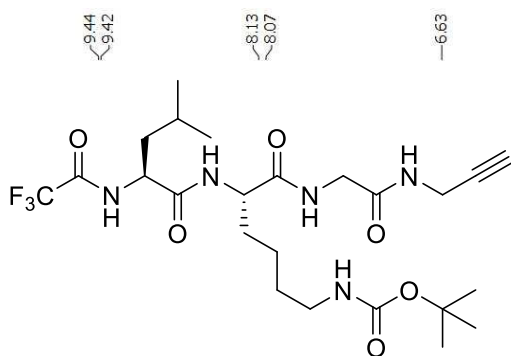

**25a**, DMSO-*d*<sub>6</sub>, 400 MHz

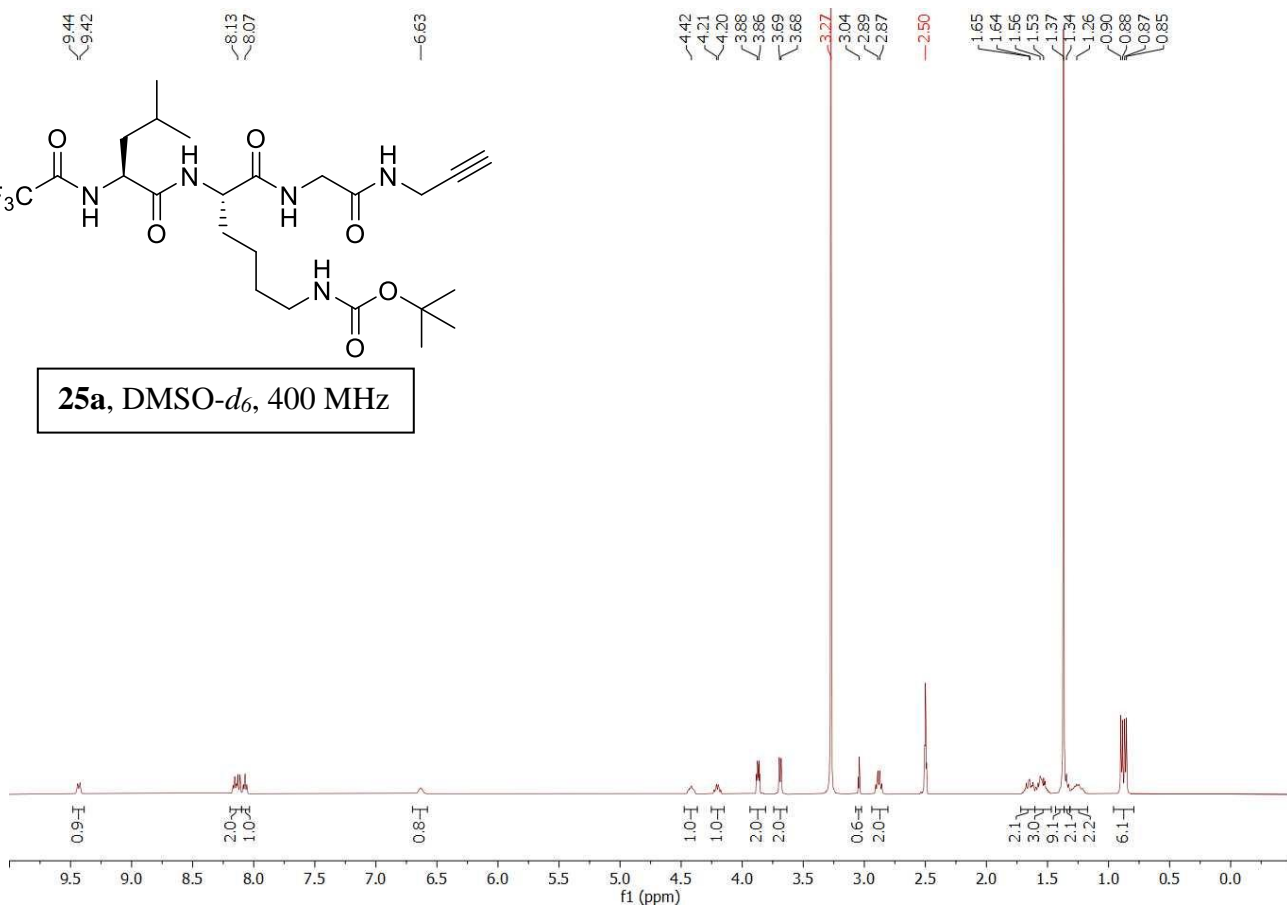

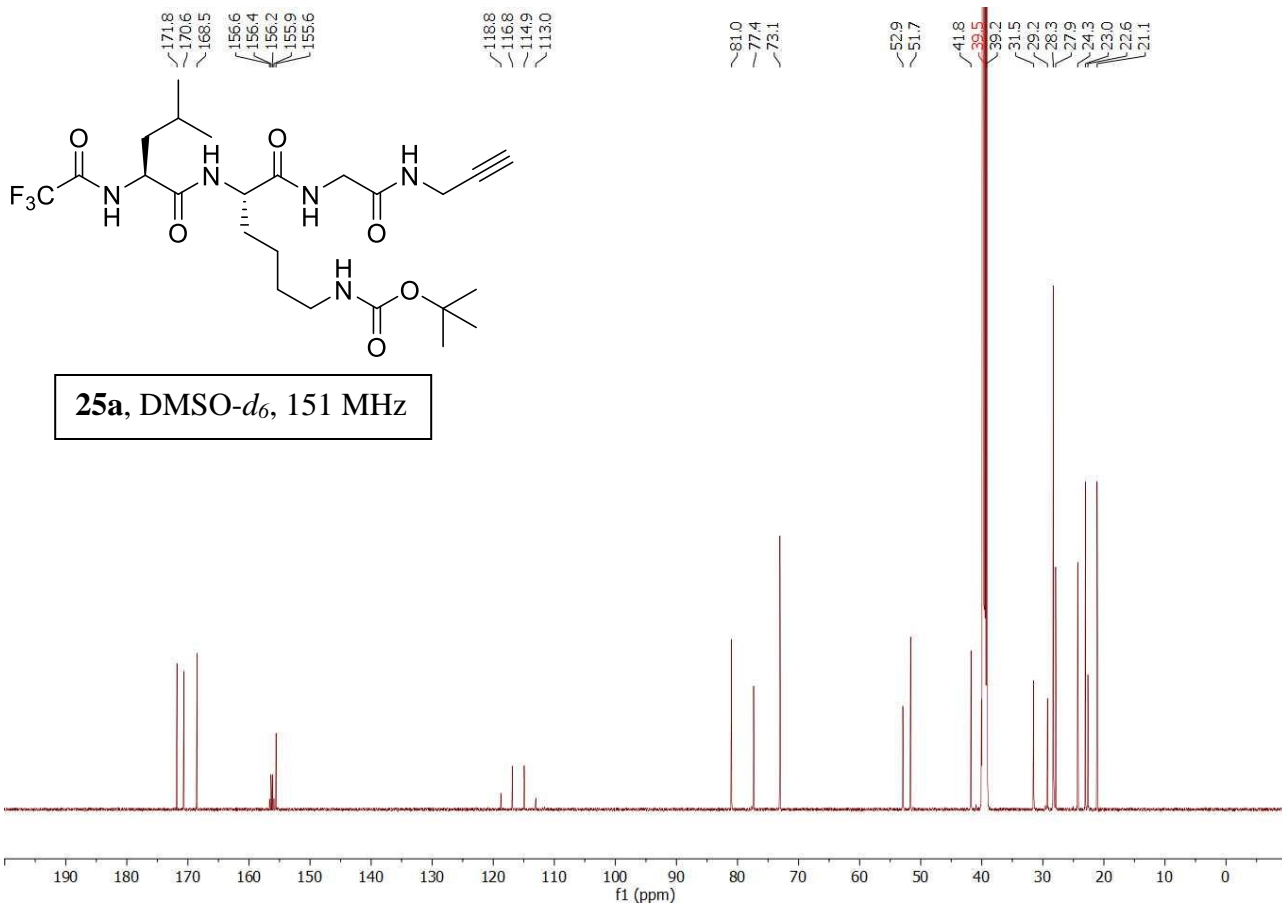

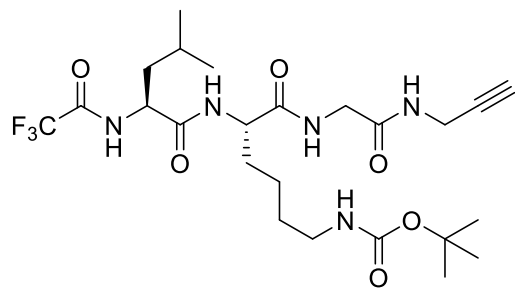

**25a**, DMSO-*d*<sub>6</sub>, 376 MHz

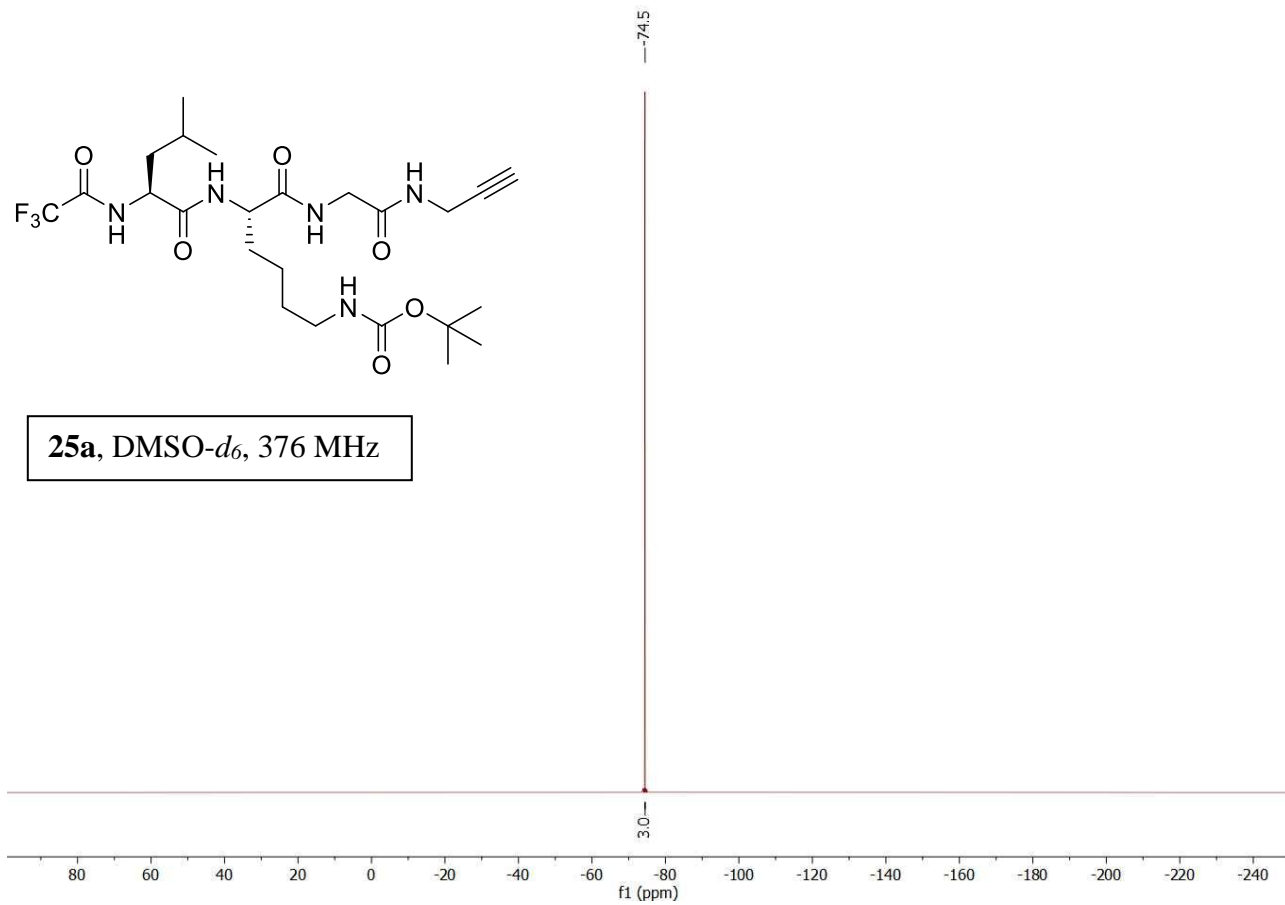

Compound **25**

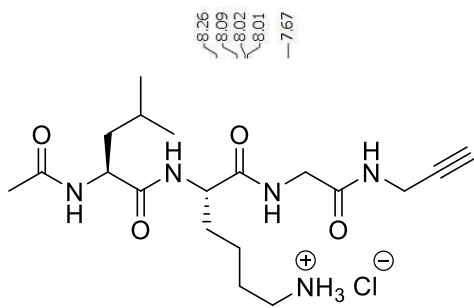

**25**, DMSO-*d*<sub>6</sub>, 400 MHz

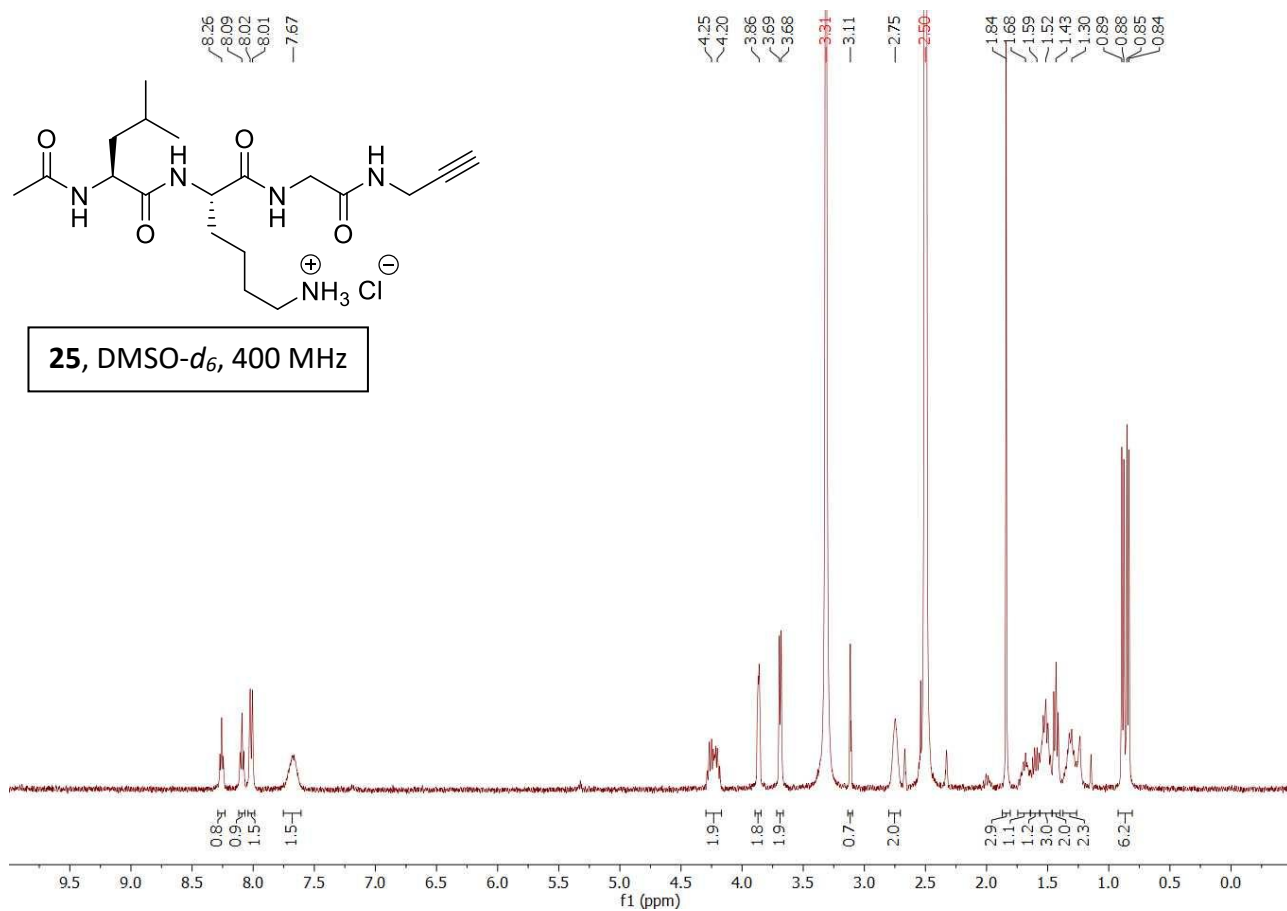

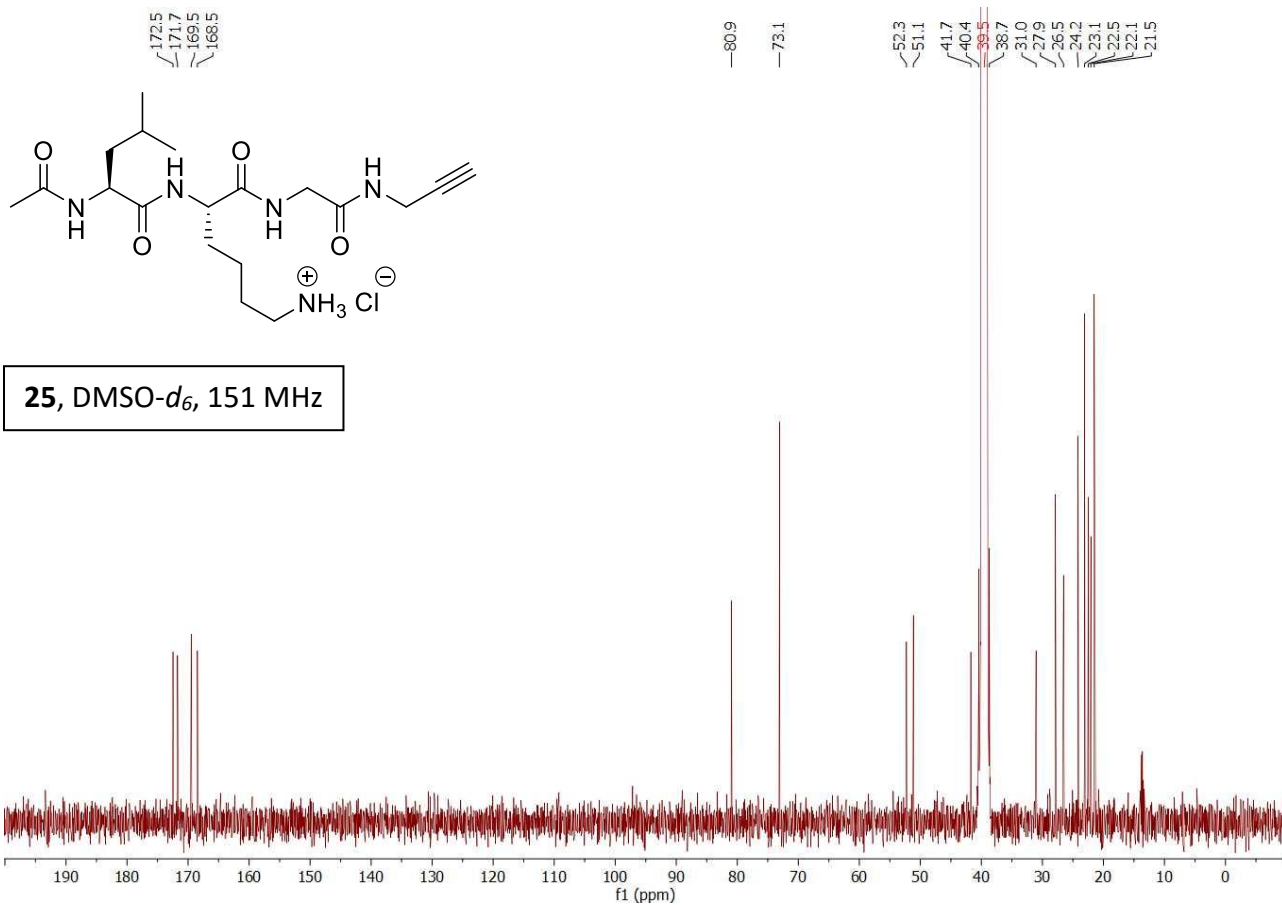

Compound **25j**

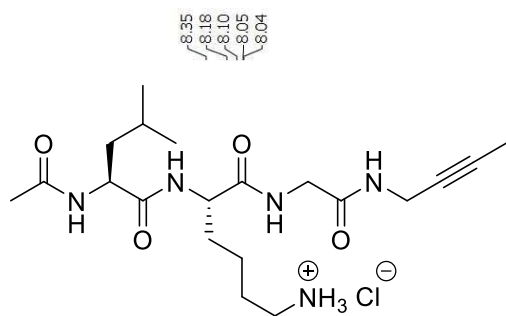

**25j**, DMSO-*d*<sub>6</sub>, 400 MHz

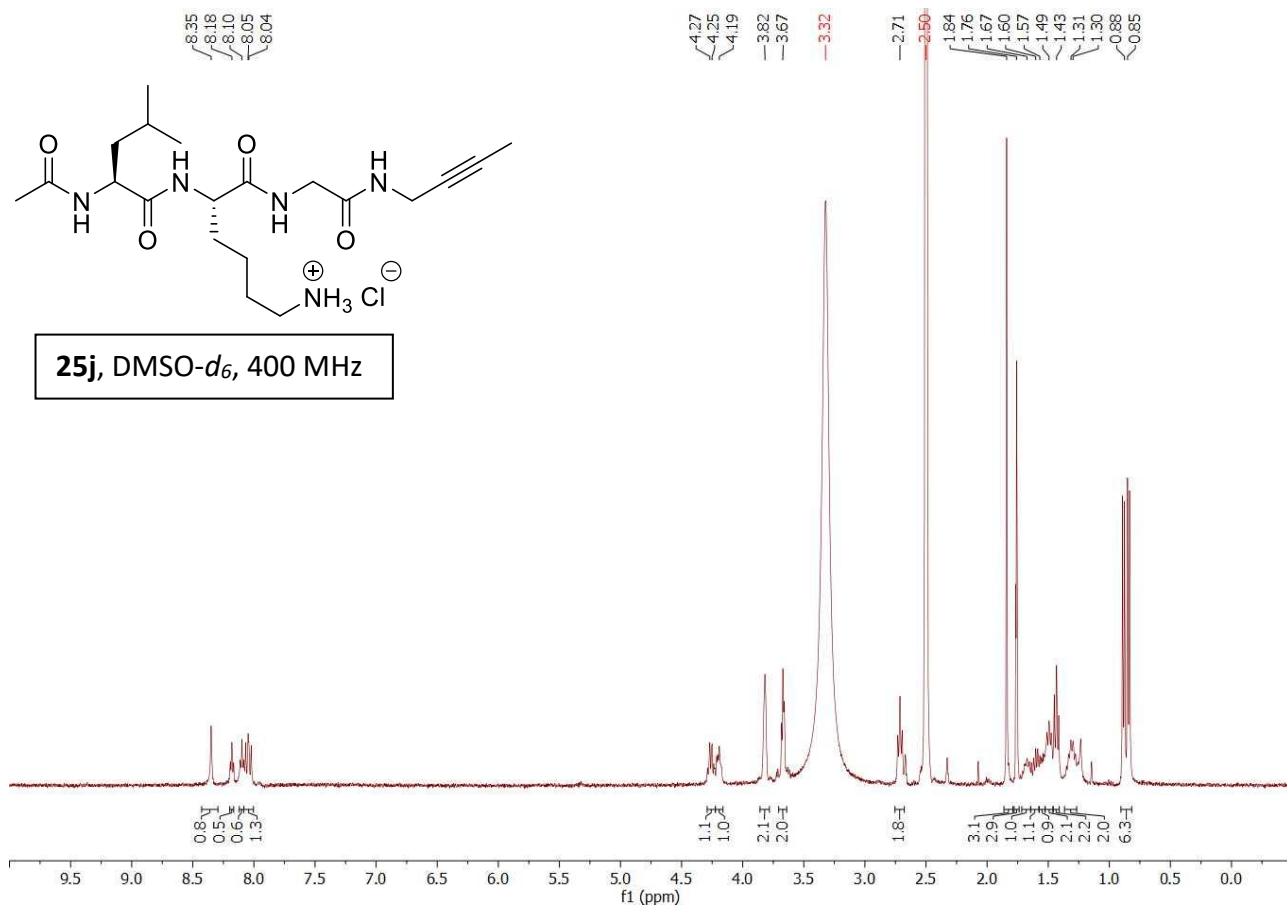

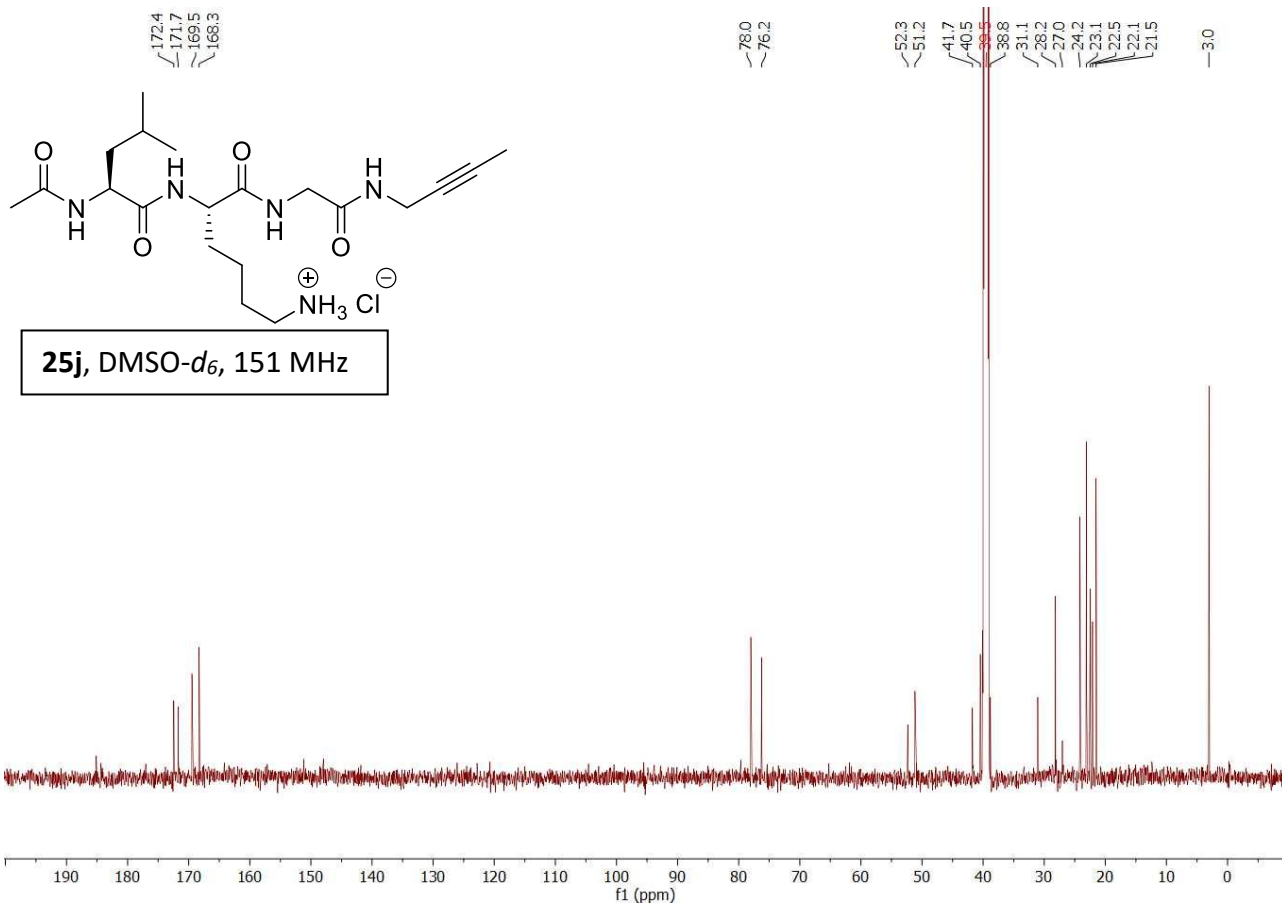

Compound **25h**

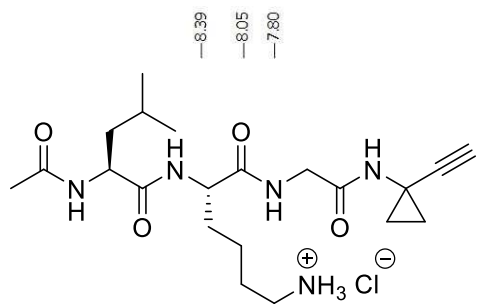

**25h**, DMSO-*d*<sub>6</sub>, 400 MHz

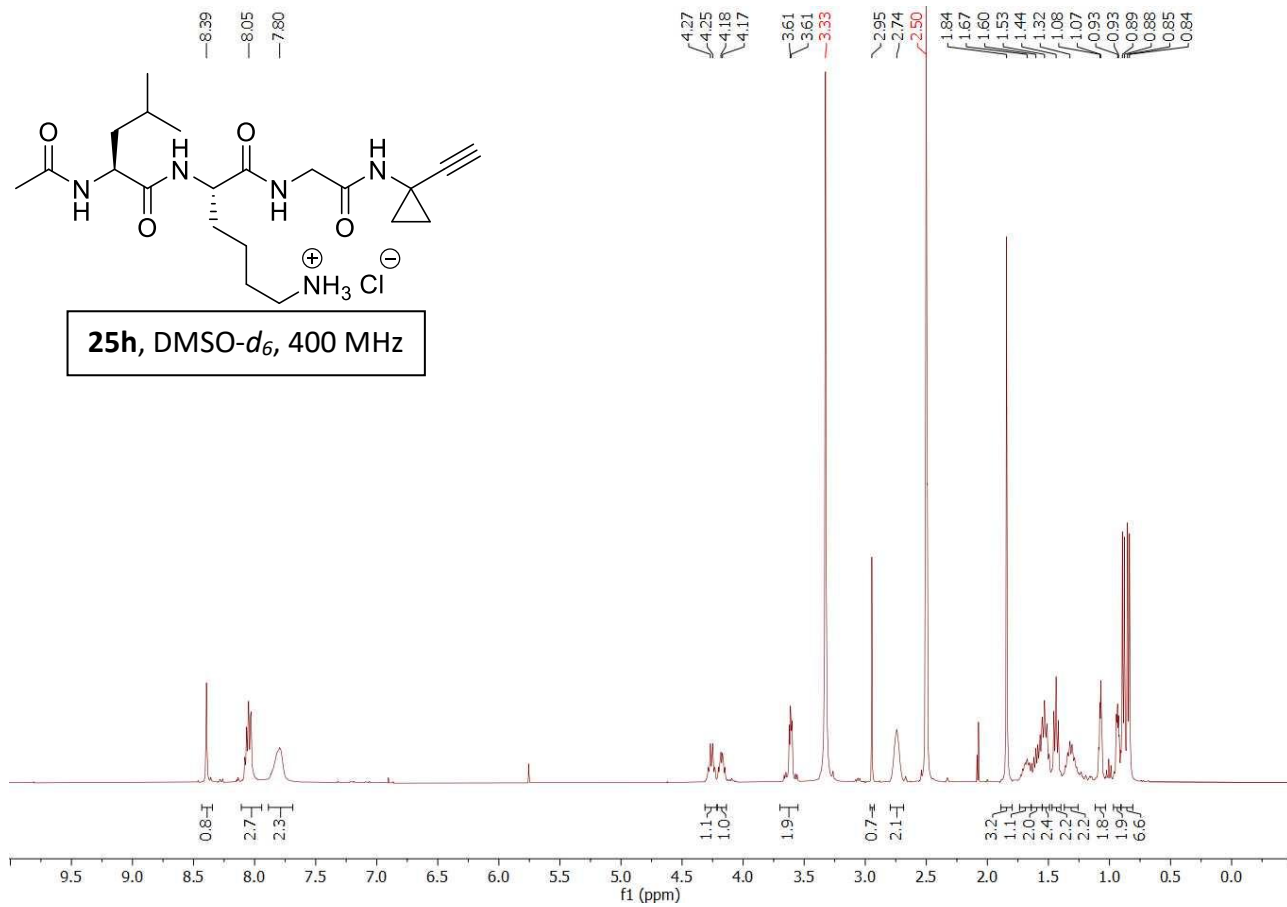

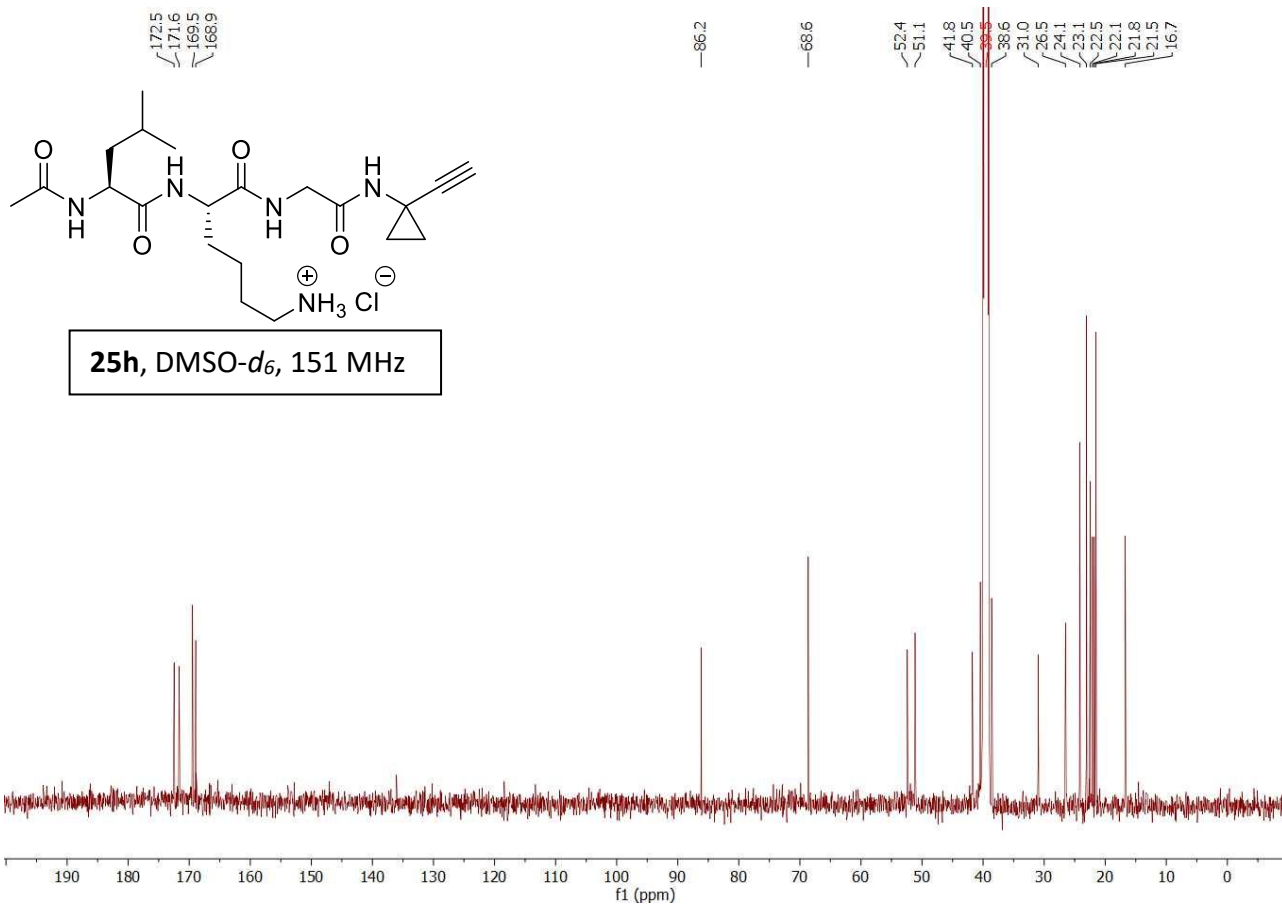

Compound **25i**

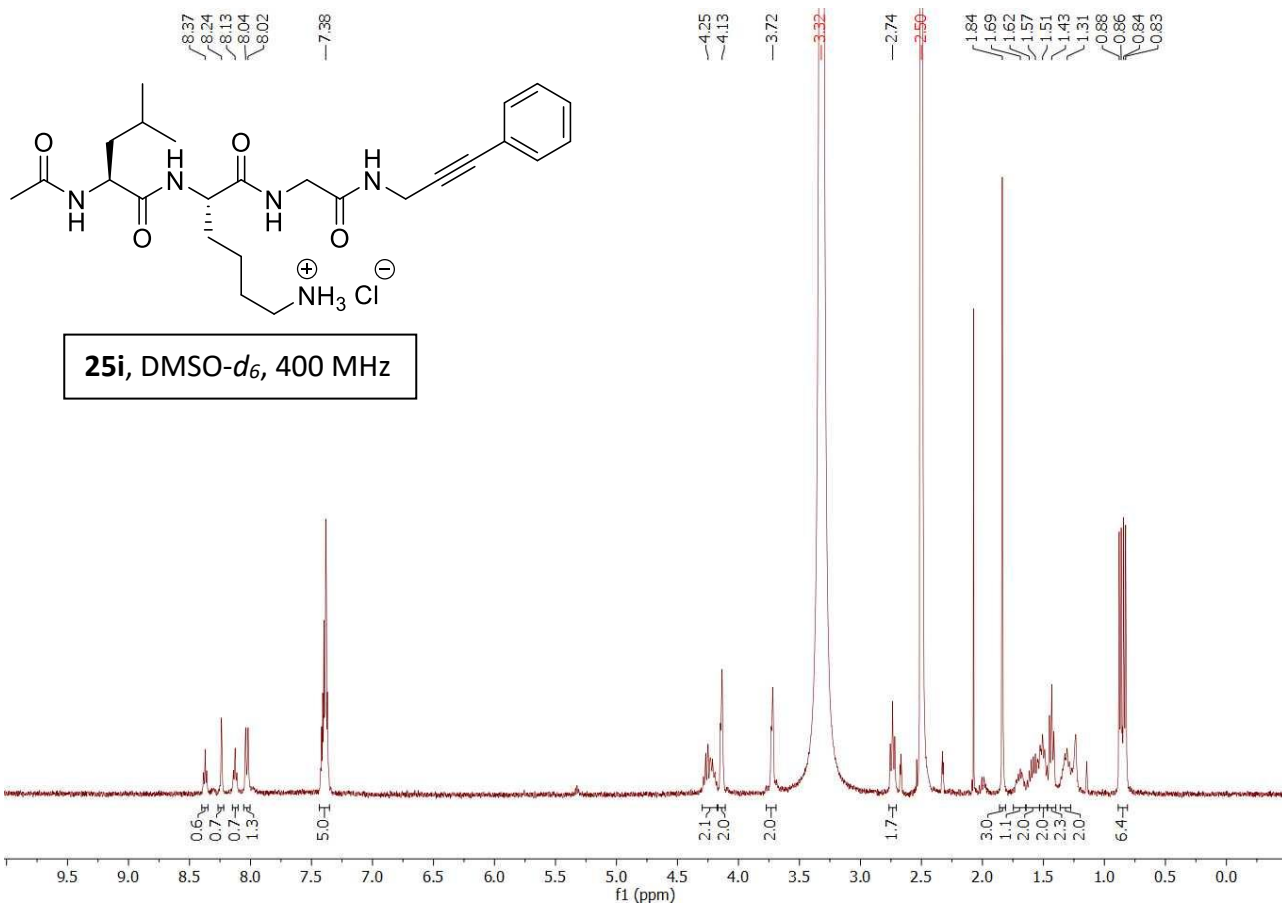

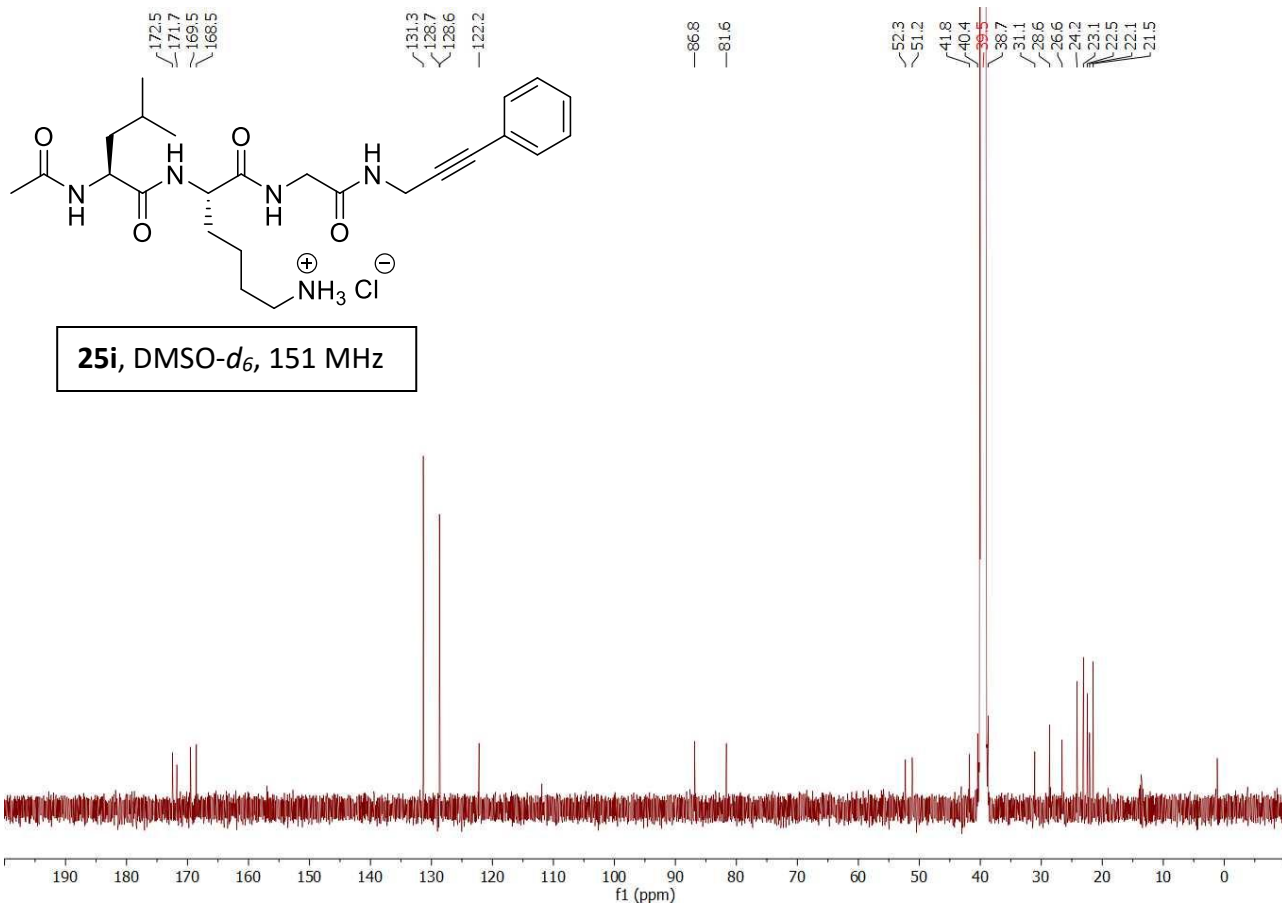

Compound **25k**

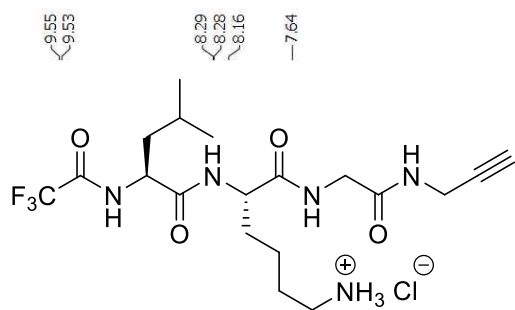

**25k**, DMSO-*d*<sub>6</sub>, 400 MHz

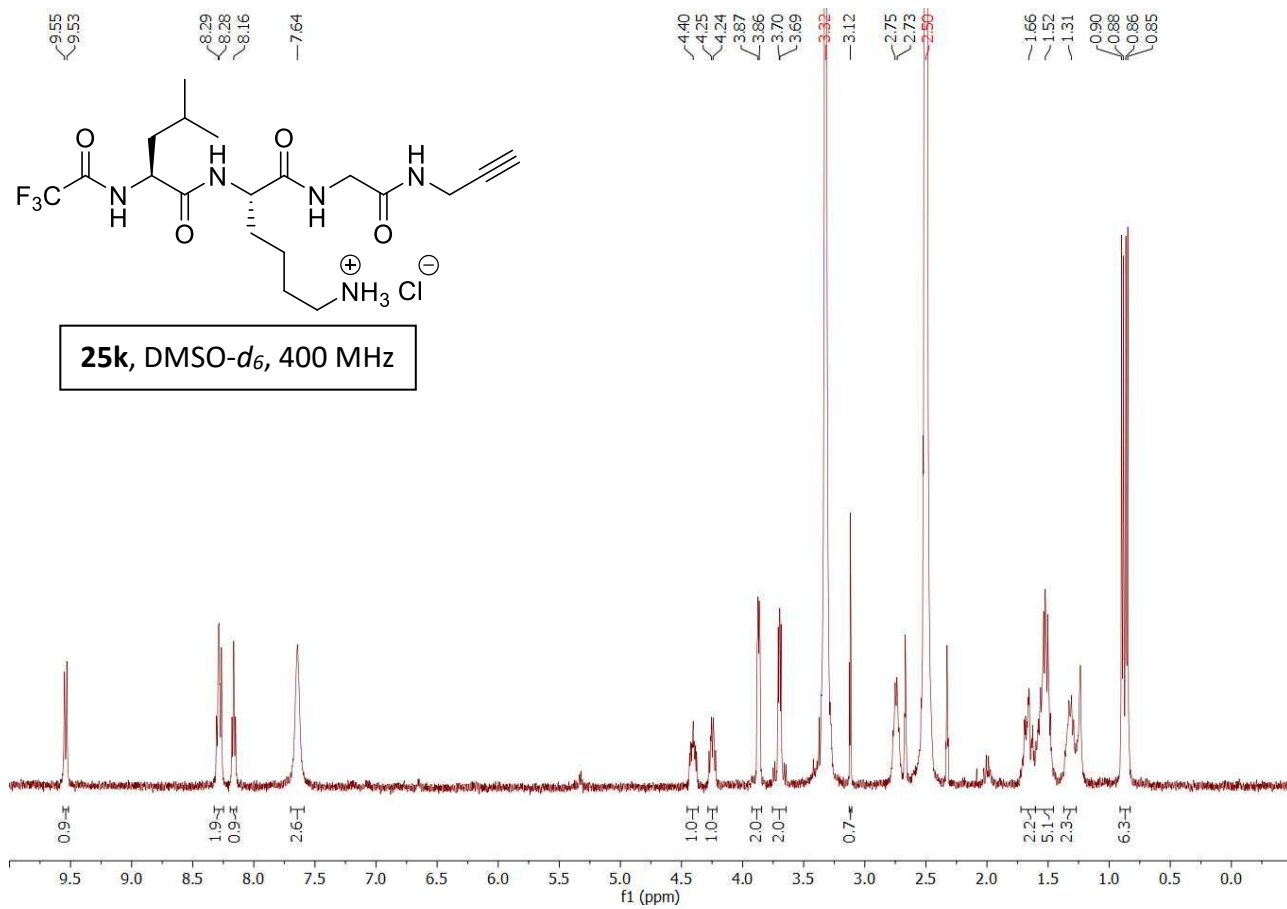

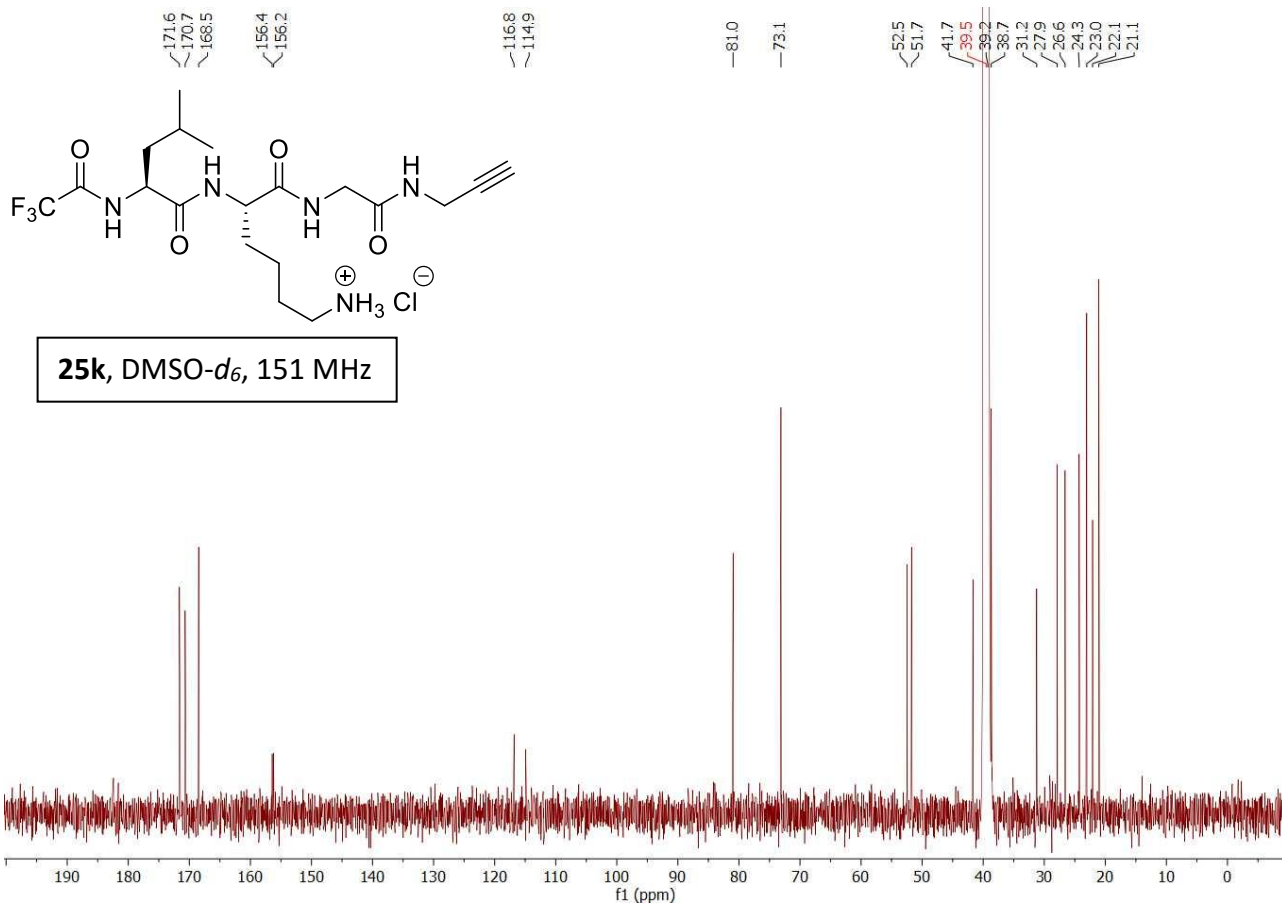

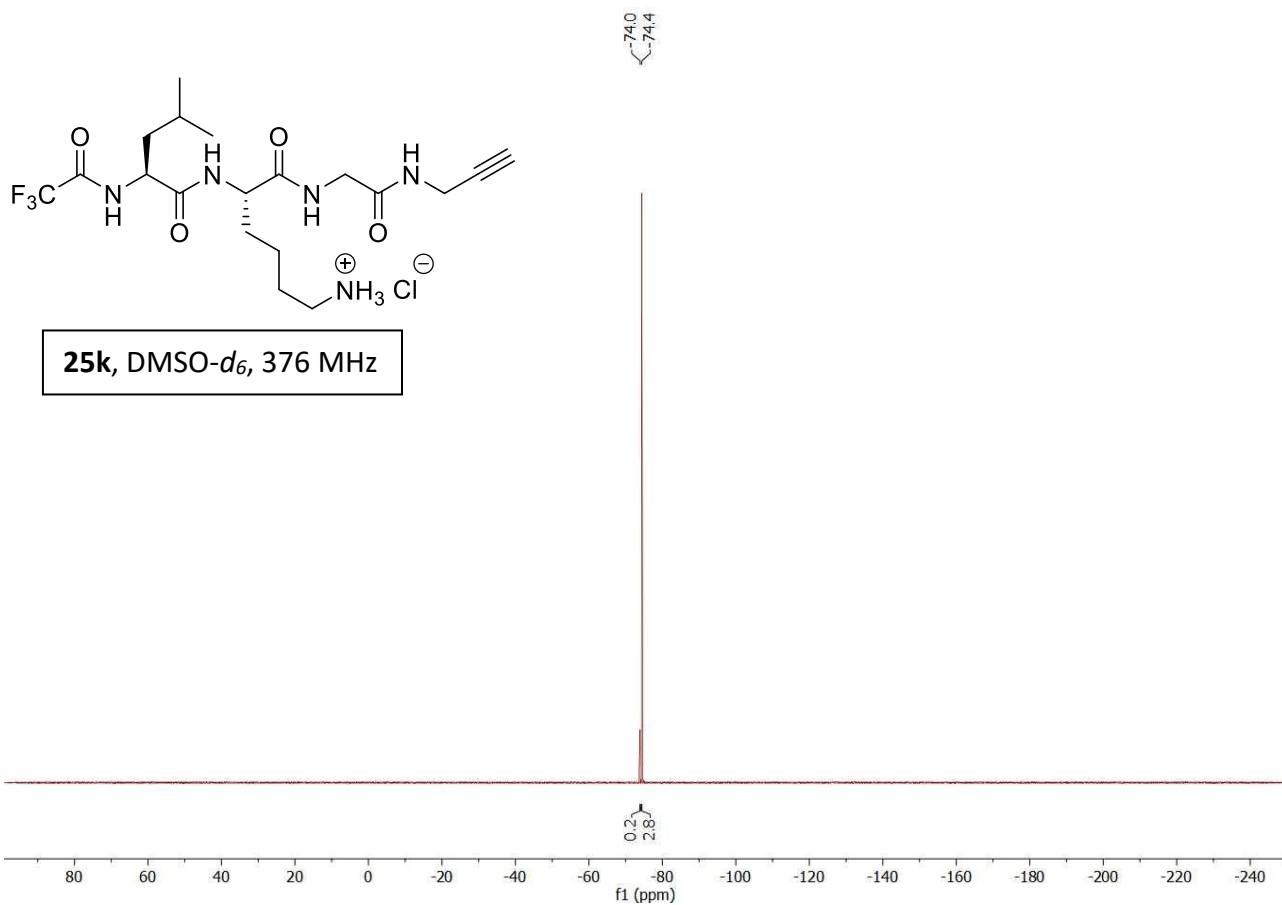

Compound **25b**

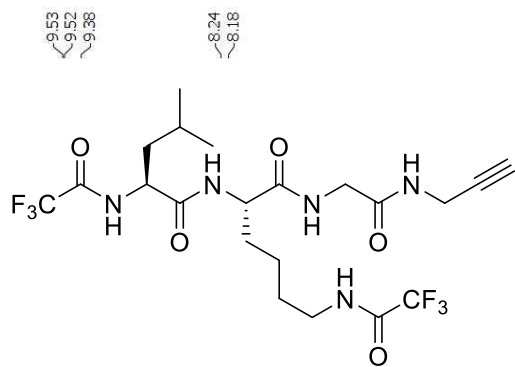

**25b**, DMSO-*d*<sub>6</sub>, 600 MHz

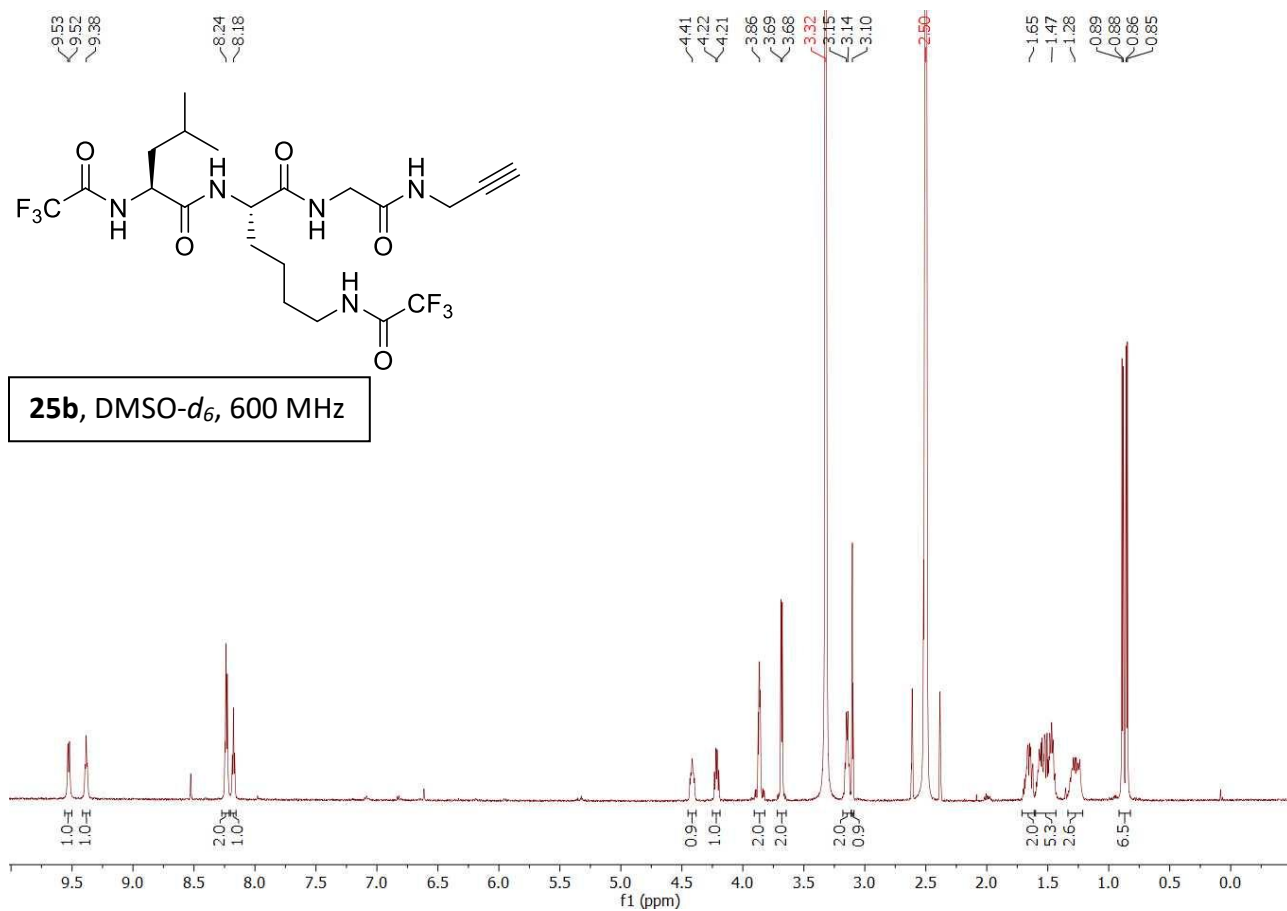

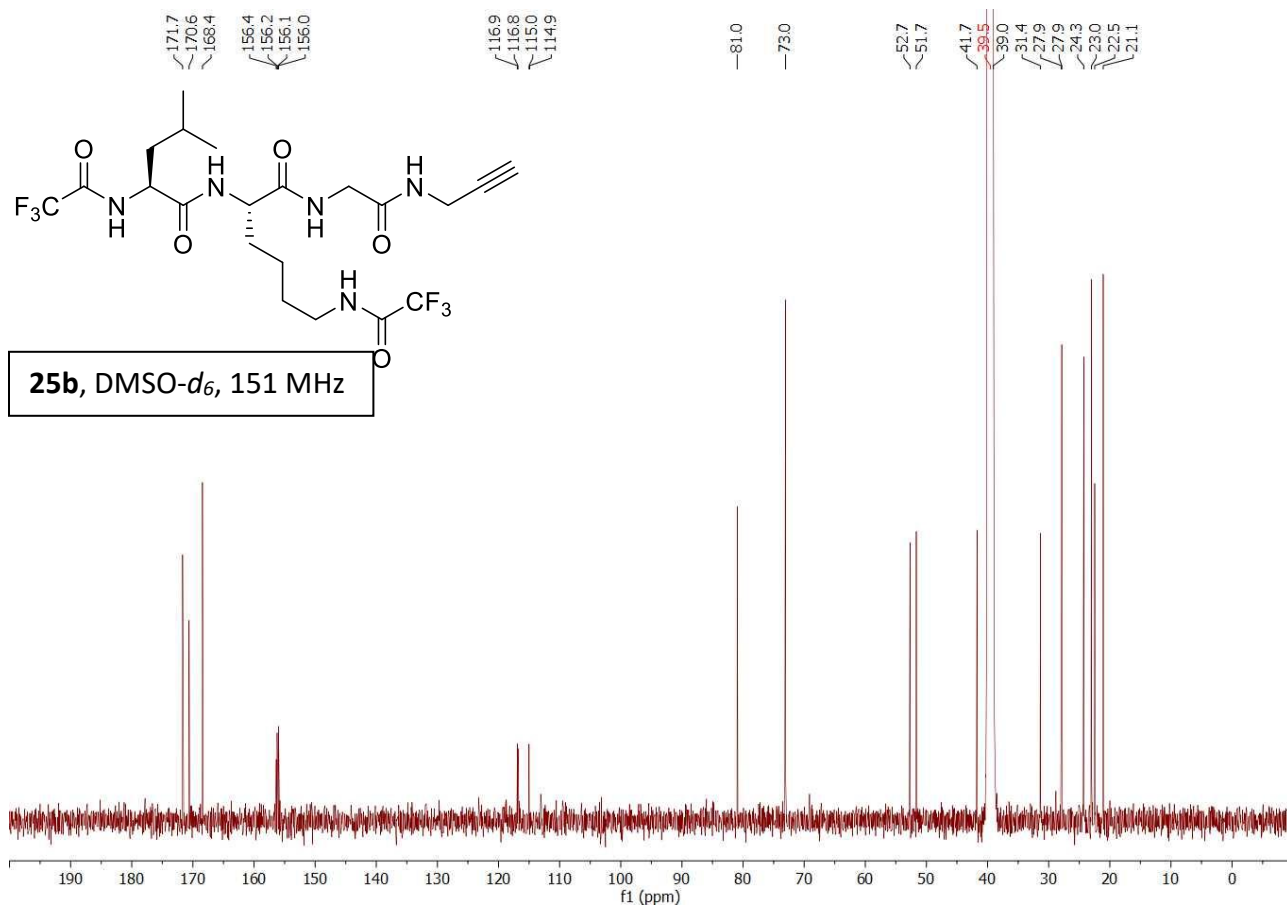

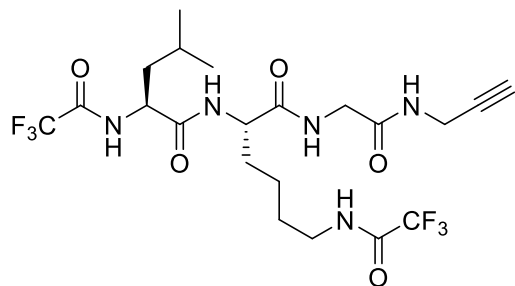

**25b**, DMSO-*d*<sub>6</sub>, 565 MHz

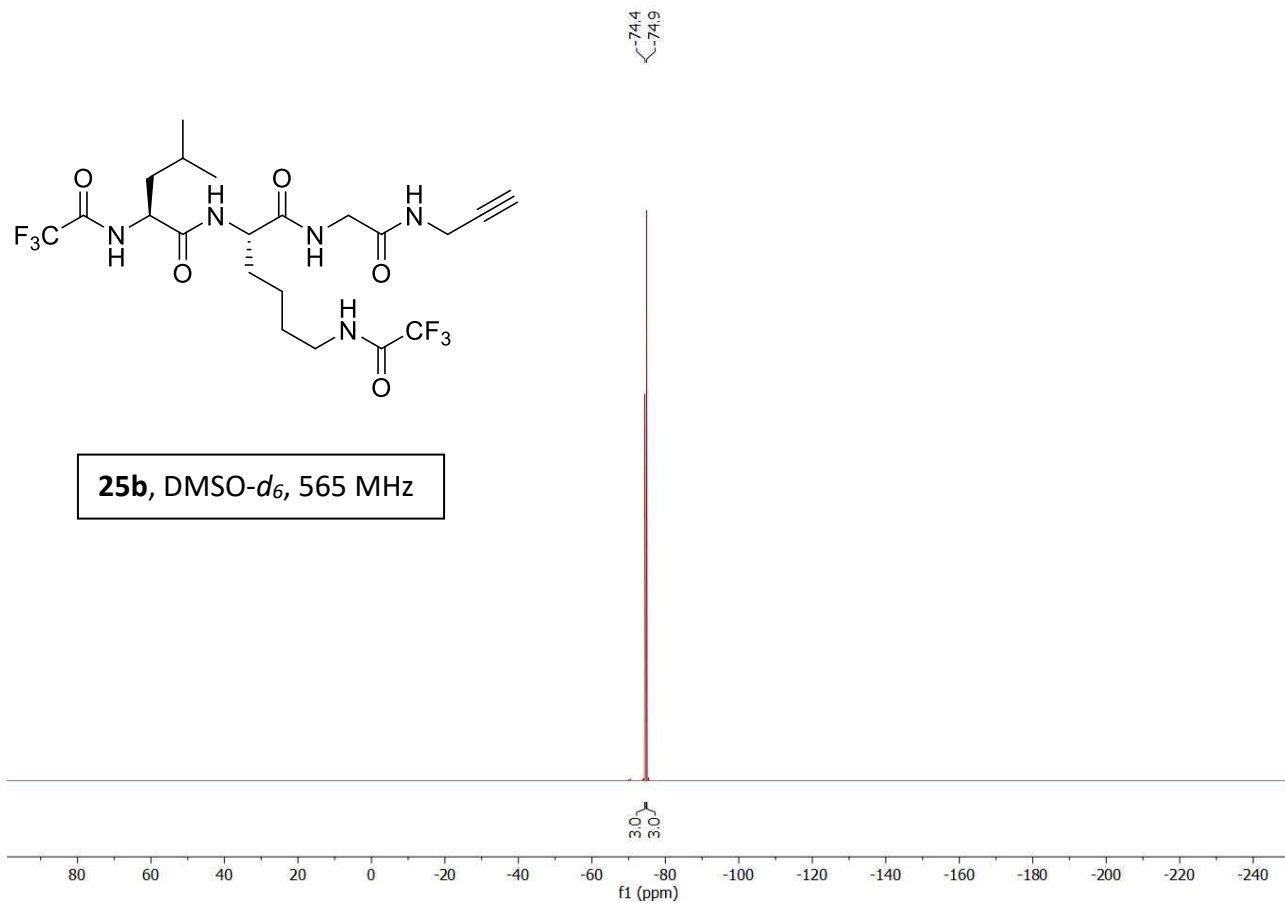

**Compound 31**

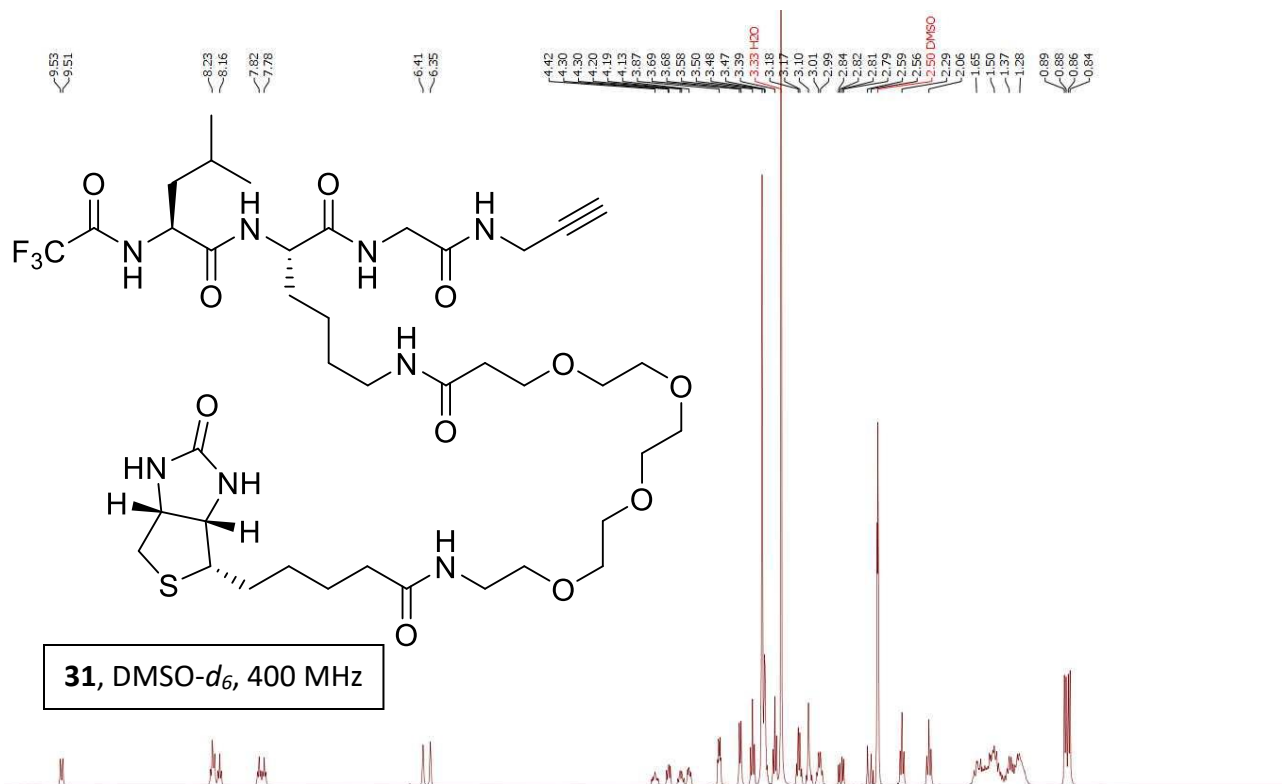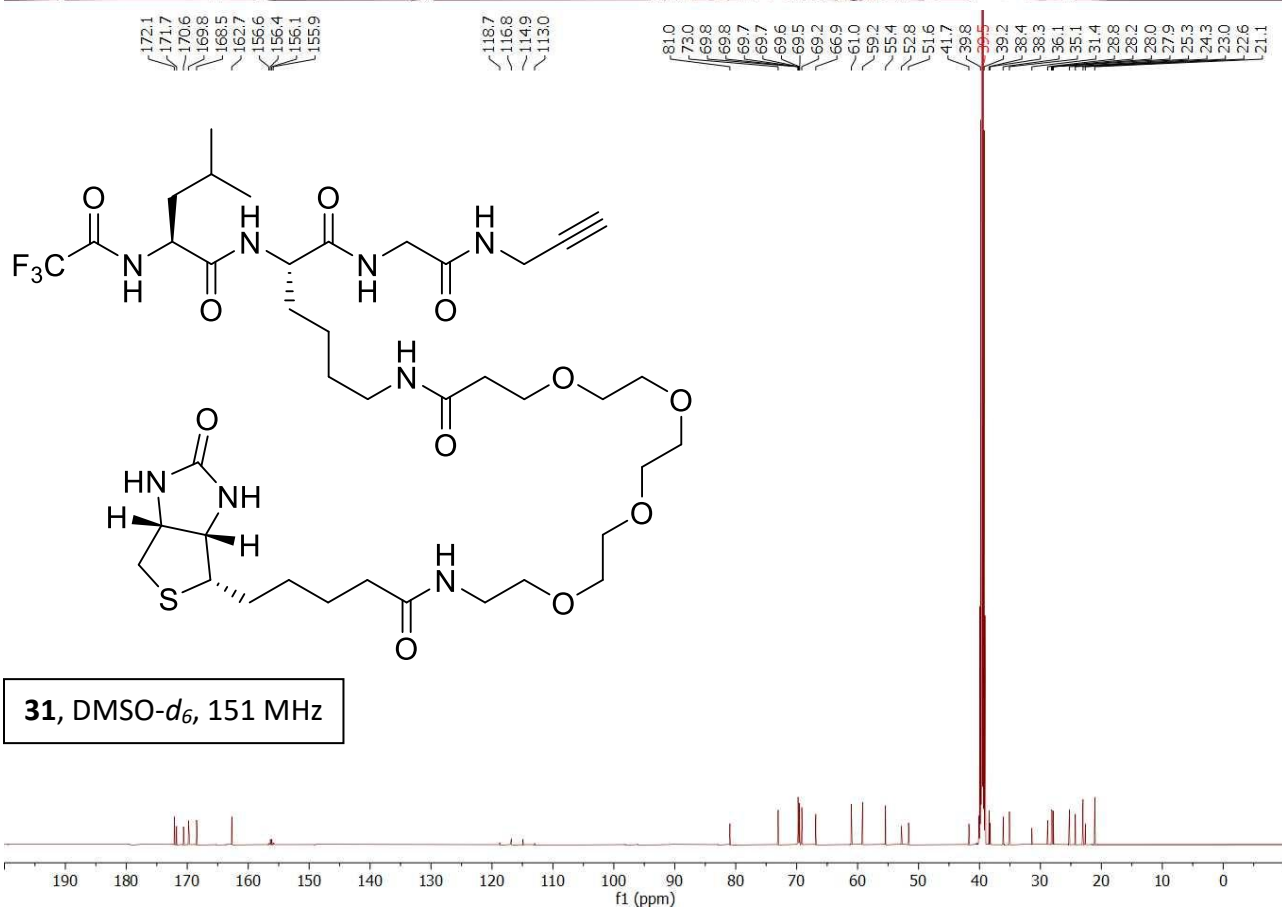

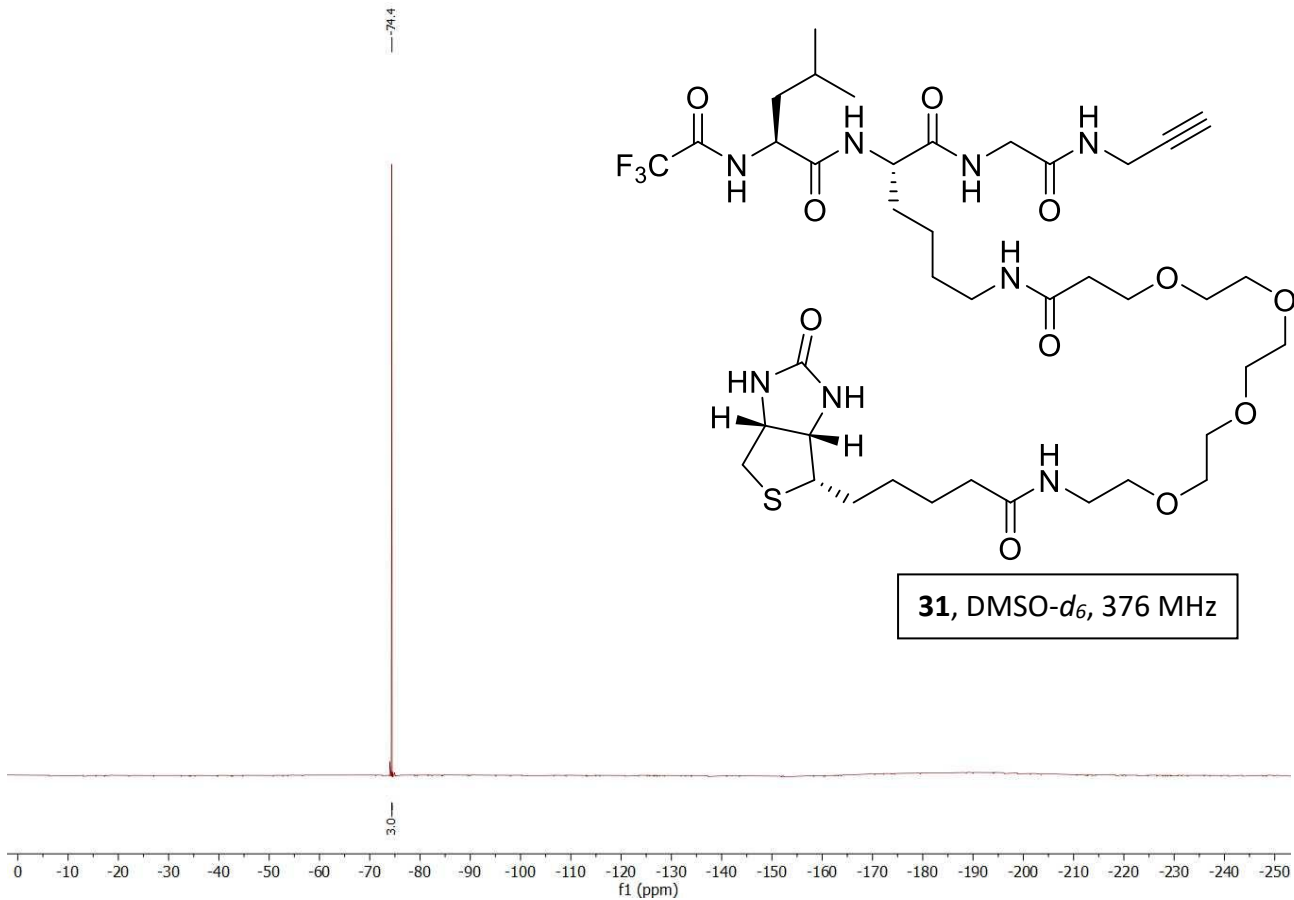

**Compound 32**

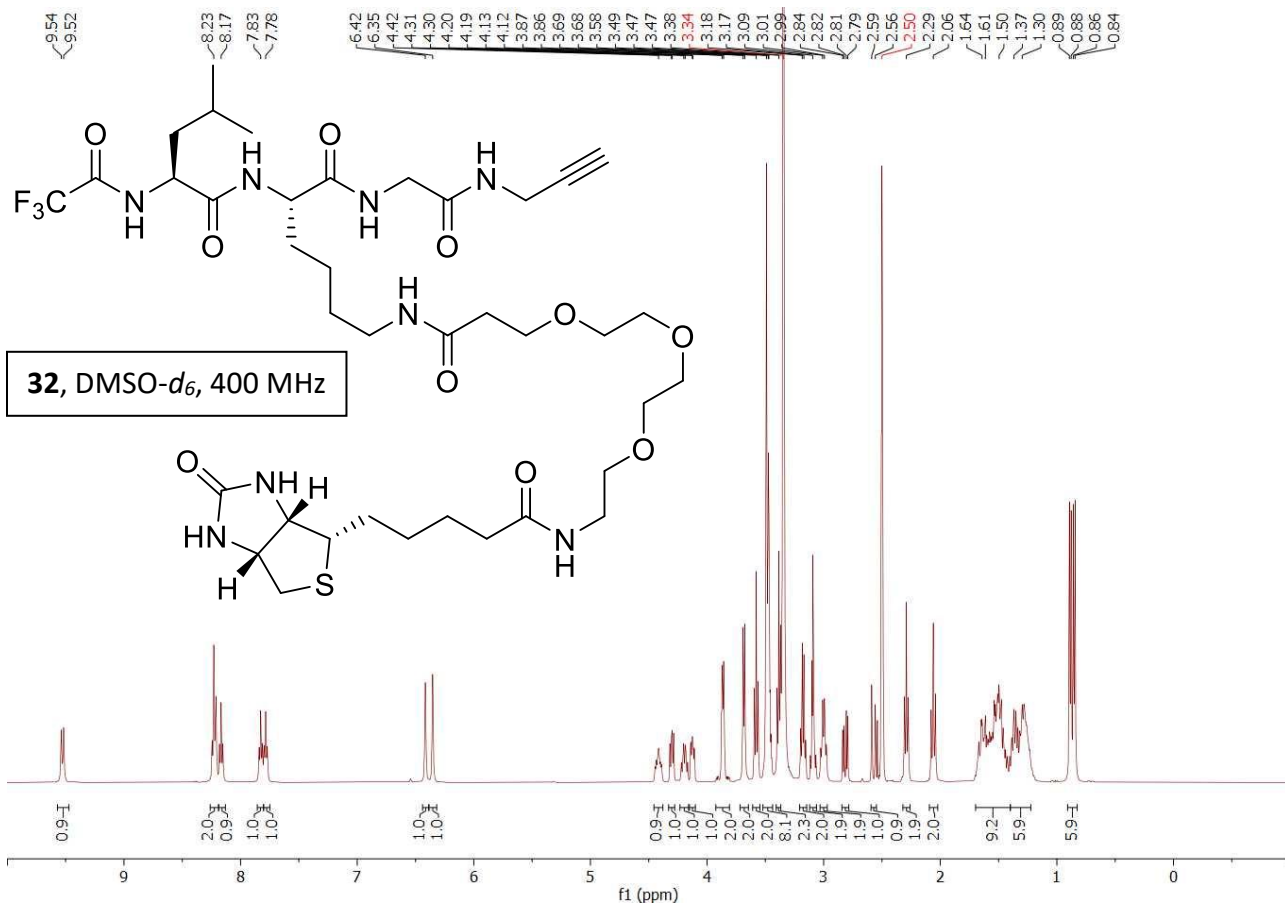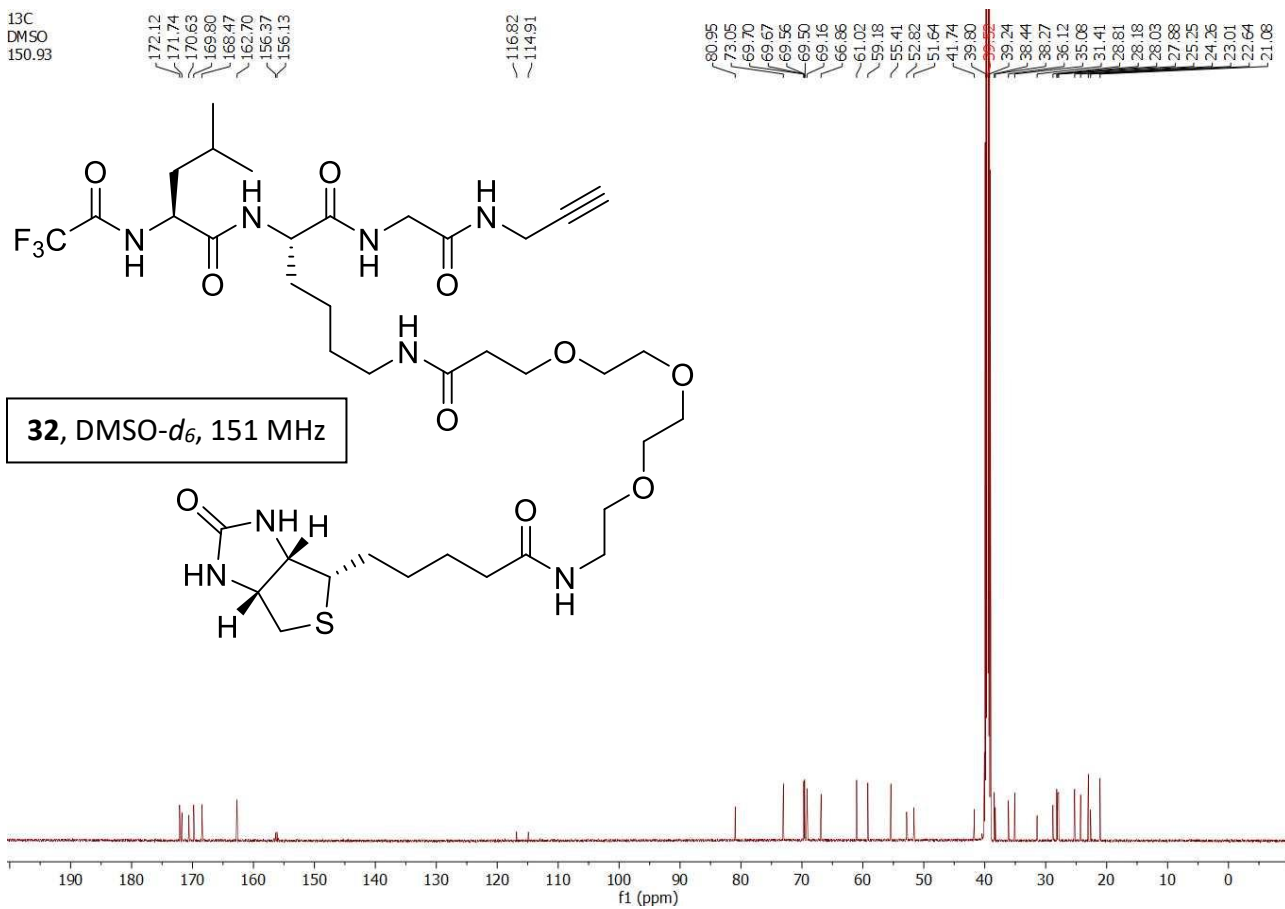

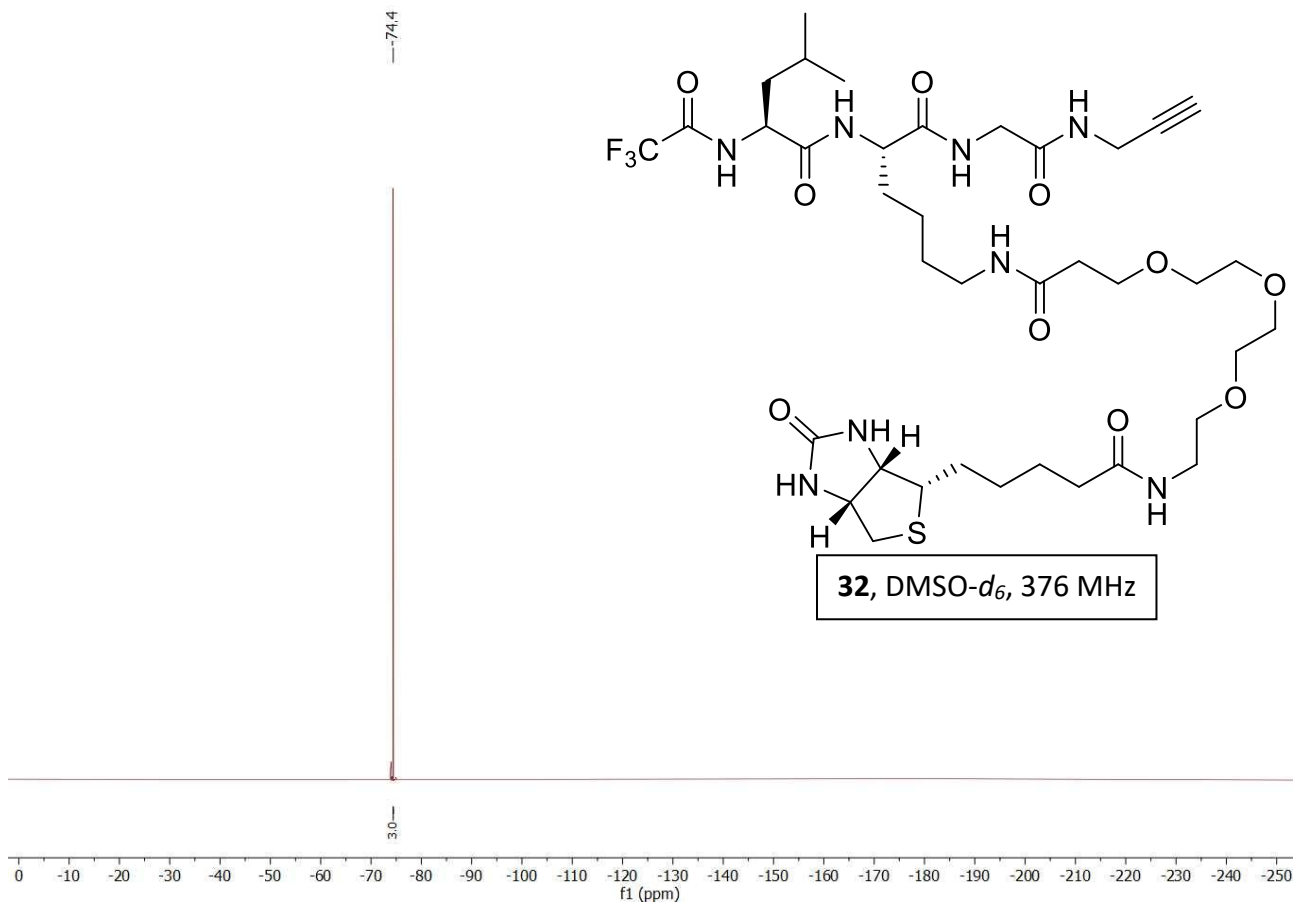

**Compound 33**





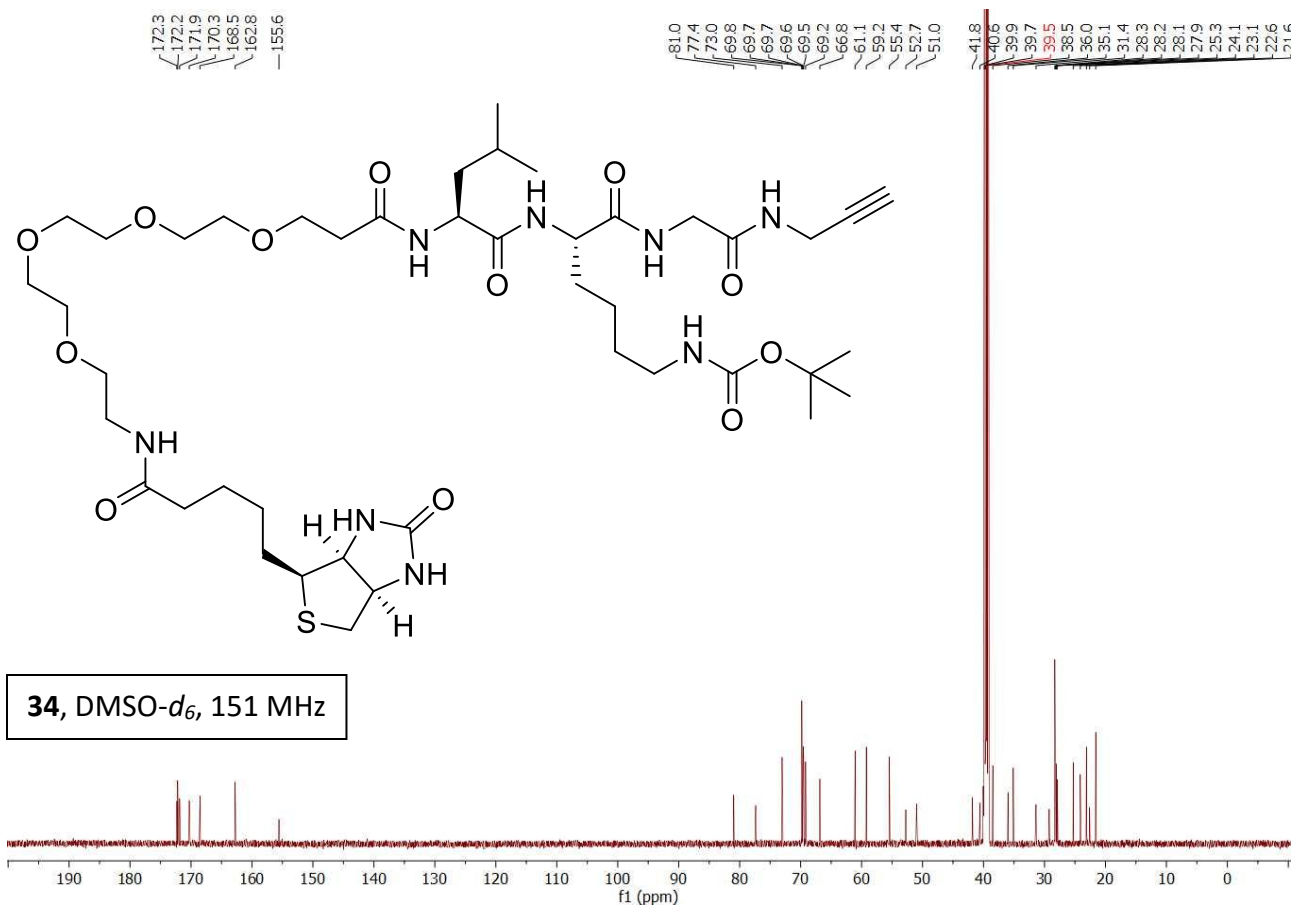

**Compound 35**

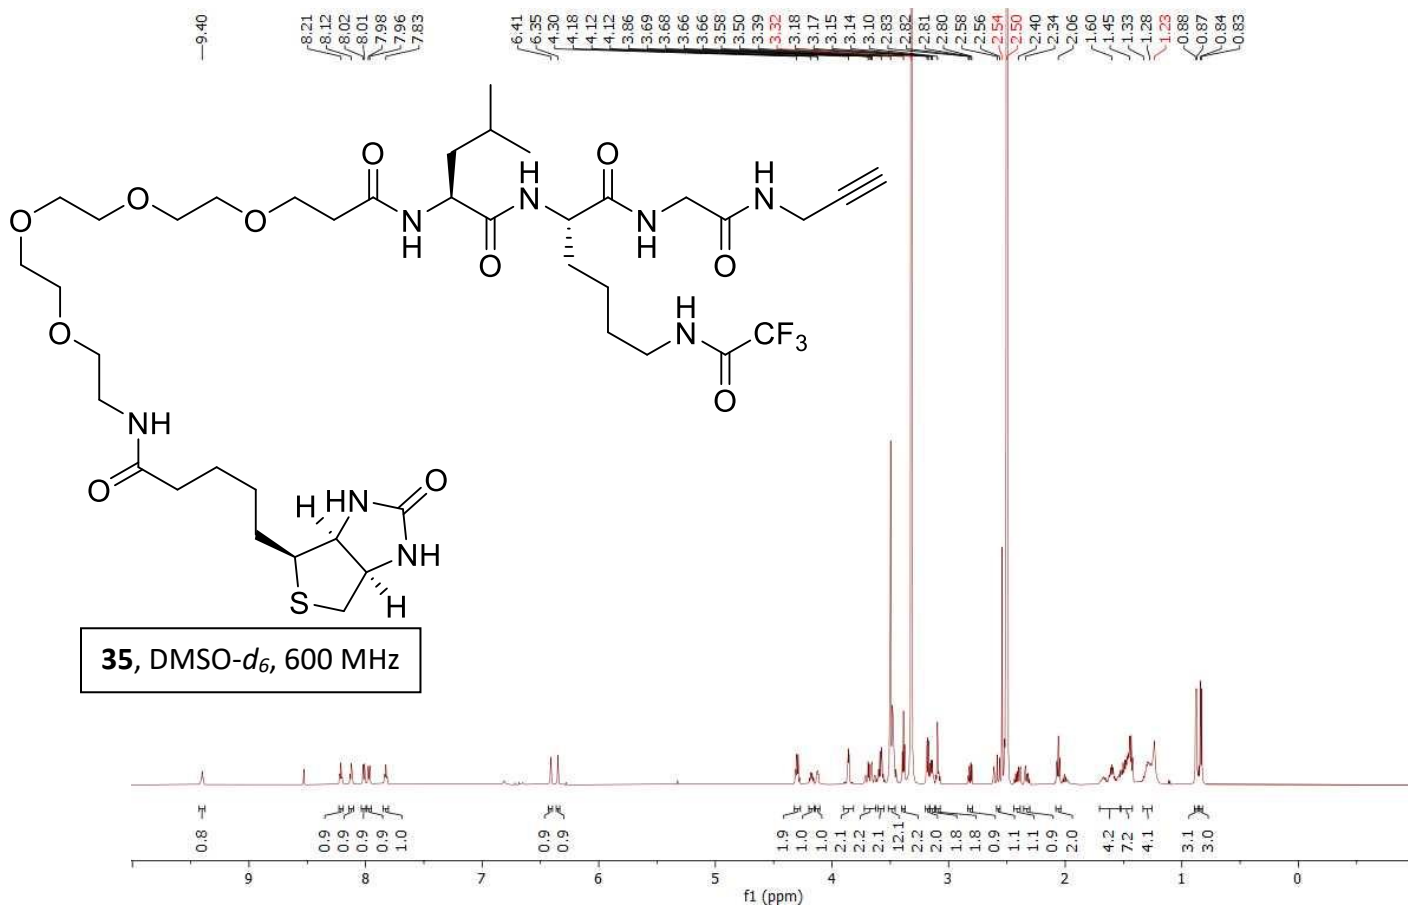

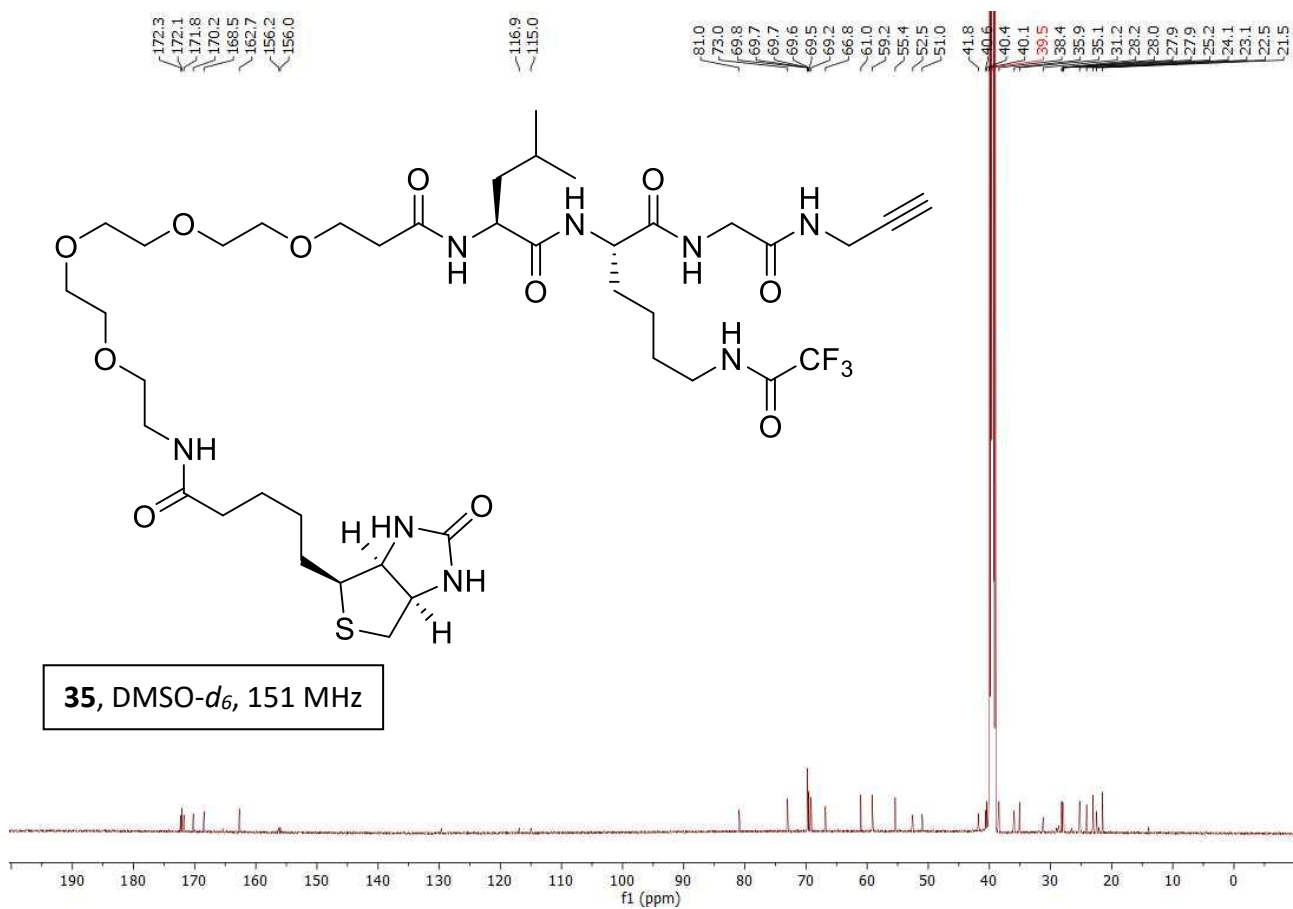

-74.37

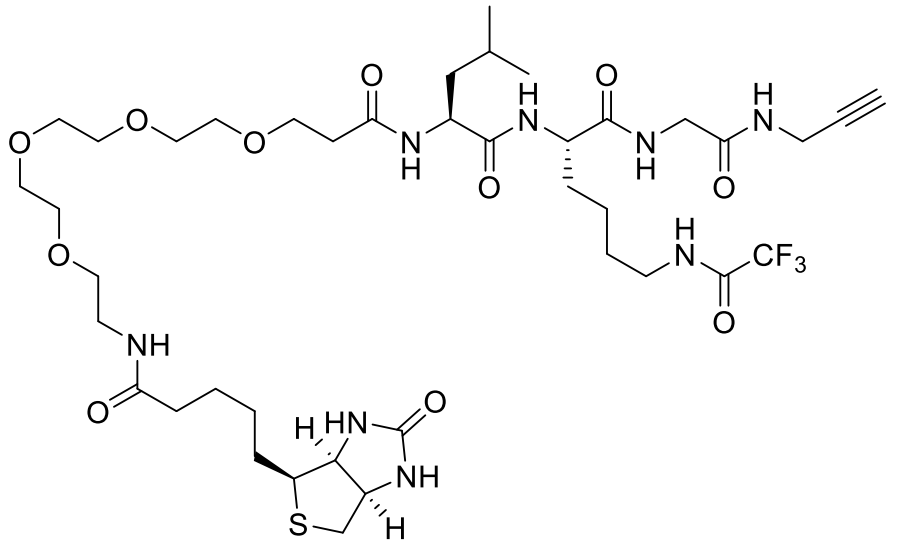

35, DMSO-*d*<sub>6</sub>, 565 MHz

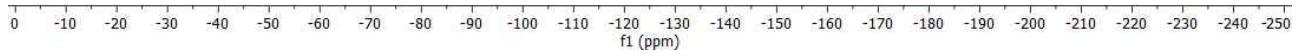

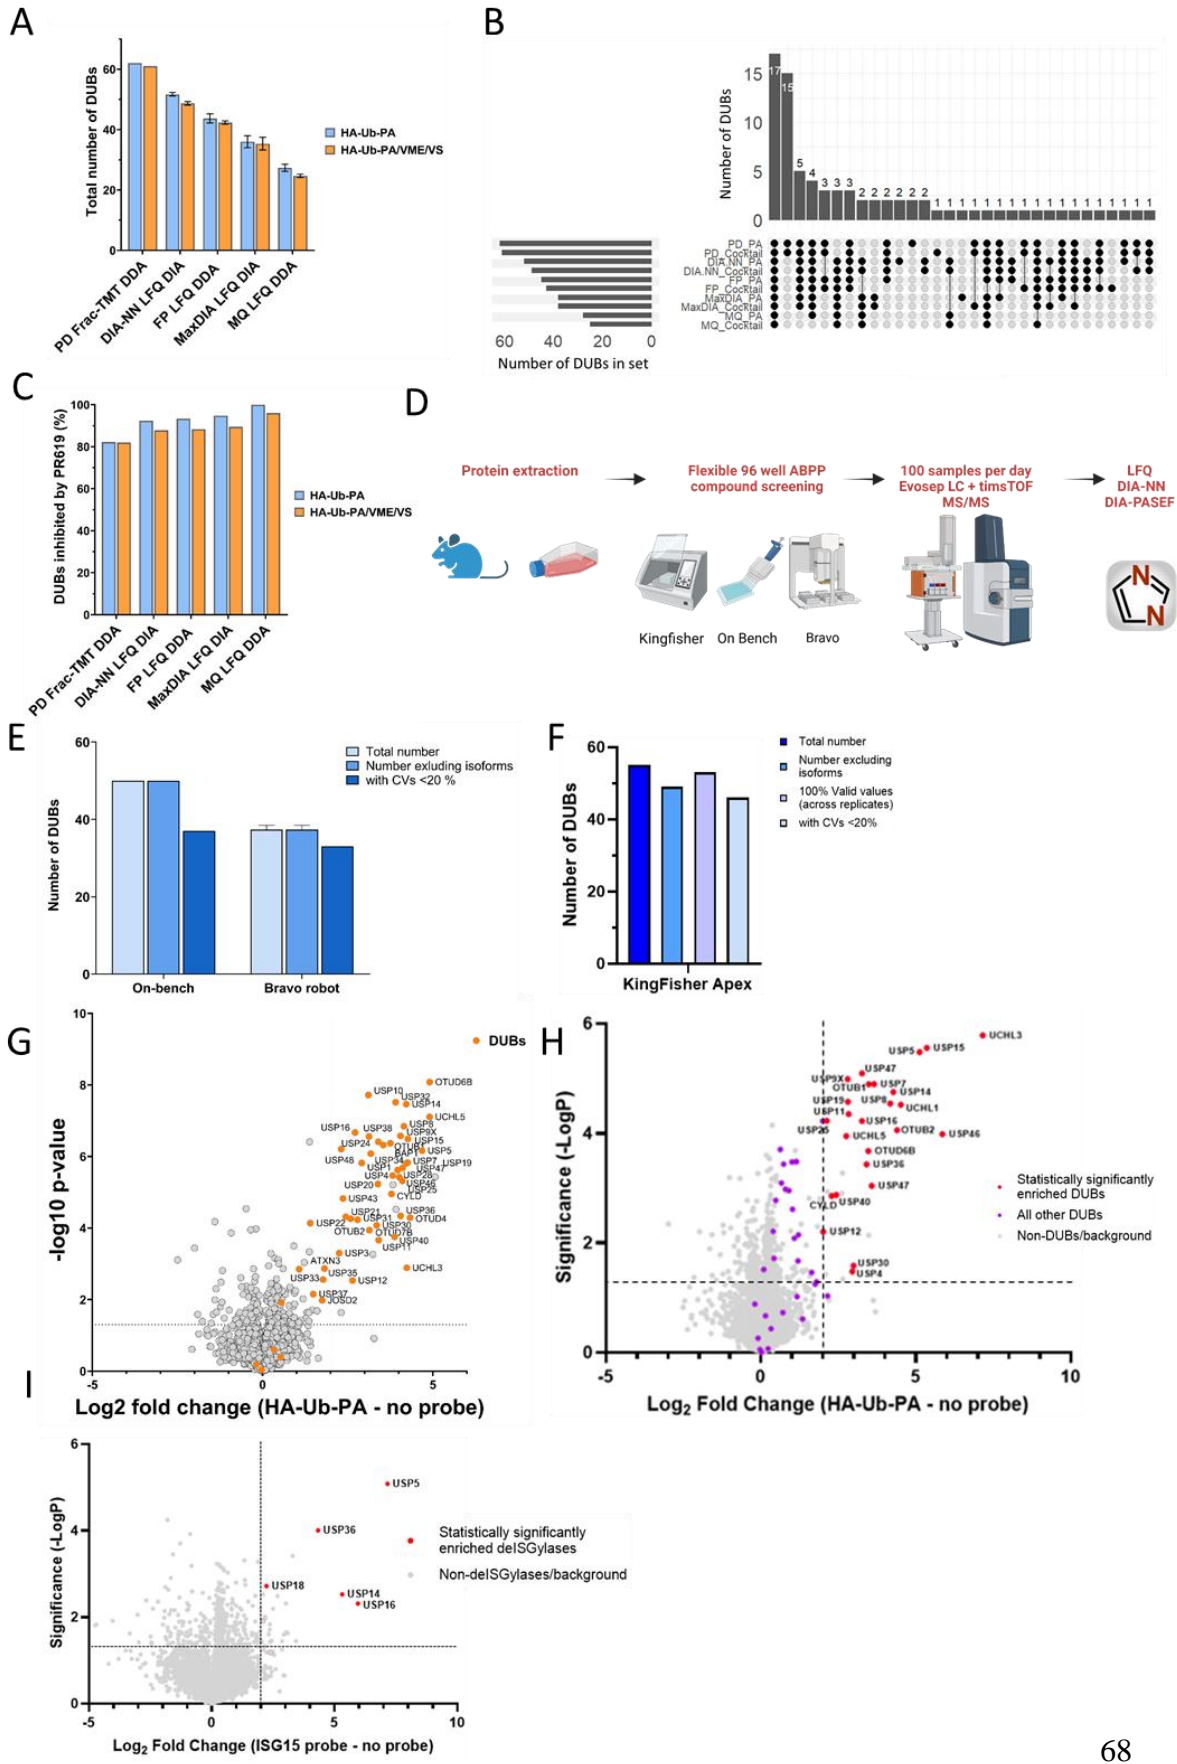

**Figure S1.** ABPP optimisation and flexibility. (A) Comparison of the total number of DUBs, including isoforms, identified in MCF-7 lysates by ABPP from in-depth ABPP workflows with either HA-Ub-PA ABP or a cocktail of ABPs (HA-Ub-PA/VME/VS). DDA = Data-dependent acquisition. DIA = Data independent acquisition. Frac-TMT = Fractionated ABPP samples labelled with tandem mass tags (TMT). LFQ = Label free quantitation. PD = proteome discoverer. FP = Fraggpipe. MQ = Maxquant. (B) Upset plot showing the commonality of DUBs identified from MCF-7 cell lysates in (A) by each high DUBome depth workflows. (C) Percentage of DUBs inhibited by >50% by PR619 from each by each high DUBome depth workflows shown in (A). (D) HA-Ub-PA high-throughput workflows. Created in BioRender. Jones, H. (2025) [\(License link to be inserted upon publication\)](#). DIA-PASEF = data-independent acquisition-Parallel Accumulation-Serial Fragmentation. (E) The number of cysteine-active DUBs identified from MCF-7 cell lysates by ABPP in total using the high-throughput workflows outlined in (D), with on-bench or Bravo robot 96-well immunoprecipitation (error bars = standard deviation (SD)). (F) The number of DUBs identified from HAP1 lysates using the ABPP-HT\* high-throughput workflow with KingFisher Apex 96 well automated affinity purification. (G) Volcano plot of the enrichment of DUBs identified with HA-Ub-PA ABPP-HT\* enrichment by the on-bench immunoprecipitation. (H) Volcano plot of the enrichment of DUBs from HAP1 lysates (IFN-treated) identified with HA-Ub-PA ABPP-HT\* enrichment by KingFisher Apex 96 well automated affinity purification. (I) Volcano plot of the enrichment of deISGylases from HAP1 lysates (IFN-treated) identified with bio-ISG15-PA ABPP-HT\* enrichment by KingFisher Apex 96 well automated affinity purification.



**Fig. S2.** Hit Validation and Dose-response Analyses. (A) Coefficient of variation (CV) for DUBs identified across the *ob*ABPP-HT\* screen for each of the tested compounds. Box and whiskers are at 10-90 percentile. Red dashed line: average CV for DUBs across all conditions. (B-C) HA-Ub-PA ABPP of **Compounds 25** and **27** at 25  $\mu$ M in MCF-7 cell lysates (error bars = SD). (D) Concentration-dependent binding of **Compounds 26** and **32** to USP33 in MCF-7 cell lysates. Data was obtained using with HA-Ub-PA as ABP. (E) Concentration-dependent for VCPIP1 in MCF-7 lysates and USP30 in SH-SY5Y lysates by **Compound 7** with HA-Ub-PA labelling. The observation of high-molecular weight smearing and reduced intensity of DUBs suggests that **Compound 7** might mediate DUB cross-linking. (F-H) Time-dependent incubation of MCF-7 lysates at the indicated compound concentrations using HA-Ub-PA labelling.

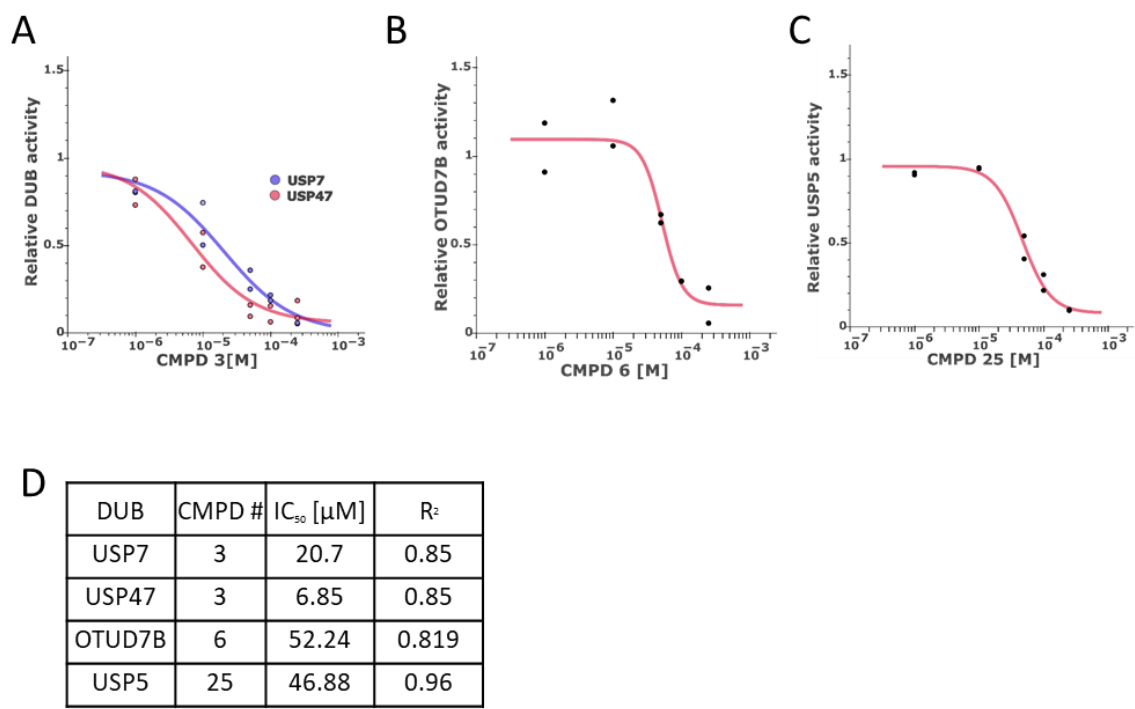

**Fig S3.** DUB Inhibitor Potency Assessment by *obABPP-HT\**. (A-C) Concentration-dependent compound binding to DUBs identified using *obABPP-HT\** with HA-Ub-PA. Data were analysed using curve curator (8). (D) IC<sub>50</sub> values obtained using curve curator from the curves shown in A-C.

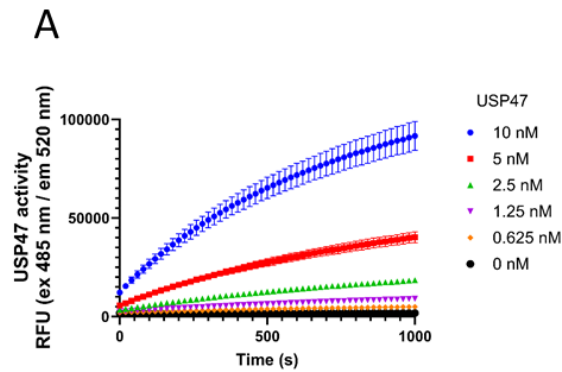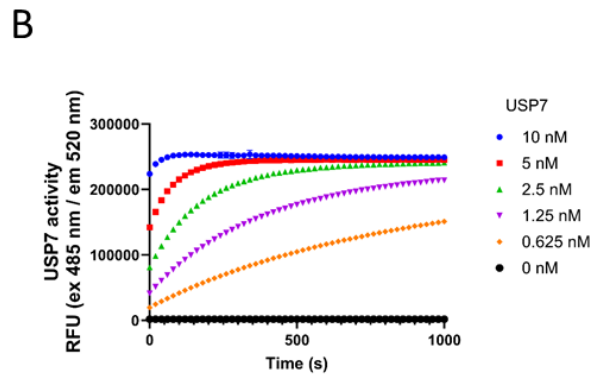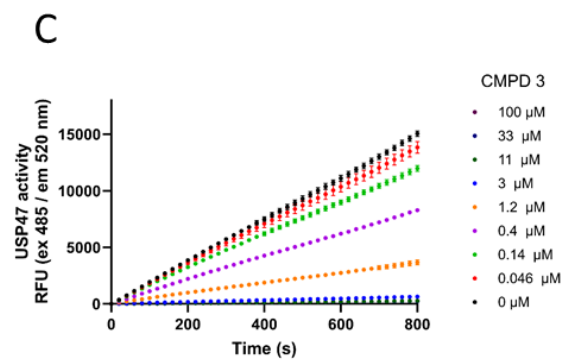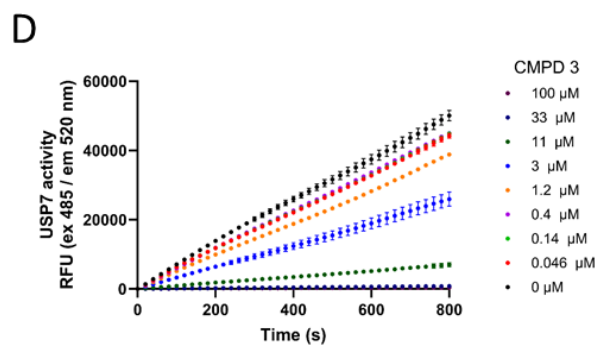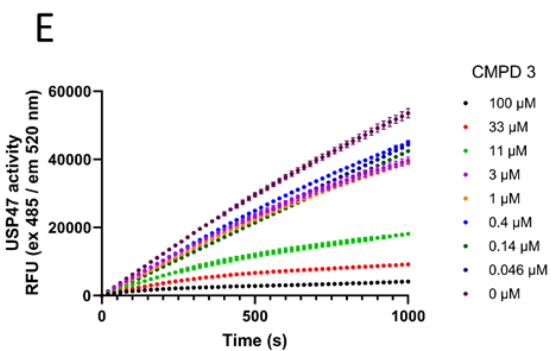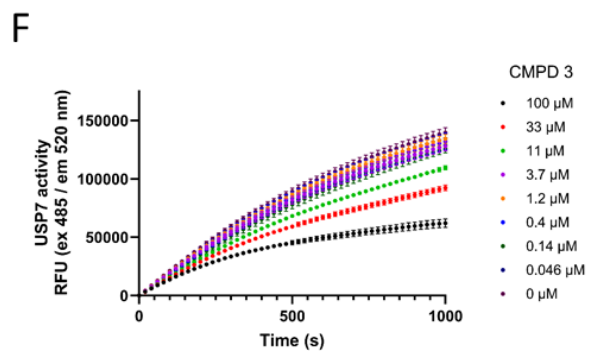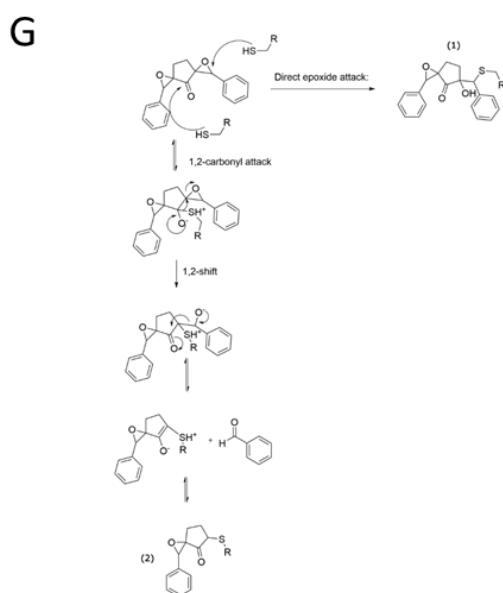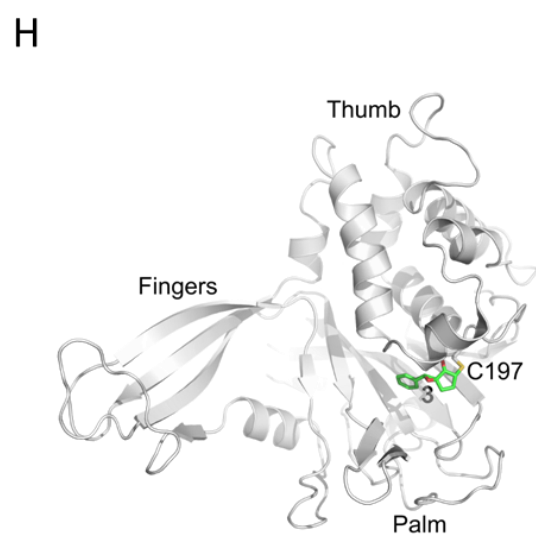

I

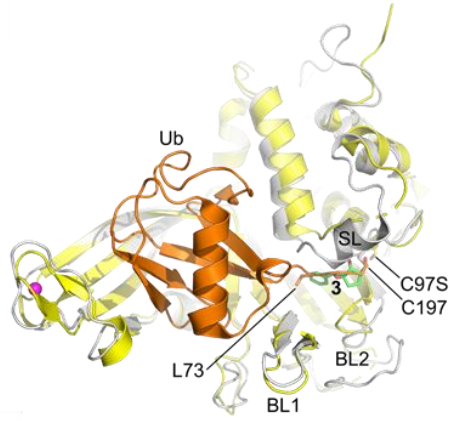

J

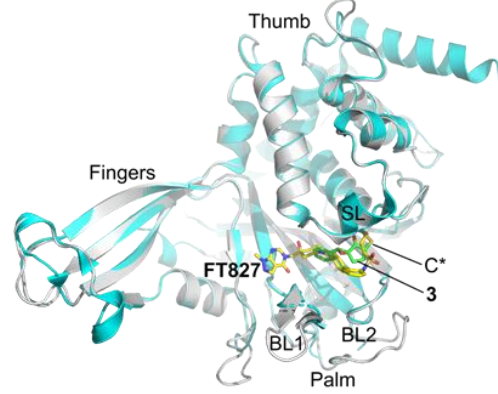

K

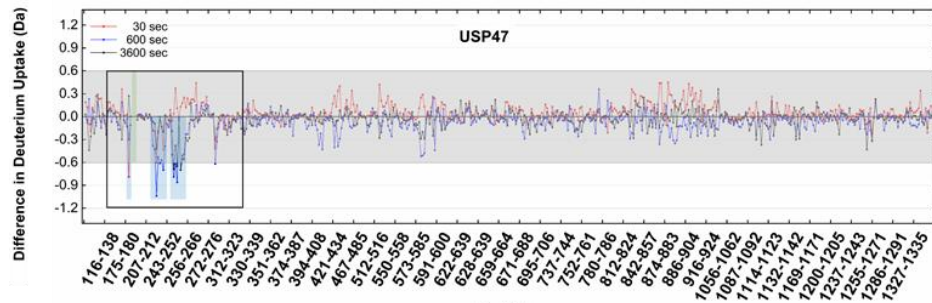

L

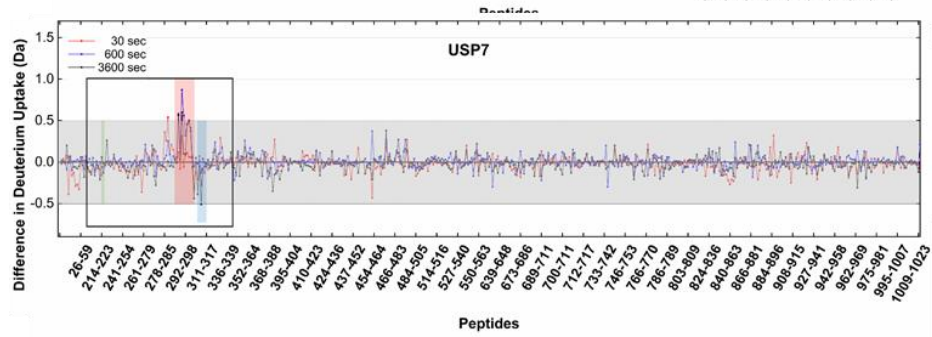

M

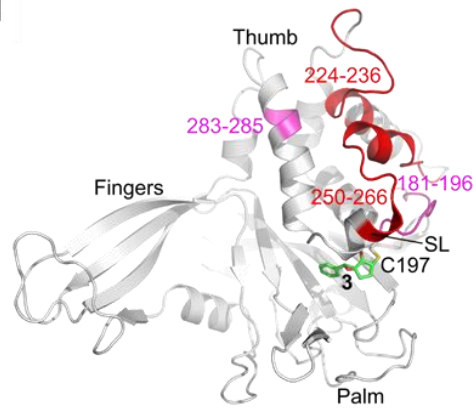

N

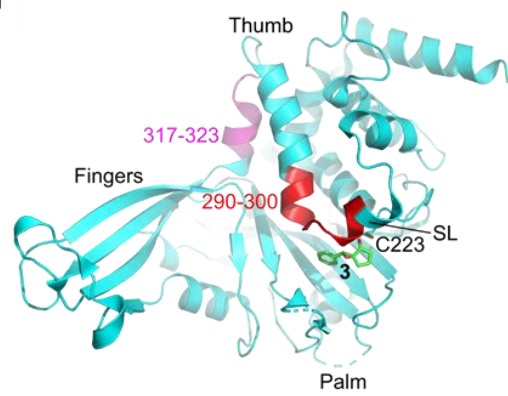

O

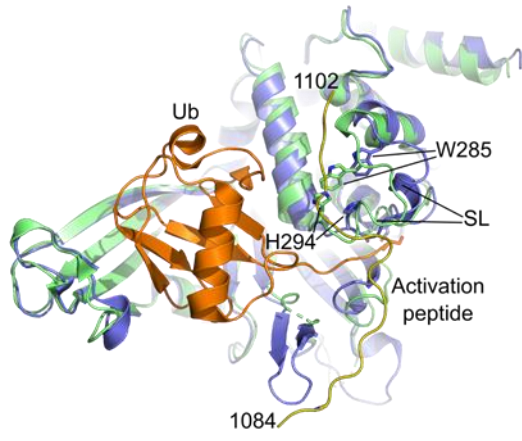

P

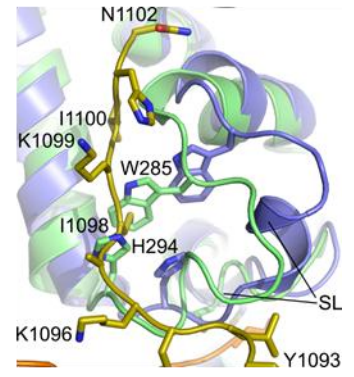

**Fig S4.** Proposed molecular Basis for Selective Inhibition of USP47 by Compound 3. (A-B) Progress curves showing (A) USP47- and (B) USP7-catalysed hydrolysis of Ub-Rho over time (error bars represent SD N=3). (C-D) Progress curves showing (C) USP47- and (D) USP7-catalysed hydrolysis of Ub-Rho in the presence of varying concentrations of **Compound 3**, following preincubation of USP47 or USP7 with **Compound 3** for 30 min (error bars: standard error of the mean, SEM, N=3). (E-F) Progress curves showing (E) USP47 and (F) USP7-catalysed hydrolysis of Ub-Rho in the presence of varying concentrations of **Compound 3**, without preincubation (error bars: SEM, N=3). (G) Proposed outline mechanism for covalent reaction of **Compound 3** with the catalytic cysteine C197 of human USP47. At least two mechanisms for the reaction of **Compound 3** with the nucleophilic cysteine are plausible, with the reaction proceeding via 1,2-carbonyl attack and retro-aldol fragmentation to form (2) possibly being the most probable based on previous observations using a related diepoxide(9). (H) Modelled structure of human USP47 in complex with **Compound 3** shown as a stick representation with carbon atoms colored green. The thumb, palm and fingers subdomains of the catalytic domain and the catalytic cysteine, Cys197, are highlighted. The figure was prepared using PyMOL (The PyMOL Molecular Graphics System, version 2.5.8; Schrödinger, LLC). (I) Superimposition of a modelled structure of human USP47 in complex with **Compound 3** based on the X-ray structure of *C.elegans* USP47 in complex with ubiquitin (PDB code: 8ITP(10)). The thumb, palm and fingers subdomains, the *C. elegans* USP47 catalytic cysteine point mutation (C97S), and the catalytic cysteine in the human USP47 model (Cys197) are highlighted. The catalytic domain of the modelled structure of human USP47 in complex with **Compound 3** is colored grey, and **Compound 3** carbons are colored green. The catalytic domain of *C. elegans* USP47 in complex with Ub is colored yellow with Ub in orange. **Compound 3** is predicted to bind in the thumb-palm cleft that is reported to guide the ubiquitin C-terminus into the active site. The positions of BL1, (BL2), and SL are highlighted. (J) Superposition of the modelled structure of human USP47 (grey) in complex with **Compound 3** (green carbon atoms) on a X-ray structure of human USP7 (cyan) in complex with the covalently reacting inhibitor **FT827** (yellow carbon atoms; PDB code: 5NGF (11)). The thumb, palm and fingers subdomains, and positions of blocking loops 1 and 2 (BL1, BL2) and switching loop (SL) are highlighted. C\* denotes the nucleophilic cysteine (corresponding to C197 in human USP47 and C223 in human USP7). **Compound 3** is predicted to bind within the thumb-palm cleft in a similar manner as **FT827** with **FT827** extending out further towards the fingers subdomain. (K-L) Differential HDX-MS analysis of USP47 and USP7 in apo- and holo-states. A total of 491 peptides covering 88% of the full-length USP47 protein sequence were identified, with an average residue redundancy of 4.2. Similarly, a total of 536 peptides covering 84% of the full-length USP7 sequence were identified, with an average residue redundancy of 5.9. Residual  $\Delta$ HDX plots showing differences in deuterium uptake between holo- and apo- states for USP47 (K) and USP7 (L), across all mapped peptide fragments and time points (30 s to 1 h). Positive  $\Delta$ HDX values indicate increased solvent exposure or flexibility in the presence of **Compound 3**, whilst negative values suggest protection or structural stabilisation. A grey shaded area marks the significance threshold for  $\Delta$ HDX applied in each study. (M) Modelled structure of human USP47 in complex with **Compound 3** (carbon atoms in green) highlighting regions identified in the HDX-MS analysis colored red (mean perturbation over 60 min of 5–20%) and magenta (mean perturbation over 60 min of <60%). The thumb, palm and fingers subdomains, catalytic cysteine (C197), and SL are labelled (N) Human USP7 catalytic domain (from PDB code: 5NGF(11)) colored cyan with the superimposed modelled position of **Compound 3** in human USP47 (green carbon atoms) highlighting regions identified in the HDX-MS analysis colored red (mean perturbation over 60 min of 5–20%) and magenta (mean perturbation over 60 min of <60%). The thumb, palm and fingers subdomains, catalytic cysteine (C223), and SL are labelled. (O) Structure of apo-form human USP7 catalytic domain (PDB code: 1NB8(12); lime) superimposed with a structure of the human USP7 catalytic domain from the USP7-catalytic domain-UBL45-ubiquitin complex (PDB code: 5JTV(13); catalytic domain in violet, the C-terminal activation peptide in gold and ubiquitin in orange). The 19-residue activation peptide at the C-terminus of full length human USP7 stabilizes the SL (especially H294 and W285) in an active “out” conformation. (P) Close-up view of (O) highlighting the conformational shift in SL between the inactive “in” conformation in apoform USP7 and active “out” conformation in its complex with ubiquitin.

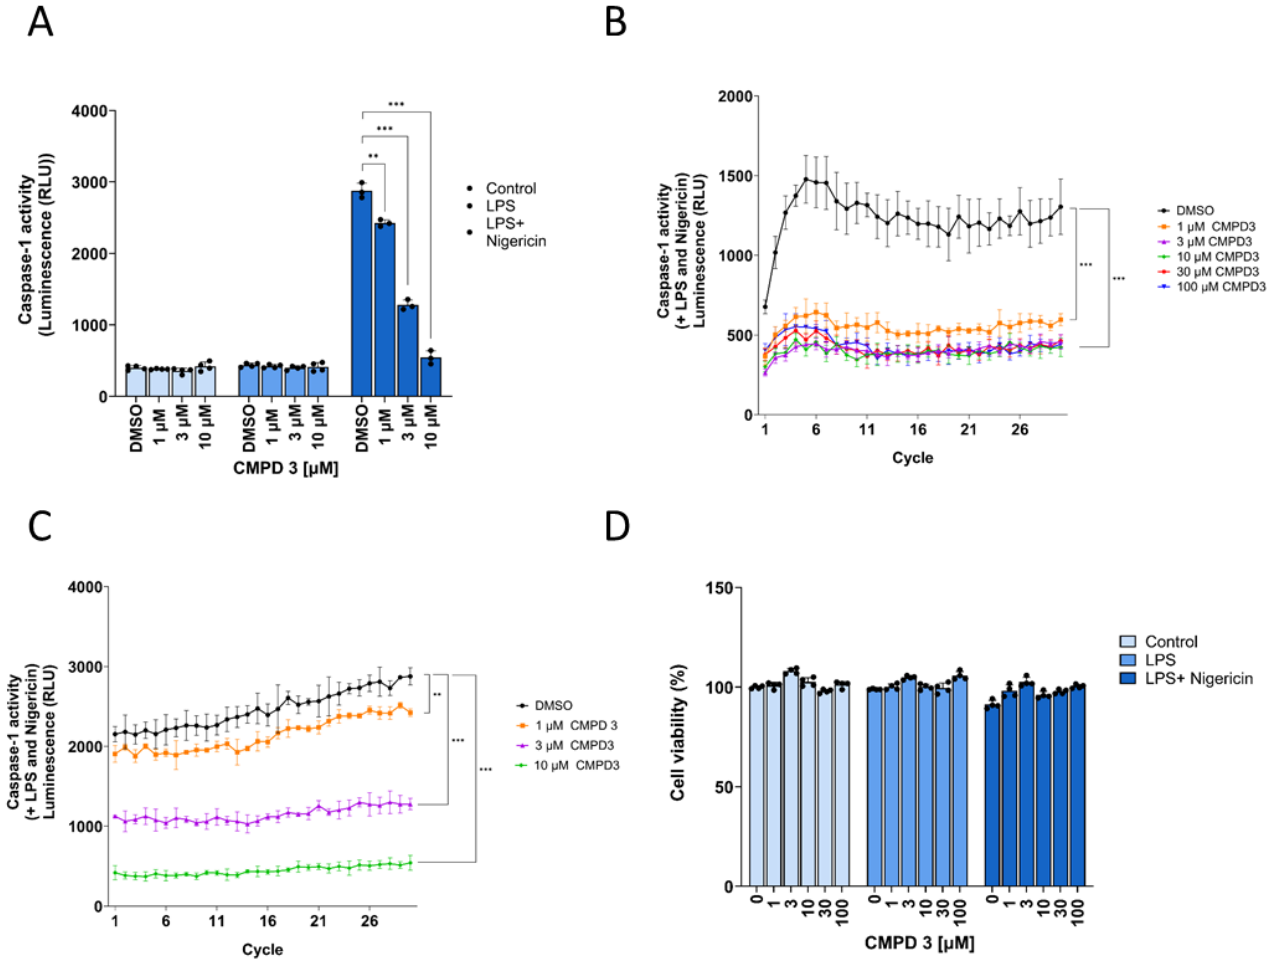

**Fig S5. Compound 3 inflammasome activation and toxicity.** (A) Caspase-1 activity in the media (supernatant) of PMA-differentiated THP-1 cells treated with the indicated concentrations of **Compound 3**, determined using the commercial Caspase-Glo 1 luminescence assay. **Compound 3** incubation for 4 h,  $\pm$  1  $\mu$ M LPS incubation for 4 h, and 10  $\mu$ M Nigericin incubation for 2 h (error bars = SD, N=4). (B-C) Caspase-1 activity over time in the media (supernatant) of PMA-differentiated THP-1 cells treated with the indicated concentrations of **Compound 3**, determined using the Caspase-Glo 1 luminescence assay. **Compound 3** incubation for 4 h, 1  $\mu$ M LPS incubation for 4 h, and 10  $\mu$ M Nigericin incubation for 45 min (B) and 2 h (C) (error bars: standard deviation, SD, (B N=4) (C N=3)). Two-way ANOVA with Dunn's multiple comparison test was used. \*\*\*P < 0.001. (D) MTS cell viability of THP-1 cells treated with indicated concentrations of **Compound 3**  $\pm$  LPS or LPS/Nigericin. Compound treatment for 4 h, 1  $\mu$ M LPS treatment for 4 h, 10  $\mu$ M Nigericin treatment for 45 min (error bars = SD, N=4).

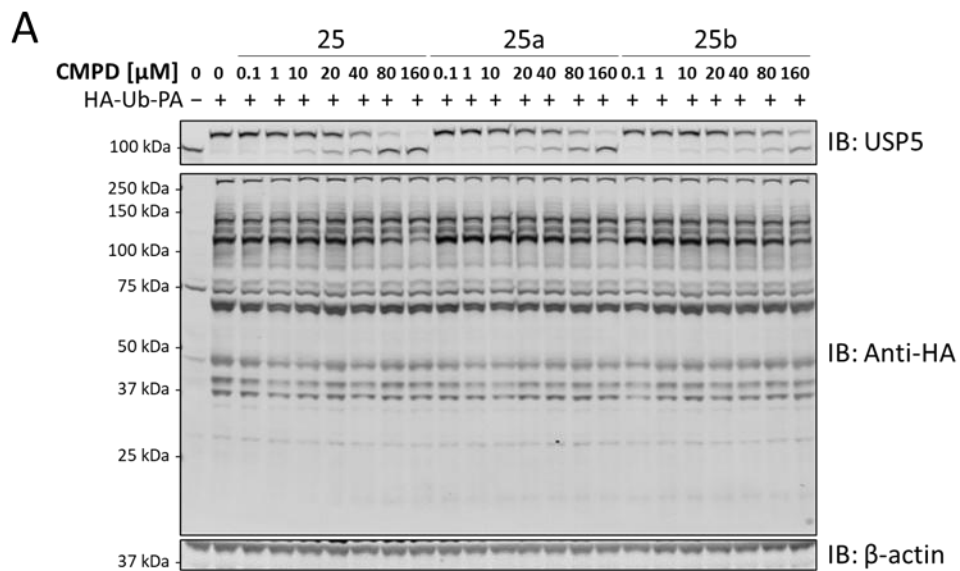

**Fig S6.** Selective inhibition of USP5 by **Compounds 25, 25a** and **25b**. HA immunoblot showing concentration-dependent selective binding of **Compounds 25, 25a** and **25b** to USP5 in MCF-7 cell lysates using HA-Ub-PA ABP.

**A**

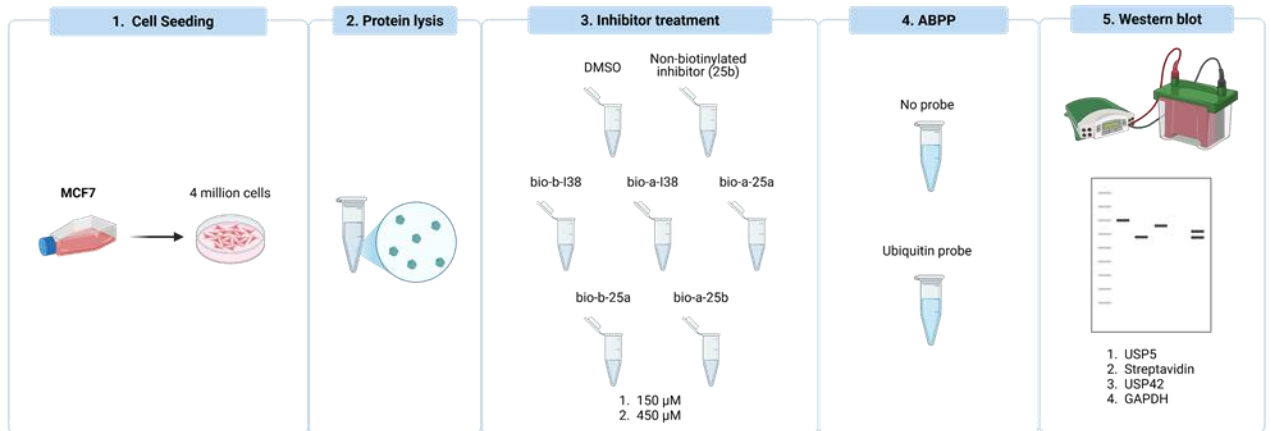

**B**

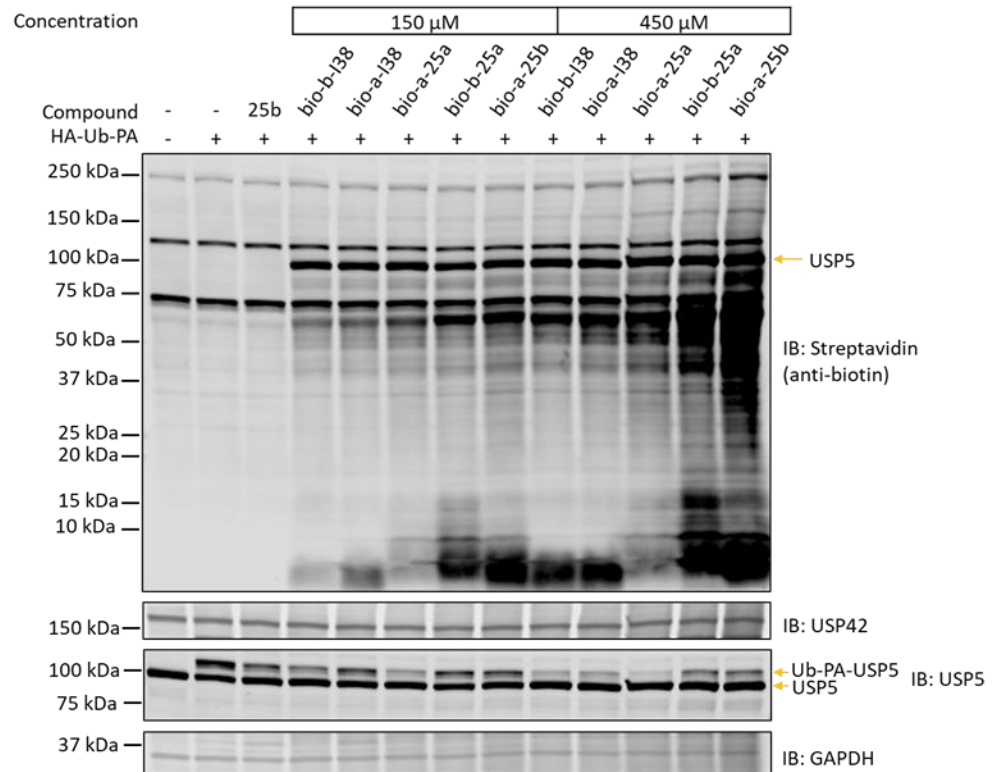

**C**

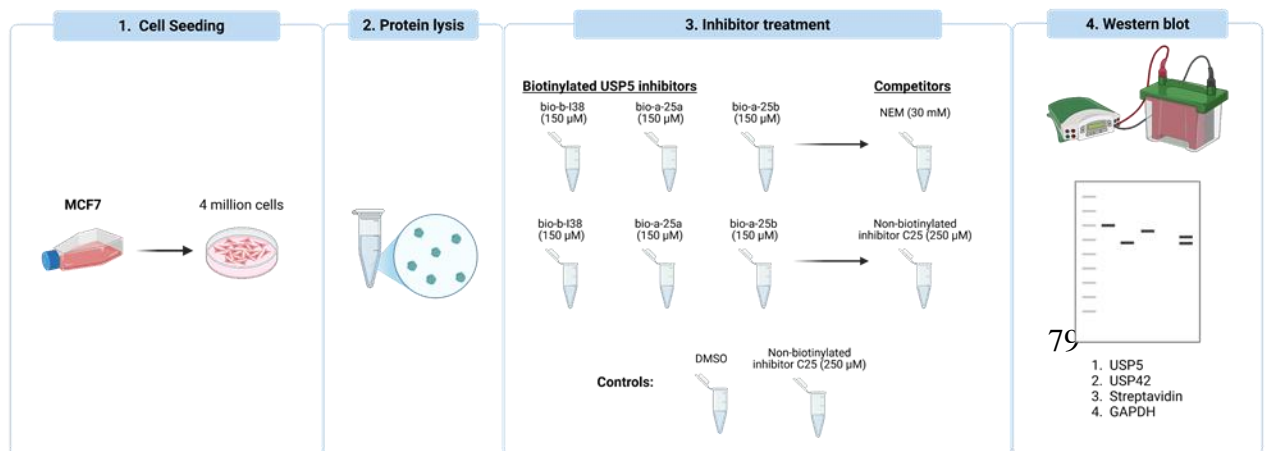

**D**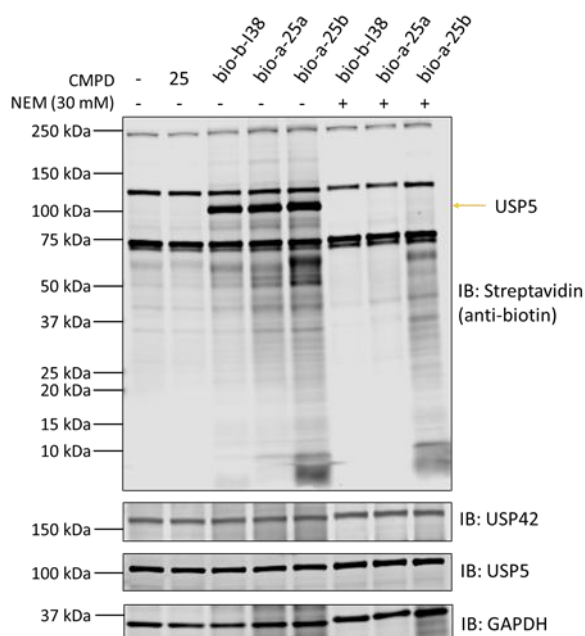

**Fig S7.** Biotinylated Compound 5 and binding to USP5 studies. (A) Experimental Workflow for ABPP (Created with BioRender.com) HA-Ub-PA ABP labelling of USP5 in MCF-7 cell lysates with biotinylated USP5 inhibitor treatments. (B) MCF-7 cell lysates were incubated with a non-biotinylated USP5 inhibitor (Compound 25b at 150  $\mu$ M), or with biotinylated USP5 inhibitors (at 150 or 450  $\mu$ M) prior to HA-Ub-PA ABP labelling. Unlabelled and probe-labelled USP5 was detected using an anti-USP5 antibody; inhibitor-labelled USP5 was detected using streptavidin (anti-biotin) immunoblotting. (C) Experimental Workflow for assessing binding of biotinylated USP5 inhibitors (Created with BioRender.com). (D) MCF-7 lysates were incubated with DMSO or 30 mM of N-ethylmaleimide (NEM) for 1 h, followed by incubation with 150  $\mu$ M of biotinylated Compound 25 derivative inhibitors for 1 h. USP5, USP42 and GAPDH were detected with immunoblotting. An anti-biotin immunoblot with streptavidin was used to visualize USP5-bound biotinylated USP5 inhibitors.

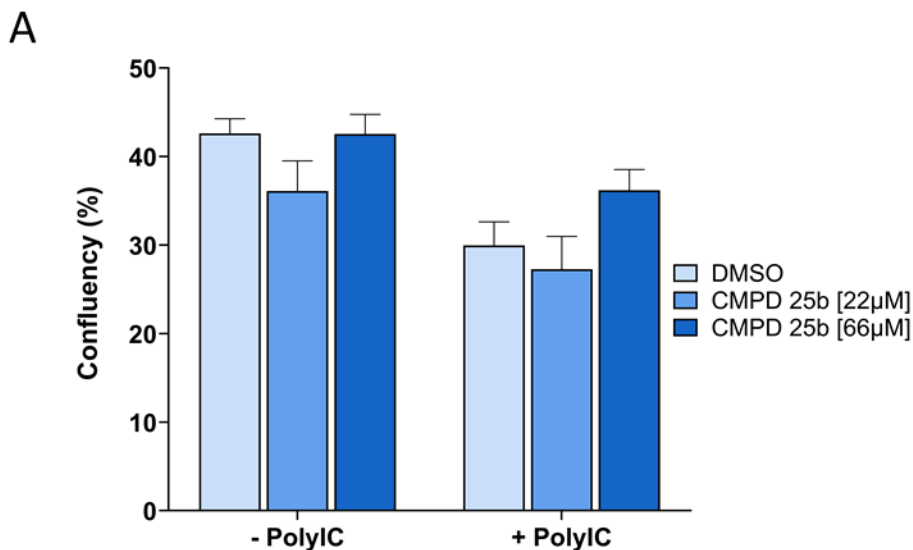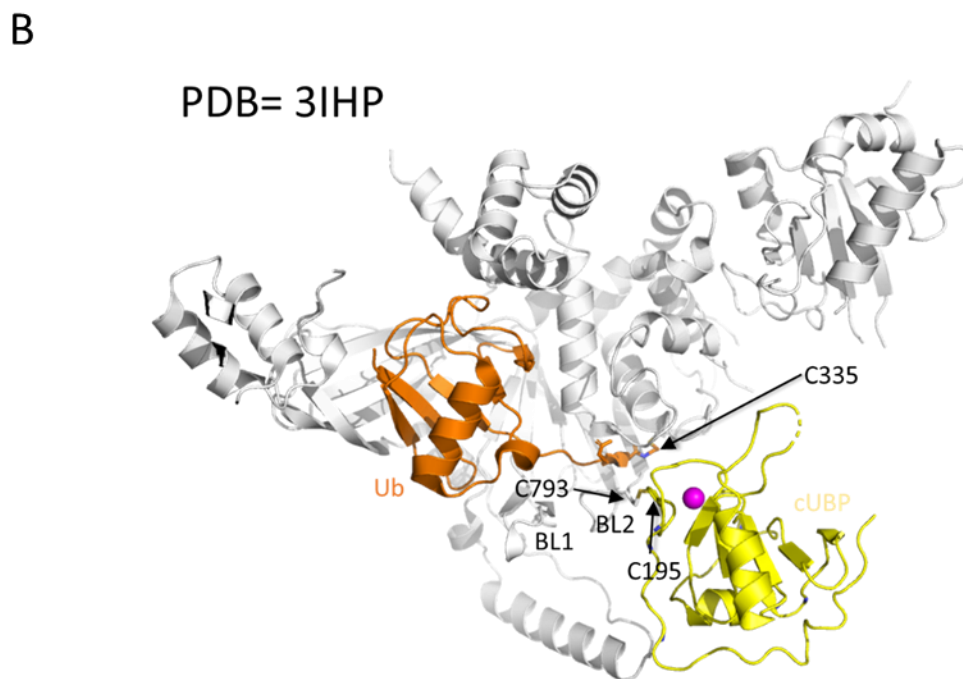

**Fig S8.** Studies on cellular toxicity and mode of action of Compound 25b. (A) HAP1 cells were seeded in triplicate at 5,000 cells per well in a 96-well plate, then treated with **Compound 25b** ± Poly(I:C) 0.5 µg/mL for 48 h. Confluency at 48 h was determined by live-cell imaging using an IncuCyte SX5 machine (Sartorius) (error bars = SEM, N = 3). (B) Structure of the reported covalent USP5–Ub complex (PDB ID: 3IHP(14)) revealing a disulphide bridge between C793 in the BL2 loop and C195 in the cUBP domain, observed in chains A and B. This tethering may restrict BL2 flexibility and position cUBP near the putative **Compound 25** binding site, potentially enabling additional interactions. As C195 is also implicated in USP5 dimerisation, the functional relevance of this disulphide bond warrants further investigation.

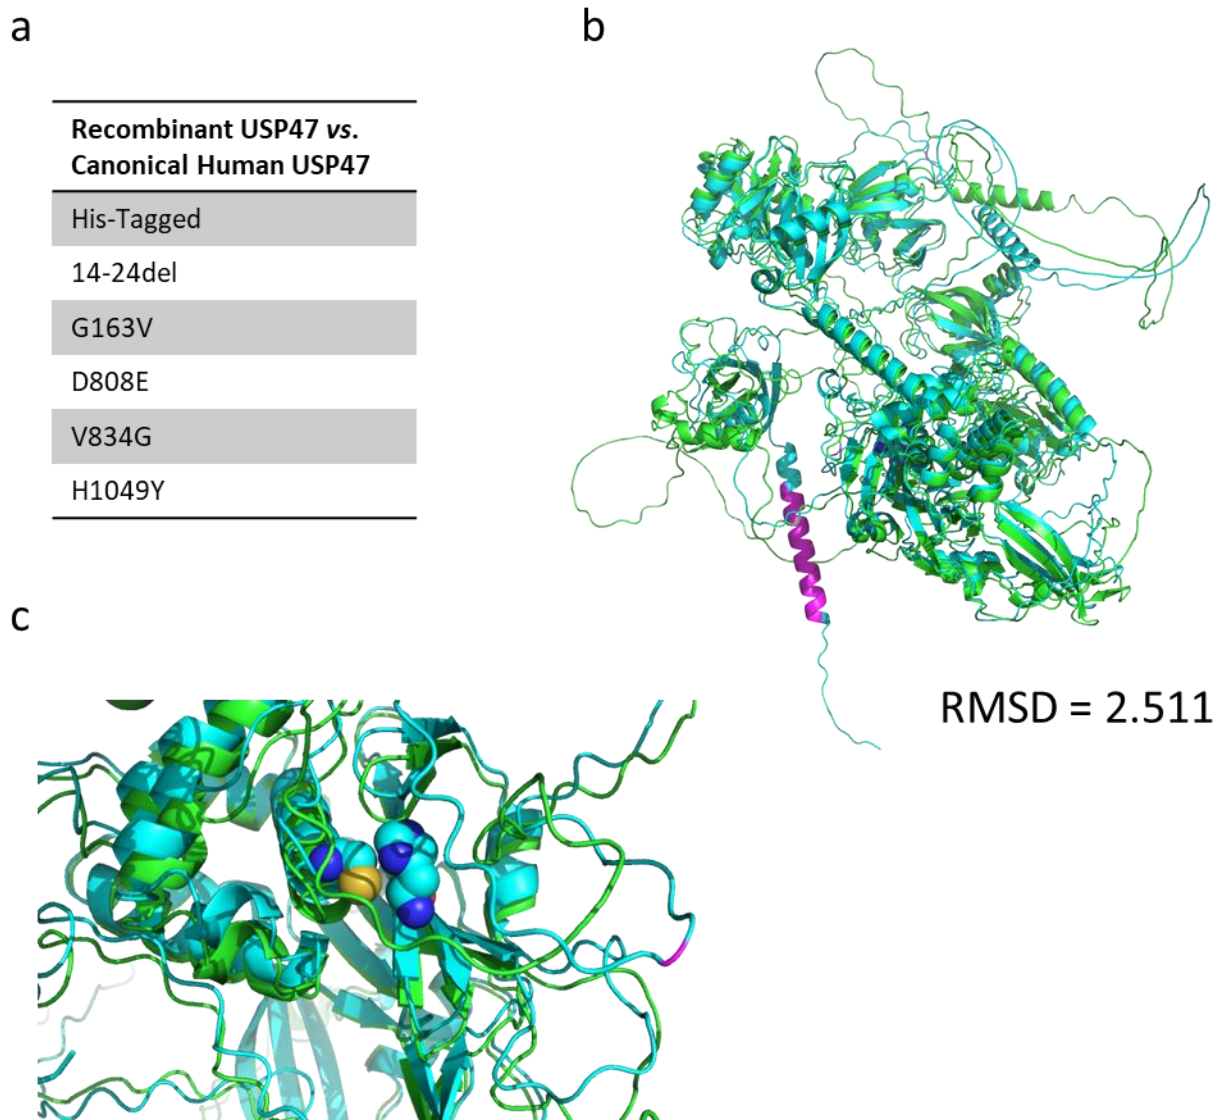

**Fig S9.** USP47 protein *Pan troglodytes* isoform 2 vs *homo sapiens* isoform 1. (A) Sequence differences between USP47 of *Pan troglodytes* isoform 2 (Accession XP\_001171097) and canonical human USP47 (Accession NP\_001317137). (B) Alignment of AlphaFold structures of USP47 based on *Pan troglodytes* isoform 2 (Accession XP\_001171097) used in kinetic and HDX-MS studies and canonical human USP47 (Accession NP\_001317137). Sequence differences are in pink, the catalytic cysteine 197 and histidine 503 residues are as spheres. (C) Close up view of alignment showing the catalytic cysteine 197 and histidine 503 residues as spheres and the nearest sequence difference in pink.

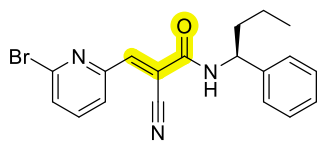

**Degrasyn (WP1130)**

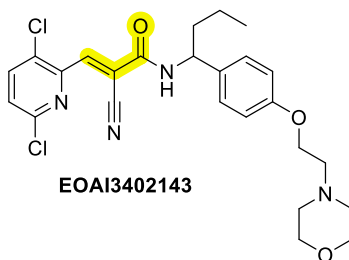

**EOAI3402143**

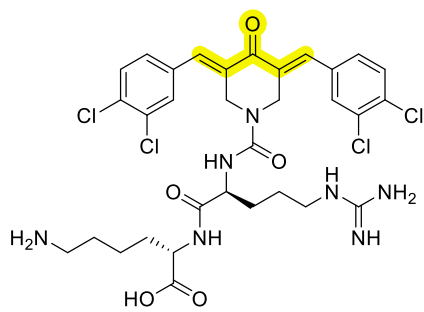

**RA-9**

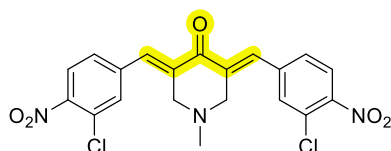

**RA-14**

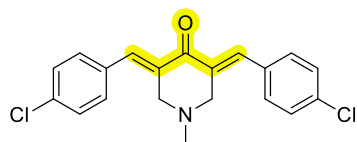

**AM146**

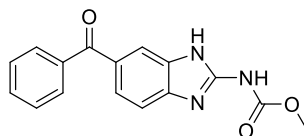

**Mebendazole**

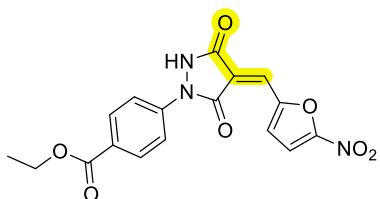

**PYR-41**

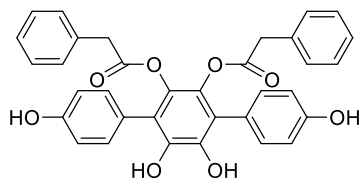

**Vialinin A**

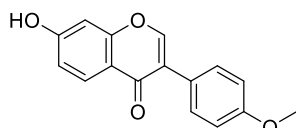

**Formononetin**

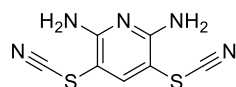

**PR 619**

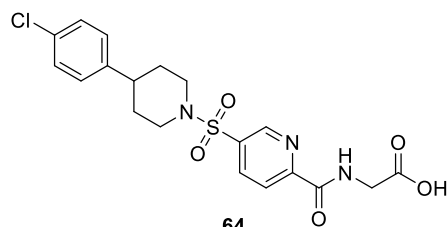

**64**

**Fig S10.** Selected reported small-molecule USP5 inhibitors. Several small-molecule USP5 inhibitors are reported, none of which to our knowledge, have yet advanced into clinical testing (15). Some of the reported small-molecule USP5 inhibitors likely work via covalently reaction with USP5. **Degrasy**n (WP1130): Degrasy is a pan-DUB inhibitor, which in addition to USP5, is also reported to inhibit USP9x, USP14, USP37, and UCHL1, as well as other nucleophilic cysteine enzymes (16). It likely inhibits USP5 via covalent reaction. **EOAI3402143**: Like the structurally related degrasy. EOAI3402143 is a broad spectrum-DUB inhibitor, which in addition to USP5, is reported to also inhibit USP9x and USP24(17, 18). **PR619**: PR619 is a pan-DUB inhibitor, which in addition to USP5, is reported to also inhibit, *e.g.*, USP2, USP4, USP7, USP8, USP15, USP20, USP28;(19) it likely inhibits via cyanide transfer.(20) **Dibenzylideneacetones RA-9, RA-14, AM146**: These dibenzylideneacetone derivatives are cell-permeable USP5 inhibitors, which likely inhibit via covalent reaction. However, they display imperfect selectivity and also inhibit UCHL1, UCHL3, USP2, and USP8.(21) **PYR-41**: Inhibits various DUBs including USP5, USP9x, USP14, UCH37, and UCHL3.(22) **Vialinin A**: Inhibits USP5, USP4 and UCHL1.(23) **Mebendazole**: Mebendazole is clinically used to treat parasite infections.(24) Notably, it is reported that Mebendazole also efficiently inhibits USP5 and USP7, suppressing c-Maf transcription. Note that its effects on other DUBs have, to our knowledge, not yet been described. **Formononetin** inhibits USP5 and structurally similar USP13.(25) **Compound 64** manifests at least partial selectivity for USP5 inhibition.(20, 26)

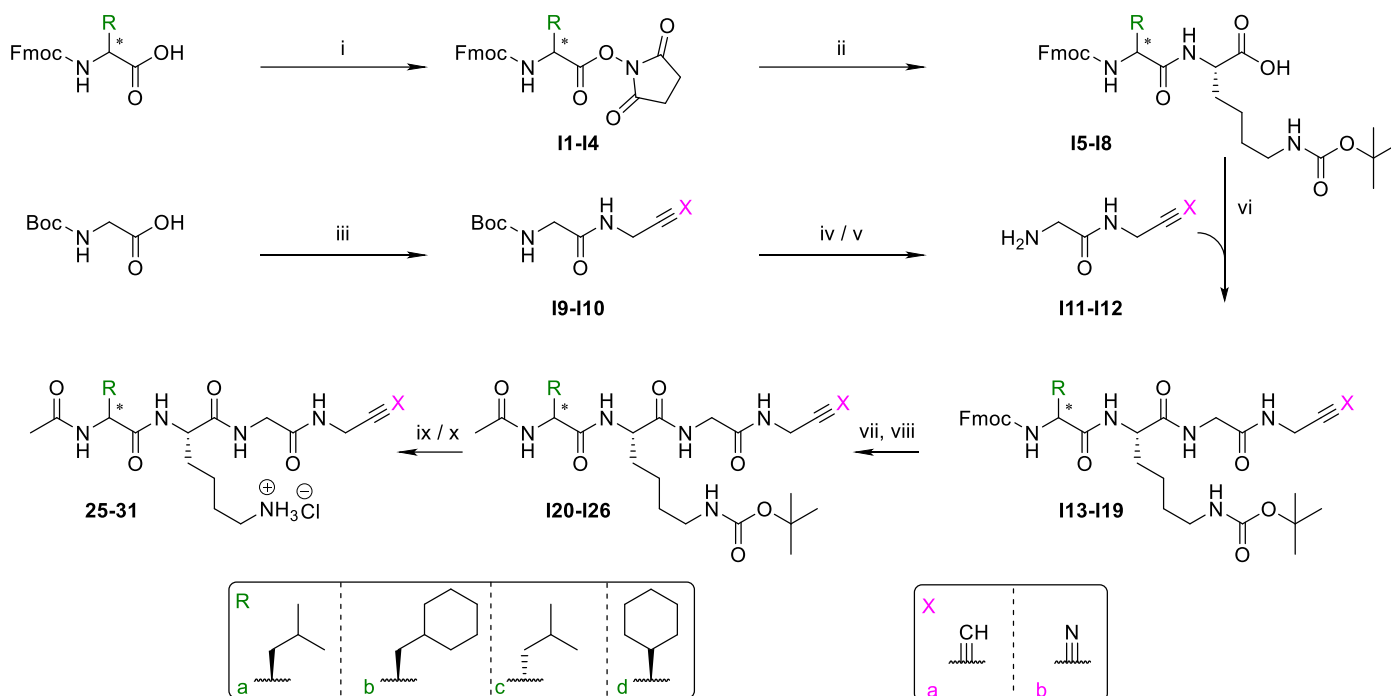

| Compound | R | X | Conditions |
|----------|---|---|------------|
| 25       | a | a | iv, x      |
| 26       | b | a | iv, x      |
| 27       | c | a | iv, x      |
| 28       | a | b | v, ix      |
| 29       | d | b | v, ix      |
| 30       | c | b | v, ix      |
| 31       | b | b | v, ix      |

**Fig S11.** Synthesis of Ub-derived **Compounds 25-31** for DUB inhibition. Reagents and Conditions: i) *N*-hydroxysuccinimide (NHS), *N,N*-dicyclohexylcarbodiimide (DCC) (1), tetrahydrofuran, 0 °C to rt, 89%-app. quant.; ii) Lys(Boc)-OH, Na<sub>2</sub>CO<sub>3</sub>, tetrahydrofuran:water (2:1<sub>v/v</sub>), 0 °C, 87-98%; iii) amine salt, *N*-(3-dimethylaminopropyl)-*N*-ethylcarbodiimide (EDC) (2), 1-hydroxybenzotriazole hydrate (HOBt), *N*-methylmorpholine (NMM), DCM, rt, 50-60%; iv) HCl in dioxane (4M), DCM, rt, app. quant.; v) formic acid, rt, app. quant.; vi) NMM, isobutyl chloroformate (IBCF), tetrahydrofuran:water (3:1<sub>v/v</sub>), -15 °C to rt, 33-97%; vii) *N,N*-diethylamine, MeCN, rt, app. quant.; viii) *N,N*-dimethylpyridin-4-amine (DMAP), Ac<sub>2</sub>O, tetrahydrofuran, reflux, 23-61%; ix) formic acid, rt; then: HCl in dioxane (4M), 66%-app. quant.; x) HCl in dioxane (4M), 2-propanol, rt, 78%-app. quant.

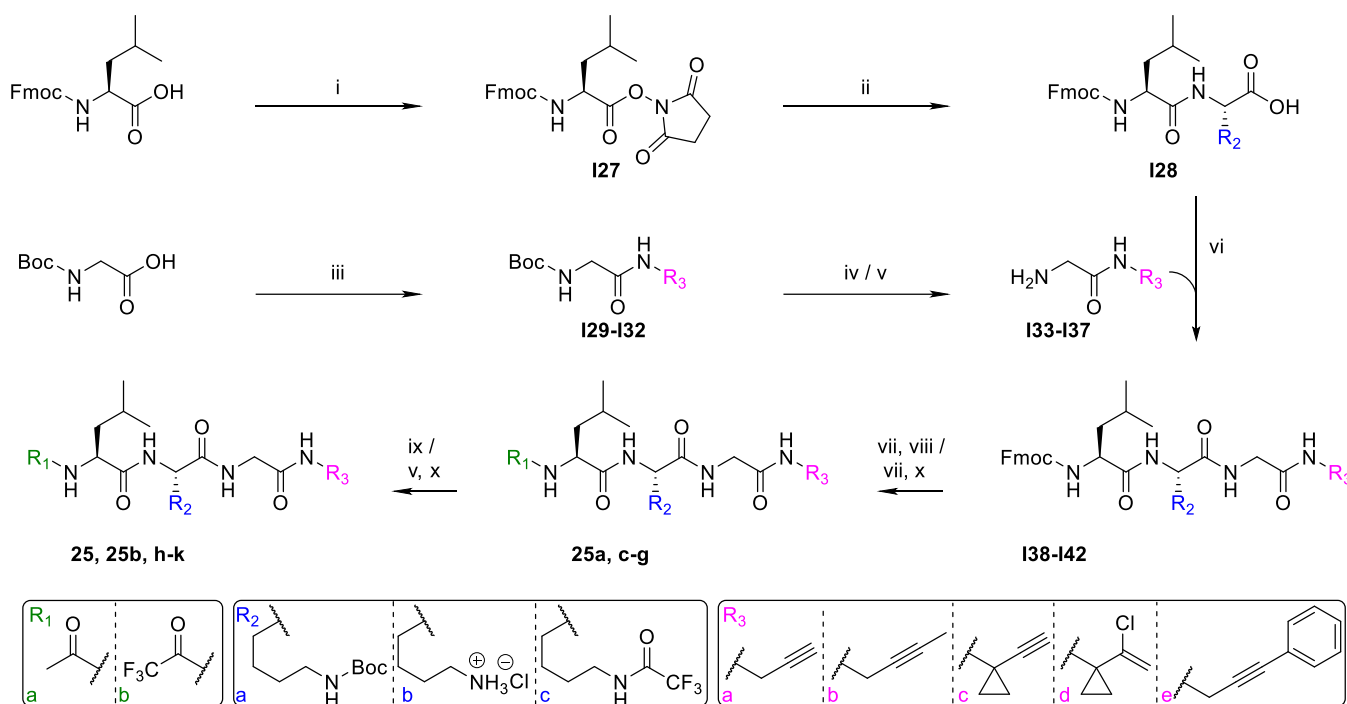

| Compound   | R <sub>1</sub> | R <sub>2</sub> | R <sub>3</sub> | Conditions | Compound   | R <sub>1</sub> | R <sub>2</sub> | R <sub>3</sub> | Conditions |
|------------|----------------|----------------|----------------|------------|------------|----------------|----------------|----------------|------------|
| <b>128</b> | -              | a              | -              |            | <b>142</b> | -              | a              | e              |            |
| <b>129</b> | -              | -              | a              |            | <b>25d</b> | a              | a              | a              | vii, viii  |
| <b>130</b> | -              | -              | b              |            | <b>25e</b> | a              | a              | b              | vii, viii  |
| <b>131</b> | -              | -              | c              |            | <b>25f</b> | a              | a              | c              | vii, viii  |
| <b>132</b> | -              | -              | e              |            | <b>25c</b> | a              | a              | d              | vii, viii  |
| <b>133</b> | -              | -              | a              | iv         | <b>25g</b> | a              | a              | e              | vii, viii  |
| <b>134</b> | -              | -              | b              | iv         | <b>25a</b> | b              | a              | a              | vii, x     |
| <b>135</b> | -              | -              | c              | v          | <b>25</b>  | a              | b              | a              | ix         |
| <b>136</b> | -              | -              | d              | iv         | <b>25j</b> | a              | b              | b              | ix         |
| <b>137</b> | -              | -              | e              | iv         | <b>25h</b> | a              | b              | c              | ix         |
| <b>138</b> | -              | a              | a              |            | <b>25i</b> | a              | b              | e              | ix         |
| <b>139</b> | -              | a              | b              |            | <b>25k</b> | b              | b              | a              | ix         |
| <b>140</b> | -              | a              | c              |            | <b>25b</b> | b              | c              | a              | v, x       |
| <b>141</b> | -              | a              | d              |            |            |                |                |                |            |

**Fig S12.** Synthesis of Ub-derived **Compounds 25a-25k** for DUB inhibition.

Reagents and Conditions: i) *N*-hydroxysuccinimide (NHS), *N,N*-dicyclohexylcarbodiimide (DCC) (1), tetrahydrofuran, 0 °C to rt, 66%; ii) Lys(Boc)-OH, Na<sub>2</sub>CO<sub>3</sub>, tetrahydrofuran:water (2:1<sub>v/v</sub>), 0 °C, app. quant.; iii) amine salt, *N*-(3-dimethylaminopropyl)-*N*-ethylcarbodiimide (EDC) (2), 1-hydroxybenzotriazole hydrate (HOBT), *N*-methylmorpholine (NMM), DCM, rt, 54-85%; iv) HCl in dioxane (4M), DCM, rt, app. quant.; v) formic acid, rt, app. quant.; vi) NMM, isobutyl chloroformate

(IBCF), tetrahydrofuran:water (3:1<sub>v/v</sub>), -15 °C to rt, 91-100%; vii) *N,N*-diethylamine, MeCN, rt, app. quant.; viii) *N,N*-dimethylpyridin-4-amine (DMAP), Ac<sub>2</sub>O, tetrahydrofuran, reflux, 1-21%; ix) formic acid, rt; then: HCl in dioxane (4M), 58-87%; x) DMAP, trifluoroacetic anhydride (TFAA), tetrahydrofuran, reflux, 1-11%.

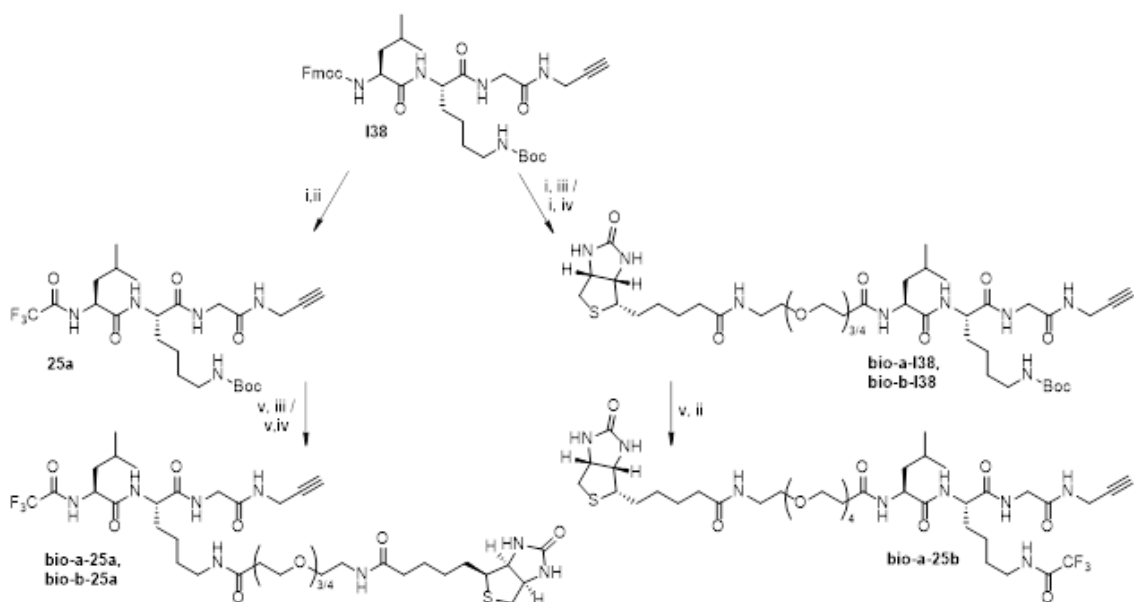

| Compound              | Conditions |
|-----------------------|------------|
| <b>bio-a-25a (31)</b> | v, iv      |
| <b>bio-b-25a (32)</b> | v, iii     |
| <b>bio-a-138 (34)</b> | i, iv      |
| <b>bio-b-138 (33)</b> | i, iii     |
| <b>bio-a-25b (35)</b> | v, ii      |

**Fig S13.** Synthesis of biotinylated Compound 25 derivatives. Reagents and Conditions: i) *N,N*-diethylamine, MeCN, rt, app. quant.; ii) *N,N*-dimethylpyridin-4-amine (DMAP), trifluoroacetic anhydride (TFAA), tetrahydrofuran, reflux, 2-11%; iii) Biotin-PEG3-NHS ester, Na<sub>2</sub>CO<sub>3</sub> (aqueous saturated), *N,N*-Dimethylformamide (DMF), rt, 30-40%; iv) Biotin-PEG4-NHS ester, Na<sub>2</sub>CO<sub>3</sub> (aqueous saturated), DMF, rt, 43-65%; v) formic acid, rt, app. quant.

## Tables

**Table S1.** Structures of reported  $\alpha\beta,\alpha'\beta'$ -diepoxyketones (DEKs) tested using *ob*ABPP-HT\*(9).

|                                                                                                                                      |                                                                                                                                     |
|--------------------------------------------------------------------------------------------------------------------------------------|-------------------------------------------------------------------------------------------------------------------------------------|
| 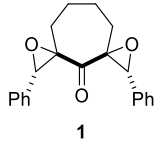 <p>1</p>                                           |  <p>5</p>                                         |
|  <p>2</p>                                           |  <p>6 (2:1 <i>trans,trans</i>:<i>cis,cis</i>)</p> |
|  <p>3</p>                                           |  <p>7</p>                                         |
|  <p>4 (1.2:1 <i>trans,trans</i>:<i>cis,cis</i>)</p> |  <p>8</p>                                         |

**Table S2.** Structures of reported  $\gamma$ -lactams tested using *obABPP-HT\**(27).

|                                                                                                 |                                                                                                 |                                                                                                  |                                                                                                  |
|-------------------------------------------------------------------------------------------------|-------------------------------------------------------------------------------------------------|--------------------------------------------------------------------------------------------------|--------------------------------------------------------------------------------------------------|
| 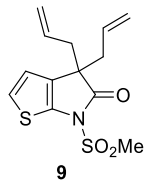<br><b>9</b>   | <br><b>13</b>  | <br><b>17</b>  | <br><b>21</b> |
| <br><b>10</b>  | <br><b>14</b>  | <br><b>18</b>  | <br><b>22</b> |
| <br><b>11</b>  | <br><b>15</b>  | <br><b>19</b>  | <br><b>23</b> |
| <br><b>12</b> | <br><b>16</b> | <br><b>20</b> |                                                                                                  |

**Table S3.** Structures of Ub-derived peptides designed for this work that were tested using *ob*ABPP-HT\*.

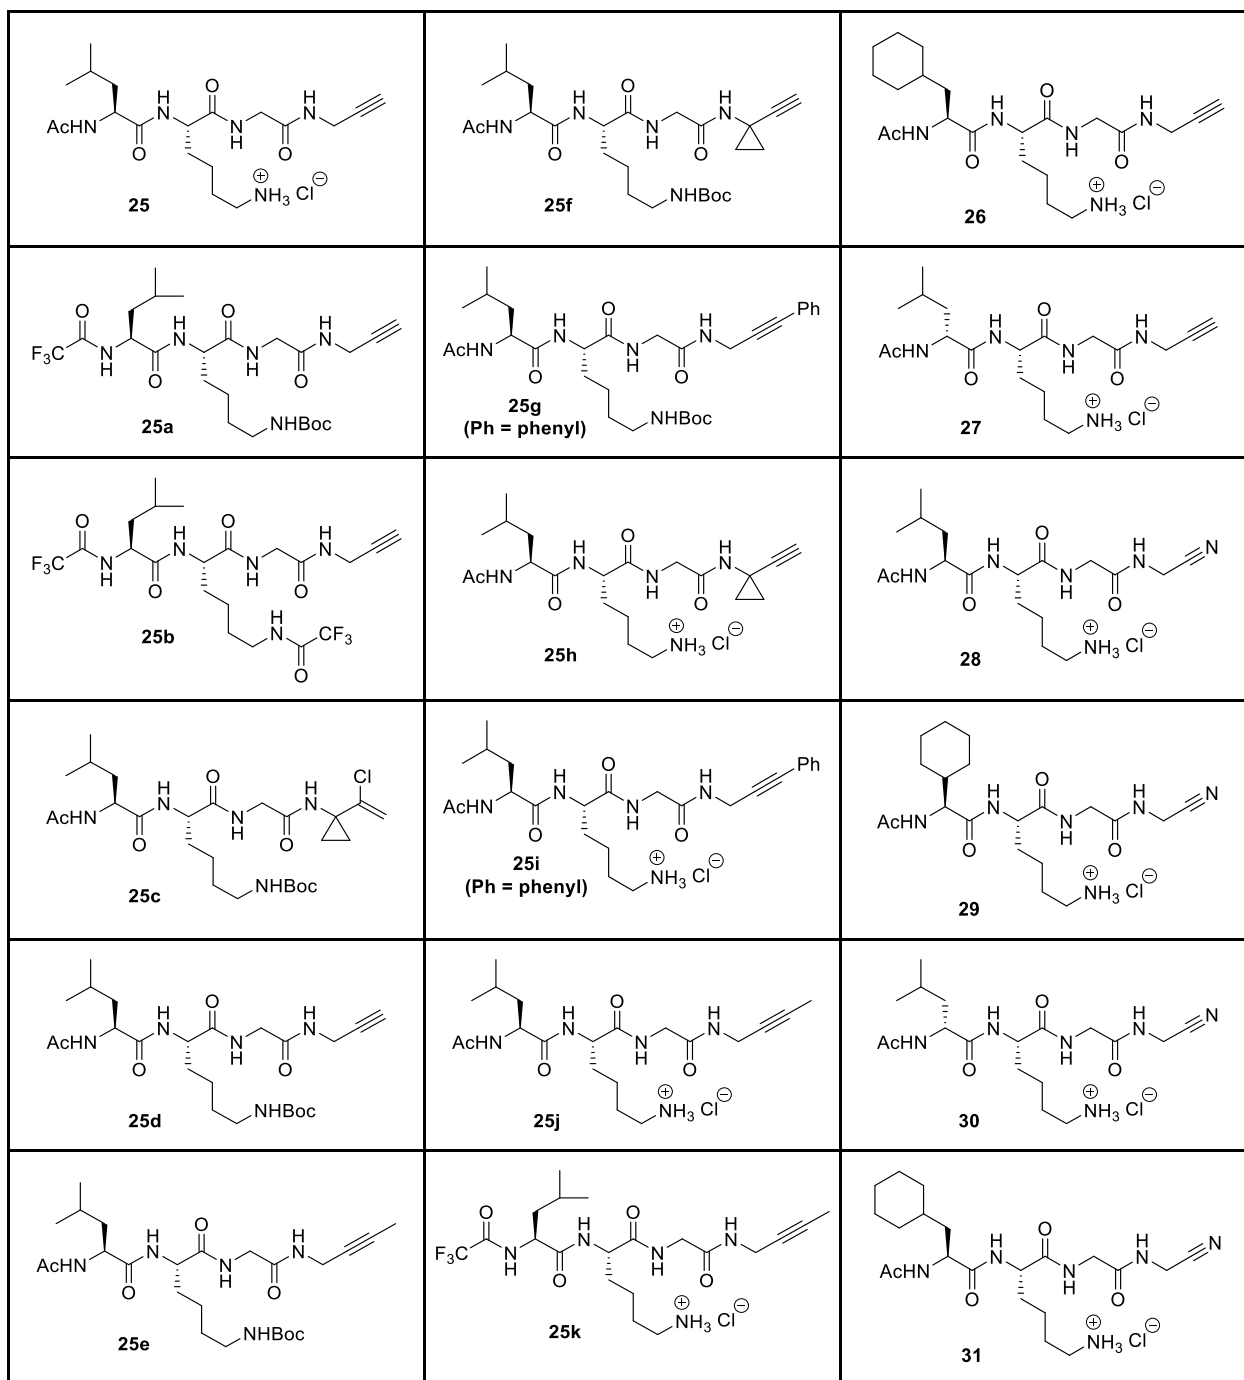

**Table S4.** Effects on alterations of the R1, R2 and R3 groups of **Compound 25** on cell permeability and USP5 binding using HA-Ub-PA assays.

|     | R <sub>1</sub>  | R <sub>2</sub>     | R <sub>3</sub>                                                                      | Cell permeable | USP5 inhibition in lysates |
|-----|-----------------|--------------------|-------------------------------------------------------------------------------------|----------------|----------------------------|
| 25c | Me              | NHBoc              |    | N              | N                          |
| 25d | Me              | NHBoc              |    | N              | Y                          |
| 25e | Me              | NHBoc              |    | N              | N                          |
| 25f | Me              | NHBoc              |    | N              | N                          |
| 25g | Me              | NHBoc              |    | N              | N                          |
| 25h | Me              | NH <sub>3</sub> Cl |    | N              | N                          |
| 25i | Me              | NH <sub>3</sub> Cl |    | N              | N                          |
| 25j | Me              | NH <sub>3</sub> Cl |  | N              | N                          |
| 25a | CF <sub>3</sub> | NHBoc              |  | Y              | Y                          |
| 25k | CF <sub>3</sub> | NH <sub>3</sub> Cl |  | N              | Y                          |
| 25b | CF <sub>3</sub> | NHTrifluoro acetyl |  | Y              | Y                          |

**Table S5.** Biotinylated Compound 25 structures.

| Name           | Structure               |
|----------------|-------------------------|
| bio-a-25a (31) | <p><b>bio-a-25a</b></p> |
| bio-b-25a (32) | <p><b>bio-b-25a</b></p> |
| bio-a-l38 (34) | <p><b>bio-a-l38</b></p> |
| bio-b-l38 (33) | <p><b>bio-b-l38</b></p> |
| bio-a-25b (35) | <p><b>bio-a-25b</b></p> |

## SI References

1. G. Cheng, V. Castelletto, C. M. Moulton, G. E. Newby, I. W. Hamley, Hydrogelation and Self-Assembly of Fmoc-Tripeptides: Unexpected Influence of Sequence on Self-Assembled Fibril Structure, and Hydrogel Modulus and Anisotropy. *Langmuir* **26**, 4990–4998 (2010).
2. M. Soethoudt, *et al.*, Selective Photoaffinity Probe That Enables Assessment of Cannabinoid CB<sub>2</sub> Receptor Expression and Ligand Engagement in Human Cells. *J. Am. Chem. Soc.* **140**, 6067–6075 (2018).
3. M. Soethoudt, *et al.*, Selective Photoaffinity Probe That Enables Assessment of Cannabinoid CB<sub>2</sub> Receptor Expression and Ligand Engagement in Human Cells. *J. Am. Chem. Soc.* **140**, 6067–6075 (2018).
4. Y. Angell, K. Burgess, Ring Closure to  $\beta$ -Turn Mimics via Copper-Catalyzed Azide/Alkyne Cycloadditions. *J. Org. Chem.* **70**, 9595–9598 (2005).
5. M. Gredičak, A. Kolonić, I. Jerić, Novel chloroenyne-modified amino acid derivatives. *Amino Acids* **35**, 185–194 (2008).
6. A. Linhardt, *et al.*, Degradable, Dendritic Polyols on a Branched Polyphosphazene Backbone. *Ind. Eng. Chem. Res.* **57**, 3602–3609 (2018).
7. L. Qin, *et al.*, Visible-light-induced decarboxylative alkylation of carboxylic acids in batch and continuous flow. *Green Synthesis and Catalysis* **5**, 20–24 (2024).
8. F. P. Bayer, M. Gander, B. Kuster, M. The, CurveCurator: a recalibrated F-statistic to assess, classify, and explore significance of dose–response curves. *Nat. Commun.* **14**, 7902 (2023).
9. M. de Munnik, *et al.*,  $\alpha\beta,\alpha'\beta'$ -Diepoxyketones are mechanism-based inhibitors of nucleophilic cysteine enzymes. *Chemical Communications* **59**, 12859–12862 (2023).
10. S. C. Shin, *et al.*, Structural and functional characterization of USP47 reveals a hot spot for inhibitor design. *Commun. Biol.* **6**, 970 (2023).
11. A. P. Turnbull, *et al.*, Molecular basis of USP7 inhibition by selective small-molecule inhibitors. *Nature* **550**, 481–486 (2017).
12. M. Hu, *et al.*, Crystal Structure of a UBP-Family Deubiquitinating Enzyme in Isolation and in Complex with Ubiquitin Aldehyde. *Cell* **111**, 1041–1054 (2002).
13. L. Rougé, *et al.*, Molecular Understanding of USP7 Substrate Recognition and C-Terminal Activation. *Structure* **24**, 1335–1345 (2016).
14. Covalent Ubiquitin-Usp5 Complex. [Preprint] (2009). Available at: [https://www.wwpdb.org/pdb?id=pdb\\_00003ihp](https://www.wwpdb.org/pdb?id=pdb_00003ihp) [Accessed 19 March 2025].
15. S.-T. Gao, X. Xin, Z. Wang, Y. Hu, Q. Feng, USP5: Comprehensive insights into structure, function, biological and disease-related implications, and emerging therapeutic opportunities. *Mol. Cell. Probes* **73**, 101944 (2024).
16. V. Kapuria, *et al.*, Deubiquitinase Inhibition by Small-Molecule WP1130 Triggers Aggresome Formation and Tumor Cell Apoptosis. *Cancer Res.* **70**, 9265–9276 (2010).
17. L. F. Peterson, *et al.*, Targeting deubiquitinase activity with a novel small-molecule inhibitor as therapy for B-cell malignancies. *Blood* **125**, 3588–3597 (2015).
18. Y. Zheng, *et al.*, EOAI, a ubiquitin-specific peptidase 5 inhibitor, prevents non-small cell lung cancer progression by inducing DNA damage. *BMC Cancer* **23**, 28 (2023).
19. M. Altun, *et al.*, Activity-Based Chemical Proteomics Accelerates Inhibitor Development for Deubiquitylating Enzymes. *Chem. Biol.* **18**, 1401–1412 (2011).
20. M. K. Mann, *et al.*, Structure–Activity Relationship of USP5 Inhibitors. *J. Med. Chem.* **64**, 15017–15036 (2021).
21. O. A. Issaenko, A. Y. Amerik, Chalcone-based small-molecule inhibitors attenuate malignant phenotype via targeting deubiquitinating enzymes. *Cell Cycle* **11**, 1804–1817 (2012).
22. V. Kapuria, *et al.*, Protein cross-linking as a novel mechanism of action of a ubiquitin-activating enzyme inhibitor with anti-tumor activity. *Biochem. Pharmacol.* **82**, 341–349 (2011).
23. K. Okada, *et al.*, Vialinin A is a ubiquitin-specific peptidase inhibitor. *Bioorg. Med. Chem. Lett.* **23**, 4328–4331 (2013).

24. X. Chen, *et al.*, Mebendazole elicits potent antimyeloma activity by inhibiting the USP5/c-Maf axis. *Acta Pharmacol. Sin.* **40**, 1568–1577 (2019).
25. Z.-W. Zhou, *et al.*, Natural isoflavone formononetin inhibits IgE-mediated mast cell activation and allergic inflammation by increasing IgE receptor degradation. *Food Funct.* **14**, 2857–2869 (2023).
26. M. K. Mann, *et al.*, Discovery of Small Molecule Antagonists of the USP5 Zinc Finger Ubiquitin-Binding Domain. *J. Med. Chem.* **62**, 10144–10155 (2019).
27. Gayatri, *et al.*, Thiophene-fused  $\gamma$ -lactams inhibit the SARS-CoV-2 main protease via reversible covalent acylation. *Chem. Sci.* **15**, 7667–7678 (2024).
