# Supplementary material
Source: Research Square preprint supplement (doi:10.21203/rs.3.rs-9106698/v1)
Supplement: Supplementary file 3 [file 4f00d38cc86131b79ffd7323.xlsx]

## Sheet: Volcano_S1G_PG
Protein.Group	Protein.Ids	Protein.Names	Genes	First.Protein.Description	No HA-Ub-PA 1	No HA-Ub-PA 2	No HA-Ub-PA 3	No HA-Ub-PA 4	HA-Ub-PA 1	HA-Ub-PA 2	HA-Ub-PA 3	HA-Ub-PA 4
A0A075B6H7;A0A0C4DH55;P01624	P01624;A0A075B6H7;A0A0C4DH55	KV315_HUMAN;KV37_HUMAN;KVD07_HUMAN	IGKV3-15;IGKV3-7;IGKV3D-7	Probable non-functional immunoglobulin kappa variable 3-7	40927.2	37465.6	25785	33262.2	26780.7	21849.9	25272.7	14547.8
A0A075B6K2;A0A075B6K5;P80748	P80748;A0A075B6K2;A0A075B6K5	LV312_HUMAN;LV321_HUMAN;LV39_HUMAN	IGLV3-12;IGLV3-21;IGLV3-9	Immunoglobulin lambda variable 3-12	4292.05	3704.9	3472.23	4466.45	3496.03	3509.08	3596.14	2106.38
A0A075B6S2;A0A0A0MRZ7;A2NJV5	A0A075B6S2;A0A0A0MRZ7;A2NJV5	KV229_HUMAN;KVD26_HUMAN;KVD29_HUMAN	IGKV2-29;IGKV2D-26;IGKV2D-29	Immunoglobulin kappa variable 2D-29	4028.63	6562.98	3506.61	5806.4	3341.63	4222.14	3052.37	7022.44
A0A087WSY6	A0A087WSY6	KVD15_HUMAN	IGKV3D-15	Immunoglobulin kappa variable 3D-15	7987.79	11722.9	8118.04	6718.72	10995.6	10957.4	9160.94	4528.89
A0A0A0MS14	A0A0A0MS14	HV145_HUMAN	IGHV1-45	Immunoglobulin heavy variable 1-45	81279.9	118771	88240.8	111620	104999	100144	85482.8	99994.3
A0A0A0MS15;A0A0B4J1V0;A0A0B4J1V6;A0A0B4J1Y9	A0A0A0MS15;A0A0B4J1V0;A0A0B4J1V6;A0A0B4J1Y9	HV315_HUMAN;HV349_HUMAN;HV372_HUMAN;HV373_HUMAN	IGHV3-15;IGHV3-49;IGHV3-72;IGHV3-73	Immunoglobulin heavy variable 3-49	3261.12	6049.91	4130	5313.51	4867.27	4491.04	5381.38	3449.95
A0A0A0MT36;A0A0C4DH26	A0A0A0MT36;A0A0C4DH26	KVD21_HUMAN;KVD41_HUMAN	IGKV6D-21;IGKV6D-41	Immunoglobulin kappa variable 6D-21	1252.75	1102.59	680.721	456.27	796.043	702.633	789.587	815.512
A0A0B4J1V1;A0A0B4J1X5;A0A0C4DH32;P01762;P01763;P01780;P01782	P01780;P01762;P01763;P01782;A0A0B4J1V1;A0A0B4J1X5;A0A0C4DH32	HV307_HUMAN;HV309_HUMAN;HV311_HUMAN;HV320_HUMAN;HV321_HUMAN;HV348_HUMAN;HV374_HUMAN	IGHV3-11;IGHV3-20;IGHV3-21;IGHV3-48;IGHV3-7;IGHV3-74;IGHV3-9	Immunoglobulin heavy variable 3-21		1270.1	527.887	1838.46	1582.54	855.138	1149.49	640.871
A0A0B4J2D5;P0DPI2	A0A0B4J2D5;P0DPI2	GAL3A_HUMAN;GAL3B_HUMAN	GATD3;GATD3B	Putative glutamine amidotransferase-like class 1 domain-containing protein 3B, mitochondrial	2217.65	3179.73	2306.09	2863.1	2487.86	4218.98	2775.07	3862.42
A0A0C4DH29	A0A0C4DH29	HV103_HUMAN	IGHV1-3	Immunoglobulin heavy variable 1-3	1746.63	2447.17	1814.04	1881.03	2463.3	2382.06	2010.98	1873.76
A0A0J9YX35	A0A0J9YX35	HV64D_HUMAN	IGHV3-64D	Immunoglobulin heavy variable 3-64D	40194	65051.2	49605.2	58988.1	58226.1	55164	53317.2	54873.9
A0AV96	A0AV96;A0AV96-2	RBM47_HUMAN	RBM47	RNA-binding protein 47	722.828	2194.85	1867.87	725.775	1373.27	1527.67	1076.05	1566.12
A0AVT1	A0AVT1;A0AVT1-2	UBA6_HUMAN	UBA6	Ubiquitin-like modifier-activating enzyme 6	4632.4	3528.89	4945.2	3885.91	4436.59	4454.47	4863.34	4168.25
A0FGR8-6	A0FGR8;A0FGR8-2;A0FGR8-4;A0FGR8-6	ESYT2_HUMAN	ESYT2	Isoform 6 of Extended synaptotagmin-2	4234.45	5159.66	4128.73	3868.14	4483.56	3650.03	4420.94	4032.7
A0MZ66;A0MZ66-3;A0MZ66-4;A0MZ66-5;A0MZ66-6;A0MZ66-7;A0MZ66-8	A0MZ66;A0MZ66-4;A0MZ66-7;A0MZ66-3;A0MZ66-5;A0MZ66-6;A0MZ66-8	SHOT1_HUMAN	SHTN1	Shootin-1	414.566	1530.24	964.381	1272.35	1521.37	1121.08	1143.95	583.312
A1L0T0	A1L0T0	HACL2_HUMAN	ILVBL	2-hydroxyacyl-CoA lyase 2	2927.09	2050.52	2128.02	2147.74	2800.26	2283.76	1563.18	2237.41
A2RTX5	A2RTX5	SYTC2_HUMAN	TARS3	Threonine--tRNA ligase 2, cytoplasmic				231.264				235.227
A2RUC4	A2RUC4	TYW5_HUMAN	TYW5	tRNA wybutosine-synthesizing protein 5	1878.71	1448.18	2121.63	2120.84	1951.2	2538.21	2296.64	1711.69
A3KMH1;A3KMH1-2;A3KMH1-3	A3KMH1;A3KMH1-2;A3KMH1-3	VWA8_HUMAN	VWA8	von Willebrand factor A domain-containing protein 8	766.148	807.128	1573.22	1198.65	1133.9	796.855	1395.19	724.55
A3KN83;A3KN83-2;A3KN83-3	A3KN83;A3KN83-2;A3KN83-3	SBNO1_HUMAN	SBNO1	Protein strawberry notch homolog 1	2217.72	2012.21	2432.23	2433.05	2094.28	2193.31	2798.8	2334.26
A4D1U4	A4D1U4	DEN11_HUMAN	DENND11	DENN domain-containing protein 11		883.459		445.052	579.827	188.653	451.358	263.163
A5YKK6;A5YKK6-2	A5YKK6;A5YKK6-2	CNOT1_HUMAN	CNOT1	CCR4-NOT transcription complex subunit 1	4512.8	3411.5	4410.8	3845.82	4192.29	3976.18	4772.97	4365.02
A6NCM1	A6NCM1	IQCAL_HUMAN	IQCA1L	IQ and AAA domain-containing protein 1-like					340.423
A6NDG6	A6NDG6	PGP_HUMAN	PGP	Glycerol-3-phosphate phosphatase	4212.25	2863.38	3786.2	2557.82	2699.79	2317.31	3583.42	2609.01
A6NHR9;A6NHR9-2	A6NHR9;A6NHR9-2;A6NHR9-3	SMHD1_HUMAN	SMCHD1	Structural maintenance of chromosomes flexible hinge domain-containing protein 1	801.472	817.052	993.295	1109.52	1106.41	1365.43	1663.78	1226.66
A6NHX0	A6NHX0	CAST2_HUMAN	CASTOR2	Cytosolic arginine sensor for mTORC1 subunit 2	1052.84	1197.04	1260.03	1012.98	1620.72	1549.63	1611.1	1094.6
A6NIH7;Q13432;Q13432-2	A6NIH7;Q13432;Q13432-2	U119A_HUMAN;U119B_HUMAN	UNC119;UNC119B	Protein unc-119 homolog B	4618.65	2783.46	4153.63	2927.81	4213.88	3372.11	3666.03	3495.13
A6NIZ1;P61224;P61224-3;P61224-4	P61224;A6NIZ1;P61224-3;P61224-4	RAP1B_HUMAN;RP1BL_HUMAN	RAP1B;RAP1BL	Ras-related protein Rap-1b-like protein	931.038	641.69	714.233	1034.62		747.117	666.379	915.195
A8MWD9;P62308	P62308;A8MWD9	RUXGL_HUMAN;RUXG_HUMAN	SNRPG;SNRPGP15	Putative small nuclear ribonucleoprotein G-like protein 15	1994.81	3157.54	2296.89	3139.13	2809.83	4719.22	1628.81	4134.52
B5ME19;Q99613;Q99613-2	Q99613;B5ME19;Q99613-2	EIF3C_HUMAN;EIFCL_HUMAN	EIF3C;EIF3CL	Eukaryotic translation initiation factor 3 subunit C-like protein	8725.13	7288.96	8090.4	6739.79	10070.1	6273.51	9648.74	8245.13
B7ZAQ6;B7ZAQ6-2;B7ZAQ6-3;P0CG08	B7ZAQ6;P0CG08;B7ZAQ6-2;B7ZAQ6-3	GPHRA_HUMAN;GPHRB_HUMAN	GPR89A;GPR89B	Golgi pH regulator A	1332.6	1300.85	1056.84	995.642	1178.82	1180	1371.59	948.702
C9JH25-2	C9JH25-2	PRRT4_HUMAN	PRRT4	Isoform 2 of Proline-rich transmembrane protein 4	339.312		1925.45	720.639		1197.84	745.047
E9PAV3;E9PAV3-2;Q13765	Q13765;E9PAV3;E9PAV3-2	NACAM_HUMAN;NACA_HUMAN	NACA	Nascent polypeptide-associated complex subunit alpha, muscle-specific form	8452.57	12347.5	9689.88	13033.5	9818.22	12407.2	10590.2	13208
E9PRG8	E9PRG8	CK098_HUMAN	C11orf98	Uncharacterized protein C11orf98	1388.63	1115.41	1657.93	2484.78	2290.22	2023.67	1662.76	1302.6
O00139;O00139-1;O00139-2;O00139-4;O00139-5	O00139;O00139-1;O00139-2;O00139-4;O00139-5	KIF2A_HUMAN	KIF2A	Kinesin-like protein KIF2A	1994.67	2339.27	2731.08	1637.1	2156.82	1882.44	2489	2686.82
O00148	O00148;O00148-2;O00148-3	DX39A_HUMAN	DDX39A	ATP-dependent RNA helicase DDX39A	43289.6	53249.2	52966.2	53107	51858.6	47160	51006.2	49137.9
O00154;O00154-4;O00154-6;O00154-7	O00154;O00154-4;O00154-2;O00154-3;O00154-5;O00154-6;O00154-7	BACH_HUMAN	ACOT7	Cytosolic acyl coenzyme A thioester hydrolase	9441.72	11441.4	11163.3	10769.7	14301.4	12100.4	11013.8	12672.6
O00159;O00159-3	O00159;O00159-3;O00159-2	MYO1C_HUMAN	MYO1C	Unconventional myosin-Ic	16537.5	17368	19043.2	16668.6	17283.2	17058.9	16725.7	15768.9
O00170	O00170	AIP_HUMAN	AIP	AH receptor-interacting protein	4050.07	3183.15	3633.89	3223.69	3733.61	3062.85	3856.29	3078.51
O00186	O00186	STXB3_HUMAN	STXBP3	Syntaxin-binding protein 3	3184.52	3610.61	4042.91	3599.94	3992.93	4152.44	4074.27	4070.61
O00189	O00189	AP4M1_HUMAN	AP4M1	AP-4 complex subunit mu-1	2549.58	3252.17	3543.9	2652.75	3141.07	3474.19	3047.63	2339.08
O00203;O00203-3	O00203;O00203-3	AP3B1_HUMAN	AP3B1	AP-3 complex subunit beta-1	5854.9	5534.37	7200.62	6388.68	5671.23	5641.25	5670.21	7355.87
O00204;O00204-2	O00204;O00204-2	ST2B1_HUMAN	SULT2B1	Sulfotransferase 2B1	2810.05	2695.47	2159.65	3173.05	2346.21	2218.35	2570.18	4084.6
O00212	O00212	RHOD_HUMAN	RHOD	Rho-related GTP-binding protein RhoD	768.945	1445.28	721.059	1091.8	1936.79	1233.63	715.841	725.529
O00214;O00214-2	O00214;O00214-2	LEG8_HUMAN	LGALS8	Galectin-8	1547.85	1604.25	1102.27	1721.27	2491.71	1432.09	1148.67	1686.42
O00217	O00217	NDUS8_HUMAN	NDUFS8	NADH dehydrogenase [ubiquinone] iron-sulfur protein 8, mitochondrial	180.002	544.945	487.105	194.512	355.371	744.176	930.286	467.082
O00231;O00231-2	O00231;O00231-2	PSD11_HUMAN	PSMD11	26S proteasome non-ATPase regulatory subunit 11	4566.74	3101.13	4252.35	3261.88	4888.21	2115.64	4196.94	3426.16
O00232	O00232;O00232-2	PSD12_HUMAN	PSMD12	26S proteasome non-ATPase regulatory subunit 12	5948.94	4456.82	6063.07	4637.77	4795.9	3921.08	6939.53	5165.56
O00233;O00233-3	O00233;O00233-3	PSMD9_HUMAN	PSMD9	26S proteasome non-ATPase regulatory subunit 9	633.635	844.398		1075.77	1009.68	435.454	302.075
O00267;O00267-2	O00267;O00267-2	SPT5H_HUMAN	SUPT5H	Transcription elongation factor SPT5	3111.12	3087.8	2717.7	2760.41	2932.86	3064.04	2995.41	2902.07
O00299	O00299	CLIC1_HUMAN	CLIC1	Chloride intracellular channel protein 1	12729.7	12419.4	11848.3	10840.2	12626.6	10747.9	12757.4	12043.5
O00303	O00303	EIF3F_HUMAN	EIF3F	Eukaryotic translation initiation factor 3 subunit F	6652.22	6547.91	7139.35	7326.46	6322.25	6159.7	6289.98	6822.1
O00410;O00410-3	O00410;O00410-2;O00410-3	IPO5_HUMAN	IPO5	Importin-5	1943.16	1794.63	2112.47	1953.89	2442.26	1684.01	2213.35	1766.35
O00418	O00418	EF2K_HUMAN	EEF2K	Eukaryotic elongation factor 2 kinase	1595.13	1384.67		1066.02	1359.08	1253.52	1048.78	1012.37
O00429;O00429-2;O00429-3;O00429-4;O00429-5;O00429-6;O00429-8;O00429-9	O00429;O00429-2;O00429-3;O00429-4;O00429-5;O00429-6;O00429-7;O00429-8;O00429-9	DNM1L_HUMAN	DNM1L	Dynamin-1-like protein	2288.76	1522.18	1817.83	1588.86	1651.55	1188.08	1714.43	1713.14
O00442;O00442-2	O00442;O00442-2	RTCA_HUMAN	RTCA	RNA 3'-terminal phosphate cyclase	2051.11	1590.77	2380.19	1778.81	1923.46	2026.2	2179.65	2227.23
O00443	O00443;O00443-2	P3C2A_HUMAN	PIK3C2A	Phosphatidylinositol 4-phosphate 3-kinase C2 domain-containing subunit alpha	1324.83	1152.12	2205.39	1948.66	2041.16	2013.25	1548.41	1128.44
O00461	O00461	GOLI4_HUMAN	GOLIM4	Golgi integral membrane protein 4	1726.46	1885.39	1236.08	1566.62	2243.49	913.885	1530.07	837.348
O00468;O00468-2;O00468-3;O00468-4;O00468-5;O00468-6;O00468-7	O00468;O00468-2;O00468-3;O00468-4;O00468-5;O00468-6;O00468-7	AGRIN_HUMAN	AGRN	Agrin	1380.82	2264.42	1938.29	1760.36	1882.87	2043.62	1503.45	1606.37
O00469;O00469-2	O00469;O00469-2	PLOD2_HUMAN	PLOD2	Procollagen-lysine,2-oxoglutarate 5-dioxygenase 2	995.348	764.114	1010.56	431.591	591.798			1286.4
O00483	O00483	NDUA4_HUMAN	NDUFA4	Cytochrome c oxidase subunit NDUFA4	4744.86	5373.7	5850.7	5913.04	5576.86	5507.82	4890.5	6159.24
O00487	O00487	PSDE_HUMAN	PSMD14	26S proteasome non-ATPase regulatory subunit 14	13607.4	12774.7	14775.5	13988.8	12813.8	12455.3	11937.2	12330.8
O00505	O00505;O00629	IMA4_HUMAN	KPNA3	Importin subunit alpha-4	1785.82	1841.76	1148.69	1425.7	1650.06	815.735	906.71	1339.5
O00571;O00571-2	O00571;O15523;Q9NQI0;O00571-2;O15523-2;Q9NQI0-2;Q9NQI0-3;Q9NQI0-4	DDX3X_HUMAN	DDX3X	ATP-dependent RNA helicase DDX3X	8644.14	8427.7	9336.96	8779.33	8400.22	9185.54	9983.24	9400.46
O00625	O00625	PIR_HUMAN	PIR	Pirin	2283.04	2165.89	1685.93	2119.26	1838.6	2183.22	2017.93	2808.76
O00712;O00712-2;O00712-4;O00712-5;P08651;P08651-2;P08651-3;P08651-4;P08651-5;P08651-6;Q12857;Q12857-2;Q12857-3;Q12857-4;Q14938;Q14938-2;Q14938-3;Q14938-4;Q14938-5;Q14938-6	O00712;P08651;Q12857;Q14938;Q14938-5;O00712-2;O00712-4;O00712-5;P08651-2;P08651-3;P08651-4;P08651-5;P08651-6;Q12857-2;Q12857-3;Q12857-4;Q14938-2;Q14938-3;Q14938-4;Q14938-6	NFIA_HUMAN;NFIB_HUMAN;NFIC_HUMAN;NFIX_HUMAN	NFIA;NFIB;NFIC;NFIX	Nuclear factor 1 B-type	1900.92	2631.56	2445.11	1856.58	2970.68	2949.05	2351.72	2139.35
O00743;O00743-2;O00743-3	O00743;O00743-2;O00743-3	PPP6_HUMAN	PPP6C	Serine/threonine-protein phosphatase 6 catalytic subunit	4912.83	4385.65	4468.83	5022.82	4047.79	4613.77	4189.41	5566.52
O00757	O00757	F16P2_HUMAN	FBP2	Fructose-1,6-bisphosphatase isozyme 2	15549.8	19925.7	14201.2	19048.4	14972.1	14767.9	13118.8	15787.7
O00764;O00764-2	O00764;O00764-2	PDXK_HUMAN	PDXK	Pyridoxal kinase	876.709	1158.35	933.228	1242.49	1149.7	874.169	1116.5	1186.82
O00767	O00767	SCD_HUMAN	SCD	Stearoyl-CoA desaturase	5519.1	4016.07	4150.59	4188.61	6327.98	4141.79	7410.58	3876.07
O14519;O14519-2;O75956	O14519;O75956;O14519-2	CDKA1_HUMAN;CDKA2_HUMAN	CDK2AP1;CDK2AP2	Cyclin-dependent kinase 2-associated protein 1				623.877				252.215
O14530;O14530-2	O14530;O14530-2	TXND9_HUMAN	TXNDC9	Thioredoxin domain-containing protein 9	1772.69	1211.66	1390.57	1318.27	686.668	767.312	1347.47	1016.99
O14562	O14562	UBFD1_HUMAN	UBFD1	Ubiquitin domain-containing protein UBFD1	3732.49	4371.99	4228.6	3317.32	2871.08	3635.8	2985.33	2909.2
O14602;P47813	P47813;O14602	IF1AX_HUMAN;IF1AY_HUMAN	EIF1AX;EIF1AY	Eukaryotic translation initiation factor 1A, Y-chromosomal		515.011	428.714	654.673	411.994		684.84	638.006
O14617;O14617-4;O14617-5	O14617;O14617-2;O14617-3;O14617-4;O14617-5	AP3D1_HUMAN	AP3D1	AP-3 complex subunit delta-1	1585.48	1678.74	2093.92	2493.76	2066.29	2255.59	2623.21	1709.44
O14656	O14656	TOR1A_HUMAN	TOR1A	Torsin-1A	484.343	1187.74	1025.91	1093.5		866.424	1198.13	994.659
O14672	O14672	ADA10_HUMAN	ADAM10	Disintegrin and metalloproteinase domain-containing protein 10	1086.11	1669.65	772.149	1421.13	774.615	936.603	928.719	1245.22
O14734	O14734	ACOT8_HUMAN	ACOT8	Acyl-coenzyme A thioesterase 8	328.281	898.972	303.721	611.002	294.17	276.356		349.426
O14735;O14735-3	O14735;O14735-3	CDIPT_HUMAN	CDIPT	CDP-diacylglycerol--inositol 3-phosphatidyltransferase	2759.74	4770.51	3878.53	4369.94	4469.56	5190.8	3281.38	5714.46
O14744	O14744;O14744-2;O14744-3;O14744-4;O14744-5	ANM5_HUMAN	PRMT5	Protein arginine N-methyltransferase 5	15617	19370.7	17795	18543.1	16238.5	22984.5	18376.7	23780.9
O14745	O14745;O14745-2	NHRF1_HUMAN	NHERF1	Na(+)/H(+) exchange regulatory cofactor NHE-RF1	1248.27	6607.52	1784.25	4869.86	1520.56	1145.74	1512.35	1259.54
O14776;O14776-2	O14776;O14776-2	TCRG1_HUMAN	TCERG1	Transcription elongation regulator 1	3554.25	2325.08	3152.93	2513.79	3951.45	2072.29	3049.18	2462.22
O14787-2	O14787;O14787-2	TNPO2_HUMAN	TNPO2	Isoform 2 of Transportin-2	2954.79	2106.98	1660.13	2222.1	1236.37	1240.67	3435.63	2062.44
O14802	O14802	RPC1_HUMAN	POLR3A	DNA-directed RNA polymerase III subunit RPC1	3121.27	3243.96	2945.6	3766.72	3494.33	3356.08	3913.72	2747.4
O14818	O14818;O14818-2	PSA7_HUMAN	PSMA7	Proteasome subunit alpha type-7	13517.9	13213.7	11357.9	13496.8	9528.69	12442.3	10980	14012.8
O14828	O14828;O14828-2	SCAM3_HUMAN	SCAMP3	Secretory carrier-associated membrane protein 3	10101.5	11340.1	10559.5	10302.1	9741.59	9083.28	8670.93	9318.56
O14880	O14880	MGST3_HUMAN	MGST3	Glutathione S-transferase 3, mitochondrial	351.259	988.188	467.166	718.242	790.906	819.001	621.229	700.219
O14925	O14925;Q5SRD1;Q5SRD1-2	TIM23_HUMAN	TIMM23	Mitochondrial import inner membrane translocase subunit Tim23	2020.68	2566.91	2847.02	2282.29	2436.4	1917.14	2552.24	2786.6
O14929	O14929;O14929-2	HAT1_HUMAN	HAT1	Histone acetyltransferase type B catalytic subunit	11634.3	14060.7	12212.3	13651.2	13921.3	11774.8	11209.9	11455.9
O14950;P19105	O14950;P19105	ML12A_HUMAN;ML12B_HUMAN	MYL12A;MYL12B	Myosin regulatory light chain 12B	1886.37	3914.63	1293.38	2251.38	1615.56	906.418	1897.15	1430.84
O14974;O14974-2;O14974-3;O14974-4;O14974-5	O14974;O14974-2;O14974-3;O14974-4;O14974-5	MYPT1_HUMAN	PPP1R12A	Protein phosphatase 1 regulatory subunit 12A	1742.92	1541.89	1629.78	2247.36	623.722	1389.05	1459.37	1030.85
O14975;O14975-2	O14975;O14975-2	S27A2_HUMAN	SLC27A2	Long-chain fatty acid transport protein 2	2393.2	2427.21	2309.04	1631.46	2176.66	1995.04	2110.06	2035.29
O14976	O14976;O14976-2	GAK_HUMAN	GAK	Cyclin-G-associated kinase	2833.75	2670.45	3277.44	2858.68	2267.33	2885.85	3523.65	2579.64
O14980	O14980	XPO1_HUMAN	XPO1	Exportin-1	3488.12	3316.7	3771.27	3128.2	3936.66	2248.78	3953.73	3252.39
O14981	O14981;O14981-2	BTAF1_HUMAN	BTAF1	TATA-binding protein-associated factor 172	3574.62	4811.67	3333.7	2934.17	4084.17	3065.3	2670.53	3052.18
O15020;O15020-2	O15020;O15020-2	SPTN2_HUMAN	SPTBN2	Spectrin beta chain, non-erythrocytic 2	1672.42	1427.63	1450.25	1261.16	1418.56	1373.36	1812.19	1601.61
O15027;O15027-2;O15027-3;O15027-4;O15027-5	O15027;O15027-2;O15027-3;O15027-4;O15027-5	SC16A_HUMAN	SEC16A	Protein transport protein Sec16A	972.218		1294.63	1412.12	1533.39	1403.28	1261.03	1728.36
O15042;O15042-2	O15042;O15042-2	SR140_HUMAN	U2SURP	U2 snRNP-associated SURP motif-containing protein	1371.07	3094.45	2148.71	2279.97	1997.7	2501.71	2305.61	2592.94
O15047	O15047	SET1A_HUMAN	SETD1A	Histone-lysine N-methyltransferase SETD1A	1176.81	700.027	986.816	1130.87	651.564	658.189	782.25	621.865
O15067	O15067	PUR4_HUMAN	PFAS	Phosphoribosylformylglycinamidine synthase	6517.47	7831.66	6635.47	6905.23	6566.38	7025.29	6622.99	7202.12
O15084;O15084-1;O15084-4	O15084;O15084-1;O15084-2;O15084-4	ANR28_HUMAN	ANKRD28	Serine/threonine-protein phosphatase 6 regulatory ankyrin repeat subunit A	1685.91	1890.52	1871.56	1694.62	2296.38	2384.82	2248.52	2152.57
O15091;O15091-2;O15091-4	O15091;O15091-2;O15091-4	MRPP3_HUMAN	PRORP	Mitochondrial ribonuclease P catalytic subunit	509.017	371.033	593.763	507.57	409.946	930.344	571.846	428.499
O15143	O15143	ARC1B_HUMAN	ARPC1B	Actin-related protein 2/3 complex subunit 1B	10109.9	11789.7	10322.4	10845.1	13473.4	11775.1	10974.8	10277.7
O15144	O15144	ARPC2_HUMAN	ARPC2	Actin-related protein 2/3 complex subunit 2	13028.9	15149.9	12833.1	14508	15532.1	15924	14811.2	16656.7
O15145	O15145	ARPC3_HUMAN	ARPC3	Actin-related protein 2/3 complex subunit 3	3333.7	3160.47	3249.23	3378.81	4291.94	4930.03	3405.97	4033.29
O15160	O15160;O15160-2	RPAC1_HUMAN	POLR1C	DNA-directed RNA polymerases I and III subunit RPAC1	4801.83	5847.18	4518.81	5060.01	4436.75	4384.65	4875.38	5895.12
O15198;O15198-2;P84022;P84022-2;P84022-3;P84022-4;Q15796;Q15796-2;Q15797;Q99717	O15198;P84022;Q15796;Q15797;Q99717;O15198-2;P84022-2;P84022-3;P84022-4;Q15796-2	SMAD1_HUMAN;SMAD2_HUMAN;SMAD3_HUMAN;SMAD5_HUMAN;SMAD9_HUMAN	SMAD1;SMAD2;SMAD3;SMAD5;SMAD9	Mothers against decapentaplegic homolog 9	1486.96	1681.98	2180.75	1804.3	1576.22	2259.29	1383.67	1987.18
O15226;O15226-2	O15226;O15226-2	NKRF_HUMAN	NKRF	NF-kappa-B-repressing factor	935.178	1449.04	1290.75	1136.83	993.845	1591.17	1437.18	1189.64
O15258	O15258	RER1_HUMAN	RER1	Protein RER1	1736.3	1650.91	1776.29	1838.98	1850.34	1957.93	1755.64	1927.13
O15260;O15260-2	O15260;O15260-2	SURF4_HUMAN	SURF4	Surfeit locus protein 4	4778.28	9794.21	9090.49	11880.9	9646.56	13204.4	10602.8	13829.7
O15264	O15264	MK13_HUMAN	MAPK13	Mitogen-activated protein kinase 13	2267.8	1496	2316.11	1487.48	1901.52	1216.53	1794.01	1729.12
O15269	O15269	SPTC1_HUMAN	SPTLC1	Serine palmitoyltransferase 1	1933.58	2175.51	2410.4	2425.55	2151.48	2852.99	2313.91	3012.82
O15270	O15270	SPTC2_HUMAN	SPTLC2	Serine palmitoyltransferase 2	1691.18	1654.27	1614.5	1440.69	394.323	1505.83
O15294;O15294-3	O15294;O15294-2;O15294-3;O15294-4	OGT1_HUMAN	OGT	UDP-N-acetylglucosamine--peptide N-acetylglucosaminyltransferase 110 kDa subunit	2243.99	1977.53	2435.65	2169.43	2489.42	1989.41	1961.61	1629.31
O15305	O15305	PMM2_HUMAN	PMM2	Phosphomannomutase 2	1947.76	1481.49	850.084	1428.15	988.472	1685.71	1231.23	2358.98
O15321;O15321-2	O15321;O15321-2	TM9S1_HUMAN	TM9SF1	Transmembrane 9 superfamily member 1	1305.92	1570.75	1735.33	1361.2	1516.72	1343.42	1541.43	1601.2
O15327	O15327	INP4B_HUMAN	INPP4B	Inositol polyphosphate 4-phosphatase type II	2715.58	3396.15	4518.61	4526.4	3604.3	3821.03	3312.82	3773.24
O15347	O15347	HMGB3_HUMAN	HMGB3	High mobility group protein B3	1074.62	1921.96	693.16	488.784	1004.49	552.621	670.605
O15355	O15355	PPM1G_HUMAN	PPM1G	Protein phosphatase 1G	3189.89	3238.96	3019.84	3312.33	3510.32	3180.12	3713.49	4642.25
O15357	O15357;O15357-2	SHIP2_HUMAN	INPPL1	Phosphatidylinositol 3,4,5-trisphosphate 5-phosphatase 2	2521.2	2950.41	2446.55	2840.96	2997.99	2856.3	2786.98	2740.56
O15371;O15371-2;O15371-3	O15371;O15371-2;O15371-3	EIF3D_HUMAN	EIF3D	Eukaryotic translation initiation factor 3 subunit D	8200.58	9831.19	8623.42	10228.3	7831.37	9983.27	8601.33	9590.59
O15372	O15372	EIF3H_HUMAN	EIF3H	Eukaryotic translation initiation factor 3 subunit H	9560.17	12836.1	9494.35	11721.4	9333.38	12611.9	10151.9	13595
O15379;O15379-2	O15379;O15379-2	HDAC3_HUMAN	HDAC3	Histone deacetylase 3	1270.73	2028.5	2055.55	1475.97	1534.13	1466.29	1279.18	1794.76
O15394	O15394	NCAM2_HUMAN	NCAM2	Neural cell adhesion molecule 2	1165.92	1162.29	954.238	1280.67	1210.81	1122.85		1205.31
O15397	O15397;O15397-2	IPO8_HUMAN	IPO8	Importin-8	656.807	571.657	974.037	769.696	1250.13	621.497	841.231	653.246
O15498;O15498-2	O15498;O15498-2	YKT6_HUMAN	YKT6	Synaptobrevin homolog YKT6	2925.9	2650.48	2932.27	3421.79	2556.61	2608.9	3244.82	2250.87
O15511	O15511	ARPC5_HUMAN	ARPC5	Actin-related protein 2/3 complex subunit 5	380.403	921.541	385.307					718.132
O15540	O15540	FABP7_HUMAN	FABP7	Fatty acid-binding protein, brain	1007.36	587.069	851.225		445.106
O15551	O14493;O15551;O95484;P56747	CLD3_HUMAN	CLDN3	Claudin-3	3612.91	3563.07	4054.29	3879.36	3775.75	2868.68	4000.51	4499.8
O43143	O43143;O60231;Q14562	DHX15_HUMAN	DHX15	ATP-dependent RNA helicase DHX15	10011.6	9530.49	11360.5	9039.22	11236.4	11043.2	11886.3	10320.6
O43148;O43148-2	O43148;O43148-2	MCES_HUMAN	RNMT	mRNA cap guanine-N7 methyltransferase	5077.5	6106.99	5464.73	4856	4387.33	6138.9	5685.88	5432.58
O43149	O43149	ZZEF1_HUMAN	ZZEF1	Zinc finger ZZ-type and EF-hand domain-containing protein 1			283.464
O43156	O43156	TTI1_HUMAN	TTI1	TELO2-interacting protein 1 homolog	1567.07	1275.58	1503.81	947.716	1448.22	1157.4	1150.27	1389.64
O43159	O43159	RRP8_HUMAN	RRP8	Ribosomal RNA-processing protein 8	326.043	627.077	752.066	590.328	706.738	621.385	867.812	595.798
O43172;O43172-2	O43172;O43172-2	PRP4_HUMAN	PRPF4	U4/U6 small nuclear ribonucleoprotein Prp4	5976.42	6311.77	6987.54	6359.86	7317.87	8796.69	7464.41	8239.89
O43175	O43175	SERA_HUMAN	PHGDH	D-3-phosphoglycerate dehydrogenase	25047.3	19843.5	25201.8	19789.3	18488.9	19331.4	22509.2	21954
O43237;O43237-2	O43237;O43237-2	DC1L2_HUMAN	DYNC1LI2	Cytoplasmic dynein 1 light intermediate chain 2	4197.22	2465.04	3236.26	2736.45	3276.32	1770.15	2805.62	3156.73
O43242	O43242;O43242-2	PSMD3_HUMAN	PSMD3	26S proteasome non-ATPase regulatory subunit 3	8687.83	8503.01	10282.8	9695.18	9908.49	9721.84	9940.37	9714.43
O43252	O43252	PAPS1_HUMAN	PAPSS1	Bifunctional 3'-phosphoadenosine 5'-phosphosulfate synthase 1	4818.28	4420.64	4414.5	4641.6	4481.04	4592.27	4435.03	4471.76
O43278;O43278-2	O43278;O43278-2	SPIT1_HUMAN	SPINT1	Kunitz-type protease inhibitor 1	3976.15	3687.4	4560.52	5377.36	5303.91	5270.73	4480.85	4720.63
O43281;O43281-2;O43281-3	O43281;O43281-2;O43281-3	EFS_HUMAN	EFS	Embryonal Fyn-associated substrate	2667.46	4400.42	3015.68	3441.33			1081.35
O43292	O43292;O43292-2	GPAA1_HUMAN	GPAA1	Glycosylphosphatidylinositol anchor attachment 1 protein	566.107	1696.36	1062.53	1220.97	1300.1	1112.55	1071.25	1371.35
O43314;O43314-2	O43314;O43314-2	VIP2_HUMAN	PPIP5K2	Inositol hexakisphosphate and diphosphoinositol-pentakisphosphate kinase 2			755.486	455.763	887.474	839.146	670.495	726.611
O43324	O43324	MCA3_HUMAN	EEF1E1	Eukaryotic translation elongation factor 1 epsilon-1	3127.29	2570.14	4131.82	2658.75	2603.62	2080.65	3015.39	2404.65
O43353;O43353-2	O43353;O43353-2	RIPK2_HUMAN	RIPK2	Receptor-interacting serine/threonine-protein kinase 2	1392.96	1206.84	1851.89	2082.86	1019.25	1307.75	774.337	1046.43
O43390;O43390-2;O43390-4	O43390;O43390-2;O43390-3;O43390-4	HNRPR_HUMAN	HNRNPR	Heterogeneous nuclear ribonucleoprotein R	3101.78	3469.54	3914.96	3399.72	3364.97	2942.18	3624.69	2957.98
O43395	O43395	PRPF3_HUMAN	PRPF3	U4/U6 small nuclear ribonucleoprotein Prp3	2815.09	2496.81	2717.3	2220.62	2452.14	2746.87	3114.77	2630.02
O43396	O43396	TXNL1_HUMAN	TXNL1	Thioredoxin-like protein 1	6186.04	8725.64	6410.73	8459.28	6783.81	8276.32	7323.38	8991.32
O43414;O43414-2;O43414-3	O43414;O43414-2;O43414-3	ERI3_HUMAN	ERI3	ERI1 exoribonuclease 3	2146.25	2270.44	1400.8	1616.43	2904.39	2009.38	2135.97	2025.41
O43427;O43427-2	O43427;O43427-2	FIBP_HUMAN	FIBP	Acidic fibroblast growth factor intracellular-binding protein	1147.4	781.783	916.613	1213.16	1215.03	776.266	1075.27	1393.08
O43432;O43432-3;O43432-4	O43432;O43432-3;O43432-4	IF4G3_HUMAN	EIF4G3	Eukaryotic translation initiation factor 4 gamma 3	1025.01	878.355	1180.59	1131.72		535.337	419.428	544.582
O43447	O43447;O43447-2	PPIH_HUMAN	PPIH	Peptidyl-prolyl cis-trans isomerase H	2868.82	3961.54	4060.73	5728.2	3708.35	4241.63	4100.16	4847.01
O43464;O43464-2;O43464-3	O43464;O43464-2;O43464-3	HTRA2_HUMAN	HTRA2	Serine protease HTRA2, mitochondrial	1190.27	1121.89	944.453	1051.16	1117.11	805.167	920.235	444.824
O43488	O43488	ARK72_HUMAN	AKR7A2	Aflatoxin B1 aldehyde reductase member 2	2186.4	2394.09	1917.52	2679.2	1473.55	1839.83	1749.58	3528.49
O43570;O43570-2	O43570;O43570-2	CAH12_HUMAN	CA12	Carbonic anhydrase 12	3377.72	3023.31	2830.92	3984	4400.81	3791.29	3120.09	4073.1
O43572	O43572	AKA10_HUMAN	AKAP10	A-kinase anchor protein 10, mitochondrial	534.845	485.454	905.606				464.124
O43592	O43592	XPOT_HUMAN	XPOT	Exportin-T	11651.9	12058.3	12652.2	12819.8	12700.5	13142.3	13122.8	12223
O43598;O43598-2	O43598;O43598-2	DNPH1_HUMAN	DNPH1	2'-deoxynucleoside 5'-phosphate N-hydrolase 1	1567.6	1307.42	818.465	964.467		725.816	903.685	589.063
O43615	O43615	TIM44_HUMAN	TIMM44	Mitochondrial import inner membrane translocase subunit TIM44	3215.18	3206.34	2734.1	3335.19	3405.11	3416.68	2936.1	3721.65
O43639;P16333	O43639;P16333	NCK1_HUMAN;NCK2_HUMAN	NCK1;NCK2	Cytoplasmic protein NCK2	715.996	413.774	413.034	303.896		452.348	480.691	440.353
O43681	O43681	GET3_HUMAN	GET3	ATPase GET3	15480.7	19849.6	16017.5	16074.5	14734.2	15319.5	14363.2	14819
O43684;O43684-2	O43684;O43684-2	BUB3_HUMAN	BUB3	Mitotic checkpoint protein BUB3	11790.7	15062	12281.7	14515.5	13150.3	14446.7	14070	14075.3
O43707	O43707;O43707-2;O43707-3	ACTN4_HUMAN	ACTN4	Alpha-actinin-4	31955.5	28019.6	30315.2	34982.4	35594.5	23049.1	35681.7	26039.9
O43719	O43719	HTSF1_HUMAN	HTATSF1	HIV Tat-specific factor 1	3376.27	3667.54	3824.71	3965.4	3549.12	3004.34	3808.51	3286.1
O43739;O43739-2;Q99418;Q99418-2	O43739;Q15438;Q99418;O43739-2;Q15438-2;Q15438-3;Q99418-2	CYH2_HUMAN;CYH3_HUMAN	CYTH2;CYTH3	Cytohesin-3	1085.81	986.335	1866.49	1027.43	2034.6	1025.13	1557.41	1091.79
O43741;O43741-2;Q9Y478	O43741;Q9Y478;O43741-2	AAKB1_HUMAN;AAKB2_HUMAN	PRKAB1;PRKAB2	5'-AMP-activated protein kinase subunit beta-2		1842.03	1963.18	1857.01		838.879	1936.67	621.865
O43747;O43747-2	O43747;O43747-2	AP1G1_HUMAN	AP1G1	AP-1 complex subunit gamma-1	10334.1	10178.8	10516.5	10453.1	10672.5	9116.35	9368.79	9048.66
O43768;O43768-2;O43768-3;O43768-4;O43768-5;O43768-6;O43768-7;O43768-9;P56211;P56211-2	O43768;P56211;O43768-2;O43768-3;O43768-4;O43768-5;O43768-6;O43768-7;O43768-9;P56211-2	ARP19_HUMAN;ENSA_HUMAN	ARPP19;ENSA	Alpha-endosulfine	420.493	1230.32		1211.64
O43772	O43772	MCAT_HUMAN	SLC25A20	Mitochondrial carnitine/acylcarnitine carrier protein	1065.79	1408.08	1136.48	1330.86	1257.41	1100.49	1348.78	907.236
O43776	O43776	SYNC_HUMAN	NARS1	Asparagine--tRNA ligase, cytoplasmic	18603.9	22352.4	20196.2	22248.1	21685.8	26858.9	20803.4	27209.3
O43795;O43795-2	O43795;O43795-2	MYO1B_HUMAN	MYO1B	Unconventional myosin-Ib	3731.15	4291.04	4426.19	4234.78	4562.67	4723.27	5290.04	4557.93
O43809	O43809	CPSF5_HUMAN	NUDT21	Cleavage and polyadenylation specificity factor subunit 5			358.633		780.076	949.536	550.321	443.074
O43813	O43813	LANC1_HUMAN	LANCL1	Glutathione S-transferase LANCL1	1341.8	2204.84	1726.57	1519.72	2463.33	1364.54	1650.39	1693.35
O43815;O43815-2	O43815;O43815-2	STRN_HUMAN	STRN	Striatin	313.051	585.509	359.609		637.355	390.436	364.917	372.973
O43837	O43837;O43837-2	IDH3B_HUMAN	IDH3B	Isocitrate dehydrogenase [NAD] subunit beta, mitochondrial	967.766	1293.48	1636.66	1965.97	895.682	1249.05	1189.47	1294.37
O43847;O43847-2	O43847;O43847-2	NRDC_HUMAN	NRDC	Nardilysin	2859.09	2667.06	2828.05	3110.19	2107.99	2231.37	2801.18	3120.66
O43852;O43852-10;O43852-11;O43852-12;O43852-13;O43852-14;O43852-2;O43852-3;O43852-4;O43852-5;O43852-6;O43852-7;O43852-8;O43852-9	O43852;O43852-10;O43852-11;O43852-12;O43852-13;O43852-14;O43852-2;O43852-3;O43852-4;O43852-5;O43852-6;O43852-7;O43852-8;O43852-9	CALU_HUMAN	CALU	Calumenin		543.678
O43865	O43865	SAHH2_HUMAN	AHCYL1	S-adenosylhomocysteine hydrolase-like protein 1	8253.28	9721.54	8068.52	8567.86	9366.19	9444.92	9909.83	9280.55
O60216	O60216	RAD21_HUMAN	RAD21	Double-strand-break repair protein rad21 homolog	968.748	812.886	725.98	1151.94	745.554	812.991	1069.35	699.521
O60231	O60231	DHX16_HUMAN	DHX16	Pre-mRNA-splicing factor ATP-dependent RNA helicase DHX16	4117.86	3162.08	5053.42	3973.63	4820.28	4772.19	4218.13	4489.92
O60244	O60244	MED14_HUMAN	MED14	Mediator of RNA polymerase II transcription subunit 14				327.32		664.255	705.423	594.336
O60256;O60256-3	O60256;O60256-2;O60256-3;O60256-4	KPRB_HUMAN	PRPSAP2	Phosphoribosyl pyrophosphate synthase-associated protein 2	3213.35	2854.7	3261.97	3012.7	2411.84	2228.16	3738.72	3457.34
O60264	O60264;P28370;P28370-2	SMCA5_HUMAN	SMARCA5	SWI/SNF-related matrix-associated actin-dependent regulator of chromatin subfamily A member 5	2672.51	2768.78	2676.65	2663.46	3186.9	3075.03	2823.35	2919.97
O60271;O60271-3;O60271-4;O60271-5;O60271-9	O60271;O60271-3;O60271-5;O60271-4;O60271-9	JIP4_HUMAN	SPAG9	C-Jun-amino-terminal kinase-interacting protein 4	1075.63	2306.53	1361.98	797.104	975.279	1041.47	1371.95	1247.9
O60294	O60294	TYW4_HUMAN	LCMT2	tRNA wybutosine-synthesizing protein 4	677.4	631.305	619.798	1192.34	787.238	740.905	973.449	964.369
O60306	O60306	AQR_HUMAN	AQR	RNA helicase aquarius	2191.55	2449.87	2920.17	2270	2363.52	3304.16	2851.89	2374.63
O60313;O60313-10;O60313-11;O60313-13;O60313-2;O60313-9	O60313;O60313-10;O60313-2;O60313-9;O60313-11;O60313-13	OPA1_HUMAN	OPA1	Dynamin-like 120 kDa protein, mitochondrial	1715.87	1547.9	2036.97	2097.15	1682.42	1453.58	1476.86	1469.88
O60333;O60333-2;O60333-4	O43896;O60333;O60333-2;Q12756;O60333-3;O60333-4;Q12756-2;Q12756-3	KIF1B_HUMAN	KIF1B	Kinesin-like protein KIF1B	1991.6	2066.6	3937.15	3005.99	3328.85	3019.61	3787.49	3284.3
O60341;O60341-2	O60341;O60341-2	KDM1A_HUMAN	KDM1A	Lysine-specific histone demethylase 1A	4019.36	4786.02	4231.83	4711.45	4584.76	4564.29	3900.88	4228.5
O60488;O60488-2	O60488;O60488-2	ACSL4_HUMAN	ACSL4	Long-chain-fatty-acid--CoA ligase 4	1825.44	2147.16			2479.26			2233.3
O60493;O60493-3;O60493-4	O60493;O60493-3;O60493-4	SNX3_HUMAN	SNX3	Sorting nexin-3	2134.68	1769.99	1895.2	1983.36	1438.68	1571.49	1895.38	2059.13
O60502;O60502-2;O60502-4	O60502;O60502-2;O60502-4	OGA_HUMAN	OGA	Protein O-GlcNAcase	3251.58	4163.45	4491.59	4871.51	4302.89	5620.59	4830.72	4936.1
O60506;O60506-2;O60506-3;O60506-4	O60506;O60506-4;O60506-2;O60506-3	HNRPQ_HUMAN	SYNCRIP	Heterogeneous nuclear ribonucleoprotein Q	5293.38	4584.25	5382.36	4331.38	5424.35	3877.15	5810.14	3713.49
O60524;O60524-3;O60524-4;O60524-5	O60524;O60524-2;O60524-3;O60524-4;O60524-5	NEMF_HUMAN	NEMF	Ribosome quality control complex subunit NEMF	2611.55	1823.5	2551.81	2430.85	2477.28	2431.04	2367.9	2491.51
O60547;O60547-2	O60547;O60547-2	GMDS_HUMAN	GMDS	GDP-mannose 4,6 dehydratase	1361.98	1624.69	1330.29	1565.79	1429.42	1971.09	1263.01	1924.15
O60563	O60563;O60563-2	CCNT1_HUMAN	CCNT1	Cyclin-T1	1193.62	1495.17	1487.85	2395.92	1920.27	2172.19	2364.03	1865.92
O60568	O60568	PLOD3_HUMAN	PLOD3	Multifunctional procollagen lysine hydroxylase and glycosyltransferase LH3	5000.14	4660.84	4964.34	4572.09	4468.79	5120.63	5096.46	5439.29
O60610;O60610-2;O60610-3	O60610;O60610-2;O60610-3	DIAP1_HUMAN	DIAPH1	Protein diaphanous homolog 1	4932.01	3848.29	5527.72	4651.32	4574.01	4481.32	5626.29	4203.19
O60645	O60645	EXOC3_HUMAN	EXOC3	Exocyst complex component 3	313.494	353.637	183.439			200.773	454.753
O60678	O60678;O60678-2	ANM3_HUMAN	PRMT3	Protein arginine N-methyltransferase 3	1302.2	1548.62	1755.01	1449.51	1443.27	1634.64	1670.58	1446.56
O60684	O60684	IMA7_HUMAN	KPNA6	Importin subunit alpha-7	6516.95	5553.99	5850.69	5752.21	5606.67	5194.6	6557.03	4862.25
O60701	O60701;O60701-2;O60701-3	UGDH_HUMAN	UGDH	UDP-glucose 6-dehydrogenase	7235.12	7278.94	6489.49	7420.42	6812.36	6760.43	6630.48	6338.51
O60716;O60716-10;O60716-11;O60716-12;O60716-13;O60716-14;O60716-15;O60716-16;O60716-17;O60716-18;O60716-19;O60716-2;O60716-20;O60716-21;O60716-22;O60716-23;O60716-24;O60716-25;O60716-26;O60716-27;O60716-28;O60716-29;O60716-3;O60716-30;O60716-31;O60716-32;O60716-4;O60716-5;O60716-6;O60716-7;O60716-8;O60716-9	O60716;O60716-10;O60716-11;O60716-12;O60716-13;O60716-14;O60716-15;O60716-16;O60716-17;O60716-18;O60716-19;O60716-2;O60716-20;O60716-21;O60716-22;O60716-23;O60716-24;O60716-25;O60716-26;O60716-27;O60716-28;O60716-29;O60716-3;O60716-30;O60716-31;O60716-32;O60716-4;O60716-5;O60716-6;O60716-7;O60716-8;O60716-9	CTND1_HUMAN	CTNND1	Catenin delta-1	1860.96	1782.91	2202.75	1600.2	2834.68	1818.29	1976.53	1799.52
O60749	O60749;Q13596;O60749-2;Q13596-2	SNX2_HUMAN	SNX2	Sorting nexin-2	5600.89	4531.08	5701.32	4870.85	4736.42	5135.24	4941.07	5463.58
O60762	O60762	DPM1_HUMAN	DPM1	Dolichol-phosphate mannosyltransferase subunit 1	5862.23	6646.54	6065.87	7447.64	5654.89	6379.52	6141.18	5360.72
O60763;O60763-2	O60763;O60763-2	USO1_HUMAN	USO1	General vesicular transport factor p115	3195.54	2266.5	2890.37	1811.32	2663.69	1768.84	2842.99	2116.24
O60783	O60783	RT14_HUMAN	MRPS14	Small ribosomal subunit protein uS14m	1215.12	1316.95	732.713	1771.26	720.314	1266.87		1001.05
O60814;P06899;P23527;P33778;P57053;P58876;P62807;Q16778;Q5QNW6;Q5QNW6-2;Q8N257;Q93079;Q99877;Q99879;Q99880	O60814;P06899;P23527;P33778;P57053;P58876;P62807;Q16778;Q5QNW6;Q8N257;Q93079;Q96A08;Q99877;Q99879;Q99880;Q5QNW6-2	H2B1B_HUMAN;H2B1C_HUMAN;H2B1D_HUMAN;H2B1H_HUMAN;H2B1J_HUMAN;H2B1K_HUMAN;H2B1L_HUMAN;H2B1M_HUMAN;H2B1N_HUMAN;H2B1O_HUMAN;H2B2E_HUMAN;H2B2F_HUMAN;H2B3B_HUMAN;H2BFS_HUMAN	H2BC11;H2BC12;H2BC12L;H2BC13;H2BC14;H2BC15;H2BC17;H2BC18;H2BC21;H2BC26;H2BC3;H2BC4;H2BC5;H2BC9	Histone H2B type 1-K	813.173	731.355	832.88	821.401	1983.89	1081.31	989.191	987.047
O60832	O60832;O60832-2	DKC1_HUMAN	DKC1	H/ACA ribonucleoprotein complex subunit DKC1	333.705		279.907	434.646		798.364	601.909	704.939
O60841	O60841	IF2P_HUMAN	EIF5B	Eukaryotic translation initiation factor 5B	3484.27	3215.23	3485.93	3478.77	3612.88	2706.28	2965.43	3508.16
O60884	O60884	DNJA2_HUMAN	DNAJA2	DnaJ homolog subfamily A member 2	627.858	1047.06	765.244	1198.51	1277.29	673.592	804.068	1227.95
O60888;O60888-2;O60888-3	O60888;O60888-2;O60888-3	CUTA_HUMAN	CUTA	Protein CutA		1020.74
O60907;O60907-2	O60907;O60907-2	TBL1X_HUMAN	TBL1X	F-box-like/WD repeat-containing protein TBL1X	3560.34	4617.47	4240.39		4322.99	3434.99
O60942;O60942-2	O60942;O60942-2;O60942-3;O60942-4	MCE1_HUMAN	RNGTT	mRNA-capping enzyme	439.022	471.617	724.168	627.555	707.818	886.899	947.488	805.318
O75054	O75054;O75054-2	IGSF3_HUMAN	IGSF3	Immunoglobulin superfamily member 3	959.416	1406.04	1191.93	1632.94	1368.98	1870.09	1322.41	1992.55
O75063	O75063	XYLK_HUMAN	FAM20B	Glycosaminoglycan xylosylkinase	1903.12	2156.45	1997.76	1824.13	2205.16	1761.43	1851.51	2270.11
O75083	O75083	WDR1_HUMAN	WDR1	WD repeat-containing protein 1	27900.7	40872	26947	37055.8	27585.6	37165.6	27990.7	34806.2
O75116	O75116	ROCK2_HUMAN	ROCK2	Rho-associated protein kinase 2	1987.7	1874.49	2770.08	2216.02	2920.34	2660.38	2118.39	2323.72
O75131	O75131	CPNE3_HUMAN	CPNE3	Copine-3	22602.7	31395.3	24418.9	28594.2	24953.1	32564.4	26936.3	33979.6
O75146	O75146;O75146-2	HIP1R_HUMAN	HIP1R	Huntingtin-interacting protein 1-related protein			186.237					233.237
O75150;O75150-3;O75150-4	O75150;O75150-3;O75150-4	BRE1B_HUMAN	RNF40	E3 ubiquitin-protein ligase BRE1B	753.255	603.318		358.886	342.123	227.048	385.634	528.803
O75153	O75153	CLU_HUMAN	CLUH	Clustered mitochondria protein homolog	5567.15	5600.01	5844.25	5334.98	5979.3	6065.9	5707.04	5386.19
O75165	O75165	DJC13_HUMAN	DNAJC13	DnaJ homolog subfamily C member 13	2304.21	1631.78	2024.36	2040.01	1883.24	1880.56	2405.67	1965.99
O75190;O75190-2;O75190-3	O75190;O75190-2;O75190-3	DNJB6_HUMAN	DNAJB6	DnaJ homolog subfamily B member 6	4037.43	3995.09	3049.38	4182.65	5373.92	4339.24	3994.07	3848.93
O75223	O75223;O75223-3	GGCT_HUMAN	GGCT	Gamma-glutamylcyclotransferase	7934.49	10619.3	7620.29	9580.63	8707.36	11153.4	7867.31	11065.6
O75251;O75251-2	O75251;O75251-2	NDUS7_HUMAN	NDUFS7	NADH dehydrogenase [ubiquinone] iron-sulfur protein 7, mitochondrial	3365.89	5079.59	3082.39	4457.41	4494.42	4843.92	4650.27	4128.97
O75306;O75306-2	O75306;O75306-2	NDUS2_HUMAN	NDUFS2	NADH dehydrogenase [ubiquinone] iron-sulfur protein 2, mitochondrial	3471.29	6815.21	5580.48	6497.17	3048.97	3585.67	2895.53	3825.29
O75312	O75312	ZPR1_HUMAN	ZPR1	Zinc finger protein ZPR1	415.552	1183.71	454.673	1040.21	541.494	895.589		783.956
O75317	O75317	UBP12_HUMAN	USP12	Ubiquitin carboxyl-terminal hydrolase 12					2102.88	2486.92	1378.42	2141.39
O75340;O75340-2	O75340;O75340-2	PDCD6_HUMAN	PDCD6	Programmed cell death protein 6	1337.29	1691.07	1451.83	1377.08	1600.58	1129.01	1457	1414.76
O75351	O75351	VPS4B_HUMAN	VPS4B	Vacuolar protein sorting-associated protein 4B	5754.28	6450.16	6040.54	5219.2	5934.68	4376.51	5731.85	5873.54
O75352;O75352-2	O75352;O75352-2	MPU1_HUMAN	MPDU1	Mannose-P-dolichol utilization defect 1 protein	1444.27	1664.27	2307.22	2067.06	2746.66	1997.93	2730.5	1562.54
O75369;O75369-2;O75369-3;O75369-6;O75369-8;O75369-9	O75369;O75369-2;O75369-3;O75369-6;O75369-4;O75369-5;O75369-7;O75369-8;O75369-9	FLNB_HUMAN	FLNB	Filamin-B	11959	9919.16	11444.2	10178.3	10264.7	8766.03	10662.6	10974.1
O75382;O75382-2;O75382-4	O75382;O75382-2;O75382-4	TRIM3_HUMAN	TRIM3	Tripartite motif-containing protein 3	1795.22	2250.16	2344.09	2830.08	2527.84	2419.79	2410.41	2504.79
O75390	O75390	CISY_HUMAN	CS	Citrate synthase, mitochondrial	27050.6	21702.3	23087.3	24182	18301.7	21894.6	22726.2	24781.2
O75396	O75396	SC22B_HUMAN	SEC22B	Vesicle-trafficking protein SEC22b	1366.13	1585.92	1559	1572.19	962.277	1312.76	1643.06	1462.22
O75400;O75400-2;O75400-3	O75400;O75400-2;O75400-3	PR40A_HUMAN	PRPF40A	Pre-mRNA-processing factor 40 homolog A	1629.32	2983.28	1396.17	2120.28	1734.58	2204.75	2002.7	1828.29
O75419;O75419-2;O75419-3	O75419;O75419-2;O75419-3	CDC45_HUMAN	CDC45	Cell division control protein 45 homolog	649.771		1092.1			765.423		1274.96
O75436	O75436	VP26A_HUMAN	VPS26A	Vacuolar protein sorting-associated protein 26A	11751.1	15700.4	13432.4	16020.1	14379.9	14565.2	14314.4	16205.1
O75439	O75439	MPPB_HUMAN	PMPCB	Mitochondrial-processing peptidase subunit beta	7977.99	9158.17	7965.51	8751.99	8318.27	8136.1	8703.29	8164.87
O75489	O75489	NDUS3_HUMAN	NDUFS3	NADH dehydrogenase [ubiquinone] iron-sulfur protein 3, mitochondrial	2446.78	1513.27	2387.06	1685.76	1782.74	1951.5	1936.29	1810.11
O75494;O75494-2;O75494-3;O75494-4;O75494-5;O75494-6;Q8WXF0	O75494;Q8WXF0;O75494-2;O75494-3;O75494-4;O75494-5;O75494-6	SRS10_HUMAN;SRS12_HUMAN	SRSF10;SRSF12	Serine/arginine-rich splicing factor 10	589.588	484.07	1008.25	828.815	875.078	1206.77	927.465	484.445
O75530;O75530-2;O75530-3	O75530;O75530-2;O75530-3	EED_HUMAN	EED	Polycomb protein EED		479.411	592.663	446.625	423.002	539.793	505.071	582.93
O75531	O75531	BAF_HUMAN	BANF1	Barrier-to-autointegration factor	117.814		417.581	650.585				456.202
O75533	O75533	SF3B1_HUMAN	SF3B1	Splicing factor 3B subunit 1	2719.23	2556.19	3237.75	2750.66	3102.13	2986.49	3201.58	2845.11
O75534;O75534-2;O75534-3;O75534-4	O75534;O75534-2;O75534-3;O75534-4	CSDE1_HUMAN	CSDE1	Cold shock domain-containing protein E1	10559	10652.3	9765.18	10947.8	11029.8	11319.6	10021.8	11236
O75569;O75569-2;O75569-3	O75569;O75569-2;O75569-3	PRKRA_HUMAN	PRKRA	Interferon-inducible double-stranded RNA-dependent protein kinase activator A	2189.47	1856.68	2566.43	1979.68	1798.65	1912.48	1754.39	2000.51
O75582	O75582;O75582-2	KS6A5_HUMAN	RPS6KA5	Ribosomal protein S6 kinase alpha-5	361.378		291.162	296.856	633.573	435.894	536.8	190.035
O75608;O75608-2	O75608;O75608-2	LYPA1_HUMAN	LYPLA1	Acyl-protein thioesterase 1	4556.79	5680.38	5581.33	4360.61	3123.72	3961.19	4595.51	5239.2
O75616	O75616	ERAL1_HUMAN	ERAL1	GTPase Era, mitochondrial	977.309	862.168	723.723	558.374	697.802	839.236	1071.79	525.293
O75643	O75643;O75643-2	U520_HUMAN	SNRNP200	U5 small nuclear ribonucleoprotein 200 kDa helicase	5506.58	5236.41	5915.51	5570.91	5385.6	6381.44	6052.49	5673.69
O75663	O75663	TIPRL_HUMAN	TIPRL	TIP41-like protein	1143.62	1627.2	998.791	1237.24	891.063	989.192	1341.24	1040.87
O75688	O75688;P35813;O75688-2;O75688-4;O75688-5;P35813-2;P35813-3	PPM1B_HUMAN	PPM1B	Protein phosphatase 1B	2795.9	2914.62	2628.88	2556.99	2631.22	2928.36	3048.64	3319.69
O75694;O75694-2	O75694;O75694-2	NU155_HUMAN	NUP155	Nuclear pore complex protein Nup155	387.733	638.145	376.682	704.776	277.696	422.127	461.083	507.423
O75717	O75717;O75717-2	WDHD1_HUMAN	WDHD1	WD repeat and HMG-box DNA-binding protein 1	3150.36	2939.69	2704.21	3410.97	3054.98	3798.51	3286.43	3833.05
O75746;O75746-2	O75746;O75746-2	S2512_HUMAN	SLC25A12	Electrogenic aspartate/glutamate antiporter SLC25A12, mitochondrial	796.716	2192.42	3110.54	2845.47	1368.85	2568.34	1509.91	2190.24
O75794	O75794	CD123_HUMAN	CDC123	Cell division cycle protein 123 homolog	1760.25	627.743	1391.45	1106.28		1253.59	1868.01	1409.32
O75817	O75817	POP7_HUMAN	POP7	Ribonuclease P protein subunit p20	895.113	1153.17	756.667	964.846	1033.53	546.671	1252.46	766.871
O75818;O75818-2	O75818;O75818-2	RPP40_HUMAN	RPP40	Ribonuclease P protein subunit p40	335.042	716.19		385.049			612.991	241.597
O75821	O75821	EIF3G_HUMAN	EIF3G	Eukaryotic translation initiation factor 3 subunit G	2549.52	6646.56	6402.17	6647.89	4937.1	6869.09	4589.29	6419.87
O75844	O75844	FACE1_HUMAN	ZMPSTE24	CAAX prenyl protease 1 homolog	1064.79	1121.55	932.635	898.272	1048.04	965.147	1046.46	1266.74
O75874	O75874	IDHC_HUMAN	IDH1	Isocitrate dehydrogenase [NADP] cytoplasmic	21234.1	17144.8	15351.9	18518.7	14416.4	15542.5	15279.8	18926.9
O75915	O75915	PRAF3_HUMAN	ARL6IP5	PRA1 family protein 3	1216.84	1268.99	1153.56	1612.31	2295.17	1445.18	1628.4	1619.54
O75928;O75928-2;O75928-3	O75928;O75928-2;O75928-3	PIAS2_HUMAN	PIAS2	E3 SUMO-protein ligase PIAS2		291.866						414.905
O75955	O75955;O75955-2	FLOT1_HUMAN	FLOT1	Flotillin-1	3655.85	3491.17	3429.54	3388.18	4111.89	3813.46	3587.14	4345.2
O75964	O75964	ATP5L_HUMAN	ATP5MG	ATP synthase subunit g, mitochondrial	4689.66	2383.1	4811.49	3375.48	4861.69	3596.01	5262.47	2920.75
O76003	O76003	GLRX3_HUMAN	GLRX3	Glutaredoxin-3	320.231	363.436	462.773	665.346		306.687		320.17
O76021	O76021	RL1D1_HUMAN	RSL1D1	Ribosomal L1 domain-containing protein 1	637.431	1053.42	1768.23	1450.72	982.581	2540.29	1542.75	887.96
O76031	O76031	CLPX_HUMAN	CLPX	ATP-dependent Clp protease ATP-binding subunit clpX-like, mitochondrial	1754.21	1600.43	2463.26	1597.96	2431.25	1437.55	2463.51	1952.76
O76062	O76062;O76062-2	ERG24_HUMAN	TM7SF2	Delta(14)-sterol reductase TM7SF2	1889.05	1513.59	2117.99	1703.53	2792.72	2646.12	2225.54	2132.98
O76071	O76071	CIAO1_HUMAN	CIAO1	Probable cytosolic iron-sulfur protein assembly protein CIAO1	2813.42	4350.33	3655.4	5364.85	4101.36	5383.94	4295.61	4917.23
O76094;O76094-2	O76094;O76094-2	SRP72_HUMAN	SRP72	Signal recognition particle subunit SRP72	1274.68	1154.08	1422.11	1110.03	1431.1	1257.56	1580.29	1142.92
O94776	O94776;O94776-2	MTA2_HUMAN	MTA2	Metastasis-associated protein MTA2	4397.25	5044.43	5466.59	5078.58	5283.92	5434.23	5290.47	5517.32
O94782	O94782	UBP1_HUMAN	USP1	Ubiquitin carboxyl-terminal hydrolase 1					3349.38	3180.87	2903.06	3052.41
O94822;O94822-3	O94822;O94822-3	LTN1_HUMAN	LTN1	E3 ubiquitin-protein ligase listerin	733.633	695.652	1435.58	941.488	456.227	880.809	1458.05	908.602
O94832	O94832	MYO1D_HUMAN	MYO1D	Unconventional myosin-Id	1999.71	2833.51	2648.3	2254.35	1907.85	2245.11	2580	1981.35
O94855;O94855-2	O94855;O94855-2	SC24D_HUMAN	SEC24D	Protein transport protein Sec24D	783.872	953.522	723.779	1298.06	1272.01	913.51	953.924	678.828
O94874;O94874-2;O94874-3	O94874;O94874-2;O94874-3	UFL1_HUMAN	UFL1	E3 UFM1-protein ligase 1		496.118		217.126	605.47	589.752	622.081	335.282
O94903	O94903	PLPHP_HUMAN	PLPBP	Pyridoxal phosphate homeostasis protein	364.397	328.525	409.849		584.638	494.409	374.206	194.971
O94905	O94905	ERLN2_HUMAN	ERLIN2	Erlin-2	4756.36	4421.6	4633.55	4587.49	5507.77	6007.9	5316.39	4076.33
O94906;O94906-2	O94906;O94906-2	PRP6_HUMAN	PRPF6	Pre-mRNA-processing factor 6	3021.42	3403.67	3580.16	2951.04	3105.3	3005.78	3665.34	2656.91
O94915	O94915	FRYL_HUMAN	FRYL	Protein furry homolog-like	326.988	541.17	610.913	622.093		459.356	489.603
O94925;O94925-3	O94925;O94925-3	GLSK_HUMAN	GLS	Glutaminase kidney isoform, mitochondrial			1780.41					1045.31
O94966-5	O94966;O94966-2;O94966-3;O94966-4;O94966-5;O94966-6;O94966-7	UBP19_HUMAN	USP19	Isoform 5 of Ubiquitin carboxyl-terminal hydrolase 19	1164.27	1978.97	1613.6	2342.79	35146.6	34217.9	29633.5	29489.7
O94973;O94973-2	O94973;O94973-2	AP2A2_HUMAN	AP2A2	AP-2 complex subunit alpha-2	2666.4	3448.32	2355.76	3929.41	3213.08	2678.94	2610.95	2797.29
O94979;O94979-10;O94979-2;O94979-3;O94979-4;O94979-6;O94979-8;O94979-9	O94979;O94979-10;O94979-2;O94979-3;O94979-4;O94979-5;O94979-6;O94979-7;O94979-8;O94979-9	SC31A_HUMAN	SEC31A	Protein transport protein Sec31A	8823.92	7945.73	6980.46	6841.96	6447.91	8400.23	8293.04	8514.13
O95049;O95049-3;O95049-4;O95049-5	O95049;O95049-3;O95049-4;O95049-5	ZO3_HUMAN	TJP3	Tight junction protein ZO-3	3775.7	4719.87	1543.14	3043.83			3594.49	3413.82
O95059	O95059	RPP14_HUMAN	RPP14	Ribonuclease P protein subunit p14		644.165	269.094	656.812				557.694
O95070	O95070	YIF1A_HUMAN	YIF1A	Protein YIF1A	795.318	997.487	433.639	582.577	1125.58	920.69	769.381	530.94
O95071;O95071-2	O95071;O95071-2	UBR5_HUMAN	UBR5	E3 ubiquitin-protein ligase UBR5	4200.49	4099.02	4792.54	4208.94	4996.71	5345.63	5501	4990.47
O95104;O95104-2;O95104-3;Q9UPN6;Q9UPN6-2	O95104;Q9UPN6;O95104-2;O95104-3;Q9UPN6-2	SCAF4_HUMAN;SCAF8_HUMAN	SCAF4;SCAF8	SR-related and CTD-associated factor 4						235.399		190.761
O95155;O95155-2;O95155-3;O95155-4	O95155;O95155-2;O95155-3;O95155-4	UBE4B_HUMAN	UBE4B	Ubiquitin conjugation factor E4 B	1415.32	1752.57	1521.54	1207.48	827.923	1362.81	1523.84	1608.6
O95163	O95163	ELP1_HUMAN	ELP1	Elongator complex protein 1	2260.74	2314.33	2079.72	2107.11	2570.73	1755.06	2454.11	2952.26
O95164	O95164	UBL3_HUMAN	UBL3	Ubiquitin-like protein 3	1173.24	1378.78	775.557	1544.39	807.887	1471.93	1208.49	1417.27
O95168;O95168-2	O95168;O95168-2	NDUB4_HUMAN	NDUFB4	NADH dehydrogenase [ubiquinone] 1 beta subcomplex subunit 4	1733.14	954.642	1483.15	1078.39	1255.93	921.374	1297.1	714.7
O95218;O95218-2	O95218;O95218-2	ZRAB2_HUMAN	ZRANB2	Zinc finger Ran-binding domain-containing protein 2	2336.93	3666.56	1780.23	2821.98	2962.43	2284.35	2160.45	2034.4
O95239;O95239-2	O95239;Q2VIQ3;O95239-2	KIF4A_HUMAN	KIF4A	Chromosome-associated kinesin KIF4A	1344.28	782.818	1589.7	1580.89	1231.25	1712.79	1694.68	1281.17
O95299;O95299-2	O95299;O95299-2	NDUAA_HUMAN	NDUFA10	NADH dehydrogenase [ubiquinone] 1 alpha subcomplex subunit 10, mitochondrial	1538.57	1508.78	2142.13	1791.39	1915.47	1991.51	1759.37	1668
O95336	O95336	6PGL_HUMAN	PGLS	6-phosphogluconolactonase	1280.19	1698.36	1614.01	2157.89	1587.29	1200.95	1949.1	1254.35
O95340;O95340-2	O95340;O95340-2	PAPS2_HUMAN	PAPSS2	Bifunctional 3'-phosphoadenosine 5'-phosphosulfate synthase 2	1632.84	2373.08	1948.09	1192.23	1846.1	1588.62	1669.87	1664.7
O95347	O95347;O95347-2	SMC2_HUMAN	SMC2	Structural maintenance of chromosomes protein 2	5384.38	5221.01	5558.61	4428.05	4777.64	5071.19	5128.15	5286.77
O95352	O95352;O95352-2;O95352-3	ATG7_HUMAN	ATG7	Ubiquitin-like modifier-activating enzyme ATG7	3287.85	2694.62	3618.23	3114.3	3700.31	3288.79	3711.41	2994.88
O95361	O95361;O95361-2;Q309B1	TRI16_HUMAN	TRIM16	Tripartite motif-containing protein 16	826.697	1450.85	1236.96	1550.89	918.207	915.706	911.093	1129.95
O95363	O95363	SYFM_HUMAN	FARS2	Phenylalanine--tRNA ligase, mitochondrial	2183.76	1858.82	2275.33	1553.22	2038.22	1542.47	2034.14	1691.86
O95373	O95373	IPO7_HUMAN	IPO7	Importin-7	4513.85	3608.06	5107.97	3754.88	5605.07	2994.13	5976.66	3385.63
O95394;O95394-3;O95394-4	O95394;O95394-3;O95394-4	AGM1_HUMAN	PGM3	Phosphoacetylglucosamine mutase	604.107	590.613	584.698	270.424		548.839		328.963
O95396	O95396	MOCS3_HUMAN	MOCS3	Adenylyltransferase and sulfurtransferase MOCS3	1253.53	1667.25	1218.85	1123.33	1676.74	1158.3	1144	1418.56
O95433;O95433-2	O95433;O95433-2	AHSA1_HUMAN	AHSA1	Activator of 90 kDa heat shock protein ATPase homolog 1	27118.8	31889.1	29051.9	28341	29678.2	27319.7	30310.7	29481.7
O95456;O95456-2	O95456;O95456-2	PSMG1_HUMAN	PSMG1	Proteasome assembly chaperone 1	8938.87	11400.8	10213.8	9705.85	12512.2	10927.3	11743.5	10528.8
O95470	O95470	SGPL1_HUMAN	SGPL1	Sphingosine-1-phosphate lyase 1	2095.59	2070.71	2571.72	1396.8	2342.52	1700.6	2139.58	1908.4
O95471;O95471-2	O95471;O95471-2	CLD7_HUMAN	CLDN7	Claudin-7	745.513	882.576	630.279	580.521	653.181	418.828	560.997	615.415
O95486	O95486;O95486-2	SC24A_HUMAN	SEC24A	Protein transport protein Sec24A	745.704	684.384	563.441	830.852	559.366	758.867	787.213	799.503
O95487;O95487-2;O95487-3	O95487;O95487-2;O95487-3	SC24B_HUMAN	SEC24B	Protein transport protein Sec24B	2208.42	2695.08	2140.36	3036.38	2324.93	2846.68	2148.28	3058.05
O95551;O95551-2	O95551;O95551-2	TYDP2_HUMAN	TDP2	Tyrosyl-DNA phosphodiesterase 2	2765.85	3112.15	2485.7	3099.2	2710.99	2608.95	2519.59	2788.17
O95573	O95573	ACSL3_HUMAN	ACSL3	Fatty acid CoA ligase Acsl3	4005.48	3816.48	3591.4	4280.07	3709.69	3499.63	4163.95	3252.96
O95602	O95602	RPA1_HUMAN	POLR1A	DNA-directed RNA polymerase I subunit RPA1	1222	1318.65	1320.92	877.029	1212.07	658.859	837.965	1154.23
O95671;O95671-2	O95671;O95671-2;O95671-3	ASML_HUMAN	ASMTL	Probable bifunctional dTTP/UTP pyrophosphatase/methyltransferase protein	1289.49	1137.42	1013.05	758.394	839.542	785.987	994.524	1567.39
O95685	O95685	PPR3D_HUMAN	PPP1R3D	Protein phosphatase 1 regulatory subunit 3D	1204.36	1424.71	1416.69	1369.4	2080.32	1805.24	1632.9	1546.56
O95707	O95707	RPP29_HUMAN	POP4	Ribonuclease P protein subunit p29		926.283	787.988	922.678	1234.54	962.57	1045.59	777.057
O95714	O95714;Q9BVR0	HERC2_HUMAN	HERC2	E3 ubiquitin-protein ligase HERC2	499.147		630.008	648.834	1009.47	1002.18	788.752	714.836
O95716	O95716;P20337;Q96E17	RAB3D_HUMAN	RAB3D	Ras-related protein Rab-3D	10955.3	12648	10705.3	12969.4	18170.7	12043.7	10622.2	12482.3
O95747	O95747	OXSR1_HUMAN	OXSR1	Serine/threonine-protein kinase OSR1	2399.86	1892.01	1294.8	2270.82	2217.17	1667.18	1702.21	1466.36
O95757	O95757	HS74L_HUMAN	HSPA4L	Heat shock 70 kDa protein 4L	7650.04	5608.42	6399.82	5621.3	5546.69	6288.05	6715.26	6224.58
O95758;O95758-1;O95758-2;O95758-4;O95758-5;O95758-6;O95758-7	O95758;O95758-1;O95758-2;O95758-4;O95758-5;O95758-6;O95758-7	PTBP3_HUMAN	PTBP3	Polypyrimidine tract-binding protein 3	1337.04	1102.58	1180.17		1556.48	1359.33	1242.33	1110.26
O95782;O95782-2	O94973;O95782;O94973-2;O94973-3;O95782-2	AP2A1_HUMAN	AP2A1	AP-2 complex subunit alpha-1	6733.24	6593.69	6852.41	6622.89	6618.16	7290.66	7085.14	7388.73
O95793;O95793-2	O95793;O95793-2;O95793-3	STAU1_HUMAN	STAU1	Double-stranded RNA-binding protein Staufen homolog 1	2403.26	2105.82	2060.64	2238.52	2680.04	2597.34	2718.83	1782.84
O95816	O95816;O95816-2	BAG2_HUMAN	BAG2	BAG family molecular chaperone regulator 2	1548.4	1322.22	1506.56	931.432	876.384	1339.83	1307.5	1154.37
O95817	O95817	BAG3_HUMAN	BAG3	BAG family molecular chaperone regulator 3	934.425	1288.08	639.249	939.084	1387.77		685.291	864.344
O95822;O95822-2	O95822;O95822-2	DCMC_HUMAN	MLYCD	Malonyl-CoA decarboxylase, mitochondrial	1307.61	1386.1	1404.78	1589.91	1218.97	1570.77	1126.49	1066.12
O95831;O95831-3	O95831;O95831-3;O95831-5;O95831-2	AIFM1_HUMAN	AIFM1	Apoptosis-inducing factor 1, mitochondrial	6204.55	6854.55	5394.39	6838.09	6121.53	7011.49	5916.36	8082.8
O95834;O95834-2;O95834-3	O95834;O95834-2;O95834-3	EMAL2_HUMAN	EML2	Echinoderm microtubule-associated protein-like 2	2286.18	2716.57	2044.56	2213.8	1855.97	2336.87	1294.4	2480.72
O95861;O95861-4	O95861;O95861-2;O95861-4	BPNT1_HUMAN	BPNT1	3'(2'),5'-bisphosphate nucleotidase 1	2200.11	2107.21	1689.98	2219.68	1844.05	2160.23	1902.53	2231.79
O95865	O95865	DDAH2_HUMAN	DDAH2	N(G),N(G)-dimethylarginine dimethylaminohydrolase 2	1361.77	1477.31	1267.99	1060	1265.09	761.321	722.184	1069.87
O95870;O95870-2	O95870;O95870-2	ABHGA_HUMAN	ABHD16A	Phosphatidylserine lipase ABHD16A	2075.81	2095.84	2048.99	1555.76	1806.57	2214.5	1850.56	1948.21
O95970;O95970-2;O95970-3	O95970;O95970-2;O95970-3	LGI1_HUMAN	LGI1	Leucine-rich glioma-inactivated protein 1	4297.03	13555.8	7594.14	12802	6148.92	5393.47	3779.55	11128.7
O95989	O95989	NUDT3_HUMAN	NUDT3	Diphosphoinositol polyphosphate phosphohydrolase 1	6478.69	7359.06	7058.73	7406.47	10437.2	12841.5	7758.71	8891.99
O95994	O95994	AGR2_HUMAN	AGR2	Anterior gradient protein 2 homolog	1080.89	596.856		901.552				742.157
O96000;O96000-2	O96000;O96000-2	NDUBA_HUMAN	NDUFB10	NADH dehydrogenase [ubiquinone] 1 beta subcomplex subunit 10	824.342	994.101	493.142	531.625	335.829	498.466	497.99	504.231
O96005;O96005-3;O96005-4	O96005;O96005-3;O96005-4	CLPT1_HUMAN	CLPTM1	Putative lipid scramblase CLPTM1	453.604	1095.74	1206.25	2360.27	1066.21	1651.99	1558.27	1915.79
O96007	O96007	MOC2B_HUMAN	MOCS2	Molybdopterin synthase catalytic subunit	1369.41	730.27	823.675	621.326	1239.8	1122.69	1433.16	1069.98
O96008	O96008;O96008-2	TOM40_HUMAN	TOMM40	Mitochondrial import receptor subunit TOM40 homolog	6187.78	7980.69	6077.71	7315.3	6781.82	7233.81	7140.18	6978.48
O96011;O96011-2	O96011;O96011-2	PX11B_HUMAN	PEX11B	Peroxisomal membrane protein 11B						371.497		548.493
O96013;O96013-2;O96013-3;O96013-4	O96013;O96013-2;O96013-3;O96013-4	PAK4_HUMAN	PAK4	Serine/threonine-protein kinase PAK 4	3148.03	2834.48	3641.88	2511.02	2983.32	3723.57	3659.75	3178.69
O96017;O96017-12;O96017-13;O96017-4;O96017-9	O96017;O96017-12;O96017-13;O96017-4;O96017-9	CHK2_HUMAN	CHEK2	Serine/threonine-protein kinase Chk2	2720.24	1722.54	3080.16	2524.04	1736.77	2009.5	2597.56
O96019;O96019-2	O96019;O96019-2	ACL6A_HUMAN	ACTL6A	Actin-like protein 6A	4319.38	5450.6	4901.62	5193.09	3529.05	6094.9	5011	5392.97
P00338;P00338-3	P00338;P00338-3;P00338-4	LDHA_HUMAN	LDHA	L-lactate dehydrogenase A chain	50965	45598.3	49227.2	45115.5	48242.7	49517.3	48804	49640.1
P00367	P00367;P49448;P00367-3	DHE3_HUMAN	GLUD1	Glutamate dehydrogenase 1, mitochondrial	10564.5	11911.7	10963.8	11614.2	11145.1	10577.7	11645.9	10967
P00374	P00374	DYR_HUMAN	DHFR	Dihydrofolate reductase	9982.96	10999.7	7905.52	10042.2	10606.8	9729.36	10368.2	11053.1
P00387;P00387-2;P00387-3	P00387;P00387-2;P00387-3	NB5R3_HUMAN	CYB5R3	NADH-cytochrome b5 reductase 3	166633	247386	140618	199969	185327	167007	158939	236996
P00390;P00390-2;P00390-3	P00390;P00390-2;P00390-3;P00390-4;P00390-5	GSHR_HUMAN	GSR	Glutathione reductase, mitochondrial	11476.1	13018	11742.1	12149.6	11363.3	13563.5	12533.7	10975.3
P00395	P00395	COX1_HUMAN	MT-CO1	Cytochrome c oxidase subunit 1	2659.59	4019.06	2856.59	4925.31	3222.99	4786.81	4012.39	3892
P00403	P00403	COX2_HUMAN	MT-CO2	Cytochrome c oxidase subunit 2	32728.2	38371.9	34108.5	40235.9	35273.5	30386.1	34681.1	43015.7
P00441	P00441	SODC_HUMAN	SOD1	Superoxide dismutase [Cu-Zn]		3599.04		1740.13
P00491	P00491	PNPH_HUMAN	PNP	Purine nucleoside phosphorylase	8023.09	11855.4	9026.43	12154	8992.07	12953.1	9278.94	11301.1
P00492	P00492	HPRT_HUMAN	HPRT1	Hypoxanthine-guanine phosphoribosyltransferase	6300.51	5799.44	5235.38	6337.48	5603.78	6874.22	5496.63	7933.32
P00505	P00505;P00505-2	AATM_HUMAN	GOT2	Aspartate aminotransferase, mitochondrial	7122.08	7642.95	8404.63	8327.03	6051.44	7053.86	6208.82	9714.93
P00558	P00558;P00558-2	PGK1_HUMAN	PGK1	Phosphoglycerate kinase 1	16435.5	14971.5	16089	15579	13549.8	14608.4	15326.8	16142.3
P00568	P00568	KAD1_HUMAN	AK1	Adenylate kinase isoenzyme 1	5171.54	5338.08	5457.11	4482.84	4241.07	3958.88	4702.7	4713.1
P00736	P00736	C1R_HUMAN	C1R	Complement C1r subcomponent	868.038	1203.41	656.358	1175.11	1459.62	1065.06	1122.02	810.22
P00846	P00846	ATP6_HUMAN	MT-ATP6	ATP synthase subunit a	3440.06	4058.2	3489.99	4236.83	4970.09	4680.43	5297.95	4740.92
P00966	P00966	ASSY_HUMAN	ASS1	Argininosuccinate synthase	29670.3	29185.8	25713.6	27953.9	30430.5	30763.8	28263.7	27684.4
P01024	P01024	CO3_HUMAN	C3	Complement C3	13572.7	21127.5	14555.1	19462.1	17266	17080.3	15332	15543
P01036	P01036;P01037;P09228	CYTS_HUMAN	CST4	Cystatin-S		5695.81
P01111	P01111;P01112	RASN_HUMAN	NRAS	GTPase NRas	24897	25936.2	21202.3	26144.4	27537.7	27306.7	21026.9	24903.7
P01112-2	P01112;P01112-2	RASH_HUMAN	HRAS	Isoform 2 of GTPase HRas	1914.67	2551.19	3072.46	2334.22	3142.09	2541.96	2313.86	3251.01
P01116-2	P01112;P01116;P01116-2;P01112-2	RASK_HUMAN	KRAS	Isoform 2B of GTPase KRas	881.049	958.637	689.83	958.658	846.333	776.446	1003.38	1110.36
P01619	P01619	KV320_HUMAN	IGKV3-20	Immunoglobulin kappa variable 3-20	4232.91	4424.51	3322.82	3518.82	5208.34	3811.33	2887.79	2144.83
P01859;P01859-1	P01859;P01859-1	IGHG2_HUMAN	IGHG2	Immunoglobulin heavy constant gamma 2	118658	172417	120175	140416	131609	127299	117165	119955
P01860;P01860-1	P01860;P01860-1	IGHG3_HUMAN	IGHG3	Immunoglobulin heavy constant gamma 3	5347.74	9358.34	8935.83	5803.3	8168.72	5521.44	2466.78	2726.03
P01876;P01876-1	P01876;P01876-1	IGHA1_HUMAN	IGHA1	Immunoglobulin heavy constant alpha 1		2687.43
P02042;P02100;P68871;P69891;P69892	P02042;P02100;P68871;P69891;P69892	HBB_HUMAN;HBD_HUMAN;HBE_HUMAN;HBG1_HUMAN;HBG2_HUMAN	HBB;HBD;HBE1;HBG1;HBG2	Hemoglobin subunit delta	3202.71	3645.93	4107.47	4749.79	5795.78	5257.27	5044.64	3856.39
P02533	P02533	K1C14_HUMAN	KRT14	Keratin, type I cytoskeletal 14	2510.83	7005.6	977.087	1168.95	948.466	3914.77	1399.7	1934.01
P02538;P04259;P48668	P02538;P04259;P48668	K2C6A_HUMAN;K2C6B_HUMAN;K2C6C_HUMAN	KRT6A;KRT6B;KRT6C	Keratin, type II cytoskeletal 6A		2107.25	737.36			851.072	1900.27	1525.97
P02679;P02679-2	P02679;P02679-2	FIBG_HUMAN	FGG	Fibrinogen gamma chain	3250.09	3029.45	5392.53	7001.54	5885.3	5898.02	5723.83	6059.24
P02745	P02745	C1QA_HUMAN	C1QA	Complement C1q subcomponent subunit A	24586.3	35983.5	25239.5	33094.7	28186.8	28644.2	27802	27852.2
P02746	P02746	C1QB_HUMAN	C1QB	Complement C1q subcomponent subunit B	46416.4	124061	78831.3	108489	75183.5	87166.7	79334.5	91160.3
P02768	P02768;P02768-3	ALBU_HUMAN	ALB	Albumin	4060.56	6578.9	4381.49	5168.24	5656.65	4990.75	5155.93	5308.92
P02786	P02786	TFR1_HUMAN	TFRC	Transferrin receptor protein 1	19825.2	24252.8	19478.5	24175.6	18867.7	24785.6	21097.4	29044.8
P02788;P02788-2	P02788;P02788-2	TRFL_HUMAN	LTF	Lactotransferrin	2896.44	3841.37	2560.1	3005.72	2617.7	2814.96	2196.76	1436.68
P03891	P03891	NU2M_HUMAN	MT-ND2	NADH-ubiquinone oxidoreductase chain 2		313.273	1005.35	474.848	778.968	1164.19	976.233	1079.46
P04075	P04075;P09972;P04075-2	ALDOA_HUMAN	ALDOA	Fructose-bisphosphate aldolase A	43817.3	54924.9	45319.9	62453.6	42838	58934.8	49247.6	61903.7
P04080	P04080	CYTB_HUMAN	CSTB	Cystatin-B	833.94	2757.1	634.717	1418.08	720.469	853.401		674.479
P04181	P04181;P04181-2	OAT_HUMAN	OAT	Ornithine aminotransferase, mitochondrial	1833.59	1495.86	1947.18	1995.67	1703.67	1599.05	1697.54	2261.65
P04183	P04183	KITH_HUMAN	TK1	Thymidine kinase, cytosolic	2738.61	3117.08	2914.43	2594.02	2713.61	3317.87	3274.2	2416.49
P04264	P04259;P04264	K2C1_HUMAN	KRT1	Keratin, type II cytoskeletal 1	104562	206665	22864.3	39825	20129.4	102386	31428.2	66858.6
P04406;P04406-2	P04406;P04406-2	G3P_HUMAN	GAPDH	Glyceraldehyde-3-phosphate dehydrogenase	489308	610134	453351	554727	476995	635143	466959	702516
P04792	P04792	HSPB1_HUMAN	HSPB1	Heat shock protein beta-1	122695	172272	110647	136724	125915	111705	111641	115756
P04843	P04843	RPN1_HUMAN	RPN1	Dolichyl-diphosphooligosaccharide--protein glycosyltransferase subunit 1	12374.1	14188.2	13256.8	13125.8	13898.3	14233.3	12181.5	13537.6
P04844;P04844-2	P04844;P04844-2	RPN2_HUMAN	RPN2	Dolichyl-diphosphooligosaccharide--protein glycosyltransferase subunit 2	12057.9	13697.2	13412.8	12587.2	13373.6	10672	12514.3	12991
P04899-2;P04899-3;P04899-5;P04899-6	P04899;P04899-2;P04899-3;P04899-4;P04899-5;P04899-6	GNAI2_HUMAN	GNAI2	Isoform 2 of Guanine nucleotide-binding protein G(i) subunit alpha-2	6142.41	6811.91	5904.81	6078.64	5536.46	4790.15	6273.05	6808.33
P05023;P05023-3;P05023-4	P05023;P05023-3;P05023-4	AT1A1_HUMAN	ATP1A1	Sodium/potassium-transporting ATPase subunit alpha-1	12094.5	10370.6	10765.6	10536	10510.5	9578.26	10858.6	9998.09
P05026;P05026-2	P05026;P05026-2	AT1B1_HUMAN	ATP1B1	Sodium/potassium-transporting ATPase subunit beta-1	3518.69	4135.43	2700.33	3192.86	1292.67	3118.85	3262.59	3635.75
P05089;P05089-2	P05089;P05089-2	ARGI1_HUMAN	ARG1	Arginase-1		2556.2				547.031		952.289
P05109	P05109	S10A8_HUMAN	S100A8	Protein S100-A8		6492.9	1601.44	8563.54	338.264	4549.49	1130.91	819.816
P05141	P05141;P12235;P12236;Q9H0C2	ADT2_HUMAN	SLC25A5	ADP/ATP translocase 2	138049	141067	144478	140984	162183	145660	148331	123600
P05165;P05165-2	P05165;P05165-2	PCCA_HUMAN	PCCA	Propionyl-CoA carboxylase alpha chain, mitochondrial	889.703	1284.69	907.79	899.783	1053.71	1324.08	837.289	1276.51
P05166;P05166-2	P05166;P05166-2	PCCB_HUMAN	PCCB	Propionyl-CoA carboxylase beta chain, mitochondrial	645.683	465.393	683.87	153.007	602.585	314.434		397.992
P05198	P05198	IF2A_HUMAN	EIF2S1	Eukaryotic translation initiation factor 2 subunit 1	16277.7	18109.2	17484.7	16563.1	16275.3	16552.7	16789.5	19088.8
P05387	P05387	RLA2_HUMAN	RPLP2	Large ribosomal subunit protein P2	1334.53	13017.1	1468.87	5941.88	1484.11	821.76	1041.57	1260.68
P05388	P05388;P05388-2	RLA0_HUMAN	RPLP0	Large ribosomal subunit protein uL10	23338.6	21359.5	28332.2	17948.4	20542.2	16957.3	23368.6	19184.4
P05455	P05455	LA_HUMAN	SSB	Lupus La protein	1349.36	1835.17	1260.85	1297.59	1223.82	1366.85	1520.22	1346.01
P05556	P05556	ITB1_HUMAN	ITGB1	Integrin beta-1	2915.27	3253.1	3000.82	3386.74	2801.65	3283.74	2970.07	3759.01
P05783	P05783	K1C18_HUMAN	KRT18	Keratin, type I cytoskeletal 18	147381	130048	143639	136959	116949	128737	127920	133249
P05787;P05787-2	P05787;P05787-2	K2C8_HUMAN	KRT8	Keratin, type II cytoskeletal 8	325524	306137	320021	309613	254144	286855	276068	291645
P06132	P06132	DCUP_HUMAN	UROD	Uroporphyrinogen decarboxylase	920.942	806.13	621.924	780.468	1227.41	868.519		768.904
P06312	P06312	KV401_HUMAN	IGKV4-1	Immunoglobulin kappa variable 4-1	99707.4	182255	115979	182348	125376	175422	118033	161488
P06396;P06396-2;P06396-3;P06396-4	P06396;P06396-2;P06396-3;P06396-4	GELS_HUMAN	GSN	Gelsolin		1248.29	543.972	397.226	426.205	596.741	515.468	884.356
P06400	P06400	RB_HUMAN	RB1	Retinoblastoma-associated protein	1062.5	670.917	978.389	1082.36	1052.65	1193	842.217	549.645
P06401;P06401-2;P06401-3;P06401-4;P06401-5	P06401;P06401-2;P06401-3;P06401-4;P06401-5	PRGR_HUMAN	PGR	Progesterone receptor		1525.23	1497.85	2225.71	1519.35
P06493;P06493-2	P06493;P06493-2	CDK1_HUMAN	CDK1	Cyclin-dependent kinase 1	3625.38	3479.63	4561.74	4463.28	4120.82	4275.5	4107.52	4141.25
P06576	P06576	ATPB_HUMAN	ATP5F1B	ATP synthase subunit beta, mitochondrial	32627.2	28190.5	32649.3	29196.1	27831.9	25917.9	29352.4	29994.7
P06702	P06702	S10A9_HUMAN	S100A9	Protein S100-A9		2644.75	298.532	3158.12		1842.51	869.652	335.288
P06703	P06703	S10A6_HUMAN	S100A6	Protein S100-A6		230.386		215.466				11.1472
P06730;P06730-2;P06730-3	P06730;P06730-2;P06730-3	IF4E_HUMAN	EIF4E	Eukaryotic translation initiation factor 4E	7697.68	9237.27	6882.62	6039.66	6651.9	8439.06	6267.98	5218.66
P06733	P06733;P06733-2	ENOA_HUMAN	ENO1	Alpha-enolase	60080.9	59550	54490.9	59150.9	47696.3	55917.7	45620.2	59622.8
P06744;P06744-2	P06744;P06744-2	G6PI_HUMAN	GPI	Glucose-6-phosphate isomerase	25625.4	28487.3	25795	29547.5	20368.8	26666.2	24263.8	32029.5
P06748;P06748-2	P06748;P06748-2;P06748-3	NPM_HUMAN	NPM1	Nucleophosmin	1149.05	3290.13	1472.94	3234.04	556.494	1130.35	1361.16	2150.84
P06753-2;P06753-3;P06753-4;P06753-5;P06753-6	P06753;P07951;P09493;P09493-10;P67936;P07951-2;P09493-5;P06753-2;P06753-3;P09493-2;P09493-3;P09493-4;P09493-6;P09493-7;P09493-8;P09493-9;P06753-4;P06753-5;P06753-6;P07951-3;P67936-2	TPM3_HUMAN	TPM3	Isoform 2 of Tropomyosin alpha-3 chain	4444.3	11281.9	3439.99	8237.33	3139.85	2822.25	3094.17	2280.4
P06865	P06865;P06865-2	HEXA_HUMAN	HEXA	Beta-hexosaminidase subunit alpha	1331.35	1702.18	2204.33	2288.89	1585.66	2444.36	1967.14	2042.61
P07099	P07099	HYEP_HUMAN	EPHX1	Epoxide hydrolase 1	523.721	398.814	747.163	858.005	407.826	958.94	721.347	1201.99
P07108;P07108-2;P07108-3;P07108-4;P07108-5	P07108;P07108-2;P07108-3;P07108-4;P07108-5	ACBP_HUMAN	DBI	Acyl-CoA-binding protein		3801.13		1649.07
P07195	P07195	LDHB_HUMAN	LDHB	L-lactate dehydrogenase B chain	455.72	469.634	249.527	442.153	741.463	280.557	225.09	128.191
P07237	P07237	PDIA1_HUMAN	P4HB	Protein disulfide-isomerase	1592.14	4889.2	1635.94	4185.02	1754.47	1397.05	1881.51	1650.02
P07339	P07339	CATD_HUMAN	CTSD	Cathepsin D	20658.4	28740.6	24030.7	27849.9	24440.3	27506	21812.1	26809.2
P07355;P07355-2	A6NMY6;P07355;P07355-2	ANXA2_HUMAN	ANXA2	Annexin A2	11710.3	9647.14	11710.3	9898.48	8581.22	8811.89	9681.49	9696.36
P07384	P07384	CAN1_HUMAN	CAPN1	Calpain-1 catalytic subunit	10687.8	9690.35	10358.2	9887.34	10103.1	11826.2	9930.68	11153.6
P07437	P04350;P07437;P68371	TBB5_HUMAN	TUBB	Tubulin beta chain	135622	126921	148905	132895	124937	116014	130400	125945
P07477	P07477	TRY1_HUMAN	PRSS1	Serine protease 1	35769.5	26533.8	45778.2	22317.9	44865.2	43863.3	39665.1	11632.8
P07737	P07737	PROF1_HUMAN	PFN1	Profilin-1	93040.2	95472.2	81573.4	93674.5	96934.3	96266.3	93936.2	92353.9
P07741	P07741	APT_HUMAN	APRT	Adenine phosphoribosyltransferase	59088.5	74488.4	66317.3	64113.8	68868.6	59807.6	62331.1	61478.8
P07814	P07814	SYEP_HUMAN	EPRS1	Bifunctional glutamate/proline--tRNA ligase	11748.4	10542.3	11431.3	11446.3	11149.4	10993.6	11609.1	12193.9
P07858	P07858	CATB_HUMAN	CTSB	Cathepsin B	1690.26	2106.47	1678.62	1729.75	1860.32	1813.98	1909.71	2092.37
P07900;P07900-2	P07900;P07900-2	HS90A_HUMAN	HSP90AA1	Heat shock protein HSP 90-alpha	286296	267600	291553	269384	238480	249661	265100	280067
P07910;P07910-2;P07910-4	O60812;P07910;B2RXH8;B7ZW38;P07910-2;P07910-3;P07910-4;P0DMR1	HNRPC_HUMAN	HNRNPC	Heterogeneous nuclear ribonucleoproteins C1/C2	8365.68	8833.55	9157.48	8930.4	10135.4	6794.96	9168.71	6625.25
P07947	P06241;P06241-3;P07947;P12931;P06241-2;P12931-2;P12931-3	YES_HUMAN	YES1	Tyrosine-protein kinase Yes	6162.15	6617.64	5740.29	6111.5	6886.02	6604.97	7546.67	6672.02
P07954;P07954-2	P07954;P07954-2	FUMH_HUMAN	FH	Fumarate hydratase, mitochondrial	5901.21	4778.46	7096.05	5455.34	4309.83	4099.5	5935.47	4803.08
P07996;P07996-2	P07996;P07996-2	TSP1_HUMAN	THBS1	Thrombospondin-1	1102.84	1187.6	1061.73	1164.87	1015.83	1010.37	880.397	1045.81
P08069	P08069	IGF1R_HUMAN	IGF1R	Insulin-like growth factor 1 receptor				847.089	707.133
P08133;P08133-2	P08133;P08133-2	ANXA6_HUMAN	ANXA6	Annexin A6	9475.1	7052.61	8230.84	7083.38	8816.12	6066.3	10058.8	7883.51
P08134	P08134;P61586;P62745	RHOC_HUMAN	RHOC	Rho-related GTP-binding protein RhoC	21451	25665.9	22079.7	26714.6	24360.8	26548.2	23467.7	27728.7
P08195;P08195-2;P08195-3;P08195-4;P08195-5	P08195;P08195-4;P08195-2;P08195-3;P08195-5	4F2_HUMAN	SLC3A2	4F2 cell-surface antigen heavy chain	25363.1	28876.6	24301.9	29637.6	22223.7	25320	25751.9	30396.5
P08237-3	P08237;P08237-2;P08237-3	PFKAM_HUMAN	PFKM	Isoform 3 of ATP-dependent 6-phosphofructokinase, muscle type	7273.15	8263.84	6735.13	8141.89	8076.38	7479.23	7428.57	8465.15
P08238	P08238	HS90B_HUMAN	HSP90AB1	Heat shock protein HSP 90-beta	113935	112724	125006	118381	115419	112511	119308	109253
P08240;P08240-2	P08240;P08240-2	SRPRA_HUMAN	SRPRA	Signal recognition particle receptor subunit alpha	1138.08	993.306	1689.95	1096.24	1562.79	1583.18	1370.35	2030.11
P08243;P08243-2	P08243;P08243-2;P08243-3	ASNS_HUMAN	ASNS	Asparagine synthetase [glutamine-hydrolyzing]	10310.1	11196.4	10862.6	10751.3	12426.9	12425.2	11796.6	12101.6
P08397;P08397-2	P08397;P08397-2;P08397-3;P08397-4	HEM3_HUMAN	HMBS	Porphobilinogen deaminase	1513.69	1917.85	1823.5	1820.96	2010.06	2340.82	2381.87	2629.36
P08559;P08559-2;P08559-3;P08559-4	P08559;P08559-2;P08559-3;P08559-4	ODPA_HUMAN	PDHA1	Pyruvate dehydrogenase E1 component subunit alpha, somatic form, mitochondrial	7579.96	8505.47	9199.9	8104.95	7065.74	8618.17	8366.28	9045.19
P08708	P08708	RS17_HUMAN	RPS17	Small ribosomal subunit protein eS17	6634.41	9007.51	9080.62	7461.07	8100.93	6402.85	7869.81	3323.43
P08727	P02533;P08727;P08779;P19012;Q04695;P19012-2	K1C19_HUMAN	KRT19	Keratin, type I cytoskeletal 19	220156	229678	229953	227567	195619	197171	196137	204874
P08754	P04899;P08754;P09471;P63096;P04899-2;P04899-3;P04899-4;P04899-5;P04899-6;P09471-2;P63096-2	GNAI3_HUMAN	GNAI3	Guanine nucleotide-binding protein G(i) subunit alpha-3	11244.7	9248.48	10254.5	9153.08	9749.71	11109	10374.2	9177.76
P08758	P08758	ANXA5_HUMAN	ANXA5	Annexin A5	17251.8	10247.5	12992.9	11673.4	11533.1	7635.54	12321.6	9836.97
P08865	P08865;A0A8I5KQE6	RSSA_HUMAN	RPSA	Small ribosomal subunit protein uS2	43049.1	38490.3	50408.1	35493.5	35741.8	31653.1	42078.7	31793.1
P09001	P09001	RM03_HUMAN	MRPL3	Large ribosomal subunit protein uL3m	1976.12	2379.34	2174.66	2545.43	2029.07	3315.27	3438.91	2896.97
P09110	P09110;P09110-2	THIK_HUMAN	ACAA1	3-ketoacyl-CoA thiolase, peroxisomal	824.18	727.539	824.161	750.552	1272.16	706.907	1235.16	705.008
P09382	P09382	LEG1_HUMAN	LGALS1	Galectin-1	3996.51	3171.59	2599.65	3958.74	3349.43	2256.91	2742.54	4071.65
P09417;P09417-2	P09417;P09417-2	DHPR_HUMAN	QDPR	Dihydropteridine reductase	2775.21	2571.4	2307.63	1698.96	2045.1	2172.2	1520.6	2290.23
P09429	P09429;P26583;B2RPK0	HMGB1_HUMAN	HMGB1	High mobility group protein B1	1149.39	3676.31	1158.84	2846.1	1427.7	1179.08	882.583	1477.41
P09467	O00757;P09467	F16P1_HUMAN	FBP1	Fructose-1,6-bisphosphatase 1	17243	23920.6	15530.5	21641	16734.2	17997.2	15536	18595.7
P09525;P09525-3	P09525;P09525-2;P09525-3	ANXA4_HUMAN	ANXA4	Annexin A4	4663.41	4677.38	5009.73	4129.53	4684.98	4131.29	4822.63	4255.77
P09543;P09543-2	P09543;P09543-2	CN37_HUMAN	CNP	2',3'-cyclic-nucleotide 3'-phosphodiesterase	1282.72	842.245	616.843	665.222		1148.45	829.578	851.512
P09622	P09622;P09622-2;P09622-3	DLDH_HUMAN	DLD	Dihydrolipoyl dehydrogenase, mitochondrial	5177.48	7456.89	5279.57	6142	5990.26	5735.1	5404.31	5469.67
P09651;P09651-2;P09651-3	P09651;P09651-2;P09651-3	ROA1_HUMAN	HNRNPA1	Heterogeneous nuclear ribonucleoprotein A1	3152.48	4032.92	3799.95	3925.73	3298.15	3086.76	3972.85	3337.49
P09661	P09661	RU2A_HUMAN	SNRPA1	U2 small nuclear ribonucleoprotein A'	4420.11	3963.84	4905.06	4689.42	3967.81	4436.6	4109.96	4392.57
P09758	P09758	TACD2_HUMAN	TACSTD2	Tumor-associated calcium signal transducer 2	1840.87	2267.97	2043.08	1821.42	2001.87	1564.62	1712.81	1853.81
P09874	P09874	PARP1_HUMAN	PARP1	Poly [ADP-ribose] polymerase 1	5362.05	5350.96	5797.15	5651.7	6057.11	5855.31	5994.09	5822.3
P09884	P09884	DPOLA_HUMAN	POLA1	DNA polymerase alpha catalytic subunit	584.51	546.638	590.95	815.047	470.301	714.935	751.768	669.735
P09960	P09960;P09960-4	LKHA4_HUMAN	LTA4H	Leukotriene A-4 hydrolase	11278.3	11417.6	12396.4	11278.9	10988.9	11504.1	12107.6	12002.6
P09972	P09972	ALDOC_HUMAN	ALDOC	Fructose-bisphosphate aldolase C	2380.08	2362.59	2027.05	2229.91	1620.6	2575.67	1853.08	2510.44
P0C0L4;P0C0L4-2	P0C0L4;P0C0L5;P0C0L4-2	CO4A_HUMAN	C4A	Complement C4-A	7304.45	7801.71	7625.05	7905.72	7979.28	7061.99	6060.62	7029.27
P0C0S8;P20671;Q96KK5;Q99878;Q9BTM1	P04908;P0C0S8;P20671;Q16777;Q6FI13;Q7L7L0;Q93077;Q96KK5;Q99878;Q9BTM1	H2A1D_HUMAN;H2A1H_HUMAN;H2A1J_HUMAN;H2A1_HUMAN;H2AJ_HUMAN	H2AC11;H2AC12;H2AC14;H2AC7;H2AJ	Histone H2A type 1	280.908	347.333	217.485	372.209	252.494
P0DME0;Q01105;Q01105-2;Q01105-3;Q01105-4	P0DME0;Q01105;Q01105-2;Q01105-3;Q01105-4	SETLP_HUMAN;SET_HUMAN	SET;SETSIP	Protein SETSIP	271.379	903.292	158.581	1290.73	235.003			127.587
P0DMV8;P0DMV9	P0DMV8;P0DMV9;P34931;P0DMV8-2	HS71A_HUMAN;HS71B_HUMAN	HSPA1A;HSPA1B	Heat shock 70 kDa protein 1A	80017.4	80394.5	79810.8	82133.2	72783.4	72801.5	77200.8	79393.2
P0DOX5	P0DOX5	IGG1_HUMAN		Immunoglobulin gamma-1 heavy chain	5614.3	9258.66	7445.48	8558.42	8409.43	8777.28	6372.51	7671.26
P0DOX7	P0DOX7	IGK_HUMAN		Immunoglobulin kappa light chain	11799.1	16268	9384.72	14080.3	12144.6	10647.2	10972.2	11565.6
P0DP01	P01742;P01743;A0A0B4J2H0;A0A0C4DH29;P0DP01	HV108_HUMAN	IGHV1-8	Immunoglobulin heavy variable 1-8	1823.14	2721.74	1707.32	2488.68	2247.53	2045.7	2610.79	2112.48
P0DP23;P0DP24;P0DP25	P0DP23;P0DP24;P0DP25	CALM1_HUMAN;CALM2_HUMAN;CALM3_HUMAN	CALM1;CALM2;CALM3	Calmodulin-1		3422.49	984.498	961.554		1022.35	982.795	688.198
P0DPB6	P0DPB6	RPAC2_HUMAN	POLR1D	DNA-directed RNA polymerases I and III subunit RPAC2	2724.69	2930.98	3206.07	2936.3	2574.82	2705.4	3549.77	2270.89
P0DPH7;P0DPH7-2;P0DPH8;Q6PEY2;Q71U36;Q71U36-2	P0DPH7;P0DPH8;Q6PEY2;Q71U36;P0DPH7-2;Q71U36-2	TBA1A_HUMAN;TBA3C_HUMAN;TBA3D_HUMAN;TBA3E_HUMAN	TUBA1A;TUBA3C;TUBA3D;TUBA3E	Tubulin alpha-3C chain	2498.97	1725.34	1720.61	1332.78	1265.02	1226.83	1744.16	1114.89
P0DTE2	P0DTE2	HV511_HUMAN	IGHV8-51-1	Probable non-functional immunoglobulin heavy variable 8-51-1		555.577		853.609		820.257	798.338	850.257
P0DTE7;P0DTE8;P0DUB6	P04746;P0DTE7;P0DTE8;P0DUB6;P19961;P19961-2;P04746-2	AMY1A_HUMAN;AMY1B_HUMAN;AMY1C_HUMAN	AMY1A;AMY1B;AMY1C	Alpha-amylase 1B		4679.76
P10155;P10155-3;P10155-4;P10155-5	P10155;P10155-3;P10155-4;P10155-5	RO60_HUMAN	RO60	RNA-binding protein RO60	3160.45	2904.82	3424.11	3407.76	2879.8	3016.55	3273.44	3347.47
P10253	P10253	LYAG_HUMAN	GAA	Lysosomal alpha-glucosidase	643.101	1699.81	624.838	940.716	636.013		505.135
P10301	P10301	RRAS_HUMAN	RRAS	Ras-related protein R-Ras	1140.67	1755.34	2427.4	1501.64	1847.7	2183.11	2405.1	1955.16
P10321;P10321-2	P10321;P10321-2	HLAC_HUMAN	HLA-C	HLA class I histocompatibility antigen, C alpha chain	1548.18	1715.36	1853.77	1659.22	2326.92	1574.37	1719.76	1422.71
P10398	P04049;P10398;P15056;P04049-2	ARAF_HUMAN	ARAF	Serine/threonine-protein kinase A-Raf	4423.88	4742.57	4214.37	4903.78	5646.67	4485.51	3665.85	3929.04
P10412;P16402;P16403	P10412;P16402;P16403	H12_HUMAN;H13_HUMAN;H14_HUMAN	H1-2;H1-3;H1-4	Histone H1.4	2662.48	1825.43	4281.55	3212.01	3072.82	3496.07	2336.31	2631.1
P10515	P10515	ODP2_HUMAN	DLAT	Dihydrolipoyllysine-residue acetyltransferase component of pyruvate dehydrogenase complex, mitochondrial	2092	1668.25	1874.04	1756.92	2119.74	1803.15	1947.07	1743.47
P10586;P10586-2	P10586;P10586-2	PTPRF_HUMAN	PTPRF	Receptor-type tyrosine-protein phosphatase F	5151.9	5726.29	5231.62	5434.09	5680.08	5825.08	5211.52	5834.91
P10599;P10599-2	P10599;P10599-2	THIO_HUMAN	TXN	Thioredoxin	929.379	2274.96	690.785	1503.55	969.837	822.979	464.993	855.515
P10619;P10619-2	P10619;P10619-2	PPGB_HUMAN	CTSA	Lysosomal protective protein	820.813	1579.19	1338.79	1495.58	1430.82	1121.88	1489.98	1380.08
P10620	P10620;P10620-2	MGST1_HUMAN	MGST1	Microsomal glutathione S-transferase 1	6413.04	6942.47	7673.11	8152.31	9498.01	8338.66	7715.82	9838.81
P10644	P10644;P10644-2	KAP0_HUMAN	PRKAR1A	cAMP-dependent protein kinase type I-alpha regulatory subunit	1091.59	1432.7	1102.51	1533.58	586.55	529.627	1463.45	474.597
P10809	P10809	CH60_HUMAN	HSPD1	60 kDa heat shock protein, mitochondrial	28457.4	25709.4	25164.4	24926.9	25157.6	16103.3	27882.9	20348.4
P11021	P11021	BIP_HUMAN	HSPA5	Endoplasmic reticulum chaperone BiP	23975.2	25397.7	22784.9	24293.5	21018.3	19266.6	24033.2	20988.1
P11117	P11117	PPAL_HUMAN	ACP2	Lysosomal acid phosphatase	2156.45	1354.38	1629.87	1202.96	709.016	1598.21	1459.52	2009.62
P11142	P11142;P54652;P11142-2	HSP7C_HUMAN	HSPA8	Heat shock cognate 71 kDa protein	265835	248334	274056	264703	251801	234720	265144	262413
P11166	P11166	GTR1_HUMAN	SLC2A1	Solute carrier family 2, facilitated glucose transporter member 1	8497.22	15522.7	15208.6	15257.5	12578.3	19044.9	15334.5	13318.4
P11171;P11171-2;P11171-3;P11171-4;P11171-5;P11171-6	P11171;P11171-2;P11171-3;P11171-4;P11171-5;P11171-6	EPB41_HUMAN	EPB41	Protein 4.1	448.153	314.692	505.488	628.715			452.226	465.384
P11172	P11172	UMPS_HUMAN	UMPS	Uridine 5'-monophosphate synthase	3631.94	5067.78	5547.22	4545.39	3945.62	3524.71	5189.37	4913.21
P11177;P11177-2	P11177;P11177-2;P11177-3	ODPB_HUMAN	PDHB	Pyruvate dehydrogenase E1 component subunit beta, mitochondrial	5606.87	5785.46	4688.57	5558.49	5761.12	5572.86	4875.95	5938.5
P11182	P11182	ODB2_HUMAN	DBT	Lipoamide acyltransferase component of branched-chain alpha-keto acid dehydrogenase complex, mitochondrial								236.034
P11216	P11216;P11217	PYGB_HUMAN	PYGB	Glycogen phosphorylase, brain form	11527.8	12734.8	15026	13862	10878	12486.5	12867.1	11823.5
P11217	P11217;P11217-2	PYGM_HUMAN	PYGM	Glycogen phosphorylase, muscle form	598.378	470.209	344.72	857.229		768.333	1056.37	536.651
P11233;P11234;P11234-2;P11234-3	P11233;P11234;P11234-2;P11234-3	RALA_HUMAN;RALB_HUMAN	RALA;RALB	Ras-related protein Ral-A		595.92	576.281	577.001	267.991	433.386		894.121
P11279	P11279	LAMP1_HUMAN	LAMP1	Lysosome-associated membrane glycoprotein 1	4952.48	5383.29	4759.96	5278.3	4212.8	5571.56	4526.51	3560.08
P11310;P11310-2	P11310;P11310-2	ACADM_HUMAN	ACADM	Medium-chain specific acyl-CoA dehydrogenase, mitochondrial	3578.08	4286.99	3513.53	3447.97	4383.06	3903.33	3273.69	3592.07
P11388;P11388-2;P11388-3;P11388-4	P11388;P11388-2;P11388-3;P11388-4	TOP2A_HUMAN	TOP2A	DNA topoisomerase 2-alpha	3226.87	3994.75	4514.05	3942.34	4076.58	3481.77	4437.32	3478.16
P11413;P11413-2;P11413-3	P11413;P11413-2;P11413-3	G6PD_HUMAN	G6PD	Glucose-6-phosphate 1-dehydrogenase	79301.4	91393.9	88049.5	86763.7	84913.5	88881.3	87404.5	90713.9
P11498	P11498	PYC_HUMAN	PC	Pyruvate carboxylase, mitochondrial	3437.49	2903.04	3486.52	3382.28	3099.12	2717.8	2986.93	2616.15
P11586	P11586	C1TC_HUMAN	MTHFD1	C-1-tetrahydrofolate synthase, cytoplasmic	34002	28320.2	31564.3	28633.9	27476	27378.8	28941.7	29440.5
P11717	P11717	MPRI_HUMAN	IGF2R	Cation-independent mannose-6-phosphate receptor	945.558	1036.77	1092.41	1515.42	1207.56	966.603	1007.03	1409.6
P11766	P11766	ADHX_HUMAN	ADH5	Alcohol dehydrogenase class-3	16354.9	17916.8	11106.7	15123.2	11737	14214.1	11400.4	16511.6
P11802	P11802	CDK4_HUMAN	CDK4	Cyclin-dependent kinase 4	3251.15	3204.56	3652.9	3364.21	3681.87	3239.72	3186.68	3798.16
P11908;P11908-2	P11908;P21108;P60891;P11908-2;P60891-2	PRPS2_HUMAN	PRPS2	Ribose-phosphate pyrophosphokinase 2	11120.5	8619.01	8169.2	9987.48	8803.42	7306.98	9489.58	8947.46
P11940;P11940-2	P11940;Q4VXU2;P11940-2;Q4VXU2-2	PABP1_HUMAN	PABPC1	Polyadenylate-binding protein 1	34317.7	31232.7	35109	34431	32600.1	31132.8	34755.2	31995.8
P12004	P12004	PCNA_HUMAN	PCNA	Proliferating cell nuclear antigen	11220.9	13877.7	11283.9	12908.2	12837.9	13530.4	11683	11582.9
P12035	P12035	K2C3_HUMAN	KRT3	Keratin, type II cytoskeletal 3		12565.6	1701.38					3957.19
P12081;P12081-4	P12081;P49590;P12081-2;P12081-3;P12081-4;P49590-2	HARS1_HUMAN	HARS1	Histidine--tRNA ligase, cytoplasmic	10260.7	7490.73	8863.46	7950.2	8505.22	7494.07	8570.33	8285.83
P12235	P12235	ADT1_HUMAN	SLC25A4	ADP/ATP translocase 1	11435.6	15958.9	13719.7	12467.8	15846.5	14267.3	13449.1	11341
P12236	P12236	ADT3_HUMAN	SLC25A6	ADP/ATP translocase 3	3030.94	6855.6	5764.57	5105	5256.22	5479.87	5391.7	6116.51
P12268	P12268	IMDH2_HUMAN	IMPDH2	Inosine-5'-monophosphate dehydrogenase 2	8757.36	7593.43	7770.75	8126.97	7621.24	7044.39	7966.1	7975.03
P12273	P12273	PIP_HUMAN	PIP	Prolactin-inducible protein		1682.48
P12277	P12277	KCRB_HUMAN	CKB	Creatine kinase B-type	2126.84	2113.07	1236.76	887.577	661.803	755.932	542.95	378.899
P12429	P12429	ANXA3_HUMAN	ANXA3	Annexin A3	1003.02	495.586	1174.55	518.6	1209.36	890.366	1222.76	990.205
P12532	P12532;P17540;P12532-2	KCRU_HUMAN	CKMT1A	Creatine kinase U-type, mitochondrial	1072.66	1390.84	731.119	1657.95	508.884	1063.26	1105.16	919.296
P12694;P12694-2	P12694;P12694-2	ODBA_HUMAN	BCKDHA	2-oxoisovalerate dehydrogenase subunit alpha, mitochondrial	831.032	1460.76	1660.23	1046.75	1790.18	1235.13	1070.41	1359.72
P12814;P12814-2;P12814-3;P12814-4	P12814;P12814-2;P12814-3;P12814-4	ACTN1_HUMAN	ACTN1	Alpha-actinin-1	2125.5	2143.7	2208.09	2386.41	2308.67	1708.03	2302.58	1649.54
P12830;P12830-2	P12830;P12830-2	CADH1_HUMAN	CDH1	Cadherin-1	1060.83	1827.16		916.97	609.383
P12931;P12931-2;P12931-3	P12931;P12931-2;P12931-3	SRC_HUMAN	SRC	Proto-oncogene tyrosine-protein kinase Src				1108.36	879.62	927.245	730.641	897.051
P12956	P12956;P12956-2	XRCC6_HUMAN	XRCC6	X-ray repair cross-complementing protein 6	29608.6	35075.4	34473.8	34772.2	30449	34969.2	31422.5	33943.1
P13010	P13010	XRCC5_HUMAN	XRCC5	X-ray repair cross-complementing protein 5	46352.5	46489.2	54516	49404.6	52793	52013	50655	47208.6
P13051	P13051	UNG_HUMAN	UNG	Uracil-DNA glycosylase	3030.91	2857.31	2976.7	3070.57	3152.46	3292.14	3319.58	3144.74
P13284	P13284	GILT_HUMAN	IFI30	Gamma-interferon-inducible lysosomal thiol reductase	709.734	1150.22	646.376	773.728	628.996		557.948	692.481
P13489	P13489	RINI_HUMAN	RNH1	Ribonuclease inhibitor	17584.1	18582.3	18047	17380.1	19589.7	17300.5	18084.5	19041.5
P13639	P13639	EF2_HUMAN	EEF2	Elongation factor 2	123626	134789	133281	130293	133631	127188	132473	125839
P13645	P13645	K1C10_HUMAN	KRT10	Keratin, type I cytoskeletal 10	66980.7	141546	8430.51	31630.2	11146.1	49457.1	14707.7	26399.6
P13646;P13646-2;P13646-3;P19012	P13646;P19012;P13646-2;P13646-3	K1C13_HUMAN;K1C15_HUMAN	KRT13;KRT15	Keratin, type I cytoskeletal 13	30786.5	18320.5	23838	15624.8	20408.8	18218.9	22999.8	9251.06
P13647	P13647	K2C5_HUMAN	KRT5	Keratin, type II cytoskeletal 5	9973.19	24366	2952.98	4456.14	3295.61	12440.4	4166.6	6541.93
P13667	P13667	PDIA4_HUMAN	PDIA4	Protein disulfide-isomerase A4	16660.6	16859.5	15209.9	16259.9	14691.4	13931.8	15062.3	15449
P13674;P13674-2;P13674-3	P13674;P13674-2;P13674-3	P4HA1_HUMAN	P4HA1	Prolyl 4-hydroxylase subunit alpha-1	3557.72	3910.83	4020.18	3405.43	4084.7	3962.72	3754.86	3689.26
P13693	P13693;P13693-2;Q56UQ5	TCTP_HUMAN	TPT1	Translationally-controlled tumor protein	5807.89	5950.27	5199.32	4572.47	4710.85	4582.12	5492.33	5704.03
P13797-2	P13796;P13797;P13797-2;P13797-3	PLST_HUMAN	PLS3	Isoform 2 of Plastin-3	3042.96	3383.07	2140.4	2914.43	3243.71	2257.53	3179.69	2288.03
P13798	P13798	ACPH_HUMAN	APEH	Acylamino-acid-releasing enzyme	2243.34	2528.19	2390.49	2456.43	2243.45	3134.34	2499.78	3728.33
P13804	P13804;P13804-2	ETFA_HUMAN	ETFA	Electron transfer flavoprotein subunit alpha, mitochondrial	10129.3	9559.62	9014.35	9285.98	7954.07	8986.52	8575.21	10347.8
P13807;P13807-2	P13807;P13807-2	GYS1_HUMAN	GYS1	Glycogen [starch] synthase, muscle	2467.21	2738.3	2895.67	2483.25	2801.01	2225.6	1926.66	2204.76
P14174	P14174	MIF_HUMAN	MIF	Macrophage migration inhibitory factor	28682.1	42093.9	27328	41467.5	37510.5	43851	36510.3	34643.8
P14314;P14314-2	P14314;P14314-2	GLU2B_HUMAN	PRKCSH	Glucosidase 2 subunit beta	7382.82	8793.52	7032.42	8184.45	6110.78	7177.93	6600.69	8095.96
P14324;P14324-2	P14324;P14324-2	FPPS_HUMAN	FDPS	Farnesyl pyrophosphate synthase	3888.02	3912.73	4137.71	3700.12	4331.1	3728.16	5081.3	3761.57
P14406	P14406	CX7A2_HUMAN	COX7A2	Cytochrome c oxidase subunit 7A2, mitochondrial	2927.85	5923.3	4949.01	5116.03	3495.54	2612.75	3975.68	4177.88
P14550	P14550	AK1A1_HUMAN	AKR1A1	Aldo-keto reductase family 1 member A1	1033.86	825.683	1461.52	797.42	950.751	1140.82	1264.23	923.544
P14618	P14618;P14618-2;P14618-3	KPYM_HUMAN	PKM	Pyruvate kinase PKM	156371	157892	143947	147700	150820	165965	152725	158216
P14618-2	P14618-2	KPYM_HUMAN	PKM	Isoform M1 of Pyruvate kinase PKM	5210.24	6782.78	5739.68	5889.64	5574.16	5633.8	4866.6	6408.44
P14625	P14625	ENPL_HUMAN	HSP90B1	Endoplasmin	55646.4	44808.9	49936.6	47124.9	42172.4	43416.3	48627.1	47253.6
P14678;P14678-2;P14678-3;P63162;P63162-2	P14678;P14678-2;P63162;P14678-3;P63162-2	RSMB_HUMAN;RSMN_HUMAN	SNRPB;SNRPN	Small nuclear ribonucleoprotein-associated proteins B and B'	1865.42	2515.06	2930.24	2627.3	2303.32	3171.04	2769.43	3440.41
P14735	P14735	IDE_HUMAN	IDE	Insulin-degrading enzyme	6517.73	7440.86	7708.42	7317.29	6746.71	8170.42	7365.29	7479.71
P14866;P14866-2	P14866;P14866-2	HNRPL_HUMAN	HNRNPL	Heterogeneous nuclear ribonucleoprotein L	9373.94	13274.3	10089.4	12414.8	10676.1	12475.8	11823.2	12627.7
P14868	P14868	SYDC_HUMAN	DARS1	Aspartate--tRNA ligase, cytoplasmic	15223.1	17303.4	15075.7	16988.7	17300.5	17796.5	16511.4	17057.8
P14923	P14923	PLAK_HUMAN	JUP	Junction plakoglobin	3317.19	4063.99	2815.99	3076.82	2819.24	2957.16	2700.35	3059.06
P15170-2;P15170-3	P15170;P15170-2;P15170-3	ERF3A_HUMAN	GSPT1	Isoform 2 of Eukaryotic peptide chain release factor GTP-binding subunit ERF3A	1360.62	2055.61	1643.28	2105.97	1449.1	2110.41	2142.28	2521.17
P15311	P15311	EZRI_HUMAN	EZR	Ezrin	18498.7	17526.1	19632.1	20509.5	18552.2	15577.4	18537.5	17218.9
P15374	P15374	UCHL3_HUMAN	UCHL3	Ubiquitin carboxyl-terminal hydrolase isozyme L3	2652	9748.05	1533.92	13204.6	89455	101988	79800.9	90294.4
P15559;P15559-2;P15559-3	P15559;P15559-2;P15559-3	NQO1_HUMAN	NQO1	NAD(P)H dehydrogenase [quinone] 1	20501	29917.9	23505.1	30595.9	25851.8	32812.4	26954.1	39184.4
P15586;P15586-2	P15586;P15586-2	GNS_HUMAN	GNS	N-acetylglucosamine-6-sulfatase	1221.64	1575.16	1707.63	1374.23	1050.77	1048.21	1124.77	932.203
P15880	P15880	RS2_HUMAN	RPS2	Small ribosomal subunit protein uS5	5813.28	7796.05	11453.5	8567.52	6740.63	10196.2	9345.2	8542
P15924	P15924;P15924-2;P15924-3	DESP_HUMAN	DSP	Desmoplakin	6205.06	7080.71	5648.52	5378.68	4608.23	5290.13	5252.6	4928.2
P15927;P15927-2;P15927-3	P15927;P15927-2;P15927-3	RFA2_HUMAN	RPA2	Replication protein A 32 kDa subunit	1631.39	2067.12	2013.18	2195.08	1531.6	1778.5	1596.94	2330.61
P16152	P16152	CBR1_HUMAN	CBR1	Carbonyl reductase [NADPH] 1	6452.17	7077.38	7240.37	6579.73	5271.33	6449.61	5697.69	6292.36
P16278;P16278-3	P16278;P16278-2;P16278-3	BGAL_HUMAN	GLB1	Beta-galactosidase	2800.58	4381.31	3260.67	4003.89	3570.62	3897.38	2985.13	4052.15
P16401	P16401	H15_HUMAN	H1-5	Histone H1.5	3298.87	2964.93	8500.57	5482.25	8409.31	8240.84	6605.74	5652.33
P16422	P16422	EPCAM_HUMAN	EPCAM	Epithelial cell adhesion molecule	2615.52	2310.39	2277.35	1972.53	2803.36	2538.97	2941.72	1878.11
P16435	P16435	NCPR_HUMAN	POR	NADPH--cytochrome P450 reductase	6004.76	6897.1	5269.42	5377.39	5299.67	6349.8	6086.63	7169.59
P16519;P16519-2;P16519-3	P16519;P16519-2;P16519-3	NEC2_HUMAN	PCSK2	Neuroendocrine convertase 2			256.286	683.207	550.565	610.243	894.969	763.792
P16615	P16615;P16615-2;P16615-3;P16615-4;P16615-5	AT2A2_HUMAN	ATP2A2	Sarcoplasmic/endoplasmic reticulum calcium ATPase 2	10985.2	11925.1	11055.6	11707.7	13004.8	12727.4	12833.8	11947
P16885	P16885	PLCG2_HUMAN	PLCG2	1-phosphatidylinositol 4,5-bisphosphate phosphodiesterase gamma-2						363.723		656.987
P16930	P16930;P16930-2	FAAA_HUMAN	FAH	Fumarylacetoacetase	3853.49	5520.57	4083.46	5671.3	3745.46	3848.78	4009.02	4892.94
P16989;P16989-2;P16989-3	P16989;P16989-2;P16989-3	YBOX3_HUMAN	YBX3	Y-box-binding protein 3	574.357	562.141	776.364	569.22	329.831	783.41		554.873
P17066	P17066;P48741	HSP76_HUMAN	HSPA6	Heat shock 70 kDa protein 6					32877.5			33206.2
P17174	P17174;P17174-2	AATC_HUMAN	GOT1	Aspartate aminotransferase, cytoplasmic	6923.26	6270.93	6314.02	7720.93	6628.44	7628.68	7596.45	6958.19
P17301	P17301	ITA2_HUMAN	ITGA2	Integrin alpha-2	3217.49	3493.99	3348.83	3359.45	3470.14	4204.75	3320.92	3818.29
P17612	P17612;P22694;P22694-10;P22694-2;P22694-3;P22694-4;P22694-5;P22694-6;P22694-7;P22694-9;P17612-2	KAPCA_HUMAN	PRKACA	cAMP-dependent protein kinase catalytic subunit alpha	2600.95	2864.48	2584.68	2825.29	2466.68	2223.29	2724.83	2927.6
P17676-3	P17676-3	CEBPB_HUMAN	CEBPB	Isoform 3 of CCAAT/enhancer-binding protein beta				457.724
P17706;P17706-2;P17706-3;P17706-4	P17706;P17706-2;P17706-3;P17706-4	PTN2_HUMAN	PTPN2	Tyrosine-protein phosphatase non-receptor type 2	4778.9	5716.22	6391.86	7344.04	8485.5	7563.52	6848.62	7796.35
P17812	P17812;Q9NRF8	PYRG1_HUMAN	CTPS1	CTP synthase 1	6682.41	5842.98	6906.33	6430.29	5808.93	5945.75	6795.76	5657.64
P17844;P17844-2	P17844;P17844-2	DDX5_HUMAN	DDX5	Probable ATP-dependent RNA helicase DDX5	40070.9	34781.1	40595.4	34625.4	36458.8	36567.1	39508.6	33033.6
P17858-2	P08237;P17858;P08237-3;P17858-2	PFKAL_HUMAN	PFKL	Isoform 2 of ATP-dependent 6-phosphofructokinase, liver type	11732	13382.1	13013.3	13169.5	11033.6	10455.9	11306.5	10720.7
P17980	P17980	PRS6A_HUMAN	PSMC3	26S proteasome regulatory subunit 6A	10469	9411.78	11199.3	8252.89	8604.06	7568.33	8368.53	8496.09
P17987	P17987	TCPA_HUMAN	TCP1	T-complex protein 1 subunit alpha	38744.5	42383	38836.2	39149.3	39413.8	39697.5	37886.2	39879.8
P18031	P18031	PTN1_HUMAN	PTPN1	Tyrosine-protein phosphatase non-receptor type 1	2258.79	2189.92	2259.7	2251.06	2009.76	1963.56	2314.12	2070.63
P18074	P18074	ERCC2_HUMAN	ERCC2	General transcription and DNA repair factor IIH helicase subunit XPD	1048.44	490.841	526.214	804.347	1707.71	645.841	905.965	602.96
P18077	P18077	RL35A_HUMAN	RPL35A	Large ribosomal subunit protein eL33	78953.3	89104.9	95752.4	89515.5	96144.1	109651	88448.3	82250.3
P18085	P18085	ARF4_HUMAN	ARF4	ADP-ribosylation factor 4	13659.9	13931.6	15459.2	17524.3	22658.6	21764.1	18551	18057.5
P18124	P18124	RL7_HUMAN	RPL7	Large ribosomal subunit protein uL30	42851.6	40164.4	50412.8	43828.2	46335.8	44885.1	48036.1	35644.7
P18206;P18206-2	P18206;P18206-2	VINC_HUMAN	VCL	Vinculin	1660.35	1686.03	1750.51	1258.85	1206.76	1351.11	1192.33	1061.44
P18440	P18440	ARY1_HUMAN	NAT1	Arylamine N-acetyltransferase 1	2560.87	3184.18	2760.25	3742.68	1894.94	2868.49	3370.49	2301.22
P18583;P18583-10;P18583-2;P18583-3;P18583-4;P18583-5;P18583-6;P18583-7;P18583-8;P18583-9	P18583;P18583-10;P18583-2;P18583-3;P18583-4;P18583-5;P18583-6;P18583-7;P18583-8;P18583-9	SON_HUMAN	SON	Protein SON	1535.46	1874.51	1991.97	2374	2016.21	2189.77	1788.04	1660.51
P18621;P18621-3	P18621;P18621-3	RL17_HUMAN	RPL17	Large ribosomal subunit protein uL22	27036.5	28991.1	36229.5	35179.2	26455.3	33350.2	30175.8	28967.1
P18669	P18669	PGAM1_HUMAN	PGAM1	Phosphoglycerate mutase 1	32633.5	28122.6	21116.3	25608.3	21756.3	21124.3	24032	26728.9
P18754;P18754-2	P18754;P18754-2	RCC1_HUMAN	RCC1	Regulator of chromosome condensation	4257.43	7395.48	6778.8	6923.8	6387.59	6881.27	6087.73	6875.78
P18827	P18827	SDC1_HUMAN	SDC1	Syndecan-1	1714.82	3175.31	2042.05	2611.24	1758.49	1366	956.573	2413.75
P18858;P18858-3	P18858;P18858-2;P18858-3	DNLI1_HUMAN	LIG1	DNA ligase 1	2822.76	2634.22	3365.37	3636.14	2570.91	2609.05	3447	2820.53
P18887	P18887	XRCC1_HUMAN	XRCC1	DNA repair protein XRCC1	2311.45	1643.3	1895.07	1337.84	1986.9	2070.56	1607.55	1481.2
P19174;P19174-2	P19174;P19174-2	PLCG1_HUMAN	PLCG1	1-phosphatidylinositol 4,5-bisphosphate phosphodiesterase gamma-1	1968.57	2048.94	2435.9	2399.4	2034.66	2534.5	1892.62	2213.55
P19338	P19338	NUCL_HUMAN	NCL	Nucleolin	19164.2	15299	19301.6	16426	20112.7	18462.9	20774.8	14499.6
P19367;P19367-2;P19367-3;P19367-4	P19367;P19367-2;P19367-3;P19367-4	HXK1_HUMAN	HK1	Hexokinase-1	9343.99	10842.8	8929.67	10198.1	7799.09	7880.13	8750.82	8758.39
P19387	P19387	RPB3_HUMAN	POLR2C	DNA-directed RNA polymerase II subunit RPB3	2033.02	1309.52	1626.63	1159.95	1568.72	1172.9	1017.87	1716.57
P19388	P19388	RPAB1_HUMAN	POLR2E	DNA-directed RNA polymerases I, II, and III subunit RPABC1	541.758	339.358	864.7	569.954	640.292	313.195	592.137	590.411
P19404	P19404	NDUV2_HUMAN	NDUFV2	NADH dehydrogenase [ubiquinone] flavoprotein 2, mitochondrial		663.759	1263.83	635.762	671.946	957.918	644.167	519.864
P19447	P19447	ERCC3_HUMAN	ERCC3	General transcription and DNA repair factor IIH helicase subunit XPB	236.128			284.732				186.301
P19525	P19525;P19525-2	E2AK2_HUMAN	EIF2AK2	Interferon-induced, double-stranded RNA-activated protein kinase	3443.83	3670.91	3882.37	3922.69	3640.7	4603.95	3702.49	4041.7
P19623	P19623	SPEE_HUMAN	SRM	Spermidine synthase	36515.8	39547.8	39544.6	34619.9	44195.9	42427.5	40454.6	34519.4
P19784	P19784	CSK22_HUMAN	CSNK2A2	Casein kinase II subunit alpha'	2759.08	2952.81	2301.45	3315.7	2725.11	2743.33	4157.19	2900.99
P19838;P19838-2;P19838-3	P19838;P19838-2;P19838-3	NFKB1_HUMAN	NFKB1	Nuclear factor NF-kappa-B p105 subunit							266.354
P20020;P20020-1;P20020-4;P20020-6	P20020;P23634;P23634-2;P23634-3;P23634-4;P23634-5;P23634-6;P23634-7;P23634-8;P20020-1;P20020-2;P20020-4;P20020-5;P20020-6	AT2B1_HUMAN	ATP2B1	Plasma membrane calcium-transporting ATPase 1	4200.85	4133.31	3942.77	4095.68	4337.82	4185.9	4321.22	3768.45
P20042	P20042	IF2B_HUMAN	EIF2S2	Eukaryotic translation initiation factor 2 subunit 2	13068.8	9573.54	11837.6	8501.28	11562.9	8092.26	12326.7	10431.1
P20073;P20073-2	P20073;P20073-2	ANXA7_HUMAN	ANXA7	Annexin A7	5386.02	4995.78	5251	5319.09	4251.65	4161.59	4916.72	4469.74
P20290-2	P20290;P20290-2	BTF3_HUMAN	BTF3	Isoform 2 of Transcription factor BTF3	4413.9	9196.23	4107.32	6284.63	3259.01	3642.83	7289.02	7935.63
P20336	P20336	RAB3A_HUMAN	RAB3A	Ras-related protein Rab-3A	1151.13	2112.24	1542.26	2708.47	1515.18	2371.77	1899.6	2275.58
P20338	P20338	RAB4A_HUMAN	RAB4A	Ras-related protein Rab-4A	1760.44	1977.89	1039.25	1269.32		2004.57	807.809	1429.8
P20339;P20339-2	P20339;P20339-2	RAB5A_HUMAN	RAB5A	Ras-related protein Rab-5A	6825.99	8908.23	5470.69	7251.74	7096.14	8544.47	6261.08	9158.11
P20340;P20340-2	P20340;P20340-2;P20340-3;P20340-4	RAB6A_HUMAN	RAB6A	Ras-related protein Rab-6A	21051.9	24207	21733.7	22268.3	23645.9	24817.7	24531.3	25215.8
P20585	P20585	MSH3_HUMAN	MSH3	DNA mismatch repair protein Msh3	1346.7	1737.26	1772.8	2641.45	1834.35	1633.74	2204.38	2299.94
P20618	P20618	PSB1_HUMAN	PSMB1	Proteasome subunit beta type-1	8101.97	10431.9	7012.01	9543.06	8034.66	12691.6	9821.71	12082.4
P20700	P20700	LMNB1_HUMAN	LMNB1	Lamin-B1	949.772	827.695	637.554	873.056		703.857	613.41	940.222
P20839;P20839-2;P20839-3;P20839-4;P20839-5;P20839-6;P20839-7	P20839;P20839-3;P20839-2;P20839-4;P20839-5;P20839-6;P20839-7	IMDH1_HUMAN	IMPDH1	Inosine-5'-monophosphate dehydrogenase 1	3120.78	3367.21	2058.67	3830.95	2548.65	2963.32	4148.99	3398.86
P20936;P20936-2;P20936-4	P20936;P20936-2;P20936-4	RASA1_HUMAN	RASA1	Ras GTPase-activating protein 1	1315.23	1381.17	1379.81	1279.6	1495.95	1269.81	1210.74	1312.41
P21127;P21127-10;P21127-12;P21127-2;P21127-3;P21127-4;P21127-5;P21127-6;P21127-8;P21127-9;Q9UQ88;Q9UQ88-10;Q9UQ88-2;Q9UQ88-3;Q9UQ88-4;Q9UQ88-5	P21127;Q9UQ88;P21127-10;P21127-12;P21127-2;P21127-3;P21127-4;P21127-5;P21127-6;P21127-8;P21127-9;Q9UQ88-10;Q9UQ88-2;Q9UQ88-3;Q9UQ88-4;Q9UQ88-5;Q9UQ88-9	CD11A_HUMAN;CD11B_HUMAN	CDK11A;CDK11B	Cyclin-dependent kinase 11B	249.633	181.929	437.363	356.892	788.412	620.918		184.407
P21266	P21266	GSTM3_HUMAN	GSTM3	Glutathione S-transferase Mu 3	4019.2	3814.51	3893.55	3704.11	3591.24	3457.68	3453.58	3977.76
P21281	P21281	VATB2_HUMAN	ATP6V1B2	V-type proton ATPase subunit B, brain isoform	4068.35	4659.14	4246.77	4307.05	3293.78	3765.65	3426.71	4376.28
P21283	P21283	VATC1_HUMAN	ATP6V1C1	V-type proton ATPase subunit C 1	3161.66	2240.49	2389.69	2459.84	2687.95	2398.17	2171.62	1980.49
P21291	P21291	CSRP1_HUMAN	CSRP1	Cysteine and glycine-rich protein 1	1928.17	2603.05	1673.05	3084.08	2172.89	3602.13	2616.2	4974.88
P21333;P21333-2	P21333;P21333-2	FLNA_HUMAN	FLNA	Filamin-A	8322.41	6665.9	7386.54	6841.96	6298.37	5915.9	6901.97	6362.26
P21399	P21399	ACOHC_HUMAN	ACO1	Cytoplasmic aconitate hydratase	1330.72	2265.77	977.391	861.891	2035.88	2911.39	1405.07	1299.64
P21796	P21796	VDAC1_HUMAN	VDAC1	Voltage-dependent anion-selective channel protein 1	25337.3	29968.6	24039.7	30822	28308.5	36669.9	26687.8	37434
P21926	P21926	CD9_HUMAN	CD9	CD9 antigen		1725.72		994.07
P21964;P21964-2	P21964;P21964-2	COMT_HUMAN	COMT	Catechol O-methyltransferase	3233.66	3852.19	2834.86	3500.8	2890.02	2592.94	2265.32	3478.82
P22033	P22033	MUTA_HUMAN	MMUT	Methylmalonyl-CoA mutase, mitochondrial	1524.81	1442.5	2009	2304.31	1912.48	2487.76	2196.92	2569.17
P22059	P22059	OSBP1_HUMAN	OSBP	Oxysterol-binding protein 1	2449.29	2178.75	2197.5	2300.11	2851.42	3031.61	2178.29	2290.25
P22061;P22061-2	P22061;P22061-2	PIMT_HUMAN	PCMT1	Protein-L-isoaspartate(D-aspartate) O-methyltransferase	1417.18	1748.31	1282.2	1284.9	1169.07	1010.15	1086.41	1587.65
P22087	P22087	FBRL_HUMAN	FBL	rRNA 2'-O-methyltransferase fibrillarin	3852.94	5502.45	7788.94	5422.01	6209.37	5891.65	7694.23	5790.37
P22102	P22102	PUR2_HUMAN	GART	Trifunctional purine biosynthetic protein adenosine-3	14179.1	18029.9	16471.1	14808	15875.2	15407.4	15844.5	15687.3
P22234	P22234;P22234-2	PUR6_HUMAN	PAICS	Bifunctional phosphoribosylaminoimidazole carboxylase/phosphoribosylaminoimidazole succinocarboxamide synthetase	20156	19272	16637.8	18970.7	16794.9	19977.9	18752	19138.5
P22314;P22314-2	P22314;P22314-2	UBA1_HUMAN	UBA1	Ubiquitin-like modifier-activating enzyme 1	13770.8	11222.2	13233	10596.8	11131.7	9785.58	12662.9	11666.4
P22392-2	P15531;P22392;O60361;P22392-2;P15531-2	NDKB_HUMAN	NME2	Isoform 3 of Nucleoside diphosphate kinase B	18054.4	27569.6	17714.2	21007.9	16372.9	19358.6	18627.1	25129
P22570;P22570-2;P22570-3;P22570-4;P22570-5;P22570-6;P22570-7	P22570;P22570-2;P22570-3;P22570-4;P22570-5;P22570-6;P22570-7	ADRO_HUMAN	FDXR	NADPH:adrenodoxin oxidoreductase, mitochondrial	3885.36	2998.03	3879.83	2707.07	3169.38	3100.84	2988.52	2589.29
P22626;P22626-2	P22626;P22626-2	ROA2_HUMAN	HNRNPA2B1	Heterogeneous nuclear ribonucleoproteins A2/B1	14257	12930.6	16114.1	16244.9	15651.8	14115.4	15603.1	14680.9
P22694;P22694-2;P22694-3;P22694-4;P22694-5;P22694-6;P22694-7;P22694-9	P22694;P22694-2;P22694-3;P22694-4;P22694-5;P22694-6;P22694-7;P22694-8;P22694-9	KAPCB_HUMAN	PRKACB	cAMP-dependent protein kinase catalytic subunit beta	256.041	192.306	461.673	349.354	258.474	88.3331	462.53	349.265
P22695	P22695	QCR2_HUMAN	UQCRC2	Cytochrome b-c1 complex subunit 2, mitochondrial	7047.32	9465.13	7516.34	8998.75	6361.62	6838.64	6527.12	6662.41
P22830;P22830-2	P22830;P22830-2	HEMH_HUMAN	FECH	Ferrochelatase, mitochondrial	2833.59	3343.47	2056.2	3463.67	2638.25	3160.47	2790.73	3708.05
P23229;P23229-2;P23229-3;P23229-4;P23229-5;P23229-6;P23229-9	P23229;P23229-2;P23229-4;P23229-6;P23229-3;P23229-5;P23229-7;P23229-9	ITA6_HUMAN	ITGA6	Integrin alpha-6							464.204
P23246	P23246;P23246-2	SFPQ_HUMAN	SFPQ	Splicing factor, proline- and glutamine-rich	6651.24	3932.18	6589.37	5443.59	5961.67	3855.55	6761.69	5550.1
P23258	P23258	TBG1_HUMAN	TUBG1	Tubulin gamma-1 chain	3062.19	3141.58	2966.3	2122.98	3255.84	2644.57	3040.22	3151.87
P23284	P23284	PPIB_HUMAN	PPIB	Peptidyl-prolyl cis-trans isomerase B	39118.8	44575.8	38940.8	47750	43632.4	51392	42350.5	48203
P23381;P23381-2	P23381;P23381-2	SYWC_HUMAN	WARS1	Tryptophan--tRNA ligase, cytoplasmic	4367.05	5624.16	5305.47	6083.38	4700.25	5871.13	4520.73	5442.81
P23396	P23396;P23396-2	RS3_HUMAN	RPS3	Small ribosomal subunit protein uS3	93554.7	99949.1	115312	96913.7	101992	101702	105660	88021.8
P23443;P23443-2;P23443-3;P23443-4;P23443-5	P23443;P23443-4;P23443-2;P23443-3;P23443-5	KS6B1_HUMAN	RPS6KB1	Ribosomal protein S6 kinase beta-1	3188.23	2045.73	3205.48	3213.14	2564.5	2441.2	2969.3	3095.75
P23526	P23526;P23526-2	SAHH_HUMAN	AHCY	Adenosylhomocysteinase	41897	54144	40464.4	53416.3	44934.9	54093.4	40366	54464
P23528	P23528;Q9Y281;Q9Y281-3	COF1_HUMAN	CFL1	Cofilin-1	65209.9	65635.1	65287	72553.2	65850.4	63940.5	70106	71701.2
P23786	P23786	CPT2_HUMAN	CPT2	Carnitine O-palmitoyltransferase 2, mitochondrial	1562.06	1630.24	1165.73	1092.44	1233.82	1832.6	1406.3	1265.64
P23919;P23919-2	P23919;P23919-2	KTHY_HUMAN	DTYMK	Thymidylate kinase	2833.32	1248.76	2301.07	1645.28	1514.11	1686.6	1816.16	1478.08
P23921	P23921	RIR1_HUMAN	RRM1	Ribonucleoside-diphosphate reductase large subunit	4818.32	5490.81	4958.66	5545.42	4477.33	6221.46	4858.07	7126.82
P24043	P24043	LAMA2_HUMAN	LAMA2	Laminin subunit alpha-2					1858.87			669.501
P24534	P24534	EF1B_HUMAN	EEF1B2	Elongation factor 1-beta	7611.19	5816.49	8106.19	6242.8	5409.19	7686.49	4677.79	7278.71
P24752	P24752;P24752-2	THIL_HUMAN	ACAT1	Acetyl-CoA acetyltransferase, mitochondrial	4040.39	2874.1	3009.53	3137.81	2709.18	2442.55	3944.24	3717.72
P24928	P24928	RPB1_HUMAN	POLR2A	DNA-directed RNA polymerase II subunit RPB1	1444.48	1437.62	1747.44	1315.87	1962.11	1370.87	1675.45	1796.6
P24941;P24941-2	P24941;P24941-2	CDK2_HUMAN	CDK2	Cyclin-dependent kinase 2	1534.59	1620.99	1892.93	2075.52	1293.38	1716.48	2100.31	2238.22
P25098	P25098;P35626	ARBK1_HUMAN	GRK2	Beta-adrenergic receptor kinase 1	1238.01	1686.32	2599	1944.38	1962.44	1918.15	2034.91	1596.83
P25205;P25205-2	P25205;P25205-2	MCM3_HUMAN	MCM3	DNA replication licensing factor MCM3	16728.5	15671.4	16493.9	15463	14672.9	15970.9	15178	15383.2
P25311	P25311	ZA2G_HUMAN	AZGP1	Zinc-alpha-2-glycoprotein		1256.15						338.272
P25398	P25398	RS12_HUMAN	RPS12	Small ribosomal subunit protein eS12	26493.4	25961.7	31201.3	24141.6	23807.9	19828.3	25916.8	19575.3
P25685	P25685;Q9UDY4;P25685-2	DNJB1_HUMAN	DNAJB1	DnaJ homolog subfamily B member 1	1664.57	1037.87	895.903	1282.72	1212.42	818.404	954.73	999.459
P25705	P25705;P25705-2	ATPA_HUMAN	ATP5F1A	ATP synthase subunit alpha, mitochondrial	31850.4	31027.3	33197.2	30189.9	32282	27552.9	31675.1	29406.8
P25786;P25786-2	P25786;P25786-2	PSA1_HUMAN	PSMA1	Proteasome subunit alpha type-1	5908.16	6010.6	5559.69	6005.58	4047.17	5440.92	4141.16	6637.91
P25787	P25787	PSA2_HUMAN	PSMA2	Proteasome subunit alpha type-2	6842.02	11864.5	6153.41	9116.04	6347.51	8637.15	8096.87	10513
P25788;P25788-2	P25788;P25788-2	PSA3_HUMAN	PSMA3	Proteasome subunit alpha type-3	4317.18	6325.78	5303.81	6155.85	4020.57	6869.5	5415.9	8496.28
P25789	P25789;P25789-2	PSA4_HUMAN	PSMA4	Proteasome subunit alpha type-4	10949.4	10718.3	11505.2	12292.5	11567.6	13799.5	11834.3	16156.7
P26196	P26196	DDX6_HUMAN	DDX6	Probable ATP-dependent RNA helicase DDX6	23131.1	25090.5	26370.9	22960.4	24220.2	24176.1	25052.6	26424.7
P26358;P26358-2;P26358-3	P26358;P26358-2;P26358-3	DNMT1_HUMAN	DNMT1	DNA (cytosine-5)-methyltransferase 1	2528.77	2729.65	2698.55	3827.38	2616.11	3972.19	2949.14	3629.07
P26368;P26368-2	P26368;P26368-2	U2AF2_HUMAN	U2AF2	Splicing factor U2AF 65 kDa subunit	1428.52	2522.69	2718.51	3708.18	2823.81	3433.56	3230.1	2812.12
P26373	P26373;P26373-2	RL13_HUMAN	RPL13	Large ribosomal subunit protein eL13	6198.52	14608.2	11262.4	12031.8	9351.96	16288.8	11515.5	9705.54
P26440;P26440-2	P26440;P26440-2	IVD_HUMAN	IVD	Isovaleryl-CoA dehydrogenase, mitochondrial	2535.12	1393.63	1342.4	1927	2094.68	1285.95	1741.36	2356.89
P26572	P26572	MGAT1_HUMAN	MGAT1	Alpha-1,3-mannosyl-glycoprotein 2-beta-N-acetylglucosaminyltransferase	54357.2	94238.7	49679	65278.9	47670	25972.8	34661.5	45340.9
P26599;P26599-1;P26599-2	P26599;P26599-1;P26599-2	PTBP1_HUMAN	PTBP1	Polypyrimidine tract-binding protein 1	7278.17	7009.1	8210.86	7060.15	8276.25	6708.68	8426.38	7046.92
P26639;P26639-2	A2RTX5;P26639;A2RTX5-2;P26639-2	SYTC_HUMAN	TARS1	Threonine--tRNA ligase 1, cytoplasmic	14959.2	18633.4	13603	17130.6	14305.5	18144.2	15242.7	19678.3
P26640	P26640	SYVC_HUMAN	VARS1	Valine--tRNA ligase	11538.1	10075	11417.3	11159.5	11200.3	11528.6	11780.2	12225.7
P26641;P26641-2	P26641;P26641-2	EF1G_HUMAN	EEF1G	Elongation factor 1-gamma	74438.7	85927.2	84810	83835	69916.2	75668.5	80346.1	82374.5
P26885	P26885	FKBP2_HUMAN	FKBP2	Peptidyl-prolyl cis-trans isomerase FKBP2	2321.8	2580.87	2177.26	3221.38	4324.63	1732.7	2530.98	1187.05
P27105	P27105;P27105-2	STOM_HUMAN	STOM	Stomatin	613.615	1127.52	797.605	1018.92	646.097	806.981	927.768	837.524
P27348	P27348	1433T_HUMAN	YWHAQ	14-3-3 protein theta	2700.19	4010.45	2767.63	2610.77	2677.56	2196.98	3158.92	2429.5
P27635	P27635;Q96L21	RL10_HUMAN	RPL10	Large ribosomal subunit protein uL16	5468.8	6507.34	9508.16	8164.08	7816.33	9162.87	9262.47	7360.8
P27694	P27694	RFA1_HUMAN	RPA1	Replication protein A 70 kDa DNA-binding subunit	8051.77	8044.01	9698.6	8193.02	8702.61	8752.66	7931.12	7992.54
P27695	P27695	APEX1_HUMAN	APEX1	DNA-(apurinic or apyrimidinic site) endonuclease	7634.79	9661.96	6033.28	7777.31	8918.18	9933.41	8328.53	13144.4
P27707	P27707	DCK_HUMAN	DCK	Deoxycytidine kinase	1485.11	1369.72	1331.34	2015.7	1640.66	1145.99	1347.8	1563.91
P27708	P27708	PYR1_HUMAN	CAD	CAD protein	9601.47	9756.62	10612.3	10207.5	9837.88	10543.4	10742.4	9961.69
P27797	P27797	CALR_HUMAN	CALR	Calreticulin	2168.16	4128.18	2315.24	3795.27	1851.83	1956.54	2000.07	2933.55
P27816	P27816;P27816-2;P27816-4;P27816-5;P27816-6	MAP4_HUMAN	MAP4	Microtubule-associated protein 4	1977.9	1919.02	2088.39	2123.66	1726.93	1789.3	2132.18	1993.44
P27824;P27824-2	P27824;P27824-2	CALX_HUMAN	CANX	Calnexin	14680.3	15874.3	16427.3	16308.8	11109.8	13065.7	15459.7	15994.2
P28066	P28066	PSA5_HUMAN	PSMA5	Proteasome subunit alpha type-5	8437.77	8541.3	7817.6	7392.38	6059.79	7998.96	6935.69	8522.31
P28070	P28070	PSB4_HUMAN	PSMB4	Proteasome subunit beta type-4	13511.9	17453.5	11545.6	17349.4	13539.6	17393.2	11977.9	22593.3
P28072	P28072	PSB6_HUMAN	PSMB6	Proteasome subunit beta type-6	16931.2	12029.3	12247.8	12277.8	8988.37	10345.4	9572.31	13778.6
P28074	P28074;P28074-3	PSB5_HUMAN	PSMB5	Proteasome subunit beta type-5	8295.44	10902.7	7237.26	10256	8313.38	11064.6	8535.86	12598.3
P28288	P28288;P28288-2	ABCD3_HUMAN	ABCD3	ATP-binding cassette sub-family D member 3	2367.97	2057.58	1662.2	2170.72	2121.94	2128.11	1623.59	2225.75
P28331;P28331-2;P28331-3;P28331-4;P28331-5	P28331;P28331-2;P28331-3;P28331-4;P28331-5	NDUS1_HUMAN	NDUFS1	NADH-ubiquinone oxidoreductase 75 kDa subunit, mitochondrial	11607.1	10859.5	12819.9	13413.3	11556.4	10477.4	12680.2	12081.3
P28340	P28340	DPOD1_HUMAN	POLD1	DNA polymerase delta catalytic subunit	5666.55	5353.05	6144.83	4961.3	6119.34	6022.58	5949.79	5422.54
P28482	P27361;P28482;P31152;Q16659;P27361-2;P27361-3;P28482-2	MK01_HUMAN	MAPK1	Mitogen-activated protein kinase 1	1570.93	1697.16	1340.54	1081.2	1423.85	894.455	1175.26	1544.73
P28838;P28838-2	P28838;P28838-2	AMPL_HUMAN	LAP3	Cytosol aminopeptidase	3762.93	3561.18	3571.75	3171.21	2466.15	3151.89	3508.6	3603.38
P29083	P29083	T2EA_HUMAN	GTF2E1	General transcription factor IIE subunit 1	574.255	144.035	565.328	195.78				290.107
P29144	P29144	TPP2_HUMAN	TPP2	Tripeptidyl-peptidase 2	2251.41	2271.68	2096.48	2381.56	2539.78	2307.06	2163.6	2212.16
P29218;P29218-3	P29218;P29218-3;P29218-2	IMPA1_HUMAN	IMPA1	Inositol monophosphatase 1	4065.87	4895.63	2870.29	3750.17	3402.03	4595.71	4871.22	5022.03
P29350;P29350-3;P29350-4	P29350;P29350-2;P29350-3;P29350-4	PTN6_HUMAN	PTPN6	Tyrosine-protein phosphatase non-receptor type 6	1571.35	1382.53	1491.76	1664.56	1936.94	1386.14	1385.22	1819.19
P29372;P29372-2;P29372-4;P29372-5	P29372;P29372-4;P29372-2;P29372-5	3MG_HUMAN	MPG	DNA-3-methyladenine glycosylase	2508.59		2273.21	1599.5	1337.11	1888.22	2027.65	1136.09
P29373	P29373	RABP2_HUMAN	CRABP2	Cellular retinoic acid-binding protein 2	2715.47	4499.11	1826.16	4321.05	1636.34	1714.47	1534.32	1470.86
P29401;P29401-2	P29401;P29401-2	TKT_HUMAN	TKT	Transketolase	40250	54905.5	43514	53458.6	44999.3	45056.2	40678.2	45570.7
P29508;P29508-2	P29508;P29508-2	SPB3_HUMAN	SERPINB3	Serpin B3		556.894
P29692-2	P29692;P29692-2	EF1D_HUMAN	EEF1D	Isoform 2 of Elongation factor 1-delta	3182.54	4497.18	3800.17	4863.46	2561.22	2536.27	3942.72	3388.95
P29992	P29992	GNA11_HUMAN	GNA11	Guanine nucleotide-binding protein subunit alpha-11	8515.04	8648.88	7704.03	8149.13	7673.78	6852.68	7216.96	7446.56
P30038;P30038-3	P30038;P30038-3	AL4A1_HUMAN	ALDH4A1	Delta-1-pyrroline-5-carboxylate dehydrogenase, mitochondrial	2375.45	2026.59	2629.83	2353.25	2478.57	2518.59	1377.8	1949.36
P30040	P30040	ERP29_HUMAN	ERP29	Endoplasmic reticulum resident protein 29	7195.8	9319.83	6724.46	7762.97	7281.63	4467.66	7053.5	5817.65
P30041	P30041	PRDX6_HUMAN	PRDX6	Peroxiredoxin-6	113798	109275	112357	106875	99328.5	106365	117355	117105
P30043	P30043	BLVRB_HUMAN	BLVRB	Flavin reductase (NADPH)	7327.35	11140.6	7571.2	10075.2	6879.87	7264.59	8529.88	7838.76
P30044;P30044-2	P30044;P30044-2	PRDX5_HUMAN	PRDX5	Peroxiredoxin-5, mitochondrial	4598.19	3977.48	4859.03	4559.27	4191.26	3584.74	4095.01	4614.69
P30046	P30046;A6NHG4;P30046-2	DOPD_HUMAN	DDT	D-dopachrome decarboxylase	2930.74	2734.15	2211.68	4076.11	2284.51	2391.73	2505.33	3814.36
P30048;P30048-2	P30048;P30048-2	PRDX3_HUMAN	PRDX3	Thioredoxin-dependent peroxide reductase, mitochondrial	17749.3	20622.5	21400.8	22245.5	20871	19097.6	21033.5	19441.7
P30049	P30049	ATPD_HUMAN	ATP5F1D	ATP synthase subunit delta, mitochondrial	1360.78	1997.72	1471.62	1561.47	1177.92	1240.46	1320.08	1469.34
P30050	P30050	RL12_HUMAN	RPL12	Large ribosomal subunit protein uL11	45511.3	48444	48146.3	49873.1	48758.5	49671.7	43793.4	47276.9
P30084	P30084	ECHM_HUMAN	ECHS1	Enoyl-CoA hydratase, mitochondrial	7734.17	6370.51	6876.59	7588.68	5801.53	6617.1	6278.09	6784.29
P30085;P30085-3	P30085;P30085-3	KCY_HUMAN	CMPK1	UMP-CMP kinase	508.032		251.815	383.804	300.239		443.379
P30086	P30086	PEBP1_HUMAN	PEBP1	Phosphatidylethanolamine-binding protein 1	2434.62	6813.68	2209.06	4276.83	1715.02	3466.8	3566.17	3870.86
P30101	P30101	PDIA3_HUMAN	PDIA3	Protein disulfide-isomerase A3	11443.9	9597.97	11588.3	10201.2	9295.46	6934.01	10347.4	8417.79
P30153	P30153	2AAA_HUMAN	PPP2R1A	Serine/threonine-protein phosphatase 2A 65 kDa regulatory subunit A alpha isoform	2281.36	2882.41	2015.04	2909.85	2434.77	1628.01	2774.85	1960.56
P30260;P30260-2	P30260;P30260-2	CDC27_HUMAN	CDC27	Cell division cycle protein 27 homolog	908.522	959.19	1001.24	338.178	826.512		686.953	925.227
P30281;P30281-2;P30281-3	P30281;P30281-2;P30281-3	CCND3_HUMAN	CCND3	G1/S-specific cyclin-D3						351.737		728.397
P30405	P30405;P30405-2	PPIF_HUMAN	PPIF	Peptidyl-prolyl cis-trans isomerase F, mitochondrial	6681.43	9649.94	5589.07	7277.86	7684.95	7872.85	6720.45	8110.4
P30419;P30419-2	P30419;P30419-2	NMT1_HUMAN	NMT1	Glycylpeptide N-tetradecanoyltransferase 1	1732.45	2104.85	1641.02	2349.31	2463.01	2260.6	2586.31	2380.52
P30520	P30520	PURA2_HUMAN	ADSS2	Adenylosuccinate synthetase isozyme 2	4572.06	5171.23	4718.77	4932.54	4671.66	4927.9	5224.64	5980.65
P30566	P30566	PUR8_HUMAN	ADSL	Adenylosuccinate lyase	3739.84	3380.97	4461.29	4762.61	3624.34	2942.91	3444.96	4409.63
P30740	P30740	ILEU_HUMAN	SERPINB1	Leukocyte elastase inhibitor	3740.24	4559.57	4338.99	3881.44	4408.5	4864.73	4758.86	4938.82
P30825	P30825	CTR1_HUMAN	SLC7A1	High affinity cationic amino acid transporter 1	2098.25	1710.09	2539.05	1371.42	1928.54	1705.09	2519.68	2470.27
P30837	P30837	AL1B1_HUMAN	ALDH1B1	Aldehyde dehydrogenase X, mitochondrial	2672.39	2175.61	1733.04	2419.78	1828.75	1833.92	2230.97	2122.47
P30876	P30876	RPB2_HUMAN	POLR2B	DNA-directed RNA polymerase II subunit RPB2	1512.44	2124.64	1778.09	2145.73	1569.76	1775.35	2218.97	2251.47
P31040	P31040	SDHA_HUMAN	SDHA	Succinate dehydrogenase [ubiquinone] flavoprotein subunit, mitochondrial	3083.44	4362.12	2603.93	4065.97	3901.85	4393.36	3917.44	4354.78
P31146	P31146	COR1A_HUMAN	CORO1A	Coronin-1A	548.283	482.423		529.31	584.36	984.375	542.871	515.599
P31150	P31150	GDIA_HUMAN	GDI1	Rab GDP dissociation inhibitor alpha	6168.81	7049.37	5832.27	7246.62	6281.86	6802.75	6936.88	7203.29
P31151	P31151;Q86SG5	S10A7_HUMAN	S100A7	Protein S100-A7	862.467	7831.17	1984.91	10669.4		6298.66	1215.2	1591.76
P31153	P31153;P31153-2	METK2_HUMAN	MAT2A	S-adenosylmethionine synthase isoform type-2	8796.01	10663.1	9399.49	10403.7	8951.59	9446.14	8978.57	10050.8
P31323	P13861;P31323;P13861-2	KAP3_HUMAN	PRKAR2B	cAMP-dependent protein kinase type II-beta regulatory subunit	1255.79	1609.19	2185.12	702.428	1575.07	1047.78	1127.99	1163.33
P31350;P31350-2	P31350;P31350-2	RIR2_HUMAN	RRM2	Ribonucleoside-diphosphate reductase subunit M2	5549.86	5389.54	5242.79	5851.71	5467.43	5244.24	5815.13	6048.13
P31431;P31431-2	P31431;P31431-2	SDC4_HUMAN	SDC4	Syndecan-4	2878.35	2931.93	3363.35	2211.8	2678.49	2855.07	1721.53	1846.96
P31689;P31689-2	P31689;P31689-2	DNJA1_HUMAN	DNAJA1	DnaJ homolog subfamily A member 1	2017.85	2934.31	1966.21	2388.51	3312.19	3102.05	2674.36	3155.49
P31749	P31749;P31749-2	AKT1_HUMAN	AKT1	RAC-alpha serine/threonine-protein kinase	1766.58	1836.68	2082.33	1937.02	2947.56	2427.53	1993.56	2440.49
P31751;P31751-2	P31751;P31751-2	AKT2_HUMAN	AKT2	RAC-beta serine/threonine-protein kinase	1431.21	1696.65	1243.53	1124.57	863.492	1387.15	1344.61	1121.99
P31930	P31930	QCR1_HUMAN	UQCRC1	Cytochrome b-c1 complex subunit 1, mitochondrial	4476.66	5640.74	4111.89	4352.35	3300.21	3772.73	4084.48	4519.68
P31937	P31937	3HIDH_HUMAN	HIBADH	3-hydroxyisobutyrate dehydrogenase, mitochondrial	1432.74	1217.17	1767.28	2235.77	1451.84	1313.45	1996.26	2016.88
P31939	P31939;P31939-2	PUR9_HUMAN	ATIC	Bifunctional purine biosynthesis protein ATIC	45070	42761.9	41587.2	41504.7	43595.5	47379.1	44419.3	42916.6
P31942;P31942-2;P31942-3	P31942;P31942-2;P31942-3;P31942-4;P31942-5;P31942-6	HNRH3_HUMAN	HNRNPH3	Heterogeneous nuclear ribonucleoprotein H3	4023.21	2022.97	2813.08	2924.95	2816.2	2181.39	3200	2360.82
P31943	P31943	HNRH1_HUMAN	HNRNPH1	Heterogeneous nuclear ribonucleoprotein H	18145.9	16753.3	14469.5	16294.4	12898.3	11140	13969.9	14940.2
P31946;P31946-2	P31946;P31946-2	1433B_HUMAN	YWHAB	14-3-3 protein beta/alpha	5000.87	6389.29	4638.59	6118.2	6481.64	3589.38	5767.65	4295.6
P31947;P31947-2	P31947;P31947-2	1433S_HUMAN	SFN	14-3-3 protein sigma	1166.59	1245.99	943.615	1402.41	1087.56	539.822	1168.26	985.29
P31948;P31948-2;P31948-3	P31948;P31948-2;P31948-3	STIP1_HUMAN	STIP1	Stress-induced-phosphoprotein 1	1200.3	2968.46	647.057	1763.26	768.34	485.115	829.066	1403.81
P31949	P31949	S10AB_HUMAN	S100A11	Protein S100-A11	2231.75	9222.73	3603.49	4704.05	4125.65	2662.62	3966.27	1755.89
P32119	P32119	PRDX2_HUMAN	PRDX2	Peroxiredoxin-2	25225.1	36035.3	22127	32148.3	23858.1	27871.4	23981.4	33210.8
P32321;P32321-2	P32321;P32321-2	DCTD_HUMAN	DCTD	Deoxycytidylate deaminase	710.065	1283.7	1148.1	1830.47	2067.89	3129.59	1302.88	1694.53
P32322;P32322-2;P32322-3	P32322;Q96C36;P32322-2;P32322-3	P5CR1_HUMAN	PYCR1	Pyrroline-5-carboxylate reductase 1, mitochondrial	3605.38	3920.71	3693.99	3761.73	3677.98	3235.8	3528.43	3803.74
P32969	P32969	RL9_HUMAN	RPL9	Large ribosomal subunit protein uL6	14575.1	17079.7	17360.2	18520.2	23055.1	22451.7	18351.1	18831.3
P33176	P33176	KINH_HUMAN	KIF5B	Kinesin-1 heavy chain	9083.75	8168.64	8685.13	8487.31	8051.43	7267.37	8572.2	7861.24
P33316;P33316-2	P33316;P33316-2	DUT_HUMAN	DUT	Deoxyuridine 5'-triphosphate nucleotidohydrolase, mitochondrial	7576.71	7106.03	7079.67	7718.67	5920.57	5422.41	7062.72	6261.52
P33897	P33897	ABCD1_HUMAN	ABCD1	ATP-binding cassette sub-family D member 1	960.261	791.523	787.135	924.974	1042.75	1280.28	1016.3	933.526
P33991	P33991	MCM4_HUMAN	MCM4	DNA replication licensing factor MCM4	15880.7	16160.8	15234.1	15891.1	15685.1	14445.5	15649.1	17667.2
P33992	P33992	MCM5_HUMAN	MCM5	DNA replication licensing factor MCM5	20638.9	26281.9	23842.1	23884.7	24299.1	25799.8	24777.8	24051.5
P33993	P33993;P33993-3	MCM7_HUMAN	MCM7	DNA replication licensing factor MCM7	23881.3	25073.3	24570.7	23938.3	22965.6	24732	24146.6	24775
P34896;P34896-2	P34896;P34896-2;P34896-3;P34896-4	GLYC_HUMAN	SHMT1	Serine hydroxymethyltransferase, cytosolic	5333.71	5645.45	4507.19	5364.41	4926.41	6594.43	5228.39	5437.27
P34897;P34897-3	P34897;P34897-3	GLYM_HUMAN	SHMT2	Serine hydroxymethyltransferase, mitochondrial	8974.91	9176.14	7671.44	8877.15	6629.38	7151.51	6856.07	7552.4
P34932	P34932	HSP74_HUMAN	HSPA4	Heat shock 70 kDa protein 4	20493.7	19462.4	18689.1	19226.4	18191.9	19099.7	19788.5	19966.8
P35080-2	P35080;P35080-2	PROF2_HUMAN	PFN2	Isoform IIb of Profilin-2	14681.6	16938.8	13703.6	12966.9	14084	14154.5	12695.3	15476.7
P35221;P35221-2	P26232;P35221;P26232-2;P26232-3;P26232-4;P26232-5;P26232-6;P35221-2;P35221-3	CTNA1_HUMAN	CTNNA1	Catenin alpha-1	1484.56	1538.82	1340.99	1453.34	1132.08	1041.61	1168.51	864.497
P35222	P35222	CTNB1_HUMAN	CTNNB1	Catenin beta-1	3149.3	2188.9	2993.77	2528.75	2597.65	2632.11	2431.15	2020.33
P35232	P35232;P35232-2	PHB1_HUMAN	PHB1	Prohibitin 1	12937.3	11066.8	12624.3	11033	10795	10492.9	11850.6	10815.8
P35237	P35237	SPB6_HUMAN	SERPINB6	Serpin B6	16240.7	17392.1	14945.2	15688.7	13875.6	14492.1	14525.7	16071.7
P35241;P35241-5	P35241;P35241-2;P35241-4;P35241-5	RADI_HUMAN	RDX	Radixin	930.42	798.448	557.919	720.13	341.551	571.094	608.045	693.451
P35244	P35244	RFA3_HUMAN	RPA3	Replication protein A 14 kDa subunit	1538.64	1904.64	1386.69	1992.56	2078.96		1614.94	1130.88
P35249;P35249-2	P35249;P35249-2	RFC4_HUMAN	RFC4	Replication factor C subunit 4	738.427		649.653	677.105	605.479	416.545	932.302	587.934
P35250;P35250-2	P35250;P35250-2	RFC2_HUMAN	RFC2	Replication factor C subunit 2	2631.76	2051.79	2869.03	1974.75	2897.93	1513.79	4011.25	1781.07
P35251;P35251-2	P35251;P35251-2	RFC1_HUMAN	RFC1	Replication factor C subunit 1	433.495	730.321	909.726	990.167	892.077	681.76	776.252	759.095
P35268	P35268	RL22_HUMAN	RPL22	Large ribosomal subunit protein eL22	33852.1	32516.8	38460.7	37185.8	41203.1	39249.3	39808.1	33583.7
P35270	P35270	SPRE_HUMAN	SPR	Sepiapterin reductase	2626.6	2546.23	1908.96	2260.79	2479.27	2047.83	1722.48	2380.51
P35520;P35520-2	P35520;P35520-2	CBS_HUMAN	CBS	Cystathionine beta-synthase	9630.31	8147.86	8839.85	8254.86	9739.01	9275.59	8924.25	8390.03
P35527	P35527	K1C9_HUMAN	KRT9	Keratin, type I cytoskeletal 9	61767	107513	47669.1	25842.9	29302.5	168429	42492.6	104246
P35573	P35573;P35573-2;P35573-3	GDE_HUMAN	AGL	Glycogen debranching enzyme	1697.25	2110.24	1313.14	1399.75	1417.6	1952.28	1674.56	1827.39
P35579	P35579;P35579-2	MYH9_HUMAN	MYH9	Myosin-9	12073.2	11449	12792.7	12313.3	10233.4	10828	12016.8	11212
P35580;P35580-2;P35580-3;P35580-4;P35580-5	P35580;P35580-2;P35580-3;P35580-4;P35580-5	MYH10_HUMAN	MYH10	Myosin-10	5988.76	3860.01	4904.98	5152.87	4008.23	4946.05	4415.55	4372.41
P35606;P35606-2	P35606;P35606-2	COPB2_HUMAN	COPB2	Coatomer subunit beta'	15171.9	18243.8	16072	17021.3	17391.4	18857.7	18449.6	18103.7
P35611;P35611-2;P35611-3;P35611-6	P35611;P35611-2;P35611-3;P35611-4;P35611-5;P35611-6	ADDA_HUMAN	ADD1	Alpha-adducin	2785.78	2537.85	2681.94	3016.37	2545.56	3189.82	3106.3	2802.1
P35613;P35613-2;P35613-3;P35613-4	P35613;P35613-2;P35613-3;P35613-4	BASI_HUMAN	BSG	Basigin	1079.41	2076.51	959.529	1724.67	1161.46	1565.69	1397.64	1374.65
P35658;P35658-2;P35658-3;P35658-4;P35658-5	P35658;P35658-2;P35658-3;P35658-4;P35658-5	NU214_HUMAN	NUP214	Nuclear pore complex protein Nup214	2012.83	2228.95	2050.32	2106.98	2057.84	2294.78	2482.77	1716.37
P35813;P35813-2;P35813-3	P35813;P35813-2;P35813-3	PPM1A_HUMAN	PPM1A	Protein phosphatase 1A	640.087	646.562	841.966	1162.44		718.497	762.958	1308.41
P35908	P35908	K22E_HUMAN	KRT2	Keratin, type II cytoskeletal 2 epidermal	37647.2	90473	8696.15	33682	11756.1	43134.5	12134.5	22296.8
P35998	P35998	PRS7_HUMAN	PSMC2	26S proteasome regulatory subunit 7	18611	16048.5	17741.4	17650.4	16123.2	15616.2	17982.1	16208.2
P36404	P36404;P36404-2	ARL2_HUMAN	ARL2	ADP-ribosylation factor-like protein 2	4996.79	4325.87	4602.19	4360.48	4225.71	4301.47	4939.45	4483.55
P36405	P36405	ARL3_HUMAN	ARL3	ADP-ribosylation factor-like protein 3	10494.8	8899.05	9363.61	9331.07	11572.6	9422.66	11100.1	8891.83
P36507	P36507;Q02750;Q02750-2	MP2K2_HUMAN	MAP2K2	Dual specificity mitogen-activated protein kinase kinase 2	6213.75	5239.81	6204.96	4887.36	5904.31	5429.19	6395.26	5036.55
P36542	P36542;P36542-2	ATPG_HUMAN	ATP5F1C	ATP synthase subunit gamma, mitochondrial	7634.13	8851.41	10088	9715.03	9594.61	10167.2	10354.9	10799.7
P36578	P36578	RL4_HUMAN	RPL4	Large ribosomal subunit protein uL4	7837.65	8824.68	12353.3	8707.19	11414.8	12088.2	12289.6	8673.19
P36639;P36639-1;P36639-2;P36639-3	P36639;P36639-1;P36639-2;P36639-3	8ODP_HUMAN	NUDT1	Oxidized purine nucleoside triphosphate hydrolase	2578.02	2606.6	2287.68	1317.66	2374.65	1700.09	1213.7	1733.33
P36776;P36776-2	P36776;P36776-2;P36776-3	LONM_HUMAN	LONP1	Lon protease homolog, mitochondrial	3083.36	2471.82	2723.56	2535.13	2742.24	2545.85	2950.48	2520.95
P36871;P36871-2	P36871;P36871-2;P36871-3	PGM1_HUMAN	PGM1	Phosphoglucomutase-1	2389.78	1897.03	1823.28	2169.29	2045	1423.11	1812.44	1958.84
P36915;P36915-2	P36915;P36915-2	GNL1_HUMAN	GNL1	Guanine nucleotide-binding protein-like 1	543.358	796.898	523.46	671.157	474.924	365.693	584.079	482.365
P36957	P36957	ODO2_HUMAN	DLST	Dihydrolipoyllysine-residue succinyltransferase component of 2-oxoglutarate dehydrogenase complex, mitochondrial	3050.66	2746.6	3567.12	3762.96	3123.46	3535.57	3577.49	3712.54
P37108	P37108	SRP14_HUMAN	SRP14	Signal recognition particle 14 kDa protein	5529.68	9244.26	6071.14	6503.11	5663	5798.06	5839.13	6399.99
P37802;P37802-2	P37802;P37802-2	TAGL2_HUMAN	TAGLN2	Transgelin-2	2042.77	9055.28	1844.11	5288.29	1995.14	1320.16	2035.07	1626.95
P37837;P37837-2	P37837;P37837-2	TALDO_HUMAN	TALDO1	Transaldolase	15251.8	16102.4	16709.6	18903.6	14253.7	17792.6	16757.4	19028.4
P38117;P38117-2	P38117;P38117-2	ETFB_HUMAN	ETFB	Electron transfer flavoprotein subunit beta	3958.06	3670.84	3978.95	3441.77	2940.7	2463.31	3402.43	2182.41
P38159;Q96E39	P38159;Q96E39;P38159-2;P38159-3	RBMX_HUMAN;RMXL1_HUMAN	RBMX;RBMXL1	RNA-binding motif protein, X chromosome	3706.54	3226.89	4080.89	2886.62	4831.76	2733.33	3378.64	3082.57
P38571;P38571-2	P38571;P38571-2	LICH_HUMAN	LIPA	Lysosomal acid lipase/cholesteryl ester hydrolase	898.492	1191.77	1388.88	1907.4	1192.15	943.611	1625.33	909.479
P38606;P38606-2	P38606;P38606-2	VATA_HUMAN	ATP6V1A	V-type proton ATPase catalytic subunit A	2563.25	3053	3068.7	3324.49	2109.27	2782.45	2850.91	2953.32
P38646	P38646	GRP75_HUMAN	HSPA9	Stress-70 protein, mitochondrial	40016.2	33438.5	38401	34866.3	33031.9	29379.1	34823.1	34122.6
P38919	P38919	IF4A3_HUMAN	EIF4A3	Eukaryotic initiation factor 4A-III	8598.6	8061.17	8299.02	8625.04	8356.32	8593.7	8711.96	8080.55
P39019	P39019	RS19_HUMAN	RPS19	Small ribosomal subunit protein eS19	21163	18392.6	26857.6	16890.8	19241.2	6919.79	21312.7	4578.55
P39023	P39023	RL3_HUMAN	RPL3	Large ribosomal subunit protein uL3	5939.57	9109.53	9478.46	9095.68	6411.18	10291.4	10495.1	9677.53
P39656;P39656-3	P39656;P39656-2;P39656-3	OST48_HUMAN	DDOST	Dolichyl-diphosphooligosaccharide--protein glycosyltransferase 48 kDa subunit	24022.8	26939.4	26791.9	25434.5	29349.2	27649.1	27631.8	26210.1
P39687	P39687;O43423	AN32A_HUMAN	ANP32A	Acidic leucine-rich nuclear phosphoprotein 32 family member A	962.086	2479.74	559.108	1422.6	1032.5	562.942	888.491	517.022
P39748	P39748;P39748-2	FEN1_HUMAN	FEN1	Flap endonuclease 1	2935.51	2569.6	2406.31	1664.33	1530.71	1704.12	1844.52	929.732
P40123	P40123;P40123-2	CAP2_HUMAN	CAP2	Adenylyl cyclase-associated protein 2	5625.57	5946.67	5151.27	5693.25	5626.23	7247.58	6308.74	6888.25
P40227	P40227;P40227-2	TCPZ_HUMAN	CCT6A	T-complex protein 1 subunit zeta	21630.4	17927.8	21039.2	19071.9	17684.1	20438.2	21587.9	20203.1
P40429	P40429;Q6NVV1	RL13A_HUMAN	RPL13A	Large ribosomal subunit protein uL13	11280.8	13809.9	19925.7	17384.2	18639.4	19587.2	21829.9	13496.9
P40616;P40616-2	P40616;P40616-2	ARL1_HUMAN	ARL1	ADP-ribosylation factor-like protein 1	10184.1	18487.1	14297.7	16011.6	14446.3	15215.9	13396.6	16077.9
P40692;P40692-3	P40692;P40692-3	MLH1_HUMAN	MLH1	DNA mismatch repair protein Mlh1	2623.63	2429.51	3599.17	3091.1	4121.2	3189.78	3136.81	2404.8
P40763;P40763-2;P40763-3	P40763;P40763-2;P40763-3	STAT3_HUMAN	STAT3	Signal transducer and activator of transcription 3	1229.7	1215.7	1128.06	1295.53	1254.66	1248.67	1571.74	1248.4
P40818	P40818	UBP8_HUMAN	USP8	Ubiquitin carboxyl-terminal hydrolase 8	9838.01	12664	10620	14847.6	231737	224453	196979	191673
P40925;P40925-3	P40925;P40925-2;P40925-3	MDHC_HUMAN	MDH1	Malate dehydrogenase, cytoplasmic	9922.99	9527.86	10136.1	10834.5	9961.47	8699.2	9939.4	9930.96
P40926	P40926;P40926-2	MDHM_HUMAN	MDH2	Malate dehydrogenase, mitochondrial	28735.3	30800.2	28418.9	32762	25442.7	31770.6	25269.1	35911.3
P40937;P40937-2	P40937;P40937-2	RFC5_HUMAN	RFC5	Replication factor C subunit 5	3365.84	2768.92	3342.66	2702.53	2613.39	3080.21	2959.85	2333.97
P40938;P40938-2	P40938;P40938-2	RFC3_HUMAN	RFC3	Replication factor C subunit 3	2116.25	2142.57	2134.95	1987.16	2091.25	1284.39	1878.85	1498.02
P40939	P40939	ECHA_HUMAN	HADHA	Trifunctional enzyme subunit alpha, mitochondrial	8995.45	8931.41	9004.51	8805.6	9709.45	9916.34	9048.38	9398.56
P41091	P41091;Q2VIR3;Q2VIR3-2	IF2G_HUMAN	EIF2S3	Eukaryotic translation initiation factor 2 subunit 3	14936.3	17077.8	14709.7	16591.3	15751.9	17143.8	14350.4	16973.1
P41214;P41214-2	P41214;P41214-2	EIF2D_HUMAN	EIF2D	Eukaryotic translation initiation factor 2D	1657.48	990.662	1532.35	1144.83	1214.94	1133.52	1684.08	1231.22
P41227;P41227-2	P41227;Q9BSU3;P41227-2	NAA10_HUMAN	NAA10	N-alpha-acetyltransferase 10	6506.48	5048.33	6450.93	5807.29	5435.25	6565.24	4987.74	4439.98
P41240	P41240	CSK_HUMAN	CSK	Tyrosine-protein kinase CSK	3906.02	3176.47	3798.86	4005.54	3789.28	4018.37	3981.51	3550.09
P41250;P41250-2	P41250;P41250-2	GARS_HUMAN	GARS1	Glycine--tRNA ligase	5416.98	6660.77	5021.83	6103.4	4987.24	7798.57	6144.65	8204.62
P41252	P41252	SYIC_HUMAN	IARS1	Isoleucine--tRNA ligase, cytoplasmic	24575.2	26690.3	29704.2	26561.8	26601.7	31704.1	30372.7	30035.5
P41743	P41743	KPCI_HUMAN	PRKCI	Protein kinase C iota type	3060.21	3530.26	3528.25	4039.93	3175.07	3347.65	3415.09	4496.12
P42126;P42126-2	P42126;P42126-2	ECI1_HUMAN	ECI1	Enoyl-CoA delta isomerase 1, mitochondrial	3105.54	3761.45	3775	3024.18	2885.56	3361.31	3135.99	2995.92
P42224	P42224;P42224-2	STAT1_HUMAN	STAT1	Signal transducer and activator of transcription 1-alpha/beta	4376.65	4120.41	4276.74	4174.21	3960.54	4216.54	4391.19	4939.94
P42262-4	P42262-4	GRIA2_HUMAN	GRIA2	Isoform 4 of Glutamate receptor 2			1689.52				2773.07
P42285	P42285	MTREX_HUMAN	MTREX	Exosome RNA helicase MTR4	2195.21	2360.1	2433.28	2224.78	2434.73	2394.26	2836.12	2341.65
P42345	P42345	MTOR_HUMAN	MTOR	Serine/threonine-protein kinase mTOR	775.061	891.74	592.923		1103.55	983.744	1502.19	626.78
P42356	P42356	PI4KA_HUMAN	PI4KA	Phosphatidylinositol 4-kinase alpha	844.784	831.96	811.136	703.976	279.666	723.833	1254.11	916.931
P42677	P42677;Q71UM5	RS27_HUMAN	RPS27	Small ribosomal subunit protein eS27	29750.4	18284.7	27059.7	22820.2	29282.6	29583.3	25705.8	27020
P42704	P42704	LPPRC_HUMAN	LRPPRC	Leucine-rich PPR motif-containing protein, mitochondrial	16111.1	12875.2	16658.1	13585.1	15702.3	11505.7	16615.3	14190
P42765	P42765	THIM_HUMAN	ACAA2	3-ketoacyl-CoA thiolase, mitochondrial	11405.6	11184.5	9167.99	11311.4	8453.44	13456.2	9948.84	14790.6
P42766	P42766	RL35_HUMAN	RPL35	Large ribosomal subunit protein uL29	7201.36	10627.5	13381	15176.9	10267.8	19784.9	13035.1	11590.3
P42785;P42785-2	P42785;P42785-2	PCP_HUMAN	PRCP	Lysosomal Pro-X carboxypeptidase	842.1	705.618	506.765	858.813	1455.24	593.103	761.077	1148.31
P42858	P42858	HD_HUMAN	HTT	Huntingtin	1334.32	1127.76	1616.9	1283.67	1672.96	1226.6	1546.89	1556.75
P43007	P43007	SATT_HUMAN	SLC1A4	Neutral amino acid transporter A	404.013	741.833	405.851		1219.32	400.723	755.159	820.203
P43034	P43034	LIS1_HUMAN	PAFAH1B1	Platelet-activating factor acetylhydrolase IB subunit beta	3496.73	5292.87	3782.33	4973.85	5213.49	5028.64	5146.65	5364.17
P43246	P43246;P43246-2	MSH2_HUMAN	MSH2	DNA mismatch repair protein Msh2	6675.41	6202.39	6450.48	6916.25	6428.62	6685.15	6817.86	6129.32
P43304;P43304-2	P43304;P43304-2	GPDM_HUMAN	GPD2	Glycerol-3-phosphate dehydrogenase, mitochondrial	754.965	1764.76	994.444	1046.98	880.644	1253.45	981.225	921.674
P43487;P43487-2	P43487;P43487-2	RANG_HUMAN	RANBP1	Ran-specific GTPase-activating protein	2865.08	3236.23	2987.58	2761.65	2970.19	2875.62	3477.13	3014.22
P43490	P43490	NAMPT_HUMAN	NAMPT	Nicotinamide phosphoribosyltransferase	7629.82	7207.75	7667.98	6803.31	5821.52	5834.86	6797.42	6293.97
P43686	P43686	PRS6B_HUMAN	PSMC4	26S proteasome regulatory subunit 6B	4609.78	4909.33	4823.36	4488.7	3636.92	3490.61	4320.38	4144.59
P43897	P43897;P43897-2	EFTS_HUMAN	TSFM	Elongation factor Ts, mitochondrial	4495.48	4296.98	3805.14	3630.57	4224.49	4271.67	3839.61	4036.08
P45880	P45880;P45880-1;P45880-2	VDAC2_HUMAN	VDAC2	Voltage-dependent anion-selective channel protein 2	32588.1	42216.2	34638.5	41252.2	36259.5	42782.2	34839.3	39161.6
P45954;P45954-2	P45954;P45954-2	ACDSB_HUMAN	ACADSB	Short/branched chain specific acyl-CoA dehydrogenase, mitochondrial	2160.42	2617.41	2545.65	1977.36	1946	1466.89	2219.34	2318.09
P45974;P45974-2	P45974;P45974-2	UBP5_HUMAN	USP5	Ubiquitin carboxyl-terminal hydrolase 5	17231.4	25205.6	15714.3	28844.1	588920	570291	501653	509744
P45984;P45984-2;P45984-3;P45984-4	P45984;P45984-2;P45984-3;P45984-4	MK09_HUMAN	MAPK9	Mitogen-activated protein kinase 9	2316.06	2910.44	2295.84	2286.29	3355.18	2621.95	1727.53	1938.46
P46013;P46013-2	P46013;P46013-2	KI67_HUMAN	MKI67	Proliferation marker protein Ki-67	602.975	663.449	832.579	932.964	1089.08	652.635	715.179	652.24
P46060	P46060	RAGP1_HUMAN	RANGAP1	Ran GTPase-activating protein 1	2511.1	1995.59	2110.36	2041.68	2111.18	1449.74	2057.91	1564.29
P46063	P46063	RECQ1_HUMAN	RECQL	ATP-dependent DNA helicase Q1	9592.34	10913	10036.3	10934.5	12650	10896	10462.8	10954.5
P46087;P46087-2;P46087-3;P46087-4	P46087;P46087-2;P46087-3;P46087-4	NOP2_HUMAN	NOP2	Probable 28S rRNA (cytosine(4447)-C(5))-methyltransferase	1872.14	2130.88	2405.52	2414.1	2407.55	2205.31	2547.61	2202.69
P46199	P46199	IF2M_HUMAN	MTIF2	Translation initiation factor IF-2, mitochondrial	2496.44	1994.4	2377.14	1587.81	1579.25	1766.57	2091.31	1656.56
P46379;P46379-2;P46379-3;P46379-4;P46379-5	P46379;P46379-2;P46379-3;P46379-4;P46379-5	BAG6_HUMAN	BAG6	Large proline-rich protein BAG6	5032.5	6912.01	7504.7	6528.75	4090.54	3811.28	6341.53	7130.41
P46459	P46459;P46459-2	NSF_HUMAN	NSF	Vesicle-fusing ATPase	7267.9	5768.67	7278.08	7145.34	6478.57	6539.14	7345.75	6759.09
P46734;P46734-2;P46734-3	P46734;P46734-2;P46734-3	MP2K3_HUMAN	MAP2K3	Dual specificity mitogen-activated protein kinase kinase 3	1916.96	1455.72	1509.67	2189.51	1223.21	1231.46	1536.95	1781.44
P46736;P46736-2;P46736-3	P46736;P46736-2;P46736-3;P46736-4;P46736-5	BRCC3_HUMAN	BRCC3	Lys-63-specific deubiquitinase BRCC36	1997.48	3181.3	2257.25	1947.3	1662.01	2282.29	1721.15	1665.05
P46776	P46776	RL27A_HUMAN	RPL27A	Large ribosomal subunit protein uL15	23358	27954.2	38362.2	32155.4	37394.8	39926.6	37444.7	32152
P46777	P46777	RL5_HUMAN	RPL5	Large ribosomal subunit protein uL18	25544	24800.2	35911.2	28836.5	31949.3	31116.3	32927.7	31934.2
P46778	P46778	RL21_HUMAN	RPL21	Large ribosomal subunit protein eL21	14987.3	22481.2	25353.9	25891.7	25206.7	28504.6	25668.3	24309.5
P46779;P46779-2;P46779-3;P46779-4;P46779-5	P46779;P46779-2;P46779-3;P46779-4;P46779-5	RL28_HUMAN	RPL28	Large ribosomal subunit protein eL28	3010.02	3390.93	4288.06	3490.98	4743.21	5435.66	4361.89	3729.7
P46781	P46781	RS9_HUMAN	RPS9	Small ribosomal subunit protein uS4	10249.3	22347.7	22963.7	22251.1	12815	29776.4	21731.9	20340
P46782	P46782	RS5_HUMAN	RPS5	Small ribosomal subunit protein uS7	10482.4	7629.92	12583.5	7864.1	10208.6	3158.58	11150.9	2823.49
P46783	P46783;Q9NQ39	RS10_HUMAN	RPS10	Small ribosomal subunit protein eS10	7595.59	8191.04	12342.4	6724.73	9188.15	3205.03	9156.06	2638.22
P46821	P46821	MAP1B_HUMAN	MAP1B	Microtubule-associated protein 1B	957.966	862.165		309.726
P46926	P46926;Q8TDQ7;Q8TDQ7-2;P46926-2;Q8TDQ7-3	GNPI1_HUMAN	GNPDA1	Glucosamine-6-phosphate isomerase 1	2305.75	2475.29	2010.71	2810.1	2280.63	2827.46	3058.1	3080.27
P46934-4	P46934-4	NEDD4_HUMAN	NEDD4	Isoform 4 of E3 ubiquitin-protein ligase NEDD4	738.863	1373.07	892.468	793.717	861.933	1534.95	1080.28	1031.53
P46940	P46940	IQGA1_HUMAN	IQGAP1	Ras GTPase-activating-like protein IQGAP1	11275.4	11785.2	10892.5	11511.1	7828.51	7822.33	8218.1	8671.02
P46976;P46976-2;P46976-3	P46976;P46976-2;P46976-3	GLYG_HUMAN	GYG1	Glycogenin-1	2343.32	2653.62	1506.18	1190.31	2162.68		1379.36	1772.61
P46977	P46977;P46977-2	STT3A_HUMAN	STT3A	Dolichyl-diphosphooligosaccharide--protein glycosyltransferase subunit STT3A	7559.36	7690.57	8332.91	8091.03	9489.43	9367	10693	8117.82
P47755	P47755	CAZA2_HUMAN	CAPZA2	F-actin-capping protein subunit alpha-2	4674.34	5500.72	4900.57	5941.26	4568.97	4871.37	4188.26	5833.31
P47756	P47756;P47756-1	CAPZB_HUMAN	CAPZB	F-actin-capping protein subunit beta	19233.3	23565.1	20221.8	19074.2	22906	22259.2	24089.8	24741.5
P47897	P47897;P47897-2	SYQ_HUMAN	QARS1	Glutamine--tRNA ligase	3784.27	4280.72	4239.25	4308.13	4255.6	4345.5	4380.59	4058.4
P47914	P47914	RL29_HUMAN	RPL29	Large ribosomal subunit protein eL29	582.019	961.035	2599.46	983.112	1227.37	1113.88	2451.82	561.406
P47985	P47985;P0C7P4	UCRI_HUMAN	UQCRFS1	Cytochrome b-c1 complex subunit Rieske, mitochondrial	2896.2	4460.56	2506.31	3517.61	2910.02	3273.86	2815.24	4115.49
P48047	P48047	ATPO_HUMAN	ATP5PO	ATP synthase subunit O, mitochondrial	3623.8	4357.03	3405.14	4278.34	4269.36	3739.64	4327.7	3729.86
P48147	P48147	PPCE_HUMAN	PREP	Prolyl endopeptidase	858.847	1216.49	752.833	1155.6	978.688	1028.19	810.093	895.446
P48163	P48163;P48163-2	MAOX_HUMAN	ME1	NADP-dependent malic enzyme	2788.14	2582.31	1940.1	2701.77	1475.49	2143.9	2400.28	2875.86
P48444	P48444	COPD_HUMAN	ARCN1	Coatomer subunit delta	8536.73	9198.74	9483.91	9180.83	9924.84	9860.06	9940.94	10163.8
P48449;P48449-3	P48449;P48449-2;P48449-3	LSS_HUMAN	LSS	Lanosterol synthase	884.246	1053.31	1436.87	784.611	726.992	1379.69	1119.93	893.551
P48506	P48506	GSH1_HUMAN	GCLC	Glutamate--cysteine ligase catalytic subunit	4144.96	3733.81	4949.38	4268.02	4575.02	4233.08	4390.74	3734.57
P48507	P48507	GSH0_HUMAN	GCLM	Glutamate--cysteine ligase regulatory subunit	2060.82	2193.29	1960.75	1416.93	1594.64	1470.2	1752.74	1972.62
P48556	P48556	PSMD8_HUMAN	PSMD8	26S proteasome non-ATPase regulatory subunit 8	3594.04	3653.34	4338.55	3544.69	3802	3002.53	4642.48	4125.57
P48637	P48637;P48637-2	GSHB_HUMAN	GSS	Glutathione synthetase	3118.29	2589.32	2937.23	2840.64	2781.49	3057.19	2675.37	2948.77
P48643;P48643-2	P48643;P48643-2	TCPE_HUMAN	CCT5	T-complex protein 1 subunit epsilon	17992.3	18409.1	18748.4	19760.3	17472.2	17106.5	18527.4	18735.3
P48651;P48651-2;P48651-3	P48651;P48651-2;P48651-3	PTSS1_HUMAN	PTDSS1	Phosphatidylserine synthase 1	1097.78	1593.42	1049.71	1770.29	1197.92	1701.44	1072.66	1568.76
P48729;P48729-3	P48729;Q8N752;P48729-2;P48729-3	KC1A_HUMAN	CSNK1A1	Casein kinase I isoform alpha	4567.07	5173.36	5845.44	6424.11	5735.31	6822.71	6206.94	6548.3
P48730;P48730-2;P49674	P48730;P48730-2;P49674	KC1D_HUMAN;KC1E_HUMAN	CSNK1D;CSNK1E	Casein kinase I isoform delta	1442.17	3520.61	4206.87		3361.98	4378.28	4608.43	4970.25
P48735	P48735;P48735-2	IDHP_HUMAN	IDH2	Isocitrate dehydrogenase [NADP], mitochondrial	11797	10354.2	11863.1	11093.3	10468.2	11146.2	11036.2	11919.9
P48740-2;P48740-4	P48740-2;P48740-4	MASP1_HUMAN	MASP1	Isoform 2 of Mannan-binding lectin serine protease 1	7693.54	10916.7	6869.6	9577.81	8366.99	10309.3	7345.28	8417.43
P49005	P49005	DPOD2_HUMAN	POLD2	DNA polymerase delta subunit 2	2227.39	2213.38	2410.93	1899.28	2405.55	1948.15	1696.11	2098.21
P49189	P49189;P49189-2;P49189-3	AL9A1_HUMAN	ALDH9A1	4-trimethylaminobutyraldehyde dehydrogenase	7168.98	7511.23	5227.63	8997.9	6476.57	8673.24	5724.09	10312.5
P49207	P49207	RL34_HUMAN	RPL34	Large ribosomal subunit protein eL34	2212.06	2504.75	3868.99	2956.21	4117.79	3828.77	4953.43	3200.74
P49257	P49257	LMAN1_HUMAN	LMAN1	Protein ERGIC-53	2433.06	1996.88	3030.05	2310.93	2172.6	2348.05	2147.49	2590.39
P49327	P49327	FAS_HUMAN	FASN	Fatty acid synthase	123188	145371	128662	138839	116592	119434	116671	121410
P49366	P49366;P49366-3	DHYS_HUMAN	DHPS	Deoxyhypusine synthase	1987.11	1396.96	2203.14	1590.03	1641.6	1728.6	1739.52	1846.27
P49368	P49368;P49368-2	TCPG_HUMAN	CCT3	T-complex protein 1 subunit gamma	23038.7	16062.4	20462.1	17911.4	19456.7	14869.3	20233.6	16088.3
P49406	P49406	RM19_HUMAN	MRPL19	Large ribosomal subunit protein bL19m	5362.51	6471.28	6008.86	6850.73	7211.78	7205.74	6796.19	6321.71
P49407;P49407-2	P49407;P49407-2	ARRB1_HUMAN	ARRB1	Beta-arrestin-1	2898.66	2294.25	2296.05	3117.45	2835.09	2862.87	2689.72	3439.61
P49411	P49411	EFTU_HUMAN	TUFM	Elongation factor Tu, mitochondrial	44624.3	45478.2	41993.5	38848.6	40823.1	41761.4	42094.7	39827.2
P49419-2	P49419;P49419-2;P49419-4	AL7A1_HUMAN	ALDH7A1	Isoform 2 of Alpha-aminoadipic semialdehyde dehydrogenase	1995.05	2561.18	2492.24	2236.05	1912.02	2131.88	1695.29	2654.39
P49458	P49458	SRP09_HUMAN	SRP9	Signal recognition particle 9 kDa protein	8281.52	10034.7	5971.3	8527.01	9593.66	8610.06	7491.92	7239.6
P49585	P49585;Q9Y5K3;Q9Y5K3-2;Q9Y5K3-3;Q9Y5K3-4	PCY1A_HUMAN	PCYT1A	Choline-phosphate cytidylyltransferase A	1888.2	2059.02	1623.84	2244.14	1804.87	1409.11	1929.44	2178.07
P49588	P49588;P49588-2	SYAC_HUMAN	AARS1	Alanine--tRNA ligase, cytoplasmic	21407.6	16526	17468.6	18777.9	16982.6	14790.4	18303.9	19459.9
P49589;P49589-2;P49589-3	P49589;P49589-2;P49589-3	SYCC_HUMAN	CARS1	Cysteine--tRNA ligase, cytoplasmic	2280.96	1884.35	2266.74	1721.21	1685.14	1770.35	2006.59	1803.59
P49591	P49591	SYSC_HUMAN	SARS1	Serine--tRNA ligase, cytoplasmic	9141.5	8378.7	9195.84	8161.2	7614.67	8828.45	8258.89	8187.07
P49642	P49642	PRI1_HUMAN	PRIM1	DNA primase small subunit	1083.18	1450.19	1420.78	1044.47	1007.36	1360.26	1306.65	1245.24
P49643	P49643	PRI2_HUMAN	PRIM2	DNA primase large subunit							551.983	406.066
P49720	P49720	PSB3_HUMAN	PSMB3	Proteasome subunit beta type-3	6140.38	7925.8	5887.93	7427.22	5864.11	7879.51	5716.75	11574
P49721	P49721	PSB2_HUMAN	PSMB2	Proteasome subunit beta type-2	3162.87	3945.64	3669.51	4450.8	2717.62	4245.14	3660.7	4881.7
P49736	P49736	MCM2_HUMAN	MCM2	DNA replication licensing factor MCM2	21429.7	21611	22341.5	22373.8	22276.6	20587.8	22368	22231.1
P49748;P49748-2;P49748-3	P49748;P49748-2;P49748-3	ACADV_HUMAN	ACADVL	Very long-chain specific acyl-CoA dehydrogenase, mitochondrial	2010.99	1664.14	1430.5	1740.68	1188.73	1583.7	1490.15	1292.28
P49755	P49755	TMEDA_HUMAN	TMED10	Transmembrane emp24 domain-containing protein 10	12980.1	11779.4	12480.3	12589.8	12345.8	9666.88	9764.48	11843.7
P49773	P49773	HINT1_HUMAN	HINT1	Adenosine 5'-monophosphoramidase HINT1	1336.25	1607.75	1481.75	1565.16	1347.93	1292.01	1136.31	1869.58
P49792	P49792;Q99666;A6NKT7;O14715;P0DJD0;P0DJD1;Q7Z3J3	RBP2_HUMAN	RANBP2	E3 SUMO-protein ligase RanBP2	2243.76	2216.47	2228.26	2600.97	2451.51	2553.05	2322.21	2782.05
P49796-2	P49796-2	RGS3_HUMAN	RGS3	Isoform 2 of Regulator of G-protein signaling 3			3304.18				2417.06	2964.06
P49821;P49821-2	P49821;P49821-2	NDUV1_HUMAN	NDUFV1	NADH dehydrogenase [ubiquinone] flavoprotein 1, mitochondrial	3634.81	3147.4	2889.56	2640.64	1871.85	3357.17	2548.13	2664.53
P49840	P49840	GSK3A_HUMAN	GSK3A	Glycogen synthase kinase-3 alpha	4727.61	4894.06	5806.49	6525.58	6118.29	6455.54	5710.49	5963.44
P49841;P49841-2	P49841;P49841-2	GSK3B_HUMAN	GSK3B	Glycogen synthase kinase-3 beta				894.986		267.153		971.738
P49915	P49915;P49915-2	GUAA_HUMAN	GMPS	GMP synthase [glutamine-hydrolyzing]	20000.4	18333.5	18453.1	17622	19521.3	16121.3	20428.4	15949.1
P49916;P49916-3	P49916;P49916-3	DNLI3_HUMAN	LIG3	DNA ligase 3	3120.63	2625.29	2715.9	3474.7	2827.14	3662.63	3227.17	3633.26
P49959;P49959-2;P49959-3	P49959;P49959-2;P49959-3	MRE11_HUMAN	MRE11	Double-strand break repair protein MRE11	2875.92	3013.6	3155.41	3083.39	2515.39	2525.55	2959.34	2865.1
P50213	P50213;P50213-2	IDH3A_HUMAN	IDH3A	Isocitrate dehydrogenase [NAD] subunit alpha, mitochondrial	2098.84	2661.72	2289.23	1725.46	2641.14	1759.49	2147.23	2130.63
P50225;P50226	P0DMM9;P0DMN0;P50225;P50226;P0DMM9-3;P50225-2	ST1A1_HUMAN;ST1A2_HUMAN	SULT1A1;SULT1A2	Sulfotransferase 1A1	1566.8	1780.06	1991.63	1614.99	905.244	1300.78	1349.01	1439.64
P50395	P50395;P50395-2	GDIB_HUMAN	GDI2	Rab GDP dissociation inhibitor beta	43983.2	45810.8	42226.1	46607.5	42453	46893	44349.4	48384.8
P50402	P50402	EMD_HUMAN	EMD	Emerin		694.096	605.388	551.2	288.91
P50416	P50416;P50416-2	CPT1A_HUMAN	CPT1A	Carnitine O-palmitoyltransferase 1, liver isoform	10010.7	11951.9	10313	11993.7	12481.7	10962.3	12050.7	10509.2
P50443	P50443	S26A2_HUMAN	SLC26A2	Sulfate transporter	2334.12	1971.28	2785.09	2691.2	3361.03	3463.74	3359.08	2969.19
P50453	P50453	SPB9_HUMAN	SERPINB9	Serpin B9	380.458	2467.24	476.26	444.648	1173.9	610.046		510.499
P50454	P50454	SERPH_HUMAN	SERPINH1	Serpin H1	29167.9	31043.1	30808.8	30611.2	30066.6	28030.3	29301.3	30106.7
P50502;Q8IZP2;Q8NFI4	P50502;Q8IZP2;Q8NFI4	F10A1_HUMAN;F10A5_HUMAN;ST134_HUMAN	ST13;ST13P4;ST13P5	Hsc70-interacting protein	2018.69	2164.9	1437.25	1991.2	1872.52	1153.17	1397.3	1362.64
P50552	P50552	VASP_HUMAN	VASP	Vasodilator-stimulated phosphoprotein	4702.1	5792.51	5833.71	5356.58	9392.03	7349.07	8500.69	7676.35
P50570;P50570-5	P50570;P50570-2;Q9UQ16;P50570-3;P50570-4;P50570-5;Q9UQ16-2;Q9UQ16-3;Q9UQ16-4	DYN2_HUMAN	DNM2	Dynamin-2	7505.28	6160.93	7288.49	5980.32	7691.17	7709.68	8623.44	6769.94
P50579;P50579-2;P50579-3	P50579;P50579-2;P50579-3	MAP2_HUMAN	METAP2	Methionine aminopeptidase 2	1230.29	1215.13	1496.84	1569.83	889.16	1735.39	1621.89	1091.3
P50583	P50583	AP4A_HUMAN	NUDT2	Bis(5'-nucleosyl)-tetraphosphatase [asymmetrical]		3754.07	2015.51	1584.84		4439.62	4720.61	2588.11
P50748	P50748;P50748-2	KNTC1_HUMAN	KNTC1	Kinetochore-associated protein 1	945.609	1250.05	1449.41	1084.86	1635.05	1246.08	1621.63	1453.21
P50750;P50750-2	P50750;P50750-2	CDK9_HUMAN	CDK9	Cyclin-dependent kinase 9	3192.37	2515.92	1662.64	1731.17	3807.7	1400.34	2491.72	1394.5
P50851-2	P50851;P50851-2	LRBA_HUMAN	LRBA	Isoform 2 of Lipopolysaccharide-responsive and beige-like anchor protein	6640.97	7955.35	7546.22	6806.76	8651.72	7790.23	8700.93	7441.61
P50895	P50895	BCAM_HUMAN	BCAM	Basal cell adhesion molecule	865.908	425.732	495.433	906.171	1024.09	507.311	832.418	308.271
P50914	P50914	RL14_HUMAN	RPL14	Large ribosomal subunit protein eL14	17828.9	22545.7	23408.7	20042	21215.6	25470.2	24521.9	18139
P50990;P50990-2	P50990;P50990-2;P50990-3	TCPQ_HUMAN	CCT8	T-complex protein 1 subunit theta	56929.8	47375.6	55332	51253.6	47982	47156.5	54062.3	49324.4
P50991	P50991;P50991-2	TCPD_HUMAN	CCT4	T-complex protein 1 subunit delta	24500	22112.8	24116.2	24273.6	19974.4	20019.4	24471.3	23001.6
P50995;P50995-2	P50995;P50995-2	ANX11_HUMAN	ANXA11	Annexin A11	1482.03	852.576	1824.26	1266.7	1802.78	1593.54	1787.89	1599.85
P51003	P51003;P51003-2	PAPOA_HUMAN	PAPOLA	Poly(A) polymerase alpha	4342.84	5189.32	5588.16	3826.87	4751.28	3892	4117.08	4121.9
P51114;P51114-2	P51114;P51114-2;P51114-3	FXR1_HUMAN	FXR1	RNA-binding protein FXR1	20991.2	19296	19236.3	20534.8	22670.1	18932.7	21140.9	21510.7
P51116	P51116	FXR2_HUMAN	FXR2	RNA-binding protein FXR2	2217.41	2479.38	2458.9	2130.02	2959.03	2678.09	2882.81	1864.26
P51148;P51148-2	P20339;P51148;P61020;P51148-2;P20339-2;P61020-2	RAB5C_HUMAN	RAB5C	Ras-related protein Rab-5C	41506.4	56843.2	46489.8	60156.6	44932.4	73276.8	51850	66794.8
P51149	P51149	RAB7A_HUMAN	RAB7A	Ras-related protein Rab-7a	14039.5	17001.5	13084.8	16199.7	13663.4	19087.4	14564.5	21081.9
P51153	P51153	RAB13_HUMAN	RAB13	Ras-related protein Rab-13	10590.4	11559.8	10548.8	11087.8	10633.4	11428.6	12386.9	10340.7
P51532;P51532-2;P51532-3;P51532-4;P51532-5	P51531;P51532;P51531-2;P51532-2;P51532-3;P51532-4;P51532-5	SMCA4_HUMAN	SMARCA4	Transcription activator BRG1	1192.7	955.466	1570.5	1454.77	1513.56	1238.78	1415.53	1042.76
P51553;P51553-2	P51553;P51553-2	IDH3G_HUMAN	IDH3G	Isocitrate dehydrogenase [NAD] subunit gamma, mitochondrial	2035.19	1425.75	2810.8	1918.43	1996.78	2107.09	2635.37	1477.16
P51570	P51570	GALK1_HUMAN	GALK1	Galactokinase	2456.54	2556.69	2481.33	2539.1	2739.56	2395.6	2354.47	2488.54
P51571	P51571	SSRD_HUMAN	SSR4	Translocon-associated protein subunit delta	11091.9	15108.8	11590.5	15334	12870.3	11172.3	14196.5	13204.4
P51572;P51572-2	P51572;P51572-2	BAP31_HUMAN	BCAP31	B-cell receptor-associated protein 31	790.739	598.71	481.03	784.7	680.476	727.809	346.665	750.097
P51610;P51610-2;P51610-4	P51610;P51610-2;P51610-3;P51610-4	HCFC1_HUMAN	HCFC1	Host cell factor 1	3853.46	3194.07	4119.85	3502.46	3830.82	3244.84	4056.2	3476.66
P51648;P51648-2	P51648;P51648-2	AL3A2_HUMAN	ALDH3A2	Aldehyde dehydrogenase family 3 member A2	119.419	109.744			182.809		158.564
P51649;P51649-2	P51649;P51649-2	SSDH_HUMAN	ALDH5A1	Succinate-semialdehyde dehydrogenase, mitochondrial	2153.02	1290.39	2198.31	1583.04	2053.41	1936.39	1931.44	2291.18
P51659	P51659	DHB4_HUMAN	HSD17B4	Peroxisomal multifunctional enzyme type 2	13750.7	16370.7	14146.8	15586.9	14841.7	15426.9	15229.6	13785.7
P51665	P51665	PSMD7_HUMAN	PSMD7	26S proteasome non-ATPase regulatory subunit 7	3939.49	4730.55	3977.09	5179.27	3872.34	4028.75	4566.36	4470.7
P51668;Q9Y2X8	P51668;Q9Y2X8	UB2D1_HUMAN;UB2D4_HUMAN	UBE2D1;UBE2D4	Ubiquitin-conjugating enzyme E2 D1	3247.24	3895.51	2930.9	3453.26	2254.38	3408.4		2656.04
P51784	P51784	UBP11_HUMAN	USP11	Ubiquitin carboxyl-terminal hydrolase 11	1599.79	1403.41	1150.62	431.996	10341.6	12116	10687.6	10566
P51790;P51790-2;P51790-4;P51790-5;P51793;P51793-2;P51795;P51795-1	P51790;P51793;P51795;P51790-2;P51790-4;P51790-5;P51793-2;P51795-1	CLCN3_HUMAN;CLCN4_HUMAN;CLCN5_HUMAN	CLCN3;CLCN4;CLCN5	H(+)/Cl(-) exchange transporter 3								354.438
P51808	P51808	DYLT3_HUMAN	DYNLT3	Dynein light chain Tctex-type 3		416.898	449.532	142.342		492.712	555.147	1075.63
P51809;P51809-2;P51809-3	P51809;P51809-2;P51809-3	VAMP7_HUMAN	VAMP7	Vesicle-associated membrane protein 7	1040.33	824.864		1171.34	1237.92	1223.96	1501.9	1255.69
P51812	P51812;Q15349;Q15418;Q9UK32;Q15349-2;Q15349-3;Q15418-2;Q15418-3;Q15418-4;Q9UK32-2	KS6A3_HUMAN	RPS6KA3	Ribosomal protein S6 kinase alpha-3	3954.27	3663.54	3629.19	2973.18	3596.31	2998.75	3218.3	3529.49
P51841	P51841	GUC2F_HUMAN	GUCY2F	Retinal guanylyl cyclase 2	2506.3	3228.84	3293.92	2974.26		2933.91	3280.43	1746.46
P51858	P51858;P51858-2;P51858-3	HDGF_HUMAN	HDGF	Hepatoma-derived growth factor		602.56	186.82	308.319
P51965;P51965-2;P51965-3;Q969T4;Q96LR5	P51965;Q969T4;Q96LR5;P51965-2;P51965-3	UB2E1_HUMAN;UB2E2_HUMAN;UB2E3_HUMAN	UBE2E1;UBE2E2;UBE2E3	Ubiquitin-conjugating enzyme E2 E1	5341.96	5566.83	4522.12	4418.69	5071.42	5745.95	5420.55	4072.13
P51991;P51991-2	P51991;P51991-2	ROA3_HUMAN	HNRNPA3	Heterogeneous nuclear ribonucleoprotein A3	3452.42	5503.96	4197.96	4082.86	4899.98	5282.35	5000.6	4981.91
P52209;P52209-2	P52209;P52209-2	6PGD_HUMAN	PGD	6-phosphogluconate dehydrogenase, decarboxylating	20954.9	18169.2	20966.8	18946	17713.6	17828.2	21470.2	19852.1
P52272;P52272-2	P52272;P52272-2	HNRPM_HUMAN	HNRNPM	Heterogeneous nuclear ribonucleoprotein M	10296.1	9616.67	10681.9	11206.6	10495.7	8299.77	10870.3	8583
P52292	P52292	IMA1_HUMAN	KPNA2	Importin subunit alpha-1	5017.38	3257.75	5044.74	3882.31	5780.28	3232.27	4746.62	4876.64
P52294	P52294	IMA5_HUMAN	KPNA1	Importin subunit alpha-5	99.1439	415.532	755.115	417.773		368.657	404.181	496.28
P52298	P52298;P52298-2	NCBP2_HUMAN	NCBP2	Nuclear cap-binding protein subunit 2	2988.72	4380.9	3029.66	2582.15	4253.02	2236.14	3048.3	2092.4
P52434	P52434;P52434-3	RPAB3_HUMAN	POLR2H	DNA-directed RNA polymerases I, II, and III subunit RPABC3	8565.7	10673.2	10756.6	8270	10657.2	8384.78	9630.24	8289.3
P52564	P46734;P52564;P46734-2;P46734-3;P52564-2	MP2K6_HUMAN	MAP2K6	Dual specificity mitogen-activated protein kinase kinase 6	1069.63	1325.27	1182.24	1076.88	1253.8	1189.2	914.262	1301.3
P52565	P52565;P52565-2	GDIR1_HUMAN	ARHGDIA	Rho GDP-dissociation inhibitor 1	27879.2	32290.9	23690.1	30237.1	28376.3	30832.6	27510.1	28234.9
P52594;P52594-2;P52594-3;P52594-4	P52594;P52594-2;P52594-3;P52594-4	AGFG1_HUMAN	AGFG1	Arf-GAP domain and FG repeat-containing protein 1			561.521		368.248	673.091	201.618
P52597	P52597	HNRPF_HUMAN	HNRNPF	Heterogeneous nuclear ribonucleoprotein F	6884.93	6800.27	6394.68	5688.24	4624.2	4731.45	5445.54	6143.89
P52701	P52701;P52701-2;P52701-3;P52701-4	MSH6_HUMAN	MSH6	DNA mismatch repair protein Msh6	8832.44	7574.45	9848.19	8428.38	8174.63	8920.51	9642.96	8535.82
P52732	P52732	KIF11_HUMAN	KIF11	Kinesin-like protein KIF11	1553.51	2107.62	1665.1	2216.72	1199.41	1655.73	1177.19	1719.09
P52735;P52735-2;P52735-3	P52735;P52735-2;P52735-3	VAV2_HUMAN	VAV2	Guanine nucleotide exchange factor VAV2	1474.25	1899.38	1505.09	1992.59	1690.35	2175.38	2238.06	2005.86
P52758	P52758	RIDA_HUMAN	RIDA	2-iminobutanoate/2-iminopropanoate deaminase	925.594		1192.04	521.415	634.047	811.027	741.121	647.086
P52788;P52788-2	P52788;P52788-2	SPSY_HUMAN	SMS	Spermine synthase	1196.41	1624.85	1703.74	1139.55	1512.09	1767.73	1613.64	2152.57
P52789	P52789	HXK2_HUMAN	HK2	Hexokinase-2	1020.18	1289.08	1734.45	1601.59	1116.73	919.558	1580.42	980.782
P52815	P52815	RM12_HUMAN	MRPL12	Large ribosomal subunit protein bL12m	695.984	2727.83	1217.59	1825.75	1227.64		720.126
P52888	P52888	THOP1_HUMAN	THOP1	Thimet oligopeptidase	4464.46	3819.25	4497.77	4004.74	3242.57	4134.09	4201.88	4552.33
P52895	P52895	AK1C2_HUMAN	AKR1C2	Aldo-keto reductase family 1 member C2	1097.35	1434.12	1484.74	1438.82	1135.86	1257.17	1566.76	1912.75
P52907	P47755;P52907;P47755-2	CAZA1_HUMAN	CAPZA1	F-actin-capping protein subunit alpha-1	30948.6	29317.5	24896.4	32139.9	31786.9	33520.7	33944.8	31776.2
P53004	P53004	BIEA_HUMAN	BLVRA	Biliverdin reductase A	16765.5	18171.2	18341.2	19364.4	23584.7	20642.4	19311.3	18530.1
P53007	P53007	TXTP_HUMAN	SLC25A1	Tricarboxylate transport protein, mitochondrial	4006.61	5360.42	5390.15	5508.06	4838.03	5016.78	6387.96	5779.25
P53041	P53041	PPP5_HUMAN	PPP5C	Serine/threonine-protein phosphatase 5	3984.93	4734.5	4094.42	4259.39	3782.98	3930.57	4309.6	4259.91
P53350	P53350	PLK1_HUMAN	PLK1	Serine/threonine-protein kinase PLK1	828.536	1045.26	947.203	649.048	1102.93	725.213	793.38	559.66
P53396;P53396-2	P53396;P53396-2	ACLY_HUMAN	ACLY	ATP-citrate synthase	33160.5	33772.9	33438.2	31874.6	32053.8	31628.1	33880.4	31611.3
P53582	P53582	MAP11_HUMAN	METAP1	Methionine aminopeptidase 1	2425.28	3280.61	2787.87	2931.98	3877.86	4019.63	2826.99	2780.26
P53597	P53597	SUCA_HUMAN	SUCLG1	Succinate--CoA ligase [ADP/GDP-forming] subunit alpha, mitochondrial	2922.48	4086.25	3350.79	4867.34	4621.21	4346.65	4648.09	5105.14
P53602	P53602	MVD1_HUMAN	MVD	Diphosphomevalonate decarboxylase	8055.61	10484.2	8112.09	9605.17	10361.1	7230.48	9709.36	7543.89
P53611	P53611	PGTB2_HUMAN	RABGGTB	Geranylgeranyl transferase type-2 subunit beta	3192.22	2840.5	3020.25	1779.52	1449.96	2522.12	2071.51	2630.18
P53618	P53618	COPB_HUMAN	COPB1	Coatomer subunit beta	9568.91	11169.9	11210.3	12210.3	11947.3	11845.9	10567.7	12541.7
P53621;P53621-2	P53621;P53621-2	COPA_HUMAN	COPA	Coatomer subunit alpha	15657.1	15875.4	17351	15647.8	17776	16763.1	17929.2	16189.1
P53680	P53680;P53680-2	AP2S1_HUMAN	AP2S1	AP-2 complex subunit sigma	3638.09	4818.98	4038.59	5533.36	4856.62	3985.36	4418.78	4456.59
P53805	P53805	RCAN1_HUMAN	RCAN1	Calcipressin-1			350.447					858.612
P53985;P53985-2	P53985;P53985-2	MOT1_HUMAN	SLC16A1	Monocarboxylate transporter 1	1870.82	2410.74	1412.76	1392.72	1757.9	2427.66	1900.59	1935.02
P53992	P53992	SC24C_HUMAN	SEC24C	Protein transport protein Sec24C	6778.52	6581.55	6877.66	6404.82	6387.85	6518.75	6005.21	6429.56
P53999	P53999	TCP4_HUMAN	SUB1	Activated RNA polymerase II transcriptional coactivator p15	3224.43	3335.87	3077.53	2642.79	2341.56	2535.49	2359.93	1960.45
P54098	P54098	DPOG1_HUMAN	POLG	DNA polymerase subunit gamma-1			1052.75			772.543
P54105	P54105	ICLN_HUMAN	CLNS1A	Methylosome subunit pICln	2081.99	3379.86	2185.02	3435.24	1552.99	1481.53	1995.09	1811.82
P54136	P54136;P54136-2	SYRC_HUMAN	RARS1	Arginine--tRNA ligase, cytoplasmic	18969.8	16095.5	21248.6	18077.5	18805.8	14886.5	19624.2	17929.3
P54252;P54252-1;P54252-3;P54252-4;P54252-5	P54252;P54252-1;P54252-3;P54252-4;P54252-5	ATX3_HUMAN	ATXN3	Ataxin-3	1140.74	844.525	1155.13	864.643	2208.83	2135.22	2551.25	1567.26
P54577	P54577	SYYC_HUMAN	YARS1	Tyrosine--tRNA ligase, cytoplasmic	6205.41	6141.57	5877.52	6239.78	6390.52	5962.86	5714.04	6921.51
P54578;P54578-2	P54578;P54578-2;P54578-3	UBP14_HUMAN	USP14	Ubiquitin carboxyl-terminal hydrolase 14	14275.2	15601.6	13446.4	18567.9	296130	308679	252314	289241
P54619;P54619-2;P54619-3	P54619;P54619-2;P54619-3	AAKG1_HUMAN	PRKAG1	5'-AMP-activated protein kinase subunit gamma-1	2648.11	2461.44	2951.48	2393.55	2633.35	2551.17	2289	2290.58
P54652	P54652	HSP72_HUMAN	HSPA2	Heat shock-related 70 kDa protein 2	2885.92	2087.65	2218.1	2430.51	1489.25	1996.39	2320.77	2294.3
P54709	P54709	AT1B3_HUMAN	ATP1B3	Sodium/potassium-transporting ATPase subunit beta-3	2524.18	3613.4	2565.08	3374.79	2386.54	2547.1	2494.95	3061.94
P54727	P54727	RD23B_HUMAN	RAD23B	UV excision repair protein RAD23 homolog B		1258.29	495.558	928.318		739.972	455.583	399.813
P54753	P54753;P54762;P54764;Q9UF33;P54762-5;P54764-2	EPHB3_HUMAN	EPHB3	Ephrin type-B receptor 3	2495.01	2836.03	2917.31	2699.78	2556.64	2340.67	2568.49	2497.12
P54760	P29322;P54756;P54760;P54756-2;P54756-3	EPHB4_HUMAN	EPHB4	Ephrin type-B receptor 4	4586.43	4171.12	3861.55	4093.45	4035.16	3810.86	4065.96	3898.15
P54819;P54819-2;P54819-5;P54819-6	P54819;P54819-2;P54819-3;P54819-4;P54819-5;P54819-6	KAD2_HUMAN	AK2	Adenylate kinase 2, mitochondrial	1662.07	1491.91	1443.81	1542.86	1059.52	1398.43	1525.9	1376.7
P54886;P54886-2	P54886;P54886-2	P5CS_HUMAN	ALDH18A1	Delta-1-pyrroline-5-carboxylate synthase	7637.77	10393.7	11034.2	11442.6	10731.6	11822.2	10483.5	9545.41
P55010	P55010	IF5_HUMAN	EIF5	Eukaryotic translation initiation factor 5	1214.79	2480.1	2365.26	1621.73		1636.19	2429.25	1370.85
P55011;P55011-3	P55011;P55011-3	S12A2_HUMAN	SLC12A2	Solute carrier family 12 member 2	492.385	550.904	813.181	502.063			1027.42	683.273
P55036	P55036;P55036-2	PSMD4_HUMAN	PSMD4	26S proteasome non-ATPase regulatory subunit 4	3209	2444.72	2587.03	3129.28	2173.38	2188.54	3073.38	2115.21
P55039	P55039	DRG2_HUMAN	DRG2	Developmentally-regulated GTP-binding protein 2	5311.06	4825.42	4676.78	4800.51	6127.29	5163.24	6424.14	4988.28
P55060;P55060-3	P55060;P55060-3;P55060-4	XPO2_HUMAN	CSE1L	Exportin-2	10506.7	8842.17	11588.6	9675.85	14029.7	7542.11	12599.4	9129.96
P55061;P55061-2	P55061;P55061-2	BI1_HUMAN	TMBIM6	Bax inhibitor 1	990.486		971.404	896.005	1306.14	1503.76	1221.17	1494.32
P55072	P55072	TERA_HUMAN	VCP	Transitional endoplasmic reticulum ATPase	37052.8	31206.9	33880.2	34773.1	28376.5	30001.7	34248.9	33517.3
P55084;P55084-2	P55084;P55084-2	ECHB_HUMAN	HADHB	Trifunctional enzyme subunit beta, mitochondrial	7266.6	7117.87	7324.04	6001.57	6169.82	7534.71	6695.64	7668.34
P55209-3	P55209-3	NP1L1_HUMAN	NAP1L1	Isoform 3 of Nucleosome assembly protein 1-like 1	170.389	784.509		330.201		766.138	353.323
P55209;P55209-2	P55209;P55209-2	NP1L1_HUMAN	NAP1L1	Nucleosome assembly protein 1-like 1	2659.02	3860.85	2117.2	3010.81	2386.9	2435.42	2763.36	2504.85
P55210;P55210-3	P55210;P55210-3;P55210-4	CASP7_HUMAN	CASP7	Caspase-7	2041.6	1349.93	2862.79	2126.19	1495.29	2198.48	2459.19	2085.99
P55212	P55212;P55212-2	CASP6_HUMAN	CASP6	Caspase-6	7949.93	11336.3	9283.89	10057.5	9537.7	10601.6	10325.2	9195.99
P55263;P55263-2;P55263-3	P55263;P55263-2;P55263-3;P55263-4	ADK_HUMAN	ADK	Adenosine kinase	5609.53	4727.68	4809.31	4372.93	4878.45	5518.98	4907.55	6275.7
P55265;P55265-4;P55265-5	P55265;P55265-2;P55265-3;P55265-4;P55265-5	DSRAD_HUMAN	ADAR	Double-stranded RNA-specific adenosine deaminase	2099.97	2268.84	2364.85	2835.93	2353.62	2430.24	2372.02	2401.78
P55327;P55327-2;P55327-3;P55327-4;P55327-5;P55327-6;P55327-7	P55327;P55327-2;P55327-3;P55327-4;P55327-5;P55327-6;P55327-7	TPD52_HUMAN	TPD52	Tumor protein D52		1906.95		1075.68
P55735;P55735-2;P55735-3;P55735-4	P55735;P55735-3;P55735-2;P55735-4	SEC13_HUMAN	SEC13	Protein SEC13 homolog	9754.37	11608.6	9792.33	10951.1	10150.7	10729	10178.4	9681.72
P55769	P55769	NH2L1_HUMAN	SNU13	NHP2-like protein 1	1412.03	985.334	1326.56	1032.84	714.592	873.237	1338.94	1277.67
P55786	P55786;P55786-2	PSA_HUMAN	NPEPPS	Puromycin-sensitive aminopeptidase	16178.5	15366.8	17209.4	15891.5	15412.3	15031.3	16724.2	15497.7
P55795	P55795	HNRH2_HUMAN	HNRNPH2	Heterogeneous nuclear ribonucleoprotein H2	8081.52	6019.34	6633	6295.69	6991.54	7115.19	8561.74	5903.48
P55809	P55809;Q9BYC2;P55809-2	SCOT1_HUMAN	OXCT1	Succinyl-CoA:3-ketoacid coenzyme A transferase 1, mitochondrial	446.626				635.13	928.94	798.81	1008.04
P55854;P55854-2;P61956;P61956-2;Q6EEV6	P55854;P61956;Q6EEV6;P55854-2;P61956-2	SUMO2_HUMAN;SUMO3_HUMAN;SUMO4_HUMAN	SUMO2;SUMO3;SUMO4	Small ubiquitin-related modifier 3	1762.28	4245.58	1844.63	4383.83		1370.41	1422.97	1092.1
P55884;P55884-2	P55884;P55884-2	EIF3B_HUMAN	EIF3B	Eukaryotic translation initiation factor 3 subunit B	26897.8	27165	27665.5	29303.9	26078.4	29238.7	28615.7	28897.7
P56134;P56134-2;P56134-3;P56134-4	P56134;P56134-2;P56134-3;P56134-4	ATPK_HUMAN	ATP5MF	ATP synthase subunit f, mitochondrial	1853.26	2208.89	1492.61	2904.31	2574.77	2327.75	1798.22	2654.6
P56159-2	P56159-2	GFRA1_HUMAN	GFRA1	Isoform 2 of GDNF family receptor alpha-1	3689.99	3371.24	3668.71	2668.63	4039.96	2980.05	3470.34	2825.79
P56192	P56192;P56192-2	SYMC_HUMAN	MARS1	Methionine--tRNA ligase, cytoplasmic	12115.4	11435	11530.4	11024.1	11620.3	10351.3	10576.8	11212.9
P56282;P56282-2;P56282-3	P56282;P56282-2;P56282-3	DPOE2_HUMAN	POLE2	DNA polymerase epsilon subunit 2	1760.19	1472.35	2190.34	1095.6	1437.72	993.912	1197.14	1572.02
P56537	P56537	IF6_HUMAN	EIF6	Eukaryotic translation initiation factor 6	10707.9	12779.3	13699.9	11236.7	12574.9	11678.4	12104.5	9094.17
P56545;P56545-2;P56545-3	P56545;P56545-3;P56545-2	CTBP2_HUMAN	CTBP2	C-terminal-binding protein 2	9413.8	9762.37	8694.98	8881.27	10261.8	10080.2	10172.2	8300.52
P56937;P56937-2;P56937-3	P56937;P56937-3;P56937-2	DHB7_HUMAN	HSD17B7	3-keto-steroid reductase/17-beta-hydroxysteroid dehydrogenase 7		1054.96	638.418	676.004		1055.21	671.299	481.686
P56945;P56945-2;P56945-3;P56945-5;P56945-6;P56945-7;P56945-8	P56945;P56945-2;P56945-3;P56945-4;P56945-5;P56945-6;P56945-7;P56945-8	BCAR1_HUMAN	BCAR1	Breast cancer anti-estrogen resistance protein 1	8247.54	15190.6	8823.32	13106.5	3470.73	3293.19	2250.57	2201.02
P57081;P57081-2	P57081;P57081-2	WDR4_HUMAN	WDR4	tRNA (guanine-N(7)-)-methyltransferase non-catalytic subunit WDR4	2734.74	2438.33	2100.95	2821.87	2447.65	3405.9	3002.1	3533.93
P57088	P57088	TMM33_HUMAN	TMEM33	Transmembrane protein 33	4549.67	6937.6	9274.91	7377.05	11212.1	11686.9	10103.4	7360.02
P57678	P57678	GEMI4_HUMAN	GEMIN4	Gem-associated protein 4	2712.67	2653.16	2499.22	2416.12	3164.34	2527.29	2820.54	3454.95
P57735	P57735	RAB25_HUMAN	RAB25	Ras-related protein Rab-25	7069.29	8011.63	6776.4	7551.94	7641.26	9546.01	7516.44	6234.93
P57772	P57772;P57772-2	SELB_HUMAN	EEFSEC	Selenocysteine-specific elongation factor	1105.08	1953.49	1618.01	1378.09	1623.19	1578.91	1350.27	1626.83
P58107	P58107	EPIPL_HUMAN	EPPK1	Epiplakin	4930.87	4161.55	4605.01	4348.09	4786.32	3541.1	4701.04	4128.56
P59998;P59998-2;P59998-3	P59998;P59998-2;P59998-3	ARPC4_HUMAN	ARPC4	Actin-related protein 2/3 complex subunit 4	23498	25430	25718.3	23394.4	27106.1	24437.4	27762.4	22862.8
P60174;P60174-3	P60174;P60174-3;P60174-4	TPIS_HUMAN	TPI1	Triosephosphate isomerase	29995.9	34980.9	30575	32251.2	22111.7	26001.4	28159.6	32478.3
P60228	P60228	EIF3E_HUMAN	EIF3E	Eukaryotic translation initiation factor 3 subunit E	2391.76	2210.67	1746.48	1964.66	2646.57	1689.03	2675.42	2534.87
P60510	P60510	PP4C_HUMAN	PPP4C	Serine/threonine-protein phosphatase 4 catalytic subunit	6405.55	6282.86	4735.57	4930.76	5898.1	6722.46	6027.6	6007.71
P60660;P60660-2	P14649;P60660;P60660-2	MYL6_HUMAN	MYL6	Myosin light polypeptide 6	912.393	2896.48	1112.34	1397.86	714.445	1679.97	1050.38	1040.31
P60709;P63261	P60709;P62736;P63261;P63267;P68032;Q562R1;P63267-2	ACTB_HUMAN;ACTG_HUMAN	ACTB;ACTG1	Actin, cytoplasmic 1	223823	215402	230372	229084	193184	184505	210939	197802
P60763	P60763	RAC3_HUMAN	RAC3	Ras-related C3 botulinum toxin substrate 3	1333.48	2222.1	363.182	1151.19	1241.05	1920.55	1643.38	1543.38
P60842	P60842;P60842-2	IF4A1_HUMAN	EIF4A1	Eukaryotic initiation factor 4A-I	141105	149771	154051	163169	154302	160859	158131	166428
P60866;P60866-2	P60866;P60866-2	RS20_HUMAN	RPS20	Small ribosomal subunit protein uS10	12631	12827.3	13045.2	12223.6	14449.1	12262.1	15286.9	12640.7
P60900	P60900;P60900-2;P60900-3	PSA6_HUMAN	PSMA6	Proteasome subunit alpha type-6	9629.43	10317.1	8061.84	10497.9	9948.87	11417.6	8493.68	14039.6
P60953	P60953	CDC42_HUMAN	CDC42	Cell division control protein 42 homolog	2638.81	2532.56	2805.43	3323.73	2115.93	3291.77	2142.42	2891.04
P60981;P60981-2	P60981;P60981-2	DEST_HUMAN	DSTN	Destrin	24322	23369.1	25258.6	22815.6	25170.6	21281.3	25160	21089.6
P60983	P60983	GMFB_HUMAN	GMFB	Glia maturation factor beta	1230.6	1045.82	838.793	952.733	733.501	1178.3	1215.11	1180.17
P61006	P61006;P61006-2	RAB8A_HUMAN	RAB8A	Ras-related protein Rab-8A	976.28	551.234	752.876	608.38	756.339	619.806	820.196	702.052
P61009	P61009	SPCS3_HUMAN	SPCS3	Signal peptidase complex subunit 3	5029.6	5682.27	4517.21	5554.48	6426.38	5396.91	4961.38	4944.89
P61011;P61011-2	P61011;P61011-2	SRP54_HUMAN	SRP54	Signal recognition particle subunit SRP54	2458.96	2241.6	2370.5	2369.53	3214.89	1888.36	2418.39	1502.76
P61018;P61018-2	P20338;P61018;P61018-2	RAB4B_HUMAN	RAB4B	Ras-related protein Rab-4B	732.168	1772.18	1218.88	928.456		1424.37	894.223	1199.7
P61019	P61019;Q8WUD1	RAB2A_HUMAN	RAB2A	Ras-related protein Rab-2A	13795.6	19489.3	15199.6	18822.7	17881.5	18402	16182.2	18702.5
P61020;P61020-2	P61020;P61020-2	RAB5B_HUMAN	RAB5B	Ras-related protein Rab-5B	710.328	836.068	870.603	885.962	801.468	1879.77	1275.9	1417.56
P61026	P61026	RAB10_HUMAN	RAB10	Ras-related protein Rab-10	4244.36	5220.02	5171.24	5678.68	5879.44	6445.1	6296.64	7120.44
P61077;P61077-2	P61077;P62837;P62837-2;P61077-2;P61077-3	UB2D3_HUMAN	UBE2D3	Ubiquitin-conjugating enzyme E2 D3	29613.3	32263	29931.8	37580.9	40641.3	34909	39282.3	30547.7
P61081	P61081	UBC12_HUMAN	UBE2M	NEDD8-conjugating enzyme Ubc12	11158.6	10862.6	10186.3	10582.6	11136.6	8507.52	10972.8	8095.51
P61086;P61086-3	P61086;P61086-3	UBE2K_HUMAN	UBE2K	Ubiquitin-conjugating enzyme E2 K	2302.83	868.438	1951.96	2006.01	1904.07	1285.81	1960.75	1485.33
P61088	P61088;Q5JXB2	UBE2N_HUMAN	UBE2N	Ubiquitin-conjugating enzyme E2 N	5904.49	6363.99	5148.31	5403.1	4463.59	4974.65	4595.31	5596.95
P61106	P61106	RAB14_HUMAN	RAB14	Ras-related protein Rab-14	9523.92	12514.2	9559.57	11509.1	12094.5	13363.3	10684.1	13253.8
P61158	P61158	ARP3_HUMAN	ACTR3	Actin-related protein 3	10765.4	9566.65	10706.4	10968.7	10568.7	10735.7	10904.7	10818.9
P61160	P61160;P61160-2	ARP2_HUMAN	ACTR2	Actin-related protein 2	12321.8	16116.7	15280.3	14673.2	13706.7	14634.2	14689.3	15302.8
P61163	P42025;P61163	ACTZ_HUMAN	ACTR1A	Alpha-centractin	1938.26	2155.34	1780.86	2121.98	1793.74	2155.11	1582.04	2039.75
P61201;P61201-2	P61201;P61201-2	CSN2_HUMAN	COPS2	COP9 signalosome complex subunit 2	1914.6	1329.91	1967.26	1386.38	2267.51	1525.87	2112.3	2312.32
P61204;P84077	P61204;P84077;P61204-2	ARF1_HUMAN;ARF3_HUMAN	ARF1;ARF3	ADP-ribosylation factor 3	22329.2	27621.2	23903.5	30913.4	25920.5	31494.7	23984.5	28733.2
P61221	P61221	ABCE1_HUMAN	ABCE1	ATP-binding cassette sub-family E member 1	10743.3	9676.19	10020.1	9698.71	12151.2	10665.9	11714.1	9192.96
P61225	P10114;P61225;Q9Y3L5	RAP2B_HUMAN	RAP2B	Ras-related protein Rap-2b	1881.11	1779.88	1619.4	1419.52	1288.25	1617.81	1631.26	1660.63
P61247	P61247	RS3A_HUMAN	RPS3A	Small ribosomal subunit protein eS1	9721.5	12485.9	16658	13111	14808.9	14830.2	13748.7	12346.5
P61254	P61254;Q9UNX3	RL26_HUMAN	RPL26	Large ribosomal subunit protein uL24	33776.9	42839	62279.8	54536.8	52009.1	65830.3	51319.2	61802
P61289;P61289-2;P61289-3	P61289;P61289-2;P61289-3	PSME3_HUMAN	PSME3	Proteasome activator complex subunit 3	1243.2	1122.15	848.884	763.997	1343.86	847.754	1267.83	1379.49
P61313	P61313	RL15_HUMAN	RPL15	Large ribosomal subunit protein eL15	2476.55	2385.81	1914.47	2923.59	2378	2898	2673.39	2158.55
P61326;P61326-2;Q96A72	P61326;Q96A72;P61326-2	MGN2_HUMAN;MGN_HUMAN	MAGOH;MAGOHB	Protein mago nashi homolog	3092.48	3635.12	2279.96	2939.48	4055.03	4671.91	4175.46	3425.34
P61353	P61353	RL27_HUMAN	RPL27	Large ribosomal subunit protein eL27	39748.4	58355.2	56374.9	55888.7	57812.8	61093.4	53181.1	51120.6
P61421	P61421	VA0D1_HUMAN	ATP6V0D1	V-type proton ATPase subunit d 1	2432.63	3757.53	3047.99	3164.83	3400.19	2527.89	3972.88	3084.62
P61457	P61457	PHS_HUMAN	PCBD1	Pterin-4-alpha-carbinolamine dehydratase	2096.33	1744.38	2419.52	2908.79	2020.85	4006.02	2509.26	3289.09
P61513	P61513	RL37A_HUMAN	RPL37A	Large ribosomal subunit protein eL43	8151.44	7799.21	10588.3	9058.4	9537.21	10484.9	10294	11915.9
P61586	P61586	RHOA_HUMAN	RHOA	Transforming protein RhoA	4713.73	6651.45	4348.59	5335.54	5117.56	5833.41	4989.36	7457.86
P61604	P61604	CH10_HUMAN	HSPE1	10 kDa heat shock protein, mitochondrial	8718.08	22152.5	8292.6	15595.9	8560.83	6142.61	8300.16	7563.25
P61619	P61619;Q9H9S3;Q9H9S3-2;Q9H9S3-3	S61A1_HUMAN	SEC61A1	Protein transport protein Sec61 subunit alpha isoform 1	3012.47	3387.16	3103.26	3725.04	4369.37	3350.65	3558.57	3525.97
P61626	P61626	LYSC_HUMAN	LYZ	Lysozyme C		18790.2		644.141		1129.88
P61758;P61758-2	P61758;P61758-2	PFD3_HUMAN	VBP1	Prefoldin subunit 3	4048.66	4684.89	3725.7	3460.53	3073.42	2893.08	3600.44	3179.74
P61803	P61803	DAD1_HUMAN	DAD1	Dolichyl-diphosphooligosaccharide--protein glycosyltransferase subunit DAD1	2622.07	3130.97	1893.74	2990.75	2004.45	3538.58	2096.26	4004.2
P61923;P61923-4	P61923;P61923-4;P61923-5	COPZ1_HUMAN	COPZ1	Coatomer subunit zeta-1	3913.76	3220.03	3749.5	2891.42	3091.93	3959.91	3169.43	3357.44
P61960	P61960	UFM1_HUMAN	UFM1	Ubiquitin-fold modifier 1	2161	2110.15	1955.61	1909.93	2460.81	1232.95	1583.77	1351.84
P61962	P61962	DCAF7_HUMAN	DCAF7	DDB1- and CUL4-associated factor 7	2691.07	4397.57	3980.83	3784.15	3006.33	4271.55	3662.94	4487.24
P61964	P61964	WDR5_HUMAN	WDR5	WD repeat-containing protein 5					1182.71		498.394
P61966	P61966;P61966-2	AP1S1_HUMAN	AP1S1	AP-1 complex subunit sigma-1A	6288.48	8125.29	7856.66	8946.89	9531.49	9315.32	9952.45	9190.08
P61970	P61970	NTF2_HUMAN	NUTF2	Nuclear transport factor 2	3280.21	4015.82	2762.03	3545.89	2986.2	3675.36	3065.77	4157
P61978-3	P61978;P61978-2;P61978-3	HNRPK_HUMAN	HNRNPK	Isoform 3 of Heterogeneous nuclear ribonucleoprotein K	15531.9	13512.8	13386.4	14272.7	13645.2	10276.2	14318.8	12467.4
P61981	P61981	1433G_HUMAN	YWHAG	14-3-3 protein gamma	7422.24	12377.8	8352.67	9835.33	9579.88	9612.29	9280.1	9950.78
P62068;P62068-4	O75317;P62068;P62068-2;P62068-3;P62068-4	UBP46_HUMAN	USP46	Ubiquitin carboxyl-terminal hydrolase 46	1331.71	2767.43	1623.64	2315.01	34040.6	34281.3	27904.5	29245.4
P62081	P62081	RS7_HUMAN	RPS7	Small ribosomal subunit protein eS7	34980.9	50442.8	52796.8	49677.8	43739.8	42414.5	47783.4	44139.8
P62136	P36873;P62136;P62140;P36873-2;P62136-2;P62136-3	PP1A_HUMAN	PPP1CA	Serine/threonine-protein phosphatase PP1-alpha catalytic subunit	6356.3	6008.12	5965.65	6560.69	5535.21	6361.99	5600.93	7276.06
P62140	P62140	PP1B_HUMAN	PPP1CB	Serine/threonine-protein phosphatase PP1-beta catalytic subunit	4578.61	4568.56	3806.5	4721.16	5283.62	4186.61	5094.19	6616.78
P62191	P62191;P62191-2	PRS4_HUMAN	PSMC1	26S proteasome regulatory subunit 4	11489.1	10677.9	15166.6	10426.7	12224.7	7990.25	13675.5	10003.5
P62195;P62195-2	P62195;P62195-2	PRS8_HUMAN	PSMC5	26S proteasome regulatory subunit 8	19196	14940.5	19004.5	13310.4	14082.6	13646.8	13507.3	16065.3
P62241	P62241	RS8_HUMAN	RPS8	Small ribosomal subunit protein eS8	23445.3	38633.8	40402.6	45245.8	48254.4	49072.2	45089.5	37385.1
P62244	P62244	RS15A_HUMAN	RPS15A	Small ribosomal subunit protein uS8	66655.9	123567	100004	117859	102598	119608	99418.5	114290
P62249	P62249	RS16_HUMAN	RPS16	Small ribosomal subunit protein uS9	32229.8	26313.7	51453.9	32391.6	44934.1	32983.4	42539.6	29733.5
P62258	P62258;P62258-2	1433E_HUMAN	YWHAE	14-3-3 protein epsilon	4907.71	8068.67	5232.68	6631.75	5430.41	4134.38	4703.72	5968.85
P62263	P62263	RS14_HUMAN	RPS14	Small ribosomal subunit protein uS11	10689.5	7801.69	11616.3	10605.5	11284	9804.82	13207.2	9226.69
P62266	P62266	RS23_HUMAN	RPS23	Small ribosomal subunit protein uS12	8682.68	11049.8	13750.5	12951.7	14719.3	15098	13336.9	12551.2
P62269	P62269	RS18_HUMAN	RPS18	Small ribosomal subunit protein uS13	14039.6	35733.8	35281.5	33259.8	34530.6	28517.2	33406.2	23361.2
P62273;P62273-2	P62273;P62273-2	RS29_HUMAN	RPS29	Small ribosomal subunit protein uS14	2090.26	2206.81	2443.58	1233.81	2054.39	1610.22	1888.61	979.492
P62277	P62277	RS13_HUMAN	RPS13	Small ribosomal subunit protein uS15	34724.1	63651	53929.8	55303.2	46701.7	52762.2	45188.4	47696.2
P62280	P62280	RS11_HUMAN	RPS11	Small ribosomal subunit protein uS17	55973.3	69220.6	68116.6	68984.9	72935.2	82171.3	77591	73217.5
P62304	P62304	RUXE_HUMAN	SNRPE	Small nuclear ribonucleoprotein E	3998.81	6699.61	6022.01	7088.1	5217.81	7322.85	6012.13	8495.3
P62306	P62306	RUXF_HUMAN	SNRPF	Small nuclear ribonucleoprotein F	4532.17	5058.28	5094.5	5646.8	5329.75	4611.75	4476.4	5915.68
P62314	P62314	SMD1_HUMAN	SNRPD1	Small nuclear ribonucleoprotein Sm D1		1525.64	1396.16	1825.63	987.576	1333.13	1022.04	1455.74
P62316;P62316-2	P62316;P62316-2	SMD2_HUMAN	SNRPD2	Small nuclear ribonucleoprotein Sm D2	5334.85	4779.89	6211.03	6132.41	5125.87	6165.85	5909.53	4767.81
P62318;P62318-2	P62318;P62318-2	SMD3_HUMAN	SNRPD3	Small nuclear ribonucleoprotein Sm D3	24453.5	28494.7	23152.3	27504.2	23163.7	29167.8	28426.2	28401.7
P62330	P62330	ARF6_HUMAN	ARF6	ADP-ribosylation factor 6	10716.6	15911.1	11671.9	12649.1	13164	13734.6	12391.3	12773
P62333	P62333	PRS10_HUMAN	PSMC6	26S proteasome regulatory subunit 10B	5196.87	4152.2	4221.94	4060.4	4532.81	3259.49	4905.37	3445.81
P62380	P62380	TBPL1_HUMAN	TBPL1	TATA box-binding protein-like 1	510.528	235.709	145.23	91.5099	165.311			168.869
P62424	P62424	RL7A_HUMAN	RPL7A	Large ribosomal subunit protein eL8	4991.21	8104.43	11758.3	8020.92	8980.67	11588.2	10445.6	7978.99
P62487	P62487	RPB7_HUMAN	POLR2G	DNA-directed RNA polymerase II subunit RPB7	1606.3	1319.82	1100.23	1750.64	2136.55	1724.45	1710.21	1592.86
P62495;P62495-2	P62495;P62495-2	ERF1_HUMAN	ETF1	Eukaryotic peptide chain release factor subunit 1	20035.3	18221.7	21438.7	21435.7	20925.2	19056.1	18320.2	20680.6
P62633;P62633-2;P62633-4;P62633-5;P62633-6;P62633-8	P62633;P62633-2;P62633-4;P62633-5;P62633-6;P62633-8	CNBP_HUMAN	CNBP	CCHC-type zinc finger nucleic acid binding protein		1295.57		828.466
P62701	P62701;P22090;Q8TD47	RS4X_HUMAN	RPS4X	Small ribosomal subunit protein eS4, X isoform	32875.8	37098.1	37848.2	38071.6	34461.6	36959.1	36806.3	33352.4
P62736;P63267	P62736;P63267;P68032;P68133	ACTA_HUMAN;ACTH_HUMAN	ACTA2;ACTG2	Actin, aortic smooth muscle	20645.7	22888.6	20734.7	20262.1	23126.7	22117.1	18399.2	33089.9
P62750	P62750	RL23A_HUMAN	RPL23A	Large ribosomal subunit protein uL23	40607.7	47917.9	67551.8	57993.1	55717.3	55429.6	63994.1	40035.7
P62753	P62753	RS6_HUMAN	RPS6	Small ribosomal subunit protein eS6	19498.8	25341.5	29131.1	22477.4	26269.8	33856.8	29139.6	24394.1
P62805	P62805	H4_HUMAN	H4C1	Histone H4	2286.23	4063.63	3673.9	5307.66	5363.12	4180.19	3308.17	2924.94
P62820	P62820;Q9H0U4;Q92928;P62820-2	RAB1A_HUMAN	RAB1A	Ras-related protein Rab-1A	100066	123920	96606.8	104152	111956	125835	107230	122885
P62826	P62826	RAN_HUMAN	RAN	GTP-binding nuclear protein Ran	111539	138191	127470	136278	139822	127119	138024	148656
P62829	P62829	RL23_HUMAN	RPL23	Large ribosomal subunit protein uL14	21792.3	19879.7	21521.2	21401.1	18754.7	23079.4	20751.7	20856.4
P62834	P61224;P62834;P61224-2;P61224-3	RAP1A_HUMAN	RAP1A	Ras-related protein Rap-1A	9943.22	12938	8919.43	14354	12484.3	13614.6	10131.3	13592.6
P62841	P62841	RS15_HUMAN	RPS15	Small ribosomal subunit protein uS19	2503.34	3364.1	3213.07	3796.88	3552.87	3516.15	3284.58	3164.9
P62847;P62847-2;P62847-3;P62847-4	P62847;P62847-2;P62847-3;P62847-4	RS24_HUMAN	RPS24	Small ribosomal subunit protein eS24	4035.94	4666.28	5644.42	5799.25	7285.46	5902.11	6731.28	5883.52
P62851	P62851	RS25_HUMAN	RPS25	Small ribosomal subunit protein eS25	3102.38	4449.39	7454.17	4828.36	5144.43	2853.95	5152.7	1350.49
P62854	P62854;Q5JNZ5	RS26_HUMAN	RPS26	Small ribosomal subunit protein eS26	5797.8	10520.2	7814.99	10231.8	10304.2	11355.2	8904.55	6898.11
P62857	P62857	RS28_HUMAN	RPS28	Small ribosomal subunit protein eS28	42721.3	38183.7	53306.8	36204.6	44865.8	24809.3	40407.5	22768.2
P62861	P62861	RS30_HUMAN	FAU	Ubiquitin-like FUBI-ribosomal protein eS30 fusion protein	11205.9	11376.3	14728.4	13759	14682.1	14957.5	12466.2	7651.29
P62873	P62873;P62873-2	GBB1_HUMAN	GNB1	Guanine nucleotide-binding protein G(I)/G(S)/G(T) subunit beta-1	15694.9	22227.2	21104.8	19226.2	21233.2	23882.8	23254.6	11799.2
P62879	P62873;P62879;P62879-2	GBB2_HUMAN	GNB2	Guanine nucleotide-binding protein G(I)/G(S)/G(T) subunit beta-2	26330.6	31538.2	29162.9	31533.8	38856.4	35656.3	39264.8	35617.8
P62888	P62888	RL30_HUMAN	RPL30	Large ribosomal subunit protein eL30	62524.3	57927.4	64729.8	53274.2	63608.9	55041.9	65835.5	50788.1
P62899;P62899-2;P62899-3	P62899;P62899-2;P62899-3	RL31_HUMAN	RPL31	Large ribosomal subunit protein eL31	9693.65	17027.8	20743.2	16102.9	17907.7	19542.8	16168.7	16329.7
P62906	P62906	RL10A_HUMAN	RPL10A	Large ribosomal subunit protein uL1	24309.6	24900.5	26766.5	25297.9	27942.4	21141.7	25673.7	21326.7
P62910	P62910	RL32_HUMAN	RPL32	Large ribosomal subunit protein eL32	542.489	1059.7	969.145	1062.51	1038.64	1102.04	468.576	443.324
P62913;P62913-2	P62913;P62913-2	RL11_HUMAN	RPL11	Large ribosomal subunit protein uL5	70246.4	102553	85361.4	95168.9	91414.1	86610.1	86924.6	82200.4
P62917	P62917	RL8_HUMAN	RPL8	Large ribosomal subunit protein uL2	2918.67	3195.31	5218.02	3444.58	5983.44	5633.61	5519.54	3861.99
P62937	P62937	PPIA_HUMAN	PPIA	Peptidyl-prolyl cis-trans isomerase A	102156	134162	94128.3	132589	101317	122713	113013	121801
P62979	P62979	RS27A_HUMAN	RPS27A	Ubiquitin-ribosomal protein eS31 fusion protein	25579.9	58115.2	128734	61765.2	608130	614564	474888	528710
P62995;P62995-3	P62995;P62995-3	TRA2B_HUMAN	TRA2B	Transformer-2 protein homolog beta	532.862	347.972		296.953		287.092	277.827	333.79
P63000;P63000-2	P15153;P60763;P63000;P63000-2	RAC1_HUMAN	RAC1	Ras-related C3 botulinum toxin substrate 1	7991.04	9098.45	7287.21	11254	10734	10657.1	9250.12	11552.6
P63010-3	P63010;P63010-2;P63010-3	AP2B1_HUMAN	AP2B1	Isoform 3 of AP-2 complex subunit beta	12751.7	9875.4	10690.4	9112.19	9402.45	9759.66	10464.6	9608.62
P63092;P63092-2;P63092-3;P63092-4;Q5JWF2;Q5JWF2-2	P63092;Q5JWF2;P63092-2;P63092-3;P63092-4;Q5JWF2-2	GNAS1_HUMAN;GNAS2_HUMAN	GNAS	Guanine nucleotide-binding protein G(s) subunit alpha isoforms short	32470	28479.4	32872.4	28899.5	34043.1	29921.1	30404.8	27123.5
P63104	P63104;P63104-2	1433Z_HUMAN	YWHAZ	14-3-3 protein zeta/delta	17450.7	23468.8	16467.4	22545.7	19765.8	13215	17508.8	15214.5
P63151;P63151-2	P63151;P63151-2	2ABA_HUMAN	PPP2R2A	Serine/threonine-protein phosphatase 2A 55 kDa regulatory subunit B alpha isoform	8446.26	9014.14	7892.15	9301.55	8359.31	9319.42	8980.66	8675.2
P63167	P63167;Q96FJ2	DYL1_HUMAN	DYNLL1	Dynein light chain 1, cytoplasmic	6920.93	7344.99	7269.77	6445.71	9829.25	7704.24	8878.96	6941.5
P63172	P63172	DYLT1_HUMAN	DYNLT1	Dynein light chain Tctex-type 1	2281.69	1999.73	2595.62	2422.71	2698.45	2880.63	2315.35	2775.57
P63220	P63220	RS21_HUMAN	RPS21	Small ribosomal subunit protein eS21	31242	36229.3	35187.3	30057	30130.9	28970.4	29100.3	26965.1
P63241;P63241-2;Q6IS14	P63241;Q6IS14;P63241-2	IF5A1_HUMAN;IF5AL_HUMAN	EIF5A;EIF5AL1	Eukaryotic translation initiation factor 5A-1	241.47	1992.74	1331.91	2839.87	706.998		1074.13	881.709
P63244	P63244	RACK1_HUMAN	RACK1	Small ribosomal subunit protein RACK1	94578.4	104191	90444.2	97345.7	99481.2	101024	91935.2	91959.4
P63279	P63279	UBC9_HUMAN	UBE2I	SUMO-conjugating enzyme UBC9		1579.08	825.57	1589.13		936.631		1238.69
P67775	P62714;P67775;P67775-2	PP2AA_HUMAN	PPP2CA	Serine/threonine-protein phosphatase 2A catalytic subunit alpha isoform	6654.11	6845.16	5403.93	6604.38	6069.61	6455.5	5757.62	7302.43
P67809	P16989;P67809;Q9Y2T7;P16989-2;P16989-3	YBOX1_HUMAN	YBX1	Y-box-binding protein 1	3433.19	4623.73	4475.78	4536.75	4127.79	4334.45	3500.03	4345.01
P67812;P67812-3;P67812-4	P67812;P67812-3;P67812-4	SC11A_HUMAN	SEC11A	Signal peptidase complex catalytic subunit SEC11A	2120.99	3680.26	2774.75	2386.8	3781.83	3444.49	3451.29	3103.2
P68104;Q5VTE0	P68104;Q5VTE0	EF1A1_HUMAN;EF1A3_HUMAN	EEF1A1;EEF1A1P5	Elongation factor 1-alpha 1	19562.9	10634.9	19883.9	16440	16024.9	10190.7	20731.7	6950.54
P68366;P68366-2	P68363;P68366;P68363-2;P68366-2	TBA4A_HUMAN	TUBA4A	Tubulin alpha-4A chain	118653	115024	96935.4	99329.8	102583	99426.8	108770	106694
P68371	P68371;Q13885;Q9BVA1	TBB4B_HUMAN	TUBB4B	Tubulin beta-4B chain	51887	49023.4	50735.4	47531.9	47889.3	42023.6	48532.5	43610.8
P68400	P68400;P68400-2	CSK21_HUMAN	CSNK2A1	Casein kinase II subunit alpha	4285.75	5698.96	5260.35	4713.33	4262.35	3849.28	4831.56	5187.46
P68402	P68402	PA1B2_HUMAN	PAFAH1B2	Platelet-activating factor acetylhydrolase IB subunit alpha2	3562.65	4689.92	6499.35	6613.55	4016.04	4462.91	4565.76	6585.95
P69849;Q15155;Q5JPE7;Q5JPE7-2	P69849;Q15155;Q5JPE7;Q5JPE7-2;Q5JPE7-3	NOMO1_HUMAN;NOMO2_HUMAN;NOMO3_HUMAN	NOMO1;NOMO2;NOMO3	BOS complex subunit NOMO3	2723.11	3119.55	2848.16	2821.9	3119.82	3134.02	3035.75	2980.72
P78330	P78330	SERB_HUMAN	PSPH	Phosphoserine phosphatase	1506.94	1088.47	1873.81	1185.1	1523.63	1831.78	2341.36	1012.91
P78344;P78344-2	P78344;P78344-2	IF4G2_HUMAN	EIF4G2	Eukaryotic translation initiation factor 4 gamma 2	975.199	621.404	693.684	265.412	684.209	336.511	995.058	536.359
P78346;P78346-2	P78346;P78346-2	RPP30_HUMAN	RPP30	Ribonuclease P protein subunit p30	5454.84	5112.61	4107.29	4605.06	5106.13	4999.92	5244.74	4758.66
P78347;P78347-2;P78347-3;P78347-4	P78347;P78347-2;P78347-3;P78347-4;P78347-5	GTF2I_HUMAN	GTF2I	General transcription factor II-I	9246.11	7960.05	9128.8	9116.69	8097.21	7575.13	9020.6	8819.99
P78371	P78371;P78371-2	TCPB_HUMAN	CCT2	T-complex protein 1 subunit beta	18727.1	14710.7	15728.1	13565.3	13558.8	12565	15918.1	14744.8
P78406	P78406	RAE1L_HUMAN	RAE1	mRNA export factor RAE1	2011.63	2808.96	1771.24	2628.05	1917.39	3215.98	2062.91	3004.27
P78417	P78417;P78417-3	GSTO1_HUMAN	GSTO1	Glutathione S-transferase omega-1	13696.5	9327.53	13685.5	12610.5	9194.95	10886.9	11663.8	11097.9
P78527	P78527;P78527-2	PRKDC_HUMAN	PRKDC	DNA-dependent protein kinase catalytic subunit	21985.1	19773.9	23321	22084	20344.6	23035.8	22107.5	21953.8
P78560	P78560	CRADD_HUMAN	CRADD	Death domain-containing protein CRADD							732.287	3318.24
P80404	P80404	GABT_HUMAN	ABAT	4-aminobutyrate aminotransferase, mitochondrial		167.475		235.581				174.972
P81605;P81605-2	P81605;P81605-2	DCD_HUMAN	DCD	Dermcidin	150.284	175.189				576.843		521.894
P82650	P82650;P82650-2	RT22_HUMAN	MRPS22	Small ribosomal subunit protein mS22	1904.68	2483.29	2206.11	1755.77	1429.9	1140.39	1916.53	1790.08
P82663;P82663-2;P82663-3	P82663;P82663-2;P82663-3	RT25_HUMAN	MRPS25	Small ribosomal subunit protein mS25	828.063	868.324	297.036	430.176		852.949	447.949	1084.85
P82912;P82912-2	P82912;P82912-2;P82912-3	RT11_HUMAN	MRPS11	Small ribosomal subunit protein uS11m	2710.06	3214.72	3304.91	2546.26	3104.33	3037.64	2017.49	2470.94
P82914	P82914	RT15_HUMAN	MRPS15	Small ribosomal subunit protein uS15m	2070.44	3242.46	2143.1	2141.7	2384.52	1950.79	2251.99	1477.29
P82921	P82921	RT21_HUMAN	MRPS21	Small ribosomal subunit protein bS21m	297.662	744.529	679.024	304.977			328.854	201.335
P82933	P82933	RT09_HUMAN	MRPS9	Small ribosomal subunit protein uS9m	1061.41	1072.18	1074.5	841.501	1127.85	808.054	436.297	676.493
P83731	P83731	RL24_HUMAN	RPL24	Large ribosomal subunit protein eL24	17600.5	19238.2	20868.4	19998.9	22535.2	24531.6	22882.8	18700.3
P84085	P84085	ARF5_HUMAN	ARF5	ADP-ribosylation factor 5	46856.7	67339.9	51799.2	62850.8	54519.7	74148.7	54141.6	68112.7
P84095	P84095	RHOG_HUMAN	RHOG	Rho-related GTP-binding protein RhoG	1479.38	1567.59	1638.78	1249.64	962.117	1612.78	1676.41	1727.62
P84098	P84098	RL19_HUMAN	RPL19	Large ribosomal subunit protein eL19		1240.54	1384.51	2135.35	2296.35	1780.1	1625.23	590.443
P84103;P84103-2	P84103;Q16629;P84103-2;Q16629-2;Q16629-3;Q16629-4	SRSF3_HUMAN	SRSF3	Serine/arginine-rich splicing factor 3	17546.4	24400.5	22906.4	12219.4	22580.8	19917.9	16696	13769.3
P85037;P85037-2	P85037;P85037-2	FOXK1_HUMAN	FOXK1	Forkhead box protein K1	89.2533	406.203		253.82	325.561	700.234		165.794
P86790;P86791	P86791;P86790	CCZ1B_HUMAN;CCZ1_HUMAN	CCZ1;CCZ1B	Vacuolar fusion protein CCZ1 homolog B	5487.99	7666.78	6040.62	7305.33	7096.69	4137.35	7125.49	6547.07
P98164	P98164	LRP2_HUMAN	LRP2	Low-density lipoprotein receptor-related protein 2	8320.53	14797.2			8442.39	9263.37		15781.1
P98194;P98194-2;P98194-3;P98194-4;P98194-5;P98194-6;P98194-7;P98194-8;P98194-9	P98194;P98194-2;P98194-3;P98194-4;P98194-5;P98194-6;P98194-7;P98194-8;P98194-9	AT2C1_HUMAN	ATP2C1	Calcium-transporting ATPase type 2C member 1	1333	1226.83	899.308	906.641	796.519	846.505	945.5	779.323
P99999	P99999	CYC_HUMAN	CYCS	Cytochrome c	2705.27	5109.57	3483.21	4242.39	3785.85	3556.77	3749.19	4499.69
Q00325;Q00325-2	Q00325;Q00325-2	S25A3_HUMAN	SLC25A3	Solute carrier family 25 member 3	19900.8	32735	33626.6	33251.9	36348.9	30525.2	33787.2	30105.5
Q00341	Q00341;Q00341-2	VIGLN_HUMAN	HDLBP	Vigilin	7418.26	5582.72	5596.86	5559.45	5787.72	5419.33	5819.65	6511.51
Q00535	Q00535;Q00535-2	CDK5_HUMAN	CDK5	Cyclin-dependent kinase 5	2791.21	2433.97	2622.3	2570.26	3405.86	2949.94	3156.73	2514.97
Q00577	Q00577	PURA_HUMAN	PURA	Transcriptional activator protein Pur-alpha	4855.99	4857.46	5194.99	4348.39	4326.14	3980.96	4106.19	4620.67
Q00610;Q00610-2	P53675;Q00610;P53675-2;Q00610-2	CLH1_HUMAN	CLTC	Clathrin heavy chain 1	35576.9	34206.2	37685.3	36867.9	36156	35896.2	38385.3	39838.7
Q00765	Q00765;Q00765-2	REEP5_HUMAN	REEP5	Receptor expression-enhancing protein 5		2226.87	549.781	1658.31		932.313		877.865
Q00796	Q00796	DHSO_HUMAN	SORD	Sorbitol dehydrogenase	8497.16	11870.9	8143.66	11320.1	7748.16	12359.2	8631.67	12337.3
Q00839;Q00839-2	Q00839;Q00839-2	HNRPU_HUMAN	HNRNPU	Heterogeneous nuclear ribonucleoprotein U	26887.5	26515.6	30615.8	32623.2	36382.3	40569.3	37226.3	40510.8
Q01082	Q01082;Q01082-2;Q01082-3	SPTB2_HUMAN	SPTBN1	Spectrin beta chain, non-erythrocytic 1	1940.13	2104.03	1864.73	1942.91	2457.58	956.053	2329.98	1828.02
Q01130;Q01130-2	Q01130;Q01130-2	SRSF2_HUMAN	SRSF2	Serine/arginine-rich splicing factor 2		475.628	323.781		947.145	696.193	565.446	450.845
Q01201	Q01201	RELB_HUMAN	RELB	Transcription factor RelB								308.224
Q01415;Q01415-2	Q01415;Q01415-2	GALK2_HUMAN	GALK2	N-acetylgalactosamine kinase		433.793	629.943	564.307	556.602	1049.89	654.699	579.497
Q01518;Q01518-2	Q01518;Q01518-2	CAP1_HUMAN	CAP1	Adenylyl cyclase-associated protein 1	5385.94	5791.55	4812.24	5712.44	6568.04	6309.71	6041.32	7271.86
Q01581	Q01581	HMCS1_HUMAN	HMGCS1	Hydroxymethylglutaryl-CoA synthase, cytoplasmic	3069.57	4212.82	2616.85	3077.32	2871.32	3826.91	2336.33	3309.68
Q01650	Q01650	LAT1_HUMAN	SLC7A5	Large neutral amino acids transporter small subunit 1	14948.7	11569.8	16703.3	13675.2	17076.6	14956.2	15798.2	13506.4
Q01780;Q01780-2	Q01780;Q01780-2	EXOSX_HUMAN	EXOSC10	Exosome component 10	2353.34	1837.09	2608.57	1782.83	1872.81	1732.38	1926.7	2456.66
Q01804	Q01804;Q01804-3;Q01804-5	OTUD4_HUMAN	OTUD4	OTU domain-containing protein 4	300.89		925.101	283.17	8350.74	8152.48	6931.9	7778.41
Q01813	Q01813;Q01813-2	PFKAP_HUMAN	PFKP	ATP-dependent 6-phosphofructokinase, platelet type	18218.8	19767	20084.6	19977.9	19606.5	16879.7	19895.6	18793.6
Q01968;Q01968-2	Q01968;Q01968-2	OCRL_HUMAN	OCRL	Inositol polyphosphate 5-phosphatase OCRL	2793.17	1957.81	2478.1	1890.43	2341.64	2081.46	2198.32	2237.37
Q01970;Q01970-2	Q01970;Q01970-2	PLCB3_HUMAN	PLCB3	1-phosphatidylinositol 4,5-bisphosphate phosphodiesterase beta-3	2312.08	2513.75		3154.4	2721.78	2548.21	2763.51	2513.01
Q02127	Q02127	PYRD_HUMAN	DHODH	Dihydroorotate dehydrogenase (quinone), mitochondrial	408.499	584.255		420.817	404.982	547.758	500.949	553.207
Q02218;Q02218-2	Q02218;Q9ULD0;Q02218-2;Q9ULD0-2;Q9ULD0-3	ODO1_HUMAN	OGDH	2-oxoglutarate dehydrogenase complex component E1	3648.78	3679.16	3175.4	3409.47	3413.52	3465.62	4251.78	4450.77
Q02241;Q02241-2;Q02241-3	Q02241;Q02241-2;Q02241-3	KIF23_HUMAN	KIF23	Kinesin-like protein KIF23	859.657	1174.24	978.289	1412.25	1043.87	949.982	1077.36	1297.24
Q02252;Q02252-2	Q02252;Q02252-2	MMSA_HUMAN	ALDH6A1	Methylmalonate-semialdehyde dehydrogenase [acylating], mitochondrial	5598.7	5207.96	6850.9	5620.87	6908.66	6241.03	6439.98	5078.41
Q02338	Q02338	BDH_HUMAN	BDH1	D-beta-hydroxybutyrate dehydrogenase, mitochondrial	6827.6	5890.45	6755.76	5612.67	6442.21	5157.81	6457.7	5622.6
Q02413	Q02413	DSG1_HUMAN	DSG1	Desmoglein-1	373.215	1825.33
Q02543	Q02543	RL18A_HUMAN	RPL18A	Large ribosomal subunit protein eL20	1258.93	1945.38	2327.95	1793.31	1856.15	3367.8	2505.72	1940.58
Q02750;Q02750-2	Q02750;Q02750-2	MP2K1_HUMAN	MAP2K1	Dual specificity mitogen-activated protein kinase kinase 1		515.206	872.355	544.797	797.69	584.131	389.606	585.459
Q02790	Q02790	FKBP4_HUMAN	FKBP4	Peptidyl-prolyl cis-trans isomerase FKBP4	4780.17	5923.43	4566.46	5835.67	4492.33	3015.34	5060.55	4124.83
Q02809;Q02809-2	Q02809;Q02809-2	PLOD1_HUMAN	PLOD1	Procollagen-lysine,2-oxoglutarate 5-dioxygenase 1	909.05	1466.73	1131.13	1115.18	1490.63	1172.48	949.758	1504.1
Q02878	Q02878	RL6_HUMAN	RPL6	Large ribosomal subunit protein eL6	4402.39	6504.19	20321.1	17008.5	5728.3	16828	20566	7442.96
Q02880;Q02880-2	Q02880;Q02880-2	TOP2B_HUMAN	TOP2B	DNA topoisomerase 2-beta	1528.94	1157.54	1564.47	1402.22	1287.47	948.272	1517.57	1015.05
Q02978	Q02978;Q02978-2	M2OM_HUMAN	SLC25A11	Mitochondrial 2-oxoglutarate/malate carrier protein	2753.68	3295.07	3602.81	3661.68	3728.99	3960.42	3221.07	3342.23
Q03001;Q03001-14	Q03001;Q03001-14;Q03001-8	DYST_HUMAN	DST	Dystonin	1060.57	1888.56		1603.91	1929.34	1662.57	2356.97	1576.93
Q03154;Q03154-2;Q03154-4	Q03154;Q03154-2;Q03154-4	ACY1_HUMAN	ACY1	Aminoacylase-1						697.392	1028.53	781.284
Q03426	Q03426	KIME_HUMAN	MVK	Mevalonate kinase	1668.23	2294.55	2140.26	1637.47	2106.8	1969.42	1854.14	2370.92
Q04206;Q04206-2;Q04206-3;Q04206-4	Q04206;Q04206-2;Q04206-3;Q04206-4	TF65_HUMAN	RELA	Transcription factor p65	5511.03	5336.56	5160.22	5531.25	4951.9	5712.65	4506.81	4470.87
Q04323;Q04323-2	Q04323;Q04323-2	UBXN1_HUMAN	UBXN1	UBX domain-containing protein 1	2689.58	2218	2916.63	2850.53	2675.34	1675.65	1916.45	1790.96
Q04446	Q04446	GLGB_HUMAN	GBE1	1,4-alpha-glucan-branching enzyme	1240.51	1436.21	1811.57	2149.26	2088.87	1849.53	1791.75	1612.34
Q04637;Q04637-3;Q04637-4;Q04637-5;Q04637-8;Q04637-9	Q04637;Q04637-9;Q04637-3;Q04637-4;Q04637-5;Q04637-6;Q04637-7;Q04637-8	IF4G1_HUMAN	EIF4G1	Eukaryotic translation initiation factor 4 gamma 1	8596.03	5426.28	8321.56	6531.61	8408.75	6752.64	8857.64	6967.59
Q04726;Q04726-2;Q04726-3;Q04726-4;Q04726-5;Q04726-6;Q04726-7	Q04724;Q04725;Q04726;Q04727;Q04726-4;Q04726-2;Q04726-3;Q04726-5;Q04726-6;Q04726-7;Q04727-2;Q04727-3;Q04727-4;Q04725-2	TLE3_HUMAN	TLE3	Transducin-like enhancer protein 3	5949.97	6200.59	4768.53	3760.1	5160.4	4774.08	4593.47	5470.62
Q04837	Q04837	SSBP_HUMAN	SSBP1	Single-stranded DNA-binding protein, mitochondrial	9507.68	9266.4	9379.54	11154.9	8548.52	11318.6	7590.35	8959.44
Q04864;Q04864-2	Q04864;Q04864-2	REL_HUMAN	REL	Proto-oncogene c-Rel	3273.97	2472.98	2618.54	2206.76	2423.96	2556.56	2790.15	2608.03
Q04917	Q04917	1433F_HUMAN	YWHAH	14-3-3 protein eta	7281.21	6288.56	6744.52	6960.32	6740.31	5112.15	7707.6	7538.51
Q05048	Q05048	CSTF1_HUMAN	CSTF1	Cleavage stimulation factor subunit 1	625.631	806.119	631.902	782.434	1076.63	1562.33	687.12	1132.58
Q05086;Q05086-2;Q05086-3	Q05086;Q05086-2;Q05086-3	UBE3A_HUMAN	UBE3A	Ubiquitin-protein ligase E3A	2118.2	2153.92	2410.68	1433.28	3073.21	2564.18	2482.06	2560.94
Q05397;Q05397-2;Q05397-5;Q05397-7	Q05397;Q05397-2;Q05397-3;Q05397-5;Q05397-7	FAK1_HUMAN	PTK2	Focal adhesion kinase 1	1419.35	1333.17	1140.37	1478.22	1665.27	1326.88	1896.4	1766.59
Q05513;Q05513-2;Q05513-3	Q05513;Q05513-2;Q05513-3	KPCZ_HUMAN	PRKCZ	Protein kinase C zeta type	449.334	149.101				273.185	268.024	288.147
Q05639	Q05639	EF1A2_HUMAN	EEF1A2	Elongation factor 1-alpha 2	149039	248194	202779	235599	192754	222355	243056	250807
Q05655;Q05655-2	Q04759;Q05655;Q04759-2;Q04759-3;Q05655-2	KPCD_HUMAN	PRKCD	Protein kinase C delta type	1988.43	2114.44	2302.68	2339.09	2686.91	2389.77	2656.88	2309.3
Q06124-1	Q06124;Q06124-1;Q06124-3	PTN11_HUMAN	PTPN11	Isoform 2 of Tyrosine-protein phosphatase non-receptor type 11	3487.41	3602.74	4028.89	3853.07	3873.78	3899.31	3978.18	4332.72
Q06136	Q06136;Q06136-2	KDSR_HUMAN	KDSR	3-ketodihydrosphingosine reductase	1098.61	1783.7	1764.58	1949.72	1526.86	1442.8	1853.35	1899.61
Q06203	Q06203	PUR1_HUMAN	PPAT	Amidophosphoribosyltransferase	13280.4	17353	13687.8	15764	13583.8	16250.7	14745.7	17619.8
Q06210;Q06210-2	Q06210;Q06210-2	GFPT1_HUMAN	GFPT1	Glutamine--fructose-6-phosphate aminotransferase [isomerizing] 1	9092.97	11185.7	9393.61	10020.7	10654.8	9716.4	10184.2	11143.3
Q06265;Q06265-2	Q06265;Q06265-2	EXOS9_HUMAN	EXOSC9	Exosome complex component RRP45	5357.31	4822.04	4217.42	5385.47	5442.08	5285.67	5610.85	5060.57
Q06323	Q06323;Q06323-2;Q06323-3	PSME1_HUMAN	PSME1	Proteasome activator complex subunit 1	235.979	1241.24	448.188	278.644
Q06330;Q06330-2;Q06330-3;Q06330-4;Q06330-5;Q06330-6;Q06330-7	Q06330;Q06330-2;Q06330-3;Q06330-4;Q06330-5;Q06330-6;Q06330-7	SUH_HUMAN	RBPJ	Recombining binding protein suppressor of hairless	630.009	1508.59	1918.52	2094.05	1419.92	1510.81	1515.79	1102.99
Q06481;Q06481-3;Q06481-6	Q06481;Q06481-5;Q06481-2;Q06481-3;Q06481-4;Q06481-6	APLP2_HUMAN	APLP2	Amyloid beta precursor like protein 2	1809.64	2491.58	2240.75	2142.18	1911.2	2084.24	1896.34	1490.61
Q06787;Q06787-10;Q06787-11;Q06787-2;Q06787-3;Q06787-4;Q06787-5;Q06787-6;Q06787-7;Q06787-8;Q06787-9	Q06787;Q06787-7;Q06787-10;Q06787-11;Q06787-2;Q06787-3;Q06787-4;Q06787-5;Q06787-6;Q06787-8;Q06787-9	FMR1_HUMAN	FMR1	Fragile X messenger ribonucleoprotein 1								565.53
Q06830	Q06830	PRDX1_HUMAN	PRDX1	Peroxiredoxin-1	80148.8	112804	75842	123147	85938.6	103213	87712.6	108841
Q07020;Q07020-2	Q07020;Q07020-2	RL18_HUMAN	RPL18	Large ribosomal subunit protein eL18	4816.89	5371.32	10329.6	6756.56	4761.48	10200	10050.9	5801.77
Q07021	Q07021	C1QBP_HUMAN	C1QBP	Complement component 1 Q subcomponent-binding protein, mitochondrial	751.512	1156.39	605.051	1735.67	656.591	766.114	477.425	1209.44
Q07065	Q07065	CKAP4_HUMAN	CKAP4	Cytoskeleton-associated protein 4	1443.49	1775.09	1027.51	1478.39	1407.07	929.051	1233.57	1226.13
Q07666;Q07666-2	Q07666;Q07666-2;Q07666-3	KHDR1_HUMAN	KHDRBS1	KH domain-containing, RNA-binding, signal transduction-associated protein 1	3141.46	2681.31	2904.17	2388.33	2444.45	2361.11	2477.67	2232.21
Q07812;Q07812-2;Q07812-5;Q07812-7;Q07812-8	Q07812;Q07812-8;Q07812-2;Q07812-5;Q07812-7	BAX_HUMAN	BAX	Apoptosis regulator BAX	504.771	1543.93	1005.87	909.525	1247.09		933.701
Q07864	Q07864	DPOE1_HUMAN	POLE	DNA polymerase epsilon catalytic subunit A	1195.73	904.473	1289.09	1190.44	1110.19	886.017	1259.89	1092.05
Q07866;Q07866-10;Q07866-2;Q07866-3;Q07866-4;Q07866-5;Q07866-6;Q07866-7;Q07866-8;Q07866-9	Q07866;Q07866-10;Q07866-2;Q07866-3;Q07866-4;Q07866-5;Q07866-6;Q07866-7;Q07866-8;Q07866-9	KLC1_HUMAN	KLC1	Kinesin light chain 1	835.564	880.955	758.006	520.53	537.236	439.726	497.942	772.797
Q07955	Q07955;Q07955-2;Q07955-3	SRSF1_HUMAN	SRSF1	Serine/arginine-rich splicing factor 1	14796.4	19459.7	18255.8	17470.5	17902.6	17911.7	14937.2	13102.8
Q07960	Q07960	RHG01_HUMAN	ARHGAP1	Rho GTPase-activating protein 1	3311.01	2677.19	4060.22	3024.35	3466.37	2482.52	2800.34	2665.86
Q08209;Q08209-2;Q08209-3	P16298;P48454;Q08209;Q08209-2;P16298-2;P16298-3;P16298-4;P48454-2;P48454-3;Q08209-3;Q08209-5	PP2BA_HUMAN	PPP3CA	Protein phosphatase 3 catalytic subunit alpha	2734.03	2266.65	3110.99	2862.06	3406.47	3150.83	3105.61	3052.13
Q08211	Q08211	DHX9_HUMAN	DHX9	ATP-dependent RNA helicase A	14635.2	14746.1	16299.5	15318.4	16591.2	16205.4	16515.6	15552
Q08257;Q08257-3	Q08257;Q08257-3	QOR_HUMAN	CRYZ	Quinone oxidoreductase	7765.84	6559.03	7498.53	6463.97	7596.85	7142.78	7982.44	6496.45
Q08345;Q08345-2;Q08345-5;Q08345-6	Q08345;Q08345-2;Q08345-4;Q08345-5;Q08345-6	DDR1_HUMAN	DDR1	Epithelial discoidin domain-containing receptor 1	1275.02	755.022	1074.8	1052.18	1594.98	1031.09	1212.32	1052.09
Q08380	Q08380	LG3BP_HUMAN	LGALS3BP	Galectin-3-binding protein		888.387	648.781	455.836	377.308	583.986	652.784	490.879
Q08493	Q08493	PDE4C_HUMAN	PDE4C	cAMP-specific 3',5'-cyclic phosphodiesterase 4C	824.955				720.101	511.404		1293.02
Q08554;Q08554-2	Q08554;Q08554-2	DSC1_HUMAN	DSC1	Desmocollin-1		2024.66
Q08752	Q08752	PPID_HUMAN	PPID	Peptidyl-prolyl cis-trans isomerase D	802.97	1104.24	904.649	1697.35	758.956	753.435	892.238	1003.08
Q08945	Q08945	SSRP1_HUMAN	SSRP1	FACT complex subunit SSRP1	1331.1	1532.03	2076.85	1326.68	1768.66	1488.63	1417.37	874.882
Q08J23;Q08J23-2	Q08J23;Q08J23-2;Q08J23-3	NSUN2_HUMAN	NSUN2	RNA cytosine C(5)-methyltransferase NSUN2	6955.83	7170.33	6892.75	6876.76	6736.79	5956.87	6980.36	7307.67
Q09028;Q09028-2;Q09028-3;Q09028-4	Q09028;Q09028-2;Q09028-3;Q09028-4	RBBP4_HUMAN	RBBP4	Histone-binding protein RBBP4	9070	14913.4	9505.29	10138.5	8024.16	7895.4	6886.81	8275.71
Q09161	Q09161	NCBP1_HUMAN	NCBP1	Nuclear cap-binding protein subunit 1	2101.88	1742.53	2244.56	1927.49	2893.96	2275.01	3078.81	2223.46
Q09666	Q09666	AHNK_HUMAN	AHNAK	Neuroblast differentiation-associated protein AHNAK	6966.24	6697.31	6488.07	5870.68	7030.36	5792.66	6314.22	7080.69
Q0VDF9	Q0VDF9	HSP7E_HUMAN	HSPA14	Heat shock 70 kDa protein 14	2516.32	3121.29	3394.88	3085.65	3156.94	2757	2271.53	3690.64
Q10567-3	P63010;P63010-2;Q10567;Q10567-3;P63010-3;Q10567-2;Q10567-4	AP1B1_HUMAN	AP1B1	Isoform C of AP-1 complex subunit beta-1	12099.8	10686.1	11559.2	11677.5	11770.2	10982	11100.1	10711.3
Q10570	Q10570	CPSF1_HUMAN	CPSF1	Cleavage and polyadenylation specificity factor subunit 1	1792.78	1536.51	1180.67	2016.01	2136.95	2376.64	2027.25	1602.69
Q10713	Q10713;Q10713-2	MPPA_HUMAN	PMPCA	Mitochondrial-processing peptidase subunit alpha	2928.86	3058.51	2995.16	3596.2	3094.28	3454.36	3169.12	3053.38
Q12765;Q12765-2;Q12765-3	Q12765;Q12765-2;Q12765-3	SCRN1_HUMAN	SCRN1	Secernin-1		714.795	756.574	562.215		504.854	470.854	983.376
Q12768	Q12768	WASC5_HUMAN	WASHC5	WASH complex subunit 5	3536.11	2648.44	2938.51	2770.45	3110.82	2161.75	2860.15	2487.56
Q12769	Q12769	NU160_HUMAN	NUP160	Nuclear pore complex protein Nup160	553.807	568.865	1129.77	1100.92	1030.09	963.306	1263.81	1140.78
Q12774;Q12774-2	Q12774;Q12774-2	ARHG5_HUMAN	ARHGEF5	Rho guanine nucleotide exchange factor 5	403.968		663.524	624.499	1409.51	1035.01	558.268	1069.6
Q12788	Q12788	TBL3_HUMAN	TBL3	Transducin beta-like protein 3	1419.05	1497.97	1485.65	1891.08	1473.97	1675	1664.78	1119.81
Q12789	Q12789;Q12789-3	TF3C1_HUMAN	GTF3C1	General transcription factor 3C polypeptide 1	1249.97	1567.34	1205.52	1620.31	1814.59	1694.28	1587.23	1234.17
Q12792;Q12792-4	Q12792;Q6IBS0;Q12792-3;Q12792-4	TWF1_HUMAN	TWF1	Twinfilin-1	4955.08	6374.23	5371.44	5337.67	5100.47	5607.67	5353.98	4178.6
Q12849	Q12849;Q12849-5	GRSF1_HUMAN	GRSF1	G-rich sequence factor 1	1730.47	1368.23	1570.48	1295.48	1765.8	703.398		1271.01
Q12904;Q12904-2	Q12904;Q12904-2	AIMP1_HUMAN	AIMP1	Aminoacyl tRNA synthase complex-interacting multifunctional protein 1	3112.73	3653.89	3353.22	3573.39	2629	3218.92	3661.61	3557.05
Q12905	Q12905	ILF2_HUMAN	ILF2	Interleukin enhancer-binding factor 2	18664.5	15463.8	19604.5	20924.1	21016.4	19774.6	20446	18374.3
Q12906;Q12906-2;Q12906-3;Q12906-4;Q12906-5;Q12906-6;Q12906-7	Q12906;Q12906-2;Q12906-3;Q12906-4;Q12906-5;Q12906-6;Q12906-7	ILF3_HUMAN	ILF3	Interleukin enhancer-binding factor 3	15249.5	11293.9	12838.2	12222.6	11997.3	11642.9	13653	12877.9
Q12907	Q12907	LMAN2_HUMAN	LMAN2	Vesicular integral-membrane protein VIP36	4041.91	6105	3903.04	5177.36	4843.43	6512.68	4562.33	7146.63
Q12931;Q12931-2	Q12931;Q12931-2	TRAP1_HUMAN	TRAP1	Heat shock protein 75 kDa, mitochondrial	55447.5	52808.2	63497.7	58765.1	57960.5	59030.8	56386.3	62911.4
Q12933;Q12933-2;Q12933-3;Q12933-4	Q12933;Q12933-2;Q12933-3;Q12933-4	TRAF2_HUMAN	TRAF2	TNF receptor-associated factor 2	1540	1968.48	1361.77	1322.72	2019.04	1144.59	1271.15	1851.94
Q12955;Q12955-4;Q12955-5;Q12955-6;Q12955-7	Q01484;Q12955;Q01484-2;Q01484-5;Q12955-4;Q12955-5;Q12955-6;Q12955-7	ANK3_HUMAN	ANK3	Ankyrin-3	1034	1537.92	1233.83	1383.79	1737.54	1344.3	1349.45	1265.79
Q12979;Q12979-2;Q12979-4	Q12979;Q12979-2;Q12979-4	ABR_HUMAN	ABR	Active breakpoint cluster region-related protein	2148.4	2096.22	2530.32	2446.46	2276.78	2156.84	2391.33	1941
Q13011	Q13011	ECH1_HUMAN	ECH1	Delta(3,5)-Delta(2,4)-dienoyl-CoA isomerase, mitochondrial	8571.93	10289	7565.68	9464.3	7896.6	10754	8346.92	11106.9
Q13033;Q13033-2	Q13033;Q9NRL3;Q13033-2;Q9NRL3-3	STRN3_HUMAN	STRN3	Striatin-3	2434.97	2554.42	2448.57	2216.76	2447.66	2468.03	2188.79	2671.89
Q13045	Q13045;Q13045-2;Q13045-3	FLII_HUMAN	FLII	Protein flightless-1 homolog	5143.27	4853.95	5056.23	3777.13	5385.2	4419.28	5054.36	4900.08
Q13057;Q13057-2	Q13057;Q13057-2	COASY_HUMAN	COASY	Bifunctional coenzyme A synthase	804.342	482.63	748.442	473.119	766.503	464.897	792.251	506.62
Q13085;Q13085-2;Q13085-3;Q13085-4	Q13085;Q13085-2;Q13085-3;Q13085-4	ACACA_HUMAN	ACACA	Acetyl-CoA carboxylase 1	4197.88	3840.55	3798.93	3328.55	3866.23	3862.49	3934.2	3622.39
Q13098;Q13098-5;Q13098-6;Q13098-7	Q13098;Q13098-5;Q13098-6;Q13098-7	CSN1_HUMAN	GPS1	COP9 signalosome complex subunit 1	1130.85	513.724	1256.68	1351.46	801.377	976.356	1269.39	1044.56
Q13107;Q13107-2	Q13107;Q13107-2;Q13107-3	UBP4_HUMAN	USP4	Ubiquitin carboxyl-terminal hydrolase 4	2494.87	1967.72	1656.81	3412.99	32296.6	34822.4	28711.6	34279.5
Q13131;Q13131-2	Q13131;Q13131-2	AAPK1_HUMAN	PRKAA1	5'-AMP-activated protein kinase catalytic subunit alpha-1	2793.21	2913.39	2837.71	3421.3	2964.93	2888.57	2961.1	2968.31
Q13144	Q13144	EI2BE_HUMAN	EIF2B5	Translation initiation factor eIF-2B subunit epsilon	4024.64	4233.45	5034.78	4075.22	4615.53	4557.53	4750.46	3834.08
Q13148	Q13148	TADBP_HUMAN	TARDBP	TAR DNA-binding protein 43	3119.59	3072.99	2500.32	2385.69	3321.21	2547.65	3264.33	2695.95
Q13151	Q13151	ROA0_HUMAN	HNRNPA0	Heterogeneous nuclear ribonucleoprotein A0	3423.89	3671.35	3552.89	3801.3	4226.15	3741.54	4088.57	3702.52
Q13155;Q13155-2	Q13155;Q13155-2	AIMP2_HUMAN	AIMP2	Aminoacyl tRNA synthase complex-interacting multifunctional protein 2	13304.6	15856.3	17066.2	16183.5	17144.7	15127.5	16009.1	16214.9
Q13162	Q13162	PRDX4_HUMAN	PRDX4	Peroxiredoxin-4	12438.4	13864	10985.1	12351.7	11871.6	11279.7	12193.2	8758.61
Q13177	Q13177	PAK2_HUMAN	PAK2	Serine/threonine-protein kinase PAK 2	13771.9	12208.4	11428.6	12816.1	8276.69	9852.37	10879.9	11973.9
Q13185	Q13185	CBX3_HUMAN	CBX3	Chromobox protein homolog 3	267.108		263.782	506.983	287.02	390.855		267.41
Q13188;Q13188-2	Q13188;Q13188-2	STK3_HUMAN	STK3	Serine/threonine-protein kinase 3	898.966	937.323	944.314	790.147	1023.08	704.747	818.808	1268
Q13200	Q13200;Q13200-2;Q13200-3	PSMD2_HUMAN	PSMD2	26S proteasome non-ATPase regulatory subunit 2	29114.2	34836.8	31419.9	36485	32934.6	34984.5	32603.2	32960.8
Q13228;Q13228-4	Q13228;Q13228-2;Q13228-3;Q13228-4	SBP1_HUMAN	SELENBP1	Methanethiol oxidase	10149.9	12767.2	10284.8	12180.1	9489.22	12359	8969.92	12157.3
Q13247;Q13247-3	Q13247;Q13247-3	SRSF6_HUMAN	SRSF6	Serine/arginine-rich splicing factor 6	12948.4	19500.2	15818.8	15913.7	12114.4	10539.2	10932.8	9403.6
Q13257	Q13257	MD2L1_HUMAN	MAD2L1	Mitotic spindle assembly checkpoint protein MAD2A	13552.8	17265.3	14140	12812.2	12901	11809.2	12555.9	11279.8
Q13263	Q13263;Q13263-2	TIF1B_HUMAN	TRIM28	Transcription intermediary factor 1-beta	15799.1	12770.3	15309.3	14651.7	16176.4	10171.1	17725.6	12314.3
Q13283	Q13283;Q9UN86;Q13283-2;Q9UN86-2	G3BP1_HUMAN	G3BP1	Ras GTPase-activating protein-binding protein 1	6139.33	5311.66	6182.36	4956.24	12172.7	5504.55	9884.7	5927.66
Q13308;Q13308-2;Q13308-4;Q13308-6	Q13308;Q13308-2;Q13308-3;Q13308-4;Q13308-5;Q13308-6	PTK7_HUMAN	PTK7	Inactive tyrosine-protein kinase 7	5489.57	5244.59	4784.71	5922.93	4319.38	4243.42	4920.94	4701.98
Q13310;Q13310-2;Q13310-3	Q13310;Q13310-2;Q13310-3	PABP4_HUMAN	PABPC4	Polyadenylate-binding protein 4	5383.2	4260.17	4787.06	4936.67	5473.22	4603.28	5462.02	5485.95
Q13330-3	Q13330;Q9BTC8;Q13330-2;Q13330-3;Q9BTC8-2	MTA1_HUMAN	MTA1	Isoform 3 of Metastasis-associated protein MTA1	476.832	708.513	399.228	771.496	815.585	783.954	665.874	771.103
Q13347	Q13347	EIF3I_HUMAN	EIF3I	Eukaryotic translation initiation factor 3 subunit I	18043.8	20491.6	17097.4	17839.6	19613.8	18999.9	18687.8	17100.3
Q13363;Q13363-2	Q13363;Q13363-2	CTBP1_HUMAN	CTBP1	C-terminal-binding protein 1	2475.26	2790.21	2547.81	2698.94	2473.73	2325.02	2451.2	2596.6
Q13371;Q13371-2	Q13371;Q13371-2	PHLP_HUMAN	PDCL	Phosducin-like protein		2105.98	1135.9	1246.01	1413.96	1475.42	1689.77	1846.4
Q13404;Q13404-1;Q13404-2;Q13404-7	Q13404;Q13404-1;Q13404-2;Q13404-6;Q13404-7	UB2V1_HUMAN	UBE2V1	Ubiquitin-conjugating enzyme E2 variant 1	8520.66	7779.7	10161.3	8267.63	8089.85	8111.97	9245.2	8564.43
Q13405	Q13405	RM49_HUMAN	MRPL49	Large ribosomal subunit protein mL49	255.516	261.396	174.665		285.714		533.337
Q13409;Q13409-2;Q13409-3;Q13409-5;Q13409-6;Q13409-7	Q13409;Q13409-3;Q13409-2;Q13409-5;Q13409-6;Q13409-7	DC1I2_HUMAN	DYNC1I2	Cytoplasmic dynein 1 intermediate chain 2	2011.89	2462.31	1984.57	2951.91	2598.34	2410.46	2456.63	3329.94
Q13418;Q13418-2;Q13418-3	Q13418;Q13418-2;Q13418-3	ILK_HUMAN	ILK	Integrin-linked protein kinase	623.53	916.016	771.957	778.721	804.003	775.634	888.271	950.925
Q13423	Q13423	NNTM_HUMAN	NNT	NAD(P) transhydrogenase, mitochondrial	2801.22	2852.19	2888.36	2825.88	2351.66	2226.57	2077.21	2279.71
Q13425	Q13425	SNTB2_HUMAN	SNTB2	Beta-2-syntrophin	1404.87	924.198	1197.34	1384.72	931.953	618.721	1163.28	809.748
Q13426;Q13426-2;Q13426-3	Q13426;Q13426-2;Q13426-3	XRCC4_HUMAN	XRCC4	DNA repair protein XRCC4	1494.72	1003.59		1366.97	988.717	604.017	1211.72	566.908
Q13428;Q13428-2;Q13428-3;Q13428-4;Q13428-8	Q13428;Q13428-2;Q13428-3;Q13428-4;Q13428-6;Q13428-7;Q13428-8	TCOF_HUMAN	TCOF1	Treacle protein	4360.8	5867.08	6313.09	8143.48	10134.3	9925.36	8050.08	5648.71
Q13435	Q13435	SF3B2_HUMAN	SF3B2	Splicing factor 3B subunit 2	2257.36	1478.52	1753.05	1764.28	1344.81	1301.44	1874.69	1547.43
Q13439;Q13439-3;Q13439-4;Q13439-5	Q13439;Q13439-3;Q13439-4;Q13439-5	GOGA4_HUMAN	GOLGA4	Golgin subfamily A member 4	1284.33	886.005	1187.68	1465.99	1007.97	1206.33	990.645	672.203
Q13445	Q13445	TMED1_HUMAN	TMED1	Transmembrane emp24 domain-containing protein 1	953.431	1623.94	2453.93	1651.45	1594.32	1553.16	1307.36	2069.73
Q13454;Q13454-2	Q13454;Q13454-2	TUSC3_HUMAN	TUSC3	Tumor suppressor candidate 3	1292.2	1230.73		1218.1	1235.48	1615.82	1333.71	918.701
Q13464	Q13464	ROCK1_HUMAN	ROCK1	Rho-associated protein kinase 1		484.488		382.138			249.972
Q13492;Q13492-2;Q13492-3;Q13492-4;Q13492-5	Q13492;Q13492-2;Q13492-3;Q13492-4;Q13492-5	PICAL_HUMAN	PICALM	Phosphatidylinositol-binding clathrin assembly protein	1299.42	551.794	1358.62	1048.94	1564.09	1319.39	1323.08	1026.68
Q13501	Q13501	SQSTM_HUMAN	SQSTM1	Sequestosome-1	358.22	335.916	841.219	623.484	651.18	593.743	735.057	730.314
Q13509	Q13509;Q13509-2	TBB3_HUMAN	TUBB3	Tubulin beta-3 chain	8697.56	8500.14	8182.45	5991.27	7803.31	6087.35	7144.46	4844.89
Q13510;Q13510-2;Q13510-3	Q13510;Q13510-2;Q13510-3	ASAH1_HUMAN	ASAH1	Acid ceramidase	1517.34	2053.24	1069.68	1409.46		2008.84	896.324	1349.27
Q13546	Q13546;Q13546-2	RIPK1_HUMAN	RIPK1	Receptor-interacting serine/threonine-protein kinase 1	2186.37	2699.66	2164.03	2410.64	2468.36	1897.51	2265.75	1755.08
Q13547	Q13547	HDAC1_HUMAN	HDAC1	Histone deacetylase 1	2864.18	3702.05	3236.09	4294.94	4440.67	4395.41	2399.09	3775.18
Q13555;Q13555-10;Q13555-11;Q13555-2;Q13555-3;Q13555-4;Q13555-5;Q13555-6;Q13555-7;Q13555-8;Q13555-9	Q13555;Q13555-5;Q13555-10;Q13555-11;Q13555-2;Q13555-3;Q13555-4;Q13555-6;Q13555-7;Q13555-8;Q13555-9	KCC2G_HUMAN	CAMK2G	Calcium/calmodulin-dependent protein kinase type II subunit gamma	1378.62	2073.73	1562.25	1321.99	1448.45	1375.48	1791.18	1222.23
Q13564;Q13564-2;Q13564-3;Q13564-4	Q13564;Q13564-2;Q13564-3;Q13564-4	ULA1_HUMAN	NAE1	NEDD8-activating enzyme E1 regulatory subunit	4004.48	4544.02	3938.31	4445.88	4156.67	4020.6	4412.11	5158.45
Q13569	Q13569	TDG_HUMAN	TDG	G/T mismatch-specific thymine DNA glycosylase	1008.93	1239.3	834.407	950.303	1085.15	743.288	1414.85	1245.88
Q13572	Q13572;Q13572-2	ITPK1_HUMAN	ITPK1	Inositol-tetrakisphosphate 1-kinase	11129.1	11030.9	11579	10080.3	10914.6	8103.25	9346.4	11428.3
Q13596;Q13596-2	Q13596;Q13596-2	SNX1_HUMAN	SNX1	Sorting nexin-1	2827.76	2457.15	3003.39	2594.67	3107.41	1812.39	2931.91	2287.95
Q13610	Q13610	PWP1_HUMAN	PWP1	Periodic tryptophan protein 1 homolog	745.919	1584.6	1475.13	1580.75		1782.21	1179.41	1568.6
Q13613;Q13613-2	Q13613;Q13613-2	MTMR1_HUMAN	MTMR1	Myotubularin-related protein 1	444.151	303.737	329.724	695.394		561.521	521.188	476.83
Q13615;Q13615-2;Q13615-3	Q13615;Q13615-2;Q13615-3	MTMR3_HUMAN	MTMR3	Myotubularin-related protein 3	4086.27	5746.78	4502.22	4408.97	4568.35	4511.8	4359.13	5178.72
Q13616	Q13616	CUL1_HUMAN	CUL1	Cullin-1	3853.19	4067.59	3485.75	4964.82	4237.2	4015.54	4359.68	4840.21
Q13617;Q13617-2	Q13617;Q13617-2	CUL2_HUMAN	CUL2	Cullin-2	2754.81	3582.94	3095.11	4239.17	3073.59	3860.53	3667.12	4571.91
Q13618;Q13618-2	Q13618;Q13618-2	CUL3_HUMAN	CUL3	Cullin-3	4387.58	4652.56	4451.64	4428.03	4848.67	4706	5564.25	4492.58
Q13619	Q13619;Q13620;Q13619-2;Q13620-1;Q13620-3	CUL4A_HUMAN	CUL4A	Cullin-4A	5351.82	5046.49	5622.7	4931.03	4946.71	5213.44	4688.73	5468.71
Q13620;Q13620-1;Q13620-3	Q13620;Q13620-1;Q13620-3	CUL4B_HUMAN	CUL4B	Cullin-4B	2524.7	3438.04	2292.06	2870.59	3017.64	2587.4	2139.93	2673.49
Q13630	Q13630	FCL_HUMAN	GFUS	GDP-L-fucose synthase	4378.21	3154.12	2879.85	3316.66	2722.56	2085.91	2468.54	2741.37
Q13636;Q9UL26	Q13636;Q9UL26	RAB31_HUMAN;RB22A_HUMAN	RAB22A;RAB31	Ras-related protein Rab-31		492.217	568.575		886.226	861.102	505.485	1397.27
Q13685	Q13685	AAMP_HUMAN	AAMP	Angio-associated migratory cell protein	1239.18	2337.46	1768.64	1560.86	861.629	1755.07	1606.42	1358.28
Q13724;Q13724-2	Q13724;Q13724-2	MOGS_HUMAN	MOGS	Mannosyl-oligosaccharide glucosidase	1625.32	2340.54	2261.21	2393.22	1951.74	2669.19	1949.19	2539.01
Q13813;Q13813-2;Q13813-3	Q13813;Q13813-2;Q13813-3	SPTN1_HUMAN	SPTAN1	Spectrin alpha chain, non-erythrocytic 1	879.273	1311.59	450.367	880.184	778.89	514.989	422.456	670.987
Q13838;Q13838-2	Q13838;Q13838-2	DX39B_HUMAN	DDX39B	Spliceosome RNA helicase DDX39B	6554.89	6646.5	6314.22	5514.38	5738.88	6139.54	6692.97	5434.88
Q13867	Q13867	BLMH_HUMAN	BLMH	Bleomycin hydrolase	1681.25	3960.89	487.798	1387.19	754.82	952.997	903.295	1016.71
Q13868;Q13868-3	Q13868;Q13868-2;Q13868-3	EXOS2_HUMAN	EXOSC2	Exosome complex component RRP4	4096.83	4040.1	4057.57	4612.25	3515.95	4312.61	4397.59	3995.63
Q13885	Q13885	TBB2A_HUMAN	TUBB2A	Tubulin beta-2A chain	502.256	585.763	733.732	532.388	239.822	420.463	631.525	441.978
Q13888;Q6P1K8	Q13888;Q6P1K8	T2H2L_HUMAN;TF2H2_HUMAN	GTF2H2;GTF2H2C	General transcription factor IIH subunit 2	536.303	548.38	1218.44	546.442	625.935	447.882	1013.58	598.918
Q13907;Q13907-2	Q13907;Q13907-2	IDI1_HUMAN	IDI1	Isopentenyl-diphosphate Delta-isomerase 1	6510.16	10810.6	7797.53	7586.59	8303.43	8112.6	9074.78	8006.12
Q13952;Q13952-2;Q13952-3;Q13952-5;Q13952-6;Q13952-7	Q13952;Q13952-2;Q13952-3;Q13952-5;Q13952-6;Q13952-7	NFYC_HUMAN	NFYC	Nuclear transcription factor Y subunit gamma	589.95		955.168	1022.05		1003.12	1463.41	781.565
Q14008;Q14008-2;Q14008-3	Q14008;Q14008-2;Q14008-3	CKAP5_HUMAN	CKAP5	Cytoskeleton-associated protein 5	2955.89	3429.37	2960.49	2303.75	2985.04	2470.2	2982.5	2621.48
Q14103;Q14103-2;Q14103-3;Q14103-4	Q14103;Q14103-4;Q14103-2;Q14103-3	HNRPD_HUMAN	HNRNPD	Heterogeneous nuclear ribonucleoprotein D0	9517.11	8437.67	8289.59	10193.5	9877.66	8344.58	9403.11	7362.51
Q14126	Q14126	DSG2_HUMAN	DSG2	Desmoglein-2	1365.61	1373.57	1532.59	1265.13	1657.51	922.917	1354.01	1321.69
Q14137;Q14137-2	Q14137;Q14137-2	BOP1_HUMAN	BOP1	Ribosome biogenesis protein BOP1	727.455	1282.19	900.441	1520.05	1409.94	1784.02	1055.27	1617.02
Q14139;Q14139-2	Q14139;Q14139-2	UBE4A_HUMAN	UBE4A	Ubiquitin conjugation factor E4 A	1306.58	1322.85	1708.16	1369.05	705.789	1370.88	1494.66	1293.84
Q14145	Q14145	KEAP1_HUMAN	KEAP1	Kelch-like ECH-associated protein 1	2100.03	2339.29	2192.36	2126.04	2504.82	2079.6	2384.72	2255.74
Q14151	Q14151	SAFB2_HUMAN	SAFB2	Scaffold attachment factor B2	1266.15	644.646	885.423	1670.58	1443.12	1787.47	1533.93	1592.39
Q14152	Q14152;Q14152-2	EIF3A_HUMAN	EIF3A	Eukaryotic translation initiation factor 3 subunit A	6738.38	6693.14	8947.74	8318.79	8376.46	7420	9556.98	8071.78
Q14157;Q14157-1;Q14157-3;Q14157-4;Q14157-5	Q14157;Q14157-1;Q14157-3;Q14157-4;Q14157-5	UBP2L_HUMAN	UBAP2L	Ubiquitin-associated protein 2-like	2601.57	3034.54	3125.1	2451.13	2290.12	1848.23	2428.17	3105.49
Q14160;Q14160-3	Q14160;Q14160-2;Q14160-3	SCRIB_HUMAN	SCRIB	Protein scribble homolog	3262.13	3139.73	3337.03	2757.4	3191.04	2431.15	3149.66	2809.8
Q14166	Q14166	TTL12_HUMAN	TTLL12	Tubulin--tyrosine ligase-like protein 12	7093.52	8020.46	8010.15	7615.21	7089.81	7459.08	7374.95	8601.17
Q14197	Q14197	ICT1_HUMAN	MRPL58	Large ribosomal subunit protein mL62	4570.76	3298.89	3686.58	3957.67	3632.71	4619.49	4281.51	3261.23
Q14203;Q14203-3;Q14203-4;Q14203-6	Q14203;Q14203-5;Q14203-2;Q14203-3;Q14203-4;Q14203-6	DCTN1_HUMAN	DCTN1	Dynactin subunit 1	3925.86	3885.83	3931.55	3920.44	3750.16	3714.15	4183	3603.15
Q14204	Q14204	DYHC1_HUMAN	DYNC1H1	Cytoplasmic dynein 1 heavy chain 1	14994.5	14334.9	16657.8	15116.3	13915.9	16233.6	15474.1	15703.7
Q14232	Q14232;Q14232-2	EI2BA_HUMAN	EIF2B1	Translation initiation factor eIF-2B subunit alpha	2987.65	3263.49	3513.76	3271.13	2108.25	2315.15	3190.65	3314.61
Q14240;Q14240-2	Q14240;Q14240-2	IF4A2_HUMAN	EIF4A2	Eukaryotic initiation factor 4A-II	1204.42	1259.48	886.517	1240.27	543.94	1346.3	1008.42	787.684
Q14247	Q14247;Q14247-2;Q14247-3	SRC8_HUMAN	CTTN	Src substrate cortactin	8550.27	8137.97	8117.67	8936.92	6518.61	7198.27	7108.92	7199.67
Q14254	Q14254	FLOT2_HUMAN	FLOT2	Flotillin-2	4489.4	5178.29	4926.19	5280.68	4047.28	4886.82	4772.09	5197.01
Q14258	Q14258	TRI25_HUMAN	TRIM25	E3 ubiquitin/ISG15 ligase TRIM25	6024.24	6179.35	5698.19	6037.82	6998.71	7021.54	5844.45	6989.44
Q14331	Q14331	FRG1_HUMAN	FRG1	Protein FRG1	1297.9	2880.66	1690.63	2456.65	3840.13	4142.65	3235.41	3730.16
Q14344	Q14344;Q14344-2	GNA13_HUMAN	GNA13	Guanine nucleotide-binding protein subunit alpha-13	41399.7	37779.7	41830.5	46951.1	37554.1	34794.7	40133.7	41098.3
Q14376	Q14376	GALE_HUMAN	GALE	UDP-glucose 4-epimerase	555.692	688.463	1013.22	577.012	638.462	658.112	693.3	349.297
Q14444;Q14444-2	Q14444;Q14444-2	CAPR1_HUMAN	CAPRIN1	Caprin-1	1774.59	2074.51	1183.86	1638.38	1339.94	1166.59	1113.25	1089.15
Q14527;Q14527-2	Q14527;Q14527-2	HLTF_HUMAN	HLTF	Helicase-like transcription factor	3052.36	4217.92	3795.32	3184.71	2674.47	3109.23	2692.13	3672.91
Q14534	Q14534	ERG1_HUMAN	SQLE	Squalene monooxygenase	1860.47	1805.91	1952.1	1843.06	2291.96	1765.96	2147.58	2355.33
Q14558;Q14558-2	Q14558;Q14558-2	KPRA_HUMAN	PRPSAP1	Phosphoribosyl pyrophosphate synthase-associated protein 1	1011.09	1190.92	1202.34	1063.18	1040.41	861.506	743.515	930.879
Q14562	Q14562	DHX8_HUMAN	DHX8	ATP-dependent RNA helicase DHX8	248.338		506.272	594.209	1016.61	757.502
Q14566	Q14566	MCM6_HUMAN	MCM6	DNA replication licensing factor MCM6	11825.9	13359.5	12299.4	12405.8	11194.4	11034.8	11625.3	11340.2
Q14571;Q14643;Q14643-2;Q14643-3;Q14643-4;Q14643-5;Q14643-6;Q14643-7;Q14643-8	Q14571;Q14643;Q14643-2;Q14643-3;Q14643-4;Q14643-5;Q14643-6;Q14643-7;Q14643-8	ITPR1_HUMAN;ITPR2_HUMAN	ITPR1;ITPR2	Inositol 1,4,5-trisphosphate receptor type 2								561.096
Q14651	Q14651	PLSI_HUMAN	PLS1	Plastin-1	503.377		819.807	1289.63	843.74		872.678	1490.79
Q14667;Q14667-2;Q14667-3	Q14667;Q14667-2;Q14667-3	BLTP2_HUMAN	BLTP2	Bridge-like lipid transfer protein family member 2	7999.92	11388.2	8444.27	11360.3	13687.4	8712.93	9333.03	7189.9
Q14677;Q14677-2;Q14677-3	Q14677;Q14677-2;Q14677-3	EPN4_HUMAN	CLINT1	Clathrin interactor 1	1685.74	904.095	1261.62	1077.87	1246.38	907.546	1515.08	1563.77
Q14683	Q14683	SMC1A_HUMAN	SMC1A	Structural maintenance of chromosomes protein 1A	2019.85	1825.78	2295.07	2093.72	1917.91	2010.1	2037.57	1978.26
Q14689;Q14689-6	Q14689;Q14689-6;Q14689-5	DIP2A_HUMAN	DIP2A	Disco-interacting protein 2 homolog A	325.223		659.543	228.865		818.714	921.471	786.194
Q14690	Q14690	RRP5_HUMAN	PDCD11	Protein RRP5 homolog	596.63	900.883	1220.21	1108.93	783.587	961.463	918.558	590.717
Q14694;Q14694-2;Q14694-3	Q14694;Q14694-2;Q14694-3	UBP10_HUMAN	USP10	Ubiquitin carboxyl-terminal hydrolase 10	13542.8	15714.9	15290.9	15819.5	146472	128639	124371	121408
Q14697;Q14697-2	Q14697;Q14697-2	GANAB_HUMAN	GANAB	Neutral alpha-glucosidase AB	12750.8	18663.5	13832.5	19196.7	14915.8	19954.6	16400.9	23838.2
Q14728	Q14728	MFS10_HUMAN	MFSD10	Major facilitator superfamily domain-containing protein 10	1092.31	400.513		322.441
Q14746;Q14746-2	Q14746;Q14746-2	COG2_HUMAN	COG2	Conserved oligomeric Golgi complex subunit 2	1309.51	882.902	610.784	931.499	756.22	1320.07	902.111	663.694
Q14790;Q14790-2;Q14790-4;Q14790-7;Q14790-8;Q14790-9	Q14790;Q14790-7;Q14790-9;Q14790-2;Q14790-3;Q14790-4;Q14790-5;Q14790-6;Q14790-8	CASP8_HUMAN	CASP8	Caspase-8	1705.21	1219.8	1805.2	525.451	1481.22	1231.77	1297.04	1324.87
Q147X3;Q147X3-2	Q147X3;Q147X3-2	NAA30_HUMAN	NAA30	N-alpha-acetyltransferase 30	1576.21	2490.22	1976.93	1740.94	1846.21	2008.16	2633.29	1357.77
Q14839;Q14839-2	Q12873;Q14839;Q8TDI0;Q12873-2;Q12873-3;Q14839-2	CHD4_HUMAN	CHD4	Chromodomain-helicase-DNA-binding protein 4	1127.88	840.936	1613.68	2047.62	1267.79	1112.52	1266.11	1053.81
Q14914;Q14914-2	Q14914;Q14914-2	PTGR1_HUMAN	PTGR1	Prostaglandin reductase 1	3621.96	4689.01	3314.7	4514.34	3996	4620.03	3962.09	4466.51
Q14974	Q14974	IMB1_HUMAN	KPNB1	Importin subunit beta-1	2339.37	3105.6	2497.86	2477.57	2932.42	2077.25	2549.35	2352.86
Q14980;Q14980-2	Q14980;Q14980-3;Q14980-4;Q14980-2;Q14980-5	NUMA1_HUMAN	NUMA1	Nuclear mitotic apparatus protein 1	2321.17	2415.33	3205.09	2151.21	2665.69	2339.23	2326.21	2244.43
Q14997	Q14997	PSME4_HUMAN	PSME4	Proteasome activator complex subunit 4	646.765		810.047	454.281	1301.52	456.821	881.659	701.585
Q14CX7;Q14CX7-2	Q14CX7;Q14CX7-2	NAA25_HUMAN	NAA25	N-alpha-acetyltransferase 25, NatB auxiliary subunit	2022.7	1854.63	2010.91	1829.86	2313.22	1647.34	2657.43	1845.33
Q15003	Q15003	CND2_HUMAN	NCAPH	Condensin complex subunit 2	2141.85	1556.63	1801.51	1967.04	2168.94	1791.62	1467.2	1733.58
Q15005	Q15005	SPCS2_HUMAN	SPCS2	Signal peptidase complex subunit 2	3188.53	3916.46	2695.89	3099.04	3181.05	3127.69	3371.41	2695.37
Q15006	Q15006	EMC2_HUMAN	EMC2	ER membrane protein complex subunit 2	1094.84	784.557		590.173			664.335	699.847
Q15008	Q15008;Q15008-2;Q15008-3;Q15008-4	PSMD6_HUMAN	PSMD6	26S proteasome non-ATPase regulatory subunit 6	6738.84	6901.5	6540.9	6111.75	7720.11	4680.61	7720.54	4818.43
Q15018	Q15018	ABRX2_HUMAN	ABRAXAS2	BRISC complex subunit Abraxas 2	1354.07	1686.32	1728.57	1609.9	2378.44	2065.73	1632.46	1878.03
Q15019;Q15019-2	Q15019;Q15019-2	SEPT2_HUMAN	SEPTIN2	Septin-2	9509.23	12188.7	9092.59	11429.1	11358.8	10015	10265.3	11726.8
Q15020	Q15020;Q15020-2;Q15020-4	SART3_HUMAN	SART3	Squamous cell carcinoma antigen recognized by T-cells 3	4093.93	4308.5	4286.25	4756.06	5592.71	4776.24	4944.81	5332.67
Q15021	Q15021	CND1_HUMAN	NCAPD2	Condensin complex subunit 1	1571.96	1237.1	1851.23	1226.94	1801.09	650.52	1830.49	1236.4
Q15024	Q15024	EXOS7_HUMAN	EXOSC7	Exosome complex component RRP42	2984.49	3530.38	2240.06	3361.6	2450.03	3495.37	2670.3	3609.71
Q15029;Q15029-2	Q15029;Q15029-2;Q15029-3	U5S1_HUMAN	EFTUD2	116 kDa U5 small nuclear ribonucleoprotein component	6172.6	7018.55	6183.25	6531.22	6079.04	5684.95	6639.96	6089.63
Q15031	Q15031	SYLM_HUMAN	LARS2	Leucine--tRNA ligase, mitochondrial	605.266		172.327
Q15042;Q15042-3	Q15042;Q15042-3;Q15042-4	RB3GP_HUMAN	RAB3GAP1	Rab3 GTPase-activating protein catalytic subunit	403.891		476.361	713.949	581.122		599.16	552
Q15046;Q15046-2	Q15046;Q15046-2	SYK_HUMAN	KARS1	Lysine--tRNA ligase	12860.9	11936.4	13271.3	12246.9	10135.2	10765.6	11968.2	11890.9
Q15047;Q15047-2;Q15047-3	Q15047;Q15047-2;Q15047-3	SETB1_HUMAN	SETDB1	Histone-lysine N-methyltransferase SETDB1	424.036	317.784	655.855	436.983	481.934	431.402	379.162
Q15054;Q15054-2;Q15054-3	Q15054;Q15054-2;Q15054-3	DPOD3_HUMAN	POLD3	DNA polymerase delta subunit 3	1842.79	2474.41	2180.43	2332.26	2065.28	2620.82	2433.04	1922.02
Q15056;Q15056-2	Q15056;Q15056-2	IF4H_HUMAN	EIF4H	Eukaryotic translation initiation factor 4H	1128.6	633.478	602.964	1116.09	1292.26	584.686		758.838
Q15057	Q15057	ACAP2_HUMAN	ACAP2	Arf-GAP with coiled-coil, ANK repeat and PH domain-containing protein 2	1650.86	1828.66	2519.47	2104.61	2724.87	2532.93	2575.38	2519.89
Q15067;Q15067-2;Q15067-3	Q15067;Q15067-2;Q15067-3	ACOX1_HUMAN	ACOX1	Peroxisomal acyl-coenzyme A oxidase 1	1864.79	781.964	1097.17	1516.89	1185.86	1125.8	1566.38	1498.8
Q15084;Q15084-2;Q15084-3;Q15084-4;Q15084-5	Q15084;Q15084-2;Q15084-3;Q15084-4;Q15084-5	PDIA6_HUMAN	PDIA6	Protein disulfide-isomerase A6	11770.6	9652.52	8881.58	9399.64	9882.28	6362.18	10204.2	9109.78
Q15102	Q15102	PA1B3_HUMAN	PAFAH1B3	Platelet-activating factor acetylhydrolase IB subunit alpha1	25058.8	20219.4	22068.9	21268.5	18177.4	18181.4	17291.9	16076.5
Q15126	Q15126	PMVK_HUMAN	PMVK	Phosphomevalonate kinase	1679.16	1049.17	1706.93	1458.67	1038.27	1103.82	736.024	1327.67
Q15149;Q15149-2;Q15149-3;Q15149-4;Q15149-5;Q15149-6;Q15149-7;Q15149-8;Q15149-9	Q15149;Q15149-2;Q15149-3;Q15149-4;Q15149-5;Q15149-6;Q15149-7;Q15149-8;Q15149-9	PLEC_HUMAN	PLEC	Plectin	4977.01	3988.15	4838.8	4422.7	4095.88	3621.71	4628.41	4177.09
Q15181	Q15181	IPYR_HUMAN	PPA1	Inorganic pyrophosphatase	16307.9	16570.1	14896.4	16594.9	13952.2	16030.9	15043.1	16321.4
Q15185;Q15185-4	Q15185;Q15185-2;Q15185-3;Q15185-4	TEBP_HUMAN	PTGES3	Prostaglandin E synthase 3	16116.4	20632.9	14977	18454.2	15327.9	14405.5	16759.7	16297
Q15208	Q15208;Q9Y2H1;Q9Y2H1-2	STK38_HUMAN	STK38	Serine/threonine-protein kinase 38		1148.17		1868.94	2284.4	1371.58		952.594
Q15233	Q15233;Q15233-2	NONO_HUMAN	NONO	Non-POU domain-containing octamer-binding protein	5037.52	4919.2	5339.93	4822.35	5291.86	5357.63	5665.02	4703.81
Q15257;Q15257-2	Q15257;Q15257-2;Q15257-3	PTPA_HUMAN	PTPA	Serine/threonine-protein phosphatase 2A activator	4192.18	5185.51	5530.74	3842.19	4579.82	3853.51	6488.2	5146.38
Q15262;Q15262-2;Q15262-3;Q15262-4	P28827;Q15262;Q15262-2;Q15262-3;Q15262-4;P28827-2	PTPRK_HUMAN	PTPRK	Receptor-type tyrosine-protein phosphatase kappa	1411.21	1015.28	1147.23	1125.17	941.667	1302.37	1560.46	1022.43
Q15269	Q15269	PWP2_HUMAN	PWP2	Periodic tryptophan protein 2 homolog	1031.62	1280.24	1054.99	1479.01	1337.56	1489.57	1302.16	932.603
Q15286	Q15286;Q15286-2	RAB35_HUMAN	RAB35	Ras-related protein Rab-35	1091.9	1452.29	1082.86	1260.38	913.446	947.824	1047.76	1180.86
Q15291;Q15291-2	Q15291;Q15291-2	RBBP5_HUMAN	RBBP5	Retinoblastoma-binding protein 5	388.655	423.815	383.539	351.809		366.013	298.01	453.542
Q15334	Q15334	L2GL1_HUMAN	LLGL1	Lethal(2) giant larvae protein homolog 1	1678.96	1449.62	1343.3	1559.63	2047.66	1425.58	1867.5	1723.06
Q15363	Q15363	TMED2_HUMAN	TMED2	Transmembrane emp24 domain-containing protein 2	2191.58	2522.88	1493.48	2218.99	1443.07	2023.15	1750.85	1405.65
Q15365	Q15365	PCBP1_HUMAN	PCBP1	Poly(rC)-binding protein 1	66001.4	73735.7	67804.8	69433.5	67296	61298.3	64770.7	66192.2
Q15366-3;Q15366-6	Q15366;Q15366-2;Q15366-3;Q15366-4;Q15366-5;Q15366-6;Q15366-7;Q15366-8	PCBP2_HUMAN	PCBP2	Isoform 3 of Poly(rC)-binding protein 2	62640	61094.9	62270.1	60040.3	64553.3	54937.9	61367.3	57551.7
Q15369	Q15369;Q15369-2	ELOC_HUMAN	ELOC	Elongin-C	3574.83	6493.24	3364.53	4335.36	4004.16	4952.88	3953.89	5196.86
Q15370;Q15370-2	Q15370;Q15370-2	ELOB_HUMAN	ELOB	Elongin-B	4882.26	3756.84	4437.46	4006.6	2609.1	4469.82	3332.35	5406.7
Q15382	Q15382	RHEB_HUMAN	RHEB	GTP-binding protein Rheb	3414.4	3882.63	3807.13	3425.67	3522.24	4386.67	4355.82	4848.91
Q15386	Q15386	UBE3C_HUMAN	UBE3C	Ubiquitin-protein ligase E3C	1287.41	1740.81	2116.77	1177.99	4249.14	4030.93	3760.34	3891.19
Q15392;Q15392-2	Q15392;Q15392-2	DHC24_HUMAN	DHCR24	Delta(24)-sterol reductase	1209.6	1990.23	1822.28	2359.7	1898.98	2806.54	2337.34	2251.77
Q15393	Q15393	SF3B3_HUMAN	SF3B3	Splicing factor 3B subunit 3	10760.8	11087.5	10683.5	11046.8	10378.5	11392.6	9431.8	11071.4
Q15404	Q15404;Q15404-2	RSU1_HUMAN	RSU1	Ras suppressor protein 1	944.827	735.836	640.345	404.691		309.034	902.44	824.144
Q15418;Q15418-2;Q15418-3;Q15418-4	Q15418;Q15418-2;Q15418-3;Q15418-4	KS6A1_HUMAN	RPS6KA1	Ribosomal protein S6 kinase alpha-1	1229.07	995.566	1002.47	1071.3	947.351	802.913	1693.92	660.217
Q15428	Q15428	SF3A2_HUMAN	SF3A2	Splicing factor 3A subunit 2	1109.3	1606.02	1322.5	1493.27	1132.18	1621	1582.97	2159.87
Q15435;Q15435-2	Q15435;Q15435-2;Q15435-3;Q15435-4;Q15435-5	PP1R7_HUMAN	PPP1R7	Protein phosphatase 1 regulatory subunit 7	2939.42	2696.45	2263.83	2233.16	2066.26	2222.68	2269.86	2751.36
Q15436	Q15436	SC23A_HUMAN	SEC23A	Protein transport protein Sec23A	6171.88	7461.68	6972.99	7107.18	7262.68	6514.39	6486.59	7524.18
Q15437	Q15437	SC23B_HUMAN	SEC23B	Protein transport protein Sec23B	6712.3	7178.62	8226.55	7080.95	8095.86	7225.01	7502.56	8813.12
Q15459	Q15459	SF3A1_HUMAN	SF3A1	Splicing factor 3A subunit 1	619.978	271.458		387.861	698.811		487.651	327.753
Q15477	Q15477	SKI2_HUMAN	SKIC2	Superkiller complex protein 2	1705.79	2008.1	1859.06	1699.82	1799.17	2153.97	1396.51	2384.95
Q15645	Q15645	PCH2_HUMAN	TRIP13	Pachytene checkpoint protein 2 homolog	3592.49	3421.43	4044.95	3978.87	4073.03	3598.06	3959.66	2894.69
Q15648;Q15648-3	Q15648;Q15648-3	MED1_HUMAN	MED1	Mediator of RNA polymerase II transcription subunit 1	487.255		400.508	492.575		534.5	491.321	554.49
Q15654	Q15654	TRIP6_HUMAN	TRIP6	Thyroid receptor-interacting protein 6	1570.2	1739.6	1376.58	1547.23	1946.51	2323.26	1930.64	2062.44
Q15691	Q15691	MARE1_HUMAN	MAPRE1	Microtubule-associated protein RP/EB family member 1	1582.98	1470.68	1280.83	1649.14	1494.14	1168.91	1799.29	1460.51
Q15717;Q15717-2	Q15717;Q15717-2	ELAV1_HUMAN	ELAVL1	ELAV-like protein 1	10016.7	8523.36	10229.5	9861.23	10275.5	9853.76	9370.63	8915.48
Q15738	Q15738	NSDHL_HUMAN	NSDHL	Sterol-4-alpha-carboxylate 3-dehydrogenase, decarboxylating	7201.49	7905.99	9735.39	7421.69	8421.34	7926.24	7574.58	7361.6
Q15742;Q15742-3	Q13506;Q15742;Q15742-2;Q15742-3;Q13506-2	NAB2_HUMAN	NAB2	NGFI-A-binding protein 2	2970.08	2484.36	2911.66	2443.05	2216.2	2465.58	2917.51	2263.36
Q15750;Q15750-2	Q15750;Q15750-2	TAB1_HUMAN	TAB1	TGF-beta-activated kinase 1 and MAP3K7-binding protein 1	611.34	658.233	574.386	227.62	500.505	478.521	521.266	580.332
Q15758	Q15758	AAAT_HUMAN	SLC1A5	Neutral amino acid transporter B(0)	4845.46	5896.93	5378.64	5139.49	6086.26	4718.21	5248.64	4057.96
Q15773	Q15773	MLF2_HUMAN	MLF2	Myeloid leukemia factor 2	1241.54	1399.48	999.033	877.859	1105.11	1685.43	1418.15	1115.76
Q15813;Q15813-2	Q15813;Q15813-2	TBCE_HUMAN	TBCE	Tubulin-specific chaperone E	234.974		627.985	250.136	454.757	149.98	344.143	435.564
Q15814	Q15814	TBCC_HUMAN	TBCC	Tubulin-specific chaperone C	1843.94	1991.24	1346.47	2235.55	1900.89	2424.95	1884.3	2951.85
Q15819	Q15819	UB2V2_HUMAN	UBE2V2	Ubiquitin-conjugating enzyme E2 variant 2	2848.32	3036.29	2355.84	2009.41	1935.99	2378.47	2567.57	3700.11
Q15907	P62491;Q15907;P62491-2;Q15907-2	RB11B_HUMAN	RAB11B	Ras-related protein Rab-11B	17039.3	14967.2	14682.3	15316.7	13067.7	16760.3	15000.2	11352.4
Q16143	Q16143	SYUB_HUMAN	SNCB	Beta-synuclein					371.7
Q16181;Q16181-2	Q16181;Q6ZU15;Q16181-2	SEPT7_HUMAN	SEPTIN7	Septin-7	8085.83	7512.29	6886.42	7327.14	7627.25	7488.49	7297.84	6922.21
Q16186	Q16186	ADRM1_HUMAN	ADRM1	Proteasomal ubiquitin receptor ADRM1	1989.98	3617.07	4802.25	4103.58	3908.36	4633.43	4109.34	4559.68
Q16204	Q16204	CCDC6_HUMAN	CCDC6	Coiled-coil domain-containing protein 6	1703.18	1516.96	1407.03	1226.65	895.676	1158.62	870.9	896.381
Q16222;Q16222-2;Q16222-3	Q16222;Q3KQV9;Q16222-2;Q16222-3	UAP1_HUMAN	UAP1	UDP-N-acetylhexosamine pyrophosphorylase	2490.31	2042.49	2111.44	2594.21	2653.84	2894.37	2527.71	2628.15
Q16401;Q16401-2	Q16401;Q16401-2	PSMD5_HUMAN	PSMD5	26S proteasome non-ATPase regulatory subunit 5	2788.59	2772.96	2892.26	2969.93	2880.38	2324.71	3024.7	2980.31
Q16512;Q16512-2	Q16512;Q16512-2	PKN1_HUMAN	PKN1	Serine/threonine-protein kinase N1	2248.43	2942.62	2299.41	3530.51	2912.52	4350.94	2348.95	2784.26
Q16513;Q16513-2;Q16513-3	Q16513;Q16513-2;Q16513-3	PKN2_HUMAN	PKN2	Serine/threonine-protein kinase N2	1613.98	2378.8	1924.89	1749.34	1770.52	1890.2	3234.22	2119.35
Q16531	Q16531	DDB1_HUMAN	DDB1	DNA damage-binding protein 1	8975.06	11945.1	10233.8	12228	9621.29	12833.5	9555.84	12389.7
Q16540	Q16540	RM23_HUMAN	MRPL23	Large ribosomal subunit protein uL23m	1189.84	1319.37	879.568	1104.43	1453.41	968.685	1522.48	1050.42
Q16543	Q16543	CDC37_HUMAN	CDC37	Hsp90 co-chaperone Cdc37	8958.76	7740.95	7689.41	6456.75	6787.86	5929.84	7962.94	5711.49
Q16555;Q16555-2	Q14194;Q16555;Q14194-2;Q16555-2	DPYL2_HUMAN	DPYSL2	Dihydropyrimidinase-related protein 2	571.856	857.044	389.541	863.305	593.482		670.537	1074.86
Q16563;Q16563-2	Q16563;Q16563-2	SYPL1_HUMAN	SYPL1	Synaptophysin-like protein 1	7032.92	8678.33	6698.93	7371.23	7379.69	6648.55	7023.58	6282.14
Q16576	Q16576;Q16576-2	RBBP7_HUMAN	RBBP7	Histone-binding protein RBBP7	7684.04	11043.6	7298.56	10819.3	6705.78	7861.53	6803.7	9265.18
Q16629;Q16629-2;Q16629-3;Q16629-4	Q16629;Q16629-2;Q16629-3;Q16629-4	SRSF7_HUMAN	SRSF7	Serine/arginine-rich splicing factor 7	4166.54	3653.84	3099.68	3498.33	3717.31	4554.97	3903.61	3365.31
Q16643;Q16643-2;Q16643-3	Q16643;Q16643-2;Q16643-3	DREB_HUMAN	DBN1	Drebrin	1380.51	1226.08	1447.92	906.958	972.594	811.187	1111.59	905.384
Q16658	Q16658	FSCN1_HUMAN	FSCN1	Fascin	4535.58	5655.02	4735.55	5670.71	5348.05	5346.65	4640.68	5816.84
Q16698;Q16698-2	Q16698;Q16698-2	DECR_HUMAN	DECR1	2,4-dienoyl-CoA reductase [(3E)-enoyl-CoA-producing], mitochondrial	11349	12578.5	8911.41	16720	6508.08	10171.3	8384.14	9948.97
Q16706	Q16706	MA2A1_HUMAN	MAN2A1	Alpha-mannosidase 2	1152.47	753.411	1087.97	964.181	1695.02	1785.47	1420.53	1353.84
Q16719	Q16719;Q16719-2	KYNU_HUMAN	KYNU	Kynureninase	8999.74	11352.3	8720.75	11137.7	8403.8	10585.5	7774.02	10804.4
Q16762	Q16762	THTR_HUMAN	TST	Thiosulfate sulfurtransferase	1332.91	1528.32	1751.6	1118.68	929.347	1235.12	1406.17	1193.82
Q16763	Q16763	UBE2S_HUMAN	UBE2S	Ubiquitin-conjugating enzyme E2 S	824.451	765.01	1449.75	432.775	938.438	1176.98	473.596	680.793
Q16775;Q16775-2	Q16775;Q16775-2	GLO2_HUMAN	HAGH	Hydroxyacylglutathione hydrolase, mitochondrial	1004.77	1113.55	754.963	764.188	1224.33	916.871	1158.51	1087.02
Q16787;Q16787-3	Q16787;Q16787-1;Q16787-3;Q16787-4	LAMA3_HUMAN	LAMA3	Laminin subunit alpha-3					669.892		555.038
Q16795	Q16795	NDUA9_HUMAN	NDUFA9	NADH dehydrogenase [ubiquinone] 1 alpha subcomplex subunit 9, mitochondrial	545.592	820.731	1117.5	656.174		975.911	862.553	767.392
Q16822	Q16822;Q16822-2;Q16822-3	PCKGM_HUMAN	PCK2	Phosphoenolpyruvate carboxykinase [GTP], mitochondrial	2526.79	2143.84	2334.77	2173.42	1800.29	1670.33	1977.88	2220.33
Q16836;Q16836-2;Q16836-3	Q16836;Q16836-2;Q16836-3	HCDH_HUMAN	HADH	Hydroxyacyl-coenzyme A dehydrogenase, mitochondrial	14703.8	14845.4	15308.5	16556.6	12379.7	17301.4	13984.9	19221.3
Q16850;Q16850-2	Q16850;Q16850-2	CP51A_HUMAN	CYP51A1	Lanosterol 14-alpha demethylase	4936.25	4009.62	5790.53	3887.84	5160.26	4206.1	3961.77	4463.61
Q16851;Q16851-2	Q16851;Q16851-2	UGPA_HUMAN	UGP2	UTP--glucose-1-phosphate uridylyltransferase	12626.3	11831.3	11131.1	11603.3	10339.6	11406.4	12987.1	10290.3
Q16881;Q16881-2;Q16881-3;Q16881-4;Q16881-5;Q16881-6	Q16881;Q16881-4;Q16881-5;Q16881-2;Q16881-3;Q16881-6;Q16881-7	TRXR1_HUMAN	TXNRD1	Thioredoxin reductase 1, cytoplasmic	2123.17	2532.78	1789.17	2462.51	1238.83	2144.89	1740.44	1903.17
Q16891;Q16891-2;Q16891-3;Q16891-4	Q16891;Q16891-2;Q16891-3;Q16891-4	MIC60_HUMAN	IMMT	MICOS complex subunit MIC60	1327.56	1555.44	1740.38	1701.68	1007.17	1177.88	1629.45	1397.54
Q17RB8;Q17RB8-2	Q17RB8;Q17RB8-2	LONF1_HUMAN	LONRF1	LON peptidase N-terminal domain and RING finger protein 1	592.688	750.094	495.827	482.508	477.368		655.306	290.23
Q1KMD3	Q1KMD3	HNRL2_HUMAN	HNRNPUL2	Heterogeneous nuclear ribonucleoprotein U-like protein 2	10108.5	8937.73	10604.5	8417.08	7920.39	9547.42	8607.94	7204.97
Q29RF7	Q29RF7	PDS5A_HUMAN	PDS5A	Sister chromatid cohesion protein PDS5 homolog A	448.769	584.336	815.128	994.906	989.291	698.495	739.073	1003.91
Q2M2I8;Q2M2I8-2;Q9NSY1;Q9NSY1-2;Q9NSY1-3	Q2M2I8;Q9NSY1;Q2M2I8-2;Q9NSY1-2;Q9NSY1-3	AAK1_HUMAN;BMP2K_HUMAN	AAK1;BMP2K	AP2-associated protein kinase 1		235.556		202.743	185.73			262.008
Q2M389	Q2M389;Q2M389-2	WASC4_HUMAN	WASHC4	WASH complex subunit 4	984.374	1244	974.991	868.356	1052.92	1075.41	1086.86	1398.02
Q2NL82	Q2NL82	TSR1_HUMAN	TSR1	Pre-rRNA-processing protein TSR1 homolog	561.652	1337.7	871.721	1096.29	963.562	764.35	986.476	740.585
Q2T9J0;Q2T9J0-2	Q2T9J0;Q2T9J0-2	TYSD1_HUMAN	TYSND1	Peroxisomal leader peptide-processing protease	2734.48	2462.08	1993.99	2345.57	1212.14	1152.78	1348.72	1295.5
Q2TAL8	Q2TAL8	QRIC1_HUMAN	QRICH1	Transcriptional regulator QRICH1	604.238	625.188	887.088	1006.29	987.531	627.754	1044.44	1148.25
Q2TAY7	Q2TAY7	SMU1_HUMAN	SMU1	WD40 repeat-containing protein SMU1	1190.92	1943.9	821.91	2042.05	1520.56	1996.98	1009.41	2135.02
Q2VPK5;Q2VPK5-3;Q2VPK5-5	Q2VPK5;Q2VPK5-3;Q2VPK5-5	CTU2_HUMAN	CTU2	Cytoplasmic tRNA 2-thiolation protein 2	588.465	798.917	1054.89	1329.96	1098.12	1088.23	1844.47	1014.47
Q32P41	Q32P41	TRM5_HUMAN	TRMT5	tRNA (guanine(37)-N1)-methyltransferase	4014.07	4191.04	3431.1	3339.51	3295.97	3999.29	3771.06	3689.68
Q32P44	Q32P44;Q32P44-2	EMAL3_HUMAN	EML3	Echinoderm microtubule-associated protein-like 3	1239.92	1599.56	1198.68	1391.32	1881.7	1592.83	1933.51	1348.92
Q3B726	Q3B726	RPA43_HUMAN	POLR1F	DNA-directed RNA polymerase I subunit RPA43				253.681
Q3L8U1;Q3L8U1-2;Q3L8U1-3	O14646;O14647;Q3L8U1;Q8TD26;Q9HCK8;Q9P2D1;Q3L8U1-3;O14646-2;O14647-2;Q3L8U1-2;Q9HCK8-2	CHD9_HUMAN	CHD9	Chromodomain-helicase-DNA-binding protein 9		1674.29	1883.73	1471.44	2082.54	1202.14	2034.97	1182.05
Q3LXA3	Q3LXA3;Q3LXA3-2	TKFC_HUMAN	TKFC	Triokinase/FMN cyclase	1787.51	1441.75	1554.84	1801.34	1810.49	1343.49	2193.6	1710.51
Q3MHD2;Q3MHD2-2	Q3MHD2;Q3MHD2-2	LSM12_HUMAN	LSM12	Protein LSM12	180365	100433	93427.2	67411.8	164410	91980.9	108163	69569.7
Q3SXM5;Q3SXM5-2	Q3SXM5;Q3SXM5-2	HSDL1_HUMAN	HSDL1	Inactive hydroxysteroid dehydrogenase-like protein 1	1343.43	2135.99	2243.78	2931.51	2754.85	1975.06	2754.62	2338.98
Q3YBR2	Q3YBR2	TBRG1_HUMAN	TBRG1	Transforming growth factor beta regulator 1					4734.68
Q3YEC7;Q3YEC7-2;Q3YEC7-3	Q3YEC7;Q3YEC7-3;Q3YEC7-2;Q3YEC7-4;Q3YEC7-5;Q3YEC7-6	RABL6_HUMAN	RABL6	Rab-like protein 6	2729.52	2081.45	2202.17	3293.42	1707.55	3634.82	2043.77	2867.58
Q3ZCQ8;Q3ZCQ8-2	Q3ZCQ8;Q3ZCQ8-2;Q3ZCQ8-3	TIM50_HUMAN	TIMM50	Mitochondrial import inner membrane translocase subunit TIM50	4554.51	2795.18	4718.63	3074.69	2573.35	3525.42	3447.76	2407.73
Q3ZCW2	Q3ZCW2	LEGL_HUMAN	LGALSL	Galectin-related protein	170.32	1049.02	765.204	927.685		808.245	478.511	788.649
Q49AR2	Q49AR2;Q49AR2-2;Q49AR2-3	CE022_HUMAN	C5orf22	UPF0489 protein C5orf22	2235.28	1080.76	1572.98	1396.9	1515.41	1929.9	919.761	1331.71
Q4G0F5	Q4G0F5	VP26B_HUMAN	VPS26B	Vacuolar protein sorting-associated protein 26B	752.857	1072.18	483.546	638.143	965.771	338.915		646.641
Q4G0J3;Q4G0J3-3	Q4G0J3;Q4G0J3-2;Q4G0J3-3	LARP7_HUMAN	LARP7	La-related protein 7	720.53	928.021	920.552	625.046	765.445	895.114	1504.26	848.89
Q4G0N4	Q4G0N4;Q4G0N4-2;Q4G0N4-3	NAKD2_HUMAN	NADK2	NAD kinase 2, mitochondrial	4624.34	3568.02	4661.9	3812.71	3678.48	4212.15	3630.95	4231.43
Q4G176	Q4G176	ACSF3_HUMAN	ACSF3	Malonate--CoA ligase ACSF3, mitochondrial	1138	1029.95	1230.18	1790.69	1319.27	1444.96	1365.7	1160.3
Q4ZG55	Q4ZG55	GREB1_HUMAN	GREB1	Protein GREB1	2430.3	3477.75	3059.92	2911.36	2447.27	2949.23	3622.76	3020.05
Q504Q3;Q504Q3-2;Q504Q3-3	Q504Q3;Q504Q3-2;Q504Q3-3	PAN2_HUMAN	PAN2	PAN2-PAN3 deadenylation complex catalytic subunit PAN2	470.656	549.463	582.676	676.818	1037.43	749.448	744.621	816.655
Q53EL6;Q53EL6-2	Q53EL6;Q53EL6-2	PDCD4_HUMAN	PDCD4	Programmed cell death protein 4	4006.83	5278.78	3011.07	3648.48	4065.41	1676.49	4002.46	2427.47
Q53FT3	Q53FT3	HIKES_HUMAN	HIKESHI	Protein Hikeshi	2939.54	3058.88	2728.2	3026.33	2463.38	2582.5	2599.21	2501.36
Q53GA4	Q53GA4	PHLA2_HUMAN	PHLDA2	Pleckstrin homology-like domain family A member 2	423.402	383.262	427.151	443.196	921.505	518.237	832.266	723.346
Q53GS9;Q53GS9-2	Q53GS9;Q53GS9-2;Q53GS9-3	SNUT2_HUMAN	USP39	U4/U6.U5 tri-snRNP-associated protein 2	834.212	1437.51	710.799	1286.17	858.347	1391.54	1012.63	830.271
Q53H12	Q53H12	AGK_HUMAN	AGK	Acylglycerol kinase, mitochondrial	1029.83	700.413	947.794	1168.25	1303.39	1267.43	1064.32	1264.22
Q53H96;Q53H96-2	Q53H96;Q53H96-2	P5CR3_HUMAN	PYCR3	Pyrroline-5-carboxylate reductase 3	6076.54	6654.18	6495.17	7149.26	8850.44	10335.6	8931.2	8482.12
Q562R1	Q562R1	ACTBL_HUMAN	ACTBL2	Beta-actin-like protein 2	1776.34						1656.72	1207.52
Q58FF6	Q58FF6	H90B4_HUMAN	HSP90AB4P	Putative heat shock protein HSP 90-beta 4	2737.68	1074.07	1719.74	1347.99	1250.77	1477.31	1288.85	1280.36
Q5D862	Q5D862	FILA2_HUMAN	FLG2	Filaggrin-2	351.312	2060.68		411.134		357.392		207.007
Q5GLZ8;Q5GLZ8-2;Q5GLZ8-3;Q5GLZ8-6	Q5GLZ8;Q5GLZ8-2;Q5GLZ8-3;Q5GLZ8-6	HERC4_HUMAN	HERC4	Probable E3 ubiquitin-protein ligase HERC4	1681.47	1440.85	1898.53	2218.14	2159.39	1729.19	2051.73	2073.13
Q5H9R7;Q5H9R7-2;Q5H9R7-5;Q5H9R7-6	Q5H9R7;Q5H9R7-2;Q5H9R7-5;Q5H9R7-6	PP6R3_HUMAN	PPP6R3	Serine/threonine-protein phosphatase 6 regulatory subunit 3	2875.91	2939.93	2720.91	3390.79	2921.24	3377.02	3185.69	3796.89
Q5JPH6;Q5JPH6-2	Q5JPH6;Q5JPH6-2	SYEM_HUMAN	EARS2	Probable glutamate--tRNA ligase, mitochondrial	555.262		610.67	634.723	1064.37	774.792	999.06	365.582
Q5JRX3;Q5JRX3-2	Q5JRX3;Q5JRX3-2	PREP_HUMAN	PITRM1	Presequence protease, mitochondrial	1947.58	1699.36	1841.57	1593.07	1904.78	1808.81	1737.9	2340.32
Q5JSH3;Q5JSH3-2;Q5JSH3-3;Q5JSH3-4	Q5JSH3;Q5JSH3-2;Q5JSH3-3;Q5JSH3-4	WDR44_HUMAN	WDR44	WD repeat-containing protein 44				1914.06		1768.43		982.499
Q5JTZ9	Q5JTZ9	SYAM_HUMAN	AARS2	Alanine--tRNA ligase, mitochondrial	652.398	886.217	1293.18	885.072	892.476	950.969	865.646	1005.28
Q5JVF3;Q5JVF3-2;Q5JVF3-3;Q5JVF3-4	Q5JVF3;Q5JVF3-2;Q5JVF3-3;Q5JVF3-4	PCID2_HUMAN	PCID2	PCI domain-containing protein 2	1779.41	1642.45	1456.11	1126.79	1816.75	1558.63	1906.78	1631.13
Q5MNZ6	Q5MNZ6	WIPI3_HUMAN	WDR45B	WD repeat domain phosphoinositide-interacting protein 3	594.72		1293.56	1261.34	1673.06	1085.01	1242	920.773
Q5RKV6	Q5RKV6	EXOS6_HUMAN	EXOSC6	Exosome complex component MTR3			642.44			421.179	954.972
Q5SRE5	Q5SRE5;Q5SRE5-2	NU188_HUMAN	NUP188	Nucleoporin NUP188						551.174	396.514	971.079
Q5SRH9-4;Q5SRH9-5;Q5SRH9-6	Q5SRH9;Q5SRH9-2;Q5SRH9-4;Q5SRH9-5;Q5SRH9-6	TT39A_HUMAN	TTC39A	Isoform 4 of Tetratricopeptide repeat protein 39A	1389.78	1568.69	1681.52	1363.58	1592.67	1564.42	1322.98	1767.54
Q5SSJ5;Q5SSJ5-2;Q5SSJ5-3	Q5SSJ5;Q5SSJ5-2;Q5SSJ5-3	HP1B3_HUMAN	HP1BP3	Heterochromatin protein 1-binding protein 3	911.887	470.171	1311.25	400.508	651.54	594.717	1132.35	563.629
Q5SWX8;Q5SWX8-2;Q5SWX8-3;Q5SWX8-4	Q5SWX8;Q5SWX8-2;Q5SWX8-3;Q5SWX8-4	ODR4_HUMAN	ODR4	Protein odr-4 homolog	1096.86	561.191	573.835	695.043	637.238	752.626	848.326	954.111
Q5SZK8	Q5SZK8;Q5SZK8-2	FREM2_HUMAN	FREM2	FRAS1-related extracellular matrix protein 2	6178.94	6068.38	7198.74	8841.26	6447.83	8078.98	6121.54	7322.34
Q5T0W9	Q5T0W9	FA83B_HUMAN	FAM83B	Protein FAM83B	1602.68	1869.78	1625.65	1932.76	1984	1925.08	1727.29	1518.14
Q5T1V6;Q5T1V6-2	Q5T1V6;Q5T1V6-2	DDX59_HUMAN	DDX59	Probable ATP-dependent RNA helicase DDX59	848.035	840.49	880.695	595.648	720.554	1022.87	1133.8	1066.44
Q5T2T1	Q5T2T1	MPP7_HUMAN	MPP7	MAGUK p55 subfamily member 7	1714.07	5500.19	2615.67	4238.98	4460.35	3484.34	3577.47	4590.13
Q5T4S7;Q5T4S7-2;Q5T4S7-3;Q5T4S7-4	Q5T4S7;Q5T4S7-2;Q5T4S7-3;Q5T4S7-4;Q5T4S7-5	UBR4_HUMAN	UBR4	E3 ubiquitin-protein ligase UBR4	3861.45	3642.5	3667.83	4009.73	4143.79	4174.29	3822.33	4066.96
Q5T6V5	Q5T6V5	QNG1_HUMAN	QNG1	Queuosine 5'-phosphate N-glycosylase/hydrolase	5295.65	5221.29	5778.21	5314.3	5528.92	5045	5508.15	5512.88
Q5T8I3;Q5T8I3-2	Q5T8I3;Q5T8I3-2	EEIG2_HUMAN	EEIG2	EEIG family member 2	2195.14		2807.79	2745.23	2871.32	2517.67	1561.84	1922.57
Q5TA45;Q5TA45-2;Q5TA45-3;Q5TA45-4;Q5TA45-5	Q5TA45;Q5TA45-2;Q5TA45-3;Q5TA45-4;Q5TA45-5	INT11_HUMAN	INTS11	Integrator complex subunit 11	683.367	970.24	1984.14	1631.43	1633.23	1980.58	2003.21	1301.02
Q5TAQ9;Q5TAQ9-2	Q5TAQ9;Q5TAQ9-2	DCAF8_HUMAN	DCAF8	DDB1- and CUL4-associated factor 8	778.437	1254.89	1354.26	1479.55	1771.3	2461.79	1971.62	1975.98
Q5TC63;Q5TC63-2;Q5TC63-3	Q5TC63;Q5TC63-2;Q5TC63-3	GRTP1_HUMAN	GRTP1	Growth hormone-regulated TBC protein 1							745.705
Q5TDH0;Q5TDH0-2;Q5TDH0-3	Q5TDH0;Q5TDH0-2;Q5TDH0-3	DDI2_HUMAN	DDI2	Protein DDI1 homolog 2	1728.7	1689.01	1044.16	1734.25	1510	1207.13	1596.37	1932.75
Q5TFE4	Q5TFE4;Q5TFE4-2	NT5D1_HUMAN	NT5DC1	5'-nucleotidase domain-containing protein 1	1714.49	2009.24	1946.81	1786.67	1735.43	1950.09	1954.33	1774.01
Q5VIR6	Q5VIR6;Q5VIR6-1;Q5VIR6-2;Q5VIR6-3	VPS53_HUMAN	VPS53	Vacuolar protein sorting-associated protein 53 homolog		1712.14	920.681	841.456	256.865	444.83	473.721	688.442
Q5VT06	Q5VT06	CE350_HUMAN	CEP350	Centrosome-associated protein 350	1048.88	1304.89	1598.83	1302.17	1339.34	1902.3	1088.16	1473.08
Q5VT25;Q5VT25-2;Q5VT25-3;Q5VT25-4;Q5VT25-5;Q5VT25-6	Q5VT25;Q5VT25-2;Q5VT25-3;Q5VT25-4;Q5VT25-5;Q5VT25-6	MRCKA_HUMAN	CDC42BPA	Serine/threonine-protein kinase MRCK alpha	12073.3	8742.62	9548.14		10102.2	11338.3	9892.91	10204.8
Q5VTR2	O75150;Q5VTR2;O75150-3;O75150-4	BRE1A_HUMAN	RNF20	E3 ubiquitin-protein ligase BRE1A	1374.6	1285.2	1036.61	825.706	912.142	846.924	1266.28	1224.88
Q5VV17	Q5VV17	OTUD1_HUMAN	OTUD1	OTU domain-containing protein 1					1065.13			479.608
Q5VWZ2	Q5VWZ2;Q5VWZ2-2	LYPL1_HUMAN	LYPLAL1	Lysophospholipase-like protein 1	5797.05	7035.49	5157.22	6771.74	5182.17	5601.2	6370.98	6074.14
Q5VYK3	Q5VYK3	ECM29_HUMAN	ECPAS	Proteasome adapter and scaffold protein ECM29	4465.13	4085.53	4374.77	4677.37	3889.64	3268.74	4466.24	4483.65
Q5VZM2;Q5VZM2-2;Q7L523	Q5VZM2;Q7L523;Q5VZM2-2	RRAGA_HUMAN;RRAGB_HUMAN	RRAGA;RRAGB	Ras-related GTP-binding protein B	2773.11	2243.42	2569.53	2638.66	3035.28	3497.56	2620.35	2753.34
Q5W0V3;Q5W0V3-2	Q5W0V3;Q5W0V3-2	FHI2A_HUMAN	FHIP2A	FHF complex subunit HOOK interacting protein 2A	754.517		695.349	589.817				753.888
Q5W111	Q5W111;Q5W111-2	SPRY7_HUMAN	SPRYD7	SPRY domain-containing protein 7	2385.34	2706.56	1723.31	1973.64	2050.83	2416.31	1919.05	1613.73
Q5XPI4;Q5XPI4-2	Q5XPI4;Q5XPI4-2	RN123_HUMAN	RNF123	E3 ubiquitin-protein ligase RNF123	88935.5	128120	83957.8	126293	107996	70750.3	79431.6	121526
Q63HN8;Q63HN8-4	Q63HN8;Q63HN8-4	RN213_HUMAN	RNF213	E3 ubiquitin-protein ligase RNF213	2412	2494.74	2829.27	2540.38	2338.98	2733	2725.16	2758.36
Q658Y4	Q658Y4	F91A1_HUMAN	FAM91A1	Protein FAM91A1	3910.22	4272.93	4331.6	3965.66	3936.72	4074.59	3683.04	3447.46
Q66K14;Q66K14-2	Q66K14;Q66K14-2	TBC9B_HUMAN	TBC1D9B	TBC1 domain family member 9B	1728.36	1344.6	2089.9	1586.23	1694.03	1565.86	2106.14	1704.71
Q66K74;Q66K74-2	Q66K74;Q66K74-2	MAP1S_HUMAN	MAP1S	Microtubule-associated protein 1S	1122.14	587.608	957.875	572.165	888.47	1074.35	896.996	867.945
Q66PJ3;Q66PJ3-1;Q66PJ3-10;Q66PJ3-2;Q66PJ3-3;Q66PJ3-4;Q66PJ3-7;Q66PJ3-9	Q66PJ3;Q66PJ3-4;Q66PJ3-1;Q66PJ3-10;Q66PJ3-2;Q66PJ3-3;Q66PJ3-7;Q66PJ3-9	AR6P4_HUMAN	ARL6IP4	ADP-ribosylation factor-like protein 6-interacting protein 4	249.826	520.818	267.425	685.142		556.206	199.02	353.381
Q68CP9;Q68CP9-3	Q68CP9;Q68CP9-3	ARID2_HUMAN	ARID2	AT-rich interactive domain-containing protein 2	523.724	507.761	847.939	808.147	942.029		839.686	437.689
Q68DU8;Q96CX2	Q96CX2;Q68DU8	KCD12_HUMAN;KCD16_HUMAN	KCTD12;KCTD16	BTB/POZ domain-containing protein KCTD16	710.88		532.003			822.683	439.515	555.555
Q68DV7;Q68DV7-2;Q68DV7-3;Q68DV7-4	Q68DV7;Q68DV7-2;Q68DV7-3;Q68DV7-4	RNF43_HUMAN	RNF43	E3 ubiquitin-protein ligase RNF43						273.631	231.941
Q69YN2;Q69YN2-3	Q69YN2;Q69YN2-3	C19L1_HUMAN	CWF19L1	CWF19-like protein 1	2096.29	2318.78	2111.71	2522.13	2278.45	2388.62	2124.34	2382.18
Q6AI08	Q6AI08	HEAT6_HUMAN	HEATR6	HEAT repeat-containing protein 6	2375.09	2401.68	2595.02	1773.27	2711.18	2187.86	2949.35	2527.41
Q6DD88	Q6DD88	ATLA3_HUMAN	ATL3	Atlastin-3	778.247	1311.32	1047.77	1127.53	993.395	1245.97	1360.36	1172.42
Q6DKI1;Q6DKI1-2	Q6DKI1;Q6DKI1-2	RL7L_HUMAN	RPL7L1	Ribosomal protein uL30-like	447.357	835.44	1558.65	1546.4	650.342	1710.63	1195.68	863.57
Q6DT37	Q6DT37	MRCKG_HUMAN	CDC42BPG	Serine/threonine-protein kinase MRCK gamma	470.645		392.3	282.54		326.716	284.078	341.49
Q6FI81;Q6FI81-3	Q6FI81;Q6FI81-2;Q6FI81-3	CPIN1_HUMAN	CIAPIN1	Anamorsin	3076.98	3253.6	3795.95	3421.9	2915.17	3442.21	3192.7	3086.59
Q6FIF0;Q6FIF0-2	Q6FIF0;Q6FIF0-2	ZFAN6_HUMAN	ZFAND6	AN1-type zinc finger protein 6	525.073			601.276	1212.4	2120.65	782.272	1467.27
Q6GMV2	Q6GMV2	SMYD5_HUMAN	SMYD5	Histone-lysine N-trimethyltransferase SMYD5	2993.35	2595.11	3450.64	2495.21	3533.66	3509.74	3576.85	2976.36
Q6GQQ9;Q6GQQ9-2	Q6GQQ9;Q6GQQ9-2	OTU7B_HUMAN	OTUD7B	OTU domain-containing protein 7B	760.451	2299.43	1104.34	1594.62	11507.6	13758.9	10519.1	11052.7
Q6GYQ0-5	Q6GYQ0;Q6GYQ0-2;Q6GYQ0-4;Q6GYQ0-5;Q6GYQ0-6;Q6GYQ0-7	RGPA1_HUMAN	RALGAPA1	Isoform 5 of Ral GTPase-activating protein subunit alpha-1	104.29	449.082	203.41	412.485			337.378	381.854
Q6IA69	Q6IA69	NADE_HUMAN	NADSYN1	Glutamine-dependent NAD(+) synthetase	2287.74	1786.02	2096.81	2401.17	2936.48	2760.08	2420.51	2212.86
Q6IA86;Q6IA86-2;Q6IA86-3;Q6IA86-4;Q6IA86-5;Q6IA86-6;Q6IA86-7	Q6IA86;Q6IA86-2;Q6IA86-3;Q6IA86-4;Q6IA86-5;Q6IA86-6;Q6IA86-7	ELP2_HUMAN	ELP2	Elongator complex protein 2	2177.65	1700.67	2469.8	3110.4	2360.08	2908.46	2488.86	2641.63
Q6IAN0	Q6IAN0	DRS7B_HUMAN	DHRS7B	Dehydrogenase/reductase SDR family member 7B	1389.56	1527.13	1402.41	1257.84	1659.91	1581.47	1270.11	1350.48
Q6IN85;Q6IN85-2	Q6IN85;Q6IN85-2;Q6IN85-4	P4R3A_HUMAN	PPP4R3A	Serine/threonine-protein phosphatase 4 regulatory subunit 3A	1739.54	1283.04	1408.46	1246.1	1467.43	1405.67	1910.89	1235.08
Q6IQ22	Q6IQ22	RAB12_HUMAN	RAB12	Ras-related protein Rab-12	750.23	827.227	680.8	918.959	789.937	835.572	735.036	714.612
Q6IQ26;Q6IQ26-2;Q6ZUT9;Q6ZUT9-2	Q6IQ26;Q6ZUT9;Q6ZUT9-2;Q6IQ26-2	DEN5A_HUMAN;DEN5B_HUMAN	DENND5A;DENND5B	DENN domain-containing protein 5A					7426.3	7656.07	9652.71	10609.6
Q6L8Q7;Q6L8Q7-2	Q6L8Q7;Q6L8Q7-2	PDE12_HUMAN	PDE12	2',5'-phosphodiesterase 12	5043.52	5012.89	4150.61	5200.45	4963.37	5615.67	4632.2	4983.98
Q6NSW5;Q8TCE6;Q8TCE6-2	Q8TCE6;Q6NSW5;Q8TCE6-2	DE10B_HUMAN;DEN10_HUMAN	DENND10;DENND10P1	Putative DENN domain-containing protein 10 B	3530	4172.06	4397.3	3075.34	3746.81	3725.35	3538.47	2732.11
Q6NVY1	Q6NVY1;Q6NVY1-2	HIBCH_HUMAN	HIBCH	3-hydroxyisobutyryl-CoA hydrolase, mitochondrial	224.72	509.534	508.262	702.964	456.041	490.231	346.739	357.877
Q6NXE6;Q6NXE6-2	Q6NXE6;Q6NXE6-2	ARMC6_HUMAN	ARMC6	Armadillo repeat-containing protein 6	1061.64	696.174	1232.28	532.181	1139.65	592.851	1462.15	450.745
Q6NXG1;Q6NXG1-2;Q6NXG1-3;Q6NXG1-4;Q6NXG1-5	Q6NXG1;Q9H6T0;Q6NXG1-3;Q6NXG1-2;Q6NXG1-4;Q6NXG1-5;Q9H6T0-2	ESRP1_HUMAN	ESRP1	Epithelial splicing regulatory protein 1	4561.52	4482.13	3827.37	4449.53	3685.63	5062.98	4798.06	4627.47
Q6NYC1;Q6NYC1-2;Q6NYC1-3	Q6NYC1;Q6NYC1-2;Q6NYC1-3	JMJD6_HUMAN	JMJD6	Bifunctional arginine demethylase and lysyl-hydroxylase JMJD6	2529.36	1867.17	2472.54	1598.4	2585.03	1732.92	2269.83	2275.2
Q6P158	Q6P158	DHX57_HUMAN	DHX57	Putative ATP-dependent RNA helicase DHX57	1309.3	1344.76	1161.51	1248.46	1241.45	1749.12	1510.84	1452.17
Q6P1A2;Q6P1A2-2	Q6P1A2;Q6P1A2-2	MBOA5_HUMAN	LPCAT3	Lysophospholipid acyltransferase 5	580.495	1671.46	1405.28	1159.95	1120.64	1885.13	1655.3	1776.88
Q6P1J9	Q6P1J9	CDC73_HUMAN	CDC73	Parafibromin	1240.15	1466.48	1728.6	1531.96	2194.73	1485.21	1050.95	1525.86
Q6P1L8	Q6P1L8	RM14_HUMAN	MRPL14	Large ribosomal subunit protein uL14m		643.395	421.042	437.514	419.728		446.765	651.308
Q6P1M0	Q6P1M0;Q6P1M0-2	S27A4_HUMAN	SLC27A4	Long-chain fatty acid transport protein 4	2787.24	2029.79	2782.2	2332.84	3085.23	2640.29	2477.87	2688.97
Q6P1M3;Q6P1M3-2	Q6P1M3;Q6P1M3-2	L2GL2_HUMAN	LLGL2	LLGL scribble cell polarity complex component 2	2267.7	3201.66	2360.99	2259.15	2872.41	2776.67	2631.9	2671.81
Q6P1N0;Q6P1N0-2	Q6P1N0;Q6P1N0-2	C2D1A_HUMAN	CC2D1A	Coiled-coil and C2 domain-containing protein 1A	2339.73	2111.6	2522.68	2397.65	3330.26	2888.45	2857.6	2372.4
Q6P1N9	Q6P1N9;Q6P1N9-2	TATD1_HUMAN	TATDN1	Deoxyribonuclease TATDN1	3311.53	3856.2	2674.74	3566.29	2379.63	2845.45	2703.59	2803.43
Q6P1Q9;Q6P1Q9-2	Q6P1Q9;Q6P1Q9-2	MET2B_HUMAN	METTL2B	tRNA N(3)-methylcytidine methyltransferase METTL2B	614.279	481.502			1025.09	712.154	561.932	643.333
Q6P1X6-2	Q6P1X6;Q6P1X6-2	CH082_HUMAN	C8orf82	Isoform 2 of UPF0598 protein C8orf82	1761.99	1732.27	1576.11	2102.1	1769.07	1326.77	1764.02	2335.74
Q6P2E9	Q6P2E9	EDC4_HUMAN	EDC4	Enhancer of mRNA-decapping protein 4	1325.96	1203.65	1480.37	1294.72	1328.25	1279.15	1516.91	1495.87
Q6P2Q9	Q6P2Q9	PRP8_HUMAN	PRPF8	Pre-mRNA-processing-splicing factor 8	7018.75	6761.17	7824.79	7126.72	7661	7242.93	7665.33	6534.58
Q6P3W7	Q6P3W7	SCYL2_HUMAN	SCYL2	SCY1-like protein 2	1408.77	1342.7	1693.12	1168.26	1500.66	1069.27	1497.57	1255.36
Q6P3X3	Q6P3X3	TTC27_HUMAN	TTC27	Tetratricopeptide repeat protein 27	324.857	115.924	607.071	412.451		357.698	442.47	751.945
Q6P4Q7;Q6P4Q7-2	Q6P4Q7;Q6P4Q7-2	CNNM4_HUMAN	CNNM4	Metal transporter CNNM4	1502.42	2048.88	1350.67	1620.43	1954.75	1146.16	1477.97	2036.92
Q6P587;Q6P587-2;Q6P587-3	Q6P587;Q6P587-2;Q6P587-3	FAHD1_HUMAN	FAHD1	Acylpyruvase FAHD1, mitochondrial	2810.63	2954.99	1590.19	2518.3	2021.64	2537.26	1973.22	2880.96
Q6P5R6	Q6P5R6	RL22L_HUMAN	RPL22L1	Ribosomal protein eL22-like	5758.1	4266.04	4912.57	4671.09	4906.11	2038.85	6059.1	4728.17
Q6P6C2;Q6P6C2-1;Q6P6C2-3	Q6P6C2;Q6P6C2-1;Q6P6C2-3	ALKB5_HUMAN	ALKBH5	RNA demethylase ALKBH5	843.59		756.54	505.617	395.56	820.943	654.37	684.308
Q6P996;Q6P996-4;Q6P996-5	Q6P996;Q6P996-2;Q6P996-3;Q6P996-4;Q6P996-5	PDXD1_HUMAN	PDXDC1	Pyridoxal-dependent decarboxylase domain-containing protein 1	5656.27	3808.95	4615.65	4376.6	4586.94	3510.57	4542.84	4664.35
Q6P9B6	Q6P9B6	MEAK7_HUMAN	MEAK7	MTOR-associated protein MEAK7	686.014	1026.85	1136.84	1222.24	1085.26	1293.21	835.471	1574.77
Q6PD74	Q6PD74	AAGAB_HUMAN	AAGAB	Alpha- and gamma-adaptin-binding protein p34	1350.69	1255.14	969.586	772.596		539.666	1292.35	958.339
Q6PGP7	Q6PGP7	SKI3_HUMAN	SKIC3	Superkiller complex protein 3	1781.53	1892.32	2122.39	2186.29	2267.44	1689.02	2170.41	1858.47
Q6PHR2;Q6PHR2-2;Q6PHR2-3	Q6PHR2;Q6PHR2-2;Q6PHR2-3	ULK3_HUMAN	ULK3	Serine/threonine-protein kinase ULK3	850.751						416.737	150.375
Q6PI48	Q6PI48	SYDM_HUMAN	DARS2	Aspartate--tRNA ligase, mitochondrial	7377.07	8660.66	7971.33	7666.95	8733.32	9024.5	7625.11	6989.13
Q6PIU2;Q6PIU2-2;Q6PIU2-3	Q6PIU2;Q6PIU2-2;Q6PIU2-3	NCEH1_HUMAN	NCEH1	Neutral cholesterol ester hydrolase 1	890.379	1039.33	763.975	1186.17	1096.34	1179.89	1029.55	991.439
Q6PJG6;Q6PJG6-2	Q6PJG6;Q6PJG6-2	BRAT1_HUMAN	BRAT1	BRCA1-associated ATM activator 1			928.351	666.052		323.139	500.717	397.967
Q6PKG0;Q6PKG0-3	Q659C4;Q6PKG0;Q659C4-6;Q659C4-2;Q659C4-5;Q659C4-7;Q6PKG0-3	LARP1_HUMAN	LARP1	La-related protein 1	3148.77	3983.34	5134.22	3433.63	4349.15	4485.77	5600.89	4119.07
Q6UB35	Q6UB35	C1TM_HUMAN	MTHFD1L	Monofunctional C1-tetrahydrofolate synthase, mitochondrial	3429.93	3217.65	2737.74	3004.52	3314.33	2929.65	2394.85	2503.48
Q6UW68	Q6UW68	TM205_HUMAN	TMEM205	Transmembrane protein 205	3139.8	3533.04	2563.76	3698.82	3599.73	3426.67	3179.44	4767.65
Q6UWE0;Q6UWE0-2	Q6UWE0;Q6UWE0-2	LRSM1_HUMAN	LRSAM1	E3 ubiquitin-protein ligase LRSAM1	768.375	484.583	420.878	379.206	344.28	810.21	714.578	439.72
Q6UXG2;Q6UXG2-3	Q6UXG2;Q6UXG2-3;Q6UXG2-2;Q6UXG2-4	ELAP1_HUMAN	ELAPOR1	Endosome/lysosome-associated apoptosis and autophagy regulator 1	2488.09	2475.5	2571.47	2173.14	2373.08	2363.08	2119.92	2482.5
Q6UXN9	Q6UXN9	WDR82_HUMAN	WDR82	WD repeat-containing protein 82	3090.11	3197.43	2815.65	3795.26	2885.62	3173.3	4046.11	3701.65
Q6VY07;Q6VY07-2	Q6VY07;Q6VY07-2	PACS1_HUMAN	PACS1	Phosphofurin acidic cluster sorting protein 1	343.718	158.015	481.99	450.444	751.283	356.952	383.016	392.596
Q6YN16;Q6YN16-2	Q6YN16;Q6YN16-2	HSDL2_HUMAN	HSDL2	Hydroxysteroid dehydrogenase-like protein 2	1923.57	2107.29	1670.14	1096.01	1447.61	1128.58	834.836	1507.44
Q6YP21;Q6YP21-3	Q6YP21;Q6YP21-3	KAT3_HUMAN	KYAT3	Kynurenine--oxoglutarate transaminase 3	1144.94	1399.71	1292.52	700.552	1142.46	1221.26	1381.24	1318.68
Q6ZNL6	Q6ZNL6	FGD5_HUMAN	FGD5	FYVE, RhoGEF and PH domain-containing protein 5		898.573
Q6ZRS2;Q6ZRS2-2;Q6ZRS2-3	Q6ZRS2;Q6ZRS2-3;Q6ZRS2-2	SRCAP_HUMAN	SRCAP	Helicase SRCAP	2693.93	9519.16	6042.3	8313.7	5633.91	8417.23	4981.23	8437.97
Q6ZRV2	Q6ZRV2	FA83H_HUMAN	FAM83H	Protein FAM83H	1000.77	1049.69	1399.45	1292.51	1875.92	820.441	1734.76	1523.28
Q6ZT12;Q6ZT12-4	Q6ZT12;Q6ZT12-4	UBR3_HUMAN	UBR3	E3 ubiquitin-protein ligase UBR3	1506.05	747.055	1174.16	1590.52	1243.76	452.488	856.678	613.557
Q6ZXV5;Q6ZXV5-2	Q6ZXV5;Q6ZXV5-2	TMTC3_HUMAN	TMTC3	Protein O-mannosyl-transferase TMTC3	1011.18	1536.46	1873.16	1951.88	1523.65	1513.18	1902.6	1705.67
Q70CQ2	Q70CQ2;Q70CQ2-2;Q70CQ2-3	UBP34_HUMAN	USP34	Ubiquitin carboxyl-terminal hydrolase 34	1150.29	1591.62	1498.2	1422.07	14864.9	14157.6	11754.3	10575.2
Q70CQ3	Q70CQ3	UBP30_HUMAN	USP30	Ubiquitin carboxyl-terminal hydrolase 30					3069.24	3588.06	3524.29	2832.75
Q70CQ4	Q70CQ4	UBP31_HUMAN	USP31	Ubiquitin carboxyl-terminal hydrolase 31				276.003	2695.23	2775.93	2651.66	2800.07
Q70EL4;Q70EL4-4	Q70EL4;Q70EL4-4	UBP43_HUMAN	USP43	Ubiquitin carboxyl-terminal hydrolase 43					2210.7	2175.66	1490.13	1527.85
Q71RC2;Q71RC2-3;Q71RC2-4;Q71RC2-5;Q71RC2-6;Q71RC2-7	Q71RC2;Q71RC2-3;Q71RC2-4;Q71RC2-5;Q71RC2-6;Q71RC2-7	LARP4_HUMAN	LARP4	La-related protein 4	230.055	66.4568	252.775					233.848
Q71UM5	Q71UM5	RS27L_HUMAN	RPS27L	Ribosomal protein eS27-like	5098.77	4229.29	4256.45	4971.32	4403.48	4698.12	4139.21	4381.02
Q7KZ85	Q7KZ85	SPT6H_HUMAN	SUPT6H	Transcription elongation factor SPT6	1865.49				2281.63	2822.19	2203.58
Q7KZF4	Q7KZF4	SND1_HUMAN	SND1	Staphylococcal nuclease domain-containing protein 1	12109	13302.3	13820.6	13652	12422	12575.1	12490.9	12799.8
Q7L014	Q7L014	DDX46_HUMAN	DDX46	Probable ATP-dependent RNA helicase DDX46	362.513	1005.33		701.013		396.554	426.394	820.186
Q7L0Y3	Q7L0Y3	TM10C_HUMAN	TRMT10C	tRNA methyltransferase 10 homolog C	2870.48	3069.32	4187.87	3824.88	3303.7	3720.15	3331.15	3616.55
Q7L1Q6;Q7L1Q6-2;Q7L1Q6-3;Q7L1Q6-4	Q7L1Q6;Q7L1Q6-2;Q7L1Q6-3;Q7L1Q6-4	5MP2_HUMAN	BZW1	eIF5-mimic protein 2	758.08	1537.75	1494.73	1278.84	1580.21	1423.25	1553.88	1305.13
Q7L2E3;Q7L2E3-2;Q7L2E3-3	Q7L2E3;Q7L2E3-2;Q7L2E3-3	DHX30_HUMAN	DHX30	ATP-dependent RNA helicase DHX30	2836.17	3278.82	3178.81	3005.65	3718.06	2679.44	3664.81	2993.86
Q7L2H7	Q7L2H7	EIF3M_HUMAN	EIF3M	Eukaryotic translation initiation factor 3 subunit M	7002.86	7440.9	7382.36	7460.35	5806.22	5894.14	7095.29	6259.25
Q7L2J0	Q7L2J0;Q7L2J0-2	MEPCE_HUMAN	MEPCE	7SK snRNA methylphosphate capping enzyme	3067.19	4021.85	3225.4	4147.49	3703.13	3979.63	3811.08	4285.96
Q7L576	Q7L576	CYFP1_HUMAN	CYFIP1	Cytoplasmic FMR1-interacting protein 1	5150.01	5501.88	5807.73	5625.3	6201.15	6366.31	6346.18	5971.85
Q7L5D6	Q7L5D6;Q7L5D6-2	GET4_HUMAN	GET4	Golgi to ER traffic protein 4 homolog	6882.73	8420.93	6698.24	7275.08	7126.24	6349.05	6563.76	6360.6
Q7L5N1	Q7L5N1	CSN6_HUMAN	COPS6	COP9 signalosome complex subunit 6	835.171	607.296	801.585	1070.73	613.31	686.546	1192.52	1277.51
Q7L5Y9;Q7L5Y9-2;Q7L5Y9-3	Q7L5Y9;Q7L5Y9-2;Q7L5Y9-3	MAEA_HUMAN	MAEA	E3 ubiquitin-protein transferase MAEA	705.864		1065.47			756.339	1034.93	775.015
Q7L775	Q7L775	EPMIP_HUMAN	EPM2AIP1	EPM2A-interacting protein 1	1405.29	1968.66	1369.33	1833.37	1578.71	1289.34	1540.11	1449.73
Q7L9L4;Q7L9L4-2;Q9H8S9	Q7L9L4;Q9H8S9;Q7L9L4-2	MOB1A_HUMAN;MOB1B_HUMAN	MOB1A;MOB1B	MOB kinase activator 1B	1488.92	925.753	1097.59	1006.7	1615.45	1689.73	1888.64	1077.8
Q7LBC6	Q7LBC6;Q7LBC6-2;Q7LBC6-3	KDM3B_HUMAN	KDM3B	Lysine-specific demethylase 3B	1587.9	1756.73	2223.78	3272.49	2030.6	1440.02	2193.29	1773.78
Q7LG56;Q7LG56-2;Q7LG56-6	Q7LG56;Q7LG56-2;Q7LG56-6	RIR2B_HUMAN	RRM2B	Ribonucleoside-diphosphate reductase subunit M2 B	3484.73	2862.45	3488.67	3270.58	3005.04	3958.83	3382.49	2865.2
Q7RTP0	Q7RTP0	NIPA1_HUMAN	NIPA1	Magnesium transporter NIPA1					456.787
Q7RTS9	Q7RTS9;Q7RTS9-2	DYM_HUMAN	DYM	Dymeclin	1788.96	1822.59	2314.31	1585.6	2106.93	2554.67	1402.64	1876.58
Q7Z2K6	Q7Z2K6	ERMP1_HUMAN	ERMP1	Endoplasmic reticulum metallopeptidase 1	1714.61	2263.73	2225.2		2435.69	1445.65	936.047
Q7Z2T5	Q7Z2T5	TRM1L_HUMAN	TRMT1L	TRMT1-like protein	1681.54	1759.31	2321.32	1814.34	1966.85	1702.18	1976.63	1787.85
Q7Z2W4	Q7Z2W4;Q7Z2W4-2	ZCCHV_HUMAN	ZC3HAV1	Zinc finger CCCH-type antiviral protein 1	3551.59	4263.05	4706.39	4478.15	4180.92	5622.13	4746.13	4145.18
Q7Z2W9;Q7Z2W9-2	Q7Z2W9;Q7Z2W9-2	RM21_HUMAN	MRPL21	Large ribosomal subunit protein bL21m	313.128	539.037	213.306	406.094				487.901
Q7Z2Z2;Q7Z2Z2-2	Q7Z2Z2;Q7Z2Z2-2	EFL1_HUMAN	EFL1	Elongation factor-like GTPase 1	724.039	843.223	987.761	1814.59	1283.51	979.346	1080.72	1253.04
Q7Z3B4;Q7Z3B4-3	Q7Z3B4;Q7Z3B4-3	NUP54_HUMAN	NUP54	Nucleoporin p54	1192.61	1834.33	1566.73	1488.76	1106.08	1012.05	666.367	1267.28
Q7Z3C6;Q7Z3C6-2	Q7Z3C6;Q7Z3C6-2	ATG9A_HUMAN	ATG9A	Autophagy-related protein 9A	594.652	825.641	1272.81	1022.68	1710.15	1068.68	1138.28	734.625
Q7Z3U7;Q7Z3U7-2;Q7Z3U7-5;Q7Z3U7-6	Q7Z3U7;Q7Z3U7-2;Q7Z3U7-3;Q7Z3U7-5;Q7Z3U7-6	MON2_HUMAN	MON2	Protein MON2 homolog	1618.48	1208.22	1363.72	2016.55	1809.55	2684.62	2017.38	1466.35
Q7Z406;Q7Z406-2;Q7Z406-6	P35580;Q7Z406;P35580-2;P35580-3;P35580-4;P35580-5;Q7Z406-2;Q7Z406-4;Q7Z406-5;Q7Z406-6	MYH14_HUMAN	MYH14	Myosin-14	4571.19	4256.09	4617.82	4256.08	3551.01	3791.53	3892.96	4514.18
Q7Z417	Q7Z417	NUFP2_HUMAN	NUFIP2	FMR1-interacting protein NUFIP2	1739.16	417.645	2034.32	1226.45	1058.19	2584.67	1089.61	905.862
Q7Z478	Q7Z478	DHX29_HUMAN	DHX29	ATP-dependent RNA helicase DHX29	2258.23	2731.59	2295.74	2583.88	3068.3	2783.81	2735.43	2582.04
Q7Z4G4;Q7Z4G4-2;Q7Z4G4-3	Q7Z4G4;Q7Z4G4-2;Q7Z4G4-3	TRM11_HUMAN	TRMT11	tRNA (guanine(10)-N2)-methyltransferase homolog	188.323	333.926		94.1243	897.938	255.372	218.908
Q7Z4W1	Q7Z4W1	DCXR_HUMAN	DCXR	L-xylulose reductase	28359.5	25414.5	21618.7	24012.3	20066.5	21780.4	23142	26002.3
Q7Z6Z7;Q7Z6Z7-2;Q7Z6Z7-3	Q7Z6Z7;Q7Z6Z7-2;Q7Z6Z7-3	HUWE1_HUMAN	HUWE1	E3 ubiquitin-protein ligase HUWE1	4532.93	4231.32	4931.21	4637.36	12649.4	12127.6	11235.3	11651.1
Q7Z739	Q7Z739;Q9BYJ9	YTHD3_HUMAN	YTHDF3	YTH domain-containing family protein 3	664.885	629.669	962.866	857.872	891.284	808.583	877.77	715.133
Q7Z794	Q7Z794	K2C1B_HUMAN	KRT77	Keratin, type II cytoskeletal 1b	5308.84	1939.58						1630.53
Q7Z7A3	Q7Z7A3	CTU1_HUMAN	CTU1	Cytoplasmic tRNA 2-thiolation protein 1	812.801	610.341	1104.76	1476.92	982.918	1088.16	768.37	804.641
Q7Z7E8	Q7Z7E8	UB2Q1_HUMAN	UBE2Q1	Ubiquitin-conjugating enzyme E2 Q1	1346.13	3257.86	3224.26	3081.07	2134.31	2960.96	2297.32	2535.16
Q7Z7H5;Q7Z7H5-2;Q7Z7H5-3	Q7Z7H5;Q7Z7H5-2;Q7Z7H5-3	TMED4_HUMAN	TMED4	Transmembrane emp24 domain-containing protein 4	4721.62	5166.74	6369.93	5679.31	5782.98	4939.78	5367.01	4565.78
Q7Z7L7	Q7Z7L7	ZER1_HUMAN	ZER1	Protein zer-1 homolog	1017.17		523.726		469.041	398.941		703.526
Q86SE5;Q86SE5-3	Q86SE5;Q86SE5-3	RALYL_HUMAN	RALYL	RNA-binding Raly-like protein	1578.27	1802.83	1498.7	1967.39	1412.18	1154.35	1939.81	1243.37
Q86SF2	Q86SF2	GALT7_HUMAN	GALNT7	N-acetylgalactosaminyltransferase 7	986.827	1267.1	617.011	1138.68	807.04	998.244	1112.63	1431.13
Q86T82;Q86T82-2	Q86T82;Q86T82-2	UBP37_HUMAN	USP37	Ubiquitin carboxyl-terminal hydrolase 37					1122.28	636.51	571.688	1293.52
Q86TI0;Q86TI0-2	Q86TI0;Q86TI0-2	TBCD1_HUMAN	TBC1D1	TBC1 domain family member 1	67.6108	113.764	327.191	247.274			421.299	269.124
Q86TI2;Q86TI2-2;Q86TI2-4	Q86TI2;Q86TI2-2;Q86TI2-4	DPP9_HUMAN	DPP9	Dipeptidyl peptidase 9	1780.27	2555.81	2749.74	2656.44	2675.42	3382.17	2930.33	3033.25
Q86TP1	Q86TP1	PRUN1_HUMAN	PRUNE1	Exopolyphosphatase PRUNE1	3182.85	3767	3198.21	4001.24	3801.81	2868.36	3266.09	3845.97
Q86TU7	Q86TU7	SETD3_HUMAN	SETD3	Actin-histidine N-methyltransferase	2285.28	2556.59	2203.67	3708.38	3665.72	3042.11	1910.2	2937.61
Q86U44	Q86U44	MTA70_HUMAN	METTL3	N6-adenosine-methyltransferase catalytic subunit	810.277	1059.82	1008.25	774.302	1220.99	1026.05	991.902	1151.64
Q86UA6;Q86UA6-2;Q86UA6-3;Q86UA6-4;Q86UA6-5;Q86UA6-6;Q86UA6-7;Q86UA6-8;Q86UA6-9	Q86UA6;Q86UA6-2;Q86UA6-3;Q86UA6-4;Q86UA6-5;Q86UA6-6;Q86UA6-7;Q86UA6-8;Q86UA6-9	RIP_HUMAN	RPAIN	RPA-interacting protein	442.077				3817.42	4687.64	2873.62	3235.27
Q86UE4	Q86UE4	LYRIC_HUMAN	MTDH	Protein LYRIC	1770.16	1966.95	900.744	1588.86	1498.46	973.817	1523.46	1242.51
Q86UV5;Q86UV5-8	Q86UV5;Q86UV5-2;Q86UV5-3;Q86UV5-4;Q86UV5-7;Q86UV5-8	UBP48_HUMAN	USP48	Ubiquitin carboxyl-terminal hydrolase 48	1315.76	1459.33	1099.14	1168.91	6539.73	6299.94	6478.69	5546.3
Q86V21;Q86V21-2	Q86V21;Q86V21-2	AACS_HUMAN	AACS	Acetoacetyl-CoA synthetase	2715.03	1869.22	3327.9	2863.5	2688.86	3117.2	1947.64	2357.43
Q86V81	Q86V81	THOC4_HUMAN	ALYREF	THO complex subunit 4	682.103	811.402	864.191	832.657	439.006	405.636		160.291
Q86VI3	Q86VI3	IQGA3_HUMAN	IQGAP3	Ras GTPase-activating-like protein IQGAP3		997.78	1026.02	853.887	718.166		534.081	190.73
Q86VN1	Q86VN1;Q86VN1-2	VPS36_HUMAN	VPS36	Vacuolar protein-sorting-associated protein 36	1754.9	1408.03	3040.71	1728.88	1857.85	1347.2	1429.38	1420.15
Q86VP6	Q86VP6	CAND1_HUMAN	CAND1	Cullin-associated NEDD8-dissociated protein 1	28397.2	21015.7	27561	24282.5	23240.6	18669.2	25536.9	23266.4
Q86W34	Q86W34	AMZ2_HUMAN	AMZ2	Archaemetzincin-2	1118.39	1416.43	1269.08	2595.76	1929.49	1671.71	1970.89	2189.82
Q86W42;Q86W42-2;Q86W42-3	Q86W42;Q86W42-2;Q86W42-3	THOC6_HUMAN	THOC6	THO complex subunit 6 homolog	1699.08	1493.75	1692.44	1330.69	1657.16	1541.8	1409.48	1753.42
Q86W50	Q86W50	MET16_HUMAN	METTL16	RNA N6-adenosine-methyltransferase METTL16	1508.15	959.161	1264	864.882	1505.7	1084.54	1167	1093.27
Q86WA6;Q86WA6-2	Q86WA6;Q86WA6-2	BPHL_HUMAN	BPHL	Valacyclovir hydrolase	1451.71	1557.54	1934.73	1834.62	1878.44	1865.84	2190.95	2150.05
Q86WJ1;Q86WJ1-2;Q86WJ1-4	Q86WJ1;Q86WJ1-2;Q86WJ1-4	CHD1L_HUMAN	CHD1L	Chromodomain-helicase-DNA-binding protein 1-like		10305.7	11601.9	10033		12273.2		10042.7
Q86WQ0;Q86WQ0-2	Q86WQ0;Q86WQ0-2	NR2CA_HUMAN	NR2C2AP	Nuclear receptor 2C2-associated protein	1789	2370.55	1376.23	2071.23	895.62	1651.01	660.745	2030.44
Q86X10-3	Q86X10-3	RLGPB_HUMAN	RALGAPB	Isoform 3 of Ral GTPase-activating protein subunit beta		766.072		606.304		357.328		335.988
Q86X29;Q86X29-3;Q86X29-4;Q86X29-5;Q86X29-6	Q86X29;Q86X29-3;Q86X29-4;Q86X29-5;Q86X29-6	LSR_HUMAN	LSR	Lipolysis-stimulated lipoprotein receptor	986.008	915.752	644.632	1223.89	855.387	1130.44	900.526	869.479
Q86X55;Q86X55-1	Q86X55;Q86X55-1;Q86X55-2	CARM1_HUMAN	CARM1	Histone-arginine methyltransferase CARM1	7660.49	8578.11	9126.18	9174.96	8914.14	9504.98	7929.89	7479.34
Q86XI2;Q86XI2-2	Q86XI2;Q86XI2-2	CNDG2_HUMAN	NCAPG2	Condensin-2 complex subunit G2	624.313		253.025		493.533			567.339
Q86XP3	Q86XP3;Q86XP3-2	DDX42_HUMAN	DDX42	ATP-dependent RNA helicase DDX42	2561.96	1542.76	2423.42	1345.32	1949.73	1814.13	1585.76	1450.09
Q86XR7-2;Q9Y3B3;Q9Y3B3-2	Q9Y3B3;Q86XR7-2;Q9Y3B3-2	TCAM2_HUMAN;TMED7_HUMAN	TICAM2;TMED7	Isoform 2 of TIR domain-containing adapter molecule 2	5647.91	7422.6	5754.13	7095.04	5932.87	6550.41	5792.56	6153.89
Q86Y39;Q86Y39-2	Q86Y39;Q86Y39-2	NDUAB_HUMAN	NDUFA11	NADH dehydrogenase [ubiquinone] 1 alpha subcomplex subunit 11	478.085	699.545			736.741		796.079	536.756
Q86Y56	Q86Y56;Q86Y56-2;Q86Y56-3	DAAF5_HUMAN	DNAAF5	Dynein axonemal assembly factor 5	2766.94	1869.21	2812.89	1933.49	2775.92	1371.63	2911.42	1867.89
Q86YP4;Q86YP4-2;Q86YP4-3	Q86YP4;Q86YP4-3;Q86YP4-2	P66A_HUMAN	GATAD2A	Transcriptional repressor p66-alpha			361.352					380.366
Q86YS7;Q86YS7-2;Q86YS7-3;Q86YS7-4;Q86YS7-5	Q86YS7;Q86YS7-2;Q86YS7-3;Q86YS7-4;Q86YS7-5	C2CD5_HUMAN	C2CD5	C2 domain-containing protein 5	1212.12	1096.09	1339.41	1541.15	1277.96	1364.89	1238.83	1842.74
Q86YV9	Q86YV9	HPS6_HUMAN	HPS6	BLOC-2 complex member HPS6	1592.94	1456.81	773.93	934.156		1169.85		1524.02
Q8IUF1;Q9BRT8;Q9BRT8-3;Q9BRT8-4	Q9BRT8;Q8IUF1;Q9BRT8-2;Q9BRT8-3;Q9BRT8-4	ZNG1A_HUMAN;ZNG1B_HUMAN	ZNG1A;ZNG1B	Zinc-regulated GTPase metalloprotein activator 1B	1223.78	1404.65	902.996	865.641	544.853	959.804	938.336	989.872
Q8IUF8	Q8IUF8;Q8IUF8-2;Q8IUF8-4	RIOX2_HUMAN	RIOX2	Ribosomal oxygenase 2	562.979		613.165	237.246	246.972	323.7	493.509	406.664
Q8IV08	Q8IV08	PLD3_HUMAN	PLD3	5'-3' exonuclease PLD3	6651.85	6717.46	6806.35	7450.2	7455.59	8295.71	7358.05	6642.93
Q8IV36;Q8IV36-2	Q8IV36;Q8IV36-2;Q8IV36-3	HID1_HUMAN	HID1	Protein HID1	2355.28	1957.59	2380.2	2385.6	2471.03	1889.74	3074.09	2560.83
Q8IV50	Q8IV50;Q8IV50-2	LYSM2_HUMAN	LYSMD2	LysM and putative peptidoglycan-binding domain-containing protein 2	527.689	716.505	734.16	499.009	585.544	852.072	420.837	376.382
Q8IVD9	Q8IVD9	NUDC3_HUMAN	NUDCD3	NudC domain-containing protein 3	543.057	473.13	563.543	760.589	599.021		246.689	486.755
Q8IWS0;Q8IWS0-2;Q8IWS0-3;Q8IWS0-4;Q8IWS0-5	Q8IWS0;Q8IWS0-2;Q8IWS0-3;Q8IWS0-4;Q8IWS0-5	PHF6_HUMAN	PHF6	PHD finger protein 6	2447.55	1562.91	2528.29	1750.71	2023.98	2084.07	2154.12	967.205
Q8IWV8;Q8IWV8-4	Q8IWV8;Q8IWV8-4	UBR2_HUMAN	UBR2	E3 ubiquitin-protein ligase UBR2	573.802		381.694	668.189	785.567	877.098	945.927	919.3
Q8IWZ3;Q8IWZ3-4;Q8IWZ3-6	Q8IWZ3;Q8IWZ3-4;Q8IWZ3-6	ANKH1_HUMAN	ANKHD1	Ankyrin repeat and KH domain-containing protein 1	587.19	540.268	835.782	433.893		804.529		646.561
Q8IX04;Q8IX04-2;Q8IX04-3;Q8IX04-6	Q8IX04;Q8IX04-2;Q8IX04-3;Q8IX04-4;Q8IX04-6;Q8IX04-7	UEVLD_HUMAN	UEVLD	Ubiquitin-conjugating enzyme E2 variant 3	614.509	275.461	612.241	513.307	564.487	632.947	660.665	504.233
Q8IX12;Q8IX12-2	Q8IX12;Q8IX12-2	CCAR1_HUMAN	CCAR1	Cell division cycle and apoptosis regulator protein 1	882.492	1617.85	916.589	1189.92	1234.67	666.863	1382.43	1868.77
Q8IX18;Q8IX18-3	Q8IX18;Q8IX18-2;Q8IX18-3;Q8IX18-4	DHX40_HUMAN	DHX40	Probable ATP-dependent RNA helicase DHX40	961.35	1273.47	1020.59	960.26	1238.35	1250.92	803.336	1413.06
Q8IXB1	Q8IXB1	DJC10_HUMAN	DNAJC10	DnaJ homolog subfamily C member 10	912.911	2150.54	1909.72	746.366	1417	1595.41	1344.88	1215.32
Q8IXH7;Q8IXH7-4	Q8IXH7;Q8IXH7-4	NELFD_HUMAN	NELFCD	Negative elongation factor C/D	407.117	267.094	320.625	311.106				370.988
Q8IXI1	Q8IXI1	MIRO2_HUMAN	RHOT2	Mitochondrial Rho GTPase 2	1124.48	1196.78	1369.91	1495.79	1185.14	1507.3	782.528	1101.3
Q8IXM3	Q8IXM3	RM41_HUMAN	MRPL41	Large ribosomal subunit protein mL41	952.95	1233.23	1463.41	1379.86	1454.83	922.193	1065.48	522.755
Q8IY17;Q8IY17-2;Q8IY17-3;Q8IY17-5	Q8IY17;Q8IY17-2;Q8IY17-3;Q8IY17-5	PLPL6_HUMAN	PNPLA6	Patatin-like phospholipase domain-containing protein 6	640.891	937.481	624.855	694.399	562.133	725.777	880.255	941.76
Q8IY67;Q8IY67-2	Q8IY67;Q8IY67-2	RAVR1_HUMAN	RAVER1	Ribonucleoprotein PTB-binding 1	2498.26	2909.83	2458.94	2430.52	2550.53	2124.01	2650.55	2445.38
Q8IYB5;Q8IYB5-2;Q8IYB5-3	Q8IYB5;Q8IYB5-2;Q8IYB5-3	SMAP1_HUMAN	SMAP1	Stromal membrane-associated protein 1	2741.69	3721.02	1890.34	3047.73	4114.28	2395.98	2728.27	2286.99
Q8IYB7	Q8IYB7	DI3L2_HUMAN	DIS3L2	DIS3-like exonuclease 2	685.074	524.493	922.278	286.444	582.514	730.269	635.467	476.578
Q8IYB8	Q8IYB8	SUV3_HUMAN	SUPV3L1	ATP-dependent RNA helicase SUPV3L1, mitochondrial	1435.06	1666.78	1610.37	1683.96	2414.35	1798.45	1890.92	2382.38
Q8IYD1	Q8IYD1	ERF3B_HUMAN	GSPT2	Eukaryotic peptide chain release factor GTP-binding subunit ERF3B	1608.18	1167.47	632.485	648.637	1216.59	1202.18	1293.77	463.581
Q8IYQ7	Q8IYQ7	THNS1_HUMAN	THNSL1	Threonine synthase-like 1	1992.79	1706.11	1645.87	1637.26	1918.62	2197.97	1714.69	1608.15
Q8IZ81	Q8IZ81	ELMD2_HUMAN	ELMOD2	ELMO domain-containing protein 2			1729.15	2084	1894.4	1744.01	1493.33	2629.44
Q8IZH2;Q8IZH2-2	Q8IZH2;Q8IZH2-2	XRN1_HUMAN	XRN1	5'-3' exoribonuclease 1	627.186	793.478	861.047	672.333	1008.65	1056.09	979.918	1028.02
Q8N122	Q8N122;Q8N122-3	RPTOR_HUMAN	RPTOR	Regulatory-associated protein of mTOR	1239.87	1214.34	1033.6	1174.89	1523.74	1374.01	1414.07	1175
Q8N163	Q8N163;Q8N163-2	CCAR2_HUMAN	CCAR2	Cell cycle and apoptosis regulator protein 2	8596.28	6907.16	9199.19	7556.3	7115.67	7530.71	8835.54	7791.33
Q8N1B4;Q8N1B4-2	Q8N1B4;Q8N1B4-2	VPS52_HUMAN	VPS52	Vacuolar protein sorting-associated protein 52 homolog	843.037	913.826	1070.11	780.52	1581.55	927.532	1887.36	1055.33
Q8N1F7	Q8N1F7;Q8N1F7-2	NUP93_HUMAN	NUP93	Nuclear pore complex protein Nup93	1862.08	1816.04	2080.98	1949.5	1767.79	1689.83	2269.26	2172.45
Q8N1G2	Q8N1G2	CMTR1_HUMAN	CMTR1	Cap-specific mRNA (nucleoside-2'-O-)-methyltransferase 1	6815.58	6532.16	6517.11	5982.72	7577.41	9126.81	6766.57	6160.72
Q8N1G4	Q8N1G4	LRC47_HUMAN	LRRC47	Leucine-rich repeat-containing protein 47	13903.1	13317.5	12673.2	11055.1	11528.7	12594	12926.2	12187
Q8N1N4	Q8N1N4;Q8N1N4-2	K2C78_HUMAN	KRT78	Keratin, type II cytoskeletal 78		405.2		293.917
Q8N1P7	Q8N1P7	CRBG2_HUMAN	CRYBG2	Beta/gamma crystallin domain-containing protein 2	1410.64	4436.27	1004.39	1881.68				2654.64
Q8N2N9;Q8N2N9-2;Q8N2N9-3	Q8N2N9;Q8N2N9-4;A6QL64;A6QL64-4;A6QL64-5;Q8N2N9-2;Q8N2N9-3	AN36B_HUMAN	ANKRD36B	Ankyrin repeat domain-containing protein 36B	1812.12	1975.21		836.349	644.177		508.014
Q8N335	Q8N335	GPD1L_HUMAN	GPD1L	Glycerol-3-phosphate dehydrogenase 1-like protein	1164.09	664.47	1314.54	956.378	1432.21	1221.48	1208.28	1163.94
Q8N3C0	Q8N3C0	ASCC3_HUMAN	ASCC3	Activating signal cointegrator 1 complex subunit 3	1951	1800.92	1822	1709.95	2248.98	1916.9	2239.49	2225.29
Q8N3P4;Q8N3P4-2;Q8N3P4-3	Q8N3P4;Q8N3P4-2;Q8N3P4-3	VPS8_HUMAN	VPS8	Vacuolar protein sorting-associated protein 8 homolog	599.028		1744.71		1585.11	956.959	902.441	1059.73
Q8N465	Q8N465	D2HDH_HUMAN	D2HGDH	D-2-hydroxyglutarate dehydrogenase, mitochondrial	1140.69	1459.88	921.359	1061.85	1688.66	1465.7	1272.78	1545.89
Q8N4C8;Q8N4C8-2;Q8N4C8-3;Q8N4C8-4;Q8N4C8-5	O95819;Q8N4C8;Q9UKE5;O95819-2;O95819-3;O95819-4;O95819-5;O95819-6;Q8N4C8-2;Q8N4C8-3;Q8N4C8-4;Q8N4C8-5;Q9UKE5-2;Q9UKE5-3;Q9UKE5-4;Q9UKE5-5;Q9UKE5-6;Q9UKE5-7;Q9UKE5-8	MINK1_HUMAN	MINK1	Misshapen-like kinase 1		1385.45	629.789	873.868	861.912	1205.9	897.45	1110.7
Q8N4N8;Q99661;Q99661-2	Q8N4N8;Q99661;Q99661-2	KIF2B_HUMAN;KIF2C_HUMAN	KIF2B;KIF2C	Kinesin-like protein KIF2B	1441.16	1025.46	1596.05	1397.69	1066.89	1041.87	1086.1	1474.04
Q8N4Q0;Q8N4Q0-2	Q8N4Q0;Q8N4Q0-2	PTGR3_HUMAN	PTGR3	Prostaglandin reductase 3	1813.21	1938.47	1820.31	2739.65	2359.54	1876.8	1889.38	1803.23
Q8N4T8;Q8N4T8-2	Q8N4T8;Q8N4T8-2	CBR4_HUMAN	CBR4	3-oxoacyl-[acyl-carrier-protein] reductase	390.101	1370.23	784.531	1117.86	1625.77	789.16	955.799	1148.05
Q8N543	Q8N543;Q8N543-2	OGFD1_HUMAN	OGFOD1	Prolyl 3-hydroxylase OGFOD1	891.281	1246.13	868.711	1451.21	1273.25	1279.53	741.139	1715.66
Q8N5C6	Q8N5C6	SRBD1_HUMAN	SRBD1	S1 RNA-binding domain-containing protein 1	316.58	2074.09	507.038		930.97		839.923	368.953
Q8N5C7;Q8N5C7-2	Q8N5C7;Q8N5C7-2	DTWD1_HUMAN	DTWD1	tRNA-uridine aminocarboxypropyltransferase 1	1771.07	2907.26	1882.04	2305.46	1666.89	1718.43	1569.42	1752.34
Q8N684;Q8N684-2;Q8N684-3	Q8N684;Q8N684-3;Q8N684-2	CPSF7_HUMAN	CPSF7	Cleavage and polyadenylation specificity factor subunit 7	2333.66	2892.4	2798.58	2355.05	2159.59	3040.64	2264.16	2677.23
Q8N6H7	Q8N6H7;Q8N6H7-2	ARFG2_HUMAN	ARFGAP2	ADP-ribosylation factor GTPase-activating protein 2	3275.77	2584.8	2364.6	2964.29	3625.33	2395.82	3774.88	2727.87
Q8N6L1;Q8N6L1-2	Q8N6L1;Q8N6L1-2	KTAP2_HUMAN	KRTCAP2	Keratinocyte-associated protein 2	569.247	87.3088	407.903	855.415	721.283	854.636	663.786	704.144
Q8N6M0	Q8N6M0	OTU6B_HUMAN	OTUD6B	Deubiquitinase OTUD6B	1078.03	1074.52	809.093	918.48	29387.8	27910.4	27150.4	31319.4
Q8N6R0	Q8N6R0;Q8N6R0-1;Q8N6R0-2;Q8N6R0-3	EFNMT_HUMAN	METTL13	eEF1A lysine and N-terminal methyltransferase	1508.41	1466.81	1698.83	1933.83	2152.08	1812.27	1452.7	1967.37
Q8N6T3;Q8N6T3-2;Q8N6T3-5	Q8N6T3;Q8N6T3-3;Q8N6T3-2;Q8N6T3-4;Q8N6T3-5	ARFG1_HUMAN	ARFGAP1	ADP-ribosylation factor GTPase-activating protein 1	3155.31	3764.62	3734.44	3818.61	4577.99	2777.98	2505.67	3112.53
Q8N766;Q8N766-2;Q8N766-3;Q8N766-4	Q8N766;Q8N766-2;Q8N766-3;Q8N766-4	EMC1_HUMAN	EMC1	ER membrane protein complex subunit 1	1143.43	1498.21	1163.15	1515.69	878.419	1317.94	860.562	1403.78
Q8N7H5;Q8N7H5-2;Q8N7H5-3	Q8N7H5;Q8N7H5-2;Q8N7H5-3	PAF1_HUMAN	PAF1	RNA polymerase II-associated factor 1 homolog	1618.95	2483.45	2266.69	2299.94	1702.03	2145.91	1908.24	1719.53
Q8N806	Q8N806	UBR7_HUMAN	UBR7	Putative E3 ubiquitin-protein ligase UBR7		981.628	1478.19	1516.26	1137.67	1335.49	1002.56	1236.98
Q8N8N7	Q8N8N7;Q8N8N7-2	PTGR2_HUMAN	PTGR2	Prostaglandin reductase 2	1652.26	2564.59	1470.54	2444.11	1761.13	1584.9	1986.63	2295.44
Q8N945;Q8N945-3	Q8N945;Q8N945-3	PRLD2_HUMAN	PRELID2	PRELI domain-containing protein 2						904.221	1234
Q8N983;Q8N983-2;Q8N983-3;Q8N983-4;Q8N983-6;Q8N983-7	Q8N983;Q8N983-3;Q8N983-2;Q8N983-4;Q8N983-6;Q8N983-7	RM43_HUMAN	MRPL43	Large ribosomal subunit protein mL43	1519.55		1640.6	1295.32	1383.26	1009.86	964.537	804.039
Q8N9N2-2	Q8N9N2-2	ASCC1_HUMAN	ASCC1	Isoform 2 of Activating signal cointegrator 1 complex subunit 1	355.518	417.945		462.091		384.677	368.796	444.113
Q8NB14	Q8NB14;Q8NB14-2	UBP38_HUMAN	USP38	Ubiquitin carboxyl-terminal hydrolase 38	1536.84	1150	1239.81	1075.3	11826.4	11213.3	9974.82	10269.8
Q8NB16	Q8NB16	MLKL_HUMAN	MLKL	Mixed lineage kinase domain-like protein	1119.5	1155.41	1687.89	830.143	856.443	933.606	812.598	1112.39
Q8NB46	Q8NB46	ANR52_HUMAN	ANKRD52	Serine/threonine-protein phosphatase 6 regulatory ankyrin repeat subunit C	1441.24	1510.73	1216.68	1743.36	1746.46	1845.12	2619.14	1687.96
Q8NB90	Q8NB90;Q8NB90-2;Q8NB90-3	AFG2A_HUMAN	AFG2A	ATPase family gene 2 protein homolog A	723.872	536.623	999.381	835.808		994.564	613.498	1139.28
Q8NBF2	Q8NBF2;Q8NBF2-2	NHLC2_HUMAN	NHLRC2	NHL repeat-containing protein 2	3079.62	2427.99	2756.02	2578.69	2535.13	2213.27	3342.97	2916.96
Q8NBF6;Q8NBF6-2	Q8NBF6;Q8NBF6-2	AVL9_HUMAN	AVL9	Late secretory pathway protein AVL9 homolog	1111.17	703.413	1151.35	1229.35	1560.28	1061.19	1731.98	1533.01
Q8NBJ5	Q8NBJ5	GT251_HUMAN	COLGALT1	Procollagen galactosyltransferase 1	4822.51	5399.88	4324.52	4705.42	6158.7	5521.21	4682.33	5191.55
Q8NBJ7;Q8NBJ7-2;Q8NBJ7-3	Q8NBJ7;Q8NBJ7-2;Q8NBJ7-3	SUMF2_HUMAN	SUMF2	Inactive C-alpha-formylglycine-generating enzyme 2		204.96	376.17	512.881		379.693	291.302	565.656
Q8NBM4;Q8NBM4-2;Q8NBM4-3;Q8NBM4-4	Q8NBM4;Q8NBM4-4;Q8NBM4-2;Q8NBM4-3	UBAC2_HUMAN	UBAC2	Ubiquitin-associated domain-containing protein 2	886.741		1074.8		635.627	1020.6	852.216	1066.68
Q8NBM8	Q8NBM8	PCYXL_HUMAN	PCYOX1L	Prenylcysteine oxidase-like	371.849	473.097		483.614	549.251	216.977		676.832
Q8NBS9;Q8NBS9-2	Q8NBS9;Q8NBS9-2	TXND5_HUMAN	TXNDC5	Thioredoxin domain-containing protein 5	4606.16	4986.18	4110.29	4485.74	3918.4	3516.63	4575.46	4310.5
Q8NC51;Q8NC51-2;Q8NC51-3;Q8NC51-4	Q8NC51;Q8NC51-2;Q8NC51-3;Q8NC51-4	SERB1_HUMAN	SERBP1	SERPINE1 mRNA-binding protein 1		258.928	382.304			168.436	268.966
Q8NCA5	Q8NCA5	FA98A_HUMAN	FAM98A	Protein FAM98A		496.914	569.324	588.039				614.404
Q8NCL4	Q8NCL4	GALT6_HUMAN	GALNT6	Polypeptide N-acetylgalactosaminyltransferase 6	1295.49	1531.9	934.693	1210.08	1318.99	1533.38	1078.88	1037.61
Q8NCN5	Q8NCN5	PDPR_HUMAN	PDPR	Pyruvate dehydrogenase phosphatase regulatory subunit, mitochondrial	2390.59	2530.01	2306.68	2406.1	2436.02	2642.65	2453.15	2345.78
Q8NCW5;Q8NCW5-2	Q8NCW5;Q8NCW5-2	NNRE_HUMAN	NAXE	NAD(P)H-hydrate epimerase	2630.2	3348.03	1611.99	1972.27	2527.32	2800.66	2478.37	3643.65
Q8ND04;Q8ND04-2	Q8ND04;Q8ND04-2	SMG8_HUMAN	SMG8	Nonsense-mediated mRNA decay factor SMG8	672.315	547.843	614.189	553.149	505.894	326.718	533.97	475.563
Q8NDH3;Q8NDH3-2;Q8NDH3-4;Q8NDH3-5	Q8NDH3;Q8NDH3-5;Q8NDH3-2;Q8NDH3-4	PEPL1_HUMAN	NPEPL1	Probable aminopeptidase NPEPL1	1845.2	2376.31	1793.93	1831.96	2140.41	1573.99	1979.4	2024.21
Q8NE01;Q8NE01-2;Q8NE01-3	Q8NE01;Q8NE01-3;Q8NE01-2	CNNM3_HUMAN	CNNM3	Metal transporter CNNM3	656.546	580.751	526.023	650.934	588.284	474.773	767.01	723.868
Q8NE62	Q8NE62	CHDH_HUMAN	CHDH	Choline dehydrogenase, mitochondrial		175.646	434.349	462.084	352.933	395.844	539.594	594.492
Q8NE71;Q8NE71-2	Q8NE71;Q8NE71-2	ABCF1_HUMAN	ABCF1	ATP-binding cassette sub-family F member 1	9392.83	9590.93	11735.5	10961.6	11606.3	13223.8	12735	10409.9
Q8NE86;Q8NE86-2;Q8NE86-3	Q8NE86;Q8NE86-2;Q8NE86-3	MCU_HUMAN	MCU	Calcium uniporter protein, mitochondrial	1828.8	2023.21	2551.66		1593.3		1858.05
Q8NEB9	Q8NEB9	PK3C3_HUMAN	PIK3C3	Phosphatidylinositol 3-kinase catalytic subunit type 3	1218.21	1315.56	1729.47	927.602	1675.03	1002.48	1419.57	1312.3
Q8NEC7	Q8NEC7	GSTCD_HUMAN	GSTCD	Glutathione S-transferase C-terminal domain-containing protein	2507.88	1916.02	2516.68	2219.9	1877.31			2071.76
Q8NEW0	Q8NEW0	ZNT7_HUMAN	SLC30A7	Zinc transporter 7	2968.84	2865.95		2199.61	2957.84		1776.17	2248
Q8NEZ5	Q8NEZ5;Q8NEZ5-3	FBX22_HUMAN	FBXO22	F-box only protein 22	6908.54	8219.9	7069.75	7893.13	6389.49	7855.85	6819.99	6480.26
Q8NF37	Q8NF37	PCAT1_HUMAN	LPCAT1	Lysophosphatidylcholine acyltransferase 1	1467.44	1207.47	1596.53	1068.13	1515.64	1121.4	1734.63	1194.85
Q8NFA0	Q8NFA0	UBP32_HUMAN	USP32	Ubiquitin carboxyl-terminal hydrolase 32	6305.61	6190.97	6908.01	8204.36	111074	108716	96150.7	96128.9
Q8NFF5;Q8NFF5-2;Q8NFF5-3	Q8NFF5;Q8NFF5-2;Q8NFF5-3	FAD1_HUMAN	FLAD1	FAD synthase	999.943	1148.32	966.256	1093.59	1131.73	837.503	713.794	1061.05
Q8NFH3	Q8NFH3	NUP43_HUMAN	NUP43	Nucleoporin Nup43	808.894	1203.55	687.45	1038.18	992.66	1228.93	478.309	1201.52
Q8NFH4	Q8NFH4	NUP37_HUMAN	NUP37	Nucleoporin Nup37	3235.18	3531.19	5046.6	4327.87	3459.84	3358.29	4875.24	4359.67
Q8NFQ8	Q8NFQ8	TOIP2_HUMAN	TOR1AIP2	Torsin-1A-interacting protein 2	1334.8	1675.36	1583.08	1061.55	1852.24	1663.92	1670.82	1266.23
Q8NFV4;Q8NFV4-4	Q8NFV4;Q8NFV4-4;Q8NFV4-6	ABHDB_HUMAN	ABHD11	Protein ABHD11	2015.69	2432.99	2699.16	2015.11	1944.57	1539.28	2307.58	2619.97
Q8NFW8	Q8NFW8;Q8NFW8-2	NEUA_HUMAN	CMAS	N-acylneuraminate cytidylyltransferase	1061.4	1442.01	1503.31	1077.16	1232.83	1441.88	1525.17	1627.4
Q8NH80	Q8NH80	O10D3_HUMAN	OR10D3	Olfactory receptor 10D3								487.098
Q8NHP8;Q8NHP8-2	Q8NHP8;Q8NHP8-2	PLBL2_HUMAN	PLBD2	Putative phospholipase B-like 2	785.645	1527.2	1098.65	1139.86	980.606	1105.47	1407.67	1072.87
Q8NHV4;Q8NHV4-2;Q8NHV4-3	Q8NHV4;Q8NHV4-2;Q8NHV4-3	NEDD1_HUMAN	NEDD1	Protein NEDD1	204.234	270.123	281.816	283.895	257.176	460.939	193.794	413.045
Q8NI36	Q8NI36	WDR36_HUMAN	WDR36	WD repeat-containing protein 36	777.968	469.483	1604.31	1197.35	1071.29	688.581	727.588	786.977
Q8TAA9;Q8TAA9-2	Q8TAA9;Q8TAA9-2	VANG1_HUMAN	VANGL1	Vang-like protein 1	625.275	933.423	759.537	534.876	707.682	462.037	1078.07	801.744
Q8TAC2;Q8TAC2-2	Q8TAC2;Q8TAC2-2	JOS2_HUMAN	JOSD2	Josephin-2					1872.61	849.516	1421.63	2025.52
Q8TAF3;Q8TAF3-3	Q8TAF3;Q8TAF3-3;Q8TAF3-4;Q8TAF3-5	WDR48_HUMAN	WDR48	WD repeat-containing protein 48	1615.44	1397.31	1329.79	1164.7	2735.54	2680	2752.97	2201.31
Q8TAT6;Q8TAT6-2	Q8TAT6;Q8TAT6-2	NPL4_HUMAN	NPLOC4	Nuclear protein localization protein 4 homolog	5763.38	4336.37	4419.93	4307.03	3443.36	3923.33	4165.64	4505.71
Q8TAX7	Q8TAX7	MUC7_HUMAN	MUC7	Mucin-7	1805.97	6298.42
Q8TB61;Q8TB61-2;Q8TB61-3	Q8TB61;Q8TB61-2;Q8TB61-3;Q8TB61-4;Q8TB61-5	S35B2_HUMAN	SLC35B2	Adenosine 3'-phospho 5'-phosphosulfate transporter 1	5875.04	6154.62	6549.95	6422.72	7617.52	7610.35	6794.34	6089.24
Q8TBA6	Q8TBA6	GOGA5_HUMAN	GOLGA5	Golgin subfamily A member 5				1222.62			1809.01	2246.8
Q8TBB5	Q8TBB5;Q8TBB5-3	KLDC4_HUMAN	KLHDC4	Kelch domain-containing protein 4	1680.87	1327.37	1900.6	1629.4	2115.58	2197.03	2473.05	2197.59
Q8TBC3	Q8TBC3	SHKB1_HUMAN	SHKBP1	SH3KBP1-binding protein 1	1203.57		982.626	1126.72	1133.53	1202.94		1583.25
Q8TBC4;Q8TBC4-2	Q8TBC4;Q8TBC4-2	UBA3_HUMAN	UBA3	NEDD8-activating enzyme E1 catalytic subunit	367.495		852.456	647.871		271.816		1080.13
Q8TBX8;Q8TBX8-3	Q8TBX8;Q8TBX8-3	PI42C_HUMAN	PIP4K2C	Phosphatidylinositol 5-phosphate 4-kinase type-2 gamma	391.742	451.506	393.186		430.713	478.431	683.226	408.176
Q8TC07;Q8TC07-2;Q8TC07-3	Q8TC07;Q8TC07-2;Q8TC07-3	TBC15_HUMAN	TBC1D15	TBC1 domain family member 15	2020.67	1691.06	1733.65	2333.04	2164.01	2292.75	1927.44	1984.46
Q8TC12	Q8TC12;Q8TC12-3	RDH11_HUMAN	RDH11	Retinol dehydrogenase 11	2334.42	1685.58	2002.23	2249.85	2360.62	2338.79	2524.14	2520.57
Q8TCJ2	Q8TCJ2	STT3B_HUMAN	STT3B	Dolichyl-diphosphooligosaccharide--protein glycosyltransferase subunit STT3B	4084.74	3318.95	4276.46	2959.18	4856.06	4307.21	4657.39	3942.44
Q8TCS8	Q8TCS8	PNPT1_HUMAN	PNPT1	Polyribonucleotide nucleotidyltransferase 1, mitochondrial	4314.35	5031.43	3919.23	4547.8	4643.11	5317.87	4332.6	4680.46
Q8TCT8	Q8TCT8	SPP2A_HUMAN	SPPL2A	Signal peptide peptidase-like 2A	609.368	1151.92	752.072	946.147	955.29	753.968	639.973	445.461
Q8TCT9;Q8TCT9-2;Q8TCT9-4;Q8TCT9-5	Q8TCT9;Q8TCT9-2;Q8TCT9-4;Q8TCT9-5	HM13_HUMAN	HM13	Minor histocompatibility antigen H13	2872.49	2958.67	2889.39	2218.43	2935.78	2717.31	2554.02	2450.31
Q8TCU6	Q8TCU6;Q8TCU6-2;Q8TCU6-3	PREX1_HUMAN	PREX1	Phosphatidylinositol 3,4,5-trisphosphate-dependent Rac exchanger 1 protein	4285.46	4953.77	5942.95	4262.36	4740.87	4230.52	4699.81	4409.98
Q8TCY9;Q8TCY9-2;Q8TCY9-3;Q8TCY9-4	Q8TCY9;Q8TCY9-2;Q8TCY9-3;Q8TCY9-4	URGCP_HUMAN	URGCP	Up-regulator of cell proliferation				332.443	451.68	554.126	554.266	517.691
Q8TDJ6;Q8TDJ6-3	Q8TDJ6;Q8TDJ6-3	DMXL2_HUMAN	DMXL2	DmX-like protein 2	169.119					321.643	225.681	220.495
Q8TDP1	Q8TDP1	RNH2C_HUMAN	RNASEH2C	Ribonuclease H2 subunit C	2116.16		2176.89	1868.15		2014.14		2898.88
Q8TDX7	Q8TDX7;Q9HC98;Q9HC98-4;Q9HC98-2;Q9HC98-3	NEK7_HUMAN	NEK7	Serine/threonine-protein kinase Nek7	885.089		573.386	572.78	1425.02	672.337	1236.14	1041.95
Q8TE77;Q8TE77-3	Q8TE77;Q8TE77-2;Q8TE77-3	SSH3_HUMAN	SSH3	Protein phosphatase Slingshot homolog 3	2539.21	2017.53	2581.36	2353.48	2259.45	1909.86	2126.17	2254.7
Q8TEA8	Q8TEA8	DTD1_HUMAN	DTD1	D-aminoacyl-tRNA deacylase 1	1426.91	2356.61	1708.26	1624.5	1147.84	2455.47	1244.26	2029.81
Q8TEB1-2	Q8TEB1;Q8TEB1-2	DCA11_HUMAN	DCAF11	Isoform 2 of DDB1- and CUL4-associated factor 11	1367.51	1579.42	1787.61	1780.57	1529.16	2576.45	3045.02	2976.7
Q8TEM1	Q8TEM1;Q8TEM1-2	PO210_HUMAN	NUP210	Nuclear pore membrane glycoprotein 210	3405.38	2870.82	3143.38	3008.29	3150.62	2851.6	3266.22	2635.56
Q8TEQ6	Q8TEQ6	GEMI5_HUMAN	GEMIN5	Gem-associated protein 5	3653.87	3592.47	3925.54	3422.89	2547.53	3587.82	3014.32	3499.19
Q8TEW0;Q8TEW0-11;Q8TEW0-2;Q8TEW0-3;Q8TEW0-4;Q8TEW0-5;Q8TEW0-6;Q8TEW0-7	Q8TEW0;Q8TEW0-10;Q8TEW0-11;Q8TEW0-2;Q8TEW0-3;Q8TEW0-4;Q8TEW0-5;Q8TEW0-6;Q8TEW0-7;Q8TEW0-8;Q8TEW0-9	PARD3_HUMAN	PARD3	Partitioning defective 3 homolog	642.061	804.358	862.832	555.733	1028.43	1098.3	1130.53	745.467
Q8TEX9;Q8TEX9-2	Q8TEX9;Q8TEX9-2	IPO4_HUMAN	IPO4	Importin-4	5413.87	5189.33	5273.56	5322.75	6601.56	4475.77	5853.57	5588.59
Q8TEY7;Q8TEY7-2;Q8TEY7-3	Q8TEY7;Q8TEY7-2;Q8TEY7-3	UBP33_HUMAN	USP33	Ubiquitin carboxyl-terminal hydrolase 33	419.66				1585.44	1484.35	1333.53	1239.19
Q8WTV0;Q8WTV0-2;Q8WTV0-3;Q8WTV0-4;Q8WTV0-5	Q8WTV0;Q8WTV0-2;Q8WTV0-3;Q8WTV0-4;Q8WTV0-5	SCRB1_HUMAN	SCARB1	Scavenger receptor class B member 1	2263.9	2468.1	1946.06	2695.26	3250.78	2529.99	3066.94	2541.26
Q8WTW3	Q8WTW3	COG1_HUMAN	COG1	Conserved oligomeric Golgi complex subunit 1	833.452	319.024	832.044	892.197	1024.41	811.661	1265.61	809.864
Q8WU10;Q8WU10-2	Q8WU10;Q8WU10-2	PYRD1_HUMAN	PYROXD1	Pyridine nucleotide-disulfide oxidoreductase domain-containing protein 1	774.105			430.672				738.034
Q8WU90	Q8WU90	ZC3HF_HUMAN	ZC3H15	Zinc finger CCCH domain-containing protein 15	1199.95	905.339	1332.09	1273.55	1297.64	900.787	2018.19	918.341
Q8WUD1	Q8WUD1;Q8WUD1-2	RAB2B_HUMAN	RAB2B	Ras-related protein Rab-2B	853.589	784.649	711.42	430.892		1078.66	437.062	677.621
Q8WUD6;Q8WUD6-2	Q8WUD6;Q8WUD6-2	CHPT1_HUMAN	CHPT1	Cholinephosphotransferase 1	2795.03	3347.48	1766.44	2717.03	2430.09	2179.19	2624.04	1945.91
Q8WUH2	Q8WUH2	TGFA1_HUMAN	TGFBRAP1	Transforming growth factor-beta receptor-associated protein 1	2790.1	3624.27	2155.59	2965.78	3374.32	2527.99	3013.99	1500.92
Q8WUM4	Q8WUM4;Q8WUM4-2	PDC6I_HUMAN	PDCD6IP	Programmed cell death 6-interacting protein	6727.95	5457.85	7038.66	5577.47	5793.77	5741.56	6325.73	6457.27
Q8WUY1	Q8WUY1	THEM6_HUMAN	THEM6	Protein THEM6	4596.53	7182.63	7487.59	8208.39	6604.6	4940.38	6061.33	6249.8
Q8WVB6;Q8WVB6-2	Q8WVB6;Q8WVB6-2;Q8WVB6-3	CTF18_HUMAN	CHTF18	Chromosome transmission fidelity protein 18 homolog	468.413	721.997	615.207	591.03	539.406	619.339	466.786	542.955
Q8WVJ2	Q8WVJ2	NUDC2_HUMAN	NUDCD2	NudC domain-containing protein 2	4179.41	2576.33	3265.66	2410.73	2803.85	1655.96	3122.46	2660.45
Q8WVM8;Q8WVM8-2;Q8WVM8-3	Q8WVM8;Q8WVM8-2;Q8WVM8-3	SCFD1_HUMAN	SCFD1	Sec1 family domain-containing protein 1	1692.39	1050.33	1620.17	1057.49	1940.48	875.383	704.054	1454.98
Q8WVV9;Q8WVV9-4;Q8WVV9-5	Q8WVV9;Q8WVV9-3;Q8WVV9-2;Q8WVV9-4;Q8WVV9-5	HNRLL_HUMAN	HNRNPLL	Heterogeneous nuclear ribonucleoprotein L-like	2738.5	3861.31	2826.32	3435.83	3586.18	3359.7	2764.52	3596.55
Q8WVX9	Q8WVX9	FACR1_HUMAN	FAR1	Fatty acyl-CoA reductase 1	2476.16	2725.71	2679.39	3077.53	2879.5	2624.74	2331.09	2228.41
Q8WVY7	Q8WVY7	UBCP1_HUMAN	UBLCP1	Ubiquitin-like domain-containing CTD phosphatase 1	2430.99	1877.41	2140.03	2003.17	1747.91	1650.77	2819.02	2015.38
Q8WVZ9	Q86V97;Q8WVZ9	KBTB7_HUMAN	KBTBD7	Kelch repeat and BTB domain-containing protein 7	900.319	1187.63	1030.53	1104.07	1115.54	938.651	1507.38	1623.65
Q8WW12;Q8WW12-2	Q8WW12;Q8WW12-2	PCNP_HUMAN	PCNP	PEST proteolytic signal-containing nuclear protein	4970.12	5532.68	3462.32	4159.63	3768.68	4140.27	4641.67	3113.43
Q8WW59	Q8WW59	SPRY4_HUMAN	SPRYD4	SPRY domain-containing protein 4	3918.8	5161.25	3658.81	5295.13	4922.66	5326.35	4348.5	4959.57
Q8WWC4	Q8WWC4	MAIP1_HUMAN	MAIP1	m-AAA protease-interacting protein 1, mitochondrial	996.906	2197.12	1616.67	1541.48	1132.23	1482.41	1244.45	1337.74
Q8WWY3	Q8WWY3	PRP31_HUMAN	PRPF31	U4/U6 small nuclear ribonucleoprotein Prp31	3556.04	2694.69	3338.84	2170.84	3170.26	2435.58	4501.19	2307.3
Q8WWZ7-3	Q8WWZ7-3	ABCA5_HUMAN	ABCA5	Isoform 3 of Cholesterol transporter ABCA5				923.436		1398.33	876.475	1609.65
Q8WX92;Q8WX92-2	Q8WX92;Q8WX92-2	NELFB_HUMAN	NELFB	Negative elongation factor B	529.165	494.14	507.386	455.56	925.722	469.165	738.92	486.362
Q8WXF1;Q8WXF1-2	Q8WXF1;Q8WXF1-2	PSPC1_HUMAN	PSPC1	Paraspeckle component 1	5980.43	4624.01	5265.64	5237.27	4514.1	4311.91	5349.76	4125.77
Q8WXG6-2;Q8WXG6-3;Q8WXG6-4;Q8WXG6-5;Q8WXG6-6;Q8WXG6-8	Q8WXG6-2;Q8WXG6-3;Q8WXG6-4;Q8WXG6-5;Q8WXG6-6;Q8WXG6-8	MADD_HUMAN	MADD	Isoform 2 of MAP kinase-activating death domain protein	1105.99	1488.51	1343.7	967.81	1147.91	976.085	1074.45	1121.75
Q8WY54	Q8WY54	PPM1E_HUMAN	PPM1E	Protein phosphatase 1E	2598.67	3720.76	3029.06	2610.18	2770.73	2664.73	3364.01	3117
Q8WZ42;Q8WZ42-11;Q8WZ42-12;Q8WZ42-13;Q8WZ42-2;Q8WZ42-4;Q8WZ42-5;Q8WZ42-7;Q8WZ42-8	Q8WZ42;Q8WZ42-10;Q8WZ42-11;Q8WZ42-12;Q8WZ42-13;Q8WZ42-2;Q8WZ42-3;Q8WZ42-4;Q8WZ42-5;Q8WZ42-7;Q8WZ42-8;Q8WZ42-9	TITIN_HUMAN	TTN	Titin	10420	7341.51	9417.34	9428.71	9097.84	6309.4	9845.95	7950.77
Q92499	Q92499;Q92499-2	DDX1_HUMAN	DDX1	ATP-dependent RNA helicase DDX1	8884.51	9693.45	8755.48	9500.85	7700.39	9911.56	8290.51	9590
Q92508	Q92508	PIEZ1_HUMAN	PIEZO1	Piezo-type mechanosensitive ion channel component 1		477.561					420.977
Q92522	Q92522	H1X_HUMAN	H1-10	Histone H1.10		231.722	228.294	226.481	121.937	339.698	354.21	189.039
Q92526	Q92526;Q92526-3	TCPW_HUMAN	CCT6B	T-complex protein 1 subunit zeta-2	3972.97	2820.96	3391.31		2713.17	3167.1	3877.14	2003.93
Q92530	Q92530	PSMF1_HUMAN	PSMF1	Proteasome inhibitor PI31 subunit	1224.92	1771.89	1539.73	1250.63		1508.53	1058.31	2067.98
Q92538;Q92538-2;Q92538-3	Q92538;Q92538-3;Q92538-2	GBF1_HUMAN	GBF1	Golgi-specific brefeldin A-resistance guanine nucleotide exchange factor 1				249.805	508.832	321.451		335.167
Q92541	Q92541	RTF1_HUMAN	RTF1	RNA polymerase-associated protein RTF1 homolog	1583.84	564.29	1366.35	1134.95	968.218	1837.59	1633.78	1594.59
Q92544	Q92544	TM9S4_HUMAN	TM9SF4	Transmembrane 9 superfamily member 4	4687.26	4473.67	4763.14	4656.47	5147.28	5624.82	5111.17	5866.59
Q92552;Q92552-2	Q92552;Q92552-2	RT27_HUMAN	MRPS27	Small ribosomal subunit protein mS27	1992.51	1582.86	1902.29	2316.72	2270.69	1673.06	2146.62	2178.63
Q92560	Q92560	BAP1_HUMAN	BAP1	Ubiquitin carboxyl-terminal hydrolase BAP1	309.176				4521.49	4315.14	3864.82	3129
Q92572	Q92572	AP3S1_HUMAN	AP3S1	AP-3 complex subunit sigma-1	2457.13	2049.05	1910.23	2684.38	2338.2	1890.35	1870.35	1874.26
Q92575	Q92575	UBXN4_HUMAN	UBXN4	UBX domain-containing protein 4		165.063	405.852		288.936	349.569		371.427
Q92597;Q92597-2;Q92597-3	Q92597;Q92597-2;Q92597-3	NDRG1_HUMAN	NDRG1	Protein NDRG1	628.595	764.483	999.851	704.994	309.538	647.37	414.156	592.607
Q92598;Q92598-2	Q92598;Q92598-2;Q92598-3;Q92598-4	HS105_HUMAN	HSPH1	Heat shock protein 105 kDa	23703.5	21867	22179.1	22962.3	21583.8	22040.3	21266.9	23825.8
Q92599;Q92599-2;Q92599-3;Q92599-4	Q92599;Q92599-2;Q92599-3;Q92599-4	SEPT8_HUMAN	SEPTIN8	Septin-8	2412.03	3490.7	2927.02	2721.24	2823.03	3126.41	2348.07	2575.22
Q92615	Q92615	LAR4B_HUMAN	LARP4B	La-related protein 4B	127.319	339.558	185.512	452.16			323.775
Q92616	Q92616	GCN1_HUMAN	GCN1	Stalled ribosome sensor GCN1	11005.5	9275.21	12474.2	9879.27	10758	9233.11	10934.1	9753.17
Q92620	Q92620	PRP16_HUMAN	DHX38	Pre-mRNA-splicing factor ATP-dependent RNA helicase PRP16	1781.43	1964.19	1718.76	1982.73	1683.4	1343.67	1976.91	2091.02
Q92621	Q92621	NU205_HUMAN	NUP205	Nuclear pore complex protein Nup205	606.694	1172.11	1559.03	1258.19	1618.63	803.832	1251.37	926.941
Q92643	Q92643	GPI8_HUMAN	PIGK	GPI-anchor transamidase	1945	2066.67	2370.99	1976.36	2501.06	2360.34	2395.12	1650.87
Q92685;Q92685-2	Q92685;Q92685-2	ALG3_HUMAN	ALG3	Dol-P-Man:Man(5)GlcNAc(2)-PP-Dol alpha-1,3-mannosyltransferase	335.262			453.757				445.161
Q92688;Q92688-2	P39687;Q92688;Q92688-2	AN32B_HUMAN	ANP32B	Acidic leucine-rich nuclear phosphoprotein 32 family member B	2227.11	5585.84	1558.56	3701.67	1920.44	1627.48	2460.57	1364.54
Q92696	Q92696	PGTA_HUMAN	RABGGTA	Geranylgeranyl transferase type-2 subunit alpha	2634.52	3418.96	3019.02	3192.5	3370.54	2799.92	3645.66	2337.49
Q92734;Q92734-2;Q92734-3;Q92734-4	Q92734;Q92734-2;Q92734-3;Q92734-4	TFG_HUMAN	TFG	Protein TFG	2573.05		1933.38	2934.18	3109.94	1492.92	2196.91	1921.91
Q92747	Q92747	ARC1A_HUMAN	ARPC1A	Actin-related protein 2/3 complex subunit 1A	3240.37	3784.71	4415.32	4249.33	5433.92	5014.87	5882.45	3535.98
Q92759	Q92759	TF2H4_HUMAN	GTF2H4	General transcription factor IIH subunit 4			97.6393	236.56
Q92769;Q92769-3	Q92769;Q92769-3	HDAC2_HUMAN	HDAC2	Histone deacetylase 2	23871.8	25305.9	21642.7	25772.4	23282	26046.5	25908.7	27569.3
Q92804;Q92804-2	Q92804;Q92804-2	RBP56_HUMAN	TAF15	TATA-binding protein-associated factor 2N	310.236			514.393
Q92820	Q92820	GGH_HUMAN	GGH	Gamma-glutamyl hydrolase	1542.66	1971.16	1556.3	959.786	1327.51	631.248	1198.7	1304.11
Q92841;Q92841-1;Q92841-2;Q92841-3	Q92841;Q92841-1;Q92841-2;Q92841-3	DDX17_HUMAN	DDX17	Probable ATP-dependent RNA helicase DDX17	4144.59	3308.97	4500.54	4188.98	4313.95	3785.38	4683.61	4186.94
Q92878;Q92878-2;Q92878-3	Q92878;Q92878-2;Q92878-3	RAD50_HUMAN	RAD50	DNA repair protein RAD50	3795.73	3883.9	4220.11	4049.38	4006.8	4558.6	4599.01	5124.8
Q92879;Q92879-2;Q92879-3;Q92879-4;Q92879-5;Q92879-6	O95319;Q92879;O95319-2;O95319-3;O95319-4;O95319-5;Q92879-2;Q92879-3;Q92879-4;Q92879-5;Q92879-6	CELF1_HUMAN	CELF1	CUGBP Elav-like family member 1	1735.12	2555.35	2864.24	2749.83	2747.81	1836.25	2975.49	1307.02
Q92888;Q92888-2;Q92888-3;Q92888-4	Q92888;Q92888-2;Q92888-3;Q92888-4	ARHG1_HUMAN	ARHGEF1	Rho guanine nucleotide exchange factor 1	2251.47	2201.05	2920.6	2495.9	2284.47	2062.35	2318.77	2367.04
Q92890;Q92890-1	Q92890;Q92890-1;Q92890-3	UFD1_HUMAN	UFD1	Ubiquitin recognition factor in ER-associated degradation protein 1	2072.81	2080.39	2272.07	1920.91	2318.97	2694.44	2531.67	3096.98
Q92896;Q92896-2;Q92896-3	Q92896;Q92896-2;Q92896-3	GSLG1_HUMAN	GLG1	Golgi apparatus protein 1	2701.39	1877.16	2748.01	2064.96	2191.96	1574.89	2260.68	2155.49
Q92900;Q92900-2	Q92900;Q92900-2	RENT1_HUMAN	UPF1	Regulator of nonsense transcripts 1	8725.5	9126.87	8970.33	8794.91	9705.06	8221.81	9003.85	7952.45
Q92905	Q92905	CSN5_HUMAN	COPS5	COP9 signalosome complex subunit 5	866.499	1497.4	742.966	1187.9	938.872	1019.38	964.856	1240.93
Q92930	Q92930	RAB8B_HUMAN	RAB8B	Ras-related protein Rab-8B	504.049	755.019	652.663	855.622		987.015	938.943	1197
Q92945	Q92945	FUBP2_HUMAN	KHSRP	Far upstream element-binding protein 2	1982.5	2342.61	1546.41	2077.38	1869.6	1293.66	2349.7	1318.5
Q92947	Q92947;Q92947-2	GCDH_HUMAN	GCDH	Glutaryl-CoA dehydrogenase, mitochondrial	5105.54	4463.34	4820.89	4685.42	5039.05	4556.41	5163.55	4835.51
Q92973;Q92973-2	O14787-2;Q92973;Q92973-2;Q92973-3	TNPO1_HUMAN	TNPO1	Transportin-1	2695	2013.21	2531.13	1912.78	2747.35	2348.8	2433.9	1302.98
Q92979	Q92979	NEP1_HUMAN	EMG1	Ribosomal RNA small subunit methyltransferase NEP1	4470.38	4924.35	5945.16	4388.75	6474.35	5256.06	6084.86	5107.35
Q92989	Q92989	CLP1_HUMAN	CLP1	Polyribonucleotide 5'-hydroxyl-kinase Clp1	2619.69	2364.29	2289.99	1757.33	1657.86	2791.38	2209.82	2582.98
Q92995;Q92995-2	Q92995;Q92995-2	UBP13_HUMAN	USP13	Ubiquitin carboxyl-terminal hydrolase 13	1106.83	1827.86	1406.18	1005.66	2205.04	1256.22	1426.39	1852.73
Q93008;Q93008-3	O00507;Q93008;O00507-2;Q93008-3	USP9X_HUMAN	USP9X	Probable ubiquitin carboxyl-terminal hydrolase FAF-X	2287.91	2679.91	2424.31	3482.66	47875.8	50972.3	39865.5	40069
Q93009;Q93009-3	Q93009;Q93009-3	UBP7_HUMAN	USP7	Ubiquitin carboxyl-terminal hydrolase 7	7723.18	9871.59	5985.81	12040.3	178568	176560	152619	153745
Q93034	Q93034	CUL5_HUMAN	CUL5	Cullin-5	6669.78	6753.13	8754.01	8202.39	9774.05	7772.43	6553.63
Q93050;Q93050-1;Q93050-3	Q93050;Q93050-1;Q93050-3	VPP1_HUMAN	ATP6V0A1	V-type proton ATPase 116 kDa subunit a 1	1837.44	2154.64	1845.92	1646.9	1725.46	2039.84	2118.44	1349.01
Q93074;Q93074-2;Q93074-3	Q93074;Q93074-2;Q93074-3	MED12_HUMAN	MED12	Mediator of RNA polymerase II transcription subunit 12	562.925	394.587		392.743		192.107	385.779	174.496
Q93084;Q93084-1;Q93084-3;Q93084-4;Q93084-5;Q93084-6;Q93084-7	Q93084;Q93084-1;Q93084-3;Q93084-4;Q93084-5;Q93084-6;Q93084-7	AT2A3_HUMAN	ATP2A3	Sarcoplasmic/endoplasmic reticulum calcium ATPase 3	726.21	1287.32	743.643	815.177	1113.88	844.773	907.145	703.656
Q93100-3;Q93100-4	Q93100;Q93100-4;Q93100-2;Q93100-3	KPBB_HUMAN	PHKB	Isoform 3 of Phosphorylase b kinase regulatory subunit beta	1412.85	2666.33	1522.69	2909.11	2194.36	1647.93	1697.25	2119.94
Q969E2;Q969E2-2	Q969E2;Q969E2-2	SCAM4_HUMAN	SCAMP4	Secretory carrier-associated membrane protein 4	2129.6	1903.37	2185.63	2104.68	2738.42	1902.62	1948.76	1860.17
Q969F9;Q969F9-2	Q969F9;Q969F9-2	HPS3_HUMAN	HPS3	BLOC-2 complex member HPS3	820.963	519.789	530.586	910.606	971.926	924.61	662.842	1023
Q969H8	Q969H8	MYDGF_HUMAN	MYDGF	Myeloid-derived growth factor	5560.65	7171.89	7372.72	9049.83	9903.51	11188.7	9442.06	10236.6
Q969L2	Q969L2	MAL2_HUMAN	MAL2	Protein MAL2	1662.66	800.442	1467.91	1859.28	1894.33	1470.67	2302.16	1458.65
Q969M3;Q969M3-3	Q969M3;Q969M3-2;Q969M3-3	YIPF5_HUMAN	YIPF5	Protein YIPF5	1569.55	2038.54	1758.37	1774.16	2554.71	1981.4	1851.56	2249.11
Q969N2;Q969N2-2;Q969N2-4;Q969N2-5	Q969N2;Q969N2-2;Q969N2-3;Q969N2-4;Q969N2-5;Q969N2-6	PIGT_HUMAN	PIGT	GPI transamidase component PIG-T	1390.82	1991.15		1777.34	1642.42	2003.42	1959.79	1763.72
Q969Q0	P83881;Q969Q0	RL36L_HUMAN	RPL36AL	Ribosomal protein eL42-like	5351.48	5629.78	9396.14	8527.3	11528.2	7962.99	8510.66	5424.1
Q969U7;Q969U7-2	Q969U7;Q969U7-2	PSMG2_HUMAN	PSMG2	Proteasome assembly chaperone 2	4708.24	3881.87	3850.19	4636.68	4182.1	3521.05	3610.41	3877.19
Q969V3;Q969V3-2	Q969V3;Q969V3-2	NCLN_HUMAN	NCLN	BOS complex subunit NCLN	1158.71	1107.69	1726.47	1552.59	1611.07	1746.29	1407.86	1692.83
Q969X5;Q969X5-2	Q969X5;Q969X5-2	ERGI1_HUMAN	ERGIC1	Endoplasmic reticulum-Golgi intermediate compartment protein 1	3118.17	3071.52	2920.89	2752.72	2440.98	3513.08	3221.83	2361.41
Q969Z0	Q969Z0;Q969Z0-2	FAKD4_HUMAN	TBRG4	FAST kinase domain-containing protein 4	2547.77	2428.82	2285.49	2646.24	2766.62	2599.77	2657.47	3053.77
Q96A33;Q96A33-2	Q96A33;Q96A33-2	CCD47_HUMAN	CCDC47	PAT complex subunit CCDC47	1453.12	1094.98	1565.16	1128.02	1571.05	1418.23	1468.61	1392.26
Q96A35	Q96A35	RM24_HUMAN	MRPL24	Large ribosomal subunit protein uL24m	1544.61	1739.71	2221.09	2001.29	1904.63	1605.57	2526.33	1265.39
Q96A65	Q96A65	EXOC4_HUMAN	EXOC4	Exocyst complex component 4	355.801	562.347	763.253	763.269	710.733	608.326	350.995	608.846
Q96AB3;Q96AB3-2;Q96AB3-3	Q96AB3;Q96AB3-2;Q96AB3-3	ISOC2_HUMAN	ISOC2	Isochorismatase domain-containing protein 2	1188.09	1403.57	1109.65	1370.75	1034.33	1398.77	1343.94	901.748
Q96AC1;Q96AC1-2;Q96AC1-3	Q96AC1;Q9BQL6;Q96AC1-2;Q96AC1-3;Q9BQL6-2;Q9BQL6-4	FERM2_HUMAN	FERMT2	Fermitin family homolog 2	1258.12	1008.38	962.752	1428.54	1685.62	1025.79	1199.88	1332.69
Q96AE4;Q96AE4-2	Q96AE4;Q96AE4-2	FUBP1_HUMAN	FUBP1	Far upstream element-binding protein 1	1792.22	2941.28	1839.57	3341.08	1726.05	1541.84	2365.11	2202.3
Q96AG4	Q96AG4	LRC59_HUMAN	LRRC59	Leucine-rich repeat-containing protein 59	1314.49	2365.72	1366.75	1200.6	1635.44	621.844	1086.32	922.237
Q96AH0;Q96AH0-2;Q96AH0-3;Q9BQ15	Q96AH0;Q9BQ15;Q96AH0-2;Q96AH0-3	SOSB1_HUMAN;SOSB2_HUMAN	NABP1;NABP2	SOSS complex subunit B2	2173.36	1669.27	1950.8	1468.03	2094.19	1826.67	2201.3	1237.85
Q96AX1	Q96AX1	VP33A_HUMAN	VPS33A	Vacuolar protein sorting-associated protein 33A	597.252	862.359	831.82	807.449	911.871		797.525	1198.47
Q96AY3	Q96AY3	FKB10_HUMAN	FKBP10	Peptidyl-prolyl cis-trans isomerase FKBP10	1437.38	1420.98	1407.46	862.65	894.768	865.573	1410.75	1477.01
Q96B26	Q96B26	EXOS8_HUMAN	EXOSC8	Exosome complex component RRP43	5719.02	6168.79	4480.16	4987.81	4463.3	5698.14	4531.76	4243.45
Q96BI1	Q96BI1	S22AI_HUMAN	SLC22A18	Solute carrier family 22 member 18	448.981	583.052	819.792	465.609	1085.09	1267.62	777.848	819.515
Q96BJ3	Q96BJ3;Q96BJ3-3	AIDA_HUMAN	AIDA	Axin interactor, dorsalization-associated protein	1875.73	3011.04	1755.28	2528.69	1237.38	967.218	926.356	861.971
Q96BM9	Q96BM9	ARL8A_HUMAN	ARL8A	ADP-ribosylation factor-like protein 8A	4245.25	4557.98	4141	4371.66	4979.22	4343.94	4734.29	3822.31
Q96BP3	Q96BP3	PPWD1_HUMAN	PPWD1	Peptidylprolyl isomerase domain and WD repeat-containing protein 1	2037.65	1517.22	1266.91	1715.67	1316.08	1832.92	1999.4	1533.87
Q96BW9;Q96BW9-2;Q96BW9-3	Q96BW9;Q96BW9-2;Q96BW9-3	TAM41_HUMAN	TAMM41	Phosphatidate cytidylyltransferase, mitochondrial	715.794	1056.32	614.336	447.948	733.724	250.54	699.156	702.2
Q96BY7	Q96BY7	ATG2B_HUMAN	ATG2B	Autophagy-related protein 2 homolog B	539.073	728.789	845.74	682.113	1061.09	989.907	1002.05	1078.84
Q96C86	Q96C86	DCPS_HUMAN	DCPS	m7GpppX diphosphatase	1849.83	1901.58	2140.2	2176.42	1904.97	1502.03	1886.44	1972.82
Q96CM8;Q96CM8-2;Q96CM8-3;Q96CM8-4	Q96CM8;Q96CM8-2;Q96CM8-3;Q96CM8-4	ACSF2_HUMAN	ACSF2	Medium-chain acyl-CoA ligase ACSF2, mitochondrial	2300.47	2120.89	1339.55		1802.79	1265.47	1609.97	1555.84
Q96CN7	Q96CN7	ISOC1_HUMAN	ISOC1	Isochorismatase domain-containing protein 1	24729.8	31073.4	25487.1	29597	28600.6	30080.8	29545	27933.6
Q96CS3	Q96CS3	FAF2_HUMAN	FAF2	FAS-associated factor 2	1397.34	2174.53	1679.44	1200.44	1590.5	1727.16	1715.04	1816.02
Q96CW1;Q96CW1-2	Q96CW1;Q96CW1-2	AP2M1_HUMAN	AP2M1	AP-2 complex subunit mu	10093.2	9619.39	9991.33	10661.5	11174.4	11450.4	11298.4	9877.55
Q96CW5;Q96CW5-2	Q96CW5;Q96CW5-2	GCP3_HUMAN	TUBGCP3	Gamma-tubulin complex component 3	884.793	487.184	1133.95	898.517	532.359	818.153	1039.17	614.678
Q96D46	Q96D46	NMD3_HUMAN	NMD3	60S ribosomal export protein NMD3	2541.77	3721.86	3070.86	3853.62	4444.58	3434.3	3507.47	4395.63
[truncated: 656 more rows]
