# Supplementary material
Source: Research Square preprint supplement (doi:10.21203/rs.3.rs-9106698/v1)
Supplement: Supplementary file 4 [file 6d9d193cba5bce9b7cab1845.xlsx]

## Sheet: 20250520_USP47_UptakeSummaryTab
Protein state	Start	End	Sequence	Peptide mass (Da)	Retention time (min)	HDX time (min)	Uptake (D)	Uptake SD (D)
APO-USP47	2	12	VPGEENQLVPK	1208.64	4.3129	0	0	0		0.0359129
APO-USP47	2	12	VPGEENQLVPK	1208.64	4.3148	30	4.68	0.001
APO-USP47	2	12	VPGEENQLVPK	1208.64	4.322	600	4.852	0
APO-USP47	2	12	VPGEENQLVPK	1208.64	4.3071	3600	4.739	0.156
APO-USP47	38	54	AEEPRVLCIIQDTTNSK	1915.97	6.313	0	0	0
APO-USP47	38	54	AEEPRVLCIIQDTTNSK	1915.97	6.2166	30	11.872	0.038
APO-USP47	38	54	AEEPRVLCIIQDTTNSK	1915.97	6.3102	600	12.948	0
APO-USP47	38	54	AEEPRVLCIIQDTTNSK	1915.97	6.3097	3600	13.263	0.122
APO-USP47	45	73	CIIQDTTNSKTVNERITLNLPASTPVRKL	3224.76	5.5149	0	0	0
APO-USP47	45	73	CIIQDTTNSKTVNERITLNLPASTPVRKL	3224.76	5.5298	30	8.664	0.002
APO-USP47	45	73	CIIQDTTNSKTVNERITLNLPASTPVRKL	3224.76	5.5247	600	9.535	0
APO-USP47	45	73	CIIQDTTNSKTVNERITLNLPASTPVRKL	3224.76	5.5151	3600	10.726	0
APO-USP47	60	75	ITLNLPASTPVRKLFE	1798.04	6.6533	0	0	0
APO-USP47	60	75	ITLNLPASTPVRKLFE	1798.04	6.6593	30	1.895	0.025
APO-USP47	60	75	ITLNLPASTPVRKLFE	1798.04	6.6674	600	2.118	0
APO-USP47	60	75	ITLNLPASTPVRKLFE	1798.04	6.6956	3600	2.819	0
APO-USP47	89	98	DLVWGNGINT	1087.53	6.5323	0	0	0
APO-USP47	89	98	DLVWGNGINT	1087.53	6.5239	30	3.403	0.017
APO-USP47	89	98	DLVWGNGINT	1087.53	6.5298	600	3.91	0
APO-USP47	89	98	DLVWGNGINT	1087.53	6.5416	3600	4.129	0.062
APO-USP47	89	110	DLVWGNGINTADMAPLDHTSDK	2369.1	6.4443	0	0	0
APO-USP47	89	110	DLVWGNGINTADMAPLDHTSDK	2369.1	6.5162	30	7.145	0.032
APO-USP47	89	110	DLVWGNGINTADMAPLDHTSDK	2369.1	6.4877	600	8.587	0
APO-USP47	89	110	DLVWGNGINTADMAPLDHTSDK	2369.1	6.4595	3600	9.008	0.191
APO-USP47	89	115	DLVWGNGINTADMAPLDHTSDKSLLDA	2868.36	7.0505	0	0	0
APO-USP47	89	115	DLVWGNGINTADMAPLDHTSDKSLLDA	2868.36	7.0221	30	7.438	0.135
APO-USP47	89	115	DLVWGNGINTADMAPLDHTSDKSLLDA	2868.36	7.0291	600	9.673	0
APO-USP47	89	115	DLVWGNGINTADMAPLDHTSDKSLLDA	2868.36	7.0564	3600	10.409	0.278
APO-USP47	90	110	LVWGNGINTADMAPLDHTSDK	2254.07	6.2213	0	0	0
APO-USP47	90	110	LVWGNGINTADMAPLDHTSDK	2254.07	6.2244	30	7.323	0.061
APO-USP47	90	110	LVWGNGINTADMAPLDHTSDK	2254.07	6.2525	600	8.797	0
APO-USP47	90	110	LVWGNGINTADMAPLDHTSDK	2254.07	6.2254	3600	8.96	0.185
APO-USP47	99	110	ADMAPLDHTSDK	1299.58	3.81	0	0	0
APO-USP47	99	110	ADMAPLDHTSDK	1299.58	3.8144	30	2.521	0.098
APO-USP47	99	110	ADMAPLDHTSDK	1299.58	3.8205	600	3.622	0
APO-USP47	99	110	ADMAPLDHTSDK	1299.58	3.7376	3600	3.701	0
APO-USP47	99	113	ADMAPLDHTSDKSLL	1612.78	5.5915	0	0	0
APO-USP47	99	113	ADMAPLDHTSDKSLL	1612.78	5.5786	30	2.09	0.15
APO-USP47	99	113	ADMAPLDHTSDKSLL	1612.78	5.5668	600	3.621	0
APO-USP47	99	113	ADMAPLDHTSDKSLL	1612.78	5.523	3600	4.011	0.124
APO-USP47	114	138	DANFEPGKKNFLHLTDKDGEQPQIL	2853.43	5.8707	0	0	0
APO-USP47	114	138	DANFEPGKKNFLHLTDKDGEQPQIL	2853.43	5.8405	30	5.021	0.189
APO-USP47	114	138	DANFEPGKKNFLHLTDKDGEQPQIL	2853.43	5.8242	600	6.834	0
APO-USP47	114	138	DANFEPGKKNFLHLTDKDGEQPQIL	2853.43	5.8282	3600	6.807	0.079
APO-USP47	116	138	NFEPGKKNFLHLTDKDGEQPQIL	2667.37	5.7368	0	0	0
APO-USP47	116	138	NFEPGKKNFLHLTDKDGEQPQIL	2667.37	5.719	30	3.979	0
APO-USP47	116	138	NFEPGKKNFLHLTDKDGEQPQIL	2667.37	5.7111	600	6.022	0
APO-USP47	116	138	NFEPGKKNFLHLTDKDGEQPQIL	2667.37	5.7483	3600	5.331	0.087
APO-USP47	124	138	FLHLTDKDGEQPQIL	1752.9	6.0497	0	0	0
APO-USP47	124	138	FLHLTDKDGEQPQIL	1752.9	6.0491	30	3.131	0.066
APO-USP47	124	138	FLHLTDKDGEQPQIL	1752.9	6.0528	600	4.259	0
APO-USP47	124	138	FLHLTDKDGEQPQIL	1752.9	6.0445	3600	4.165	0.05
APO-USP47	139	152	LEDSSAGEDSVHDR	1515.64	3.0108	0	0	0
APO-USP47	139	152	LEDSSAGEDSVHDR	1515.64	3.0144	30	3.892	0.018
APO-USP47	139	152	LEDSSAGEDSVHDR	1515.64	3.0283	600	4.022	0
APO-USP47	139	152	LEDSSAGEDSVHDR	1515.64	3.0078	3600	3.852	0.147
APO-USP47	139	153	LEDSSAGEDSVHDRF	1662.71	4.5744	0	0	0
APO-USP47	139	153	LEDSSAGEDSVHDRF	1662.71	4.5778	30	4.845	0.023
APO-USP47	139	153	LEDSSAGEDSVHDRF	1662.71	4.5816	600	5.198	0
APO-USP47	139	153	LEDSSAGEDSVHDRF	1662.71	4.5855	3600	5	0.106
APO-USP47	142	152	SSAGEDSVHDR	1158.49	2.2766	0	0	0
APO-USP47	142	152	SSAGEDSVHDR	1158.49	2.311	30	3.258	0.11
APO-USP47	142	152	SSAGEDSVHDR	1158.49	2.2739	600	3.502	0
APO-USP47	142	152	SSAGEDSVHDR	1158.49	2.2877	3600	3.333	0.1
APO-USP47	142	153	SSAGEDSVHDRF	1305.56	4.162	0	0	0
APO-USP47	142	153	SSAGEDSVHDRF	1305.56	4.1684	30	3.74	0.009
APO-USP47	142	153	SSAGEDSVHDRF	1305.56	4.1978	600	3.99	0
APO-USP47	142	153	SSAGEDSVHDRF	1305.56	4.1595	3600	3.856	0.041
APO-USP47	169	173	YVSQS	582.265	2.287	0	0	0
APO-USP47	169	173	YVSQS	582.265	2.3043	30	1.749	0
APO-USP47	169	173	YVSQS	582.265	2.3027	600	1.808	0
APO-USP47	169	173	YVSQS	582.265	2.3033	3600	1.78	0.011
APO-USP47	169	174	YVSQSY	745.328	3.9623	0	0	0
APO-USP47	169	174	YVSQSY	745.328	3.9564	30	2.417	0.097
APO-USP47	169	174	YVSQSY	745.328	3.967	600	2.648	0
APO-USP47	169	174	YVSQSY	745.328	3.9808	3600	2.48	0.139
APO-USP47	169	175	YVSQSYS	832.36	3.5858	0	0	0
APO-USP47	169	175	YVSQSYS	832.36	3.5892	30	3.219	0.07
APO-USP47	169	175	YVSQSYS	832.36	3.5786	600	3.425	0
APO-USP47	169	175	YVSQSYS	832.36	3.5903	3600	3.318	0.043
APO-USP47	169	180	YVSQSYSYSSIL	1395.66	6.7132	0	0	0
APO-USP47	169	180	YVSQSYSYSSIL	1395.66	6.697	30	6.017	0.01
APO-USP47	169	180	YVSQSYSYSSIL	1395.66	6.7695	600	6.195	0
APO-USP47	169	180	YVSQSYSYSSIL	1395.66	6.7136	3600	6.082	0.191
APO-USP47	169	187	YVSQSYSYSSILNKSETGY	2175	6.0748	0	0	0
APO-USP47	169	187	YVSQSYSYSSILNKSETGY	2175	6.0757	30	10.219	0.101
APO-USP47	169	187	YVSQSYSYSSILNKSETGY	2175	6.0528	600	10.757	0
APO-USP47	169	187	YVSQSYSYSSILNKSETGY	2175	6.0789	3600	10.631	0.257
APO-USP47	174	180	YSYSSIL	831.401	6.6155	0	0	0
APO-USP47	174	180	YSYSSIL	831.401	6.5983	30	3.223	0.005
APO-USP47	174	180	YSYSSIL	831.401	6.6275	600	3.301	0
APO-USP47	174	180	YSYSSIL	831.401	6.6059	3600	3.264	0.039
APO-USP47	175	180	SYSSIL	668.338	6.009	0	0	0
APO-USP47	175	180	SYSSIL	668.338	5.9969	30	2.436	0.029
APO-USP47	175	180	SYSSIL	668.338	6.0484	600	2.551	0
APO-USP47	175	180	SYSSIL	668.338	6.0212	3600	2.478	0.065
APO-USP47	176	180	YSSIL	581.306	5.8854	0	0	0
APO-USP47	176	180	YSSIL	581.306	5.8855	30	1.743	0
APO-USP47	176	180	YSSIL	581.306	5.8997	600	1.864	0
APO-USP47	176	180	YSSIL	581.306	5.8881	3600	1.923	0.004
APO-USP47	181	196	NKSETGYVGLVNQAMT	1710.82	5.8751	0	0	0
APO-USP47	181	196	NKSETGYVGLVNQAMT	1710.82	5.8738	30	5.729	0.03
APO-USP47	181	196	NKSETGYVGLVNQAMT	1710.82	5.8642	600	6.326	0
APO-USP47	181	196	NKSETGYVGLVNQAMT	1710.82	5.8348	3600	6.436	0.117
APO-USP47	184	190	ETGYVGL	737.36	5.6924	0	0	0
APO-USP47	184	190	ETGYVGL	737.36	5.6929	30	0.98	0.008
APO-USP47	184	190	ETGYVGL	737.36	5.6822	600	1.401	0
APO-USP47	184	190	ETGYVGL	737.36	5.6917	3600	1.37	0.038
APO-USP47	184	197	ETGYVGLVNQAMTC	1484.66	6.7457	0	0	0
APO-USP47	184	197	ETGYVGLVNQAMTC	1484.66	6.7558	30	5.309	0.134
APO-USP47	184	197	ETGYVGLVNQAMTC	1484.66	6.7207	600	6.222	0
APO-USP47	184	197	ETGYVGLVNQAMTC	1484.66	6.7513	3600	5.858	0.006
APO-USP47	188	196	VGLVNQAMT	931.48	5.0958	0	0	0
APO-USP47	188	196	VGLVNQAMT	931.48	5.0938	30	3.801	0.036
APO-USP47	188	196	VGLVNQAMT	931.48	5.0875	600	3.922	0
APO-USP47	188	196	VGLVNQAMT	931.48	5.0937	3600	3.879	0.113
APO-USP47	190	196	LVNQAMT	775.39	3.7848	0	0	0
APO-USP47	190	196	LVNQAMT	775.39	3.7967	30	3.236	0.012
APO-USP47	190	196	LVNQAMT	775.39	3.7872	600	3.464	0
APO-USP47	190	196	LVNQAMT	775.39	3.7756	3600	3.333	0.005
APO-USP47	198	203	YLNSLL	721.401	6.6814	0	0	0
APO-USP47	198	203	YLNSLL	721.401	6.4529	30	1.212	0.009
APO-USP47	198	203	YLNSLL	721.401	6.4877	600	1.25	0
APO-USP47	198	203	YLNSLL	721.401	6.4772	3600	1.228	0.038
APO-USP47	199	203	LNSLL	558.338	6.5941	0	0	0
APO-USP47	199	203	LNSLL	558.338	6.5927	30	0.055	0.001
APO-USP47	199	203	LNSLL	558.338	6.5676	600	0.063	0
APO-USP47	199	203	LNSLL	558.338	6.6093	3600	0.087	0.003
APO-USP47	206	212	LFMTPEF	883.415	7.5905	0	0	0
APO-USP47	206	212	LFMTPEF	883.415	7.6257	30	0.106	0.002
APO-USP47	206	212	LFMTPEF	883.415	7.6283	600	0.122	0
APO-USP47	206	212	LFMTPEF	883.415	7.63	3600	0.145	0.006
APO-USP47	206	216	LFMTPEFRNAL	1337.68	7.0742	0	0	0
APO-USP47	206	216	LFMTPEFRNAL	1337.68	7.0832	30	0.248	0.026
APO-USP47	206	216	LFMTPEFRNAL	1337.68	6.9981	600	0.233	0
APO-USP47	206	216	LFMTPEFRNAL	1337.68	7.0786	3600	0.248	0.042
APO-USP47	207	211	FMTPE	623.263	4.6628	0	0	0
APO-USP47	207	211	FMTPE	623.263	4.7354	30	0.061	0.026
APO-USP47	207	211	FMTPE	623.263	4.7259	600	0.051	0
APO-USP47	207	211	FMTPE	623.263	4.6898	3600	0.082	0.022
APO-USP47	207	212	FMTPEF	770.331	6.9314	0	0	0
APO-USP47	207	212	FMTPEF	770.331	6.8401	30	0.063	0.02
APO-USP47	207	212	FMTPEF	770.331	6.9293	600	0.156	0
APO-USP47	207	212	FMTPEF	770.331	6.9244	3600	0.165	0
APO-USP47	207	216	FMTPEFRNAL	1224.6	6.4846	0	0	0
APO-USP47	207	216	FMTPEFRNAL	1224.6	6.5328	30	0.218	0.005
APO-USP47	207	216	FMTPEFRNAL	1224.6	6.5565	600	0.224	0
APO-USP47	207	216	FMTPEFRNAL	1224.6	6.5216	3600	0.249	0.015
APO-USP47	212	216	FRNAL	619.344	4.5145	0	0	0
APO-USP47	212	216	FRNAL	619.344	4.5429	30	0.071	0
APO-USP47	212	216	FRNAL	619.344	4.5861	600	0.103	0
APO-USP47	212	216	FRNAL	619.344	4.5301	3600	0.072	0.005
APO-USP47	217	220	YKWE	624.291	4.904	0	0	0
APO-USP47	217	220	YKWE	624.291	4.914	30	0.188	0.009
APO-USP47	217	220	YKWE	624.291	4.8989	600	0.635	0
APO-USP47	217	220	YKWE	624.291	4.9186	3600	0.672	0
APO-USP47	222	239	EESEEDPVTSIPYQLQRL	2132.03	7.0368	0	0	0
APO-USP47	222	239	EESEEDPVTSIPYQLQRL	2132.03	7.0665	30	2.302	0.043
APO-USP47	222	239	EESEEDPVTSIPYQLQRL	2132.03	7.0114	600	4.522	0
APO-USP47	222	239	EESEEDPVTSIPYQLQRL	2132.03	7.0009	3600	4.839	0.158
APO-USP47	224	236	SEEDPVTSIPYQL	1476.7	6.6673	0	0	0
APO-USP47	224	236	SEEDPVTSIPYQL	1476.7	6.6271	30	1.404	0.076
APO-USP47	224	236	SEEDPVTSIPYQL	1476.7	6.6563	600	3.116	0
APO-USP47	224	236	SEEDPVTSIPYQL	1476.7	6.6636	3600	3.322	0.056
APO-USP47	224	238	SEEDPVTSIPYQLQR	1760.86	5.7468	0	0	0
APO-USP47	224	238	SEEDPVTSIPYQLQR	1760.86	5.7395	30	0.962	0.066
APO-USP47	224	238	SEEDPVTSIPYQLQR	1760.86	5.7466	600	3.196	0
APO-USP47	224	238	SEEDPVTSIPYQLQR	1760.86	5.7416	3600	3.427	0.023
APO-USP47	224	239	SEEDPVTSIPYQLQRL	1873.94	6.9259	0	0	0
APO-USP47	224	239	SEEDPVTSIPYQLQRL	1873.94	6.94	30	1.493	0.058
APO-USP47	224	239	SEEDPVTSIPYQLQRL	1873.94	6.9315	600	3.512	0
APO-USP47	224	239	SEEDPVTSIPYQLQRL	1873.94	6.9088	3600	3.743	0.013
APO-USP47	225	236	EEDPVTSIPYQL	1389.67	6.711	0	0	0
APO-USP47	225	236	EEDPVTSIPYQL	1389.67	6.7181	30	0.143	0.067
APO-USP47	225	236	EEDPVTSIPYQL	1389.67	6.6807	600	2.454	0
APO-USP47	225	236	EEDPVTSIPYQL	1389.67	6.7136	3600	2.505	0.032
APO-USP47	225	238	EEDPVTSIPYQLQR	1673.83	5.759	0	0	0
APO-USP47	225	238	EEDPVTSIPYQLQR	1673.83	5.7617	30	1.074	0.041
APO-USP47	225	238	EEDPVTSIPYQLQR	1673.83	5.7621	600	3.073	0
APO-USP47	225	238	EEDPVTSIPYQLQR	1673.83	5.7583	3600	3.279	0.08
APO-USP47	225	239	EEDPVTSIPYQLQRL	1786.91	6.9048	0	0	0
APO-USP47	225	239	EEDPVTSIPYQLQRL	1786.91	6.859	30	1.481	0.101
APO-USP47	225	239	EEDPVTSIPYQLQRL	1786.91	6.8583	600	3.564	0
APO-USP47	225	239	EEDPVTSIPYQLQRL	1786.91	6.86	3600	3.693	0.08
APO-USP47	228	236	PVTSIPYQL	1016.55	6.4025	0	0	0
APO-USP47	228	236	PVTSIPYQL	1016.55	6.3986	30	0.402	0.143
APO-USP47	228	236	PVTSIPYQL	1016.55	6.4034	600	2.153	0
APO-USP47	228	236	PVTSIPYQL	1016.55	6.3907	3600	2.319	0.097
APO-USP47	243	252	LQTSKKRAIE	1172.69	2.2201	0	0	0
APO-USP47	243	252	LQTSKKRAIE	1172.69	2.2377	30	2.154	0.085
APO-USP47	243	252	LQTSKKRAIE	1172.69	2.214	600	3.357	0
APO-USP47	243	252	LQTSKKRAIE	1172.69	2.1967	3600	3.461	0.113
APO-USP47	243	254	LQTSKKRAIETT	1374.78	2.3799	0	0	0
APO-USP47	243	254	LQTSKKRAIETT	1374.78	2.4064	30	3.375	0.134
APO-USP47	243	254	LQTSKKRAIETT	1374.78	2.4004	600	4.639	0
APO-USP47	243	254	LQTSKKRAIETT	1374.78	2.4175	3600	4.559	0.172
APO-USP47	243	255	LQTSKKRAIETTD	1489.81	2.4756	0	0	0
APO-USP47	243	255	LQTSKKRAIETTD	1489.81	2.5329	30	3.681	0.113
APO-USP47	243	255	LQTSKKRAIETTD	1489.81	2.4758	600	5.072	0
APO-USP47	243	255	LQTSKKRAIETTD	1489.81	2.483	3600	5.041	0.134
APO-USP47	243	256	LQTSKKRAIETTDV	1588.88	3.3674	0	0	0
APO-USP47	243	256	LQTSKKRAIETTDV	1588.88	3.3895	30	3.634	0.146
APO-USP47	243	256	LQTSKKRAIETTDV	1588.88	3.3656	600	5.519	0
APO-USP47	243	256	LQTSKKRAIETTDV	1588.88	3.3917	3600	5.738	0.082
APO-USP47	243	266	LQTSKKRAIETTDVTRSFGWDSSE	2741.36	5.3894	0	0	0
APO-USP47	243	266	LQTSKKRAIETTDVTRSFGWDSSE	2741.36	5.3867	30	5.779	0.049
APO-USP47	243	266	LQTSKKRAIETTDVTRSFGWDSSE	2741.36	5.3982	600	8.473	0
APO-USP47	243	266	LQTSKKRAIETTDVTRSFGWDSSE	2741.36	5.4154	3600	9.273	0.182
APO-USP47	243	267	LQTSKKRAIETTDVTRSFGWDSSEA	2812.4	5.4283	0	0	0
APO-USP47	243	267	LQTSKKRAIETTDVTRSFGWDSSEA	2812.4	5.4333	30	6.468	0.108
APO-USP47	243	267	LQTSKKRAIETTDVTRSFGWDSSEA	2812.4	5.4337	600	9.274	0
APO-USP47	243	267	LQTSKKRAIETTDVTRSFGWDSSEA	2812.4	5.4398	3600	9.792	0.204
APO-USP47	249	266	RAIETTDVTRSFGWDSSE	2055.95	5.9398	0	0	0
APO-USP47	249	266	RAIETTDVTRSFGWDSSE	2055.95	5.9359	30	4.625	0.089
APO-USP47	249	266	RAIETTDVTRSFGWDSSE	2055.95	5.9152	600	6.867	0
APO-USP47	249	266	RAIETTDVTRSFGWDSSE	2055.95	5.9391	3600	7.428	0.316
APO-USP47	250	255	AIETTD	648.297	2.8166	0	0	0
APO-USP47	250	255	AIETTD	648.297	2.8014	30	1.858	0.006
APO-USP47	250	255	AIETTD	648.297	2.8131	600	2.404	0
APO-USP47	250	255	AIETTD	648.297	2.8203	3600	2.314	0.025
APO-USP47	253	267	TTDVTRSFGWDSSEA	1657.72	5.9239	0	0	0
APO-USP47	253	267	TTDVTRSFGWDSSEA	1657.72	5.917	30	4.136	0.029
APO-USP47	253	267	TTDVTRSFGWDSSEA	1657.72	5.9197	600	5.542	0
APO-USP47	253	267	TTDVTRSFGWDSSEA	1657.72	5.9136	3600	6.17	0.118
APO-USP47	255	262	DVTRSFGW	966.456	6.5874	0	0	0
APO-USP47	255	262	DVTRSFGW	966.456	6.5727	30	1.283	0.012
APO-USP47	255	262	DVTRSFGW	966.456	6.5942	600	2.329	0
APO-USP47	255	262	DVTRSFGW	966.456	6.5837	3600	2.946	0.203
APO-USP47	255	267	DVTRSFGWDSSEA	1455.63	5.9653	0	0	0
APO-USP47	255	267	DVTRSFGWDSSEA	1455.63	5.9936	30	3.79	0.046
APO-USP47	255	267	DVTRSFGWDSSEA	1455.63	5.9907	600	4.843	0
APO-USP47	255	267	DVTRSFGWDSSEA	1455.63	5.9513	3600	5.451	0.183
APO-USP47	256	262	VTRSFGW	851.429	6.2479	0	0	0
APO-USP47	256	262	VTRSFGW	851.429	6.2865	30	1.283	0.016
APO-USP47	256	262	VTRSFGW	851.429	6.2658	600	1.877	0
APO-USP47	256	262	VTRSFGW	851.429	6.2642	3600	2.264	0.052
APO-USP47	256	266	VTRSFGWDSSE	1269.56	5.56	0	0	0
APO-USP47	256	266	VTRSFGWDSSE	1269.56	5.5631	30	3.027	0.042
APO-USP47	256	266	VTRSFGWDSSE	1269.56	5.5979	600	3.722	0
APO-USP47	256	266	VTRSFGWDSSE	1269.56	5.5552	3600	4.041	0.138
APO-USP47	256	267	VTRSFGWDSSEA	1340.6	5.6532	0	0	0
APO-USP47	256	267	VTRSFGWDSSEA	1340.6	5.6585	30	3.616	0.033
APO-USP47	256	267	VTRSFGWDSSEA	1340.6	5.6179	600	4.24	0
APO-USP47	256	267	VTRSFGWDSSEA	1340.6	5.6573	3600	4.653	0.119
APO-USP47	257	276	TRSFGWDSSEAWQQHDVQEL	2405.07	6.4861	0	0	0
APO-USP47	257	276	TRSFGWDSSEAWQQHDVQEL	2405.07	6.4757	30	6.5	0
APO-USP47	257	276	TRSFGWDSSEAWQQHDVQEL	2405.07	6.4477	600	8.538	0
APO-USP47	257	276	TRSFGWDSSEAWQQHDVQEL	2405.07	6.5183	3600	8.618	0.215
APO-USP47	259	265	SFGWDSS	784.303	6.1673	0	0	0
APO-USP47	259	265	SFGWDSS	784.303	6.1933	30	2.007	0.057
APO-USP47	259	265	SFGWDSS	784.303	6.1837	600	2.428	0
APO-USP47	259	265	SFGWDSS	784.303	6.1721	3600	2.393	0.009
APO-USP47	259	266	SFGWDSSE	913.345	6.1466	0	0	0
APO-USP47	259	266	SFGWDSSE	913.345	6.1323	30	2.351	0.12
APO-USP47	259	266	SFGWDSSE	913.345	6.1371	600	2.838	0
APO-USP47	259	266	SFGWDSSE	913.345	6.141	3600	2.745	0.045
APO-USP47	259	271	SFGWDSSEAWQQH	1563.64	6.4336	0	0	0
APO-USP47	259	271	SFGWDSSEAWQQH	1563.64	6.4396	30	4.697	0.124
APO-USP47	259	271	SFGWDSSEAWQQH	1563.64	6.4433	600	5.4	0
APO-USP47	259	271	SFGWDSSEAWQQH	1563.64	6.4273	3600	5.372	0.016
APO-USP47	260	267	FGWDSSEA	897.35	6.3204	0	0	0
APO-USP47	260	267	FGWDSSEA	897.35	6.3153	30	0.936	0.053
APO-USP47	260	267	FGWDSSEA	897.35	6.3257	600	1.104	0
APO-USP47	260	267	FGWDSSEA	897.35	6.333	3600	1.44	0.049
APO-USP47	267	271	AWQQH	668.303	2.9579	0	0	0
APO-USP47	267	271	AWQQH	668.303	2.9667	30	1.591	0.051
APO-USP47	267	271	AWQQH	668.303	2.9906	600	1.723	0
APO-USP47	267	271	AWQQH	668.303	2.9823	3600	1.671	0.045
APO-USP47	267	275	AWQQHDVQE	1139.5	3.9771	0	0	0
APO-USP47	267	275	AWQQHDVQE	1139.5	3.9686	30	2.039	0.127
APO-USP47	267	275	AWQQHDVQE	1139.5	3.9737	600	3.251	0
APO-USP47	267	275	AWQQHDVQE	1139.5	3.9786	3600	3.56	0.168
APO-USP47	267	276	AWQQHDVQEL	1252.58	5.3433	0	0	0
APO-USP47	267	276	AWQQHDVQEL	1252.58	5.3257	30	1.956	0.022
APO-USP47	267	276	AWQQHDVQEL	1252.58	5.3494	600	3.17	0
APO-USP47	267	276	AWQQHDVQEL	1252.58	5.3444	3600	3.568	0.21
APO-USP47	268	275	WQQHDVQE	1068.46	3.6539	0	0	0
APO-USP47	268	275	WQQHDVQE	1068.46	3.6568	30	1.309	0.029
APO-USP47	268	275	WQQHDVQE	1068.46	3.6474	600	2.538	0
APO-USP47	268	275	WQQHDVQE	1068.46	3.648	3600	2.837	0.148
APO-USP47	268	276	WQQHDVQEL	1181.55	5.1484	0	0	0
APO-USP47	268	276	WQQHDVQEL	1181.55	5.1326	30	1.151	0.037
APO-USP47	268	276	WQQHDVQEL	1181.55	5.1696	600	2.371	0
APO-USP47	268	276	WQQHDVQEL	1181.55	5.1325	3600	2.787	0.136
APO-USP47	272	276	DVQEL	602.291	4.6362	0	0	0
APO-USP47	272	276	DVQEL	602.291	4.6499	30	0.185	0.015
APO-USP47	272	276	DVQEL	602.291	4.646	600	0.907	0
APO-USP47	272	276	DVQEL	602.291	4.6321	3600	1.395	0.084
APO-USP47	277	281	CRVMF	654.298	5.8196	0	0	0
APO-USP47	277	281	CRVMF	654.298	5.8061	30	0.026	0.006
APO-USP47	277	281	CRVMF	654.298	5.8242	600	0.021	0
APO-USP47	277	281	CRVMF	654.298	5.8182	3600	0.025	0.001
APO-USP47	279	281	VMF	395.188	6.0756	0	0	0
APO-USP47	279	281	VMF	395.188	6.069	30	0.027	0.004
APO-USP47	279	281	VMF	395.188	6.0861	600	0.073	0
APO-USP47	279	281	VMF	395.188	6.0856	3600	0.053	0.006
APO-USP47	279	282	VMFD	510.215	5.3899	0	0	0
APO-USP47	279	282	VMFD	510.215	5.3989	30	0.072	0.023
APO-USP47	279	282	VMFD	510.215	5.4004	600	0.081	0
APO-USP47	279	282	VMFD	510.215	5.4032	3600	0.066	0.011
APO-USP47	282	296	DALEQKWKQTEQADL	1801.88	5.8422	0	0	0
APO-USP47	282	296	DALEQKWKQTEQADL	1801.88	5.8482	30	4.747	0.104
APO-USP47	282	296	DALEQKWKQTEQADL	1801.88	5.8309	600	7.507	0
APO-USP47	282	296	DALEQKWKQTEQADL	1801.88	5.8348	3600	8.167	0.28
APO-USP47	285	296	EQKWKQTEQADL	1502.74	4.462	0	0	0
APO-USP47	285	296	EQKWKQTEQADL	1502.74	4.4968	30	3.855	0.072
APO-USP47	285	296	EQKWKQTEQADL	1502.74	4.5151	600	5.649	0
APO-USP47	285	296	EQKWKQTEQADL	1502.74	4.5034	3600	5.904	0.166
APO-USP47	291	296	TEQADL	675.308	3.9705	0	0	0
APO-USP47	291	296	TEQADL	675.308	3.962	30	1.833	0.063
APO-USP47	291	296	TEQADL	675.308	3.9914	600	2.591	0
APO-USP47	291	296	TEQADL	675.308	3.9686	3600	2.571	0.063
APO-USP47	297	307	INELYQGKLKD	1319.71	4.4538	0	0	0
APO-USP47	297	307	INELYQGKLKD	1319.71	4.5201	30	0.51	0.005
APO-USP47	297	307	INELYQGKLKD	1319.71	4.5106	600	0.561	0
APO-USP47	297	307	INELYQGKLKD	1319.71	4.4713	3600	0.721	0.074
APO-USP47	300	307	LYQGKLKD	963.539	3.3851	0	0	0
APO-USP47	300	307	LYQGKLKD	963.539	3.3961	30	0.328	0.021
APO-USP47	300	307	LYQGKLKD	963.539	3.3789	600	0.336	0
APO-USP47	300	307	LYQGKLKD	963.539	3.3983	3600	0.346	0.03
APO-USP47	301	307	YQGKLKD	850.455	2.6051	0	0	0
APO-USP47	301	307	YQGKLKD	850.455	2.6727	30	0.308	0.026
APO-USP47	301	307	YQGKLKD	850.455	2.64	600	0.389	0
APO-USP47	301	307	YQGKLKD	850.455	2.5975	3600	0.244	0
APO-USP47	301	308	YQGKLKDY	1013.52	3.6543	0	0	0
APO-USP47	301	308	YQGKLKDY	1013.52	3.6857	30	0.42	0.016
APO-USP47	301	308	YQGKLKDY	1013.52	3.694	600	0.224	0
APO-USP47	301	308	YQGKLKDY	1013.52	3.679	3600	0.315	0.081
APO-USP47	312	322	LECGYEGWRID	1339.59	6.6096	0	0	0
APO-USP47	312	322	LECGYEGWRID	1339.59	6.6748	30	2.338	0.057
APO-USP47	312	322	LECGYEGWRID	1339.59	6.6519	600	3.92	0
APO-USP47	312	322	LECGYEGWRID	1339.59	6.6425	3600	4.338	0.11
APO-USP47	312	323	LECGYEGWRIDT	1440.63	6.5726	0	0	0
APO-USP47	312	323	LECGYEGWRIDT	1440.63	6.5561	30	3.049	0.024
APO-USP47	312	323	LECGYEGWRIDT	1440.63	6.5343	600	4.957	0
APO-USP47	312	323	LECGYEGWRIDT	1440.63	6.5726	3600	5.289	0.191
APO-USP47	313	323	ECGYEGWRIDT	1327.55	6.2312	0	0	0
APO-USP47	313	323	ECGYEGWRIDT	1327.55	6.2199	30	1.991	0.011
APO-USP47	313	323	ECGYEGWRIDT	1327.55	6.2303	600	3.194	0
APO-USP47	313	323	ECGYEGWRIDT	1327.55	6.2132	3600	3.42	0.099
APO-USP47	316	322	YEGWRID	937.429	6.3197	0	0	0
APO-USP47	316	322	YEGWRID	937.429	6.3231	30	1.403	0.064
APO-USP47	316	322	YEGWRID	937.429	6.2946	600	2.142	0
APO-USP47	316	322	YEGWRID	937.429	6.3274	3600	2.064	0.037
APO-USP47	318	322	GWRID	645.323	5.2209	0	0	0
APO-USP47	318	322	GWRID	645.323	5.3379	30	0.962	0.061
APO-USP47	318	322	GWRID	645.323	5.3449	600	1.615	0
APO-USP47	318	322	GWRID	645.323	5.3333	3600	1.612	0.063
APO-USP47	318	323	GWRIDT	746.371	5.2926	0	0	0
APO-USP47	318	323	GWRIDT	746.371	5.3001	30	1.401	0.074
APO-USP47	318	323	GWRIDT	746.371	5.3116	600	2.242	0
APO-USP47	318	323	GWRIDT	746.371	5.2978	3600	2.227	0.066
APO-USP47	321	325	IDTYL	623.317	5.8204	0	0	0
APO-USP47	321	325	IDTYL	623.317	5.8172	30	1.044	0.051
APO-USP47	321	325	IDTYL	623.317	5.8132	600	1.373	0
APO-USP47	321	325	IDTYL	623.317	5.8193	3600	1.283	0.056
APO-USP47	324	329	YLDIPL	732.406	7.3227	0	0	0
APO-USP47	324	329	YLDIPL	732.406	7.3383	30	0.121	0.002
APO-USP47	324	329	YLDIPL	732.406	7.3398	600	0.246	0
APO-USP47	324	329	YLDIPL	732.406	7.3415	3600	0.272	0.01
APO-USP47	324	332	YLDIPLVIR	1100.66	7.0486	0	0	0
APO-USP47	324	332	YLDIPLVIR	1100.66	7.1231	30	0.265	0.002
APO-USP47	324	332	YLDIPLVIR	1100.66	7.0713	600	0.65	0
APO-USP47	324	332	YLDIPLVIR	1100.66	7.0941	3600	1.374	0.063
APO-USP47	324	340	YLDIPLVIRPYGSSQAF	1938.03	7.6474	0	0	0
APO-USP47	324	340	YLDIPLVIRPYGSSQAF	1938.03	7.4482	30	3.485	0.054
APO-USP47	324	340	YLDIPLVIRPYGSSQAF	1938.03	7.6416	600	4.594	0
APO-USP47	324	340	YLDIPLVIRPYGSSQAF	1938.03	7.6378	3600	5.3	0.139
APO-USP47	325	339	LDIPLVIRPYGSSQA	1627.89	6.6843	0	0	0
APO-USP47	325	339	LDIPLVIRPYGSSQA	1627.89	6.6926	30	3.333	0.036
APO-USP47	325	339	LDIPLVIRPYGSSQA	1627.89	6.6785	600	3.981	0
APO-USP47	325	339	LDIPLVIRPYGSSQA	1627.89	6.708	3600	4.573	0.158
APO-USP47	326	339	DIPLVIRPYGSSQA	1514.81	6.0534	0	0	0
APO-USP47	326	339	DIPLVIRPYGSSQA	1514.81	6.0624	30	3.468	0.017
APO-USP47	326	339	DIPLVIRPYGSSQA	1514.81	6.0705	600	3.942	0
APO-USP47	326	339	DIPLVIRPYGSSQA	1514.81	6.0501	3600	4.623	0.158
APO-USP47	326	340	DIPLVIRPYGSSQAF	1661.88	6.8367	0	0	0
APO-USP47	326	340	DIPLVIRPYGSSQAF	1661.88	6.8424	30	3.553	0.035
APO-USP47	326	340	DIPLVIRPYGSSQAF	1661.88	6.8383	600	3.675	0
APO-USP47	326	340	DIPLVIRPYGSSQAF	1661.88	6.8424	3600	4.07	0
APO-USP47	330	339	VIRPYGSSQA	1076.56	3.7996	0	0	0
APO-USP47	330	339	VIRPYGSSQA	1076.56	3.7944	30	3.491	0.001
APO-USP47	330	339	VIRPYGSSQA	1076.56	3.8028	600	3.799	0
APO-USP47	330	339	VIRPYGSSQA	1076.56	3.7978	3600	4.062	0.077
APO-USP47	330	340	VIRPYGSSQAF	1223.63	5.2693	0	0	0
APO-USP47	330	340	VIRPYGSSQAF	1223.63	5.2735	30	3.493	0.037
APO-USP47	330	340	VIRPYGSSQAF	1223.63	5.2517	600	4.303	0
APO-USP47	330	340	VIRPYGSSQAF	1223.63	5.2767	3600	4.579	0.075
APO-USP47	330	344	VIRPYGSSQAFASVE	1609.81	5.4809	0	0	0
APO-USP47	330	344	VIRPYGSSQAFASVE	1609.81	5.4732	30	3.913	0.061
APO-USP47	330	344	VIRPYGSSQAFASVE	1609.81	5.4825	600	5.527	0
APO-USP47	330	344	VIRPYGSSQAFASVE	1609.81	5.4931	3600	6.117	0.159
APO-USP47	333	339	PYGSSQA	708.308	2.9771	0	0	0
APO-USP47	333	339	PYGSSQA	708.308	3.02	30	2.99	0.028
APO-USP47	333	339	PYGSSQA	708.308	3.0261	600	3.163	0
APO-USP47	333	339	PYGSSQA	708.308	2.9911	3600	3.098	0.011
APO-USP47	333	340	PYGSSQAF	855.376	5.1712	0	0	0
APO-USP47	333	340	PYGSSQAF	855.376	5.1726	30	3.094	0.039
APO-USP47	333	340	PYGSSQAF	855.376	5.2096	600	3.782	0
APO-USP47	333	340	PYGSSQAF	855.376	5.2002	3600	3.633	0.007
APO-USP47	340	344	FASVE	551.259	4.0578	0	0	0
APO-USP47	340	344	FASVE	551.259	4.0474	30	1.012	0.046
APO-USP47	340	344	FASVE	551.259	4.0513	600	1.236	0
APO-USP47	340	344	FASVE	551.259	4.0641	3600	1.487	0.054
APO-USP47	341	349	ASVEEALHA	925.451	4.8645	0	0	0
APO-USP47	341	349	ASVEEALHA	925.451	4.8974	30	0.868	0.007
APO-USP47	341	349	ASVEEALHA	925.451	4.9056	600	1.446	0
APO-USP47	341	349	ASVEEALHA	925.451	4.8917	3600	1.717	0.073
APO-USP47	345	349	EALHA	539.27	3.1524	0	0	0
APO-USP47	345	349	EALHA	539.27	3.1376	30	0.242	0.018
APO-USP47	345	349	EALHA	539.27	3.1459	600	0.227	0
APO-USP47	345	349	EALHA	539.27	3.1431	3600	0.22	0.008
APO-USP47	350	354	FIQPE	632.317	4.2301	0	0	0
APO-USP47	350	354	FIQPE	632.317	4.2161	30	0.129	0.01
APO-USP47	350	354	FIQPE	632.317	4.2133	600	0.195	0
APO-USP47	350	354	FIQPE	632.317	4.1908	3600	0.37	0
APO-USP47	350	356	FIQPEIL	858.485	6.7509	0	0	0
APO-USP47	350	356	FIQPEIL	858.485	6.7325	30	0.378	0.012
APO-USP47	350	356	FIQPEIL	858.485	6.7384	600	1.093	0
APO-USP47	350	356	FIQPEIL	858.485	6.7324	3600	1.591	0.087
APO-USP47	350	362	FIQPEILDGPNQY	1532.75	6.6059	0	0	0
APO-USP47	350	362	FIQPEILDGPNQY	1532.75	6.6082	30	2.091	0.053
APO-USP47	350	362	FIQPEILDGPNQY	1532.75	6.6075	600	3.932	0
APO-USP47	350	362	FIQPEILDGPNQY	1532.75	6.6137	3600	4.445	0.088
APO-USP47	351	356	IQPEIL	711.417	6.5564	0	0	0
APO-USP47	351	356	IQPEIL	711.417	6.0313	30	0.163	0.035
APO-USP47	351	356	IQPEIL	711.417	6.6275	600	0.614	0
APO-USP47	351	356	IQPEIL	711.417	6.627	3600	0.686	0.016
APO-USP47	351	362	IQPEILDGPNQY	1385.68	5.9816	0	0	0
APO-USP47	351	362	IQPEILDGPNQY	1385.68	5.977	30	1.98	0.005
APO-USP47	351	362	IQPEILDGPNQY	1385.68	5.9818	600	3.525	0
APO-USP47	351	362	IQPEILDGPNQY	1385.68	5.9413	3600	4.21	0.109
APO-USP47	351	363	IQPEILDGPNQYF	1532.75	6.6133	0	0	0
APO-USP47	351	363	IQPEILDGPNQYF	1532.75	6.6127	30	2.09	0.056
APO-USP47	351	363	IQPEILDGPNQYF	1532.75	6.6097	600	3.926	0
APO-USP47	351	363	IQPEILDGPNQYF	1532.75	6.6481	3600	4.402	0.035
APO-USP47	355	361	ILDGPNQ	755.381	3.7375	0	0	0
APO-USP47	355	361	ILDGPNQ	755.381	3.7545	30	1.642	0.038
APO-USP47	355	361	ILDGPNQ	755.381	3.7473	600	2.285	0
APO-USP47	355	361	ILDGPNQ	755.381	3.7456	3600	2.17	0.029
APO-USP47	355	362	ILDGPNQY	918.445	4.9964	0	0	0
APO-USP47	355	362	ILDGPNQY	918.445	4.9762	30	1.683	0.048
APO-USP47	355	362	ILDGPNQY	918.445	5.0143	600	2.635	0
APO-USP47	355	362	ILDGPNQY	918.445	5.0759	3600	2.729	0.03
APO-USP47	357	363	DGPNQYF	839.345	5.9291	0	0	0
APO-USP47	357	363	DGPNQYF	839.345	5.957	30	1.729	0.052
APO-USP47	357	363	DGPNQYF	839.345	5.964	600	2.674	0
APO-USP47	357	363	DGPNQYF	839.345	5.9635	3600	2.753	0.06
APO-USP47	357	364	DGPNQYFC	942.354	6.0438	0	0	0
APO-USP47	357	364	DGPNQYFC	942.354	6.0424	30	1.909	0.09
APO-USP47	357	364	DGPNQYFC	942.354	6.0373	600	2.835	0
APO-USP47	357	364	DGPNQYFC	942.354	6.0401	3600	2.967	0.26
APO-USP47	357	365	DGPNQYFCE	1071.4	5.8858	0	0	0
APO-USP47	357	365	DGPNQYFCE	1071.4	5.8871	30	2.552	0.036
APO-USP47	357	365	DGPNQYFCE	1071.4	5.9063	600	3.625	0
APO-USP47	357	365	DGPNQYFCE	1071.4	5.8812	3600	3.65	0
APO-USP47	363	365	FCE	397.131	3.7197	0	0	0
APO-USP47	363	365	FCE	397.131	3.7256	30	0.46	0.015
APO-USP47	363	365	FCE	397.131	3.7295	600	0.559	0
APO-USP47	363	365	FCE	397.131	3.7279	3600	0.529	0.008
APO-USP47	366	385	RCKKKCDARKGLRFLHFPYL	2478.36	6.1884	0	0	0
APO-USP47	366	385	RCKKKCDARKGLRFLHFPYL	2478.36	6.0679	30	1.137	0.202
APO-USP47	366	385	RCKKKCDARKGLRFLHFPYL	2478.36	6.2614	600	1.747	0
APO-USP47	366	385	RCKKKCDARKGLRFLHFPYL	2478.36	6.0767	3600	2.364	0.096
APO-USP47	372	382	DARKGLRFLHF	1358.76	5.5001	0	0	0
APO-USP47	372	382	DARKGLRFLHF	1358.76	5.4899	30	3.192	0.127
APO-USP47	372	382	DARKGLRFLHF	1358.76	5.5114	600	4.193	0
APO-USP47	372	382	DARKGLRFLHF	1358.76	5.4875	3600	4.468	0.011
APO-USP47	373	385	ARKGLRFLHFPYL	1616.93	6.6585	0	0	0
APO-USP47	373	385	ARKGLRFLHFPYL	1616.93	6.6604	30	0.573	0.014
APO-USP47	373	385	ARKGLRFLHFPYL	1616.93	6.7052	600	1.032	0
APO-USP47	373	385	ARKGLRFLHFPYL	1616.93	6.6625	3600	1.626	0.052
APO-USP47	374	385	RKGLRFLHFPYL	1545.89	6.6366	0	0	0
APO-USP47	374	385	RKGLRFLHFPYL	1545.89	6.6648	30	0.496	0.07
APO-USP47	374	385	RKGLRFLHFPYL	1545.89	6.683	600	1.066	0
APO-USP47	374	385	RKGLRFLHFPYL	1545.89	6.6681	3600	1.525	0.067
APO-USP47	374	387	RKGLRFLHFPYLLT	1760.02	6.8042	0	0	0
APO-USP47	374	387	RKGLRFLHFPYLLT	1760.02	6.7974	30	0.633	0
APO-USP47	374	387	RKGLRFLHFPYLLT	1760.02	6.8006	600	1.112	0
APO-USP47	374	387	RKGLRFLHFPYLLT	1760.02	6.8287	3600	1.544	0
APO-USP47	376	387	GLRFLHFPYLLT	1475.83	7.6985	0	0	0
APO-USP47	376	387	GLRFLHFPYLLT	1475.83	7.7045	30	0.473	0.018
APO-USP47	376	387	GLRFLHFPYLLT	1475.83	7.717	600	1.086	0
APO-USP47	376	387	GLRFLHFPYLLT	1475.83	7.7088	3600	1.254	0.059
APO-USP47	379	384	FLHFPY	822.406	6.9895	0	0	0
APO-USP47	379	384	FLHFPY	822.406	7.0199	30	0.46	0.011
APO-USP47	379	384	FLHFPY	822.406	7.0047	600	0.623	0
APO-USP47	379	384	FLHFPY	822.406	7.0464	3600	0.699	0.009
APO-USP47	379	385	FLHFPYL	935.49	7.93	0	0	0
APO-USP47	379	385	FLHFPYL	935.49	7.9918	30	0.455	0.001
APO-USP47	379	385	FLHFPYL	935.49	7.9789	600	0.637	0
APO-USP47	379	385	FLHFPYL	935.49	8.0218	3600	0.745	0.008
APO-USP47	380	385	LHFPYL	788.422	7.2631	0	0	0
APO-USP47	380	385	LHFPYL	788.422	7.2729	30	0.189	0.003
APO-USP47	380	385	LHFPYL	788.422	7.2777	600	0.256	0
APO-USP47	380	385	LHFPYL	788.422	7.2639	3600	0.377	0.027
APO-USP47	381	387	HFPYLLT	889.47	6.6984	0	0	0
APO-USP47	381	387	HFPYLLT	889.47	6.6859	30	0.129	0.051
APO-USP47	381	387	HFPYLLT	889.47	6.6941	600	0.147	0
APO-USP47	381	387	HFPYLLT	889.47	6.6836	3600	0.256	0.026
APO-USP47	383	387	PYLLT	605.342	5.9106	0	0	0
APO-USP47	383	387	PYLLT	605.342	5.9248	30	0.043	0.017
APO-USP47	383	387	PYLLT	605.342	5.913	600	0.053	0
APO-USP47	383	387	PYLLT	605.342	5.9258	3600	0.052	0.002
APO-USP47	386	390	LTLQL	586.369	6.6577	0	0	0
APO-USP47	386	390	LTLQL	586.369	6.6604	30	0.036	0.004
APO-USP47	386	390	LTLQL	586.369	6.6785	600	0.042	0
APO-USP47	386	390	LTLQL	586.369	6.6512	3600	0.049	0
APO-USP47	386	392	LTLQLKR	870.565	4.5252	0	0	0
APO-USP47	386	392	LTLQLKR	870.565	4.5484	30	0.231	0
APO-USP47	386	392	LTLQLKR	870.565	4.5683	600	0.779	0
APO-USP47	386	392	LTLQLKR	870.565	4.5689	3600	0.906	0.04
APO-USP47	386	393	LTLQLKRF	1017.63	5.7675	0	0	0
APO-USP47	386	393	LTLQLKRF	1017.63	5.7723	30	0.48	0
APO-USP47	386	393	LTLQLKRF	1017.63	5.7355	600	1.302	0
APO-USP47	386	393	LTLQLKRF	1017.63	5.7505	3600	1.363	0.096
APO-USP47	388	393	LQLKRF	803.502	4.7782	0	0	0
APO-USP47	388	393	LQLKRF	803.502	4.8652	30	0.526	0.009
APO-USP47	388	393	LQLKRF	803.502	4.7969	600	1.472	0
APO-USP47	388	393	LQLKRF	803.502	4.7886	3600	1.595	0.059
APO-USP47	393	396	FDFD	542.201	5.9528	0	0	0
APO-USP47	393	396	FDFD	542.201	5.9736	30	0.694	0.002
APO-USP47	393	396	FDFD	542.201	5.9174	600	0.911	0
APO-USP47	393	396	FDFD	542.201	5.9979	3600	0.86	0.019
APO-USP47	394	408	DFDYTTMHRIKLNDR	1923.93	5.042	0	0	0
APO-USP47	394	408	DFDYTTMHRIKLNDR	1923.93	5.0971	30	4.276	0.151
APO-USP47	394	408	DFDYTTMHRIKLNDR	1923.93	5.0676	600	5.639	0
APO-USP47	394	408	DFDYTTMHRIKLNDR	1923.93	5.0704	3600	5.708	0.204
APO-USP47	397	400	YTTM	514.21	3.8787	0	0	0
APO-USP47	397	400	YTTM	514.21	3.8865	30	1.357	0.014
APO-USP47	397	400	YTTM	514.21	3.8982	600	1.44	0
APO-USP47	397	400	YTTM	514.21	3.8888	3600	1.41	0.034
APO-USP47	397	407	YTTMHRIKLND	1390.7	4.0827	0	0	0
APO-USP47	397	407	YTTMHRIKLND	1390.7	4.104	30	2.26	0.075
APO-USP47	397	407	YTTMHRIKLND	1390.7	4.1068	600	3.474	0
APO-USP47	397	407	YTTMHRIKLND	1390.7	4.0863	3600	3.659	0.056
APO-USP47	397	408	YTTMHRIKLNDR	1546.8	3.7239	0	0	0
APO-USP47	397	408	YTTMHRIKLNDR	1546.8	3.7378	30	2.744	0.021
APO-USP47	397	408	YTTMHRIKLNDR	1546.8	3.7584	600	3.912	0
APO-USP47	397	408	YTTMHRIKLNDR	1546.8	3.7423	3600	3.928	0.03
APO-USP47	397	414	YTTMHRIKLNDRMTFPEE	2281.1	5.2678	0	0	0
APO-USP47	397	414	YTTMHRIKLNDRMTFPEE	2281.1	5.3135	30	3.732	0.074
APO-USP47	397	414	YTTMHRIKLNDRMTFPEE	2281.1	5.2939	600	5.93	0
APO-USP47	397	414	YTTMHRIKLNDRMTFPEE	2281.1	5.2581	3600	6.633	0
APO-USP47	401	408	HRIKLNDR	1050.6	2.5	0	0	0
APO-USP47	401	408	HRIKLNDR	1050.6	2.5251	30	2.145	0.042
APO-USP47	401	408	HRIKLNDR	1050.6	2.5424	600	3.182	0
APO-USP47	401	408	HRIKLNDR	1050.6	2.5309	3600	3.037	0
APO-USP47	401	414	HRIKLNDRMTFPEE	1784.9	4.8936	0	0	0
APO-USP47	401	414	HRIKLNDRMTFPEE	1784.9	4.9196	30	3.09	0.001
APO-USP47	401	414	HRIKLNDRMTFPEE	1784.9	4.93	600	5.107	0
APO-USP47	401	414	HRIKLNDRMTFPEE	1784.9	4.8942	3600	5.671	0
APO-USP47	406	414	NDRMTFPEE	1137.48	5.1739	0	0	0
APO-USP47	406	414	NDRMTFPEE	1137.48	5.1781	30	2.034	0.01
APO-USP47	406	414	NDRMTFPEE	1137.48	5.1674	600	2.999	0
APO-USP47	406	414	NDRMTFPEE	1137.48	5.1658	3600	3.763	0.082
APO-USP47	409	414	MTFPEE	752.305	5.5397	0	0	0
APO-USP47	409	414	MTFPEE	752.305	5.5598	30	1.241	0.025
APO-USP47	409	414	MTFPEE	752.305	5.5491	600	1.676	0
APO-USP47	409	414	MTFPEE	752.305	5.563	3600	1.943	0.057
APO-USP47	409	417	MTFPEELDM	1111.46	7.2643	0	0	0
APO-USP47	409	417	MTFPEELDM	1111.46	7.2928	30	1.518	0.001
APO-USP47	409	417	MTFPEELDM	1111.46	7.2866	600	1.883	0
APO-USP47	409	417	MTFPEELDM	1111.46	7.2849	3600	2.138	0.083
APO-USP47	415	419	LDMST	565.242	4.0888	0	0	0
APO-USP47	415	419	LDMST	565.242	4.1062	30	0.784	0.011
APO-USP47	415	419	LDMST	565.242	4.1223	600	0.825	0
APO-USP47	415	419	LDMST	565.242	4.1195	3600	0.945	0.032
APO-USP47	415	420	LDMSTF	712.31	6.3433	0	0	0
APO-USP47	415	420	LDMSTF	712.31	6.3564	30	0.769	0.014
APO-USP47	415	420	LDMSTF	712.31	6.3679	600	0.901	0
APO-USP47	415	420	LDMSTF	712.31	6.3263	3600	1.206	0.08
APO-USP47	421	434	IDVEDEKSPQTESC	1578.67	4.0319	0	0	0
APO-USP47	421	434	IDVEDEKSPQTESC	1578.67	4.033	30	6.142	0.022
APO-USP47	421	434	IDVEDEKSPQTESC	1578.67	4.0491	600	6.483	0
APO-USP47	421	434	IDVEDEKSPQTESC	1578.67	4.0474	3600	6.252	0.096
APO-USP47	421	453	IDVEDEKSPQTESCTDSGAENEGSCHSDQMSND	3543.35	4.1154	0	0	0
APO-USP47	421	453	IDVEDEKSPQTESCTDSGAENEGSCHSDQMSND	3543.35	4.1295	30	13.139	0.114
APO-USP47	421	453	IDVEDEKSPQTESCTDSGAENEGSCHSDQMSND	3543.35	4.109	600	14.08	0
APO-USP47	421	453	IDVEDEKSPQTESCTDSGAENEGSCHSDQMSND	3543.35	4.0807	3600	13.188	0.063
APO-USP47	423	434	VEDEKSPQTESC	1350.56	2.983	0	0	0
APO-USP47	423	434	VEDEKSPQTESC	1350.56	2.9767	30	4.587	0.003
APO-USP47	423	434	VEDEKSPQTESC	1350.56	2.9839	600	4.84	0
APO-USP47	423	434	VEDEKSPQTESC	1350.56	2.959	3600	4.721	0.028
APO-USP47	423	453	VEDEKSPQTESCTDSGAENEGSCHSDQMSND	3315.24	3.645	0	0	0
APO-USP47	423	453	VEDEKSPQTESCTDSGAENEGSCHSDQMSND	3315.24	3.6258	30	11.76	0.052
APO-USP47	423	453	VEDEKSPQTESCTDSGAENEGSCHSDQMSND	3315.24	3.6119	600	12.754	0
APO-USP47	423	453	VEDEKSPQTESCTDSGAENEGSCHSDQMSND	3315.24	3.638	3600	12.216	0.096
APO-USP47	435	453	TDSGAENEGSCHSDQMSND	1982.69	3.1258	0	0	0
APO-USP47	435	453	TDSGAENEGSCHSDQMSND	1982.69	3.1265	30	6.773	0.066
APO-USP47	435	453	TDSGAENEGSCHSDQMSND	1982.69	3.1304	600	7.647	0
APO-USP47	435	453	TDSGAENEGSCHSDQMSND	1982.69	3.1154	3600	7.221	0.131
APO-USP47	446	453	HSDQMSND	932.329	2.1842	0	0	0
APO-USP47	446	453	HSDQMSND	932.329	2.1767	30	2.543	0.172
APO-USP47	446	453	HSDQMSND	932.329	2.1918	600	2.777	0
APO-USP47	446	453	HSDQMSND	932.329	2.1834	3600	2.52	0.059
APO-USP47	457	463	DDGVDEG	705.245	2.7619	0	0	0
APO-USP47	457	463	DDGVDEG	705.245	2.7636	30	2.39	0.078
APO-USP47	457	463	DDGVDEG	705.245	2.751	600	2.573	0
APO-USP47	457	463	DDGVDEG	705.245	2.747	3600	2.484	0.076
APO-USP47	457	465	DDGVDEGIC	921.339	4.8973	0	0	0
APO-USP47	457	465	DDGVDEGIC	921.339	4.8663	30	3.566	0.024
APO-USP47	457	465	DDGVDEGIC	921.339	4.9744	600	3.688	0
APO-USP47	457	465	DDGVDEGIC	921.339	4.8773	3600	3.592	0.054
APO-USP47	457	466	DDGVDEGICL	1034.42	6.509	0	0	0
APO-USP47	457	466	DDGVDEGICL	1034.42	6.5173	30	4.126	0.036
APO-USP47	457	466	DDGVDEGICL	1034.42	6.5321	600	4.304	0
APO-USP47	457	466	DDGVDEGICL	1034.42	6.5638	3600	4.176	0.052
APO-USP47	466	474	LETNSGTEK	977.466	2.1897	0	0	0
APO-USP47	466	474	LETNSGTEK	977.466	2.1822	30	3.222	0.008
APO-USP47	466	474	LETNSGTEK	977.466	2.1807	600	3.424	0
APO-USP47	466	474	LETNSGTEK	977.466	2.169	3600	3.328	0.017
APO-USP47	466	485	LETNSGTEKISKSGLEKNSL	2134.11	4.3393	0	0	0
APO-USP47	466	485	LETNSGTEKISKSGLEKNSL	2134.11	4.3015	30	8.784	0.032
APO-USP47	466	485	LETNSGTEKISKSGLEKNSL	2134.11	4.3464	600	9.193	0
APO-USP47	466	485	LETNSGTEKISKSGLEKNSL	2134.11	4.4413	3600	8.853	0.077
APO-USP47	466	486	LETNSGTEKISKSGLEKNSLI	2247.2	4.9256	0	0	0
APO-USP47	466	486	LETNSGTEKISKSGLEKNSLI	2247.2	4.934	30	8.571	0.13
APO-USP47	466	486	LETNSGTEKISKSGLEKNSLI	2247.2	4.9344	600	9.244	0
APO-USP47	466	486	LETNSGTEKISKSGLEKNSLI	2247.2	4.965	3600	9.071	0.023
APO-USP47	467	485	ETNSGTEKISKSGLEKNSL	2021.03	4.1194	0	0	0
APO-USP47	467	485	ETNSGTEKISKSGLEKNSL	2021.03	4.1195	30	8.175	0.033
APO-USP47	467	485	ETNSGTEKISKSGLEKNSL	2021.03	4.1245	600	8.653	0
APO-USP47	467	485	ETNSGTEKISKSGLEKNSL	2021.03	4.1107	3600	8.434	0.124
APO-USP47	467	486	ETNSGTEKISKSGLEKNSLI	2134.11	4.4731	0	0	0
APO-USP47	467	486	ETNSGTEKISKSGLEKNSLI	2134.11	4.3015	30	8.782	0.032
APO-USP47	467	486	ETNSGTEKISKSGLEKNSLI	2134.11	4.3464	600	9.191	0
APO-USP47	467	486	ETNSGTEKISKSGLEKNSLI	2134.11	4.3969	3600	8.891	0.02
APO-USP47	470	485	SGTEKISKSGLEKNSL	1676.89	3.968	0	0	0
APO-USP47	470	485	SGTEKISKSGLEKNSL	1676.89	3.932	30	7.127	0.033
APO-USP47	470	485	SGTEKISKSGLEKNSL	1676.89	3.9426	600	7.538	0
APO-USP47	470	485	SGTEKISKSGLEKNSL	1676.89	3.9243	3600	7.353	0.071
APO-USP47	475	485	ISKSGLEKNSL	1174.66	4.0271	0	0	0
APO-USP47	475	485	ISKSGLEKNSL	1174.66	4.0674	30	4.208	0.097
APO-USP47	475	485	ISKSGLEKNSL	1174.66	4.0846	600	4.571	0
APO-USP47	475	485	ISKSGLEKNSL	1174.66	4.0241	3600	4.505	0.106
APO-USP47	484	489	SLIYEL	736.401	7.1185	0	0	0
APO-USP47	484	489	SLIYEL	736.401	7.1309	30	0.052	0.004
APO-USP47	484	489	SLIYEL	736.401	7.1046	600	0.155	0
APO-USP47	484	489	SLIYEL	736.401	7.0985	3600	0.485	0.035
APO-USP47	486	489	IYEL	536.285	6.0615	0	0	0
APO-USP47	486	489	IYEL	536.285	6.1023	30	0.027	0.006
APO-USP47	486	489	IYEL	536.285	6.1238	600	0.029	0
APO-USP47	486	489	IYEL	536.285	6.0711	3600	0.028	0.001
APO-USP47	490	492	FSV	351.179	5.2294	0	0	0
APO-USP47	490	492	FSV	351.179	5.238	30	0.016	0.005
APO-USP47	490	492	FSV	351.179	5.2318	600	0.022	0
APO-USP47	490	492	FSV	351.179	5.2534	3600	0.019	0.002
APO-USP47	508	513	IKSFSD	695.349	3.8059	0	0	0
APO-USP47	508	513	IKSFSD	695.349	3.9121	30	0.801	0.051
APO-USP47	508	513	IKSFSD	695.349	3.7495	600	0.922	0
APO-USP47	508	513	IKSFSD	695.349	3.9165	3600	1.097	0.048
APO-USP47	508	515	IKSFSDEQ	952.45	3.8185	0	0	0
APO-USP47	508	515	IKSFSDEQ	952.45	3.8077	30	0.969	0.013
APO-USP47	508	515	IKSFSDEQ	952.45	3.8183	600	1.376	0
APO-USP47	508	515	IKSFSDEQ	952.45	3.8133	3600	1.69	0.106
APO-USP47	508	516	IKSFSDEQW	1138.53	6.0256	0	0	0
APO-USP47	508	516	IKSFSDEQW	1138.53	6.0524	30	0.857	0.007
APO-USP47	508	516	IKSFSDEQW	1138.53	6.0661	600	1.221	0
APO-USP47	508	516	IKSFSDEQW	1138.53	6.039	3600	1.71	0.092
APO-USP47	509	516	KSFSDEQW	1025.45	5.6362	0	0	0
APO-USP47	509	516	KSFSDEQW	1025.45	5.6508	30	0.738	0.009
APO-USP47	509	516	KSFSDEQW	1025.45	5.6667	600	1.062	0
APO-USP47	509	516	KSFSDEQW	1025.45	5.6595	3600	1.357	0.044
APO-USP47	511	516	FSDEQW	810.318	6.1462	0	0	0
APO-USP47	511	516	FSDEQW	810.318	6.1534	30	0.283	0.046
APO-USP47	511	516	FSDEQW	810.318	6.1726	600	0.364	0
APO-USP47	511	516	FSDEQW	810.318	6.1344	3600	0.733	0.041
APO-USP47	512	516	SDEQW	663.25	5.2094	0	0	0
APO-USP47	512	516	SDEQW	663.25	5.2081	30	0.119	0.025
APO-USP47	512	516	SDEQW	663.25	5.2229	600	0.278	0
APO-USP47	512	516	SDEQW	663.25	5.2091	3600	0.519	0.065
APO-USP47	513	516	DEQW	576.218	5.2715	0	0	0
APO-USP47	513	516	DEQW	576.218	5.274	30	0.004	0
APO-USP47	513	516	DEQW	576.218	5.2651	600	0.087	0
APO-USP47	513	516	DEQW	576.218	5.2789	3600	0.286	0.028
APO-USP47	516	519	WYSF	601.254	7.3427	0	0	0
APO-USP47	516	519	WYSF	601.254	7.365	30	0.054	0.014
APO-USP47	516	519	WYSF	601.254	7.3753	600	0.059	0
APO-USP47	516	519	WYSF	601.254	7.3637	3600	0.072	0.011
APO-USP47	523	549	HVSRITQEDIKKTHGGSSGSRGYYSSA	2907.42	3.3676	0	0	0
APO-USP47	523	549	HVSRITQEDIKKTHGGSSGSRGYYSSA	2907.42	3.3883	30	9.211	0.191
APO-USP47	523	549	HVSRITQEDIKKTHGGSSGSRGYYSSA	2907.42	3.41	600	9.733	0
APO-USP47	523	549	HVSRITQEDIKKTHGGSSGSRGYYSSA	2907.42	3.4083	3600	9.47	0.054
APO-USP47	527	549	ITQEDIKKTHGGSSGSRGYYSSA	2428.16	3.5353	0	0	0
APO-USP47	527	549	ITQEDIKKTHGGSSGSRGYYSSA	2428.16	3.4815	30	8.881	0.144
APO-USP47	527	549	ITQEDIKKTHGGSSGSRGYYSSA	2428.16	3.5187	600	9.35	0
APO-USP47	527	549	ITQEDIKKTHGGSSGSRGYYSSA	2428.16	3.5281	3600	9.039	0.186
APO-USP47	531	543	DIKKTHGGSSGSR	1328.68	1.6875	0	0	0
APO-USP47	531	543	DIKKTHGGSSGSR	1328.68	1.6549	30	3.1	0.029
APO-USP47	531	543	DIKKTHGGSSGSR	1328.68	1.6609	600	3.349	0
APO-USP47	531	543	DIKKTHGGSSGSR	1328.68	1.6643	3600	3.184	0.042
APO-USP47	531	544	DIKKTHGGSSGSRG	1385.7	1.7047	0	0	0
APO-USP47	531	544	DIKKTHGGSSGSRG	1385.7	1.7362	30	4.296	0.116
APO-USP47	531	544	DIKKTHGGSSGSRG	1385.7	1.6546	600	4.498	0
APO-USP47	531	544	DIKKTHGGSSGSRG	1385.7	1.7437	3600	4.363	0.058
APO-USP47	531	545	DIKKTHGGSSGSRGY	1548.76	2.2914	0	0	0
APO-USP47	531	545	DIKKTHGGSSGSRGY	1548.76	2.2843	30	4.468	0.004
APO-USP47	531	545	DIKKTHGGSSGSRGY	1548.76	2.3027	600	4.752	0
APO-USP47	531	545	DIKKTHGGSSGSRGY	1548.76	2.27	3600	4.674	0.025
APO-USP47	531	549	DIKKTHGGSSGSRGYYSSA	1956.93	3.0209	0	0	0
APO-USP47	531	549	DIKKTHGGSSGSRGYYSSA	1956.93	3.051	30	5.929	0.031
APO-USP47	531	549	DIKKTHGGSSGSRGYYSSA	1956.93	3.0305	600	6.353	0
APO-USP47	531	549	DIKKTHGGSSGSRGYYSSA	1956.93	3.0688	3600	6.107	0.075
APO-USP47	532	545	IKKTHGGSSGSRGY	1433.74	1.9231	0	0	0
APO-USP47	532	545	IKKTHGGSSGSRGY	1433.74	1.9004	30	3.475	0.036
APO-USP47	532	545	IKKTHGGSSGSRGY	1433.74	1.9387	600	3.751	0
APO-USP47	532	545	IKKTHGGSSGSRGY	1433.74	1.9583	3600	3.453	0
APO-USP47	532	549	IKKTHGGSSGSRGYYSSA	1841.9	2.7402	0	0	0
APO-USP47	532	549	IKKTHGGSSGSRGYYSSA	1841.9	2.787	30	4.992	0.03
APO-USP47	532	549	IKKTHGGSSGSRGYYSSA	1841.9	2.7554	600	5.529	0
APO-USP47	532	549	IKKTHGGSSGSRGYYSSA	1841.9	2.7703	3600	5.227	0.023
APO-USP47	550	556	FASSTNA	696.308	2.932	0	0	0
APO-USP47	550	556	FASSTNA	696.308	2.9634	30	2.912	0.048
APO-USP47	550	556	FASSTNA	696.308	2.944	600	3.505	0
APO-USP47	550	556	FASSTNA	696.308	2.9778	3600	3.314	0.11
APO-USP47	550	558	FASSTNAYM	990.412	5.2582	0	0	0
APO-USP47	550	558	FASSTNAYM	990.412	5.2979	30	2.341	0.073
APO-USP47	550	558	FASSTNAYM	990.412	5.2651	600	3.086	0
APO-USP47	550	558	FASSTNAYM	990.412	5.2612	3600	2.962	0.016
APO-USP47	553	558	STNAYM	685.274	4.4978	0	0	0
APO-USP47	553	558	STNAYM	685.274	4.5112	30	0.778	0.034
APO-USP47	553	558	STNAYM	685.274	4.5084	600	1.319	0
APO-USP47	553	558	STNAYM	685.274	4.499	3600	1.325	0.066
APO-USP47	559	568	LIYRLKDPAR	1243.74	4.1781	0	0	0
APO-USP47	559	568	LIYRLKDPAR	1243.74	4.2494	30	0.882	0.015
APO-USP47	559	568	LIYRLKDPAR	1243.74	4.2621	600	1.213	0
APO-USP47	559	568	LIYRLKDPAR	1243.74	4.3037	3600	1.525	0.019
APO-USP47	559	571	LIYRLKDPARNAK	1556.92	3.8302	0	0	0
APO-USP47	559	571	LIYRLKDPARNAK	1556.92	3.8488	30	1.968	0.048
APO-USP47	559	571	LIYRLKDPARNAK	1556.92	3.8627	600	2.854	0
APO-USP47	559	571	LIYRLKDPARNAK	1556.92	3.8399	3600	3.266	0.099
APO-USP47	559	572	LIYRLKDPARNAKF	1703.98	4.7288	0	0	0
APO-USP47	559	572	LIYRLKDPARNAKF	1703.98	4.7065	30	2.601	0.01
APO-USP47	559	572	LIYRLKDPARNAKF	1703.98	4.7148	600	3.56	0
APO-USP47	559	572	LIYRLKDPARNAKF	1703.98	4.7098	3600	3.955	0.092
APO-USP47	560	568	IYRLKDPAR	1130.66	3.6886	0	0	0
APO-USP47	560	568	IYRLKDPAR	1130.66	3.6735	30	0.909	0.033
APO-USP47	560	568	IYRLKDPAR	1130.66	3.6874	600	1.202	0
APO-USP47	560	568	IYRLKDPAR	1130.66	3.6702	3600	1.575	0.054
APO-USP47	560	571	IYRLKDPARNAK	1443.83	3.2833	0	0	0
APO-USP47	560	571	IYRLKDPARNAK	1443.83	3.3284	30	1.829	0.073
APO-USP47	560	571	IYRLKDPARNAK	1443.83	3.3079	600	2.734	0
APO-USP47	560	571	IYRLKDPARNAK	1443.83	3.3251	3600	3.153	0.077
APO-USP47	560	572	IYRLKDPARNAKF	1590.9	4.3495	0	0	0
APO-USP47	560	572	IYRLKDPARNAKF	1590.9	4.3182	30	2.606	0.033
APO-USP47	560	572	IYRLKDPARNAKF	1590.9	4.3376	600	3.572	0
APO-USP47	560	572	IYRLKDPARNAKF	1590.9	4.3348	3600	3.962	0.119
APO-USP47	565	572	DPARNAKF	917.472	3.5222	0	0	0
APO-USP47	565	572	DPARNAKF	917.472	3.517	30	2.476	0.047
APO-USP47	565	572	DPARNAKF	917.472	3.4743	600	3.921	0
APO-USP47	565	572	DPARNAKF	917.472	3.4882	3600	4.223	0.01
APO-USP47	573	578	LEVDEY	766.338	5.2094	0	0	0
APO-USP47	573	578	LEVDEY	766.338	5.218	30	0.896	0.044
APO-USP47	573	578	LEVDEY	766.338	5.2318	600	1.491	0
APO-USP47	573	578	LEVDEY	766.338	5.2135	3600	1.852	0.081
APO-USP47	573	581	LEVDEYPEH	1129.49	4.4061	0	0	0
APO-USP47	573	581	LEVDEYPEH	1129.49	4.448	30	1.509	0.005
APO-USP47	573	581	LEVDEYPEH	1129.49	4.4507	600	2.093	0
APO-USP47	573	581	LEVDEYPEH	1129.49	4.3969	3600	2.383	0.054
APO-USP47	573	583	LEVDEYPEHIK	1370.67	4.6676	0	0	0
APO-USP47	573	583	LEVDEYPEHIK	1370.67	4.6999	30	1.216	0.041
APO-USP47	573	583	LEVDEYPEHIK	1370.67	4.697	600	1.933	0
APO-USP47	573	583	LEVDEYPEHIK	1370.67	4.6954	3600	2.292	0.11
APO-USP47	573	585	LEVDEYPEHIKNL	1597.8	5.5637	0	0	0
APO-USP47	573	585	LEVDEYPEHIKNL	1597.8	5.5409	30	1.464	0.036
APO-USP47	573	585	LEVDEYPEHIKNL	1597.8	5.5446	600	2.426	0
APO-USP47	573	585	LEVDEYPEHIKNL	1597.8	5.543	3600	3.14	0.18
APO-USP47	573	591	LEVDEYPEHIKNLVQKERE	2367.21	5.4616	0	0	0
APO-USP47	573	591	LEVDEYPEHIKNLVQKERE	2367.21	5.4411	30	2.991	0.032
APO-USP47	573	591	LEVDEYPEHIKNLVQKERE	2367.21	5.4381	600	6.109	0
APO-USP47	573	591	LEVDEYPEHIKNLVQKERE	2367.21	5.462	3600	7.194	0.423
APO-USP47	573	600	LEVDEYPEHIKNLVQKERELEEQEKRQR	3563.83	5.5408	0	0	0
APO-USP47	573	600	LEVDEYPEHIKNLVQKERELEEQEKRQR	3563.83	5.552	30	8.704	0.302
APO-USP47	573	600	LEVDEYPEHIKNLVQKERELEEQEKRQR	3563.83	5.5424	600	13.251	0
APO-USP47	573	600	LEVDEYPEHIKNLVQKERELEEQEKRQR	3563.83	5.5497	3600	13.921	0.439
APO-USP47	573	607	LEVDEYPEHIKNLVQKERELEEQEKRQREIERNTC	4409.2	5.5197	0	0	0
APO-USP47	573	607	LEVDEYPEHIKNLVQKERELEEQEKRQREIERNTC	4409.2	5.4987	30	12.519	0.272
APO-USP47	573	607	LEVDEYPEHIKNLVQKERELEEQEKRQREIERNTC	4409.2	5.518	600	18.386	0
APO-USP47	573	607	LEVDEYPEHIKNLVQKERELEEQEKRQREIERNTC	4409.2	5.5053	3600	19.206	0.709
APO-USP47	573	608	LEVDEYPEHIKNLVQKERELEEQEKRQREIERNTCK	4537.3	5.3858	0	0	0
APO-USP47	573	608	LEVDEYPEHIKNLVQKERELEEQEKRQREIERNTCK	4537.3	5.4255	30	13.551	0.371
APO-USP47	573	608	LEVDEYPEHIKNLVQKERELEEQEKRQREIERNTCK	4537.3	5.4204	600	20.006	0
APO-USP47	573	608	LEVDEYPEHIKNLVQKERELEEQEKRQREIERNTCK	4537.3	5.4232	3600	21.088	0.325
APO-USP47	573	611	LEVDEYPEHIKNLVQKERELEEQEKRQREIERNTCKIKL	4891.56	5.6881	0	0	0
APO-USP47	573	611	LEVDEYPEHIKNLVQKERELEEQEKRQREIERNTCKIKL	4891.56	5.7073	30	12.22	0.276
APO-USP47	573	611	LEVDEYPEHIKNLVQKERELEEQEKRQREIERNTCKIKL	4891.56	5.6978	600	18.186	0
APO-USP47	573	611	LEVDEYPEHIKNLVQKERELEEQEKRQREIERNTCKIKL	4891.56	5.7261	3600	19.615	0.642
APO-USP47	584	590	NLVQKER	885.503	2.5703	0	0	0
APO-USP47	584	590	NLVQKER	885.503	2.5661	30	0.984	0.115
APO-USP47	584	590	NLVQKER	885.503	2.5579	600	2.771	0
APO-USP47	584	590	NLVQKER	885.503	2.5606	3600	3.108	0.152
APO-USP47	584	591	NLVQKERE	1014.55	2.8477	0	0	0
APO-USP47	584	591	NLVQKERE	1014.55	2.838	30	1.07	0.091
APO-USP47	584	591	NLVQKERE	1014.55	2.8397	600	3.1	0
APO-USP47	584	591	NLVQKERE	1014.55	2.8713	3600	3.373	0.148
APO-USP47	585	591	LVQKERE	900.503	1.9948	0	0	0
APO-USP47	585	591	LVQKERE	900.503	1.9936	30	1.223	0.06
APO-USP47	585	591	LVQKERE	900.503	2.0453	600	3.061	0
APO-USP47	585	591	LVQKERE	900.503	1.9937	3600	3.291	0.223
APO-USP47	586	592	VQKEREL	900.503	3.0082	0	0	0
APO-USP47	586	592	VQKEREL	900.503	3.0044	30	1.231	0.084
APO-USP47	586	592	VQKEREL	900.503	3.0106	600	3.328	0
APO-USP47	586	592	VQKEREL	900.503	3.0078	3600	3.252	0.089
APO-USP47	586	608	VQKERELEEQEKRQREIERNTCK	2957.51	3.5373	0	0	0
APO-USP47	586	608	VQKERELEEQEKRQREIERNTCK	2957.51	3.5847	30	9.502	0.046
APO-USP47	586	608	VQKERELEEQEKRQREIERNTCK	2957.51	3.643	600	12.22	0
APO-USP47	586	608	VQKERELEEQEKRQREIERNTCK	2957.51	3.5459	3600	12.961	0.479
APO-USP47	586	611	VQKERELEEQEKRQREIERNTCKIKL	3311.77	4.5745	0	0	0
APO-USP47	586	611	VQKERELEEQEKRQREIERNTCKIKL	3311.77	4.5345	30	10.003	0.197
APO-USP47	586	611	VQKERELEEQEKRQREIERNTCKIKL	3311.77	4.5195	600	13.343	0
APO-USP47	586	611	VQKERELEEQEKRQREIERNTCKIKL	3311.77	4.4934	3600	13.809	0.17
APO-USP47	591	600	ELEEQEKRQR	1343.68	2.2519	0	0	0
APO-USP47	591	600	ELEEQEKRQR	1343.68	2.2422	30	4.283	0.107
APO-USP47	591	600	ELEEQEKRQR	1343.68	2.245	600	5.093	0
APO-USP47	591	600	ELEEQEKRQR	1343.68	2.2367	3600	4.967	0.09
APO-USP47	591	604	ELEEQEKRQREIER	1870.95	3	0	0	0
APO-USP47	591	604	ELEEQEKRQREIER	1870.95	3.4039	30	9.392	0.004
APO-USP47	591	604	ELEEQEKRQREIER	1870.95	3.3856	600	9.898	0
APO-USP47	591	604	ELEEQEKRQREIER	1870.95	3.3994	3600	10.182	0.083
APO-USP47	592	600	LEEQEKRQR	1214.64	1.8506	0	0	0
APO-USP47	592	600	LEEQEKRQR	1214.64	1.8025	30	4.137	0.103
APO-USP47	592	600	LEEQEKRQR	1214.64	1.8478	600	4.444	0
APO-USP47	592	600	LEEQEKRQR	1214.64	1.8494	3600	4.334	0.066
APO-USP47	592	611	LEEQEKRQREIERNTCKIKL	2542.36	4.3623	0	0	0
APO-USP47	592	611	LEEQEKRQREIERNTCKIKL	2542.36	4.408	30	7.059	0.036
APO-USP47	592	611	LEEQEKRQREIERNTCKIKL	2542.36	4.3952	600	7.987	0
APO-USP47	592	611	LEEQEKRQREIERNTCKIKL	2542.36	4.3403	3600	8.634	0.099
APO-USP47	595	611	QEKRQREIERNTCKIKL	2171.2	3.9032	0	0	0
APO-USP47	595	611	QEKRQREIERNTCKIKL	2171.2	3.9276	30	4.842	0.04
APO-USP47	595	611	QEKRQREIERNTCKIKL	2171.2	3.9914	600	5.545	0
APO-USP47	595	611	QEKRQREIERNTCKIKL	2171.2	3.9387	3600	6.163	0.252
APO-USP47	596	611	EKRQREIERNTCKIKL	2043.14	3.8768	0	0	0
APO-USP47	596	611	EKRQREIERNTCKIKL	2043.14	3.9442	30	4.331	0.045
APO-USP47	596	611	EKRQREIERNTCKIKL	2043.14	3.9692	600	5.23	0
APO-USP47	596	611	EKRQREIERNTCKIKL	2043.14	3.942	3600	5.721	0.137
APO-USP47	602	611	IERNTCKIKL	1216.7	4.4217	0	0	0
APO-USP47	602	611	IERNTCKIKL	1216.7	4.4036	30	1.067	0.04
APO-USP47	602	611	IERNTCKIKL	1216.7	4.3975	600	1.664	0
APO-USP47	602	611	IERNTCKIKL	1216.7	4.3958	3600	2.325	0.14
APO-USP47	612	619	FCLHPTKQ	972.485	4.0262	0	0	0
APO-USP47	612	619	FCLHPTKQ	972.485	4.0663	30	1.573	0.055
APO-USP47	612	619	FCLHPTKQ	972.485	3.9981	600	2.321	0
APO-USP47	612	619	FCLHPTKQ	972.485	4.0519	3600	2.526	0.063
APO-USP47	612	621	FCLHPTKQVM	1202.59	4.9527	0	0	0
APO-USP47	612	621	FCLHPTKQVM	1202.59	5.0538	30	2.152	0.096
APO-USP47	612	621	FCLHPTKQVM	1202.59	4.9788	600	2.897	0
APO-USP47	612	621	FCLHPTKQVM	1202.59	4.9716	3600	3.279	0.114
APO-USP47	612	622	FCLHPTKQVMM	1333.63	5.391	0	0	0
APO-USP47	612	622	FCLHPTKQVMM	1333.63	5.3867	30	2.697	0.101
APO-USP47	612	622	FCLHPTKQVMM	1333.63	5.4093	600	3.569	0
APO-USP47	612	622	FCLHPTKQVMM	1333.63	5.3966	3600	4.07	0.028
APO-USP47	612	623	FCLHPTKQVMME	1462.68	5.2715	0	0	0
APO-USP47	612	623	FCLHPTKQVMME	1462.68	5.2979	30	2.749	0.027
APO-USP47	612	623	FCLHPTKQVMME	1462.68	5.2961	600	3.604	0
APO-USP47	612	623	FCLHPTKQVMME	1462.68	5.2956	3600	3.992	0.157
APO-USP47	622	626	MENKL	633.316	3.6942	0	0	0
APO-USP47	622	626	MENKL	633.316	3.6957	30	0.717	0.017
APO-USP47	622	626	MENKL	633.316	3.7074	600	0.773	0
APO-USP47	622	626	MENKL	633.316	3.6968	3600	0.74	0.014
APO-USP47	622	639	MENKLEVHKDKTLKEAVE	2140.12	3.7772	0	0	0
APO-USP47	622	639	MENKLEVHKDKTLKEAVE	2140.12	3.7611	30	1.029	0.014
APO-USP47	622	639	MENKLEVHKDKTLKEAVE	2140.12	3.7628	600	1.504	0
APO-USP47	622	639	MENKLEVHKDKTLKEAVE	2140.12	3.7678	3600	1.75	0.102
APO-USP47	623	636	ENKLEVHKDKTLKE	1709.93	2.7903	0	0	0
APO-USP47	623	636	ENKLEVHKDKTLKE	1709.93	2.7969	30	0.749	0.096
APO-USP47	623	636	ENKLEVHKDKTLKE	1709.93	2.7865	600	1.222	0
APO-USP47	623	636	ENKLEVHKDKTLKE	1709.93	2.7981	3600	1.499	0.046
APO-USP47	623	637	ENKLEVHKDKTLKEA	1780.97	2.9349	0	0	0
APO-USP47	623	637	ENKLEVHKDKTLKEA	1780.97	2.9567	30	1.053	0.353
APO-USP47	623	637	ENKLEVHKDKTLKEA	1780.97	3.0239	600	1.116	0
APO-USP47	623	637	ENKLEVHKDKTLKEA	1780.97	3.0044	3600	1.098	0.131
APO-USP47	623	639	ENKLEVHKDKTLKEAVE	2009.08	3.5523	0	0	0
APO-USP47	623	639	ENKLEVHKDKTLKEAVE	2009.08	3.547	30	0.83	0.065
APO-USP47	623	639	ENKLEVHKDKTLKEAVE	2009.08	3.5498	600	1.28	0
APO-USP47	623	639	ENKLEVHKDKTLKEAVE	2009.08	3.5392	3600	1.435	0.142
APO-USP47	625	636	KLEVHKDKTLKE	1466.85	2.5318	0	0	0
APO-USP47	625	636	KLEVHKDKTLKE	1466.85	2.544	30	0.454	0.021
APO-USP47	625	636	KLEVHKDKTLKE	1466.85	2.5512	600	0.85	0
APO-USP47	625	636	KLEVHKDKTLKE	1466.85	2.5174	3600	1.109	0.098
APO-USP47	625	637	KLEVHKDKTLKEA	1537.88	2.6505	0	0	0
APO-USP47	625	637	KLEVHKDKTLKEA	1537.88	2.6716	30	0.189	0.132
APO-USP47	625	637	KLEVHKDKTLKEA	1537.88	2.6444	600	0.434	0
APO-USP47	625	637	KLEVHKDKTLKEA	1537.88	2.6394	3600	0.71	0.034
APO-USP47	625	639	KLEVHKDKTLKEAVE	1765.99	3.387	0	0	0
APO-USP47	625	639	KLEVHKDKTLKEAVE	1765.99	3.4072	30	0.423	0.006
APO-USP47	625	639	KLEVHKDKTLKEAVE	1765.99	3.43	600	0.746	0
APO-USP47	625	639	KLEVHKDKTLKEAVE	1765.99	3.4061	3600	1.024	0.11
APO-USP47	626	636	LEVHKDKTLKE	1338.75	2.6746	0	0	0
APO-USP47	626	636	LEVHKDKTLKE	1338.75	2.7126	30	0.322	0.056
APO-USP47	626	636	LEVHKDKTLKE	1338.75	2.6555	600	0.464	0
APO-USP47	626	636	LEVHKDKTLKE	1338.75	2.6461	3600	0.71	0.085
APO-USP47	626	637	LEVHKDKTLKEA	1409.79	2.7804	0	0	0
APO-USP47	626	637	LEVHKDKTLKEA	1409.79	2.7936	30	0.371	0.156
APO-USP47	626	637	LEVHKDKTLKEA	1409.79	2.8086	600	0.544	0
APO-USP47	626	637	LEVHKDKTLKEA	1409.79	2.8036	3600	0.727	0.073
APO-USP47	627	636	EVHKDKTLKE	1225.67	1.9157	0	0	0
APO-USP47	627	636	EVHKDKTLKE	1225.67	1.9259	30	0.337	0.051
APO-USP47	627	636	EVHKDKTLKE	1225.67	1.8966	600	0.459	0
APO-USP47	627	636	EVHKDKTLKE	1225.67	1.9482	3600	0.678	0.014
APO-USP47	627	637	EVHKDKTLKEA	1296.7	2.061	0	0	0
APO-USP47	627	637	EVHKDKTLKEA	1296.7	2.0879	30	0.304	0.069
APO-USP47	627	637	EVHKDKTLKEA	1296.7	2.0608	600	0.381	0
APO-USP47	627	637	EVHKDKTLKEA	1296.7	2.0957	3600	0.622	0.058
APO-USP47	627	639	EVHKDKTLKEAVE	1524.81	3.1112	0	0	0
APO-USP47	627	639	EVHKDKTLKEAVE	1524.81	3.1542	30	0.261	0.035
APO-USP47	627	639	EVHKDKTLKEAVE	1524.81	3.1237	600	0.471	0
APO-USP47	627	639	EVHKDKTLKEAVE	1524.81	3.111	3600	0.694	0.112
APO-USP47	628	639	VHKDKTLKEAVE	1395.77	2.9353	0	0	0
APO-USP47	628	639	VHKDKTLKEAVE	1395.77	2.9712	30	0.191	0.022
APO-USP47	628	639	VHKDKTLKEAVE	1395.77	3.0283	600	0.273	0
APO-USP47	628	639	VHKDKTLKEAVE	1395.77	3.0078	3600	0.489	0.024
APO-USP47	638	640	VEM	377.162	3.8196	0	0	0
APO-USP47	638	640	VEM	377.162	3.8366	30	0.1	0.028
APO-USP47	638	640	VEM	377.162	3.8228	600	0.105	0
APO-USP47	638	640	VEM	377.162	3.8277	3600	0.093	0.019
APO-USP47	640	642	MAY	383.151	4.202	0	0	0
APO-USP47	640	642	MAY	383.151	4.2305	30	0.013	0.007
APO-USP47	640	642	MAY	383.151	4.2466	600	0.015	0
APO-USP47	640	642	MAY	383.151	4.236	3600	0.019	0.001
APO-USP47	640	646	MAYKMMD	888.354	4.9342	0	0	0
APO-USP47	640	646	MAYKMMD	888.354	4.9162	30	0.23	0.021
APO-USP47	640	646	MAYKMMD	888.354	4.981	600	0.541	0
APO-USP47	640	646	MAYKMMD	888.354	4.9417	3600	0.599	0.005
APO-USP47	641	647	AYKMMDL	870.398	6.1891	0	0	0
APO-USP47	641	647	AYKMMDL	870.398	6.1356	30	0.286	0.057
APO-USP47	641	647	AYKMMDL	870.398	6.0883	600	0.553	0
APO-USP47	641	647	AYKMMDL	870.398	6.1455	3600	0.853	0.007
APO-USP47	642	647	YKMMDL	799.361	6.1177	0	0	0
APO-USP47	642	647	YKMMDL	799.361	6.129	30	0.158	0.026
APO-USP47	642	647	YKMMDL	799.361	6.1371	600	0.367	0
APO-USP47	642	647	YKMMDL	799.361	6.1166	3600	0.663	0.093
APO-USP47	648	653	EEVIPL	698.385	6.1876	0	0	0
APO-USP47	648	653	EEVIPL	698.385	6.2055	30	0.63	0.03
APO-USP47	648	653	EEVIPL	698.385	6.2525	600	1.148	0
APO-USP47	648	653	EEVIPL	698.385	6.2453	3600	1.429	0.037
APO-USP47	648	656	EEVIPLDCC	1019.43	6.8175	0	0	0
APO-USP47	648	656	EEVIPLDCC	1019.43	6.8468	30	0.839	0.024
APO-USP47	648	656	EEVIPLDCC	1019.43	6.8405	600	1.493	0
APO-USP47	648	656	EEVIPLDCC	1019.43	6.8733	3600	1.834	0.043
APO-USP47	648	658	EEVIPLDCCRL	1288.62	7.2302	0	0	0
APO-USP47	648	658	EEVIPLDCCRL	1288.62	7.1741	30	0.733	0.031
APO-USP47	648	658	EEVIPLDCCRL	1288.62	7.0336	600	1.541	0
APO-USP47	648	658	EEVIPLDCCRL	1288.62	7.1762	3600	2.111	0.21
APO-USP47	657	664	RLVKYDEF	1068.56	5.1916	0	0	0
APO-USP47	657	664	RLVKYDEF	1068.56	5.222	30	0.814	0
APO-USP47	657	664	RLVKYDEF	1068.56	5.3361	600	1.236	0
APO-USP47	657	664	RLVKYDEF	1068.56	5.3355	3600	1.268	0.018
APO-USP47	657	667	RLVKYDEFHDY	1483.71	4.9635	0	0	0
APO-USP47	657	667	RLVKYDEFHDY	1483.71	4.9806	30	0.723	0.044
APO-USP47	657	667	RLVKYDEFHDY	1483.71	5.0077	600	1.4	0
APO-USP47	657	667	RLVKYDEFHDY	1483.71	4.9583	3600	1.214	0.103
APO-USP47	658	667	LVKYDEFHDY	1327.61	5.8408	0	0	0
APO-USP47	658	667	LVKYDEFHDY	1327.61	5.998	30	1.672	0.044
APO-USP47	658	667	LVKYDEFHDY	1327.61	5.9884	600	2.368	0
APO-USP47	658	667	LVKYDEFHDY	1327.61	5.9746	3600	2.388	0.046
APO-USP47	659	664	VKYDEF	799.375	5.3381	0	0	0
APO-USP47	659	664	VKYDEF	799.375	5.3146	30	0.915	0.055
APO-USP47	659	664	VKYDEF	799.375	5.3139	600	1.477	0
APO-USP47	659	664	VKYDEF	799.375	5.3167	3600	1.399	0.029
APO-USP47	659	667	VKYDEFHDY	1214.52	5.0348	0	0	0
APO-USP47	659	667	VKYDEFHDY	1214.52	5.0904	30	0.748	0.012
APO-USP47	659	667	VKYDEFHDY	1214.52	5.0609	600	1.28	0
APO-USP47	659	667	VKYDEFHDY	1214.52	5.0604	3600	1.206	0.005
APO-USP47	659	668	VKYDEFHDYL	1327.61	6.1493	0	0	0
APO-USP47	659	668	VKYDEFHDYL	1327.61	6.1478	30	1.623	0.03
APO-USP47	659	668	VKYDEFHDYL	1327.61	6.1482	600	2.397	0
APO-USP47	659	668	VKYDEFHDYL	1327.61	6.1211	3600	2.332	0.077
APO-USP47	662	668	DEFHDYL	937.382	6.3574	0	0	0
APO-USP47	662	668	DEFHDYL	937.382	6.3231	30	1.402	0.063
APO-USP47	662	668	DEFHDYL	937.382	6.2436	600	2.163	0
APO-USP47	662	668	DEFHDYL	937.382	6.3274	3600	2.063	0.037
APO-USP47	665	683	HDYLERSYEGEEDTPMGLL	2252.99	6.8885	0	0	0
APO-USP47	665	683	HDYLERSYEGEEDTPMGLL	2252.99	6.8634	30	3.957	0.168
APO-USP47	665	683	HDYLERSYEGEEDTPMGLL	2252.99	6.9182	600	4.885	0
APO-USP47	665	683	HDYLERSYEGEEDTPMGLL	2252.99	6.9055	3600	5.137	0.198
APO-USP47	668	677	LERSYEGEED	1225.51	3.4327	0	0	0
APO-USP47	668	677	LERSYEGEED	1225.51	3.5237	30	3.354	0.068
APO-USP47	668	677	LERSYEGEED	1225.51	3.5032	600	4.062	0
APO-USP47	668	677	LERSYEGEED	1225.51	3.5337	3600	3.99	0.035
APO-USP47	668	682	LERSYEGEEDTPMGL	1724.76	5.9091	0	0	0
APO-USP47	668	682	LERSYEGEEDTPMGL	1724.76	5.9259	30	2.856	0.124
APO-USP47	668	682	LERSYEGEEDTPMGL	1724.76	5.9263	600	3.401	0
APO-USP47	668	682	LERSYEGEEDTPMGL	1724.76	5.9269	3600	3.69	0.171
APO-USP47	668	683	LERSYEGEEDTPMGLL	1837.84	7.035	0	0	0
APO-USP47	668	683	LERSYEGEEDTPMGLL	1837.84	7.1142	30	2.745	0.052
APO-USP47	668	683	LERSYEGEEDTPMGLL	1837.84	7.1246	600	3.343	0
APO-USP47	668	683	LERSYEGEEDTPMGLL	1837.84	7.0952	3600	3.618	0.127
APO-USP47	668	688	LERSYEGEEDTPMGLLLGGVK	2292.13	7.5283	0	0	0
APO-USP47	668	688	LERSYEGEEDTPMGLLLGGVK	2292.13	7.5813	30	4.646	0.142
APO-USP47	668	688	LERSYEGEEDTPMGLLLGGVK	2292.13	7.5218	600	5.862	0
APO-USP47	668	688	LERSYEGEEDTPMGLLLGGVK	2292.13	7.5168	3600	6.197	0.212
APO-USP47	669	677	ERSYEGEED	1112.43	3.0237	0	0	0
APO-USP47	669	677	ERSYEGEED	1112.43	3.03	30	2.83	0.019
APO-USP47	669	677	ERSYEGEED	1112.43	3.0372	600	3.275	0
APO-USP47	669	677	ERSYEGEED	1112.43	3.0211	3600	3.198	0.077
APO-USP47	669	682	ERSYEGEEDTPMGL	1611.67	5.7486	0	0	0
APO-USP47	669	682	ERSYEGEEDTPMGL	1611.67	5.8039	30	2.5	0.011
APO-USP47	669	682	ERSYEGEEDTPMGL	1611.67	5.751	600	3.098	0
APO-USP47	669	682	ERSYEGEEDTPMGL	1611.67	5.7416	3600	3.326	0.129
APO-USP47	671	683	SYEGEEDTPMGLL	1439.61	7.3589	0	0	0
APO-USP47	671	683	SYEGEEDTPMGLL	1439.61	7.3583	30	1.506	0.023
APO-USP47	671	683	SYEGEEDTPMGLL	1439.61	7.3398	600	1.996	0
APO-USP47	671	683	SYEGEEDTPMGLL	1439.61	7.3615	3600	2.279	0.104
APO-USP47	671	688	SYEGEEDTPMGLLLGGVK	1893.9	7.863	0	0	0
APO-USP47	671	688	SYEGEEDTPMGLLLGGVK	1893.9	7.8143	30	3.417	0.114
APO-USP47	671	688	SYEGEEDTPMGLLLGGVK	1893.9	7.8414	600	4.506	0
APO-USP47	671	688	SYEGEEDTPMGLLLGGVK	1893.9	7.8243	3600	4.905	0.153
APO-USP47	672	683	YEGEEDTPMGLL	1352.58	7.4181	0	0	0
APO-USP47	672	683	YEGEEDTPMGLL	1352.58	7.4848	30	1.211	0.022
APO-USP47	672	683	YEGEEDTPMGLL	1352.58	7.3775	600	1.737	0
APO-USP47	672	683	YEGEEDTPMGLL	1352.58	7.3813	3600	2.081	0
APO-USP47	672	692	YEGEEDTPMGLLLGGVKSTYM	2289.05	8.3271	0	0	0
APO-USP47	672	692	YEGEEDTPMGLLLGGVKSTYM	2289.05	8.3063	30	6.483	0
APO-USP47	672	692	YEGEEDTPMGLLLGGVKSTYM	2289.05	8.3185	600	7.808	0
APO-USP47	672	692	YEGEEDTPMGLLLGGVKSTYM	2289.05	8.3414	3600	8.199	0.235
APO-USP47	674	688	GEEDTPMGLLLGGVK	1514.77	7.714	0	0	0
APO-USP47	674	688	GEEDTPMGLLLGGVK	1514.77	7.6922	30	2.614	0.085
APO-USP47	674	688	GEEDTPMGLLLGGVK	1514.77	7.7259	600	3.466	0
APO-USP47	674	688	GEEDTPMGLLLGGVK	1514.77	7.7188	3600	3.603	0.253
APO-USP47	675	683	EEDTPMGLL	1003.45	7.1156	0	0	0
APO-USP47	675	683	EEDTPMGLL	1003.45	7.1142	30	0.141	0.013
APO-USP47	675	683	EEDTPMGLL	1003.45	7.1623	600	0.225	0
APO-USP47	675	683	EEDTPMGLL	1003.45	7.1185	3600	0.58	0.072
APO-USP47	677	691	DTPMGLLLGGVKSTY	1550.8	7.745	0	0	0
APO-USP47	677	691	DTPMGLLLGGVKSTY	1550.8	7.72	30	3.917	0.134
APO-USP47	677	691	DTPMGLLLGGVKSTY	1550.8	7.7348	600	4.858	0
APO-USP47	677	691	DTPMGLLLGGVKSTY	1550.8	7.7477	3600	5.211	0.211
APO-USP47	677	692	DTPMGLLLGGVKSTYM	1681.84	8.0121	0	0	0
APO-USP47	677	692	DTPMGLLLGGVKSTYM	1681.84	8.014	30	5.375	0.138
APO-USP47	677	692	DTPMGLLLGGVKSTYM	1681.84	8.0145	600	6.277	0
APO-USP47	677	692	DTPMGLLLGGVKSTYM	1681.84	8.003	3600	6.782	0.204
APO-USP47	682	688	LLLGGVK	698.469	5.1273	0	0	0
APO-USP47	682	688	LLLGGVK	698.469	5.1515	30	2.115	0.031
APO-USP47	682	688	LLLGGVK	698.469	5.1319	600	2.709	0
APO-USP47	682	688	LLLGGVK	698.469	5.1491	3600	2.698	0.062
APO-USP47	683	693	LLGGVKSTYMF	1214.64	6.5112	0	0	0
APO-USP47	683	693	LLGGVKSTYMF	1214.64	6.4152	30	3.286	0.013
APO-USP47	683	693	LLGGVKSTYMF	1214.64	6.41	600	3.415	0
APO-USP47	683	693	LLGGVKSTYMF	1214.64	6.4517	3600	3.404	0.111
APO-USP47	684	692	LGGVKSTYM	954.484	4.7327	0	0	0
APO-USP47	684	692	LGGVKSTYM	954.484	4.7576	30	3.952	0.06
APO-USP47	684	692	LGGVKSTYM	954.484	4.7347	600	4.187	0
APO-USP47	684	692	LGGVKSTYM	954.484	4.7519	3600	4.08	0.089
APO-USP47	684	693	LGGVKSTYMF	1101.55	6.3071	0	0	0
APO-USP47	684	693	LGGVKSTYMF	1101.55	6.3941	30	3.814	0.058
APO-USP47	684	693	LGGVKSTYMF	1101.55	6.3146	600	4.268	0
APO-USP47	684	693	LGGVKSTYMF	1101.55	6.3041	3600	4.614	0.224
APO-USP47	693	696	FDLL	506.274	7.322	0	0	0
APO-USP47	693	696	FDLL	506.274	7.3883	30	0.027	0.002
APO-USP47	693	696	FDLL	506.274	7.3309	600	0.021	0
APO-USP47	693	696	FDLL	506.274	7.3937	3600	0.026	0.004
APO-USP47	695	706	LLLETRKPDQVF	1457.82	5.8777	0	0	0
APO-USP47	695	706	LLLETRKPDQVF	1457.82	5.9126	30	2.409	0.046
APO-USP47	695	706	LLLETRKPDQVF	1457.82	5.9086	600	3.376	0
APO-USP47	695	706	LLLETRKPDQVF	1457.82	5.9169	3600	3.565	0.141
APO-USP47	697	715	LETRKPDQVFQSYKPGEVM	2251.13	5.431	0	0	0
APO-USP47	697	715	LETRKPDQVFQSYKPGEVM	2251.13	5.471	30	6.038	0.062
APO-USP47	697	715	LETRKPDQVFQSYKPGEVM	2251.13	5.4714	600	7.67	0
APO-USP47	697	715	LETRKPDQVFQSYKPGEVM	2251.13	5.462	3600	7.984	0.19
APO-USP47	698	706	ETRKPDQVF	1118.57	4.5655	0	0	0
APO-USP47	698	706	ETRKPDQVF	1118.57	4.5401	30	2.069	0.016
APO-USP47	698	706	ETRKPDQVF	1118.57	4.5661	600	3.047	0
APO-USP47	698	706	ETRKPDQVF	1118.57	4.5567	3600	3.121	0.043
APO-USP47	698	715	ETRKPDQVFQSYKPGEVM	2138.05	5.3701	0	0	0
APO-USP47	698	715	ETRKPDQVFQSYKPGEVM	2138.05	5.3268	30	6.279	0.187
APO-USP47	698	715	ETRKPDQVFQSYKPGEVM	2138.05	5.3227	600	7.994	0
APO-USP47	698	715	ETRKPDQVFQSYKPGEVM	2138.05	5.3244	3600	8.005	0.207
APO-USP47	704	715	QVFQSYKPGEVM	1411.68	5.6584	0	0	0
APO-USP47	704	715	QVFQSYKPGEVM	1411.68	5.6918	30	4.365	0.032
APO-USP47	704	715	QVFQSYKPGEVM	1411.68	5.6645	600	5.188	0
APO-USP47	704	715	QVFQSYKPGEVM	1411.68	5.6983	3600	5.268	0.169
APO-USP47	707	715	QSYKPGEVM	1037.49	4.5123	0	0	0
APO-USP47	707	715	QSYKPGEVM	1037.49	4.499	30	2.597	0.031
APO-USP47	707	715	QSYKPGEVM	1037.49	4.5062	600	3.382	0
APO-USP47	707	715	QSYKPGEVM	1037.49	4.4901	3600	3.531	0.093
APO-USP47	716	723	VKVHVVDL	907.549	4.9335	0	0	0
APO-USP47	716	723	VKVHVVDL	907.549	4.9584	30	0.224	0.009
APO-USP47	716	723	VKVHVVDL	907.549	4.9544	600	0.622	0
APO-USP47	716	723	VKVHVVDL	907.549	4.9505	3600	0.778	0.031
APO-USP47	716	736	VKVHVVDLKAESVAAPITVRA	2201.29	4.9774	0	0	0
APO-USP47	716	736	VKVHVVDLKAESVAAPITVRA	2201.29	5.0128	30	3.781	0.017
APO-USP47	716	736	VKVHVVDLKAESVAAPITVRA	2201.29	4.9611	600	5.373	0
APO-USP47	716	736	VKVHVVDLKAESVAAPITVRA	2201.29	4.9761	3600	6.026	0.112
APO-USP47	720	723	VVDL	444.258	5.0422	0	0	0
APO-USP47	720	723	VVDL	444.258	5.0816	30	0.142	0.004
APO-USP47	720	723	VVDL	444.258	5.0875	600	0.588	0
APO-USP47	720	723	VVDL	444.258	5.0526	3600	0.762	0.028
APO-USP47	727	734	SVAAPITV	756.438	5.1931	0	0	0
APO-USP47	727	734	SVAAPITV	756.438	5.2147	30	1.526	0.003
APO-USP47	727	734	SVAAPITV	756.438	5.2029	600	1.711	0
APO-USP47	727	734	SVAAPITV	756.438	5.1747	3600	1.859	0.102
APO-USP47	727	735	SVAAPITVR	912.539	4.1184	0	0	0
APO-USP47	727	735	SVAAPITVR	912.539	4.1184	30	2.111	0.057
APO-USP47	727	735	SVAAPITVR	912.539	4.1312	600	2.614	0
APO-USP47	727	735	SVAAPITVR	912.539	4.1195	3600	2.76	0.027
APO-USP47	727	736	SVAAPITVRA	983.576	4.4875	0	0	0
APO-USP47	727	736	SVAAPITVRA	983.576	4.4746	30	2.121	0.048
APO-USP47	727	736	SVAAPITVRA	983.576	4.4707	600	2.585	0
APO-USP47	727	736	SVAAPITVRA	983.576	4.4713	3600	2.746	0.095
APO-USP47	737	744	YLNQTVTE	966.466	4.2878	0	0	0
APO-USP47	737	744	YLNQTVTE	966.466	4.2826	30	1.418	0.055
APO-USP47	737	744	YLNQTVTE	966.466	4.2865	600	2.394	0
APO-USP47	737	744	YLNQTVTE	966.466	4.3059	3600	2.715	0.151
APO-USP47	738	744	LNQTVTE	803.403	3.2929	0	0	0
APO-USP47	738	744	LNQTVTE	803.403	3.3129	30	0.752	0.004
APO-USP47	738	744	LNQTVTE	803.403	3.3079	600	1.765	0
APO-USP47	738	744	LNQTVTE	803.403	3.294	3600	2.071	0.109
APO-USP47	739	744	NQTVTE	690.318	2.6117	0	0	0
APO-USP47	739	744	NQTVTE	690.318	2.615	30	0.725	0.059
APO-USP47	739	744	NQTVTE	690.318	2.6023	600	1.624	0
APO-USP47	739	744	NQTVTE	690.318	2.6228	3600	1.911	0.144
APO-USP47	740	744	QTVTE	576.275	2.5392	0	0	0
APO-USP47	740	744	QTVTE	576.275	2.5562	30	0.722	0.058
APO-USP47	740	744	QTVTE	576.275	2.5291	600	1.646	0
APO-USP47	740	744	QTVTE	576.275	2.5362	3600	1.781	0.074
APO-USP47	745	759	FKQLISKAIHLPAET	1694.97	5.5038	0	0	0
APO-USP47	745	759	FKQLISKAIHLPAET	1694.97	5.7462	30	2.925	0.051
APO-USP47	745	759	FKQLISKAIHLPAET	1694.97	5.7555	600	4.194	0
APO-USP47	745	759	FKQLISKAIHLPAET	1694.97	5.7571	3600	4.825	0.125
APO-USP47	745	760	FKQLISKAIHLPAETM	1826.01	5.7428	0	0	0
APO-USP47	745	760	FKQLISKAIHLPAETM	1826.01	5.7428	30	3.644	0.169
APO-USP47	745	760	FKQLISKAIHLPAETM	1826.01	5.7	600	4.352	0
APO-USP47	745	760	FKQLISKAIHLPAETM	1826.01	5.7183	3600	5.228	0.213
APO-USP47	748	759	LISKAIHLPAET	1291.75	4.9235	0	0	0
APO-USP47	748	759	LISKAIHLPAET	1291.75	4.9351	30	2.331	0.046
APO-USP47	748	759	LISKAIHLPAET	1291.75	4.9145	600	3.408	0
APO-USP47	748	759	LISKAIHLPAET	1291.75	4.9239	3600	4.007	0.154
APO-USP47	748	760	LISKAIHLPAETM	1422.79	5.4797	0	0	0
APO-USP47	748	760	LISKAIHLPAETM	1422.79	5.4943	30	3.051	0.034
APO-USP47	748	760	LISKAIHLPAETM	1422.79	5.4692	600	4.194	0
APO-USP47	748	760	LISKAIHLPAETM	1422.79	5.5075	3600	4.688	0.142
APO-USP47	748	761	LISKAIHLPAETMR	1578.89	4.9131	0	0	0
APO-USP47	748	761	LISKAIHLPAETMR	1578.89	4.9495	30	3.057	0.087
APO-USP47	748	761	LISKAIHLPAETMR	1578.89	4.9633	600	4.427	0
APO-USP47	748	761	LISKAIHLPAETMR	1578.89	4.945	3600	4.658	0.031
APO-USP47	749	759	ISKAIHLPAET	1178.67	4.4782	0	0	0
APO-USP47	749	759	ISKAIHLPAET	1178.67	4.4879	30	2.474	0.143
APO-USP47	749	759	ISKAIHLPAET	1178.67	4.5084	600	3.501	0
APO-USP47	749	759	ISKAIHLPAET	1178.67	4.4824	3600	4.163	0.303
APO-USP47	749	760	ISKAIHLPAETM	1309.71	5.1269	0	0	0
APO-USP47	749	760	ISKAIHLPAETM	1309.71	5.1703	30	3.103	0.058
APO-USP47	749	760	ISKAIHLPAETM	1309.71	5.1475	600	4.139	0
APO-USP47	749	760	ISKAIHLPAETM	1309.71	5.1447	3600	4.598	0.163
APO-USP47	752	760	AIHLPAETM	981.495	5.5546	0	0	0
APO-USP47	752	760	AIHLPAETM	981.495	5.5598	30	2.862	0.05
APO-USP47	752	760	AIHLPAETM	981.495	5.5557	600	3.441	0
APO-USP47	752	760	AIHLPAETM	981.495	5.5563	3600	3.614	0.072
APO-USP47	752	761	AIHLPAETMR	1137.6	4.8725	0	0	0
APO-USP47	752	761	AIHLPAETMR	1137.6	4.8252	30	2.917	0.087
APO-USP47	752	761	AIHLPAETMR	1137.6	4.839	600	3.315	0
APO-USP47	752	761	AIHLPAETMR	1137.6	4.8518	3600	3.504	0.051
APO-USP47	753	760	IHLPAETM	910.458	5.3314	0	0	0
APO-USP47	753	760	IHLPAETM	910.458	5.3334	30	2.511	0.038
APO-USP47	753	760	IHLPAETM	910.458	5.3294	600	2.916	0
APO-USP47	753	760	IHLPAETM	910.458	5.3444	3600	3.114	0.059
APO-USP47	760	764	MRIVL	630.389	6.1029	0	0	0
APO-USP47	760	764	MRIVL	630.389	6.1101	30	0.031	0.006
APO-USP47	760	764	MRIVL	630.389	6.1393	600	0.213	0
APO-USP47	760	764	MRIVL	630.389	6.1111	3600	0.579	0.054
APO-USP47	761	764	RIVL	499.348	5.0799	0	0	0
APO-USP47	761	764	RIVL	499.348	5.0904	30	0.023	0.004
APO-USP47	761	764	RIVL	499.348	5.0942	600	0.03	0
APO-USP47	761	764	RIVL	499.348	5.0804	3600	0.03	0.005
APO-USP47	762	766	IVLER	628.391	3.9006	0	0	0
APO-USP47	762	766	IVLER	628.391	3.871	30	0.332	0.035
APO-USP47	762	766	IVLER	628.391	3.8627	600	0.944	0
APO-USP47	762	766	IVLER	628.391	3.8821	3600	1.267	0.059
APO-USP47	765	770	ERCYND	798.297	2.7038	0	0	0
APO-USP47	765	770	ERCYND	798.297	2.7071	30	1.964	0.017
APO-USP47	765	770	ERCYND	798.297	2.6999	600	2.165	0
APO-USP47	765	770	ERCYND	798.297	2.7082	3600	2.032	0.032
APO-USP47	768	773	YNDLRL	792.413	5.5615	0	0	0
APO-USP47	768	773	YNDLRL	792.413	5.5953	30	0.763	0.026
APO-USP47	768	773	YNDLRL	792.413	5.5868	600	1.501	0
APO-USP47	768	773	YNDLRL	792.413	5.5741	3600	1.485	0.038
APO-USP47	774	779	LSVSSK	619.354	2.7977	0	0	0
APO-USP47	774	779	LSVSSK	619.354	2.8003	30	2.474	0.017
APO-USP47	774	779	LSVSSK	619.354	2.8086	600	2.597	0
APO-USP47	774	779	LSVSSK	619.354	2.807	3600	2.53	0.039
APO-USP47	774	785	LSVSSKTLKAEG	1218.68	3.8932	0	0	0
APO-USP47	774	785	LSVSSKTLKAEG	1218.68	3.8998	30	2.823	0.039
APO-USP47	774	785	LSVSSKTLKAEG	1218.68	3.9071	600	4.33	0
APO-USP47	774	785	LSVSSKTLKAEG	1218.68	3.9132	3600	5.176	0.265
APO-USP47	774	786	LSVSSKTLKAEGF	1365.75	5.3965	0	0	0
APO-USP47	774	786	LSVSSKTLKAEGF	1365.75	5.3612	30	2.17	0.005
APO-USP47	774	786	LSVSSKTLKAEGF	1365.75	5.3738	600	3.477	0
APO-USP47	774	786	LSVSSKTLKAEGF	1365.75	5.391	3600	4.814	0.349
APO-USP47	774	793	LSVSSKTLKAEGFFRSNKVF	2244.23	5.8766	0	0	0
APO-USP47	774	793	LSVSSKTLKAEGFFRSNKVF	2244.23	5.9747	30	1.309	0.107
APO-USP47	774	793	LSVSSKTLKAEGFFRSNKVF	2244.23	5.9973	600	2.6	0
APO-USP47	774	793	LSVSSKTLKAEGFFRSNKVF	2244.23	5.979	3600	4.203	0.338
APO-USP47	780	785	TLKAEG	617.338	2.3972	0	0	0
APO-USP47	780	785	TLKAEG	617.338	2.3997	30	0.73	0.079
APO-USP47	780	785	TLKAEG	617.338	2.4114	600	1.975	0
APO-USP47	780	785	TLKAEG	617.338	2.382	3600	2.519	0.103
APO-USP47	780	786	TLKAEGF	764.407	4.9287	0	0	0
APO-USP47	780	786	TLKAEGF	764.407	4.9529	30	0.749	0.051
APO-USP47	780	786	TLKAEGF	764.407	4.9389	600	1.986	0
APO-USP47	780	786	TLKAEGF	764.407	4.9361	3600	2.731	0.161
APO-USP47	780	787	TLKAEGFF	911.475	6.5464	0	0	0
APO-USP47	780	787	TLKAEGFF	911.475	6.6548	30	0.964	0.072
APO-USP47	780	787	TLKAEGFF	911.475	6.5964	600	2.226	0
APO-USP47	780	787	TLKAEGFF	911.475	6.5316	3600	2.735	0.11
APO-USP47	780	788	TLKAEGFFR	1067.58	5.503	0	0	0
APO-USP47	780	788	TLKAEGFFR	1067.58	5.4266	30	1.195	0.077
APO-USP47	780	788	TLKAEGFFR	1067.58	5.3471	600	2.173	0
APO-USP47	780	788	TLKAEGFFR	1067.58	5.3378	3600	2.256	0.027
APO-USP47	780	792	TLKAEGFFRSNKV	1495.81	5.145	0	0	0
APO-USP47	780	792	TLKAEGFFRSNKV	1495.81	5.1493	30	2.825	0.094
APO-USP47	780	792	TLKAEGFFRSNKV	1495.81	5.1785	600	3.544	0
APO-USP47	780	792	TLKAEGFFRSNKV	1495.81	5.1647	3600	4.042	0.312
APO-USP47	780	793	TLKAEGFFRSNKVF	1642.88	5.9454	0	0	0
APO-USP47	780	793	TLKAEGFFRSNKVF	1642.88	5.9636	30	2.852	0.151
APO-USP47	780	793	TLKAEGFFRSNKVF	1642.88	5.9529	600	3.784	0
APO-USP47	780	793	TLKAEGFFRSNKVF	1642.88	5.9402	3600	4.223	0.004
APO-USP47	790	800	NKVFVESSETL	1251.63	5.236	0	0	0
APO-USP47	790	800	NKVFVESSETL	1251.63	5.2236	30	2.455	0.095
APO-USP47	790	800	NKVFVESSETL	1251.63	5.2318	600	2.873	0
APO-USP47	790	800	NKVFVESSETL	1251.63	5.2434	3600	3.148	0.142
APO-USP47	790	801	NKVFVESSETLD	1366.66	4.935	0	0	0
APO-USP47	790	801	NKVFVESSETLD	1366.66	4.954	30	3.344	0.109
APO-USP47	790	801	NKVFVESSETLD	1366.66	4.9655	600	3.722	0
APO-USP47	790	801	NKVFVESSETLD	1366.66	4.9838	3600	3.67	0.087
APO-USP47	792	801	VFVESSETLD	1124.52	5.1927	0	0	0
APO-USP47	792	801	VFVESSETLD	1124.52	5.1981	30	3.013	0.025
APO-USP47	792	801	VFVESSETLD	1124.52	5.1719	600	3.415	0
APO-USP47	792	801	VFVESSETLD	1124.52	5.1846	3600	3.612	0.125
APO-USP47	794	800	VESSETL	763.36	4.1805	0	0	0
APO-USP47	794	800	VESSETL	763.36	4.1772	30	2.619	0.035
APO-USP47	794	800	VESSETL	763.36	4.1711	600	3.057	0
APO-USP47	794	800	VESSETL	763.36	4.1584	3600	3.107	0.09
APO-USP47	794	801	VESSETLD	878.387	3.6938	0	0	0
APO-USP47	794	801	VESSETLD	878.387	3.709	30	3.077	0.022
APO-USP47	794	801	VESSETLD	878.387	3.7384	600	3.516	0
APO-USP47	794	801	VESSETLD	878.387	3.7423	3600	3.524	0.104
APO-USP47	797	801	SETLD	563.244	3.2301	0	0	0
APO-USP47	797	801	SETLD	563.244	3.2341	30	1.778	0.011
APO-USP47	797	801	SETLD	563.244	3.2391	600	1.857	0
APO-USP47	797	801	SETLD	563.244	3.2363	3600	1.8	0.039
APO-USP47	812	821	WKLLDRHANT	1252.67	4.6759	0	0	0
APO-USP47	812	821	WKLLDRHANT	1252.67	4.681	30	0.567	0.001
APO-USP47	812	821	WKLLDRHANT	1252.67	4.6881	600	1.135	0
APO-USP47	812	821	WKLLDRHANT	1252.67	4.682	3600	1.536	0.053
APO-USP47	812	824	WKLLDRHANTIRL	1634.94	5.5519	0	0	0
APO-USP47	812	824	WKLLDRHANTIRL	1634.94	5.5953	30	0.445	0.071
APO-USP47	812	824	WKLLDRHANTIRL	1634.94	5.5158	600	0.833	0
APO-USP47	812	824	WKLLDRHANTIRL	1634.94	5.5641	3600	1.076	0.025
APO-USP47	815	821	LDRHANT	825.409	1.8883	0	0	0
APO-USP47	815	821	LDRHANT	825.409	1.8871	30	0.685	0.002
APO-USP47	815	821	LDRHANT	825.409	1.8877	600	1.473	0
APO-USP47	815	821	LDRHANT	825.409	1.8749	3600	1.846	0.087
APO-USP47	825	829	FVLLP	587.368	7.3449	0	0	0
APO-USP47	825	829	FVLLP	587.368	7.3505	30	0.03	0
APO-USP47	825	829	FVLLP	587.368	7.3354	600	0.041	0
APO-USP47	825	829	FVLLP	587.368	7.3637	3600	0.123	0.012
APO-USP47	825	831	FVLLPEQ	844.469	6.4528	0	0	0
APO-USP47	825	831	FVLLPEQ	844.469	6.4551	30	1.309	0.007
APO-USP47	825	831	FVLLPEQ	844.469	6.4389	600	1.391	0
APO-USP47	825	831	FVLLPEQ	844.469	6.4395	3600	1.413	0.041
APO-USP47	836	856	YSKRTAYQKAGGDSGNVDDDC	2248.97	3.3528	0	0	0
APO-USP47	836	856	YSKRTAYQKAGGDSGNVDDDC	2248.97	3.3451	30	9.028	0.051
APO-USP47	836	856	YSKRTAYQKAGGDSGNVDDDC	2248.97	3.3257	600	9.677	0
APO-USP47	836	856	YSKRTAYQKAGGDSGNVDDDC	2248.97	3.3173	3600	9.449	0.021
APO-USP47	836	857	YSKRTAYQKAGGDSGNVDDDCE	2378.01	3.3761	0	0	0
APO-USP47	836	857	YSKRTAYQKAGGDSGNVDDDCE	2378.01	3.3861	30	9.174	0.115
APO-USP47	836	857	YSKRTAYQKAGGDSGNVDDDCE	2378.01	3.359	600	9.812	0
APO-USP47	836	857	YSKRTAYQKAGGDSGNVDDDCE	2378.01	3.3495	3600	9.472	0.068
APO-USP47	837	856	SKRTAYQKAGGDSGNVDDDC	2085.9	3.1846	0	0	0
APO-USP47	837	856	SKRTAYQKAGGDSGNVDDDC	2085.9	3.1542	30	8.424	0.004
APO-USP47	837	856	SKRTAYQKAGGDSGNVDDDC	2085.9	3.1593	600	9.044	0
APO-USP47	837	856	SKRTAYQKAGGDSGNVDDDC	2085.9	3.1709	3600	8.554	0.021
APO-USP47	837	857	SKRTAYQKAGGDSGNVDDDCE	2214.94	3.2214	0	0	0
APO-USP47	837	857	SKRTAYQKAGGDSGNVDDDCE	2214.94	3.1709	30	8.781	0.099
APO-USP47	837	857	SKRTAYQKAGGDSGNVDDDCE	2214.94	3.1925	600	9.233	0
APO-USP47	837	857	SKRTAYQKAGGDSGNVDDDCE	2214.94	3.2219	3600	8.859	0.075
APO-USP47	840	853	TAYQKAGGDSGNVD	1381.61	2.9128	0	0	0
APO-USP47	840	853	TAYQKAGGDSGNVD	1381.61	2.8935	30	6.433	0.061
APO-USP47	840	853	TAYQKAGGDSGNVD	1381.61	2.8952	600	6.746	0
APO-USP47	840	853	TAYQKAGGDSGNVD	1381.61	2.9101	3600	6.622	0.027
APO-USP47	840	855	TAYQKAGGDSGNVDDD	1611.66	3.0733	0	0	0
APO-USP47	840	855	TAYQKAGGDSGNVDDD	1611.66	3.0644	30	6.678	0.008
APO-USP47	840	855	TAYQKAGGDSGNVDDD	1611.66	3.1038	600	6.831	0
APO-USP47	840	855	TAYQKAGGDSGNVDDD	1611.66	3.0821	3600	6.671	0.078
APO-USP47	840	856	TAYQKAGGDSGNVDDDC	1714.67	3.6665	0	0	0
APO-USP47	840	856	TAYQKAGGDSGNVDDDC	1714.67	3.6724	30	6.759	0.004
APO-USP47	840	856	TAYQKAGGDSGNVDDDC	1714.67	3.6763	600	7.231	0
APO-USP47	840	856	TAYQKAGGDSGNVDDDC	1714.67	3.6713	3600	6.95	0.089
APO-USP47	840	857	TAYQKAGGDSGNVDDDCE	1843.72	3.679	0	0	0
APO-USP47	840	857	TAYQKAGGDSGNVDDDCE	1843.72	3.679	30	7.224	0.013
APO-USP47	840	857	TAYQKAGGDSGNVDDDCE	1843.72	3.6785	600	7.757	0
APO-USP47	840	857	TAYQKAGGDSGNVDDDCE	1843.72	3.6491	3600	7.494	0.139
APO-USP47	842	857	YQKAGGDSGNVDDDCE	1671.63	3.4357	0	0	0
APO-USP47	842	857	YQKAGGDSGNVDDDCE	1671.63	3.4305	30	5.53	0.01
APO-USP47	842	857	YQKAGGDSGNVDDDCE	1671.63	3.4788	600	5.831	0
APO-USP47	842	857	YQKAGGDSGNVDDDCE	1671.63	3.4427	3600	5.697	0.009
APO-USP47	857	866	ERVKGPVGSL	1040.6	4.5126	0	0	0
APO-USP47	857	866	ERVKGPVGSL	1040.6	4.5145	30	4.581	0.071
APO-USP47	857	866	ERVKGPVGSL	1040.6	4.5439	600	4.673	0
APO-USP47	857	866	ERVKGPVGSL	1040.6	4.5167	3600	4.554	0.028
APO-USP47	857	867	ERVKGPVGSLK	1168.69	3.3173	0	0	0
APO-USP47	857	867	ERVKGPVGSLK	1168.69	3.3218	30	5.17	0.08
APO-USP47	857	867	ERVKGPVGSLK	1168.69	3.3101	600	5.282	0
APO-USP47	857	867	ERVKGPVGSLK	1168.69	3.2983	3600	5.475	0
APO-USP47	857	870	ERVKGPVGSLKSVE	1483.84	4.0984	0	0	0
APO-USP47	857	870	ERVKGPVGSLKSVE	1483.84	4.1162	30	7.066	0.062
APO-USP47	857	870	ERVKGPVGSLKSVE	1483.84	4.0757	600	7.358	0
APO-USP47	857	870	ERVKGPVGSLKSVE	1483.84	4.0674	3600	7.182	0.169
APO-USP47	857	871	ERVKGPVGSLKSVEA	1554.87	4.1906	0	0	0
APO-USP47	857	871	ERVKGPVGSLKSVEA	1554.87	4.1639	30	7.993	0.008
APO-USP47	857	871	ERVKGPVGSLKSVEA	1554.87	4.1623	600	8.15	0
APO-USP47	857	871	ERVKGPVGSLKSVEA	1554.87	4.1506	3600	8.055	0.174
APO-USP47	858	870	RVKGPVGSLKSVE	1354.79	3.9009	0	0	0
APO-USP47	858	870	RVKGPVGSLKSVE	1354.79	3.9331	30	6.455	0.024
APO-USP47	858	870	RVKGPVGSLKSVE	1354.79	3.9159	600	6.689	0
APO-USP47	858	870	RVKGPVGSLKSVE	1354.79	3.9132	3600	6.56	0.096
APO-USP47	858	871	RVKGPVGSLKSVEA	1425.83	4.0405	0	0	0
APO-USP47	858	871	RVKGPVGSLKSVEA	1425.83	4.0308	30	7.098	0.042
APO-USP47	858	871	RVKGPVGSLKSVEA	1425.83	4.0269	600	7.345	0
APO-USP47	858	871	RVKGPVGSLKSVEA	1425.83	4.0996	3600	7.033	0.17
APO-USP47	858	873	RVKGPVGSLKSVEAIL	1652	6.1155	0	0	0
APO-USP47	858	873	RVKGPVGSLKSVEAIL	1652	6.0713	30	8.749	0.092
APO-USP47	858	873	RVKGPVGSLKSVEAIL	1652	6.0794	600	8.935	0
APO-USP47	858	873	RVKGPVGSLKSVEAIL	1652	6.12	3600	8.717	0.178
APO-USP47	872	883	ILEESTEKLKSL	1388.78	5.124	0	0	0
APO-USP47	872	883	ILEESTEKLKSL	1388.78	5.137	30	5.61	0.03
APO-USP47	872	883	ILEESTEKLKSL	1388.78	5.1807	600	5.606	0
APO-USP47	872	883	ILEESTEKLKSL	1388.78	5.1602	3600	5.56	0.207
APO-USP47	872	904	ILEESTEKLKSLSLQQQQDGDNGDSSKSTETSD	3596.68	4.8891	0	0	0
APO-USP47	872	904	ILEESTEKLKSLSLQQQQDGDNGDSSKSTETSD	3596.68	4.9074	30	16.394	0.158
APO-USP47	872	904	ILEESTEKLKSLSLQQQQDGDNGDSSKSTETSD	3596.68	4.8834	600	17.47	0
APO-USP47	872	904	ILEESTEKLKSLSLQQQQDGDNGDSSKSTETSD	3596.68	4.8917	3600	16.896	0.229
APO-USP47	872	905	ILEESTEKLKSLSLQQQQDGDNGDSSKSTETSDF	3743.75	5.3403	0	0	0
APO-USP47	872	905	ILEESTEKLKSLSLQQQQDGDNGDSSKSTETSDF	3743.75	5.3501	30	16.634	0.031
APO-USP47	872	905	ILEESTEKLKSLSLQQQQDGDNGDSSKSTETSDF	3743.75	5.356	600	17.56	0
APO-USP47	872	905	ILEESTEKLKSLSLQQQQDGDNGDSSKSTETSDF	3743.75	5.3355	3600	17.023	0.093
APO-USP47	874	880	EESTEKL	834.397	3.5466	0	0	0
APO-USP47	874	880	EESTEKL	834.397	3.5814	30	3.055	0.016
APO-USP47	874	880	EESTEKL	834.397	3.5387	600	3.258	0
APO-USP47	874	880	EESTEKL	834.397	3.5536	3600	3.063	0
APO-USP47	874	883	EESTEKLKSL	1162.61	4.1909	0	0	0
APO-USP47	874	883	EESTEKLKSL	1162.61	4.1673	30	4.627	0.081
APO-USP47	874	883	EESTEKLKSL	1162.61	4.1778	600	4.83	0
APO-USP47	874	883	EESTEKLKSL	1162.61	4.2083	3600	4.643	0.104
APO-USP47	874	885	EESTEKLKSLSL	1362.72	5.2657	0	0	0
APO-USP47	874	885	EESTEKLKSLSL	1362.72	5.2391	30	6.236	0.068
APO-USP47	874	885	EESTEKLKSLSL	1362.72	5.2895	600	5.992	0
APO-USP47	874	885	EESTEKLKSLSL	1362.72	5.2867	3600	6.412	0.085
APO-USP47	874	904	EESTEKLKSLSLQQQQDGDNGDSSKSTETSD	3370.51	4.2153	0	0	0
APO-USP47	874	904	EESTEKLKSLSLQQQQDGDNGDSSKSTETSD	3370.51	4.3137	30	15.23	0.123
APO-USP47	874	904	EESTEKLKSLSLQQQQDGDNGDSSKSTETSD	3370.51	4.2266	600	16.103	0
APO-USP47	874	904	EESTEKLKSLSLQQQQDGDNGDSSKSTETSD	3370.51	4.2383	3600	15.659	0.207
APO-USP47	874	905	EESTEKLKSLSLQQQQDGDNGDSSKSTETSDF	3517.58	4.9272	0	0	0
APO-USP47	874	905	EESTEKLKSLSLQQQQDGDNGDSSKSTETSDF	3517.58	4.924	30	15.457	0.152
APO-USP47	874	905	EESTEKLKSLSLQQQQDGDNGDSSKSTETSDF	3517.58	4.9722	600	16.314	0
APO-USP47	874	905	EESTEKLKSLSLQQQQDGDNGDSSKSTETSDF	3517.58	4.9472	3600	15.752	0.247
APO-USP47	875	904	ESTEKLKSLSLQQQQDGDNGDSSKSTETSD	3241.47	4.0544	0	0	0
APO-USP47	875	904	ESTEKLKSLSLQQQQDGDNGDSSKSTETSD	3241.47	4.0119	30	14.888	0.077
APO-USP47	875	904	ESTEKLKSLSLQQQQDGDNGDSSKSTETSD	3241.47	4.0269	600	15.461	0
APO-USP47	875	904	ESTEKLKSLSLQQQQDGDNGDSSKSTETSD	3241.47	4.0818	3600	14.984	0.219
APO-USP47	877	904	TEKLKSLSLQQQQDGDNGDSSKSTETSD	3025.4	3.9494	0	0	0
APO-USP47	877	904	TEKLKSLSLQQQQDGDNGDSSKSTETSD	3025.4	3.9642	30	13.176	0.003
APO-USP47	877	904	TEKLKSLSLQQQQDGDNGDSSKSTETSD	3025.4	4.0447	600	13.89	0
APO-USP47	877	904	TEKLKSLSLQQQQDGDNGDSSKSTETSD	3025.4	3.9631	3600	13.487	0.27
APO-USP47	877	905	TEKLKSLSLQQQQDGDNGDSSKSTETSDF	3172.46	4.7919	0	0	0
APO-USP47	877	905	TEKLKSLSLQQQQDGDNGDSSKSTETSDF	3172.46	4.8064	30	13.186	0.007
APO-USP47	877	905	TEKLKSLSLQQQQDGDNGDSSKSTETSDF	3172.46	4.8102	600	14.1	0
APO-USP47	877	905	TEKLKSLSLQQQQDGDNGDSSKSTETSDF	3172.46	4.8241	3600	13.246	0.273
APO-USP47	881	904	KSLSLQQQQDGDNGDSSKSTETSD	2554.13	3.4068	0	0	0
APO-USP47	881	904	KSLSLQQQQDGDNGDSSKSTETSD	2554.13	3.4128	30	11.451	0.205
APO-USP47	881	904	KSLSLQQQQDGDNGDSSKSTETSD	2554.13	3.4144	600	12.204	0
APO-USP47	881	904	KSLSLQQQQDGDNGDSSKSTETSD	2554.13	3.3783	3600	11.797	0.264
APO-USP47	883	904	LSLQQQQDGDNGDSSKSTETSD	2339	3.6742	0	0	0
APO-USP47	883	904	LSLQQQQDGDNGDSSKSTETSD	2339	3.6857	30	10.663	0.24
APO-USP47	883	904	LSLQQQQDGDNGDSSKSTETSD	2339	3.6696	600	11.153	0
APO-USP47	883	904	LSLQQQQDGDNGDSSKSTETSD	2339	3.6691	3600	10.616	0.303
APO-USP47	884	898	SLQQQQDGDNGDSSK	1605.69	2.4438	0	0	0
APO-USP47	884	898	SLQQQQDGDNGDSSK	1605.69	2.4352	30	6.534	0.116
APO-USP47	884	898	SLQQQQDGDNGDSSK	1605.69	2.4381	600	6.978	0
APO-USP47	884	898	SLQQQQDGDNGDSSK	1605.69	2.443	3600	6.635	0.066
APO-USP47	884	904	SLQQQQDGDNGDSSKSTETSD	2225.92	2.7951	0	0	0
APO-USP47	884	904	SLQQQQDGDNGDSSKSTETSD	2225.92	2.8169	30	9.497	0.04
APO-USP47	884	904	SLQQQQDGDNGDSSKSTETSD	2225.92	2.8064	600	10.14	0
APO-USP47	884	904	SLQQQQDGDNGDSSKSTETSD	2225.92	2.7992	3600	9.736	0.155
APO-USP47	884	905	SLQQQQDGDNGDSSKSTETSDF	2372.98	4.543	0	0	0
APO-USP47	884	905	SLQQQQDGDNGDSSKSTETSDF	2372.98	4.5268	30	9.397	0.043
APO-USP47	884	905	SLQQQQDGDNGDSSKSTETSDF	2372.98	4.5572	600	9.958	0
APO-USP47	884	905	SLQQQQDGDNGDSSKSTETSDF	2372.98	4.5445	3600	9.681	0.136
APO-USP47	886	904	QQQQDGDNGDSSKSTETSD	2025.8	2.1195	0	0	0
APO-USP47	886	904	QQQQDGDNGDSSKSTETSD	2025.8	2.0946	30	8.415	0.128
APO-USP47	886	904	QQQQDGDNGDSSKSTETSD	2025.8	2.1296	600	8.908	0
APO-USP47	886	904	QQQQDGDNGDSSKSTETSD	2025.8	2.1091	3600	8.612	0.159
APO-USP47	886	905	QQQQDGDNGDSSKSTETSDF	2172.87	4.2153	0	0	0
APO-USP47	886	905	QQQQDGDNGDSSKSTETSDF	2172.87	4.1972	30	8.11	0.017
APO-USP47	886	905	QQQQDGDNGDSSKSTETSDF	2172.87	4.2177	600	8.613	0
APO-USP47	886	905	QQQQDGDNGDSSKSTETSDF	2172.87	4.2039	3600	8.338	0.116
APO-USP47	905	924	FENIESPLNERDSSASVDNR	2278.05	5.1413	0	0	0
APO-USP47	905	924	FENIESPLNERDSSASVDNR	2278.05	5.1382	30	9.044	0.009
APO-USP47	905	924	FENIESPLNERDSSASVDNR	2278.05	5.1364	600	9.478	0
APO-USP47	905	924	FENIESPLNERDSSASVDNR	2278.05	5.1292	3600	9.269	0.191
APO-USP47	905	928	FENIESPLNERDSSASVDNRELEQ	2777.27	5.398	0	0	0
APO-USP47	905	928	FENIESPLNERDSSASVDNRELEQ	2777.27	5.4111	30	11.572	0.007
APO-USP47	905	928	FENIESPLNERDSSASVDNRELEQ	2777.27	5.4204	600	12.283	0
APO-USP47	905	928	FENIESPLNERDSSASVDNRELEQ	2777.27	5.4088	3600	11.809	0.01
APO-USP47	905	938	FENIESPLNERDSSASVDNRELEQHIQTSDPENF	3945.79	5.9579	0	0	0
APO-USP47	905	938	FENIESPLNERDSSASVDNRELEQHIQTSDPENF	3945.79	5.9803	30	16.375	0.106
APO-USP47	905	938	FENIESPLNERDSSASVDNRELEQHIQTSDPENF	3945.79	5.9973	600	17.126	0
APO-USP47	905	938	FENIESPLNERDSSASVDNRELEQHIQTSDPENF	3945.79	5.918	3600	16.451	0.207
APO-USP47	906	922	ENIESPLNERDSSASVD	1860.83	4.9069	0	0	0
APO-USP47	906	922	ENIESPLNERDSSASVD	1860.83	4.9063	30	7.983	0.099
APO-USP47	906	922	ENIESPLNERDSSASVD	1860.83	4.9078	600	8.368	0
APO-USP47	906	922	ENIESPLNERDSSASVD	1860.83	4.8851	3600	8.1	0.171
APO-USP47	906	923	ENIESPLNERDSSASVDN	1974.88	4.7737	0	0	0
APO-USP47	906	923	ENIESPLNERDSSASVDN	1974.88	4.7587	30	7.988	0.074
APO-USP47	906	923	ENIESPLNERDSSASVDN	1974.88	4.768	600	8.668	0
APO-USP47	906	923	ENIESPLNERDSSASVDN	1974.88	4.7486	3600	8.35	0.101
APO-USP47	906	924	ENIESPLNERDSSASVDNR	2130.98	4.5322	0	0	0
APO-USP47	906	924	ENIESPLNERDSSASVDNR	2130.98	4.539	30	8.732	0.097
APO-USP47	906	924	ENIESPLNERDSSASVDNR	2130.98	4.5972	600	9.057	0
APO-USP47	906	924	ENIESPLNERDSSASVDNR	2130.98	4.5201	3600	8.887	0.139
APO-USP47	906	925	ENIESPLNERDSSASVDNRE	2260.02	4.5888	0	0	0
APO-USP47	906	925	ENIESPLNERDSSASVDNRE	2260.02	4.6333	30	9.154	0.039
APO-USP47	906	925	ENIESPLNERDSSASVDNRE	2260.02	4.5994	600	9.502	0
APO-USP47	906	925	ENIESPLNERDSSASVDNRE	2260.02	4.6299	3600	9.228	0.096
APO-USP47	906	938	ENIESPLNERDSSASVDNRELEQHIQTSDPENF	3798.72	5.7286	0	0	0
APO-USP47	906	938	ENIESPLNERDSSASVDNRELEQHIQTSDPENF	3798.72	5.7417	30	15.992	0.01
APO-USP47	906	938	ENIESPLNERDSSASVDNRELEQHIQTSDPENF	3798.72	5.7222	600	16.827	0
APO-USP47	906	938	ENIESPLNERDSSASVDNRELEQHIQTSDPENF	3798.72	5.7339	3600	16.35	0.093
APO-USP47	908	923	IESPLNERDSSASVDN	1731.79	4.5052	0	0	0
APO-USP47	908	923	IESPLNERDSSASVDN	1731.79	4.539	30	7.144	0.041
APO-USP47	908	923	IESPLNERDSSASVDN	1731.79	4.5128	600	7.464	0
APO-USP47	908	923	IESPLNERDSSASVDN	1731.79	4.509	3600	7.148	0.054
APO-USP47	913	924	NERDSSASVDNR	1348.6	2.2999	0	0	0
APO-USP47	913	924	NERDSSASVDNR	1348.6	2.3054	30	5.237	0.002
APO-USP47	913	924	NERDSSASVDNR	1348.6	2.3826	600	5.327	0
APO-USP47	913	924	NERDSSASVDNR	1348.6	2.2966	3600	5.418	0.045
APO-USP47	916	924	DSSASVDNR	949.41	2.2611	0	0	0
APO-USP47	916	924	DSSASVDNR	949.41	2.2843	30	4.15	0.062
APO-USP47	916	924	DSSASVDNR	949.41	2.3116	600	4.324	0
APO-USP47	916	924	DSSASVDNR	949.41	2.27	3600	4.228	0.052
APO-USP47	923	938	NRELEQHIQTSDPENF	1955.9	4.9742	0	0	0
APO-USP47	923	938	NRELEQHIQTSDPENF	1955.9	4.9584	30	6.913	0.048
APO-USP47	923	938	NRELEQHIQTSDPENF	1955.9	4.9833	600	7.34	0
APO-USP47	923	938	NRELEQHIQTSDPENF	1955.9	4.9727	3600	6.764	0.024
APO-USP47	925	931	ELEQHIQ	895.44	3.5228	0	0	0
APO-USP47	925	931	ELEQHIQ	895.44	3.527	30	2.406	0.027
APO-USP47	925	931	ELEQHIQ	895.44	3.5254	600	2.536	0
APO-USP47	925	931	ELEQHIQ	895.44	3.5093	3600	2.501	0.066
APO-USP47	925	938	ELEQHIQTSDPENF	1685.75	5.2449	0	0	0
APO-USP47	925	938	ELEQHIQTSDPENF	1685.75	5.2436	30	5.554	0.022
APO-USP47	925	938	ELEQHIQTSDPENF	1685.75	5.2273	600	5.883	0
APO-USP47	925	938	ELEQHIQTSDPENF	1685.75	5.2235	3600	5.697	0.011
APO-USP47	927	938	EQHIQTSDPENF	1443.63	4.8085	0	0	0
APO-USP47	927	938	EQHIQTSDPENF	1443.63	4.8275	30	4.434	0.026
APO-USP47	927	938	EQHIQTSDPENF	1443.63	4.839	600	4.591	0
APO-USP47	927	938	EQHIQTSDPENF	1443.63	4.8285	3600	4.544	0.057
APO-USP47	939	962	QSEERSDSDVNNDRSTSSVDSDIL	2654.15	5.094	0	0	0
APO-USP47	939	962	QSEERSDSDVNNDRSTSSVDSDIL	2654.15	5.0893	30	9.758	0.027
APO-USP47	939	962	QSEERSDSDVNNDRSTSSVDSDIL	2654.15	5.0831	600	10.455	0
APO-USP47	939	962	QSEERSDSDVNNDRSTSSVDSDIL	2654.15	5.087	3600	10.088	0.08
APO-USP47	963	972	SSSHSSDTLC	1022.4	3.5836	0	0	0
APO-USP47	963	972	SSSHSSDTLC	1022.4	3.567	30	2.539	0.004
APO-USP47	963	972	SSSHSSDTLC	1022.4	3.6008	600	2.804	0
APO-USP47	963	972	SSSHSSDTLC	1022.4	3.6335	3600	2.51	0.015
APO-USP47	977	994	AQIPLANGLDSHSITSSR	1865.96	5.199	0	0	0
APO-USP47	977	994	AQIPLANGLDSHSITSSR	1865.96	5.1959	30	7.43	0.092
APO-USP47	977	994	AQIPLANGLDSHSITSSR	1865.96	5.2207	600	8.097	0
APO-USP47	977	994	AQIPLANGLDSHSITSSR	1865.96	5.2102	3600	7.521	0.14
APO-USP47	1031	1033	YMY	475.178	5.1081	0	0	0
APO-USP47	1031	1033	YMY	475.178	5.1104	30	0.643	0.027
APO-USP47	1031	1033	YMY	475.178	5.143	600	0.701	0
APO-USP47	1031	1033	YMY	475.178	5.1347	3600	0.666	0.029
APO-USP47	1052	1057	LMVHVD	712.358	4.5726	0	0	0
APO-USP47	1052	1057	LMVHVD	712.358	4.5756	30	0.105	0.016
APO-USP47	1052	1057	LMVHVD	712.358	4.5839	600	0.095	0
APO-USP47	1052	1057	LMVHVD	712.358	4.59	3600	0.095	0.018
APO-USP47	1052	1062	LMVHVDKRITL	1323.77	5.2594	0	0	0
APO-USP47	1052	1062	LMVHVDKRITL	1323.77	5.3778	30	0.259	0.004
APO-USP47	1052	1062	LMVHVDKRITL	1323.77	5.2651	600	0.332	0
APO-USP47	1052	1062	LMVHVDKRITL	1323.77	5.2745	3600	0.634	0.085
APO-USP47	1055	1062	HVDKRITL	980.577	4.0126	0	0	0
APO-USP47	1055	1062	HVDKRITL	980.577	4.023	30	0.093	0.005
APO-USP47	1055	1062	HVDKRITL	980.577	4.0291	600	0.401	0
APO-USP47	1055	1062	HVDKRITL	980.577	4.0252	3600	0.631	0.064
APO-USP47	1056	1062	VDKRITL	843.518	4.4528	0	0	0
APO-USP47	1056	1062	VDKRITL	843.518	4.4702	30	0.134	0.003
APO-USP47	1056	1062	VDKRITL	843.518	4.4374	600	0.256	0
APO-USP47	1056	1062	VDKRITL	843.518	4.4679	3600	0.589	0.055
APO-USP47	1063	1076	AAFKQHLEPFVGVL	1554.86	6.8334	0	0	0
APO-USP47	1063	1076	AAFKQHLEPFVGVL	1554.86	6.7358	30	0.565	0.01
APO-USP47	1063	1076	AAFKQHLEPFVGVL	1554.86	6.7917	600	1.683	0
APO-USP47	1063	1076	AAFKQHLEPFVGVL	1554.86	6.7901	3600	2.047	0.085
APO-USP47	1065	1076	FKQHLEPFVGVL	1412.78	6.6895	0	0	0
APO-USP47	1065	1076	FKQHLEPFVGVL	1412.78	6.646	30	0.609	0.179
APO-USP47	1065	1076	FKQHLEPFVGVL	1412.78	6.7118	600	1.609	0
APO-USP47	1065	1076	FKQHLEPFVGVL	1412.78	6.7124	3600	1.948	0.064
APO-USP47	1066	1076	KQHLEPFVGVL	1265.71	6.4654	0	0	0
APO-USP47	1066	1076	KQHLEPFVGVL	1265.71	6.4052	30	0.436	0.008
APO-USP47	1066	1076	KQHLEPFVGVL	1265.71	6.5543	600	1.39	0
APO-USP47	1066	1076	KQHLEPFVGVL	1265.71	6.5127	3600	1.727	0.061
APO-USP47	1068	1076	HLEPFVGVL	1009.56	7.0712	0	0	0
APO-USP47	1068	1076	HLEPFVGVL	1009.56	7.0709	30	0.324	0.024
APO-USP47	1068	1076	HLEPFVGVL	1009.56	7.078	600	1.294	0
APO-USP47	1068	1076	HLEPFVGVL	1009.56	7.0741	3600	1.646	0.087
APO-USP47	1069	1076	LEPFVGVL	872.501	7.7373	0	0	0
APO-USP47	1069	1076	LEPFVGVL	872.501	7.7832	30	0.336	0.017
APO-USP47	1069	1076	LEPFVGVL	872.501	7.7504	600	1.299	0
APO-USP47	1069	1076	LEPFVGVL	872.501	7.7954	3600	1.622	0.064
APO-USP47	1073	1081	VGVLSSHFK	972.539	4.4046	0	0	0
APO-USP47	1073	1081	VGVLSSHFK	972.539	4.1273	30	1.56	0.049
APO-USP47	1073	1081	VGVLSSHFK	972.539	4.1334	600	2.257	0
APO-USP47	1073	1081	VGVLSSHFK	972.539	4.1262	3600	2.498	0.087
APO-USP47	1075	1086	VLSSHFKVFRVY	1480.82	5.7416	0	0	0
APO-USP47	1075	1086	VLSSHFKVFRVY	1480.82	5.7906	30	1.047	0.034
APO-USP47	1075	1086	VLSSHFKVFRVY	1480.82	5.6933	600	3.172	0
APO-USP47	1075	1086	VLSSHFKVFRVY	1480.82	5.7838	3600	3.726	0.119
APO-USP47	1077	1086	SSHFKVFRVY	1268.67	5.3324	0	0	0
APO-USP47	1077	1086	SSHFKVFRVY	1268.67	5.3323	30	0.984	0.06
APO-USP47	1077	1086	SSHFKVFRVY	1268.67	5.3294	600	2.731	0
APO-USP47	1077	1086	SSHFKVFRVY	1268.67	5.3267	3600	3.277	0.14
APO-USP47	1080	1086	FKVFRVY	957.544	5.7771	0	0	0
APO-USP47	1080	1086	FKVFRVY	957.544	5.8005	30	0.986	0.016
APO-USP47	1080	1086	FKVFRVY	957.544	5.8021	600	2.569	0
APO-USP47	1080	1086	FKVFRVY	957.544	5.7538	3600	2.878	0.01
APO-USP47	1084	1086	RVY	436.243	2.8536	0	0	0
APO-USP47	1084	1086	RVY	436.243	2.838	30	0.29	0.016
APO-USP47	1084	1086	RVY	436.243	2.8441	600	0.646	0
APO-USP47	1084	1086	RVY	436.243	2.8425	3600	0.671	0.02
APO-USP47	1084	1093	RVYASNQEFE	1241.57	4.4106	0	0	0
APO-USP47	1084	1093	RVYASNQEFE	1241.57	4.408	30	4.363	0.037
APO-USP47	1084	1093	RVYASNQEFE	1241.57	4.4463	600	5.365	0
APO-USP47	1084	1093	RVYASNQEFE	1241.57	4.3847	3600	5.022	0.005
APO-USP47	1087	1092	ASNQEF	694.292	4.4291	0	0	0
APO-USP47	1087	1092	ASNQEF	694.292	4.4502	30	1.969	0.003
APO-USP47	1087	1092	ASNQEF	694.292	4.393	600	2.596	0
APO-USP47	1087	1092	ASNQEF	694.292	4.4147	3600	2.497	0.059
APO-USP47	1087	1097	ASNQEFESVRL	1278.62	5.9025	0	0	0
APO-USP47	1087	1097	ASNQEFESVRL	1278.62	5.9148	30	5.198	0.081
APO-USP47	1087	1097	ASNQEFESVRL	1278.62	5.8952	600	5.924	0
APO-USP47	1087	1097	ASNQEFESVRL	1278.62	5.8781	3600	5.919	0.162
APO-USP47	1090	1097	QEFESVRL	1006.51	5.8152	0	0	0
APO-USP47	1090	1097	QEFESVRL	1006.51	5.8172	30	3.699	0.024
APO-USP47	1090	1097	QEFESVRL	1006.51	5.8154	600	4.155	0
APO-USP47	1090	1097	QEFESVRL	1006.51	5.8148	3600	4.094	0.11
APO-USP47	1092	1097	FESVRL	749.407	5.4152	0	0	0
APO-USP47	1092	1097	FESVRL	749.407	5.5642	30	2.819	0.04
APO-USP47	1092	1097	FESVRL	749.407	5.5513	600	2.941	0
APO-USP47	1092	1097	FESVRL	749.407	5.5475	3600	2.827	0.062
APO-USP47	1098	1104	NETLSSF	796.36	5.7715	0	0	0
APO-USP47	1098	1104	NETLSSF	796.36	5.7673	30	1.404	0.028
APO-USP47	1098	1104	NETLSSF	796.36	5.7754	600	2.984	0
APO-USP47	1098	1104	NETLSSF	796.36	5.7583	3600	3.271	0.089
APO-USP47	1098	1114	NETLSSFSDDNKITIRL	1951.99	6.4343	0	0	0
APO-USP47	1098	1114	NETLSSFSDDNKITIRL	1951.99	6.433	30	2.932	0.277
APO-USP47	1098	1114	NETLSSFSDDNKITIRL	1951.99	6.4189	600	5.487	0
APO-USP47	1098	1114	NETLSSFSDDNKITIRL	1951.99	6.4761	3600	6.353	0.256
APO-USP47	1102	1109	SSFSDDNK	898.367	2.888	0	0	0
APO-USP47	1102	1109	SSFSDDNK	898.367	2.9956	30	1.407	0.058
APO-USP47	1102	1109	SSFSDDNK	898.367	2.944	600	2.781	0
APO-USP47	1102	1109	SSFSDDNK	898.367	2.9445	3600	2.67	0.053
APO-USP47	1102	1113	SSFSDDNKITIR	1381.68	4.6073	0	0	0
APO-USP47	1102	1113	SSFSDDNKITIR	1381.68	4.6089	30	1.304	0.026
APO-USP47	1102	1113	SSFSDDNKITIR	1381.68	4.6194	600	2.586	0
APO-USP47	1102	1113	SSFSDDNKITIR	1381.68	4.6055	3600	3.168	0.099
APO-USP47	1102	1123	SSFSDDNKITIRLGRALKKGEY	2497.33	5.3825	0	0	0
APO-USP47	1102	1123	SSFSDDNKITIRLGRALKKGEY	2497.33	5.3789	30	7.121	0.076
APO-USP47	1102	1123	SSFSDDNKITIRLGRALKKGEY	2497.33	5.4337	600	8.889	0
APO-USP47	1102	1123	SSFSDDNKITIRLGRALKKGEY	2497.33	5.3777	3600	9.661	0.185
APO-USP47	1104	1109	FSDDNK	724.303	2.3946	0	0	0
APO-USP47	1104	1109	FSDDNK	724.303	2.3931	30	0.777	0.039
APO-USP47	1104	1109	FSDDNK	724.303	2.4026	600	1.637	0
APO-USP47	1104	1109	FSDDNK	724.303	2.382	3600	1.578	0.019
APO-USP47	1107	1113	DNKITIR	858.492	3.5156	0	0	0
APO-USP47	1107	1113	DNKITIR	858.492	3.5481	30	0.45	0.036
APO-USP47	1107	1113	DNKITIR	858.492	3.5276	600	0.789	0
APO-USP47	1107	1113	DNKITIR	858.492	3.5459	3600	1.46	0.052
APO-USP47	1107	1114	DNKITIRL	971.576	5.5844	0	0	0
APO-USP47	1107	1114	DNKITIRL	971.576	5.6208	30	1.124	0.033
APO-USP47	1107	1114	DNKITIRL	971.576	5.6023	600	1.606	0
APO-USP47	1107	1114	DNKITIRL	971.576	5.6096	3600	2.336	0.129
APO-USP47	1114	1123	LGRALKKGEY	1133.66	3.2378	0	0	0
APO-USP47	1114	1123	LGRALKKGEY	1133.66	3.2474	30	3.848	0.027
APO-USP47	1114	1123	LGRALKKGEY	1133.66	3.2591	600	4.808	0
APO-USP47	1114	1123	LGRALKKGEY	1133.66	3.2485	3600	4.744	0.142
APO-USP47	1114	1126	LGRALKKGEYRVK	1516.92	2.8891	0	0	0
APO-USP47	1114	1126	LGRALKKGEYRVK	1516.92	3.0078	30	3.622	0.085
APO-USP47	1114	1126	LGRALKKGEYRVK	1516.92	3.0217	600	4.986	0
APO-USP47	1114	1126	LGRALKKGEYRVK	1516.92	2.9124	3600	4.874	0.099
APO-USP47	1114	1127	LGRALKKGEYRVKV	1615.99	3.5811	0	0	0
APO-USP47	1114	1127	LGRALKKGEYRVKV	1615.99	3.6236	30	3.443	0.119
APO-USP47	1114	1127	LGRALKKGEYRVKV	1615.99	3.6718	600	4.544	0
APO-USP47	1114	1127	LGRALKKGEYRVKV	1615.99	3.648	3600	4.492	0.019
APO-USP47	1115	1127	GRALKKGEYRVKV	1502.9	3.1631	0	0	0
APO-USP47	1115	1127	GRALKKGEYRVKV	1502.9	3.1764	30	3.614	0.222
APO-USP47	1115	1127	GRALKKGEYRVKV	1502.9	3.299	600	4.322	0
APO-USP47	1115	1127	GRALKKGEYRVKV	1502.9	3.1686	3600	4.704	0.022
APO-USP47	1115	1131	GRALKKGEYRVKVYQLL	2020.19	5.1961	0	0	0
APO-USP47	1115	1131	GRALKKGEYRVKVYQLL	2020.19	5.1959	30	2.344	0.122
APO-USP47	1115	1131	GRALKKGEYRVKVYQLL	2020.19	5.1563	600	3.442	0
APO-USP47	1115	1131	GRALKKGEYRVKVYQLL	2020.19	5.1614	3600	3.799	0.12
APO-USP47	1118	1126	LKKGEYRVK	1119.68	2.3388	0	0	0
APO-USP47	1118	1126	LKKGEYRVK	1119.68	2.3958	30	1.022	0
APO-USP47	1118	1126	LKKGEYRVK	1119.68	2.3604	600	2.04	0
APO-USP47	1118	1126	LKKGEYRVK	1119.68	2.3265	3600	2.296	0.036
APO-USP47	1121	1124	GEYR	523.239	2.1783	0	0	0
APO-USP47	1121	1124	GEYR	523.239	2.1822	30	0.249	0.039
APO-USP47	1121	1124	GEYR	523.239	2.1873	600	1.154	0
APO-USP47	1121	1124	GEYR	523.239	2.1679	3600	1.324	0.044
APO-USP47	1125	1131	VKVYQLL	861.532	6.3822	0	0	0
APO-USP47	1125	1131	VKVYQLL	861.532	6.3664	30	0.051	0.003
APO-USP47	1125	1131	VKVYQLL	861.532	6.43	600	0.112	0
APO-USP47	1125	1131	VKVYQLL	861.532	6.4062	3600	0.328	0.046
APO-USP47	1127	1130	VYQL	521.285	5.4431	0	0	0
APO-USP47	1127	1130	VYQL	521.285	5.4666	30	0.05	0.007
APO-USP47	1127	1130	VYQL	521.285	5.4514	600	0.049	0
APO-USP47	1127	1130	VYQL	521.285	5.4187	3600	0.062	0.014
APO-USP47	1127	1131	VYQLL	634.369	6.61	0	0	0
APO-USP47	1127	1131	VYQLL	634.369	6.5805	30	0.061	0.005
APO-USP47	1127	1131	VYQLL	634.369	6.5809	600	0.114	0
APO-USP47	1127	1131	VYQLL	634.369	6.574	3600	0.252	0
APO-USP47	1131	1139	LVNEQEPCK	1058.51	3.1738	0	0	0
APO-USP47	1131	1139	LVNEQEPCK	1058.51	3.1687	30	2.42	0.145
APO-USP47	1131	1139	LVNEQEPCK	1058.51	3.1748	600	3.38	0
APO-USP47	1131	1139	LVNEQEPCK	1058.51	3.1797	3600	3.404	0.031
APO-USP47	1131	1140	LVNEQEPCKF	1205.58	5.2338	0	0	0
APO-USP47	1131	1140	LVNEQEPCKF	1205.58	5.2458	30	2.823	0.04
APO-USP47	1131	1140	LVNEQEPCKF	1205.58	5.2362	600	3.848	0
APO-USP47	1131	1140	LVNEQEPCKF	1205.58	5.2457	3600	3.916	0.118
APO-USP47	1132	1142	VNEQEPCKFLL	1318.66	6.9484	0	0	0
APO-USP47	1132	1142	VNEQEPCKFLL	1318.66	6.9445	30	2.09	0.032
APO-USP47	1132	1142	VNEQEPCKFLL	1318.66	6.9715	600	2.776	0
APO-USP47	1132	1142	VNEQEPCKFLL	1318.66	7.012	3600	2.954	0.134
APO-USP47	1134	1140	EQEPCKF	879.38	4.7375	0	0	0
APO-USP47	1134	1140	EQEPCKF	879.38	4.7398	30	1.428	0.01
APO-USP47	1134	1140	EQEPCKF	879.38	4.7392	600	1.956	0
APO-USP47	1134	1140	EQEPCKF	879.38	4.732	3600	2.043	0.087
APO-USP47	1141	1146	LLDAVF	676.38	7.1918	0	0	0
APO-USP47	1141	1146	LLDAVF	676.38	7.2019	30	0.657	0.028
APO-USP47	1141	1146	LLDAVF	676.38	7.18	600	1.002	0
APO-USP47	1141	1146	LLDAVF	676.38	7.184	3600	0.972	0.034
APO-USP47	1146	1163	FAKGMTVRQSKEELIPQL	2074.12	5.7715	0	0	0
APO-USP47	1146	1163	FAKGMTVRQSKEELIPQL	2074.12	5.795	30	1.096	0.108
APO-USP47	1146	1163	FAKGMTVRQSKEELIPQL	2074.12	5.7799	600	2.507	0
APO-USP47	1146	1163	FAKGMTVRQSKEELIPQL	2074.12	5.7893	3600	3.805	0.18
APO-USP47	1147	1159	AKGMTVRQSKEEL	1475.78	3.6427	0	0	0
APO-USP47	1147	1159	AKGMTVRQSKEEL	1475.78	3.6535	30	1.138	0.177
APO-USP47	1147	1159	AKGMTVRQSKEEL	1475.78	3.6319	600	2.044	0
APO-USP47	1147	1159	AKGMTVRQSKEEL	1475.78	3.6302	3600	3.002	0.301
APO-USP47	1147	1163	AKGMTVRQSKEELIPQL	1927.06	5.6369	0	0	0
APO-USP47	1147	1163	AKGMTVRQSKEELIPQL	1927.06	5.633	30	0.828	0
APO-USP47	1147	1163	AKGMTVRQSKEELIPQL	1927.06	5.6378	600	1.697	0
APO-USP47	1147	1163	AKGMTVRQSKEELIPQL	1927.06	5.6429	3600	2.814	0.238
APO-USP47	1147	1168	AKGMTVRQSKEELIPQLREQCG	2500.29	5.0526	0	0	0
APO-USP47	1147	1168	AKGMTVRQSKEELIPQLREQCG	2500.29	5.0771	30	1.248	0.08
APO-USP47	1147	1168	AKGMTVRQSKEELIPQLREQCG	2500.29	5.1053	600	3.608	0
APO-USP47	1147	1168	AKGMTVRQSKEELIPQLREQCG	2500.29	5.0695	3600	5.054	0
APO-USP47	1149	1163	GMTVRQSKEELIPQL	1727.92	6.0334	0	0	0
APO-USP47	1149	1163	GMTVRQSKEELIPQL	1727.92	6.0014	30	0.595	0.012
APO-USP47	1149	1163	GMTVRQSKEELIPQL	1727.92	6.0328	600	1.387	0
APO-USP47	1149	1163	GMTVRQSKEELIPQL	1727.92	6.039	3600	2.317	0.175
APO-USP47	1151	1159	TVRQSKEEL	1088.58	3.2449	0	0	0
APO-USP47	1151	1159	TVRQSKEEL	1088.58	3.243	30	0.371	0.003
APO-USP47	1151	1159	TVRQSKEEL	1088.58	3.2547	600	0.532	0
APO-USP47	1151	1159	TVRQSKEEL	1088.58	3.233	3600	0.952	0.151
APO-USP47	1151	1163	TVRQSKEELIPQL	1539.86	5.8829	0	0	0
APO-USP47	1151	1163	TVRQSKEELIPQL	1539.86	5.9037	30	0.442	0.018
APO-USP47	1151	1163	TVRQSKEELIPQL	1539.86	5.9174	600	1.072	0
APO-USP47	1151	1163	TVRQSKEELIPQL	1539.86	5.9236	3600	1.372	0.002
APO-USP47	1152	1163	VRQSKEELIPQL	1438.81	5.8877	0	0	0
APO-USP47	1152	1163	VRQSKEELIPQL	1438.81	5.8971	30	0.461	0.003
APO-USP47	1152	1163	VRQSKEELIPQL	1438.81	5.9086	600	1.136	0
APO-USP47	1152	1163	VRQSKEELIPQL	1438.81	5.8792	3600	1.399	0.057
APO-USP47	1158	1163	ELIPQL	711.417	6.6462	0	0	0
APO-USP47	1158	1163	ELIPQL	711.417	6.6432	30	0.179	0
APO-USP47	1158	1163	ELIPQL	711.417	6.6275	600	0.603	0
APO-USP47	1158	1163	ELIPQL	711.417	6.627	3600	0.675	0.016
APO-USP47	1169	1171	LEL	373.221	5.6695	0	0	0
APO-USP47	1169	1171	LEL	373.221	5.7373	30	0.248	0.017
APO-USP47	1169	1171	LEL	373.221	5.68	600	0.784	0
APO-USP47	1169	1171	LEL	373.221	5.7139	3600	0.803	0.017
APO-USP47	1171	1176	LSIDRF	749.407	5.5415	0	0	0
APO-USP47	1171	1176	LSIDRF	749.407	5.5631	30	2.822	0.034
APO-USP47	1171	1176	LSIDRF	749.407	5.5513	600	2.939	0
APO-USP47	1171	1176	LSIDRF	749.407	5.5486	3600	2.824	0.06
APO-USP47	1171	1190	LSIDRFRLRKKTWKNPGTVF	2461.41	5.3007	0	0	0
APO-USP47	1171	1190	LSIDRFRLRKKTWKNPGTVF	2461.41	4.676	30	0.949	0
APO-USP47	1171	1190	LSIDRFRLRKKTWKNPGTVF	2461.41	4.6948	600	1.096	0
APO-USP47	1171	1190	LSIDRFRLRKKTWKNPGTVF	2461.41	4.6721	3600	1.02	0.056
APO-USP47	1172	1190	SIDRFRLRKKTWKNPGTVF	2348.32	4.881	0	0	0
APO-USP47	1172	1190	SIDRFRLRKKTWKNPGTVF	2348.32	4.9584	30	2.226	0.023
APO-USP47	1172	1190	SIDRFRLRKKTWKNPGTVF	2348.32	4.9167	600	3.439	0
APO-USP47	1172	1190	SIDRFRLRKKTWKNPGTVF	2348.32	5.0005	3600	4.5	0.225
APO-USP47	1176	1190	FRLRKKTWKNPGTVF	1877.08	4.7146	0	0	0
APO-USP47	1176	1190	FRLRKKTWKNPGTVF	1877.08	4.752	30	1.909	0.014
APO-USP47	1176	1190	FRLRKKTWKNPGTVF	1877.08	4.7569	600	2.871	0
APO-USP47	1176	1190	FRLRKKTWKNPGTVF	1877.08	4.7475	3600	3.562	0.208
APO-USP47	1177	1190	RLRKKTWKNPGTVF	1730.01	4.3186	0	0	0
APO-USP47	1177	1190	RLRKKTWKNPGTVF	1730.01	4.3614	30	1.975	0.026
APO-USP47	1177	1190	RLRKKTWKNPGTVF	1730.01	4.3731	600	2.899	0
APO-USP47	1177	1190	RLRKKTWKNPGTVF	1730.01	4.3559	3600	3.62	0.178
APO-USP47	1178	1184	LRKKTWK	958.608	2.0407	0	0	0
APO-USP47	1178	1184	LRKKTWK	958.608	2.1456	30	1.254	0.081
APO-USP47	1178	1184	LRKKTWK	958.608	2.1429	600	1.543	0
APO-USP47	1178	1184	LRKKTWK	958.608	2.0724	3600	1.792	0.05
APO-USP47	1178	1190	LRKKTWKNPGTVF	1573.91	4.5792	0	0	0
APO-USP47	1178	1190	LRKKTWKNPGTVF	1573.91	4.641	30	1.86	0.02
APO-USP47	1178	1190	LRKKTWKNPGTVF	1573.91	4.6371	600	2.789	0
APO-USP47	1178	1190	LRKKTWKNPGTVF	1573.91	4.6477	3600	3.46	0.174
APO-USP47	1179	1190	RKKTWKNPGTVF	1460.83	4.4335	0	0	0
APO-USP47	1179	1190	RKKTWKNPGTVF	1460.83	4.4857	30	1.97	0.056
APO-USP47	1179	1190	RKKTWKNPGTVF	1460.83	4.4862	600	2.835	0
APO-USP47	1179	1190	RKKTWKNPGTVF	1460.83	4.4657	3600	3.378	0.132
APO-USP47	1182	1190	TWKNPGTVF	1048.53	6.0497	0	0	0
APO-USP47	1182	1190	TWKNPGTVF	1048.53	6.0624	30	1.343	0.053
APO-USP47	1182	1190	TWKNPGTVF	1048.53	6.0617	600	2.152	0
APO-USP47	1182	1190	TWKNPGTVF	1048.53	6.0612	3600	2.701	0.128
APO-USP47	1191	1196	LDYHIY	822.391	5.6539	0	0	0
APO-USP47	1191	1196	LDYHIY	822.391	5.5942	30	0.558	0.022
APO-USP47	1191	1196	LDYHIY	822.391	5.7643	600	1.308	0
APO-USP47	1191	1196	LDYHIY	822.391	5.604	3600	1.788	0.037
APO-USP47	1194	1199	HIYEED	804.329	3.2519	0	0	0
APO-USP47	1194	1199	HIYEED	804.329	3.2502	30	1.361	0
APO-USP47	1194	1199	HIYEED	804.329	3.2414	600	1.943	0
APO-USP47	1194	1199	HIYEED	804.329	3.2419	3600	1.965	0.184
APO-USP47	1200	1205	INISSN	646.329	3.7064	0	0	0
APO-USP47	1200	1205	INISSN	646.329	3.6402	30	2.667	0.014
APO-USP47	1200	1205	INISSN	646.329	3.6452	600	2.794	0
APO-USP47	1200	1205	INISSN	646.329	3.638	3600	2.73	0.038
APO-USP47	1200	1206	INISSNW	832.408	6.3474	0	0	0
APO-USP47	1200	1206	INISSNW	832.408	6.352	30	3.241	0.057
APO-USP47	1200	1206	INISSNW	832.408	6.3612	600	3.422	0
APO-USP47	1200	1206	INISSNW	832.408	6.3585	3600	3.339	0.071
APO-USP47	1206	1209	WEVF	579.269	7.5439	0	0	0
APO-USP47	1206	1209	WEVF	579.269	7.5724	30	0.014	0.001
APO-USP47	1206	1209	WEVF	579.269	7.544	600	0.019	0
APO-USP47	1206	1209	WEVF	579.269	7.68	3600	0.015	0.001
APO-USP47	1208	1221	VFLEVLDGVEKMKS	1592.85	6.2523	0	0	0
APO-USP47	1208	1221	VFLEVLDGVEKMKS	1592.85	6.2599	30	4.958	0.046
APO-USP47	1208	1221	VFLEVLDGVEKMKS	1592.85	6.2858	600	5.183	0
APO-USP47	1208	1221	VFLEVLDGVEKMKS	1592.85	6.2875	3600	5.148	0.084
APO-USP47	1210	1217	LEVLDGVE	872.449	5.9801	0	0	0
APO-USP47	1210	1217	LEVLDGVE	872.449	5.9969	30	1.726	0.177
APO-USP47	1210	1217	LEVLDGVE	872.449	5.9796	600	1.606	0
APO-USP47	1210	1217	LEVLDGVE	872.449	5.989	3600	1.918	0.152
APO-USP47	1210	1220	LEVLDGVEKMK	1259.68	5.4894	0	0	0
APO-USP47	1210	1220	LEVLDGVEKMK	1259.68	5.4888	30	3.937	0.258
APO-USP47	1210	1220	LEVLDGVEKMK	1259.68	5.4958	600	4.516	0
APO-USP47	1210	1220	LEVLDGVEKMK	1259.68	5.4898	3600	4.958	0.002
APO-USP47	1214	1220	DGVEKMK	805.4	2.4397	0	0	0
APO-USP47	1214	1220	DGVEKMK	805.4	2.4363	30	2.802	0.085
APO-USP47	1214	1220	DGVEKMK	805.4	2.4425	600	3.499	0
APO-USP47	1214	1220	DGVEKMK	805.4	2.4497	3600	3.391	0.112
APO-USP47	1221	1225	SMSQL	564.258	4.7515	0	0	0
APO-USP47	1221	1225	SMSQL	564.258	4.7587	30	0.58	0.018
APO-USP47	1221	1225	SMSQL	564.258	4.7614	600	1.084	0
APO-USP47	1221	1225	SMSQL	564.258	4.7675	3600	1.291	0.097
APO-USP47	1229	1235	SRRWKPS	915.504	2.652	0	0	0
APO-USP47	1229	1235	SRRWKPS	915.504	2.6682	30	0.145	0.001
APO-USP47	1229	1235	SRRWKPS	915.504	2.6888	600	0.303	0
APO-USP47	1229	1235	SRRWKPS	915.504	2.6838	3600	0.58	0.058
APO-USP47	1229	1236	SRRWKPSE	1044.55	2.9616	0	0	0
APO-USP47	1229	1236	SRRWKPSE	1044.55	2.9756	30	0.249	0.01
APO-USP47	1229	1236	SRRWKPSE	1044.55	2.9884	600	0.685	0
APO-USP47	1229	1236	SRRWKPSE	1044.55	2.9834	3600	1.115	0.07
APO-USP47	1229	1244	SRRWKPSEMKLDPFQE	2033.02	5.8107	0	0	0
APO-USP47	1229	1244	SRRWKPSEMKLDPFQE	2033.02	5.8405	30	1.171	0.062
APO-USP47	1229	1244	SRRWKPSEMKLDPFQE	2033.02	5.8509	600	2.415	0
APO-USP47	1229	1244	SRRWKPSEMKLDPFQE	2033.02	5.8348	3600	2.805	0.061
APO-USP47	1236	1247	EMKLDPFQEVVL	1446.74	7.5927	0	0	0
APO-USP47	1236	1247	EMKLDPFQEVVL	1446.74	7.5835	30	1.065	0.083
APO-USP47	1236	1247	EMKLDPFQEVVL	1446.74	7.6438	600	2.65	0
APO-USP47	1236	1247	EMKLDPFQEVVL	1446.74	7.6322	3600	2.825	0.002
APO-USP47	1237	1243	MKLDPFQ	877.437	6.2346	0	0	0
APO-USP47	1237	1243	MKLDPFQ	877.437	6.2305	30	0.409	0
APO-USP47	1237	1243	MKLDPFQ	877.437	6.3013	600	1.382	0
APO-USP47	1237	1243	MKLDPFQ	877.437	6.2342	3600	1.605	0.063
APO-USP47	1237	1244	MKLDPFQE	1006.48	6.2686	0	0	0
APO-USP47	1237	1244	MKLDPFQE	1006.48	6.2277	30	0.887	0.013
APO-USP47	1237	1244	MKLDPFQE	1006.48	6.2303	600	1.907	0
APO-USP47	1237	1244	MKLDPFQE	1006.48	6.2642	3600	2.093	0.047
APO-USP47	1237	1247	MKLDPFQEVVL	1317.7	7.5409	0	0	0
APO-USP47	1237	1247	MKLDPFQEVVL	1317.7	7.5181	30	1.246	0.034
APO-USP47	1237	1247	MKLDPFQEVVL	1317.7	7.4907	600	2.71	0
APO-USP47	1237	1247	MKLDPFQEVVL	1317.7	7.5035	3600	2.877	0.073
APO-USP47	1238	1244	KLDPFQE	875.439	5.4409	0	0	0
APO-USP47	1238	1244	KLDPFQE	875.439	5.4477	30	0.699	0.016
APO-USP47	1238	1244	KLDPFQE	875.439	5.4315	600	1.248	0
APO-USP47	1238	1244	KLDPFQE	875.439	5.4476	3600	1.381	0.021
APO-USP47	1238	1247	KLDPFQEVVL	1186.66	7.1045	0	0	0
APO-USP47	1238	1247	KLDPFQEVVL	1186.66	7.132	30	1.085	0.014
APO-USP47	1238	1247	KLDPFQEVVL	1186.66	7.098	600	2.106	0
APO-USP47	1238	1247	KLDPFQEVVL	1186.66	7.0797	3600	2.285	0.042
APO-USP47	1245	1255	VVLESSSVDEL	1175.59	5.9095	0	0	0
APO-USP47	1245	1255	VVLESSSVDEL	1175.59	5.9059	30	2.403	0.022
APO-USP47	1245	1255	VVLESSSVDEL	1175.59	5.8908	600	3.779	0
APO-USP47	1245	1255	VVLESSSVDEL	1175.59	5.9103	3600	3.826	0.147
APO-USP47	1248	1254	ESSSVDE	751.287	2.4268	0	0	0
APO-USP47	1248	1254	ESSSVDE	751.287	2.4386	30	1.82	0.023
APO-USP47	1248	1254	ESSSVDE	751.287	2.4359	600	2.763	0
APO-USP47	1248	1254	ESSSVDE	751.287	2.4475	3600	2.671	0.042
APO-USP47	1248	1255	ESSSVDEL	864.371	4.9061	0	0	0
APO-USP47	1248	1255	ESSSVDEL	864.371	4.8763	30	1.759	0.086
APO-USP47	1248	1255	ESSSVDEL	864.371	4.9012	600	2.576	0
APO-USP47	1248	1255	ESSSVDEL	864.371	4.8673	3600	2.534	0.057
APO-USP47	1248	1258	ESSSVDELREK	1277.61	3.5559	0	0	0
APO-USP47	1248	1258	ESSSVDELREK	1277.61	3.5448	30	1.513	0.04
APO-USP47	1248	1258	ESSSVDELREK	1277.61	3.552	600	2.318	0
APO-USP47	1248	1258	ESSSVDELREK	1277.61	3.5503	3600	2.281	0.065
APO-USP47	1248	1269	ESSSVDELREKLSEISGIPLDD	2417.18	7.6578	0	0	0
APO-USP47	1248	1269	ESSSVDELREKLSEISGIPLDD	2417.18	7.634	30	3.043	0
APO-USP47	1248	1269	ESSSVDELREKLSEISGIPLDD	2417.18	7.615	600	4.886	0
APO-USP47	1248	1269	ESSSVDELREKLSEISGIPLDD	2417.18	7.6454	3600	5.427	0
APO-USP47	1254	1271	ELREKLSEISGIPLDDIE	2055.07	6.7221	0	0	0
APO-USP47	1254	1271	ELREKLSEISGIPLDDIE	2055.07	6.6992	30	1.642	0.067
APO-USP47	1254	1271	ELREKLSEISGIPLDDIE	2055.07	6.7007	600	2.63	0
APO-USP47	1254	1271	ELREKLSEISGIPLDDIE	2055.07	6.6903	3600	3.035	0.187
APO-USP47	1255	1269	LREKLSEISGIPLDD	1683.9	5.7438	0	0	0
APO-USP47	1255	1269	LREKLSEISGIPLDD	1683.9	5.7501	30	1.483	0
APO-USP47	1255	1269	LREKLSEISGIPLDD	1683.9	5.7621	600	2.88	0
APO-USP47	1255	1269	LREKLSEISGIPLDD	1683.9	5.7405	3600	3.318	0.016
APO-USP47	1255	1271	LREKLSEISGIPLDDIE	1926.03	6.3034	0	0	0
APO-USP47	1255	1271	LREKLSEISGIPLDDIE	1926.03	6.2798	30	1.237	0.096
APO-USP47	1255	1271	LREKLSEISGIPLDDIE	1926.03	6.2747	600	2.258	0
APO-USP47	1255	1271	LREKLSEISGIPLDDIE	1926.03	6.3119	3600	2.595	0.122
APO-USP47	1256	1271	REKLSEISGIPLDDIE	1812.95	6.2024	0	0	0
APO-USP47	1256	1271	REKLSEISGIPLDDIE	1812.95	6.1833	30	1.26	0.057
APO-USP47	1256	1271	REKLSEISGIPLDDIE	1812.95	6.1815	600	2.183	0
APO-USP47	1256	1271	REKLSEISGIPLDDIE	1812.95	6.1466	3600	2.468	0.115
APO-USP47	1258	1271	KLSEISGIPLDDIE	1527.8	6.4476	0	0	0
APO-USP47	1258	1271	KLSEISGIPLDDIE	1527.8	6.4363	30	1.187	0.023
APO-USP47	1258	1271	KLSEISGIPLDDIE	1527.8	6.4011	600	2.224	0
APO-USP47	1258	1271	KLSEISGIPLDDIE	1527.8	6.4395	3600	2.4	0.096
APO-USP47	1260	1271	SEISGIPLDDIE	1286.62	6.5719	0	0	0
APO-USP47	1260	1271	SEISGIPLDDIE	1286.62	6.5528	30	1.129	0.07
APO-USP47	1260	1271	SEISGIPLDDIE	1286.62	6.5232	600	1.983	0
APO-USP47	1260	1271	SEISGIPLDDIE	1286.62	6.546	3600	2.227	0.078
APO-USP47	1262	1267	ISGIPL	598.369	6.0474	0	0	0
APO-USP47	1262	1267	ISGIPL	598.369	6.1567	30	0.718	0.059
APO-USP47	1262	1267	ISGIPL	598.369	6.1305	600	1.355	0
APO-USP47	1262	1267	ISGIPL	598.369	6.0944	3600	1.332	0.02
APO-USP47	1262	1269	ISGIPLDD	828.423	5.4587	0	0	0
APO-USP47	1262	1269	ISGIPLDD	828.423	5.4932	30	1.094	0.07
APO-USP47	1262	1269	ISGIPLDD	828.423	5.4625	600	1.859	0
APO-USP47	1262	1269	ISGIPLDD	828.423	5.4764	3600	1.788	0.037
APO-USP47	1262	1271	ISGIPLDDIE	1070.55	6.4743	0	0	0
APO-USP47	1262	1271	ISGIPLDDIE	1070.55	6.474	30	1.071	0.053
APO-USP47	1262	1271	ISGIPLDDIE	1070.55	6.4433	600	1.723	0
APO-USP47	1262	1271	ISGIPLDDIE	1070.55	6.4118	3600	1.702	0.049
APO-USP47	1272	1285	FAKGRGTFPCDISV	1496.74	5.9203	0	0	0
APO-USP47	1272	1285	FAKGRGTFPCDISV	1496.74	5.9082	30	3.617	0.038
APO-USP47	1272	1285	FAKGRGTFPCDISV	1496.74	5.9197	600	5.361	0
APO-USP47	1272	1285	FAKGRGTFPCDISV	1496.74	5.9236	3600	5.416	0.132
APO-USP47	1272	1286	FAKGRGTFPCDISVL	1609.83	6.5911	0	0	0
APO-USP47	1272	1286	FAKGRGTFPCDISVL	1609.83	6.5683	30	3.626	0.053
APO-USP47	1272	1286	FAKGRGTFPCDISVL	1609.83	6.6186	600	5.323	0
APO-USP47	1272	1286	FAKGRGTFPCDISVL	1609.83	6.5427	3600	5.538	0.16
APO-USP47	1277	1282	GTFPCD	638.237	4.8115	0	0	0
APO-USP47	1277	1282	GTFPCD	638.237	4.8552	30	0.89	0.032
APO-USP47	1277	1282	GTFPCD	638.237	4.788	600	1.436	0
APO-USP47	1277	1282	GTFPCD	638.237	4.8329	3600	1.369	0.038
APO-USP47	1277	1285	GTFPCDISV	937.422	6.4894	0	0	0
APO-USP47	1277	1285	GTFPCDISV	937.422	6.3154	30	1.393	0.068
APO-USP47	1277	1285	GTFPCDISV	937.422	6.2436	600	2.163	0
APO-USP47	1277	1285	GTFPCDISV	937.422	6.3186	3600	2.059	0.035
APO-USP47	1277	1286	GTFPCDISVL	1050.51	7.4902	0	0	0
APO-USP47	1277	1286	GTFPCDISVL	1050.51	7.467	30	2.279	0.114
APO-USP47	1277	1286	GTFPCDISVL	1050.51	7.4974	600	3.768	0
APO-USP47	1277	1286	GTFPCDISVL	1050.51	7.4891	3600	3.822	0.12
APO-USP47	1286	1291	LDIHQD	739.35	3.557	0	0	0
APO-USP47	1286	1291	LDIHQD	739.35	3.5758	30	0.746	0.046
APO-USP47	1286	1291	LDIHQD	739.35	3.5409	600	1.156	0
APO-USP47	1286	1291	LDIHQD	739.35	3.5359	3600	1.404	0.044
APO-USP47	1286	1292	LDIHQDL	852.434	5.1702	0	0	0
APO-USP47	1286	1292	LDIHQDL	852.434	5.1615	30	0.649	0.027
APO-USP47	1286	1292	LDIHQDL	852.434	5.2029	600	0.991	0
APO-USP47	1286	1292	LDIHQDL	852.434	5.1525	3600	1.431	0.06
APO-USP47	1287	1297	DIHQDLDWNPK	1379.65	5.4128	0	0	0
APO-USP47	1287	1297	DIHQDLDWNPK	1379.65	5.4233	30	1.887	0.021
APO-USP47	1287	1297	DIHQDLDWNPK	1379.65	5.5025	600	2.864	0
APO-USP47	1287	1297	DIHQDLDWNPK	1379.65	5.4476	3600	3.276	0.009
APO-USP47	1287	1301	DIHQDLDWNPKVSTL	1779.88	6.2076	0	0	0
APO-USP47	1287	1301	DIHQDLDWNPKVSTL	1779.88	6.261	30	4.518	0.011
APO-USP47	1287	1301	DIHQDLDWNPKVSTL	1779.88	6.3523	600	5.809	0
APO-USP47	1287	1301	DIHQDLDWNPKVSTL	1779.88	6.2986	3600	6.085	0.144
APO-USP47	1298	1301	VSTL	418.243	3.864	0	0	0
APO-USP47	1298	1301	VSTL	418.243	3.8643	30	1.324	0.035
APO-USP47	1298	1301	VSTL	418.243	3.9115	600	1.496	0
APO-USP47	1298	1301	VSTL	418.243	3.8588	3600	1.419	0.041
APO-USP47	1302	1306	NVWPL	627.338	7.3552	0	0	0
APO-USP47	1302	1306	NVWPL	627.338	7.4071	30	0.832	0.034
APO-USP47	1302	1306	NVWPL	627.338	7.3975	600	1.318	0
APO-USP47	1302	1306	NVWPL	627.338	7.3693	3600	1.411	0.043
APO-USP47	1302	1307	NVWPLY	790.401	7.545	0	0	0
APO-USP47	1302	1307	NVWPLY	790.401	7.5835	30	1.052	0.048
APO-USP47	1302	1307	NVWPLY	790.401	7.595	600	2.027	0
APO-USP47	1302	1307	NVWPLY	790.401	7.5934	3600	2.129	0.046
APO-USP47	1311	1316	DGAVIF	620.317	6.4654	0	0	0
APO-USP47	1311	1316	DGAVIF	620.317	6.4729	30	0.199	0.003
APO-USP47	1311	1316	DGAVIF	620.317	6.5276	600	0.682	0
APO-USP47	1311	1316	DGAVIF	620.317	6.5072	3600	0.889	0.023
APO-USP47	1317	1323	YRDKTEE	939.43	1.9615	0	0	0
APO-USP47	1317	1323	YRDKTEE	939.43	2.0103	30	0.559	0.019
APO-USP47	1317	1323	YRDKTEE	939.43	1.9831	600	0.8	0
APO-USP47	1317	1323	YRDKTEE	939.43	1.9714	3600	0.798	0.042
APO-USP47	1317	1324	YRDKTEEL	1052.51	3.6748	0	0	0
APO-USP47	1317	1324	YRDKTEEL	1052.51	3.6702	30	1.245	0.153
APO-USP47	1317	1324	YRDKTEEL	1052.51	3.7251	600	1.447	0
APO-USP47	1317	1324	YRDKTEEL	1052.51	3.6946	3600	1.499	0.004
APO-USP47	1324	1335	LMELTDEQRNEL	1489.71	5.6724	0	0	0
APO-USP47	1324	1335	LMELTDEQRNEL	1489.71	5.7284	30	2.637	0.067
APO-USP47	1324	1335	LMELTDEQRNEL	1489.71	5.7333	600	5.271	0
APO-USP47	1324	1335	LMELTDEQRNEL	1489.71	5.7106	3600	5.657	0.195
APO-USP47	1325	1335	MELTDEQRNEL	1376.62	5.1569	0	0	0
APO-USP47	1325	1335	MELTDEQRNEL	1376.62	5.1714	30	2.244	0.055
APO-USP47	1325	1335	MELTDEQRNEL	1376.62	5.1452	600	4.74	0
APO-USP47	1325	1335	MELTDEQRNEL	1376.62	5.1447	3600	5.195	0.156
APO-USP47	1327	1335	LTDEQRNEL	1116.54	4.1809	0	0	0
APO-USP47	1327	1335	LTDEQRNEL	1116.54	4.2016	30	1.188	0.036
APO-USP47	1327	1335	LTDEQRNEL	1116.54	4.1844	600	3.161	0
APO-USP47	1327	1335	LTDEQRNEL	1116.54	4.1828	3600	3.648	0.09
APO-USP47	1328	1335	TDEQRNEL	1003.46	3.6813	0	0	0
APO-USP47	1328	1335	TDEQRNEL	1003.46	3.6924	30	0.928	0.036
APO-USP47	1328	1335	TDEQRNEL	1003.46	3.694	600	2.944	0
APO-USP47	1328	1335	TDEQRNEL	1003.46	3.6868	3600	3.462	0.133
APO-USP47	1335	1342	LMKKESSR	977.533	2.3854	0	0	0
APO-USP47	1335	1342	LMKKESSR	977.533	2.4818	30	2.444	0.039
APO-USP47	1335	1342	LMKKESSR	977.533	2.4137	600	2.696	0
APO-USP47	1335	1342	LMKKESSR	977.533	2.4486	3600	2.507	0.018
APO-USP47	1336	1343	MKKESSRL	977.533	2.4645	0	0	0
APO-USP47	1336	1343	MKKESSRL	977.533	2.4951	30	2.432	0.002
APO-USP47	1336	1343	MKKESSRL	977.533	2.4825	600	2.672	0
APO-USP47	1336	1343	MKKESSRL	977.533	2.4907	3600	2.514	0.033
APO-USP47	1336	1375	MKKESSRLQKTGHRVTYSPRKEKALKIYLDGAPNKDLTQD	4629.48	4.2215	0	0	0
APO-USP47	1336	1375	MKKESSRLQKTGHRVTYSPRKEKALKIYLDGAPNKDLTQD	4629.48	4.185	30	15.192	0.086
APO-USP47	1336	1375	MKKESSRLQKTGHRVTYSPRKEKALKIYLDGAPNKDLTQD	4629.48	4.1867	600	16.14	0
APO-USP47	1336	1375	MKKESSRLQKTGHRVTYSPRKEKALKIYLDGAPNKDLTQD	4629.48	4.1972	3600	15.626	0.27
APO-USP47	1359	1364	ALKIYL	719.458	6.4169	0	0	0
APO-USP47	1359	1364	ALKIYL	719.458	6.4762	30	2.841	0.008
APO-USP47	1359	1364	ALKIYL	719.458	6.4211	600	2.918	0
APO-USP47	1359	1364	ALKIYL	719.458	6.4184	3600	2.887	0.052
APO-USP47	1359	1370	ALKIYLDGAPNK	1301.73	5.0478	0	0	0
APO-USP47	1359	1370	ALKIYLDGAPNK	1301.73	5.0494	30	4.581	0.027
APO-USP47	1359	1370	ALKIYLDGAPNK	1301.73	5.052	600	4.621	0
APO-USP47	1359	1370	ALKIYLDGAPNK	1301.73	5.0604	3600	4.654	0.072
APO-USP47	1359	1375	ALKIYLDGAPNKDLTQD	1873.98	5.4664	0	0	0
APO-USP47	1359	1375	ALKIYLDGAPNKDLTQD	1873.98	5.4488	30	7.453	0.027
APO-USP47	1359	1375	ALKIYLDGAPNKDLTQD	1873.98	5.4581	600	7.751	0
APO-USP47	1359	1375	ALKIYLDGAPNKDLTQD	1873.98	5.4476	3600	7.582	0.094
APO-USP47	1362	1375	IYLDGAPNKDLTQD	1561.76	5.1273	0	0	0
APO-USP47	1362	1375	IYLDGAPNKDLTQD	1561.76	5.137	30	5.392	0.145
APO-USP47	1362	1375	IYLDGAPNKDLTQD	1561.76	5.1763	600	5.756	0
APO-USP47	1362	1375	IYLDGAPNKDLTQD	1561.76	5.1769	3600	5.528	0.141
APO-USP47	1364	1370	LDGAPNK	713.371	2.3754	0	0	0
APO-USP47	1364	1370	LDGAPNK	713.371	2.3687	30	2.286	0.013
APO-USP47	1364	1370	LDGAPNK	713.371	2.3671	600	2.414	0
APO-USP47	1364	1370	LDGAPNK	713.371	2.3709	3600	2.329	0.031
APO-USP47	1365	1375	DGAPNKDLTQD	1172.53	3.2619	0	0	0
APO-USP47	1365	1375	DGAPNKDLTQD	1172.53	3.2397	30	4.685	0.021
APO-USP47	1365	1375	DGAPNKDLTQD	1172.53	3.2502	600	4.936	0
APO-USP47	1365	1375	DGAPNKDLTQD	1172.53	3.2452	3600	4.775	0.074
APO-USP47	1371	1375	DLTQD	590.255	3.0252	0	0	0
APO-USP47	1371	1375	DLTQD	590.255	3.03	30	1.591	0.019
APO-USP47	1371	1375	DLTQD	590.255	3.1126	600	1.615	0
APO-USP47	1371	1375	DLTQD	590.255	3.03	3600	1.639	0.002
HOLO-USP47	2	12	VPGEENQLVPK	1208.64	4.3185	0	0	0
HOLO-USP47	2	12	VPGEENQLVPK	1208.64	4.3211	30	4.869	0.016
HOLO-USP47	2	12	VPGEENQLVPK	1208.64	4.3202	600	4.855	0.062
HOLO-USP47	2	12	VPGEENQLVPK	1208.64	4.3178	3600	4.766	0.09
HOLO-USP47	38	54	AEEPRVLCIIQDTTNSK	1915.97	6.3229	0	0	0
HOLO-USP47	38	54	AEEPRVLCIIQDTTNSK	1915.97	6.3261	30	11.988	0.01
HOLO-USP47	38	54	AEEPRVLCIIQDTTNSK	1915.97	6.3292	600	12.864	0.063
HOLO-USP47	38	54	AEEPRVLCIIQDTTNSK	1915.97	6.326	3600	13.21	0.028
HOLO-USP47	45	73	CIIQDTTNSKTVNERITLNLPASTPVRKL	3224.76	5.5229	0	0	0
HOLO-USP47	45	73	CIIQDTTNSKTVNERITLNLPASTPVRKL	3224.76	5.5283	30	8.567	0.153
HOLO-USP47	45	73	CIIQDTTNSKTVNERITLNLPASTPVRKL	3224.76	5.5466	600	9.766	0
HOLO-USP47	45	73	CIIQDTTNSKTVNERITLNLPASTPVRKL	3224.76	5.524	3600	10.282	0
HOLO-USP47	60	75	ITLNLPASTPVRKLFE	1798.04	6.6642	0	0	0
HOLO-USP47	60	75	ITLNLPASTPVRKLFE	1798.04	6.6345	30	1.706	0.025
HOLO-USP47	60	75	ITLNLPASTPVRKLFE	1798.04	6.6694	600	2.014	0.174
HOLO-USP47	60	75	ITLNLPASTPVRKLFE	1798.04	6.6711	3600	2.555	0.018
HOLO-USP47	89	98	DLVWGNGINT	1087.53	6.5317	0	0	0
HOLO-USP47	89	98	DLVWGNGINT	1087.53	6.5317	30	3.527	0
HOLO-USP47	89	98	DLVWGNGINT	1087.53	6.5333	600	3.995	0.07
HOLO-USP47	89	98	DLVWGNGINT	1087.53	6.5379	3600	4.114	0.034
HOLO-USP47	89	110	DLVWGNGINTADMAPLDHTSDK	2369.1	6.4628	0	0	0
HOLO-USP47	89	110	DLVWGNGINTADMAPLDHTSDK	2369.1	6.518	30	7.201	0.051
HOLO-USP47	89	110	DLVWGNGINTADMAPLDHTSDK	2369.1	6.5111	600	8.56	0.122
HOLO-USP47	89	110	DLVWGNGINTADMAPLDHTSDK	2369.1	6.4869	3600	8.787	0.184
HOLO-USP47	89	115	DLVWGNGINTADMAPLDHTSDKSLLDA	2868.36	7.0396	0	0	0
HOLO-USP47	89	115	DLVWGNGINTADMAPLDHTSDKSLLDA	2868.36	7.0062	30	7.712	0.084
HOLO-USP47	89	115	DLVWGNGINTADMAPLDHTSDKSLLDA	2868.36	7.006	600	9.554	0.135
HOLO-USP47	89	115	DLVWGNGINTADMAPLDHTSDKSLLDA	2868.36	7.0217	3600	10.325	0.11
HOLO-USP47	90	110	LVWGNGINTADMAPLDHTSDK	2254.07	6.2043	0	0	0
HOLO-USP47	90	110	LVWGNGINTADMAPLDHTSDK	2254.07	6.214	30	7.581	0.163
HOLO-USP47	90	110	LVWGNGINTADMAPLDHTSDK	2254.07	6.2175	600	8.986	0.122
HOLO-USP47	90	110	LVWGNGINTADMAPLDHTSDK	2254.07	6.2062	3600	9.247	0.029
HOLO-USP47	99	110	ADMAPLDHTSDK	1299.58	3.7985	0	0	0
HOLO-USP47	99	110	ADMAPLDHTSDK	1299.58	3.8163	30	2.751	0.102
HOLO-USP47	99	110	ADMAPLDHTSDK	1299.58	3.7995	600	3.617	0.093
[truncated: 6,226 more rows]
