# Supplementary material
Source: Research Square preprint supplement (doi:10.21203/rs.3.rs-9106698/v1)
Supplement: Supplementary file 5 [file 6f1db47ef5197bdaf10bad04.xlsx]

## Sheet: Ub raw intensities
T: Protein.Group	T: Protein.Ids	T: Protein.Names	T: Genes	T: First.Protein.Description	No probe 1	No probe 2	No probe 3	Ub probe 1	Ub probe 2	Ub probe 3
A0A075B6R9	A0A075B6R9	KVD24_HUMAN	IGKV2D-24	Probable non-functional immunoglobulin kappa variable 2D-24	20107.4	16739.1	19652.2	16162.5	17368.1	8772.26
A0A075B6S2;A0A0A0MRZ7;A2NJV5	A0A075B6S2;A0A0A0MRZ7;A2NJV5	KV229_HUMAN;KVD26_HUMAN;KVD29_HUMAN	IGKV2-29;IGKV2D-26;IGKV2D-29	Immunoglobulin kappa variable 2D-29	831298	359229	767838	992876	907689	815011
A0A087WSY6	A0A087WSY6	KVD15_HUMAN	IGKV3D-15	Immunoglobulin kappa variable 3D-15	67717.1	26285.8				19641.5
A0A087WSZ0	A0A087WSZ0	KVD08_HUMAN	IGKV1D-8	Immunoglobulin kappa variable 1D-8	11503.9	9977.78	7020.67	9652.13	12101.6	10975.5
A0A0A0MS14	A0A0A0MS14	HV145_HUMAN	IGHV1-45	Immunoglobulin heavy variable 1-45	337476	350729	300697	278943	423663	253288
A0A0A0MT36;A0A0C4DH26	A0A0A0MT36;A0A0C4DH26	KVD21_HUMAN;KVD41_HUMAN	IGKV6D-21;IGKV6D-41	Immunoglobulin kappa variable 6D-21	14270.1	10200.2	9752.84	11770.3	13641.7	10705.6
A0A0B4J1V0	A0A0B4J1V0	HV315_HUMAN	IGHV3-15	Immunoglobulin heavy variable 3-15	10909.7		5125.26	6060.41		4122.13
A0A0B4J1V1;A0A0B4J1X5;P01762;P01763;P01780	P01762;P01763;P01780;P01782;A0A0B4J1V1;A0A0B4J1X5;A0A0C4DH32	HV307_HUMAN;HV311_HUMAN;HV321_HUMAN;HV348_HUMAN;HV374_HUMAN	IGHV3-11;IGHV3-21;IGHV3-48;IGHV3-7;IGHV3-74	Immunoglobulin heavy variable 3-21					2977.53	5772.27
A0A0B4J1Y9	A0A0B4J1Y9	HV372_HUMAN	IGHV3-72	Immunoglobulin heavy variable 3-72	20511.9	11017.7	8296.94	9989.25	26380.1	19664.2
A0A0B4J2D5;P0DPI2	A0A0B4J2D5;P0DPI2	GAL3A_HUMAN;GAL3B_HUMAN	GATD3;GATD3B	Putative glutamine amidotransferase-like class 1 domain-containing protein 3B, mitochondrial	4528.84	4781.01	4055.81	4193.08	6664.69	4125.56
A0A0C4DH29	A0A0C4DH29	HV103_HUMAN	IGHV1-3	Immunoglobulin heavy variable 1-3	15948.4	8411.73	4518.37	3634.64	3713.55
A0A0C4DH31	A0A0C4DH31	HV118_HUMAN	IGHV1-18	Immunoglobulin heavy variable 1-18	16645.5	12497.7	11025.3	11867.7	20075	15443.4
A0A0C4DH55	P01624;A0A075B6H7;A0A0C4DH55	KVD07_HUMAN	IGKV3D-7	Immunoglobulin kappa variable 3D-7	104352	57851.7	45884.6	57311	55540.1	15605.7
A0A0J9YX35	A0A0J9YX35	HV64D_HUMAN	IGHV3-64D	Immunoglobulin heavy variable 3-64D	369194	296611	246708	235790	274210	225249
A0AVF1;A0AVF1-2	A0AVF1;A0AVF1-2;A0AVF1-3	IFT56_HUMAN	IFT56	Intraflagellar transport protein 56	4949.54	5477.56	5107.91	6027.97	5042.17	4125.79
A0AVT1	A0AVT1;A0AVT1-2	UBA6_HUMAN	UBA6	Ubiquitin-like modifier-activating enzyme 6	34565.8	35584.8	35406.9	41352.1	39928.2	38961.1
A0FGR8-2	A0FGR8;A0FGR8-2;A0FGR8-4;A0FGR8-6	ESYT2_HUMAN	ESYT2	Isoform 2 of Extended synaptotagmin-2	8211.92	7836.25	6913.04	7269.73	7207.52	7642.22
A0JLT2	A0JLT2;A0JLT2-2	MED19_HUMAN	MED19	Mediator of RNA polymerase II transcription subunit 19	4176.44	5314.43	3935.82	3655.02	5125.55	3500.71
A0JNW5	A0JNW5;A0JNW5-2	BLT3B_HUMAN	BLTP3B	Bridge-like lipid transfer protein family member 3B	24448.8	19730.1	21353.6	27701.8	26082.1	30321.4
A0MZ66;A0MZ66-3;A0MZ66-4;A0MZ66-5;A0MZ66-6;A0MZ66-8	A0MZ66;A0MZ66-4;A0MZ66-7;A0MZ66-3;A0MZ66-5;A0MZ66-6;A0MZ66-8	SHOT1_HUMAN	SHTN1	Shootin-1	6019.13		4433.07	5084.2	7391.89	5108.93
A1A4S6	A1A4S6	RHG10_HUMAN	ARHGAP10	Rho GTPase-activating protein 10	2680.71	2245.66	2909.34	2104.09	1791.98	2408.41
A1L020	A1L020	MEX3A_HUMAN	MEX3A	RNA-binding protein MEX3A	9315.47	7672.45	8970.81	10217.3	7170.32	11097.5
A1L0T0	A1L0T0	HACL2_HUMAN	ILVBL	2-hydroxyacyl-CoA lyase 2	2650.41	4061.97	3563.2	4020.47	4083.96	3825.48
A1L390	A1L390;A1L390-3	PKHG3_HUMAN	PLEKHG3	Pleckstrin homology domain-containing family G member 3	9069.94	9632.71	9306.64	11057.1	12317.9	12274.2
A1X283	A1X283	SPD2B_HUMAN	SH3PXD2B	SH3 and PX domain-containing protein 2B	53659.7	48169.4	46610.6	52433.4	57292.8	54769
A1XBS5;A1XBS5-2;A1XBS5-3;A1XBS5-4	A1XBS5;A1XBS5-2;A1XBS5-3;A1XBS5-4	CBAR1_HUMAN	CIBAR1	CBY1-interacting BAR domain-containing protein 1	4119.26	2586.26	3383.66	3586.86	4893.15	4152.39
A2RRP1;A2RRP1-2	A2RRP1;A2RRP1-2	NBAS_HUMAN	NBAS	NBAS subunit of NRZ tethering complex	5071.69	4211.49	4628.33	4982.33	3971.96	4123.68
A2RTX5	A2RTX5;A2RTX5-2	SYTC2_HUMAN	TARS3	Threonine--tRNA ligase 2, cytoplasmic	4864.09	3404.96	3115.01	2103.32	1756.41	2894.62
A2RUB1;A2RUB1-2	A2RUB1;A2RUB1-2	MEIOC_HUMAN	MEIOC	Meiosis-specific coiled-coil domain-containing protein MEIOC	3781.77	3219.96	3632.33	3287.75	3620.45	3080.58
A3KMH1	A3KMH1;A3KMH1-2;A3KMH1-3	VWA8_HUMAN	VWA8	von Willebrand factor A domain-containing protein 8	147999	137416	131411	152072	151159	131814
A3KN83;A3KN83-2;A3KN83-3	A3KN83;A3KN83-2;A3KN83-3	SBNO1_HUMAN	SBNO1	Protein strawberry notch homolog 1	51976.5	45189.2	48426.6	46803.9	47860.2	48409.6
A4D1E9	A4D1E9;A4D1E9-2	GTPBA_HUMAN	GTPBP10	GTP-binding protein 10	10815.7	12067.9	10780.6	13515	10986.3	11327.6
A4D1P6;A4D1P6-2	A4D1P6;A4D1P6-2;A4D1P6-3	WDR91_HUMAN	WDR91	WD repeat-containing protein 91	3135.21	2528.68	3733.9	3097.45	2911.47	3610.73
A4D1U4	A4D1U4	DEN11_HUMAN	DENND11	DENN domain-containing protein 11	3089.8	3929.26	3441.66	3220.02	2940.64	3717
A4FU69	A4FU69;A4FU69-3	EFCB5_HUMAN	EFCAB5	EF-hand calcium-binding domain-containing protein 5
A5PLN9;A5PLN9-2;A5PLN9-4;A5PLN9-5	A5PLN9;A5PLN9-2;A5PLN9-4;A5PLN9-5	TPC13_HUMAN	TRAPPC13	Trafficking protein particle complex subunit 13	2718.98	4791.89	3629.86	3134.18	3369.56	4046.08
A5YKK6	A5YKK6;A5YKK6-2;A5YKK6-3	CNOT1_HUMAN	CNOT1	CCR4-NOT transcription complex subunit 1	97154.3	100252	98626.6	106944	107273	98193.4
A6NCM1	A6NCM1	IQCAL_HUMAN	IQCA1L	IQ and AAA domain-containing protein 1-like	933.203	2123.21	2249.93	1596.34	1176.45	764.444
A6NDU8	A6NDU8	RIMC1_HUMAN	RIMOC1	RAB7A-interacting MON1-CCZ1 complex subunit 1	3868.75	4653.54	2838.75	3327.24	4329.47	4094.42
A6NED2	A6NED2	RCCD1_HUMAN	RCCD1	RCC1 domain-containing protein 1	10584.2	11832	10281.8	11777.1	14089.9	12890.4
A6NFI3	A6NFI3	ZN316_HUMAN	ZNF316	Zinc finger protein 316			1387.19		1027.45	1966.52
A6NFY7	A6NFY7	SDHF1_HUMAN	SDHAF1	Succinate dehydrogenase assembly factor 1, mitochondrial	3471.57	1868.19	2286.42		2377.7	3715.88
A6NGB9	A6NGB9	WIPF3_HUMAN	WIPF3	WAS/WASL-interacting protein family member 3						392.067
A6NHL2;A6NHL2-2	A6NHL2;A6NHL2-2	TBAL3_HUMAN	TUBAL3	Tubulin alpha chain-like 3	3635.65	3929.27	4699.35	6174.62	2221.17	3573.02
A6NHR9	A6NHR9;A6NHR9-2	SMHD1_HUMAN	SMCHD1	Structural maintece of chromosomes flexible hinge domain-containing protein 1	26346.4	25566.1	26985.9	30745	31776.9	30119.1
A6NHX0	A6NHX0	CAST2_HUMAN	CASTOR2	Cytosolic arginine sensor for mTORC1 subunit 2	3541.02	4083.14	4835.6	3373.19	4111.9	3088.58
A6NJ78	A6NJ78;A6NJ78-2	MET15_HUMAN	METTL15	12S rRNA N4-methylcytidine (m4C) methyltransferase	9787.85	8709.06	10006.8	9401.62	8804.29	10977.9
A6NKF1	A6NKF1;A6NKF1-2	SAC31_HUMAN	SAC3D1	SAC3 domain-containing protein 1	4704.71	3070.67	2357.73	3177.27	4840.37	6031.66
A6NNY8	A6NNY8	UBP27_HUMAN	USP27X	Ubiquitin carboxyl-terminal hydrolase 27		1713.84	1765.58	3763.4	4925.04	2965.53
A6ZKI3;Q17RB0	A6ZKI3;Q17RB0;Q9BWD3	RTL8B_HUMAN;RTL8C_HUMAN	RTL8B;RTL8C	Retrotransposon Gag-like protein 8C	4288.91	4159.07	6031.93	4734.78	6066.4	5529.09
A7E2V4;A7E2V4-3;A7E2V4-4;A7E2V4-5	A7E2V4;A7E2V4-2;A7E2V4-3;A7E2V4-4;A7E2V4-5	ZSWM8_HUMAN	ZSWIM8	Zinc finger SWIM domain-containing protein 8	8794.56	9186.94	9117.84	9438.73	8984.51	9151.39
A7E2Y1	A7E2Y1	MYH7B_HUMAN	MYH7B	Myosin-7B	3588.77					7210.75
A7KAX9	A7KAX9;O14559;Q7Z6I6;A7KAX9-2;A7KAX9-3;O14559-10;O14559-11;Q7Z6I6-2;Q7Z6I6-3;Q7Z6I6-4	RHG32_HUMAN	ARHGAP32	Rho GTPase-activating protein 32	1654.42	1925.13		1790.89	1625.1	1269.57
A7XYQ1	A7XYQ1	SOBP_HUMAN	SOBP	Sine oculis-binding protein homolog	713.122	597.104	492.214	927.27	1197.45	471.701
A8MWD9;P62308	P62308;A8MWD9	RUXGL_HUMAN;RUXG_HUMAN	SNRPG;SNRPGP15	Putative small nuclear ribonucleoprotein G-like protein 15	29723.2	26994.5	28921.3	27567	27872.5	33282.9
A9QM74	A9QM74	IMA8_HUMAN	KPNA7	Importin subunit alpha-8	87916.7		127527	109281	130556
A9Z1Z3	A9Z1Z3;A9Z1Z3-2	FR1L4_HUMAN	FER1L4	Fer-1-like protein 4	7572.6	5730.68	5858.71	6598.34		7312.64
B2RTY4;B2RTY4-2;B2RTY4-4;B2RTY4-5	B2RTY4;B2RTY4-2;B2RTY4-4;B2RTY4-5	MYO9A_HUMAN	MYO9A	Unconventional myosin-IXa	12379.5	12075.3	11996	11417.4	10585.1	11844.2
C4AMC7;Q6VEQ5	C4AMC7;Q6VEQ5	WASH2_HUMAN;WASH3_HUMAN	WASH2P;WASH3P	Putative WAS protein family homolog 3	6343.59		5580.02	5864.22	6586.88	7147.78
E9PAV3;E9PAV3-2;Q13765	Q13765;E9PAV3;E9PAV3-2	NACAM_HUMAN;NACA_HUMAN	NACA	Nascent polypeptide-associated complex subunit alpha, muscle-specific form	64949.1	57852.5	58062.8	58944.9	55512.3	56223.4
E9PRG8	E9PRG8	CK098_HUMAN	C11orf98	Uncharacterized protein C11orf98		2846.47	2606.02	3175.54	4916.96	3843.8
O00116	O00116	ADAS_HUMAN	AGPS	Alkyldihydroxyacetonephosphate synthase, peroxisomal	33131.4	34878.3	32962.8	34430.3	36320.3	29998.7
O00139-2	O00139;O00139-1;O00139-2;O00139-4;O00139-5	KIF2A_HUMAN	KIF2A	Isoform 2 of Kinesin-like protein KIF2A	17427.8	17298.7	17758.6	19747.3	20280.5	20514.4
O00148	O00148;Q13838;Q13838-2	DX39A_HUMAN	DDX39A	ATP-dependent RNA helicase DDX39A	420938	526103	465061	460280	418107	401780
O00151	O00151	PDLI1_HUMAN	PDLIM1	PDZ and LIM domain protein 1				3411.07	4853.01	3944
O00154;O00154-4;O00154-6;O00154-7	O00154;O00154-4;O00154-2;O00154-3;O00154-5;O00154-6;O00154-7	BACH_HUMAN	ACOT7	Cytosolic acyl coenzyme A thioester hydrolase	140537	120833	125698	131405	135064	135523
O00159;O00159-2;O00159-3	O00159;O00159-3;O00159-2	MYO1C_HUMAN	MYO1C	Unconventional myosin-Ic	19109.4	18235.4	20249.9	19333.1	18128.3	20236.4
O00165;O00165-2;O00165-3;O00165-5	O00165;O00165-2;O00165-3;O00165-5	HAX1_HUMAN	HAX1	HCLS1-associated protein X-1	10391.7	9707.29	10614.8	9443.16	10965.8	10112.7
O00170	O00170	AIP_HUMAN	AIP	AH receptor-interacting protein	62351.2	54181.6	62390.4	54005.7	56222.4	63669.6
O00178	O00178	GTPB1_HUMAN	GTPBP1	GTP-binding protein 1	146583	134097	138785	157273	163414	143154
O00186	O00186	STXB3_HUMAN	STXBP3	Syntaxin-binding protein 3	12312	12198.4	12450.9	13506.8	14037.9	12978.6
O00189	O00189	AP4M1_HUMAN	AP4M1	AP-4 complex subunit mu-1	5195.94	4622.46	3560.11	4087.27	4829.07	4927.85
O00193	O00193	SMAP_HUMAN	SMAP	Small acidic protein	719.105	1429.33		514.622	317.492	578.758
O00203;O00203-3	O00203;Q13367;O00203-3;Q13367-3;Q13367-4	AP3B1_HUMAN	AP3B1	AP-3 complex subunit beta-1	43834.7	51525.3	51952.9	54844.3	50296.9	52903.8
O00213;O00213-2	O00213;Q92870;Q92870-2;O00213-2;O00213-3;O00213-4;O00213-5;O00213-6;Q92870-4	APBB1_HUMAN	APBB1	Amyloid beta precursor protein binding family B member 1	22802.5	23443.4	19740.6	21079.5	26499	19828.9
O00217	O00217	NDUS8_HUMAN	NDUFS8	NADH dehydrogenase [ubiquinone] iron-sulfur protein 8, mitochondrial	15441.3	11442.3	13935.2	12456.5	12392.1	14225.5
O00231;O00231-2	O00231;O00231-2	PSD11_HUMAN	PSMD11	26S proteasome non-ATPase regulatory subunit 11	162936	149896	153517	167600	168921	164870
O00232	O00232;O00232-2	PSD12_HUMAN	PSMD12	26S proteasome non-ATPase regulatory subunit 12	144085	151163	143100	149240	148157	145063
O00233	O00233;O00233-2	PSMD9_HUMAN	PSMD9	26S proteasome non-ATPase regulatory subunit 9	9684.29	7207.06	9237.16	9532.8	10217.5	12232.8
O00255	O00255;O00255-1;O00255-3	MEN1_HUMAN	MEN1	Menin	10079.6	12628	10087.3	12636.4	13610.6	14501.6
O00264	O00264	PGRC1_HUMAN	PGRMC1	Membrane-associated progesterone receptor component 1		2466.72	3395.38	1784.62	3881.98	3022.8
O00267;O00267-2	O00267;O00267-2	SPT5H_HUMAN	SUPT5H	Transcription elongation factor SPT5	14527	12029.1	14567.2	13474.6	13915.7	17442.5
O00268	O00268	TAF4_HUMAN	TAF4	Transcription initiation factor TFIID subunit 4	19495.9	24508.1	19995.3	21118.8	19535.7	16900.6
O00291	O00291;O00291-3;O00291-4	HIP1_HUMAN	HIP1	Huntingtin-interacting protein 1	21578.9	20085.9	23277	22131.2	23030.9	21556.5
O00299	O00299	CLIC1_HUMAN	CLIC1	Chloride intracellular channel protein 1	40048.9	56946.5	47701.7	41240.3	36327.4	39104.8
O00303	O00303	EIF3F_HUMAN	EIF3F	Eukaryotic translation initiation factor 3 subunit F	35961.6	37647.8	39708	39574.3	39569.7	38597.4
O00308;O00308-2	O00308;O00308-2;O00308-4	WWP2_HUMAN	WWP2	NEDD4-like E3 ubiquitin-protein ligase WWP2	2080.07	1464.02	2748.5	1883.13	2042.75	2095.44
O00311	O00311	CDC7_HUMAN	CDC7	Cell division cycle 7-related protein kinase	4579.81	4361.48	4541.04	3457.7	3244.93	3958.67
O00330;O00330-3	O00330;O00330-2;O00330-3	ODPX_HUMAN	PDHX	Pyruvate dehydrogenase protein X component, mitochondrial	25706.2	24265.5	23452.4	26747	28893.3	33035.1
O00399	O00399	DCTN6_HUMAN	DCTN6	Dynactin subunit 6	6446.49	5694.3	7350.4	6325.91	7020.13	7093.24
O00401	O00401	WASL_HUMAN	WASL	Actin nucleation-promoting factor WASL	6422.67	5349.34	6868.56	7946.86	7716.69	7368.06
O00410;O00410-3	O00410;O00410-2;O00410-3	IPO5_HUMAN	IPO5	Importin-5	365206	398330	416460	370702	372792	365130
O00411	O00411	RPOM_HUMAN	POLRMT	DNA-directed RNA polymerase, mitochondrial	12042.1	11261.2	11134.5	11304.3	12236	12530.2
O00418	O00418	EF2K_HUMAN	EEF2K	Eukaryotic elongation factor 2 kinase	6621.75	5734.13	6281.67	7142.4	6669.03	7764.32
O00422;O00422-2	O00422;O00422-2	SAP18_HUMAN	SAP18	Histone deacetylase complex subunit SAP18	14562.5	15205.8	12370.4	11983.4	14244.8	11754.9
O00425	O00425	IF2B3_HUMAN	IGF2BP3	Insulin-like growth factor 2 mRNA-binding protein 3	317375	326782	331216	367987	391539	395383
O00429-3	O00429;O00429-2;O00429-3;O00429-4;O00429-5;O00429-6;O00429-7;O00429-8;O00429-9	DNM1L_HUMAN	DNM1L	Isoform 2 of Dynamin-1-like protein	69154.4	67725	71453.9	68068.1	67595	60972
O00442	O00442;O00442-2	RTCA_HUMAN	RTCA	RNA 3'-terminal phosphate cyclase	24170.6	21410.5	23822.4	18730.5	20161.5	19148.2
O00443	O00443;O00443-2	P3C2A_HUMAN	PIK3C2A	Phosphatidylinositol 4-phosphate 3-kinase C2 domain-containing subunit alpha	8807.82	9816.63	9339.16	9225.78	6962.47	9647.26
O00444;O00444-2;O00444-3	O00444;O00444-2;O00444-3	PLK4_HUMAN	PLK4	Serine/threonine-protein kinase PLK4	1976.99	2270.2	1517.77	2222.75	2227.22	1826.58
O00459	O00459	P85B_HUMAN	PIK3R2	Phosphatidylinositol 3-kinase regulatory subunit beta	11782.9	9976.4	10085.6	10394.8	10620.9	12315.8
O00461	O00461	GOLI4_HUMAN	GOLIM4	Golgi integral membrane protein 4	12777.9		13333.9	13425.9		13549.8
O00468-6	O00468;O00468-2;O00468-3;O00468-4;O00468-5;O00468-6;O00468-7	AGRIN_HUMAN	AGRN	Isoform 6 of Agrin	25969.2	24714.2	24268.5	24565.1	25639.5	25118.1
O00469-2	O00469;O00469-2	PLOD2_HUMAN	PLOD2	Isoform 2 of Procollagen-lysine,2-oxoglutarate 5-dioxygenase 2	27385.4	26947.7	27251	28627.7	30028	30454.4
O00470;O00470-2	O00470;O14770;O14770-4;Q99687;Q99687-3;A6NDR6;O14770-2;O14770-3;O14770-6;O14770-7;O14770-8;Q99687-2;O00470-2	MEIS1_HUMAN	MEIS1	Homeobox protein Meis1	8401.76	7130.31	7186.88	7104.47		9509.57
O00471	O00471	EXOC5_HUMAN	EXOC5	Exocyst complex component 5	26051.7	26444	27928.3	25182.3	28102.3	24560
O00483	O00483	NDUA4_HUMAN	NDUFA4	Cytochrome c oxidase subunit NDUFA4	7649.21	14192.8	14111.5	7913.59	10568.6	8599.22
O00487	O00487	PSDE_HUMAN	PSMD14	26S proteasome non-ATPase regulatory subunit 14	53756.5	47860.7	50918.2	46710.4	49198.1	58554.8
O00499;O00499-10;O00499-11;O00499-2;O00499-3;O00499-4;O00499-5;O00499-6;O00499-7;O00499-8;O00499-9	O00499;O00499-10;O00499-11;O00499-2;O00499-3;O00499-4;O00499-5;O00499-6;O00499-7;O00499-8;O00499-9	BIN1_HUMAN	BIN1	Myc box-dependent-interacting protein 1	884.645	1356.74	892.45	1249.34	947.683	631.248
O00505	O00505	IMA4_HUMAN	KPNA3	Importin subunit alpha-4	30865.6	32529.1	35626.8	32291.5	31259.3	28185.2
O00507	O00507;O00507-2	USP9Y_HUMAN	USP9Y	Probable ubiquitin carboxyl-terminal hydrolase FAF-Y
O00522;O00522-3	O00522;O00522-3	KRIT1_HUMAN	KRIT1	Krev interaction trapped protein 1	1948.52	2063.64	2342.69	2404.2	1719.68	1243.86
O00534	O00534	VMA5A_HUMAN	VWA5A	von Willebrand factor A domain-containing protein 5A		5391.18	6084.39	7233.66
O00541;O00541-2	O00541;O00541-2	PESC_HUMAN	PES1	Pescadillo homolog	31704	32730.8	37576.6	38003.5	34761.3	38614
O00555-3;O00555-4	O00555-3;O00555-4	CAC1A_HUMAN	CACNA1A	Isoform 3 of Voltage-dependent P/Q-type calcium channel subunit alpha-1A	1777.65	2485.93	2101.99	2142.46	2607.49	2659.84
O00560-2	O00560-2	SDCB1_HUMAN	SDCBP	Isoform 2 of Syntenin-1	14832.7	13248.3	13136.4	14541.7	14036	13444.6
O00560;O00560-3	O00560;O00560-2;O00560-3	SDCB1_HUMAN	SDCBP	Syntenin-1	38205.8	40264	42535.5	50348.3	42913	48607.5
O00562;O00562-2	O00562;O00562-2	PITM1_HUMAN	PITPNM1	Membrane-associated phosphatidylinositol transfer protein 1	7596.47	5325.2	5121.99	7189.3	6935.09	5870.89
O00567	O00567	NOP56_HUMAN	NOP56	Nucleolar protein 56	27991.6	30810.8	22646.2	22962.3	25404	24770.1
O00571	O00571;O15523;O00571-2;O15523-2;O15523-3	DDX3X_HUMAN	DDX3X	ATP-dependent RNA helicase DDX3X	158723	165243	182958	172374	169700	185671
O00584	O00584	RNT2_HUMAN	RNASET2	Ribonuclease T2	2307.4		3144.69	1666.12	1957.09	2521.26
O00625	O00625	PIR_HUMAN	PIR	Pirin	2707.61	3568.83	2984.89	3397.73	2627.33	2752.73
O00629	O00629	IMA3_HUMAN	KPNA4	Importin subunit alpha-3	39002.3	34520.1	39955	38105.1	35566.2	42868.2
O00635	O00635	TRI38_HUMAN	TRIM38	E3 ubiquitin-protein ligase TRIM38	9403.25	9091.7	8783.1	7925.25	10188.9	9808.37
O00716	O00716;O00716-2	E2F3_HUMAN	E2F3	Transcription factor E2F3	882.018	727.961	1037.8	397.497	751.675	718.194
O00743;O00743-2	O00743;O00743-2	PPP6_HUMAN	PPP6C	Serine/threonine-protein phosphatase 6 catalytic subunit	10112.2	11679	11027.9	10786.6	12262.5	11482.6
O00746	O00746	NDKM_HUMAN	NME4	Nucleoside diphosphate kinase, mitochondrial	7707.3	7410.85	7315.26	6691.83	7027.5	7979.77
O00750	O00750	P3C2B_HUMAN	PIK3C2B	Phosphatidylinositol 4-phosphate 3-kinase C2 domain-containing subunit beta	4728.54	4666.21	5290.44	5025.44	5076.48	5609.75
O00763;O00763-2	O00763;O00763-2;O00763-3	ACACB_HUMAN	ACACB	Acetyl-CoA carboxylase 2			6858.93
O00764	O00764;O00764-3	PDXK_HUMAN	PDXK	Pyridoxal kinase	4546.23	4163.34	4477.73	4112.7	5279.62	4614.6
O14497	O14497;O14497-2;O14497-3	ARI1A_HUMAN	ARID1A	AT-rich interactive domain-containing protein 1A	8301.31	7451.14	6837.16	8091.32	7742.27	8322.4
O14508	O14508	SOCS2_HUMAN	SOCS2	Suppressor of cytokine signaling 2	1184.76	782.346	603.615	1038.02	1398.02	1119.09
O14530;O14530-2	O14530;O14530-2	TXND9_HUMAN	TXNDC9	Thioredoxin domain-containing protein 9	19264.1	19438.6	20258.5	20567.7	19347.9	21292.4
O14531	O14531	DPYL4_HUMAN	DPYSL4	Dihydropyrimidinase-related protein 4	28883.8	25469.5	26355.4	31398.3	28988.7	39531.7
O14544	O14544	SOCS6_HUMAN	SOCS6	Suppressor of cytokine signaling 6	9279.85	8189.95	16765.3	12212.5	12206.3	10417.7
O14545	O14545;O14545-2	TRAD1_HUMAN	TRAFD1	TRAF-type zinc finger domain-containing protein 1	6945.58	5266.41	5854.18	5732.4	7487.28	6909.25
O14561	O14561	ACPM_HUMAN	NDUFAB1	Acyl carrier protein, mitochondrial	3290.85	3658.86	3965.68	4627.42	3139.69	3184.99
O14562	O14562	UBFD1_HUMAN	UBFD1	Ubiquitin domain-containing protein UBFD1	20488.7	13279	16772.3	19247.8	21132.2	20883.1
O14578-4	O14578;O14578-3;O14578-4	CTRO_HUMAN	CIT	Isoform 4 of Citron Rho-interacting kinase	12334.6	8981.89	10308.2	10584.4	9914.88	10992
O14579	O14579;O14579-2	COPE_HUMAN	COPE	Coatomer subunit epsilon	4107.62	5204.3	6393.64	3672.52	3890.51	5083.87
O14602;P47813	P47813;O14602	IF1AX_HUMAN;IF1AY_HUMAN	EIF1AX;EIF1AY	Eukaryotic translation initiation factor 1A, Y-chromosomal	5113.78	3463.75	2730.1	3276.38	3882.34	3248.9
O14617-5	O14617;O14617-2;O14617-3;O14617-4;O14617-5	AP3D1_HUMAN	AP3D1	Isoform 5 of AP-3 complex subunit delta-1	25344	31502.3	25719.3	29787.5	30187	29723.6
O14618	O14618	CCS_HUMAN	CCS	Copper chaperone for superoxide dismutase		598.209
O14628;O14628-4;O14628-5;O14628-6;O14628-7	O14628;O14628-4;O14628-5;O14628-6;O14628-7	ZN195_HUMAN	ZNF195	Zinc finger protein 195	1898.77	1247.17	978.07	1137.43	1057.82	2165.4
O14640-2	O14640-2	DVL1_HUMAN	DVL1	Isoform 2 of Segment polarity protein dishevelled homolog DVL-1	5935.34	6193.35	5307.35	6331.01	6778.79	7700.59
O14641	O14641	DVL2_HUMAN	DVL2	Segment polarity protein dishevelled homolog DVL-2	24058	22972.1	23995	25064.6	24043.3	22592.2
O14646;O14646-2	O14646;O14646-2	CHD1_HUMAN	CHD1	Chromodomain-helicase-DNA-binding protein 1	4974.11	3340.79	3838.61	3470.45	4349.04	3209.87
O14656	O14656	TOR1A_HUMAN	TOR1A	Torsin-1A	7280.67	11159.1	8127.18	8374.26	9444.91	8721.27
O14672	O14672	ADA10_HUMAN	ADAM10	Disintegrin and metalloproteinase domain-containing protein 10	9937.45	5973.75			6961.23	3893.44
O14686;O14686-3	O14686;O14686-3	KMT2D_HUMAN	KMT2D	Histone-lysine N-methyltransferase 2D	3588.63	3886.88	3859.64	3313.99	4856.07	7572.14
O14717	O14717;O14717-2;O14717-3;O14717-4;O14717-5;O14717-6	TRDMT_HUMAN	TRDMT1	tRNA (cytosine(38)-C(5))-methyltransferase	8531.91	5884.14	6250.04	5947.62	6917.3	8021.49
O14727;O14727-4	O14727;O14727-2;O14727-3;O14727-4;O14727-5;O14727-6	APAF_HUMAN	APAF1	Apoptotic protease-activating factor 1	12945.4	14936.3	13342.6	11083.2	12566.6	12417.1
O14730;O14730-2	O14730;O14730-2	RIOK3_HUMAN	RIOK3	Serine/threonine-protein kinase RIO3	7792.17	8403.95	8794.28	8026.47	6135.33	6612.79
O14733;O14733-2;O14733-3	O14733;O14733-2;O14733-3;O14733-4	MP2K7_HUMAN	MAP2K7	Dual specificity mitogen-activated protein kinase kinase 7	14502.5	13998.7	12013.7	13295.5	14284.3	16037.9
O14734	O14734	ACOT8_HUMAN	ACOT8	Acyl-coenzyme A thioesterase 8	34094.8	31846.9	36082.4	33769.5	25956.3	35172
O14735;O14735-3	O14735;O14735-3	CDIPT_HUMAN	CDIPT	CDP-diacylglycerol--inositol 3-phosphatidyltransferase	3115.42	3717.49	3384.47	4552.35	3255.25	4008.15
O14744	O14744;O14744-2;O14744-3;O14744-4;O14744-5	ANM5_HUMAN	PRMT5	Protein arginine N-methyltransferase 5	56411.7	53599.9	47132.2	50506.6	55291.1	47983.7
O14757	O14757;O14757-2;O14757-3	CHK1_HUMAN	CHEK1	Serine/threonine-protein kinase Chk1	34529.9	36984.3	35668.9	37100.4	38138.3	33932.1
O14773;O14773-2	O14773;O14773-2	TPP1_HUMAN	TPP1	Tripeptidyl-peptidase 1	3523.32	5352.63	6971.81	7232.45	6881.25	12186.4
O14776;O14776-2	O14776;O14776-2	TCRG1_HUMAN	TCERG1	Transcription elongation regulator 1	20240.5	17271.2	19189.9	20279.2	18809.4	20624.1
O14777	O14777	NDC80_HUMAN	NDC80	Kinetochore protein NDC80 homolog	20744.2	16743.4	18282.5	18086.9	20678.3	20944.6
O14787-2	O14787;O14787-2	TNPO2_HUMAN	TNPO2	Isoform 2 of Transportin-2	14613	19096.3	15999.9	16318.1	14034.7	13300.6
O14795;O14795-2	O14795;O14795-2	UN13B_HUMAN	UNC13B	Protein unc-13 homolog B	14665.2	13798.6	13698.1	15433.7	14310.1	12722
O14802	O14802	RPC1_HUMAN	POLR3A	DNA-directed RNA polymerase III subunit RPC1	10248.5	8658.55	10335.6	11114.5	12687.9	12146.7
O14818	O14818;O14818-2	PSA7_HUMAN	PSMA7	Proteasome subunit alpha type-7	57207.9	48004.4	47894.6	53045.4	57092.7	57484.6
O14828	O14828;O14828-2	SCAM3_HUMAN	SCAMP3	Secretory carrier-associated membrane protein 3	5401.69	5936.31	5656.09	5862.81	5788.76	5362.75
O14832	O14832;O14832-2	PAHX_HUMAN	PHYH	Phytanoyl-CoA dioxygenase, peroxisomal	5916.33	4264.04	6930.84	8468	5159.55	7858.56
O14867	O14867	BACH1_HUMAN	BACH1	Transcription regulator protein BACH1	1898.62	1466.76	1760.39	1656.31	2537.32	2367.26
O14874-2;O14874-3	O14874;O14874-2;O14874-3	BCKD_HUMAN	BCKDK	Isoform 2 of [3-methyl-2-oxobutanoate dehydrogenase [lipoamide]] kinase, mitochondrial	7078.4	8176.46	7877.27	5143.67	5573.57	5940.92
O14879	O14879	IFIT3_HUMAN	IFIT3	Interferon-induced protein with tetratricopeptide repeats 3	9837.66	8553.92	8846.58	8187.46	8978.51	8855.58
O14908	O14908;O14908-2;Q8TF64	GIPC1_HUMAN	GIPC1	PDZ domain-containing protein GIPC1	5316.85	3164.64	6631.17	5177.52	6273.61	6456.38
O14910	O14910	LIN7A_HUMAN	LIN7A	Protein lin-7 homolog A	8052.68	6249.28	8107.53	7852.33	9212.66	7943.98
O14920	O14920;O14920-3	IKKB_HUMAN	IKBKB	Inhibitor of nuclear factor kappa-B kinase subunit beta	9450.38	7735.28	9316.31	8571.55	10029.5	9230.91
O14925	O14925;Q5SRD1;Q5SRD1-2	TIM23_HUMAN	TIMM23	Mitochondrial import inner membrane translocase subunit Tim23	3900.82	4151.94	3323.41	3893.78	2176.84	2957.21
O14929	O14929;O14929-2	HAT1_HUMAN	HAT1	Histone acetyltransferase type B catalytic subunit	36188.9	45416	50316.5	39640.1	36943.6	52766.1
O14933	O14933	UB2L6_HUMAN	UBE2L6	Ubiquitin/ISG15-conjugating enzyme E2 L6	5884.62	6120.29	6263.97	6169.37	6683.91	6349.91
O14936;O14936-3	O14936;O14936-4;O14936-2;O14936-3;O14936-5;O14936-6	CSKP_HUMAN	CASK	Peripheral plasma membrane protein CASK	12751.9	10373.2	13185.7	13771.2	10009	18578.4
O14939;O14939-4	O14939;O14939-3;O14939-4	PLD2_HUMAN	PLD2	Phospholipase D2		2901.92	2681.83	5131.16	2547.63	3633.65
O14950;P19105	O14950;P19105	ML12A_HUMAN;ML12B_HUMAN	MYL12A;MYL12B	Myosin regulatory light chain 12B	5223.85	5200.05	4446.02	3938.16	5757.01	3589.15
O14964	O14964;O14964-2	HGS_HUMAN	HGS	Hepatocyte growth factor-regulated tyrosine kinase substrate	14475.3	11965.4	12460.1	13623.4	18457	16106.9
O14965	O14965	AURKA_HUMAN	AURKA	Aurora kinase A	6973.37	8049.71	7919.45	6539.88	7132.1	8444.35
O14966	O14966	RAB7L_HUMAN	RAB29	Ras-related protein Rab-7L1	3481.03	5510.66	4824.22	3873.17	4552.87	3605.54
O14972	O14972;O14972-2	VP26C_HUMAN	VPS26C	Vacuolar protein sorting-associated protein 26C	4458.8	4141.37	4949.19	4767.22	5490.29	3797.57
O14974;O14974-3;O14974-4;O14974-5	O14974;O14974-2;O14974-3;O14974-4;O14974-5	MYPT1_HUMAN	PPP1R12A	Protein phosphatase 1 regulatory subunit 12A	143.436				179.309	478.022
O14975;O14975-2	O14975;O14975-2	S27A2_HUMAN	SLC27A2	Long-chain fatty acid transport protein 2	1931.56	1443.43	1815.97	1831.06	1999.26	1666.35
O14976	O14976;O14976-2	GAK_HUMAN	GAK	Cyclin-G-associated kinase	29480.7	24788.3	25012.9	28446.8	30101.5	27344.2
O14979;O14979-2;O14979-3	O14979;O14979-2;O14979-3	HNRDL_HUMAN	HNRNPDL	Heterogeneous nuclear ribonucleoprotein D-like	423.11	480.134		708.735		1064.12
O14980	O14980	XPO1_HUMAN	XPO1	Exportin-1	121371	139008	146089	129076	119276	121044
O14981	O14981;O14981-2	BTAF1_HUMAN	BTAF1	TATA-binding protein-associated factor 172	13487.6	14472.4	14910.7	14421.8	13529.4	14737.5
O14994	O14994	SYN3_HUMAN	SYN3	Synapsin-3	8151.76	5745.07	5429.81	7435.62	5541.15	3952.92
O15013;O15013-4;O15013-5;O15013-6;O15013-7	O15013;O15013-4;O15013-5;O15013-6;O15013-7	ARHGA_HUMAN	ARHGEF10	Rho guanine nucleotide exchange factor 10	26305.1	26108.4	26267.4	28256.8	26787.1	25885.2
O15014	O15014	ZN609_HUMAN	ZNF609	Zinc finger protein 609
O15016-2	O15016-2	TRI66_HUMAN	TRIM66	Isoform 2 of Tripartite motif-containing protein 66	7461.01	3953.45	4461.33	3309.2	4747.59	3460.35
O15020	O15020;O15020-2	SPTN2_HUMAN	SPTBN2	Spectrin beta chain, non-erythrocytic 2	16960.6	16341	15715.5	17448.2	17539.8	19233.5
O15027;O15027-2;O15027-3;O15027-4;O15027-5	O15027;O15027-2;O15027-3;O15027-4;O15027-5	SC16A_HUMAN	SEC16A	Protein transport protein Sec16A	72589.9	63628.4	66632.9	67596	67647.6	69402
O15031	O15031	PLXB2_HUMAN	PLXNB2	Plexin-B2	1085.12	901.849	507.581	880.563	2031.17	1661.45
O15037	O15037	KHNYN_HUMAN	KHNYN	Protein KHNYN	8658.47	7581.75	4623.95			7631.86
O15042;O15042-2	O15042;O15042-2;O15042-3	SR140_HUMAN	U2SURP	U2 snRNP-associated SURP motif-containing protein	21039.2	23122.6	21386.2	23181.2	23804.5	22538.9
O15047	O15047	SET1A_HUMAN	SETD1A	Histone-lysine N-methyltransferase SETD1A	16439.4	14922.9	16400.2	17085.4	16366.7	17755.6
O15056;O15056-2	O15056;O15056-2;O15056-3	SYNJ2_HUMAN	SYNJ2	Synaptojanin-2	912.128	1098.34		535.05	626.553	219.232
O15066	O15066	KIF3B_HUMAN	KIF3B	Kinesin-like protein KIF3B	24881.2	21136.2	21466.6	22172.5	24345.4	26110.4
O15067	O15067	PUR4_HUMAN	PFAS	Phosphoribosylformylglycinamidine synthase	27633.5	36846.5	29059.7	30563.6	26992.1	31568.8
O15068;O15068-10;O15068-2;O15068-3;O15068-4;O15068-5;O15068-6;O15068-8;O15068-9	O15068;O15068-10;O15068-2;O15068-3;O15068-4;O15068-5;O15068-6;O15068-8;O15068-9	MCF2L_HUMAN	MCF2L	Guanine nucleotide exchange factor DBS	417.695		312.011			462.25
O15075;O15075-2	O15075;O15075-2	DCLK1_HUMAN	DCLK1	Serine/threonine-protein kinase DCLK1	50130.1	42419.3	46750.5	52600.7	50173.7	50625.8
O15084	O15084;O15084-1;O15084-2;O15084-4	ANR28_HUMAN	ANKRD28	Serine/threonine-protein phosphatase 6 regulatory ankyrin repeat subunit A	12266.6	12981.3	11928	9472.33	11199.5	13367.6
O15085;O15085-2	O15085;O15085-2	ARHGB_HUMAN	ARHGEF11	Rho guanine nucleotide exchange factor 11	10198.8	8561.18	8674.78	8678.96	10662	7992.99
O15091;O15091-2	O15091;O15091-2;O15091-3;O15091-4	MRPP3_HUMAN	PRORP	Mitochondrial ribonuclease P catalytic subunit	45760.4	41930.1	47703.3	46261	45862.5	39622.2
O15111	O15111	IKKA_HUMAN	CHUK	Inhibitor of nuclear factor kappa-B kinase subunit alpha	10951.2	11677	12382.5	11093.9	10116.6	11871.8
O15119;O15119-2;O15119-3	O15119;O15119-3;O15119-2	TBX3_HUMAN	TBX3	T-box transcription factor TBX3	2284.11	2291	1287.14	2052.39	1739.07	2505.97
O15131	O15131	IMA6_HUMAN	KPNA5	Importin subunit alpha-6		3736.63		4681.88	2839.32	2836.76
O15143	O15143	ARC1B_HUMAN	ARPC1B	Actin-related protein 2/3 complex subunit 1B	7626.3	9679.59	7704.76	7932.25	6738.05	8121.89
O15144	O15144	ARPC2_HUMAN	ARPC2	Actin-related protein 2/3 complex subunit 2	22864.4	23980.5	20389.6	22933.1	23151.8	21463.5
O15145	O15145	ARPC3_HUMAN	ARPC3	Actin-related protein 2/3 complex subunit 3	13955.6	11214.5	12588.4	11921.7	8723.61	10986.8
O15151;O15151-4;O15151-5	O15151;O15151-4;O15151-5	MDM4_HUMAN	MDM4	Protein Mdm4	1764.61	2133.69	2993.26	1281.64	2484.23	1524.86
O15160	O15160;O15160-2	RPAC1_HUMAN	POLR1C	DNA-directed RNA polymerases I and III subunit RPAC1	31713.8	26802.9	28932.1	32188.3	31298.5	35533.4
O15164	O15164;O15164-2	TIF1A_HUMAN	TRIM24	Transcription intermediary factor 1-alpha	16780.7	15488.8	17594.4	15812.9	16077.1	16125.6
O15211	O15211;O15211-2	RGL2_HUMAN	RGL2	Ral guanine nucleotide dissociation stimulator-like 2			1050.99	1172.62	1811.57	1124.62
O15212	O15212	PFD6_HUMAN	PFDN6	Prefoldin subunit 6
O15226;O15226-2	O15226;O15226-2	NKRF_HUMAN	NKRF	NF-kappa-B-repressing factor	10217.7	10247.9	10378.5	10901.7	10074.5	11149.2
O15228;O15228-2	O15228;O15228-2	GNPAT_HUMAN	GNPAT	Dihydroxyacetone phosphate acyltransferase	4121.61	5573.4	4844.15	5268.31	4266.49	3666.43
O15230	O15230	LAMA5_HUMAN	LAMA5	Laminin subunit alpha-5	3601.73	4041.22	3812.58	4384.16	3809.09	4210.93
O15235	O15235	RT12_HUMAN	MRPS12	Small ribosomal subunit protein uS12m	11748.6	11268	12009.6	10947.9	14973.7	13669.6
O15254;O15254-2	O15254;O15254-2	ACOX3_HUMAN	ACOX3	Peroxisomal acyl-coenzyme A oxidase 3	4597.71	2827.17	2967.06	2259.73		1294.53
O15258	O15258	RER1_HUMAN	RER1	Protein RER1	4356.39	3558.93	2804.15	4335.32	2040	2114.7
O15260;O15260-2	O15260;O15260-2	SURF4_HUMAN	SURF4	Surfeit locus protein 4	19498.9	17152.2	16765.5	13385.5	13989.9	8304.97
O15269	O15269	SPTC1_HUMAN	SPTLC1	Serine palmitoyltransferase 1	5874.63	6019.37	4230.54	4630.27	4768.33	3575.46
O15270	O15270	SPTC2_HUMAN	SPTLC2	Serine palmitoyltransferase 2	4739.04	2604.91	2829.24	2696.58	1716.42	2932.67
O15287	O15287	FANCG_HUMAN	FANCG	Fanconi anemia group G protein	2033.94	2111.89	2618.21	1997.39	1773.18	2428.91
O15294;O15294-3	O15294;O15294-2;O15294-3;O15294-4	OGT1_HUMAN	OGT	UDP-N-acetylglucosamine--peptide N-acetylglucosaminyltransferase 110 kDa subunit	15138.8	13576	13368.9	14357.3	11277.4	15312.8
O15304;O15304-2	O15304;O15304-2	SIVA_HUMAN	SIVA1	Apoptosis regulatory protein Siva	3711.68	3881.04	5466.72	4848.61	5739.59	5717.23
O15344	O15344;O15344-2	TRI18_HUMAN	MID1	E3 ubiquitin-protein ligase Midline-1	7050.01	7333.14	8849.48	9145.78	8329.25	6042.27
O15350;O15350-10;O15350-11;O15350-12;O15350-13;O15350-2;O15350-3;O15350-4;O15350-5;O15350-6;O15350-8;O15350-9	O15350;O15350-10;O15350-11;O15350-12;O15350-13;O15350-2;O15350-3;O15350-4;O15350-5;O15350-6;O15350-8;O15350-9	P73_HUMAN	TP73	Tumor protein p73	3653.1	2924.83	2565.26	2147.55	3548.47	1800.1
O15355	O15355	PPM1G_HUMAN	PPM1G	Protein phosphatase 1G	15627.5	13499.2	13291.6	14070.4	14648.9	15031.3
O15357	O15357	SHIP2_HUMAN	INPPL1	Phosphatidylinositol 3,4,5-trisphosphate 5-phosphatase 2	26490.5	22649.2	23924.6	26200.1	26323.8	24293.7
O15360	O15360;O15360-3	FANCA_HUMAN	FANCA	Fanconi anemia group A protein	4145.49	3129.78	4182	3257.02	3732.08	4885.91
O15371;O15371-2;O15371-3	O15371;O15371-2;O15371-3	EIF3D_HUMAN	EIF3D	Eukaryotic translation initiation factor 3 subunit D	40561.1	41322.4	37310	36697.5	40131.2	40934.8
O15372	O15372	EIF3H_HUMAN	EIF3H	Eukaryotic translation initiation factor 3 subunit H	65790.4	57348.3	66356.5	60384.3	52208.7	80692.8
O15379;O15379-2	O15379;O15379-2	HDAC3_HUMAN	HDAC3	Histone deacetylase 3	1729.95	2269.96	2900.56	1908.92	1513.23	2004.98
O15381;O15381-2	O15381;O15381-5;O15381-2;O15381-3;O15381-4	NVL_HUMAN	NVL	Nuclear valosin-containing protein-like	11803	11375.6	10425.1	10541.8	12197	12612.9
O15397	O15397;O15397-2	IPO8_HUMAN	IPO8	Importin-8	18081.4	20013.2	20358.5	18820.6	18501.1	17535.6
O15446;O15446-2	O15446;O15446-2	RPA34_HUMAN	POLR1G	DNA-directed RNA polymerase I subunit RPA34	14583.9	13357.3	15973.7	15076.8	16973.9	16653.3
O15455	O15455	TLR3_HUMAN	TLR3	Toll-like receptor 3
O15460;O15460-2	O15460;O15460-2	P4HA2_HUMAN	P4HA2	Prolyl 4-hydroxylase subunit alpha-2	8072.29	8350.49	9388.82	9754.21	9246.2	9831.56
O15488;O15488-2;O15488-3;O15488-4;O15488-5;O15488-6	O15488;O15488-2;O15488-3;O15488-4;O15488-5;O15488-6	GLYG2_HUMAN	GYG2	Glycogenin-2	691.159	390.763	1366.78	941.866	402.509	1140.96
O15498	O15498;O15498-2	YKT6_HUMAN	YKT6	Synaptobrevin homolog YKT6	38688.2	42690.9	42851.6	39231.6	39779.2	42248.9
O15504	O15504;O15504-3	NUP42_HUMAN	NUP42	Nucleoporin NUP42	2346.08	2241.79	3356.56	3913	2913.76	4590.8
O15530;O15530-3	O15530;O15530-2;O15530-3;O15530-4	PDPK1_HUMAN	PDPK1	3-phosphoinositide-dependent protein kinase 1	10653.4	8688.11	9834.57	9614.38	9727.41	10512.6
O15550	O15550	KDM6A_HUMAN	KDM6A	Lysine-specific demethylase 6A	4881.2	5344.03	5907.87	5773.33	4867.17	5175.33
O43143	O43143;O60231;Q14562	DHX15_HUMAN	DHX15	ATP-dependent RNA helicase DHX15	32227.5	37534.5	33158.1	32945.5	28327.7	33986.9
O43148;O43148-2	O43148;O43148-2	MCES_HUMAN	RNMT	mRNA cap guanine-N7 methyltransferase	6506.47	7272.68	5928.09	6254.45	6464.38	5756.37
O43149	O43149	ZZEF1_HUMAN	ZZEF1	Zinc finger ZZ-type and EF-hand domain-containing protein 1	6498.68	7192.14	6812.58	7721.21	5585.57	7627.67
O43150	O43150;O43150-2	ASAP2_HUMAN	ASAP2	Arf-GAP with SH3 domain, ANK repeat and PH domain-containing protein 2	5837.35	5601.53	6982.39	5743.94	4547.2	5387.18
O43156	O43156	TTI1_HUMAN	TTI1	TELO2-interacting protein 1 homolog	33021.7	34367.6	35978.5	33926.5	30690.3	35885
O43159	O43159	RRP8_HUMAN	RRP8	Ribosomal RNA-processing protein 8	2882.39	2358.83	1710.68	2543.46	1583.86	2231.89
O43164;O43164-2	O43164;O43164-2	PJA2_HUMAN	PJA2	E3 ubiquitin-protein ligase Praja-2	445.358	242.2	224.891	649.789	160.076	417.898
O43169	O43169	CYB5B_HUMAN	CYB5B	Cytochrome b5 type B	2151.77	829.188			2079.98	3595.07
O43172;O43172-2	O43172;O43172-2	PRP4_HUMAN	PRPF4	U4/U6 small nuclear ribonucleoprotein Prp4	18026.3	17673.1	18302	19084.1	17335.4	16560.4
O43175	O43175	SERA_HUMAN	PHGDH	D-3-phosphoglycerate dehydrogenase	609242	583078	625967	616880	691499	652293
O43237	O43237;O43237-2	DC1L2_HUMAN	DYNC1LI2	Cytoplasmic dynein 1 light intermediate chain 2	88711	81248	84298.8	87880.8	96222.4	85734.9
O43242	O43242	PSMD3_HUMAN	PSMD3	26S proteasome non-ATPase regulatory subunit 3	53334	56390.8	55618.2	60252.2	56016.5	52540.8
O43251;O43251-10;O43251-2;O43251-5;O43251-6;O43251-8	O43251;O43251-10;O43251-2;O43251-3;O43251-5;O43251-6;O43251-8	RFOX2_HUMAN	RBFOX2	RNA binding protein fox-1 homolog 2	4369.56	4556.8	3751.35	3755.44	4408.07	4547.12
O43252	O43252	PAPS1_HUMAN	PAPSS1	Bifunctional 3'-phosphoadenosine 5'-phosphosulfate synthase 1	42957.8	42418.4	49384	42830.8	41880.2	50118
O43264	O43264	ZW10_HUMAN	ZW10	Centromere/kinetochore protein zw10 homolog	29777.6	28764.5	30357.3	28421.7	27789.5	27496.2
O43272	O43272;O43272-1;O43272-2	PROD_HUMAN	PRODH	Proline dehydrogenase 1, mitochondrial	11272.5	11605.7	11404.9	11465.9	10824.6	11832.4
O43278	O43278;O43278-2	SPIT1_HUMAN	SPINT1	Kunitz-type protease inhibitor 1	18031.3	16955.4	12976.5	16352.4	13998	14738.7
O43290	O43290	SNUT1_HUMAN	SART1	U4/U6.U5 tri-snRNP-associated protein 1	267.396	331.563	373.692		308.363	305.834
O43292;O43292-2	O43292;O43292-2	GPAA1_HUMAN	GPAA1	Glycosylphosphatidylinositol anchor attachment 1 protein	5256.47	3683.21	4286.32	1514.02		2159.88
O43299	O43299;O43299-2;O43299-3	AP5Z1_HUMAN	AP5Z1	AP-5 complex subunit zeta-1	2571.06	5514.94	5144.64	4303.78	5269.58	3696.04
O43301	O43301	HS12A_HUMAN	HSPA12A	Heat shock 70 kDa protein 12A	16025.2	14124.8	13304.6	16086.4	16949.6	18126
O43303;O43303-2	O43303;O43303-2	CP110_HUMAN	CCP110	Centriolar coiled-coil protein of 110 kDa	6949.11	8793.01	6725.24	7158.17	6734.3	6638.71
O43314;O43314-2	O43314;O43314-2	VIP2_HUMAN	PPIP5K2	Inositol hexakisphosphate and diphosphoinositol-pentakisphosphate kinase 2	17693.4	17615.7	16882.4	19380	21520.1	20524.4
O43318;O43318-2	O43318;O43318-2	M3K7_HUMAN	MAP3K7	Mitogen-activated protein kinase kinase kinase 7	2248.31	1991.09	1880.7	1553.23	1521.74	1928.35
O43324	O43324;O43324-2	MCA3_HUMAN	EEF1E1	Eukaryotic translation elongation factor 1 epsilon-1	7382.77	8324.25	9074.12	8741.37	6125.42	11206.4
O43347	O43347	MSI1H_HUMAN	MSI1	RNA-binding protein Musashi homolog 1	22415.5	22035.9	21682.1	23923.9	24534.1	21561
O43353	O43353;O43353-2	RIPK2_HUMAN	RIPK2	Receptor-interacting serine/threonine-protein kinase 2	28757.2	25233.2	25045.5	21745.8	22273.4	28080.8
O43379	O43379;O43379-4	WDR62_HUMAN	WDR62	WD repeat-containing protein 62	3518.26	3830.63	2937.2	3682.89	3377.9	3042.97
O43390	O43390;O43390-3	HNRPR_HUMAN	HNRNPR	Heterogeneous nuclear ribonucleoprotein R	23609.8	26939.3	22770.7	21884.4	23494.8	24636
O43395	O43395	PRPF3_HUMAN	PRPF3	U4/U6 small nuclear ribonucleoprotein Prp3	24018.3	21994.2	19620.6	23904.7	25548.5	27061.1
O43396	O43396	TXNL1_HUMAN	TXNL1	Thioredoxin-like protein 1	13820.5	10335.1	9553.62	13790.3	10922	10037.3
O43402	O43402	EMC8_HUMAN	EMC8	ER membrane protein complex subunit 8	2420.82	2436.73	2435.57	2884.59	1404.55
O43414;O43414-2;O43414-3	O43414;O43414-2;O43414-3	ERI3_HUMAN	ERI3	ERI1 exoribonuclease 3	3270.49	5003.54	4234.38	3704.09	4417.75	3710.43
O43422	O43422	P52K_HUMAN	THAP12	52 kDa repressor of the inhibitor of the protein kinase			680.295	1378.54		993.075
O43427;O43427-2	O43427;O43427-2	FIBP_HUMAN	FIBP	Acidic fibroblast growth factor intracellular-binding protein	7651.4	6976.56	5472.26	6527.03	6301.84	7267.78
O43432;O43432-3	O43432;O43432-3;O43432-4	IF4G3_HUMAN	EIF4G3	Eukaryotic translation initiation factor 4 gamma 3	126845	118172	114929	123483	138063	107676
O43447;O43447-2	O43447;O43447-2	PPIH_HUMAN	PPIH	Peptidyl-prolyl cis-trans isomerase H	11763.1	9868.48	8053.19	9620.61	10325.3	8040.64
O43464;O43464-3	O43464;P83110;O43464-2;O43464-3;P83110-2	HTRA2_HUMAN	HTRA2	Serine protease HTRA2, mitochondrial	7085		7181.45		3228.92
O43474;O43474-1;O43474-4	O43474;O43474-1;O43474-4	KLF4_HUMAN	KLF4	Krueppel-like factor 4	8897.85	6894.94	7712.39	9540.12	8866.51	11191.2
O43482	O43482	MS18B_HUMAN	OIP5	Protein Mis18-beta	30722.6	26852.3	32620.7	31894.8	34257	35257.9
O43488	O43488	ARK72_HUMAN	AKR7A2	Aflatoxin B1 aldehyde reductase member 2	25232.8	21812.9	30600.8	23867.3	22413.5	33587.9
O43491-4	O43491;O43491-2;O43491-3;O43491-4	E41L2_HUMAN	EPB41L2	Isoform 4 of Band 4.1-like protein 2	55303.7	56923.8	57003.4	57596	55823.5	60815.5
O43502	O43502;O43502-2	RA51C_HUMAN	RAD51C	DNA repair protein RAD51 homolog 3	15355.9	14418.2	16272	16312.9	15059	15124.3
O43524;O43524-2	O43524;O43524-2	FOXO3_HUMAN	FOXO3	Forkhead box protein O3	961.046		382.29	150.15	513.314	571.586
O43542	O43542	XRCC3_HUMAN	XRCC3	DNA repair protein XRCC3	20733.8	21448	20711.5	20032.5	18655.6	22909.9
O43572	O43572	AKA10_HUMAN	AKAP10	A-kinase anchor protein 10, mitochondrial	19788.2	18854.3	18262.1	20287.5	20514.7	20917.5
O43592	O43592	XPOT_HUMAN	XPOT	Exportin-T	33406.9	38679.7	35142.9	36399.8	33260.5	30958.8
O43615	O43615	TIM44_HUMAN	TIMM44	Mitochondrial import inner membrane translocase subunit TIM44	55637.2	57003.2	56158	57766.9	56301.3	57245.2
O43617;O43617-2	O43617;O43617-2	TPPC3_HUMAN	TRAPPC3	Trafficking protein particle complex subunit 3	7267.53	5971.91	6679.29	7434.39	6995.14	7160.13
O43633	O43633	CHM2A_HUMAN	CHMP2A	Charged multivesicular body protein 2a	12783.4	8713.9	11704.7	9112.39	9862.68	10592.8
O43663;O43663-4	O43663;O43663-2;O43663-3;O43663-4	PRC1_HUMAN	PRC1	Protein regulator of cytokinesis 1	16722.5	14950.6	17757.7	15908.7	23310.5	17726.7
O43670;O43670-2;O43670-4	O43670;O43670-2;O43670-4	ZN207_HUMAN	ZNF207	BUB3-interacting and GLEBS motif-containing protein ZNF207	3425.38	4708.98	4478.38	3745.46	3112.49	2857.6
O43676	O43676	NDUB3_HUMAN	NDUFB3	NADH dehydrogenase [ubiquinone] 1 beta subcomplex subunit 3	1333.02	1526.66	1447.1	1692.68	893.504	1974.57
O43679;O43679-2;O43679-3	O43679;O43679-2;O43679-3	LDB2_HUMAN	LDB2	LIM domain-binding protein 2	4772.87	4873.32	6634.83	3904.28	5490.46	5196.54
O43681	O43681	GET3_HUMAN	GET3	ATPase GET3	28438.2	27767.9	29259.8	33542.5	28797.5	28939.6
O43683;O43683-2;O43683-3	O43683;O43683-2;O43683-3	BUB1_HUMAN	BUB1	Mitotic checkpoint serine/threonine-protein kinase BUB1	13858.5	10678.8	12677.2	10440.1	11521	12799.7
O43684;O43684-2	O43684;O43684-2	BUB3_HUMAN	BUB3	Mitotic checkpoint protein BUB3	62042	64655.3	60744.6	63439.2	65172.1	63902.9
O43707	O43707;O43707-2	ACTN4_HUMAN	ACTN4	Alpha-actinin-4	19413.5	19561.3	18957.1	19214	12774.2	17458.8
O43708;O43708-2;O43708-3	O43708;O43708-2;O43708-3	MAAI_HUMAN	GSTZ1	Maleylacetoacetate isomerase	2528.59		3719.73	1776.14	2545.79	2461.28
O43719	O43719	HTSF1_HUMAN	HTATSF1	HIV Tat-specific factor 1	5632.16	5827.07	4146.94	5497.74	6112.41	4588.74
O43739;O43739-2	O43739;O43739-2	CYH3_HUMAN	CYTH3	Cytohesin-3	11814.1	13268.1	13996.4	15278.2	13133.4	14865.7
O43741	O43741	AAKB2_HUMAN	PRKAB2	5'-AMP-activated protein kinase subunit beta-2	3461.61	3120.4	3819.72	3443.51	3278.27	2424.58
O43747	O43747;O43747-2	AP1G1_HUMAN	AP1G1	AP-1 complex subunit gamma-1	66117.3	71818.4	79109.3	63199.5	60345.8	59494.4
O43765	O43765	SGTA_HUMAN	SGTA	Small glutamine-rich tetratricopeptide repeat-containing protein alpha	1653.59	988.673	1591.51	1133.27	1832.71	1279.37
O43766	O43766;O43766-3	LIAS_HUMAN	LIAS	Lipoyl synthase, mitochondrial	5291.32	1980.01	2830.69	4367.64	5646.72	3334.19
O43772	O43772	MCAT_HUMAN	SLC25A20	Mitochondrial carnitine/acylcarnitine carrier protein	5906.79	4321.84	5298.72	3072.32
O43776	O43776;O43776-2	SYNC_HUMAN	NARS1	Asparagine--tRNA ligase, cytoplasmic	18054.1	23562.8	16881.7	19285.3	15871.8	16693.7
O43790	O43790;Q14533	KRT86_HUMAN	KRT86	Keratin, type II cuticular Hb6				4867.39	10886.4
O43795	O43795;O43795-2	MYO1B_HUMAN	MYO1B	Unconventional myosin-Ib	37798.7	40127.1	39744.5	41739.2	40004.9	40997.7
O43809	O43809	CPSF5_HUMAN	NUDT21	Cleavage and polyadenylation specificity factor subunit 5	37131.6	43893.4	41311.5	35643.4	33348.7	43268.5
O43813	O43813	LANC1_HUMAN	LANCL1	Glutathione S-transferase LANCL1	3977.4		5746.63	4638.22	6344.11	3177.87
O43815	O43815;O43815-2	STRN_HUMAN	STRN	Striatin	9102.92		3695.93	5878.58	5043.81	6976.14
O43819	O43819	SCO2_HUMAN	SCO2	Protein SCO2 homolog, mitochondrial	9773.82	8690.29	11993.2	8402.72	12552.6	11202.6
O43822;O43822-2;O43822-3;O43822-4	O43822;O43822-2;O43822-3;O43822-4	CF410_HUMAN	CFAP410	Cilia- and flagella-associated protein 410	5620.2	5170.06	4575.73	5437.09	6558.96	5920.61
O43823	O43823	AKAP8_HUMAN	AKAP8	A-kinase anchor protein 8	7058.05	5041.2	4420.75	4903.38	4441.72	4818.31
O43824	O43824	GTPB6_HUMAN	GTPBP6	Putative GTP-binding protein 6	9796.08	8918.12	7708.09	8812.55	8046.49	8367.32
O43837	O43837;O43837-2	IDH3B_HUMAN	IDH3B	Isocitrate dehydrogenase [NAD] subunit beta, mitochondrial	155787	160739	158073	150673	149888	153436
O43847-2	O43847;O43847-2	NRDC_HUMAN	NRDC	Isoform 2 of Nardilysin	4253.92	5352.63	4065.87	4110.34	3416.99	2573.12
O43852-2;O43852-4	O43852;O43852-10;O43852-11;O43852-12;O43852-13;O43852-14;O43852-2;O43852-3;O43852-4;O43852-5;O43852-6;O43852-7;O43852-8;O43852-9	CALU_HUMAN	CALU	Isoform 2 of Calumenin	9286.98	9459.46	5297.28	4079.91	9503.06	7019.66
O43865	O43865	SAHH2_HUMAN	AHCYL1	S-adenosylhomocysteine hydrolase-like protein 1	112877	111701	120936	122294	131393	107285
O43896	O43896	KIF1C_HUMAN	KIF1C	Kinesin-like protein KIF1C	10643	8982.91	9786.07	9664.7	10899.5	10574
O43913	O43913;O43913-2	ORC5_HUMAN	ORC5	Origin recognition complex subunit 5	18211	20355.9	21286	18371.3	14473.8	16429.5
O43929	O43929;O43929-2;O43929-3	ORC4_HUMAN	ORC4	Origin recognition complex subunit 4	10517.2	12488.6	10699.7	9331.56	9729.03	10921.5
O43933	O43933	PEX1_HUMAN	PEX1	Peroxisomal ATPase PEX1	6966.52	5571.55	5671.11	5979.72	5733.57	8270.19
O60216	O60216	RAD21_HUMAN	RAD21	Double-strand-break repair protein rad21 homolog	19236.2	15744.4	22753	18120.6	18080	22287.5
O60229	O60229;O60229-4;O60229-5;O60229-6	KALRN_HUMAN	KALRN	Kalirin			936.135		843.135	2565.36
O60231	O60231	DHX16_HUMAN	DHX16	Pre-mRNA-splicing factor ATP-dependent RNA helicase DHX16	9055.05	10793.1	8189.41	9411.36	7848.82	8948.68
O60244	O60244	MED14_HUMAN	MED14	Mediator of RNA polymerase II transcription subunit 14	9303.93	7100.25	7512.25	6903.4	4551.76	7506.24
O60256	O60256;O60256-3	KPRB_HUMAN	PRPSAP2	Phosphoribosyl pyrophosphate synthase-associated protein 2	7912.34	8238.58	7427.45	8773.87	8176.49	5928.25
O60260;O60260-3;O60260-5;O60260-8	O60260;O60260-5;O60260-2;O60260-3;O60260-7;O60260-8	PRKN_HUMAN	PRKN	E3 ubiquitin-protein ligase parkin
O60264	O60264;P28370;P28370-2	SMCA5_HUMAN	SMARCA5	SWI/SNF-related matrix-associated actin-dependent regulator of chromatin subfamily A member 5	52424.1	51628.2	51409.5	54671.8	49274	57062.1
O60271	O60271;O60271-3;O60271-5;O60271-2;O60271-4;O60271-9	JIP4_HUMAN	SPAG9	C-Jun-amino-terminal kinase-interacting protein 4	15657	14928.6	17933.5	16168.9	16482.7	19768.6
O60282	O60282;O60282-2	KIF5C_HUMAN	KIF5C	Kinesin heavy chain isoform 5C	8538.66	9041.18	10094.8	10387	9501.55	11667.3
O60287	O60287	NPA1P_HUMAN	URB1	Nucleolar pre-ribosomal-associated protein 1	5442.62	6131.65	5423.28	5099.7	5241.31	5697.39
O60291;O60291-2;O60291-3;O60291-4	O60291;O60291-2;O60291-3;O60291-4	MGRN1_HUMAN	MGRN1	E3 ubiquitin-protein ligase MGRN1	2643.72			3775.68	2648.57	1869.82
O60293;O60293-2	O60293;O60293-2	ZC3H1_HUMAN	ZFC3H1	Zinc finger C3H1 domain-containing protein	5035.5	5334.66	6249.58	6146.27	5610.87	5473.16
O60306	O60306	AQR_HUMAN	AQR	RNA helicase aquarius	21771.1	18104	18694.2	20903.6	20729.4	21373.2
O60307	O60307	MAST3_HUMAN	MAST3	Microtubule-associated serine/threonine-protein kinase 3	2551.95	2331.93	4348.98	3633.05	2851.47	4582.14
O60308	O60308	CE104_HUMAN	CEP104	Centrosomal protein of 104 kDa		1649.32	1887.59	1962.71	1902.17	2316.44
O60313-10;O60313-2;O60313-9	O60313;O60313-10;O60313-2;O60313-9;O60313-11;O60313-13	OPA1_HUMAN	OPA1	Isoform 4 of Dynamin-like 120 kDa protein, mitochondrial	148619	137587	139188	152922	149325	142050
O60318	O60318;O60318-2	GANP_HUMAN	MCM3AP	Germinal-center associated nuclear protein	6404.21	7468.14	6140.74	6023.8	7264.53	5963.77
O60333-3	O60333-3	KIF1B_HUMAN	KIF1B	Isoform 3 of Kinesin-like protein KIF1B	18582.5	13930.1	14650.4	16349.8	14050.2	14001.8
O60333;O60333-2;O60333-4	O60333;O60333-2;O60333-4	KIF1B_HUMAN	KIF1B	Kinesin-like protein KIF1B	1225.92				1930.42	1778.42
O60341;O60341-2	O60341;O60341-2	KDM1A_HUMAN	KDM1A	Lysine-specific histone demethylase 1A	24941.5	22654.5	23013.6	23670.8	22348.5	25653
O60343;O60343-2;O60343-3	O60343;O60343-2;O60343-3;O60343-5	TBCD4_HUMAN	TBC1D4	TBC1 domain family member 4	27212	26658.9	27021.3	28843.7	30280.7	28910.1
O60346	O60346;O60346-2	PHLP1_HUMAN	PHLPP1	PH domain leucine-rich repeat-containing protein phosphatase 1	2159.53	2662.42	2944.21	2946.08	2308.92	2840.46
O60427	O60427	FADS1_HUMAN	FADS1	Acyl-CoA (8-3)-desaturase	4917.19	4931.48	5279.73	5422.5	8200.38	7017.55
O60443	O60443;O60443-3	GSDME_HUMAN	GSDME	Gasdermin-E	1987.45	2038.85	3188.14	2239.8	1300.23	2716.84
O60447;O60447-2	O60447;O60447-2	EVI5_HUMAN	EVI5	Ecotropic viral integration site 5 protein homolog	8825	6423.54	9583.85	6888.87	10777.7	9551.84
O60462;O60462-2;O60462-3;O60462-4;O60462-5;O60462-6	O60462;O60462-2;O60462-3;O60462-4;O60462-5;O60462-6	NRP2_HUMAN	NRP2	Neuropilin-2	1232.34	1542.35	1303.31	1352.83	932.907	977
O60488;O60488-2	O60488;O60488-2	ACSL4_HUMAN	ACSL4	Long-chain-fatty-acid--CoA ligase 4	74348.3	79845.1	79107.5	78868.9	72637.9	77622.6
O60493	O60493;O60493-3;O60493-4	SNX3_HUMAN	SNX3	Sorting nexin-3	11299.1	10626.6	12439.7	12433.8	13079.9	17485.1
O60502	O60502;O60502-2;O60502-3;O60502-4	OGA_HUMAN	OGA	Protein O-GlcNAcase	60670.4	67025.3	70200.9	60979.6	63106.8	66191.2
O60504;O60504-2	O60504;O60504-2	VINEX_HUMAN	SORBS3	Vinexin	19624.5	13744.4	15343.6	19154.9	20918.8	18186.7
O60506;O60506-2;O60506-3;O60506-4	O60506;O60506-4;O60506-2;O60506-3;O60506-5	HNRPQ_HUMAN	SYNCRIP	Heterogeneous nuclear ribonucleoprotein Q	24671.7	27213.7	26803.1	25959.8	23475.4	24411.9
O60508	O60508	PRP17_HUMAN	CDC40	Pre-mRNA-processing factor 17
O60518	O60518	RNBP6_HUMAN	RANBP6	Ran-binding protein 6	11983.5	15146.8	14783	14751.5	14206.4	13853.3
O60524;O60524-3;O60524-4;O60524-5	O60524;O60524-2;O60524-3;O60524-4;O60524-5	NEMF_HUMAN	NEMF	Ribosome quality control complex subunit NEMF	8334.46	7948.86	6912.2	6901.79	8043.77	8476.16
O60547	O60547;O60547-2	GMDS_HUMAN	GMDS	GDP-mannose 4,6 dehydratase	36057	39001.6	42001.2	36907.1	35774.2	38103.4
O60563	O60563	CCNT1_HUMAN	CCNT1	Cyclin-T1	4820.33	6318.46	5901.41	5540.36	3866.95	5386.22
O60566;O60566-3	O60566;O60566-2;O60566-3	BUB1B_HUMAN	BUB1B	Mitotic checkpoint serine/threonine-protein kinase BUB1 beta	22959.4	22046	22074.8	21646.2	21317.4	21739.7
O60568	O60568	PLOD3_HUMAN	PLOD3	Multifunctional procollagen lysine hydroxylase and glycosyltransferase LH3	3479.84	5578.78	6208.2	5446.28	6427.52	5174.93
O60573;O60573-2	O60573;O60573-2	IF4E2_HUMAN	EIF4E2	Eukaryotic translation initiation factor 4E type 2	14249.5	12450.1	14489	17106.9	16191.4	18564.8
O60583;O60583-2	O60583;O60583-2	CCNT2_HUMAN	CCNT2	Cyclin-T2		1085.27	187.469	634.135		517.433
O60610	O60610;O60610-2;O60610-3	DIAP1_HUMAN	DIAPH1	Protein diaphanous homolog 1	111228	107167	107147	111394	111319	109366
O60613	O60613	SEP15_HUMAN	SELENOF	Selenoprotein F	5146.98	5521	5729.61	5301.07	5094.1	4174.04
O60645	O60645	EXOC3_HUMAN	EXOC3	Exocyst complex component 3	20922.3	17758.5	17298	15831.9	18753.8	17495.7
O60658;O60658-2	O60658;O60658-2;O60658-3;O60658-4;O60658-5	PDE8A_HUMAN	PDE8A	High affinity cAMP-specific and IBMX-insensitive 3',5'-cyclic phosphodiesterase 8A	4609.45	2600.21	2514.13	3092.67	3446.66	4640.82
O60664;O60664-3;O60664-4	O60664;O60664-3;O60664-4	PLIN3_HUMAN	PLIN3	Perilipin-3	7182.37	6446.82	4439.93	5943.6	5884.51	5140.9
O60678	O60678;O60678-2	ANM3_HUMAN	PRMT3	Protein arginine N-methyltransferase 3	14515.1	14861.4	14592.1	13866.4	13240.5	11958.7
O60684	O60684	IMA7_HUMAN	KPNA6	Importin subunit alpha-7	62081.6	75009.4	74536.9	68609.1	72176.3	73666.4
O60701	O60701;O60701-2;O60701-3	UGDH_HUMAN	UGDH	UDP-glucose 6-dehydrogenase	473685	436565	476621	541847	581453	499539
O60716;O60716-10;O60716-11;O60716-13;O60716-17;O60716-18;O60716-19;O60716-2;O60716-21;O60716-3;O60716-5;O60716-9	O60716;O60716-10;O60716-11;O60716-12;O60716-13;O60716-14;O60716-15;O60716-16;O60716-17;O60716-18;O60716-19;O60716-2;O60716-20;O60716-21;O60716-22;O60716-23;O60716-24;O60716-3;O60716-4;O60716-5;O60716-6;O60716-7;O60716-8;O60716-9	CTND1_HUMAN	CTNND1	Catenin delta-1	33940.7	28837.2	32424.2	34418.5	35919.6	31309.1
O60725	O60725	ICMT_HUMAN	ICMT	Protein-S-isoprenylcysteine O-methyltransferase	7063.77	4659.54	4982.43	10969.4	2968.6	6774.08
O60749	O60749;Q13596;O60749-2;Q13596-2	SNX2_HUMAN	SNX2	Sorting nexin-2	192062	181566	197279	192706	189791	192351
O60762	O60762	DPM1_HUMAN	DPM1	Dolichol-phosphate mannosyltransferase subunit 1	4152.24	2999.2	3582.27	3391.01	3641.59	4498.39
O60763;O60763-2	O60763;O60763-2	USO1_HUMAN	USO1	General vesicular transport factor p115	151784	138247	139557	157948	157539	146633
O60783	O60783	RT14_HUMAN	MRPS14	Small ribosomal subunit protein uS14m	3377.03	3069.97	1974.29	2474.95	2455.73	3724.19
O60784;O60784-2;O60784-4	O60784;O60784-2;O60784-3;O60784-4	TOM1_HUMAN	TOM1	Target of Myb1 membrane trafficking protein	5572.14	4506.03	5818.82	6002.98	4906.12	5533.07
O60814;P57053;P58876;P62807;Q5QNW6;Q5QNW6-2;Q93079;Q99877;Q99879;Q99880	O60814;P57053;P58876;P62807;Q5QNW6;Q93079;Q99877;Q99879;Q99880;Q5QNW6-2	H2B1C_HUMAN;H2B1D_HUMAN;H2B1H_HUMAN;H2B1K_HUMAN;H2B1L_HUMAN;H2B1M_HUMAN;H2B1N_HUMAN;H2B2F_HUMAN;H2BFS_HUMAN	H2BC12;H2BC12L;H2BC13;H2BC14;H2BC15;H2BC18;H2BC4;H2BC5;H2BC9	Histone H2B type 1-K	20473.7	13344.7	16190.1	15548.9	22335	21126.5
O60826	O60826	CCD22_HUMAN	CCDC22	Coiled-coil domain-containing protein 22	19876.7	15121.4	18639.5	17745	20442.9	18801
O60832	O60832;O60832-2	DKC1_HUMAN	DKC1	H/ACA ribonucleoprotein complex subunit DKC1	52538.9	112409	51691	46488.9	57290.2	53316.2
O60841	O60841	IF2P_HUMAN	EIF5B	Eukaryotic translation initiation factor 5B	42131	66486.5	38964.3	37889.4	38998.2	38055.9
O60870;O60870-2	O60870;O60870-2	KIN17_HUMAN	KIN	DNA/RNA-binding protein KIN17	5089.29	2461.21	3930.54	3415.11	5411.38	4526.87
O60879-2	O60879;O60879-2;O60879-3	DIAP2_HUMAN	DIAPH2	Isoform 2 of Protein diaphanous homolog 2	16092.2	13538.5	14715.1	15518.3	15668	14551.5
O60884	O60884	DNJA2_HUMAN	DNAJA2	DnaJ homolog subfamily A member 2	8703.76	8278.12	8204.85	8580.35	8779.34	8677.01
O60885	O60885	BRD4_HUMAN	BRD4	Bromodomain-containing protein 4		5008.19	2563.99	4416.81	4323.76	3422.72
O60930	O60930	RNH1_HUMAN	RNASEH1	Ribonuclease H1	8994.09	7721.77	8613.31	11363.5	10555.7	9670.84
O60934	O60934	NBN_HUMAN	NBN	Nibrin	8783.44	7915.92	6568.47	9192.72	8742.98	9804.95
O60942	O60942;O60942-2;O60942-3;O60942-4	MCE1_HUMAN	RNGTT	mRNA-capping enzyme	10956.1	10022.3	10045.6	10379.6	10336.8	10686.3
O75027;O75027-2	O75027;O75027-2;O75027-3	ABCB7_HUMAN	ABCB7	Iron-sulfur clusters transporter ABCB7, mitochondrial		6504.72	7800.57		3713.11	4071.71
O75044	O75044;Q7Z6B7;Q7Z6B7-2	SRGP2_HUMAN	SRGAP2	SLIT-ROBO Rho GTPase-activating protein 2	16527.1	14569.1	14734.1	15221.2	15152.8	17058.9
O75052;O75052-3	O75052;O75052-3	CAPON_HUMAN	NOS1AP	Carboxyl-terminal PDZ ligand of neuronal nitric oxide synthase protein	4081.29	4106.68	4560.39	5260.34	4988.72	3662.01
O75061-3	O75061;O75061-2;O75061-3;O75061-4	AUXI_HUMAN	DNAJC6	Isoform 3 of Putative tyrosine-protein phosphatase auxilin	3409.29	4095.31	2373.86	5161.34	4790.15	3781.24
O75064	O75064	DEN4B_HUMAN	DENND4B	DENN domain-containing protein 4B	1644.18	2353.77	898.753	1798.65		2207.57
O75077-3	O75077;O75077-2;O75077-3	ADA23_HUMAN	ADAM23	Isoform Gamma of Disintegrin and metalloproteinase domain-containing protein 23						8735.49
O75083	O75083	WDR1_HUMAN	WDR1	WD repeat-containing protein 1	38322.2	42927.3	30779	36107.6	31688.1	29779.4
O75093;O75093-2	O75093;O75093-2	SLIT1_HUMAN	SLIT1	Slit homolog 1 protein	42386.3	36528.9	28387.4	28081.7	30640.5	21551.1
O75113	O75113	N4BP1_HUMAN	N4BP1	NEDD4-binding protein 1	20565.9	17843.8	17013.1	18053.3	21334.6	18444.9
O75116	O75116	ROCK2_HUMAN	ROCK2	Rho-associated protein kinase 2	17120.3	15218.4	16826.9	17055.5	15396.5	17084.9
O75122	O75122	CLAP2_HUMAN	CLASP2	CLIP-associating protein 2	5135.39	4523.58	6238.52	7318.96	5190.46	5468.04
O75122-3	O75122-3	CLAP2_HUMAN	CLASP2	Isoform 3 of CLIP-associating protein 2	22604.1	22702.8	23245.8	24706.3	22446.5	24778.1
O75127	O75127	PTCD1_HUMAN	PTCD1	Pentatricopeptide repeat-containing protein 1, mitochondrial	12331	14358.7	14662.8	12065.8	12613.8	10247.9
O75128;O75128-3;O75128-4;O75128-5;O75128-7	O75128;O75128-2;O75128-3;O75128-4;O75128-5;O75128-7	COBL_HUMAN	COBL	Protein cordon-bleu		2230.83	3518.81	2322.82	2971.11	3472.51
O75131	O75131	CPNE3_HUMAN	CPNE3	Copine-3	5721.58	6588.63	6616.84	7704.96	7877.74	7833.78
O75145;O75145-2	O75145;O75145-2	LIPA3_HUMAN	PPFIA3	Liprin-alpha-3	10430.7	8393.18	8614.25	10106.4	10383.8	10030
O75146	O75146;O75146-2	HIP1R_HUMAN	HIP1R	Huntingtin-interacting protein 1-related protein	22425.7	22038.8	22032.8	21890.7	20159.2	19071.7
O75147;O75147-1;O75147-4	O75147;O75147-1;O75147-2;O75147-4	OBSL1_HUMAN	OBSL1	Obscurin-like protein 1	5124.89	4820.12	5430.19	5152.16	4934.63	5175.63
O75150	O75150;O75150-3;O75150-4	BRE1B_HUMAN	RNF40	E3 ubiquitin-protein ligase BRE1B	15250.6	14061.1	16762.8	15628.6	15529	17986.8
O75152	O75152	ZC11A_HUMAN	ZC3H11A	Zinc finger CCCH domain-containing protein 11A	24224.9	20231.7	22360.8	24365.7	26743.6	27278.7
O75153	O75153	CLU_HUMAN	CLUH	Clustered mitochondria protein homolog	14649.5	14780.9	16245.1	15601	13617.4	14073.7
O75155	O75155;O75155-2	CAND2_HUMAN	CAND2	Cullin-associated NEDD8-dissociated protein 2	41344.7	43465.1	42202.9	38650	44460.7	41398.2
O75164	O75164	KDM4A_HUMAN	KDM4A	Lysine-specific demethylase 4A	6930.54	5235.92	6641.54	5642.79	6299.91	7511.71
O75165	O75165	DJC13_HUMAN	DNAJC13	DnaJ homolog subfamily C member 13	8400.4	7200.58	8031.3	7653.22	7709.97	8588.63
O75170-2;O75170-3;O75170-4;O75170-5;O75170-6	O75170;O75170-2;O75170-3;O75170-4;O75170-5;O75170-6	PP6R2_HUMAN	PPP6R2	Isoform 2 of Serine/threonine-protein phosphatase 6 regulatory subunit 2	8548.2	11205.9	9500.79	11037.5	13122.1	9446.79
O75175	O75175	CNOT3_HUMAN	CNOT3	CCR4-NOT transcription complex subunit 3	14881.1	14779.4	14028.7	14168.4	12530.1	15935.8
O75179;O75179-2;O75179-7	O75179;O75179-2;O75179-6;O75179-7	ANR17_HUMAN	ANKRD17	Ankyrin repeat domain-containing protein 17	8572.87	8242.78	10199.5	9894.54	10400.3	10446
O75182;O75182-2	O75182;O75182-2	SIN3B_HUMAN	SIN3B	Paired amphipathic helix protein Sin3b	7017.18	7358.88	7236.21	7334.8	11131.7	7165.31
O75190;O75190-3	O75190;O75190-2;O75190-3	DNJB6_HUMAN	DNAJB6	DnaJ homolog subfamily B member 6	4067.77	5474.04	4999.36	3592.31	4267.08	3486.81
O75223	O75223;O75223-3	GGCT_HUMAN	GGCT	Gamma-glutamylcyclotransferase	8746.48	9615.12	8920.85	10375.5	10488.8	7816.57
O75251-2	O75251;O75251-2	NDUS7_HUMAN	NDUFS7	Isoform 2 of NADH dehydrogenase [ubiquinone] iron-sulfur protein 7, mitochondrial	16500.6	14615.6	14347	17366.5	15145.6	14372.5
O75306;O75306-2	O75306;O75306-2	NDUS2_HUMAN	NDUFS2	NADH dehydrogenase [ubiquinone] iron-sulfur protein 2, mitochondrial	11792	13332.4	11244.5	10189.1	7649.73	10232
O75312	O75312	ZPR1_HUMAN	ZPR1	Zinc finger protein ZPR1			1676.75	1978.63	3217.44	2920.51
O75317	O75317	UBP12_HUMAN	USP12	Ubiquitin carboxyl-terminal hydrolase 12				5143.83	5272.23	3002.07
O75323	O75323	NIPS2_HUMAN	NIPSNAP2	Protein NipSnap homolog 2	33484.7	34009.2	37206.5	39899.9	48831.8	51343.9
O75330;O75330-2;O75330-3	O75330;O75330-2;O75330-3;O75330-4	HMMR_HUMAN	HMMR	Hyaluro mediated motility receptor	30683.4	25639.7	28127.9	30763.6	31928.9	31824.7
O75348	O75348	VATG1_HUMAN	ATP6V1G1	V-type proton ATPase subunit G 1	3326.56	3787.49	3182.3	2845.9	3148.92	4381.57
O75351	O75351	VPS4B_HUMAN	VPS4B	Vacuolar protein sorting-associated protein 4B	24301.8	20547.2	23101	23748.4	23129.1	27825.7
O75352;O75352-2	O75352;O75352-2	MPU1_HUMAN	MPDU1	Mannose-P-dolichol utilization defect 1 protein	1214.31	2280.39	1589.33	1207.97	1343.63	1098.25
O75354;O75354-2;O75354-3	O75354;O75354-2;O75354-3	ENTP6_HUMAN	ENTPD6	Ectonucleoside triphosphate diphosphohydrolase 6		3144.24	1667.97	1848.49	2128.94
O75356	O75356	ENTP5_HUMAN	ENTPD5	Nucleoside diphosphate phosphatase ENTPD5	4126.49	2786.59	2390.68	3321.71	4037.65	4692.39
O75362	O75362	ZN217_HUMAN	ZNF217	Zinc finger protein 217	4261.7	3904.35	4126.79	5357.15	3934.03	3790.25
O75367;O75367-1;O75367-3	O75367;O75367-1;O75367-3	H2AY_HUMAN	MACROH2A1	Core histone macro-H2A.1		2495.1	2367.8	3257.83	2664.9	2032.43
O75369;O75369-2;O75369-8;O75369-9	O75369;O75369-2;O75369-3;O75369-6;O75369-4;O75369-5;O75369-7;O75369-8;O75369-9	FLNB_HUMAN	FLNB	Filamin-B	8907.15	9008.83	9158.67	9242.4	6499.32	8286.46
O75376	O75376	NCOR1_HUMAN	NCOR1	Nuclear receptor corepressor 1	6637	5291.24	5439.81	5948.64	6007.18	6495.31
O75382;O75382-2;O75382-4	O75382;O75382-2;O75382-3;O75382-4	TRIM3_HUMAN	TRIM3	Tripartite motif-containing protein 3	4486.45	5113.07	5568.73	4892.23	3582.44	4986.7
O75385	O75385	ULK1_HUMAN	ULK1	Serine/threonine-protein kinase ULK1	1398.7	822.946	714.649	1254.94	534.224	978.497
O75386;O75386-2	O75386;O75386-2	TULP3_HUMAN	TULP3	Tubby-related protein 3	3770.69	3324.73	3040.91	4101.51	3281.72	4104.84
O75390	O75390	CISY_HUMAN	CS	Citrate synthase, mitochondrial	491135	462402	427031	444124	499864	435785
O75394	O75394	RM33_HUMAN	MRPL33	Large ribosomal subunit protein bL33m		1343.78	2152.43	1325.44	2404.03	488.311
O75396	O75396	SC22B_HUMAN	SEC22B	Vesicle-trafficking protein SEC22b	12418.7	12668.2	13394.1	13494.5	14896.4	14842.7
O75400-3	O75400;O75400-2;O75400-3	PR40A_HUMAN	PRPF40A	Isoform 3 of Pre-mRNA-processing factor 40 homolog A	41785	34723.6	32382.1	35783.2	39398.7	35191.4
O75417;O75417-2	O75417;O75417-2	DPOLQ_HUMAN	POLQ	DNA polymerase theta	3209.48	4291.73	3396.89	4427.45	5003.46	3433.66
O75419;O75419-2;O75419-3	O75419;O75419-2;O75419-3	CDC45_HUMAN	CDC45	Cell division control protein 45 homolog	24736.9	25627.6	25253.6	24258.4	22711.4	21645.3
O75427	O75427	LRCH4_HUMAN	LRCH4	Leucine-rich repeat and calponin homology domain-containing protein 4	8019.55	8003.32	7444.54	5631.89	5468.4	6109.97
O75436	O75436	VP26A_HUMAN	VPS26A	Vacuolar protein sorting-associated protein 26A	40547.2	43803.4	38722.2	44196.2	45217.6	39412.7
O75439	O75439	MPPB_HUMAN	PMPCB	Mitochondrial-processing peptidase subunit beta	23886.5	23740.2	26104.7	27276.8	28661.5	27018.2
O75446	O75446	SAP30_HUMAN	SAP30	Histone deacetylase complex subunit SAP30	2600.39	3480.39	3099.6	3733.48	5155.6	4826.37
O75448	O75448;O75448-2	MED24_HUMAN	MED24	Mediator of RNA polymerase II transcription subunit 24	5440.5	4590.27	4595.1	5015.18	4448.48	4971.62
O75449	O75449	KTNA1_HUMAN	KATNA1	Katanin p60 ATPase-containing subunit A1	30431.3	26510.3	27218.3	25916.9	26083.3	24010.9
O75461;O75461-2;O75461-3	O75461;O75461-2;O75461-3	E2F6_HUMAN	E2F6	Transcription factor E2F6	1524.03		2353.74	2556.51	1079.67	2557.92
O75462	O75462	CRLF1_HUMAN	CRLF1	Cytokine receptor-like factor 1	15115.1	12436.1	10265.6	13929.9	16967.6	14962.2
O75475	O75475	PSIP1_HUMAN	PSIP1	PC4 and SFRS1-interacting protein	1228.29	1913.12	2368.36	1720.53	1287.63	2084.25
O75477	O75477	ERLN1_HUMAN	ERLIN1	Erlin-1	14259.7	10760	11355.7	10545.8	9163.5	7339.92
O75486;O75486-4	O75486;O75486-4	SUPT3_HUMAN	SUPT3H	Transcription initiation protein SPT3 homolog		765.046	557.759	258.891
O75487	O75487;O75487-2	GPC4_HUMAN	GPC4	Glypican-4	23561.7	21226	25754.8	22477	23196.9	20083.3
O75489	O75489	NDUS3_HUMAN	NDUFS3	NADH dehydrogenase [ubiquinone] iron-sulfur protein 3, mitochondrial	11905.8	11769.7	12283.7	9905.36	8311.67	11868.8
O75494;O75494-2;O75494-3;O75494-4;O75494-5;O75494-6	O75494;O75494-2;O75494-3;O75494-4;O75494-5;O75494-6	SRS10_HUMAN	SRSF10	Serine/arginine-rich splicing factor 10	14598.6	12734.5	8833.38	10408.3	11551.5	9353.64
O75521;O75521-2	O75521;O75521-2	ECI2_HUMAN	ECI2	Enoyl-CoA delta isomerase 2	29018.6	24668.7	26675	28285.3	31911.7	31965.5
O75530;O75530-2;O75530-3	O75530;O75530-2;O75530-3	EED_HUMAN	EED	Polycomb protein EED	2017.88	2719.93	1447.06	2318.85	2280.82	2004.86
O75531	O75531	BAF_HUMAN	BANF1	Barrier-to-autointegration factor	5842.13	10377.3	9043.16	6167.88	9068.34	6710.37
O75533	O75533	SF3B1_HUMAN	SF3B1	Splicing factor 3B subunit 1	119564	116310	113431	126796	116939	133862
O75534;O75534-2;O75534-3;O75534-4	O75534;O75534-2;O75534-3;O75534-4	CSDE1_HUMAN	CSDE1	Cold shock domain-containing protein E1	23073.9	21817.3	22840.4	23047.1	23995.8	25120.4
O75569	O75569;O75569-2;O75569-3	PRKRA_HUMAN	PRKRA	Interferon-inducible double-stranded RNA-dependent protein kinase activator A	8488.63	7582.37	7111.93	7338.46	9510.75	8770.59
O75570	O75570;O75570-2	RF1M_HUMAN	MTRF1	Peptide chain release factor 1, mitochondrial	6257.94				9823.22
O75582	O75582;O75582-2	KS6A5_HUMAN	RPS6KA5	Ribosomal protein S6 kinase alpha-5	2904.58	2342.96	2443.71	2403.95	3050.17	3102.29
O75586	O75586;O75586-3	MED6_HUMAN	MED6	Mediator of RNA polymerase II transcription subunit 6	1404.4	2076.79	2379.03	1737.36	1654.21	1459.52
O75592;O75592-2	O75592;O75592-2	MYCB2_HUMAN	MYCBP2	E3 ubiquitin-protein ligase MYCBP2	5588.18	4884.3	3335.47	3177.44	6165.6	4726.15
O75600;O75600-2	O75600;O75600-2	KBL_HUMAN	GCAT	2-amino-3-ketobutyrate coenzyme A ligase, mitochondrial	4270.72	2922.8	3235.56	3561.99	4033.89	4197.23
O75607	O75607	NPM3_HUMAN	NPM3	Nucleoplasmin-3	2676.76	2704.12	2470.06	3157.53	2126.84	2288.47
O75608;O75608-2	O75608;O75608-2	LYPA1_HUMAN	LYPLA1	Acyl-protein thioesterase 1	16132.5	19748.3	24365.1	18634	14613.1	17862.8
O75616	O75616;O75616-2	ERAL1_HUMAN	ERAL1	GTPase Era, mitochondrial	16509.9	17894.9	17026.1	16129.4	15915.7	14997.4
O75643	O75643;O75643-2	U520_HUMAN	SNRNP200	U5 small nuclear ribonucleoprotein 200 kDa helicase	24568.1	25862.7	24849.7	25606.4	22258.6	24310.5
O75663	O75663;O75663-2	TIPRL_HUMAN	TIPRL	TIP41-like protein	14962.9	14216.9	14755.8	14422	14069.5	14824.1
O75665;O75665-3	O75665;O75665-3	OFD1_HUMAN	OFD1	Centriole and centriolar satellite protein OFD1	2164.56	1135.88			1761.32	2104.7
O75676;O75676-2	O75676;O75676-2	KS6A4_HUMAN	RPS6KA4	Ribosomal protein S6 kinase alpha-4	7047.94	7952.5	7437.33	6791.1	5587.75	7809.05
O75691	O75691	UTP20_HUMAN	UTP20	Small subunit processome component 20 homolog	1135.3	834.679	1571.09	1499.01	1642.2	1899.53
O75694	O75694;O75694-2	NU155_HUMAN	NUP155	Nuclear pore complex protein Nup155	73841.8	79124.8	78132.6	79424.1	78682.6	70784
O75715	O75715	GPX5_HUMAN	GPX5	Epididymal secretory glutathione peroxidase	8187.72	10468.6	5369.35	7492.07	10759.6	5460.33
O75717	O75717;O75717-2	WDHD1_HUMAN	WDHD1	WD repeat and HMG-box DNA-binding protein 1	31865	28536.5	30275.6	34361	31404.8	32916.8
O75771;O75771-5;O75771-8	O75771;O75771-3;O75771-4;O75771-5;O75771-8	RA51D_HUMAN	RAD51D	DNA repair protein RAD51 homolog 4	2322.95		3090.91	2467.14	5019.99
O75787;O75787-2	O75787;O75787-2	RENR_HUMAN	ATP6AP2	Renin receptor	4962.97	4384.56	4786.95	5122.3	8149.96	5793.82
O75792	O75792	RNH2A_HUMAN	RNASEH2A	Ribonuclease H2 subunit A	5420.77	5116.03	6207.46	5439.19	4914.17	7294.22
O75794	O75794	CD123_HUMAN	CDC123	Cell division cycle protein 123 homolog	63771.2	65202.7	67783.7	66832.7	70272.2	58704.8
O75808	O75808	CAN15_HUMAN	CAPN15	Calpain-15	646.913
O75817	O75817	POP7_HUMAN	POP7	Ribonuclease P protein subunit p20	8464.8	11893.7	10123.3	9890.32	8481.38	11726.5
O75821	O75821	EIF3G_HUMAN	EIF3G	Eukaryotic translation initiation factor 3 subunit G	30051.8	31791.3	28536.5	28882.1	25585.1	26414.8
O75822;O75822-2	O75822;O75822-2;O75822-3	EIF3J_HUMAN	EIF3J	Eukaryotic translation initiation factor 3 subunit J	11557	14871.1	15442.5	16072.8	14211.2	18173
O75832	O75832	PSD10_HUMAN	PSMD10	26S proteasome non-ATPase regulatory subunit 10	2945.89		1612.58	1703.35	2555.36	1868
O75843	O75843	AP1G2_HUMAN	AP1G2	AP-1 complex subunit gamma-like 2	13842	15469	17995.2	14768.2	14847.4	15631.6
O75844	O75844	FACE1_HUMAN	ZMPSTE24	CAAX prenyl protease 1 homolog	2318.08	2683.4	2371.8	2974.44	1084.9	1975.65
O75864	O75864	PPR37_HUMAN	PPP1R37	Protein phosphatase 1 regulatory subunit 37	3527.34	3504.72	4389.33	3934.74	3471.68	2935.56
O75865;O75865-2	O75865;O75865-2	TPC6A_HUMAN	TRAPPC6A	Trafficking protein particle complex subunit 6A	1093.71				1260.12	1419.46
O75874	O75874	IDHC_HUMAN	IDH1	Isocitrate dehydrogenase [NADP] cytoplasmic	13170	15670.1	11796.1	11460.6	10068.8	10394.2
O75879	O75879	GATB_HUMAN	GATB	Glutamyl-tRNA(Gln) amidotransferase subunit B, mitochondrial	14702.4	19756	19888.4	21039.6	20736.3	25084.6
O75880	O75880	SCO1_HUMAN	SCO1	Protein SCO1 homolog, mitochondrial	5369.95		3762.26	4593.06	5430.46	8235.1
O75886	O75886;O75886-2	STAM2_HUMAN	STAM2	Signal transducing adapter molecule 2	5731.21	5064.49	5635	4171.62	3752.01	4477
O75909;O75909-4	O75909;O75909-2;O75909-1;O75909-4	CCNK_HUMAN	CCNK	Cyclin-K	21799.1	22958.3	19884.6	20993	14859.4	20099.5
O75915	O75915	PRAF3_HUMAN	ARL6IP5	PRA1 family protein 3	2599.62	2235.43	2136.92	3681.07	2678.39	2763.18
O75925;O75925-2	O75925;O75925-2	PIAS1_HUMAN	PIAS1	E3 SUMO-protein ligase PIAS1	28277.4	32214.7	34884.8	28066.7	28981.3	37737.4
O75928;O75928-2;O75928-3	O75928;O75928-2;Q9Y6X2;O75928-3	PIAS2_HUMAN	PIAS2	E3 SUMO-protein ligase PIAS2	7384.27	7732.83	7439.09	7332.89	5789.72	9779.97
O75934	O75934	SPF27_HUMAN	BCAS2	Pre-mRNA-splicing factor SPF27	2507.83	4256.11	4483.87	4561.42	6621.33	4002.59
O75935;O75935-3	O75935;O75935-2;O75935-3	DCTN3_HUMAN	DCTN3	Dynactin subunit 3	17216	20410.3	21626.4	18538.6	19750.5	16633.7
O75943;O75943-2;O75943-3;O75943-4	O75943;O75943-2;O75943-3;O75943-4	RAD17_HUMAN	RAD17	Cell cycle checkpoint protein RAD17	1914.25	1118.89	1104.5	1477.37	2925.32	3021.11
O75947;O75947-2	O75947;O75947-2	ATP5H_HUMAN	ATP5PD	ATP synthase subunit d, mitochondrial		2362.4		1484.35		2400.63
O75955	O75955;O75955-2	FLOT1_HUMAN	FLOT1	Flotillin-1	7602.31	9125.18	8195.55	8469.9	6221.82	7328.83
O75962;O75962-2	O75962;O75962-2;O75962-4;O75962-5	TRIO_HUMAN	TRIO	Triple functional domain protein	12244.2	15683.4	12425.4	11885.5	14809.9	11756.8
O75964	O75964	ATP5L_HUMAN	ATP5MG	ATP synthase subunit g, mitochondrial	19976.7	24745.6	25092.9	24166.8	18586.6	22304.5
O75970;O75970-2;O75970-3;O75970-5	O75970;O75970-2;O75970-3;O75970-5	MPDZ_HUMAN	MPDZ	Multiple PDZ domain protein	14290.9	11970	13573.1	14608.5	14673.4	14487.6
O75976	O75976	CBPD_HUMAN	CPD	Carboxypeptidase D	17444.1	15269.4	16297.1	15564.9	13015.3	21316.8
O76003	O76003	GLRX3_HUMAN	GLRX3	Glutaredoxin-3	19959.9	20380.3	19962	20299.7	15300.8	16317.6
O76009	O76009	KT33A_HUMAN	KRT33A	Keratin, type I cuticular Ha3-I				12459.5
O76011	O76011	KRT34_HUMAN	KRT34	Keratin, type I cuticular Ha4
O76013	O76013	KRT36_HUMAN	KRT36	Keratin, type I cuticular Ha6
O76021	O76021	RL1D1_HUMAN	RSL1D1	Ribosomal L1 domain-containing protein 1	17738.3	14347.9	14186.3	13364	18794.7	17912.3
O76024	O76024	WFS1_HUMAN	WFS1	Wolframin	535.919	418.797	172.617	364.118	192.2	397.378
O76031	O76031	CLPX_HUMAN	CLPX	ATP-dependent Clp protease ATP-binding subunit clpX-like, mitochondrial	109039	102235	109363	100665	99676.4	99613.3
O76064	O76064;O76064-3	RNF8_HUMAN	RNF8	E3 ubiquitin-protein ligase RNF8	3241.34	2766.74	3706.21	4167.77	3380.6	3092.05
O76071	O76071	CIAO1_HUMAN	CIAO1	Probable cytosolic iron-sulfur protein assembly protein CIAO1	10732.7	12506.3	8514.68	7957.46	8128.53	8081.21
O76094	O76094;O76094-2	SRP72_HUMAN	SRP72	Signal recognition particle subunit SRP72	89951.5	82656.3	88885.4	91040.2	98522.6	93878.5
O94761	O94761	RECQ4_HUMAN	RECQL4	ATP-dependent DNA helicase Q4	5223.96	3834.54	5503.81	4856.75	6246.59	5831.44
O94763;O94763-2;O94763-3	O94763;O94763-2;O94763-3;O94763-4	RMP_HUMAN	URI1	Unconventional prefoldin RPB5 interactor 1	4480.01	2484.96	2723.55	2800.08	3664.63	4267.78
O94766;O94766-2	O94766;O94766-2	B3GA3_HUMAN	B3GAT3	Galactosylgalactosylxylosylprotein 3-beta-glucuronosyltransferase 3	9696.47	10102.1	11093.7	11573.5	13911.4	11865.3
O94768	O94768	ST17B_HUMAN	STK17B	Serine/threonine-protein kinase 17B	1984.6	2450.94	2197.3	1961.05	2484.32	1459.43
O94776	O94776	MTA2_HUMAN	MTA2	Metastasis-associated protein MTA2	293875	273815	283298	295259	308719	303666
O94782	O94782	UBP1_HUMAN	USP1	Ubiquitin carboxyl-terminal hydrolase 1	16154.6	15199.1	14072.3	21848.7	20794.3	20573.8
O94788;O94788-2	O94788;O94788-2;O94788-3;O94788-4	AL1A2_HUMAN	ALDH1A2	Retinal dehydrogenase 2	11570.3	13702.2	11903.4	12898.8	12932.1	14110.3
O94804	O94804	STK10_HUMAN	STK10	Serine/threonine-protein kinase 10	7159.21	6250.76	7575.55	8185.28	6691.42	4932.46
O94806	O94806	KPCD3_HUMAN	PRKD3	Serine/threonine-protein kinase D3	7097.55	7873.98	8085.62	7679.05	7410.03	8946.99
O94808	O94808	GFPT2_HUMAN	GFPT2	Glutamine--fructose-6-phosphate aminotransferase [isomerizing] 2	33713	31507.5	34873.1	33244.5	31177.7	33547.3
O94813	O94813;O94813-2;O94813-3	SLIT2_HUMAN	SLIT2	Slit homolog 2 protein	14494.6	17963.1	15832.4	20249.8	20138.9	21127.1
O94822;O94822-3	O94822;O94822-3	LTN1_HUMAN	LTN1	E3 ubiquitin-protein ligase listerin	22675.2	23339.6	23313.1	23716.3	20668.3	24124.8
O94826	O94826	TOM70_HUMAN	TOMM70	Mitochondrial import receptor subunit TOM70	3217.57	2709.4	2433.01	4205.3	3590.88	3243.14
O94829	O94829	IPO13_HUMAN	IPO13	Importin-13	3781.25	4564.67	4189.17	3588.26	3015.31	3896.37
O94830	O94830	DDHD2_HUMAN	DDHD2	Phospholipase DDHD2	3046.09	2953.82	3281.03	2679.96	2801.69	3176.9
O94832	B0I1T2;O94832;B0I1T2-2;B0I1T2-3;B0I1T2-4	MYO1D_HUMAN	MYO1D	Unconventional myosin-Id	8493.48	10050.7	10017.2	8782.02	6135.46	8346.3
O94842;O94842-2;O94842-3	O94842;O94842-2;O94842-3	TOX4_HUMAN	TOX4	TOX high mobility group box family member 4	7679.61	9753.32	7449.52	7630.83	6533.89	7915.19
O94855;O94855-2	O94855;O94855-2	SC24D_HUMAN	SEC24D	Protein transport protein Sec24D	15119.2	17558	17560.2	14217.7	16770.7	15131
O94864;O94864-2	O94864;O94864-2	ST65G_HUMAN	SUPT7L	STAGA complex 65 subunit gamma	2455.74	2373.8	1737.63	2173.62	1769.69	2229.27
O94868;O94868-2;O94868-3	O94868;O94868-3;O94868-2	FCSD2_HUMAN	FCHSD2	F-BAR and double SH3 domains protein 2	6002.17	5782.6	3810.61	5760.46	7258.96	7123.98
O94874	O94874;O94874-2;O94874-3	UFL1_HUMAN	UFL1	E3 UFM1-protein ligase 1	19854.6	19918.4	19215.7	18523.6	16602.6	19807.8
O94880;O94880-1;O94880-2	O94880;O94880-1;O94880-2	PHF14_HUMAN	PHF14	PHD finger protein 14	1004.91		923.819	1596.3	780.415	1616.62
O94885	O94885	SASH1_HUMAN	SASH1	SAM and SH3 domain-containing protein 1	3276.15	2163.49	3214.86	3440.42	3835.49	4023.54
O94887	O94887;O94887-2;O94887-3	FARP2_HUMAN	FARP2	FERM, ARHGEF and pleckstrin domain-containing protein 2	23531.8	26849.3	20542.4	30087.7	24094.5	26913.1
O94888	O94888	UBXN7_HUMAN	UBXN7	UBX domain-containing protein 7	9179.82	10258.5	11392.8	9250.63	11241	10563.3
O94889;O94889-2	O94889;O94889-2	KLH18_HUMAN	KLHL18	Kelch-like protein 18	5320.22	4715.94	5418.84	5941.19	4929.92	4777.88
O94903	O94903	PLPHP_HUMAN	PLPBP	Pyridoxal phosphate homeostasis protein	22100.7	15930.4	16874.2	14998.2	20092.3	21218
O94905	O94905	ERLN2_HUMAN	ERLIN2	Erlin-2	15015.3	16111.6	16185.5	16815.2	13527.1	14494.3
O94906	O94906;O94906-2	PRP6_HUMAN	PRPF6	Pre-mRNA-processing factor 6	27539.4	26385.1	27214.7	26197.6	27814.2	28988.5
O94913	O94913	PCF11_HUMAN	PCF11	Pre-mRNA cleavage complex 2 protein Pcf11	4432.74	2836.55	2457.28	2596.29	2279.65	2864.27
O94915	O94915	FRYL_HUMAN	FRYL	Protein furry homolog-like	15804	13369.4	15400.3	14937.7	15390.1	16976.6
O94925	O94925	GLSK_HUMAN	GLS	Glutaminase kidney isoform, mitochondrial	2392.28	3386.77	2501.45	4288.01	3825.55	2003
O94925-3	O94925;O94925-3	GLSK_HUMAN	GLS	Isoform 3 of Glutaminase kidney isoform, mitochondrial	121781	103046	112721	122549	122593	137410
O94927	O94927	HAUS5_HUMAN	HAUS5	HAUS augmin-like complex subunit 5	19902.8	19930.1	21107.6	20669.6	20695.7	18263
O94941;O94941-2	O94941;O94941-2	RNF37_HUMAN	UBOX5	RING finger protein 37	9805.03	10423.2	14188	11630.1	11794.4	12958.9
O94952;O94952-1	O94952;O94952-1	FBX21_HUMAN	FBXO21	F-box only protein 21	6119.78	4734.36	5608.64	4920.84	5577.39	6253.67
O94953	O94953	KDM4B_HUMAN	KDM4B	Lysine-specific demethylase 4B	10054.5	9299.53	8125.57	9151.02	8826.32	8880.44
O94964-2	O94964;O94964-4;O94964-2	SOGA1_HUMAN	SOGA1	Isoform 2 of Protein SOGA1	9138.87	8864.82	8510.07	10309.8	9629.84	10153.4
O94966-5	O94966;O94966-2;O94966-3;O94966-4;O94966-5;O94966-6;O94966-7	UBP19_HUMAN	USP19	Isoform 5 of Ubiquitin carboxyl-terminal hydrolase 19	26926.6	27976.7	32292.8	202800	227296	178298
O94967;O94967-2;O94967-3;O94967-4	O94967;O94967-2;O94967-3;O94967-4	WDR47_HUMAN	WDR47	WD repeat-containing protein 47	5504.5	5376.19	4711.82	5757.62	5357.31	4982.68
O94972;O94972-2;O94972-3	O94972;O94972-2;O94972-3	TRI37_HUMAN	TRIM37	E3 ubiquitin-protein ligase TRIM37	2444.02	1166.8	2446.6	2288.63	1434.47	2419.32
O94973	O94973	AP2A2_HUMAN	AP2A2	AP-2 complex subunit alpha-2	36605.3	52899	55792	29681.7	49020.5	47006.3
O94973-2	O94973;O94973-2	AP2A2_HUMAN	AP2A2	Isoform 2 of AP-2 complex subunit alpha-2	64040.6	66379	65705.3	67608.5	73009.4	68033
O94979	O94979;O94979-10;O94979-2;O94979-3;O94979-4;O94979-5;O94979-6;O94979-7;O94979-8;O94979-9	SC31A_HUMAN	SEC31A	Protein transport protein Sec31A	125001	123489	132305	114405	117365	137646
O94985;O94985-2	O94985;O94985-2	CSTN1_HUMAN	CLSTN1	Calsyntenin-1	7623.93	5580.39	6228.02	4605.53	4775.89	5044.09
O94986;O94986-1;O94986-2;O94986-3	O94986;O94986-1;O94986-2;O94986-3	CE152_HUMAN	CEP152	Centrosomal protein of 152 kDa
O95059	O95059	RPP14_HUMAN	RPP14	Ribonuclease P protein subunit p14	1514.68	1981.93	1781.53	1713.94	2128.7	1697.03
O95067	O95067	CCNB2_HUMAN	CCNB2	G2/mitotic-specific cyclin-B2	12045.4	14519.4	12263.8	15155.1	13998.3	11760.7
O95071;O95071-2	O95071;O95071-2	UBR5_HUMAN	UBR5	E3 ubiquitin-protein ligase UBR5	20250.7	18537.9	19728.5	21790.4	20863	21551.6
O95081	O95081;O95081-2	AGFG2_HUMAN	AGFG2	Arf-GAP domain and FG repeat-containing protein 2	4428.05	3963.78	2917.36	5145.91	4436.55	7777.88
O95140	O95140	MFN2_HUMAN	MFN2	Mitofusin-2	4696.09	5350.27	3832.57	3472.02	6494.02	4041.87
O95149	O95149	SPN1_HUMAN	SNUPN	Snurportin-1	20442.7	15596.4	18427.6	18816.8	15490.8	21065.1
O95155;O95155-2;O95155-4	O95155;O95155-2;O95155-3;O95155-4	UBE4B_HUMAN	UBE4B	Ubiquitin conjugation factor E4 B	41717.1	37678.6	41762.2	38508.6	35844.4	39912.8
O95163	O95163	ELP1_HUMAN	ELP1	Elongator complex protein 1	22810.1	25166.9	24299.8	26403.7	24628.2	23223.4
O95197-3	O95197;O95197-3;O95197-2;O95197-4;O95197-7	RTN3_HUMAN	RTN3	Isoform 3 of Reticulon-3	6495.67	4839.72	7083.98	6007.93	4927.54	4171.13
O95202	O95202	LETM1_HUMAN	LETM1	Mitochondrial proton/calcium exchanger protein	8090.6	8134.31	8721.4	7745.76	8968.65	8735.8
O95208;O95208-2;O95208-3	O95208;O95208-2;O95208-3	EPN2_HUMAN	EPN2	Epsin-2						628.202
O95218;O95218-2	O95218;O95218-2	ZRAB2_HUMAN	ZRANB2	Zinc finger Ran-binding domain-containing protein 2	8275.92	9701.86	7562.23	9851.86	9627.92	8666.23
O95219	O95219;O95219-2	SNX4_HUMAN	SNX4	Sorting nexin-4	18211.2	14923.4	14344.3	16399.8	17220.7	17060
O95229	O95229	ZWINT_HUMAN	ZWINT	ZW10 interactor	4525.4	4642.85	4758.19	2909.26	6373.94	4065.28
O95232	O95232	LC7L3_HUMAN	LUC7L3	Luc7-like protein 3	2488.85	2495.42	2156.4	1988.3	1738.46	2171.6
O95235;O95235-2	O95235;O95235-2	KI20A_HUMAN	KIF20A	Kinesin-like protein KIF20A	14163.7	14027.3	14386.7	15702.3	15106.4	13889.5
O95239	O95239;Q2VIQ3;O95239-2	KIF4A_HUMAN	KIF4A	Chromosome-associated kinesin KIF4A	44562	44335.7	43327.9	47393.8	45725.6	47337.9
O95248;O95248-4;O95248-5	O95248;O95248-4;O95248-5	MTMR5_HUMAN	SBF1	Myotubularin-related protein 5	14749.1	14096	14719.9	14934.9	16238.2	14637.7
O95251;O95251-2;O95251-4	O95251;O95251-2;O95251-3;O95251-4;O95251-5	KAT7_HUMAN	KAT7	Histone acetyltransferase KAT7	694.245		867.841	1079.1		827.646
O95273;O95273-2	O95273;O95273-2	CCDB1_HUMAN	CCNDBP1	Cyclin-D1-binding protein 1	6943	6399.31	6123.5	7824.09	7333.3	6979.55
O95299	O95299	NDUAA_HUMAN	NDUFA10	NADH dehydrogenase [ubiquinone] 1 alpha subcomplex subunit 10, mitochondrial	16938.4	14765.3	13771.3	12749.2	15772.6	12613.5
O95302;O95302-3	O95302;O95302-2;O95302-3;Q75LS8	FKBP9_HUMAN	FKBP9	Peptidyl-prolyl cis-trans isomerase FKBP9	12178	8508.19	9222.69	8445.04	8383.08	6075.94
O95319;O95319-2;O95319-3;O95319-4;O95319-5	O95319;O95319-2;O95319-3;O95319-4;O95319-5	CELF2_HUMAN	CELF2	CUGBP Elav-like family member 2	9281.69	5406.87	7508.96	6925.32	9796.21	8642.08
O95336	O95336	6PGL_HUMAN	PGLS	6-phosphogluconolactonase	13592.9	15347.1	16961.6	12547.5	13623	14031.5
O95340;O95340-2	O95340;O95340-2	PAPS2_HUMAN	PAPSS2	Bifunctional 3'-phosphoadenosine 5'-phosphosulfate synthase 2	27604.1	23480.2	26068	27370.7	25391.1	28723.5
O95347	O95347;O95347-2	SMC2_HUMAN	SMC2	Structural maintece of chromosomes protein 2	156297	147595	152050	163201	154800	160577
O95352	O95352;O95352-2;O95352-3	ATG7_HUMAN	ATG7	Ubiquitin-like modifier-activating enzyme ATG7	4689.83	5277.27	5109.17	4182.36	4428.38	4072.12
O95363	O95363	SYFM_HUMAN	FARS2	Phenylalanine--tRNA ligase, mitochondrial	5303.07	6192.06	4774.33	5599.75	4166.47	5930.49
O95372	O95372	LYPA2_HUMAN	LYPLA2	Acyl-protein thioesterase 2	8501.87	7916.06	11604.8	6225.16	8899.62	8357.29
O95373	O95373	IPO7_HUMAN	IPO7	Importin-7	77317.6	83887.5	87729.2	81812.3	67592.8	77248.9
O95376	O95376	ARI2_HUMAN	ARIH2	E3 ubiquitin-protein ligase ARIH2	7298.9	6158.24	6144.02	5447.22	5929.96	5173.28
O95382;O95382-3	O95382;O95382-3	M3K6_HUMAN	MAP3K6	Mitogen-activated protein kinase kinase kinase 6	9606.96	8876.68	9926.52	9455.32	9750.85	10504.9
O95394;O95394-3;O95394-4	O95394;O95394-3;O95394-4	AGM1_HUMAN	PGM3	Phosphoacetylglucosamine mutase	4679.33	6309.31	4087.89	4423.8	3467.91
O95396	O95396	MOCS3_HUMAN	MOCS3	Adenylyltransferase and sulfurtransferase MOCS3	20619.3	20546.4	21736.9	23315.8	24307.8	19743.5
O95397	Q96JA3;O95397;Q96JA3-2;Q96JA3-3	PKHA9_HUMAN	PLEKHA8P1	Putative protein PLEKHA9	2162.07	3186.72	3208.39	2332.92		2919.54
O95405	O95405;O95405-2;O95405-3	ZFYV9_HUMAN	ZFYVE9	Zinc finger FYVE domain-containing protein 9		5591.69	5192.8	3230.34	5640.37	4623.98
O95416	O95416	SOX14_HUMAN	SOX14	Transcription factor SOX-14		2975.54	3036	2595.55	2421.07
O95433	O95433;O95433-2	AHSA1_HUMAN	AHSA1	Activator of 90 kDa heat shock protein ATPase homolog 1	347415	339774	336131	341751	308761	328303
O95453;O95453-2	O95453;O95453-2;O95453-3;O95453-4	PARN_HUMAN	PARN	Poly(A)-specific ribonuclease PARN	13616.6	10067.6	10976	10839.6	10260	14179.2
O95456;O95456-2	O95456;O95456-2	PSMG1_HUMAN	PSMG1	Proteasome assembly chaperone 1	75070.6	92379.9	83583.4	77003.6	78399.7	80753.4
O95470	O95470	SGPL1_HUMAN	SGPL1	Sphingosine-1-phosphate lyase 1	9601.92	7056.02	5365.23	6465.8	7439.27	8463.24
O95486	O95486	SC24A_HUMAN	SEC24A	Protein transport protein Sec24A	56441.3	59555.8	62627.9	56029.6	52690.4	69059.3
O95487;O95487-2;O95487-3	O95487;O95487-2;O95487-3	SC24B_HUMAN	SEC24B	Protein transport protein Sec24B	19023.2	18978.1	21929.7	16977.6	17876.4	21990.2
O95544;O95544-2	O95544;O95544-2;O95544-3	NADK_HUMAN	NADK	NAD kinase	10229.4	10415.8	8562.78	9752.99	9258.09	9359.19
O95551;O95551-2	O95551;O95551-2;O95551-3	TYDP2_HUMAN	TDP2	Tyrosyl-DNA phosphodiesterase 2		3197.08	1871.74	1508.23	485.244	1767.31
O95563	O95563	MPC2_HUMAN	MPC2	Mitochondrial pyruvate carrier 2	2357.87	1202.5	649.889	1116.5		1199.9
O95568	O95568	MET18_HUMAN	METTL18	Histidine protein methyltransferase 1 homolog	7780.21	7562.57	5332.46	8104.18	9776.26	7102.27
O95573	O95573	ACSL3_HUMAN	ACSL3	Fatty acid CoA ligase Acsl3	23021.4	25401.4	23472.2	22172.1	21904	21670.1
O95602	O95602	RPA1_HUMAN	POLR1A	DNA-directed RNA polymerase I subunit RPA1	18199	18560.9	18845.2	17882.8	20133.7	20960.4
O95613;O95613-2	O95613;O95613-2	PCNT_HUMAN	PCNT	Pericentrin	6008.71	4972.83	5613.47	6239.7	5536.56	6553.13
O95619	O95619	YETS4_HUMAN	YEATS4	YEATS domain-containing protein 4	46263.7	42555.9	40639.3	48007	47931.4	37664.2
O95625	O95625	ZBT11_HUMAN	ZBTB11	Zinc finger and BTB domain-containing protein 11	4112.32	3596.23	3993.64	3703.84	4430.46	3291.52
O95628;O95628-10;O95628-2;O95628-3;O95628-4;O95628-5;O95628-6;O95628-7;O95628-8;O95628-9	O95628;O95628-10;O95628-2;O95628-3;O95628-4;O95628-5;O95628-6;O95628-7;O95628-8;O95628-9	CNOT4_HUMAN	CNOT4	CCR4-NOT transcription complex subunit 4	2115.01	1952.2	2505.59	1998.46	1570.35	1360.16
O95630;O95630-2	O95630;O95630-2	STABP_HUMAN	STAMBP	STAM-binding protein		750.764	4387.75	1907.07	2522.46	2917.4
O95644-17	O95644;O95644-10;O95644-11;O95644-17;O95644-2;O95644-3;O95644-4;O95644-5;O95644-6;O95644-8	NFAC1_HUMAN	NFATC1	Isoform 10 of Nuclear factor of activated T-cells, cytoplasmic 1	4158.68	3529.83	2796.44	1247.75		3922.47
O95671	O95671;O95671-2;O95671-3	ASML_HUMAN	ASMTL	Probable bifunctional dTTP/UTP pyrophosphatase/methyltransferase protein	2964.8	4105.46	2740.46	2541.49	2577.83	3867.64
O95677;O95677-2;O95677-4;O95677-5	O95677;O95677-2;O95677-4;O95677-5	EYA4_HUMAN	EYA4	Eyes absent homolog 4		808.38	1600.36
O95684	O95684	CEP43_HUMAN	CEP43	Centrosomal protein 43	3512.25	3623.46	3329.48	3146.97	4185.26	3476.47
O95685	O95685	PPR3D_HUMAN	PPP1R3D	Protein phosphatase 1 regulatory subunit 3D	6263.51	6647.65	7684.13	8757.01	8512.2	9345.93
O95707	O95707	RPP29_HUMAN	POP4	Ribonuclease P protein subunit p29	1065.02	1137.84	1002.97	265.559	884.533	490.678
O95714	O95714;Q9BVR0	HERC2_HUMAN	HERC2	E3 ubiquitin-protein ligase HERC2	6372.95	6371.88	5803.68	8562.51	8683.73	8351.88
O95747	O95747	OXSR1_HUMAN	OXSR1	Serine/threonine-protein kinase OSR1	79835.8	81645.1	79297.8	86039.2	83518.1	80300.6
O95751	O95751	LDOC1_HUMAN	LDOC1	Protein LDOC1
O95757	O95757	HS74L_HUMAN	HSPA4L	Heat shock 70 kDa protein 4L	35348.2	35368.6	37735.2	37658.8	35214.3	35190.3
O95758;O95758-1;O95758-2;O95758-4;O95758-5;O95758-6	O95758;O95758-1;O95758-2;O95758-4;O95758-5;O95758-6;O95758-7	PTBP3_HUMAN	PTBP3	Polypyrimidine tract-binding protein 3	26399	28299.1	25174.3	22606.3	28221.4	25603.5
O95759	O95759;O95759-2	TBCD8_HUMAN	TBC1D8	TBC1 domain family member 8	920.584	1237.35	986.624		1201.71	586.963
O95782;O95782-2	O95782;O95782-2	AP2A1_HUMAN	AP2A1	AP-2 complex subunit alpha-1	60854.4	62444.8	63268.6	65414.3	67718.2	63845.6
O95786	O95786;O95786-2	RIGI_HUMAN	RIGI	Antiviral innate immune response receptor RIG-I	37593.6	36939.9	38172.1	37479.7	35890.9	38414.5
O95793;O95793-2	O95793;O95793-2;O95793-3	STAU1_HUMAN	STAU1	Double-stranded RNA-binding protein Staufen homolog 1	9265.72	7673.18	8781.52	7962.7	9110.55	8499.77
O95801	O95801	TTC4_HUMAN	TTC4	Tetratricopeptide repeat protein 4	16325.4	10238.6	15607	14314.8	14793.3	9128.13
O95816	O95816;O95816-2	BAG2_HUMAN	BAG2	BAG family molecular chaperone regulator 2	7727.62	7833.35	7004.18	7093.35	6077.37	8684.31
O95819-6	O95819;Q8N4C8;Q9UKE5;O95819-2;O95819-3;O95819-4;O95819-5;O95819-6;Q8N4C8-2;Q8N4C8-3;Q8N4C8-4;Q8N4C8-5;Q9UKE5-2;Q9UKE5-3;Q9UKE5-4;Q9UKE5-5;Q9UKE5-6;Q9UKE5-7;Q9UKE5-8	M4K4_HUMAN	MAP4K4	Isoform 6 of Mitogen-activated protein kinase kinase kinase kinase 4	11945.5	12623.2	12662.1	13094	14002	13573.4
O95822;O95822-2	O95822;O95822-2	DCMC_HUMAN	MLYCD	Malonyl-CoA decarboxylase, mitochondrial	3898.64	3227.57	3273.13	3492.06	3655.03	4107.29
O95831	O95831;O95831-3;O95831-5;O95831-2	AIFM1_HUMAN	AIFM1	Apoptosis-inducing factor 1, mitochondrial	55928.7	66251.7	54984.1	57381	55227.1	50959.9
O95835	O95835	LATS1_HUMAN	LATS1	Serine/threonine-protein kinase LATS1	14308.4	14570.7	13540.2	16108.6	13064.6	14176.9
O95861;O95861-3;O95861-4	O95861;O95861-3;O95861-4	BPNT1_HUMAN	BPNT1	3'(2'),5'-bisphosphate nucleotidase 1	2064.34	1838.92	2154.02	2329.19	1969.43	777.203
O95864	O95864;O95864-3	FADS2_HUMAN	FADS2	Acyl-CoA 6-desaturase	27030.6	25768.8	24201.6	24930.4	24283.5	23996.4
O95865	O95865	DDAH2_HUMAN	DDAH2	N(G),N(G)-dimethylarginine dimethylaminohydrolase 2		1555.23	1117.88		1415.34	1639.09
O95876;O95876-3	O95876;O95876-3	FRITZ_HUMAN	WDPCP	WD repeat-containing and planar cell polarity effector protein fritz homolog	12578.1	13142.9	12644.8	15030.9	11460.5	14184.1
O95881	O95881	TXD12_HUMAN	TXNDC12	Thioredoxin domain-containing protein 12		546.047	824.733		421.961
O95897	O95897	NOE2_HUMAN	OLFM2	Noelin-2	3256.41	3487.39	4946.07	17692.8	32767.9	21922.4
O95900	O95900;O95900-2	TRUB2_HUMAN	TRUB2	Pseudouridylate synthase TRUB2, mitochondrial	13739.1	11347.4	12899.6	12294.9	11805.7	13291.2
O95905;O95905-3	O95905;O95905-2;O95905-3	ECD_HUMAN	ECD	Protein ecdysoneless homolog	27762.1	28099.3	25371.8	27349	28824.6	30184.4
O95970;O95970-2;O95970-3	O95970;O95970-2;O95970-3	LGI1_HUMAN	LGI1	Leucine-rich glioma-inactivated protein 1	90294.3	82150	70969	70237.4	86874.2	70640.3
O95983;O95983-2	O95983;O95983-2	MBD3_HUMAN	MBD3	Methyl-CpG-binding domain protein 3	7267.39	7184.8	6161.11	6795.25	6629.73	7415.54
O95989	O95989	NUDT3_HUMAN	NUDT3	Diphosphoinositol polyphosphate phosphohydrolase 1	3558.11		5014.51	3520.33		5324.38
O96000	O96000	NDUBA_HUMAN	NDUFB10	NADH dehydrogenase [ubiquinone] 1 beta subcomplex subunit 10	9570.2	9035.65	8204.7	8115.62	9261.11	11166
O96005	O96005;O96005-3;O96005-4	CLPT1_HUMAN	CLPTM1	Putative lipid scramblase CLPTM1	3932.85	4173.04	3103.85	3013.5	3114.16	3565.94
O96006	O96006	ZBED1_HUMAN	ZBED1	E3 SUMO-protein ligase ZBED1	21928	20875.8	17800.2	19724.2	22990.8	20045.8
O96008	O96008;O96008-2	TOM40_HUMAN	TOMM40	Mitochondrial import receptor subunit TOM40 homolog	13740.9	16719	14547.6	15420.2	14849.7	13429.4
O96013-4	O96013;O96013-2;O96013-3;O96013-4	PAK4_HUMAN	PAK4	Isoform 4 of Serine/threonine-protein kinase PAK 4	24733	21656.9	24194.9	23171.8	24513.7	26492.6
O96017;O96017-12;O96017-9	O96017;O96017-11;O96017-12;O96017-13;O96017-4;O96017-9	CHK2_HUMAN	CHEK2	Serine/threonine-protein kinase Chk2	36108.3	38384.1	39585.3	37301.4	39173.4	42010.4
O96018	O96018	APBA3_HUMAN	APBA3	Amyloid-beta A4 precursor protein-binding family A member 3	4526.84	2021.42	1739.06	2803.27	4370.71	2209.52
O96019	O96019;O96019-2	ACL6A_HUMAN	ACTL6A	Actin-like protein 6A	10826.7	10829.3	10294.7	10244.7	7923.4	10998
O96028	O96028;O96028-3;O96028-5;O96028-6;O96028-7	NSD2_HUMAN	NSD2	Histone-lysine N-methyltransferase NSD2	768.354	1056.8	923.504	857.904	521.858	936.07
P00338	P00338;P00338-3;P00338-4	LDHA_HUMAN	LDHA	L-lactate dehydrogenase A chain	123061	161953	139503	129041	88466	107975
P00367	P00367;P49448;P00367-3	DHE3_HUMAN	GLUD1	Glutamate dehydrogenase 1, mitochondrial	104384	95771.8	95107	96823.6	95746.3	104511
P00374	P00374;P00374-2	DYR_HUMAN	DHFR	Dihydrofolate reductase	290177	279761	293012	274336	274421	313555
P00387;P00387-2;P00387-3	P00387;P00387-2;P00387-3	NB5R3_HUMAN	CYB5R3	NADH-cytochrome b5 reductase 3	3884.14	4888.52	3272.19	3844.96	4156.19	4285.14
P00390;P00390-2;P00390-3;P00390-4;P00390-5	P00390;P00390-2;P00390-3;P00390-4;P00390-5	GSHR_HUMAN	GSR	Glutathione reductase, mitochondrial	5138.74	6713.91	5984.97	4839.19	7327.42	4358.56
P00403	P00403	COX2_HUMAN	MT-CO2	Cytochrome c oxidase subunit 2	38578.9	44129.8	35289.7	30565	30033.3	30903.4
P00491	P00491	PNPH_HUMAN	PNP	Purine nucleoside phosphorylase	17225.4	21299.8	19777.9	20109.3	15141.4	14196.6
P00492	P00492	HPRT_HUMAN	HPRT1	Hypoxanthine-guanine phosphoribosyltransferase	7612.2	7208.86	6408.45	6010.74	6944.56	6932.66
P00505;P00505-2	P00505;P00505-2	AATM_HUMAN	GOT2	Aspartate aminotransferase, mitochondrial	8142.35	6688.4	7489	5628.41	7638.13	5493.61
P00558	P00558;P07205;P00558-2	PGK1_HUMAN	PGK1	Phosphoglycerate kinase 1	38521.5	54896.8	44046.5	40239.2	29415.3	40967.5
P00734	P00734	THRB_HUMAN	F2	Prothrombin	11081.4	11134.4	13543.9	10641.7	11421.6	10943.3
P00736	P00736	C1R_HUMAN	C1R	Complement C1r subcomponent	6511.59	7311.29	3527.27	4314.71	7040.19	3877.88
P00742	P00742	FA10_HUMAN	F10	Coagulation factor X	21753.4	21567.9	31302.8	22480.7	23394.8	28753.7
P00747	P00747;P08519	PLMN_HUMAN	PLG	Plasminogen	6758.18	8888.63	10232.9	6204.83	8009.97	6655.08
P00751	P00751	CFAB_HUMAN	CFB	Complement factor B	3284.14	5065.36	2196.88	2705.95
P00846	P00846	ATP6_HUMAN	MT-ATP6	ATP synthase subunit a	8850.83	15374.2	10709.4	8716.89	7408.38	6406.05
P00918	P00918	CAH2_HUMAN	CA2	Carbonic anhydrase 2	8842.75	9557.85	5346.93	7054	6973.14	6715.3
P00966	P00966	ASSY_HUMAN	ASS1	Argininosuccinate synthase	25146.5	26979.9	21888.6	25437.5	28190.4	24207.1
P00973;P00973-2;P00973-3;P00973-4	P00973;P00973-2;P00973-3;P00973-4	OAS1_HUMAN	OAS1	2'-5'-oligoadenylate synthase 1	16744.7	16603.1	18332.9	14841.9	16784.9	17232.4
P01008	P01008	ANT3_HUMAN	SERPINC1	Antithrombin-III	15604	15894.1	16534.4	14237	14682.2	15513.2
P01023	P01023	A2MG_HUMAN	A2M	Alpha-2-macroglobulin	96038.2	104684	93233.7	100525	74579.7	78794.6
P01024	P01024	CO3_HUMAN	C3	Complement C3	63858.3	54483.2	50925.8	51070	58825.2	43398.4
P01031	P01031	CO5_HUMAN	C5	Complement C5	7527.6	8877.79	8802.3	7328.24	6899.86	7781.21
P01033	P01033	TIMP1_HUMAN	TIMP1	Metalloproteinase inhibitor 1	3635.6	2841.28	2447.72	2700.43	2772.27
P01034	P01034	CYTC_HUMAN	CST3	Cystatin-C	9847.37	10526.4	10929.5	9806.47	12591.3	12797.2
P01042;P01042-2;P01042-3	P01042;P01042-2;P01042-3	KNG1_HUMAN	KNG1	Kininogen-1	40360.9	37530	42472.4	42438.4	44198.6	50615.5
P01111	P01111	RASN_HUMAN	NRAS	GTPase NRas	6343.92	6210.76	5409.77	4781.28	4806.43	3209.13
P01137	P01137	TGFB1_HUMAN	TGFB1	Transforming growth factor beta-1 proprotein	7227.31	6317.93	7364.71	7442.36	7777.51	7903.48
P01591	P01591	IGJ_HUMAN	JCHAIN	Immunoglobulin J chain		4301.5
P01619	P01619	KV320_HUMAN	IGKV3-20	Immunoglobulin kappa variable 3-20	17756.6	13775.2	13446.3	11447.2	14426.6	8053.11
P01764	P01764;P01768;P01772;P01767;A0A0B4J1X5;A0A0C4DH42;P0DP02;P0DP03	HV323_HUMAN	IGHV3-23	Immunoglobulin heavy variable 3-23	14383.6	9915.3	8921.17	9788	13465.8	9366.3
P01772	P01768;P01772;P0DP03	HV333_HUMAN	IGHV3-33	Immunoglobulin heavy variable 3-33	9020.9	7778.23	11394.4	6911.46	9307.43	4949.69
P01834	P01834	IGKC_HUMAN	IGKC	Immunoglobulin kappa constant			542.681		1727.56
P01857;P01857-1	P01857;P01857-1	IGHG1_HUMAN	IGHG1	Immunoglobulin heavy constant gamma 1			2673.29			3687.32
P01859;P01859-1	P01857;P01859;P01857-1;P01859-1	IGHG2_HUMAN	IGHG2	Immunoglobulin heavy constant gamma 2	389996	329853	232342	255730	395002	189489
P01860;P01860-1	P01860;P01860-1	IGHG3_HUMAN	IGHG3	Immunoglobulin heavy constant gamma 3	201877	179146	132015	153694	130495	142929
P01889	P01889;P04439;P04439-2	HLAB_HUMAN	HLA-B	HLA class I histocompatibility antigen, B alpha chain	20944.5	21902.3	20943.2	19903.8	21214.5	23999.8
P02452	P02452	CO1A1_HUMAN	COL1A1	Collagen alpha-1(I) chain	6758.63	7270.5	5493.01	5176.51	7260.91	5296.21
P02533	P02533	K1C14_HUMAN	KRT14	Keratin, type I cytoskeletal 14	103195	112958	153206	90551	53294.2	44627.4
P02538	O95678;P02538;P48668	K2C6A_HUMAN	KRT6A	Keratin, type II cytoskeletal 6A	28483	47561.7	47237.7	19183	10025.5	10624.4
P02545-2	P02545;P02545-2;P02545-3;P02545-4;P02545-5;P02545-6	LMNA_HUMAN	LMNA	Isoform C of Prelamin-A/C	15382.5	12268.5	11827.1	12038.8	12349.7	14948.1
P02647	P02647	APOA1_HUMAN	APOA1	Apolipoprotein A-I	1996.8				4015.1
P02649	P02649	APOE_HUMAN	APOE	Apolipoprotein E	2411.64	1148.75	2331.11	1613.07	1510.04	1995.54
P02656	P02656	APOC3_HUMAN	APOC3	Apolipoprotein C-III	6653.52	6028.92	5419.31	3946.42	4973.95	3859.9
P02675	P02675	FIBB_HUMAN	FGB	Fibrinogen beta chain	8456.75	5379.67	5617.36	6471.03	5463.62	5028.4
P02679;P02679-2	P02679;P02679-2	FIBG_HUMAN	FGG	Fibrinogen gamma chain	7604.99	4032.53	4770.98	3837.51	5387.33	4891.75
P02745	P02745	C1QA_HUMAN	C1QA	Complement C1q subcomponent subunit A	469555	338010	287764	333055	457802	368284
P02746	P02746	C1QB_HUMAN	C1QB	Complement C1q subcomponent subunit B	357995	322273	260276	244435	329437	270268
P02748	P02748	CO9_HUMAN	C9	Complement component C9	21298.9	22636.2	26348.9	27910.5	25908.7	31151.9
P02749	P02749	APOH_HUMAN	APOH	Beta-2-glycoprotein 1	39635.2	40749.2	44894.1	43376.7	42675.1	40357.9
P02751;P02751-1;P02751-17;P02751-3;P02751-5;P02751-6;P02751-7	P02751;P02751-1;P02751-10;P02751-11;P02751-12;P02751-13;P02751-14;P02751-16;P02751-17;P02751-2;P02751-3;P02751-4;P02751-5;P02751-6;P02751-7;P02751-8;P02751-9	FINC_HUMAN	FN1	Fibronectin	15698.9	14675.8	13150.9	13728.2	16171.7	12363.1
P02765	P02765	FETUA_HUMAN	AHSG	Alpha-2-HS-glycoprotein	84629.1	62965.4	74642.7	75411.8	91873.5	91151.5
P02768	P02768	ALBU_HUMAN	ALB	Albumin	3078870	2363800	2135240	2217020	3069000	2016500
P02771	P02771	FETA_HUMAN	AFP	Alpha-fetoprotein	126979	116555	118487	116207	131416	142338
P02774;P02774-2;P02774-3	P02774;P02774-2;P02774-3	VTDB_HUMAN	GC	Vitamin D-binding protein	3092.34	5547.27	1814.99	3074.91	2510.84
P02786	P02786	TFR1_HUMAN	TFRC	Transferrin receptor protein 1	30777.9	29857.8	30679.8	30820.7	27504	30291.4
P02788;P02788-2	P02788;P02788-2	TRFL_HUMAN	LTF	Lactotransferrin	38132.9	38274.2	36751.1	38305.3	34234.2	42223.7
P04004	P04004	VTNC_HUMAN	VTN	Vitronectin	87353.1	82801.3	89848.2	90726.5	85333.7	105327
P04035;P04035-2;P04035-3	P04035;P04035-2;P04035-3	HMDH_HUMAN	HMGCR	3-hydroxy-3-methylglutaryl-coenzyme A reductase		1077.59	980.663		448.019	1442.89
P04040	P04040	CATA_HUMAN	CAT	Catalase	12771.5	13889.6	11128.6	13825.3	9435.43	11690.2
P04049;P04049-2	P04049;P04049-2	RAF1_HUMAN	RAF1	RAF proto-oncogene serine/threonine-protein kinase	15542	17311.5	18622.9	15592.4	14148.9	15775.5
P04062;P04062-2;P04062-4	P04062;P04062-2;P04062-4;P04062-5	GBA1_HUMAN	GBA1	Lysosomal acid glucosylceramidase	4873.05	9316.92	6523	5453.64	6719.34	5762.77
P04075	P04075;P09972;P04075-2	ALDOA_HUMAN	ALDOA	Fructose-bisphosphate aldolase A	24867.6	31568.7	22682	18613	18673.3	22440.4
P04083	P04083	ANXA1_HUMAN	ANXA1	Annexin A1	8145.88	8886.09	9151.12	7697.45	7926.5	10543
P04114	P04114	APOB_HUMAN	APOB	Apolipoprotein B-100	44938.1	43329	45923.5	42175.7	41028	37811.8
P04181	P04181	OAT_HUMAN	OAT	Ornithine aminotransferase, mitochondrial	33874.7	30535.4	29766.8	36773.4	35890.6	36743.8
P04183	P04183	KITH_HUMAN	TK1	Thymidine kinase, cytosolic	34203.3	39578.1	42800.6	33505.8	30343.4	29710.6
P04259	P04259;P48668	K2C6B_HUMAN	KRT6B	Keratin, type II cytoskeletal 6B	6128.53	16298.5	13474	9684.67
P04264	P04259;P04264	K2C1_HUMAN	KRT1	Keratin, type II cytoskeletal 1	636984	837405	1169080	930031	573897	416624
P04278;P04278-2;P04278-3;P04278-4;P04278-5	P04278;P04278-2;P04278-3;P04278-4;P04278-5	SHBG_HUMAN	SHBG	Sex hormone-binding globulin	5796.84	3449.31	5109.35	4411.48	4226.73	4956.39
P04350	P04350;P07437;P68371	TBB4A_HUMAN	TUBB4A	Tubulin beta-4A chain	1546090	1435250	1508840	1564280	1494930	1497750
P04406	P04406;P04406-2	G3P_HUMAN	GAPDH	Glyceraldehyde-3-phosphate dehydrogenase	625251	721613	645733	664424	723664	672422
P04439;P04439-2	P04439;P04439-2	HLAA_HUMAN	HLA-A	HLA class I histocompatibility antigen, A alpha chain	17296.6	12727.4	13899.6	14176.5	14448.8	15813.5
P04632	P04632	CPNS1_HUMAN	CAPNS1	Calpain small subunit 1		3943.06			820.93
P04637;P04637-4	P04637;P04637-2;P04637-3;P04637-4;P04637-5;P04637-6	P53_HUMAN	TP53	Cellular tumor antigen p53	31915.2	38042.4	36456.5	30336.7	31176.1	27988.1
P04792	P04792	HSPB1_HUMAN	HSPB1	Heat shock protein beta-1	218661	178968	193120	193573	220912	234226
P04818	P04818;P04818-2	TYSY_HUMAN	TYMS	Thymidylate synthase	142850	112670	129955	119302	121850	160759
P04843	P04843	RPN1_HUMAN	RPN1	Dolichyl-diphosphooligosaccharide--protein glycosyltransferase subunit 1	17807.1	22710.3	17919.9	18614.4	16741.4	15700.4
P04844;P04844-2	P04844;P04844-2	RPN2_HUMAN	RPN2	Dolichyl-diphosphooligosaccharide--protein glycosyltransferase subunit 2	6515.35	8221.22	7939.25	6882.38	5825.22	5463.77
P04899	P04899;P04899-2;P04899-3;P04899-4;P04899-5;P04899-6	GNAI2_HUMAN	GNAI2	Guanine nucleotide-binding protein G(i) subunit alpha-2	25448.8	26473.8	25448.9	26111.8	23987.5	23690.4
P04908;Q7L7L0;Q93077	P04908;P0C0S8;P20671;Q16777;Q6FI13;Q7L7L0;Q93077;Q96KK5;Q99878;Q9BTM1	H2A1B_HUMAN;H2A1C_HUMAN;H2A3_HUMAN	H2AC25;H2AC4;H2AC6	Histone H2A type 1-B/E	35558.7	26388.7	28338.8	34289.8	34537.5	41534.6
P05023;P05023-4	P05023;P13637;P20648;P50993;P54707;Q13733;P05023-2;P05023-3;P05023-4;P13637-2;P13637-3;P54707-2	AT1A1_HUMAN	ATP1A1	Sodium/potassium-transporting ATPase subunit alpha-1	19085.1	22030.1	19898.3	20336.6	18283.3	22228.2
P05026;P05026-2	P05026;P05026-2	AT1B1_HUMAN	ATP1B1	Sodium/potassium-transporting ATPase subunit beta-1	6387.09	9258.79	8384.58	8014.91	8495.62	8548.91
P05067;P05067-11;P05067-7;P05067-8;P05067-9	P05067;P05067-4;P05067-10;P05067-11;P05067-3;P05067-5;P05067-6;P05067-7;P05067-8;P05067-9	A4_HUMAN	APP	Amyloid-beta precursor protein	7368.76	6243.14	6611.74	7130.46	7427.36	7162.15
P05089;P05089-2	P05089;P05089-2	ARGI1_HUMAN	ARG1	Arginase-1	5633.46	4080.42	5809.07	5489.78	4029.2	2498.76
P05109	P05109	S10A8_HUMAN	S100A8	Protein S100-A8	10010.8	14406.8	77208.9	7515.14	8676.89	9770.17
P05141	P05141;P12235;P12236;Q9H0C2	ADT2_HUMAN	SLC25A5	ADP/ATP translocase 2	88817	97554.1	98691.4	92171.8	95805.8	90486.6
P05155;P05155-2;P05155-3	P05155;P05155-2;P05155-3	IC1_HUMAN	SERPING1	Plasma protease C1 inhibitor	9128.21	7713.51	5826.69	5572.94	6420.14	4127.55
P05156	P05156	CFAI_HUMAN	CFI	Complement factor I	4061.68	3359.17	2769.23	2723.04	3537.73	3037.19
P05161	P05161	ISG15_HUMAN	ISG15	Ubiquitin-like protein ISG15	93386.1	121761	107270	96179	84029.1	78814.7
P05166;P05166-2	P05166;P05166-2	PCCB_HUMAN	PCCB	Propionyl-CoA carboxylase beta chain, mitochondrial	4898.26	4152.54	5286.67	4410.54	4350.49	4319.9
P05186-3	P05186;P05186-2;P05186-3	PPBT_HUMAN	ALPL	Isoform 3 of Alkaline phosphatase, tissue-nonspecific isozyme	4332.51	3814.15	2547.09	3708.49	2906.61	4640.08
P05198	P05198	IF2A_HUMAN	EIF2S1	Eukaryotic translation initiation factor 2 subunit 1	32876.6	39630.3	40229.4	40648.8	41542.9	39460.4
P05386	P05386	RLA1_HUMAN	RPLP1	Large ribosomal subunit protein P1	5129.72	4220.72	5726.12	4341.25	4680.66	9918.89
P05387	P05387	RLA2_HUMAN	RPLP2	Large ribosomal subunit protein P2	15370.5	8919.59	16433.8	8054.59	13922.6	15336.7
P05388	P05388;P05388-2	RLA0_HUMAN	RPLP0	Large ribosomal subunit protein uL10	243793	217665	261859	242133	224366	213967
P05423	P05423	RPC4_HUMAN	POLR3D	DNA-directed RNA polymerase III subunit RPC4	14748.5	8105.47	11757.2	13688	16249.1	17459.6
P05452	P05452	TETN_HUMAN	CLEC3B	Tetranectin	1770.45	2909.1	2781.35	1736.78	2970.7	1430.09
P05455	P05455	LA_HUMAN	SSB	Lupus La protein	8829.42	9479.36	7951.8	7436.36	4891.07	6526.84
P05543	P05543	THBG_HUMAN	SERPINA7	Thyroxine-binding globulin	6052.32	7871.07	8016.65	5491.03	9143.2	6367.51
P05546	P05546	HEP2_HUMAN	SERPIND1	Heparin cofactor 2	14326.7	13548.7	12938.9	11075.9	13582.3	16611.6
P05556;P05556-2;P05556-3;P05556-4;P05556-5	P05556;P05556-2;P05556-5;P05556-3;P05556-4	ITB1_HUMAN	ITGB1	Integrin beta-1	6656.29	6455.28	5649.67	6457.9	5017.28	7187.17
P05783	P05783	K1C18_HUMAN	KRT18	Keratin, type I cytoskeletal 18	10085.8	11360.1	11034.5	10581	14022.5	11643
P05787;P05787-2	P05787;P05787-2	K2C8_HUMAN	KRT8	Keratin, type II cytoskeletal 8	4376.71	3567.7	3834.74	3518.94	4009.2	4270.75
P06280	P06280	AGAL_HUMAN	GLA	Alpha-galactosidase A	6258.8	4018.82	5945.32	6339.69	8158.24	9082.73
P06312	P06312	KV401_HUMAN	IGKV4-1	Immunoglobulin kappa variable 4-1	789574	576391	508109	488900	651258	459915
P06396	P06396;P06396-2;P06396-3;P06396-4	GELS_HUMAN	GSN	Gelsolin	67946.2	62226.1	68230.4	63396.4	62366.8	69485.8
P06400	P06400	RB_HUMAN	RB1	Retinoblastoma-associated protein	125562	120798	120981	128167	120785	109656
P06493	P06493;P06493-2	CDK1_HUMAN	CDK1	Cyclin-dependent kinase 1	101731	94717	94437.2	83759.6	89680	97926
P06576	P06576	ATPB_HUMAN	ATP5F1B	ATP synthase subunit beta, mitochondrial	259724	271146	255795	267446	267294	267552
P06702	P06702	S10A9_HUMAN	S100A9	Protein S100-A9	5712.92	6908.47	45867.3	4018.96	4146.12	5113.64
P06730;P06730-2;P06730-3	P06730;P06730-2;P06730-3	IF4E_HUMAN	EIF4E	Eukaryotic translation initiation factor 4E	37032.1	29388.3	33813.2	35049.6	34961.3	37222.6
P06733	P06733;P06733-2	ENOA_HUMAN	ENO1	Alpha-enolase	30217.8	30281.8	31402.1	28476.8	30640.9	28788.2
P06737;P06737-2	P06737;P06737-2	PYGL_HUMAN	PYGL	Glycogen phosphorylase, liver form	15577.3	18677.8	17073.7	15617	13523.4	14075.9
P06744;P06744-2	P06744;P06744-2	G6PI_HUMAN	GPI	Glucose-6-phosphate isomerase	16880.8	16235.8	15426.8	16636.4	14362.4	16090.6
P06748;P06748-2	P06748;P06748-2;P06748-3	NPM_HUMAN	NPM1	Nucleophosmin	35203.4	45377.8	38433.3	30559.3	31978.6	30527.1
P06753-2;P06753-5	P06753-2;P06753-5;P06753-7	TPM3_HUMAN	TPM3	Isoform 2 of Tropomyosin alpha-3 chain	7912.07	6390.19	6422.67	6371.16	7611.49	9339.19
P06865	P06865	HEXA_HUMAN	HEXA	Beta-hexosaminidase subunit alpha		3454.99	2017.42	2955.75		2604.43
P06899;P23527;P33778;Q16778;Q8N257	O60814;P06899;P23527;P33778;P57053;P58876;P62807;Q16778;Q5QNW6;Q8N257;Q93079;Q96A08;Q99877;Q99879;Q99880;Q5QNW6-2	H2B1B_HUMAN;H2B1J_HUMAN;H2B1O_HUMAN;H2B2E_HUMAN;H2B3B_HUMAN	H2BC11;H2BC17;H2BC21;H2BC26;H2BC3	Histone H2B type 1-J	310920	314027	349626	320839	329787	440270
P07195	P00338;P07195;P07864;Q6ZMR3;P00338-3;P00338-2;P00338-4;P00338-5	LDHB_HUMAN	LDHB	L-lactate dehydrogenase B chain	195067	302214	213763	218098	194166	188191
P07237	P07237	PDIA1_HUMAN	P4HB	Protein disulfide-isomerase	10627.4	10186.2	8726.7	8834.88	7594.78	8982.79
P07339	P07339	CATD_HUMAN	CTSD	Cathepsin D	49122.7	43766.7	47947.8	50079	53001.5	51924.3
P07355;P07355-2	A6NMY6;P07355;P07355-2	ANXA2_HUMAN	ANXA2	Annexin A2	28339.6	44348	32834.8	29821.8	23741.6	27629.1
P07358	P07358	CO8B_HUMAN	C8B	Complement component C8 beta chain	9557.08	11517.1	11246	14409.2	12281.2	10604.2
P07384	P07384	CAN1_HUMAN	CAPN1	Calpain-1 catalytic subunit	9802.69	10098.6	9179.65	10047	9616.21	10671.7
P07437	P07437	TBB5_HUMAN	TUBB	Tubulin beta chain	2634390	2587340	2531420	2428830	2394830	2430800
P07477	P07477	TRY1_HUMAN	PRSS1	Serine protease 1	1782070	1736160	1494150	1324360	1779480	966346
P07602;P07602-2;P07602-3	P07602;P07602-2;P07602-3	SAP_HUMAN	PSAP	Prosaposin	447.701	1190.73		361.095
P07686	P07686	HEXB_HUMAN	HEXB	Beta-hexosaminidase subunit beta	12025.5	11708.1	11836.6	11618.3	12275.4	13537.8
P07737	P07737	PROF1_HUMAN	PFN1	Profilin-1	91384.4	108482	85828.8	87730.8	74940.9	76489.9
P07741	P07741	APT_HUMAN	APRT	Adenine phosphoribosyltransferase	113705	131074	125651	115170	138025	116556
P07814	P07814	SYEP_HUMAN	EPRS1	Bifunctional glutamate/proline--tRNA ligase	192200	184356	203602	221980	223438	232019
P07858	P07858	CATB_HUMAN	CTSB	Cathepsin B	39369.8	40959.9	47495.4	44161.6	47013.8	41240.2
P07900;P07900-2	P07900;P07900-2	HS90A_HUMAN	HSP90AA1	Heat shock protein HSP 90-alpha	278277	304083	303224	264823	244584	313619
P07910;P07910-2	O60812;P07910;B2RXH8;B7ZW38;P07910-2;P07910-3;P07910-4;P0DMR1	HNRPC_HUMAN	HNRNPC	Heterogeneous nuclear ribonucleoproteins C1/C2	98068.4	100739	95724.4	102961	96827.9	96011.1
P07942	P07942	LAMB1_HUMAN	LAMB1	Laminin subunit beta-1	7038.03	6699	5778.97	5469.52	6632.56	7120.1
P07947	P07947	YES_HUMAN	YES1	Tyrosine-protein kinase Yes	3352.54	4147.91	4537.08	4630.17	5441.78	4278.35
P07948-2	P07948;P08631;P08631-2;P07948-2;P08631-3;P08631-4	LYN_HUMAN	LYN	Isoform 2 of Tyrosine-protein kinase Lyn	6553.39	7762.54	6584.07	5828.74	6614.79	7155.49
P07954;P07954-2	P07954;P07954-2	FUMH_HUMAN	FH	Fumarate hydratase, mitochondrial	30266.4	28562.2	30091.5	29312.5	30880.3	28611.9
P07992;P07992-4	P07992;P07992-3;P07992-4	ERCC1_HUMAN	ERCC1	DNA excision repair protein ERCC-1	3532	4215.71	4203.95	5226.75	4970.14	3403.23
P07996	P07996;P07996-2	TSP1_HUMAN	THBS1	Thrombospondin-1	21869.7	21064.7	20352.2	19448.4	21057.4	22280.5
P08047;P08047-2;P08047-3	P08047;P08047-2;P08047-3	SP1_HUMAN	SP1	Transcription factor Sp1	7898.11	11074.3	9642.49	9542.88	11510.5	8849.77
P08133;P08133-2	P08133;P08133-2	ANXA6_HUMAN	ANXA6	Annexin A6	4005.6	3993.69	3261.96	3241.71	2986.17	3149.69
P08134	P08134	RHOC_HUMAN	RHOC	Rho-related GTP-binding protein RhoC	7894.26	9373.21	8156.32	8071.5	11382.3	8892.51
P08195;P08195-2;P08195-3;P08195-4;P08195-5	P08195;P08195-4;P08195-2;P08195-3;P08195-5	4F2_HUMAN	SLC3A2	Amino acid transporter heavy chain SLC3A2	16255.6	16772	17806.3	15580.9	14065.3	19646.3
P08235;P08235-3;P08235-4	P08235;P08235-3;P08235-4	MCR_HUMAN	NR3C2	Mineralocorticoid receptor	1354.77	4091.14	2919.93	2468.58
P08236;P08236-2;P08236-3	P08236;P08236-2;P08236-3	BGLR_HUMAN	GUSB	Beta-glucuronidase		3970.68	3542.88	3033.68	2465.25	5315.6
P08237;P08237-3	P08237;P08237-2;P08237-3	PFKAM_HUMAN	PFKM	ATP-dependent 6-phosphofructokinase, muscle type	61992.7	66129.5	67080	66831.6	63095	63460.7
P08238	P07900;P08238;Q14568;Q58FF8;P07900-2	HS90B_HUMAN	HSP90AB1	Heat shock protein HSP 90-beta	1189780	1248840	1245580	1181150	1070180	1266130
P08240	P08240;P08240-2	SRPRA_HUMAN	SRPRA	Signal recognition particle receptor subunit alpha	35489.8	37244.9	32133	34541.2	35036.4	37360.4
P08243;P08243-2	P08243;P08243-2;P08243-3	ASNS_HUMAN	ASNS	Asparagine synthetase [glutamine-hydrolyzing]	145858	147439	148357	152632	147137	150656
P08311	P08311	CATG_HUMAN	CTSG	Cathepsin G
P08397;P08397-2	P08397;P08397-2;P08397-3;P08397-4	HEM3_HUMAN	HMBS	Porphobilinogen deaminase	8912.46	8436.98	9080	9690.56	8968.29	13232.7
P08559;P08559-2;P08559-3;P08559-4	P08559;P29803;P08559-2;P08559-3;P08559-4	ODPA_HUMAN	PDHA1	Pyruvate dehydrogenase E1 component subunit alpha, somatic form, mitochondrial	104169	107798	111826	116808	117725	132400
P08574	P08574	CY1_HUMAN	CYC1	Cytochrome c1, heme protein, mitochondrial	3439.77	4530.69	4526.87	5420.35	2728.14	4294.87
P08579	P08579	RU2B_HUMAN	SNRPB2	U2 small nuclear ribonucleoprotein B''	2308.81	1339.99	1501.36	1229.18	1517.43	1713.35
P08581;P08581-2	P08581;P08581-2	MET_HUMAN	MET	Hepatocyte growth factor receptor	3458.3	4106.66	5706.31	4298.15	5119.71	4703.72
P08621;P08621-2	P08621;P08621-2;P08621-3	RU17_HUMAN	SNRNP70	U1 small nuclear ribonucleoprotein 70 kDa	5427.84	7696.86	4690.74	4493.24	5418.74	5201.34
P08670	P08670	VIME_HUMAN	VIM	Vimentin	274233	244392	276806	280183	275509	279145
P08697;P08697-2	P08697;P08697-2	A2AP_HUMAN	SERPINF2	Alpha-2-antiplasmin	22022.5	27889	27642.6	23732.8	21893.1	20693.2
P08708	P08708	RS17_HUMAN	RPS17	Small ribosomal subunit protein eS17	48304.3	53673.2	58065.1	53640.4	49984.8	48869.5
P08727	P08727	K1C19_HUMAN	KRT19	Keratin, type I cytoskeletal 19
P08729	P08729;Q14CN4;Q14CN4-2;Q14CN4-3	K2C7_HUMAN	KRT7	Keratin, type II cytoskeletal 7	10245	7224.36	6195.93			5273.02
P08754	P08754	GNAI3_HUMAN	GNAI3	Guanine nucleotide-binding protein G(i) subunit alpha-3	31217	27055.5	31230.5	31530.7	38004.4	37135
P08758	P08758	ANXA5_HUMAN	ANXA5	Annexin A5	4648.62	7627.88	5042.04	4589.89	2752.76	4217.57
P08779	P08779	K1C16_HUMAN	KRT16	Keratin, type I cytoskeletal 16	20757.5	11257.9	11627.9	10499.5	8527.48	5190.64
P08865	P08865;A0A8I5KQE6	RSSA_HUMAN	RPSA	Small ribosomal subunit protein uS2	118700	150596	177987	120723	134650	138909
P09001	P09001	RM03_HUMAN	MRPL3	Large ribosomal subunit protein uL3m	5947.78	5172.71	4653.17	6929.57	4653.2	8475.33
P09104;P09104-2	P09104;P09104-2	ENOG_HUMAN	ENO2	Gamma-enolase		3915.89	1847.61	2839.95		4250.92
P09110	P09110	THIK_HUMAN	ACAA1	3-ketoacyl-CoA thiolase, peroxisomal	12711.8	9040.79	13173.9	13654.1	13132.5	14539
P09132	P09132	SRP19_HUMAN	SRP19	Signal recognition particle 19 kDa protein	6534.05	8484.38	7130.97	7871.12	8773.71	8837.6
P09211	P09211	GSTP1_HUMAN	GSTP1	Glutathione S-transferase P	37554.4	43919.9	38055.1	35420.3	33707.1	39001.9
P09417	P09417;P09417-2	DHPR_HUMAN	QDPR	Dihydropteridine reductase	13155.8	15038.6	15291.7	15394.2	19365.4	14688.5
P09429	P09429;B2RPK0	HMGB1_HUMAN	HMGB1	High mobility group protein B1	7438.52	10861.3	4623.5	5574.72	4283.46	4687.56
P09471-2	P09471;P09471-2	GNAO_HUMAN	GNAO1	Isoform Alpha-2 of Guanine nucleotide-binding protein G(o) subunit alpha	4940.67	6097.14	5429.28	5504.91	6085.72	5535.78
P09493-5	P09493-5	TPM1_HUMAN	TPM1	Isoform 5 of Tropomyosin alpha-1 chain						3123.92
P09543;P09543-2	P09543;P09543-2	CN37_HUMAN	CNP	2',3'-cyclic-nucleotide 3'-phosphodiesterase	29232.5	25554.6	23847.1	25255.9	25350.9	22000.5
P09622;P09622-3	P09622;P09622-2;P09622-3	DLDH_HUMAN	DLD	Dihydrolipoyl dehydrogenase, mitochondrial	4751.76	6451.97	3771.1	6302.03	6781.74	4819.55
P09651;P09651-2;P09651-3	P09651;P09651-2;P09651-3	ROA1_HUMAN	HNRNPA1	Heterogeneous nuclear ribonucleoprotein A1	29001.5	33416.4	22554.8	24913.8	24055.8	30423.9
P09661	P09661	RU2A_HUMAN	SNRPA1	U2 small nuclear ribonucleoprotein A'	59598.6	56622.3	61638.7	68401.8	64879.1	52974.5
P09874	P09874	PARP1_HUMAN	PARP1	Poly [ADP-ribose] polymerase 1	93269.9	92875.9	94301.4	107384	97477.1	108668
P09884	P09884	DPOLA_HUMAN	POLA1	DNA polymerase alpha catalytic subunit	15262.4	15591.6	16047.4	15521.1	14441.1	16576.2
P09913	P09913	IFIT2_HUMAN	IFIT2	Interferon-induced protein with tetratricopeptide repeats 2	1437.09	1427.08				778.599
P09914;P09914-2	P09914;P09914-2	IFIT1_HUMAN	IFIT1	Interferon-induced protein with tetratricopeptide repeats 1	54074.8	53553.9	49808.4	49119.2	47602.5	47931
P09936	P09936	UCHL1_HUMAN	UCHL1	Ubiquitin carboxyl-terminal hydrolase isozyme L1	39352.5	50578.1	40433.5	952136	1245370	809940
P09960	P09960;P09960-2;P09960-3;P09960-4	LKHA4_HUMAN	LTA4H	Leukotriene A-4 hydrolase	11700.9	16268.3	12980.8	15022	11972.5	10716.8
P0C0L4	P0C0L4;P0C0L5;P0C0L4-2	CO4A_HUMAN	C4A	Complement C4-A	43108.1	42899.8	43632.5	45148.6	45743.6	37554.3
P0C0S5;Q71UI9;Q71UI9-2;Q71UI9-4	P0C0S5;Q71UI9;Q71UI9-2;Q71UI9-4	H2AV_HUMAN;H2AZ_HUMAN	H2AZ1;H2AZ2	Histone H2A.Z	1977.14	1017.27	1550.46	1865.94	2061.72	2426.16
P0CB38	P0CB38	PAB4L_HUMAN	PABPC4L	Polyadenylate-binding protein 4-like	3209.23	4434.52	3276.41	4823.4	2547.78	3582.51
P0CE72	P0CE72;P0CE71	ONCO_HUMAN	OCM	Oncomodulin-1		9298.68		10883.1	8144.65
P0CK96	P0CK96	S352B_HUMAN	SLC35E2B	Solute carrier family 35 member E2B		748.944		166.38
P0DI81;P0DI81-3;P0DI82	P0DI81;P0DI82;P0DI81-3	TPC2A_HUMAN;TPC2B_HUMAN	TRAPPC2;TRAPPC2B	Trafficking protein particle complex subunit 2	2787.41	2316.63	2673.75		3263.12	2088.75
P0DME0	P0DME0;Q01105;Q01105-2;Q01105-3;Q01105-4	SETLP_HUMAN	SETSIP	Protein SETSIP	4618.82	12368.8	4754.75	3629.5	4336.27	3455.81
P0DMM9;P0DMM9-3;P0DMN0	P0DMM9;P0DMN0;P50225;P50226;P0DMM9-3;P50225-2	ST1A3_HUMAN;ST1A4_HUMAN	SULT1A3;SULT1A4	Sulfotransferase 1A3	30786	30164.9	28976.9	28469.5	29749.7	32365.9
P0DMV8;P0DMV9	P0DMV8;P0DMV9;P34931;P0DMV8-2	HS71A_HUMAN;HS71B_HUMAN	HSPA1A;HSPA1B	Heat shock 70 kDa protein 1A	82517.2	79150.8	80041.1	86575	85473.1	87726.6
P0DP01	P01742;P01743;A0A0B4J2H0;A0A0C4DH29;P0DP01	HV108_HUMAN	IGHV1-8	Immunoglobulin heavy variable 1-8	13425.7	12627.7	11168.1	9879.37	12523	10131.7
P0DP23;P0DP24;P0DP25	P0DP23;P0DP24;P0DP25	CALM1_HUMAN;CALM2_HUMAN;CALM3_HUMAN	CALM1;CALM2;CALM3	Calmodulin-1	5686.57	3031.7	3165.79	3573.22	3944.92	3192.79
P0DPB6	P0DPB6	RPAC2_HUMAN	POLR1D	DNA-directed RNA polymerases I and III subunit RPAC2	49137.7	37245.1	45965	41153.4	57860.6	48495.3
P0DPH7;P0DPH7-2;P0DPH8;Q6PEY2	P0DPH7;P0DPH8;Q6PEY2;Q71U36;P0DPH7-2;Q71U36-2	TBA3C_HUMAN;TBA3D_HUMAN;TBA3E_HUMAN	TUBA3C;TUBA3D;TUBA3E	Tubulin alpha-3C chain	148261	162487	153535	150549	131228	61562.6
P0DTE7;P0DTE8;P0DUB6;P19961;P19961-2	P04746;P0DTE7;P0DTE8;P0DUB6;P19961;P19961-2;P04746-2	AMY1A_HUMAN;AMY1B_HUMAN;AMY1C_HUMAN;AMY2B_HUMAN	AMY1A;AMY1B;AMY1C;AMY2B	Alpha-amylase 1B	8033.98	6696.85	6862.21	7681.5	7502.87	9098.46
P0DTL6	P0DTL6;P0DTL6-1;P0DTL6-2	ZTRF1_HUMAN	ZFTRAF1	Zinc finger TRAF-type-containing protein 1	978.129	1511.64	1288.86	1767.28	1710.68	765.038
P10155	P10155;P10155-3;P10155-4;P10155-5	RO60_HUMAN	RO60	RNA-binding protein RO60	19999.2	19877.5	18794.8	22753.1	22482.8	22446.8
P10321	P10321;P10321-2	HLAC_HUMAN	HLA-C	HLA class I histocompatibility antigen, C alpha chain	31069.1	31681.8	35098.5	32630.3	29868	26805.7
P10398	P10398	ARAF_HUMAN	ARAF	Serine/threonine-protein kinase A-Raf	62358	62167.5	60349	65075.3	60402.9	59968.2
P10412	P10412;P16402;P16403	H14_HUMAN	H1-4	Histone H1.4	245425	178900	191757	183279	228896	216954
P10515	P10515	ODP2_HUMAN	DLAT	Dihydrolipoyllysine-residue acetyltransferase component of pyruvate dehydrogenase complex, mitochondrial	28570.5	31113.3	29160.9	29516.1	25253.1	30090.4
P10586;P10586-2	P10586;P23468;Q13332;P10586-2;P23468-2;P23468-3;P23468-4;P23468-5;P23468-6;P23468-7;Q13332-2;Q13332-3;Q13332-4;Q13332-5;Q13332-6;Q13332-7	PTPRF_HUMAN	PTPRF	Receptor-type tyrosine-protein phosphatase F	16008	14849.8	13716.8	15232.5	14651.9	13872.6
P10588	P10588	NR2F6_HUMAN	NR2F6	Nuclear receptor subfamily 2 group F member 6	3840.69	2792.6	5157.36	4398.43	3970.47	3134.04
P10589	P10589;P24468;P24468-2;P24468-3	COT1_HUMAN	NR2F1	COUP transcription factor 1	1768.27	1723.96	2606.36	2253.97	1725.2	2079.46
P10599;P10599-2	P10599;P10599-2	THIO_HUMAN	TXN	Thioredoxin	7306.02	7861.44	8025.64	6555	6789.5	2258.96
P10619;P10619-2	P10619;P10619-2	PPGB_HUMAN	CTSA	Lysosomal protective protein	10589.1	10906.6	11398.2	10517.3	10702.4	11059.5
P10620	P10620;P10620-2	MGST1_HUMAN	MGST1	Microsomal glutathione S-transferase 1	8858.69	10020.6	8016.07	9267.17	9980.03	7299.81
P10643	P10643	CO7_HUMAN	C7	Complement component C7	23740.4	22054.4	27210.4	22985.5	20861.2	28184.9
P10644	P10644	KAP0_HUMAN	PRKAR1A	cAMP-dependent protein kinase type I-alpha regulatory subunit	31500.5	33660.7	34564.6	37858.5	43700.4	39696.5
P10768	P10768	ESTD_HUMAN	ESD	S-formylglutathione hydrolase	4557.34	3678.24	1361.66	1722.34	3134.29	3640.48
P10809	P10809;P10809-2	CH60_HUMAN	HSPD1	60 kDa heat shock protein, mitochondrial	3174770	2528180	2739140	2882240	3371600	2865200
P11021	P11021	BIP_HUMAN	HSPA5	Endoplasmic reticulum chaperone BiP	97589.5	90688.4	88927.9	94798.1	98340.4	103395
P11047	P11047	LAMC1_HUMAN	LAMC1	Laminin subunit gamma-1	7883.85	8001.6	7816.65	8230.5	8920.66	9327.03
P11142	P11142;P54652;P11142-2	HSP7C_HUMAN	HSPA8	Heat shock cognate 71 kDa protein	647700	608126	600033	629459	619227	672152
P11166	P11166	GTR1_HUMAN	SLC2A1	Solute carrier family 2, facilitated glucose transporter member 1	8770.14	6456.5	5249.85	9058.29	6387.03	7748.41
P11171;P11171-2	P11171;P11171-2;P11171-3;P11171-4;P11171-5;P11171-6	EPB41_HUMAN	EPB41	Protein 4.1	15590.8	13736.6	14449.3	16956	15996.4	19753.2
P11172	P11172;P11172-3	UMPS_HUMAN	UMPS	Uridine 5'-monophosphate synthase	66814.3	68564.5	68520.3	68192.4	68783.6	63120.8
P11177;P11177-2	P11177;P11177-2;P11177-3	ODPB_HUMAN	PDHB	Pyruvate dehydrogenase E1 component subunit beta, mitochondrial	51491	53188.5	49840.9	59179.7	56885	53543.1
P11182	P11182	ODB2_HUMAN	DBT	Lipoamide acyltransferase component of branched-chain alpha-keto acid dehydrogenase complex, mitochondrial	2293.34	1843.55	2688.85	1743.67	2757.41	3279.04
P11216	P11216;P11217	PYGB_HUMAN	PYGB	Glycogen phosphorylase, brain form	38986.9	43246.4	40106.4	41615.4	41104.8	40664.8
P11217-2	P11217;P11217-2	PYGM_HUMAN	PYGM	Isoform 2 of Glycogen phosphorylase, muscle form					6714.71
P11277;P11277-2;P11277-3	P11277;P11277-2;P11277-3	SPTB1_HUMAN	SPTB	Spectrin beta chain, erythrocytic	3233.33	3597.45	4303.63	5777.87	3574.06	3454.45
P11279;P11279-2	P11279;P11279-2	LAMP1_HUMAN	LAMP1	Lysosome-associated membrane glycoprotein 1	2178.2	2419.66	2434.78	2297.77	771.851	2499.53
P11310;P11310-2	P11310;P11310-2	ACADM_HUMAN	ACADM	Medium-chain specific acyl-CoA dehydrogenase, mitochondrial	125204	116109	110156	123607	114686	101783
P11387	P11387	TOP1_HUMAN	TOP1	DNA topoisomerase 1	29505.5	52284.9	26973.8	26305	30159.9	25882.6
P11388;P11388-2;P11388-3;P11388-4	P11388;P11388-2;P11388-3;P11388-4	TOP2A_HUMAN	TOP2A	DNA topoisomerase 2-alpha	23203.2	24600.9	21036.5	22255.1	20203.7	21457.5
P11413;P11413-2;P11413-3	P11413;P11413-2;P11413-3	G6PD_HUMAN	G6PD	Glucose-6-phosphate 1-dehydrogenase	64962	58787.3	70420.7	68283.9	65676.8	71664.2
P11474;P11474-2	O95718;P11474;O95718-1;O95718-2;P11474-2	ERR1_HUMAN	ESRRA	Steroid hormone receptor ERR1	9073.85	5695.96	5457.6	8102.78	7751.11	6821.24
P11498	P11498;P11498-2	PYC_HUMAN	PC	Pyruvate carboxylase, mitochondrial	6057.43	5443.25	3553.72	4552.31		1490.87
P11532-16;P11532-9	P11532-5;P11532-14;P11532-15;P11532-16;P11532-6;P11532-9	DMD_HUMAN	DMD	Isoform 10 of Dystrophin
P11532;P11532-11;P11532-4	P11532;P11532-11;P11532-2;P11532-3;P11532-4	DMD_HUMAN	DMD	Dystrophin	4689.77	5763.03	5249.76	5209.44	6050.17	5431.64
P11586	P11586	C1TC_HUMAN	MTHFD1	C-1-tetrahydrofolate synthase, cytoplasmic	231570	226733	230060	247866	261205	234704
P11717	P11717	MPRI_HUMAN	IGF2R	Cation-independent mannose-6-phosphate receptor	37559.7	35657.3	38963	31836.5	35041.9	33807.7
P11766	P11766	ADHX_HUMAN	ADH5	Alcohol dehydrogenase class-3	60351.3	65418.5	63243.8	65112.4	65132.5	59428.9
P11802	P11802	CDK4_HUMAN	CDK4	Cyclin-dependent kinase 4	108860	111663	120117	109726	102814	114521
P11908;P11908-2	P11908;P21108;P60891;P11908-2;P60891-2	PRPS2_HUMAN	PRPS2	Ribose-phosphate pyrophosphokinase 2	32150.2	38511.7	36428.9	37358	35984	35020.9
P11940	P11940;Q4VXU2;P11940-2;Q4VXU2-2	PABP1_HUMAN	PABPC1	Polyadenylate-binding protein 1	654510	568371	681453	777219	768162	853950
P12004	P12004	PCNA_HUMAN	PCNA	Proliferating cell nuclear antigen	34889.7	37218.5	33602.3	32769.4	34369.8	32839.2
P12081;P12081-4	P12081;P49590;P12081-2;P12081-3;P12081-4;P49590-2	HARS1_HUMAN	HARS1	Histidine--tRNA ligase, cytoplasmic	21710.8	24716.7	23038.5	27643.5	25433.4	23100.3
P12107;P12107-2;P12107-3;P12107-4	P12107;P12107-2;P12107-3;P12107-4	COBA1_HUMAN	COL11A1	Collagen alpha-1(XI) chain	2299.81	1113.44	1873.17	2220.69	1860.02	3145.45
P12109	P12109	CO6A1_HUMAN	COL6A1	Collagen alpha-1(VI) chain	56856.8	50951.7	55962.3	57413.6	55255.4	58518.9
P12110	P12110;P12110-2;P12110-3	CO6A2_HUMAN	COL6A2	Collagen alpha-2(VI) chain	13913.3	13145.1	13524.3	14242.7	13411.4	12969.1
P12111;P12111-2;P12111-4	P12111;P12111-2;P12111-4	CO6A3_HUMAN	COL6A3	Collagen alpha-3(VI) chain	4700.69	7461.56	5429.79	5301.19	6023.93	5620.14
P12235	P12235	ADT1_HUMAN	SLC25A4	ADP/ATP translocase 1	4062.31	4112.08	3750.62	4490.44	3172.07	2501.26
P12236	P12235;P12236	ADT3_HUMAN	SLC25A6	ADP/ATP translocase 3	12531.2	14664.7	14596.2	15116.9	13757.1	13849.4
P12259	P12259	FA5_HUMAN	F5	Coagulation factor V	17063.9	17836.1	18932.9	17536.4	17048.1	17793.2
P12268	P12268	IMDH2_HUMAN	IMPDH2	Inosine-5'-monophosphate dehydrogenase 2	66538.8	64557.4	69536.3	69406.8	66555.7	70528.4
P12270	P12270	TPR_HUMAN	TPR	Nucleoprotein TPR	18632.7	15836.5	16939.2	19215.6	16973.8	19796.9
P12273	P12273	PIP_HUMAN	PIP	Prolactin-inducible protein		1006.43	1038.35	857.752	870.843
P12277	P12277	KCRB_HUMAN	CKB	Creatine kinase B-type	97441.1	112297	111615	96454.6	95299.9	92073.1
P12532	P12532;P12532-2	KCRU_HUMAN	CKMT1A	Creatine kinase U-type, mitochondrial	10912.7	9310.27	12372.6	9161.48	12002.4	10490
P12694	P12694;P12694-2	ODBA_HUMAN	BCKDHA	2-oxoisovalerate dehydrogenase subunit alpha, mitochondrial	41393.4	38678	37636.6	44046.7	44321	46595.1
P12814;P12814-2;P12814-3;P12814-4	P12814;P12814-2;P12814-3;P12814-4	ACTN1_HUMAN	ACTN1	Alpha-actinin-1	14481.4	16282.1	17670.6	12478.1	16951.6	18361.8
P12931;P12931-2;P12931-3	P06241;P06241-3;P07947;P12931;P06241-2;P12931-2;P12931-3	SRC_HUMAN	SRC	Proto-oncogene tyrosine-protein kinase Src	18710.4	19319.9	20317.2	22104.3	24356.9	20181.8
P12955;P12955-3	P12955;P12955-2;P12955-3	PEPD_HUMAN	PEPD	Xaa-Pro dipeptidase	3242.62	2743.3	4128.81	3370.31	3423.92	2551.39
P12956	P12956;P12956-2	XRCC6_HUMAN	XRCC6	X-ray repair cross-complementing protein 6	173675	158467	168466	179422	188708	185915
P13010	P13010	XRCC5_HUMAN	XRCC5	X-ray repair cross-complementing protein 5	121640	111031	107346	122592	135203	125462
P13051	P13051	UNG_HUMAN	UNG	Uracil-DNA glycosylase	4640.99	4087.93	4314.74	4976.53	2661.1	6124.51
P13056	P13056;P13056-2;P13056-3	NR2C1_HUMAN	NR2C1	Nuclear receptor subfamily 2 group C member 1	4015.8	3756.25	3661.04	3776.78	3315.01	4122.53
P13073	P13073	COX41_HUMAN	COX4I1	Cytochrome c oxidase subunit 4 isoform 1, mitochondrial	15237.6	12263.2	14745.1	17078.2	11868.6	15133.4
P13196	P13196	HEM1_HUMAN	ALAS1	5-aminolevulinate synthase, non-specific, mitochondrial	8725.81	9695.64	7760.06	8222.32	9228.55	9043.02
P13284	P13284	GILT_HUMAN	IFI30	Gamma-interferon-inducible lysosomal thiol reductase	982.47	3082.05	2507.23	2321.18	3008.44	2405.29
P13473;P13473-2;P13473-3	P13473;P13473-2;P13473-3	LAMP2_HUMAN	LAMP2	Lysosome-associated membrane glycoprotein 2	2850.69	2498.09	2838.24	2854.72	2167.87	1517.95
P13489	P13489	RINI_HUMAN	RNH1	Ribonuclease inhibitor	113818	123666	135789	111078	122235	123139
P13535;Q9UKX2;Q9UKX2-2	P13535;Q9UKX2;Q9UKX2-2	MYH2_HUMAN;MYH8_HUMAN	MYH2;MYH8	Myosin-8	26941.3	22617.8	19119	25953.1	36087.6	37156.6
P13639	P13639	EF2_HUMAN	EEF2	Elongation factor 2	221247	280740	255737	232662	225324	215508
P13645	P13645	K1C10_HUMAN	KRT10	Keratin, type I cytoskeletal 10	251622	462918	815789	578447	212026	224905
P13646;P13646-3	P13646;P13646-3	K1C13_HUMAN	KRT13	Keratin, type I cytoskeletal 13
P13647	P13647	K2C5_HUMAN	KRT5	Keratin, type II cytoskeletal 5	41681	69984	99472.9	50205.8	31227.4	31366.8
P13667	P13667	PDIA4_HUMAN	PDIA4	Protein disulfide-isomerase A4	13684	15497.7	11600.1	12901.4	11531.2	13247.1
P13674	P13674;P13674-2;P13674-3	P4HA1_HUMAN	P4HA1	Prolyl 4-hydroxylase subunit alpha-1	22006	21438.6	24036.3	22707.3	22195.1	24697.5
P13674-2;P13674-3	P13674-2;P13674-3	P4HA1_HUMAN	P4HA1	Isoform 2 of Prolyl 4-hydroxylase subunit alpha-1	846.736	1047.45	1080.39	997.756	1273.86	2098.81
P13693	P13693;P13693-2;Q56UQ5	TCTP_HUMAN	TPT1	Translationally-controlled tumor protein	10357.2	11674.4	11367.5	7985.87	8649.65	9683.5
P13797;P13797-2;P13797-3	P13797;P13797-2;P13797-3	PLST_HUMAN	PLS3	Plastin-3	15211.7	9108.45	13581.7	11171.6	12615.5	14488.1
P13798	P13798	ACPH_HUMAN	APEH	Acylamino-acid-releasing enzyme	12857.3	12694.9	11882.9	9898.85	9290.67	10623.2
P13804	P13804;P13804-2	ETFA_HUMAN	ETFA	Electron transfer flavoprotein subunit alpha, mitochondrial	822301	741381	769598	827396	958496	785523
P13805;P13805-2;P13805-3;P45379;P45379-10;P45379-11;P45379-2;P45379-3;P45379-4;P45379-5;P45379-6;P45379-7;P45379-8	P13805;P45379;P45379-11;P13805-3;P45379-10;P45379-2;P45379-3;P45379-4;P45379-5;P45379-6;P45379-7;P45379-8;P13805-2	TNNT1_HUMAN;TNNT2_HUMAN	TNNT1;TNNT2	Troponin T, slow skeletal muscle	14349.6	10030.9	11661.6	12017.9	12580	12726.9
P13807;P13807-2	P13807;P13807-2	GYS1_HUMAN	GYS1	Glycogen [starch] synthase, muscle	23293.9	23904.5	25418.8	24752.8	27039.7	29312
P13861;P13861-2	P13861;P13861-2	KAP2_HUMAN	PRKAR2A	cAMP-dependent protein kinase type II-alpha regulatory subunit	23773.9	23617.6	23659	22030.6	21766	22291.5
P13929;P13929-2	P13929;P13929-2;P13929-3	ENOB_HUMAN	ENO3	Beta-enolase	8742.53			9087.9		8468
P13984	P13984	T2FB_HUMAN	GTF2F2	General transcription factor IIF subunit 2	7022.14	4908.35	4530.1	5939.57	5465.66	4122.86
P13995	P13995;P13995-2	MTDC_HUMAN	MTHFD2	Bifunctional methylenetetrahydrofolate dehydrogenase/cyclohydrolase, mitochondrial	116908	126156	112974	133435	139751	116213
P14174	P14174	MIF_HUMAN	MIF	Macrophage migration inhibitory factor	24304.1	36782.4	37190.3	25587	30044.6	17586.6
P14314;P14314-2	P14314;P14314-2	GLU2B_HUMAN	PRKCSH	Glucosidase 2 subunit beta	10863.5	11569	12655.5	12868.9	13065.8	12279.8
P14324;P14324-2	P14324;P14324-2	FPPS_HUMAN	FDPS	Farnesyl pyrophosphate synthase	7855.25	7334.8	5417.6	6016.79	7080.28	6701.11
P14373;P14373-2	P14373;P14373-2	TRI27_HUMAN	TRIM27	Zinc finger protein RFP	6740.97	6989.29	5011.96	7231.84	6153.55	4658.85
P14406	P14406	CX7A2_HUMAN	COX7A2	Cytochrome c oxidase subunit 7A2, mitochondrial	10203.7	6499.09	7972.45	6897.73	7632.15	6481.69
P14543;P14543-2	P14543;P14543-2	NID1_HUMAN	NID1	Nidogen-1	7637.21	5588.07	5685.11	5265.05	6199.6	5070.53
P14550	P14550	AK1A1_HUMAN	AKR1A1	Aldo-keto reductase family 1 member A1	3695.41	3781.06	2643.71	2989.17	2519.04	2981.95
P14618	P14618;P14618-2;P14618-3	KPYM_HUMAN	PKM	Pyruvate kinase PKM	156791	200939	157215	183546	164354	162856
P14625	P14625	ENPL_HUMAN	HSP90B1	Endoplasmin	342737	361044	394568	333205	309244	435419
P14635;P14635-2	P14635;P14635-2	CCNB1_HUMAN	CCNB1	G2/mitotic-specific cyclin-B1	49915.6	36490.2	59443.1	43537.6	44749.2	55183.5
P14678;P14678-2	P14678;P14678-2;P63162;P14678-3;P63162-2	RSMB_HUMAN	SNRPB	Small nuclear ribonucleoprotein-associated proteins B and B'	53750.7	49554.6	59637.3	60855.5	47178.3	44534.4
P14735	P14735;P14735-2	IDE_HUMAN	IDE	Insulin-degrading enzyme	33057	38073.7	46242.1	25457.4	22037	21565.5
P14854	P14854	CX6B1_HUMAN	COX6B1	Cytochrome c oxidase subunit 6B1	4950.6	5954.12	3681.37	3723.3	3493.71	3747.94
P14859;P14859-2;P14859-3;P14859-4;P14859-5;P14859-6	P14859;P14859-6;P14859-2;P14859-3;P14859-4;P14859-5	PO2F1_HUMAN	POU2F1	POU domain, class 2, transcription factor 1	4861	3600.29	3954.31	5868.18	5034.56	5600.59
P14866	P14866	HNRPL_HUMAN	HNRNPL	Heterogeneous nuclear ribonucleoprotein L	22174.3	20322.7	23044.2	27189.1	23980	29519
P14868	P14868	SYDC_HUMAN	DARS1	Aspartate--tRNA ligase, cytoplasmic	61654.9	60585.8	63313.2	72933.7	66572.2	81130.7
P14923	P14923	PLAK_HUMAN	JUP	Junction plakoglobin	29854.1	29794.2	35266	28441.9	30720.1	28046.2
P15056	P15056	BRAF_HUMAN	BRAF	Serine/threonine-protein kinase B-raf	8268.73	10579.4	9706.47	7349.04	8511.96	8503.28
P15121	P15121	ALDR_HUMAN	AKR1B1	Aldo-keto reductase family 1 member B1	15469.6	30101.2	15359.7	20599.2	18007.5	15864.2
P15169	P15169	CBPN_HUMAN	CPN1	Carboxypeptidase N catalytic chain	1961.04	1490.72	1796.16	1472.94	1173.58	2762.32
P15170-2;P15170-3	P15170;Q8IYD1;P15170-2;P15170-3	ERF3A_HUMAN	GSPT1	Isoform 2 of Eukaryotic peptide chain release factor GTP-binding subunit ERF3A	44894.6	41880.5	48282.7	41956.1	40041.5	52731.4
P15311	P15311	EZRI_HUMAN	EZR	Ezrin	15819.6	24086.3	20048.4	18661.5	16473.2	17907.9
P15374	P15374	UCHL3_HUMAN	UCHL3	Ubiquitin carboxyl-terminal hydrolase isozyme L3	3971.97	4119.73	4882.35	612353	724611	523758
P15428	P15428;P15428-2;P15428-4;P15428-5	PGDH_HUMAN	HPGD	15-hydroxyprostaglandin dehydrogenase [NAD(+)]	14679.1	11123.6	12706.9	11145.8	13564.4	11237.7
P15531;P15531-2	P15531;P15531-2	NDKA_HUMAN	NME1	Nucleoside diphosphate kinase A	1641.03	1890.14	1526.43	1683.19	2048.17	1168.54
P15559;P15559-2	P15559;P15559-2;P15559-3	NQO1_HUMAN	NQO1	NAD(P)H dehydrogenase [quinone] 1	35065.5	31746	34524	44505.8	45496.1	66424.7
P15735;P15735-2	P15735;P15735-2	PHKG2_HUMAN	PHKG2	Phosphorylase b kinase gamma catalytic chain, liver/testis isoform	12174.5	11950.9	11218.9	8680.42	13487.4	14782.4
P15848;P15848-2	P15848;P15848-2	ARSB_HUMAN	ARSB	Arylsulfatase B			3667.66	4788.71	2964.4	2792.2
P15880	P15880	RS2_HUMAN	RPS2	Small ribosomal subunit protein uS5	25938.1	24919	31938.7	25913.5	28810.7	28737.8
P15882;P15882-3	P15882;P15882-2;P15882-3	CHIN_HUMAN	CHN1	N-chimaerin	2405.98		2236.44		2817.3	2477.73
P15907	P15907	SIAT1_HUMAN	ST6GAL1	Beta-galactoside alpha-2,6-sialyltransferase 1	726.817	1622.02	1392.22	309.26	1962.96	2163.21
P15923	P15923;P15923-3;P15923-2	TFE2_HUMAN	TCF3	Transcription factor E2-alpha	1783.99			1751.18		1401.34
P15924	P15924;P15924-2;P15924-3	DESP_HUMAN	DSP	Desmoplakin	55298.3	50141	60070.4	56340	52947.6	56155.4
P15927;P15927-2;P15927-3	P15927;P15927-2;P15927-3	RFA2_HUMAN	RPA2	Replication protein A 32 kDa subunit	23111.2	21730.4	26404.9	26602.7	25396.8	27813.5
P16035	P16035	TIMP2_HUMAN	TIMP2	Metalloproteinase inhibitor 2	6981.7	5651.48	4614.3		5421.27	5862.6
P16152	P16152	CBR1_HUMAN	CBR1	Carbonyl reductase [NADPH] 1	4015.73	4837.02	4719.32	4730.35	4177.72	5253.99
P16219	P16219	ACADS_HUMAN	ACADS	Short-chain specific acyl-CoA dehydrogenase, mitochondrial	7166.75	7984.37	8211.63	7412.59	4463.47	8789.48
P16278;P16278-3	P16278;P16278-2;P16278-3	BGAL_HUMAN	GLB1	Beta-galactosidase	23862	20704.3	20961.4	24371.8	24834.1	22827.2
P16333	P16333	NCK1_HUMAN	NCK1	Cytoplasmic protein NCK1	5111.98	5061.79	4767.52	4977.22	5081.69	8171.59
P16383	P16383;P16383-2	GCFC2_HUMAN	GCFC2	Intron Large complex component GCFC2	33333.4	31339.3	28026.8	31276.9	34762.1	32049.4
P16403	P16403	H12_HUMAN	H1-2	Histone H1.2		4947.25	5901	5125.38	7342.52	4270.26
P16435	P16435	NCPR_HUMAN	POR	NADPH--cytochrome P450 reductase	12844.9	15034.4	12475.4	13636.5	11971.9	12462.3
P16455	P16455	MGMT_HUMAN	MGMT	Methylated-DNA--protein-cysteine methyltransferase	3237.2	3951.74	3618.7	3509.94	3363.11	5519.32
P16591	P07332;P16591;P07332-2;P07332-3;P07332-4;P16591-2;P16591-3	FER_HUMAN	FER	Tyrosine-protein kinase Fer	6179.94	7280.02	6258.63	7518.58	5858.94	8169.58
P16615	P16615;Q93084;P16615-2;P16615-3;P16615-4;P16615-5;Q93084-1;Q93084-3;Q93084-4;Q93084-5;Q93084-6;Q93084-7	AT2A2_HUMAN	ATP2A2	Sarcoplasmic/endoplasmic reticulum calcium ATPase 2	13376.1	12488.3	12853.8	12821	10236.1	11088.8
P16885	P16885	PLCG2_HUMAN	PLCG2	1-phosphatidylinositol 4,5-bisphosphate phosphodiesterase gamma-2		2352.79		2075.55	3272.76	2139.99
P16989;P16989-2;P16989-3	P16989;P16989-2;P16989-3	YBOX3_HUMAN	YBX3	Y-box-binding protein 3	2759.51	3277.39	2495.21	3127.2	2484.25	2221.88
P17028	P17028	ZNF24_HUMAN	ZNF24	Zinc finger protein 24	4006.18	2850.73	4188	4767.64	3454.13	3765.94
P17066	P17066;P48741	HSP76_HUMAN	HSPA6	Heat shock 70 kDa protein 6	215874	234521	222449	241518	176532	179803
P17152	P17152	TMM11_HUMAN	TMEM11	Transmembrane protein 11, mitochondrial	1946.91	2248.75	2260.67	2918.83	2670.68
P17174;P17174-2	P17174;P17174-2	AATC_HUMAN	GOT1	Aspartate aminotransferase, cytoplasmic						983.145
P17252	P05771;P17252;P05771-2	KPCA_HUMAN	PRKCA	Protein kinase C alpha type	3794.37	4217.88	5087.06	3896.94		4890.15
P17342;P17342-2	P17342;P17342-2	ANPRC_HUMAN	NPR3	Atrial natriuretic peptide receptor 3	1820.51	1774.28	1420.91	2833.15	2026.99	2575.01
P17405;P17405-4	P17405;P17405-4	ASM_HUMAN	SMPD1	Sphingomyelin phosphodiesterase	3005.74	2849.71	2488.16	3940.47	2591.55	3010.66
P17480;P17480-2	P17480;P17480-2	UBF1_HUMAN	UBTF	Nucleolar transcription factor 1	7403.17	6073.56	4903.2	4677.46	6043.31	5822.5
P17612;P17612-2	P17612;P22694;P22694-10;P22694-2;P22694-3;P22694-4;P22694-5;P22694-6;P22694-7;P22694-9;P17612-2	KAPCA_HUMAN	PRKACA	cAMP-dependent protein kinase catalytic subunit alpha	8364.67	10529.8	10027.7	9639.48	8256.73	8208.64
P17655	P17655;P17655-2	CAN2_HUMAN	CAPN2	Calpain-2 catalytic subunit	5767.48	5530.42	6680.43	4965.03	6234.41	5260.15
P17706;P17706-2;P17706-4	P17706;P17706-2;P17706-3;P17706-4	PTN2_HUMAN	PTPN2	Tyrosine-protein phosphatase non-receptor type 2	10078.1	9893.29	9016.75	9208.28	9841.17	7720.6
P17812	P17812;Q9NRF8	PYRG1_HUMAN	CTPS1	CTP synthase 1	45141	47032.9	46272	49223	41447.2	45130.2
P17844;P17844-2	P17844;P17844-2	DDX5_HUMAN	DDX5	Probable ATP-dependent RNA helicase DDX5	283437	272407	291026	319996	331060	356539
P17858-2	P08237;P17858;P08237-3;P17858-2	PFKAL_HUMAN	PFKL	Isoform 2 of ATP-dependent 6-phosphofructokinase, liver type	60025.4	62552.4	64119.3	61209.3	57229.9	58018.2
P17900	P17900	SAP3_HUMAN	GM2A	Ganglioside GM2 activator	4541.74	4061.78	5804.66	4260.7	6091.01	4663.41
P17980	P17980	PRS6A_HUMAN	PSMC3	26S proteasome regulatory subunit 6A	146746	127023	135650	159742	144986	161930
P17987	P17987	TCPA_HUMAN	TCP1	T-complex protein 1 subunit alpha	133272	151159	144908	138237	133454	126585
P18031	P18031	PTN1_HUMAN	PTPN1	Tyrosine-protein phosphatase non-receptor type 1	71465.7	75435.9	73824.6	76893.8	82348.7	72623.9
P18065	P18065	IBP2_HUMAN	IGFBP2	Insulin-like growth factor-binding protein 2	2183.76	1133.63	1176.86	1335.44	1750.94	1714.26
P18074	P18074;P18074-2	ERCC2_HUMAN	ERCC2	General transcription and DNA repair factor IIH helicase subunit XPD	8465.63	7830.72	7659	8058.07	7164.54	8025.45
P18077	P18077	RL35A_HUMAN	RPL35A	Large ribosomal subunit protein eL33	1072870	1247720	1121920	994147	962198	1021650
P18085	P18085	ARF4_HUMAN	ARF4	ADP-ribosylation factor 4	236274	245821	247279	245497	241315	203370
P18124	P18124	RL7_HUMAN	RPL7	Large ribosomal subunit protein uL30	194281	195570	216216	169309	155661	203383
P18206;P18206-2	P18206;P18206-2;P18206-3	VINC_HUMAN	VCL	Vinculin	15386.7	16841.6	16990.9	16498.7	14419.2	16833
P18433;P18433-6	P18433;P18433-6	PTPRA_HUMAN	PTPRA	Receptor-type tyrosine-protein phosphatase alpha	10564.6	9712.47	10224.5	12746.2	11273.5	11237.4
P18440	P18440	ARY1_HUMAN	NAT1	Arylamine N-acetyltransferase 1	1919.28	1223.66	2431.29	1669.34	1413.37	535.772
P18583;P18583-10;P18583-2;P18583-3;P18583-4;P18583-5;P18583-6;P18583-7;P18583-9	P18583;P18583-10;P18583-2;P18583-3;P18583-4;P18583-5;P18583-6;P18583-7;P18583-8;P18583-9	SON_HUMAN	SON	Protein SON	34238.8	35817.2	30277.3	31562.2	35555.1	24490.6
P18615;P18615-3	P18615;P18615-3;P18615-4	NELFE_HUMAN	NELFE	Negative elongation factor E	3499.22	2392.65	2475.3	3049.67	3123.64	3683.77
P18621;P18621-3	P18621;P18621-3	RL17_HUMAN	RPL17	Large ribosomal subunit protein uL22	193788	183491	163238	171512	144616	158041
P18669	P18669	PGAM1_HUMAN	PGAM1	Phosphoglycerate mutase 1	272192	309161	253031	306180	320013	266976
P18754;P18754-2	P18754;P18754-2	RCC1_HUMAN	RCC1	Regulator of chromosome condensation	98014.3	95682.2	101045	98240.4	103688	90199.3
P18827	P18827	SDC1_HUMAN	SDC1	Syndecan-1	3871.61	3357.42	2985.58		2742.08
P18858	P18858;P18858-2;P18858-3	DNLI1_HUMAN	LIG1	DNA ligase 1	185284	174076	187964	188637	194656	189134
P18887	P18887	XRCC1_HUMAN	XRCC1	DNA repair protein XRCC1	4658.61	3790.48	6888.67	6771.31	7224.31	7431.36
P19013	P19013	K2C4_HUMAN	KRT4	Keratin, type II cytoskeletal 4
P19174;P19174-2	P19174;P19174-2	PLCG1_HUMAN	PLCG1	1-phosphatidylinositol 4,5-bisphosphate phosphodiesterase gamma-1	5410.28	4472.6	4903.27	4439.15	5437.64	5959.4
P19338	P19338	NUCL_HUMAN	NCL	Nucleolin	92034.5	151026	82036.6	78137.2	85755	97269.1
P19367;P19367-2;P19367-3;P19367-4	P19367;P19367-2;P19367-3;P19367-4	HXK1_HUMAN	HK1	Hexokinase-1	6715.98	8533.27	5567	7427.88	6066.97	5012.35
P19387	P19387	RPB3_HUMAN	POLR2C	DNA-directed RNA polymerase II subunit RPB3	22721.3	24395.8	22082.8	22635.5	24670	22646
P19388	P19388	RPAB1_HUMAN	POLR2E	DNA-directed RNA polymerases I, II, and III subunit RPABC1	42135.6	40775.2	36363	41763	41358.3	37922.7
P19404	P19404	NDUV2_HUMAN	NDUFV2	NADH dehydrogenase [ubiquinone] flavoprotein 2, mitochondrial	4546.79	5282.41	5595.06	5685.18	3920.13	4421.84
P19419	P19419	ELK1_HUMAN	ELK1	ETS domain-containing protein Elk-1	2345.09	1787.06	968.478	1730.58	1438.88	2611.05
P19447	P19447	ERCC3_HUMAN	ERCC3	General transcription and DNA repair factor IIH helicase subunit XPB	8373.39	9745.62	9472.39	8330.53	9092.13	8206.31
P19474	P19474;P19474-2	RO52_HUMAN	TRIM21	E3 ubiquitin-protein ligase TRIM21	5869.91	7441.01	7162.32	6678.35	7116.62	6681.16
P19484;P19484-2	P19484;P19484-2	TFEB_HUMAN	TFEB	Transcription factor EB				849.849	759.916
P19525	P19525;P19525-2	E2AK2_HUMAN	EIF2AK2	Interferon-induced, double-stranded RNA-activated protein kinase	105641	104364	109346	102789	104085	114907
P19532	P19532	TFE3_HUMAN	TFE3	Transcription factor E3	1759.61			1197.75	941.229	1249.05
P19623	P19623	SPEE_HUMAN	SRM	Spermidine synthase	55223.5	61672.6	61910.7	52175.2	54005.9	56012.7
P19784	P19784	CSK22_HUMAN	CSNK2A2	Casein kinase II subunit alpha'	816.66	713.422		357.679	688.398	1043.45
P19793;P19793-2	P19793;P19793-2	RXRA_HUMAN	RXRA	Retinoic acid receptor RXR-alpha	9626.45	11447.9	11073.9	9951.91	12969.8	7747.62
P19823	P19823	ITIH2_HUMAN	ITIH2	Inter-alpha-trypsin inhibitor heavy chain H2	441364	350275	385790	382756	396010	423233
P19827	P19827;P19827-2;P19827-3	ITIH1_HUMAN	ITIH1	Inter-alpha-trypsin inhibitor heavy chain H1	31507.7	20361.5	24446.8	21105.9	21014.3	30083
P19838;P19838-2	P19838;P19838-2	NFKB1_HUMAN	NFKB1	Nuclear factor NF-kappa-B p105 subunit	37318	34355.5	35592.2	35187.6	33810.5	34070.4
P20020;P20020-1;P20020-2;P20020-4;P20020-5;P20020-6	P20020;P23634;P23634-2;P23634-3;P23634-4;P23634-5;P23634-6;P23634-7;P23634-8;P20020-1;P20020-2;P20020-4;P20020-5;P20020-6	AT2B1_HUMAN	ATP2B1	Plasma membrane calcium-transporting ATPase 1	547.381				1104.85
P20042	P20042	IF2B_HUMAN	EIF2S2	Eukaryotic translation initiation factor 2 subunit 2	44744.3	42826.2	49662.4	53964.6	55131.8	62257.1
P20073;P20073-2	P20073;P20073-2	ANXA7_HUMAN	ANXA7	Annexin A7	5916.75	5464.52	7274.33	4773.11	6558.18	7232.33
P20226;P20226-2	P20226;P20226-2	TBP_HUMAN	TBP	TATA-box-binding protein	5314.54	4003.81	5236.33	4762.2	5128.72	5379.44
P20248	P20248	CCNA2_HUMAN	CCNA2	Cyclin-A2	1687.27	1236.92	840.812	1429.6	1783.93	1323.05
P20290-2	P20290;P20290-2	BTF3_HUMAN	BTF3	Isoform 2 of Transcription factor BTF3	11009	8101.11	7913.97	9612.47	11556.9	11009.9
P20336	P20336	RAB3A_HUMAN	RAB3A	Ras-related protein Rab-3A	19064	15030.6	13474	15883.3	16588.1	16603.1
P20337	P20337	RAB3B_HUMAN	RAB3B	Ras-related protein Rab-3B	29260.5	26685.4	25792.4	26936.7	25153.5	21716.6
P20338	P20338	RAB4A_HUMAN	RAB4A	Ras-related protein Rab-4A	9361.32	4435.13	3688.84	4733.9	7888.05	6229.21
P20339;P20339-2	P20339;P20339-2	RAB5A_HUMAN	RAB5A	Ras-related protein Rab-5A	25536.3	21299.4	19993.8	23296.6	26656.5	24528.1
P20340;P20340-2	P20340;P20340-2;P20340-3;P20340-4	RAB6A_HUMAN	RAB6A	Ras-related protein Rab-6A	161407	165331	147624	163982	163210	154259
P20585	P20585	MSH3_HUMAN	MSH3	DNA mismatch repair protein Msh3	10387.2	10923.7	11378.9	12215.7	10546.5	13047.3
P20618	P20618	PSB1_HUMAN	PSMB1	Proteasome subunit beta type-1	34044.2	32980.8	32434.3	37667.6	39070.5	34788.5
P20700	P20700	LMNB1_HUMAN	LMNB1	Lamin-B1	35444.2	30161.9	33575.2	37585.4	33551.3	36078
P20742	P20742;P20742-2	PZP_HUMAN	PZP	Pregcy zone protein	4032.69	3496.91	4482.83	3543.43	2360.87	2182.51
P20774	P20774	MIME_HUMAN	OGN	Mimecan	3802.87	4206.24	3832.78	2325.33	3924.84	4114.08
P20839;P20839-3;P20839-5;P20839-6;P20839-7	P20839;P20839-3;P20839-2;P20839-4;P20839-5;P20839-6;P20839-7	IMDH1_HUMAN	IMPDH1	Inosine-5'-monophosphate dehydrogenase 1	12740.7	9332.08	11924.2	10314	12285.9	11495.8
P20908;P20908-2	P20908;P20908-2	CO5A1_HUMAN	COL5A1	Collagen alpha-1(V) chain		2001.5	2408.84	2267.1	1281.21	5563.86
P20929-2;P20929-3	P20929;P20929-4;P20929-2;P20929-3	NEBU_HUMAN	NEB	Isoform 2 of Nebulin	3694.87		3560.98		5395.97	2590.78
P20936-4	P20936;P20936-2;P20936-4	RASA1_HUMAN	RASA1	Isoform 4 of Ras GTPase-activating protein 1	6383.65	7023.88	6643.48	7210.05	5097.05	7392.56
P21127;P21127-10;P21127-12;P21127-2;P21127-3;P21127-4;P21127-5;P21127-6;P21127-8;P21127-9	P21127;Q9UQ88;P21127-10;P21127-12;P21127-2;P21127-3;P21127-4;P21127-5;P21127-6;P21127-8;P21127-9;Q9UQ88-10;Q9UQ88-2;Q9UQ88-3;Q9UQ88-4;Q9UQ88-5;Q9UQ88-9	CD11B_HUMAN	CDK11B	Cyclin-dependent kinase 11B	38261.9	39747.6	40399	38326.8	35062.6	39728
P21266	P21266	GSTM3_HUMAN	GSTM3	Glutathione S-transferase Mu 3	7817.68	10104.3	8986.99	8497.71	10096.7	7879.39
P21281	P21281	VATB2_HUMAN	ATP6V1B2	V-type proton ATPase subunit B, brain isoform	74964.1	67583.9	70840.6	69227.6	65772.1	73053.6
P21283	P21283	VATC1_HUMAN	ATP6V1C1	V-type proton ATPase subunit C 1	1372.78	2609.28	3063.51	3405.41
P21333;P21333-2	P21333;P21333-2	FLNA_HUMAN	FLNA	Filamin-A	29003.7	28737	27617.9	27985.5	25215.5	28374.5
P21359;P21359-2;P21359-6	P21359;P21359-2;P21359-3;P21359-4;P21359-5;P21359-6	NF1_HUMAN	NF1	Neurofibromin	8963.46	9386.65	9026.3	9042.68	8086.8	9383.35
P21399	P21399	ACOHC_HUMAN	ACO1	Cytoplasmic aconitate hydratase	17703.5	21970.6	20439.6	22437.1	18628.3	19450.2
P21741;P21741-2	P21741;P21741-2	MK_HUMAN	MDK	Midkine	2697.67	2614.14	2301.54	3677.74	4146.78	3046.55
P21796	P21796	VDAC1_HUMAN	VDAC1	Voltage-dependent anion-selective channel protein 1	73206.6	84118.1	61193.5	76156.4	69319.7	62610.8
P21912	P21912	SDHB_HUMAN	SDHB	Succinate dehydrogenase [ubiquinone] iron-sulfur subunit, mitochondrial	32089.4	25251.7	26920	26819.6	26914.2	26031.2
P21953	P21953	ODBB_HUMAN	BCKDHB	2-oxoisovalerate dehydrogenase subunit beta, mitochondrial	12188.4	14054.5	14426.1	15276.5	15420.2	15989.6
P22033	P22033	MUTA_HUMAN	MMUT	Methylmalonyl-CoA mutase, mitochondrial	10363.6	6759.33	10258.7	9286.07	7468.96	8289.13
P22059	P22059	OSBP1_HUMAN	OSBP	Oxysterol-binding protein 1	11302.8	10108.9	11079.4	11371.1	9635.65	11692.6
P22061;P22061-2	P22061;P22061-2	PIMT_HUMAN	PCMT1	Protein-L-isoaspartate(D-aspartate) O-methyltransferase	3202.46	4182.3	4749.9	3438.41	2799	4998.66
P22087	P22087	FBRL_HUMAN	FBL	rRNA 2'-O-methyltransferase fibrillarin	32168.4	36642.2	35496.9	40125.7	39523.4	39387.2
P22102	P22102	PUR2_HUMAN	GART	Trifunctional purine biosynthetic protein adenosine-3	105383	110565	111609	115759	115859	111279
P22234	P22234;P22234-2	PUR6_HUMAN	PAICS	Bifunctional phosphoribosylaminoimidazole carboxylase/phosphoribosylaminoimidazole succinocarboxamide synthetase	36198.4	43147.4	42027	41524.1	37074.8	40488.3
P22307;P22307-4;P22307-7;P22307-8	P22307;P22307-2;P22307-4;P22307-6;P22307-7;P22307-8	SCP2_HUMAN	SCP2	Sterol carrier protein 2	5658.2	5883.51		4467.04	4203.58	4487.22
P22314;P22314-2	P22314;P22314-2	UBA1_HUMAN	UBA1	Ubiquitin-like modifier-activating enzyme 1	44665.2	50840.8	47709.8	42520.7	40661.3	44804.2
P22392;P22392-2	P22392;O60361;P22392-2	NDKB_HUMAN	NME2	Nucleoside diphosphate kinase B	31156.6	31338.4	26304.7	31267.8	27097	26293.5
P22415;P22415-2	P22415;Q15853;P22415-2;Q15853-2;Q15853-3;Q15853-4	USF1_HUMAN	USF1	Upstream stimulatory factor 1		3160.7	2150.35	3065.25	3201.34	1986.37
P22570-4	P22570-4	ADRO_HUMAN	FDXR	Isoform 4 of NADPH:adrenodoxin oxidoreductase, mitochondrial	348.455		341.23
P22570;P22570-2;P22570-7	P22570;P22570-2;P22570-3;P22570-4;P22570-5;P22570-6;P22570-7	ADRO_HUMAN	FDXR	NADPH:adrenodoxin oxidoreductase, mitochondrial	181141	165824	180458	200672	202038	197200
P22607-2	P11362;P11362-14;P11362-19;P11362-2;P11362-20;P11362-21;P11362-3;P11362-4;P11362-5;P11362-6;P11362-7;P21802;P21802-3;P22455;P22607;P21802-15;P21802-16;P21802-17;P21802-18;P21802-2;P21802-20;P21802-21;P21802-22;P21802-23;P21802-4;P21802-5;P21802-6;P21802-8;P22455-2;P22607-2;P22607-3	FGFR3_HUMAN	FGFR3	Isoform 2 of Fibroblast growth factor receptor 3	3385.08	3449.64	2057.86	3355.85	2064.3	2195.67
P22626	P22626	ROA2_HUMAN	HNRNPA2B1	Heterogeneous nuclear ribonucleoproteins A2/B1	52633.6	52262.5	49276.3	55272.4	50001.1	57781.6
P22670	P22670;P48378;P48380;P48378-2;P48380-2	RFX1_HUMAN	RFX1	MHC class II regulatory factor RFX1	8264.84	4598.92	5550.89	5624.54	4820.01	5646.97
P22694;P22694-2;P22694-3;P22694-4;P22694-5;P22694-6;P22694-7;P22694-9	P22694;P22694-2;P22694-3;P22694-4;P22694-5;P22694-6;P22694-7;P22694-8;P22694-9	KAPCB_HUMAN	PRKACB	cAMP-dependent protein kinase catalytic subunit beta	7764.48	8475.6	8685.46	8419.58	6571.33	8333.31
P22695	P22695	QCR2_HUMAN	UQCRC2	Cytochrome b-c1 complex subunit 2, mitochondrial	8937.86	12085	11100.7	9194.96	8008.51	9294.11
P22735	P22735	TGM1_HUMAN	TGM1	Protein-glutamine gamma-glutamyltransferase K		2286.38	2685.15
P22830;P22830-2	P22830;P22830-2	HEMH_HUMAN	FECH	Ferrochelatase, mitochondrial	18111	17415.3	16064.8	19671.1	15929.2	17723.6
P23109-2	P23109-2	AMPD1_HUMAN	AMPD1	Isoform 2 of AMP deaminase 1			2419.43	2667.93	4448.14
P23142	P23142	FBLN1_HUMAN	FBLN1	Fibulin-1	125925	131788	134546	127720	128764	127824
P23142-4	P23142-4	FBLN1_HUMAN	FBLN1	Isoform C of Fibulin-1	7599.88	9301.73	11362.5	9342.67	7412.27	8944.65
P23193	P23193;Q15560;P23193-2;Q15560-2	TCEA1_HUMAN	TCEA1	Transcription elongation factor A protein 1	6894.42	4759.27	7922.38	3408.42	6798.97	7135.25
P23246	P23246;P23246-2	SFPQ_HUMAN	SFPQ	Splicing factor, proline- and glutamine-rich	20651.8	19903.4	20170.3	19887.5	20600.4	23177
P23258	P23258;Q9NRH3	TBG1_HUMAN	TUBG1	Tubulin gamma-1 chain	18662.7	16210.8	17080.2	18963.9	18186	18332.8
P23284	P23284	PPIB_HUMAN	PPIB	Peptidyl-prolyl cis-trans isomerase B	143170	147216	129733	125043	135048	146934
P23368	P23368;P23368-2	MAOM_HUMAN	ME2	NAD-dependent malic enzyme, mitochondrial	29231.1	28500.3	30134.7	29848.5	31193.5	30046.4
P23381	P23381;P23381-2	SYWC_HUMAN	WARS1	Tryptophan--tRNA ligase, cytoplasmic	32874.9	44615.7	38762.7	38728.2	27024.8	41047.8
P23396	P23396;P23396-2	RS3_HUMAN	RPS3	Small ribosomal subunit protein uS3	425446	523537	510605	443540	359290	386681
P23443;P23443-2;P23443-3;P23443-5	P23443;P23443-4;P23443-2;P23443-3;P23443-5	KS6B1_HUMAN	RPS6KB1	Ribosomal protein S6 kinase beta-1	36377.1	33773.7	37701.6	36042.3	37856.6	42524.4
P23458	P23458	JAK1_HUMAN	JAK1	Tyrosine-protein kinase JAK1	5425.5	6321	6078.18	6197.76	5683.93	5745.59
P23526	P23526;P23526-2	SAHH_HUMAN	AHCY	Adenosylhomocysteinase	26958	29981.8	24749.7	27264.8	26004.3	26406.5
P23528	P23528;Q9Y281;Q9Y281-3	COF1_HUMAN	CFL1	Cofilin-1	17344.1	23328	18927.8	15828	14498.2	13529
P23610	P23610	HAP40_HUMAN	F8A1	40-kDa huntingtin-associated protein	4119.36	3832.31	4106.36	3616.88	4509.74	4666.55
P23677	P23677	IP3KA_HUMAN	ITPKA	Inositol-trisphosphate 3-kinase A	6648.06	8610.51	8623.53	8704.77	9329.89	7579.38
P23743	P23743	DGKA_HUMAN	DGKA	Diacylglycerol kinase alpha	6671.79	6601.4	6109.87	9831.13	8756.26	7379.43
P23786	P23786	CPT2_HUMAN	CPT2	Carnitine O-palmitoyltransferase 2, mitochondrial	10892.2	9572.98	9207.63	8876.33	9136.83	8783.61
P23919	P23919;P23919-2	KTHY_HUMAN	DTYMK	Thymidylate kinase	260209	255699	235037	258469	283196	211778
P23921	P23921	RIR1_HUMAN	RRM1	Ribonucleoside-diphosphate reductase large subunit	109598	105217	137304	112541	101242	119805
P24385	P24385	CCND1_HUMAN	CCND1	G1/S-specific cyclin-D1	3851.37	7542.99	4273.29	4731.84	4919.95	3369.97
P24534	P24534	EF1B_HUMAN	EEF1B2	Elongation factor 1-beta	11270.3	10664.7	10421.1	9945.85	7206.14	6626.6
P24539	P24539	AT5F1_HUMAN	ATP5PB	ATP synthase F(0) complex subunit B1, mitochondrial	1972.23	2039.99	3373.53	2067.62	619.871	1940.83
P24666	P24666;P24666-4	PPAC_HUMAN	ACP1	Low molecular weight phosphotyrosine protein phosphatase	3428.32	2680.2	6617.75	4229.98	2907.59	4000.12
P24752	P24752;P24752-2	THIL_HUMAN	ACAT1	Acetyl-CoA acetyltransferase, mitochondrial	23150.7	22151.3	24330.6	27133.4	26100.2	31272.2
P24928	P24928	RPB1_HUMAN	POLR2A	DNA-directed RNA polymerase II subunit RPB1	12219.4	12392.5	11909.6	11034.7	11351.8	11742
P24941	P24941;Q00526	CDK2_HUMAN	CDK2	Cyclin-dependent kinase 2	44257.8	51368.3	49061.3	42945.8	41367.3	45091.7
P25054	P25054;P25054-2;P25054-3	APC_HUMAN	APC	Adenomatous polyposis coli protein	4253.03	4038.17	4106.76	4365.73	5073.11	4332.4
P25098	P25098;P35626	ARBK1_HUMAN	GRK2	Beta-adrenergic receptor kinase 1	8968.3	7055.49	9860.02	9085.84	9718.89	8304.5
P25205;P25205-2	P25205;P25205-2	MCM3_HUMAN	MCM3	DNA replication licensing factor MCM3	71299.4	67785.9	75470.7	69449.3	67968.8	80056.7
P25208	P25208	NFYB_HUMAN	NFYB	Nuclear transcription factor Y subunit beta	19718.9	16914.6	20186.5	21642.1	18984.8	19018.6
P25311	P25311	ZA2G_HUMAN	AZGP1	Zinc-alpha-2-glycoprotein	3586.14	4808.26	11137.4	8344.26
P25325;P25325-2	P25325;P25325-2	THTM_HUMAN	MPST	3-mercaptopyruvate sulfurtransferase	14717.4	12574.8	13135	11495.5	14537.2	13313.7
P25398	P25398	RS12_HUMAN	RPS12	Small ribosomal subunit protein eS12	61429.1	61604.1	88790.5	52229.3	58586.6	67512.2
P25490	P25490	TYY1_HUMAN	YY1	Transcriptional repressor protein YY1	4974.96	4461.06	4764.54	5112.9	3570	4653.26
P25685	P25685;P25685-2	DNJB1_HUMAN	DNAJB1	DnaJ homolog subfamily B member 1	9526.86	9051.84	11669.4	8340.88	10020.5	7929.65
P25705	P25705;P25705-2	ATPA_HUMAN	ATP5F1A	ATP synthase subunit alpha, mitochondrial	396221	393031	389559	361412	368666	392512
P25786;P25786-2	P25786;P25786-2	PSA1_HUMAN	PSMA1	Proteasome subunit alpha type-1	26290.4	23143.7	28558	26159	28956.8	27451.7
P25787	P25787	PSA2_HUMAN	PSMA2	Proteasome subunit alpha type-2	26360.4	25649.5	21724.4	23373.8	25133.7	22639.2
P25788;P25788-2	P25788;P25788-2	PSA3_HUMAN	PSMA3	Proteasome subunit alpha type-3	8841.42	6819.62	8874.71	9123.73	7453.22	7305.75
P25789	P25789;P25789-2	PSA4_HUMAN	PSMA4	Proteasome subunit alpha type-4	99143.4	111849	104307	94917.9	104267	104357
P26038	P26038	MOES_HUMAN	MSN	Moesin	87583.8	108127	81537.4	96930.4	84824.9	81991.3
P26196	P26196	DDX6_HUMAN	DDX6	Probable ATP-dependent RNA helicase DDX6	282669	286187	305935	294334	282548	295190
P26232-3	P26232;P26232-2;P26232-3;P26232-5	CTNA2_HUMAN	CTNNA2	Isoform 3 of Catenin alpha-2	19859.7	14424.5	22388.9	20182.8	17554.7	24464.8
P26358;P26358-2	P26358;P26358-2	DNMT1_HUMAN	DNMT1	DNA (cytosine-5)-methyltransferase 1	10519.7	11990.1	10896.9	10948.4	12684.7	11382.9
P26368;P26368-2	P26368;P26368-2	U2AF2_HUMAN	U2AF2	Splicing factor U2AF 65 kDa subunit	6464.21	8396.28	8077.69	8366.87	6044.37	7677.73
P26373	P26373;P26373-2	RL13_HUMAN	RPL13	Large ribosomal subunit protein eL13	150935	147374	147072	114228	132416	131490
P26440	P26440;P26440-2	IVD_HUMAN	IVD	Isovaleryl-CoA dehydrogenase, mitochondrial	30612.2	26479.9	25824.2	27781.5	31430	29361.4
P26599;P26599-1;P26599-2	P26599;P26599-1;P26599-2	PTBP1_HUMAN	PTBP1	Polypyrimidine tract-binding protein 1	251141	219145	268489	268449	253454	303775
P26639;P26639-2	A2RTX5;P26639;A2RTX5-2;P26639-2	SYTC_HUMAN	TARS1	Threonine--tRNA ligase 1, cytoplasmic	68779.3	72493	68078.7	70480.2	71755.3	70704
P26640	P26640	SYVC_HUMAN	VARS1	Valine--tRNA ligase	117963	136973	131890	130479	124843	137089
P26641	P26641;P26641-2	EF1G_HUMAN	EEF1G	Elongation factor 1-gamma	82552.1	103902	89386	84759.2	77531.6	89656.4
P26885	P26885	FKBP2_HUMAN	FKBP2	Peptidyl-prolyl cis-trans isomerase FKBP2	6728.37	8400.77	7310.5	6323.85	6207.51	9066.78
P26927	P26927	HGFL_HUMAN	MST1	Hepatocyte growth factor-like protein	10743.2	8932.4	14143.4	8553.53	18355.6	5500.13
P27105	P27105;P27105-2	STOM_HUMAN	STOM	Stomatin	10060.5	9102.36	8830.84	9879.35	7697.23	8861.68
P27144	P27144	KAD4_HUMAN	AK4	Adenylate kinase 4, mitochondrial	24385.5	24635.7	21856.2	20216.3	20166.5	25086
P27348	P27348	1433T_HUMAN	YWHAQ	14-3-3 protein theta	106891	127833	128362	115800	101365	106819
P27361;P27361-2;P27361-3	P27361;P27361-2;P27361-3	MK03_HUMAN	MAPK3	Mitogen-activated protein kinase 3	2678.68	1948.1	2530.12	2507.96	2883.24	3328.51
P27448-8	P27448;P27448-2;P27448-3;P27448-4;P27448-6;P27448-7;P27448-8	MARK3_HUMAN	MARK3	Isoform 7 of MAP/microtubule affinity-regulating kinase 3	32272.3	37533.8	33248.6	36642.2	31596.7	33544.9
P27540;P27540-2;P27540-3;P27540-4	P27540;P27540-2;P27540-3;P27540-4	ARNT_HUMAN	ARNT	Aryl hydrocarbon receptor nuclear translocator	1530.25	879.683	1373.35	1055.58	812.706	861.364
P27635	P27635	RL10_HUMAN	RPL10	Large ribosomal subunit protein uL16	174304	149659	158416	168167	133381	176641
P27694	P27694	RFA1_HUMAN	RPA1	Replication protein A 70 kDa DNA-binding subunit	30533	28023.9	28809.8	27204.2	27036.4	27021.1
P27695	P27695	APEX1_HUMAN	APEX1	DNA-(apurinic or apyrimidinic site) endonuclease	9161.27	8337.44	10122	8470.82	8942.65	10099.7
P27708	P27708	PYR1_HUMAN	CAD	CAD protein	220241	240074	247822	234826	213090	225587
P27797	P27797	CALR_HUMAN	CALR	Calreticulin	2505.77	3386.63	2853.94	2875.94	2624.61	2772.57
P27816;P27816-6	P27816;P27816-2;P27816-6	MAP4_HUMAN	MAP4	Microtubule-associated protein 4	11734.6	10669.8	10069.3	11024.4	8556.68	10205.8
P27824;P27824-2	P27824;P27824-2	CALX_HUMAN	CANX	Calnexin	43706.2	38422.7	38353.6	35226.9	35723.9	39666.8
P27986;P27986-4	P27986;P27986-4	P85A_HUMAN	PIK3R1	Phosphatidylinositol 3-kinase regulatory subunit alpha	1150.99	1169.2	1513.4	1296.23	1248.69	857.828
P27987	P27987;P27987-2	IP3KB_HUMAN	ITPKB	Inositol-trisphosphate 3-kinase B			1706.24		2023.76	2047.07
P28066	P28066;P28066-2	PSA5_HUMAN	PSMA5	Proteasome subunit alpha type-5	27819.6	30350.1	34511.3	26265.9	27938	29913.3
P28070	P28070	PSB4_HUMAN	PSMB4	Proteasome subunit beta type-4	18611.4	22171.6	21584.3	19100.3	17940.4	14808.7
P28072	P28072	PSB6_HUMAN	PSMB6	Proteasome subunit beta type-6	27077.8	24483.6	27488.7	23097.1	22118.1	21267.8
P28074	P28074;P28074-3	PSB5_HUMAN	PSMB5	Proteasome subunit beta type-5	15258.6	13134.2	13312.9	15090.3	13724.8	13095.5
P28161;P28161-2	P09488;P28161;Q03013;P09488-2;P28161-2;Q03013-2;Q03013-3	GSTM2_HUMAN	GSTM2	Glutathione S-transferase Mu 2	1324.57	1418.81	2079.99	1441.98	1741.54
P28288	P28288;P28288-2	ABCD3_HUMAN	ABCD3	ATP-binding cassette sub-family D member 3	12813.1	10738	9953.79	9966.33	11340.6	15064.6
P28290;P28290-2;P28290-3	P28290;P28290-2;P28290-3	ITPI2_HUMAN	ITPRID2	Protein ITPRID2	1823.46	3165.08	3075.92	4167.21	3383.65	3228.4
P28331;P28331-2;P28331-4	P28331;P28331-2;P28331-4	NDUS1_HUMAN	NDUFS1	NADH-ubiquinone oxidoreductase 75 kDa subunit, mitochondrial	59781.5	54810.2	52087	55763.9	61203.1	57058.2
P28340	P28340	DPOD1_HUMAN	POLD1	DNA polymerase delta catalytic subunit	85826.9	91816.6	93767.7	92456.8	94065.8	93726
P28347;P28347-2	P28347;Q15561;Q99594;P28347-2;Q15561-2;Q15561-3	TEAD1_HUMAN	TEAD1	Transcriptional enhancer factor TEF-1	1128.46	634.221	1200.57	1471.46	876.273	837.831
P28370;P28370-2	P28370;P28370-2	SMCA1_HUMAN	SMARCA1	Probable global transcription activator SNF2L1	12909.2	13425.7	12357.4	14904.6	13719.2	15478.2
P28482	P27361;P28482;P31152;Q16659;P27361-2;P27361-3;P28482-2	MK01_HUMAN	MAPK1	Mitogen-activated protein kinase 1	15726.4	14055.7	15528.3	18374.8	15123.4	15031.6
P28702;P28702-3	P28702;P28702-3	RXRB_HUMAN	RXRB	Retinoic acid receptor RXR-beta	15589.5	13275.9	12998.4	14487.4	14048.1	14686.3
P28715	P28715	ERCC5_HUMAN	ERCC5	DNA excision repair protein ERCC-5	7811.25	5441.41	7213.22	8047.01	6573.24	8791.75
P28749	P28749;P28749-2	RBL1_HUMAN	RBL1	Retinoblastoma-like protein 1	3045.75	2744.73	2153.1	2285.05	1883.35	2113.08
P28799;P28799-2	P28799;P28799-2;P28799-3	GRN_HUMAN	GRN	Progranulin	4942.06			1722.77	4690.53	3274.83
P28838;P28838-2	P28838;P28838-2	AMPL_HUMAN	LAP3	Cytosol aminopeptidase	50267.4	57539.7	58089.8	57101.9	61991.6	67140.9
P29083	P29083	T2EA_HUMAN	GTF2E1	General transcription factor IIE subunit 1	31236.2	27756.1	29772.9	32027.3	33111.4	38122.9
P29084	P29084	T2EB_HUMAN	GTF2E2	Transcription initiation factor IIE subunit beta	3458.75	3217.92	4372.67	3100.31	4350.62	3647.66
P29122;P29122-2;P29122-4;P29122-5;P29122-7;P29122-8	P29122;P29122-2;P29122-4;P29122-5;P29122-6;P29122-7;P29122-8	PCSK6_HUMAN	PCSK6	Proprotein convertase subtilisin/kexin type 6		1693.23	1518.55		2008.61
P29144	P29144	TPP2_HUMAN	TPP2	Tripeptidyl-peptidase 2	11663.6	15191.9	13701.9	14054.1	11636.4	12597.6
P29317	P29317;P29323;P54753;P54760;P54762;P54764;Q15375;Q9UF33;P29323-3;P29323-2;P54762-5;P54764-2;Q15375-2;Q15375-4;Q9UF33-2;Q9UF33-3	EPHA2_HUMAN	EPHA2	Ephrin type-A receptor 2		8951.6	7543.29	7673.96	3161.01	10192.9
P29353-3	P29353-3	SHC1_HUMAN	SHC1	Isoform p46Shc of SHC-transforming protein 1	7208.26	4796.83	6135.74	7582.92	5449.63	9886.78
P29353;P29353-2;P29353-6;P29353-7	P29353;Q6S5L8;P29353-2;P29353-7;P29353-3;P29353-6	SHC1_HUMAN	SHC1	SHC-transforming protein 1	21686.5	21068.9	20624.3	19116	21751.6	22494.8
P29372;P29372-2;P29372-4;P29372-5	P29372;P29372-4;P29372-2;P29372-5	3MG_HUMAN	MPG	DNA-3-methyladenine glycosylase	28577.8	26701.3	31250.4	38103.4	36168.4	40803.8
P29375;P29375-2	P29375;P29375-2	KDM5A_HUMAN	KDM5A	Lysine-specific demethylase 5A	513.02	1055.78	1586.89	2946.03	1527.96	1760.07
P29401;P29401-2	P29401;P29401-2	TKT_HUMAN	TKT	Transketolase	28480.2	27221.5	25892.4	26318	27115.5	28525.5
P29508	P29508;P29508-2	SPB3_HUMAN	SERPINB3	Serpin B3	4595.65	4972.56	9702.87	4568.47	3188.46	3547.13
P29590-11	P29590;P29590-11	PML_HUMAN	PML	Isoform PML-11 of Protein PML	4055.61	4272.16	4950.64	3847.01	4583.7	3631.48
P29590-13	P29590-13;P29590-3;P29590-8	PML_HUMAN	PML	Isoform PML-13 of Protein PML	7159.75	5608.16	7286.51	7362.59	6111	6754.49
P29590-2	P29590;P29590-10;P29590-11;P29590-12;P29590-13;P29590-14;P29590-2;P29590-3;P29590-4;P29590-5;P29590-8;P29590-9	PML_HUMAN	PML	Isoform PML-5 of Protein PML	25641.8	24384.9	22606.9	26478.3	28185.1	26277.2
P29597	P29597	TYK2_HUMAN	TYK2	Non-receptor tyrosine-protein kinase TYK2	4714.82	3466.05	4811.03	4811.5	5591.42	5674.82
P29692-2	P29692;P29692-2	EF1D_HUMAN	EEF1D	Isoform 2 of Elongation factor 1-delta	6732.17	10401.9	9153.66	9224.22	9711.55	11042.3
P29728-2	P29728;P29728-2	OAS2_HUMAN	OAS2	Isoform p69 of 2'-5'-oligoadenylate synthase 2	15134	17321	17404.5	16719.9	16861.8	17676.8
P29966	P29966	MARCS_HUMAN	MARCKS	Myristoylated alanine-rich C-kinase substrate	7582.65	8164.37	5303.77	7908.38	5822.07	5110.98
P29992	P29992	GNA11_HUMAN	GNA11	Guanine nucleotide-binding protein subunit alpha-11	9360.69	9757.35	7773.65	10570.8	13513.8	12869.7
P30038	P30038;P30038-2;P30038-3	AL4A1_HUMAN	ALDH4A1	Delta-1-pyrroline-5-carboxylate dehydrogenase, mitochondrial	24395.5	21859.8	24806.7	22932.5	24086.3	29741.2
P30040	P30040	ERP29_HUMAN	ERP29	Endoplasmic reticulum resident protein 29	7294.79	10064.8	9752.95	7812.7	7452.89	8355.62
P30041	P30041	PRDX6_HUMAN	PRDX6	Peroxiredoxin-6	143537	162430	164208	156432	146571	153165
P30043	P30043	BLVRB_HUMAN	BLVRB	Flavin reductase (NADPH)	20942	23865.4	26425.7	24363.9	20248.1	25966.5
P30044	P30044;P30044-2;P30044-3	PRDX5_HUMAN	PRDX5	Peroxiredoxin-5, mitochondrial	5354.69	4906.78	5246.39	4637.9	2781.77	5710.77
P30048;P30048-2	P30048;P30048-2	PRDX3_HUMAN	PRDX3	Thioredoxin-dependent peroxide reductase, mitochondrial	39779	42499.1	38965.5	35823.6	33986.3	40260
P30050	P30050	RL12_HUMAN	RPL12	Large ribosomal subunit protein uL11	110341	106370	128341	120641	116718	117650
P30084	P30084	ECHM_HUMAN	ECHS1	Enoyl-CoA hydratase, mitochondrial	33095.6	36235.7	38056.4	38018.5	39145.1	37680
P30085	P30085;P30085-3	KCY_HUMAN	CMPK1	UMP-CMP kinase	9693.71	10940.6	10604.3	10209.7	11207.9	11584.9
P30101	P30101	PDIA3_HUMAN	PDIA3	Protein disulfide-isomerase A3	31141	34075.5	32556.2	32265.6	32808.7	35035.8
P30153	P30153	2AAA_HUMAN	PPP2R1A	Serine/threonine-protein phosphatase 2A 65 kDa regulatory subunit A alpha isoform	56916.1	70873.9	70514.6	63849	61597.1	64200
P30154	P30154;P30154-4;P30154-5	2AAB_HUMAN	PPP2R1B	Serine/threonine-protein phosphatase 2A 65 kDa regulatory subunit A beta isoform	15660.8	15207.8	17814.1	15449.1	16368.6	16828.1
P30260;P30260-2	P30260;P30260-2	CDC27_HUMAN	CDC27	Cell division cycle protein 27 homolog	9758.89	11008.6	9534.52	9788.55	9694.16	8720.81
P30279	P30279;P30279-2	CCND2_HUMAN	CCND2	G1/S-specific cyclin-D2	39815.6	45032.5	42346.8	39040.4	49588.2	39584.1
P30281	P30281;P30281-2	CCND3_HUMAN	CCND3	G1/S-specific cyclin-D3	5851.08	6930.53	7417.41	6320.63	6531.45	4964
P30291	P30291	WEE1_HUMAN	WEE1	Wee1-like protein kinase	3884.05	4440.87	3917.96	3730.46	5776.89	4482.42
P30307;P30307-2	P30307;P30307-2;P30307-3;P30307-4	MPIP3_HUMAN	CDC25C	M-phase inducer phosphatase 3	12078.9	10567.2	10545.8	10101.3	11396.2	11884.6
P30405;P30405-2	P30405;P30405-2	PPIF_HUMAN	PPIF	Peptidyl-prolyl cis-trans isomerase F, mitochondrial	4674.48	4481.55		1755.18	9578.26	10167.3
P30419	P30419;P30419-2	NMT1_HUMAN	NMT1	Glycylpeptide N-tetradecanoyltransferase 1	8032.58	7310.16	4505.9	6240.32	5637.42	5899.28
P30519;P30519-2	P30519;P30519-2	HMOX2_HUMAN	HMOX2	Heme oxygenase 2	7864.71	8202.66	8627.38	7913.1	8388.77	9239.11
P30520	P30520	PURA2_HUMAN	ADSS2	Adenylosuccinate synthetase isozyme 2	20565.8	20271.7	20385.8	19031.6	19713.7	18524.4
P30566	P30566	PUR8_HUMAN	ADSL	Adenylosuccinate lyase	10909.5	11966.7	10730	9900.83	8717.19	10382.3
P30622;P30622-1;P30622-2	P30622;P30622-1;P30622-2	CLIP1_HUMAN	CLIP1	CAP-Gly domain-containing linker protein 1	1475.09	1957.08	2031.47	1739.41	2467.46	1913.37
P30837	P30837	AL1B1_HUMAN	ALDH1B1	Aldehyde dehydrogenase X, mitochondrial	23479.7	23564.2	22158.6	20105.4	22340.3	23742.3
P30838	P30838	AL3A1_HUMAN	ALDH3A1	Aldehyde dehydrogenase, dimeric NADP-preferring	9454.74	7537.3	8675.26	8358.96	7487.09	10276.7
P30876	P30876	RPB2_HUMAN	POLR2B	DNA-directed RNA polymerase II subunit RPB2	24067.1	21683.1	20373.4	24563.9	23422	24911.4
P31040;P31040-2	P31040;P31040-2;P31040-3	SDHA_HUMAN	SDHA	Succinate dehydrogenase [ubiquinone] flavoprotein subunit, mitochondrial	7493.96	9811.92	8620.64	8439.15	7219.16	7779.27
P31146	P31146	COR1A_HUMAN	CORO1A	Coronin-1A	2695.9	3246.8	3286.76	3777	2105.11	3050.42
P31150	P31150	GDIA_HUMAN	GDI1	Rab GDP dissociation inhibitor alpha	5900.62	7922.17	6399.06	5398.76	5090.88	6346.46
P31151	P31151;Q86SG5	S10A7_HUMAN	S100A7	Protein S100-A7	2684.52	1951.07	8663.38	2495.94	2203.98	1243.24
P31153	P31153;P31153-2	METK2_HUMAN	MAT2A	S-adenosylmethionine synthase isoform type-2	198730	209027	190570	212517	217278	211034
P31321	P31321	KAP1_HUMAN	PRKAR1B	cAMP-dependent protein kinase type I-beta regulatory subunit	3335.06	7028.93	3961.63	5871.9	5785.42	5684.45
P31323	P31323	KAP3_HUMAN	PRKAR2B	cAMP-dependent protein kinase type II-beta regulatory subunit	2387.28	2320.82	2712.41	2334.17	2246.33	3627.28
P31327;P31327-2;P31327-3	P31327;P31327-2;P31327-3	CPSM_HUMAN	CPS1	Carbamoyl-phosphate synthase [ammonia], mitochondrial	7027.98	6464.02	5640.58	6845.05	6260.06	6153.95
P31350;P31350-2	P31350;P31350-2	RIR2_HUMAN	RRM2	Ribonucleoside-diphosphate reductase subunit M2	160208	156933	165106	189193	179857	152281
P31483-3	P31483;P31483-2;P31483-3	TIA1_HUMAN	TIA1	Isoform 3 of Cytotoxic granule associated RNA binding protein TIA1			574.757
P31689	P31689;P31689-2	DNJA1_HUMAN	DNAJA1	DnaJ homolog subfamily A member 1	24262.2	20516.1	20813	20711.1	23989.7	22743.6
P31749	P31749;P31749-2	AKT1_HUMAN	AKT1	RAC-alpha serine/threonine-protein kinase	6803.54	6162.9	6741.79	6944.17	6851.91	7814.59
P31751	P31751;P31751-2	AKT2_HUMAN	AKT2	RAC-beta serine/threonine-protein kinase	9701.64	8469.02	7832.59	7871.73	7789.6	9703.5
P31930	P31930	QCR1_HUMAN	UQCRC1	Cytochrome b-c1 complex subunit 1, mitochondrial	7645.14	10097.4	8925.15	8593.26	5982.32	7865.92
P31939	P31939;P31939-2	PUR9_HUMAN	ATIC	Bifunctional purine biosynthesis protein ATIC	90938.9	81006.1	98083.6	102771	99305.9	107167
P31942;P31942-2;P31942-3	P31942;P31942-2;P31942-3;P31942-4;P31942-5;P31942-6	HNRH3_HUMAN	HNRNPH3	Heterogeneous nuclear ribonucleoprotein H3	24210.9	20888	24510	23734.9	21069	27735.5
P31943	P31943	HNRH1_HUMAN	HNRNPH1	Heterogeneous nuclear ribonucleoprotein H	99418.8	100898	118822	101358	102851	121778
P31944	P31944	CASPE_HUMAN	CASP14	Caspase-14			4631.72	8039.27		2266.51
P31946;P31946-2	P31946;P31946-2	1433B_HUMAN	YWHAB	14-3-3 protein beta/alpha	24543.5	30392.7	35799.1	23755.7	24984.6	26204.4
P31947;P31947-2	P31947;P31947-2	1433S_HUMAN	SFN	14-3-3 protein sigma				898.617
P31948;P31948-2	P31948;P31948-2	STIP1_HUMAN	STIP1	Stress-induced-phosphoprotein 1	10838	7307.91	9361	8632.03	8914.97	8198.25
P32019;P32019-2	P32019;P32019-2;P32019-3	I5P2_HUMAN	INPP5B	Type II inositol 1,4,5-trisphosphate 5-phosphatase	2660.54	1624.45	2069.4	1950.52	3529.65	2800.04
P32119	P32119	PRDX2_HUMAN	PRDX2	Peroxiredoxin-2	15019	18039.6	16888.9	19020.9	15948.3	13810.7
P32121;P32121-3;P32121-4	P32121;P32121-2;P32121-3;P32121-4;P32121-5	ARRB2_HUMAN	ARRB2	Beta-arrestin-2	15067.8	13828.5	12404.9	10954.4	15033.2	13882.6
P32242	P32242	OTX1_HUMAN	OTX1	Homeobox protein OTX1	2775.6	2370.95	2969.66	3548.27	3102.21	3101.49
P32243;P32243-2	P32243;P32243-2	OTX2_HUMAN	OTX2	Homeobox protein OTX2
P32321;P32321-2	P32321;P32321-2	DCTD_HUMAN	DCTD	Deoxycytidylate deaminase	8264.3	8653.01	7500.14	8393.37	9369.58	8847.81
P32322;P32322-3	P32322;P32322-3	P5CR1_HUMAN	PYCR1	Pyrroline-5-carboxylate reductase 1, mitochondrial	64382.3	64019.2	53910.8	57778.9	52497.9	61194.8
P32519;P32519-2	P32519;P32519-2	ELF1_HUMAN	ELF1	ETS-related transcription factor Elf-1	1313.48			783.807		521.738
P32780;P32780-2	P32780;P32780-2	TF2H1_HUMAN	GTF2H1	General transcription factor IIH subunit 1	664.561	968.01	587.702	596.172		997.48
P32929	P32929;P32929-2;P32929-3	CGL_HUMAN	CTH	Cystathionine gamma-lyase	32044.8	29649.7	26987.8	26381.2	28106.7	29130.4
P32969	P32969	RL9_HUMAN	RPL9	Large ribosomal subunit protein uL6	100342	111346	117145	106043	97015	96435
P32970	P32970;P32970-2	CD70_HUMAN	CD70	CD70 antigen	21978.4	21789.1	21286.9	19712.5	16806.5	29079.4
P33121	P33121;P33121-2	ACSL1_HUMAN	ACSL1	Long-chain-fatty-acid--CoA ligase 1	25936.5	25137.9	27448.9	24116.8	25314.8	26108.5
P33176	O60282;P33176;Q12840;O60282-2	KINH_HUMAN	KIF5B	Kinesin-1 heavy chain	34397.4	32804.4	36196.7	42989.5	36593.9	48098.5
P33316;P33316-2	P33316;P33316-2	DUT_HUMAN	DUT	Deoxyuridine 5'-triphosphate nucleotidohydrolase, mitochondrial	11112.9	11779.5	12350.8	12048.8	10251.4	8782.06
P33527;P33527-2;P33527-3;P33527-5;P33527-9	P33527;P33527-2;P33527-3;P33527-4;P33527-5;P33527-6;P33527-7;P33527-8;P33527-9	MRP1_HUMAN	ABCC1	Multidrug resistance-associated protein 1	1042.25			706.675
P33981;P33981-2	P33981;P33981-2	TTK_HUMAN	TTK	Dual specificity protein kinase TTK	22364.4	20214	19064.8	21243.2	19882.8	19219.7
P33991	P33991	MCM4_HUMAN	MCM4	DNA replication licensing factor MCM4	85710.5	86591.4	86343.4	89014.3	88071.4	88167.7
P33992	P33992	MCM5_HUMAN	MCM5	DNA replication licensing factor MCM5	325559	331025	333075	387769	345418	336655
P33993	P33993;P33993-3	MCM7_HUMAN	MCM7	DNA replication licensing factor MCM7	122659	122977	124357	134131	132340	146683
P34896;P34896-2	P34896;P34896-2;P34896-3	GLYC_HUMAN	SHMT1	Serine hydroxymethyltransferase, cytosolic	6469.31	6030.45	6904.83	6576.24	6279.46	6002.36
P34897;P34897-3	P34897;P34897-2;P34897-3	GLYM_HUMAN	SHMT2	Serine hydroxymethyltransferase, mitochondrial	183071	166717	177336	209226	198134	185908
P34932	P34932	HSP74_HUMAN	HSPA4	Heat shock 70 kDa protein 4	33280.7	39271.7	32325.6	32792.9	30225.1	29039.7
P34949	P34949	MPI_HUMAN	MPI	Mannose-6-phosphate isomerase	4512.97	3555	3503.8	3873.19	4647.26	4282.15
P35052	P35052;P35052-2	GPC1_HUMAN	GPC1	Glypican-1	8714.04	11295.4	5655.2	5944.37	7033.5	6294.7
P35080;P35080-2	P35080;P35080-2	PROF2_HUMAN	PFN2	Profilin-2	18655.1	30055.2	22731.1	19666.5	19407.9	20327.1
P35125-3	P35125;P35125-3	UBP6_HUMAN	USP6	Isoform 3 of Ubiquitin carboxyl-terminal hydrolase 6				7071.11		6814.25
P35221	P26232;P35221;P26232-2;P26232-3;P26232-4;P26232-5;P26232-6;P35221-2;P35221-3	CTNA1_HUMAN	CTNNA1	Catenin alpha-1	23583.3	18827	24865.1	23872.1	23809.8	26653.8
P35222	P35222	CTNB1_HUMAN	CTNNB1	Catenin beta-1	11640.5	11142.7	11116.5	10664.2	10493	11722.1
P35226	P35226	BMI1_HUMAN	BMI1	Polycomb complex protein BMI-1	2438.53	2002.64	2212.22	2009.23	2432.35	2162.63
P35232	P35232;P35232-2	PHB1_HUMAN	PHB1	Prohibitin 1	64037.9	58315.3	60006.5	54464.5	59399.2	61479.2
P35237	P35237	SPB6_HUMAN	SERPINB6	Serpin B6	11234	15510.9	11639.2	15039.2	11771.4	11427.6
P35240;P35240-2;P35240-3;P35240-8	P35240;P35240-4;P35240-2;P35240-3;P35240-5;P35240-6;P35240-8	MERL_HUMAN	NF2	Merlin	3557.16	4059.87	4897.18	4124.13	3542.81	3602.62
P35244	P35244	RFA3_HUMAN	RPA3	Replication protein A 14 kDa subunit	12867.4	11534.7	14547.4	13743.1	13618.7	12063
P35249	P35249;P35249-2	RFC4_HUMAN	RFC4	Replication factor C subunit 4	29413	26830.2	28055	28084.7	29268.1	26874
P35250	P35250;P35250-2	RFC2_HUMAN	RFC2	Replication factor C subunit 2	44719.7	39598.6	43200.5	41743	43704.5	48789.6
P35251;P35251-2	P35251;P35251-2	RFC1_HUMAN	RFC1	Replication factor C subunit 1	11154.2	13818.5	12861.5	10307.4	11840.1	11614.2
P35268	P35268	RL22_HUMAN	RPL22	Large ribosomal subunit protein eL22	108869	107513	119011	114705	100868	87310.4
P35269	P35269	T2FA_HUMAN	GTF2F1	General transcription factor IIF subunit 1	7624.63	9316.21	7522.45	8969.34	6364.76	9136.82
P35270	P35270	SPRE_HUMAN	SPR	Sepiapterin reductase	14378.5	13357.7	16509.2	12781.3	14675.4	11662.8
P35326	P35326;P22531;P22532;P35325;Q9BYE4	SPR2A_HUMAN	SPRR2A	Small proline-rich protein 2A			3228.83
P35442	P35442	TSP2_HUMAN	THBS2	Thrombospondin-2	2351.34	3419.84	3763.28	3814.75	3637.34	4283.03
P35443	P35443;P49747;P49747-2	TSP4_HUMAN	THBS4	Thrombospondin-4	9289.7	11958.8	11641.4	11015.2	12265.8	10317.4
P35520	P35520;P35520-2	CBS_HUMAN	CBS	Cystathionine beta-synthase	18011.8	18731.8	18278.9	20352.6	21951.4	23748.1
P35527	P35527	K1C9_HUMAN	KRT9	Keratin, type I cytoskeletal 9	303406	362213	297151	255688	376068	134476
P35556	P35556	FBN2_HUMAN	FBN2	Fibrillin-2	14575.6	12842.8	14863.6	14244.1	15549.5	14518.2
P35573	P35573;P35573-2;P35573-3	GDE_HUMAN	AGL	Glycogen debranching enzyme	10845.1	13233	10723.8	12209.1	11151.8	11745.1
P35579	P35579;P35579-2	MYH9_HUMAN	MYH9	Myosin-9	45957.2	51596.6	53432.6	51991.4	41530.1	56223.2
P35580	P35580;Q7Z406;P35580-2;P35580-3;P35580-4;P35580-5;Q7Z406-2;Q7Z406-4;Q7Z406-5;Q7Z406-6	MYH10_HUMAN	MYH10	Myosin-10	15031.8	15385.5	16230.4	15377.6	12493.2	18759.8
P35606;P35606-2	P35606;P35606-2	COPB2_HUMAN	COPB2	Coatomer subunit beta'	56773.6	54163.8	53971.9	55438.9	55773.9	53074.2
P35610	P35610	SOAT1_HUMAN	SOAT1	Sterol O-acyltransferase 1	2300.36	2005.55	1813.03	1828.63	2781.67	852.146
P35611;P35611-2;P35611-3;P35611-6	P35611;P35611-2;P35611-3;P35611-4;P35611-5;P35611-6	ADDA_HUMAN	ADD1	Alpha-adducin	60400.2	60841.5	61027.2	63173.2	64728.6	65973.6
P35612	P35612;P35612-2;P35612-3;P35612-4;P35612-8;P35612-9	ADDB_HUMAN	ADD2	Beta-adducin	30995.6	29094.8	30298.2	31499.8	34842.2	33428
P35613;P35613-2	P35613;P35613-2;P35613-3;P35613-4	BASI_HUMAN	BSG	Basigin	6996.54	6347.47	7475.47	7460.39	8188.06	7419.45
P35637;P35637-2	P35637;P35637-2	FUS_HUMAN	FUS	RNA-binding protein FUS	2698.65	2833.63	2034.85	2045.8	1436.15	2522.29
P35658-3;P35658-4	P35658;P35658-2;P35658-3;P35658-4;P35658-5	NU214_HUMAN	NUP214	Isoform 3 of Nuclear pore complex protein Nup214	94611.4	85065.3	88507	97179.9	95249.2	101227
P35659	P35659;P35659-2	DEK_HUMAN	DEK	Protein DEK	5177.18	6246.22	6143.63	5195.77	6074.91	5205.29
P35711;P35711-2;P35711-4;P35711-5	P35711;P35711-4;P35711-2;P35711-5	SOX5_HUMAN	SOX5	Transcription factor SOX-5	2953.88	2610.66	2960.72	4899.49	2341.17	2552.42
P35790;P35790-2	P35790;P35790-2	CHKA_HUMAN	CHKA	Choline kinase alpha	11509.9	7820.16	8226.24	6766.07	9184.63	8494.24
P35813;P35813-3	O75688;P35813;O75688-2;O75688-4;O75688-5;P35813-2;P35813-3	PPM1A_HUMAN	PPM1A	Protein phosphatase 1A		5623.31	6225.73	6188.94	6864.32	5818.73
P35908	P35908	K22E_HUMAN	KRT2	Keratin, type II cytoskeletal 2 epidermal	108182	219617	281505	199468	112820	88403.3
P35914	P35914;P35914-2;P35914-3	HMGCL_HUMAN	HMGCL	Hydroxymethylglutaryl-CoA lyase, mitochondrial	2378.98	1864.8	2920.58	3212.31	2778.99	3152.74
P35998	P35998;P35998-2	PRS7_HUMAN	PSMC2	26S proteasome regulatory subunit 7	102722	111500	118419	111150	120358	127502
P36404	P36404	ARL2_HUMAN	ARL2	ADP-ribosylation factor-like protein 2	31773.7	32286.3	31274	31466.7	31756.4	26893.5
P36405	P36405	ARL3_HUMAN	ARL3	ADP-ribosylation factor-like protein 3	7393.53	8211.6	8943.19	11512.9	10111.6	9811.56
P36507	P36507;Q02750;Q02750-2	MP2K2_HUMAN	MAP2K2	Dual specificity mitogen-activated protein kinase kinase 2	118207	104578	116187	110029	101545	127915
P36542	P36542;P36542-2	ATPG_HUMAN	ATP5F1C	ATP synthase subunit gamma, mitochondrial	11730.1	14325	13135.2	9706.99	13435.5	11442.4
P36543	P36543;P36543-2	VATE1_HUMAN	ATP6V1E1	V-type proton ATPase subunit E 1	54023.1	47984.1	43474.6	54496.5	62370.4	49805.8
P36551	P36551;P36551-2	HEM6_HUMAN	CPOX	Oxygen-dependent coproporphyrinogen-III oxidase, mitochondrial	7699.04	7711.02	8460.3	8418.21	9976.75	8195
P36578	P36578	RL4_HUMAN	RPL4	Large ribosomal subunit protein uL4	117636	122080	157419	103659	111662	131787
P36639;P36639-1;P36639-2;P36639-3	P36639;P36639-1;P36639-2;P36639-3	8ODP_HUMAN	NUDT1	Oxidized purine nucleoside triphosphate hydrolase	218.806	344.058		452.981
P36776;P36776-2	P36776;P36776-2;P36776-3	LONM_HUMAN	LONP1	Lon protease homolog, mitochondrial	112950	106133	117436	121938	125532	128883
P36871	P36871;P36871-2;P36871-3	PGM1_HUMAN	PGM1	Phosphoglucomutase-1	6256.92	5703.58	6528.37	5028.89	6061.14	6788.56
P36897;P36897-2;P36897-3	P36897;P36897-2;P36897-3	TGFR1_HUMAN	TGFBR1	TGF-beta receptor type-1	2747.77	2447.82	1735.66	3448.22	2614.89	2722.3
P36915	P36915;P36915-2	GNL1_HUMAN	GNL1	Guanine nucleotide-binding protein-like 1	15065.5	14950.1	18431.9	17027.9	16090.8	19524
P36955	P36955	PEDF_HUMAN	SERPINF1	Pigment epithelium-derived factor	57449.2	54118.7	57282	55280.6	56706	60682.1
P36957	P36957	ODO2_HUMAN	DLST	Dihydrolipoyllysine-residue succinyltransferase component of 2-oxoglutarate dehydrogenase complex, mitochondrial	5911.42	6167.94	4474.24	6412.87	5455.7	5160.85
P36959	P36959	GMPR1_HUMAN	GMPR	GMP reductase 1			3652.98	3591.51		4101.4
P37108	P37108	SRP14_HUMAN	SRP14	Signal recognition particle 14 kDa protein	20344.7	16393.6	18031.3	17630.8	18516.9	22162.9
P37198	P37198	NUP62_HUMAN	NUP62	Nuclear pore glycoprotein p62	7191.03	4728.38	5926.34	9074.28	6784.97	6372.63
P37235	P37235	HPCL1_HUMAN	HPCAL1	Hippocalcin-like protein 1
P37268	P37268;P37268-2;P37268-3;P37268-4;P37268-5	FDFT_HUMAN	FDFT1	Squalene synthase	25636.6	23828.7	28747.7	25568.8	27534.6	27244.5
P37802;P37802-2	P37802;P37802-2	TAGL2_HUMAN	TAGLN2	Transgelin-2	11450.5	9607.18	9184.83	6449.52	8312.91	7715.97
P37837	P37837;P37837-2	TALDO_HUMAN	TALDO1	Transaldolase	18567.7	18028.5	18993	18309	16856.3	18475.7
P38117;P38117-2	P38117;P38117-2	ETFB_HUMAN	ETFB	Electron transfer flavoprotein subunit beta	316955	267838	318408	318592	353599	341403
P38159;Q96E39	P38159;Q96E39;P38159-2;P38159-3	RBMX_HUMAN;RMXL1_HUMAN	RBMX;RBMXL1	RNA-binding motif protein, X chromosome	9288.64	6434.9	6901.89	8364.36	7684.27	7915.3
P38432	P38432	COIL_HUMAN	COIL	Coilin
P38571;P38571-2	P38571;P38571-2	LICH_HUMAN	LIPA	Lysosomal acid lipase/cholesteryl ester hydrolase	4648.26	7815.16	8828.55	7393.7	6180.56	5713.03
P38606;P38606-2	P38606;P38606-2	VATA_HUMAN	ATP6V1A	V-type proton ATPase catalytic subunit A	25859.9	24628	28539.8	26249.1	23921.5	31801.4
P38646	P38646	GRP75_HUMAN	HSPA9	Stress-70 protein, mitochondrial	359689	319942	360009	386480	345663	361662
P38919	P38919	IF4A3_HUMAN	EIF4A3	Eukaryotic initiation factor 4A-III	98643.1	96077.1	99220	101017	98821.1	95623.7
P38935	P38935	SMBP2_HUMAN	IGHMBP2	DNA-binding protein SMUBP-2	5069.25	6102.73	6128.65	5452.23	5811.42	7038.38
P39019	P39019	RS19_HUMAN	RPS19	Small ribosomal subunit protein eS19	84539	86719.7	106627	80467.7	74757.6	101139
P39023	P39023	RL3_HUMAN	RPL3	Large ribosomal subunit protein uL3	377204	357910	344548	349555	337720	373519
P39656	P39656;P39656-2;P39656-3	OST48_HUMAN	DDOST	Dolichyl-diphosphooligosaccharide--protein glycosyltransferase 48 kDa subunit	27581.1	29661.5	24328.1	28561.5	25758.8	23215.1
P39687	P39687;O43423	AN32A_HUMAN	ANP32A	Acidic leucine-rich nuclear phosphoprotein 32 family member A	11517.3	31775.7				6540.1
P39748	P39748;P39748-2	FEN1_HUMAN	FEN1	Flap endonuclease 1	41581.4	33469.3	44060.9	39550.6	36421.3	47618.4
P39880;P39880-2;P39880-3;P39880-5	P39880;P39880-2;P39880-3;P39880-5	CUX1_HUMAN	CUX1	Homeobox protein cut-like 1		3943.91			1615.84	1591.84
P40123;P40123-2	P40123;P40123-2	CAP2_HUMAN	CAP2	Adenylyl cyclase-associated protein 2
P40222	P40222	TXLNA_HUMAN	TXLNA	Alpha-taxilin	2585.78		2521.87	2684.53	2838.98	2872.45
P40227	P40227;P40227-2	TCPZ_HUMAN	CCT6A	T-complex protein 1 subunit zeta	114117	109077	102843	116992	124825	113462
P40424;P40424-2;P40424-3	P40424;P40425;P40426;P40424-2;P40424-3;P40426-2;P40426-3;P40426-4;P40426-5	PBX1_HUMAN	PBX1	Pre-B-cell leukemia transcription factor 1	18563.7	17483.3	18676	18395.6	20200.1	22887.5
P40425	P40425	PBX2_HUMAN	PBX2	Pre-B-cell leukemia transcription factor 2	17783.2	14815.2	15578.2	17442.3	17946	19104.2
P40426;P40426-2;P40426-5	P40426;P40426-2;P40426-5	PBX3_HUMAN	PBX3	Pre-B-cell leukemia transcription factor 3	11835.9	7939.53	8755.65	11814.3	9802.32	14398.1
P40429	P40429;Q6NVV1	RL13A_HUMAN	RPL13A	Large ribosomal subunit protein uL13	64595.8	48949.9	62290.8	56532.4	56356.4	64518.1
P40616;P40616-2	P40616;P40616-2	ARL1_HUMAN	ARL1	ADP-ribosylation factor-like protein 1	29819.5	34251.5	34725.2	34692.5	26425.5	26954.4
P40692	P40692;P40692-3	MLH1_HUMAN	MLH1	DNA mismatch repair protein Mlh1	18424.5	20878.1	20874.8	18005.8	17298.7	18735.9
P40763-2	P40763-2	STAT3_HUMAN	STAT3	Isoform Del-701 of Signal transducer and activator of transcription 3	1243.53	2122.87	2697.2	2018.19	1766.69	1998.65
P40763-3	P40763;P40763-2;P40763-3	STAT3_HUMAN	STAT3	Isoform 3 of Signal transducer and activator of transcription 3	28346.4	31042.7	29118.7	30230	26450.2	29825.4
P40818	P40818;P40818-2	UBP8_HUMAN	USP8	Ubiquitin carboxyl-terminal hydrolase 8	9503.03	8474.82	6436.02	148526	160687	126405
P40925;P40925-2;P40925-3	P40925;P40925-2;P40925-3	MDHC_HUMAN	MDH1	Malate dehydrogenase, cytoplasmic	6230.1	9144.99	7797.27	7343.52	8483.91	10708.5
P40926	P40926;P40926-2	MDHM_HUMAN	MDH2	Malate dehydrogenase, mitochondrial	39511.5	37720	37143.2	38776.2	40614.1	42154.7
P40937;P40937-2	P40937;P40937-2	RFC5_HUMAN	RFC5	Replication factor C subunit 5	70762.4	71283.3	74380	74338.5	66484.7	67000.3
P40938	P40938;P40938-2	RFC3_HUMAN	RFC3	Replication factor C subunit 3	15556.3	17092.2	15923.9	13962.8	13287.9	14967.1
P40939	P40939	ECHA_HUMAN	HADHA	Trifunctional enzyme subunit alpha, mitochondrial	127898	129899	129539	125128	120235	130182
P41091	P41091;Q2VIR3;Q2VIR3-2	IF2G_HUMAN	EIF2S3	Eukaryotic translation initiation factor 2 subunit 3	76591.7	84473.7	95550.9	96866.2	85828.2	91868.4
P41162	P41162	ETV3_HUMAN	ETV3	ETS translocation variant 3	1491.93	1668.81	1952.74	1405.32	1547.01	1828.78
P41212	P41212	ETV6_HUMAN	ETV6	Transcription factor ETV6	2962.13	2960.31	3986.53	3533.58	4434.52	4398.83
P41214	P41214	EIF2D_HUMAN	EIF2D	Eukaryotic translation initiation factor 2D	57095.1	43120.4	54328.4	54966.2	57135.2	63095.2
P41223	P41223;P41223-2	BUD31_HUMAN	BUD31	Protein BUD31 homolog	8778.89	8979.09	8978.34	9155.88	11048.5	9666.15
P41227;P41227-2	P41227;Q9BSU3;P41227-2	NAA10_HUMAN	NAA10	N-alpha-acetyltransferase 10	14360.2	15989.8	15161.7	15305	13632.8	15625.1
P41229;P41229-2;P41229-5	P41229;P41229-2;P41229-3;P41229-4;P41229-5	KDM5C_HUMAN	KDM5C	Lysine-specific demethylase 5C	9593.49	9051.56	8961.35	8783.05	9066.88	9829.5
P41240	P41240	CSK_HUMAN	CSK	Tyrosine-protein kinase CSK	106201	106578	110924	108492	109930	110897
P41250;P41250-2	P41250;P41250-2	GARS_HUMAN	GARS1	Glycine--tRNA ligase	38108.9	37219.3	38006.8	32987.6	37614.7	39730.3
P41252	P41252	SYIC_HUMAN	IARS1	Isoleucine--tRNA ligase, cytoplasmic	119045	123886	138270	144597	142521	152499
P41743	P41743	KPCI_HUMAN	PRKCI	Protein kinase C iota type	26460	22276.3	23953.8	25603	31396.9	29562.2
P42025	P42025	ACTY_HUMAN	ACTR1B	Beta-centractin	12398.7	10217.8	10328.8	10117.2	10227	11420.7
P42126;P42126-2	P42126;P42126-2	ECI1_HUMAN	ECI1	Enoyl-CoA delta isomerase 1, mitochondrial	17173.6	24744.3	19891.3	18243.1	14670.5	18592.6
P42166	P42166;P42167;P42167-2;P42167-3	LAP2A_HUMAN	TMPO	Lamina-associated polypeptide 2, isoform alpha	35203.3	32440.3	32496.3	33704.4	34000.9	33499.7
P42167	P42167	LAP2B_HUMAN	TMPO	Lamina-associated polypeptide 2, isoforms beta/gamma
P42224	P42224;P42224-2	STAT1_HUMAN	STAT1	Signal transducer and activator of transcription 1-alpha/beta	96270.6	101185	101806	98016.7	92627.1	100613
P42226;P42226-2;P42226-3	P42226;P42226-2;P42226-3	STAT6_HUMAN	STAT6	Signal transducer and activator of transcription 6	3431.39	2839.03	2395.51	2948.04	2828.86	1314.85
P42285	P42285	MTREX_HUMAN	MTREX	Exosome RNA helicase MTR4	22120.9	20716.5	23614	21906.4	18768.6	21105.8
P42336	P42336	PK3CA_HUMAN	PIK3CA	Phosphatidylinositol 4,5-bisphosphate 3-kinase catalytic subunit alpha isoform	2097.72	1754.64	1980.22	2512.91	3175	3323.01
P42345	P42345	MTOR_HUMAN	MTOR	Serine/threonine-protein kinase mTOR	17458.7	17282.5	16741.2	17264.7	17715.5	17224
P42356	P42356;P42356-2	PI4KA_HUMAN	PI4KA	Phosphatidylinositol 4-kinase alpha	11226	13425.1	16606.2	16327.7	13297	17249.6
P42566	P42566;P42566-2	EPS15_HUMAN	EPS15	Epidermal growth factor receptor substrate 15	1341.8	1293.73	1583.38		1567.69	1980.09
P42574	P42574	CASP3_HUMAN	CASP3	Caspase-3	21054.2	21812.8	20918.3	23356	17009.3	18704.7
P42575	P42575;P42575-2;P42575-3	CASP2_HUMAN	CASP2	Caspase-2	2921.88	2632.84	2746.55	2676.66	3261.75	1947.42
P42677	P42677;Q71UM5	RS27_HUMAN	RPS27	Small ribosomal subunit protein eS27	224286	224853	195399	208825	185199	227737
P42679;P42679-2;P42679-3	P42679;P42679-2;P42679-3	MATK_HUMAN	MATK	Megakaryocyte-associated tyrosine-protein kinase		1300.04	465.589	788.63	1009.23	910.448
P42684;P42684-6	P42684;P42684-5;P42684-6;P42684-7;P42684-8	ABL2_HUMAN	ABL2	Tyrosine-protein kinase ABL2	15703	14661.3	15556.1	12030.6	15023.8	16267
P42694	P42694;P42694-2	HELZ_HUMAN	HELZ	Probable helicase with zinc finger domain	6434.06	7187.62	7328.46	7213.36	7047.87	6774.88
P42695	P42695	CNDD3_HUMAN	NCAPD3	Condensin-2 complex subunit D3	23468.6	26675.4	26242.2	25733.3	25601.6	27179.4
P42696	P42696;P42696-2	RBM34_HUMAN	RBM34	RNA-binding protein 34	13602.5	14999.4	8496.6	18299.5	11146	9924.78
P42704	P42704	LPPRC_HUMAN	LRPPRC	Leucine-rich PPR motif-containing protein, mitochondrial	300504	297108	303038	305587	311732	299335
P42765	P42765	THIM_HUMAN	ACAA2	3-ketoacyl-CoA thiolase, mitochondrial	12418.1	13340.5	11963.4	11466.9	10711.8	10713.1
P42766	P42766	RL35_HUMAN	RPL35	Large ribosomal subunit protein uL29	39254.9	36777.8	33540.1	38514.2	52365.5	37879.4
P42785	P42785;P42785-2	PCP_HUMAN	PRCP	Lysosomal Pro-X carboxypeptidase	11158.2	9007.9	10339.4	11210.8	10911.9	11036.6
P42858	P42858	HD_HUMAN	HTT	Huntingtin	25746.8	26400.2	26356	25106.8	25346.7	24572.6
P43034	P43034	LIS1_HUMAN	PAFAH1B1	Platelet-activating factor acetylhydrolase IB subunit beta	20469.5	22040.7	17033.9	23318.9	22800.3	16902.9
P43243	P43243;P43243-2	MATR3_HUMAN	MATR3	Matrin-3	190242	166278	191884	191059	215533	200797
P43246	P43246;P43246-2	MSH2_HUMAN	MSH2	DNA mismatch repair protein Msh2	189247	185518	185119	194986	192253	175472
P43250;P43250-2;P43250-3	P43250;P43250-2;P43250-3	GRK6_HUMAN	GRK6	G protein-coupled receptor kinase 6				1786.37	1524.88	1364.79
P43304;P43304-2	P43304;P43304-2	GPDM_HUMAN	GPD2	Glycerol-3-phosphate dehydrogenase, mitochondrial	3505.86	2702.86	3688.61	3459.93	2683.65	2182.4
P43378	P43378	PTN9_HUMAN	PTPN9	Tyrosine-protein phosphatase non-receptor type 9	25139.9	25439	24380.9	24896.1	24133.8	21225.8
P43405;P43405-2	P43405;P43405-2	KSYK_HUMAN	SYK	Tyrosine-protein kinase SYK	5203.14	5361.44	4994.74	4744.15	4338.5	4706.21
P43487;P43487-2	P43487;P43487-2	RANG_HUMAN	RANBP1	Ran-specific GTPase-activating protein	9716.07	12605	11025.8	15219.3	15210.9	15050.7
P43490	P43490	NAMPT_HUMAN	NAMPT	Nicotinamide phosphoribosyltransferase	44363.9	38381	36680.2	37876.8	37723.7	36760.5
P43686	P43686;P43686-2	PRS6B_HUMAN	PSMC4	26S proteasome regulatory subunit 6B	81377.2	74802	78846.6	79813.2	74134.4	76220.6
P43897	P43897;P43897-2	EFTS_HUMAN	TSFM	Elongation factor Ts, mitochondrial	35274.2	47224.9	47716.4	45296.9	42258	43865.1
P45880	P45880;P45880-1;P45880-2	VDAC2_HUMAN	VDAC2	Voltage-dependent anion-selective channel protein 2	128807	160658	130574	128279	124756	107540
P45954	P45954;P45954-2	ACDSB_HUMAN	ACADSB	Short/branched chain specific acyl-CoA dehydrogenase, mitochondrial	54932.4	49634.7	48405.7	49066.8	54575.8	53115.5
P45973	P45973	CBX5_HUMAN	CBX5	Chromobox protein homolog 5	4419.24	8307.47	4554.13	2304.52	4227.35	2111.21
P45974-2	P45974;P45974-2	UBP5_HUMAN	USP5	Isoform Short of Ubiquitin carboxyl-terminal hydrolase 5	18491.6	16616.1	15718.5	563263	690044	520337
P45983;P45983-2;P45983-3;P45983-4	P45983;P53779;P45983-2;P45983-3;P45983-4;P53779-2;P53779-3	MK08_HUMAN	MAPK8	Mitogen-activated protein kinase 8	6067.46	7542.75	9025.37	7558.21	6557.04	7052.85
P45985;P45985-2	P45985;P45985-2	MP2K4_HUMAN	MAP2K4	Dual specificity mitogen-activated protein kinase kinase 4	64021.1	63949.4	69674.7	72161	64704.1	71745.6
P46013	P46013	KI67_HUMAN	MKI67	Proliferation marker protein Ki-67	31671.3	31967.2	27925.5	31360	31251.7	30498.4
P46013-2	P46013-2	KI67_HUMAN	MKI67	Isoform Short of Proliferation marker protein Ki-67	7452.41	6052.53	5073.7	7761.75	7275.61	7735.88
P46019	P46019	KPB2_HUMAN	PHKA2	Phosphorylase b kinase regulatory subunit alpha, liver isoform	9553.85	6226.44	8215.26	8751.18	8467.37	11271.5
P46020;P46020-2	P46020;P46020-2	KPB1_HUMAN	PHKA1	Phosphorylase b kinase regulatory subunit alpha, skeletal muscle isoform	20782.4	21971	21820	21892	19659.8	21226.8
P46060	P46060	RAGP1_HUMAN	RANGAP1	Ran GTPase-activating protein 1	159266	164235	168193	161868	166188	149707
P46063	P46063	RECQ1_HUMAN	RECQL	ATP-dependent DNA helicase Q1	9284.06	11747	9816.04	10668.6	10496.5	8653.32
P46087;P46087-2;P46087-4	P46087;P46087-2;P46087-3;P46087-4	NOP2_HUMAN	NOP2	Probable 28S rRNA (cytosine(4447)-C(5))-methyltransferase	10249.6	10067.9	9446.85	10446.6	9447.03	10790.3
P46109	P46109	CRKL_HUMAN	CRKL	Crk-like protein				7998.94		4353.68
P46199	P46199	IF2M_HUMAN	MTIF2	Translation initiation factor IF-2, mitochondrial	11007.3	9842.65	9960.04	10638.9	11217	8308.39
P46379;P46379-2;P46379-3	P46379;P46379-2;P46379-3;P46379-4;P46379-5	BAG6_HUMAN	BAG6	Large proline-rich protein BAG6	132023	125384	115889	126924	116105	117622
P46459	P46459;P46459-2	NSF_HUMAN	NSF	Vesicle-fusing ATPase	96577.5	90428.2	87457.5	98516.1	102326	88874.7
P46527	P46527	CDN1B_HUMAN	CDKN1B	Cyclin-dependent kinase inhibitor 1B			1356.66
P46734;P46734-2;P46734-3	P46734;P46734-2;P46734-3	MP2K3_HUMAN	MAP2K3	Dual specificity mitogen-activated protein kinase kinase 3	13197.2	11681.2	12929.3	13451.5	12800.1	13427.5
P46736;P46736-2;P46736-3	P46736;P46736-2;P46736-3;P46736-4;P46736-5	BRCC3_HUMAN	BRCC3	Lys-63-specific deubiquitinase BRCC36	12731.4	12621.9	11955.6	12241.7	11323.3	10221.3
P46776	P46776	RL27A_HUMAN	RPL27A	Large ribosomal subunit protein uL15	790987	700069	772368	686547	606550	717368
P46777	P46777	RL5_HUMAN	RPL5	Large ribosomal subunit protein uL18	91110.4	92601	104101	85529.4	79400.3	101589
P46778	P46778	RL21_HUMAN	RPL21	Large ribosomal subunit protein eL21	42192.4	28756.3	31145.4	32836.2	30694	47359.4
P46779;P46779-2;P46779-3;P46779-4;P46779-5	P46779;P46779-2;P46779-3;P46779-4;P46779-5	RL28_HUMAN	RPL28	Large ribosomal subunit protein eL28	70307.6	73531.6	69559.7	56491.2	64638.2	70644.8
P46781	P46781	RS9_HUMAN	RPS9	Small ribosomal subunit protein uS4	144822	119814	121222	125261	126405	128855
P46782	P46782	RS5_HUMAN	RPS5	Small ribosomal subunit protein uS7	49207.9	62161.6	78258.1	53676.6	51279.5	64877
P46783	P46783;Q9NQ39	RS10_HUMAN	RPS10	Small ribosomal subunit protein eS10	308629	331785	342165	308107	258587	373377
P46821	P46821	MAP1B_HUMAN	MAP1B	Microtubule-associated protein 1B	45728.2	44285	45978.2	43904.4	41740.4	42982.9
P46926	P46926;Q8TDQ7;Q8TDQ7-2;P46926-2;Q8TDQ7-3	GNPI1_HUMAN	GNPDA1	Glucosamine-6-phosphate isomerase 1	14101	14885.7	14065	15820.1	14338.4	13187.9
P46934-4	P46934;P46934-3;P46934-4;P46934-2	NEDD4_HUMAN	NEDD4	Isoform 4 of E3 ubiquitin-protein ligase NEDD4	8789.88	11151.9	6716.92	7734.92	5583.83	9334.86
P46939;P46939-2	P46939;P46939-2	UTRN_HUMAN	UTRN	Utrophin	19656.8	15980.9	17847.8	18553.7	18027.7	18966.6
P46940	P46940	IQGA1_HUMAN	IQGAP1	Ras GTPase-activating-like protein IQGAP1	155802	145274	161195	170552	159730	159071
P46976;P46976-2	P46976;P46976-2	GLYG_HUMAN	GYG1	Glycogenin-1	9576.64	10513.2	9269.98	9314.71	9899.98	11112.6
P46977-2	P46977;P46977-2	STT3A_HUMAN	STT3A	Isoform 2 of Dolichyl-diphosphooligosaccharide--protein glycosyltransferase subunit STT3A	10607	13111.9	10172.9	10829.7	9301.33	8792.24
P47712	P47712	PA24A_HUMAN	PLA2G4A	Cytosolic phospholipase A2	9604.55	10514.8	8729.78	9304.72	6994.73	9274.73
P47755	P47755	CAZA2_HUMAN	CAPZA2	F-actin-capping protein subunit alpha-2	6218.33	10057.6	9098.12	8598.81	7597.49	5578.67
P47756	P47756;P47756-1	CAPZB_HUMAN	CAPZB	F-actin-capping protein subunit beta	49962.7	64403.8	52017.9	51246.7	50520.7	39079.1
P47895	P47895	AL1A3_HUMAN	ALDH1A3	Retinaldehyde dehydrogenase 3	5329.18	3602	5922.03	4179.72	3198.42	5083.69
P47897	P47897;P47897-2	SYQ_HUMAN	QARS1	Glutamine--tRNA ligase	104459	113301	128604	132815	123859	143375
P47914	P47914	RL29_HUMAN	RPL29	Large ribosomal subunit protein eL29	42607.3	21290.2	25573.9	36666.8	46782.4	57392.3
P47929	P47929	LEG7_HUMAN	LGALS7	Galectin-7		3407.98	14578.8			7640.04
P47974	P47974	TISD_HUMAN	ZFP36L2	mRNA decay activator protein ZFP36L2	5009.9	6562.8	5883.97	5840.02	6221.47	6530.51
P47985	P47985;P0C7P4	UCRI_HUMAN	UQCRFS1	Cytochrome b-c1 complex subunit Rieske, mitochondrial	21445.3	19616.1	17484.3	21355.5	19514.2	17819
P48047	P48047	ATPO_HUMAN	ATP5PO	ATP synthase subunit O, mitochondrial	26245.1	20074.5	19931.6	20806.8	23404.5	21283
P48059;P48059-2;P48059-3;P48059-4;P48059-5	P48059;P48059-3;P48059-2;P48059-4;P48059-5	LIMS1_HUMAN	LIMS1	LIM and senescent cell antigen-like-containing domain protein 1	12485.5	14655.8	16771.4	16406.2	16455.8	14321.7
P48147	P48147	PPCE_HUMAN	PREP	Prolyl endopeptidase	6156.84	2205.72	4175	5074.14	3968.11	3082.24
P48200	P48200	IREB2_HUMAN	IREB2	Iron-responsive element-binding protein 2	775.937	676.322	336.699	504.708	563.94	778.939
P48380;P48380-2	P48378;P48380;P48378-2;P48380-2;P48380-3	RFX3_HUMAN	RFX3	Transcription factor RFX3	9559.4	7765.62	6578.57	7175.98	7007.81	7623.8
P48426;P48426-2	P48426;P48426-2	PI42A_HUMAN	PIP4K2A	Phosphatidylinositol 5-phosphate 4-kinase type-2 alpha	10908.2	11559.8	11248.4	10482	12347.1	12106.9
P48431	P48431	SOX2_HUMAN	SOX2	Transcription factor SOX-2	2532.47	1412.8	2415.62	3111.51		3411.36
P48444	P48444	COPD_HUMAN	ARCN1	Coatomer subunit delta	252713	244414	243643	245395	265755	225973
P48449;P48449-3	P48449;P48449-2;P48449-3	LSS_HUMAN	LSS	Lanosterol synthase	20372.2	19782.1	20060.3	20585.3	18204.7	18285.2
P48454;P48454-2;P48454-3	P48454;P48454-2;P48454-3	PP2BC_HUMAN	PPP3CC	Serine/threonine-protein phosphatase 2B catalytic subunit gamma isoform		3209.11	4601.88
P48507	P48507	GSH0_HUMAN	GCLM	Glutamate--cysteine ligase regulatory subunit	13495.2	10580.9	15069.6	14556.7	15178.1	16127.3
P48553	P48553	TPC10_HUMAN	TRAPPC10	Trafficking protein particle complex subunit 10	5500.65	3558.21	4339.75	3153.17	4007.48	4216.68
P48556	P48556	PSMD8_HUMAN	PSMD8	26S proteasome non-ATPase regulatory subunit 8	34676.1	41803.6	39456.2	46732.5	37740.7	42658.9
P48634;P48634-2;P48634-3	P48634;P48634-2;P48634-3;P48634-4	PRC2A_HUMAN	PRRC2A	Protein PRRC2A	5687.44	3261.55	3153.99	3196.23	4184.84	4750.19
P48643	P48643;P48643-2	TCPE_HUMAN	CCT5	T-complex protein 1 subunit epsilon	97845.5	88589.1	96404.3	97972.2	89046.7	106839
P48651	P48651	PTSS1_HUMAN	PTDSS1	Phosphatidylserine synthase 1	915.209	1753.73	1203.42	1796.62	817.365	1219.95
P48681	P48681	NEST_HUMAN	NES	Nestin	34699.9	31148.1	34026.9	35834.2	35335	32202
P48723	P48723	HSP13_HUMAN	HSPA13	Heat shock 70 kDa protein 13	4402.33	3732.9	4926.83	4234.25	3154.73	5216.41
P48729	P48729;Q8N752;P48729-2;P48729-3	KC1A_HUMAN	CSNK1A1	Casein kinase I isoform alpha	8573.06	9862.32	9568.11	9292.94	7695.9	10762.4
P48730;P48730-2	P48730;P48730-2	KC1D_HUMAN	CSNK1D	Casein kinase I isoform delta	11262.8	8135.89	9311.97	10265.1	12433	11669.4
P48735	P48735;P48735-2	IDHP_HUMAN	IDH2	Isocitrate dehydrogenase [NADP], mitochondrial	12412	11379.6	13652.1	13526.1	14223.4	16042.2
P48739;P48739-2;P48739-3	P48739;P48739-2;P48739-3	PIPNB_HUMAN	PITPNB	Phosphatidylinositol transfer protein beta isoform	12541.4	14367.5	16364.3	13501.6	12616.4	15170.2
P48740-2;P48740-4	P48740-2;P48740-4	MASP1_HUMAN	MASP1	Isoform 2 of Man-binding lectin serine protease 1	20010.1	15326	13595.4	13281.4	17759.1	13836.6
P49005	P49005	DPOD2_HUMAN	POLD2	DNA polymerase delta subunit 2	49530.3	47958.8	48228.7	49090.2	48427.6	51762.7
P49006	P49006	MRP_HUMAN	MARCKSL1	MARCKS-related protein			1270.77		1360.57	496.872
P49023;P49023-2;P49023-3	P49023;P49023-2;P49023-3;P49023-4	PAXI_HUMAN	PXN	Paxillin
P49116	P49116;P49116-2	NR2C2_HUMAN	NR2C2	Nuclear receptor subfamily 2 group C member 2	9212.67	7808.07	7216.42	7742.51	9845.23	7776.18
P49137	P49137;P49137-2	MAPK2_HUMAN	MAPKAPK2	MAP kinase-activated protein kinase 2	7795.44	4564.86	7745.84	6011.97	6359.22	9541.41
P49189	P49189;P49189-2;P49189-3	AL9A1_HUMAN	ALDH9A1	4-trimethylaminobutyraldehyde dehydrogenase	15474.7	18318.4	15601.7	14516.8	16086.5	15344.7
P49207	P49207	RL34_HUMAN	RPL34	Large ribosomal subunit protein eL34	26940.9	25857	31042.3	21547.5	27628.9	31521.4
P49247	P49247	RPIA_HUMAN	RPIA	Ribose-5-phosphate isomerase	6896.22	6989.87	6929.25	5248.95	7108.23	7038.21
P49257	P49257	LMAN1_HUMAN	LMAN1	Protein ERGIC-53	9127.59	7871.85	8184.43	9101.71	8148.38	8773.89
P49281;P49281-2;P49281-3;P49281-4;P49281-5	P49281;P49281-3;P49281-2;P49281-4;P49281-5	NRAM2_HUMAN	SLC11A2	Natural resistance-associated macrophage protein 2			13380.4			12591.8
P49321;P49321-3	P49321;P49321-2;P49321-3;P49321-4	NASP_HUMAN	NASP	Nuclear autoantigenic sperm protein	902.547	2306.16	1625.83	1737.59	1588.4	1782.7
P49327	P49327	FAS_HUMAN	FASN	Fatty acid synthase	425307	463225	470349	459390	422014	461318
P49336;P49336-2	P49336;Q9BWU1;P49336-2	CDK8_HUMAN	CDK8	Cyclin-dependent kinase 8	3892.42	2862.82	3527.03	3074.57	3952.04	3719.54
P49354;P49354-2	P49354;P49354-2	FNTA_HUMAN	FNTA	Protein farnesyltransferase/geranylgeranyltransferase type-1 subunit alpha	2492.26	2071.4	2649.7	2358.5	1705.43	2012.23
P49356	P49356;P49356-2	FNTB_HUMAN	FNTB	Protein farnesyltransferase subunit beta	16357.4	16726.4	13322.6	16450.9	17470.8	14499.7
P49366	P49366;P49366-3	DHYS_HUMAN	DHPS	Deoxyhypusine synthase	784.152	804.163	1631	1629.13	984.55	1879.1
P49368	P49368;P49368-2	TCPG_HUMAN	CCT3	T-complex protein 1 subunit gamma	173093	183351	184707	184026	184156	185211
P49406	P49406	RM19_HUMAN	MRPL19	Large ribosomal subunit protein bL19m	69091.7	63770.8	60525.7	65467.3	68344.9	62870.8
P49411	P49411	EFTU_HUMAN	TUFM	Elongation factor Tu, mitochondrial	739538	778882	736227	798161	833853	681234
P49419-2	P49419;P49419-2;P49419-4	AL7A1_HUMAN	ALDH7A1	Isoform 2 of Alpha-aminoadipic semialdehyde dehydrogenase	106372	93484	99256.8	104567	108360	112020
P49427	P49427	UB2R1_HUMAN	CDC34	Ubiquitin-conjugating enzyme E2 R1	1896.3		1794.08	1649.96		1011.58
P49454	P49454	CENPF_HUMAN	CENPF	Centromere protein F	19491.8	16309.1	16758.3	17618.3	20233	20999.8
P49458	P49458	SRP09_HUMAN	SRP9	Signal recognition particle 9 kDa protein	55001	58116	48140.1	44709.9	45101.9	44659.6
P49585	P49585;Q9Y5K3;Q9Y5K3-2;Q9Y5K3-3;Q9Y5K3-4	PCY1A_HUMAN	PCYT1A	Choline-phosphate cytidylyltransferase A	9661.22	8404.8	9634.6	8785.71	10322.4	10820.9
P49588	P49588;P49588-2	SYAC_HUMAN	AARS1	Alanine--tRNA ligase, cytoplasmic	18764.5	17962.5	18710.6	20075.2	21215.6	21127.8
P49589-3	P49589;P49589-2;P49589-3	SYCC_HUMAN	CARS1	Isoform 3 of Cysteine--tRNA ligase, cytoplasmic	13637.8	22174.3	14034.7	16684.3	11267.6	15431.8
P49591	P49591	SYSC_HUMAN	SARS1	Serine--tRNA ligase, cytoplasmic	26712.3	25719.5	25955	24837.5	24323.1	23519.8
P49642	P49642	PRI1_HUMAN	PRIM1	DNA primase small subunit	22281.3	22717.5	23474.5	23361	24109.7	26999.3
P49643	P49643;P49643-2	PRI2_HUMAN	PRIM2	DNA primase large subunit	22338.2	22254	21239.7	22812	22777.2	20804.4
P49674	P48730;P48730-2;P49674	KC1E_HUMAN	CSNK1E	Casein kinase I isoform epsilon	25776.9	26832.4	28117.4	34341.8	28352.6	30469.6
P49720	P49720	PSB3_HUMAN	PSMB3	Proteasome subunit beta type-3	10898.4	10205	8814.57	8478.37	7875.46	8075.46
P49721	P49721	PSB2_HUMAN	PSMB2	Proteasome subunit beta type-2	51815.2	62326.8	59665	53125.1	48758.9	49777.1
P49736	P49736	MCM2_HUMAN	MCM2	DNA replication licensing factor MCM2	28371.1	31193.3	28508.6	31777.8	25824	36229.2
P49747;P49747-2	P49747;P49747-2	COMP_HUMAN	COMP	Cartilage oligomeric matrix protein	1182.88	1464.7	1494.53	1403.42	1045.37	858.133
P49748;P49748-3	P49748;P49748-2;P49748-3	ACADV_HUMAN	ACADVL	Very long-chain specific acyl-CoA dehydrogenase, mitochondrial		1745.26	2298.26	2362.98	1130.5	2358.08
P49754;P49754-2;P49754-3	P49754;P49754-2;P49754-3	VPS41_HUMAN	VPS41	Vacuolar protein sorting-associated protein 41 homolog	4227.25	4600.8	5290.65	3675.97	4647.79	3787.94
P49755	P49755	TMEDA_HUMAN	TMED10	Transmembrane emp24 domain-containing protein 10	16583.5	14781.9	15835.1	14984.2	18336.3	17193.7
P49756	P49756;P49756-2;P49756-3	RBM25_HUMAN	RBM25	RNA-binding protein 25	26725.6	33224.3	27960.8	26325.5	28157.4	32538
P49757;P49757-3	P49757;P49757-3;P49757-8;P49757-2;P49757-4;P49757-5;P49757-6;P49757-7	NUMB_HUMAN	NUMB	Protein numb homolog	28892.3	24935.8	28820.6	28871.3	32116.8	29689.7
P49770	P49770	EI2BB_HUMAN	EIF2B2	Translation initiation factor eIF-2B subunit beta	8321.05	8666.34	10126.3	9570.43	8704.48	10304.3
P49773	P49773	HINT1_HUMAN	HINT1	Adenosine 5'-monophosphoramidase HINT1	3178.66	3101.71	3592.8	3623.58	3873.41	3433.6
P49790;P49790-2	P49790;P49790-2;P49790-3	NU153_HUMAN	NUP153	Nuclear pore complex protein Nup153	10180.4	9805.29	10183.3	9843.34	10422.2	10842.3
P49792	P49792	RBP2_HUMAN	RANBP2	E3 SUMO-protein ligase RanBP2	87576.5	82742.3	85864.5	88735.1	92737.9	90969.5
P49815;P49815-2;P49815-3;P49815-4;P49815-5	P49815;P49815-2;P49815-3;P49815-4;P49815-5;P49815-6;P49815-7	TSC2_HUMAN	TSC2	Tuberin	15986.1	16677	15127	14528	13895.8	14203.1
P49821;P49821-2	P49821;P49821-2	NDUV1_HUMAN	NDUFV1	NADH dehydrogenase [ubiquinone] flavoprotein 1, mitochondrial	8545.44	13054.4	9368.9	9658.22	8870.73	9479.91
P49840	P49840	GSK3A_HUMAN	GSK3A	Glycogen synthase kinase-3 alpha	9605.83	8859.99	9731.86	7976.22	7670.94	9796.92
P49841	P49841;P49841-2	GSK3B_HUMAN	GSK3B	Glycogen synthase kinase-3 beta	16470.4	16223.4	18076	17310.1	17615.6	19857.7
P49842;P49842-1;P49842-2;P49842-3	P49842;P49842-1;P49842-2;P49842-3	STK19_HUMAN	STK19	Inactive serine/threonine-protein kinase 19	4780.71	4885.36	4395.18	4481.37	3285.29	4407.84
P49848;P49848-3	P49848;P49848-4;P49848-2;P49848-3	TAF6_HUMAN	TAF6	Transcription initiation factor TFIID subunit 6	11368.9	13511.7	11386.5	10684.7	12262.9	10540
P49902;P49902-2	P49902;P49902-2	5NTC_HUMAN	NT5C2	Cytosolic purine 5'-nucleotidase	1090.9	1447.58	1378.2	1289.32	1057.12	1466.29
P49903;P49903-4	P49903;P49903-3;P49903-4	SPS1_HUMAN	SEPHS1	Selenide, water dikinase 1	1984.34	1553.19	1806.57	1211.85	2180.56	1943.05
P49914;P49914-2	P49914;P49914-2	MTHFS_HUMAN	MTHFS	5-formyltetrahydrofolate cyclo-ligase	17034.8	17776	19475.3	14320.4	16978.6	18950
P49915	P49915;P49915-2	GUAA_HUMAN	GMPS	GMP synthase [glutamine-hydrolyzing]	101297	101797	95840.9	92691.9	98486.8	101815
P49916;P49916-3	P49916;P49916-2;P49916-3;P49916-4	DNLI3_HUMAN	LIG3	DNA ligase 3	6965.51	4746.11	5879.11	6563.09	6728.22	6417.63
P49959;P49959-3	P49959;P49959-2;P49959-3	MRE11_HUMAN	MRE11	Double-strand break repair protein MRE11	32444.4	31385.3	33262.5	29414.7	32472.9	30759.5
P50148	P50148	GNAQ_HUMAN	GNAQ	Guanine nucleotide-binding protein G(q) subunit alpha	13432.9	16147.3	13543	13163.1	13536.8	14128.5
P50213	P50213	IDH3A_HUMAN	IDH3A	Isocitrate dehydrogenase [NAD] subunit alpha, mitochondrial	242382	223852	228659	236436	245575	233956
P50219	P50219;P50219-2	MNX1_HUMAN	MNX1	Motor neuron and pancreas homeobox protein 1	5713.55	4511.15	5698.02	5324.42	4394.32	4938.85
P50336	P50336	PPOX_HUMAN	PPOX	Protoporphyrinogen oxidase	8690.89	10558.4	8851.05	8623.42	9445.67	9960.8
P50395	P50395	GDIB_HUMAN	GDI2	Rab GDP dissociation inhibitor beta	32269	43468.7	36093.1	35673.5	29997.7	32990.5
P50402	P50402	EMD_HUMAN	EMD	Emerin	11097.1	9753.86	9491.96	7846.09	10238.3	11698.9
P50416	P50416;P50416-2	CPT1A_HUMAN	CPT1A	Carnitine O-palmitoyltransferase 1, liver isoform	11071.4	12391.7	11275.3	10565.1	11874.6	11052.6
P50453	P50453	SPB9_HUMAN	SERPINB9	Serpin B9	11378.2	17880.7	12778.2	15549.8	13678.4	15302.9
P50454	P50454	SERPH_HUMAN	SERPINH1	Serpin H1	185978	187699	174148	210527	201731	174789
P50542;P50542-3;P50542-4	P50542;P50542-3;P50542-2;P50542-4	PEX5_HUMAN	PEX5	Peroxisomal targeting signal 1 receptor	17592.8	10449.3	12850.1	12199	12959.6	13996.3
P50548;P50548-2	P50548;P50548-2	ERF_HUMAN	ERF	ETS domain-containing transcription factor ERF	5539.4	5499.43	4799.96	3008.92	4781.9	5225.57
P50552	P50552	VASP_HUMAN	VASP	Vasodilator-stimulated phosphoprotein	2749.85	3048.2	2784.47	2601.08	4409.99	3057.02
P50570-2	P50570-2;P50570-3	DYN2_HUMAN	DNM2	Isoform 2 of Dynamin-2						976.777
P50570-4	P50570;P50570-2;Q9UQ16;P50570-3;P50570-4;P50570-5;Q9UQ16-2;Q9UQ16-3;Q9UQ16-4	DYN2_HUMAN	DNM2	Isoform 4 of Dynamin-2	183438	156165	180524	200788	194416	183477
P50570-5	P50570;P50570-2;P50570-5	DYN2_HUMAN	DNM2	Isoform 5 of Dynamin-2	13553.8	12800.3	12923.6	16043	16817.4	13044.6
P50579;P50579-2	P50579;P50579-2;P50579-3	MAP2_HUMAN	METAP2	Methionine aminopeptidase 2	42085.3	50041.4	50014.6	44616.4	49599.3	50454.2
P50613	P50613	CDK7_HUMAN	CDK7	Cyclin-dependent kinase 7	6589.56	6185.34	7319.45	8421.17	5944.79	8850.57
P50747;P50747-2	P50747;P50747-2	BPL1_HUMAN	HLCS	Biotin--protein ligase			2333.84	1401.57
P50748	P50748	KNTC1_HUMAN	KNTC1	Kinetochore-associated protein 1	19655.2	23762.5	20010.8	19907.1	17935.7	17963.8
P50749	P50749	RASF2_HUMAN	RASSF2	Ras association domain-containing protein 2	12019.2	8740.25	10746.7	9869.38	11675.8	10069.9
P50750;P50750-2	P50750;P50750-2	CDK9_HUMAN	CDK9	Cyclin-dependent kinase 9	36641.1	37660.5	41687.6	44080.1	38560.5	42258.2
P50851-2	P50851;P50851-2	LRBA_HUMAN	LRBA	Isoform 2 of Lipopolysaccharide-responsive and beige-like anchor protein	71471.1	70079.5	70991.3	72618	68868.4	69229.6
P50897	P50897;P50897-2	PPT1_HUMAN	PPT1	Palmitoyl-protein thioesterase 1	392716	362334	394014	365139	356802	336259
P50914	P50914	RL14_HUMAN	RPL14	Large ribosomal subunit protein eL14	166333	169665	214875	142600	126714	183229
P50990	P50990;P50990-2;P50990-3	TCPQ_HUMAN	CCT8	T-complex protein 1 subunit theta	236414	256621	253830	241243	221001	251884
P50991	P50991;P50991-2	TCPD_HUMAN	CCT4	T-complex protein 1 subunit delta	402280	442371	465679	380628	429455	339186
P51114	P51114;P51114-2;P51114-3	FXR1_HUMAN	FXR1	RNA-binding protein FXR1	251396	246487	254576	284934	281875	283207
P51116	P51116	FXR2_HUMAN	FXR2	RNA-binding protein FXR2	38562.1	40435.6	42764.7	45618.9	42811	38642.2
P51148;P51148-2	P20339;P51148;P61020;P51148-2;P20339-2;P61020-2	RAB5C_HUMAN	RAB5C	Ras-related protein Rab-5C	117289	114276	110231	125326	127375	115360
P51149	P51149	RAB7A_HUMAN	RAB7A	Ras-related protein Rab-7a	35413.8	33317.2	30906.8	32910	35489.9	32232.7
P51151	P51151	RAB9A_HUMAN	RAB9A	Ras-related protein Rab-9A	4759.02	4067.85	4155.5	4053.61	5262.82	6389.18
P51153	P51153	RAB13_HUMAN	RAB13	Ras-related protein Rab-13	25911.7	27218.3	25848.5	25150.4	25350	27263
P51157	P51157;P51157-2;P51157-3	RAB28_HUMAN	RAB28	Ras-related protein Rab-28	5416.32	5769.73	5770.63	4999.51	5597.95	5923.64
P51159	P51159	RB27A_HUMAN	RAB27A	Ras-related protein Rab-27A		1069.68	809.548
P51178;P51178-2	P51178;P51178-2	PLCD1_HUMAN	PLCD1	1-phosphatidylinositol 4,5-bisphosphate phosphodiesterase delta-1	7967.57	9756.65	7824.67	9366.89	7544.23	7339.9
P51398;P51398-2;P51398-3	P51398;P51398-2;P51398-3	RT29_HUMAN	DAP3	Small ribosomal subunit protein mS29	13575.1	13664.2	14335.7	14273.8	14414.9	15588.1
P51452	P51452;P51452-2	DUS3_HUMAN	DUSP3	Dual specificity protein phosphatase 3	4277.51	4127.93	4897.09	5230.55	4187.48	4440.77
P51513;P51513-5	P51513;P51513-2;P51513-5	NOVA1_HUMAN	NOVA1	RNA-binding protein Nova-1		2221.82			4303.29	3147.26
P51530;P51530-4	P51530;P51530-2;P51530-3;P51530-4	DNA2_HUMAN	DNA2	DNA replication ATP-dependent helicase/nuclease DNA2	6412.55	5555.91	5978.96	5723.96	6817.6	6442.01
P51532;P51532-2;P51532-3;P51532-4;P51532-5	P51531;P51532;P51531-2;P51532-2;P51532-3;P51532-4;P51532-5	SMCA4_HUMAN	SMARCA4	Transcription activator BRG1	33601.5	28698.3	32483.6	34330.3	33546.9	35831.6
P51553;P51553-2	P51553;P51553-2	IDH3G_HUMAN	IDH3G	Isocitrate dehydrogenase [NAD] subunit gamma, mitochondrial	43946.3	51035	47976.8	43581.5	49588.9	38274.4
P51570	P51570	GALK1_HUMAN	GALK1	Galactokinase	10819.3	10443.6	10041.1	9913.83	13355.1	12089.4
P51571	P51571	SSRD_HUMAN	SSR4	Translocon-associated protein subunit delta	20467.6	23623.7	18539.5	18175.9	15856.1	15667.4
P51587	P51587	BRCA2_HUMAN	BRCA2	Breast cancer type 2 susceptibility protein	4883.75	4076.33	4636.23	4783.34	5176.01	4938.63
P51610-4	P51610;P51610-2;P51610-3;P51610-4	HCFC1_HUMAN	HCFC1	Isoform 4 of Host cell factor 1	165165	161780	163672	176632	181001	160499
P51617;P51617-2;P51617-3	P51617;P51617-2;P51617-3;P51617-4	IRAK1_HUMAN	IRAK1	Interleukin-1 receptor-associated kinase 1	10419.9	8464.74	8918.98	8314.41	10687.9	10061.3
P51648;P51648-2	P51648;P51648-2	AL3A2_HUMAN	ALDH3A2	Aldehyde dehydrogenase family 3 member A2	14110.7	12904.4	14022.9	14443.5	15111.7	15178.7
P51649;P51649-2	P51649;P51649-2	SSDH_HUMAN	ALDH5A1	Succinate-semialdehyde dehydrogenase, mitochondrial	1642.92	2479.07	854.872	1137.65	1744.06
P51654;P51654-3	P51654;P51654-2;P51654-3	GPC3_HUMAN	GPC3	Glypican-3	12852.9	10731.9	8308.47	11716.7	9461.52	10858.8
P51659	P51659	DHB4_HUMAN	HSD17B4	Peroxisomal multifunctional enzyme type 2	145175	137646	140295	147865	157680	152723
P51665	P51665	PSMD7_HUMAN	PSMD7	26S proteasome non-ATPase regulatory subunit 7	23383.4	19473.4	20709.4	20935.3	21414.4	25411.6
P51668;Q9Y2X8	P51668;Q9Y2X8	UB2D1_HUMAN;UB2D4_HUMAN	UBE2D1;UBE2D4	Ubiquitin-conjugating enzyme E2 D1	11924	9535.3	6227.78	10396.7	11916.1	7318.52
P51688	P51688	SPHM_HUMAN	SGSH	N-sulphoglucosamine sulphohydrolase	3489.82	5443.47	4153.46	4218.18	3497.22	4373.64
P51692	P51692	STA5B_HUMAN	STAT5B	Signal transducer and activator of transcription 5B	13361.5	12970.9	14687.8	12848.8	13192	14260.4
P51784	P51784	UBP11_HUMAN	USP11	Ubiquitin carboxyl-terminal hydrolase 11	13882.1	13012.6	15188.4	108886	109343	82689.8
P51786	P51786	ZN157_HUMAN	ZNF157	Zinc finger protein 157	9276.46		2338.19	2852.45	9344.37	10027.3
P51809-2	P51809;P51809-2;P51809-3	VAMP7_HUMAN	VAMP7	Isoform 2 of Vesicle-associated membrane protein 7	5700.1	5147.07	6601.33	4689.62	4807.7	4951.61
P51812	P51812	KS6A3_HUMAN	RPS6KA3	Ribosomal protein S6 kinase alpha-3	76037.2	81742.8	92516.2	88388	83096.1	82602.7
P51817	P51817;O43930	PRKX_HUMAN	PRKX	cAMP-dependent protein kinase catalytic subunit PRKX		4788.96	3800.6	7172.54	2995.47	10036.1
P51854	P51854;P51854-4;P51854-1	TKTL1_HUMAN	TKTL1	Transketolase-like protein 1	37409.3	41254.1	41215.8	40411	35817.5	38725.8
P51884	P51884	LUM_HUMAN	LUM	Lumican	24265.8	24820.5	26749.6	27279.2	22102.3	21364.5
P51946	P51946	CCNH_HUMAN	CCNH	Cyclin-H	14680.6	14615	18466.9	14286.3	14442.7	14372.2
P51948	P51948;P51948-2	MAT1_HUMAN	MNAT1	CDK-activating kinase assembly factor MAT1	10393.2	10939	12582.3	8694.02	9461.26	13136.1
P51956;P51956-2	P51956;P51956-2	NEK3_HUMAN	NEK3	Serine/threonine-protein kinase Nek3	7079.24	6803.53	5552.02	6733.24	7176.94	6664.09
P51957;P51957-2	P51957;P51957-2;P51957-3	NEK4_HUMAN	NEK4	Serine/threonine-protein kinase Nek4	2137.58	3050.64	3158.47	2560.83	3075.63	3165.81
P51965;P51965-2	P51965;P51965-2	UB2E1_HUMAN	UBE2E1	Ubiquitin-conjugating enzyme E2 E1	15647.6	16757.8	18174.2	16067.1	11286.8	14270.8
P51970	P51970	NDUA8_HUMAN	NDUFA8	NADH dehydrogenase [ubiquinone] 1 alpha subcomplex subunit 8	30019.1	22650.9	24142.9	26183.2	25251.8	26747.4
P51991	P51991;P51991-2	ROA3_HUMAN	HNRNPA3	Heterogeneous nuclear ribonucleoprotein A3	42338.7	45821.3	36407.2	34617.7	37053	37389.5
P52209;P52209-2	P52209;P52209-2	6PGD_HUMAN	PGD	6-phosphogluconate dehydrogenase, decarboxylating	10603.2	13083.5	11702.7	11448.7	10004.7	10201.1
P52272;P52272-2	P52272;P52272-2	HNRPM_HUMAN	HNRNPM	Heterogeneous nuclear ribonucleoprotein M	351120	353690	412125	413504	424819	426093
P52292	P52292	IMA1_HUMAN	KPNA2	Importin subunit alpha-1	292487	292279	299579	350559	338592	376249
P52294	P52294	IMA5_HUMAN	KPNA1	Importin subunit alpha-5	10984.7	11072.7	12975.4	13290.1	11247	11071.1
P52298	P52298;P52298-2	NCBP2_HUMAN	NCBP2	Nuclear cap-binding protein subunit 2	6344.92	7466.35	6851.61	3702.33		8060.32
P52306;P52306-5	P52306;P52306-5;P52306-2;P52306-3;P52306-4;P52306-6	GDS1_HUMAN	RAP1GDS1	Rap1 GTPase-GDP dissociation stimulator 1	9742.1	9540.57	10535.2	8343.31	9841.16	10607.8
P52429	P52429	DGKE_HUMAN	DGKE	Diacylglycerol kinase epsilon	1380.28		1746.81	2415.52	2781.06	1875.96
P52434	P52434;P52434-3	RPAB3_HUMAN	POLR2H	DNA-directed RNA polymerases I, II, and III subunit RPABC3	13616.4	12822.5	12050.6	12115.1	11580.7	8451.18
P52564	P52564;P52564-2	MP2K6_HUMAN	MAP2K6	Dual specificity mitogen-activated protein kinase kinase 6	15621.8	15608.7	16259.5	15990.7	14963.2	14971.9
P52565	P52565;P52565-2	GDIR1_HUMAN	ARHGDIA	Rho GDP-dissociation inhibitor 1	28198.7	30713.2	26046.5	27542.7	23893.1	29649.1
P52594;P52594-2;P52594-3;P52594-4	P52594;P52594-2;P52594-3;P52594-4	AGFG1_HUMAN	AGFG1	Arf-GAP domain and FG repeat-containing protein 1	8512.67	11357.8	9129.69	7768.43	8548.13	10717.3
P52597	P52597	HNRPF_HUMAN	HNRNPF	Heterogeneous nuclear ribonucleoprotein F	23402.3	23895.1	23816.5	20443.1	21737.8	24288.5
P52630	P52630;P52630-4	STAT2_HUMAN	STAT2	Signal transducer and activator of transcription 2	39570	40250.7	43094.1	39571.5	39191.6	40792.9
P52630-4	P52630-4	STAT2_HUMAN	STAT2	Isoform 2 of Signal transducer and activator of transcription 2		442.272
P52701	P52701;P52701-2;P52701-3;P52701-4	MSH6_HUMAN	MSH6	DNA mismatch repair protein Msh6	109072	116078	108429	107855	101290	107022
P52732	P52732	KIF11_HUMAN	KIF11	Kinesin-like protein KIF11	87345.1	92323.7	87063.6	92733	90745	85222.9
P52735;P52735-2;P52735-3	P52735;P52735-2;P52735-3	VAV2_HUMAN	VAV2	Guanine nucleotide exchange factor VAV2	3470.99	5011.04	5723.22	5487.35	4156.3	5155.95
P52739;P52739-2	P52739;P52739-2	ZN131_HUMAN	ZNF131	Zinc finger protein 131	3759.07	2983.73	3176.91	2913.56	2685.87	3121.78
P52747;P52747-2	P52747;P52747-2;P52747-3	ZN143_HUMAN	ZNF143	Zinc finger protein 143	7600.96	6661.98	7643.78	7310.93	9466.16	7585.06
P52756	P52756	RBM5_HUMAN	RBM5	RNA-binding protein 5	10898.4	11146.5	10442.8	10284.7	10910.7	12518.7
P52789	P52789	HXK2_HUMAN	HK2	Hexokinase-2	31126.1	31698.9	30525.7	33047.2	35420.7	30835.8
P52815	P52815	RM12_HUMAN	MRPL12	Large ribosomal subunit protein bL12m						3516.64
P52888	P52888;P52888-2	THOP1_HUMAN	THOP1	Thimet oligopeptidase	4111.75	5779.41	3587.38	3430.85	2993.6	5754.67
P52907	P52907	CAZA1_HUMAN	CAPZA1	F-actin-capping protein subunit alpha-1	42316.4	50301.8	38694.8	42874.5	40654.2	44079.1
P52948;P52948-5	P52948;P52948-2;P52948-3;P52948-4;P52948-5;P52948-6	NUP98_HUMAN	NUP98	Nuclear pore complex protein Nup98-Nup96	27263.5	24272.5	25248.5	26636.7	29395.8	28017.2
P53004	P53004	BIEA_HUMAN	BLVRA	Biliverdin reductase A	18475.3	24139.3	18939	19457.3	19487.1	20232.9
P53007	P53007	TXTP_HUMAN	SLC25A1	Tricarboxylate transport protein, mitochondrial	9064.88	11248.8	8746.57	9256.21	7296.92	9700.09
P53041	P53041	PPP5_HUMAN	PPP5C	Serine/threonine-protein phosphatase 5						2964.09
P53350	P53350	PLK1_HUMAN	PLK1	Serine/threonine-protein kinase PLK1	36636.1	37329.9	40831.4	43682.4	38197	44523.1
P53355;P53355-3	P53355;P53355-2;P53355-3;P53355-4	DAPK1_HUMAN	DAPK1	Death-associated protein kinase 1	1175.68	1564.51	1459.82	1435.14		1651.51
P53365	P53365;P53365-2;P53365-3	ARFP2_HUMAN	ARFIP2	Arfaptin-2	26282.8	27223.4	29183.2	31404.6	31749.1	26453.6
P53367	P53367;P53367-2;P53367-3	ARFP1_HUMAN	ARFIP1	Arfaptin-1	36673.1	33874.9	31725.7	33511.5	34331.6	36594.6
P53367-2	P53367-2	ARFP1_HUMAN	ARFIP1	Isoform A of Arfaptin-1	16294.6	12256.3	15355.7	14502.6	15671.9	14467.2
P53384;P53384-2	P53384;P53384-2	NUBP1_HUMAN	NUBP1	Cytosolic Fe-S cluster assembly factor NUBP1	8998.69	10138.8	12347.3	9747.93	5876.56	11257.6
P53396	P53396;P53396-2	ACLY_HUMAN	ACLY	ATP-citrate synthase	40768.3	41027.3	40212.9	43527.5	39696	44837.7
P53582	P53582	MAP11_HUMAN	METAP1	Methionine aminopeptidase 1	14714.1	17336.4	13866.8	13083.9	14564.5	13632.2
P53597	P53597	SUCA_HUMAN	SUCLG1	Succinate--CoA ligase [ADP/GDP-forming] subunit alpha, mitochondrial	80246.3	81318	89835.3	83874.7	89056	84617.2
P53602	P53602	MVD1_HUMAN	MVD	Diphosphomevalonate decarboxylase	13392	14752	10534.6	12873.1	12411.3	12260.1
P53618	P53618	COPB_HUMAN	COPB1	Coatomer subunit beta	162540	174450	165751	162043	148031	157567
P53621	P53621;P53621-2	COPA_HUMAN	COPA	Coatomer subunit alpha	229039	240725	242537	238695	225576	239159
P53634	P53634	CATC_HUMAN	CTSC	Dipeptidyl peptidase 1	8359.12	8261.09	8468.74	8477.47	7388.11	9389.41
P53667;P53667-2;P53667-4	P53667;P53667-2;P53667-4	LIMK1_HUMAN	LIMK1	LIM domain kinase 1	2969.51	3082.53	2923.71	2437.77	1917.67	4348.48
P53671;P53671-2;P53671-3	P53671;P53671-2;P53671-3	LIMK2_HUMAN	LIMK2	LIM domain kinase 2	6424.27	6025.98	6514.47	6519.03	7308.77	7940.84
P53677	P53677;P53677-2	AP3M2_HUMAN	AP3M2	AP-3 complex subunit mu-2	3647.51	4949.98	4728.4	5601.19	3953.08	6180.91
P53680	P53680;P53680-2	AP2S1_HUMAN	AP2S1	AP-2 complex subunit sigma	36717.1	41738.5	37858.2	41805.3	36487.6	39188.3
P53805;P53805-2;P53805-3	P53805;P53805-2;P53805-3	RCAN1_HUMAN	RCAN1	Calcipressin-1		3950.38	5406.63		6498.78	2946.17
P53985;P53985-2	P53985;P53985-2	MOT1_HUMAN	SLC16A1	Monocarboxylate transporter 1	11090.4	12109.2	11056.7	11769.4	14263.7	9568.55
P53990;P53990-2;P53990-4;P53990-5	P53990;P53990-3;P53990-2;P53990-4;P53990-5	IST1_HUMAN	IST1	IST1 homolog	28712.3	28288.8	29809.9	22152.6	23084.4	26640.2
P53992	P53992	SC24C_HUMAN	SEC24C	Protein transport protein Sec24C	63922.6	65218.6	71887.3	67515.4	62753.9	74273.3
P53999	P53999	TCP4_HUMAN	SUB1	Activated RNA polymerase II transcriptional coactivator p15	14557.9	18375.3	13410.7	14919.9	16231.4	13860.1
P54098	P54098	DPOG1_HUMAN	POLG	DNA polymerase subunit gamma-1	8471.61	9453.24	9484.88	8553.3	8499.32	9711.94
P54105	P54105	ICLN_HUMAN	CLNS1A	Methylosome subunit pICln	11154.5	9419.59	8970.77		9921.4	11294.6
P54132	P54132	BLM_HUMAN	BLM	RecQ-like DNA helicase BLM	6350.52	5404.8	5240.41	6077.53	5945.33	5693.94
P54136	P54136;P54136-2	SYRC_HUMAN	RARS1	Arginine--tRNA ligase, cytoplasmic	71487.9	75271.5	85767.4	82589.8	83459	90052.8
P54252;P54252-1;P54252-4	P54252;P54252-1;P54252-3;P54252-4;P54252-5	ATX3_HUMAN	ATXN3	Ataxin-3	6517.42	6186.25	7310.63	7311.54	7781.21	6230.13
P54277;P54277-3	P54277;P54277-2;P54277-3;P54277-4	PMS1_HUMAN	PMS1	PMS1 protein homolog 1	16445.9	16189.5	16947.4	16346	14592.3	14907.9
P54278	P54278	PMS2_HUMAN	PMS2	Mismatch repair endonuclease PMS2	13360.6	11343.7	12271.1	11125.9	10981.7	11563.2
P54284;P54284-2;P54284-3;P54284-4;P54284-5	P54284;P54284-2;P54284-3;P54284-4;P54284-5	CACB3_HUMAN	CACNB3	Voltage-dependent L-type calcium channel subunit beta-3			1722.63	767.802		1133.77
P54577	P54577	SYYC_HUMAN	YARS1	Tyrosine--tRNA ligase, cytoplasmic	291097	301440	317371	320856	308695	300461
P54578	P54578;P54578-2;P54578-3	UBP14_HUMAN	USP14	Ubiquitin carboxyl-terminal hydrolase 14	37581.7	40276.9	40190.4	797441	906489	602290
P54619;P54619-2	P54619;Q9UGJ0;Q9UGJ0-3;P54619-2;P54619-3;Q9UGJ0-2	AAKG1_HUMAN	PRKAG1	5'-AMP-activated protein kinase subunit gamma-1	59921.4	55560.3	61715.6	60985.8	56257.1	48560.3
P54646	P54646	AAPK2_HUMAN	PRKAA2	5'-AMP-activated protein kinase catalytic subunit alpha-2	28746.9	25364.6	26472.1	29038.7	25012.3	30723.8
P54687;P54687-2;P54687-3;P54687-4;P54687-5	P54687;P54687-4;P54687-2;P54687-3;P54687-5	BCAT1_HUMAN	BCAT1	Branched-chain-amino-acid aminotransferase, cytosolic	1997.14	4078.98	2804.72	2779.6	2719.68	2963.12
P54709	P54709	AT1B3_HUMAN	ATP1B3	Sodium/potassium-transporting ATPase subunit beta-3	6734.57	6270.01	5348.92	5733.4	5629.86	5496.93
P54819;P54819-2	P54819;P54819-2;P54819-3;P54819-4;P54819-5;P54819-6	KAD2_HUMAN	AK2	Adenylate kinase 2, mitochondrial	17883.2	17260.6	19420.2	17551.8	17676.9	24911.2
P54886;P54886-2	P54886;P54886-2	P5CS_HUMAN	ALDH18A1	Delta-1-pyrroline-5-carboxylate synthase	880146	827364	867859	882602	891966	875771
P54920	P54920	SNAA_HUMAN	NAPA	Alpha-soluble NSF attachment protein	150289	141893	163093	146823	138694	152490
P55010	P55010	IF5_HUMAN	EIF5	Eukaryotic translation initiation factor 5	11836.7	10799	12517.5	15835.4	11194.8	11680.7
P55036	P55036;P55036-2	PSMD4_HUMAN	PSMD4	26S proteasome non-ATPase regulatory subunit 4	25043	18176.3	23967.2	20053.5	21158	21210.2
P55039	P55039	DRG2_HUMAN	DRG2	Developmentally-regulated GTP-binding protein 2	43171.3	53926.1	51123	43877.7	48115.2	48438.8
P55058	P55058;P55058-2;P55058-3;P55058-4	PLTP_HUMAN	PLTP	Phospholipid transfer protein	32387.6	36370.1	34481.3	32436.2	31469.8	35819.4
P55060;P55060-3	P55060;P55060-3;P55060-4	XPO2_HUMAN	CSE1L	Exportin-2	495042	572359	614399	547012	482759	485995
P55072	P55072	TERA_HUMAN	VCP	Transitional endoplasmic reticulum ATPase	26238.5	33402.2	28357.3	26220.5	22777.8	24784.5
P55084;P55084-2	P55084;P55084-2	ECHB_HUMAN	HADHB	Trifunctional enzyme subunit beta, mitochondrial	46137.6	49432.4	46529.1	46427.4	43143.5	41331.1
P55145	P55145	MANF_HUMAN	MANF	Mesencephalic astrocyte-derived neurotrophic factor	12783.1	14974.4	12505.4	32595.3	10960.7	10935.2
P55196;P55196-5	P55196;P55196-1;P55196-2;P55196-3;P55196-5;P55196-6	AFAD_HUMAN	AFDN	Afadin	9948.84	8933.58	8761.98	8501.74	7252.35	8344
P55199	P55199	ELL_HUMAN	ELL	RNA polymerase II elongation factor ELL	5342.84	4127.72	5579.97	5262.6	6871.33	4642.74
P55209-3	P55209;P55209-2;P55209-3	NP1L1_HUMAN	NAP1L1	Isoform 3 of Nucleosome assembly protein 1-like 1	16567.3	13012.7	17171.6	13688.9	14022.8	15313.4
P55209;P55209-2	P55209;P55209-2	NP1L1_HUMAN	NAP1L1	Nucleosome assembly protein 1-like 1	794.918		329.161	1483.33
P55210;P55210-3;P55210-4	P55210;P55210-3;P55210-4	CASP7_HUMAN	CASP7	Caspase-7	9464.98	8429.19	9547.9	8435.95	9941.6	12964.9
P55211	P55211;P55211-2;P55211-4	CASP9_HUMAN	CASP9	Caspase-9	2829.76	7416.43	5173.97	4981.16	3697.43	5202.29
P55212	P55212;P55212-2	CASP6_HUMAN	CASP6	Caspase-6	13202.7	18759.2	15752.9	19074.9	18740.6	18285
P55263;P55263-2;P55263-3;P55263-4	P55263;P55263-2;P55263-3;P55263-4	ADK_HUMAN	ADK	Adenosine kinase	3148.28	4063.54	2717.94	3642.94	2863.12	3247.16
P55265;P55265-4;P55265-5	P55265;P55265-2;P55265-3;P55265-4;P55265-5	DSRAD_HUMAN	ADAR	Double-stranded RNA-specific adenosine deaminase	30892.2	26955.9	28861.5	29625.5	29798.1	29993.3
P55268	P55268	LAMB2_HUMAN	LAMB2	Laminin subunit beta-2	9108.89	10176.7	11045.6	8355.53	10846.2	11148.2
P55285;P55285-2	P55285;P55285-2	CADH6_HUMAN	CDH6	Cadherin-6	7847.01	6857.53	7246.71	7183.49	6408.97	7292.93
P55347;P55347-2	P55347;P55347-2	PKNX1_HUMAN	PKNOX1	Homeobox protein PKNOX1	4896.63	4516.46	4900.53	5135.31	4903.81	4781.52
P55735;P55735-2;P55735-3;P55735-4	P55735;P55735-3;P55735-2;P55735-4	SEC13_HUMAN	SEC13	Protein SEC13 homolog	35024.1	39270.5	38966.7	38585.7	36992.7	32374.4
P55769	P55769	NH2L1_HUMAN	SNU13	NHP2-like protein 1	12013.8	9112.6	9505.47	8996.14	10564.4	11448.6
P55786	P55786;A6NEC2	PSA_HUMAN	NPEPPS	Puromycin-sensitive aminopeptidase	11722.3	11824.8	11836.5	10595.6	7505.7	10030.1
P55795	P55795	HNRH2_HUMAN	HNRNPH2	Heterogeneous nuclear ribonucleoprotein H2	42663.4	43955.8	50640.8	38026	42765.4	49496.7
P55809	P55809;Q9BYC2;P55809-2	SCOT1_HUMAN	OXCT1	Succinyl-CoA:3-ketoacid coenzyme A transferase 1, mitochondrial	7321.29	7949.44	6967.4	7952.23	5888.56	9210.57
P55884;P55884-2	P55884;P55884-2	EIF3B_HUMAN	EIF3B	Eukaryotic translation initiation factor 3 subunit B	95670.9	103518	102183	101942	92511.8	107030
P55957;P55957-2	P55957;P55957-2	BID_HUMAN	BID	BH3-interacting domain death agonist		687.001	832.404			315.301
P56134;P56134-2;P56134-3;P56134-4	P56134;P56134-2;P56134-3;P56134-4	ATPK_HUMAN	ATP5MF	ATP synthase subunit f, mitochondrial	42168.6	37193.9	28248.5	31077.6	33839.1	33063.7
P56179;P56179-2;P56179-3	P56179;P56179-2;P56179-3	DLX6_HUMAN	DLX6	Homeobox protein DLX-6	2934.07	3067.84	2392.67	3423.31		3510.57
P56182	P56182	RRP1_HUMAN	RRP1	Ribosomal RNA processing protein 1 homolog A	4035.6	3141.77	3392.77	3666.66	3253.32	4952.48
P56192	P56192;P56192-2	SYMC_HUMAN	MARS1	Methionine--tRNA ligase, cytoplasmic	85007.5	84701.7	99317.7	102802	96488.6	109408
P56282;P56282-2	P56282;P56282-2;P56282-3	DPOE2_HUMAN	POLE2	DNA polymerase epsilon subunit 2	15120.7	15845.4	14734.7	14395.6	15011.9	15333.9
P56377	P56377	AP1S2_HUMAN	AP1S2	AP-1 complex subunit sigma-2	13622.8	13307.5	12876.4	10994.8	11021	11947.1
P56385	P56385	ATP5I_HUMAN	ATP5ME	ATP synthase subunit e, mitochondrial	5619.97	7403.18	10347.2	4509.7	9985.79	8999.12
P56524	P56524;P56524-2	HDAC4_HUMAN	HDAC4	Histone deacetylase 4	12366.6	12788.9	11756.6	13582.2	17292.3	14224.1
P56537	P56537;P56537-2	IF6_HUMAN	EIF6	Eukaryotic translation initiation factor 6	24233.8	27972.4	25586.1	24640.1	22662.5	25009.2
P56545-3	P56545;P56545-3;Q13363;Q13363-2;P56545-2	CTBP2_HUMAN	CTBP2	Isoform 3 of C-terminal-binding protein 2	93956.3	101297	97236.7	89401.3	112407	103696
P56556	P56556	NDUA6_HUMAN	NDUFA6	NADH dehydrogenase [ubiquinone] 1 alpha subcomplex subunit 6	19957.2	16447.7	19960.9	19524.6	13777.6	17120.1
P56589	P56589	PEX3_HUMAN	PEX3	Peroxisomal biogenesis factor 3	841.18	370.035	582.97	942.441	516.617	922.779
P56817;P56817-2;P56817-3;P56817-4	P56817;P56817-2;P56817-3;P56817-4	BACE1_HUMAN	BACE1	Beta-secretase 1		3088.51		4508.26		3216.15
P56937;P56937-2;P56937-3	P56937;P56937-3;P56937-2	DHB7_HUMAN	HSD17B7	3-keto-steroid reductase/17-beta-hydroxysteroid dehydrogenase 7	9648.97	10943.1	7015.52	8457	11594.9	11048.2
P56945;P56945-2;P56945-3;P56945-5;P56945-6;P56945-7;P56945-8	P56945;P56945-2;P56945-3;P56945-4;P56945-5;P56945-6;P56945-7;P56945-8	BCAR1_HUMAN	BCAR1	Breast cancer anti-estrogen resistance protein 1	17275.5	13584.8	15466.6	7937.53	7400.27	7450.69
P56962	P56962	STX17_HUMAN	STX17	Syntaxin-17	24396.9	21215.4	23886.2	25828.9	24345.3	26980.2
P57060	P57060	RWD2B_HUMAN	RWDD2B	RWD domain-containing protein 2B	1877.21	1456.41	2487.79	1898.01	2168.91	2786.54
P57081;P57081-2	P57081;P57081-2	WDR4_HUMAN	WDR4	tRNA (guanine-N(7)-)-methyltransferase non-catalytic subunit WDR4	9181.54	8235.99	7586.08	7328.5	6228.26	7328.42
P57088	P57088	TMM33_HUMAN	TMEM33	Transmembrane protein 33	22750.4	27142.6	26420.8	23705.7	20550.5	17809.7
P57678	P57678	GEMI4_HUMAN	GEMIN4	Gem-associated protein 4	21453.7	24612.4	24931.5	23843.6	22507.7	22172.8
P57723;P57723-2	P57723;P57723-2	PCBP4_HUMAN	PCBP4	Poly(rC)-binding protein 4	20108	20715.8	22439.2	15944.5	21851.6	17524.5
P57729	O14966;P57729;Q13637	RAB38_HUMAN	RAB38	Ras-related protein Rab-38	11916.3	13938	14447.6	13942.6	13328.6	12359.6
P57737-3	P57737;P57737-2;P57737-3;P57737-4	CORO7_HUMAN	CORO7	Isoform 3 of Coronin-7	21526	20834.7	23425.7	24737.3	21947.8	25890.3
P57740	P57740;P57740-2;P57740-3	NU107_HUMAN	NUP107	Nuclear pore complex protein Nup107	73206	66396	66473.6	67896.1	72194.9	60225.3
P57772	P57772;P57772-2	SELB_HUMAN	EEFSEC	Selenocysteine-specific elongation factor	33578.5	35694	36417.3	33973.1	33057.4	35961.5
P58004	P58004;P58005;P58005-4	SESN2_HUMAN	SESN2	Sestrin-2	6422.71	5677.21	4987.6	5522.94	6505.84	5560.79
P58005	P58005;P58005-4	SESN3_HUMAN	SESN3	Sestrin-3	2457.03	2254.59	2397.97	2260.54	2056.29	2732.46
P58107	P58107	EPIPL_HUMAN	EPPK1	Epiplakin	206945	189007	198720	206229	203131	213598
P59190	P59190	RAB15_HUMAN	RAB15	Ras-related protein Rab-15	1343.57			677.311		686.591
P59665;P59666	P59665;P59666	DEF1_HUMAN;DEF3_HUMAN	DEFA1;DEFA3	Neutrophil defensin 1
P59780	P59780;Q7Z6K5-2	AP3S2_HUMAN	AP3S2	AP-3 complex subunit sigma-2	19502.4	13618.3	15312.6	14894.7	15967.2	18038.4
P59998;P59998-3	P59998;P59998-2;P59998-3	ARPC4_HUMAN	ARPC4	Actin-related protein 2/3 complex subunit 4	31853.2	54817.5	36319.6	39537	29648.4	31434.6
P60174;P60174-3	P60174;P60174-3;P60174-4	TPIS_HUMAN	TPI1	Triosephosphate isomerase	8348.87	9070.64	7146.45	8415.98	9070.63	8496.19
P60228	P60228	EIF3E_HUMAN	EIF3E	Eukaryotic translation initiation factor 3 subunit E	114148	111134	112110	110373	105339	112920
P60484;P60484-2	P60484;P60484-2;P60484-3	PTEN_HUMAN	PTEN	Phosphatidylinositol 3,4,5-trisphosphate 3-phosphatase and dual-specificity protein phosphatase PTEN	1472.54	2690.56	2209.82	2413.41	1772.24	1879.39
P60510	P60510	PP4C_HUMAN	PPP4C	Serine/threonine-protein phosphatase 4 catalytic subunit	10895.4	16238.5	16372.7	15875	13530.4	14192.4
P60660;P60660-2	P60660;P60660-2	MYL6_HUMAN	MYL6	Myosin light polypeptide 6	6343.8	8472.31	8433.23	7867	9154.64	6972.53
P60709;P63261	P60709;P63261	ACTB_HUMAN;ACTG_HUMAN	ACTB;ACTG1	Actin, cytoplasmic 1	3963440	4117940	3864040	4057880	4281180	3877400
P60763	P60763	RAC3_HUMAN	RAC3	Ras-related C3 botulinum toxin substrate 3		5556.04	5222.85	8969.1	10187.6	12396.2
P60842	P60842;P60842-2	IF4A1_HUMAN	EIF4A1	Eukaryotic initiation factor 4A-I	625577	713534	638322	642642	570130	638680
P60866;P60866-2	P60866;P60866-2	RS20_HUMAN	RPS20	Small ribosomal subunit protein uS10	112268	95887.6	106512	104175	119526	123927
P60891	P60891;P60891-2	PRPS1_HUMAN	PRPS1	Ribose-phosphate pyrophosphokinase 1	5371.55	7312.34	4832.76	5022.94	4903.53	4127.86
P60900	P60900;P60900-2;P60900-3	PSA6_HUMAN	PSMA6	Proteasome subunit alpha type-6	47717.8	52095.5	49711.5	49614.8	53427.1	46742
P60953	P60953	CDC42_HUMAN	CDC42	Cell division control protein 42 homolog	16217.3	16419.6	14035.7	15918	18737.7	15204.5
P60981;P60981-2	P60981;P60981-2	DEST_HUMAN	DSTN	Destrin	16499.7	20289.4	20530.1	21300.6	21959.9	21350
P61006	O95716;P20336;P20337;P51153;P61006;Q92930;Q96E17;P61006-2	RAB8A_HUMAN	RAB8A	Ras-related protein Rab-8A	43774.3	37231	38007.9	36604.8	43908.9	48023.5
P61009	P61009	SPCS3_HUMAN	SPCS3	Signal peptidase complex subunit 3	10814.3	13843.4	10027.1	12406.6	12290	12494.4
P61011	P61011;P61011-2	SRP54_HUMAN	SRP54	Signal recognition particle subunit SRP54	66304.5	61317	58830.4	69365.7	75466.6	64380.1
P61019	P61019;Q8WUD1	RAB2A_HUMAN	RAB2A	Ras-related protein Rab-2A	51750.8	52025.3	45559	55013.6	49062	48862.7
P61020	P61020;P61020-2	RAB5B_HUMAN	RAB5B	Ras-related protein Rab-5B	17545.2	16714.2	15004.5	17499	19947.8	16338.8
P61026	P61026	RAB10_HUMAN	RAB10	Ras-related protein Rab-10	134578	124439	109249	136813	144819	135055
P61077;P61077-2	P61077;P62837;P62837-2;P61077-2;P61077-3	UB2D3_HUMAN	UBE2D3	Ubiquitin-conjugating enzyme E2 D3	125659	76335.7	125914	121990	100271	105117
P61081	P61081	UBC12_HUMAN	UBE2M	NEDD8-conjugating enzyme Ubc12	106357	102422	106715	103452	107359	118502
P61086	P61086;P61086-3	UBE2K_HUMAN	UBE2K	Ubiquitin-conjugating enzyme E2 K	59094	57534.9	67520.7	55546.3	51183.4	62224.1
P61088	P61088	UBE2N_HUMAN	UBE2N	Ubiquitin-conjugating enzyme E2 N	133144	185092	219325	178799	140056	163584
P61106	P61106	RAB14_HUMAN	RAB14	Ras-related protein Rab-14	60237.6	49689.7	53440.8	60992.5	63543.3	59957.3
P61158	P61158	ARP3_HUMAN	ACTR3	Actin-related protein 3	17700.6	17826.6	16505.3	18605.3	14576.1	15985.5
P61160	P61160;P61160-2	ARP2_HUMAN	ACTR2	Actin-related protein 2	96544.5	92537.7	92494.1	91910.8	89594.7	82572.8
P61163	P61163	ACTZ_HUMAN	ACTR1A	Alpha-centractin	11279.3	14303.1	13322.2	13003.1	11837.3	10065.1
P61201	P61201;P61201-2	CSN2_HUMAN	COPS2	COP9 signalosome complex subunit 2	62571.6	67769.8	70160.3	73865.7	81778.9	72997
P61221	P61221	ABCE1_HUMAN	ABCE1	ATP-binding cassette sub-family E member 1	20133.9	21179.5	19829.9	18318.3	16363.4	17447.4
P61224;P61224-3	P61224;P62834;P61224-2;P61224-3	RAP1B_HUMAN	RAP1B	Ras-related protein Rap-1b	25900.1	27020.6	20401.3	24746.6	22982.8	26151.9
P61225	P61225	RAP2B_HUMAN	RAP2B	Ras-related protein Rap-2b	5509.01	4556.3	5298.11	5372.28	4485.29	3929.17
P61247	P61247	RS3A_HUMAN	RPS3A	Small ribosomal subunit protein eS1	112114	111655	127378	112593	108172	128430
P61254	P61254;Q9UNX3	RL26_HUMAN	RPL26	Large ribosomal subunit protein uL24	118944	123721	137078	105966	82478	129803
P61289-2	P61289;P61289-2;P61289-3	PSME3_HUMAN	PSME3	Isoform 2 of Proteasome activator complex subunit 3	126740	112810	114716	116496	122868	116476
P61313	P61313;P61313-2	RL15_HUMAN	RPL15	Large ribosomal subunit protein eL15	65616.8	51163.3	61458.3	53947.5	53462.5	65762
P61326;Q96A72	P61326;Q96A72;P61326-2	MGN2_HUMAN;MGN_HUMAN	MAGOH;MAGOHB	Protein mago nashi homolog	6618.93	7833.03	8052.14	8571.13	6595.53	5633.18
P61353	P61353	RL27_HUMAN	RPL27	Large ribosomal subunit protein eL27	269896	271863	254752	235342	232923	229542
P61421	P61421	VA0D1_HUMAN	ATP6V0D1	V-type proton ATPase subunit d 1	9991.94	16100.4	16115.7	9480.62	13394.1	12143.3
P61513	P61513;A6NKH3	RL37A_HUMAN	RPL37A	Large ribosomal subunit protein eL43	32385.6	46100.5	45156.6	35099.9	37091.2	34559.9
P61586	P08134;P61586;P62745	RHOA_HUMAN	RHOA	Transforming protein RhoA	67841	78774.2	71695.6	74813	80160.1	71541.3
P61604	P61604	CH10_HUMAN	HSPE1	10 kDa heat shock protein, mitochondrial	25071.3	30577.3	25689.6	22494	26744	34008.3
P61619;P61619-3	P61619;P61619-3	S61A1_HUMAN	SEC61A1	Protein transport protein Sec61 subunit alpha isoform 1
P61626	P61626	LYSC_HUMAN	LYZ	Lysozyme C			4853.65
P61758	P61758	PFD3_HUMAN	VBP1	Prefoldin subunit 3	11342.5	10891.2	10300.5	9576.02	10526.9	9304.56
P61764;P61764-2	P61764;P61764-2	STXB1_HUMAN	STXBP1	Syntaxin-binding protein 1	6657.06	5355.46	6067.56	6438.72	6091.57	6490.76
P61769	P61769	B2MG_HUMAN	B2M	Beta-2-microglobulin	2561.86	3113.13	4026.43	3327.36	3898.27	3235.67
P61923;P61923-4	P61923;P61923-4;P61923-5	COPZ1_HUMAN	COPZ1	Coatomer subunit zeta-1	91892.4	95257.8	110598	77022	102306	76250.5
P61960	P61960	UFM1_HUMAN	UFM1	Ubiquitin-fold modifier 1	16608.7	18334.5	17249	15164.6	18564.1	18372.2
P61962	P61962	DCAF7_HUMAN	DCAF7	DDB1- and CUL4-associated factor 7	23625.3	20456.2	19549.8	22874.9	19664.7	23265.5
P61964	P61964	WDR5_HUMAN	WDR5	WD repeat-containing protein 5	11179.2	11438.2	10011.3	11044.9	8354.11	9699.39
P61966	P61966;P61966-2	AP1S1_HUMAN	AP1S1	AP-1 complex subunit sigma-1A	7715.02	7869.34	8232.17	7715.04	6313.38	4909.37
P61978-3	P61978;P61978-2;P61978-3	HNRPK_HUMAN	HNRNPK	Isoform 3 of Heterogeneous nuclear ribonucleoprotein K	181570	176218	197476	168146	162005	215083
P61981	P61981	1433G_HUMAN	YWHAG	14-3-3 protein gamma	14531.5	15869	17655.3	16998.3	14911.3	15501.2
P62068;P62068-4	P62068;P62068-2;P62068-3;P62068-4	UBP46_HUMAN	USP46	Ubiquitin carboxyl-terminal hydrolase 46				49386.6	59415.2	40527.2
P62070;P62070-3;P62070-4	P10301;P62070;P62070-3;P62070-4	RRAS2_HUMAN	RRAS2	Ras-related protein R-Ras2	6108.92	4534.99	4451.1	5602.11	4273.95	5430.28
P62081	P62081	RS7_HUMAN	RPS7	Small ribosomal subunit protein eS7	540943	522149	554314	623723	545873	581072
P62136	P62136;P62136-2	PP1A_HUMAN	PPP1CA	Serine/threonine-protein phosphatase PP1-alpha catalytic subunit	15781.9	16941.6	12369.7	9856.41	15017	12819.1
P62140	P62140	PP1B_HUMAN	PPP1CB	Serine/threonine-protein phosphatase PP1-beta catalytic subunit	17588.3	18965.9	20245.9	17600.9	14911.7	14960.3
P62191	P62191	PRS4_HUMAN	PSMC1	26S proteasome regulatory subunit 4	152004	146409	153133	158419	155349	167997
P62195;P62195-2	P62195;P62195-2	PRS8_HUMAN	PSMC5	26S proteasome regulatory subunit 8	139837	141213	139962	148886	133935	152558
P62241	P62241	RS8_HUMAN	RPS8	Small ribosomal subunit protein eS8	77399.1	84564.8	77102.4	77126.2	67236.3	82921.3
P62244	P62244	RS15A_HUMAN	RPS15A	Small ribosomal subunit protein uS8	210892	177047	160196	166991	207146	161052
P62249	P62249	RS16_HUMAN	RPS16	Small ribosomal subunit protein uS9	92904.9	86585.6	89484.8	74328.4	76346.7	105212
P62258	P62258;P62258-2	1433E_HUMAN	YWHAE	14-3-3 protein epsilon	17601.8	20586.6	18190.7	17748.3	18715.1	17915.8
P62263	P62263	RS14_HUMAN	RPS14	Small ribosomal subunit protein uS11	119008	96102.8	101496	118282	108585	136506
P62266	P62266	RS23_HUMAN	RPS23	Small ribosomal subunit protein uS12	181279	181540	177242	172642	168296	185097
P62269	P62269	RS18_HUMAN	RPS18	Small ribosomal subunit protein uS13	225196	216852	200968	183317	155321	196727
P62273;P62273-2	P62273;P62273-2	RS29_HUMAN	RPS29	Small ribosomal subunit protein uS14	6645.7	9649.94	10809.5	4734.08	8770.3	10363.2
P62277	P62277	RS13_HUMAN	RPS13	Small ribosomal subunit protein uS15	92923.2	78717.4	81708.8	83880.2	89721.4	84634.6
P62280	P62280	RS11_HUMAN	RPS11	Small ribosomal subunit protein uS17	157678	154691	153955	150434	152691	134092
P62304	P62304	RUXE_HUMAN	SNRPE	Small nuclear ribonucleoprotein E	80597.5	55697.4	51588.9	66558.3	75640.9	45855.3
P62306	P62306	RUXF_HUMAN	SNRPF	Small nuclear ribonucleoprotein F	7557.73	12464.9	14180.3	9816.95	12348.2	8640.91
P62310	P62310	LSM3_HUMAN	LSM3	U6 snRNA-associated Sm-like protein LSm3
P62312	P62312	LSM6_HUMAN	LSM6	U6 snRNA-associated Sm-like protein LSm6		616.752	224.204	690.538	1564.39
P62314	P62314	SMD1_HUMAN	SNRPD1	Small nuclear ribonucleoprotein Sm D1	34210.1	33167.4	32774.4	32879.9	29371.7	37214.1
P62316	P62316	SMD2_HUMAN	SNRPD2	Small nuclear ribonucleoprotein Sm D2	26412.4	36308.8	40887.2	35953.8	32268.5	29844.3
P62318;P62318-2	P62318;P62318-2	SMD3_HUMAN	SNRPD3	Small nuclear ribonucleoprotein Sm D3	74726.3	77881.4	82292.7	84025.9	74310.4	87704.4
P62330	P62330	ARF6_HUMAN	ARF6	ADP-ribosylation factor 6	37246.8	41307.2	44831.8	43928.5	41320.1	37387.3
P62333	P62333	PRS10_HUMAN	PSMC6	26S proteasome regulatory subunit 10B	94734.5	91744.4	93771.4	94023	105838	115296
P62380	P62380	TBPL1_HUMAN	TBPL1	TATA box-binding protein-like 1	13922.6	14431.5	14412.4	14675	14132.3	15340.1
P62424	P62424	RL7A_HUMAN	RPL7A	Large ribosomal subunit protein eL8	119694	100934	106392	95882.5	111478	106105
P62487	P62487	RPB7_HUMAN	POLR2G	DNA-directed RNA polymerase II subunit RPB7	12220.5	15639.4	14555.2	12682.5	13400.4	14570.9
P62491	P62491	RB11A_HUMAN	RAB11A	Ras-related protein Rab-11A	5629.34	5053.96	5161.81	4850.34	6171.35	5778.47
P62495	P62495;P62495-2	ERF1_HUMAN	ETF1	Eukaryotic peptide chain release factor subunit 1	366264	369063	481029	432343	345481	361316
P62633;P62633-2	P62633;P62633-2;P62633-4;P62633-5;P62633-6;P62633-8	CNBP_HUMAN	CNBP	CCHC-type zinc finger nucleic acid binding protein	3854.27	2877.04				1856.94
P62701	P62701;P22090;Q8TD47	RS4X_HUMAN	RPS4X	Small ribosomal subunit protein eS4, X isoform	205660	200462	196419	194455	188266	189807
P62750	P62750	RL23A_HUMAN	RPL23A	Large ribosomal subunit protein uL23	509837	471759	487413	483132	447434	489249
P62753	P62753	RS6_HUMAN	RPS6	Small ribosomal subunit protein eS6	350099	349574	305852	292184	377995	316368
P62760	P62760	VISL1_HUMAN	VSNL1	Visinin-like protein 1	9252	8969.11	9257.53	9491.11	8988.18	9772.63
P62805	P62805	H4_HUMAN	H4C1	Histone H4	339901	304532	363452	309752	283921	295259
P62820	P62820;P62820-2	RAB1A_HUMAN	RAB1A	Ras-related protein Rab-1A	10845.8	19882.6	12194.3	10213.6	18751.7	21255.7
P62826	P62826	RAN_HUMAN	RAN	GTP-binding nuclear protein Ran	164862	175091	137400	153481	162614	160296
P62829	P62829	RL23_HUMAN	RPL23	Large ribosomal subunit protein uL14	201288	233067	220759	258105	209088	250801
P62837	P62837	UB2D2_HUMAN	UBE2D2	Ubiquitin-conjugating enzyme E2 D2	1467.37			1277.7	1208.77	2383.95
P62841	P62841	RS15_HUMAN	RPS15	Small ribosomal subunit protein uS19	96064.5	114777	112199	94843.4	92404.4	108713
P62847;P62847-2;P62847-3;P62847-4	P62847;P62847-2;P62847-3;P62847-4	RS24_HUMAN	RPS24	Small ribosomal subunit protein eS24	62068	57116.7	61362.4	62159.8	55508.9	71979.8
P62851	P62851	RS25_HUMAN	RPS25	Small ribosomal subunit protein eS25	81988.9	98006.3	116447	82300.5	81139.8	108200
P62854	P62854;Q5JNZ5	RS26_HUMAN	RPS26	Small ribosomal subunit protein eS26	7235.84	11084.2	7921.9	4623.59	5077.6	4475.3
P62857	P62857	RS28_HUMAN	RPS28	Small ribosomal subunit protein eS28	126349	261289	263000	173494	126786	134313
P62861	P62861	RS30_HUMAN	FAU	Ubiquitin-like FUBI-ribosomal protein eS30 fusion protein	21829.1	34442.7	32022.9	31667.7	17963.3	36238
P62873	P62873;P62873-2	GBB1_HUMAN	GNB1	Guanine nucleotide-binding protein G(I)/G(S)/G(T) subunit beta-1	42706.4	66832.1	50865.5	43353.5	73271.9	61781
P62875	P62875	RPAB5_HUMAN	POLR2L	DNA-directed RNA polymerases I, II, and III subunit RPABC5	11287.8	8610.07	15661.1	11160.4	11017.1	15509.9
P62877	P62877	RBX1_HUMAN	RBX1	E3 ubiquitin-protein ligase RBX1	8944.75	10087.7	15703.9	10151.7	4084.55	10858.8
P62879	P62873;P62879;P62879-2	GBB2_HUMAN	GNB2	Guanine nucleotide-binding protein G(I)/G(S)/G(T) subunit beta-2	85030.7	90226.6	89282.1	91029.8	95833.4	83646.2
P62888	P62888	RL30_HUMAN	RPL30	Large ribosomal subunit protein eL30	94850.8	109154	105956	93190.8	115258	99967.1
P62899;P62899-2;P62899-3	P62899;P62899-2;P62899-3	RL31_HUMAN	RPL31	Large ribosomal subunit protein eL31	66682	59943.9	69300.2	69544.4	49743.8	79048.1
P62906	P62906	RL10A_HUMAN	RPL10A	Large ribosomal subunit protein uL1	43984.4	36684.4	49502.5	41478.1	36562.9	54091.2
P62910	P62910	RL32_HUMAN	RPL32	Large ribosomal subunit protein eL32	31697.7	28348	32566.1	25352.2	30824	33220.8
P62913-2	P62913;P62913-2	RL11_HUMAN	RPL11	Isoform 2 of Large ribosomal subunit protein uL5	238421	226030	263285	247453	274583	340042
P62917	P62917	RL8_HUMAN	RPL8	Large ribosomal subunit protein uL2	172446	142357	151958	143850	146850	154814
P62937	P62937	PPIA_HUMAN	PPIA	Peptidyl-prolyl cis-trans isomerase A	380300	454921	377848	353090	340344	326974
P62979	P62979	RS27A_HUMAN	RPS27A	Ubiquitin-ribosomal protein eS31 fusion protein	2738200	220070	658888	2647940	4277380	3353440
P62995;P62995-3	P62995;P62995-3	TRA2B_HUMAN	TRA2B	Transformer-2 protein homolog beta	8900.77	8141.41	5815.07	8183.29	7902.22	7569.12
P63000;P63000-2	P15153;P60763;P63000;P63000-2	RAC1_HUMAN	RAC1	Ras-related C3 botulinum toxin substrate 1	22590.5	20447.6	20265.2	20945.9	24895.6	21535.9
P63010;P63010-2	P63010;P63010-2;Q10567;Q10567-3;P63010-3;Q10567-2;Q10567-4	AP2B1_HUMAN	AP2B1	AP-2 complex subunit beta	109149	119154	118433	120236	112989	103218
P63092;P63092-2;P63092-3;P63092-4;Q5JWF2;Q5JWF2-2	P63092;Q5JWF2;P63092-2;P63092-3;P63092-4;Q5JWF2-2	GNAS1_HUMAN;GNAS2_HUMAN	GNAS	Guanine nucleotide-binding protein G(s) subunit alpha isoforms short	184196	193333	191771	191997	185328	209242
P63096-2	P63096;P63096-2	GNAI1_HUMAN	GNAI1	Isoform 2 of Guanine nucleotide-binding protein G(i) subunit alpha-1	5945.39	4940.79	5773.27	5354.1	4693.97	4519.85
P63104	P63104;P63104-2	1433Z_HUMAN	YWHAZ	14-3-3 protein zeta/delta	83587.6	94807.4	103093	87785.2	76678.7	82185.5
P63128	P63128;P62684;P63126;P63130;P63145;P87889;Q7LDI9;Q9YNA8;P62685	POK9_HUMAN	ERVK-9	Endogenous retrovirus group K member 9 Pol protein	12064.1	7908.69	11355.3	9329.21	10200.2	10098.6
P63151;P63151-2	P63151;P63151-2	2ABA_HUMAN	PPP2R2A	Serine/threonine-protein phosphatase 2A 55 kDa regulatory subunit B alpha isoform	19813.2	22320.3	15266.8	18707	15532.6	18528.3
P63165	G2XKQ0;P63165	SUMO1_HUMAN	SUMO1	Small ubiquitin-related modifier 1	30400	27402.7	27372.4	31358	37552.4	28949.4
P63167	P63167;Q96FJ2	DYL1_HUMAN	DYNLL1	Dynein light chain 1, cytoplasmic	36260.7	30824.7	40904.8	31900.2	36911.8	32254.1
P63172	P63172	DYLT1_HUMAN	DYNLT1	Dynein light chain Tctex-type 1	2243	2625.58	1506.83	1470.55	1935.6	1687.71
P63173	P63173	RL38_HUMAN	RPL38	Large ribosomal subunit protein eL38	10143.7	10084.4	12831.8	11620.2	11459.5	16651.9
P63208	P63208	SKP1_HUMAN	SKP1	S-phase kinase-associated protein 1	3571.47	3896.24	5312.13	3769.33		2509.59
P63220	P63220	RS21_HUMAN	RPS21	Small ribosomal subunit protein eS21	38996.4	39274.6	52831.7	39569.9	39407.3	49392.8
P63241;P63241-2	P63241;Q6IS14;P63241-2	IF5A1_HUMAN	EIF5A	Eukaryotic translation initiation factor 5A-1	15126.6	18619.9	15050.1	15753.4	18594.1	15724.7
P63244	P63244	RACK1_HUMAN	RACK1	Small ribosomal subunit protein RACK1	335629	462603	425307	344180	348850	309713
P63272	P63272	SPT4H_HUMAN	SUPT4H1	Transcription elongation factor SPT4	12862	11698.9	17113.3	13367.4	9232.73	15943.2
P63279	P63279	UBC9_HUMAN	UBE2I	SUMO-conjugating enzyme UBC9	3059.66	4076.3	2230.46			2239.96
P67775	P62714;P67775;P67775-2	PP2AA_HUMAN	PPP2CA	Serine/threonine-protein phosphatase 2A catalytic subunit alpha isoform	15197.6	17438.2	17822.3	16301	17024.9	14270.7
P67809	P16989;P67809;Q9Y2T7;P16989-2;P16989-3	YBOX1_HUMAN	YBX1	Y-box-binding protein 1	12995.5	17135.8	12852.8	16211	12689.4	14229
P67812;P67812-3;P67812-4	P67812;P67812-3;P67812-4	SC11A_HUMAN	SEC11A	Signal peptidase complex catalytic subunit SEC11A	2097.61	1848.44	2243.88	1958.14	2326	1341.85
P67870	P67870	CSK2B_HUMAN	CSNK2B	Casein kinase II subunit beta	5950.61	10177.9		6402.71	7724.45	7254.67
P68036;P68036-2;P68036-3	P68036;A0A1B0GUS4;P68036-2;P68036-3	UB2L3_HUMAN	UBE2L3	Ubiquitin-conjugating enzyme E2 L3	3435.57	5122.82	4140.25	3541.15	3181.9	2334.39
P68104;Q5VTE0	P68104;Q5VTE0	EF1A1_HUMAN;EF1A3_HUMAN	EEF1A1;EEF1A1P5	Elongation factor 1-alpha 1	1415630	1510260	1412720	1510040	1605480	1313320
P68133	P68032;P68133	ACTS_HUMAN	ACTA1	Actin, alpha skeletal muscle	300055	301294	314168	348971	376567	426964
P68366;P68366-2	P68363;P68366;P68363-2;P68366-2	TBA4A_HUMAN	TUBA4A	Tubulin alpha-4A chain	1597410	1707630	1767420	1591520	1751170	1628700
P68371	P68371	TBB4B_HUMAN	TUBB4B	Tubulin beta-4B chain	187339	86560.7	168460	74283.1	83877.3	133096
P68400	P68400;P68400-2	CSK21_HUMAN	CSNK2A1	Casein kinase II subunit alpha	6552.84	7096.04	7048.28	6034.75	4533.2	4788.57
P68402	P68402;P68402-2;P68402-3;P68402-4	PA1B2_HUMAN	PAFAH1B2	Platelet-activating factor acetylhydrolase IB subunit alpha2	8716.18	12522.9	7838.93	3568.78	10472.1	16394.6
P68431;P84243;Q16695;Q71DI3	P68431;P84243;Q16695;Q6NXT2;Q71DI3;Q5TEC6	H31T_HUMAN;H31_HUMAN;H32_HUMAN;H33_HUMAN	H3-3A;H3-4;H3C1;H3C15	Histone H3.1		20329.8	22983.7	12639.1	10838.3	25061.1
P68871	P02042;P02100;P68871;P69891;P69892	HBB_HUMAN	HBB	Hemoglobin subunit beta	269654	325086	380862	276188	352294	312042
P69905	P69905	HBA_HUMAN	HBA1	Hemoglobin subunit alpha	249855	254857	281309	247175	253922	260614
P78312;P78312-2;P78312-5;P78312-6	P78312;P78312-2;P78312-3;P78312-4;P78312-5;P78312-6	F193A_HUMAN	FAM193A	Protein FAM193A	2605.82	2964.83	2737.55	2789.66	3406.26	3714.71
P78316;P78316-2	P78316;P78316-2	NOP14_HUMAN	NOP14	Nucleolar protein 14	1958.49	2960.16	2719.73	2563.55	2543.6	3826.72
P78318	P78318	IGBP1_HUMAN	IGBP1	Immunoglobulin-binding protein 1	6234.01	4628.12	5483.44	5582.06	3770.24	5689.94
P78330	P78330	SERB_HUMAN	PSPH	Phosphoserine phosphatase	4348.78	4396.88	6094.62	6420.76	4637.65	5939.03
P78332	P78332;P78332-2	RBM6_HUMAN	RBM6	RNA-binding protein 6			1565.73
P78344	P78344;P78344-2	IF4G2_HUMAN	EIF4G2	Eukaryotic translation initiation factor 4 gamma 2	682558	696102	707841	701310	777703	666775
P78345	P78345	RPP38_HUMAN	RPP38	Ribonuclease P protein subunit p38	10406	9191.33	12843.2	15108.9	10977.5	13573.2
P78346;P78346-2	P78346;P78346-2	RPP30_HUMAN	RPP30	Ribonuclease P protein subunit p30	13346.6	15013.4	12763.9	12563.9	11245.1	12341.6
P78347;P78347-2;P78347-3;P78347-4	P78347;P78347-2;P78347-3;P78347-4;P78347-5	GTF2I_HUMAN	GTF2I	General transcription factor II-I	206214	186685	190911	208878	200750	210078
P78356	P78356;P78356-2	PI42B_HUMAN	PIP4K2B	Phosphatidylinositol 5-phosphate 4-kinase type-2 beta	1838.77		2160.7	1212.79		4543.71
P78362;P78362-2	P78362;P78362-2	SRPK2_HUMAN	SRPK2	SRSF protein kinase 2	6376.34	6226.14	6741.25	6447.24	6474.98	8854.2
P78368	P78368;Q9HCP0;Q9Y6M4;Q9Y6M4-2;Q9Y6M4-3;Q9Y6M4-4;Q9Y6M4-5;Q9Y6M4-6;Q9HCP0-2	KC1G2_HUMAN	CSNK1G2	Casein kinase I isoform gamma-2	10061.7	8117.55	10017.5	10230.5	8745.14	9760.67
P78371	P78371;P78371-2	TCPB_HUMAN	CCT2	T-complex protein 1 subunit beta	295952	272613	286073	297002	307875	268993
P78385	P78385	KRT83_HUMAN	KRT83	Keratin, type II cuticular Hb3
P78386	P78385;P78386;A6NCN2	KRT85_HUMAN	KRT85	Keratin, type II cuticular Hb5
P78395	P78395	PRAME_HUMAN	PRAME	Melanoma antigen preferentially expressed in tumors	3001.62	3159.12	4928.86	3633.04	5557.21	3784.72
P78406	P78406	RAE1L_HUMAN	RAE1	mRNA export factor RAE1	10579.3	9952.15	10439.6	10604.3	10874.9	11048.7
P78417	P78417;P78417-3	GSTO1_HUMAN	GSTO1	Glutathione S-transferase omega-1	26685.2	28487.8	23750.2	17164.2	13781.9	15757.5
P78504	P78504;P78504-2	JAG1_HUMAN	JAG1	Protein jagged-1	1428.25	1487.19	1977.62	2268.18	1302.99	2874.81
P78527	P78527;P78527-2	PRKDC_HUMAN	PRKDC	DNA-dependent protein kinase catalytic subunit	64506.1	66543.3	66512.8	68767.7	58978.1	64785.6
P78549;P78549-2;P78549-3	P78549;P78549-2;P78549-3	NTH_HUMAN	NTHL1	Endonuclease III-like protein 1	13663.2	11136.6	13277.2	17663.4	13344.2	14676.3
P78560	P78560	CRADD_HUMAN	CRADD	Death domain-containing protein CRADD	1351.81	1093.21	944.661
P80217;P80217-2	P80217;P80217-2	IN35_HUMAN	IFI35	Interferon-induced 35 kDa protein	5417.62	4883.28	5671.22	5993.1	4107.32	6523.36
P81274	P81274	GPSM2_HUMAN	GPSM2	G-protein-signaling modulator 2	15873.7	9805.38	9704.14	11057	11618.2	11600.1
P81605	P81605;P81605-2	DCD_HUMAN	DCD	Dermcidin	7727.65	3919.38	43557.2	2712.34	5982.09	7619.25
P82650	P82650;P82650-2	RT22_HUMAN	MRPS22	Small ribosomal subunit protein mS22	17953.9	14175.9	14796.4	16683.7	15488.1	16107.8
P82663;P82663-2	P82663;P82663-2;P82663-3	RT25_HUMAN	MRPS25	Small ribosomal subunit protein mS25	6621.17	8473.11	7468.26	9246.86	7856.28	7898.93
P82664	P82664	RT10_HUMAN	MRPS10	Small ribosomal subunit protein uS10m	23515.4	24705.4	21261	26397.3	28440.2	22974.8
P82673	P82673	RT35_HUMAN	MRPS35	Small ribosomal subunit protein mS35	38057.5	43156.8	37296.6	38667.9	37072.9	32102.7
P82675	P82675;P82675-2	RT05_HUMAN	MRPS5	Small ribosomal subunit protein uS5m	13679.2	14189.9	14342.4	14712.1	12248.8	14347.6
P82912;P82912-2	P82912;P82912-2;P82912-3	RT11_HUMAN	MRPS11	Small ribosomal subunit protein uS11m	12108.9	17144.9	6210.8	9873.51	14716.4	11403.1
P82914	P82914	RT15_HUMAN	MRPS15	Small ribosomal subunit protein uS15m	11868.8	11093.8	10800.7	11967.4	11204.7	13149
P82921	P82921	RT21_HUMAN	MRPS21	Small ribosomal subunit protein bS21m	3574.65	3301.59	3870.82	4593.92	4285.2	5813.25
P82930	P82930	RT34_HUMAN	MRPS34	Small ribosomal subunit protein mS34	8863.97	11611.9	7362.83	8870.31	8088.48	10146.9
P82932	P82932	RT06_HUMAN	MRPS6	Small ribosomal subunit protein bS6m	10173	11427.4	14616.4	14441.4	13884.7	14989.1
P82933	P82933	RT09_HUMAN	MRPS9	Small ribosomal subunit protein uS9m	16200.9	15457.5	17266.2	19329.1	17811.6	21102.5
P83111	P83111	LACTB_HUMAN	LACTB	Serine beta-lactamase-like protein LACTB, mitochondrial	11417.9	11442.1	12049.1	11868.2	12508.7	10449.8
P83436	P83436	COG7_HUMAN	COG7	Conserved oligomeric Golgi complex subunit 7	7694.34	5250.76	8125.5	8544.3	9418.66	9798.58
P83731	P83731	RL24_HUMAN	RPL24	Large ribosomal subunit protein eL24	191880	195351	203867	181511	213495	183479
P83876	P83876	TXN4A_HUMAN	TXNL4A	Thioredoxin-like protein 4A	1280.92	1776.62	2078.16	1737.25	2562.21	2293.58
P83881	P83881	RL36A_HUMAN	RPL36A	Large ribosomal subunit protein eL42	7118.74	2729.95	5676.07	3657.27	3997.77	4007.66
P84022	P84022	SMAD3_HUMAN	SMAD3	Mothers against decapentaplegic homolog 3	17119.7	17373.1	16549.7	17606.3	19599.6	15050.5
P84077	P61204;P84077;P61204-2	ARF1_HUMAN	ARF1	ADP-ribosylation factor 1	168806	156368	170347	204268	170485	153466
P84085	P84085	ARF5_HUMAN	ARF5	ADP-ribosylation factor 5	227436	225303	243214	248904	206426	191590
P84095	P84095	RHOG_HUMAN	RHOG	Rho-related GTP-binding protein RhoG	8304.68	9707.42	7939.91	8391.92	8173.82	9756.22
P84098	P84098	RL19_HUMAN	RPL19	Large ribosomal subunit protein eL19	101371	88100.3	95197.3	97099	99050.1	107538
P84103;P84103-2	P84103;P84103-2	SRSF3_HUMAN	SRSF3	Serine/arginine-rich splicing factor 3	35961.6	30325.1	26560.8	29925.3	33182	29550.2
P85037	P85037;P85037-2	FOXK1_HUMAN	FOXK1	Forkhead box protein K1	41845.6	37826	38418.4	37732.2	38392.3	43194
P85298;P85298-3;P85298-4	P85298;P85298-2;P85298-3;P85298-4;P85298-5	RHG08_HUMAN	ARHGAP8	Rho GTPase-activating protein 8	9595.32	10584.4	8551.58	9216.38	8076.1	9057.53
P86790;P86791	P86791;P86790	CCZ1B_HUMAN;CCZ1_HUMAN	CCZ1;CCZ1B	Vacuolar fusion protein CCZ1 homolog B	25615.8	24490.6	25541.2	25080.2	25858.7	26340.3
P98160	P98160	PGBM_HUMAN	HSPG2	Basement membrane-specific heparan sulfate proteoglycan core protein	2144.29	2244.12	2536.16	3163.86	2534.8	1883.16
P98170	P98170	XIAP_HUMAN	XIAP	E3 ubiquitin-protein ligase XIAP	9334.05	8178.64	7280.21	8737.72	7795.26	6916.86
P98174	P98174	FGD1_HUMAN	FGD1	FYVE, RhoGEF and PH domain-containing protein 1	9249.02	7106.38	6994.55	6876.75	8643.19	5563.23
P98175;P98175-2;P98175-5	P98175;P98175-2;P98175-3;P98175-4;P98175-5	RBM10_HUMAN	RBM10	RNA-binding protein 10	18199	15243.3	17427.9	18378.8	16532	16736.2
P98179	P98179	RBM3_HUMAN	RBM3	RNA-binding protein 3	4743.39	4973.63	3968.06	4941.52	4133.47	4626.35
P99999	P99999	CYC_HUMAN	CYCS	Cytochrome c	17539.2	18501.2	15469.6	19097.1	18136	20055.8
Q00013	Q00013;Q00013-2;Q00013-3	EM55_HUMAN	MPP1	55 kDa erythrocyte membrane protein	12881.1	12822.4	12510.4	11275.3	11763.4	14945.4
Q00325-2	Q00325-2	S25A3_HUMAN	SLC25A3	Isoform B of Solute carrier family 25 member 3	111672	122723	103854	108187	98683.9	121606
Q00341	Q00341;Q00341-2	VIGLN_HUMAN	HDLBP	Vigilin	400585	368545	394050	423502	467643	421763
Q00403	Q00403	TF2B_HUMAN	GTF2B	Transcription initiation factor IIB	29901.2	30023.7	32278.3	32751.6	33776.3	25363.2
Q00534	Q00534	CDK6_HUMAN	CDK6	Cyclin-dependent kinase 6	13641.2	14547.3	16763.4	16098.9	14770.6	19044.7
Q00535	Q00535;Q00535-2	CDK5_HUMAN	CDK5	Cyclin-dependent kinase 5	18880	15257.9	18604.4	20196.8	17903	21121.3
Q00536;Q00536-2;Q00536-3	Q00536;Q00536-2;Q00536-3	CDK16_HUMAN	CDK16	Cyclin-dependent kinase 16	18028.3	16717	16857.8	18513.2	18154.2	16743
Q00537;Q00537-2	Q00537;Q00537-2	CDK17_HUMAN	CDK17	Cyclin-dependent kinase 17	11876.7	13025.2	10427.7	15363.4	13182.1	14578.2
Q00577	Q00577	PURA_HUMAN	PURA	Transcriptional activator protein Pur-alpha	5571.41		4503.75	5316.95	7366.66	6249.06
Q00587;Q00587-2	Q00587;Q00587-2	BORG5_HUMAN	CDC42EP1	Cdc42 effector protein 1	18996.3	26346.7	21324	18000.7	43003.1	19546.1
Q00610-2	Q00610;Q00610-2	CLH1_HUMAN	CLTC	Isoform 2 of Clathrin heavy chain 1	249137	269968	258006	253782	244917	243710
Q00613;Q00613-2	Q00613;Q00613-2	HSF1_HUMAN	HSF1	Heat shock factor protein 1	57533.2	46123.7	48279.6	53743.2	57505.6	50292.7
Q00653-4	Q00653;Q00653-3;Q00653-4	NFKB2_HUMAN	NFKB2	Isoform 4 of Nuclear factor NF-kappa-B p100 subunit	37188	33511.6	33356.6	33968.7	38804	34284.6
Q00796	Q00796	DHSO_HUMAN	SORD	Sorbitol dehydrogenase	18210.8	23702.9	16712.9	18593.9	19020.6	16791.9
Q00839;Q00839-2	Q00839;Q00839-2	HNRPU_HUMAN	HNRNPU	Heterogeneous nuclear ribonucleoprotein U	629286	612069	630494	719767	690872	797131
Q00978	Q00978	IRF9_HUMAN	IRF9	Interferon regulatory factor 9	7061.01	6183.89	7863.08	8739.95	7499.89	7335.54
Q01081	Q01081;Q01081-2;Q01081-4	U2AF1_HUMAN	U2AF1	Splicing factor U2AF 35 kDa subunit	3413.75	2935.45	3422.74	2775.04	2836.05	3911.28
Q01082	Q01082;Q01082-2;Q01082-3	SPTB2_HUMAN	SPTBN1	Spectrin beta chain, non-erythrocytic 1	35058.6	30493.2	33670.9	36185.9	32999.8	40934.5
Q01085-2	P31483;Q01085;Q01085-2;P31483-2;P31483-3	TIAR_HUMAN	TIAL1	Isoform 2 of Nucleolysin TIAR	12380.6	11161.3	11247.1	11756.1	13880.9	15456.6
Q01130;Q01130-2	Q01130;Q01130-2	SRSF2_HUMAN	SRSF2	Serine/arginine-rich splicing factor 2	12739.4	13788.9	8174.45	11492.7	11646.1	9279.68
Q01167;Q01167-2	Q01167;Q01167-2	FOXK2_HUMAN	FOXK2	Forkhead box protein K2	15478.1	14102.6	14516.8	14246.2	16232.7	14132.6
Q01201	Q01201	RELB_HUMAN	RELB	Transcription factor RelB		3760.92		3887.9		3359.45
Q01433;Q01433-2;Q01433-4;Q01433-5	Q01433;Q01433-2;Q01433-4;Q01433-5	AMPD2_HUMAN	AMPD2	AMP deaminase 2	2531.97	4043.98	2233.72	1841.82	2879.38	5538.93
Q01469	Q01469	FABP5_HUMAN	FABP5	Fatty acid-binding protein 5
Q01484;Q01484-2;Q01484-5	Q01484;Q01484-2;Q01484-5;Q01484-7	ANK2_HUMAN	ANK2	Ankyrin-2	6469.58	6744.88	8075.68	6396.06	8291.68	9911.13
Q01518	Q01518;Q01518-2	CAP1_HUMAN	CAP1	Adenylyl cyclase-associated protein 1	13757.2	13107.6	15335.1	13399.6	13394.5	14083.2
Q01581	Q01581	HMCS1_HUMAN	HMGCS1	Hydroxymethylglutaryl-CoA synthase, cytoplasmic	22698.1	26614.5	24515.7	22991.5	23891.8	25640.1
Q01650	Q01650	LAT1_HUMAN	SLC7A5	Large neutral amino acids transporter small subunit 1	3548.42	3960.68	3366.16	4365.04	2837.92	3520.69
Q01658	Q01658	NC2B_HUMAN	DR1	Protein Dr1	4440.13	3756.33	4313.45	4766	4225.81	4710.07
Q01664	Q01664	TFAP4_HUMAN	TFAP4	Transcription factor AP-4	831.902	373.427	489.873	541.528	122.654	481.671
Q01780	Q01780;Q01780-2	EXOSX_HUMAN	EXOSC10	Exosome complex component 10	55892.2	53723	54471.4	56412.4	58558.5	56657.7
Q01804	Q01804;Q01804-3;Q01804-5	OTUD4_HUMAN	OTUD4	OTU domain-containing protein 4	14172.2	26752.3	26888.4	52236	54816.7	42843.7
Q01813	Q01813;Q01813-2	PFKAP_HUMAN	PFKP	ATP-dependent 6-phosphofructokinase, platelet type	155394	172653	156604	161457	166148	161213
Q01826;Q01826-2	Q01826;Q9UPW6;Q01826-2;Q9UPW6-2	SATB1_HUMAN	SATB1	DNA-binding protein SATB1	3399.52	2936.32	4392.34	3544.83	3570.46	4358.49
Q01844;Q01844-2;Q01844-3;Q01844-5;Q01844-6	Q01844;Q01844-2;Q01844-3;Q01844-5;Q01844-6	EWS_HUMAN	EWSR1	RNA-binding protein EWS	5391.31	5191.03	3537.07	3091.63	3999.72	5903.22
Q01850	Q01850	CDR2_HUMAN	CDR2	Cerebellar degeneration-related protein 2	4113.36	2825.45	1563.34	3769.15	2866.27	2899.06
Q01860	Q01860;Q06416;Q01860-2	PO5F1_HUMAN	POU5F1	POU domain, class 5, transcription factor 1	16045.9	22172.6	20019.2	16669.4	10934.4	12436.5
Q01968;Q01968-2	Q01968;Q01968-2	OCRL_HUMAN	OCRL	Inositol polyphosphate 5-phosphatase OCRL	21345	18249.6	21051.8	19321.1	20993.6	19935.5
Q01970;Q01970-2	Q01970;Q01970-2	PLCB3_HUMAN	PLCB3	1-phosphatidylinositol 4,5-bisphosphate phosphodiesterase beta-3	5795.23	6961.79	5899.67	6928.93	5961.29	5895.38
Q01974	Q01974	ROR2_HUMAN	ROR2	Tyrosine-protein kinase transmembrane receptor ROR2	1340.26	1565.57		2163.68	534.307	2343.4
Q02040;Q02040-2;Q02040-3	Q02040;Q02040-3;Q02040-2	AK17A_HUMAN	AKAP17A	A-kinase anchor protein 17A	1932.79	2027.11	3068.71	2844.95	2463.08	2743.94
Q02083;Q02083-2	Q02083;Q02083-2	NAAA_HUMAN	NAAA	N-acylethanolamine-hydrolyzing acid amidase	5265.29	4495.55	7034.4	5626.62	5555.22	6975.39
Q02086;Q02086-2	Q02086;Q02086-2	SP2_HUMAN	SP2	Transcription factor Sp2	1062.47	853.919	997.604	2391.22	1238.12	865.789
Q02153;Q02153-2	Q02153;Q02153-2;Q02153-3	GCYB1_HUMAN	GUCY1B1	Guanylate cyclase soluble subunit beta-1	2999.48	2572.81	2742.49	3158.04	2239.97	3064.01
Q02218;Q02218-2	Q02218;Q02218-2;Q02218-3	ODO1_HUMAN	OGDH	2-oxoglutarate dehydrogenase complex component E1	43750.6	43667.5	40982.9	45826.1	47982.5	40990.3
Q02224;Q02224-3	Q02224;Q02224-3	CENPE_HUMAN	CENPE	Centromere-associated protein E	7389.93	5520.57	5673.65	5772.3	6835.47	6389.29
Q02241	Q02241;Q02241-2;Q02241-3	KIF23_HUMAN	KIF23	Kinesin-like protein KIF23	17844	15008.6	14827	17451.8	15657.9	16434.5
Q02252	Q02252	MMSA_HUMAN	ALDH6A1	Methylmalonate-semialdehyde/malonate-semialdehyde dehydrogenase [acylating], mitochondrial	58885.3	61699.9	57843.6	59040.9	61486.8	61987.6
Q02338	Q02338	BDH_HUMAN	BDH1	D-beta-hydroxybutyrate dehydrogenase, mitochondrial	12518.6	12273.1	11511.6	13435.9	15561.3	12937.5
Q02413	Q02413	DSG1_HUMAN	DSG1	Desmoglein-1	3330.57	4617.36	6666.1	4206.04	5434.19	2997.77
Q02447	Q02447;Q02447-2;Q02447-3;Q02447-4;Q02447-5;Q02447-6	SP3_HUMAN	SP3	Transcription factor Sp3	5306.12	3363.66	3107.04	4156.31	4413.4	5631.69
Q02543	Q02543	RL18A_HUMAN	RPL18A	Large ribosomal subunit protein eL20	106831	101262	111383	130315	97358.3	126840
Q02750	Q02750;Q02750-2	MP2K1_HUMAN	MAP2K1	Dual specificity mitogen-activated protein kinase kinase 1	43306.3	33944.9	37864.7	40094.6	36687.9	41098.6
Q02790	Q02790	FKBP4_HUMAN	FKBP4	Peptidyl-prolyl cis-trans isomerase FKBP4	11518.8	11015.7	12645.6	11989.5	11331.3	14209.6
Q02809;Q02809-2	Q02809;Q02809-2	PLOD1_HUMAN	PLOD1	Procollagen-lysine,2-oxoglutarate 5-dioxygenase 1	27881.9	26759.3	29118.6	29921.3	27441.7	29205.4
Q02833;Q02833-2;Q02833-3	Q02833;Q02833-2;Q02833-3	RASF7_HUMAN	RASSF7	Ras association domain-containing protein 7	4700.65	4102.24	3141.48	3629.49	4591.03	4806.82
Q02878	Q02878	RL6_HUMAN	RPL6	Large ribosomal subunit protein eL6	127868	125670	127399	117919	139725	117569
Q02880;Q02880-2	Q02880;Q02880-2	TOP2B_HUMAN	TOP2B	DNA topoisomerase 2-beta	6660.95	8203.46	8195.38	7566.41	7164.89	7293.87
Q02952	Q02952;Q02952-2;Q02952-3	AKA12_HUMAN	AKAP12	A-kinase anchor protein 12	7601.95	5498.77	4197.03	6145.17	5994.94	7237.76
Q02978	Q02978;Q02978-2	M2OM_HUMAN	SLC25A11	Mitochondrial 2-oxoglutarate/malate carrier protein	10548.2	14235.9	10770	11445	8679.37	8943.5
Q03001	Q03001;Q03001-14;Q03001-8	DYST_HUMAN	DST	Dystonin	11365.5	10283.8	10941.8	11965.1	9911.07	10334.6
Q03111	Q03111	ENL_HUMAN	MLLT1	Protein ENL	5803	2628.58	1929.96	3687.83	2355.54	3755.34
Q03113;Q03113-2	Q03113;Q03113-2	GNA12_HUMAN	GNA12	Guanine nucleotide-binding protein subunit alpha-12						1474.47
Q03164;Q03164-2;Q03164-3	Q03164;Q03164-2;Q03164-3	KMT2A_HUMAN	KMT2A	Histone-lysine N-methyltransferase 2A	4007.02	4321.71	2644.78	3993.54	4757.88	3599.05
Q03169	Q03169	TNAP2_HUMAN	TNFAIP2	Tumor necrosis factor alpha-induced protein 2	2293	2850.25	3140.96	2957.05	3107.4	2283.19
[truncated: 3,388 more rows]

## Sheet: # of Cysteine DUBs KingFisher
Data for Figure S4a.
Total number	Number excluding isoforms	100% Valid values (across replicates)	With CVs <20%
55	49	53	46
T: Protein.Group	T: Protein.Ids	T: Protein.Names	T: Genes	T: First.Protein.Description	Ub probe 1	Ub probe 2	Ub probe 3		Ub probe mean	SD (formula =STDEV())	CV (%)
Q5VV17	Q5VV17	OTUD1_HUMAN	OTUD1	OTU domain-containing protein 1	761.174	1780.47	0		847.215	893.348	105.445
Q96BN8	Q96BN8	OTUL_HUMAN	OTULIN	Ubiquitin thioesterase otulin	6751.33	7347.49	7301.48		7133.43	331.71	4.65007
Q92995	Q92995;Q92995-2	UBP13_HUMAN	USP13	Ubiquitin carboxyl-terminal hydrolase 13	7471.15	5485.9	7976		6977.68	1316.35	18.8652
Q53GS9	Q53GS9;Q53GS9-2;Q53GS9-3	UBP39_HUMAN	USP39	Ubiquitin carboxyl-terminal hydrolase 39	19903.6	19948.9	18988.4		19613.6	541.941	2.76309
Q9Y6I4	Q9Y6I4;Q9Y6I4-2	UBP3_HUMAN	USP3	Ubiquitin carboxyl-terminal hydrolase 3	28194.9	31097.3	25010.6		28100.9	3044.44	10.8339
Q96AP4	Q96AP4	ZUP1_HUMAN	ZUP1	Zinc finger-containing ubiquitin peptidase 1	2961.21	5595.91	4593.24		4383.45	1329.82	30.3372
Q86T82	Q86T82;Q86T82-2	UBP37_HUMAN	USP37	Ubiquitin carboxyl-terminal hydrolase 37	13638.6	15154.3	12849		13880.6	1171.55	8.4402
Q9UPT9;Q9UPT9-2	Q9UPT9;Q9UPT9-2	UBP22_HUMAN	USP22	Ubiquitin carboxyl-terminal hydrolase 22	29090.9	35167.8	28439		30899.2	3711.03	12.0101
O94782	O94782	UBP1_HUMAN	USP1	Ubiquitin carboxyl-terminal hydrolase 1	21848.7	20794.3	20573.8		21072.3	681.389	3.23358
Q9P2H5	Q9P2H5;Q9P2H5-2	UBP35_HUMAN	USP35	Ubiquitin carboxyl-terminal hydrolase 35	9165.6	7520.37	6377.02		7687.66	1401.8	18.2344
Q86UV5	Q86UV5;Q86UV5-2;Q86UV5-3;Q86UV5-4;Q86UV5-7;Q86UV5-8	UBP48_HUMAN	USP48	Ubiquitin carboxyl-terminal hydrolase 48	37548.2	37556.4	40237.4		38447.3	1550.25	4.03214
Q70CQ2	Q70CQ2;Q70CQ2-2;Q70CQ2-3	UBP34_HUMAN	USP34	Ubiquitin carboxyl-terminal hydrolase 34	12844.9	12292.2	11042.1		12059.7	923.608	7.65861
Q6GQQ9;Q6GQQ9-2	Q6GQQ9;Q6GQQ9-2	OTU7B_HUMAN	OTUD7B	OTU domain-containing protein 7B	20564.5	22646.7	21221.8		21477.7	1064.42	4.95594
Q9UPU5	Q9UPU5	UBP24_HUMAN	USP24	Ubiquitin carboxyl-terminal hydrolase 24	51260.4	54045.8	47759.2		51021.8	3150.08	6.174
Q8NFA0	Q8NFA0	UBP32_HUMAN	USP32	Ubiquitin carboxyl-terminal hydrolase 32	49416.8	52500.7	43647.8		48521.8	4493.8	9.26142
Q96JH7	Q96JH7	VCIP1_HUMAN	VCPIP1	Deubiquitinating protein VCPIP1	90047.5	105985	87276.4		94436.3	10097	10.6918
Q8NB14	Q8NB14;Q8NB14-2	UBP38_HUMAN	USP38	Ubiquitin carboxyl-terminal hydrolase 38	25607.2	28674.4	20296.2		24859.3	4238.88	17.0515
Q14694;Q14694-2;Q14694-3	Q14694;Q14694-2;Q14694-3	UBP10_HUMAN	USP10	Ubiquitin carboxyl-terminal hydrolase 10	167778	191578	177750		179035	11951.9	6.67575
Q01804	Q01804;Q01804-3;Q01804-5	OTUD4_HUMAN	OTUD4	OTU domain-containing protein 4	52236	54816.7	42843.7		49965.5	6301.16	12.611
Q92560	Q92560	BAP1_HUMAN	BAP1	Ubiquitin carboxyl-terminal hydrolase BAP1	35880.8	38128.5	30485.6		34831.6	3927.98	11.2771
Q9H9J4;Q9H9J4-2	Q9H9J4;Q9H9J4-2	UBP42_HUMAN	USP42	Ubiquitin carboxyl-terminal hydrolase 42	10512.6	13015.4	10194.6		11240.9	1544.99	13.7444
A6NNY8	A6NNY8	UBP27_HUMAN	USP27X	Ubiquitin carboxyl-terminal hydrolase 27	3763.4	4925.04	2965.53		3884.66	985.367	25.3656
Q9Y2K6	Q9Y2K6	UBP20_HUMAN	USP20	Ubiquitin carboxyl-terminal hydrolase 20	8743.51	9803.61	8093.7		8880.27	863.12	9.71952
Q8TEY7;Q8TEY7-2	Q8TEY7;Q8TEY7-2;Q8TEY7-3	UBP33_HUMAN	USP33	Ubiquitin carboxyl-terminal hydrolase 33	7953.72	10778.2	7379.2		8703.71	1819.38	20.9036
Q96RU2-2	Q96RU2;Q96RU2-2	UBP28_HUMAN	USP28	Isoform 2 of Ubiquitin carboxyl-terminal hydrolase 28	141031	155949	121546		139509	17251.9	12.3662
Q70CQ4	Q70CQ4	UBP31_HUMAN	USP31	Ubiquitin carboxyl-terminal hydrolase 31	7117.25	7298.02	7190.68		7201.98	90.9135	1.26234
Q9UHP3	Q9UHP3;Q9UHP3-1;Q9UHP3-3	UBP25_HUMAN	USP25	Ubiquitin carboxyl-terminal hydrolase 25	32434.8	35984.5	27542.3		31987.2	4238.86	13.2517
Q9NQC7;Q9NQC7-2	Q9NQC7;Q9NQC7-2	CYLD_HUMAN	CYLD	Ubiquitin carboxyl-terminal hydrolase CYLD	24368.2	29747	20557		24890.7	4617.23	18.55
Q13107;Q13107-2	Q13107;Q13107-2;Q13107-3	UBP4_HUMAN	USP4	Ubiquitin carboxyl-terminal hydrolase 4	67389	72807.6	51677.4		63958	10975	17.1597
Q9NVE5;Q9NVE5-3	Q9NVE5;Q9NVE5-3	UBP40_HUMAN	USP40	Ubiquitin carboxyl-terminal hydrolase 40	32448.6	38334	33723.3		34835.3	3096.27	8.88831
Q96G74;Q96G74-2;Q96G74-3;Q96G74-5	Q96G74;Q96G74-2;Q96G74-3;Q96G74-4;Q96G74-5	OTUD5_HUMAN	OTUD5	OTU domain-containing protein 5	5059.35	6415.27	5253.28		5575.97	733.297	13.151
Q9Y5K5;Q9Y5K5-2;Q9Y5K5-3;Q9Y5K5-4	Q9Y5K5;Q9Y5K5-2;Q9Y5K5-3;Q9Y5K5-4	UCHL5_HUMAN	UCHL5	Ubiquitin carboxyl-terminal hydrolase isozyme L5	116155	138652	97367.2		117391	20670.2	17.6079
Q93008-3	O00507;Q93008;O00507-2;Q93008-3	USP9X_HUMAN	USP9X	Isoform 2 of Probable ubiquitin carboxyl-terminal hydrolase FAF-X	304736	297487	249650		283958	29931.6	10.5409
O94966-5	O94966;O94966-2;O94966-3;O94966-4;O94966-5;O94966-6;O94966-7	UBP19_HUMAN	USP19	Isoform 5 of Ubiquitin carboxyl-terminal hydrolase 19	202800	227296	178298		202798	24499	12.0805
P51784	P51784	UBP11_HUMAN	USP11	Ubiquitin carboxyl-terminal hydrolase 11	108886	109343	82689.8		100306	15258	15.2114
Q70CQ3	Q70CQ3	UBP30_HUMAN	USP30	Ubiquitin carboxyl-terminal hydrolase 30	14615.6	17655.4	13741.4		15337.5	2054.43	13.3948
Q9Y5T5;Q9Y5T5-2	Q9Y5T5;Q9Y5T5-2;Q9Y5T5-3;Q9Y5T5-5	UBP16_HUMAN	USP16	Ubiquitin carboxyl-terminal hydrolase 16	185716	224568	167280		192521	29244	15.19
Q96K76-4	Q96K76;Q96K76-2;Q96K76-4	UBP47_HUMAN	USP47	Isoform 4 of Ubiquitin carboxyl-terminal hydrolase 47	142205	150733	117436		136791	17296.1	12.6441
Q96FW1	Q96FW1;Q96FW1-2	OTUB1_HUMAN	OTUB1	Ubiquitin thioesterase OTUB1	400873	437499	339862		392745	49323.4	12.5586
Q8N6M0	Q8N6M0	OTU6B_HUMAN	OTUD6B	Deubiquitinase OTUD6B	77669.9	116910	64260.2		86280	27360.6	31.7114
Q93009	Q93009;Q93009-3	UBP7_HUMAN	USP7	Ubiquitin carboxyl-terminal hydrolase 7	855332	961540	717264		844712	122484	14.5001
P40818	P40818;P40818-2	UBP8_HUMAN	USP8	Ubiquitin carboxyl-terminal hydrolase 8	148526	160687	126405		145206	17380.5	11.9695
P54578	P54578;P54578-2;P54578-3	UBP14_HUMAN	USP14	Ubiquitin carboxyl-terminal hydrolase 14	797441	906489	602290		768740	154117	20.048
P09936	P09936	UCHL1_HUMAN	UCHL1	Ubiquitin carboxyl-terminal hydrolase isozyme L1	952136	1245370	809940		1002482	222038	22.1488
Q9P275	Q9P275	UBP36_HUMAN	USP36	Ubiquitin carboxyl-terminal hydrolase 36	11045.3	10005	9016.93		10022.4	1014.3	10.1203
P45974-2	P45974;P45974-2	UBP5_HUMAN	USP5	Isoform Short of Ubiquitin carboxyl-terminal hydrolase 5	563263	690044	520337		591215	88238.8	14.925
Q9Y4E8	Q9Y4E8;Q9Y4E8-2;Q9Y4E8-3;Q9Y4E8-4	UBP15_HUMAN	USP15	Ubiquitin carboxyl-terminal hydrolase 15	365032	406395	313912		361780	46327.2	12.8054
Q96DC9	Q96DC9	OTUB2_HUMAN	OTUB2	Ubiquitin thioesterase OTUB2	21611.4	23835.6	18702		21383	2574.41	12.0395
P15374	P15374	UCHL3_HUMAN	UCHL3	Ubiquitin carboxyl-terminal hydrolase isozyme L3	612353	724611	523758		620241	100659	16.229
Q5T2D3	Q5T2D3	OTUD3_HUMAN	OTUD3	OTU domain-containing protein 3	2203.58	1444.2	768.455		1472.08	717.969	48.7724
O75317	O75317	UBP12_HUMAN	USP12	Ubiquitin carboxyl-terminal hydrolase 12	5143.83	5272.23	3002.07		4472.71	1275.23	28.5113
Q70EL2	Q70EL2;Q70EL2-2	UBP45_HUMAN	USP45	Ubiquitin carboxyl-terminal hydrolase 45	2134.6	2859.23	2599.04		2530.96	367.081	14.5037
P62068;P62068-4	P62068;P62068-2;P62068-3;P62068-4	UBP46_HUMAN	USP46	Ubiquitin carboxyl-terminal hydrolase 46	49386.6	59415.2	40527.2		49776.3	9450.03	18.985
Q96K76	Q96K76	UBP47_HUMAN	USP47	Ubiquitin carboxyl-terminal hydrolase 47	10577.9	12239.2	8301.3		10372.8	1976.95	19.0589
P35125-3	P35125;P35125-3	UBP6_HUMAN	USP6	Isoform 3 of Ubiquitin carboxyl-terminal hydrolase 6	7071.11	0	6814.25		4628.45	4010.42	86.647

## Sheet: Ub volcano plot values
Data for Figure S4b.
Significant	-LOG(P-value)	Difference	Protein.Group	Protein.Ids	Protein.Names	Genes	First.Protein.Description	Symbol color	Symbol type	Symbol size	Show label	No probe 1	No probe 2	No probe 3	Ub probe 1	Ub probe 2	Ub probe 3
	0.717249	-0.222022	P01023	P01023	A2MG_HUMAN	A2M	Alpha-2-macroglobulin	Color2 [A=255, R=169, G=169, B=169]	1	4		16.5513	16.6757	16.5086	16.6172	16.1865	16.2658
	1.35127	-0.163444	Q9NRG9	Q9NRG9	AAAS_HUMAN	AAAS	Aladin	Color2 [A=255, R=169, G=169, B=169]	1	4		14.1618	14.242	14.2206	14.0766	14.113	13.9444
	0.469377	-0.145066	Q86V21	Q86V21;Q86V21-2	AACS_HUMAN	AACS	Acetoacetyl-CoA synthetase	Color2 [A=255, R=169, G=169, B=169]	1	4		14.0786	13.7295	13.7143	13.6321	13.8182	13.6368
	0.259477	-0.127134	Q6PD74	Q6PD74	AAGAB_HUMAN	AAGAB	Alpha- and gamma-adaptin-binding protein p34	Color2 [A=255, R=169, G=169, B=169]	1	4		14.3716	14.1993	14.3615	14.185	13.8592	14.5068
	0.123523	-0.0354932	Q2M2I8;Q2M2I8-2	Q2M2I8;Q2M2I8-2	AAK1_HUMAN	AAK1	AP2-associated protein kinase 1	Color2 [A=255, R=169, G=169, B=169]	1	4		13.9827	14.0077	14.1717	13.8917	13.9795	14.1844
	0.235129	0.0954962	Q13685	Q13685	AAMP_HUMAN	AAMP	Angio-associated migratory cell protein	Color2 [A=255, R=169, G=169, B=169]	1	4		12.8557	12.5868	12.3232	12.6821	12.7596	12.6106
	0.560306	0.092048	Q9Y312	Q9Y312	AAR2_HUMAN	AAR2	Protein AAR2 homolog	Color2 [A=255, R=169, G=169, B=169]	1	4		12.6766	12.5989	12.7598	12.688	12.8778	12.7457
	2.19295	0.170944	P49588	P49588;P49588-2	SYAC_HUMAN	AARS1	Alanine--tRNA ligase, cytoplasmic	Color2 [A=255, R=169, G=169, B=169]	1	4		14.1957	14.1327	14.1916	14.2931	14.3728	14.3669
	0.856056	0.0652968	Q5JTZ9	Q5JTZ9	SYAM_HUMAN	AARS2	Alanine--tRNA ligase, mitochondrial	Color2 [A=255, R=169, G=169, B=169]	1	4		14.8643	14.9633	14.9597	14.9676	14.9988	15.0169
	0.371937	-0.0620257	Q9BTE6;Q9BTE6-2;Q9BTE6-3	Q9BTE6;Q9BTE6-2;Q9BTE6-3	AASD1_HUMAN	AARSD1	Alanyl-tRNA editing protein Aarsd1	Color2 [A=255, R=169, G=169, B=169]	1	4		13.7917	13.7279	13.907	13.7127	13.8382	13.6897
	0.135594	-0.14558	Q4L235;Q4L235-2;Q4L235-3;Q4L235-4	Q4L235;Q4L235-2;Q4L235-3;Q4L235-4	ACSF4_HUMAN	AASDH	Beta-alanine-activating enzyme	Color2 [A=255, R=169, G=169, B=169]	1	4		11.9552	11.5406	12.1936	12.0796	12.1161	11.0571
	0.63589	-0.130279	Q9NRN7	Q9NRN7;Q9NRN7-2	ADPPT_HUMAN	AASDHPPT	L-aminoadipate-semialdehyde dehydrogenase-phosphopantetheinyl transferase	Color2 [A=255, R=169, G=169, B=169]	1	4		14.6273	14.6266	14.6925	14.5863	14.3407	14.6285
	0.0780837	0.0202579	Q9UDR5	Q9UDR5	AASS_HUMAN	AASS	Alpha-aminoadipic semialdehyde synthase, mitochondrial	Color2 [A=255, R=169, G=169, B=169]	1	4		13.7824	13.6401	13.5728	13.8195	13.6082	13.6284
	0.100518	0.0689526	Q9NY61	Q9NY61	AATF_HUMAN	AATF	Protein AATF	Color2 [A=255, R=169, G=169, B=169]	1	4		12.5785	12.0345	12.2868	12.0078	12.4491	12.6497
	0.354103	-0.812916	O75027;O75027-2	O75027;O75027-2;O75027-3	ABCB7_HUMAN	ABCB7	Iron-sulfur clusters transporter ABCB7, mitochondrial	Color2 [A=255, R=169, G=169, B=169]	1	4		10.6924	12.6673	12.9294	10.0004	11.8584	11.9914
	0.362106	0.296047	P33527;P33527-2;P33527-3;P33527-5;P33527-9	P33527;P33527-2;P33527-3;P33527-4;P33527-5;P33527-6;P33527-7;P33527-8;P33527-9	MRP1_HUMAN	ABCC1	Multidrug resistance-associated protein 1	Color2 [A=255, R=169, G=169, B=169]	1	4		10.0255	8.96301	9.36431	9.4649	9.84902	9.92702
	0.194661	0.10471	P28288	P28288;P28288-2	ABCD3_HUMAN	ABCD3	ATP-binding cassette sub-family D member 3	Color2 [A=255, R=169, G=169, B=169]	1	4		13.6453	13.3904	13.281	13.2828	13.4692	13.8789
	1.85847	-0.231067	P61221	P61221	ABCE1_HUMAN	ABCE1	ATP-binding cassette sub-family E member 1	Color2 [A=255, R=169, G=169, B=169]	1	4		14.2973	14.3704	14.2754	14.161	13.9982	14.0907
	0.281218	-0.043431	Q8NE71	Q8NE71;Q8NE71-2	ABCF1_HUMAN	ABCF1	ATP-binding cassette sub-family F member 1	Color2 [A=255, R=169, G=169, B=169]	1	4		15.8182	15.9236	15.8028	15.8624	15.7068	15.8451
	0.287741	0.0304858	Q9UG63;Q9UG63-2	Q9UG63;Q9UG63-2	ABCF2_HUMAN	ABCF2	ATP-binding cassette sub-family F member 2	Color2 [A=255, R=169, G=169, B=169]	1	4		16.6515	16.5541	16.5613	16.5936	16.5871	16.6776
	0.603771	-0.104663	Q9NUQ8	Q9NUQ8;Q9NUQ8-2	ABCF3_HUMAN	ABCF3	ATP-binding cassette sub-family F member 3	Color2 [A=255, R=169, G=169, B=169]	1	4		16.3844	16.2129	16.1517	16.1895	16.1681	16.0774
	0.198124	-0.215725	Q8NFV4;Q8NFV4-4	Q8NFV4;Q8NFV4-4;Q8NFV4-6	ABHDB_HUMAN	ABHD11	Protein ABHD11	Color2 [A=255, R=169, G=169, B=169]	1	4		12.6323	12.062	12.5953	12.5902	12.5905	11.4618
	0.518149	0.573609	Q96IU4	Q96IU4;Q96IU4-2	ABHEB_HUMAN	ABHD14B	Putative protein-lysine deacylase ABHD14B	Color2 [A=255, R=169, G=169, B=169]	1	4		10.2028	9.62848	10.7488	10.1764	10.6973	11.4272
	0.457805	-0.746684	Q5VST6	Q5VST6;Q5VST6-2	AB17B_HUMAN	ABHD17B	Alpha/beta hydrolase domain-containing protein 17B	Color2 [A=255, R=169, G=169, B=169]	1	4		9.6867	10.525	10.9517	10.7535	8.70609	9.46382
	0.95498	-0.374634	Q0P651;Q0P651-2;Q0P651-3;Q0P651-4	Q0P651;Q0P651-2;Q0P651-3;Q0P651-4	ABD18_HUMAN	ABHD18	Protein ABHD18	Color2 [A=255, R=169, G=169, B=169]	1	4		10.5564	10.6576	11.117	10.2971	10.3952	10.5148
	0.234111	-0.163826	Q8TB40	Q8TB40	ABHD4_HUMAN	ABHD4	(Lyso)-N-acylphosphatidylethanolamine lipase	Color2 [A=255, R=169, G=169, B=169]	1	4		12.1987	12.2265	12.3615	12.1154	12.5578	11.622
	0.827417	-2.51128	Q8WTS1	Q8WTS1	ABHD5_HUMAN	ABHD5	1-acylglycerol-3-phosphate O-acyltransferase ABHD5	Color2 [A=255, R=169, G=169, B=169]	1	4		13.7385	14.6056	14.4851	10.6817	14.5059	10.1077
	0.443637	0.146915	Q8IZP0;Q8IZP0-10;Q8IZP0-2;Q8IZP0-3;Q8IZP0-4;Q8IZP0-5;Q8IZP0-6;Q8IZP0-7;Q8IZP0-8;Q8IZP0-9	Q8IZP0;Q8IZP0-5;Q8IZP0-2;Q8IZP0-4;Q8IZP0-10;Q8IZP0-11;Q8IZP0-3;Q8IZP0-6;Q8IZP0-7;Q8IZP0-8;Q8IZP0-9	ABI1_HUMAN	ABI1	Abl interactor 1	Color2 [A=255, R=169, G=169, B=169]	1	4		13.6275	13.5509	13.9645	13.7339	13.9137	13.936
	0.203515	0.142563	Q9NYB9;Q9NYB9-2;Q9NYB9-4	Q9NYB9;Q9NYB9-2;Q9NYB9-3;Q9NYB9-4	ABI2_HUMAN	ABI2	Abl interactor 2	Color2 [A=255, R=169, G=169, B=169]	1	4		12.3467	12.5743	12.4832	12.0983	12.9631	12.7705
	0.285964	-0.094876	P42684;P42684-6	P42684;P42684-5;P42684-6;P42684-7;P42684-8	ABL2_HUMAN	ABL2	Tyrosine-protein kinase ABL2	Color2 [A=255, R=169, G=169, B=169]	1	4		13.9388	13.8397	13.9252	13.5544	13.875	13.9897
	0.250841	-0.115812	Q12979;Q12979-2;Q12979-4	P11274;Q12979;P11274-2;Q12979-2;Q12979-4	ABR_HUMAN	ABR	Active breakpoint cluster region-related protein	Color2 [A=255, R=169, G=169, B=169]	1	4		12.2985	12.8179	12.5211	12.531	12.2216	12.5374
	0.0186892	-0.0163406	Q15018	Q15018	ABRX2_HUMAN	ABRAXAS2	BRISC complex subunit Abraxas 2	Color2 [A=255, R=169, G=169, B=169]	1	4		11.9522	12.2105	11.8523	12.4201	12.0556	11.4903
	0.664312	0.261344	P09110	P09110	THIK_HUMAN	ACAA1	3-ketoacyl-CoA thiolase, peroxisomal	Color2 [A=255, R=169, G=169, B=169]	1	4		13.6339	13.1422	13.6854	13.737	13.6809	13.8276
	1.59695	-0.196944	P42765	P42765	THIM_HUMAN	ACAA2	3-ketoacyl-CoA thiolase, mitochondrial	Color2 [A=255, R=169, G=169, B=169]	1	4		13.6002	13.7035	13.5463	13.4852	13.3869	13.3871
	0.257178	-0.0189597	Q13085;Q13085-2;Q13085-4	Q13085;Q13085-2;Q13085-3;Q13085-4	ACACA_HUMAN	ACACA	Acetyl-CoA carboxylase 1	Color2 [A=255, R=169, G=169, B=169]	1	4		17.8697	17.8155	17.8902	17.8761	17.8303	17.812
	0.148734	-0.432026	O00763;O00763-2	O00763;O00763-2;O00763-3	ACACB_HUMAN	ACACB	Acetyl-CoA carboxylase 2	Color2 [A=255, R=169, G=169, B=169]	1	4		9.59039	9.48986	12.7438	10.403	10.2817	9.8433
	0.0731714	0.0262295	Q6JQN1;Q6JQN1-5	Q6JQN1;Q6JQN1-2;Q6JQN1-3;Q6JQN1-5	ACD10_HUMAN	ACAD10	Acyl-CoA dehydrogenase family member 10	Color2 [A=255, R=169, G=169, B=169]	1	4		12.5947	12.6766	12.852	12.5544	12.9011	12.7465
	0.233139	0.109405	Q709F0	Q709F0;Q709F0-3	ACD11_HUMAN	ACAD11	Acyl-CoA dehydrogenase family member 11	Color2 [A=255, R=169, G=169, B=169]	1	4		12.142	12.0354	11.7263	11.8866	12.0056	12.3398
	0.0367377	-0.0128202	Q9UKU7	Q9UKU7;Q9UKU7-2	ACAD8_HUMAN	ACAD8	Isobutyryl-CoA dehydrogenase, mitochondrial	Color2 [A=255, R=169, G=169, B=169]	1	4		13.6271	13.2497	13.5127	13.4493	13.5179	13.3838
	0.350688	-0.10161	Q9H845	Q9H845	ACAD9_HUMAN	ACAD9	Complex I assembly factor ACAD9, mitochondrial	Color2 [A=255, R=169, G=169, B=169]	1	4		13.8051	14.102	13.8107	13.8011	13.9267	13.6851
	0.197379	-0.0501213	P11310;P11310-2	P11310;P11310-2	ACADM_HUMAN	ACADM	Medium-chain specific acyl-CoA dehydrogenase, mitochondrial	Color2 [A=255, R=169, G=169, B=169]	1	4		16.9339	16.8251	16.7492	16.9154	16.8073	16.6351
	0.314961	-0.230748	P16219	P16219	ACADS_HUMAN	ACADS	Short-chain specific acyl-CoA dehydrogenase, mitochondrial	Color2 [A=255, R=169, G=169, B=169]	1	4		12.8071	12.963	13.0035	12.8558	12.124	13.1016
	0.19046	0.0359859	P45954	P45954;P45954-2	ACDSB_HUMAN	ACADSB	Short/branched chain specific acyl-CoA dehydrogenase, mitochondrial	Color2 [A=255, R=169, G=169, B=169]	1	4		15.7454	15.5991	15.5629	15.5825	15.736	15.6968
	0.0152631	0.018239	P49748;P49748-3	P49748;P49748-2;P49748-3	ACADV_HUMAN	ACADVL	Very long-chain specific acyl-CoA dehydrogenase, mitochondrial	Color2 [A=255, R=169, G=169, B=169]	1	4		10.5623	10.7692	11.1663	11.2064	10.1427	11.2034
	0.020184	0.00276025	Q15057	Q15057	ACAP2_HUMAN	ACAP2	Arf-GAP with coiled-coil, ANK repeat and PH domain-containing protein 2	Color2 [A=255, R=169, G=169, B=169]	1	4		13.7819	13.8543	13.7999	13.7478	13.8104	13.8862
	1.45015	0.275931	P24752	P24752;P24752-2	THIL_HUMAN	ACAT1	Acetyl-CoA acetyltransferase, mitochondrial	Color2 [A=255, R=169, G=169, B=169]	1	4		14.4988	14.4351	14.5705	14.7278	14.6718	14.9326
	0.0491071	-0.0340335	Q9BWD1;Q9BWD1-2	Q9BWD1;Q9BWD1-2	THIC_HUMAN	ACAT2	Acetyl-CoA acetyltransferase, cytosolic	Color2 [A=255, R=169, G=169, B=169]	1	4		14.2406	14.4476	14.0951	13.8951	14.1574	14.6287
	0.803573	0.221156	Q9H3P7	Q9H3P7	GCP60_HUMAN	ACBD3	Golgi resident protein GCP60	Color2 [A=255, R=169, G=169, B=169]	1	4		13.1305	12.802	12.9087	13.2597	13.0032	13.2417
	0.272912	-0.124133	Q9UKV3	Q9UKV3;Q9UKV3-5	ACINU_HUMAN	ACIN1	Apoptotic chromatin condensation inducer in the nucleus	Color2 [A=255, R=169, G=169, B=169]	1	4		13.956	14.4611	13.9161	14.0745	13.9849	13.9016
	0.563209	0.0679808	P53396	P53396;P53396-2	ACLY_HUMAN	ACLY	ATP-citrate synthase	Color2 [A=255, R=169, G=169, B=169]	1	4		15.3152	15.3243	15.2954	15.4096	15.2767	15.4524
	0.0295103	0.0107307	P21399	P21399	ACOHC_HUMAN	ACO1	Cytoplasmic aconitate hydratase	Color2 [A=255, R=169, G=169, B=169]	1	4		14.1117	14.4233	14.3191	14.4536	14.1852	14.2475
	1.8677	-0.234738	Q99798	Q99798	ACON_HUMAN	ACO2	Aconitate hydratase, mitochondrial	Color2 [A=255, R=169, G=169, B=169]	1	4		14.4022	14.5186	14.3715	14.2618	14.1557	14.1706
	1.17325	0.133858	Q9NPJ3;Q9NPJ3-2	Q9NPJ3;Q9NPJ3-2	ACO13_HUMAN	ACOT13	Acyl-coenzyme A thioesterase 13	Color2 [A=255, R=169, G=169, B=169]	1	4		14.6148	14.5483	14.4408	14.7001	14.6658	14.6395
	0.358313	0.0574252	O00154;O00154-4;O00154-6;O00154-7	O00154;O00154-4;O00154-2;O00154-3;O00154-5;O00154-6;O00154-7	BACH_HUMAN	ACOT7	Cytosolic acyl coenzyme A thioester hydrolase	Color2 [A=255, R=169, G=169, B=169]	1	4		17.1006	16.8827	16.9396	17.0037	17.0433	17.0482
	0.321839	-0.115256	O14734	O14734	ACOT8_HUMAN	ACOT8	Acyl-coenzyme A thioesterase 8	Color2 [A=255, R=169, G=169, B=169]	1	4		15.0573	14.9589	15.139	15.0434	14.6638	15.1021
	1.14153	-0.0950054	Q9Y305	Q9Y305;Q9Y305-2;Q9Y305-3;Q9Y305-4	ACOT9_HUMAN	ACOT9	Acyl-coenzyme A thioesterase 9, mitochondrial	Color2 [A=255, R=169, G=169, B=169]	1	4		15.3378	15.3901	15.3895	15.2138	15.2837	15.3349
	0.156544	0.138929	Q15067-2	Q15067;Q15067-2;Q15067-3	ACOX1_HUMAN	ACOX1	Isoform 2 of Peroxisomal acyl-coenzyme A oxidase 1	Color2 [A=255, R=169, G=169, B=169]	1	4		12.2591	11.5302	12.5797	12.4079	12.0275	12.3504
	1.48184	-1.0564	O15254;O15254-2	O15254;O15254-2	ACOX3_HUMAN	ACOX3	Peroxisomal acyl-coenzyme A oxidase 3	Color2 [A=255, R=169, G=169, B=169]	1	4		12.1667	11.4651	11.5348	11.1419	10.5173	10.3382
	0.0851523	-0.101888	P24666	P24666;P24666-4	PPAC_HUMAN	ACP1	Low molecular weight phosphotyrosine protein phosphatase	Color2 [A=255, R=169, G=169, B=169]	1	4		11.7433	11.3881	12.6921	12.0464	11.5056	11.9658
	0.634375	0.58885	Q96CM8;Q96CM8-2;Q96CM8-3	Q96CM8;Q96CM8-2;Q96CM8-3;Q96CM8-4	ACSF2_HUMAN	ACSF2	Medium-chain acyl-CoA ligase ACSF2, mitochondrial	Color2 [A=255, R=169, G=169, B=169]	1	4		11.3054	10.1192	11.255	11.2688	11.3858	11.7915
	0.908992	-0.316966	Q4G176	Q4G176	ACSF3_HUMAN	ACSF3	Malonate--CoA ligase ACSF3, mitochondrial	Color2 [A=255, R=169, G=169, B=169]	1	4		10.3148	10.172	10.4268	10.107	9.69881	10.1569
	0.485622	-0.055686	P33121	P33121;P33121-2	ACSL1_HUMAN	ACSL1	Long-chain-fatty-acid--CoA ligase 1	Color2 [A=255, R=169, G=169, B=169]	1	4		14.6627	14.6176	14.7445	14.5578	14.6277	14.6722
	1.34406	-0.12773	O95573	O95573	ACSL3_HUMAN	ACSL3	Fatty acid CoA ligase Acsl3	Color2 [A=255, R=169, G=169, B=169]	1	4		14.4907	14.6326	14.5187	14.4365	14.4189	14.4034
	0.208735	-0.026221	O60488;O60488-2	O60488;O60488-2	ACSL4_HUMAN	ACSL4	Long-chain-fatty-acid--CoA ligase 4	Color2 [A=255, R=169, G=169, B=169]	1	4		16.182	16.2849	16.2715	16.2672	16.1484	16.2442
	0.378774	-0.530578	Q9NUB1;Q9NUB1-2;Q9NUB1-3	Q9NUB1;Q9NUB1-2;Q9NUB1-3	ACS2L_HUMAN	ACSS1	Acetyl-coenzyme A synthetase 2-like, mitochondrial	Color2 [A=255, R=169, G=169, B=169]	1	4		11.0195	10.1704	10.1195	10.2522	8.90064	10.5649
	1.6978	0.327397	P68133	P68032;P68133	ACTS_HUMAN	ACTA1	Actin, alpha skeletal muscle	Color2 [A=255, R=169, G=169, B=169]	1	4		18.1949	18.2008	18.2612	18.4127	18.5225	18.7038
	0.256099	0.0316792	P60709;P63261	P60709;P63261	ACTB_HUMAN;ACTG_HUMAN	ACTB;ACTG1	Actin, cytoplasmic 1	Color2 [A=255, R=169, G=169, B=169]	1	4		21.9183	21.9735	21.8817	21.9523	22.0296	21.8867
	0.0730462	-0.70885	Q562R1	Q562R1	ACTBL_HUMAN	ACTBL2	Beta-actin-like protein 2	Color2 [A=255, R=169, G=169, B=169]	1	4		10.5659	10.2627	16.9406	17.062	8.66068	9.92004
	0.424883	-0.145042	O96019	O96019;O96019-2	ACL6A_HUMAN	ACTL6A	Actin-like protein 6A	Color2 [A=255, R=169, G=169, B=169]	1	4		13.4023	13.4027	13.3296	13.3226	12.9519	13.425
	0.0123204	0.00218296	Q9H568	Q9H568	ACTL8_HUMAN	ACTL8	Actin-like protein 8	Color2 [A=255, R=169, G=169, B=169]	1	4		15.2112	15.4047	15.3208	15.2909	15.3473	15.305
	0.281006	-0.0953808	Q5BKX5	Q5BKX5;Q5BKX5-3	ACTMP_HUMAN	ACTMAP	Actin maturation protease	Color2 [A=255, R=169, G=169, B=169]	1	4		14.6365	14.3447	14.4291	14.2665	14.2718	14.5859
	0.0619784	-0.0337702	P12814;P12814-2;P12814-3;P12814-4	P12814;P12814-2;P12814-3;P12814-4	ACTN1_HUMAN	ACTN1	Alpha-actinin-1	Color2 [A=255, R=169, G=169, B=169]	1	4		13.8219	13.991	14.1091	13.6071	14.0491	14.1644
	0.630088	-0.249485	O43707	O43707;O43707-2	ACTN4_HUMAN	ACTN4	Alpha-actinin-4	Color2 [A=255, R=169, G=169, B=169]	1	4		14.2448	14.2557	14.2105	14.2299	13.6409	14.0917
	0.458501	-0.157427	P61163	P61163	ACTZ_HUMAN	ACTR1A	Alpha-centractin	Color2 [A=255, R=169, G=169, B=169]	1	4		13.4614	13.804	13.7015	13.6666	13.5311	13.2971
	0.174678	-0.0490341	P42025	P42025	ACTY_HUMAN	ACTR1B	Beta-centractin	Color2 [A=255, R=169, G=169, B=169]	1	4		13.5979	13.3188	13.3344	13.3045	13.3201	13.4794
	0.855752	-0.0937602	P61160	P61160;P61160-2	ARP2_HUMAN	ACTR2	Actin-related protein 2	Color2 [A=255, R=169, G=169, B=169]	1	4		16.5589	16.4978	16.4971	16.4879	16.4511	16.3334
	0.335234	-0.0882257	P61158	P61158	ARP3_HUMAN	ACTR3	Actin-related protein 3	Color2 [A=255, R=169, G=169, B=169]	1	4		14.1115	14.1217	14.0106	14.1834	13.8313	13.9645
	0.311143	-0.225944	Q9H9F9	Q9H9F9	ARP5_HUMAN	ACTR5	Actin-related protein 5	Color2 [A=255, R=169, G=169, B=169]	1	4		12.3505	11.9243	11.9018	11.4722	11.6936	12.333
	0.251674	-0.131	Q9GZN1	Q9GZN1	ARP6_HUMAN	ACTR6	Actin-related protein 6	Color2 [A=255, R=169, G=169, B=169]	1	4		11.9561	11.6607	11.6207	11.9465	11.3403	11.5577
	0.441151	0.288531	Q9H981	Q9H981;Q9H981-2;Q9H981-3	ARP8_HUMAN	ACTR8	Actin-related protein 8	Color2 [A=255, R=169, G=169, B=169]	1	4		13.4116	12.7343	13.037	13.6198	12.9565	13.4723
	0.0347986	0.149817	O14672	O14672	ADA10_HUMAN	ADAM10	Disintegrin and metalloproteinase domain-containing protein 10	Color2 [A=255, R=169, G=169, B=169]	1	4		13.2787	12.5444	9.02368	10.6043	12.7651	11.9268
	1.29465	0.459184	Q13444;Q13444-10;Q13444-12;Q13444-13;Q13444-2;Q13444-3;Q13444-4;Q13444-5;Q13444-6;Q13444-7;Q13444-8;Q13444-9	Q13444;Q13444-2;Q13444-10;Q13444-12;Q13444-13;Q13444-3;Q13444-4;Q13444-5;Q13444-6;Q13444-7;Q13444-8;Q13444-9	ADA15_HUMAN	ADAM15	Disintegrin and metalloproteinase domain-containing protein 15	Color2 [A=255, R=169, G=169, B=169]	1	4		11.1986	11.5739	11.1258	11.71	11.9356	11.6302
	0.942888	1.66629	O75077-3	O75077;O75077-2;O75077-3	ADA23_HUMAN	ADAM23	Isoform Gamma of Disintegrin and metalloproteinase domain-containing protein 23	Color2 [A=255, R=169, G=169, B=169]	1	4		9.96656	10.1009	9.53848	10.3768	11.1354	13.0927
	0.251133	0.0307134	Q6NVV9-7	Q6NVV9-7	ADAM5_HUMAN	ADAM5	Isoform 7 of Putative disintegrin and metalloproteinase domain-containing protein 5	Color2 [A=255, R=169, G=169, B=169]	1	4		15.9106	15.8502	15.818	15.923	15.8104	15.9375
	0.0307501	0.0228141	Q13443	Q13443;Q13443-2	ADAM9_HUMAN	ADAM9	Disintegrin and metalloproteinase domain-containing protein 9	Color2 [A=255, R=169, G=169, B=169]	1	4		9.31597	9.47055	9.52873	9.22238	9.21673	9.94458
	0.130441	0.037398	Q76LX8;Q76LX8-2	Q76LX8;Q76LX8-2	ATS13_HUMAN	ADAMTS13	A disintegrin and metalloproteinase with thrombospondin motifs 13	Color2 [A=255, R=169, G=169, B=169]	1	4		12.8233	12.9785	12.6747	12.7464	12.9148	12.9276
	0.337463	0.0465705	P55265;P55265-4;P55265-5	P55265;P55265-2;P55265-3;P55265-4;P55265-5	DSRAD_HUMAN	ADAR	Double-stranded RNA-specific adenosine deaminase	Color2 [A=255, R=169, G=169, B=169]	1	4		14.915	14.7183	14.8169	14.8546	14.8629	14.8724
	2.05243	0.0888481	P35611;P35611-2;P35611-3;P35611-6	P35611;P35611-2;P35611-3;P35611-4;P35611-5;P35611-6	ADDA_HUMAN	ADD1	Alpha-adducin	Color2 [A=255, R=169, G=169, B=169]	1	4		15.8823	15.8928	15.8972	15.947	15.9821	16.0096
	1.32781	0.141726	P35612	P35612;P35612-2;P35612-3;P35612-4;P35612-8;P35612-9	ADDB_HUMAN	ADD2	Beta-adducin	Color2 [A=255, R=169, G=169, B=169]	1	4		14.9198	14.8285	14.8869	14.9431	15.0885	15.0288
	1.03714	0.119478	Q9UEY8;Q9UEY8-2	Q9UEY8;Q9UEY8-2	ADDG_HUMAN	ADD3	Gamma-adducin	Color2 [A=255, R=169, G=169, B=169]	1	4		14.4294	14.2875	14.3165	14.4024	14.5128	14.4766
	0.027175	0.00448926	P11766	P11766	ADHX_HUMAN	ADH5	Alcohol dehydrogenase class-3	Color2 [A=255, R=169, G=169, B=169]	1	4		15.8811	15.9974	15.9486	15.9906	15.9911	15.8589
	0.557638	-0.107522	Q9GZN8;Q9GZN8-2	Q9GZN8;Q9GZN8-2	ADSSP_HUMAN	ADISSP	Adipose-secreted signaling protein	Color2 [A=255, R=169, G=169, B=169]	1	4		14.4701	14.3049	14.3194	14.1973	14.1831	14.3915
	0.0214153	-0.0126479	P55263;P55263-2;P55263-3;P55263-4	P55263;P55263-2;P55263-3;P55263-4	ADK_HUMAN	ADK	Adenosine kinase	Color2 [A=255, R=169, G=169, B=169]	1	4		11.6203	11.9885	11.4083	11.8309	11.4834	11.665
	1.23062	0.214083	Q9H2P0	Q9H2P0	ADNP_HUMAN	ADNP	Activity-dependent neuroprotector homeobox protein	Color2 [A=255, R=169, G=169, B=169]	1	4		13.8019	13.6681	13.7724	13.8269	13.9904	14.0674
	0.0959925	0.151844	Q9BRR6;Q9BRR6-2	Q9BRR6;Q9BRR6-2;Q9BRR6-3;Q9BRR6-4	ADPGK_HUMAN	ADPGK	ADP-dependent glucokinase	Color2 [A=255, R=169, G=169, B=169]	1	4		10.0436	9.07887	10.2412	10.7897	9.33645	9.69301
	0.12777	-0.167692	Q16186	Q16186	ADRM1_HUMAN	ADRM1	Proteasomal ubiquitin receptor ADRM1	Color2 [A=255, R=169, G=169, B=169]	1	4		12.4865	13.2344	13.0255	11.9041	13.0585	13.2808
	1.12511	-0.214859	P30566	P30566	PUR8_HUMAN	ADSL	Adenylosuccinate lyase	Color2 [A=255, R=169, G=169, B=169]	1	4		13.4133	13.5467	13.3894	13.2733	13.0896	13.3418
	1.65284	-0.0967525	P30520	P30520	PURA2_HUMAN	ADSS2	Adenylosuccinate synthetase isozyme 2	Color2 [A=255, R=169, G=169, B=169]	1	4		14.328	14.3072	14.3153	14.2161	14.2669	14.1771
	1.69567	0.283962	Q6ZN18;Q6ZN18-2	Q6ZN18;Q6ZN18-2;Q6ZN18-3	AEBP2_HUMAN	AEBP2	Zinc finger protein AEBP2	Color2 [A=255, R=169, G=169, B=169]	1	4		11.774	11.6891	11.6268	11.8579	12.0183	12.0656
	0.372021	0.382548	Q8N556;Q8N556-2	Q8N556;Q8N556-2	AFAP1_HUMAN	AFAP1	Actin filament-associated protein 1	Color2 [A=255, R=169, G=169, B=169]	1	4		13.3254	12.832	11.9709	12.866	13.4246	12.9854
	1.01583	-0.199359	P55196;P55196-5	P55196;P55196-1;P55196-2;P55196-3;P55196-5;P55196-6	AFAD_HUMAN	AFDN	Afadin	Color2 [A=255, R=169, G=169, B=169]	1	4		13.2803	13.125	13.097	13.0535	12.8242	13.0265
	1.13849	-0.408677	Q9UHB7	Q9UHB7	AFF4_HUMAN	AFF4	AF4/FMR2 family member 4	Color2 [A=255, R=169, G=169, B=169]	1	4		10.6871	10.254	10.4891	10.0751	9.86839	10.2606
	0.065156	0.0125167	Q8WV93	Q8WV93	AFG1L_HUMAN	AFG1L	AFG1-like ATPase	Color2 [A=255, R=169, G=169, B=169]	1	4		13.7046	13.5806	13.4786	13.572	13.6163	13.6132
	1.92065	-0.144945	Q8NB90	Q8NB90;Q8NB90-2;Q8NB90-3	AFG2A_HUMAN	AFG2A	ATPase family gene 2 protein homolog A	Color2 [A=255, R=169, G=169, B=169]	1	4		13.5145	13.4445	13.461	13.3503	13.3576	13.2773
	0.680367	-0.164401	Q9BVQ7	Q9BVQ7;Q9BVQ7-2	AFG2B_HUMAN	AFG2B	ATPase family gene 2 protein homolog B	Color2 [A=255, R=169, G=169, B=169]	1	4		12.7643	12.8631	12.5374	12.6474	12.559	12.4653
	0.216724	-0.0771278	Q9Y4W6	Q9Y4W6	AFG32_HUMAN	AFG3L2	AFG3-like protein 2	Color2 [A=255, R=169, G=169, B=169]	1	4		13.8221	13.4299	13.5457	13.4969	13.6628	13.4066
	0.48184	0.103276	P02771	P02771	FETA_HUMAN	AFP	Alpha-fetoprotein	Color2 [A=255, R=169, G=169, B=169]	1	4		16.9542	16.8307	16.8544	16.8263	17.0038	17.119
	0.0404475	0.0166229	Q6ULP2;Q6ULP2-6;Q6ULP2-8;Q6ULP2-9	Q6ULP2;Q6ULP2-6;Q6ULP2-8;Q6ULP2-9	AFTIN_HUMAN	AFTPH	Aftiphilin	Color2 [A=255, R=169, G=169, B=169]	1	4		12.351	12.1023	11.9277	12.1605	12.0206	12.2498
	1.09221	0.694462	Q9UPQ3;Q9UPQ3-2	Q9UPQ3;Q9UPQ3-2	AGAP1_HUMAN	AGAP1	Arf-GAP with GTPase, ANK repeat and PH domain-containing protein 1	Color2 [A=255, R=169, G=169, B=169]	1	4		10.8346	10.6679	11.0842	11.8207	11.01	11.8394
	0.229963	-0.0465692	Q96P47;Q96P47-2;Q96P47-4	Q96P47;Q9UPQ3;Q96P47-2;Q96P47-3;Q96P47-4;Q96P47-6;Q9UPQ3-2;Q9UPQ3-3	AGAP3_HUMAN	AGAP3	Arf-GAP with GTPase, ANK repeat and PH domain-containing protein 3	Color2 [A=255, R=169, G=169, B=169]	1	4		13.7846	13.7424	13.6218	13.5595	13.6732	13.7764
	0.216402	-0.103562	P52594;P52594-2;P52594-3;P52594-4	P52594;P52594-2;P52594-3;P52594-4	AGFG1_HUMAN	AGFG1	Arf-GAP domain and FG repeat-containing protein 1	Color2 [A=255, R=169, G=169, B=169]	1	4		13.0554	13.4714	13.1564	12.9234	13.0614	13.3877
	0.925626	0.59801	O95081	O95081;O95081-2	AGFG2_HUMAN	AGFG2	Arf-GAP domain and FG repeat-containing protein 2	Color2 [A=255, R=169, G=169, B=169]	1	4		12.1125	11.9527	11.5104	12.3292	12.1152	12.9252
	1.2192	-0.389215	Q53H12	Q53H12	AGK_HUMAN	AGK	Acylglycerol kinase, mitochondrial	Color2 [A=255, R=169, G=169, B=169]	1	4		12.0871	11.9254	11.6255	11.5134	11.589	11.3679
	0.0605576	0.018431	P35573	P35573;P35573-2;P35573-3	GDE_HUMAN	AGL	Glycogen debranching enzyme	Color2 [A=255, R=169, G=169, B=169]	1	4		13.4048	13.6919	13.3885	13.5757	13.445	13.5198
	0.326094	-0.0519721	Q9UKV8	Q9H9G7;Q9UKV8;Q9UL18;Q9H9G7-2;Q9UKV8-2	AGO2_HUMAN	AGO2	Protein argonaute-2	Color2 [A=255, R=169, G=169, B=169]	1	4		13.2354	13.3353	13.1993	13.119	13.1985	13.2966
	0.0286054	-0.00733757	O00116	O00116	ADAS_HUMAN	AGPS	Alkyldihydroxyacetonephosphate synthase, peroxisomal	Color2 [A=255, R=169, G=169, B=169]	1	4		15.0159	15.09	15.0086	15.0714	15.1485	14.8726
	0.0770916	0.00749334	O00468-6	O00468;O00468-2;O00468-3;O00468-4;O00468-5;O00468-6;O00468-7	AGRIN_HUMAN	AGRN	Isoform 6 of Agrin	Color2 [A=255, R=169, G=169, B=169]	1	4		14.6645	14.5931	14.5668	14.5843	14.6461	14.6164
	0.177665	0.0237815	Q9UPW5	Q9UPW5;Q9UPW5-2;Q9UPW5-3	CBPC1_HUMAN	AGTPBP1	Cytosolic carboxypeptidase 1	Color2 [A=255, R=169, G=169, B=169]	1	4		14.0892	13.9989	14.0703	14.1262	14.1121	13.9915
	0.403244	0.0583518	Q8WYP5;Q8WYP5-2;Q8WYP5-3	Q8WYP5;Q8WYP5-2;Q8WYP5-3	ELYS_HUMAN	AHCTF1	Protein ELYS	Color2 [A=255, R=169, G=169, B=169]	1	4		12.3911	12.3962	12.3438	12.5513	12.3584	12.3965
	0.14314	-0.0318429	P23526	P23526;P23526-2	SAHH_HUMAN	AHCY	Adenosylhomocysteinase	Color2 [A=255, R=169, G=169, B=169]	1	4		14.7184	14.8718	14.5951	14.7348	14.6665	14.6886
	0.252139	0.0590172	O43865	O43865	SAHH2_HUMAN	AHCYL1	S-adenosylhomocysteine hydrolase-like protein 1	Color2 [A=255, R=169, G=169, B=169]	1	4		16.7844	16.7693	16.8839	16.9	17.0035	16.7111
	3.22958	0.491705	Q96HN2;Q96HN2-2	Q96HN2;Q96HN2-2;Q96HN2-3;Q96HN2-4	SAHH3_HUMAN	AHCYL2	Adenosylhomocysteinase 3	Color2 [A=255, R=169, G=169, B=169]	1	4		12.6514	12.6914	12.7053	13.244	13.0847	13.1946
	1.1878	0.229188	Q09666	Q09666	AHNK_HUMAN	AHNAK	Neuroblast differentiation-associated protein AHNAK	Color2 [A=255, R=169, G=169, B=169]	1	4		16.2163	15.937	16.0196	16.3375	16.3081	16.2149
	0.659184	-0.0652644	O95433	O95433;O95433-2	AHSA1_HUMAN	AHSA1	Activator of 90 kDa heat shock protein ATPase homolog 1	Color2 [A=255, R=169, G=169, B=169]	1	4		18.4063	18.3742	18.3587	18.3826	18.2361	18.3247
	0.649406	0.222331	P02765	P02765	FETUA_HUMAN	AHSG	Alpha-2-HS-glycoprotein	Color2 [A=255, R=169, G=169, B=169]	1	4		16.3689	15.9423	16.1877	16.2025	16.4874	16.476
	2.20434	-1.98454	Q96BJ3	Q96BJ3;Q96BJ3-3	AIDA_HUMAN	AIDA	Axin interactor, dorsalization-associated protein	Color2 [A=255, R=169, G=169, B=169]	1	4		12.9771	12.9186	12.6613	10.7932	11.5331	10.2771
	0.488712	-0.11175	O95831	O95831;O95831-3;O95831-5;O95831-2	AIFM1_HUMAN	AIFM1	Apoptosis-inducing factor 1, mitochondrial	Color2 [A=255, R=169, G=169, B=169]	1	4		15.7713	16.0157	15.7467	15.8083	15.7531	15.6371
	0.0229472	-0.015165	Q9BRQ8	Q9BRQ8;Q9BRQ8-2	FSP1_HUMAN	AIFM2	Ferroptosis suppressor protein 1	Color2 [A=255, R=169, G=169, B=169]	1	4		12.885	13.6427	13.3049	13.2349	13.2363	13.3158
	0.77804	0.159859	Q12904;Q12904-2	Q12904;Q12904-2	AIMP1_HUMAN	AIMP1	Aminoacyl tRNA synthase complex-interacting multifunctional protein 1	Color2 [A=255, R=169, G=169, B=169]	1	4		15.1772	14.8764	15.091	15.2584	15.151	15.2148
	0.389906	0.162126	Q13155	Q13155;Q13155-2	AIMP2_HUMAN	AIMP2	Aminoacyl tRNA synthase complex-interacting multifunctional protein 2	Color2 [A=255, R=169, G=169, B=169]	1	4		15.1748	15.0551	15.5266	15.2564	15.3772	15.6092
	0.0206028	-0.0455751	Q13155-2	Q13155-2	AIMP2_HUMAN	AIMP2	Isoform 2 of Aminoacyl tRNA synthase complex-interacting multifunctional protein 2	Color2 [A=255, R=169, G=169, B=169]	1	4		10.0014	10.6317	8.20316	9.79593	9.50261	9.40102
	0.158263	-0.0415611	O00170	O00170	AIP_HUMAN	AIP	AH receptor-interacting protein	Color2 [A=255, R=169, G=169, B=169]	1	4		15.9281	15.7255	15.929	15.7208	15.7789	15.9583
	0.451202	-0.130715	Q96IF1	Q96IF1	AJUBA_HUMAN	AJUBA	LIM domain-containing protein ajuba	Color2 [A=255, R=169, G=169, B=169]	1	4		12.3983	12.4657	12.188	12.0359	12.3292	12.2948
	0.282722	0.122211	P54819;P54819-2	P54819;P54819-2;P54819-3;P54819-4;P54819-5;P54819-6	KAD2_HUMAN	AK2	Adenylate kinase 2, mitochondrial	Color2 [A=255, R=169, G=169, B=169]	1	4		14.1263	14.0752	14.2453	14.0993	14.1096	14.6045
	1.76062	-0.161416	Q9UIJ7	Q9UIJ7;Q9UIJ7-2;Q9UIJ7-3	KAD3_HUMAN	AK3	GTP:AMP phosphotransferase AK3, mitochondrial	Color2 [A=255, R=169, G=169, B=169]	1	4		14.5906	14.5221	14.6005	14.3727	14.3806	14.4757
	0.435836	-0.120152	P27144	P27144	KAD4_HUMAN	AK4	Adenylate kinase 4, mitochondrial	Color2 [A=255, R=169, G=169, B=169]	1	4		14.5737	14.5885	14.4158	14.3032	14.2997	14.6146
	0.664414	0.167665	Q9Y3D8	Q9Y3D8;Q9Y3D8-2	KAD6_HUMAN	AK6	Adenylate kinase isoenzyme 6	Color2 [A=255, R=169, G=169, B=169]	1	4		16.2578	16.4502	16.4218	16.3504	16.6241	16.6582
	0.221167	-0.162625	Q96M32	Q96M32	KAD7_HUMAN	AK7	Adenylate kinase 7	Color2 [A=255, R=169, G=169, B=169]	1	4		12.3492	12.2357	12.0878	12.284	12.389	11.5118
	0.365585	0.1101	Q92667	Q92667	AKAP1_HUMAN	AKAP1	A-kinase anchor protein 1, mitochondrial	Color2 [A=255, R=169, G=169, B=169]	1	4		13.5793	13.3104	13.7008	13.5827	13.5977	13.7404
	1.51159	0.117858	O43572	O43572	AKA10_HUMAN	AKAP10	A-kinase anchor protein 10, mitochondrial	Color2 [A=255, R=169, G=169, B=169]	1	4		14.2724	14.2026	14.1566	14.3083	14.3244	14.3524
	0.314129	0.201298	Q02952	Q02952;Q02952-2;Q02952-3	AKA12_HUMAN	AKAP12	A-kinase anchor protein 12	Color2 [A=255, R=169, G=169, B=169]	1	4		12.8922	12.4249	12.0352	12.5852	12.5495	12.8213
	0.825692	-0.221597	Q12802;Q12802-2;Q12802-4	Q12802;Q12802-2;Q12802-4	AKP13_HUMAN	AKAP13	A-kinase anchor protein 13	Color2 [A=255, R=169, G=169, B=169]	1	4		12.7978	13.2003	13.0067	12.8453	12.7994	12.6953
	0.438512	0.225791	Q02040;Q02040-2;Q02040-3	Q02040;Q02040-3;Q02040-2	AK17A_HUMAN	AKAP17A	A-kinase anchor protein 17A	Color2 [A=255, R=169, G=169, B=169]	1	4		10.9165	10.9852	11.5834	11.4742	11.2662	11.422
	0.400422	-0.194636	O43823	O43823	AKAP8_HUMAN	AKAP8	A-kinase anchor protein 8	Color2 [A=255, R=169, G=169, B=169]	1	4		12.7851	12.2996	12.1101	12.2596	12.1169	12.2343
	0.707442	-0.085892	Q9ULX6	Q9ULX6	AKP8L_HUMAN	AKAP8L	A-kinase anchor protein 8-like	Color2 [A=255, R=169, G=169, B=169]	1	4		13.565	13.5392	13.6867	13.4478	13.5408	13.5446
	0.0204047	0.00311375	Q99996;Q99996-3;Q99996-6	Q99996;Q99996-3;Q99996-1;Q99996-4;Q99996-5;Q99996-6	AKAP9_HUMAN	AKAP9	A-kinase anchor protein 9	Color2 [A=255, R=169, G=169, B=169]	1	4		13.8986	13.753	13.7421	13.7884	13.806	13.8086
	0.573498	-0.239405	P14550	P14550	AK1A1_HUMAN	AKR1A1	Aldo-keto reductase family 1 member A1	Color2 [A=255, R=169, G=169, B=169]	1	4		11.8515	11.8846	11.3683	11.5455	11.2987	11.542
	0.0990186	-0.0938152	P15121	P15121	ALDR_HUMAN	AKR1B1	Aldo-keto reductase family 1 member B1	Color2 [A=255, R=169, G=169, B=169]	1	4		13.9171	14.8775	13.9069	14.3303	14.1363	13.9535
	0.0462602	0.031098	O43488	O43488	ARK72_HUMAN	AKR7A2	Aflatoxin B1 aldehyde reductase member 2	Color2 [A=255, R=169, G=169, B=169]	1	4		14.623	14.4129	14.9013	14.5427	14.4521	15.0357
	0.807248	0.131817	P31749	P31749;P31749-2	AKT1_HUMAN	AKT1	RAC-alpha serine/threonine-protein kinase	Color2 [A=255, R=169, G=169, B=169]	1	4		12.7321	12.5894	12.7189	12.7616	12.7423	12.932
	0.414163	0.305243	Q96B36;Q96B36-2;Q96B36-3	Q96B36;Q96B36-2;Q96B36-3	AKTS1_HUMAN	AKT1S1	Proline-rich AKT1 substrate 1	Color2 [A=255, R=169, G=169, B=169]	1	4		9.30982	10.1004	9.83073	10.3415	10.1731	9.64201
	0.0986588	-0.0377261	P31751	P31751;P31751-2	AKT2_HUMAN	AKT2	RAC-beta serine/threonine-protein kinase	Color2 [A=255, R=169, G=169, B=169]	1	4		13.244	13.048	12.9353	12.9425	12.9273	13.2443
	0.023223	0.0461149	Q9H8T0;Q9H8T0-2	Q9H8T0;Q9H8T0-2	AKTIP_HUMAN	AKTIP	AKT-interacting protein	Color2 [A=255, R=169, G=169, B=169]	1	4		9.49339	11.4947	10.8166	10.3216	10.3577	11.2638
	0.0701099	0.0212539	P13196	P13196	HEM1_HUMAN	ALAS1	5-aminolevulinate synthase, non-specific, mitochondrial	Color2 [A=255, R=169, G=169, B=169]	1	4		13.0911	13.2431	12.9219	13.0053	13.1719	13.1426
	0.0880359	-0.0598876	P02768	P02768	ALBU_HUMAN	ALB	Albumin	Color2 [A=255, R=169, G=169, B=169]	1	4		21.554	21.1727	21.026	21.0802	21.5493	20.9434
	0.36205	-0.154666	Q13740;Q13740-2	Q13740;Q13740-2;Q13740-3	CD166_HUMAN	ALCAM	CD166 antigen	Color2 [A=255, R=169, G=169, B=169]	1	4		11.9325	11.6608	11.4672	11.4707	11.7574	11.3685
	0.807958	-0.733659	Q8IZ83;Q8IZ83-3	Q8IZ83;Q8IZ83-2;Q8IZ83-3	A16A1_HUMAN	ALDH16A1	Aldehyde dehydrogenase family 16 member A1	Color2 [A=255, R=169, G=169, B=169]	1	4		11.0604	11.0455	11.048	11.0865	9.64026	10.2262
	0.677524	0.0418599	P54886;P54886-2	P54886;P54886-2	P5CS_HUMAN	ALDH18A1	Delta-1-pyrroline-5-carboxylate synthase	Color2 [A=255, R=169, G=169, B=169]	1	4		19.7474	19.6582	19.7271	19.7514	19.7666	19.7402
	0.54178	0.106245	O94788;O94788-2	O94788;O94788-2;O94788-3;O94788-4	AL1A2_HUMAN	ALDH1A2	Retinal dehydrogenase 2	Color2 [A=255, R=169, G=169, B=169]	1	4		13.4981	13.7421	13.5391	13.6549	13.6587	13.7845
	0.352307	-0.247387	P47895	P47895	AL1A3_HUMAN	ALDH1A3	Retinaldehyde dehydrogenase 3	Color2 [A=255, R=169, G=169, B=169]	1	4		12.3797	11.8146	12.5319	12.0292	11.6431	12.3117
	0.370648	-0.0670617	P30837	P30837	AL1B1_HUMAN	ALDH1B1	Aldehyde dehydrogenase X, mitochondrial	Color2 [A=255, R=169, G=169, B=169]	1	4		14.5191	14.5243	14.4356	14.2953	14.4474	14.5352
	1.38618	0.515927	Q3SY69	Q3SY69	AL1L2_HUMAN	ALDH1L2	Mitochondrial 10-formyltetrahydrofolate dehydrogenase	Color2 [A=255, R=169, G=169, B=169]	1	4		10.7328	10.9051	11.1988	11.2636	11.4856	11.6352
	0.0393003	0.0190137	P30838	P30838	AL3A1_HUMAN	ALDH3A1	Aldehyde dehydrogenase, dimeric NADP-preferring	Color2 [A=255, R=169, G=169, B=169]	1	4		13.2068	12.8798	13.0827	13.0291	12.8702	13.3271
	1.23959	0.125232	P51648;P51648-2	P51648;P51648-2	AL3A2_HUMAN	ALDH3A2	Aldehyde dehydrogenase family 3 member A2	Color2 [A=255, R=169, G=169, B=169]	1	4		13.7845	13.6556	13.7755	13.8181	13.8834	13.8898
	0.334319	0.104148	P30038	P30038;P30038-2;P30038-3	AL4A1_HUMAN	ALDH4A1	Delta-1-pyrroline-5-carboxylate dehydrogenase, mitochondrial	Color2 [A=255, R=169, G=169, B=169]	1	4		14.5743	14.416	14.5984	14.4851	14.5559	14.8602
	0.217117	-0.287018	P51649;P51649-2	P51649;P51649-2	SSDH_HUMAN	ALDH5A1	Succinate-semialdehyde dehydrogenase, mitochondrial	Color2 [A=255, R=169, G=169, B=169]	1	4		10.682	11.2756	9.73956	10.1518	10.7682	9.91607
	0.39381	0.0328795	Q02252	Q02252	MMSA_HUMAN	ALDH6A1	Methylmalonate-semialdehyde/malonate-semialdehyde dehydrogenase [acylating], mitochondrial	Color2 [A=255, R=169, G=169, B=169]	1	4		15.8456	15.913	15.8199	15.8494	15.908	15.9197
	0.926657	0.120956	P49419-2	P49419;P49419-2;P49419-4	AL7A1_HUMAN	ALDH7A1	Isoform 2 of Alpha-aminoadipic semialdehyde dehydrogenase	Color2 [A=255, R=169, G=169, B=169]	1	4		16.6988	16.5124	16.5989	16.6741	16.7255	16.7734
	0.489423	-0.101198	P49189	P49189;P49189-2;P49189-3	AL9A1_HUMAN	ALDH9A1	4-trimethylaminobutyraldehyde dehydrogenase	Color2 [A=255, R=169, G=169, B=169]	1	4		13.9176	14.161	13.9294	13.8254	13.9736	13.9055
	1.11267	-0.396975	P04075	P04075;P09972;P04075-2	ALDOA_HUMAN	ALDOA	Fructose-bisphosphate aldolase A	Color2 [A=255, R=169, G=169, B=169]	1	4		14.602	14.9462	14.4693	14.184	14.1887	14.4538
	0.194928	0.0465428	Q9BT22	Q9BT22;Q9BT22-2	ALG1_HUMAN	ALG1	Chitobiosyldiphosphodolichol beta-mannosyltransferase	Color2 [A=255, R=169, G=169, B=169]	1	4		12.5947	12.6819	12.4158	12.5452	12.7033	12.5835
	0.144372	0.175486	Q9NP73;Q9NP73-3	Q9NP73;Q9NP73-4;Q9NP73-3	ALG13_HUMAN	ALG13	Putative bifunctional UDP-N-acetylglucosamine transferase and deubiquitinase ALG13	Color2 [A=255, R=169, G=169, B=169]	1	4		9.75521	11.0034	10.8541	10.7274	10.3237	11.0881
	0.158457	-0.0321178	Q13686	Q13686	ALKB1_HUMAN	ALKBH1	Nucleic acid dioxygenase ALKBH1	Color2 [A=255, R=169, G=169, B=169]	1	4		14.0767	14.0262	13.838	13.9513	13.9079	13.9853
	0.607046	-0.194274	Q6NS38	Q6NS38	ALKB2_HUMAN	ALKBH2	DNA oxidative demethylase ALKBH2	Color2 [A=255, R=169, G=169, B=169]	1	4		14.311	14.4238	14.6341	14.3181	14.4142	14.0537
	0.616806	-0.418906	Q9NXW9	Q9NXW9	ALKB4_HUMAN	ALKBH4	Alpha-ketoglutarate-dependent dioxygenase alkB homolog 4	Color2 [A=255, R=169, G=169, B=169]	1	4		10.383	10.9504	10.3959	10.0864	9.78013	10.606
	0.401525	-0.193238	Q6P6C2;Q6P6C2-1;Q6P6C2-3	Q6P6C2;Q6P6C2-1;Q6P6C2-3	ALKB5_HUMAN	ALKBH5	RNA demethylase ALKBH5	Color2 [A=255, R=169, G=169, B=169]	1	4		12.4285	11.9985	12.3216	12.2093	11.7412	12.2183
	0.155671	0.11383	Q9BT30	Q9BT30	ALKB7_HUMAN	ALKBH7	Alpha-ketoglutarate-dependent dioxygenase alkB homolog 7, mitochondrial	Color2 [A=255, R=169, G=169, B=169]	1	4		10.1611	10.8042	10.9836	10.5407	10.8938	10.856
	0.684867	0.717501	Q96BT7;Q96BT7-4	Q96BT7;Q96BT7-2;Q96BT7-3;Q96BT7-4	ALKB8_HUMAN	ALKBH8	Alkylated DNA repair protein alkB homolog 8	Color2 [A=255, R=169, G=169, B=169]	1	4		10.6819	10.0842	10.8223	10.6432	11.0448	12.053
	0.574733	-0.232226	Q8TCU4;Q8TCU4-2	Q8TCU4;Q8TCU4-2;Q8TCU4-3	ALMS1_HUMAN	ALMS1	Centrosome-associated protein ALMS1	Color2 [A=255, R=169, G=169, B=169]	1	4		12.9774	13.2022	12.7101	12.9359	12.6984	12.5587
	0.0292516	-0.0197856	Q96QP1;Q96QP1-2	Q96QP1;Q96QP1-2	ALPK1_HUMAN	ALPK1	Alpha-protein kinase 1	Color2 [A=255, R=169, G=169, B=169]	1	4		9.9495	9.45567	10.0229	9.97483	9.51174	9.88217
	0.0983991	0.0829681	P05186-3	P05186;P05186-2;P05186-3	PPBT_HUMAN	ALPL	Isoform 3 of Alkaline phosphatase, tissue-nonspecific isozyme	Color2 [A=255, R=169, G=169, B=169]	1	4		12.081	11.8971	11.3146	11.8566	11.5051	12.1799
	0.19454	0.151413	Q96Q42	Q96Q42	ALS2_HUMAN	ALS2	Alsin	Color2 [A=255, R=169, G=169, B=169]	1	4		11.1417	11.108	11.0017	11.7872	11.1432	10.7752
	0.00220833	-0.00170581	Q9Y303;Q9Y303-2;Q9Y303-3	Q9Y303;Q9Y303-2;Q9Y303-3	NAGA_HUMAN	AMDHD2	N-acetylglucosamine-6-phosphate deacetylase	Color2 [A=255, R=169, G=169, B=169]	1	4		13.359	13.639	12.8362	13.1422	13.4501	13.2369
	1.17303	0.732204	Q9UKV5	Q9UKV5	AMFR_HUMAN	AMFR	E3 ubiquitin-protein ligase AMFR	Color2 [A=255, R=169, G=169, B=169]	1	4		9.94488	9.85319	9.31255	10.0634	10.4278	10.816
	0.239675	0.115438	Q6DCA0	Q6DCA0	AMERL_HUMAN	AMMECR1L	AMMECR1-like protein	Color2 [A=255, R=169, G=169, B=169]	1	4		12.8384	12.2399	12.372	12.6222	12.4933	12.6811
	1.37442	0.852251	Q4VCS5	Q4VCS5	AMOT_HUMAN	AMOT	Angiomotin	Color2 [A=255, R=169, G=169, B=169]	1	4		11.0038	11.2063	10.6548	11.3262	12.0546	12.0408
	0.499527	0.266739	Q9Y2J4-2	Q9Y2J4;Q9Y2J4-4;Q9Y2J4-2;Q9Y2J4-3	AMOL2_HUMAN	AMOTL2	Isoform 2 of Angiomotin-like protein 2	Color2 [A=255, R=169, G=169, B=169]	1	4		10.8513	10.341	10.5814	10.8245	10.563	11.1865
	0.287799	0.670515	P23109-2	P23109-2	AMPD1_HUMAN	AMPD1	Isoform 2 of AMP deaminase 1	Color2 [A=255, R=169, G=169, B=169]	1	4		9.94379	9.70645	11.2405	11.3815	12.119	9.40174
	0.080166	0.120338	Q01433;Q01433-2;Q01433-4;Q01433-5	Q01433;Q01433-2;Q01433-4;Q01433-5	AMPD2_HUMAN	AMPD2	AMP deaminase 2	Color2 [A=255, R=169, G=169, B=169]	1	4		11.306	11.9816	11.1252	10.8469	11.4915	12.4354
	0.632419	0.168728	P0DTE7;P0DTE8;P0DUB6;P19961;P19961-2	P04746;P0DTE7;P0DTE8;P0DUB6;P19961;P19961-2;P04746-2	AMY1A_HUMAN;AMY1B_HUMAN;AMY1C_HUMAN;AMY2B_HUMAN	AMY1A;AMY1B;AMY1C;AMY2B	Alpha-amylase 1B	Color2 [A=255, R=169, G=169, B=169]	1	4		12.9719	12.7093	12.7445	12.9072	12.8732	13.1514
	0.450791	-0.0463228	Q86W34	Q86W34;Q86W34-5	AMZ2_HUMAN	AMZ2	Archaemetzincin-2	Color2 [A=255, R=169, G=169, B=169]	1	4		14.1911	14.1186	14.1843	14.1935	14.0861	14.0754
	0.423165	-0.0449464	Q9H1A4	Q9H1A4	APC1_HUMAN	ANAPC1	Anaphase-promoting complex subunit 1	Color2 [A=255, R=169, G=169, B=169]	1	4		13.7624	13.8044	13.77	13.7866	13.6478	13.7676
	0.234694	0.0977186	Q9UJX6;Q9UJX6-2	Q9UJX6;Q9UJX6-2	ANC2_HUMAN	ANAPC2	Anaphase-promoting complex subunit 2	Color2 [A=255, R=169, G=169, B=169]	1	4		12.1998	12.6633	12.4725	12.3846	12.7073	12.5368
	0.502572	-0.0611585	Q9UJX5;Q9UJX5-3	Q9UJX5;Q9UJX5-3	APC4_HUMAN	ANAPC4	Anaphase-promoting complex subunit 4	Color2 [A=255, R=169, G=169, B=169]	1	4		13.8306	13.9584	13.9459	13.8019	13.9166	13.8329
	0.866043	-0.0613448	Q9UJX4	Q9UJX4;Q9UJX4-2;Q9UJX4-3	APC5_HUMAN	ANAPC5	Anaphase-promoting complex subunit 5	Color2 [A=255, R=169, G=169, B=169]	1	4		13.3725	13.3555	13.4552	13.3472	13.3421	13.3098
	0.129633	0.0544898	Q9UJX3;Q9UJX3-2	Q9UJX3;Q9UJX3-2	APC7_HUMAN	ANAPC7	Anaphase-promoting complex subunit 7	Color2 [A=255, R=169, G=169, B=169]	1	4		13.6898	14.157	14.0853	14.1277	14.0198	13.9481
	0.816294	0.127003	Q5VTE6;Q5VTE6-2	Q5VTE6;Q5VTE6-2	ANGE2_HUMAN	ANGEL2	Protein angel homolog 2	Color2 [A=255, R=169, G=169, B=169]	1	4		12.4029	12.254	12.2305	12.4766	12.464	12.3277
	0.389661	0.192283	Q01484;Q01484-2;Q01484-5	Q01484;Q01484-2;Q01484-5;Q01484-7	ANK2_HUMAN	ANK2	Ankyrin-2	Color2 [A=255, R=169, G=169, B=169]	1	4		12.6595	12.7196	12.9794	12.643	13.0174	13.2748
	0.325865	-0.0821505	Q12955	Q12955;Q12955-4;Q12955-5;Q12955-6;Q12955-7	ANK3_HUMAN	ANK3	Ankyrin-3	Color2 [A=255, R=169, G=169, B=169]	1	4		13.3885	13.1531	13.3438	13.3269	13.0733	13.2387
	0.0627305	-0.0224158	Q9P2R3;Q9P2R3-4	Q9P2R3;Q9P2R3-2;Q9P2R3-4	ANFY1_HUMAN	ANKFY1	Rabankyrin-5	Color2 [A=255, R=169, G=169, B=169]	1	4		12.5893	12.9255	12.8892	12.9039	12.7384	12.6945
	0.894838	-0.258757	Q8IWZ3-3	Q8IWZ3-2;Q8IWZ3-3	ANKH1_HUMAN	ANKHD1	Isoform 3 of Ankyrin repeat and KH domain-containing protein 1	Color2 [A=255, R=169, G=169, B=169]	1	4		13.4431	13.6689	13.6914	13.4254	13.4755	13.1262
	0.45431	0.0696379	Q8IWZ3;Q8IWZ3-4;Q8IWZ3-6	Q8IWZ3;Q8IWZ3-4;Q8IWZ3-6	ANKH1_HUMAN	ANKHD1	Ankyrin repeat and KH domain-containing protein 1	Color2 [A=255, R=169, G=169, B=169]	1	4		15.2917	15.1186	15.3106	15.2704	15.3028	15.3566
	0.224638	-0.0967286	Q8NAG6;Q8NAG6-1	Q8NAG6;Q8NAG6-1	ANKL1_HUMAN	ANKLE1	Ankyrin repeat and LEM domain-containing protein 1	Color2 [A=255, R=169, G=169, B=169]	1	4		11.2329	11.3967	11.1176	11.2554	11.3402	10.8615
	0.199474	0.0631898	Q86XL3	Q86XL3;Q86XL3-3	ANKL2_HUMAN	ANKLE2	Ankyrin repeat and LEM domain-containing protein 2	Color2 [A=255, R=169, G=169, B=169]	1	4		13.1062	13.0001	13.169	13.1419	12.9686	13.3544
	0.494171	0.122676	Q8IV38	Q8IV38	ANKY2_HUMAN	ANKMY2	Ankyrin repeat and MYND domain-containing protein 2	Color2 [A=255, R=169, G=169, B=169]	1	4		12.1901	11.8876	12.0837	12.2546	12.0535	12.2213
	0.762765	0.72245	Q6UB99	Q6UB99	ANR11_HUMAN	ANKRD11	Ankyrin repeat domain-containing protein 11	Color2 [A=255, R=169, G=169, B=169]	1	4		9.1009	9.25792	8.89897	10.3461	8.97346	10.1055
	0.403176	-0.124762	Q8IZ07	Q8IZ07	AN13A_HUMAN	ANKRD13A	Ankyrin repeat domain-containing protein 13A	Color2 [A=255, R=169, G=169, B=169]	1	4		13.3038	13.282	13.6097	13.1188	13.3535	13.3489
	0.799506	-0.375137	Q86YJ7	Q6ZTN6;Q86YJ7;Q6ZTN6-1;Q86YJ7-2	AN13B_HUMAN	ANKRD13B	Ankyrin repeat domain-containing protein 13B	Color2 [A=255, R=169, G=169, B=169]	1	4		13.1819	13.2402	12.8787	13.0373	12.7431	12.395
	0.636834	0.163658	Q6ZTN6;Q6ZTN6-1	Q6ZTN6;Q6ZTN6-1	AN13D_HUMAN	ANKRD13D	Ankyrin repeat domain-containing protein 13D	Color2 [A=255, R=169, G=169, B=169]	1	4		12.4869	12.4348	12.5036	12.8353	12.4403	12.6408
	0.0267731	-0.0124432	Q6P6B7;Q6P6B7-2	Q6P6B7;Q6P6B7-2	ANR16_HUMAN	ANKRD16	Ankyrin repeat domain-containing protein 16	Color2 [A=255, R=169, G=169, B=169]	1	4		11.8492	11.8088	11.9424	11.6867	11.7211	12.1553
	0.919101	0.192243	O75179;O75179-2;O75179-7	O75179;O75179-2;O75179-6;O75179-7	ANR17_HUMAN	ANKRD17	Ankyrin repeat domain-containing protein 17	Color2 [A=255, R=169, G=169, B=169]	1	4		13.0656	13.0089	13.3162	13.2724	13.3443	13.3507
	0.191557	0.165366	Q9UPS8	Q9UPS8	ANR26_HUMAN	ANKRD26	Ankyrin repeat domain-containing protein 26	Color2 [A=255, R=169, G=169, B=169]	1	4		12.4273	11.4738	11.9416	12.2263	12.3584	11.7542
	0.0448748	-0.0114555	Q96NW4	Q96NW4	ANR27_HUMAN	ANKRD27	Ankyrin repeat domain-containing protein 27	Color2 [A=255, R=169, G=169, B=169]	1	4		14.4469	14.5836	14.3305	14.4788	14.4998	14.348
	0.402453	-0.140519	O15084	O15084;O15084-1;O15084-2;O15084-4	ANR28_HUMAN	ANKRD28	Serine/threonine-protein phosphatase 6 regulatory ankyrin repeat subunit A	Color2 [A=255, R=169, G=169, B=169]	1	4		13.5824	13.6641	13.5421	13.2095	13.4511	13.7065
	0.21662	0.0695947	Q9ULJ7	Q9ULJ7;Q9ULJ7-2	ANR50_HUMAN	ANKRD50	Ankyrin repeat domain-containing protein 50	Color2 [A=255, R=169, G=169, B=169]	1	4		12.7153	12.5011	12.4354	12.5155	12.5413	12.8037
	0.0180749	-0.0058527	Q8NB46	Q8NB46	ANR52_HUMAN	ANKRD52	Serine/threonine-protein phosphatase 6 regulatory ankyrin repeat subunit C	Color2 [A=255, R=169, G=169, B=169]	1	4		13.5234	13.452	13.4383	13.2571	13.5804	13.5587
	0.462989	0.158778	Q96BM1	Q96BM1	ANKR9_HUMAN	ANKRD9	Ankyrin repeat domain-containing protein 9	Color2 [A=255, R=169, G=169, B=169]	1	4		9.56429	9.16578	9.53879	9.51528	9.50174	9.72817
	0.537194	0.0460564	Q92625	Q92625	ANS1A_HUMAN	ANKS1A	Ankyrin repeat and SAM domain-containing protein 1A	Color2 [A=255, R=169, G=169, B=169]	1	4		14.4205	14.4528	14.5389	14.5156	14.5407	14.4941
	0.588022	0.0702883	Q9H8Y5	Q9H8Y5	ANKZ1_HUMAN	ANKZF1	tRNA endonuclease ANKZF1	Color2 [A=255, R=169, G=169, B=169]	1	4		13.8073	13.9242	13.8831	13.9403	13.8718	14.0135
	0.0947705	0.0248423	Q9NQW6	Q9NQW6;Q9NQW6-2	ANLN_HUMAN	ANLN	Anillin	Color2 [A=255, R=169, G=169, B=169]	1	4		14.2256	14.3793	14.5344	14.3513	14.45	14.4125
	0.630734	-2.24351	P39687	P39687;O43423	AN32A_HUMAN	ANP32A	Acidic leucine-rich nuclear phosphoprotein 32 family member A	Color2 [A=255, R=169, G=169, B=169]	1	4		13.4915	14.9556	10.5839	9.67678	9.94865	12.6751
	0.316039	-0.414755	Q92688;Q92688-2	P39687;Q92688;Q92688-2	AN32B_HUMAN	ANP32B	Acidic leucine-rich nuclear phosphoprotein 32 family member B	Color2 [A=255, R=169, G=169, B=169]	1	4		12.6588	14.2576	12.7331	12.9166	12.9467	12.5419
	0.0309853	-0.0140969	P04083	P04083	ANXA1_HUMAN	ANXA1	Annexin A1	Color2 [A=255, R=169, G=169, B=169]	1	4		12.9919	13.1173	13.1597	12.9102	12.9525	13.364
	0.775654	-0.358981	P07355;P07355-2	A6NMY6;P07355;P07355-2	ANXA2_HUMAN	ANXA2	Annexin A2	Color2 [A=255, R=169, G=169, B=169]	1	4		14.7905	15.4366	15.0029	14.8641	14.5351	14.7539
	0.850731	-0.582114	P08758	P08758	ANXA5_HUMAN	ANXA5	Annexin A5	Color2 [A=255, R=169, G=169, B=169]	1	4		12.1826	12.8971	12.2998	12.1642	11.4267	12.0422
	1.1682	-0.258406	P08133;P08133-2	P08133;P08133-2	ANXA6_HUMAN	ANXA6	Annexin A6	Color2 [A=255, R=169, G=169, B=169]	1	4		11.9678	11.9635	11.6715	11.6625	11.5441	11.621
	0.0281594	-0.018343	P20073;P20073-2	P20073;P20073-2	ANXA7_HUMAN	ANXA7	Annexin A7	Color2 [A=255, R=169, G=169, B=169]	1	4		12.5306	12.4159	12.8286	12.2207	12.6791	12.8202
	0.0496143	0.00686741	Q10567-3	Q10567;Q10567-3;Q10567-2;Q10567-4	AP1B1_HUMAN	AP1B1	Isoform C of AP-1 complex subunit beta-1	Color2 [A=255, R=169, G=169, B=169]	1	4		15.4086	15.4712	15.434	15.4987	15.4778	15.3579
	0.361355	1.35246	Q10567;Q10567-2	Q10567;Q10567-2	AP1B1_HUMAN	AP1B1	AP-1 complex subunit beta-1	Color2 [A=255, R=169, G=169, B=169]	1	4		13.3532	10.8101	10.3317	14.2104	10.3581	13.9838
	1.42322	-0.242436	O43747	O43747;O43747-2	AP1G1_HUMAN	AP1G1	AP-1 complex subunit gamma-1	Color2 [A=255, R=169, G=169, B=169]	1	4		16.0127	16.1321	16.2716	15.9476	15.881	15.8605
	0.191195	-0.0562916	O75843	O75843	AP1G2_HUMAN	AP1G2	AP-1 complex subunit gamma-like 2	Color2 [A=255, R=169, G=169, B=169]	1	4		13.7568	13.9171	14.1353	13.8502	13.8579	13.9322
	1.16878	-0.216969	Q9BXS5;Q9BXS5-2	Q9BXS5;Q9BXS5-2	AP1M1_HUMAN	AP1M1	AP-1 complex subunit mu-1	Color2 [A=255, R=169, G=169, B=169]	1	4		15.031	15.264	15.167	15.0469	14.8725	14.8916
	0.864819	-0.35452	P61966	P61966;P61966-2	AP1S1_HUMAN	AP1S1	AP-1 complex subunit sigma-1A	Color2 [A=255, R=169, G=169, B=169]	1	4		12.9135	12.942	13.0071	12.9135	12.6242	12.2613
	2.12702	-0.229752	P56377	P56377	AP1S2_HUMAN	AP1S2	AP-1 complex subunit sigma-2	Color2 [A=255, R=169, G=169, B=169]	1	4		13.7337	13.7	13.6524	13.4245	13.428	13.5444
	0.583134	-0.105481	Q96PC3-4	Q96PC3;Q96PC3-2;Q96PC3-3;Q96PC3-4	AP1S3_HUMAN	AP1S3	Isoform 4 of AP-1 complex subunit sigma-3	Color2 [A=255, R=169, G=169, B=169]	1	4		12.7687	12.7675	12.8672	12.718	12.8104	12.5584
	1.23678	0.0781012	O95782;O95782-2	O95782;O95782-2	AP2A1_HUMAN	AP2A1	AP-2 complex subunit alpha-1	Color2 [A=255, R=169, G=169, B=169]	1	4		15.8931	15.9303	15.9492	15.9973	16.0473	15.9623
	0.296756	-0.219846	O94973	O94973	AP2A2_HUMAN	AP2A2	AP-2 complex subunit alpha-2	Color2 [A=255, R=169, G=169, B=169]	1	4		15.1598	15.691	15.7678	14.8573	15.5811	15.5206
	1.07508	0.0885995	O94973-2	O94973;O94973-2	AP2A2_HUMAN	AP2A2	Isoform 2 of AP-2 complex subunit alpha-2	Color2 [A=255, R=169, G=169, B=169]	1	4		15.9667	16.0184	16.0037	16.0449	16.1558	16.0539
	0.233876	-0.0451514	P63010;P63010-2	P63010;P63010-2;Q10567;Q10567-3;P63010-3;Q10567-2;Q10567-4	AP2B1_HUMAN	AP2B1	AP-2 complex subunit beta	Color2 [A=255, R=169, G=169, B=169]	1	4		16.7359	16.8625	16.8537	16.8755	16.7858	16.6553
	0.102892	0.0231174	Q96CW1;Q96CW1-2	Q96CW1;Q96CW1-2	AP2M1_HUMAN	AP2M1	AP-2 complex subunit mu	Color2 [A=255, R=169, G=169, B=169]	1	4		14.1313	14.3445	14.3288	14.2548	14.2427	14.3765
	0.0627508	0.0143598	P53680	P53680;P53680-2	AP2S1_HUMAN	AP2S1	AP-2 complex subunit sigma	Color2 [A=255, R=169, G=169, B=169]	1	4		15.1642	15.3491	15.2083	15.3514	15.1551	15.2581
	0.52655	0.104875	O00203;O00203-3	O00203;Q13367;O00203-3;Q13367-3;Q13367-4	AP3B1_HUMAN	AP3B1	AP-3 complex subunit beta-1	Color2 [A=255, R=169, G=169, B=169]	1	4		15.4198	15.653	15.6649	15.7431	15.6182	15.6911
	0.553179	0.126763	O14617-5	O14617;O14617-2;O14617-3;O14617-4;O14617-5	AP3D1_HUMAN	AP3D1	Isoform 5 of AP-3 complex subunit delta-1	Color2 [A=255, R=169, G=169, B=169]	1	4		14.6294	14.9432	14.6506	14.8624	14.8816	14.8593
	1.59268	0.262615	Q9Y2T2	Q9Y2T2	AP3M1_HUMAN	AP3M1	AP-3 complex subunit mu-1	Color2 [A=255, R=169, G=169, B=169]	1	4		16.2563	16.0448	16.2004	16.3779	16.3997	16.5117
	0.402375	0.226948	P53677	P53677;P53677-2	AP3M2_HUMAN	AP3M2	AP-3 complex subunit mu-2	Color2 [A=255, R=169, G=169, B=169]	1	4		11.8327	12.2732	12.2071	12.4515	11.9488	12.5936
	0.64705	0.194228	Q92572	Q92572	AP3S1_HUMAN	AP3S1	AP-3 complex subunit sigma-1	Color2 [A=255, R=169, G=169, B=169]	1	4		16.5403	16.6397	16.3935	16.5109	16.7361	16.909
	0.0511563	0.0256882	P59780	P59780;Q7Z6K5-2	AP3S2_HUMAN	AP3S2	AP-3 complex subunit sigma-2	Color2 [A=255, R=169, G=169, B=169]	1	4		14.2514	13.7333	13.9024	13.8625	13.9628	14.1388
	1.47807	-0.0795097	Q9Y6B7	Q9Y6B7	AP4B1_HUMAN	AP4B1	AP-4 complex subunit beta-1	Color2 [A=255, R=169, G=169, B=169]	1	4		13.3089	13.3089	13.3174	13.1859	13.2402	13.2706
	0.190164	-0.105841	Q9UPM8	Q9UPM8;Q9UPM8-2	AP4E1_HUMAN	AP4E1	AP-4 complex subunit epsilon-1	Color2 [A=255, R=169, G=169, B=169]	1	4		13.5352	13.1465	13.122	13.2018	13.4273	12.8572
	0.124183	0.0619577	O00189	O00189	AP4M1_HUMAN	AP4M1	AP-4 complex subunit mu-1	Color2 [A=255, R=169, G=169, B=169]	1	4		12.3432	12.1744	11.7977	11.9969	12.2375	12.2667
	0.346164	-0.13009	Q9Y587	Q9Y587;Q9Y587-2;Q9Y587-3;Q9Y587-4	AP4S1_HUMAN	AP4S1	AP-4 complex subunit sigma-1	Color2 [A=255, R=169, G=169, B=169]	1	4		12.9533	12.6637	12.9134	12.944	12.6889	12.5071
	0.266222	-0.161007	Q2VPB7	Q2VPB7	AP5B1_HUMAN	AP5B1	AP-5 complex subunit beta-1	Color2 [A=255, R=169, G=169, B=169]	1	4		11.8967	12.5967	12.5122	12.3467	12.0048	12.1712
	2.34819	-2.9905	Q9H0R1	Q9H0R1	AP5M1_HUMAN	AP5M1	AP-5 complex subunit mu-1	Color2 [A=255, R=169, G=169, B=169]	1	4		13.8516	12.8125	12.8928	10.8019	9.44882	10.3345
	0.0607651	0.066831	O43299	O43299;O43299-2;O43299-3	AP5Z1_HUMAN	AP5Z1	AP-5 complex subunit zeta-1	Color2 [A=255, R=169, G=169, B=169]	1	4		11.3281	12.4291	12.3289	12.0714	12.3635	11.8518
	1.05941	-0.192335	O14727;O14727-4	O14727;O14727-2;O14727-3;O14727-4;O14727-5;O14727-6	APAF_HUMAN	APAF1	Apoptotic protease-activating factor 1	Color2 [A=255, R=169, G=169, B=169]	1	4		13.6602	13.8665	13.7038	13.4361	13.6173	13.6
	0.726591	-0.168008	Q99767;Q99767-2	Q99767;Q99767-2	APBA2_HUMAN	APBA2	Amyloid-beta A4 precursor protein-binding family A member 2	Color2 [A=255, R=169, G=169, B=169]	1	4		15.3674	15.2207	15.5248	15.0915	15.2928	15.2245
	0.189259	0.25551	O96018	O96018	APBA3_HUMAN	APBA3	Amyloid-beta A4 precursor protein-binding family A member 3	Color2 [A=255, R=169, G=169, B=169]	1	4		12.1443	10.9812	10.7641	11.4529	12.0937	11.1095
	0.053946	0.0232814	O00213;O00213-2	O00213;Q92870;Q92870-2;O00213-2;O00213-3;O00213-4;O00213-5;O00213-6;Q92870-4	APBB1_HUMAN	APBB1	Amyloid beta precursor protein binding family B member 1	Color2 [A=255, R=169, G=169, B=169]	1	4		14.4769	14.5169	14.2689	14.3636	14.6937	14.2753
	0.216899	-0.129306	Q92870;Q92870-2;Q92870-4	Q92870;Q92870-2;Q92870-4	APBB2_HUMAN	APBB2	Amyloid beta precursor protein binding family B member 2	Color2 [A=255, R=169, G=169, B=169]	1	4		12.0725	11.5246	12.2614	11.9175	11.8676	11.6856
	0.892342	0.148022	P25054	P25054;P25054-2;P25054-3	APC_HUMAN	APC	Adenomatous polyposis coli protein	Color2 [A=255, R=169, G=169, B=169]	1	4		12.0543	11.9795	12.0038	12.092	12.3087	12.081
	2.12357	-0.329773	P13798	P13798	ACPH_HUMAN	APEH	Acylamino-acid-releasing enzyme	Color2 [A=255, R=169, G=169, B=169]	1	4		13.6503	13.632	13.5366	13.273	13.1816	13.3749
	0.0151539	-0.00504303	P27695	P27695	APEX1_HUMAN	APEX1	DNA-(apurinic or apyrimidinic site) endonuclease	Color2 [A=255, R=169, G=169, B=169]	1	4		13.1613	13.0254	13.3052	13.0483	13.1265	13.302
	1.10976	0.884371	Q9BZZ5-1	Q9BZZ5-1	API5_HUMAN	API5	Isoform 1 of Apoptosis inhibitor 5	Color2 [A=255, R=169, G=169, B=169]	1	4		11.403	10.8399	10.2517	11.5251	12.0614	11.5612
	0.30335	0.0289892	Q9BZZ5-2	Q9BZZ5-2;Q9BZZ5-5	API5_HUMAN	API5	Isoform 2 of Apoptosis inhibitor 5	Color2 [A=255, R=169, G=169, B=169]	1	4		18.4628	18.3996	18.534	18.4927	18.4918	18.4989
	1.22461	1.42898	Q9BZZ5-6	Q9BZZ5;Q9BZZ5-6	API5_HUMAN	API5	Isoform 6 of Apoptosis inhibitor 5	Color2 [A=255, R=169, G=169, B=169]	1	4		10.2522	9.25037	9.85145	11.364	10.3446	11.9324
	0.209621	0.215869	Q06481;Q06481-2;Q06481-3;Q06481-4;Q06481-6	Q06481;Q06481-5;Q06481-2;Q06481-3;Q06481-4;Q06481-6	APLP2_HUMAN	APLP2	Amyloid beta precursor like protein 2	Color2 [A=255, R=169, G=169, B=169]	1	4		13.2112	12.4992	13.0499	12.6433	12.9874	13.7772
	0.271834	0.638295	P02647	P02647	APOA1_HUMAN	APOA1	Apolipoprotein A-I	Color2 [A=255, R=169, G=169, B=169]	1	4		10.9635	9.66834	8.96079	9.68517	11.9712	9.85109
	1.32037	-0.150216	P04114	P04114	APOB_HUMAN	APOB	Apolipoprotein B-100	Color2 [A=255, R=169, G=169, B=169]	1	4		15.4557	15.403	15.4869	15.3641	15.3243	15.2065
	1.60335	-0.506876	P02656	P02656	APOC3_HUMAN	APOC3	Apolipoprotein C-III	Color2 [A=255, R=169, G=169, B=169]	1	4		12.6999	12.5577	12.4039	11.9463	12.2802	11.9143
	0.136602	-0.136641	P02649	P02649	APOE_HUMAN	APOE	Apolipoprotein E	Color2 [A=255, R=169, G=169, B=169]	1	4		11.2358	10.1658	11.1868	10.6556	10.5604	10.9626
	0.0805618	0.0143627	P02749	P02749	APOH_HUMAN	APOH	Beta-2-glycoprotein 1	Color2 [A=255, R=169, G=169, B=169]	1	4		15.2745	15.3145	15.4542	15.4046	15.3811	15.3006
	0.29006	0.0889228	Q9BQE5	Q9BQE5	APOL2_HUMAN	APOL2	Apolipoprotein L2	Color2 [A=255, R=169, G=169, B=169]	1	4		13.2438	13.0645	13.2711	13.4796	13.2483	13.1182
	0.663111	0.106172	P05067;P05067-11;P05067-7;P05067-8;P05067-9	P05067;P05067-4;P05067-10;P05067-11;P05067-3;P05067-5;P05067-6;P05067-7;P05067-8;P05067-9	A4_HUMAN	APP	Amyloid-beta precursor protein	Color2 [A=255, R=169, G=169, B=169]	1	4		12.8472	12.6081	12.6908	12.7998	12.8586	12.8062
	0.0500031	0.00726922	Q9UKG1	Q9UKG1	DP13A_HUMAN	APPL1	DCC-interacting protein 13-alpha	Color2 [A=255, R=169, G=169, B=169]	1	4		15.9906	15.9499	16.0658	16.0225	15.9405	16.0652
	0.00412293	0.00129604	Q8NEU8;Q8NEU8-3	Q8NEU8;Q8NEU8-2;Q8NEU8-3	DP13B_HUMAN	APPL2	DCC-interacting protein 13-beta	Color2 [A=255, R=169, G=169, B=169]	1	4		13.3427	13.3132	13.1346	13.4118	13.245	13.1377
	0.0163594	-0.00512695	P07741	P07741	APT_HUMAN	APRT	Adenine phosphoribosyltransferase	Color2 [A=255, R=169, G=169, B=169]	1	4		16.7949	17	16.9391	16.8134	17.0746	16.8307
	2.29974	1.81425	Q7Z2E3;Q7Z2E3-3;Q7Z2E3-7;Q7Z2E3-8	Q7Z2E3;Q7Z2E3-7;Q7Z2E3-10;Q7Z2E3-11;Q7Z2E3-2;Q7Z2E3-3;Q7Z2E3-4;Q7Z2E3-5;Q7Z2E3-6;Q7Z2E3-8;Q7Z2E3-9	APTX_HUMAN	APTX	Aprataxin	Color2 [A=255, R=169, G=169, B=169]	1	4		9.89228	9.1924	9.29726	11.5125	10.7944	11.5178
	0.59102	0.109973	O60306	O60306	AQR_HUMAN	AQR	RNA helicase aquarius	Color2 [A=255, R=169, G=169, B=169]	1	4		14.4101	14.144	14.1903	14.3515	14.3394	14.3835
	0.0300152	0.00361983	P10398	P10398	ARAF_HUMAN	ARAF	Serine/threonine-protein kinase A-Raf	Color2 [A=255, R=169, G=169, B=169]	1	4		15.9283	15.9239	15.881	15.9898	15.8823	15.8719
	1.63629	0.193809	Q96P48;Q96P48-3	Q96P48;Q96P48-1;Q96P48-2;Q96P48-3;Q96P48-4;Q96P48-5;Q96P48-7	ARAP1_HUMAN	ARAP1	Arf-GAP with Rho-GAP domain, ANK repeat and PH domain-containing protein 1	Color2 [A=255, R=169, G=169, B=169]	1	4		17.186	17.0088	17.1045	17.2617	17.2972	17.3219
	0.0497	-0.0100803	P48444	P48444	COPD_HUMAN	ARCN1	Coatomer subunit delta	Color2 [A=255, R=169, G=169, B=169]	1	4		17.9471	17.899	17.8944	17.9047	18.0197	17.7858
	0.261422	0.0830803	P84077	P61204;P84077;P61204-2	ARF1_HUMAN	ARF1	ADP-ribosylation factor 1	Color2 [A=255, R=169, G=169, B=169]	1	4		17.365	17.2546	17.3781	17.6401	17.3793	17.2276
	0.401484	-0.0844936	P18085	P18085	ARF4_HUMAN	ARF4	ADP-ribosylation factor 4	Color2 [A=255, R=169, G=169, B=169]	1	4		17.8501	17.9072	17.9158	17.9053	17.8806	17.6337
	0.409831	-0.113439	P84085	P84085	ARF5_HUMAN	ARF5	ADP-ribosylation factor 5	Color2 [A=255, R=169, G=169, B=169]	1	4		17.7951	17.7815	17.8919	17.9252	17.6553	17.5477
	0.0254885	-0.00782744	P62330	P62330	ARF6_HUMAN	ARF6	ADP-ribosylation factor 6	Color2 [A=255, R=169, G=169, B=169]	1	4		15.1848	15.3341	15.4522	15.4229	15.3346	15.1903
	0.301145	0.0935942	Q8N6T3;Q8N6T3-3	Q8N6T3;Q8N6T3-3;Q8N6T3-2;Q8N6T3-4;Q8N6T3-5	ARFG1_HUMAN	ARFGAP1	ADP-ribosylation factor GTPase-activating protein 1	Color2 [A=255, R=169, G=169, B=169]	1	4		13.2021	12.9384	13.1255	13.0318	13.1458	13.3693
	0.942666	0.165194	Q8N6H7	Q8N6H7;Q8N6H7-2	ARFG2_HUMAN	ARFGAP2	ADP-ribosylation factor GTPase-activating protein 2	Color2 [A=255, R=169, G=169, B=169]	1	4		14.6261	14.644	14.6592	14.7577	14.6996	14.9676
	0.148596	-0.0664937	Q9NP61;Q9NP61-2	Q9NP61;Q9NP61-2	ARFG3_HUMAN	ARFGAP3	ADP-ribosylation factor GTPase-activating protein 3	Color2 [A=255, R=169, G=169, B=169]	1	4		12.7067	12.6072	12.7046	12.4974	12.3941	12.9276
	0.0228664	-0.00511392	Q9Y6D6	Q9Y6D6	BIG1_HUMAN	ARFGEF1	Brefeldin A-inhibited guanine nucleotide-exchange protein 1	Color2 [A=255, R=169, G=169, B=169]	1	4		14.3842	14.3389	14.4859	14.5192	14.343	14.3315
	0.750324	-0.121496	Q9Y6D5	Q9Y6D5	BIG2_HUMAN	ARFGEF2	Brefeldin A-inhibited guanine nucleotide-exchange protein 2	Color2 [A=255, R=169, G=169, B=169]	1	4		14.9146	14.9138	15.0195	14.9588	14.7567	14.7679
	2.31136	0.369835	Q5TH69	Q5TH69	BIG3_HUMAN	ARFGEF3	Brefeldin A-inhibited guanine nucleotide-exchange protein 3	Color2 [A=255, R=169, G=169, B=169]	1	4		10.5479	10.5708	10.6183	10.8445	11.06	10.942
	0.167927	0.0317443	P53367	P53367;P53367-2;P53367-3	ARFP1_HUMAN	ARFIP1	Arfaptin-1	Color2 [A=255, R=169, G=169, B=169]	1	4		15.1624	15.0479	14.9534	15.0324	15.0672	15.1593
	0.0913639	0.0335286	P53367-2	P53367-2	ARFP1_HUMAN	ARFIP1	Isoform A of Arfaptin-1	Color2 [A=255, R=169, G=169, B=169]	1	4		13.9921	13.5812	13.9065	13.824	13.9359	13.8205
	0.512437	0.11235	P53365	P53365;P53365-2;P53365-3	ARFP2_HUMAN	ARFIP2	Arfaptin-2	Color2 [A=255, R=169, G=169, B=169]	1	4		14.6818	14.7326	14.8329	14.9387	14.9544	14.6912
	0.503634	-0.424197	P05089;P05089-2	P05089;P05089-2	ARGI1_HUMAN	ARG1	Arginase-1	Color2 [A=255, R=169, G=169, B=169]	1	4		12.4598	11.9945	12.5041	12.4225	11.9763	11.287
	0.137572	-0.0100094	Q07960	Q07960	RHG01_HUMAN	ARHGAP1	Rho GTPase-activating protein 1	Color2 [A=255, R=169, G=169, B=169]	1	4		14.4956	14.458	14.5042	14.5181	14.4701	14.4396
	0.890251	-0.315872	A1A4S6	A1A4S6	RHG10_HUMAN	ARHGAP10	Rho GTPase-activating protein 10	Color2 [A=255, R=169, G=169, B=169]	1	4		11.3884	11.1329	11.5065	11.039	10.8073	11.2339
	0.0511118	0.049051	Q8IWW6;Q8IWW6-2;Q8IWW6-3;Q8IWW6-4	Q8IWW6;Q8IWW6-2;Q8IWW6-3;Q8IWW6-4	RHG12_HUMAN	ARHGAP12	Rho GTPase-activating protein 12	Color2 [A=255, R=169, G=169, B=169]	1	4		11.4441	11.9258	11.8684	11.9455	11.2299	12.21
	0.721545	0.051006	Q68EM7	Q68EM7;Q68EM7-2;Q68EM7-4;Q68EM7-5;Q68EM7-6	RHG17_HUMAN	ARHGAP17	Rho GTPase-activating protein 17	Color2 [A=255, R=169, G=169, B=169]	1	4		13.7664	13.6963	13.7114	13.7334	13.7759	13.8177
	0.31083	0.110593	Q8N392	Q8N392;Q8N392-2	RHG18_HUMAN	ARHGAP18	Rho GTPase-activating protein 18	Color2 [A=255, R=169, G=169, B=169]	1	4		13.0825	12.7359	13.098	12.9985	12.9982	13.2516
	0.535352	-0.165172	Q14CB8;Q14CB8-2;Q14CB8-3;Q14CB8-6	Q14CB8;Q14CB8-2;Q14CB8-3;Q14CB8-6	RHG19_HUMAN	ARHGAP19	Rho GTPase-activating protein 19	Color2 [A=255, R=169, G=169, B=169]	1	4		13.8303	13.9026	13.8894	13.7332	13.9284	13.4653
	0.232864	0.126795	Q5T5U3	Q5T5U3	RHG21_HUMAN	ARHGAP21	Rho GTPase-activating protein 21	Color2 [A=255, R=169, G=169, B=169]	1	4		12.0238	11.3556	11.4529	11.6435	11.7747	11.7945
	0.242045	0.363909	A7KAX9	A7KAX9;O14559;Q7Z6I6;A7KAX9-2;A7KAX9-3;O14559-10;O14559-11;Q7Z6I6-2;Q7Z6I6-3;Q7Z6I6-4	RHG32_HUMAN	ARHGAP32	Rho GTPase-activating protein 32	Color2 [A=255, R=169, G=169, B=169]	1	4		10.6921	10.9107	9.08832	10.8065	10.6663	10.3101
	0.103017	-0.0111345	Q9NRY4	Q9NRY4	RHG35_HUMAN	ARHGAP35	Rho GTPase-activating protein 35	Color2 [A=255, R=169, G=169, B=169]	1	4		14.2982	14.3707	14.3689	14.3257	14.2868	14.3919
	0.983257	0.23925	Q92619	Q92619;Q92619-2	HMHA1_HUMAN	ARHGAP45	Rho GTPase-activating protein 45	Color2 [A=255, R=169, G=169, B=169]	1	4		12.6128	12.483	12.5953	12.6064	12.9726	12.8297
	0.1147	0.0413955	Q13017;Q13017-2	Q13017;Q13017-2;Q13017-3;Q13017-4	RHG05_HUMAN	ARHGAP5	Rho GTPase-activating protein 5	Color2 [A=255, R=169, G=169, B=169]	1	4		13.6996	13.3966	13.6721	13.8021	13.507	13.5835
	0.496116	-0.121804	P85298;P85298-3;P85298-4	P85298;P85298-2;P85298-3;P85298-4;P85298-5	RHG08_HUMAN	ARHGAP8	Rho GTPase-activating protein 8	Color2 [A=255, R=169, G=169, B=169]	1	4		13.2281	13.3697	13.062	13.17	12.9794	13.1449
	0.240677	-0.0697753	P52565	P52565;P52565-2	GDIR1_HUMAN	ARHGDIA	Rho GDP-dissociation inhibitor 1	Color2 [A=255, R=169, G=169, B=169]	1	4		14.7833	14.9066	14.6688	14.7494	14.5443	14.8557
	0.881442	-0.0544675	Q92888;Q92888-3	Q92888;Q92888-2;Q92888-3;Q92888-4	ARHG1_HUMAN	ARHGEF1	Rho guanine nucleotide exchange factor 1	Color2 [A=255, R=169, G=169, B=169]	1	4		15.9585	15.8834	15.9727	15.8839	15.8971	15.8701
	0.464728	0.039711	O15013;O15013-4;O15013-5;O15013-6;O15013-7	O15013;O15013-4;O15013-5;O15013-6;O15013-7	ARHGA_HUMAN	ARHGEF10	Rho guanine nucleotide exchange factor 10	Color2 [A=255, R=169, G=169, B=169]	1	4		14.6831	14.6722	14.681	14.7863	14.7093	14.6598
	0.0259077	-0.0114333	O15085;O15085-2	O15085;O15085-2	ARHGB_HUMAN	ARHGEF11	Rho guanine nucleotide exchange factor 11	Color2 [A=255, R=169, G=169, B=169]	1	4		13.3161	13.0636	13.0826	13.0833	13.3802	12.9645
	0.113126	-0.0235895	Q9NZN5;Q9NZN5-2	Q9NZN5;Q9NZN5-2	ARHGC_HUMAN	ARHGEF12	Rho guanine nucleotide exchange factor 12	Color2 [A=255, R=169, G=169, B=169]	1	4		13.8864	13.8954	13.7663	13.886	13.6996	13.8918
	0.0470469	0.0401608	Q5VV41	Q5VV41;Q5VV41-2	ARHGG_HUMAN	ARHGEF16	Rho guanine nucleotide exchange factor 16	Color2 [A=255, R=169, G=169, B=169]	1	4		11.7975	11.5963	12.0645	11.3503	12.0336	12.1949
	0.520477	0.0889346	Q6ZSZ5;Q6ZSZ5-5;Q6ZSZ5-6	Q6ZSZ5;Q6ZSZ5-1;Q6ZSZ5-2;Q6ZSZ5-5;Q6ZSZ5-6	ARHGI_HUMAN	ARHGEF18	Rho guanine nucleotide exchange factor 18	Color2 [A=255, R=169, G=169, B=169]	1	4		13.9887	13.8201	13.9084	13.8809	14.0429	14.0603
	0.222286	0.0281502	Q92974;Q92974-2;Q92974-3	Q92974;Q92974-2;Q92974-3	ARHG2_HUMAN	ARHGEF2	Rho guanine nucleotide exchange factor 2	Color2 [A=255, R=169, G=169, B=169]	1	4		15.351	15.2134	15.2511	15.3346	15.2456	15.3198
	0.0715309	0.0374104	Q8TER5;Q8TER5-3;Q8TER5-4	Q8TER5;Q8TER5-3;Q8TER5-4	ARH40_HUMAN	ARHGEF40	Rho guanine nucleotide exchange factor 40	Color2 [A=255, R=169, G=169, B=169]	1	4		12.2999	12.1232	11.9676	11.9858	12.0389	12.4781
	0.0339663	0.00459925	Q14155-5	Q14155;Q14155-1;Q14155-2;Q14155-3;Q14155-5;Q14155-6	ARHG7_HUMAN	ARHGEF7	Isoform 5 of Rho guanine nucleotide exchange factor 7	Color2 [A=255, R=169, G=169, B=169]	1	4		13.6701	13.5712	13.6312	13.6323	13.5654	13.6885
	0.509763	0.100645	O14497	O14497;O14497-2;O14497-3	ARI1A_HUMAN	ARID1A	AT-rich interactive domain-containing protein 1A	Color2 [A=255, R=169, G=169, B=169]	1	4		13.0191	12.8632	12.7392	12.9822	12.9185	13.0228
	0.287216	-0.121594	Q68CP9;Q68CP9-3	Q68CP9;Q68CP9-3	ARID2_HUMAN	ARID2	AT-rich interactive domain-containing protein 2	Color2 [A=255, R=169, G=169, B=169]	1	4		13.3005	12.811	13.1085	12.8418	12.8734	13.14
	1.2155	0.217427	Q99856	Q99856	ARI3A_HUMAN	ARID3A	AT-rich interactive domain-containing protein 3A	Color2 [A=255, R=169, G=169, B=169]	1	4		14.2444	13.992	14.2105	14.4137	14.3154	14.3701
	0.0843875	-0.0112257	Q8IVW6;Q8IVW6-4	Q8IVW6;Q8IVW6-3;Q8IVW6-4	ARI3B_HUMAN	ARID3B	AT-rich interactive domain-containing protein 3B	Color2 [A=255, R=169, G=169, B=169]	1	4		15.1462	15.0862	14.9885	15.0615	15.0809	15.0448
	1.17799	1.4414	Q14865	Q14865;Q14865-3	ARI5B_HUMAN	ARID5B	AT-rich interactive domain-containing protein 5B	Color2 [A=255, R=169, G=169, B=169]	1	4		11.5724	10.0209	11.8586	12.5101	12.7338	12.5322
	0.46673	0.12104	Q9Y4X5	Q9Y4X5	ARI1_HUMAN	ARIH1	E3 ubiquitin-protein ligase ARIH1	Color2 [A=255, R=169, G=169, B=169]	1	4		12.9631	13.0516	12.8978	13.0166	12.9635	13.2955
	1.13238	-0.241586	O95376	O95376	ARI2_HUMAN	ARIH2	E3 ubiquitin-protein ligase ARIH2	Color2 [A=255, R=169, G=169, B=169]	1	4		12.8335	12.5883	12.585	12.4113	12.5338	12.3369
	0.529206	-0.173777	P40616;P40616-2	P40616;P40616-2	ARL1_HUMAN	ARL1	ADP-ribosylation factor-like protein 1	Color2 [A=255, R=169, G=169, B=169]	1	4		14.864	15.0639	15.0837	15.0823	14.6896	14.7182
	0.651413	-0.315509	Q8N8R7	Q8N8R7	AL14E_HUMAN	ARL14EP	ARL14 effector protein	Color2 [A=255, R=169, G=169, B=169]	1	4		11.2587	10.9687	10.8611	10.5253	10.5346	11.082
	0.521809	-0.761723	Q9NXU5	Q9NXU5	ARL15_HUMAN	ARL15	ADP-ribosylation factor-like protein 15	Color2 [A=255, R=169, G=169, B=169]	1	4		12.1321	11.4595	12.6659	11.7878	10.251	11.9336
	0.466962	-0.0851965	P36404	P36404	ARL2_HUMAN	ARL2	ADP-ribosylation factor-like protein 2	Color2 [A=255, R=169, G=169, B=169]	1	4		14.9555	14.9786	14.9327	14.9415	14.9548	14.715
	1.54915	0.357628	P36405	P36405	ARL3_HUMAN	ARL3	ADP-ribosylation factor-like protein 3	Color2 [A=255, R=169, G=169, B=169]	1	4		12.852	13.0034	13.1266	13.491	13.3037	13.2603
	0.787535	-0.340584	Q9Y689;Q9Y689-2	Q96KC2;Q9Y689;Q9Y689-2	ARL5A_HUMAN	ARL5A	ADP-ribosylation factor-like protein 5A	Color2 [A=255, R=169, G=169, B=169]	1	4		12.7588	12.4291	12.2459	12.2492	12.2876	11.8751
	0.88983	-0.0959501	Q96KC2	Q96KC2	ARL5B_HUMAN	ARL5B	ADP-ribosylation factor-like protein 5B	Color2 [A=255, R=169, G=169, B=169]	1	4		11.4767	11.4436	11.327	11.3381	11.2769	11.3444
	0.349276	0.295771	Q9H0F7-2	Q9H0F7;Q9H0F7-2	ARL6_HUMAN	ARL6	Isoform 2 of ADP-ribosylation factor-like protein 6	Color2 [A=255, R=169, G=169, B=169]	1	4		10.3453	9.33583	10.0861	10.541	9.9241	10.1895
	0.487507	1.16851	Q66PJ3-1;Q66PJ3-2;Q66PJ3-3;Q66PJ3-4	Q66PJ3;Q66PJ3-4;Q66PJ3-1;Q66PJ3-10;Q66PJ3-2;Q66PJ3-3;Q66PJ3-7;Q66PJ3-9	AR6P4_HUMAN	ARL6IP4	Isoform 1 of ADP-ribosylation factor-like protein 6-interacting protein 4	Color2 [A=255, R=169, G=169, B=169]	1	4		10.4103	13.4554	13.4395	13.2036	13.5368	14.0703
	1.04906	0.377811	O75915	O75915	PRAF3_HUMAN	ARL6IP5	PRA1 family protein 3	Color2 [A=255, R=169, G=169, B=169]	1	4		11.3441	11.1263	11.0613	11.8459	11.3871	11.4321
	0.0188476	-0.00606728	Q96BM9	Q96BM9	ARL8A_HUMAN	ARL8A	ADP-ribosylation factor-like protein 8A	Color2 [A=255, R=169, G=169, B=169]	1	4		15.5741	15.4642	15.3488	15.571	15.5077	15.2902
	0.218624	0.0522375	Q9NVJ2	Q96BM9;Q9NVJ2	ARL8B_HUMAN	ARL8B	ADP-ribosylation factor-like protein 8B	Color2 [A=255, R=169, G=169, B=169]	1	4		15.7566	15.5854	15.4852	15.5644	15.6994	15.72
	0.866357	0.218157	Q9NVT9	Q9NVT9;Q9NVT9-2	ARMC1_HUMAN	ARMC1	Armadillo repeat-containing protein 1	Color2 [A=255, R=169, G=169, B=169]	1	4		14.4927	14.1877	14.1758	14.5671	14.5484	14.3951
	0.192186	0.213936	Q8N2F6;Q8N2F6-2;Q8N2F6-3;Q8N2F6-4	Q8N2F6;Q8N2F6-2;Q8N2F6-3;Q8N2F6-4;Q8N2F6-5;Q8N2F6-6	ARM10_HUMAN	ARMC10	Armadillo repeat-containing protein 10	Color2 [A=255, R=169, G=169, B=169]	1	4		10.0042	10.3902	11.0225	10.4754	10.2931	11.2901
	0.378418	0.768899	Q96C12;Q96C12-2	Q96C12;Q96C12-2;Q96C12-3;Q96C12-4	ARMC5_HUMAN	ARMC5	Armadillo repeat-containing protein 5	Color2 [A=255, R=169, G=169, B=169]	1	4		11.8725	9.14757	11.4612	11.7116	11.414	11.6623
	1.61709	-0.0842447	Q6NXE6	Q6NXE6	ARMC6_HUMAN	ARMC6	Armadillo repeat-containing protein 6	Color2 [A=255, R=169, G=169, B=169]	1	4		15.2671	15.1858	15.2332	15.1441	15.1385	15.1508
	0.192794	-0.0964721	Q8IUR7;Q8IUR7-2;Q8IUR7-7	Q8IUR7;Q8IUR7-2;Q8IUR7-3;Q8IUR7-6;Q8IUR7-7	ARMC8_HUMAN	ARMC8	Armadillo repeat-containing protein 8	Color2 [A=255, R=169, G=169, B=169]	1	4		12.2041	12.7951	12.3955	12.4347	12.2079	12.4627
	0.231298	-0.067393	Q7Z3E5;Q7Z3E5-2	Q7Z3E5;Q7Z3E5-2	ARMC9_HUMAN	ARMC9	LisH domain-containing protein ARMC9	Color2 [A=255, R=169, G=169, B=169]	1	4		12.8892	12.6165	12.5939	12.5951	12.5458	12.7566
	0.109965	0.0359058	Q9UH62	Q9UH62	ARMX3_HUMAN	ARMCX3	Armadillo repeat-containing X-linked protein 3	Color2 [A=255, R=169, G=169, B=169]	1	4		14.173	13.9086	13.8176	14.0313	14.0723	13.9033
	0.581176	-0.447339	Q6P1M9	Q6P1M9	ARMX5_HUMAN	ARMCX5	Armadillo repeat-containing X-linked protein 5	Color2 [A=255, R=169, G=169, B=169]	1	4		11.8808	12.0984	11.6274	11.6549	10.798	11.8116
	0.64643	-0.101991	Q5T2E6	Q5T2E6	ARMD3_HUMAN	ARMH3	Armadillo-like helical domain-containing protein 3	Color2 [A=255, R=169, G=169, B=169]	1	4		15.2688	15.1994	15.1848	15.1891	15.1748	14.9831
	0.750698	-0.440995	P27540;P27540-2;P27540-3;P27540-4	P27540;P27540-2;P27540-3;P27540-4	ARNT_HUMAN	ARNT	Aryl hydrocarbon receptor nuclear translocator	Color2 [A=255, R=169, G=169, B=169]	1	4		10.5796	9.78084	10.4235	10.0438	9.66659	9.75048
	1.39369	0.164379	Q92747	Q92747	ARC1A_HUMAN	ARPC1A	Actin-related protein 2/3 complex subunit 1A	Color2 [A=255, R=169, G=169, B=169]	1	4		14.1816	14.321	14.332	14.3938	14.4509	14.483
	0.389474	-0.129934	O15143	O15143	ARC1B_HUMAN	ARPC1B	Actin-related protein 2/3 complex subunit 1B	Color2 [A=255, R=169, G=169, B=169]	1	4		12.8968	13.2407	12.9115	12.9535	12.7181	12.9876
	0.0404474	0.00921408	O15144	O15144	ARPC2_HUMAN	ARPC2	Actin-related protein 2/3 complex subunit 2	Color2 [A=255, R=169, G=169, B=169]	1	4		14.4808	14.5496	14.3155	14.4851	14.4988	14.3896
	0.737868	-0.261982	O15145	O15145	ARPC3_HUMAN	ARPC3	Actin-related protein 2/3 complex subunit 3	Color2 [A=255, R=169, G=169, B=169]	1	4		13.7686	13.4531	13.6198	13.5413	13.0907	13.4235
	0.414787	-0.261104	P59998;P59998-3	P59998;P59998-2;P59998-3	ARPC4_HUMAN	ARPC4	Actin-related protein 2/3 complex subunit 4	Color2 [A=255, R=169, G=169, B=169]	1	4		14.9592	15.7423	15.1485	15.2709	14.8557	14.9401
	0.136757	-0.0590274	P32121;P32121-3;P32121-4	P32121;P32121-2;P32121-3;P32121-4;P32121-5	ARRB2_HUMAN	ARRB2	Beta-arrestin-2	Color2 [A=255, R=169, G=169, B=169]	1	4		13.8792	13.7554	13.5986	13.4192	13.8759	13.761
	0.831313	1.53931	P15848;P15848-2	P15848;P15848-2	ARSB_HUMAN	ARSB	Arylsulfatase B	Color2 [A=255, R=169, G=169, B=169]	1	4		9.407	9.34056	11.8406	12.2254	11.5335	11.4472
	1.56268	-0.307718	Q9HBK9	Q9HBK9;Q9HBK9-2	AS3MT_HUMAN	AS3MT	Arsenite methyltransferase	Color2 [A=255, R=169, G=169, B=169]	1	4		11.6014	11.8417	11.8509	11.4578	11.5244	11.3886
	0.409407	0.115209	Q9ULH1	Q9ULH1	ASAP1_HUMAN	ASAP1	Arf-GAP with SH3 domain, ANK repeat and PH domain-containing protein 1	Color2 [A=255, R=169, G=169, B=169]	1	4		13.1538	13.1746	12.8898	13.0963	13.3402	13.1273
	0.764519	-0.232769	O43150	O43150;O43150-2	ASAP2_HUMAN	ASAP2	Arf-GAP with SH3 domain, ANK repeat and PH domain-containing protein 2	Color2 [A=255, R=169, G=169, B=169]	1	4		12.5111	12.4516	12.7695	12.4878	12.1508	12.3953
	0.289895	-0.0394621	Q8TDY4;Q8TDY4-3	Q8TDY4;Q8TDY4-3	ASAP3_HUMAN	ASAP3	Arf-GAP with SH3 domain, ANK repeat and PH domain-containing protein 3	Color2 [A=255, R=169, G=169, B=169]	1	4		13.6935	13.693	13.5791	13.5375	13.6426	13.6671
	0.292003	0.138992	Q9Y576	Q9Y576	ASB1_HUMAN	ASB1	Ankyrin repeat and SOCS box protein 1	Color2 [A=255, R=169, G=169, B=169]	1	4		11.6407	11.6009	11.4871	12.0685	11.6452	11.432
	0.25813	-0.0802952	Q9Y575;Q9Y575-2;Q9Y575-3	Q9Y575;Q9Y575-3;Q9Y575-2	ASB3_HUMAN	ASB3	Ankyrin repeat and SOCS box protein 3	Color2 [A=255, R=169, G=169, B=169]	1	4		14.102	14.4509	14.3293	14.3393	14.0982	14.2039
	0.204763	0.0911983	Q9NWX5	Q9NWX5	ASB6_HUMAN	ASB6	Ankyrin repeat and SOCS box protein 6	Color2 [A=255, R=169, G=169, B=169]	1	4		13.9071	13.6098	13.5493	13.6186	13.6801	14.0411
	0.210183	-0.749754	Q9H765	Q9H765	ASB8_HUMAN	ASB8	Ankyrin repeat and SOCS box protein 8	Color2 [A=255, R=169, G=169, B=169]	1	4		11.5865	12.5911	9.88094	12.7863	10.0404	8.98254
	0.736084	0.838365	Q8N9N2-2	Q8N9N2;Q8N9N2-2	ASCC1_HUMAN	ASCC1	Isoform 2 of Activating signal cointegrator 1 complex subunit 1	Color2 [A=255, R=169, G=169, B=169]	1	4		10.7941	11.5322	12.5109	12.1847	12.4318	12.7358
	0.0101922	0.00298214	Q9H1I8	Q9H1I8	ASCC2_HUMAN	ASCC2	Activating signal cointegrator 1 complex subunit 2	Color2 [A=255, R=169, G=169, B=169]	1	4		13.5796	13.6395	13.6797	13.5117	13.5806	13.8154
	0.121652	-0.0265455	Q8N3C0	Q8N3C0	ASCC3_HUMAN	ASCC3	Activating signal cointegrator 1 complex subunit 3	Color2 [A=255, R=169, G=169, B=169]	1	4		14.4992	14.7082	14.6866	14.693	14.5611	14.5603
	0.395119	-0.261591	Q9Y294	Q9Y294	ASF1A_HUMAN	ASF1A	Histone chaperone ASF1A	Color2 [A=255, R=169, G=169, B=169]	1	4		11.7705	11.2485	11.7779	10.9509	11.3558	11.7054
	0.400896	0.142321	Q9NVP2	Q9NVP2	ASF1B_HUMAN	ASF1B	Histone chaperone ASF1B	Color2 [A=255, R=169, G=169, B=169]	1	4		12.3622	12.4598	12.1822	12.5523	12.2304	12.6484
	0.0788984	-0.0376396	Q9UBL3;Q9UBL3-2;Q9UBL3-3	Q9UBL3;Q9UBL3-3;Q9UBL3-2	ASH2L_HUMAN	ASH2L	Set1/Ash2 histone methyltransferase complex subunit ASH2	Color2 [A=255, R=169, G=169, B=169]	1	4		12.2144	12.1718	12.3774	12.3211	11.9099	12.4196
	0.189438	-0.132204	O95671	O95671;O95671-2;O95671-3	ASML_HUMAN	ASMTL	Probable bifunctional dTTP/UTP pyrophosphatase/methyltransferase protein	Color2 [A=255, R=169, G=169, B=169]	1	4		11.5337	12.0033	11.4202	11.3115	11.3319	11.9172
	0.761642	0.0282408	P08243;P08243-2	P08243;P08243-2;P08243-3	ASNS_HUMAN	ASNS	Asparagine synthetase [glutamine-hydrolyzing]	Color2 [A=255, R=169, G=169, B=169]	1	4		17.1542	17.1698	17.1787	17.2197	17.1668	17.2009
	0.199532	0.0270106	Q9NWL6	Q9NWL6	ASND1_HUMAN	ASNSD1	Asparagine synthetase domain-containing protein 1	Color2 [A=255, R=169, G=169, B=169]	1	4		14.4754	14.4132	14.4168	14.4735	14.5392	14.3738
	0.610145	0.19705	Q8IZT6	Q8IZT6;Q8IZT6-2	ASPM_HUMAN	ASPM	Abnormal spindle-like microcephaly-associated protein	Color2 [A=255, R=169, G=169, B=169]	1	4		13.2967	12.9788	13.2282	13.5757	13.3004	13.2188
	0.0849798	-0.396642	Q53RT3;Q53RT3-2	Q53RT3;Q53RT3-2	APRV1_HUMAN	ASPRV1	Retroviral-like aspartic protease 1	Color2 [A=255, R=169, G=169, B=169]	1	4		9.72918	13.0915	13.4179	12.699	12.9816	9.36809
	0.52656	0.4137	Q9BZE9;Q9BZE9-2;Q9BZE9-3	Q9BZE9;Q9BZE9-2;Q9BZE9-3;Q9BZE9-4	ASPC1_HUMAN	ASPSCR1	Tether containing UBX domain for GLUT4	Color2 [A=255, R=169, G=169, B=169]	1	4		10.7755	10.7202	11.4385	11.0087	11.2856	11.881
	0.415752	0.276259	Q7L266;Q7L266-2	Q7L266;Q7L266-2	ASGL1_HUMAN	ASRGL1	Isoaspartyl peptidase/L-asparaginase	Color2 [A=255, R=169, G=169, B=169]	1	4		11.801	12.6163	12.5358	12.7202	12.3693	12.6924
	0.274414	0.0750561	P00966	P00966	ASSY_HUMAN	ASS1	Argininosuccinate synthase	Color2 [A=255, R=169, G=169, B=169]	1	4		14.6181	14.7196	14.4179	14.6347	14.7829	14.5631
	0.478969	0.412553	Q8IXJ9	Q8IXJ9;Q8IXJ9-2	ASXL1_HUMAN	ASXL1	Polycomb group protein ASXL1	Color2 [A=255, R=169, G=169, B=169]	1	4		12.214	11.4273	11.2415	12.4024	11.6251	12.0928
	0.787258	-0.813693	Q76L83	Q76L83;Q76L83-2	ASXL2_HUMAN	ASXL2	Putative Polycomb group protein ASXL2	Color2 [A=255, R=169, G=169, B=169]	1	4		9.93876	10.7267	9.97626	8.60034	9.72911	9.87122
	0.649237	-0.525395	Q8NBU5	Q8NBU5;Q8NBU5-2	ATAD1_HUMAN	ATAD1	Outer mitochondrial transmembrane helix translocase	Color2 [A=255, R=169, G=169, B=169]	1	4		12.8428	12.6937	12.7204	11.5255	12.7392	12.416
	0.166886	-0.0342512	Q9NVI7-2	Q9NVI7;Q9NVI7-2;Q9NVI7-3	ATD3A_HUMAN	ATAD3A	Isoform 2 of ATPase family AAA domain-containing protein 3A	Color2 [A=255, R=169, G=169, B=169]	1	4		14.6138	14.4674	14.5221	14.4176	14.4555	14.6274
	0.357532	0.74173	Q5T9A4	Q5T9A4;Q5T9A4-3	ATD3B_HUMAN	ATAD3B	ATPase family AAA domain-containing protein 3B	Color2 [A=255, R=169, G=169, B=169]	1	4		9.93187	11.9242	12.1875	11.1129	12.6299	12.526
	0.138893	-0.0739034	Q5SQI0;Q5SQI0-4;Q5SQI0-5	Q5SQI0;Q5SQI0-3;Q5SQI0-4;Q5SQI0-5;Q5SQI0-6;Q5SQI0-7	ATAT_HUMAN	ATAT1	Alpha-tubulin N-acetyltransferase 1	Color2 [A=255, R=169, G=169, B=169]	1	4		15.7697	15.1626	15.2745	15.4259	15.3476	15.2115
	1.09619	0.208523	Q6VMQ6;Q6VMQ6-4;Q6VMQ6-5	Q6VMQ6;Q6VMQ6-2;Q6VMQ6-4;Q6VMQ6-5	MCAF1_HUMAN	ATF7IP	Activating transcription factor 7-interacting protein 1	Color2 [A=255, R=169, G=169, B=169]	1	4		13.0812	12.8604	12.9462	13.2396	13.2268	13.0469
	0.126264	0.0486434	Q2TAZ0;Q2TAZ0-3	Q2TAZ0;Q2TAZ0-3;Q2TAZ0-5	ATG2A_HUMAN	ATG2A	Autophagy-related protein 2 homolog A	Color2 [A=255, R=169, G=169, B=169]	1	4		13.3628	13.7349	13.6805	13.7528	13.6859	13.4854
	0.298435	0.0614955	Q96BY7	Q96BY7	ATG2B_HUMAN	ATG2B	Autophagy-related protein 2 homolog B	Color2 [A=255, R=169, G=169, B=169]	1	4		14.5506	14.4933	14.475	14.4442	14.7189	14.5403
	0.513536	0.198444	Q9NT62	Q9NT62;Q9NT62-2	ATG3_HUMAN	ATG3	Ubiquitin-like-conjugating enzyme ATG3	Color2 [A=255, R=169, G=169, B=169]	1	4		15.7838	15.3639	15.6591	15.6283	15.7552	16.0186
	0.154573	0.12447	Q9H1Y0	Q9H1Y0;Q9H1Y0-2	ATG5_HUMAN	ATG5	Autophagy protein 5	Color2 [A=255, R=169, G=169, B=169]	1	4		12.0836	11.2733	12.2068	12.0779	11.843	12.0162
	1.79361	-0.248513	O95352	O95352;O95352-2;O95352-3	ATG7_HUMAN	ATG7	Ubiquitin-like modifier-activating enzyme ATG7	Color2 [A=255, R=169, G=169, B=169]	1	4		12.1953	12.3656	12.3189	12.0301	12.1126	11.9916
	0.588492	0.249425	Q7Z3C6;Q7Z3C6-2	Q7Z3C6;Q7Z3C6-2	ATG9A_HUMAN	ATG9A	Autophagy-related protein 9A	Color2 [A=255, R=169, G=169, B=169]	1	4		11.3523	11.5726	11.0281	11.3636	11.7058	11.6319
	1.08592	0.199364	P31939	P31939;P31939-2	PUR9_HUMAN	ATIC	Bifunctional purine biosynthesis protein ATIC	Color2 [A=255, R=169, G=169, B=169]	1	4		16.4726	16.3057	16.5817	16.6491	16.5996	16.7095
	0.155249	0.247985	Q8WXF7;Q8WXF7-2	Q8WXF7;Q8WXF7-2	ATLA1_HUMAN	ATL1	Atlastin-1	Color2 [A=255, R=169, G=169, B=169]	1	4		8.66041	9.42965	9.26113	8.43057	10.3351	9.32947
	0.0760988	0.0636861	Q8NHH9;Q8NHH9-5	Q8NHH9;Q8NHH9-2;Q8NHH9-3;Q8NHH9-4;Q8NHH9-5	ATLA2_HUMAN	ATL2	Atlastin-2	Color2 [A=255, R=169, G=169, B=169]	1	4		12.3685	12.781	13.2504	12.8874	12.5974	13.1062
	0.165891	0.0710211	Q6DD88	Q6DD88	ATLA3_HUMAN	ATL3	Atlastin-3	Color2 [A=255, R=169, G=169, B=169]	1	4		12.9746	12.8771	12.6762	12.9197	12.6763	13.145
	0.0142496	0.0031449	Q13315	Q13315	ATM_HUMAN	ATM	Serine-protein kinase ATM	Color2 [A=255, R=169, G=169, B=169]	1	4		12.6979	12.8966	12.7802	12.7759	12.7281	12.8801
	0.816207	0.236324	Q9Y2G3	Q9Y2G3	AT11B_HUMAN	ATP11B	Phospholipid-transporting ATPase IF	Color2 [A=255, R=169, G=169, B=169]	1	4		13.1565	12.9571	12.8676	13.3553	13.3098	13.0251
	0.467093	-0.1827	Q9HD20;Q9HD20-2	Q9HD20;Q9HD20-2	AT131_HUMAN	ATP13A1	Endoplasmic reticulum transmembrane helix translocase	Color2 [A=255, R=169, G=169, B=169]	1	4		11.5422	11.4329	11.4456	11.5443	10.9793	11.3491
	0.0190926	-0.00585747	P05023;P05023-4	P05023;P13637;P20648;P50993;P54707;Q13733;P05023-2;P05023-3;P05023-4;P13637-2;P13637-3;P54707-2	AT1A1_HUMAN	ATP1A1	Sodium/potassium-transporting ATPase subunit alpha-1	Color2 [A=255, R=169, G=169, B=169]	1	4		14.2202	14.4272	14.2804	14.3118	14.1582	14.4401
	0.180192	0.0771418	P05026;P05026-2	P05026;P05026-2	AT1B1_HUMAN	ATP1B1	Sodium/potassium-transporting ATPase subunit beta-1	Color2 [A=255, R=169, G=169, B=169]	1	4		12.6409	13.1766	13.0335	12.9685	13.0525	13.0615
	0.509475	-0.116062	P54709	P54709	AT1B3_HUMAN	ATP1B3	Sodium/potassium-transporting ATPase subunit beta-3	Color2 [A=255, R=169, G=169, B=169]	1	4		12.7174	12.6143	12.385	12.4852	12.4589	12.4244
	0.876921	-0.187051	P16615	P16615;Q93084;P16615-2;P16615-3;P16615-4;P16615-5;Q93084-1;Q93084-3;Q93084-4;Q93084-5;Q93084-6;Q93084-7	AT2A2_HUMAN	ATP2A2	Sarcoplasmic/endoplasmic reticulum calcium ATPase 2	Color2 [A=255, R=169, G=169, B=169]	1	4		13.7074	13.6083	13.6499	13.6462	13.3214	13.4368
	0.711984	0.823878	P20020;P20020-1;P20020-2;P20020-4;P20020-5;P20020-6	P20020;P23634;P23634-2;P23634-3;P23634-4;P23634-5;P23634-6;P23634-7;P23634-8;P20020-1;P20020-2;P20020-4;P20020-5;P20020-6	AT2B1_HUMAN	ATP2B1	Plasma membrane calcium-transporting ATPase 1	Color2 [A=255, R=169, G=169, B=169]	1	4		9.0964	10.4565	9.55287	10.2551	10.1096	11.2127
	0.910841	-0.0713647	P25705	P25705;P25705-2	ATPA_HUMAN	ATP5F1A	ATP synthase subunit alpha, mitochondrial	Color2 [A=255, R=169, G=169, B=169]	1	4		18.5959	18.5843	18.5715	18.4633	18.492	18.5824
	0.50002	0.0288194	P06576	P06576	ATPB_HUMAN	ATP5F1B	ATP synthase subunit beta, mitochondrial	Color2 [A=255, R=169, G=169, B=169]	1	4		17.9866	18.0487	17.9646	18.0289	18.0281	18.0295
	0.519753	-0.188217	P36542	P36542;P36542-2	ATPG_HUMAN	ATP5F1C	ATP synthase subunit gamma, mitochondrial	Color2 [A=255, R=169, G=169, B=169]	1	4		13.5179	13.8062	13.6812	13.2448	13.7138	13.4821
	0.0220008	-0.0290613	P56385	P56385	ATP5I_HUMAN	ATP5ME	ATP synthase subunit e, mitochondrial	Color2 [A=255, R=169, G=169, B=169]	1	4		12.4563	12.8539	13.337	12.1388	13.2857	13.1356
	0.266814	-0.116531	P56134;P56134-2;P56134-3;P56134-4	P56134;P56134-2;P56134-3;P56134-4	ATPK_HUMAN	ATP5MF	ATP synthase subunit f, mitochondrial	Color2 [A=255, R=169, G=169, B=169]	1	4		15.3639	15.1828	14.7859	14.9236	15.0464	15.013
	0.265431	-0.102715	O75964	O75964	ATP5L_HUMAN	ATP5MG	ATP synthase subunit g, mitochondrial	Color2 [A=255, R=169, G=169, B=169]	1	4		14.286	14.5949	14.615	14.5607	14.182	14.445
	0.546373	0.524817	Q96IX5	Q96IX5	ATPMK_HUMAN	ATP5MK	ATP synthase membrane subunit K, mitochondrial	Color2 [A=255, R=169, G=169, B=169]	1	4		10.1006	11.1419	11.3351	11.3289	11.0987	11.7245
	0.59002	-0.815988	P24539	P24539	AT5F1_HUMAN	ATP5PB	ATP synthase F(0) complex subunit B1, mitochondrial	Color2 [A=255, R=169, G=169, B=169]	1	4		10.9456	10.9943	11.72	11.0138	9.27582	10.9225
	0.233847	0.32989	O75947;O75947-2	O75947;O75947-2	ATP5H_HUMAN	ATP5PD	ATP synthase subunit d, mitochondrial	Color2 [A=255, R=169, G=169, B=169]	1	4		10.423	11.206	9.51771	10.5356	10.3716	11.2292
	0.0148593	-0.00630887	P48047	P48047	ATPO_HUMAN	ATP5PO	ATP synthase subunit O, mitochondrial	Color2 [A=255, R=169, G=169, B=169]	1	4		14.6798	14.2931	14.2828	14.3448	14.5145	14.3774
	0.162952	0.174406	Q15904	Q15904	VAS1_HUMAN	ATP6AP1	V-type proton ATPase subunit S1	Color2 [A=255, R=169, G=169, B=169]	1	4		10.2778	10.4589	10.7578	9.93318	10.911	11.1736
	0.912355	0.405119	O75787;O75787-2	O75787;O75787-2	RENR_HUMAN	ATP6AP2	Renin receptor	Color2 [A=255, R=169, G=169, B=169]	1	4		12.277	12.0982	12.2249	12.3226	12.9926	12.5003
	0.384623	-0.249863	P61421	P61421	VA0D1_HUMAN	ATP6V0D1	V-type proton ATPase subunit d 1	Color2 [A=255, R=169, G=169, B=169]	1	4		13.2865	13.9748	13.9762	13.2108	13.7093	13.5679
	0.12121	0.0452248	P38606;P38606-2	P38606;P38606-2	VATA_HUMAN	ATP6V1A	V-type proton ATPase catalytic subunit A	Color2 [A=255, R=169, G=169, B=169]	1	4		14.6584	14.588	14.8007	14.68	14.546	14.9568
	0.233492	-0.0365594	P21281	P21281	VATB2_HUMAN	ATP6V1B2	V-type proton ATPase subunit B, brain isoform	Color2 [A=255, R=169, G=169, B=169]	1	4		16.1939	16.0444	16.1123	16.0791	16.0052	16.1567
	0.416791	-0.770522	P21283	P21283	VATC1_HUMAN	ATP6V1C1	V-type proton ATPase subunit C 1	Color2 [A=255, R=169, G=169, B=169]	1	4		10.4229	11.3494	11.581	11.7336	9.45093	9.85718
	0.305511	-0.0960604	Q9Y5K8	Q9Y5K8	VATD_HUMAN	ATP6V1D	V-type proton ATPase subunit D	Color2 [A=255, R=169, G=169, B=169]	1	4		13.5594	13.2609	13.1966	13.3484	13.132	13.2483
	0.680028	0.195677	P36543	P36543;P36543-2	VATE1_HUMAN	ATP6V1E1	V-type proton ATPase subunit E 1	Color2 [A=255, R=169, G=169, B=169]	1	4		15.7213	15.5503	15.4079	15.7339	15.9286	15.604
	0.0164655	-0.0100511	O75348	O75348	VATG1_HUMAN	ATP6V1G1	V-type proton ATPase subunit G 1	Color2 [A=255, R=169, G=169, B=169]	1	4		11.6998	11.887	11.6359	11.4747	11.6206	12.0972
	0.0597477	0.0133251	Q9UI12;Q9UI12-2	Q9UI12;Q9UI12-2	VATH_HUMAN	ATP6V1H	V-type proton ATPase subunit H	Color2 [A=255, R=169, G=169, B=169]	1	4		14.8689	14.9157	14.99	14.8979	14.8444	15.0722
	0.236859	0.235544	Q04656;Q04656-2;Q04656-3;Q04656-5	Q04656;Q04656-5;Q04656-2;Q04656-3	ATP7A_HUMAN	ATP7A	Copper-transporting ATPase 1	Color2 [A=255, R=169, G=169, B=169]	1	4		10.7062	9.54323	10.1022	10.1469	10.1571	10.7542
	0.533907	0.0384509	Q5TC12	Q5TC12;Q5TC12-2;Q5TC12-3	ATPF1_HUMAN	ATPAF1	ATP synthase mitochondrial F1 complex assembly factor 1	Color2 [A=255, R=169, G=169, B=169]	1	4		13.4702	13.4419	13.4038	13.4563	13.4476	13.5273
	0.19431	-0.0246919	Q13535;Q13535-2	Q13535;Q13535-2;Q13535-3	ATR_HUMAN	ATR	Serine/threonine-protein kinase ATR	Color2 [A=255, R=169, G=169, B=169]	1	4		13.9415	13.8547	13.9743	13.8474	13.9611	13.888
	0.376297	-0.0836172	Q8WXE1;Q8WXE1-2;Q8WXE1-3;Q8WXE1-5	Q8WXE1;Q8WXE1-2;Q8WXE1-3;Q8WXE1-5	ATRIP_HUMAN	ATRIP	ATR-interacting protein	Color2 [A=255, R=169, G=169, B=169]	1	4		12.2858	12.189	12.1186	11.9555	12.1817	12.2053
	0.289584	-0.0418886	Q9UBB4	Q9UBB4;Q9UBB4-2	ATX10_HUMAN	ATXN10	Ataxin-10	Color2 [A=255, R=169, G=169, B=169]	1	4		17.7245	17.6553	17.7934	17.6052	17.6896	17.7528
	0.382971	0.132908	Q99700;Q99700-4	Q99700;Q99700-5;Q99700-2;Q99700-4	ATX2_HUMAN	ATXN2	Ataxin-2	Color2 [A=255, R=169, G=169, B=169]	1	4		14.5483	14.2024	14.4534	14.5609	14.3437	14.6982
	1.17454	0.191693	Q8WWM7	Q8WWM7;Q8WWM7-2;Q8WWM7-3;Q8WWM7-4;Q8WWM7-5;Q8WWM7-6;Q8WWM7-7;Q8WWM7-8;Q8WWM7-9	ATX2L_HUMAN	ATXN2L	Ataxin-2-like protein	Color2 [A=255, R=169, G=169, B=169]	1	4		14.2553	14.1266	14.2096	14.3767	14.2796	14.5102
	0.302842	0.0886898	P54252;P54252-1;P54252-4	P54252;P54252-1;P54252-3;P54252-4;P54252-5	ATX3_HUMAN	ATXN3	Ataxin-3	Color2 [A=255, R=169, G=169, B=169]	1	4		12.6701	12.5948	12.8358	12.836	12.9258	12.605
	1.62351	0.450878	Q13825	Q13825;Q13825-2	AUHM_HUMAN	AUH	Methylglutaconyl-CoA hydratase, mitochondrial	Color2 [A=255, R=169, G=169, B=169]	1	4		12.2822	11.9864	12.332	12.536	12.6489	12.7683
	0.229146	0.119921	Q9Y679;Q9Y679-3	Q9Y679;Q9Y679-3	AUP1_HUMAN	AUP1	Lipid droplet-regulating VLDL assembly factor AUP1	Color2 [A=255, R=169, G=169, B=169]	1	4		12.2591	12.2514	12.4123	12.5349	12.0433	12.7043
	0.174341	-0.058205	O14965	O14965	AURKA_HUMAN	AURKA	Aurora kinase A	Color2 [A=255, R=169, G=169, B=169]	1	4		12.7676	12.9747	12.9512	12.675	12.8001	13.0438
	0.0791706	0.0192509	Q96GD4;Q96GD4-5	Q96GD4;Q96GD4-2;Q96GD4-3;Q96GD4-4;Q96GD4-5	AURKB_HUMAN	AURKB	Aurora kinase B	Color2 [A=255, R=169, G=169, B=169]	1	4		13.8397	13.8669	13.9151	13.9083	13.7427	14.0285
	0.18931	-0.0681321	Q8NBF6	Q8NBF6;Q8NBF6-2	AVL9_HUMAN	AVL9	Late secretory pathway protein AVL9 homolog	Color2 [A=255, R=169, G=169, B=169]	1	4		13.7893	13.3469	13.6046	13.6024	13.4296	13.5045
	0.626485	-1.73394	P25311	P25311	ZA2G_HUMAN	AZGP1	Zinc-alpha-2-glycoprotein	Color2 [A=255, R=169, G=169, B=169]	1	4		11.8082	12.2313	13.4431	13.0266	9.91494	9.3393
	0.246432	0.128739	P61769	P61769	B2MG_HUMAN	B2M	Beta-2-microglobulin	Color2 [A=255, R=169, G=169, B=169]	1	4		11.323	11.6041	11.9753	11.7002	11.9286	11.6598
	1.25973	0.271305	O94766;O94766-2	O94766;O94766-2	B3GA3_HUMAN	B3GAT3	Galactosylgalactosylxylosylprotein 3-beta-glucuronosyltransferase 3	Color2 [A=255, R=169, G=169, B=169]	1	4		13.2432	13.3024	13.4375	13.4985	13.764	13.5345
	1.47953	0.440105	Q9NWV8	Q9NWV8;Q9NWV8-3	BABA1_HUMAN	BABAM1	BRISC and BRCA1-A complex member 1	Color2 [A=255, R=169, G=169, B=169]	1	4		12.9396	12.9754	12.6527	13.4799	13.2236	13.1845
	0.404287	-0.190205	Q9NXR7;Q9NXR7-1;Q9NXR7-3;Q9NXR7-4	Q9NXR7;Q9NXR7-1;Q9NXR7-3;Q9NXR7-4	BABA2_HUMAN	BABAM2	BRISC and BRCA1-A complex member 2	Color2 [A=255, R=169, G=169, B=169]	1	4		14.8483	14.9923	15.075	14.7949	15.1006	14.4494
	0.300212	0.528421	P56817;P56817-2;P56817-3;P56817-4	P56817;P56817-2;P56817-3;P56817-4	BACE1_HUMAN	BACE1	Beta-secretase 1	Color2 [A=255, R=169, G=169, B=169]	1	4		9.94331	11.5927	11.0439	12.1384	10.3757	11.6511
	0.70479	0.340339	O14867	O14867	BACH1_HUMAN	BACH1	Transcription regulator protein BACH1	Color2 [A=255, R=169, G=169, B=169]	1	4		10.8907	10.5184	10.7817	10.6938	11.3091	11.209
	0.140666	-0.0598481	O95816	O95816;O95816-2	BAG2_HUMAN	BAG2	BAG family molecular chaperone regulator 2	Color2 [A=255, R=169, G=169, B=169]	1	4		12.9158	12.9354	12.774	12.7923	12.5692	13.0842
	0.73624	0.0490166	Q9UL15;Q9UL15-2	Q9UL15;Q9UL15-2	BAG5_HUMAN	BAG5	BAG family molecular chaperone regulator 5	Color2 [A=255, R=169, G=169, B=169]	1	4		14.6016	14.5994	14.5545	14.6197	14.5976	14.6854
	0.291022	-0.0487773	P46379;P46379-2;P46379-3	P46379;P46379-2;P46379-3;P46379-4;P46379-5	BAG6_HUMAN	BAG6	Large proline-rich protein BAG6	Color2 [A=255, R=169, G=169, B=169]	1	4		17.0104	16.936	16.8224	16.9536	16.8251	16.8438
	0.213782	-0.191823	Q9UQB8;Q9UQB8-2;Q9UQB8-3;Q9UQB8-4;Q9UQB8-5;Q9UQB8-6	Q9UQB8;Q9UQB8-6;Q9UQB8-3;Q9UQB8-4;Q9UQB8-2;Q9UQB8-5	BAIP2_HUMAN	BAIAP2	Brain-specific angiogenesis inhibitor 1-associated protein 2	Color2 [A=255, R=169, G=169, B=169]	1	4		10.8593	11.4922	11.2209	11.1089	10.4397	11.4482
	1.26102	0.211948	Q9UHR4	Q9UHR4	BI2L1_HUMAN	BAIAP2L1	Brain-specific angiogenesis inhibitor 1-associated protein 2-like protein 1	Color2 [A=255, R=169, G=169, B=169]	1	4		13.5187	13.2919	13.3842	13.6903	13.5993	13.541
	0.23791	-0.182225	O75531	O75531	BAF_HUMAN	BANF1	Barrier-to-autointegration factor	Color2 [A=255, R=169, G=169, B=169]	1	4		12.5123	13.3411	13.1426	12.5906	13.1466	12.7122
	0.286772	0.118434	Q8N9N5;Q8N9N5-4;Q8N9N5-5	Q8N9N5;Q8N9N5-2;Q8N9N5-7;Q8N9N5-3;Q8N9N5-4;Q8N9N5-5;Q8N9N5-6	BANP_HUMAN	BANP	Protein BANP	Color2 [A=255, R=169, G=169, B=169]	1	4		12.2839	11.9267	11.7554	12.1345	11.9929	12.194
	3.48583	1.14073	Q92560	Q92560	BAP1_HUMAN	BAP1	Ubiquitin carboxyl-terminal hydrolase BAP1	Color2 [A=255, R=169, G=169, B=169]	1	4		13.8971	13.9782	13.9478	15.1309	15.2186	14.8958
	0.727375	-1.45058	Q8IXM2;Q8IXM2-3	Q8IXM2;Q8IXM2-2;Q8IXM2-3	BAP18_HUMAN	BAP18	Chromatin complexes subunit BAP18	Color2 [A=255, R=169, G=169, B=169]	1	4		13.4788	13.1187	13.4071	12.7964	10.0714	12.7851
	0.214807	0.07842	Q07812;Q07812-2;Q07812-5;Q07812-8	Q07812;Q07812-8;Q07812-2;Q07812-5;Q07812-7	BAX_HUMAN	BAX	Apoptosis regulator BAX	Color2 [A=255, R=169, G=169, B=169]	1	4		13.9037	13.8176	14.1209	13.8079	14.117	14.1525
	0.37186	-0.129897	Q9NRL2;Q9NRL2-2	Q9NRL2;Q9NRL2-2	BAZ1A_HUMAN	BAZ1A	Bromodomain adjacent to zinc finger domain protein 1A	Color2 [A=255, R=169, G=169, B=169]	1	4		12.5244	12.2218	12.2968	12.2206	12.4148	12.0179
	1.00737	0.266318	Q9UIG0;Q9UIG0-2	Q9UIG0;Q9UIG0-2	BAZ1B_HUMAN	BAZ1B	Tyrosine-protein kinase BAZ1B	Color2 [A=255, R=169, G=169, B=169]	1	4		12.5138	12.5333	12.7178	12.99	12.9274	12.6465
	0.0889048	-0.0864604	Q8IWZ6;Q8IWZ6-2	Q8IWZ6;Q8IWZ6-2	BBS7_HUMAN	BBS7	Bardet-Biedl syndrome 7 protein	Color2 [A=255, R=169, G=169, B=169]	1	4		11.3129	11.5452	10.9616	11.2444	10.6385	11.6776
	3.19328	-1.01734	P56945;P56945-2;P56945-3;P56945-5;P56945-6;P56945-7;P56945-8	P56945;P56945-2;P56945-3;P56945-4;P56945-5;P56945-6;P56945-7;P56945-8	BCAR1_HUMAN	BCAR1	Breast cancer anti-estrogen resistance protein 1	Color2 [A=255, R=169, G=169, B=169]	1	4		14.0764	13.7297	13.9169	12.9545	12.8534	12.8632
	0.574967	0.445606	O75934	O75934	SPF27_HUMAN	BCAS2	Pre-mRNA-splicing factor SPF27	Color2 [A=255, R=169, G=169, B=169]	1	4		11.2922	12.0553	12.1305	12.1553	12.6929	11.9667
	0.242028	-0.219733	Q9H6U6;Q9H6U6-2;Q9H6U6-3;Q9H6U6-6;Q9H6U6-7;Q9H6U6-8	Q9H6U6;Q9H6U6-2;Q9H6U6-3;Q9H6U6-6;Q9H6U6-7;Q9H6U6-8	BCAS3_HUMAN	BCAS3	BCAS3 microtubule associated cell migration factor	Color2 [A=255, R=169, G=169, B=169]	1	4		9.84754	10.088	10.2826	10.2869	9.19306	10.079
	0.0104681	-0.00952307	P54687;P54687-2;P54687-3;P54687-4;P54687-5	P54687;P54687-4;P54687-2;P54687-3;P54687-5	BCAT1_HUMAN	BCAT1	Branched-chain-amino-acid aminotransferase, cytosolic	Color2 [A=255, R=169, G=169, B=169]	1	4		10.9637	11.994	11.4536	11.4407	11.4092	11.5329
	0.157253	-0.0609194	Q9P287	Q9P287	BCCIP_HUMAN	BCCIP	BRCA2 and CDKN1A-interacting protein	Color2 [A=255, R=169, G=169, B=169]	1	4		14.1809	14.2263	14.5065	14.2436	14.0646	14.4228
	0.680508	-0.161363	Q9P287-2	Q9P287-2	BCCIP_HUMAN	BCCIP	Isoform 2 of BRCA2 and CDKN1A-interacting protein	Color2 [A=255, R=169, G=169, B=169]	1	4		13.0821	12.8125	12.8173	12.6294	12.8372	12.7612
	0.454818	-0.211432	Q7Z5W3	Q7Z5W3	BN3D2_HUMAN	BCDIN3D	RNA 5'-monophosphate methyltransferase	Color2 [A=255, R=169, G=169, B=169]	1	4		13.8636	13.4111	13.693	13.1455	13.629	13.5588
	1.83081	0.198051	P12694	P12694;P12694-2	ODBA_HUMAN	BCKDHA	2-oxoisovalerate dehydrogenase subunit alpha, mitochondrial	Color2 [A=255, R=169, G=169, B=169]	1	4		15.3371	15.2392	15.1998	15.4267	15.4357	15.5079
	1.21795	0.202682	P21953	P21953	ODBB_HUMAN	BCKDHB	2-oxoisovalerate dehydrogenase subunit beta, mitochondrial	Color2 [A=255, R=169, G=169, B=169]	1	4		13.5732	13.7787	13.8164	13.899	13.9125	13.9648
	2.26366	-0.473503	O14874-2;O14874-3	O14874;O14874-2;O14874-3	BCKD_HUMAN	BCKDK	Isoform 2 of [3-methyl-2-oxobutanoate dehydrogenase [lipoamide]] kinase, mitochondrial	Color2 [A=255, R=169, G=169, B=169]	1	4		12.7892	12.9973	12.9435	12.3286	12.4444	12.5365
	0.0433812	-0.0141859	Q9BXK5;Q9BXK5-2	Q9BXK5;Q9BXK5-2	B2L13_HUMAN	BCL2L13	Bcl-2-like protein 13	Color2 [A=255, R=169, G=169, B=169]	1	4		13.5093	13.4929	13.6565	13.3508	13.6848	13.5806
	0.0486227	0.0251497	Q92843-2	Q86U42;Q86U42-2;Q92843-2	B2CL2_HUMAN	BCL2L2	Isoform 3 of Bcl-2-like protein 2	Color2 [A=255, R=169, G=169, B=169]	1	4		13.6307	13.1362	13.2513	13.4105	13.1809	13.5022
	0.485963	0.261415	Q9NYF8;Q9NYF8-2;Q9NYF8-3	Q9NYF8;Q9NYF8-2;Q9NYF8-3;Q9NYF8-4	BCLF1_HUMAN	BCLAF1	Bcl-2-associated transcription factor 1	Color2 [A=255, R=169, G=169, B=169]	1	4		12.3837	12.66	12.124	12.4241	12.5315	12.9964
	0.0315843	0.0198936	Q6W2J9	Q6W2J9;Q6W2J9-2;Q6W2J9-4	BCOR_HUMAN	BCOR	BCL-6 corepressor	Color2 [A=255, R=169, G=169, B=169]	1	4		12.8184	13.0659	12.6882	13.1672	12.9207	12.5442
	0.176908	-0.0635856	Q5H9F3;Q5H9F3-1;Q5H9F3-4	Q5H9F3;Q5H9F3-1;Q5H9F3-4	BCORL_HUMAN	BCORL1	BCL-6 corepressor-like protein 1	Color2 [A=255, R=169, G=169, B=169]	1	4		12.8682	12.5693	12.867	12.8692	12.5457	12.6988
	0.247471	-0.0922387	Q9Y276	Q9Y276	BCS1_HUMAN	BCS1L	Mitochondrial chaperone BCS1	Color2 [A=255, R=169, G=169, B=169]	1	4		12.9463	12.8746	12.5294	12.8062	12.7087	12.5586
	1.07823	0.204318	Q02338	Q02338	BDH_HUMAN	BDH1	D-beta-hydroxybutyrate dehydrogenase, mitochondrial	Color2 [A=255, R=169, G=169, B=169]	1	4		13.6118	13.5832	13.4908	13.7138	13.9257	13.6593
	0.854655	0.19595	Q9BUT1	Q9BUT1;Q9BUT1-2	DHRS6_HUMAN	BDH2	Dehydrogenase/reductase SDR family member 6	Color2 [A=255, R=169, G=169, B=169]	1	4		14.8367	14.5113	14.592	14.7654	14.8518	14.9106
	0.783837	0.717552	Q14457	Q14457	BECN1_HUMAN	BECN1	Beclin-1	Color2 [A=255, R=169, G=169, B=169]	1	4		9.30155	9.87797	10.1645	10.9847	10.6619	9.85009
	0.594841	0.26183	Q5T5X7	Q5T5X7	BEND3_HUMAN	BEND3	BEN domain-containing protein 3	Color2 [A=255, R=169, G=169, B=169]	1	4		12.7839	12.6109	13.1	13.063	12.8763	13.3411
	0.92009	0.177958	Q96G01-3	Q96G01-3	BICD1_HUMAN	BICD1	Isoform 3 of Protein bicaudal D homolog 1	Color2 [A=255, R=169, G=169, B=169]	1	4		14.6066	14.4566	14.3705	14.5441	14.7405	14.6829
	0.669284	0.249253	Q8TD16;Q8TD16-2	Q8TD16;Q8TD16-2	BICD2_HUMAN	BICD2	Protein bicaudal D homolog 2	Color2 [A=255, R=169, G=169, B=169]	1	4		13.9931	13.4477	13.8717	13.9841	13.9866	14.0895
	0.0197875	0.0226205	Q9NZM4;Q9NZM4-2	Q9NZM4;Q9NZM4-2	BICRA_HUMAN	BICRA	BRD4-interacting chromatin-remodeling complex-associated protein	Color2 [A=255, R=169, G=169, B=169]	1	4		10.7404	11.7475	11.7119	11.1852	11.7978	11.2846
	0.0155754	-0.0387109	P55957;P55957-2	P55957;P55957-2	BID_HUMAN	BID	BH3-interacting domain death agonist	Color2 [A=255, R=169, G=169, B=169]	1	4		9.91627	9.42417	9.70114	11.1035	9.52138	8.30059
	0.188523	-0.173079	O00499;O00499-10;O00499-11;O00499-2;O00499-3;O00499-4;O00499-5;O00499-6;O00499-7;O00499-8;O00499-9	O00499;O00499-10;O00499-11;O00499-2;O00499-3;O00499-4;O00499-5;O00499-6;O00499-7;O00499-8;O00499-9	BIN1_HUMAN	BIN1	Myc box-dependent-interacting protein 1	Color2 [A=255, R=169, G=169, B=169]	1	4		9.78895	10.4059	9.80163	10.287	9.88826	9.30206
	0.688314	-0.777143	Q9NQY0;Q9NQY0-2	Q9NQY0;Q9NQY0-2	BIN3_HUMAN	BIN3	Bridging integrator 3	Color2 [A=255, R=169, G=169, B=169]	1	4		11.0884	11.3303	11.473	9.73202	11.4513	10.377
	0.960002	0.197439	Q13490	Q13489;Q13490;Q13490-2	BIRC2_HUMAN	BIRC2	Baculoviral IAP repeat-containing protein 2	Color2 [A=255, R=169, G=169, B=169]	1	4		13.5331	13.5474	13.4392	13.7313	13.5361	13.8446
	0.345459	-0.0287647	Q9NR09	Q9NR09	BIRC6_HUMAN	BIRC6	Baculoviral IAP repeat-containing protein 6	Color2 [A=255, R=169, G=169, B=169]	1	4		14.4186	14.491	14.4762	14.4384	14.3849	14.4763
	0.289352	0.0646245	P54132	P54132	BLM_HUMAN	BLM	RecQ-like DNA helicase BLM	Color2 [A=255, R=169, G=169, B=169]	1	4		12.6327	12.4	12.3555	12.5693	12.5375	12.4752
	0.0362572	0.0476507	Q13867	Q13867	BLMH_HUMAN	BLMH	Bleomycin hydrolase	Color2 [A=255, R=169, G=169, B=169]	1	4		13.1284	12.8962	13.7571	14.0163	12.813	13.0953
	0.615688	0.941985	Q9NUP1	Q9NUP1	BL1S4_HUMAN	BLOC1S4	Biogenesis of lysosome-related organelles complex 1 subunit 4	Color2 [A=255, R=169, G=169, B=169]	1	4		9.33762	11.4175	11.3645	11.7636	11.5764	11.6056
	0.293803	0.540182	Q14667;Q14667-2;Q14667-3	Q14667;Q14667-2;Q14667-3	BLTP2_HUMAN	BLTP2	Bridge-like lipid transfer protein family member 2	Color2 [A=255, R=169, G=169, B=169]	1	4		16.784	15.8561	15.2979	15.368	17.4206	16.77
	0.576666	0.153084	Q6BDS2	Q6BDS2	BLT3A_HUMAN	BLTP3A	Bridge-like lipid transfer protein family member 3A	Color2 [A=255, R=169, G=169, B=169]	1	4		14.0988	13.8629	13.9806	14.1662	13.9527	14.2827
	1.52101	0.362912	A0JNW5	A0JNW5;A0JNW5-2	BLT3B_HUMAN	BLTP3B	Bridge-like lipid transfer protein family member 3B	Color2 [A=255, R=169, G=169, B=169]	1	4		14.5775	14.2681	14.3822	14.7577	14.6708	14.888
	0.137337	-0.0462691	P53004	P53004	BIEA_HUMAN	BLVRA	Biliverdin reductase A	Color2 [A=255, R=169, G=169, B=169]	1	4		14.1733	14.5591	14.2091	14.248	14.2502	14.3044
	0.0342606	-0.0146929	P30043	P30043	BLVRB_HUMAN	BLVRB	Flavin reductase (NADPH)	Color2 [A=255, R=169, G=169, B=169]	1	4		14.3541	14.5426	14.6897	14.5725	14.3055	14.6644
	0.0309442	-0.0105429	P35226	P35226	BMI1_HUMAN	BMI1	Polycomb complex protein BMI-1	Color2 [A=255, R=169, G=169, B=169]	1	4		11.2518	10.9677	11.1113	10.9724	11.2481	11.0786
	0.112953	0.0674178	Q9NSY1;Q9NSY1-2;Q9NSY1-3	Q9NSY1;Q9NSY1-2;Q9NSY1-3	BMP2K_HUMAN	BMP2K	BMP-2-inducible protein kinase	Color2 [A=255, R=169, G=169, B=169]	1	4		12.7457	12.3369	12.0598	12.3616	12.3656	12.6174
	0.291697	0.230674	Q14692	Q14692	BMS1_HUMAN	BMS1	Ribosome biogenesis protein BMS1 homolog	Color2 [A=255, R=169, G=169, B=169]	1	4		8.85565	9.81823	9.47091	9.87427	9.34686	9.61568
	0.464416	-0.196088	Q12982;Q12982-2	Q12982;Q12982-2	BNIP2_HUMAN	BNIP2	BCL2/adenovirus E1B 19 kDa protein-interacting protein 2	Color2 [A=255, R=169, G=169, B=169]	1	4		11.4723	11.8862	11.8938	11.7165	11.6227	11.3249
	1.02687	-0.381861	Q9H3K6	Q9H3K6	BOLA2_HUMAN	BOLA2	BolA-like protein 2	Color2 [A=255, R=169, G=169, B=169]	1	4		13.2784	13.6887	13.2344	12.9733	12.8766	13.2061
	1.88337	0.21028	Q14137	Q14137;Q14137-2	BOP1_HUMAN	BOP1	Ribosome biogenesis protein BOP1	Color2 [A=255, R=169, G=169, B=169]	1	4		14.5255	14.4568	14.512	14.7257	14.6238	14.7757
	0.248396	0.210156	Q969J3	Q969J3	BORC5_HUMAN	BORCS5	BLOC-1-related complex subunit 5	Color2 [A=255, R=169, G=169, B=169]	1	4		11.6363	11.7282	12.5268	12.2464	12.4423	11.8331
	0.172919	-0.13326	Q96GS4	Q96GS4	BORC6_HUMAN	BORCS6	BLOC-1-related complex subunit 6	Color2 [A=255, R=169, G=169, B=169]	1	4		11.4947	11.3692	11.3809	11.6651	10.7154	11.4646
	0.330687	-0.3992	O95861;O95861-3;O95861-4	O95861;O95861-3;O95861-4	BPNT1_HUMAN	BPNT1	3'(2'),5'-bisphosphate nucleotidase 1	Color2 [A=255, R=169, G=169, B=169]	1	4		11.0115	10.8446	11.0728	11.1856	10.9436	9.60215
	0.051755	-0.0164951	Q12830;Q12830-2;Q12830-4	Q12830;Q12830-2;Q12830-4	BPTF_HUMAN	BPTF	Nucleosome-remodeling factor subunit BPTF	Color2 [A=255, R=169, G=169, B=169]	1	4		14.3528	14.1642	14.0901	14.2417	14.034	14.2819
	0.82931	-0.22491	P15056	P15056	BRAF_HUMAN	BRAF	Serine/threonine-protein kinase B-raf	Color2 [A=255, R=169, G=169, B=169]	1	4		13.0134	13.369	13.2447	12.8433	13.0553	13.0538
	0.0398584	0.0144507	Q7Z569	Q7Z569;Q7Z569-2	BRAP_HUMAN	BRAP	BRCA1-associated protein	Color2 [A=255, R=169, G=169, B=169]	1	4		12.7209	12.3495	12.6112	12.4888	12.6779	12.5582
	0.0209199	0.00481669	Q6PJG6	Q6PJG6;Q6PJG6-2	BRAT1_HUMAN	BRAT1	BRCA1-associated ATM activator 1	Color2 [A=255, R=169, G=169, B=169]	1	4		15.2663	15.4169	15.4906	15.3827	15.3359	15.4697
	0.735979	0.135252	P51587	P51587	BRCA2_HUMAN	BRCA2	Breast cancer type 2 susceptibility protein	Color2 [A=255, R=169, G=169, B=169]	1	4		12.2538	11.9931	12.1787	12.2238	12.3376	12.2699
	0.844401	-0.146443	P46736;P46736-2;P46736-3	P46736;P46736-2;P46736-3;P46736-4;P46736-5	BRCC3_HUMAN	BRCC3	Lys-63-specific deubiquitinase BRCC36	Color2 [A=255, R=169, G=169, B=169]	1	4		13.6361	13.6236	13.5454	13.5795	13.467	13.3193
	0.497382	0.865508	O60885	O60885	BRD4_HUMAN	BRD4	Bromodomain-containing protein 4	Color2 [A=255, R=169, G=169, B=169]	1	4		9.71701	12.2901	11.3242	12.1088	12.0781	11.7409
	0.0156694	-0.00645669	Q9H0E9-2	Q9H0E9;Q9H0E9-2;Q9H0E9-4	BRD8_HUMAN	BRD8	Isoform 2 of Bromodomain-containing protein 8	Color2 [A=255, R=169, G=169, B=169]	1	4		14.3425	13.9287	14.204	14.169	14.0367	14.2501
	0.0895818	-0.0842978	Q9H8M2-6	Q9H8M2;Q9H8M2-1;Q9H8M2-2;Q9H8M2-3;Q9H8M2-6	BRD9_HUMAN	BRD9	Isoform 6 of Bromodomain-containing protein 9	Color2 [A=255, R=169, G=169, B=169]	1	4		12.246	12.041	11.2977	11.705	12.1022	11.5245
	0.544174	0.340276	Q9H8M2;Q9H8M2-1;Q9H8M2-3	Q9H8M2;Q9H8M2-1;Q9H8M2-3;Q9H8M2-4	BRD9_HUMAN	BRD9	Bromodomain-containing protein 9	Color2 [A=255, R=169, G=169, B=169]	1	4		9.90778	9.57976	9.56945	10.1477	9.53967	10.3905
	0.341047	-0.638701	Q92994;Q92994-3;Q92994-5;Q92994-7;Q92994-8;Q92994-9	Q92994;Q92994-3;Q92994-5;Q92994-7;Q92994-8;Q92994-9	TF3B_HUMAN	BRF1	Transcription factor IIIB 90 kDa subunit	Color2 [A=255, R=169, G=169, B=169]	1	4		9.62581	10.5995	11.2098	9.06515	11.0708	9.38302
	0.622695	0.157146	Q9BX63	Q9BX63;Q9BX63-2	FANCJ_HUMAN	BRIP1	Fanconi anemia group J protein	Color2 [A=255, R=169, G=169, B=169]	1	4		12.7832	12.8205	12.4922	12.7691	12.9256	12.8727
	0.250195	0.104811	Q8TDN6	Q8TDN6	BRX1_HUMAN	BRIX1	Ribosome biogenesis protein BRX1 homolog	Color2 [A=255, R=169, G=169, B=169]	1	4		11.9565	12.0535	12.4135	12.426	12.1368	12.175
	0.0785775	0.0252984	Q9HCU9	Q9HCU9	BRMS1_HUMAN	BRMS1	Breast cancer metastasis-suppressor 1	Color2 [A=255, R=169, G=169, B=169]	1	4		11.5173	11.7273	11.4271	11.7157	11.476	11.5558
	0.0704981	-0.138918	Q5PSV4;Q5PSV4-2	Q5PSV4;Q5PSV4-2	BRM1L_HUMAN	BRMS1L	Breast cancer metastasis-suppressor 1-like protein	Color2 [A=255, R=169, G=169, B=169]	1	4		11.0573	10.223	10.1783	10.1873	9.34929	11.5053
	0.513438	-0.557863	Q5VW32;Q5VW32-2	Q5VW32;Q5VW32-2	BROX_HUMAN	BROX	BRO1 domain-containing protein BROX	Color2 [A=255, R=169, G=169, B=169]	1	4		10.0777	10.6547	9.08241	9.17591	9.61261	9.35265
	0.0427432	0.0141207	Q8IWQ3-4	Q8IWQ3;Q8TDC3;Q8IWQ3-2;Q8IWQ3-3;Q8IWQ3-4;Q8TDC3-2;Q8TDC3-3	BRSK2_HUMAN	BRSK2	Isoform 4 of Serine/threonine-protein kinase BRSK2	Color2 [A=255, R=169, G=169, B=169]	1	4		13.7664	13.3986	13.6086	13.5406	13.6086	13.6668
	0.840996	0.149699	P35613;P35613-2	P35613;P35613-2;P35613-3;P35613-4	BASI_HUMAN	BSG	Basigin	Color2 [A=255, R=169, G=169, B=169]	1	4		12.7724	12.632	12.8679	12.865	12.9993	12.8571
	0.231238	-0.192901	Q10589;Q10589-2	Q10589;Q10589-2	BST2_HUMAN	BST2	Bone marrow stromal antigen 2	Color2 [A=255, R=169, G=169, B=169]	1	4		12.4174	11.8081	12.628	11.6603	12.2891	12.3254
	0.0346928	-0.00581487	O14981	O14981;O14981-2	BTAF1_HUMAN	BTAF1	TATA-binding protein-associated factor 172	Color2 [A=255, R=169, G=169, B=169]	1	4		13.7193	13.821	13.8641	13.816	13.7238	13.8472
	0.054731	0.039279	Q9P203;Q9P203-5	Q9P203;Q9P203-5	BTBD7_HUMAN	BTBD7	BTB/POZ domain-containing protein 7	Color2 [A=255, R=169, G=169, B=169]	1	4		10.6074	10.4839	9.91492	10.1988	10.3073	10.618
	0.69728	0.264396	P20290-2	P20290;P20290-2	BTF3_HUMAN	BTF3	Isoform 2 of Transcription factor BTF3	Color2 [A=255, R=169, G=169, B=169]	1	4		13.4264	12.9839	12.9502	13.2307	13.4965	13.4265
	0.273993	-0.0950816	O43683;O43683-2;O43683-3	O43683;O43683-2;O43683-3	BUB1_HUMAN	BUB1	Mitotic checkpoint serine/threonine-protein kinase BUB1	Color2 [A=255, R=169, G=169, B=169]	1	4		13.7585	13.3825	13.6299	13.3498	13.492	13.6438
	1.15824	-0.0518417	O60566;O60566-3	O60566;O60566-2;O60566-3	BUB1B_HUMAN	BUB1B	Mitotic checkpoint serine/threonine-protein kinase BUB1 beta	Color2 [A=255, R=169, G=169, B=169]	1	4		14.4868	14.4282	14.4301	14.4018	14.3797	14.408
	0.603861	0.0389134	O43684;O43684-2	O43684;O43684-2	BUB3_HUMAN	BUB3	Mitotic checkpoint protein BUB3	Color2 [A=255, R=169, G=169, B=169]	1	4		15.921	15.9805	15.8905	15.9531	15.992	15.9636
	0.891612	0.155454	P41223	P41223;P41223-2	BUD31_HUMAN	BUD31	Protein BUD31 homolog	Color2 [A=255, R=169, G=169, B=169]	1	4		13.0998	13.1324	13.1322	13.1605	13.4316	13.2387
	0.74501	0.140114	Q13895	Q13895	BYST_HUMAN	BYSL	Bystin	Color2 [A=255, R=169, G=169, B=169]	1	4		14.4517	14.4221	14.4026	14.702	14.5856	14.4091
	0.744908	-0.146786	Q7L1Q6;Q7L1Q6-3;Q7L1Q6-4	Q7L1Q6;Q7L1Q6-2;Q7L1Q6-3;Q7L1Q6-4	5MP2_HUMAN	BZW1	eIF5-mimic protein 2	Color2 [A=255, R=169, G=169, B=169]	1	4		16.8537	16.9933	16.9895	16.6815	16.9463	16.7684
	0.266882	0.0429649	Q9Y6E2	Q9Y6E2	5MP1_HUMAN	BZW2	eIF5-mimic protein 1	Color2 [A=255, R=169, G=169, B=169]	1	4		16.6389	16.8187	16.6289	16.7112	16.7307	16.7735
	0.813234	1.15249	E9PRG8	E9PRG8	CK098_HUMAN	C11orf98	Uncharacterized protein C11orf98	Color2 [A=255, R=169, G=169, B=169]	1	4		9.52458	11.475	11.3476	11.6328	12.2636	11.9083
	0.899041	0.104523	Q6ZRI6;Q6ZRI6-2	Q6ZRI6;Q6ZRI6-2	CO039_HUMAN	C15orf39	Uncharacterized protein C15orf39	Color2 [A=255, R=169, G=169, B=169]	1	4		12.5029	12.6017	12.5907	12.5941	12.7476	12.6672
	0.275181	-0.0620524	Q9HAS0	Q9HAS0	NJMU_HUMAN	C17orf75	Protein Njmu-R1	Color2 [A=255, R=169, G=169, B=169]	1	4		12.3594	12.5318	12.3868	12.3465	12.247	12.4982
	0.371393	0.177282	Q8N9M1;Q8N9M1-2;Q8N9M1-3	Q8N9M1;Q8N9M1-2;Q8N9M1-3	CS047_HUMAN	C19orf47	Uncharacterized protein C19orf47	Color2 [A=255, R=169, G=169, B=169]	1	4		11.2538	11.3513	11.8727	11.7412	11.5614	11.707
	0.149171	0.0993525	P02745	P02745	C1QA_HUMAN	C1QA	Complement C1q subcomponent subunit A	Color2 [A=255, R=169, G=169, B=169]	1	4		18.8409	18.3667	18.1345	18.3454	18.8044	18.4905
	0.346525	-0.154807	P02746	P02746	C1QB_HUMAN	C1QB	Complement C1q subcomponent subunit B	Color2 [A=255, R=169, G=169, B=169]	1	4		18.4496	18.2979	17.9897	17.8991	18.3296	18.044
	0.881295	-0.626004	Q07021	Q07021	C1QBP_HUMAN	C1QBP	Complement component 1 Q subcomponent-binding protein, mitochondrial	Color2 [A=255, R=169, G=169, B=169]	1	4		12.7239	13.3369	12.6662	12.7495	12.214	11.8854
	0.151385	-0.170514	P00736	P00736	C1R_HUMAN	C1R	Complement C1r subcomponent	Color2 [A=255, R=169, G=169, B=169]	1	4		12.6688	12.8359	11.7843	12.075	12.7814	11.9211
	0.952436	3.62377	Q4AC94;Q4AC94-1;Q4AC94-3;Q4AC94-4	Q4AC94;Q4AC94-1;Q4AC94-3;Q4AC94-4	C2CD3_HUMAN	C2CD3	C2 domain-containing protein 3	Color2 [A=255, R=169, G=169, B=169]	1	4		9.5261	9.0227	9.76697	14.5657	15.0808	9.54058
	0.94189	-0.600554	Q8TF44	Q8TF44	C2C4C_HUMAN	C2CD4C	C2 calcium-dependent domain-containing protein 4C	Color2 [A=255, R=169, G=169, B=169]	1	4		12.7725	13.0561	13.199	12.9086	11.9792	12.3382
	0.384907	-0.276069	Q9BVC5;Q9BVC5-2	Q9BVC5;Q9BVC5-2	ASHWN_HUMAN	C2orf49	Ashwin	Color2 [A=255, R=169, G=169, B=169]	1	4		11.2516	10.9862	10.7528	10.3051	11.2142	10.6431
	0.390027	-0.14751	P01024	P01024	CO3_HUMAN	C3	Complement C3	Color2 [A=255, R=169, G=169, B=169]	1	4		15.9626	15.7335	15.6361	15.6402	15.8441	15.4054
	0.0723915	-0.0190347	P0C0L4	P0C0L4;P0C0L5;P0C0L4-2	CO4A_HUMAN	C4A	Complement C4-A	Color2 [A=255, R=169, G=169, B=169]	1	4		15.3957	15.3887	15.4131	15.4624	15.4813	15.1967
	0.983871	-0.193414	P01031	P01031	CO5_HUMAN	C5	Complement C5	Color2 [A=255, R=169, G=169, B=169]	1	4		12.878	13.116	13.1037	12.8393	12.7524	12.9258
	0.16957	0.120711	Q96MH7	Q96MH7	CE034_HUMAN	C5orf34	Uncharacterized protein C5orf34	Color2 [A=255, R=169, G=169, B=169]	1	4		12.6773	12.4527	12.3696	12.7628	12.1294	12.9695
	0.0562612	-0.0253668	P10643	P10643	CO7_HUMAN	C7	Complement component C7	Color2 [A=255, R=169, G=169, B=169]	1	4		14.5351	14.4288	14.7319	14.4884	14.3485	14.7826
	0.890086	0.548917	Q9BRJ6	Q9BRJ6	CG050_HUMAN	C7orf50	Uncharacterized protein C7orf50	Color2 [A=255, R=169, G=169, B=169]	1	4		12.3855	11.4897	11.7883	12.5138	12.5862	12.2102
	0.582415	0.200082	P07358	P07358	CO8B_HUMAN	C8B	Complement component C8 beta chain	Color2 [A=255, R=169, G=169, B=169]	1	4		13.2224	13.4915	13.4571	13.8147	13.5842	13.3723
	1.08655	0.49399	Q9H7E9;Q9H7E9-2	Q9H7E9;Q9H7E9-2	CH033_HUMAN	C8orf33	UPF0488 protein C8orf33	Color2 [A=255, R=169, G=169, B=169]	1	4		12.4152	11.7793	12.3788	12.6368	12.6209	12.7976
	1.08317	0.27547	P02748	P02748	CO9_HUMAN	C9	Complement component C9	Color2 [A=255, R=169, G=169, B=169]	1	4		14.3785	14.4663	14.6855	14.7685	14.6611	14.927
	0.84286	-0.132948	Q96LT7	Q96LT7	CI072_HUMAN	C9orf72	Guanine nucleotide exchange factor C9orf72	Color2 [A=255, R=169, G=169, B=169]	1	4		11.284	11.1635	11.2453	11.0923	11.2117	10.9901
	0.223357	-0.15073	P00918	P00918	CAH2_HUMAN	CA2	Carbonic anhydrase 2	Color2 [A=255, R=169, G=169, B=169]	1	4		13.1103	13.2225	12.3845	12.7842	12.7676	12.7132
	0.252126	0.403175	Q9H8G2	Q9H8G2	CAAP1_HUMAN	CAAP1	Caspase activity and apoptosis inhibitor 1	Color2 [A=255, R=169, G=169, B=169]	1	4		10.0424	8.32673	9.88723	9.60592	10.4512	9.40871
	0.617961	-0.195538	Q9Y376	Q9Y376;Q9H9S4	CAB39_HUMAN	CAB39	Calcium-binding protein 39	Color2 [A=255, R=169, G=169, B=169]	1	4		14.1831	14.0102	14.3012	14.1976	13.8435	13.8668
	0.00233463	-0.00130526	Q9Y6J0	Q9Y6J0;Q9Y6J0-2	CABIN_HUMAN	CABIN1	Calcineurin-binding protein cabin-1	Color2 [A=255, R=169, G=169, B=169]	1	4		13.3944	12.9658	12.9061	13.0117	12.9679	13.2828
	0.588033	0.225919	O00555-3;O00555-4	O00555-3;O00555-4	CAC1A_HUMAN	CACNA1A	Isoform 3 of Voltage-dependent P/Q-type calcium channel subunit alpha-1A	Color2 [A=255, R=169, G=169, B=169]	1	4		10.7958	11.2796	11.0375	11.0651	11.3484	11.3771
	0.432138	0.50667	Q8IZS8	Q8IZS8	CA2D3_HUMAN	CACNA2D3	Voltage-dependent calcium channel subunit alpha-2/delta-3	Color2 [A=255, R=169, G=169, B=169]	1	4		9.75519	9.16908	9.65529	9.09927	10.4475	10.5528
	0.842896	-0.495146	P54284;P54284-2;P54284-3;P54284-4;P54284-5	P54284;P54284-2;P54284-3;P54284-4;P54284-5	CACB3_HUMAN	CACNB3	Voltage-dependent L-type calcium channel subunit beta-3	Color2 [A=255, R=169, G=169, B=169]	1	4		10.5161	10.0557	10.7504	9.58459	10.1053	10.1469
	0.603973	0.109087	Q86Y37	Q86Y37;Q86Y37-2;Q86Y37-4	CACL1_HUMAN	CACUL1	CDK2-associated and cullin domain-containing protein 1	Color2 [A=255, R=169, G=169, B=169]	1	4		12.2541	12.3902	12.3824	12.4305	12.3457	12.5779
	0.0906092	-0.0105769	Q9HB71	Q9HB71;Q9HB71-3	CYBP_HUMAN	CACYBP	Calcyclin-binding protein	Color2 [A=255, R=169, G=169, B=169]	1	4		16.8298	16.9659	16.918	16.9132	16.8726	16.8962
	0.478162	-0.0717093	P27708	P27708	PYR1_HUMAN	CAD	CAD protein	Color2 [A=255, R=169, G=169, B=169]	1	4		17.7487	17.8731	17.9189	17.8412	17.7011	17.7833
	0.122526	-0.0841392	Q86UW7;Q86UW7-2;Q86UW7-3	Q86UW7;Q86UW7-2;Q86UW7-3	CAPS2_HUMAN	CADPS2	Calcium-dependent secretion activator 2	Color2 [A=255, R=169, G=169, B=169]	1	4		10.5782	10.4957	10.9611	10.4214	11.0043	10.357
	0.109758	-0.0927375	P0DP23;P0DP24;P0DP25	P0DP23;P0DP24;P0DP25	CALM1_HUMAN;CALM2_HUMAN;CALM3_HUMAN	CALM1;CALM2;CALM3	Calmodulin-1	Color2 [A=255, R=169, G=169, B=169]	1	4		12.4733	11.5659	11.6284	11.803	11.9458	11.6406
	0.188771	-0.256804	Q9NZT1	Q9NZT1	CALL5_HUMAN	CALML5	Calmodulin-like protein 5	Color2 [A=255, R=169, G=169, B=169]	1	4		9.65547	11.193	10.5801	10.7358	9.847	10.0753
	0.206406	-0.070233	P27797	P27797	CALR_HUMAN	CALR	Calreticulin	Color2 [A=255, R=169, G=169, B=169]	1	4		11.291	11.7256	11.4787	11.4898	11.3579	11.437
	0.223789	-0.257963	O43852-2;O43852-4	O43852;O43852-10;O43852-11;O43852-12;O43852-13;O43852-14;O43852-2;O43852-3;O43852-4;O43852-5;O43852-6;O43852-7;O43852-8;O43852-9	CALU_HUMAN	CALU	Isoform 2 of Calumenin	Color2 [A=255, R=169, G=169, B=169]	1	4		13.181	13.2075	12.371	11.9943	13.2142	12.7772
	0.0398336	0.0170829	Q8IU85;Q8IU85-2	Q8IU85;Q8IU85-2	KCC1D_HUMAN	CAMK1D	Calcium/calmodulin-dependent protein kinase type 1D	Color2 [A=255, R=169, G=169, B=169]	1	4		12.9843	12.6403	12.874	12.8438	12.6717	13.0343
	0.223009	0.0374921	Q13557;Q13557-10;Q13557-11;Q13557-12;Q13557-6;Q13557-8	Q13554;Q13554-3;Q13555;Q13555-5;Q13557;Q13557-8;Q13554-2;Q13554-4;Q13554-5;Q13554-6;Q13554-7;Q13554-8;Q13555-10;Q13555-11;Q13555-2;Q13555-3;Q13555-4;Q13555-6;Q13555-7;Q13555-8;Q13555-9;Q13557-10;Q13557-11;Q13557-12;Q13557-3;Q13557-4;Q13557-5;Q13557-6;Q13557-9	KCC2D_HUMAN	CAMK2D	Calcium/calmodulin-dependent protein kinase type II subunit delta	Color2 [A=255, R=169, G=169, B=169]	1	4		14.6063	14.46	14.3924	14.5449	14.488	14.5383
	0.359573	-0.0736729	Q13555;Q13555-10;Q13555-11;Q13555-2;Q13555-3;Q13555-4;Q13555-5;Q13555-6;Q13555-7;Q13555-8;Q13555-9	Q13555;Q13555-5;Q13555-10;Q13555-11;Q13555-2;Q13555-3;Q13555-4;Q13555-6;Q13555-7;Q13555-8;Q13555-9	KCC2G_HUMAN	CAMK2G	Calcium/calmodulin-dependent protein kinase type II subunit gamma	Color2 [A=255, R=169, G=169, B=169]	1	4		13.7392	13.8918	13.7527	13.6865	13.6203	13.8558
	0.126716	-0.103854	Q16566	Q16566	KCC4_HUMAN	CAMK4	Calcium/calmodulin-dependent protein kinase type IV	Color2 [A=255, R=169, G=169, B=169]	1	4		12.6894	12.3378	12.3235	11.7964	12.6506	12.5921
	0.475329	-0.0729125	Q8N5S9;Q8N5S9-2	Q8N5S9;Q8N5S9-2	KKCC1_HUMAN	CAMKK1	Calcium/calmodulin-dependent protein kinase kinase 1	Color2 [A=255, R=169, G=169, B=169]	1	4		13.0522	12.9068	13.0497	13.0109	12.9275	12.8515
	0.580673	0.0692314	Q96RR4;Q96RR4-2;Q96RR4-3;Q96RR4-7	Q96RR4;Q96RR4-2;Q96RR4-3;Q96RR4-4;Q96RR4-5;Q96RR4-6;Q96RR4-7	KKCC2_HUMAN	CAMKK2	Calcium/calmodulin-dependent protein kinase kinase 2	Color2 [A=255, R=169, G=169, B=169]	1	4		14.218	14.0994	14.206	14.1823	14.3116	14.2371
	0.0230984	-0.0136242	Q7Z624	Q7Z624;Q7Z624-2	CMKMT_HUMAN	CAMKMT	Calmodulin-lysine N-methyltransferase	Color2 [A=255, R=169, G=169, B=169]	1	4		12.1304	12.433	11.7703	12.1338	12.1536	12.0056
	1.71669	0.446298	Q5T5Y3;Q5T5Y3-3	Q5T5Y3;Q5T5Y3-3;Q5T5Y3-2	CAMP1_HUMAN	CAMSAP1	Calmodulin-regulated spectrin-associated protein 1	Color2 [A=255, R=169, G=169, B=169]	1	4		12.5528	12.7668	12.4125	12.9462	12.9904	13.1343
	0.440797	-0.209684	Q08AD1;Q08AD1-2;Q08AD1-3	Q08AD1;Q08AD1-2;Q08AD1-3	CAMP2_HUMAN	CAMSAP2	Calmodulin-regulated spectrin-associated protein 2	Color2 [A=255, R=169, G=169, B=169]	1	4		12.1511	11.7522	12.0719	11.4794	11.8249	12.0418
	0.436798	0.149515	Q9P1Y5	Q9P1Y5;Q9P1Y5-2	CAMP3_HUMAN	CAMSAP3	Calmodulin-regulated spectrin-associated protein 3	Color2 [A=255, R=169, G=169, B=169]	1	4		11.9657	12.391	12.3537	12.2764	12.4347	12.4479
	0.595685	-0.105958	Q86VP6	Q86VP6	CAND1_HUMAN	CAND1	Cullin-associated NEDD8-dissociated protein 1	Color2 [A=255, R=169, G=169, B=169]	1	4		18.1471	18.3288	18.3774	18.2483	18.1193	18.1679
	0.190087	-0.0307782	O75155	O75155;O75155-2	CAND2_HUMAN	CAND2	Cullin-associated NEDD8-dissociated protein 2	Color2 [A=255, R=169, G=169, B=169]	1	4		15.3354	15.4076	15.3651	15.2382	15.4402	15.3373
	0.674124	-0.122553	P27824;P27824-2	P27824;P27824-2	CALX_HUMAN	CANX	Calnexin	Color2 [A=255, R=169, G=169, B=169]	1	4		15.4156	15.2297	15.2271	15.1044	15.1246	15.2756
	0.239316	-0.0432072	Q01518	Q01518;Q01518-2	CAP1_HUMAN	CAP1	Adenylyl cyclase-associated protein 1	Color2 [A=255, R=169, G=169, B=169]	1	4		13.7479	13.6781	13.9045	13.7099	13.7094	13.7817
	0.405006	-0.672396	P40123;P40123-2	P40123;P40123-2	CAP2_HUMAN	CAP2	Adenylyl cyclase-associated protein 2	Color2 [A=255, R=169, G=169, B=169]	1	4		9.69425	10.946	9.62263	8.49055	9.33785	10.4173
	0.436806	0.0607265	P07384	P07384	CAN1_HUMAN	CAPN1	Calpain-1 catalytic subunit	Color2 [A=255, R=169, G=169, B=169]	1	4		13.259	13.3019	13.1642	13.2945	13.2313	13.3815
	0.0158358	0.0207653	O75808	O75808	CAN15_HUMAN	CAPN15	Calpain-15	Color2 [A=255, R=169, G=169, B=169]	1	4		9.33743	10.0808	10.2585	9.25366	10.1963	10.2891
	0.430125	-0.129371	P17655	P17655;P17655-2	CAN2_HUMAN	CAPN2	Calpain-2 catalytic subunit	Color2 [A=255, R=169, G=169, B=169]	1	4		12.4937	12.4332	12.7057	12.2776	12.606	12.3609
	0.542088	-0.366394	Q9Y6W3	Q9Y6W3	CAN7_HUMAN	CAPN7	Calpain-7	Color2 [A=255, R=169, G=169, B=169]	1	4		12.5767	11.9244	11.6973	11.9535	11.6764	11.4694
	0.599383	-1.03447	P04632	P04632	CPNS1_HUMAN	CAPNS1	Calpain small subunit 1	Color2 [A=255, R=169, G=169, B=169]	1	4		11.1814	11.9451	9.79386	9.32574	9.68112	10.8101
	0.00821636	-0.00200876	Q14444;Q14444-2	Q14444;Q14444-2	CAPR1_HUMAN	CAPRIN1	Caprin-1	Color2 [A=255, R=169, G=169, B=169]	1	4		13.9268	13.7858	13.6809	13.8697	13.7505	13.7674
	0.103573	-0.0334489	P52907	P52907	CAZA1_HUMAN	CAPZA1	F-actin-capping protein subunit alpha-1	Color2 [A=255, R=169, G=169, B=169]	1	4		15.3689	15.6183	15.2399	15.3878	15.3111	15.4278
	0.311024	-0.214243	P47755	P47755	CAZA2_HUMAN	CAPZA2	F-actin-capping protein subunit alpha-2	Color2 [A=255, R=169, G=169, B=169]	1	4		12.6023	13.296	13.1514	13.0699	12.8913	12.4457
	0.640919	-0.242091	P47756	P47756;P47756-1	CAPZB_HUMAN	CAPZB	F-actin-capping protein subunit beta	Color2 [A=255, R=169, G=169, B=169]	1	4		15.6086	15.9749	15.6667	15.6452	15.6246	15.2541
	0.0647767	-0.155153	Q9Y2V2	Q9Y2V2	CHSP1_HUMAN	CARHSP1	Calcium-regulated heat-stable protein 1	Color2 [A=255, R=169, G=169, B=169]	1	4		10.7442	9.91746	11.8814	11.6254	9.54743	10.9049
	0.255877	-0.0760489	Q86X55;Q86X55-1	Q86X55;Q86X55-1;Q86X55-2	CARM1_HUMAN	CARM1	Histone-arginine methyltransferase CARM1	Color2 [A=255, R=169, G=169, B=169]	1	4		13.9717	14.3226	14.0743	13.9845	14.1579	13.998
	0.728327	-0.0457729	Q5VZK9;Q5VZK9-2	Q5VZK9;Q5VZK9-2	CARL1_HUMAN	CARMIL1	F-actin-uncapping protein LRRC16A	Color2 [A=255, R=169, G=169, B=169]	1	4		14.1347	14.0802	14.1647	14.0784	14.1073	14.0566
	0.350728	0.148537	Q6F5E8;Q6F5E8-2	Q6F5E8;Q6F5E8-2	CARL2_HUMAN	CARMIL2	Capping protein, Arp2/3 and myosin-I linker protein 2	Color2 [A=255, R=169, G=169, B=169]	1	4		12.2131	12.7415	12.6839	12.6347	12.8027	12.6468
	0.254455	-0.182973	P49589-3	P49589;P49589-2;P49589-3	SYCC_HUMAN	CARS1	Isoform 3 of Cysteine--tRNA ligase, cytoplasmic	Color2 [A=255, R=169, G=169, B=169]	1	4		13.7353	14.4366	13.7767	14.0262	13.4599	13.9136
	0.309185	0.404906	Q9HA77	Q9HA77	SYCM_HUMAN	CARS2	Probable cysteine--tRNA ligase, mitochondrial	Color2 [A=255, R=169, G=169, B=169]	1	4		9.38955	10.1883	9.6711	9.47273	11.0815	9.90947
	0.263748	0.184677	O14936;O14936-3	O14936;O14936-4;O14936-2;O14936-3;O14936-5;O14936-6	CSKP_HUMAN	CASK	Peripheral plasma membrane protein CASK	Color2 [A=255, R=169, G=169, B=169]	1	4		13.6384	13.3406	13.6867	13.7494	13.289	14.1813
	0.154025	0.0720587	Q8WXE0;Q8WXE0-2	Q8WXE0;Q8WXE0-2	CSKI2_HUMAN	CASKIN2	Caskin-2	Color2 [A=255, R=169, G=169, B=169]	1	4		13.3171	13.1648	12.8856	12.9529	13.3223	13.3085
	0.186535	0.542338	P31944	P31944	CASPE_HUMAN	CASP14	Caspase-14	Color2 [A=255, R=169, G=169, B=169]	1	4		9.95222	10.3362	12.1773	12.9728	9.97369	11.1463
	0.179735	-0.104498	P42575	P42575;P42575-2;P42575-3	CASP2_HUMAN	CASP2	Caspase-2	Color2 [A=255, R=169, G=169, B=169]	1	4		11.5127	11.3624	11.4234	11.3862	11.6714	10.9273
	0.379044	-0.12351	P42574	P42574	CASP3_HUMAN	CASP3	Caspase-3	Color2 [A=255, R=169, G=169, B=169]	1	4		14.3618	14.4129	14.3525	14.5115	14.054	14.1911
	0.776077	0.248151	P55212	P55212;P55212-2	CASP6_HUMAN	CASP6	Caspase-6	Color2 [A=255, R=169, G=169, B=169]	1	4		13.6885	14.1953	13.9433	14.2194	14.1939	14.1584
	0.378832	0.17113	P55210;P55210-3;P55210-4	P55210;P55210-3;P55210-4	CASP7_HUMAN	CASP7	Caspase-7	Color2 [A=255, R=169, G=169, B=169]	1	4		13.2084	13.0412	13.221	13.0423	13.2793	13.6623
	0.354932	-0.109381	Q14790;Q14790-2;Q14790-4;Q14790-9	Q14790;Q14790-7;Q14790-9;Q14790-2;Q14790-3;Q14790-4;Q14790-5;Q14790-6;Q14790-8	CASP8_HUMAN	CASP8	Caspase-8	Color2 [A=255, R=169, G=169, B=169]	1	4		13.2839	13.3667	13.4265	13.4033	13.0101	13.3355
	0.0474784	-0.0601753	P55211	P55211;P55211-2;P55211-4	CASP9_HUMAN	CASP9	Caspase-9	Color2 [A=255, R=169, G=169, B=169]	1	4		11.4665	12.8565	12.3371	12.2823	11.8523	12.3449
	0.59021	-0.235559	A6NHX0	A6NHX0	CAST2_HUMAN	CASTOR2	Cytosolic arginine sensor for mTORC1 subunit 2	Color2 [A=255, R=169, G=169, B=169]	1	4		11.7899	11.9955	12.2395	11.7199	12.0056	11.5927
	0.268908	-0.124145	P04040	P04040	CATA_HUMAN	CAT	Catalase	Color2 [A=255, R=169, G=169, B=169]	1	4		13.6406	13.7617	13.442	13.755	13.2039	13.513
	0.178739	0.0599057	P16152	P16152	CBR1_HUMAN	CBR1	Carbonyl reductase [NADPH] 1	Color2 [A=255, R=169, G=169, B=169]	1	4		11.9714	12.2399	12.2044	12.2077	12.0285	12.3592
	1.95242	-0.167405	Q8N4T8	Q8N4T8	CBR4_HUMAN	CBR4	3-oxoacyl-[acyl-carrier-protein] reductase	Color2 [A=255, R=169, G=169, B=169]	1	4		13.4179	13.5429	13.5	13.3321	13.3046	13.3219
	1.76788	0.260909	P35520	P35520;P35520-2	CBS_HUMAN	CBS	Cystathionine beta-synthase	Color2 [A=255, R=169, G=169, B=169]	1	4		14.1367	14.1932	14.1579	14.3129	14.422	14.5355
	0.0136492	0.0146313	Q13185	Q13185	CBX3_HUMAN	CBX3	Chromobox protein homolog 3	Color2 [A=255, R=169, G=169, B=169]	1	4		10.7501	11.6287	11.5014	10.9053	11.6827	11.3362
	1.09524	-1.0077	P45973	P45973	CBX5_HUMAN	CBX5	Chromobox protein homolog 5	Color2 [A=255, R=169, G=169, B=169]	1	4		12.1096	13.0202	12.153	11.1703	12.0455	11.0439
	0.113332	-0.017073	Q6P1N0	Q6P1N0	C2D1A_HUMAN	CC2D1A	Coiled-coil and C2 domain-containing protein 1A	Color2 [A=255, R=169, G=169, B=169]	1	4		13.1539	13.1998	13.22	13.2052	13.0744	13.2428
	0.343589	0.241227	Q5T0F9;Q5T0F9-2;Q5T0F9-3	Q5T0F9;Q5T0F9-2;Q5T0F9-3	C2D1B_HUMAN	CC2D1B	Coiled-coil and C2 domain-containing protein 1B	Color2 [A=255, R=169, G=169, B=169]	1	4		10.8859	11.0257	11.0975	11.5524	11.5034	10.677
	0.723476	0.103944	Q8IX12;Q8IX12-2	Q8IX12;Q8IX12-2	CCAR1_HUMAN	CCAR1	Cell division cycle and apoptosis regulator protein 1	Color2 [A=255, R=169, G=169, B=169]	1	4		13.4445	13.3624	13.4885	13.5498	13.4354	13.6222
	0.930557	0.117138	Q8N163	Q8N163;Q8N163-2	CCAR2_HUMAN	CCAR2	Cell cycle and apoptosis regulator protein 2	Color2 [A=255, R=169, G=169, B=169]	1	4		16.7242	16.658	16.7729	16.8172	16.7621	16.9272
	0.0160893	0.0132716	Q9H6E4	Q9H6E4	CC134_HUMAN	CCDC134	Coiled-coil domain-containing protein 134	Color2 [A=255, R=169, G=169, B=169]	1	4		13.1162	12.4071	12.6847	13.1059	12.5331	12.6088
	1.32929	0.573261	Q49A88;Q49A88-2;Q49A88-3;Q49A88-6	Q49A88;Q49A88-3;Q49A88-2;Q49A88-4;Q49A88-6	CCD14_HUMAN	CCDC14	Coiled-coil domain-containing protein 14	Color2 [A=255, R=169, G=169, B=169]	1	4		10.8272	10.77	10.3986	11.5097	11.2165	10.9894
	0.085263	-0.30401	Q5T9S5	Q5T9S5;Q5T9S5-2	CCD18_HUMAN	CCDC18	Coiled-coil domain-containing protein 18	Color2 [A=255, R=169, G=169, B=169]	1	4		8.44151	10.5352	8.57217	6.94577	10.629	9.06205
	0.551788	0.231336	Q7Z3E2	Q7Z3E2	CC186_HUMAN	CCDC186	Coiled-coil domain-containing protein 186	Color2 [A=255, R=169, G=169, B=169]	1	4		13.0641	12.4587	12.7699	12.9156	12.9522	13.1189
	0.287114	0.0945962	O60826	O60826	CCD22_HUMAN	CCDC22	Coiled-coil domain-containing protein 22	Color2 [A=255, R=169, G=169, B=169]	1	4		14.2788	13.8843	14.1861	14.1151	14.3193	14.1985
	0.678029	0.292146	Q9P031	Q9P031	TAP26_HUMAN	CCDC59	Thyroid transcription factor 1-associated protein 26	Color2 [A=255, R=169, G=169, B=169]	1	4		11.9724	12.4494	11.8622	12.2846	12.5365	12.3393
	0.639822	0.164563	Q16204	Q16204	CCDC6_HUMAN	CCDC6	Coiled-coil domain-containing protein 6	Color2 [A=255, R=169, G=169, B=169]	1	4		13.6097	13.2941	13.662	13.6722	13.6683	13.7189
	0.09476	-0.135121	Q3V6T2-3;Q3V6T2-4;Q3V6T2-5	Q3V6T2-3;Q3V6T2-4;Q3V6T2-5	GRDN_HUMAN	CCDC88A	Isoform 3 of Girdin	Color2 [A=255, R=169, G=169, B=169]	1	4		10.814	10.7859	10.3044	10.6341	9.60579	11.259
	0.0110427	0.00160567	Q3V6T2;Q3V6T2-2	Q3V6T2;Q3V6T2-2;Q3V6T2-3;Q3V6T2-4;Q3V6T2-5	GRDN_HUMAN	CCDC88A	Girdin	Color2 [A=255, R=169, G=169, B=169]	1	4		13.525	13.5116	13.6605	13.5553	13.571	13.5756
	0.204866	-0.106938	Q9P219	Q9P219	DAPLE_HUMAN	CCDC88C	Protein Daple	Color2 [A=255, R=169, G=169, B=169]	1	4		12.569	12.1132	12.5748	12.494	12.0568	12.3854
	0.161123	0.482744	Q9Y3X0	Q9Y3X0	CCDC9_HUMAN	CCDC9	Coiled-coil domain-containing protein 9	Color2 [A=255, R=169, G=169, B=169]	1	4		10.159	8.73013	12.1991	10.2997	11.8508	10.3861
	0.0630183	-0.0202475	Q567U6	Q567U6	CCD93_HUMAN	CCDC93	Coiled-coil domain-containing protein 93	Color2 [A=255, R=169, G=169, B=169]	1	4		13.5622	13.867	13.6807	13.6007	13.8176	13.6309
	0.194579	0.179292	Q96F63	Q96F63	CCD97_HUMAN	CCDC97	Coiled-coil domain-containing protein 97	Color2 [A=255, R=169, G=169, B=169]	1	4		10.0965	10.6795	10.0585	10.0304	10.3285	11.0135
	0.395051	0.353064	Q8TD31;Q8TD31-2;Q8TD31-3	Q8TD31;Q8TD31-3;Q8TD31-2	CCHCR_HUMAN	CCHCR1	Coiled-coil alpha-helical rod protein 1	Color2 [A=255, R=169, G=169, B=169]	1	4		10.3675	9.71363	10.3322	10.052	11.095	10.3255
	0.159117	0.117128	Q9BSQ5;Q9BSQ5-2;Q9BSQ5-4	Q9BSQ5;Q9BSQ5-2;Q9BSQ5-4	CCM2_HUMAN	CCM2	Cerebral cavernous malformations 2 protein	Color2 [A=255, R=169, G=169, B=169]	1	4		9.89138	10.2133	9.33557	10.1283	9.8788	9.7846
	0.421528	0.314413	P20248	P20248	CCNA2_HUMAN	CCNA2	Cyclin-A2	Color2 [A=255, R=169, G=169, B=169]	1	4		10.7205	10.2725	9.71564	10.4814	10.8008	10.3697
	0.00476394	-0.00338268	P14635;P14635-2	P14635;P14635-2	CCNB1_HUMAN	CCNB1	G2/mitotic-specific cyclin-B1	Color2 [A=255, R=169, G=169, B=169]	1	4		15.6072	15.1552	15.8592	15.41	15.4496	15.7519
	0.203382	0.0727199	O95067	O95067	CCNB2_HUMAN	CCNB2	G2/mitotic-specific cyclin-B2	Color2 [A=255, R=169, G=169, B=169]	1	4		13.5562	13.8257	13.5821	13.8875	13.773	13.5217
	0.251744	-0.220691	P24385	P24385	CCND1_HUMAN	CCND1	G1/S-specific cyclin-D1	Color2 [A=255, R=169, G=169, B=169]	1	4		11.9112	12.8809	12.0611	12.2082	12.2644	11.7185
	0.0119249	0.00444412	P30279	P30279;P30279-2	CCND2_HUMAN	CCND2	G1/S-specific cyclin-D2	Color2 [A=255, R=169, G=169, B=169]	1	4		15.281	15.4587	15.37	15.2527	15.5977	15.2726
	0.500666	-0.184537	P30281	P30281;P30281-2	CCND3_HUMAN	CCND3	G1/S-specific cyclin-D3	Color2 [A=255, R=169, G=169, B=169]	1	4		12.5145	12.7587	12.8567	12.6259	12.6732	12.2773
	1.2236	0.185896	O95273;O95273-2	O95273;O95273-2	CCDB1_HUMAN	CCNDBP1	Cyclin-D1-binding protein 1	Color2 [A=255, R=169, G=169, B=169]	1	4		12.7613	12.6437	12.5801	12.9337	12.8402	12.7689
	0.553432	-0.13935	P51946	P51946	CCNH_HUMAN	CCNH	Cyclin-H	Color2 [A=255, R=169, G=169, B=169]	1	4		13.8416	13.8352	14.1727	13.8023	13.8181	13.811
	0.590432	-0.222164	O75909;O75909-4	O75909;O75909-2;O75909-1;O75909-4	CCNK_HUMAN	CCNK	Cyclin-K	Color2 [A=255, R=169, G=169, B=169]	1	4		14.412	14.4867	14.2794	14.3576	13.8591	14.2949
	0.114122	0.0500606	Q96S94;Q96S94-2;Q96S94-4;Q96S94-5	Q96S94;Q96S94-5;Q96S94-2;Q96S94-4	CCNL2_HUMAN	CCNL2	Cyclin-L2	Color2 [A=255, R=169, G=169, B=169]	1	4		10.1536	10.4772	10.4373	10.1813	10.6022	10.4348
	0.450401	-0.213105	O60563	O60563	CCNT1_HUMAN	CCNT1	Cyclin-T1	Color2 [A=255, R=169, G=169, B=169]	1	4		12.2349	12.6254	12.5268	12.4358	11.917	12.3951
	0.0968041	0.242324	O60583;O60583-2	O60583;O60583-2	CCNT2_HUMAN	CCNT2	Cyclin-T2	Color2 [A=255, R=169, G=169, B=169]	1	4		10.0433	10.0838	7.55051	9.30865	10.0807	9.01523
	0.622333	0.316952	Q8ND76;Q8ND76-2;Q8ND76-3	Q8ND76;Q8ND76-2;Q8ND76-3	CCNY_HUMAN	CCNY	Cyclin-Y	Color2 [A=255, R=169, G=169, B=169]	1	4		9.63409	9.84693	9.3663	10.1433	10.0846	9.57033
	1.08616	0.510877	Q8N7R7;Q8N7R7-3	Q8N7R7;Q8N7R7-3	CCYL1_HUMAN	CCNYL1	Cyclin-Y-like protein 1	Color2 [A=255, R=169, G=169, B=169]	1	4		11.7056	11.1575	10.9724	11.81	11.747	11.8111
	0.403472	-0.12025	O43303;O43303-2	O43303;O43303-2	CP110_HUMAN	CCP110	Centriolar coiled-coil protein of 110 kDa	Color2 [A=255, R=169, G=169, B=169]	1	4		12.7626	13.1021	12.7154	12.8054	12.7173	12.6967
	0.618387	0.774137	O14618	O14618	CCS_HUMAN	CCS	Copper chaperone for superoxide dismutase	Color2 [A=255, R=169, G=169, B=169]	1	4		10.057	9.22451	8.99535	10.7209	10.5976	9.2808
	0.171056	0.0305945	P78371	P78371;P78371-2	TCPB_HUMAN	CCT2	T-complex protein 1 subunit beta	Color2 [A=255, R=169, G=169, B=169]	1	4		18.175	18.0565	18.126	18.1801	18.232	18.0372
	0.479679	0.0328706	P49368	P49368;P49368-2	TCPG_HUMAN	CCT3	T-complex protein 1 subunit gamma	Color2 [A=255, R=169, G=169, B=169]	1	4		17.4012	17.4842	17.4949	17.4895	17.4906	17.4988
	0.766085	-0.193275	P50991	P50991;P50991-2	TCPD_HUMAN	CCT4	T-complex protein 1 subunit delta	Color2 [A=255, R=169, G=169, B=169]	1	4		18.6178	18.7549	18.829	18.538	18.7121	18.3717
	0.234344	0.0525227	P48643	P48643;P48643-2	TCPE_HUMAN	CCT5	T-complex protein 1 subunit epsilon	Color2 [A=255, R=169, G=169, B=169]	1	4		16.5782	16.4348	16.5568	16.5801	16.4423	16.7051
	0.977931	0.124074	P40227	P40227;P40227-2	TCPZ_HUMAN	CCT6A	T-complex protein 1 subunit zeta	Color2 [A=255, R=169, G=169, B=169]	1	4		16.8002	16.735	16.6501	16.8361	16.9295	16.7918
	0.473773	0.137002	Q92526;Q92526-2	Q92526;Q92526-2;Q92526-3	TCPW_HUMAN	CCT6B	T-complex protein 1 subunit zeta-2	Color2 [A=255, R=169, G=169, B=169]	1	4		18.7214	18.3706	18.3986	18.5619	18.7424	18.5974
	0.786648	-0.0889918	Q99832	Q99832;Q99832-2;Q99832-3;Q99832-4	TCPH_HUMAN	CCT7	T-complex protein 1 subunit eta	Color2 [A=255, R=169, G=169, B=169]	1	4		18.2327	18.2234	18.1225	18.1448	18.1399	18.0269
	0.113011	-0.725321	Q99832-2	Q99832-2	TCPH_HUMAN	CCT7	Isoform 2 of T-complex protein 1 subunit eta	Color2 [A=255, R=169, G=169, B=169]	1	4		15.1872	9.65065	11.34	9.96506	9.41179	14.625
	0.42033	-0.0658398	P50990	P50990;P50990-2;P50990-3	TCPQ_HUMAN	CCT8	T-complex protein 1 subunit theta	Color2 [A=255, R=169, G=169, B=169]	1	4		17.851	17.9693	17.9535	17.8801	17.7537	17.9424
	0.4512	0.0307941	P86790;P86791	P86791;P86790	CCZ1B_HUMAN;CCZ1_HUMAN	CCZ1;CCZ1B	Vacuolar fusion protein CCZ1 homolog B	Color2 [A=255, R=169, G=169, B=169]	1	4		14.6447	14.5799	14.6405	14.6143	14.6584	14.685
	0.0392362	-0.0271769	P32970	P32970;P32970-2	CD70_HUMAN	CD70	CD70 antigen	Color2 [A=255, R=169, G=169, B=169]	1	4		14.4238	14.4113	14.3777	14.2668	14.0367	14.8277
	0.144923	0.128747	Q8IWY9;Q8IWY9-1	Q8IWY9;Q8IWY9-1	CDAN1_HUMAN	CDAN1	Codanin-1	Color2 [A=255, R=169, G=169, B=169]	1	4		12.2303	11.5166	12.6037	12.3849	12.2594	12.0926
	0.0444085	-0.010596	O75794	O75794	CD123_HUMAN	CDC123	Cell division cycle protein 123 homolog	Color2 [A=255, R=169, G=169, B=169]	1	4		15.9606	15.9926	16.0487	16.0283	16.1007	15.8412
	0.0220645	0.00816377	Q13042;Q13042-2;Q13042-3	Q13042;Q13042-2;Q13042-3;Q13042-4	CDC16_HUMAN	CDC16	Cell division cycle protein 16 homolog	Color2 [A=255, R=169, G=169, B=169]	1	4		13.8623	14.2121	14.0249	14.1634	13.9176	14.0428
	0.0701881	-0.0216379	Q12834	Q12834	CDC20_HUMAN	CDC20	Cell division cycle protein 20 homolog	Color2 [A=255, R=169, G=169, B=169]	1	4		12.3567	12.5883	12.4357	12.5433	12.273	12.4995
	0.0477547	-0.0173944	Q9UJX2	Q9UJX2;Q9UJX2-2	CDC23_HUMAN	CDC23	Cell division cycle protein 23 homolog	Color2 [A=255, R=169, G=169, B=169]	1	4		11.6819	11.459	11.7458	11.6974	11.7046	11.4325
	0.027427	0.00781218	P30307;P30307-2	P30307;P30307-2;P30307-3;P30307-4	MPIP3_HUMAN	CDC25C	M-phase inducer phosphatase 3	Color2 [A=255, R=169, G=169, B=169]	1	4		13.5602	13.3673	13.3644	13.3023	13.4763	13.5368
	0.542464	-0.102588	P30260;P30260-2	P30260;P30260-2	CDC27_HUMAN	CDC27	Cell division cycle protein 27 homolog	Color2 [A=255, R=169, G=169, B=169]	1	4		13.2525	13.4263	13.2189	13.2569	13.2429	13.0902
	0.997363	-1.3248	P49427	P49427	UB2R1_HUMAN	CDC34	Ubiquitin-conjugating enzyme E2 R1	Color2 [A=255, R=169, G=169, B=169]	1	4		10.889	11.7879	10.809	10.6882	8.84085	9.9824
	0.279306	0.100561	Q16543	Q16543	CDC37_HUMAN	CDC37	Hsp90 co-chaperone Cdc37	Color2 [A=255, R=169, G=169, B=169]	1	4		14.9076	14.6827	14.8019	14.794	14.7447	15.1552
	0.507867	-0.68984	O60508	O60508	PRP17_HUMAN	CDC40	Pre-mRNA-processing factor 17	Color2 [A=255, R=169, G=169, B=169]	1	4		11.1435	10.0506	10.3742	10.7624	9.05545	9.68105
	0.327503	0.093016	P60953	P60953	CDC42_HUMAN	CDC42	Cell division control protein 42 homolog	Color2 [A=255, R=169, G=169, B=169]	1	4		13.9852	14.0031	13.7768	13.9584	14.1937	13.8922
	1.49253	-0.185637	Q5VT25;Q5VT25-2;Q5VT25-3;Q5VT25-5;Q5VT25-6	Q5VT25;Q5VT25-2;Q5VT25-3;Q5VT25-4;Q5VT25-5;Q5VT25-6	MRCKA_HUMAN	CDC42BPA	Serine/threonine-protein kinase MRCK alpha	Color2 [A=255, R=169, G=169, B=169]	1	4		12.1193	12.2454	12.2175	12.0891	11.9943	11.942
	0.661202	0.156686	Q9Y5S2	Q9Y5S2	MRCKB_HUMAN	CDC42BPB	Serine/threonine-protein kinase MRCK beta	Color2 [A=255, R=169, G=169, B=169]	1	4		13.5188	13.3467	13.4954	13.4383	13.6357	13.7569
	0.368645	-0.193786	Q6DT37	Q6DT37	MRCKG_HUMAN	CDC42BPG	Serine/threonine-protein kinase MRCK gamma	Color2 [A=255, R=169, G=169, B=169]	1	4		10.8324	10.8925	10.4925	10.1845	10.6969	10.7547
	0.147418	0.167851	Q00587;Q00587-2	Q00587;Q00587-2	BORG5_HUMAN	CDC42EP1	Cdc42 effector protein 1	Color2 [A=255, R=169, G=169, B=169]	1	4		14.2134	14.6853	14.3802	14.1358	15.3922	14.2546
	1.32825	-0.141633	O75419;O75419-2;O75419-3	O75419;O75419-2;O75419-3	CDC45_HUMAN	CDC45	Cell division control protein 45 homolog	Color2 [A=255, R=169, G=169, B=169]	1	4		14.5944	14.6454	14.6242	14.5662	14.4711	14.4018
	0.359483	0.0808347	Q99459	Q99459	CDC5L_HUMAN	CDC5L	Cell division cycle 5-like protein	Color2 [A=255, R=169, G=169, B=169]	1	4		19.7432	19.5566	19.4229	19.6346	19.6534	19.6773
	0.00209583	0.0010252	Q99741	Q99741	CDC6_HUMAN	CDC6	Cell division control protein 6 homolog	Color2 [A=255, R=169, G=169, B=169]	1	4		12.7757	12.6928	12.6043	12.4513	12.6519	12.9727
	1.76763	-0.34337	O00311	O00311	CDC7_HUMAN	CDC7	Cell division cycle 7-related protein kinase	Color2 [A=255, R=169, G=169, B=169]	1	4		12.1611	12.0906	12.1488	11.7556	11.664	11.9508
	0.00834469	0.00157324	Q6P1J9	Q6P1J9	CDC73_HUMAN	CDC73	Parafibromin	Color2 [A=255, R=169, G=169, B=169]	1	4		13.9543	13.7674	13.8952	13.8926	13.8183	13.9107
	0.491891	0.228281	Q69YH5	Q69YH5	CDCA2_HUMAN	CDCA2	Cell division cycle-associated protein 2	Color2 [A=255, R=169, G=169, B=169]	1	4		10.7572	11.1245	11.2201	11.5481	11.0778	11.1606
	0.636392	-1.30277	Q9H5V8;Q9H5V8-2	Q9H5V8;Q9H5V8-2	CDCP1_HUMAN	CDCP1	CUB domain-containing protein 1	Color2 [A=255, R=169, G=169, B=169]	1	4		12.8263	12.6645	11.8966	10.7265	12.849	9.90353
	0.369272	-0.0719604	P55285;P55285-2	P55285;P55285-2	CADH6_HUMAN	CDH6	Cadherin-6	Color2 [A=255, R=169, G=169, B=169]	1	4		12.9379	12.7435	12.8231	12.8105	12.6459	12.8323
	0.557001	0.199877	O14735;O14735-3	O14735;O14735-3	CDIPT_HUMAN	CDIPT	CDP-diacylglycerol--inositol 3-phosphatidyltransferase	Color2 [A=255, R=169, G=169, B=169]	1	4		11.6052	11.8601	11.7247	12.1524	11.6686	11.9687
	0.62083	-0.10231	P06493	P06493;P06493-2	CDK1_HUMAN	CDK1	Cyclin-dependent kinase 1	Color2 [A=255, R=169, G=169, B=169]	1	4		16.6344	16.5313	16.5271	16.354	16.4525	16.5794
[truncated: 4,696 more rows]

## Sheet: ISG15 raw intensities
T: Protein.Group	T: Protein.Ids	T: Protein.Names	T: Genes	T: First.Protein.Description	No probe 1	No probe 2	No probe 3	ISG15 probe 1	ISG15 probe 2	JD170 4.6 uM 1	JD170 4.6 uM 2	JD170 13.9 uM 1	JD170 13.9 uM 2	JD170 41.6 uM 1	JD170 41.6 uM 2	JD170 125 uM 1	JD170 125 uM 2
[truncated: 6,431 more rows]

[truncated: 1 more sheets: ISG15 volcano plot values]
