# Supplementary material
Source: Research Square preprint supplement (doi:10.21203/rs.3.rs-9106698/v1)
Supplement: Supplementary file 6 [file 8bfa1718fc964015a78134f4.xlsx]

## Sheet: HDX Summary Table (Table S1)
Dataset S4
Data Set	USP47 (apo)	USP47 (holo)	USP7 (apo)	USP7 (holo)
HDX reaction details	50 mM HEPES pH 7.5, 150 mM NaCl, 1 mM DTT, pDread = 7.15, 25 °C	50 mM HEPES pH 7.5, 150 mM NaCl, 1 mM DTT, pDread = 7.15, 25 °C	50 mM HEPES pH 7.5, 150 mM NaCl, 1 mM DTT, pDread = 7.15, 25 °C	50 mM HEPES pH 7.5, 150 mM NaCl, 1 mM DTT, pDread = 7.15, 25 °C
HDX time course	0.5, 10, 60 (min)	0.5, 10, 60 (min)	0.5, 10, 60 (min)	0.5, 10, 60 (min)
HDX control samples	N/A	N/A	N/A	N/A
Back-exchange (mean / IQR)	N/A	N/A	N/A	N/A
# of Peptides	491	491	161	161
Sequence coverage	0.882	0.882	0.983	0.983
Average peptide length / Redundancy	11.8 / 4.2	11.8 / 4.2	10.1 / 4.71	10.1 / 4.71
Replicates (biological or technical)	3 (technical)	3 (technical)	3 (technical)	3 (technical)
Repeatability	0.035913 (average standard deviation)	0.038486 (average standard deviation)	0.0047722 (average standard deviation)	0.048963 (average standard deviation)
Significant differences in HDX (delta HDX > X D)	0.5 D (99% CI)		0.3 D (99% CI)
Dataset S4. HDX summary table. The table include key results for the HDX-MS experiment in both the apo- and holo- state of USP47 and USP7, including the number of peptides identified, sequence coverage, peptide redundancy, and experimental reproducibility (PMID: 31249422).
