# Supplementary material
Source: Research Square preprint supplement (doi:10.21203/rs.3.rs-9106698/v1)
Supplement: Supplementary file 7 [file 8e58bee802cd7f25e020a5d0.xlsx]

## Sheet: AGILENT BRAVO ABPP PG
Protein.Group	Protein.Ids	Protein.Names	Genes	First.Protein.Description	HA-Ub-PA 1	HA-Ub-PA 2	HA-UB-PA 3	No HA-Ub-PA
A0A0A0MS14	A0A0A0MS14	HV145_HUMAN	IGHV1-45	Immunoglobulin heavy variable 1-45	420499	332861	493302	575643
A0A0B4J1V0	A0A0B4J1V0	HV315_HUMAN	IGHV3-15	Immunoglobulin heavy variable 3-15	91775.3	103656	117976	132279
A0A0B4J1V1;A0A0B4J1X5;A0A0C4DH32;P01762;P01763;P01780;P01782	P01780;P01762;P01763;P01782;A0A0B4J1V1;A0A0B4J1X5;A0A0C4DH32	HV307_HUMAN;HV309_HUMAN;HV311_HUMAN;HV320_HUMAN;HV321_HUMAN;HV348_HUMAN;HV374_HUMAN	IGHV3-11;IGHV3-20;IGHV3-21;IGHV3-48;IGHV3-7;IGHV3-74;IGHV3-9	Immunoglobulin heavy variable 3-21	94819.8	108571	143690	192466
A0A8I5KQE6;P08865	P08865;A0A8I5KQE6	RPSA2_HUMAN;RSSA_HUMAN	RPSA;RPSA2	Small ribosomal subunit protein uS2B	1030.41	1040.37	647.558	1219.65
A6NCI4;A6NCI4-2	A6NCI4;A6NCI4-2	VWA3A_HUMAN	VWA3A	von Willebrand factor A domain-containing protein 3A	222186	229819	273432	274951
A6NHR9;A6NHR9-2	A6NHR9;A6NHR9-2	SMHD1_HUMAN	SMCHD1	Structural maintenance of chromosomes flexible hinge domain-containing protein 1	911.233	731.843	1194.1	1151.15
A6NMX2;P06730;P06730-2;P06730-3	P06730;A6NMX2;P06730-2;P06730-3	I4E1B_HUMAN;IF4E_HUMAN	EIF4E;EIF4E1B	Eukaryotic translation initiation factor 4E type 1B	393.727		390.196	774.063
A8MWD9;P62308	P62308;A8MWD9	RUXGL_HUMAN;RUXG_HUMAN	SNRPG;SNRPGP15	Putative small nuclear ribonucleoprotein G-like protein 15	1817.3	1131.82	874.522	1565.59
B2RXH8;B7ZW38;O60812;P07910;P07910-2;P07910-3;P07910-4;P0DMR1	O60812;P07910;B2RXH8;B7ZW38;P07910-2;P07910-3;P07910-4;P0DMR1	HNRC1_HUMAN;HNRC2_HUMAN;HNRC3_HUMAN;HNRC4_HUMAN;HNRPC_HUMAN	HNRNPC;HNRNPCL1;HNRNPCL2;HNRNPCL3;HNRNPCL4	Heterogeneous nuclear ribonucleoprotein C-like 2	710.776	587.16	511.742	813.265
E9PAV3;E9PAV3-2;Q13765	Q13765;E9PAV3;E9PAV3-2	NACAM_HUMAN;NACA_HUMAN	NACA	Nascent polypeptide-associated complex subunit alpha, muscle-specific form	2808.04	3148.72	3003.92	3013.58
E9PRG8	E9PRG8	CK098_HUMAN	C11orf98	Uncharacterized protein C11orf98	524.564	346.113	187.113	1335.51
O00148	O00148;O00148-2;O00148-3	DX39A_HUMAN	DDX39A	ATP-dependent RNA helicase DDX39A	13921.2	17056.7	15433.5	20539.4
O00154;O00154-2;O00154-3;O00154-4;O00154-5;O00154-6;O00154-7	O00154;O00154-4;O00154-2;O00154-3;O00154-5;O00154-6;O00154-7	BACH_HUMAN	ACOT7	Cytosolic acyl coenzyme A thioester hydrolase	2594.92	3369.3	3840.55	2838.29
O00159;O00159-2;O00159-3	O00159;O00159-3;O00159-2	MYO1C_HUMAN	MYO1C	Unconventional myosin-Ic	3111.16	3620.27	3798.71	3263.62
O00170	O00170	AIP_HUMAN	AIP	AH receptor-interacting protein	1719.28	1596.77	905.585	1073.09
O00203;O00203-3	O00203;Q13367;O00203-3;Q13367-3;Q13367-4	AP3B1_HUMAN	AP3B1	AP-3 complex subunit beta-1	2107.05	2179.13	2302.34	1948.11
O00267;O00267-2	O00267;O00267-2	SPT5H_HUMAN	SUPT5H	Transcription elongation factor SPT5	1181.84	1233.99	1028.24	1043.47
O00299	O00299	CLIC1_HUMAN	CLIC1	Chloride intracellular channel protein 1	2278.51	2099.94	1883.25	2042.88
O00443	O00443	P3C2A_HUMAN	PIK3C2A	Phosphatidylinositol 4-phosphate 3-kinase C2 domain-containing subunit alpha	162.566	326.069	306.952
O00487	O00487	PSDE_HUMAN	PSMD14	26S proteasome non-ATPase regulatory subunit 14	1185.61	986.203		1992.36
O00571;O00571-2	O00571;O00571-2	DDX3X_HUMAN	DDX3X	ATP-dependent RNA helicase DDX3X	7723.05	7640.54	4276.21	9474.59
O00757	O00757	F16P2_HUMAN	FBP2	Fructose-1,6-bisphosphatase isozyme 2	4139.84	3832.48	4065.29	4349.51
O00764	O00764;O00764-2	PDXK_HUMAN	PDXK	Pyridoxal kinase	1177.12	1194.78	1023.38	1612.19
O14581	O14581	OR7AH_HUMAN	OR7A17	Olfactory receptor 7A17	10250.3	11289.7	10376.7	7844.26
O14617;O14617-4;O14617-5	O14617;O14617-2;O14617-3;O14617-4;O14617-5	AP3D1_HUMAN	AP3D1	AP-3 complex subunit delta-1	1442.26	1416.64	1701.07	1267.59
O14638	O14638	ENPP3_HUMAN	ENPP3	Ectonucleotide pyrophosphatase/phosphodiesterase family member 3				1139.28
O14646;O14646-2	O14646;O14646-2	CHD1_HUMAN	CHD1	Chromodomain-helicase-DNA-binding protein 1			325.188
O14727;O14727-2;O14727-3;O14727-4;O14727-5	O14727;O14727-2;O14727-3;O14727-4;O14727-5	APAF_HUMAN	APAF1	Apoptotic protease-activating factor 1		294.908		294.913
O14744	O14744;O14744-2;O14744-3;O14744-4;O14744-5	ANM5_HUMAN	PRMT5	Protein arginine N-methyltransferase 5	10014.7	10908.5	11203.5	9587.59
O14787;O14787-2;Q92973;Q92973-2;Q92973-3	O14787;O14787-2;Q92973;Q92973-2;Q92973-3	TNPO1_HUMAN;TNPO2_HUMAN	TNPO1;TNPO2	Transportin-2	1213.92	801.424	1196.88
O14802	O14802	RPC1_HUMAN	POLR3A	DNA-directed RNA polymerase III subunit RPC1	3543.62	2605.79	4143	8396.98
O14818	O14818;O14818-2	PSA7_HUMAN	PSMA7	Proteasome subunit alpha type-7	3522.38	3505.47	2887.84	3508.47
O14828;O14828-2	O14828;O14828-2	SCAM3_HUMAN	SCAMP3	Secretory carrier-associated membrane protein 3	1375.59	2121.89	1153.21	1242.03
O14841	O14841	OPLA_HUMAN	OPLAH	5-oxoprolinase	422.324	501.67	437.998	334.78
O14908;O14908-2;Q8TF64	O14908;O14908-2;Q8TF64	GIPC1_HUMAN;GIPC3_HUMAN	GIPC1;GIPC3	PDZ domain-containing protein GIPC1	951.153	721.785	804.955	1122.4
O14929	O14929;O14929-2	HAT1_HUMAN	HAT1	Histone acetyltransferase type B catalytic subunit	2194.34	2513.66	2404.66	2104.03
O14980	O14980	XPO1_HUMAN	XPO1	Exportin-1	1016.34	1567.67	1395.81	1653.78
O15013;O15013-4;O15013-5;O15013-6;O15013-7;Q9HCE6;Q9HCE6-2;Q9HCE6-3;Q9HCE6-5	O15013;Q9HCE6;O15013-4;O15013-5;O15013-6;O15013-7;Q9HCE6-2;Q9HCE6-3;Q9HCE6-5	ARGAL_HUMAN;ARHGA_HUMAN	ARHGEF10;ARHGEF10L	Rho guanine nucleotide exchange factor 10	78.5929	301.936	257.266
O15067	O15067	PUR4_HUMAN	PFAS	Phosphoribosylformylglycinamidine synthase	3366.81	3478.02	3139.2	3225.62
O15084;O15084-1;O15084-4	O15084;O15084-1;O15084-2;O15084-4	ANR28_HUMAN	ANKRD28	Serine/threonine-protein phosphatase 6 regulatory ankyrin repeat subunit A		323.789	685.715
O15143	O15143	ARC1B_HUMAN	ARPC1B	Actin-related protein 2/3 complex subunit 1B	5609.22	5686.24	6060.86	4972.99
O15144	O15144	ARPC2_HUMAN	ARPC2	Actin-related protein 2/3 complex subunit 2	6429.97	6217.05	6072.15	6141.06
O15145	O15145	ARPC3_HUMAN	ARPC3	Actin-related protein 2/3 complex subunit 3	1680.94	1138.8	1074.14	1792.17
O15160;O15160-2	O15160;O15160-2	RPAC1_HUMAN	POLR1C	DNA-directed RNA polymerases I and III subunit RPAC1	6044.98	4529.18	5147.04	6592.36
O15198;O15198-2;P84022;P84022-2;P84022-3;Q15796;Q15796-2	O15198;P84022;Q15796;O15198-2;P84022-2;P84022-3;Q15796-2	SMAD2_HUMAN;SMAD3_HUMAN;SMAD9_HUMAN	SMAD2;SMAD3;SMAD9	Mothers against decapentaplegic homolog 9	532.844	523.828	267.995
O15247;Q96NY7;Q96NY7-2;Q9NZA1;Q9NZA1-2;Q9NZA1-3;Q9Y696	O15247;Q96NY7;Q9NZA1;Q9Y696;Q9NZA1-2;Q96NY7-2;Q9NZA1-3	CLIC2_HUMAN;CLIC4_HUMAN;CLIC5_HUMAN;CLIC6_HUMAN	CLIC2;CLIC4;CLIC5;CLIC6	Chloride intracellular channel protein 2	610.269	416.992	708.937	410.492
O15260;O15260-2	O15260;O15260-2	SURF4_HUMAN	SURF4	Surfeit locus protein 4	2646.2	3389.32	2503.48	2974.22
O15357	O15357	SHIP2_HUMAN	INPPL1	Phosphatidylinositol 3,4,5-trisphosphate 5-phosphatase 2	916.299	998.346	663.261	1033.71
O15371;O15371-2;O15371-3	O15371;O15371-2;O15371-3	EIF3D_HUMAN	EIF3D	Eukaryotic translation initiation factor 3 subunit D	4312.9	3849.98	3232.29	3946.52
O15372	O15372	EIF3H_HUMAN	EIF3H	Eukaryotic translation initiation factor 3 subunit H	3632.73	3581.19	3915.32	3153.67
O15391;P25490;Q96MM3	O15391;P25490;Q96MM3	TYY1_HUMAN;TYY2_HUMAN;ZFP42_HUMAN	YY1;YY2;ZFP42	Transcription factor YY2	574.363	386.665	540.274	440.051
O15498	O15498;O15498-2	YKT6_HUMAN	YKT6	Synaptobrevin homolog YKT6	1568.11	1599.08	1354.63	1494.99
O43143	O43143;O60231;Q14562	DHX15_HUMAN	DHX15	ATP-dependent RNA helicase DHX15	9677.74	10406.9	11456.8	10434.2
O43149	O43149	ZZEF1_HUMAN	ZZEF1	Zinc finger ZZ-type and EF-hand domain-containing protein 1		332.063	377.082
O43172;O43172-2	O43172;O43172-2	PRP4_HUMAN	PRPF4	U4/U6 small nuclear ribonucleoprotein Prp4	2866.02	3025.69	2346.26	3024.6
O43175	O43175	SERA_HUMAN	PHGDH	D-3-phosphoglycerate dehydrogenase	747.325	777.786	540.907	983.096
O43237;O43237-2	O43237;O43237-2	DC1L2_HUMAN	DYNC1LI2	Cytoplasmic dynein 1 light intermediate chain 2	5546.38	7294.69	8961.43	11836.7
O43242	O43242;O43242-2	PSMD3_HUMAN	PSMD3	26S proteasome non-ATPase regulatory subunit 3	2456.72	2249.62	2667.48	2348.51
O43252	O43252	PAPS1_HUMAN	PAPSS1	Bifunctional 3'-phosphoadenosine 5'-phosphosulfate synthase 1	3168.97	2926.06	2983.23	3030.38
O43390;O43390-2;O43390-4	O43390;O60506;O60506-4;O43390-2;O43390-4;O60506-2;O60506-3	HNRPR_HUMAN	HNRNPR	Heterogeneous nuclear ribonucleoprotein R	5558.17	4047.54	4029.61	5289.65
O43396	O43396	TXNL1_HUMAN	TXNL1	Thioredoxin-like protein 1	5678.61	5619.51	5333.18	5158.77
O43422;O43422-2	O43422;O43422-2	P52K_HUMAN	THAP12	52 kDa repressor of the inhibitor of the protein kinase	233.997	236.993		257.622
O43426	O43426;O43426-2;O43426-4;O43426-5	SYNJ1_HUMAN	SYNJ1	Synaptojanin-1	5273.98	9533.98	6450.67	38521.2
O43464;O43464-2;O43464-3;O43464-4	O43464;O43464-2;O43464-3;O43464-4	HTRA2_HUMAN	HTRA2	Serine protease HTRA2, mitochondrial		688.697	711.681
O43592	O43592	XPOT_HUMAN	XPOT	Exportin-T	2623.38	2069.86	2236.3	2305.44
O43615	O43615	TIM44_HUMAN	TIMM44	Mitochondrial import inner membrane translocase subunit TIM44	1461.08	1089.41	510.859	1229.14
O43681	O43681	GET3_HUMAN	GET3	ATPase GET3	2308.87	2761.68	2192.58	2936.62
O43684;O43684-2	O43684;O43684-2	BUB3_HUMAN	BUB3	Mitotic checkpoint protein BUB3	3433.31	3763.66	3218.6	3016.37
O43707	O43707;O43707-2	ACTN4_HUMAN	ACTN4	Alpha-actinin-4	571.707	588.784	491.484	549.898
O43747	O43747;O43747-2	AP1G1_HUMAN	AP1G1	AP-1 complex subunit gamma-1	3595.41	2627.36	2630.91	2478.09
O43776	O43776	SYNC_HUMAN	NARS1	Asparagine--tRNA ligase, cytoplasmic	17282.7	15556	16504.3	16546.4
O43847;O43847-2	O43847;O43847-2	NRDC_HUMAN	NRDC	Nardilysin	928.395	994.955	1007.28	1222.25
O43865	O43865	SAHH2_HUMAN	AHCYL1	S-adenosylhomocysteine hydrolase-like protein 1	1743.96	1836.82	2166.25	1629.97
O43924	O43924	PDE6D_HUMAN	PDE6D	Retinal rod rhodopsin-sensitive cGMP 3',5'-cyclic phosphodiesterase subunit delta	665.164	663.121	767.466
O60231	O60231	DHX16_HUMAN	DHX16	Pre-mRNA-splicing factor ATP-dependent RNA helicase DHX16	1184.55	1154.14	1188.9	822.906
O60256;O60256-2;O60256-3;O60256-4	O60256;O60256-2;O60256-3;O60256-4	KPRB_HUMAN	PRPSAP2	Phosphoribosyl pyrophosphate synthase-associated protein 2	2287.37	1965.24	1831.89	1546.48
O60264;P28370;P28370-2	O60264;P28370;P28370-2	SMCA1_HUMAN;SMCA5_HUMAN	SMARCA1;SMARCA5	SWI/SNF-related matrix-associated actin-dependent regulator of chromatin subfamily A member 5	1042.05	934.912	1076.39	909.833
O60341;O60341-2	O60341;O60341-2	KDM1A_HUMAN	KDM1A	Lysine-specific histone demethylase 1A	1468.73	2033.34	1929.93	1772.72
O60506;O60506-2;O60506-3;O60506-4	O60506;O60506-4;O60506-2;O60506-3	HNRPQ_HUMAN	SYNCRIP	Heterogeneous nuclear ribonucleoprotein Q	595.711		415.79	369.914
O60524;O60524-3;O60524-4;O60524-5	O60524;O60524-3;O60524-4;O60524-5	NEMF_HUMAN	NEMF	Ribosome quality control complex subunit NEMF	864.475	1226.04	1057.23	889.147
O60547;O60547-2	O60547;O60547-2	GMDS_HUMAN	GMDS	GDP-mannose 4,6 dehydratase	1356.62	869.854	731.486	1814.24
O60551;P30419;P30419-2	O60551;P30419;P30419-2	NMT1_HUMAN;NMT2_HUMAN	NMT1;NMT2	Glycylpeptide N-tetradecanoyltransferase 2	1157.78	1627.07	976.772	828.212
O60568	O60568	PLOD3_HUMAN	PLOD3	Multifunctional procollagen lysine hydroxylase and glycosyltransferase LH3	347.589	534.099	580.636	660.143
O60678;O60678-2	O60678;O60678-2	ANM3_HUMAN	PRMT3	Protein arginine N-methyltransferase 3	874.715	797.543	984.164	706.858
O60701	O60701;O60701-2;O60701-3	UGDH_HUMAN	UGDH	UDP-glucose 6-dehydrogenase	2535.12	2428.41	2910.16	2461.31
O60814;P06899;P23527;P33778;P57053;P58876;P62807;Q16778;Q5QNW6;Q5QNW6-2;Q8N257;Q93079;Q99877;Q99879;Q99880	O60814;P06899;P23527;P33778;P57053;P58876;P62807;Q16778;Q5QNW6;Q8N257;Q93079;Q99877;Q99879;Q99880;Q5QNW6-2	H2B1B_HUMAN;H2B1C_HUMAN;H2B1D_HUMAN;H2B1H_HUMAN;H2B1J_HUMAN;H2B1K_HUMAN;H2B1L_HUMAN;H2B1M_HUMAN;H2B1N_HUMAN;H2B1O_HUMAN;H2B2E_HUMAN;H2B2F_HUMAN;H2B3B_HUMAN;H2BFS_HUMAN	H2BC11;H2BC12;H2BC12L;H2BC13;H2BC14;H2BC15;H2BC17;H2BC18;H2BC21;H2BC26;H2BC3;H2BC4;H2BC5;H2BC9	Histone H2B type 1-K	336.148	605.32	365.385
O60841	O60841	IF2P_HUMAN	EIF5B	Eukaryotic translation initiation factor 5B	465.621	281.569	444.64	234.816
O60884	O60884	DNJA2_HUMAN	DNAJA2	DnaJ homolog subfamily A member 2	467.009	758.617	1563.67	433.708
O60942;O60942-2	O60942;O60942-2;O60942-3;O60942-4	MCE1_HUMAN	RNGTT	mRNA-capping enzyme	1648.68	1729.45	1362.11	1451.27
O75083	O75083	WDR1_HUMAN	WDR1	WD repeat-containing protein 1	26576.6	27137.3	31420	26213
O75131	O75131	CPNE3_HUMAN	CPNE3	Copine-3	16935.2	16215	15816.5	12454.7
O75153	O75153	CLU_HUMAN	CLUH	Clustered mitochondria protein homolog	3349.72	3594.68	4102.25	3202.17
O75165	O75165	DJC13_HUMAN	DNAJC13	DnaJ homolog subfamily C member 13	1395.66	1419.6	1432.62	2427.68
O75223	O75223;O75223-3	GGCT_HUMAN	GGCT	Gamma-glutamylcyclotransferase	3084.43	2864.28	3533.29	3177.36
O75317	O75317	UBP12_HUMAN	USP12	Ubiquitin carboxyl-terminal hydrolase 12	1818.83		1473.28
O75369;O75369-2;O75369-8;O75369-9	O75369;O75369-2;O75369-3;O75369-6;O75369-4;O75369-5;O75369-7;O75369-8;O75369-9	FLNB_HUMAN	FLNB	Filamin-B	8151.45	7983.83	7011.64	9108.65
O75436	O75436;O75436-2	VP26A_HUMAN	VPS26A	Vacuolar protein sorting-associated protein 26A	4132.51	4604.42	4118.73	3908.18
O75439	O75439	MPPB_HUMAN	PMPCB	Mitochondrial-processing peptidase subunit beta	2541.45	2255.45	3221.97	2065.35
O75467;Q6AW86	O75467;Q6AW86	Z324A_HUMAN;Z324B_HUMAN	ZNF324;ZNF324B	Zinc finger protein 324A	4108.27	3145.97	2903.33
O75530;O75530-2;O75530-3	O75530;O75530-2;O75530-3	EED_HUMAN	EED	Polycomb protein EED	371.271	224.903	727.094	479.506
O75531	O75531	BAF_HUMAN	BANF1	Barrier-to-autointegration factor	1519.92	713.805	1194	3067.51
O75533	O75533	SF3B1_HUMAN	SF3B1	Splicing factor 3B subunit 1		405.442	277.583	1930.81
O75534;O75534-2;O75534-3;O75534-4	O75534;O75534-2;O75534-3;O75534-4	CSDE1_HUMAN	CSDE1	Cold shock domain-containing protein E1	6711.77	7343.32	8603.89	7110.42
O75581	O75581	LRP6_HUMAN	LRP6	Low-density lipoprotein receptor-related protein 6	3637.93	3713.27	4368.02	5254.29
O75592;O75592-2	O75592;O75592-2	MYCB2_HUMAN	MYCBP2	E3 ubiquitin-protein ligase MYCBP2	430.837	146.867
O75643	O75643;O75643-2	U520_HUMAN	SNRNP200	U5 small nuclear ribonucleoprotein 200 kDa helicase	2772.43	2997.38	3537.7	2584.16
O75717	O75717;O75717-2	WDHD1_HUMAN	WDHD1	WD repeat and HMG-box DNA-binding protein 1	1786.9	1320.73	1297.14	1563.65
O75818;O75818-2	O75818;O75818-2	RPP40_HUMAN	RPP40	Ribonuclease P protein subunit p40	807.041	786.046	1056.74	1218.28
O75821	O75821	EIF3G_HUMAN	EIF3G	Eukaryotic translation initiation factor 3 subunit G	5019.98	5040.88	4890.64	3601.27
O75822;O75822-3	O75822;O75822-2;O75822-3	EIF3J_HUMAN	EIF3J	Eukaryotic translation initiation factor 3 subunit J		757.934		14582
O75884;O75884-2	O75884;O75884-2	RBBP9_HUMAN	RBBP9	Serine hydrolase RBBP9	1130.58	1502.2	727.867	1191.53
O75912;Q13574;Q13574-1;Q13574-3;Q13574-4;Q13574-5;Q13574-6;Q13574-7	O75912;Q13574;Q13574-1;Q13574-3;Q13574-4;Q13574-5;Q13574-6;Q13574-7	DGKI_HUMAN;DGKZ_HUMAN	DGKI;DGKZ	Diacylglycerol kinase iota	1198.28	698.794	842.597
O76021	O76021	RL1D1_HUMAN	RSL1D1	Ribosomal L1 domain-containing protein 1	1064.97	907.441	1000.71	1086.16
O76031	O76031	CLPX_HUMAN	CLPX	ATP-dependent Clp protease ATP-binding subunit clpX-like, mitochondrial		321.274
O94776;O94776-2	O94776;Q13330;Q9BTC8;O94776-2;Q13330-2;Q13330-3;Q9BTC8-2	MTA2_HUMAN	MTA2	Metastasis-associated protein MTA2	725.187	138.762	572.53	415.815
O94832	O94832	MYO1D_HUMAN	MYO1D	Unconventional myosin-Id	295.882	273.266	268.863
O94966;O94966-3;O94966-4;O94966-5;O94966-6;O94966-7	O94966;O94966-3;O94966-4;O94966-5;O94966-6;O94966-7	UBP19_HUMAN	USP19	Ubiquitin carboxyl-terminal hydrolase 19	8718.06	8357.53	9542.01	303.475
O94979;O94979-10;O94979-2;O94979-3;O94979-4;O94979-6;O94979-8;O94979-9	O94979;O94979-10;O94979-2;O94979-3;O94979-4;O94979-5;O94979-6;O94979-7;O94979-8;O94979-9	SC31A_HUMAN	SEC31A	Protein transport protein Sec31A	3377.18	3134.97	4185.5	2693.48
O95071;O95071-2	O95071;O95071-2	UBR5_HUMAN	UBR5	E3 ubiquitin-protein ligase UBR5	973.378	1071.96	1272.96	1147.29
O95163	O95163	ELP1_HUMAN	ELP1	Elongator complex protein 1	1389.69	1501.1	1432.81	1131.04
O95202	O95202	LETM1_HUMAN	LETM1	Mitochondrial proton/calcium exchanger protein	703.558		670.917	3891.84
O95340;O95340-2	O95340;O95340-2	PAPS2_HUMAN	PAPSS2	Bifunctional 3'-phosphoadenosine 5'-phosphosulfate synthase 2	1004.49	677.635	727.877	1111.94
O95347;O95347-2	O95347;O95347-2	SMC2_HUMAN	SMC2	Structural maintenance of chromosomes protein 2	1163.37	443.432	272.494	589.367
O95352;O95352-3	O95352;O95352-2;O95352-3	ATG7_HUMAN	ATG7	Ubiquitin-like modifier-activating enzyme ATG7	2084.32	1749.64	1841.29	2450.53
O95361;O95361-2	O95361;O95361-2;Q309B1	TRI16_HUMAN	TRIM16	Tripartite motif-containing protein 16	1309.79	1097.72	1085.47	978.61
O95363	O95363	SYFM_HUMAN	FARS2	Phenylalanine--tRNA ligase, mitochondrial	1021.25	1075.18	704.232	683.335
O95382;O95382-3	O95382;O95382-3	M3K6_HUMAN	MAP3K6	Mitogen-activated protein kinase kinase kinase 6			160.484	1205.34
O95394;O95394-3;O95394-4	O95394;O95394-3;O95394-4	AGM1_HUMAN	PGM3	Phosphoacetylglucosamine mutase	769.768	822.477	620.741	586.054
O95433	O95433;O95433-2	AHSA1_HUMAN	AHSA1	Activator of 90 kDa heat shock protein ATPase homolog 1	9695.77	10249.2	10192.7	7198.33
O95453;O95453-2;O95453-3;O95453-4	O95453;O95453-2;O95453-3;O95453-4	PARN_HUMAN	PARN	Poly(A)-specific ribonuclease PARN	993.815	821.913	1166.77
O95456;O95456-2	O95456;O95456-2	PSMG1_HUMAN	PSMG1	Proteasome assembly chaperone 1			477.364
O95486	O95486	SC24A_HUMAN	SEC24A	Protein transport protein Sec24A	199.505	179.082	511.348	528.807
O95487;O95487-2;O95487-3	O95487;O95487-2;O95487-3	SC24B_HUMAN	SEC24B	Protein transport protein Sec24B	294.594	176.408		114.124
O95685	O95685	PPR3D_HUMAN	PPP1R3D	Protein phosphatase 1 regulatory subunit 3D	1020.19	951.167	865.119	1955.41
O95714	O95714;Q9BVR0	HERC2_HUMAN	HERC2	E3 ubiquitin-protein ligase HERC2	4246.75	4820.73	4504.9	8389.91
O95747	O95747	OXSR1_HUMAN	OXSR1	Serine/threonine-protein kinase OSR1	604.259	584.205	206.967	362.14
O95757	O95757	HS74L_HUMAN	HSPA4L	Heat shock 70 kDa protein 4L	1289.3	1097.6	1172.14	865.206
O95782;O95782-2	O94973;O95782;O94973-2;O94973-3;O95782-2	AP2A1_HUMAN	AP2A1	AP-2 complex subunit alpha-1	2715.74	2357.31	2445.5	5234.31
O95831;O95831-3	O95831;O95831-3;O95831-5;O95831-2	AIFM1_HUMAN	AIFM1	Apoptosis-inducing factor 1, mitochondrial	3241.92	4885.61	3868.58	6359.63
O95861;O95861-2;O95861-3;O95861-4	O95861;O95861-2;O95861-3;O95861-4	BPNT1_HUMAN	BPNT1	3'(2'),5'-bisphosphate nucleotidase 1	865.229	938.755	714.817	408.109
O96013;O96013-2;O96013-3;O96013-4;Q9NQU5;Q9NQU5-2;Q9P286	O96013;Q9NQU5;Q9P286;O96013-2;O96013-3;O96013-4;Q9NQU5-2	PAK4_HUMAN;PAK5_HUMAN;PAK6_HUMAN	PAK4;PAK5;PAK6	Serine/threonine-protein kinase PAK 4	919.373	574.513	653.551	773.383
O96017;O96017-13;O96017-4;O96017-9	O96017;O96017-13;O96017-4;O96017-9	CHK2_HUMAN	CHEK2	Serine/threonine-protein kinase Chk2		118.938	501.821	420.028
P00338;P00338-3	P00338;P00338-3;P00338-4	LDHA_HUMAN	LDHA	L-lactate dehydrogenase A chain	251711	215779	231297	256798
P00367	P00367;P49448;P00367-3	DHE3_HUMAN	GLUD1	Glutamate dehydrogenase 1, mitochondrial	1972.9	1919.92	1969.35	1704.27
P00374	P00374;P00374-2	DYR_HUMAN	DHFR	Dihydrofolate reductase	1539.95	896.189	1183.05	1219.66
P00390;P00390-2;P00390-3	P00390;P00390-2;P00390-3;P00390-4;P00390-5	GSHR_HUMAN	GSR	Glutathione reductase, mitochondrial	2039.07	1871.9	2150.92	2391.5
P00491	P00491	PNPH_HUMAN	PNP	Purine nucleoside phosphorylase	6496.86	5891.3	6756.09	7199.18
P00492	P00492	HPRT_HUMAN	HPRT1	Hypoxanthine-guanine phosphoribosyltransferase	729.802	844.21	331.515	590.256
P00558;P00558-2	P00558;P00558-2	PGK1_HUMAN	PGK1	Phosphoglycerate kinase 1	4047.33	4326.82	3830.63	4770.58
P00966	P00966	ASSY_HUMAN	ASS1	Argininosuccinate synthase	16495	16535.9	17300.9	15272.5
P01023	P01023	A2MG_HUMAN	A2M	Alpha-2-macroglobulin	1388.59	1886.31	1956.25	2841.35
P01111	P01111;P01116;P01116-2	RASN_HUMAN	NRAS	GTPase NRas	4133.6	4124.13	4591.93	5868.1
P01566;P01570;P01571;P05014	P01566;P01570;P01571;P05014	IFN10_HUMAN;IFN14_HUMAN;IFN17_HUMAN;IFNA4_HUMAN	IFNA10;IFNA14;IFNA17;IFNA4	Interferon alpha-10	1810.11		2110.12
P01857;P01857-1;P01860;P01860-1	P01857;P01859;P01860;P01861;P0DOX5;P01857-1;P01859-1;P01860-1;P01861-1	IGHG1_HUMAN;IGHG3_HUMAN	IGHG1;IGHG3	Immunoglobulin heavy constant gamma 1	11211.1	14725.9	11977.8	4740.38
P01871;P01871-1	P01871;P0DOX6;P01871-1	IGHM_HUMAN	IGHM	Immunoglobulin heavy constant mu	24093.9	34167.5	25447.4	23773.6
P02042;P02100;P68871;P69891;P69892	P02042;P02100;P68871;P69891;P69892	HBB_HUMAN;HBD_HUMAN;HBE_HUMAN;HBG1_HUMAN;HBG2_HUMAN	HBB;HBD;HBE1;HBG1;HBG2	Hemoglobin subunit delta	1442.49	1430.96	1408.87	1866.44
P02768;P02768-2;P02768-3	P02768;P02768-3;P02768-2	ALBU_HUMAN	ALB	Albumin	1557.55	905.058	990.7	1614.83
P02786	P02786	TFR1_HUMAN	TFRC	Transferrin receptor protein 1	2931.05	2961.71	3491.72	2752.85
P04075	P04075;P04075-2	ALDOA_HUMAN	ALDOA	Fructose-bisphosphate aldolase A	19298.1	17591.9	16570.3	18088.8
P04183	P04183	KITH_HUMAN	TK1	Thymidine kinase, cytosolic	1159.74	942.717	1064.94	909.521
P04264	P04264	K2C1_HUMAN	KRT1	Keratin, type II cytoskeletal 1	782.129	861.853	2673.75	5570.61
P04406	P04406;P04406-2	G3P_HUMAN	GAPDH	Glyceraldehyde-3-phosphate dehydrogenase	193655	231057	259046	178417
P04792	P04792	HSPB1_HUMAN	HSPB1	Heat shock protein beta-1	40327.2	33485	26616.5	50838.1
P04818;P04818-2	P04818;P04818-2	TYSY_HUMAN	TYMS	Thymidylate synthase		430.331	370.707
P05141;P12236	P05141;P12235;P12236;Q9H0C2	ADT2_HUMAN;ADT3_HUMAN	SLC25A5;SLC25A6	ADP/ATP translocase 2	2127.11	2016.07	2227.53	1820.58
P05198	P05198	IF2A_HUMAN	EIF2S1	Eukaryotic translation initiation factor 2 subunit 1	4292.11	4403.12	4426.93	4010.19
P05388;Q8NHW5	P05388;Q8NHW5;P05388-2	RLA0L_HUMAN;RLA0_HUMAN	RPLP0;RPLP0P6	Large ribosomal subunit protein uL10	1112.41	1217.36	644.064	1840.99
P05455	P05455	LA_HUMAN	SSB	Lupus La protein	1035.94	1404.93	783.992	1783.79
P05783	P05783	K1C18_HUMAN	KRT18	Keratin, type I cytoskeletal 18	24444.9	22938	16589.6	21177.5
P05787;P05787-2	P05787;P05787-2	K2C8_HUMAN	KRT8	Keratin, type II cytoskeletal 8	37389.1	37097.1	27234.4	36091.7
P06239;P06239-3;P06241;P06241-2;P06241-3;P07947;P07948;P07948-2;P08631;P08631-2;P08631-3;P08631-4;P09769;P11362;P11362-14;P11362-19;P11362-2;P11362-20;P11362-21;P11362-3;P11362-4;P11362-5;P11362-6;P11362-7;P20794;P20794-2;P20794-3;P21802;P21802-15;P21802-16;P21802-17;P21802-18;P21802-2;P21802-20;P21802-21;P21802-22;P21802-23;P21802-3;P21802-4;P21802-5;P21802-6;P21802-8;P22455;P22455-2;P22607;P226…	P06239;P06241;P06241-3;P07947;P07948;P08631;P08631-2;P09769;P11362;P11362-14;P11362-19;P11362-2;P11362-20;P11362-21;P11362-3;P11362-4;P11362-5;P11362-6;P11362-7;P20794;P21802;P21802-3;P22455;P22607;P51451;Q8IZL9;Q9UPZ9;P21802-15;P21802-16;P21802-17;P21802-18;P21802-2;P21802-20;P21802-21;P21802-22;P21802-23;P21802-4;P21802-5;P21802-6;P21802-8;P06239-3;P06241-2;P07948-2;P08631-3;P08631-4;P20794-2;P…	BLK_HUMAN;CDK20_HUMAN;CILK1_HUMAN;FGFR1_HUMAN;FGFR2_HUMAN;FGFR3_HUMAN;FGFR4_HUMAN;FGR_HUMAN;FYN_HUMAN;HCK_HUMAN;LCK_HUMAN;LYN_HUMAN;MAK_HUMAN;YES_HUMAN	BLK;CDK20;CILK1;FGFR1;FGFR2;FGFR3;FGFR4;FGR;FYN;HCK;LCK;LYN;MAK;YES1	Tyrosine-protein kinase Lck	922.833	710.371	383.365	1081.58
P06312	P06312	KV401_HUMAN	IGKV4-1	Immunoglobulin kappa variable 4-1	2070140	2010110	2098020	3294660
P06733	P06733;P06733-2	ENOA_HUMAN	ENO1	Alpha-enolase	20711.3	15922	12980.8	22271.2
P06744;P06744-2	P06744;P06744-2	G6PI_HUMAN	GPI	Glucose-6-phosphate isomerase	3033.93	3525.16	2299.98	4316.05
P06748;P06748-2;P06748-3	P06748;P06748-2;P06748-3	NPM_HUMAN	NPM1	Nucleophosmin	563.146	573.801	330.669
P07237	P07237	PDIA1_HUMAN	P4HB	Protein disulfide-isomerase	668.034	1027.7	720.99	749.771
P07305;P07305-2	P07305;P07305-2	H10_HUMAN	H1-0	Histone H1.0	1548.08	1398.27	915.031	2534.33
P07339	P07339	CATD_HUMAN	CTSD	Cathepsin D	9925.08	9170	7467.48	8624.26
P07384	P07384	CAN1_HUMAN	CAPN1	Calpain-1 catalytic subunit	3387.41	2878.19	2485.4	3690.23
P07437	P04350;P07437;P68371	TBB5_HUMAN	TUBB	Tubulin beta chain	46588.9	37986.3	28303.7	46460.8
P07477	P07477	TRY1_HUMAN	PRSS1	Serine protease 1	23763.4	25101.7	23391.8	49501.9
P07737	P07737	PROF1_HUMAN	PFN1	Profilin-1	103873	128871	123773	103681
P07741	P07741;P07741-2	APT_HUMAN	APRT	Adenine phosphoribosyltransferase	11098.2	7375.11	6483.79	11043.5
P07814	P07814	SYEP_HUMAN	EPRS1	Bifunctional glutamate/proline--tRNA ligase	2643.59	2921.98	3037.71	2884.56
P07900;P07900-2	P07900;P07900-2	HS90A_HUMAN	HSP90AA1	Heat shock protein HSP 90-alpha	13914.2	12417.4	11513.3	15431.9
P08133;P08133-2	P08133;P08133-2	ANXA6_HUMAN	ANXA6	Annexin A6	833.316	1215.66	300.91	788.593
P08134;P61586	P08134;P61586	RHOA_HUMAN;RHOC_HUMAN	RHOA;RHOC	Rho-related GTP-binding protein RhoC	2862.16	3890.27	3814.1	4122.1
P08195;P08195-2;P08195-3;P08195-4;P08195-5	P08195;P08195-4;P08195-2;P08195-3;P08195-5	4F2_HUMAN	SLC3A2	4F2 cell-surface antigen heavy chain	1069.03	985.118	574.833	1725.04
P08237;P08237-3	P08237;P08237-2;P08237-3	PFKAM_HUMAN	PFKM	ATP-dependent 6-phosphofructokinase, muscle type	9634.93	9589.27	9436.33	8748.08
P08238	P07900;P08238;Q14568;Q58FF8;P07900-2	HS90B_HUMAN	HSP90AB1	Heat shock protein HSP 90-beta	43364	37428.8	34606.6	48838.6
P08243;P08243-2	P08243;P08243-2;P08243-3	ASNS_HUMAN	ASNS	Asparagine synthetase [glutamine-hydrolyzing]	10550.6	10786.3	11319.6	9745.08
P08397;P08397-2;P08397-3;P08397-4	P08397;P08397-2;P08397-3;P08397-4	HEM3_HUMAN	HMBS	Porphobilinogen deaminase	523.066	507.801	512.007	576.119
P08559;P08559-2;P08559-3;P08559-4	P08559;P29803;P08559-2;P08559-3;P08559-4	ODPA_HUMAN	PDHA1	Pyruvate dehydrogenase E1 component subunit alpha, somatic form, mitochondrial	3554.21	3483.48	2718.86	3047.74
P08727	P08727;P13646;P13646-2;P13646-3	K1C19_HUMAN	KRT19	Keratin, type I cytoskeletal 19	10226.7	11948	8326.08	10812.6
P09001	P09001	RM03_HUMAN	MRPL3	Large ribosomal subunit protein uL3m	1119.14	1469.35	1282.34	862.98
P09467	O00757;P09467	F16P1_HUMAN	FBP1	Fructose-1,6-bisphosphatase 1	6875.08	7063.23	6451.15	8089.86
P09622	P09622;P09622-2	DLDH_HUMAN	DLD	Dihydrolipoyl dehydrogenase, mitochondrial	14000.3	14892.5	14729.2	11801.1
P09651;P09651-2;P09651-3	P09651;Q32P51;P09651-2;P09651-3	ROA1_HUMAN	HNRNPA1	Heterogeneous nuclear ribonucleoprotein A1	4193.01	5617.66	5744.17	4816.05
P09874	P09874	PARP1_HUMAN	PARP1	Poly [ADP-ribose] polymerase 1	1406.11	1120.71	1051.99	1680.57
P09960;P09960-4	P09960;P09960-4	LKHA4_HUMAN	LTA4H	Leukotriene A-4 hydrolase	3563.61	3616.29	3039.28	3645.67
P0DMV8;P0DMV9	P0DMV8;P0DMV9;P34931;P0DMV8-2	HS71A_HUMAN;HS71B_HUMAN	HSPA1A;HSPA1B	Heat shock 70 kDa protein 1A	16399.2	16175.3	14767.3	18961.3
P10114;P61225;Q9Y3L5	P10114;P61225;Q9Y3L5	RAP2A_HUMAN;RAP2B_HUMAN;RAP2C_HUMAN	RAP2A;RAP2B;RAP2C	Ras-related protein Rap-2a	1093.13	1089.13	867.334
P10155;P10155-3;P10155-4;P10155-5	P10155;P10155-3;P10155-4;P10155-5	RO60_HUMAN	RO60	RNA-binding protein RO60	2983.84	2540.31	2084.31	2430.27
P10412;P16402;P16403	P10412;P16402;P16403	H12_HUMAN;H13_HUMAN;H14_HUMAN	H1-2;H1-3;H1-4	Histone H1.4	11901.6	6484.43	5067.35	22547.3
P10515	P10515	ODP2_HUMAN	DLAT	Dihydrolipoyllysine-residue acetyltransferase component of pyruvate dehydrogenase complex, mitochondrial	1767.44	1397.09	1542.62	1852.05
P10586;P10586-2	P10586;P10586-2	PTPRF_HUMAN	PTPRF	Receptor-type tyrosine-protein phosphatase F	952.019	1924.52	1821.9	1748.81
P10768	P10768	ESTD_HUMAN	ESD	S-formylglutathione hydrolase	560.907	332.293	506.83
P10809	P10809	CH60_HUMAN	HSPD1	60 kDa heat shock protein, mitochondrial	3237.07	3219.19	2446.95	2751.88
P11021	P11021	BIP_HUMAN	HSPA5	Endoplasmic reticulum chaperone BiP	3982.42	3675.29	4023.59	4052.98
P11142	P0DMV8;P0DMV9;P11021;P11142;P34931;P54652;P0DMV8-2;P11142-2	HSP7C_HUMAN	HSPA8	Heat shock cognate 71 kDa protein	15537.9	16531.5	17644.8	17771.1
P11166	P11166	GTR1_HUMAN	SLC2A1	Solute carrier family 2, facilitated glucose transporter member 1	966.597	967.285	1465.18	969.745
P11177;P11177-2	P11177;P11177-2;P11177-3	ODPB_HUMAN	PDHB	Pyruvate dehydrogenase E1 component subunit beta, mitochondrial	3210.36	2708.87	2726.48	2222.83
P11216	P11216	PYGB_HUMAN	PYGB	Glycogen phosphorylase, brain form	3542.67	3420.73	3602.95	3487.13
P11274;P11274-2;Q12979;Q12979-2;Q12979-4	P11274;Q12979;P11274-2;Q12979-2;Q12979-4	ABR_HUMAN;BCR_HUMAN	ABR;BCR	Breakpoint cluster region protein	889.638	716.733	491.106	556.303
P11310;P11310-2	P11310;P11310-2	ACADM_HUMAN	ACADM	Medium-chain specific acyl-CoA dehydrogenase, mitochondrial	632.553	451.894	377.661	622.26
P11388;P11388-2;P11388-3;P11388-4	P11388;P11388-2;P11388-3;P11388-4	TOP2A_HUMAN	TOP2A	DNA topoisomerase 2-alpha		690.753	916.344
P11413;P11413-2;P11413-3	P11413;P11413-2;P11413-3	G6PD_HUMAN	G6PD	Glucose-6-phosphate 1-dehydrogenase	38844.8	35960	33750.3	36528.4
P11498	P11498;P11498-2	PYC_HUMAN	PC	Pyruvate carboxylase, mitochondrial	886.476	1064.61	1195.25	785.422
P11586	P11586	C1TC_HUMAN	MTHFD1	C-1-tetrahydrofolate synthase, cytoplasmic	5218.81	4334.65	4136.06	5972.69
P11766	P11766	ADHX_HUMAN	ADH5	Alcohol dehydrogenase class-3	301.921
P11940;P11940-2	P11940;Q4VXU2;P11940-2;Q4VXU2-2	PABP1_HUMAN	PABPC1	Polyadenylate-binding protein 1	4219.83	4007.8	3514.19	4717.58
P12004	P12004	PCNA_HUMAN	PCNA	Proliferating cell nuclear antigen	5587.92	6079.21	5483.49	5895.91
P12268	P12268	IMDH2_HUMAN	IMPDH2	Inosine-5'-monophosphate dehydrogenase 2	1072.31	1228.66	676.929	1256.51
P12532;P12532-2	P12532;P12532-2	KCRU_HUMAN	CKMT1A	Creatine kinase U-type, mitochondrial		817.307	1982.27
P12814;P12814-2;P12814-3;P12814-4	O43707;P12814;O43707-2;P12814-2;P12814-3;P12814-4;O43707-3	ACTN1_HUMAN	ACTN1	Alpha-actinin-1	1907.01	1841.95	1217.96	2259.93
P12956	P12956;P12956-2	XRCC6_HUMAN	XRCC6	X-ray repair cross-complementing protein 6	32678.1	29432.5	30811.1	29682.4
P13010	P13010	XRCC5_HUMAN	XRCC5	X-ray repair cross-complementing protein 5	13575.7	11947.2	10859.4	13808.5
P13489	P13489	RINI_HUMAN	RNH1	Ribonuclease inhibitor	876.222	429.884	449.095	738.722
P13639	P13639	EF2_HUMAN	EEF2	Elongation factor 2	57301.2	62511.7	61349.3	49864.9
P13645	P02533;P08779;P13645;Q7Z3Y7;Q7Z3Y8;Q7Z3Y9;Q7Z3Z0	K1C10_HUMAN	KRT10	Keratin, type I cytoskeletal 10			955.449	1148.53
P13667	P13667	PDIA4_HUMAN	PDIA4	Protein disulfide-isomerase A4	18803.8	17437.1	19428.5	359000
P13798	P13798	ACPH_HUMAN	APEH	Acylamino-acid-releasing enzyme	2431.39	1674.09	1955.18	4193.44
P13804	P13804;P13804-2	ETFA_HUMAN	ETFA	Electron transfer flavoprotein subunit alpha, mitochondrial	3557.47	4096.1	2692.93	2063.03
P13807;P13807-2	P13807;P13807-2	GYS1_HUMAN	GYS1	Glycogen [starch] synthase, muscle	669.833	771.218		800.401
P13929;P13929-2;P13929-3	P13929;P13929-2;P13929-3	ENOB_HUMAN	ENO3	Beta-enolase	5873.83	4640.13	3792.53	6317.61
P14174	P14174	MIF_HUMAN	MIF	Macrophage migration inhibitory factor	14398	15128.4	11463.3	46189.5
P14618	P14618;P14618-2;P14618-3	KPYM_HUMAN	PKM	Pyruvate kinase PKM	114758	109601	112028	111368
P14618-2	P14618-2	KPYM_HUMAN	PKM	Isoform M1 of Pyruvate kinase PKM	2315.41	1617.39	1308.01	2346.76
P14625	P14625	ENPL_HUMAN	HSP90B1	Endoplasmin	4740.62	4675.62	3770.59	6070.95
P14678;P14678-2;P14678-3	P14678;P14678-2;P63162;P14678-3;P63162-2	RSMB_HUMAN	SNRPB	Small nuclear ribonucleoprotein-associated proteins B and B'	2078.45	2233.48	2019.14	1740.38
P14735	P14735	IDE_HUMAN	IDE	Insulin-degrading enzyme	3255.71	3278.44	3289.41	3110.04
P14866	P14866;P14866-2	HNRPL_HUMAN	HNRNPL	Heterogeneous nuclear ribonucleoprotein L	1636.77	2235.59	1832.45	1991.73
P14868	P14868	SYDC_HUMAN	DARS1	Aspartate--tRNA ligase, cytoplasmic	11465	11290.1	11233.6	11241.7
P15259;P18669	P15259;P18669	PGAM1_HUMAN;PGAM2_HUMAN	PGAM1;PGAM2	Phosphoglycerate mutase 2	11446.8	9229.28	7817.7	12472.9
P15311	P15311	EZRI_HUMAN	EZR	Ezrin	5684.86	6285.82	6028.34	5026.71
P15374	P15374	UCHL3_HUMAN	UCHL3	Ubiquitin carboxyl-terminal hydrolase isozyme L3	5446.29	4939.48	5877.64
P15559;P15559-2;P15559-3	P15559;P15559-2;P15559-3	NQO1_HUMAN	NQO1	NAD(P)H dehydrogenase [quinone] 1	11042.6	9618.23	10455.7	10603.8
P15880	P15880	RS2_HUMAN	RPS2	Small ribosomal subunit protein uS5	4188.71	3733.8	3130.75	5045.67
P15924	P15924;P15924-2;P15924-3	DESP_HUMAN	DSP	Desmoplakin	1061.51	1280.3	1622.96	1346.07
P15927;P15927-2;P15927-3	P15927;P15927-2;P15927-3	RFA2_HUMAN	RPA2	Replication protein A 32 kDa subunit	1863.09	2445.58	1777.28	2135.25
P16152;P16152-2	P16152;P16152-2	CBR1_HUMAN	CBR1	Carbonyl reductase [NADPH] 1	1164.4	921.694	923.536	1513.2
P16278;P16278-3	P16278;P16278-2;P16278-3	BGAL_HUMAN	GLB1	Beta-galactosidase	1026.85	1621.05	1430.09	1094.41
P16401	P16401	H15_HUMAN	H1-5	Histone H1.5	4453.17	3058.9	2606.39	8886.31
P16930	P16930;P16930-2	FAAA_HUMAN	FAH	Fumarylacetoacetase	7087.65	7121.26	5555.39	5738.94
P16989;P16989-2;P16989-3;P67809;Q9Y2T7	P16989;P67809;Q9Y2T7;P16989-2;P16989-3	YBOX1_HUMAN;YBOX2_HUMAN;YBOX3_HUMAN	YBX1;YBX2;YBX3	Y-box-binding protein 3	489.552	783.301	338.666	435.991
P17174	P17174	AATC_HUMAN	GOT1	Aspartate aminotransferase, cytoplasmic	2060.23	1472.05	1371.76	1860.44
P17301	P17301	ITA2_HUMAN	ITGA2	Integrin alpha-2	896.182	711.019	581.601
P17612;P17612-2	P17612;P17612-2	KAPCA_HUMAN	PRKACA	cAMP-dependent protein kinase catalytic subunit alpha	545.087	417.795	99.844	727.66
P17706;P17706-2;P17706-3;P17706-4	P17706;P17706-2;P17706-3;P17706-4	PTN2_HUMAN	PTPN2	Tyrosine-protein phosphatase non-receptor type 2	1118.57	877.509	879.097	857.112
P17812	P17812	PYRG1_HUMAN	CTPS1	CTP synthase 1	685.124	423.069	423.355	361.846
P17844;P17844-2	P17844;Q92841;P17844-2;Q92841-1;Q92841-2;Q92841-3	DDX5_HUMAN	DDX5	Probable ATP-dependent RNA helicase DDX5	1578.1	1461.88	910.931	1759.03
P17858;P17858-2	P17858;P17858-2	PFKAL_HUMAN	PFKL	ATP-dependent 6-phosphofructokinase, liver type	2912.97	2660.44	2372.42	2785.88
P17987	P17987	TCPA_HUMAN	TCP1	T-complex protein 1 subunit alpha	6775.36	5558.02	6051.18	5907.19
P18077	P18077	RL35A_HUMAN	RPL35A	Large ribosomal subunit protein eL33	19847.4	22799	23218.2	17197.6
P18085	P18085	ARF4_HUMAN	ARF4	ADP-ribosylation factor 4	3661.13	3303.39	3330.68	2976.01
P18124	P18124	RL7_HUMAN	RPL7	Large ribosomal subunit protein uL30	12171	12045.5	10794.4	16822.3
P18440	P18440	ARY1_HUMAN	NAT1	Arylamine N-acetyltransferase 1	2090.9	2065.13	2025.07	2116.43
P18621;P18621-2;P18621-3	P18621;P18621-2;P18621-3	RL17_HUMAN	RPL17	Large ribosomal subunit protein uL22	1139.76	1204.78	877.139	1746.26
P18754;P18754-2	P18754;P18754-2	RCC1_HUMAN	RCC1	Regulator of chromosome condensation	10055.7	11142.7	10680.8	9017.84
P19174;P19174-2	P19174;P19174-2	PLCG1_HUMAN	PLCG1	1-phosphatidylinositol 4,5-bisphosphate phosphodiesterase gamma-1	2053.21	2267.72	2207.69	2690.59
P19338	P19338	NUCL_HUMAN	NCL	Nucleolin	4366.53	4788.46	4159.32	5214.72
P19367;P19367-2;P19367-3;P19367-4	P19367;P52789;P19367-2;P19367-3;P19367-4	HXK1_HUMAN	HK1	Hexokinase-1	1378.7	1620.85	1547.79	1422.38
P19525;P19525-2	P19525;P19525-2	E2AK2_HUMAN	EIF2AK2	Interferon-induced, double-stranded RNA-activated protein kinase	1557.68	1483.45	1430.92	1316.79
P19623	P19623	SPEE_HUMAN	SRM	Spermidine synthase	46769.5	54680.8	36271.5	39820.9
P19823	P19823	ITIH2_HUMAN	ITIH2	Inter-alpha-trypsin inhibitor heavy chain H2	1673.88	2442.01	2224.08	2770.34
P20339;P20339-2	P20339;P51148;P61020;P51148-2;P20339-2;P61020-2	RAB5A_HUMAN	RAB5A	Ras-related protein Rab-5A	2844.81	2012.95	1305.34	2171.52
P20340;P20340-2	P20340;Q9NRW1;P20340-2;P20340-3	RAB6A_HUMAN	RAB6A	Ras-related protein Rab-6A	2561.08	2286.95	2603.61	2316.49
P20585	P20585	MSH3_HUMAN	MSH3	DNA mismatch repair protein Msh3	3178.81	2963.75	3059.08	3269.36
P20618	P20618	PSB1_HUMAN	PSMB1	Proteasome subunit beta type-1	2786.06	2382.17	2052.54	2364.04
P20839;P20839-2;P20839-3;P20839-4;P20839-5;P20839-6;P20839-7	P20839;P20839-3;P20839-2;P20839-4;P20839-5;P20839-6;P20839-7	IMDH1_HUMAN	IMPDH1	Inosine-5'-monophosphate dehydrogenase 1	1179.9	1267.74	1252.54	1110.78
P20936;P20936-2;P20936-4	P20936;P20936-2;P20936-4	RASA1_HUMAN	RASA1	Ras GTPase-activating protein 1	1308.31	1104.46	1176.67	1244.6
P21281	P21281	VATB2_HUMAN	ATP6V1B2	V-type proton ATPase subunit B, brain isoform	2918.95	2046.07	2330.78	16363.1
P21291	P21291	CSRP1_HUMAN	CSRP1	Cysteine and glycine-rich protein 1	889.738	851.611	832.073	932.064
P21333;P21333-2	P21333;P21333-2	FLNA_HUMAN	FLNA	Filamin-A	4173.66	4069.62	4320.53	5932.4
P21359;P21359-2;P21359-4;P21359-6	P21359;P21359-2;P21359-3;P21359-4;P21359-5;P21359-6	NF1_HUMAN	NF1	Neurofibromin	316.204		135.813
P21796	P21796	VDAC1_HUMAN	VDAC1	Voltage-dependent anion-selective channel protein 1	835.735	679.594	938.715	619.91
P21964;P21964-2	P21964;P21964-2	COMT_HUMAN	COMT	Catechol O-methyltransferase	519.628	828.119	409.106	965.754
P22059	P22059	OSBP1_HUMAN	OSBP	Oxysterol-binding protein 1	521.807	562.412	757.785	585.605
P22087	P22087	FBRL_HUMAN	FBL	rRNA 2'-O-methyltransferase fibrillarin	744.39	581.398	943.453	510.725
P22102	P22102;P22102-2	PUR2_HUMAN	GART	Trifunctional purine biosynthetic protein adenosine-3	4073.46	4082.23	4028.79	3716.1
P22234	P22234;P22234-2	PUR6_HUMAN	PAICS	Bifunctional phosphoribosylaminoimidazole carboxylase/phosphoribosylaminoimidazole succinocarboxamide synthetase	6496.16	6461.43	6455.96	7347.63
P22314;P22314-2	P22314;P22314-2	UBA1_HUMAN	UBA1	Ubiquitin-like modifier-activating enzyme 1	1213.83	1703.57	1164.69	1206.1
P22392;P22392-2	P15531;P22392;O60361;P22392-2;P15531-2	NDKB_HUMAN	NME2	Nucleoside diphosphate kinase B	2563.89	2823.95	1604.5	3932.35
P22626;P22626-2	P22626;P22626-2	ROA2_HUMAN	HNRNPA2B1	Heterogeneous nuclear ribonucleoproteins A2/B1	4427.89	4386.96	4077.99	4157.42
P22830;P22830-2	P22830;P22830-2	HEMH_HUMAN	FECH	Ferrochelatase, mitochondrial	2133.7	1585.54	1176.84	2322.83
P23284	P23284	PPIB_HUMAN	PPIB	Peptidyl-prolyl cis-trans isomerase B	5797.27	6340.93	5287.65	5460.34
P23381;P23381-2	P23381;P23381-2	SYWC_HUMAN	WARS1	Tryptophan--tRNA ligase, cytoplasmic	1227.42	906.167		833.51
P23396	P23396;P23396-2	RS3_HUMAN	RPS3	Small ribosomal subunit protein uS3	37454.2	34575	35304.7	31979.3
P23526	P23526;P23526-2	SAHH_HUMAN	AHCY	Adenosylhomocysteinase	19689.2	21328.5	20245.5	17572.4
P23528	P23528;Q9Y281;Q9Y281-3	COF1_HUMAN	CFL1	Cofilin-1	5434.79	5381.25	3713.59	5233.96
P23921	P23921	RIR1_HUMAN	RRM1	Ribonucleoside-diphosphate reductase large subunit	1703.08	1568.34	1210.17	1672.94
P24534	P24534	EF1B_HUMAN	EEF1B2	Elongation factor 1-beta	1396.54	1177.57	928.245	1669.37
P24928	P24928	RPB1_HUMAN	POLR2A	DNA-directed RNA polymerase II subunit RPB1	471.074	444.35
P25098	P25098;P35626	ARBK1_HUMAN	GRK2	Beta-adrenergic receptor kinase 1	1080.03	581.741	804.506	1101.04
P25103;P25103-3	P25103;P25103-3	NK1R_HUMAN	TACR1	Substance-P receptor	17701.9	12575.7	16888.2	29091.7
P25205;P25205-2	P25205;P25205-2	MCM3_HUMAN	MCM3	DNA replication licensing factor MCM3	9972.6	9261.46	9424.93	8907.74
P25398	P25398	RS12_HUMAN	RPS12	Small ribosomal subunit protein eS12	1786.21	1921.87	1358.17	1406.78
P25705;P25705-2	P25705;P25705-2	ATPA_HUMAN	ATP5F1A	ATP synthase subunit alpha, mitochondrial	1655.57	1757.72	1275.66	1871.03
P25786;P25786-2	P25786;P25786-2	PSA1_HUMAN	PSMA1	Proteasome subunit alpha type-1	625.341	597.422	102.451	1176.1
P25787	P25787	PSA2_HUMAN	PSMA2	Proteasome subunit alpha type-2	6194.1	4984.97	4810.33	5173.64
P25788;P25788-2	P25788;P25788-2	PSA3_HUMAN	PSMA3	Proteasome subunit alpha type-3	658.788	697.562	579.088	1155.16
P25789	P25789;P25789-2	PSA4_HUMAN	PSMA4	Proteasome subunit alpha type-4	5155.54	3012.41	3478.81	4099.19
P26196	P26196	DDX6_HUMAN	DDX6	Probable ATP-dependent RNA helicase DDX6	8330.41	6688.94	6099.8	7067.83
P26358;P26358-2	P26358;P26358-2;P26358-3	DNMT1_HUMAN	DNMT1	DNA (cytosine-5)-methyltransferase 1	2387.89	2289.34	2818.75	2418.46
P26373	P26373	RL13_HUMAN	RPL13	Large ribosomal subunit protein eL13	1790.39	1788.4	1903.88	1942.39
P26599;P26599-1;P26599-2	P26599;P26599-1;P26599-2	PTBP1_HUMAN	PTBP1	Polypyrimidine tract-binding protein 1	1477.61	1199.11	1553.65	1546.66
P26639;P26639-2	A2RTX5;P26639;A2RTX5-2;P26639-2	SYTC_HUMAN	TARS1	Threonine--tRNA ligase 1, cytoplasmic	8467.23	8050.73	8355.3	8108.07
P26640	P26640	SYVC_HUMAN	VARS1	Valine--tRNA ligase	4451.57	3928.79	3570.52	3993.48
P26641;P26641-2	P26641;P26641-2	EF1G_HUMAN	EEF1G	Elongation factor 1-gamma	12399.6	10770.4	8450.35	11732.1
P27348	P27348	1433T_HUMAN	YWHAQ	14-3-3 protein theta	604.055	963.093
P27635	P27635;Q96L21	RL10_HUMAN	RPL10	Large ribosomal subunit protein uL16	2667.1	2662.73	1926.79	2809.91
P27694	P27694	RFA1_HUMAN	RPA1	Replication protein A 70 kDa DNA-binding subunit	1872	1716.73	1471.04	1193.2
P27695	P27695	APEX1_HUMAN	APEX1	DNA-(apurinic or apyrimidinic site) endonuclease	1334.21	511.059	564.475	866.334
P27708	P27708	PYR1_HUMAN	CAD	CAD protein	8988.02	9530.9	9398.81	8604.9
P27797	P27797	CALR_HUMAN	CALR	Calreticulin	2136.47	2505.44	2087.24	2369.97
P27816;P27816-2;P27816-4;P27816-5;P27816-6	P27816;P27816-2;P27816-4;P27816-5;P27816-6	MAP4_HUMAN	MAP4	Microtubule-associated protein 4	374.735	327.515	382.269	743.93
P28066	P28066	PSA5_HUMAN	PSMA5	Proteasome subunit alpha type-5	579.585	422.716	265.726	352.872
P28070	P28070	PSB4_HUMAN	PSMB4	Proteasome subunit beta type-4	2596.03	2533.41	2426.34	2726.83
P28074	P28074;P28074-3	PSB5_HUMAN	PSMB5	Proteasome subunit beta type-5	6743.65	7190.49	7324.57	6772.81
P28340	P28340	DPOD1_HUMAN	POLD1	DNA polymerase delta catalytic subunit	33521.1	37915.6	37898.5	32514.1
P28838;P28838-2	P28838;P28838-2	AMPL_HUMAN	LAP3	Cytosol aminopeptidase	1217.55	1198.2	777.603	1497.34
P29144	P29144	TPP2_HUMAN	TPP2	Tripeptidyl-peptidase 2	527.996	1074.14	606.415	697.486
P29373	P29373	RABP2_HUMAN	CRABP2	Cellular retinoic acid-binding protein 2	620.266	966.779	582.13
P29401;P29401-2	P29401;P29401-2	TKT_HUMAN	TKT	Transketolase	30524.1	30751.2	32327.5	27841.6
P29692;P29692-2;P29692-3;P29692-4	P29692;P29692-2;P29692-3;P29692-4	EF1D_HUMAN	EEF1D	Elongation factor 1-delta	428.56	396.856	423.593	670.318
P30040;P30040-2	P30040;P30040-2	ERP29_HUMAN	ERP29	Endoplasmic reticulum resident protein 29	4814.97	4682.06	5091.47	8635.38
P30041	P30041	PRDX6_HUMAN	PRDX6	Peroxiredoxin-6	40228.4	38142.2	40074.1	46854.3
P30043	P30043	BLVRB_HUMAN	BLVRB	Flavin reductase (NADPH)	4525.69	3843.79	4065.67	4714.16
P30048;P30048-2	P30048;P30048-2	PRDX3_HUMAN	PRDX3	Thioredoxin-dependent peroxide reductase, mitochondrial	3286.75	3739.46	3029.56	6529.74
P30050	P30050	RL12_HUMAN	RPL12	Large ribosomal subunit protein uL11	17954.7	17534.2	15823.9	15167.7
P30085;P30085-3	P30085;P30085-3;P30085-2	KCY_HUMAN	CMPK1	UMP-CMP kinase	2288.75	2621.95	1792.64	2544.99
P30086	P30086	PEBP1_HUMAN	PEBP1	Phosphatidylethanolamine-binding protein 1	2679	2542.43	2272.25	2365.45
P30153	P30153	2AAA_HUMAN	PPP2R1A	Serine/threonine-protein phosphatase 2A 65 kDa regulatory subunit A alpha isoform		254.811		418.07
P30520	P30520	PURA2_HUMAN	ADSS2	Adenylosuccinate synthetase isozyme 2	671.16	632.208	504.459	543.602
P30740;P30740-2	P30740;P50452;P50453;O75830;P30740-2;P50452-2	ILEU_HUMAN	SERPINB1	Leukocyte elastase inhibitor	698.563	668.164	677.006	842.557
P30876	P30876	RPB2_HUMAN	POLR2B	DNA-directed RNA polymerase II subunit RPB2	1258.81	1255.29	979.039	1164.46
P31040	P31040	SDHA_HUMAN	SDHA	Succinate dehydrogenase [ubiquinone] flavoprotein subunit, mitochondrial	459.749	769.251	832.419	1436.92
P31146	P31146	COR1A_HUMAN	CORO1A	Coronin-1A	457.595	394.063	546.867	548.815
P31150	P31150	GDIA_HUMAN	GDI1	Rab GDP dissociation inhibitor alpha	2455.39	2534.15	2397.73	3695.24
P31153	P31153;P31153-2	METK2_HUMAN	MAT2A	S-adenosylmethionine synthase isoform type-2	7715.11	8363.92	6594.22	6406.95
P31350;P31350-2	P31350;P31350-2	RIR2_HUMAN	RRM2	Ribonucleoside-diphosphate reductase subunit M2	3734.27	4123.77	2990.81	4789.35
P31689;P31689-2	P31689;P31689-2	DNJA1_HUMAN	DNAJA1	DnaJ homolog subfamily A member 1	764.158	488.098	504.261	713.594
P31749;P31749-2	P31749;P31749-2	AKT1_HUMAN	AKT1	RAC-alpha serine/threonine-protein kinase	1133.4	882.647	1057.28	1460.32
P31939	P31939;P31939-2	PUR9_HUMAN	ATIC	Bifunctional purine biosynthesis protein ATIC	16534.9	15265.2	14035.5	23715.5
P31948;P31948-2;P31948-3	P31948;P31948-2;P31948-3	STIP1_HUMAN	STIP1	Stress-induced-phosphoprotein 1	1116.08	1452.74	1261.14	1529.53
P31949	P31949	S10AB_HUMAN	S100A11	Protein S100-A11	829.826	751.477	486.561	1171.82
P32119	P32119	PRDX2_HUMAN	PRDX2	Peroxiredoxin-2	15309.4	15175	13806	21419.6
P32321;P32321-2	P32321;P32321-2	DCTD_HUMAN	DCTD	Deoxycytidylate deaminase	1760.3	1678.41	1560.85	1342.11
P32969	P32969	RL9_HUMAN	RPL9	Large ribosomal subunit protein uL6	3582.64	3984.13	4058.63	3214.68
P33176	O60282;P33176;Q12840	KINH_HUMAN	KIF5B	Kinesin-1 heavy chain	2077.37	1789.84	1827.71	1798.69
P33947;P33947-2	P33947;P33947-2	ERD22_HUMAN	KDELR2	ER lumen protein-retaining receptor 2	694.536	483.783	547.812	394.345
P33991	P33991	MCM4_HUMAN	MCM4	DNA replication licensing factor MCM4	5143.24	5016.04	4612.72	4487.55
P33992	P33992	MCM5_HUMAN	MCM5	DNA replication licensing factor MCM5	17577.1	18443.1	19932.4	20877.2
P33993	P33993;P33993-3	MCM7_HUMAN	MCM7	DNA replication licensing factor MCM7	22995.7	17825.1	15741.7	22640.1
P34896;P34896-2;P34896-3	P34896;P34896-2;P34896-3;P34896-4	GLYC_HUMAN	SHMT1	Serine hydroxymethyltransferase, cytosolic	3832.9	3973.15	3903.97	3665.78
P34932	P34932	HSP74_HUMAN	HSPA4	Heat shock 70 kDa protein 4	4630.93	4845.26	5155.08	3995.03
P35080	P35080	PROF2_HUMAN	PFN2	Profilin-2	6252.87	6087.16	4826.38	5782.69
P35080-2	P35080-2	PROF2_HUMAN	PFN2	Isoform IIb of Profilin-2	3290.03	2443.21	2195.93	1879.42
P35237	P35237;P50452;P50452-2	SPB6_HUMAN	SERPINB6	Serpin B6	3370.44	2343.66	2458.7	2621.06
P35241;P35241-5	P35241;P35241-2;P35241-4;P35241-5	RADI_HUMAN	RDX	Radixin	781.609	1045.13	1492.94
P35268	P35268	RL22_HUMAN	RPL22	Large ribosomal subunit protein eL22	9250.91	8803.63	10470	7785.81
P35520;P35520-2	P35520;P35520-2	CBS_HUMAN	CBS	Cystathionine beta-synthase	1320.37	448.162	699.083	1099.78
P35527	P35527	K1C9_HUMAN	KRT9	Keratin, type I cytoskeletal 9				1662.95
P35573;P35573-2;P35573-3	P35573;P35573-2;P35573-3	GDE_HUMAN	AGL	Glycogen debranching enzyme	708.945	1182.81	979.9	681.353
P35579	P35579;P35579-2	MYH9_HUMAN	MYH9	Myosin-9	4232.41	3078.61	2275.91	4728.03
P35580;P35580-2;P35580-3;P35580-4;P35580-5	P35580;P35580-2;P35580-3;P35580-4;P35580-5	MYH10_HUMAN	MYH10	Myosin-10	1157.53	463.561	570.462	1168.92
P35606;P35606-2	P35606;P35606-2	COPB2_HUMAN	COPB2	Coatomer subunit beta'	3531.03	3522.03	4209.78	4031.05
P35813;P35813-2;P35813-3	O75688;P35813;O75688-2;O75688-4;O75688-5;P35813-2;P35813-3	PPM1A_HUMAN	PPM1A	Protein phosphatase 1A		249.298		508.026
P35908	P35908	K22E_HUMAN	KRT2	Keratin, type II cytoskeletal 2 epidermal	588.497	408.131	1087.58	719.305
P35998	P35998;P35998-2	PRS7_HUMAN	PSMC2	26S proteasome regulatory subunit 7	1598.15	1314.83	964.152	1826.84
P36404	P36404	ARL2_HUMAN	ARL2	ADP-ribosylation factor-like protein 2	512.117	473.37	286.71	331.757
P36405	P36405	ARL3_HUMAN	ARL3	ADP-ribosylation factor-like protein 3	975.151	444.255	406.071	570.505
P36578	P36578	RL4_HUMAN	RPL4	Large ribosomal subunit protein uL4	6441.35	5589.7	3888.55	8666
P36776;P36776-2;P36776-3	P36776;P36776-2;P36776-3	LONM_HUMAN	LONP1	Lon protease homolog, mitochondrial	290.338	341.751	215.966	379.831
P37108	P37108	SRP14_HUMAN	SRP14	Signal recognition particle 14 kDa protein	1218.83	1296.46	799.717	1142.92
P37837;P37837-2	P37837;P37837-2	TALDO_HUMAN	TALDO1	Transaldolase	1739.95	1635.93	2719.48	2796.24
P38159	P38159;O75526;P38159-2;P38159-3	RBMX_HUMAN	RBMX	RNA-binding motif protein, X chromosome	792.893	513.283	1167.36	12032.9
P38606;P38606-2	P38606;P38606-2	VATA_HUMAN	ATP6V1A	V-type proton ATPase catalytic subunit A	1455.2	1466.91	1029.35	1670.48
P38646	P38646	GRP75_HUMAN	HSPA9	Stress-70 protein, mitochondrial	1926.52	2005.42	1396.06	2753.96
P38919	P38919	IF4A3_HUMAN	EIF4A3	Eukaryotic initiation factor 4A-III	2561.45	1756.31	2205.93	1758.67
P39023	P39023;Q92901	RL3_HUMAN	RPL3	Large ribosomal subunit protein uL3	15951.5	16233.6	15922.7	13918.8
P39880;P39880-2;P39880-3;P39880-4;P39880-5;P39880-6;P39880-9;Q13948;Q13948-10;Q13948-2	P39880;Q13948;P39880-2;P39880-3;P39880-4;P39880-5;P39880-6;P39880-9;Q13948-10;Q13948-2	CASP_HUMAN;CUX1_HUMAN	CUX1	Homeobox protein cut-like 1	1834.74			1353.9
P40123	P40123;P40123-2	CAP2_HUMAN	CAP2	Adenylyl cyclase-associated protein 2	5016.39	5165.95	5551.83	3367.54
P40227	P40227;P40227-2	TCPZ_HUMAN	CCT6A	T-complex protein 1 subunit zeta	6413.57	4780.91	4877.06	6076.94
P40429	P40429;Q6NVV1	RL13A_HUMAN	RPL13A	Large ribosomal subunit protein uL13	3469.51	2601.45	2687.82	3058.27
P40616;P40616-2	P40616;P40616-2	ARL1_HUMAN	ARL1	ADP-ribosylation factor-like protein 1	3071.37	2614.64	2663.8	2522.06
P40692	P40692;P40692-2;P40692-3	MLH1_HUMAN	MLH1	DNA mismatch repair protein Mlh1	2586.14	3336.73		1144.51
P40763;P40763-2;P40763-3	P40763;P40763-2;P40763-3	STAT3_HUMAN	STAT3	Signal transducer and activator of transcription 3		681.401	616.711
P40818	P40818;P40818-2	UBP8_HUMAN	USP8	Ubiquitin carboxyl-terminal hydrolase 8	223883	241354	235663	11466.6
P40925;P40925-3	P40925;P40925-2;P40925-3	MDHC_HUMAN	MDH1	Malate dehydrogenase, cytoplasmic	2751.06	3119.3	1853.54	3948.34
P40926	P40926;P40926-2	MDHM_HUMAN	MDH2	Malate dehydrogenase, mitochondrial	15583.1	12833.2	10939.4	16678
P40939	P40939	ECHA_HUMAN	HADHA	Trifunctional enzyme subunit alpha, mitochondrial	1719.15	1707.51	1685.56	1588.15
P41091	P41091	IF2G_HUMAN	EIF2S3	Eukaryotic translation initiation factor 2 subunit 3	6857.68	6452.92	7573.14	5658.72
P41227;P41227-2	P41227;Q9BSU3;P41227-2	NAA10_HUMAN	NAA10	N-alpha-acetyltransferase 10	451.738	746.001	466.292	545.554
P41240	P41240	CSK_HUMAN	CSK	Tyrosine-protein kinase CSK	2527.21	1887.18	1397.5	2143.33
P41250;P41250-2	P41250;P41250-2	GARS_HUMAN	GARS1	Glycine--tRNA ligase	15957.3	15864	16353	13578.9
P41252	P41252	SYIC_HUMAN	IARS1	Isoleucine--tRNA ligase, cytoplasmic	16182.9	19630.2	22433.4	13126.3
P41743	P41743	KPCI_HUMAN	PRKCI	Protein kinase C iota type	1554.12	1592.84	1486.95	1345.15
P42224	P42224	STAT1_HUMAN	STAT1	Signal transducer and activator of transcription 1-alpha/beta	2154.63	1985.76	1546.41	1444.97
P42285	P42285	MTREX_HUMAN	MTREX	Exosome RNA helicase MTR4	1070.14	1549.98	2598.5	1907.11
P42345	P42345	MTOR_HUMAN	MTOR	Serine/threonine-protein kinase mTOR			321.478	1319.04
P42677	P42677;Q71UM5	RS27_HUMAN	RPS27	Small ribosomal subunit protein eS27	9579.85	9572.85	10233.4	8080.53
P42765	P42765	THIM_HUMAN	ACAA2	3-ketoacyl-CoA thiolase, mitochondrial	2331.54	1975.27	1937.5	2381.17
P42858	P42858	HD_HUMAN	HTT	Huntingtin	1177.64	979.422	1279.54	768.706
P43034	P43034	LIS1_HUMAN	PAFAH1B1	Platelet-activating factor acetylhydrolase IB subunit beta	2049.56	1952.88	2651.28	2652.38
P43246;P43246-2	P43246;P43246-2	MSH2_HUMAN	MSH2	DNA mismatch repair protein Msh2	2321.37	2759.05	2399.48	2786.98
P43490	P43490	NAMPT_HUMAN	NAMPT	Nicotinamide phosphoribosyltransferase	1078.35	1234.09	456.721	1041.11
P43686	P43686;P43686-2	PRS6B_HUMAN	PSMC4	26S proteasome regulatory subunit 6B	2567.17	1861.36	2232.98	156751
P43897	P43897;P43897-2	EFTS_HUMAN	TSFM	Elongation factor Ts, mitochondrial	3382.62	3369.79	3216.58	3302.6
P45877	P45877	PPIC_HUMAN	PPIC	Peptidyl-prolyl cis-trans isomerase C		920.724	562.315	996.666
P45974-2	P45974;P45974-2	UBP5_HUMAN	USP5	Isoform Short of Ubiquitin carboxyl-terminal hydrolase 5	292961	334520	327567	8239.56
P46063	P46063	RECQ1_HUMAN	RECQL	ATP-dependent DNA helicase Q1	3420.69	3880.55	4843.96	3948.68
P46087;P46087-2;P46087-3;P46087-4	P46087;P46087-2;P46087-3;P46087-4	NOP2_HUMAN	NOP2	Probable 28S rRNA (cytosine(4447)-C(5))-methyltransferase	924.766	809.886	963.883	1134.07
P46734;P46734-2;P46734-3	P46734;P46734-2;P46734-3	MP2K3_HUMAN	MAP2K3	Dual specificity mitogen-activated protein kinase kinase 3		231.646	264.79	256.493
P46776	P46776	RL27A_HUMAN	RPL27A	Large ribosomal subunit protein uL15	10187.8	10211.3	6859.96	11196.3
P46777	P46777	RL5_HUMAN	RPL5	Large ribosomal subunit protein uL18	10454	11921.2	11625.1	10087.6
P46778	P46778	RL21_HUMAN	RPL21	Large ribosomal subunit protein eL21	10088.5	8353.96	7147.5	7917.92
P46779;P46779-2;P46779-3;P46779-4;P46779-5	P46779;P46779-2;P46779-3;P46779-4;P46779-5	RL28_HUMAN	RPL28	Large ribosomal subunit protein eL28	2616.56	2595.6	2381.17	1776.21
P46781	P46781	RS9_HUMAN	RPS9	Small ribosomal subunit protein uS4	19283.2	15463.6	14538.9	17651.9
P46783	P46783	RS10_HUMAN	RPS10	Small ribosomal subunit protein eS10	1093.18	1096.77	612.175	949.043
P46934-4;Q96PU5;Q96PU5-2;Q96PU5-3;Q96PU5-5;Q96PU5-6;Q96PU5-7	Q96PU5;P46934-4;Q96PU5-2;Q96PU5-3;Q96PU5-5;Q96PU5-6;Q96PU5-7	NED4L_HUMAN;NEDD4_HUMAN	NEDD4;NEDD4L	Isoform 4 of E3 ubiquitin-protein ligase NEDD4	1000.84	931.754	724.613	865.487
P46940	P46940	IQGA1_HUMAN	IQGAP1	Ras GTPase-activating-like protein IQGAP1	1077.68	961.098	967.825	956.822
P47755	P47755	CAZA2_HUMAN	CAPZA2	F-actin-capping protein subunit alpha-2	996.564	938.814	945.157	540.053
P47756	P47756;P47756-1	CAPZB_HUMAN	CAPZB	F-actin-capping protein subunit beta	6852.05	5504.76	6273.74	4025.64
P47897;P47897-2	P47897;P47897-2	SYQ_HUMAN	QARS1	Glutamine--tRNA ligase	2994.35	2636.1	2342.73	2524.89
P47914	P47914	RL29_HUMAN	RPL29	Large ribosomal subunit protein eL29	2490.2	1250.14	1036.5	4901.87
P48147	P48147	PPCE_HUMAN	PREP	Prolyl endopeptidase	309.462	418.04	322.244	516.63
P48163	P48163	MAOX_HUMAN	ME1	NADP-dependent malic enzyme	1233.1	1048.77	759.495	1450.22
P48444	P48444;P48444-2	COPD_HUMAN	ARCN1	Coatomer subunit delta	3917.35	4023.38	4411.43	3035.44
P48506	P48506	GSH1_HUMAN	GCLC	Glutamate--cysteine ligase catalytic subunit	2367.16	2313.27	2008.39	2202.41
P48637	P48637	GSHB_HUMAN	GSS	Glutathione synthetase	1964.5	1357.72	1246.24	1493.67
P48643;P48643-2	P48643;P48643-2	TCPE_HUMAN	CCT5	T-complex protein 1 subunit epsilon	1894.57	1614.43	1521.08	2221.88
P48729;P48729-3	P48729;Q8N752;P48729-2;P48729-3	KC1A_HUMAN	CSNK1A1	Casein kinase I isoform alpha	3453.05	3005.04	2935.77	3322.87
P48735	P48735;P48735-2	IDHP_HUMAN	IDH2	Isocitrate dehydrogenase [NADP], mitochondrial	2346.44	1899.62	1580.09	2274.01
P48741	P17066;P48741	HSP77_HUMAN	HSPA7	Putative heat shock 70 kDa protein 7	9357.85	7451.98	8166	9375.07
P49189	P49189;P49189-2;P49189-3	AL9A1_HUMAN	ALDH9A1	4-trimethylaminobutyraldehyde dehydrogenase	2291.05	2379.98	1335.93	1909.91
P49327	P49327	FAS_HUMAN	FASN	Fatty acid synthase	49772.3	53628.4	60342.9	44362.8
P49368;P49368-2	P49368;P49368-2	TCPG_HUMAN	CCT3	T-complex protein 1 subunit gamma	2248.6	1842.95	1299.54	2550.08
P49406	P49406	RM19_HUMAN	MRPL19	Large ribosomal subunit protein bL19m	1287.44	731.546	692.652	1075.58
P49411	P49411	EFTU_HUMAN	TUFM	Elongation factor Tu, mitochondrial	18033.5	16815.2	18432.9	14554.5
P49419-2	P49419;P49419-2;P49419-4	AL7A1_HUMAN	ALDH7A1	Isoform 2 of Alpha-aminoadipic semialdehyde dehydrogenase	1711.66	1854.5	1349.11	7611.35
P49458	P49458	SRP09_HUMAN	SRP9	Signal recognition particle 9 kDa protein	2173.6	2564.79	1545.25	1888
P49588;P49588-2	P49588;P49588-2	SYAC_HUMAN	AARS1	Alanine--tRNA ligase, cytoplasmic	2341.37	2343.05	1895.24	2015.13
P49589-3	P49589;P49589-2;P49589-3	SYCC_HUMAN	CARS1	Isoform 3 of Cysteine--tRNA ligase, cytoplasmic	1907.75	1597.96	1848.36	15726.3
P49591	P49591	SYSC_HUMAN	SARS1	Serine--tRNA ligase, cytoplasmic	1924.93	1472.21	1546.61	1854.9
P49720	P49720	PSB3_HUMAN	PSMB3	Proteasome subunit beta type-3	2813.69	3440.23	2711.64	2489.04
P49721	P49721	PSB2_HUMAN	PSMB2	Proteasome subunit beta type-2	2875.5	2084.21	1742.78	3533.64
P49736	P49736	MCM2_HUMAN	MCM2	DNA replication licensing factor MCM2	6771.47	5895.98	5577.49	6802.09
P49761;P49761-1;P49761-3	P49761;P49761-1;P49761-3	CLK3_HUMAN	CLK3	Dual specificity protein kinase CLK3		218.283
P49773	P49773	HINT1_HUMAN	HINT1	Adenosine 5'-monophosphoramidase HINT1	1306.43	1356.6		1184.18
P49792	P49792	RBP2_HUMAN	RANBP2	E3 SUMO-protein ligase RanBP2	982.257	819.885	1042.89	854.994
P49902;P49902-2	P49902;P49902-2	5NTC_HUMAN	NT5C2	Cytosolic purine 5'-nucleotidase		721.019
P49915;P49915-2	P49915;P49915-2	GUAA_HUMAN	GMPS	GMP synthase [glutamine-hydrolyzing]	8139.89	7472.72	6558.2	9134.39
P49959;P49959-2;P49959-3	P49959;P49959-2;P49959-3	MRE11_HUMAN	MRE11	Double-strand break repair protein MRE11	785.385	1054.22	464.508	852.67
P50395	P50395;P50395-2	GDIB_HUMAN	GDI2	Rab GDP dissociation inhibitor beta	19953.1	18981.8	18406.9	19329.3
P50454	P50454	SERPH_HUMAN	SERPINH1	Serpin H1	5732.68	5136.57	5487.16	7795.77
P50552	P50552	VASP_HUMAN	VASP	Vasodilator-stimulated phosphoprotein	798.475	1034.17	942.484	887.755
P50570;P50570-2;P50570-5	P50570;P50570-2;Q9UQ16;P50570-3;P50570-4;P50570-5;Q9UQ16-2;Q9UQ16-3;Q9UQ16-4	DYN2_HUMAN	DNM2	Dynamin-2	2172.01	2711.04	2394.96	1673.28
P50748	P50748	KNTC1_HUMAN	KNTC1	Kinetochore-associated protein 1	1397.99	1399.17	1482.85	1315.98
P50851;P50851-2	P50851;P50851-2	LRBA_HUMAN	LRBA	Lipopolysaccharide-responsive and beige-like anchor protein	1909.06	2534.43	2437.17	1585.13
P50914	P50914	RL14_HUMAN	RPL14	Large ribosomal subunit protein eL14	3493.65	3338.51	3434.78	5920.88
P50990	P50990;P50990-2;P50990-3	TCPQ_HUMAN	CCT8	T-complex protein 1 subunit theta	4529.78	3747.53	3037.28	3897.15
P50991	P50991;P50991-2	TCPD_HUMAN	CCT4	T-complex protein 1 subunit delta	3275.73	2998.35	2368.37	3039.64
P51114;P51114-2;P51114-3	P51114;P51114-2;P51114-3	FXR1_HUMAN	FXR1	RNA-binding protein FXR1	2102.4	2720.47	3032.48	1858.11
P51148;P51148-2	P51148;P51148-2	RAB5C_HUMAN	RAB5C	Ras-related protein Rab-5C	3644.23	2199.74	2752.43	2461.26
P51149	P51149	RAB7A_HUMAN	RAB7A	Ras-related protein Rab-7a	2141.23	1928.92	1971.03	1904.43
P51531;P51531-2;P51532;P51532-2;P51532-3;P51532-4;P51532-5	P51531;P51532;P51531-2;P51532-2;P51532-3;P51532-4;P51532-5	SMCA2_HUMAN;SMCA4_HUMAN	SMARCA2;SMARCA4	Probable global transcription activator SNF2L2	573.279		170.627	326.011
P51610;P51610-2;P51610-4	P51610;P51610-2;P51610-4	HCFC1_HUMAN	HCFC1	Host cell factor 1	877.01	919.536	606.403	666.178
P51659	P51659	DHB4_HUMAN	HSD17B4	Peroxisomal multifunctional enzyme type 2	1705.25	1220.14	1401.86	1355.15
P51784	P51784	UBP11_HUMAN	USP11	Ubiquitin carboxyl-terminal hydrolase 11	5409.81	5630.04	5563.75
P51812;Q15349;Q15349-2;Q15349-3	P51812;Q15349;Q15418;Q9UK32;Q15349-2;Q15349-3;Q15418-2;Q15418-3;Q15418-4;Q9UK32-2	KS6A2_HUMAN;KS6A3_HUMAN	RPS6KA2;RPS6KA3	Ribosomal protein S6 kinase alpha-3	393.897	357.926	294.052	371.202
P51965;P51965-2;P51965-3;Q969T4;Q96LR5	P51965;Q969T4;Q96LR5;P51965-2;P51965-3	UB2E1_HUMAN;UB2E2_HUMAN;UB2E3_HUMAN	UBE2E1;UBE2E2;UBE2E3	Ubiquitin-conjugating enzyme E2 E1	900.321	873.433	1343.62	279.884
P51991;P51991-2	P51991;P51991-2	ROA3_HUMAN	HNRNPA3	Heterogeneous nuclear ribonucleoprotein A3	1730.4	1829.31	1929.48	3401
P52209;P52209-2	P52209;P52209-2	6PGD_HUMAN	PGD	6-phosphogluconate dehydrogenase, decarboxylating	1022.69	391.243	588.514	1492.7
P52434;P52434-3	P52434;P52434-3	RPAB3_HUMAN	POLR2H	DNA-directed RNA polymerases I, II, and III subunit RPABC3	2822.78	2471.13	2740.23	2376.86
P52565	P52565	GDIR1_HUMAN	ARHGDIA	Rho GDP-dissociation inhibitor 1	4676.63	4208.86	4134.28	5782.01
P52701	P52701;P52701-2;P52701-3;P52701-4	MSH6_HUMAN	MSH6	DNA mismatch repair protein Msh6	8046.24	7910.19	7922.23	7302.51
P52735;P52735-2;P52735-3	P52735;P52735-2;P52735-3	VAV2_HUMAN	VAV2	Guanine nucleotide exchange factor VAV2	1070.49	1196.5	1154.54	776.213
P52788;P52788-2	P52788;P52788-2	SPSY_HUMAN	SMS	Spermine synthase	709.264	1013.14	799.388	996.671
P52895	P42330;P52895;Q04828;P42330-2	AK1C2_HUMAN	AKR1C2	Aldo-keto reductase family 1 member C2	1802.16	1423.76	779.658	1497.54
P52907	P47755;P52907;P47755-2	CAZA1_HUMAN	CAPZA1	F-actin-capping protein subunit alpha-1	3171.96	3320.26	2892.56	2812.39
P53004	P53004	BIEA_HUMAN	BLVRA	Biliverdin reductase A	10870.3	9259.67	9106.71	9106.96
P53041	P53041	PPP5_HUMAN	PPP5C	Serine/threonine-protein phosphatase 5	715.184	691.016		550.765
P53384;P53384-2	P53384;P53384-2	NUBP1_HUMAN	NUBP1	Cytosolic Fe-S cluster assembly factor NUBP1	1036	1149.82	840.849	807.62
P53396;P53396-2	P53396;P53396-2	ACLY_HUMAN	ACLY	ATP-citrate synthase	11950.4	12963.5	12381.1	11135.5
P53597	P53597	SUCA_HUMAN	SUCLG1	Succinate--CoA ligase [ADP/GDP-forming] subunit alpha, mitochondrial	1157.37	1530.64	1521.35	1118.06
P53602	P53602	MVD1_HUMAN	MVD	Diphosphomevalonate decarboxylase	803.13	1432.78	1604.8	1070.84
P53618	P53618	COPB_HUMAN	COPB1	Coatomer subunit beta	4893.12	5299.45	5762	3276.13
P53621;P53621-2	P53621;P53621-2	COPA_HUMAN	COPA	Coatomer subunit alpha	2857.57	2807.38	2861.77	2252.76
P53680;P53680-2	P53680;P53680-2	AP2S1_HUMAN	AP2S1	AP-2 complex subunit sigma	207.942	339.082		391.458
P53992	P53992	SC24C_HUMAN	SEC24C	Protein transport protein Sec24C	570.689	703.755	611.89	679.412
P54136;P54136-2	P54136;P54136-2	SYRC_HUMAN	RARS1	Arginine--tRNA ligase, cytoplasmic	1647.3	1376.82	960.161	1813.59
P54577	P54577	SYYC_HUMAN	YARS1	Tyrosine--tRNA ligase, cytoplasmic	873.233	1101.73	1305.6	1077.24
P54578	P54578;P54578-2;P54578-3	UBP14_HUMAN	USP14	Ubiquitin carboxyl-terminal hydrolase 14	117558	124120	128457	3127.52
P54727	P54727	RD23B_HUMAN	RAD23B	UV excision repair protein RAD23 homolog B	335.316	804.313		620.278
P54886;P54886-2	P54886;P54886-2	P5CS_HUMAN	ALDH18A1	Delta-1-pyrroline-5-carboxylate synthase	5294.46	6489.18	6323.94	5356.82
P55039	P55039	DRG2_HUMAN	DRG2	Developmentally-regulated GTP-binding protein 2	1665.39	1730.26	1920.33	1495.09
P55060;P55060-3;P55060-4	P55060;P55060-3;P55060-4	XPO2_HUMAN	CSE1L	Exportin-2	547.591	1195.67
P55072	P55072	TERA_HUMAN	VCP	Transitional endoplasmic reticulum ATPase	5336.96	5281.93	4567.48	6276.01
P55160;P55160-2	P55160;P55160-2	NCKPL_HUMAN	NCKAP1L	Nck-associated protein 1-like		1013.02	928.902	1069.63
P55209;P55209-2;P55209-3	P55209;P55209-2;P55209-3	NP1L1_HUMAN	NAP1L1	Nucleosome assembly protein 1-like 1	361.097	425.855	474.433	850.393
P55212;P55212-2	P55212;P55212-2	CASP6_HUMAN	CASP6	Caspase-6	1414.89	1408.91	1641.31	3089.5
P55263;P55263-2;P55263-3	P55263;P55263-2;P55263-3;P55263-4	ADK_HUMAN	ADK	Adenosine kinase	3144.36	2555.02	1616.75	3763.36
P55265;P55265-2;P55265-3;P55265-4;P55265-5	P55265;P55265-2;P55265-3;P55265-4;P55265-5	DSRAD_HUMAN	ADAR	Double-stranded RNA-specific adenosine deaminase		458.352	394.106
P55735;P55735-2;P55735-3;P55735-4	P55735;P55735-3;P55735-2;P55735-4	SEC13_HUMAN	SEC13	Protein SEC13 homolog	1692.91	2099.69	1651.42	2086.8
P55786	P55786;A6NEC2;P55786-2	PSA_HUMAN	NPEPPS	Puromycin-sensitive aminopeptidase	4119.29	4023.69	4206.35	4507.54
P55884;P55884-2	P55884;P55884-2	EIF3B_HUMAN	EIF3B	Eukaryotic translation initiation factor 3 subunit B	3426.96	3387.49	2950.98	3994.87
P56192	P56192	SYMC_HUMAN	MARS1	Methionine--tRNA ligase, cytoplasmic	3611.46	3020.41	3061.34	3293.01
P56537	P56537	IF6_HUMAN	EIF6	Eukaryotic translation initiation factor 6	3054.64	3497.81	3381.6	2457.92
P56545;P56545-2;P56545-3	P56545;P56545-3;Q13363;Q13363-2;P56545-2	CTBP2_HUMAN	CTBP2	C-terminal-binding protein 2	2568.16	1935.96	2347.35	3056.78
P57081;P57081-2	P57081;P57081-2	WDR4_HUMAN	WDR4	tRNA (guanine-N(7)-)-methyltransferase non-catalytic subunit WDR4	919.758	1233.92	1011.79	903.064
P57678	P57678	GEMI4_HUMAN	GEMIN4	Gem-associated protein 4	379.081
P57735	P57735	RAB25_HUMAN	RAB25	Ras-related protein Rab-25			383.019	395.759
P58107	P58107	EPIPL_HUMAN	EPPK1	Epiplakin	11538.1	12196.6	11888.4	9043.75
P59998;P59998-3	P59998;P59998-2;P59998-3	ARPC4_HUMAN	ARPC4	Actin-related protein 2/3 complex subunit 4	4439.54	5206.18	4309.51	3586.2
P60174;P60174-3	P60174;P60174-3;P60174-4	TPIS_HUMAN	TPI1	Triosephosphate isomerase	2045.97	2994.78	1325.1	3186.2
P60510	P60510	PP4C_HUMAN	PPP4C	Serine/threonine-protein phosphatase 4 catalytic subunit	2866.44	1967.77	1853.59	2825.18
P60709;P63261	P60709;P63261	ACTB_HUMAN;ACTG_HUMAN	ACTB;ACTG1	Actin, cytoplasmic 1	25057	22730.3	17353.5	29322.2
P60842	P60842;P60842-2	IF4A1_HUMAN	EIF4A1	Eukaryotic initiation factor 4A-I	44822.8	41169.8	37197.1	46168.8
P60866;P60866-2	P60866;P60866-2	RS20_HUMAN	RPS20	Small ribosomal subunit protein uS10	2278.78	2835.56	2229.89	2768.14
P60900;P60900-2	P60900;P60900-2;P60900-3	PSA6_HUMAN	PSMA6	Proteasome subunit alpha type-6	8476.65	7232.59	6799.48	8245.15
P60953	P60953;P60953-1	CDC42_HUMAN	CDC42	Cell division control protein 42 homolog	4463.35	5478.6	4891.77	3617.69
P60981;P60981-2	P60981;P60981-2	DEST_HUMAN	DSTN	Destrin	3536.56	2865.59	2450.92	4966.89
P61006	P61006	RAB8A_HUMAN	RAB8A	Ras-related protein Rab-8A	1554.95	2160.91	2315.47	1768.67
P61019	P61019;Q8WUD1	RAB2A_HUMAN	RAB2A	Ras-related protein Rab-2A	1740.19	1554.02	1601.68	1226.99
P61020;P61020-2	P61020;P61020-2	RAB5B_HUMAN	RAB5B	Ras-related protein Rab-5B	345.584	206.918
P61026	P61026	RAB10_HUMAN	RAB10	Ras-related protein Rab-10	5516.04	5679.63	6937.93	5151.83
P61077;P61077-2;P61077-3;P62837;P62837-2	P61077;P62837;P62837-2;P61077-2;P61077-3	UB2D2_HUMAN;UB2D3_HUMAN	UBE2D2;UBE2D3	Ubiquitin-conjugating enzyme E2 D3	3402.66	3981.16	3319.73	3206.47
P61088	P61088;Q5JXB2	UBE2N_HUMAN	UBE2N	Ubiquitin-conjugating enzyme E2 N	946.006	1012.91	721.284	1425.69
P61106	P61106	RAB14_HUMAN	RAB14	Ras-related protein Rab-14	2641.33	2586.14	2594.41	2441.83
P61158	P61158	ARP3_HUMAN	ACTR3	Actin-related protein 3	1696.72	1770.57	1256.95	1719.7
P61160;P61160-2	P61160;P61160-2	ARP2_HUMAN	ACTR2	Actin-related protein 2	887.741	452.604	777.347	476.483
P61204;P84077	P61204;P84077;P61204-2	ARF1_HUMAN;ARF3_HUMAN	ARF1;ARF3	ADP-ribosylation factor 3	11283	11021.8	10170.5	9810.74
P61221	P61221	ABCE1_HUMAN	ABCE1	ATP-binding cassette sub-family E member 1	2311.25	2400.26	2249.12	2296.99
P61224;P61224-2;P61224-3;P62834	P61224;P62834;A6NIZ1;P61224-2;P61224-3	RAP1A_HUMAN;RAP1B_HUMAN	RAP1A;RAP1B	Ras-related protein Rap-1b	2169.46	1676.39	1802.41	1859.19
P61247	P61247	RS3A_HUMAN	RPS3A	Small ribosomal subunit protein eS1	488.677	548.677	269.187	677.144
P61254	P61254;Q9UNX3	RL26_HUMAN	RPL26	Large ribosomal subunit protein uL24	6427.04	6789.22	6331.4	5951.86
P61313	P61313	RL15_HUMAN	RPL15	Large ribosomal subunit protein eL15	36892.2	36613.4	35859	38183.6
P61326;P61326-2;Q96A72	P61326;Q96A72;P61326-2	MGN2_HUMAN;MGN_HUMAN	MAGOH;MAGOHB	Protein mago nashi homolog	1409.33	906.125	721.483	1253.03
P61353	P61353	RL27_HUMAN	RPL27	Large ribosomal subunit protein eL27	7973.58	7656.65	6369.3	9129.66
P61513	P61513;A6NKH3	RL37A_HUMAN	RPL37A	Large ribosomal subunit protein eL43	1756.12	2173.91	1278.93	1285.35
P61960	P61960	UFM1_HUMAN	UFM1	Ubiquitin-fold modifier 1	1170.5		987.379	1194.57
P61962	P61962	DCAF7_HUMAN	DCAF7	DDB1- and CUL4-associated factor 7	2725.28	2986.85	3660.07	2602.66
P61964	P61964	WDR5_HUMAN	WDR5	WD repeat-containing protein 5	708.365	532.548	345.9	365.057
P61966;P61966-2	P56377;P61966;P61966-2;P56377-2	AP1S1_HUMAN	AP1S1	AP-1 complex subunit sigma-1A	3738.19	2513.19	2685.1	2521.36
P61970	P61970	NTF2_HUMAN	NUTF2	Nuclear transport factor 2	2473.53	1537.72	1103.15	2214.88
P61978;P61978-2;P61978-3	P61978;P61978-2;P61978-3	HNRPK_HUMAN	HNRNPK	Heterogeneous nuclear ribonucleoprotein K	2529.18	1621.8	1791.25	2759.8
P61981	P61981	1433G_HUMAN	YWHAG	14-3-3 protein gamma	1678.26	1505.04	3019.62	2199.96
P62068;P62068-4	P62068;P62068-2;P62068-3;P62068-4	UBP46_HUMAN	USP46	Ubiquitin carboxyl-terminal hydrolase 46	6723.58	8270.24	8349.93
P62081	P62081	RS7_HUMAN	RPS7	Small ribosomal subunit protein eS7	20200	15710.3	16895	26550.8
P62136;P62136-2	P62136;P62136-2;P62136-3	PP1A_HUMAN	PPP1CA	Serine/threonine-protein phosphatase PP1-alpha catalytic subunit	846.948	690.241	509.291	1914.49
P62195;P62195-2	P62195;P62195-2	PRS8_HUMAN	PSMC5	26S proteasome regulatory subunit 8	2151.43	1793.45	996.293	3095.34
P62241	P62241	RS8_HUMAN	RPS8	Small ribosomal subunit protein eS8	22491.7	24539.3	24924.6	19013.5
P62244	P62244	RS15A_HUMAN	RPS15A	Small ribosomal subunit protein uS8	14285	13678.1	14047.4	13742.8
P62249	P62249	RS16_HUMAN	RPS16	Small ribosomal subunit protein uS9	6146.98	5340.03	4664.47	7597.37
P62258	P62258	1433E_HUMAN	YWHAE	14-3-3 protein epsilon	31337.4	29261.6	21394.2	32919.2
P62263	P62263	RS14_HUMAN	RPS14	Small ribosomal subunit protein uS11	10346.9	7666.53	6514.08	7616.42
P62266	P62266	RS23_HUMAN	RPS23	Small ribosomal subunit protein uS12	14782.6	10873.5	11838.3	13369.9
P62269	P62269	RS18_HUMAN	RPS18	Small ribosomal subunit protein uS13	2957.24	4101.01	2476.09	5871.86
P62277	P62277	RS13_HUMAN	RPS13	Small ribosomal subunit protein uS15	1510.19	2048.63	1123.38	2666.17
P62280	P62280	RS11_HUMAN	RPS11	Small ribosomal subunit protein uS17	17655.4	17113	17099.7	13352
P62304	P62304	RUXE_HUMAN	SNRPE	Small nuclear ribonucleoprotein E	2154.65	1268.38	1154.79	1389.99
P62318;P62318-2	P62318;P62318-2	SMD3_HUMAN	SNRPD3	Small nuclear ribonucleoprotein Sm D3	2855.99	2629.27	2669.5	4591.6
P62330	P62330	ARF6_HUMAN	ARF6	ADP-ribosylation factor 6	3380.6	4119.83	3110.29	2665.84
P62333	P62333	PRS10_HUMAN	PSMC6	26S proteasome regulatory subunit 10B	939.197	505.109	491.995	1133.48
P62424	P62424	RL7A_HUMAN	RPL7A	Large ribosomal subunit protein eL8	8519.71	6023.08	5738.39	7830.54
P62491;P62491-2;Q15907;Q15907-2	P62491;Q15907;P62491-2;Q15907-2	RB11A_HUMAN;RB11B_HUMAN	RAB11A;RAB11B	Ras-related protein Rab-11A	1807.65	1683.47	1549.6	2147.32
P62495;P62495-2	P62495;P62495-2	ERF1_HUMAN	ETF1	Eukaryotic peptide chain release factor subunit 1	5451.48	5268.15	4466.3	5518.85
P62701	P62701;P22090;Q8TD47	RS4X_HUMAN	RPS4X	Small ribosomal subunit protein eS4, X isoform	7007.45	4895.97	4410.59	6382.24
P62750	P62750	RL23A_HUMAN	RPL23A	Large ribosomal subunit protein uL23	24980.3	11189.6	10947.5	23514
P62753	P62753	RS6_HUMAN	RPS6	Small ribosomal subunit protein eS6	30420.2	24962.8	25619.7	26945.7
P62820-2	P62820;P62820-2;P62820-3	RAB1A_HUMAN	RAB1A	Isoform 2 of Ras-related protein Rab-1A	1353.75	1239.42	1328.65	1257.78
P62826	P62826	RAN_HUMAN	RAN	GTP-binding nuclear protein Ran	84930.2	89750.3	100631	72523.5
P62829	P62829	RL23_HUMAN	RPL23	Large ribosomal subunit protein uL14	6595.78	6065.48	5512.66	6403.71
P62847;P62847-2;P62847-3;P62847-4	P62847;P62847-2;P62847-3;P62847-4	RS24_HUMAN	RPS24	Small ribosomal subunit protein eS24	16508	15549.9	15989.3	17675
P62857	P62857	RS28_HUMAN	RPS28	Small ribosomal subunit protein eS28	4042.54	2174.57	1938.09	3750.72
P62879	P62879;P62879-2	GBB2_HUMAN	GNB2	Guanine nucleotide-binding protein G(I)/G(S)/G(T) subunit beta-2	3628.49	3552.63	2879.38	2359.94
P62888	P62888	RL30_HUMAN	RPL30	Large ribosomal subunit protein eL30	6883.76	7939.81	6365.76	7596.96
P62899;P62899-2;P62899-3	P62899;P62899-2;P62899-3	RL31_HUMAN	RPL31	Large ribosomal subunit protein eL31	4678.16	5471.8	3807.87	5234.15
P62906	P62906	RL10A_HUMAN	RPL10A	Large ribosomal subunit protein uL1	2490.47	1483.17	1916.61	2999.34
P62910	P62910	RL32_HUMAN	RPL32	Large ribosomal subunit protein eL32	1742.71	1753.3	1123.51	2908.32
P62913;P62913-2	P62913;P62913-2	RL11_HUMAN	RPL11	Large ribosomal subunit protein uL5	4489.3	4055.6	4376.55	4541.24
P62917	P62917	RL8_HUMAN	RPL8	Large ribosomal subunit protein uL2	3362.54	2964.7	2389.7	2763.19
P62937	P62937	PPIA_HUMAN	PPIA	Peptidyl-prolyl cis-trans isomerase A	12415.1	12239	9078.04	15662
P62979	P0CG47;P0CG48;P62979;P62987	RS27A_HUMAN	RPS27A	Ubiquitin-ribosomal protein eS31 fusion protein	228874	333081	391488	8353.17
P63000;P63000-2	P15153;P60763;P63000;P63000-2	RAC1_HUMAN	RAC1	Ras-related C3 botulinum toxin substrate 1	5055.59	4145.46	4511.8	4143.15
P63104	P63104;P63104-2	1433Z_HUMAN	YWHAZ	14-3-3 protein zeta/delta	3041.66	3306.67	1995.05	4138.89
P63151;P63151-2	P63151;P63151-2	2ABA_HUMAN	PPP2R2A	Serine/threonine-protein phosphatase 2A 55 kDa regulatory subunit B alpha isoform	2830.16	3062.82	3165.85	2852.72
P63167;Q96FJ2	P63167;Q96FJ2	DYL1_HUMAN;DYL2_HUMAN	DYNLL1;DYNLL2	Dynein light chain 1, cytoplasmic	870.73	422.31	451.446	463.27
P63172	P63172	DYLT1_HUMAN	DYNLT1	Dynein light chain Tctex-type 1		540.083	295.528
P63173	P63173	RL38_HUMAN	RPL38	Large ribosomal subunit protein eL38	1541.7	1561.44	1674.09	3106.19
P63241;P63241-2	P63241;Q6IS14;P63241-2	IF5A1_HUMAN	EIF5A	Eukaryotic translation initiation factor 5A-1	3045.09	5170.91	4941.36	3473.55
P63244	P63244	RACK1_HUMAN	RACK1	Small ribosomal subunit protein RACK1	14174.1	15261.7	15663.3	14889.9
P63267	P62736;P63267;P68032;P68133	ACTH_HUMAN	ACTG2	Actin, gamma-enteric smooth muscle	1575.68	1664.05	1002.16	1437.39
P68104;Q5VTE0	P68104;Q5VTE0	EF1A1_HUMAN;EF1A3_HUMAN	EEF1A1;EEF1A1P5	Elongation factor 1-alpha 1	40488.4	40411.2	37717.4	29747.9
P68363	A6NHL2;P68363;P68366;Q71U36;Q9BQE3;P68363-2;P68366-2;Q71U36-2;A6NHL2-2	TBA1B_HUMAN	TUBA1B	Tubulin alpha-1B chain	67844.4	56861.4	45766.2	71628.3
P68371	P68371;Q13885;Q9BVA1	TBB4B_HUMAN	TUBB4B	Tubulin beta-4B chain	11283.2	10034.4	8461.59	12080.6
P68400;Q8NEV1	P68400;Q8NEV1	CSK21_HUMAN;CSK23_HUMAN	CSNK2A1;CSNK2A3	Casein kinase II subunit alpha		529.881		459.18
P68402	P68402	PA1B2_HUMAN	PAFAH1B2	Platelet-activating factor acetylhydrolase IB subunit alpha2	2202.06	1978.97	1457.83	5037.04
P78346;P78346-2	P78346;P78346-2	RPP30_HUMAN	RPP30	Ribonuclease P protein subunit p30	1152.54	1657.2	1313.71	1353.51
P78371	P78371	TCPB_HUMAN	CCT2	T-complex protein 1 subunit beta	1624.04	1921.51	1055.06	1463.57
P78417;P78417-3	P78417;P78417-3	GSTO1_HUMAN	GSTO1	Glutathione S-transferase omega-1	1599.5	1104.18	1060.99	2022.82
P78527	P78527;P78527-2	PRKDC_HUMAN	PRKDC	DNA-dependent protein kinase catalytic subunit	5635.58	5837.52	6975.88	4113.66
P83436	P83436	COG7_HUMAN	COG7	Conserved oligomeric Golgi complex subunit 7	1483.23	1692.52	1833.2	20804.1
P83731	P83731	RL24_HUMAN	RPL24	Large ribosomal subunit protein eL24	7419.89	6218.76	5377.46	5818.39
P84085	P84085	ARF5_HUMAN	ARF5	ADP-ribosylation factor 5	17373.3	19239.9	18310.3	17442.3
P84098	P84098	RL19_HUMAN	RPL19	Large ribosomal subunit protein eL19	402.422	714.678	587.392	477.049
P99999	P99999	CYC_HUMAN	CYCS	Cytochrome c	792.138	1294.88	1186.62	1205.97
Q00341;Q00341-2	Q00341;Q00341-2	VIGLN_HUMAN	HDLBP	Vigilin	1561.45	1454.54	1457.35	1586.43
Q00535	Q00535	CDK5_HUMAN	CDK5	Cyclin-dependent kinase 5	1209.66	835.358	901.549	693.966
Q00610;Q00610-2	P53675;Q00610;P53675-2;Q00610-2	CLH1_HUMAN	CLTC	Clathrin heavy chain 1	40232.9	43044.5	47357.7	36318.9
Q00796	Q00796	DHSO_HUMAN	SORD	Sorbitol dehydrogenase	6936.56	7478	6942.51	6593.57
Q00839;Q00839-2	Q00839;Q00839-2	HNRPU_HUMAN	HNRNPU	Heterogeneous nuclear ribonucleoprotein U	12318.4	13852.4	14256.1	11091.6
Q01082	Q01082	SPTB2_HUMAN	SPTBN1	Spectrin beta chain, non-erythrocytic 1	420.409	394.227	705.887	467.483
Q01130;Q01130-2;Q9BRL6;Q9BRL6-2	Q01130;Q9BRL6;Q01130-2;Q9BRL6-2	SRSF2_HUMAN;SRSF8_HUMAN	SRSF2;SRSF8	Serine/arginine-rich splicing factor 2	4997.49	4346.51	3752.06	5705.31
Q01518	P40123;Q01518;P40123-2;P40123-3;Q01518-2	CAP1_HUMAN	CAP1	Adenylyl cyclase-associated protein 1	7888.37	10894.3	11174.6	7161.17
Q01650	Q01650;Q92536;Q9UM01	LAT1_HUMAN	SLC7A5	Large neutral amino acids transporter small subunit 1	1253.71	981.688	1222.79	1209.81
Q01804	Q01804;Q01804-3;Q01804-5	OTUD4_HUMAN	OTUD4	OTU domain-containing protein 4	1887.85	1503.32	1284.86
Q01813	Q01813;Q01813-2	PFKAP_HUMAN	PFKP	ATP-dependent 6-phosphofructokinase, platelet type	5314.21	4947.91	4176.07	5518.3
Q01968;Q01968-2	Q01968;Q01968-2	OCRL_HUMAN	OCRL	Inositol polyphosphate 5-phosphatase OCRL	636.736		309.936	162.71
Q01970;Q01970-2	Q01970;Q01970-2	PLCB3_HUMAN	PLCB3	1-phosphatidylinositol 4,5-bisphosphate phosphodiesterase beta-3	3922.07	4948.71	4450.92	39724.3
Q02218	Q02218;Q02218-2;Q02218-3	ODO1_HUMAN	OGDH	2-oxoglutarate dehydrogenase complex component E1	2497.32	2563.42	2923.57	2197.29
Q02543	Q02543	RL18A_HUMAN	RPL18A	Large ribosomal subunit protein eL20	33849.3	29566.5	30299.2	30225
Q02790	Q02790	FKBP4_HUMAN	FKBP4	Peptidyl-prolyl cis-trans isomerase FKBP4	1953.72	1930.78	1695.69	1795.43
Q02878	Q02878	RL6_HUMAN	RPL6	Large ribosomal subunit protein eL6	59138.5	59094.5	57667.3	53866.8
Q03001;Q03001-13;Q03001-14	Q03001;Q03001-13;Q03001-14	DYST_HUMAN	DST	Dystonin			241.1
Q03426	Q03426	KIME_HUMAN	MVK	Mevalonate kinase	757.904		776.883	739.875
Q04206;Q04206-2;Q04206-3;Q04206-4	Q04206;Q04206-2;Q04206-3;Q04206-4	TF65_HUMAN	RELA	Transcription factor p65		893.986	1213.36	1086.7
Q04446	Q04446	GLGB_HUMAN	GBE1	1,4-alpha-glucan-branching enzyme	1247.25	838.207	887.338	1396.4
Q04637;Q04637-3;Q04637-4;Q04637-5;Q04637-6;Q04637-7;Q04637-8;Q04637-9	Q04637;Q04637-9;Q04637-3;Q04637-4;Q04637-5;Q04637-6;Q04637-7;Q04637-8	IF4G1_HUMAN	EIF4G1	Eukaryotic translation initiation factor 4 gamma 1	1302.64	1213.47	1455.87	1442.85
Q04837	Q04837	SSBP_HUMAN	SSBP1	Single-stranded DNA-binding protein, mitochondrial	1438.77	1139.04		1420.39
Q04864;Q04864-2	Q04864;Q04864-2	REL_HUMAN	REL	Proto-oncogene c-Rel	589.521	897.987	1493.97	925.886
Q04917	Q04917	1433F_HUMAN	YWHAH	14-3-3 protein eta	891.165	610.228	390.8	437.202
Q05086;Q05086-2;Q05086-3	Q05086;Q05086-2;Q05086-3	UBE3A_HUMAN	UBE3A	Ubiquitin-protein ligase E3A	1169.35	725.38	959.775	571.471
Q05519;Q05519-2	Q05519;Q05519-2	SRS11_HUMAN	SRSF11	Serine/arginine-rich splicing factor 11	2135.35	906.717	1412.53	939.197
Q05639	Q05639	EF1A2_HUMAN	EEF1A2	Elongation factor 1-alpha 2	57142.2	58292.1	57472.8	48829.9
Q05655;Q05655-2	Q05655;Q05655-2	KPCD_HUMAN	PRKCD	Protein kinase C delta type	1407.45	996.758	928.092	1887.67
Q06124;Q06124-1	Q06124;Q06124-1	PTN11_HUMAN	PTPN11	Tyrosine-protein phosphatase non-receptor type 11	2481.82	2589.6	2723.39	1994.12
Q06203	Q06203	PUR1_HUMAN	PPAT	Amidophosphoribosyltransferase	1264.79	1530.28	1341.16	1144.86
Q06210;Q06210-2	Q06210;Q06210-2	GFPT1_HUMAN	GFPT1	Glutamine--fructose-6-phosphate aminotransferase [isomerizing] 1	3636.87	3804.88	4038.72	3315.31
Q06323	Q06323	PSME1_HUMAN	PSME1	Proteasome activator complex subunit 1	334.47	464.975	205.234	213.043
Q06830	Q06830	PRDX1_HUMAN	PRDX1	Peroxiredoxin-1	33030.5	29972.9	25075.2	44451.6
Q07020	Q07020;Q07020-2	RL18_HUMAN	RPL18	Large ribosomal subunit protein eL18	6386.21	5432.08	5339.82	6837.3
Q07021	Q07021	C1QBP_HUMAN	C1QBP	Complement component 1 Q subcomponent-binding protein, mitochondrial	1181.8	1419.69	784.47	2714.09
Q07864	Q07864	DPOE1_HUMAN	POLE	DNA polymerase epsilon catalytic subunit A		237.862	334.243
Q07955;Q07955-2;Q07955-3	Q07955;Q07955-2;Q07955-3	SRSF1_HUMAN	SRSF1	Serine/arginine-rich splicing factor 1	2418.56	1628.23	1273.6	3074.58
Q08170	Q08170;Q13247;Q13247-3	SRSF4_HUMAN	SRSF4	Serine/arginine-rich splicing factor 4	5801.18	6692.83	4995.35	7432.05
Q08211	Q08211	DHX9_HUMAN	DHX9	ATP-dependent RNA helicase A	6493.75	6486.77	5084.48	5387.95
Q08752	Q08752	PPID_HUMAN	PPID	Peptidyl-prolyl cis-trans isomerase D		818.811
Q08945	Q08945	SSRP1_HUMAN	SSRP1	FACT complex subunit SSRP1	2259.51	1819.53	2268.64	2968.78
Q08J23	Q08J23;Q08J23-2;Q08J23-3	NSUN2_HUMAN	NSUN2	RNA cytosine C(5)-methyltransferase NSUN2	2210.29	1952.46	1689.2	2567.34
Q09028;Q09028-3	Q09028;Q09028-3	RBBP4_HUMAN	RBBP4	Histone-binding protein RBBP4	1804.5	1434.2	1382.37	994.757
Q09666	Q09666	AHNK_HUMAN	AHNAK	Neuroblast differentiation-associated protein AHNAK	1165.35	2224.62	1444.82	1061.62
Q0VDF9	Q0VDF9	HSP7E_HUMAN	HSPA14	Heat shock 70 kDa protein 14	876.692	1484.79	823.169	737.68
Q10567;Q10567-2;Q10567-3;Q10567-4	Q10567;Q10567-3;Q10567-2;Q10567-4	AP1B1_HUMAN	AP1B1	AP-1 complex subunit beta-1	1008.52	1194.85	1097.1	1132.25
Q10570	Q10570	CPSF1_HUMAN	CPSF1	Cleavage and polyadenylation specificity factor subunit 1	491.046	523.938	150.913
Q10713;Q10713-2	Q10713;Q10713-2	MPPA_HUMAN	PMPCA	Mitochondrial-processing peptidase subunit alpha	423.624	731.04	366.277	381.813
Q12768	Q12768	WASC5_HUMAN	WASHC5	WASH complex subunit 5	726.913	632.536	547.945	449.397
Q12774	Q12774;A5YM69	ARHG5_HUMAN	ARHGEF5	Rho guanine nucleotide exchange factor 5				2145.08
Q12789;Q12789-3	Q12789;Q12789-3	TF3C1_HUMAN	GTF3C1	General transcription factor 3C polypeptide 1	1371.82	1481.36	1677.36	986.457
Q12792;Q12792-4	Q12792;Q6IBS0;Q12792-3;Q12792-4	TWF1_HUMAN	TWF1	Twinfilin-1	704.862	323.473	1091.82	908.443
Q12906;Q12906-2;Q12906-3;Q12906-4;Q12906-5;Q12906-6;Q12906-7	Q12906;Q12906-2;Q12906-3;Q12906-4;Q12906-5;Q12906-6;Q12906-7	ILF3_HUMAN	ILF3	Interleukin enhancer-binding factor 3	1049.59	837.451	1114.93	1318.35
Q12923;Q12923-2;Q12923-3;Q12923-4	Q12923;Q12923-2;Q12923-3;Q12923-4	PTN13_HUMAN	PTPN13	Tyrosine-protein phosphatase non-receptor type 13				887.891
Q12931;Q12931-2	Q12931;Q12931-2	TRAP1_HUMAN	TRAP1	Heat shock protein 75 kDa, mitochondrial	7080.12	5813.95	5179.52	6645.6
Q12933;Q12933-2;Q12933-3;Q12933-4	Q12933;Q12933-2;Q12933-3;Q12933-4	TRAF2_HUMAN	TRAF2	TNF receptor-associated factor 2	1232.75	791.793	844.657	570.567
Q13011	Q13011	ECH1_HUMAN	ECH1	Delta(3,5)-Delta(2,4)-dienoyl-CoA isomerase, mitochondrial	5127.66	3800.29	3381.23	4861.2
Q13033;Q13033-2	Q13033;Q13033-2	STRN3_HUMAN	STRN3	Striatin-3	1473.02	1421.79	1868.46	1441.67
Q13045;Q13045-2;Q13045-3	Q13045;Q13045-2;Q13045-3	FLII_HUMAN	FLII	Protein flightless-1 homolog	434.711	519.342	692.475	489.497
Q13085;Q13085-2;Q13085-3;Q13085-4	O00763;Q13085;O00763-2;O00763-3;Q13085-2;Q13085-3;Q13085-4	ACACA_HUMAN	ACACA	Acetyl-CoA carboxylase 1	1783.06	2344.17	2317.18	2089.88
Q13107;Q13107-2	Q13107;Q13107-2;Q13107-3	UBP4_HUMAN	USP4	Ubiquitin carboxyl-terminal hydrolase 4	24736.8	26428.4	25410.3	1109.35
Q13144	Q13144	EI2BE_HUMAN	EIF2B5	Translation initiation factor eIF-2B subunit epsilon	1676.12	1404.62	1503.04	1073.86
Q13148	Q13148	TADBP_HUMAN	TARDBP	TAR DNA-binding protein 43	2351.78	1562.13	1941.91	1747.89
Q13151	Q13151	ROA0_HUMAN	HNRNPA0	Heterogeneous nuclear ribonucleoprotein A0	1253.94	858.749	1218.44	779.59
Q13155;Q13155-2	Q13155;Q13155-2	AIMP2_HUMAN	AIMP2	Aminoacyl tRNA synthase complex-interacting multifunctional protein 2	2517.63	1549.66	1648.3	1776.66
Q13162	Q13162	PRDX4_HUMAN	PRDX4	Peroxiredoxin-4	3536.65	4730.22	7405.86	3204.39
Q13200	Q13200;Q13200-2;Q13200-3	PSMD2_HUMAN	PSMD2	26S proteasome non-ATPase regulatory subunit 2	3699.79	3857.67	3655.84	3324.03
Q13228;Q13228-4	Q13228;Q13228-4	SBP1_HUMAN	SELENBP1	Methanethiol oxidase	9713.95	10816.8	11805.3	8055.23
Q13263;Q13263-2	Q13263;Q13263-2	TIF1B_HUMAN	TRIM28	Transcription intermediary factor 1-beta	1554.82	1990.41	1013.69	1707.03
Q13283;Q13283-2;Q9UN86;Q9UN86-2	Q13283;Q9UN86;Q13283-2;Q9UN86-2	G3BP1_HUMAN;G3BP2_HUMAN	G3BP1;G3BP2	Ras GTPase-activating protein-binding protein 1	1198.39	902.313	799.507	1622.55
Q13310;Q13310-2;Q13310-3	Q13310;Q13310-2;Q13310-3	PABP4_HUMAN	PABPC4	Polyadenylate-binding protein 4	904.96	847.137		624.804
Q13347	Q13347	EIF3I_HUMAN	EIF3I	Eukaryotic translation initiation factor 3 subunit I	3932.32	4335.31	4372.94	3252.2
Q13404;Q13404-1;Q13404-2;Q13404-7	Q13404;Q15819;Q13404-1;Q13404-2;Q13404-7;Q13404-8	UB2V1_HUMAN	UBE2V1	Ubiquitin-conjugating enzyme E2 variant 1	3457.47	3514.95	3360.82	4071.48
Q13409;Q13409-2;Q13409-3;Q13409-5;Q13409-6;Q13409-7	Q13409;Q13409-3;Q13409-2;Q13409-5;Q13409-6;Q13409-7	DC1I2_HUMAN	DYNC1I2	Cytoplasmic dynein 1 intermediate chain 2	839.291	1339.88	1183.28	697.278
Q13547;Q92769;Q92769-3	Q13547;Q92769;Q92769-3	HDAC1_HUMAN;HDAC2_HUMAN	HDAC1;HDAC2	Histone deacetylase 1	3491.94	3562.01	4176.63	3755.54
Q13616	Q13616	CUL1_HUMAN	CUL1	Cullin-1	2511	2472.94	2593.61	1932.48
Q13617;Q13617-2	Q13617;Q13617-2	CUL2_HUMAN	CUL2	Cullin-2	2264.74	2893.51	3222.87	1594.53
Q13618;Q13618-2	Q13618;Q13618-2;Q13618-3	CUL3_HUMAN	CUL3	Cullin-3	1159.99	1357.62	1116.23	1222.21
Q13619;Q13619-2	Q13619;Q13619-2	CUL4A_HUMAN	CUL4A	Cullin-4A		1054.83	980.24	406.27
Q13620;Q13620-1;Q13620-3	Q13620;Q13620-1;Q13620-3	CUL4B_HUMAN	CUL4B	Cullin-4B	1389.48	926.166	1239.55	1179.51
Q13643	Q13643	FHL3_HUMAN	FHL3	Four and a half LIM domains protein 3	1445	809.894		1271.17
Q13685	Q13685	AAMP_HUMAN	AAMP	Angio-associated migratory cell protein	581.723	709.441	494.279	781.077
Q13838;Q13838-2	Q13838;Q13838-2	DX39B_HUMAN	DDX39B	Spliceosome RNA helicase DDX39B	7365.53	6407.33	7880.28	9132.76
Q13907;Q13907-2	Q13907;Q13907-2	IDI1_HUMAN	IDI1	Isopentenyl-diphosphate Delta-isomerase 1	3756.37	3729.81	3776.57	3834.54
Q14103;Q14103-2;Q14103-3;Q14103-4	Q14103;Q14103-4;Q14103-2;Q14103-3	HNRPD_HUMAN	HNRNPD	Heterogeneous nuclear ribonucleoprotein D0	1664.56	1919.9	1403.42	1817.02
Q14139;Q14139-2	Q14139;Q14139-2	UBE4A_HUMAN	UBE4A	Ubiquitin conjugation factor E4 A	5341.17	4189.4	2895.16	54096.3
Q14152	Q14152;Q14152-2	EIF3A_HUMAN	EIF3A	Eukaryotic translation initiation factor 3 subunit A	2085.5	2121.05	1702.07	2274.95
Q14166	Q14166	TTL12_HUMAN	TTLL12	Tubulin--tyrosine ligase-like protein 12	2355.79	2299.42	2630.7	3884.05
Q14168;Q14168-2;Q14168-3;Q14168-4;Q14168-5;Q14168-6;Q9NZW5	Q14168;Q9NZW5;Q14168-4;Q14168-2;Q14168-3;Q14168-5;Q14168-6	MPP2_HUMAN;PALS2_HUMAN	MPP2;PALS2	MAGUK p55 subfamily member 2	407.097	798.494	686.325
Q14204	Q14204	DYHC1_HUMAN	DYNC1H1	Cytoplasmic dynein 1 heavy chain 1	25341.5	35639.9	46086.5	15262
Q14240;Q14240-2	Q14240;Q14240-2	IF4A2_HUMAN	EIF4A2	Eukaryotic initiation factor 4A-II	2519.93	2207.81	1125.16	911.858
Q14258	Q14258	TRI25_HUMAN	TRIM25	E3 ubiquitin/ISG15 ligase TRIM25	2493.56	2223.24	2883.85	2059.3
Q14498;Q14498-2;Q14498-3	Q14498;Q14498-3;Q14498-2	RBM39_HUMAN	RBM39	RNA-binding protein 39	678.367	879.607	671.403	815.652
Q14566	Q14566	MCM6_HUMAN	MCM6	DNA replication licensing factor MCM6	4084.63	4276.55	4051.9	5244.66
Q14694;Q14694-2;Q14694-3	Q14694;Q14694-2;Q14694-3	UBP10_HUMAN	USP10	Ubiquitin carboxyl-terminal hydrolase 10	30951.9	31916.8	33001.8	1442.42
Q14697;Q14697-2	Q14697;Q14697-2	GANAB_HUMAN	GANAB	Neutral alpha-glucosidase AB	6905.6	7584.91	6896.54	6168.82
Q147X3;Q147X3-2	Q147X3;Q147X3-2	NAA30_HUMAN	NAA30	N-alpha-acetyltransferase 30	405.845	307.454	432.289	405.118
Q14839;Q14839-2	Q12873;Q14839;Q8TDI0;Q12873-2;Q12873-3;Q14839-2	CHD4_HUMAN	CHD4	Chromodomain-helicase-DNA-binding protein 4	1496.6	1477.27	1648.48	1500.61
Q14914;Q14914-2	Q14914;Q14914-2	PTGR1_HUMAN	PTGR1	Prostaglandin reductase 1	758.536	814.233	496.689	894.654
Q14974;Q14974-2	Q14974;Q14974-2	IMB1_HUMAN	KPNB1	Importin subunit beta-1	607.37	332.915	432.083	544.789
Q15019;Q15019-2;Q15019-3	Q15019;Q15019-3;Q15019-2	SEPT2_HUMAN	SEPTIN2	Septin-2	4610.57	4109.08	3796.9	3882.68
Q15020;Q15020-4	Q15020;Q15020-4	SART3_HUMAN	SART3	Squamous cell carcinoma antigen recognized by T-cells 3	2795.96	2701.02	2979.27	2893.78
Q15029;Q15029-2;Q15029-3	Q15029;Q15029-2;Q15029-3	U5S1_HUMAN	EFTUD2	116 kDa U5 small nuclear ribonucleoprotein component	1380.3	1557.9	1837.19	1506.8
Q15046;Q15046-2	Q15046;Q15046-2	SYK_HUMAN	KARS1	Lysine--tRNA ligase	17760.2	16155.8	13470.2	20818.2
Q15102	Q15102	PA1B3_HUMAN	PAFAH1B3	Platelet-activating factor acetylhydrolase IB subunit alpha1	6400.57	6306.19	4452.7	12805.1
Q15139;Q9BZL6;Q9BZL6-2;Q9BZL6-3	Q15139;Q9BZL6;Q9BZL6-2;Q9BZL6-3	KPCD1_HUMAN;KPCD2_HUMAN	PRKD1;PRKD2	Serine/threonine-protein kinase D1	116.532	122.061
Q15149;Q15149-2;Q15149-3;Q15149-4;Q15149-5;Q15149-6;Q15149-7;Q15149-8;Q15149-9	Q15149;Q15149-2;Q15149-3;Q15149-4;Q15149-5;Q15149-6;Q15149-7;Q15149-8;Q15149-9	PLEC_HUMAN	PLEC	Plectin	2205.78	1877.29	2651.57	1735.73
Q15181	Q15181	IPYR_HUMAN	PPA1	Inorganic pyrophosphatase	1662.21	1044.38	775.509	2024.14
Q15185;Q15185-4	Q15185;Q15185-3;Q15185-4	TEBP_HUMAN	PTGES3	Prostaglandin E synthase 3	5509.1	4587.4	3765.61	4678.9
Q15233;Q15233-2	Q15233;Q15233-2	NONO_HUMAN	NONO	Non-POU domain-containing octamer-binding protein	1277.75	1037.53	1398.35	1081.62
Q15291;Q15291-2	Q15291;Q15291-2	RBBP5_HUMAN	RBBP5	Retinoblastoma-binding protein 5	1819.21	1829.66	1774.79	1078.86
Q15365	Q15365	PCBP1_HUMAN	PCBP1	Poly(rC)-binding protein 1	7762.87	5957.61	5032.4	5223.9
Q15366;Q15366-2;Q15366-3;Q15366-6	Q15366;Q15366-2;Q15366-3;Q15366-6	PCBP2_HUMAN	PCBP2	Poly(rC)-binding protein 2	11982.2	9852.61	7294.24	9946.94
Q15382	Q15382	RHEB_HUMAN	RHEB	GTP-binding protein Rheb	2481.55	2484.04	2367.34	1959.45
Q15386	Q15386	UBE3C_HUMAN	UBE3C	Ubiquitin-protein ligase E3C	3214.92	2930.02	3279.58	1059.97
Q15393	Q15393	SF3B3_HUMAN	SF3B3	Splicing factor 3B subunit 3	4481.02	3444.72	3933.27	4456.95
Q15436	Q15436	SC23A_HUMAN	SEC23A	Protein transport protein Sec23A	2093.6	1853.87	2101.31	2113.81
Q15437	Q15437	SC23B_HUMAN	SEC23B	Protein transport protein Sec23B	1909.18	1639.98	2010.09	1764.42
Q15477	Q15477	SKI2_HUMAN	SKIC2	Superkiller complex protein 2	398.879	276.074	565.371	570.455
Q15645	Q15645	PCH2_HUMAN	TRIP13	Pachytene checkpoint protein 2 homolog	1573.3	1623.02	1017.78	1608.67
Q15751	Q15751	HERC1_HUMAN	HERC1	Probable E3 ubiquitin-protein ligase HERC1	3253.91	4294.83	4300.15	2323.32
Q15758	Q15758	AAAT_HUMAN	SLC1A5	Neutral amino acid transporter B(0)	429.613	463.246	797.787	676.118
Q15773	Q15773	MLF2_HUMAN	MLF2	Myeloid leukemia factor 2	979.559	807.766	611	1101.66
Q15843	Q15843	NEDD8_HUMAN	NEDD8	NEDD8	763.609	477.85	683.51	676.835
Q15910;Q15910-2;Q15910-3;Q15910-4;Q15910-5	Q15910;Q15910-2;Q15910-3;Q15910-4;Q15910-5	EZH2_HUMAN	EZH2	Histone-lysine N-methyltransferase EZH2		881.952
Q16181;Q16181-2	Q16181;Q16181-2	SEPT7_HUMAN	SEPTIN7	Septin-7	1517.75	680.3	1165.65	1318.04
Q16186	Q16186	ADRM1_HUMAN	ADRM1	Proteasomal ubiquitin receptor ADRM1	1528.54	911.312	1041.52	762.283
Q16342;Q16342-3	Q16342;Q16342-3	PDCD2_HUMAN	PDCD2	Programmed cell death protein 2			969.235	4926.6
Q16512;Q16512-2	Q16512;Q16512-2	PKN1_HUMAN	PKN1	Serine/threonine-protein kinase N1	789.511	686.791	338.452	658.633
Q16531	Q16531	DDB1_HUMAN	DDB1	DNA damage-binding protein 1	4596.61	4146.37	4049.44	4869.57
Q16555;Q16555-2	Q14194;Q16555;Q14194-2;Q16555-2	DPYL2_HUMAN	DPYSL2	Dihydropyrimidinase-related protein 2	237.612	534.73	357.709	565.743
Q16576	Q16576;Q16576-2	RBBP7_HUMAN	RBBP7	Histone-binding protein RBBP7	6449.35	5868.46	6316.76	6793.07
Q16658	Q16658	FSCN1_HUMAN	FSCN1	Fascin	2155.15	2190.06	2308.86	2176.29
Q16719	Q16719;Q16719-2	KYNU_HUMAN	KYNU	Kynureninase	6700.43	7417.32	7885.56	5692.2
Q16836;Q16836-2;Q16836-3	Q16836;Q16836-2;Q16836-3	HCDH_HUMAN	HADH	Hydroxyacyl-coenzyme A dehydrogenase, mitochondrial	2774.06	2152.01	2669.06	2405.77
Q16851;Q16851-2	Q16851;Q16851-2	UGPA_HUMAN	UGP2	UTP--glucose-1-phosphate uridylyltransferase	855.708	1422.99	1478.25	1010.62
Q16881;Q16881-2;Q16881-3;Q16881-4;Q16881-5;Q16881-6	Q16881;Q9NNW7;Q16881-4;Q16881-5;Q16881-2;Q16881-3;Q16881-6;Q16881-7;Q9NNW7-2	TRXR1_HUMAN	TXNRD1	Thioredoxin reductase 1, cytoplasmic	9177.59	8602.64	7327.32	8646.51
Q1KMD3	Q1KMD3	HNRL2_HUMAN	HNRNPUL2	Heterogeneous nuclear ribonucleoprotein U-like protein 2	2110.36	1519.99	2495.9	2481.59
Q2M389	Q2M389	WASC4_HUMAN	WASHC4	WASH complex subunit 4	740.275	799.403	617.938	619.26
Q2NL82	Q2NL82	TSR1_HUMAN	TSR1	Pre-rRNA-processing protein TSR1 homolog	4273.44	4651.85	4017.98	3712.52
Q2TAY7	Q2TAY7	SMU1_HUMAN	SMU1	WD40 repeat-containing protein SMU1	2257.79	1630.52	2302.06	1435.54
Q38SD2	Q38SD2	LRRK1_HUMAN	LRRK1	Leucine-rich repeat serine/threonine-protein kinase 1	904.205	1184.41	945.148	834.985
Q3MHD2;Q3MHD2-2	Q3MHD2;Q3MHD2-2	LSM12_HUMAN	LSM12	Protein LSM12	684.762	1069.16	863.123	706.729
Q3YEC7;Q3YEC7-2	Q3YEC7;Q3YEC7-2	RABL6_HUMAN	RABL6	Rab-like protein 6	3414	3425.29	3639.93	3106.42
Q4G0N4;Q4G0N4-2;Q4G0N4-3	Q4G0N4;Q4G0N4-2;Q4G0N4-3	NAKD2_HUMAN	NADK2	NAD kinase 2, mitochondrial	682.905	715.333	276.033
Q4G176	Q4G176	ACSF3_HUMAN	ACSF3	Malonate--CoA ligase ACSF3, mitochondrial	1296.55	1328.84	1234.89	1129.21
Q4V339;Q5JTY5;Q5JTY5-2;Q5RIA9;Q5RIA9-3;Q8IUF1;Q9BRT8;Q9BRT8-3	Q5JTY5;Q9BRT8;Q5RIA9;Q4V339;Q8IUF1;Q5JTY5-2;Q5RIA9-3;Q9BRT8-3;Q9BRT8-4	ZNG1A_HUMAN;ZNG1B_HUMAN;ZNG1C_HUMAN;ZNG1E_HUMAN;ZNG1F_HUMAN	ZNG1A;ZNG1B;ZNG1C;ZNG1E;ZNG1F	Zinc-regulated GTPase metalloprotein activator 1F	600.163	392.863	611.193	611.134
Q4ZG55;Q4ZG55-4	Q4ZG55;Q4ZG55-4	GREB1_HUMAN	GREB1	Protein GREB1	1228.81	1239.65	1134.03	810.596
Q504Q3;Q504Q3-2;Q504Q3-3	Q504Q3;Q504Q3-2;Q504Q3-3	PAN2_HUMAN	PAN2	PAN2-PAN3 deadenylation complex catalytic subunit PAN2	360.599		375.562
Q53H96;Q53H96-2	Q53H96;Q53H96-2	P5CR3_HUMAN	PYCR3	Pyrroline-5-carboxylate reductase 3	4375.69	2723.77	4419.9	3191.48
Q53HC9	Q53HC9	EIPR1_HUMAN	EIPR1	EARP and GARP complex-interacting protein 1	524.368	935.24	268.013
Q562R1	P60709;P62736;P63261;P63267;P68032;P68133;Q562R1;P63267-2	ACTBL_HUMAN	ACTBL2	Beta-actin-like protein 2	1239.74	967.047	1094.05	852.852
Q58FF6	Q58FF6	H90B4_HUMAN	HSP90AB4P	Putative heat shock protein HSP 90-beta 4	749.657	675.291	845.423	648.94
Q5JSH3;Q5JSH3-2;Q5JSH3-4	Q5JSH3;Q5JSH3-2;Q5JSH3-4	WDR44_HUMAN	WDR44	WD repeat-containing protein 44	452.777	404.999	418.829
Q5JTH9;Q5JTH9-2;Q5JTH9-3	Q5JTH9;Q5JTH9-2;Q5JTH9-3	RRP12_HUMAN	RRP12	RRP12-like protein	8963.7	8591.35	7562.25	6118.8
Q5JVF3;Q5JVF3-2;Q5JVF3-3;Q5JVF3-4	Q5JVF3;Q5JVF3-2;Q5JVF3-3;Q5JVF3-4	PCID2_HUMAN	PCID2	PCI domain-containing protein 2	676.079	278.075	507.712	442.421
Q5SRE5;Q5SRE5-2	Q5SRE5;Q5SRE5-2	NU188_HUMAN	NUP188	Nucleoporin NUP188	330.859	359.736	462.962	219.615
Q5SRH9;Q5SRH9-4;Q5SRH9-5;Q5SRH9-6	Q5SRH9;Q5SRH9-2;Q5SRH9-4;Q5SRH9-5;Q5SRH9-6	TT39A_HUMAN	TTC39A	Tetratricopeptide repeat protein 39A	906.641	855.294	1001.86	583.983
Q5T4S7;Q5T4S7-2;Q5T4S7-3;Q5T4S7-4	Q5T4S7;Q5T4S7-2;Q5T4S7-3;Q5T4S7-4;Q5T4S7-5	UBR4_HUMAN	UBR4	E3 ubiquitin-protein ligase UBR4	1488.56	1897.98	2143.38	1038.04
Q5T6V5	Q5T6V5	QNG1_HUMAN	QNG1	Queuosine 5'-phosphate N-glycosylase/hydrolase	1898.45	2218.69	1685.65	2124.68
Q5TA45;Q5TA45-2;Q5TA45-3;Q5TA45-4;Q5TA45-5	Q5TA45;Q5TA45-2;Q5TA45-3;Q5TA45-4;Q5TA45-5	INT11_HUMAN	INTS11	Integrator complex subunit 11	697.633	655.981	743.778	721.387
Q5TAQ9	Q5TAQ9;Q5TAQ9-2	DCAF8_HUMAN	DCAF8	DDB1- and CUL4-associated factor 8	1968.44	1516.46	1528.21	1506.19
Q5TFE4	Q5TFE4	NT5D1_HUMAN	NT5DC1	5'-nucleotidase domain-containing protein 1	1052.75	960.277	604.089	854.557
Q5VWZ2;Q5VWZ2-2	Q5VWZ2;Q5VWZ2-2	LYPL1_HUMAN	LYPLAL1	Lysophospholipase-like protein 1	3854.76	2147.63	2396.84	3202.2
Q5VYK3	Q5VYK3	ECM29_HUMAN	ECPAS	Proteasome adapter and scaffold protein ECM29	827.107	955.115	850.873	1203.46
Q63HN8;Q63HN8-4	Q63HN8;Q63HN8-4	RN213_HUMAN	RNF213	E3 ubiquitin-protein ligase RNF213	3042.74	4317.13	5280.65	2084.56
Q69YN2	Q69YN2	C19L1_HUMAN	CWF19L1	CWF19-like protein 1	781.865	1276.57	928.627	651.092
Q6GMV2	Q6GMV2	SMYD5_HUMAN	SMYD5	Histone-lysine N-trimethyltransferase SMYD5	1151.86	618.733	292.239	904.471
Q6GQQ9;Q6GQQ9-2	Q6GQQ9;Q6GQQ9-2	OTU7B_HUMAN	OTUD7B	OTU domain-containing protein 7B	9331.27	10374.5	10071.1	16828.4
Q6IA69;Q6IA69-2	Q6IA69;Q6IA69-2	NADE_HUMAN	NADSYN1	Glutamine-dependent NAD(+) synthetase	1215.09	1552.23	1572.52	741.204
Q6L8Q7;Q6L8Q7-2	Q6L8Q7;Q6L8Q7-2	PDE12_HUMAN	PDE12	2',5'-phosphodiesterase 12	4028.99	3655.68	3811.31	10509.5
Q6NS38	Q6NS38	ALKB2_HUMAN	ALKBH2	DNA oxidative demethylase ALKBH2	966.671	1001.83	1386.86
Q6NVY1;Q6NVY1-2	Q6NVY1;Q6NVY1-2	HIBCH_HUMAN	HIBCH	3-hydroxyisobutyryl-CoA hydrolase, mitochondrial	700.698	555.989	566.943	878.84
Q6NXG1;Q6NXG1-2;Q6NXG1-3;Q6NXG1-4;Q6NXG1-5	Q6NXG1;Q6NXG1-3;Q6NXG1-2;Q6NXG1-4;Q6NXG1-5	ESRP1_HUMAN	ESRP1	Epithelial splicing regulatory protein 1	827.437	689.974	950.437	780.692
Q6P158	Q6P158	DHX57_HUMAN	DHX57	Putative ATP-dependent RNA helicase DHX57	1545.03	1332.32	1498.65	836.454
Q6P1J9	Q6P1J9	CDC73_HUMAN	CDC73	Parafibromin	2121.87	1039.35	1499.4	1723.21
Q6P1X5	Q6P1X5	TAF2_HUMAN	TAF2	Transcription initiation factor TFIID subunit 2	331.884	413.401	158.874
Q6P2E9	Q6P2E9;Q6P2E9-2	EDC4_HUMAN	EDC4	Enhancer of mRNA-decapping protein 4	1723.72	2438.79	2417.08	1825.1
Q6P2Q9	Q6P2Q9	PRP8_HUMAN	PRPF8	Pre-mRNA-processing-splicing factor 8	5568.54	5783.74	7553.87	5661.17
Q6P3X3	Q6P3X3	TTC27_HUMAN	TTC27	Tetratricopeptide repeat protein 27	1490.05	1060.59	792.925	864.676
Q6P587;Q6P587-2;Q6P587-3	Q6P587;Q6P587-2;Q6P587-3	FAHD1_HUMAN	FAHD1	Acylpyruvase FAHD1, mitochondrial	515.515	647.853	293.163	311.414
Q6P9B6	Q6P9B6	MEAK7_HUMAN	MEAK7	MTOR-associated protein MEAK7	748.831	710.759	555.129	869.972
Q6PI48	Q6PI48	SYDM_HUMAN	DARS2	Aspartate--tRNA ligase, mitochondrial	5481.86	5588.44	5845.3	4283.34
Q6PJI9	Q6PJI9;Q6PJI9-3;Q6PJI9-4	WDR59_HUMAN	WDR59	GATOR complex protein WDR59	2309.2	1779.42	2142.35	2622.65
Q6Q6R5-3	Q6Q6R5-3	CRIP3_HUMAN	CRIP3	Isoform 3 of Cysteine-rich protein 3	4797.21	5463.03	5002.18	8903.13
Q6R2W3	Q6R2W3	SCND3_HUMAN	SCAND3	SCAN domain-containing protein 3	3527.25	1699.17	1914.86	7491.32
Q6UB35	Q6UB35	C1TM_HUMAN	MTHFD1L	Monofunctional C1-tetrahydrofolate synthase, mitochondrial	848.037	688.877	611.654	1112.87
Q6UWH6	Q6UWH6	TX261_HUMAN	TEX261	Protein TEX261			144.983
Q6YP21;Q6YP21-3	Q6YP21;Q6YP21-3	KAT3_HUMAN	KYAT3	Kynurenine--oxoglutarate transaminase 3	725.096	532.545		336.831
Q6ZMW3;Q6ZMW3-2	Q6ZMW3;Q6ZMW3-2	EMAL6_HUMAN	EML6	Echinoderm microtubule-associated protein-like 6	4175.08	4037.91	4458.71	4381.23
Q6ZNJ1;Q6ZNJ1-2;Q6ZNJ1-3	Q6ZNJ1;Q6ZNJ1-2;Q6ZNJ1-3	NBEL2_HUMAN	NBEAL2	Neurobeachin-like protein 2	669.807	744.276	878.818	561.557
Q70CQ2;Q70CQ2-2	Q70CQ2;Q70CQ2-2;Q70CQ2-3	UBP34_HUMAN	USP34	Ubiquitin carboxyl-terminal hydrolase 34	6285.93	6338.66	6621.16	962.54
Q70EL2;Q70EL2-2	Q70EL2;Q70EL2-2	UBP45_HUMAN	USP45	Ubiquitin carboxyl-terminal hydrolase 45	507.323	448.567	660.768
Q70EL4;Q70EL4-4	Q70EL4;Q70EL4-4	UBP43_HUMAN	USP43	Ubiquitin carboxyl-terminal hydrolase 43	2118.17	1901.64	1658.49
Q71U36;Q71U36-2	P0DPH7;P0DPH8;Q6PEY2;Q71U36;Q9BQE3;Q9NY65;P0DPH7-2;Q71U36-2;Q9NY65-2	TBA1A_HUMAN	TUBA1A	Tubulin alpha-1A chain	5936.32	4603.11	3805.61	6759.2
Q71UM5	Q71UM5	RS27L_HUMAN	RPS27L	Ribosomal protein eS27-like	1800.58	1936.43	1867.5	1257.28
Q7KZF4	Q7KZF4	SND1_HUMAN	SND1	Staphylococcal nuclease domain-containing protein 1	2740	3136.29	3103.32	2557.8
Q7L014	Q7L014	DDX46_HUMAN	DDX46	Probable ATP-dependent RNA helicase DDX46	3369.27	2415.83	2822.52	3601.31
Q7L2E3;Q7L2E3-2;Q7L2E3-3	Q7L2E3;Q7L2E3-2;Q7L2E3-3	DHX30_HUMAN	DHX30	ATP-dependent RNA helicase DHX30	453.469	553.191	371.451	606.634
Q7L2H7	Q7L2H7	EIF3M_HUMAN	EIF3M	Eukaryotic translation initiation factor 3 subunit M	977.068	1412.26	468.559	924.815
Q7L2J0	Q7L2J0;Q7L2J0-2	MEPCE_HUMAN	MEPCE	7SK snRNA methylphosphate capping enzyme	1866.44	1367.1	1740.59	2691.69
Q7L576	Q7L576;Q7L576-2;Q7L576-3	CYFP1_HUMAN	CYFIP1	Cytoplasmic FMR1-interacting protein 1	1812.16	1782.92	1708.37	2407.49
Q7L5D6;Q7L5D6-2	Q7L5D6;Q7L5D6-2	GET4_HUMAN	GET4	Golgi to ER traffic protein 4 homolog	1498.8	1725.31	1149.45	899.743
Q7RTS9	Q7RTS9	DYM_HUMAN	DYM	Dymeclin	946.394	465.859	1057.24	3070.62
Q7Z2T5	Q7Z2T5	TRM1L_HUMAN	TRMT1L	TRMT1-like protein	8509.52	4140.57	6491.56	5157.45
Q7Z2W9;Q7Z2W9-2	Q7Z2W9;Q7Z2W9-2	RM21_HUMAN	MRPL21	Large ribosomal subunit protein bL21m	595.318	813.76	651.203	965.503
Q7Z2Z2;Q7Z2Z2-2	Q7Z2Z2;Q7Z2Z2-2	EFL1_HUMAN	EFL1	Elongation factor-like GTPase 1	475.643	360.595
Q7Z406-4	Q7Z406;Q7Z406-2;Q7Z406-4;Q7Z406-5;Q7Z406-6	MYH14_HUMAN	MYH14	Isoform 4 of Myosin-14	1892.57	1897.24	1981.79	2945.11
Q7Z478	Q7Z478	DHX29_HUMAN	DHX29	ATP-dependent RNA helicase DHX29	361.107	628.008	896.692	566.667
Q7Z4W1	Q7Z4W1	DCXR_HUMAN	DCXR	L-xylulose reductase	2597.85	2469.6	1779.04	2297.97
Q7Z6Z7;Q7Z6Z7-2;Q7Z6Z7-3	Q7Z6Z7;Q7Z6Z7-2;Q7Z6Z7-3	HUWE1_HUMAN	HUWE1	E3 ubiquitin-protein ligase HUWE1	14047.7	15810	16645.3	2603.27
Q7Z739	Q7Z739;Q9BYJ9	YTHD3_HUMAN	YTHDF3	YTH domain-containing family protein 3	1079.71	691.875	955.509	994.573
Q86TI2;Q86TI2-2;Q86TI2-4	Q86TI2;Q86TI2-2;Q86TI2-4	DPP9_HUMAN	DPP9	Dipeptidyl peptidase 9	1420.71	993.358	1207.35	772.991
Q86TU7	Q86TU7	SETD3_HUMAN	SETD3	Actin-histidine N-methyltransferase	1263.85	1408.25	1312.14	1473.05
Q86UV5	Q86UV5;Q86UV5-2;Q86UV5-3;Q86UV5-4;Q86UV5-7;Q86UV5-8	UBP48_HUMAN	USP48	Ubiquitin carboxyl-terminal hydrolase 48	6227.49	6415.07	6290.44	1379.46
Q86VP6;Q86VP6-2	Q86VP6;Q86VP6-2	CAND1_HUMAN	CAND1	Cullin-associated NEDD8-dissociated protein 1	635.759	987.715	425.378	568.71
Q86W56;Q86W56-2;Q86W56-3;Q86W56-4;Q86W56-5	Q86W56;Q86W56-2;Q86W56-3;Q86W56-4;Q86W56-5	PARG_HUMAN	PARG	Poly(ADP-ribose) glycohydrolase	392.346	386.142
Q86WB0;Q86WB0-2;Q86WB0-3	Q86WB0;Q86WB0-2;Q86WB0-3	ZC3C1_HUMAN	ZC3HC1	Zinc finger C3HC-type protein 1	1799.57	1416.1	870.4	839.734
Q86WR0;Q86WR0-2	Q86WR0;Q86WR0-2	CCD25_HUMAN	CCDC25	Coiled-coil domain-containing protein 25	361.154	627.87	190.456	516.134
Q86X24;Q86X24-2	Q86X24;Q86X24-2	HORM1_HUMAN	HORMAD1	HORMA domain-containing protein 1			156.665
Q86X55;Q86X55-1	Q86X55;Q86X55-1;Q86X55-2	CARM1_HUMAN	CARM1	Histone-arginine methyltransferase CARM1	1585.51	2371.38	2297.46	1536.29
Q86XI2;Q86XI2-2	Q86XI2;Q86XI2-2	CNDG2_HUMAN	NCAPG2	Condensin-2 complex subunit G2	333.395	315.354	340.174	359.302
Q86XR7-2;Q9Y3B3;Q9Y3B3-2	Q9Y3B3;Q86XR7-2;Q9Y3B3-2	TCAM2_HUMAN;TMED7_HUMAN	TICAM2;TMED7	Isoform 2 of TIR domain-containing adapter molecule 2	810.31	718.165	638.114	555.657
Q8IWV8;Q8IWV8-4	Q8IWV8;Q8IWV8-2;Q8IWV8-4	UBR2_HUMAN	UBR2	E3 ubiquitin-protein ligase UBR2	784.425	639.872	683.196	432.263
Q8IX18;Q8IX18-2;Q8IX18-3;Q8IX18-4	Q8IX18;Q8IX18-2;Q8IX18-3;Q8IX18-4	DHX40_HUMAN	DHX40	Probable ATP-dependent RNA helicase DHX40	845.153	1281.43	798.232	919.024
Q8IXB1	Q8IXB1;Q8IXB1-2	DJC10_HUMAN	DNAJC10	DnaJ homolog subfamily C member 10	553.399	457.998	159.293	421.488
Q8IYB8	Q8IYB8	SUV3_HUMAN	SUPV3L1	ATP-dependent RNA helicase SUPV3L1, mitochondrial	133.978	431.228	297.404
Q8IYD1	Q8IYD1	ERF3B_HUMAN	GSPT2	Eukaryotic peptide chain release factor GTP-binding subunit ERF3B	245.498	371.933	786.389	592.222
Q8IYQ7	Q8IYQ7	THNS1_HUMAN	THNSL1	Threonine synthase-like 1	557.831
Q8IZ83;Q8IZ83-3	Q8IZ83;Q8IZ83-2;Q8IZ83-3	A16A1_HUMAN	ALDH16A1	Aldehyde dehydrogenase family 16 member A1	873.722	767.083	776.823	1494.73
Q8IZH2;Q8IZH2-2	Q8IZH2;Q8IZH2-2	XRN1_HUMAN	XRN1	5'-3' exoribonuclease 1	481.919	427.318	568.365	281.405
Q8IZT6	Q8IZT6	ASPM_HUMAN	ASPM	Abnormal spindle-like microcephaly-associated protein	196.102	291.103	452.289	293.672
Q8N0W3	Q8N0W3;Q8N0W3-2	FCSK_HUMAN	FCSK	L-fucose kinase	1823.73	1480.89	1759.93	6439.35
Q8N122;Q8N122-3	Q8N122;Q8N122-3	RPTOR_HUMAN	RPTOR	Regulatory-associated protein of mTOR	365.721	355.172	347.799
Q8N163;Q8N163-2	Q8N163;Q8N163-2	CCAR2_HUMAN	CCAR2	Cell cycle and apoptosis regulator protein 2	2610.36	2215.65	1733.34	2305.83
Q8N1F7;Q8N1F7-2	Q8N1F7;Q8N1F7-2	NUP93_HUMAN	NUP93	Nuclear pore complex protein Nup93	702.435	331.051	588.746
Q8N1G2	Q8N1G2	CMTR1_HUMAN	CMTR1	Cap-specific mRNA (nucleoside-2'-O-)-methyltransferase 1	2155.22	2204.24	2069.98	1857.15
Q8N3C0	Q8N3C0	ASCC3_HUMAN	ASCC3	Activating signal cointegrator 1 complex subunit 3	1715.91	1798.23	1943.99	1970.76
Q8N3D4	Q8N3D4	EH1L1_HUMAN	EHBP1L1	EH domain-binding protein 1-like protein 1	2019.18	699.436	279.843	3163.58
Q8N3P4;Q8N3P4-2;Q8N3P4-3	Q8N3P4;Q8N3P4-2;Q8N3P4-3	VPS8_HUMAN	VPS8	Vacuolar protein sorting-associated protein 8 homolog	1319.87	827.62	1069.62	963.869
Q8N465;Q8N465-2;Q8N465-3	Q8N465;Q8N465-2;Q8N465-3	D2HDH_HUMAN	D2HGDH	D-2-hydroxyglutarate dehydrogenase, mitochondrial	681.486	772.268	1076.83
Q8N543	Q8N543;Q8N543-2	OGFD1_HUMAN	OGFOD1	Prolyl 3-hydroxylase OGFOD1	868.151	965.232	1119.54	1107.51
Q8N684;Q8N684-2;Q8N684-3	Q8N684;Q8N684-3;Q8N684-2	CPSF7_HUMAN	CPSF7	Cleavage and polyadenylation specificity factor subunit 7	373.974	421.087		163.667
Q8N6M0	Q8N6M0;Q8N6M0-2	OTU6B_HUMAN	OTUD6B	Deubiquitinase OTUD6B	3214.49	4179.75	3728.71
Q8N8N7;Q8N8N7-2	Q8N8N7;Q8N8N7-2	PTGR2_HUMAN	PTGR2	Prostaglandin reductase 2	1331.21	1836.98	1554.19	971.965
Q8NB14	Q8NB14;Q8NB14-2	UBP38_HUMAN	USP38	Ubiquitin carboxyl-terminal hydrolase 38	3968.71	3634.03	3819.38
Q8NBF2;Q8NBF2-2	Q8NBF2;Q8NBF2-2	NHLC2_HUMAN	NHLRC2	NHL repeat-containing protein 2	675.412	998.905	895.087	747.236
Q8NBJ5	Q8NBJ5	GT251_HUMAN	COLGALT1	Procollagen galactosyltransferase 1	1256.56	1408.77	1207.06	1399.67
Q8NCN5	Q8NCN5	PDPR_HUMAN	PDPR	Pyruvate dehydrogenase phosphatase regulatory subunit, mitochondrial	1010.38	623.539	868.361	913.341
Q8NDH3;Q8NDH3-4;Q8NDH3-5	Q8NDH3;Q8NDH3-5;Q8NDH3-4	PEPL1_HUMAN	NPEPL1	Probable aminopeptidase NPEPL1	619.961	291.342	610.323	350.279
Q8NE71;Q8NE71-2	Q8NE71;Q8NE71-2	ABCF1_HUMAN	ABCF1	ATP-binding cassette sub-family F member 1	2331.52	2564.13	2511.69	2039.07
Q8NEB9	Q8NEB9	PK3C3_HUMAN	PIK3C3	Phosphatidylinositol 3-kinase catalytic subunit type 3	183.656	254.815		152.54
Q8NEZ5	Q8NEZ5;Q8NEZ5-2;Q8NEZ5-3	FBX22_HUMAN	FBXO22	F-box only protein 22	2713.83	2866.04	2156.44	2345.9
Q8NFA0	Q8NFA0	UBP32_HUMAN	USP32	Ubiquitin carboxyl-terminal hydrolase 32	43587.1	43714.7	43164.4	4967.1
Q8NFF5;Q8NFF5-2;Q8NFF5-3	Q8NFF5;Q8NFF5-2;Q8NFF5-3	FAD1_HUMAN	FLAD1	FAD synthase	326.804	259.295
Q8NFH3	Q8NFH3	NUP43_HUMAN	NUP43	Nucleoporin Nup43		443.561	453.137	452.318
Q8NFH4	Q8NFH4	NUP37_HUMAN	NUP37	Nucleoporin Nup37		255.259	391.352	1062.51
Q8NHQ9	Q8NHQ9	DDX55_HUMAN	DDX55	ATP-dependent RNA helicase DDX55	207.896		148.46
Q8NI27	Q8NI27	THOC2_HUMAN	THOC2	THO complex subunit 2		480.412	347.015
Q8TAT6;Q8TAT6-2	Q8TAT6;Q8TAT6-2	NPL4_HUMAN	NPLOC4	Nuclear protein localization protein 4 homolog	294.656	377.158	568.442	830.298
Q8TCS8	Q8TCS8	PNPT1_HUMAN	PNPT1	Polyribonucleotide nucleotidyltransferase 1, mitochondrial	2725.26	3196.56	3278.21	2109.55
Q8TCU6	Q8TCU6;Q8TCU6-3	PREX1_HUMAN	PREX1	Phosphatidylinositol 3,4,5-trisphosphate-dependent Rac exchanger 1 protein	1038.58	1072.3	818.886	727.722
Q8TCY9;Q8TCY9-2;Q8TCY9-3;Q8TCY9-4	Q8TCY9;Q8TCY9-2;Q8TCY9-3;Q8TCY9-4	URGCP_HUMAN	URGCP	Up-regulator of cell proliferation	426.354	452.953	541.242
Q8TDN6	Q8TDN6	BRX1_HUMAN	BRIX1	Ribosome biogenesis protein BRX1 homolog	859.653	664.995	832.701	597.892
Q8TEB1;Q8TEB1-2;Q8TEB1-3	Q8TEB1;Q8TEB1-2;Q8TEB1-3	DCA11_HUMAN	DCAF11	DDB1- and CUL4-associated factor 11	276.605	299.774	316.291	301.691
Q8TEQ6	Q8TEQ6	GEMI5_HUMAN	GEMIN5	Gem-associated protein 5	971.545	887.449	896.923	824.033
Q8TEX9;Q8TEX9-2	Q8TEX9;Q8TEX9-2	IPO4_HUMAN	IPO4	Importin-4	184.412	373.397	189.197
Q8WUM4;Q8WUM4-2	Q8WUM4;Q8WUM4-2	PDC6I_HUMAN	PDCD6IP	Programmed cell death 6-interacting protein	620.786	322.992	606.415	525.904
Q8WVV9;Q8WVV9-2;Q8WVV9-3;Q8WVV9-4;Q8WVV9-5	Q8WVV9;Q8WVV9-3;Q8WVV9-2;Q8WVV9-4;Q8WVV9-5	HNRLL_HUMAN	HNRNPLL	Heterogeneous nuclear ribonucleoprotein L-like	477.99	584.204	404.409	1353.3
Q8WW59	Q8WW59	SPRY4_HUMAN	SPRYD4	SPRY domain-containing protein 4	760.138	711.667	1073.88	1378
Q8WY54	Q8WY54	PPM1E_HUMAN	PPM1E	Protein phosphatase 1E	539.18	659.22	542.605	770.418
Q92466;Q92466-2	Q92466;Q92466-2;Q92466-4	DDB2_HUMAN	DDB2	DNA damage-binding protein 2	752.034	688.632	854.628	903.78
Q92499	Q92499;Q92499-2	DDX1_HUMAN	DDX1	ATP-dependent RNA helicase DDX1	2903.71	2411.16	2498.92	2412.05
Q92522	Q92522	H1X_HUMAN	H1-10	Histone H1.10	565.454	505.556		327.077
Q92526;Q92526-3	Q92526;Q92526-2;Q92526-3	TCPW_HUMAN	CCT6B	T-complex protein 1 subunit zeta-2	3864.91	3414.97	3176.29	4400.53
Q92530	Q92530	PSMF1_HUMAN	PSMF1	Proteasome inhibitor PI31 subunit	759.992	846.435	1168.04	667.291
Q92560	Q92560	BAP1_HUMAN	BAP1	Ubiquitin carboxyl-terminal hydrolase BAP1	1150.78	982.448	667.311
Q92598;Q92598-2;Q92598-3	Q92598;Q92598-2;Q92598-3;Q92598-4	HS105_HUMAN	HSPH1	Heat shock protein 105 kDa	6231.48	6114.8	5967.03	5640.75
Q92616	Q92616	GCN1_HUMAN	GCN1	Stalled ribosome sensor GCN1	1355.62	1506.23	1471.02	1466.6
Q92620	Q92620	PRP16_HUMAN	DHX38	Pre-mRNA-splicing factor ATP-dependent RNA helicase PRP16	1767.86	1098.02	1560.61	1606.34
Q92621	Q92621	NU205_HUMAN	NUP205	Nuclear pore complex protein Nup205	943.216	1188.88	1270.1	450.6
Q92673	Q92673	SORL_HUMAN	SORL1	Sortilin-related receptor	200.488		423.578	1939.87
Q92688;Q92688-2	P39687;Q92688;Q92688-2	AN32B_HUMAN	ANP32B	Acidic leucine-rich nuclear phosphoprotein 32 family member B	1393.9	2086.64	1043.85	2319.94
Q92696	Q92696	PGTA_HUMAN	RABGGTA	Geranylgeranyl transferase type-2 subunit alpha	1224.53	809.061	744.355	882.156
Q92747;Q92747-2	Q92747;Q92747-2	ARC1A_HUMAN	ARPC1A	Actin-related protein 2/3 complex subunit 1A	810.1	999.905	1123.34	632.682
Q92878;Q92878-2;Q92878-3	Q92878;Q92878-2;Q92878-3	RAD50_HUMAN	RAD50	DNA repair protein RAD50	1845.22	1547.93	1587.98	1203.91
Q92890;Q92890-1;Q92890-3	Q92890;Q92890-1;Q92890-3	UFD1_HUMAN	UFD1	Ubiquitin recognition factor in ER-associated degradation protein 1	2475.97	3553.53	3339.62	2060.33
Q92900;Q92900-2	Q92900;Q92900-2	RENT1_HUMAN	UPF1	Regulator of nonsense transcripts 1	1449.24	1195.76	1336.05	1183.87
Q92905	Q92905	CSN5_HUMAN	COPS5	COP9 signalosome complex subunit 5	473.987	588.307	737.332	469.724
Q92915	Q92915	FGF14_HUMAN	FGF14	Fibroblast growth factor 14	2726.81	2896.1
Q92947;Q92947-2	Q92947;Q92947-2	GCDH_HUMAN	GCDH	Glutaryl-CoA dehydrogenase, mitochondrial	618.234	811.691	567.261	766.652
Q92979	Q92979	NEP1_HUMAN	EMG1	Ribosomal RNA small subunit methyltransferase NEP1	3212.05	3896.67	2658.65	2435.98
Q92995;Q92995-2	Q92995;Q92995-2	UBP13_HUMAN	USP13	Ubiquitin carboxyl-terminal hydrolase 13	1052.32	1558.06	1073.33	828.112
Q93008;Q93008-3	O00507;Q93008;O00507-2;Q93008-3	USP9X_HUMAN	USP9X	Probable ubiquitin carboxyl-terminal hydrolase FAF-X	35865.8	37733.8	36352.6	1803.22
Q93009;Q93009-3	Q93009;Q93009-3	UBP7_HUMAN	USP7	Ubiquitin carboxyl-terminal hydrolase 7	142302	145939	144136	4133.98
Q93034	Q93034	CUL5_HUMAN	CUL5	Cullin-5	721.648	601.698	369.986	529.674
Q969H8	Q969H8	MYDGF_HUMAN	MYDGF	Myeloid-derived growth factor	1273.34	1684.02	1382.97	1553.95
Q969Q0	P83881;Q969Q0	RL36L_HUMAN	RPL36AL	Ribosomal protein eL42-like	4740.6	4527.42	4669.4	3137.27
Q969Q5	Q969Q5	RAB24_HUMAN	RAB24	Ras-related protein Rab-24	470.648			4126.85
Q96A35	Q96A35	RM24_HUMAN	MRPL24	Large ribosomal subunit protein uL24m	222.056		402.973
Q96AC1;Q96AC1-2;Q96AC1-3	Q96AC1;Q96AC1-2;Q96AC1-3	FERM2_HUMAN	FERMT2	Fermitin family homolog 2		1182.83		1081.35
Q96AP4;Q96AP4-2	Q96AP4;Q96AP4-2	ZUP1_HUMAN	ZUP1	Zinc finger-containing ubiquitin peptidase 1		388.923
Q96BM9;Q9NVJ2	Q96BM9;Q9NVJ2	ARL8A_HUMAN;ARL8B_HUMAN	ARL8A;ARL8B	ADP-ribosylation factor-like protein 8A	529.181	335.376	632.723	339.323
Q96BP3	Q96BP3	PPWD1_HUMAN	PPWD1	Peptidylprolyl isomerase domain and WD repeat-containing protein 1	792.392	440.23	412.024	354.19
Q96CN7	Q96CN7	ISOC1_HUMAN	ISOC1	Isochorismatase domain-containing protein 1	4707.38	4506	4827.58	4328.7
Q96CW1;Q96CW1-2	Q96CW1;Q96CW1-2	AP2M1_HUMAN	AP2M1	AP-2 complex subunit mu	3812.62	4196.79	3948.8	3419.06
Q96D46	Q96D46	NMD3_HUMAN	NMD3	60S ribosomal export protein NMD3	1741.32	1961.37	1476.29	1928.9
Q96DC9	Q96DC9	OTUB2_HUMAN	OTUB2	Ubiquitin thioesterase OTUB2	4783.94	4983.51	5092.63	5564.59
Q96DG6	Q96DG6	CMBL_HUMAN	CMBL	Carboxymethylenebutenolidase homolog	1179.24	1384.32	434.268	1190.53
Q96EE3;Q96EE3-1	Q96EE3;Q96EE3-1	SEH1_HUMAN	SEH1L	Nucleoporin SEH1	578.483	440.033	807.043	533.97
Q96EK6	Q96EK6	GNA1_HUMAN	GNPNAT1	Glucosamine 6-phosphate N-acetyltransferase	990.805	651.76	511.581	1176.48
Q96FW1	Q96FW1;Q96FW1-2	OTUB1_HUMAN	OTUB1	Ubiquitin thioesterase OTUB1	73733.5	76928.9	70928.1	1759.53
Q96FZ2	Q96FZ2	HMCES_HUMAN	HMCES	Abasic site processing protein HMCES	1126.41	1014.35	1068.85	1079.5
Q96G03	Q96G03;Q96G03-2	PGM2_HUMAN	PGM2	Phosphopentomutase	2009.33	1993.15	1837.92	2240.73
Q96HY7	Q96HY7	DHTK1_HUMAN	DHTKD1	2-oxoadipate dehydrogenase complex component E1	2635.24	2763.87	2172.47	1904.6
Q96I59;Q96I59-2	Q96I59;Q96I59-2	SYNM_HUMAN	NARS2	Probable asparagine--tRNA ligase, mitochondrial	1366.61	1139.33	989.783	734.327
Q96IR7	Q96IR7	HPDL_HUMAN	HPDL	4-hydroxyphenylpyruvate dioxygenase-like protein	1246.9	1393.81	1643.64	1299.11
Q96J01;Q96J01-2	Q96J01;Q96J01-2	THOC3_HUMAN	THOC3	THO complex subunit 3	1963.43	1953.7	1902.23	2321.06
Q96J02;Q96J02-2;Q96J02-3	O00308;Q96J02;Q9H0M0;Q96J02-2;O00308-2;O00308-3;Q96J02-3;Q9H0M0-3;Q9H0M0-6	ITCH_HUMAN	ITCH	E3 ubiquitin-protein ligase Itchy homolog	993.482	1189.39	938.4
Q96JH7	Q96JH7	VCIP1_HUMAN	VCPIP1	Deubiquitinating protein VCPIP1	4799	4810.43	4447.12
Q96JK2;Q96JK2-2;Q96JK2-3	Q96JK2;Q96JK2-2;Q96JK2-3	DCAF5_HUMAN	DCAF5	DDB1- and CUL4-associated factor 5	938.76	1268.82	937.926	1010.69
Q96K76;Q96K76-4	Q96K76;Q96K76-2;Q96K76-4	UBP47_HUMAN	USP47	Ubiquitin carboxyl-terminal hydrolase 47	14251	14847.3	14884.7	2781.23
Q96KP4	Q96KP4	CNDP2_HUMAN	CNDP2	Cytosolic non-specific dipeptidase	3400.69	2325.19	1962.8	3989.19
Q96LA8;Q96LA8-2	Q96LA8;Q96LA8-2	ANM6_HUMAN	PRMT6	Protein arginine N-methyltransferase 6	1287.55	668.61	962.363	956.568
Q96LI5;Q9ULM6	Q96LI5;Q9ULM6	CNO6L_HUMAN;CNOT6_HUMAN	CNOT6;CNOT6L	CCR4-NOT transcription complex subunit 6-like	1047.97	1067.66	1145.39	1104.49
Q96MN9;Q96MN9-2	Q96MN9;Q96MN9-2	ZN488_HUMAN	ZNF488	Zinc finger protein 488		1155.65
Q96NE9;Q96NE9-2	Q96NE9;Q96NE9-2	FRMD6_HUMAN	FRMD6	FERM domain-containing protein 6	22674.3	18018.4	45549.1	60820.3
Q96Q11;Q96Q11-2	Q96Q11;Q96Q11-2	TRNT1_HUMAN	TRNT1	CCA tRNA nucleotidyltransferase 1, mitochondrial	1172.76	885.548	861.4	1330.91
Q96RP9	Q96RP9;Q96RP9-2	EFGM_HUMAN	GFM1	Elongation factor G, mitochondrial	2975.66	3385.47	2921.3	3797.9
Q96RQ3	Q96RQ3	MCCA_HUMAN	MCCC1	Methylcrotonoyl-CoA carboxylase subunit alpha, mitochondrial	1465.21	1293.42	1226.77	591.76
Q96RS0	Q96RS0	TGS1_HUMAN	TGS1	Trimethylguanosine synthase	628.691		858.693	383.014
Q96RS6;Q96RS6-2	Q96RS6;Q96RS6-2;Q96RS6-3	NUDC1_HUMAN	NUDCD1	NudC domain-containing protein 1	3531.77	2989.14	3241.09	4349.06
Q96RU2;Q96RU2-2	Q96RU2;Q96RU2-2;Q96RU2-3	UBP28_HUMAN	USP28	Ubiquitin carboxyl-terminal hydrolase 28	10386.9	10374.4	12646
Q96S55;Q96S55-2;Q96S55-3	Q96S55;Q96S55-2;Q96S55-3;Q96S55-4	WRIP1_HUMAN	WRNIP1	ATPase WRNIP1	1923.87	1649.06	2222.42	1910.79
Q96SU4;Q96SU4-2;Q96SU4-6;Q96SU4-7	Q96SU4;Q96SU4-2;Q96SU4-6;Q96SU4-7	OSBL9_HUMAN	OSBPL9	Oxysterol-binding protein-related protein 9	1471.72	1774.58	1544.05	1008.24
Q99460;Q99460-2	Q99460;Q99460-2	PSMD1_HUMAN	PSMD1	26S proteasome non-ATPase regulatory subunit 1	3054.02	3240.11	2986.17	2929.86
Q99570	Q99570	PI3R4_HUMAN	PIK3R4	Phosphoinositide 3-kinase regulatory subunit 4	839.453	417.249	355.532	467.282
Q99575	Q99575	POP1_HUMAN	POP1	Ribonucleases P/MRP protein subunit POP1	2291.91	2058.4	2316.91	1506.48
Q99714;Q99714-2	Q99714;Q99714-2	HCD2_HUMAN	HSD17B10	3-hydroxyacyl-CoA dehydrogenase type-2	7891.77	7041.63	6434.29	6984.75
Q99729-2;Q99729-3	Q99729;Q99729-2;Q99729-3;Q99729-4	ROAA_HUMAN	HNRNPAB	Isoform 2 of Heterogeneous nuclear ribonucleoprotein A/B	2046.83	2436.59	2319.57	6259.46
Q99798	Q99798	ACON_HUMAN	ACO2	Aconitate hydratase, mitochondrial	1597.49	1602.9	1993.77	2045.65
Q99829	Q99829	CPNE1_HUMAN	CPNE1	Copine-1	2723.2	2954.58	2425.57	2397.36
Q99832;Q99832-3	Q99832;Q99832-2;Q99832-3;Q99832-4	TCPH_HUMAN	CCT7	T-complex protein 1 subunit eta	4815.89	4112.71	3872.26	4763.77
Q99873;Q99873-2;Q99873-3	Q99873;Q99873-3;Q99873-2	ANM1_HUMAN	PRMT1	Protein arginine N-methyltransferase 1	18617.6	19501.1	18830.1	15450.3
Q9BQ52;Q9BQ52-4	Q9BQ52;Q9BQ52-3;Q9BQ52-4	RNZ2_HUMAN	ELAC2	Zinc phosphodiesterase ELAC protein 2	1712.78	1484.36	1480.64	1506.59
Q9BQ61	Q9BQ61	TRIR_HUMAN	TRIR	Telomerase RNA component interacting RNase	15663.7	17711.1	20455.9	20847.5
Q9BQ67	Q9BQ67	GRWD1_HUMAN	GRWD1	Glutamate-rich WD repeat-containing protein 1	391.289	164.582	496.986
Q9BQA1	Q9BQA1	MEP50_HUMAN	WDR77	Methylosome protein WDR77	5913.15	5331.77	4692.17	4918.09
Q9BR76	Q9BR76	COR1B_HUMAN	CORO1B	Coronin-1B	7874.2	8137.4	6602.14	9669.44
Q9BRJ2	Q9BRJ2	RM45_HUMAN	MRPL45	Large ribosomal subunit protein mL45	882.048	584.566	762.763	290.553
Q9BRP4	Q9BRP4;Q9BRP4-2;Q9BRP4-3	PAAF1_HUMAN	PAAF1	Proteasomal ATPase-associated factor 1	1123.89	1165.24	1374.11	1209.81
Q9BS92;Q9UFN0	Q9UFN0;Q9BS92	NPS3A_HUMAN;NPS3B_HUMAN	NIPSNAP3A;NIPSNAP3B	Protein NipSnap homolog 3B	564.037	778.211	350.734	303.542
Q9BSB4	Q9BSB4	ATGA1_HUMAN	ATG101	Autophagy-related protein 101	182.483		365.154	384.918
Q9BSH4	Q9BSH4	TACO1_HUMAN	TACO1	Translational activator of cytochrome c oxidase 1	956.504	1270.17	1018.74	941.329
Q9BT73	Q9BT73	PSMG3_HUMAN	PSMG3	Proteasome assembly chaperone 3	908.734	754.577	992.076	558.384
Q9BUF5	Q13509;Q9BUF5;Q13509-2	TBB6_HUMAN	TUBB6	Tubulin beta-6 chain	3704.61	2315.58	2217.39	2854.62
Q9BUJ2;Q9BUJ2-2;Q9BUJ2-4	Q9BUJ2;Q9BUJ2-2;Q9BUJ2-3;Q9BUJ2-4	HNRL1_HUMAN	HNRNPUL1	Heterogeneous nuclear ribonucleoprotein U-like protein 1	4238.48	4873.52	4653.04	4141.5
Q9BUN8;Q9BUN8-2	Q9BUN8;Q9BUN8-2	DERL1_HUMAN	DERL1	Derlin-1	1242.58	1233.62	1105.74
Q9BUQ8	Q9BUQ8	DDX23_HUMAN	DDX23	Probable ATP-dependent RNA helicase DDX23	485.968	791.08	716.5	1113.41
Q9BV44	Q9BV44	THUM3_HUMAN	THUMPD3	tRNA (guanine(6)-N2)-methyltransferase THUMP3	1333.5	832.38	999.191	959.925
Q9BWD1;Q9BWD1-2	Q9BWD1;Q9BWD1-2	THIC_HUMAN	ACAT2	Acetyl-CoA acetyltransferase, cytosolic	2027.51	1620.42	1266.47	1984.58
Q9BWU0	Q9BWU0	NADAP_HUMAN	SLC4A1AP	Kanadaptin	758.285	712.719	740.136	6707.47
Q9BX63;Q9BX63-2	Q9BX63;Q9BX63-2	FANCJ_HUMAN	BRIP1	Fanconi anemia group J protein	822.264	798.871	621.318	742.609
Q9BXB4;Q9BXB5;Q9BXB5-2	Q9BXB4;Q9BXB5;Q9BXB5-2	OSB10_HUMAN;OSB11_HUMAN	OSBPL10;OSBPL11	Oxysterol-binding protein-related protein 11	1006.14	1463.64	1189.38	723.329
Q9BXS5;Q9BXS5-2	Q9BXS5;Q9BXS5-2	AP1M1_HUMAN	AP1M1	AP-1 complex subunit mu-1	1262.05	2078.73	1410.21	1343.87
Q9BY44;Q9BY44-3	Q9BY44;Q9BY44-3;Q9BY44-4	EIF2A_HUMAN	EIF2A	Eukaryotic translation initiation factor 2A	2982.98	2616.42	2748.84	3019
Q9BYB4;Q9BYB4-2	Q9BYB4;Q9BYB4-2	GNB1L_HUMAN	GNB1L	Guanine nucleotide-binding protein subunit beta-like protein 1	1191.04	1054.3	1660.79	1072.48
Q9BYC9;Q9BYC9-2	Q9BYC9;Q9BYC9-2	RM20_HUMAN	MRPL20	Large ribosomal subunit protein bL20m		260.816	274.901	812.615
Q9BYD1	Q9BYD1	RM13_HUMAN	MRPL13	Large ribosomal subunit protein uL13m	511.134		585.659	1005.4
Q9BYE9	Q9BYE9	CDHR2_HUMAN	CDHR2	Cadherin-related family member 2	1274.92	2313.35	2085.52	3664.52
Q9BYG4;Q9BYG5;Q9NPB6;Q9NPB6-2	Q9BYG4;Q9BYG5;Q9NPB6;Q9NPB6-2	PAR6A_HUMAN;PAR6B_HUMAN;PAR6G_HUMAN	PARD6A;PARD6B;PARD6G	Partitioning defective 6 homolog gamma	1064.73	803.42		1393.2
Q9BYZ2	Q9BYZ2	LDH6B_HUMAN	LDHAL6B	L-lactate dehydrogenase A-like 6B	3921.08	4863.69	4986.77	6744.5
Q9BZC7;Q9BZC7-2;Q9BZC7-3;Q9BZC7-4	Q9BZC7;Q9BZC7-2;Q9BZC7-3;Q9BZC7-4	ABCA2_HUMAN	ABCA2	ATP-binding cassette sub-family A member 2	4854.16	4535.78	3978.6	5769.83
Q9BZE4	Q9BZE4;Q9BZE4-2;Q9BZE4-3	GTPB4_HUMAN	GTPBP4	GTP-binding protein 4	2199.61	1623.97	1479.03	1216.11
Q9BZG8;Q9BZG8-1;Q9BZG8-2	Q9BZG8;Q9BZG8-1;Q9BZG8-2	DPH1_HUMAN	DPH1	2-(3-amino-3-carboxypropyl)histidine synthase subunit 1	951.57	1109.68	921.566	794.865
Q9BZH6	Q9BZH6	WDR11_HUMAN	WDR11	WD repeat-containing protein 11	891.433	321.3	354.349	537.373
Q9BZK7	Q9BZK7	TBL1R_HUMAN	TBL1XR1	F-box-like/WD repeat-containing protein TBL1XR1	1562	2960.35	2323.4	2063.49
Q9C0A0;Q9C0A0-2	Q9C0A0;Q9C0A0-2	CNTP4_HUMAN	CNTNAP4	Contactin-associated protein-like 4	6761.28	5854.42	8096.09	15224.5
Q9C0B1	Q9C0B1	FTO_HUMAN	FTO	Alpha-ketoglutarate-dependent dioxygenase FTO	1317.1	1281.05	1052.59	1344.49
Q9C0C9	Q9C0C9	UBE2O_HUMAN	UBE2O	(E3-independent) E2 ubiquitin-conjugating enzyme		493.432	482.272
Q9GZL7	Q9GZL7	WDR12_HUMAN	WDR12	Ribosome biogenesis protein WDR12	401.381	741.679	552.925	603.572
Q9GZN8;Q9GZN8-2	Q9GZN8;Q9GZN8-2	ADSSP_HUMAN	ADISSP	Adipose-secreted signaling protein	2495.57	3117.5	3116.68	2058.78
Q9GZT8;Q9GZT8-2;Q9GZT8-3	Q9GZT8;Q9GZT8-2;Q9GZT8-3	NIF3L_HUMAN	NIF3L1	NIF3-like protein 1	1992.45	924.736	1377.26	1389.71
Q9GZZ1	Q9GZZ1;Q9GZZ1-2	NAA50_HUMAN	NAA50	N-alpha-acetyltransferase 50	2849.56	2681.6	2616.07	3023.61
Q9H082	Q9H082	RB33B_HUMAN	RAB33B	Ras-related protein Rab-33B	5903.87	5203.53		7131.88
Q9H0A0;Q9H0A0-2	Q9H0A0;Q9H0A0-2	NAT10_HUMAN	NAT10	RNA cytidine acetyltransferase	784.138	803.199	1181.03	566.314
Q9H0A8	Q9H0A8	COMD4_HUMAN	COMMD4	COMM domain-containing protein 4	431.409	169.123		929.554
Q9H0C8	Q9H0C8	ILKAP_HUMAN	ILKAP	Integrin-linked kinase-associated serine/threonine phosphatase 2C	611.642	822.176	489.514	773.1
Q9H0U4	P62820;Q9H0U4;Q92928;P62820-2	RAB1B_HUMAN	RAB1B	Ras-related protein Rab-1B	15874.1	16358.6	16034.4	15910.9
Q9H1H9;Q9H1H9-2;Q9H1H9-3;Q9H1H9-4	Q9H1H9;Q9H1H9-2;Q9H1H9-3;Q9H1H9-4	KI13A_HUMAN	KIF13A	Kinesin-like protein KIF13A	344.446	320.273	590.276	2044.48
Q9H1R2-2;Q9H1R2-3;Q9H1R2-4	Q9H1R2-3;Q9H1R2-2;Q9H1R2-4	DUS15_HUMAN	DUSP15	Isoform 2 of Dual specificity protein phosphatase 15	2722.92	2751.63	4126.96	5006.57
Q9H267;Q9H267-2	Q9H267;Q9H267-2	VP33B_HUMAN	VPS33B	Vacuolar protein sorting-associated protein 33B	958.563	637.626	647.51
Q9H269	Q9H269;Q9H269-2	VPS16_HUMAN	VPS16	Vacuolar protein sorting-associated protein 16 homolog	1256.33	1300.83	1340.21	1203.11
Q9H270	Q9H270	VPS11_HUMAN	VPS11	Vacuolar protein sorting-associated protein 11 homolog	857.624	438.541	686.92
Q9H2P9;Q9H2P9-2;Q9H2P9-3;Q9H2P9-4;Q9H2P9-5;Q9H2P9-6	Q9H2P9;Q9H2P9-2;Q9H2P9-3;Q9H2P9-4;Q9H2P9-5;Q9H2P9-6	DPH5_HUMAN	DPH5	Diphthine methyl ester synthase	175.995	525.602	175.066
Q9H2U1;Q9H2U1-2;Q9H2U1-3	Q9H2U1;Q9H2U1-2;Q9H2U1-3	DHX36_HUMAN	DHX36	ATP-dependent DNA/RNA helicase DHX36	165.944	265.506	575.601	831.636
Q9H3K6	Q9H3K6	BOLA2_HUMAN	BOLA2	BolA-like protein 2	1437.42	1761.81	2207.21	1607.2
Q9H3M7;Q9H3M7-2	Q9H3M7;Q9H3M7-2	TXNIP_HUMAN	TXNIP	Thioredoxin-interacting protein	1195.73	1528.24	905.329	1339.92
Q9H3P7	Q9H3P7	GCP60_HUMAN	ACBD3	Golgi resident protein GCP60	661.742	1118.44	736.633
Q9H4A4	Q9H4A4	AMPB_HUMAN	RNPEP	Aminopeptidase B	11939.2	10900.9	11470.1	9486
Q9H6R4;Q9H6R4-4	Q9H6R4;Q9H6R4-4	NOL6_HUMAN	NOL6	Nucleolar protein 6	294.085	528.386	368.361
Q9H8H2	Q9H8H2;Q9H8H2-2;Q9H8H2-4	DDX31_HUMAN	DDX31	Probable ATP-dependent RNA helicase DDX31	969.459	983.386	818.017	662.873
Q9H900;Q9H900-2	Q9H900;Q9H900-2	ZWILC_HUMAN	ZWILCH	Protein zwilch homolog	690.927	818.429	661.313	680.631
Q9H993	Q9H993	ARMT1_HUMAN	ARMT1	Damage-control phosphatase ARMT1	4204.65	4138.99	3740.79	3767.06
Q9H9G7	Q9H9G7	AGO3_HUMAN	AGO3	Protein argonaute-3	768.955	802.172	1312.96	607.028
Q9H9P8;Q9H9P8-2	Q9H9P8;Q9H9P8-2	L2HDH_HUMAN	L2HGDH	L-2-hydroxyglutarate dehydrogenase, mitochondrial	1064.23	873.972	914.202	654.146
Q9H9T3;Q9H9T3-2	Q9H9T3;Q9H9T3-2;Q9H9T3-4;Q9H9T3-5	ELP3_HUMAN	ELP3	Elongator complex protein 3	3108.17	3896.9	3558.82	3450.04
Q9HAV4	Q9HAV4	XPO5_HUMAN	XPO5	Exportin-5		475.842	222.191
Q9HB07	Q9HB07	MYG1_HUMAN	MYG1	MYG1 exonuclease	1944.57	1795.83	1588.89	2101.8
Q9HB71	Q9HB71;Q9HB71-3	CYBP_HUMAN	CACYBP	Calcyclin-binding protein	4120.9	5169.25	4472.39	1853.87
Q9HC38;Q9HC38-2	Q9HC38;Q9HC38-2;Q9HC38-3	GLOD4_HUMAN	GLOD4	Glyoxalase domain-containing protein 4	1572.94	1308.64	1441.27	1281.67
Q9HCC0	Q9HCC0;Q9HCC0-2	MCCB_HUMAN	MCCC2	Methylcrotonoyl-CoA carboxylase beta chain, mitochondrial	3215.85	2631.32	2774.83	4410.91
Q9HCE1	Q9HCE1;Q9HCE1-2	MOV10_HUMAN	MOV10	Helicase MOV-10	4977.42	3961.59	4243.1	3075.23
Q9HCM4;Q9HCM4-2;Q9HCM4-3;Q9HCM4-4	Q9HCM4;Q9HCM4-2;Q9HCM4-3;Q9HCM4-4	E41L5_HUMAN	EPB41L5	Band 4.1-like protein 5	895.605	488.711	726.251	762.27
Q9NNW5	Q9NNW5	WDR6_HUMAN	WDR6	WD repeat-containing protein 6	2033.96	1924.29	2547.97	1720.2
Q9NP58;Q9NP58-4	Q9NP58;Q9NP58-4	ABCB6_HUMAN	ABCB6	ATP-binding cassette sub-family B member 6	900.811	823.09	1313.03	1051.44
Q9NP81;Q9NP81-2	Q9NP81;Q9NP81-2	SYSM_HUMAN	SARS2	Serine--tRNA ligase, mitochondrial	1082.66	999.186	835.815	863.22
Q9NP92	Q9NP92	RT30_HUMAN	MRPS30	Large ribosomal subunit protein mL65	320.209		497.798
Q9NP97	Q9NP97	DLRB1_HUMAN	DYNLRB1	Dynein light chain roadblock-type 1	386.332	369.377	513.166	1027.62
Q9NPD3	Q9NPD3	EXOS4_HUMAN	EXOSC4	Exosome complex component RRP41	1350.01	804.599		1277.62
Q9NPJ3;Q9NPJ3-2	Q9NPJ3;Q9NPJ3-2	ACO13_HUMAN	ACOT13	Acyl-coenzyme A thioesterase 13	1894.85	1143.89	1229.41	1147.6
Q9NQ88	Q9NQ88	TIGAR_HUMAN	TIGAR	Fructose-2,6-bisphosphatase TIGAR	190.181	115.824	312.542	228.245
Q9NQR4	Q9NQR4	NIT2_HUMAN	NIT2	Omega-amidase NIT2	1850.56	1611.02	1438.47	1415.82
Q9NQW7;Q9NQW7-2;Q9NQW7-3;Q9NQW7-4	Q9NQW7;Q9NQW7-3;Q9NQW7-2;Q9NQW7-4	XPP1_HUMAN	XPNPEP1	Xaa-Pro aminopeptidase 1	1327.32	1627.46	1102.03	1519.17
Q9NQX4	Q9NQX4	MYO5C_HUMAN	MYO5C	Unconventional myosin-Vc	674.753	487.963	785.192
Q9NR30	Q9NR30;Q9NR30-2	DDX21_HUMAN	DDX21	Nucleolar RNA helicase 2	4507.34	4532.98	4622.12	3813.47
Q9NR31;Q9Y6B6	Q9NR31;Q9Y6B6	SAR1A_HUMAN;SAR1B_HUMAN	SAR1A;SAR1B	GTP-binding protein SAR1a	2182.87	1530.72	1686.25	2431.53
Q9NR45	Q9NR45	SIAS_HUMAN	NANS	Sialic acid synthase	1365.58	1203.74	726.669	1533.35
Q9NRF8	P17812;Q9NRF8	PYRG2_HUMAN	CTPS2	CTP synthase 2	914.027	1080.29	728.994	1446.54
Q9NRW7	Q9NRW7	VPS45_HUMAN	VPS45	Vacuolar protein sorting-associated protein 45	869.986	627.359	499.797	772.626
Q9NRY4	Q9NRY4	RHG35_HUMAN	ARHGAP35	Rho GTPase-activating protein 35	1248.94	800.158	1105.15	6168.79
Q9NSD9	Q9NSD9	SYFB_HUMAN	FARSB	Phenylalanine--tRNA ligase beta subunit	1480.41	1229.43	1054.7	1694.01
Q9NSE4	Q9NSE4	SYIM_HUMAN	IARS2	Isoleucine--tRNA ligase, mitochondrial	675.645	387.882	320.206	678.103
Q9NT62;Q9NT62-2	Q9NT62;Q9NT62-2	ATG3_HUMAN	ATG3	Ubiquitin-like-conjugating enzyme ATG3	372.462	358.031	300.057	692.306
Q9NTJ3	Q9NTJ3;Q9NTJ3-2	SMC4_HUMAN	SMC4	Structural maintenance of chromosomes protein 4	2844.55	2972.14	2743.84	2696.3
Q9NTK5	Q9NTK5;Q9NTK5-3	OLA1_HUMAN	OLA1	Obg-like ATPase 1	814.516	718.634	773.318	779.457
Q9NU22	Q9NU22	MDN1_HUMAN	MDN1	Midasin	561.906	658.118	820.886	709.85
Q9NUQ8;Q9NUQ8-2	Q9NUQ8;Q9NUQ8-2	ABCF3_HUMAN	ABCF3	ATP-binding cassette sub-family F member 3	3013.64	3229.27	3192.14	2712.95
Q9NUU7;Q9NUU7-2;Q9UHL0;Q9UHL0-2	Q9NUU7;Q9UHL0;Q9NUU7-2;Q9UHL0-2	DD19A_HUMAN;DDX25_HUMAN	DDX19A;DDX25	ATP-dependent RNA helicase DDX19A	1403.03	1997.71	1446.6	1305.24
Q9NVA2;Q9NVA2-2	Q14141;Q92599;Q9NVA2;Q14141-2;Q14141-3;Q14141-4;Q92599-2;Q92599-3;Q92599-4;Q9NVA2-2	SEP11_HUMAN	SEPTIN11	Septin-11	2078.69	1900.43	2288.41	2621.3
Q9NVE5;Q9NVE5-3	Q9NVE5;Q9NVE5-3	UBP40_HUMAN	USP40	Ubiquitin carboxyl-terminal hydrolase 40	2920.85	3155.66	2780.92
Q9NVE7	Q9NVE7	PANK4_HUMAN	PANK4	4'-phosphopantetheine phosphatase	1474.35	1452.68	1602.39	1324.72
Q9NVI1;Q9NVI1-1;Q9NVI1-2	Q9NVI1;Q9NVI1-1;Q9NVI1-2	FANCI_HUMAN	FANCI	Fanconi anemia group I protein	547.608	736.875	671.673	575.011
Q9NVM9;Q9NVM9-2	Q9NVM9;Q9NVM9-2	INT13_HUMAN	INTS13	Integrator complex subunit 13	394.181	698.802	651.655	444.705
Q9NVP1	Q9NVP1	DDX18_HUMAN	DDX18	ATP-dependent RNA helicase DDX18	494.1	617.44
Q9NVX2	Q9NVX2	NLE1_HUMAN	NLE1	Notchless protein homolog 1	1291.78	2268.9	1896.99	2371.77
Q9NW08;Q9NW08-2	Q9NW08;Q9NW08-2	RPC2_HUMAN	POLR3B	DNA-directed RNA polymerase III subunit RPC2	1049.04	1011.92	1201.72	1584.22
Q9NW82	Q9NW82	WDR70_HUMAN	WDR70	WD repeat-containing protein 70	800.38	641.742	838.061	809.068
Q9NX74	Q9NX74	DUS2L_HUMAN	DUS2	tRNA-dihydrouridine(20) synthase [NAD(P)+]-like	2735.33	2085.19	1918.42	2727.44
Q9NXH9;Q9NXH9-2	Q9NXH9;Q9NXH9-2	TRM1_HUMAN	TRMT1	tRNA (guanine(26)-N(2))-dimethyltransferase	617.932	1114.4	432.949	839.009
Q9NYK5;Q9NYK5-2	Q9NYK5;Q9NYK5-2	RM39_HUMAN	MRPL39	Large ribosomal subunit protein mL39	732.252	1090.96	699.445	726.53
Q9NYQ7;Q9NYQ7-2	Q9NYQ7;Q9NYQ7-2	CELR3_HUMAN	CELSR3	Cadherin EGF LAG seven-pass G-type receptor 3	1939.48	2192.93	2904.3	1319.47
Q9NYR9;Q9NYR9-2;Q9NYR9-3	Q9NYR9;Q9NYR9-2;Q9NYR9-3	KBRS2_HUMAN	NKIRAS2	NF-kappa-B inhibitor-interacting Ras-like protein 2	322.128	627.633	469.224	343.526
Q9NYU2;Q9NYU2-2	Q9NYU2;Q9NYU2-2	UGGG1_HUMAN	UGGT1	UDP-glucose:glycoprotein glucosyltransferase 1	2051.97	3237.71	2622.74	4051.96
Q9NZJ4	Q9NZJ4;Q9NZJ4-2	SACS_HUMAN	SACS	Sacsin	1493.96	601.45	1103.1	601.758
Q9NZL9;Q9NZL9-2;Q9NZL9-4	Q9NZL9;Q9NZL9-2;Q9NZL9-3;Q9NZL9-4;Q9NZL9-5	MAT2B_HUMAN	MAT2B	Methionine adenosyltransferase 2 subunit beta	2560.25	1904.22	1827.13	2924.67
Q9NZM1;Q9NZM1-2;Q9NZM1-3;Q9NZM1-6	Q9NZM1;Q9NZM1-2;Q9NZM1-3;Q9NZM1-5;Q9NZM1-6	MYOF_HUMAN	MYOF	Myoferlin	930.736	982.462	859.807	1066.59
Q9P258	Q9P258	RCC2_HUMAN	RCC2	Protein RCC2	10022.9	11129.4	9949.94	8365.82
Q9P287;Q9P287-2;Q9P287-3;Q9P287-4	Q9P287;Q9P287-2;Q9P287-3;Q9P287-4	BCCIP_HUMAN	BCCIP	BRCA2 and CDKN1A-interacting protein	817.24	612.431	550.699	691.625
Q9P2H5	Q9P2H5;Q9P2H5-2	UBP35_HUMAN	USP35	Ubiquitin carboxyl-terminal hydrolase 35	952.763	547.684	841.586
Q9P2J5	Q9P2J5;Q9P2J5-2	SYLC_HUMAN	LARS1	Leucine--tRNA ligase, cytoplasmic	4192.86	4216	4229.09	3970.15
Q9P2R3;Q9P2R3-2;Q9P2R3-4	Q9P2R3;Q9P2R3-2;Q9P2R3-4	ANFY1_HUMAN	ANKFY1	Rabankyrin-5	2233.6	2034.19	1990.95	1643.64
Q9P2R7;Q9P2R7-2	Q9P2R7;Q9P2R7-2	SUCB1_HUMAN	SUCLA2	Succinate--CoA ligase [ADP-forming] subunit beta, mitochondrial	589.194	410.731		225.987
Q9UBE0	Q9UBE0	SAE1_HUMAN	SAE1	SUMO-activating enzyme subunit 1	142.808	186.897	243.611	169.492
Q9UBQ0	Q9UBQ0;Q9UBQ0-2	VPS29_HUMAN	VPS29	Vacuolar protein sorting-associated protein 29	2414.16	2193.84	2060.39	1511.07
Q9UG63;Q9UG63-2	Q9UG63;Q9UG63-2	ABCF2_HUMAN	ABCF2	ATP-binding cassette sub-family F member 2	5156.24	4888.17	5351.61	3957.79
Q9UHD1	Q9UHD1	CHRD1_HUMAN	CHORDC1	Cysteine and histidine-rich domain-containing protein 1	1654.75	1493.43	1539.08	1753.62
Q9UHD8;Q9UHD8-2;Q9UHD8-3;Q9UHD8-5;Q9UHD8-7	Q9UHD8;Q9UHD8-2;Q9UHD8-3;Q9UHD8-4;Q9UHD8-5;Q9UHD8-7;Q9UHD8-8;Q9UHD8-9	SEPT9_HUMAN	SEPTIN9	Septin-9	2358.67	2496.27	1876.49	1970.35
Q9UHP3;Q9UHP3-1;Q9UHP3-3	Q9UHP3;Q9UHP3-1;Q9UHP3-3	UBP25_HUMAN	USP25	Ubiquitin carboxyl-terminal hydrolase 25	2390.52	1873.02	1971.57
Q9UJ68;Q9UJ68-2;Q9UJ68-3;Q9UJ68-4;Q9UJ68-5	Q9UJ68;Q9UJ68-5;Q9UJ68-2;Q9UJ68-3;Q9UJ68-4	MSRA_HUMAN	MSRA	Mitochondrial peptide methionine sulfoxide reductase	784.739	713.873	790.906
Q9UJW0;Q9UJW0-2;Q9UJW0-3	Q9UJW0;Q9UJW0-2;Q9UJW0-3	DCTN4_HUMAN	DCTN4	Dynactin subunit 4	816.13	834.676	1381.39	1044.8
Q9UKF6	Q9UKF6	CPSF3_HUMAN	CPSF3	Cleavage and polyadenylation specificity factor subunit 3	777.969	669.257	991.45	689.372
Q9UKJ3;Q9UKJ3-2	Q9UKJ3;Q9UKJ3-2	GPTC8_HUMAN	GPATCH8	G patch domain-containing protein 8				1024.17
Q9UKN8	Q9UKN8	TF3C4_HUMAN	GTF3C4	General transcription factor 3C polypeptide 4	853.507	643.182	916.771
Q9UKX5;Q9UKX5-2	Q9UKX5;Q9UKX5-2	ITA11_HUMAN	ITGA11	Integrin alpha-11	1035.43	691.294	1013.95	814.011
Q9UL25	Q9UL25	RAB21_HUMAN	RAB21	Ras-related protein Rab-21	1543.35	1434.18	1723.32	1213.24
Q9UL26	Q13636;Q9UL26	RB22A_HUMAN	RAB22A	Ras-related protein Rab-22A			1339.51	17822.1
Q9ULA0;Q9ULA0-2	Q9ULA0;Q9ULA0-2	DNPEP_HUMAN	DNPEP	Aspartyl aminopeptidase	4732.41	3975.01	4864.27	4700.8
Q9ULJ7;Q9ULJ7-2	Q9ULJ7;Q9ULJ7-2	ANR50_HUMAN	ANKRD50	Ankyrin repeat domain-containing protein 50	229.816	593.385	367.855	446.946
Q9ULT8	Q9ULT8	HECD1_HUMAN	HECTD1	E3 ubiquitin-protein ligase HECTD1	994.265	659.624	1115.49	761.052
Q9UMS4	Q9UMS4	PRP19_HUMAN	PRPF19	Pre-mRNA-processing factor 19	3539.85	5099.32	5080.77	4223.71
Q9UNQ2	Q9UNQ2	DIM1_HUMAN	DIMT1	Probable dimethyladenosine transferase	1798.92	1811.9	1743.19	1855.66
Q9UPN3;Q9UPN3-2;Q9UPN3-3;Q9UPN3-4	Q9UPN3;Q9UPN3-2;Q9UPN3-3;Q9UPN3-4	MACF1_HUMAN	MACF1	Microtubule-actin cross-linking factor 1, isoforms 1/2/3/4/5	230.26	366.238	341.364	265.87
Q9UPT9;Q9UPT9-2	Q9UPT9;Q9UPT9-2	UBP22_HUMAN	USP22	Ubiquitin carboxyl-terminal hydrolase 22	3913.03	3443.42	3578.88	1978.24
Q9UPU5	Q9UPU5	UBP24_HUMAN	USP24	Ubiquitin carboxyl-terminal hydrolase 24	8903	9328.04	9041.52	911.671
Q9UQ80	Q9UQ80;Q9UQ80-2	PA2G4_HUMAN	PA2G4	Proliferation-associated protein 2G4	6287.07	6288.61	5359.38	6315.85
Q9Y230	Q9Y230;Q9Y230-2	RUVB2_HUMAN	RUVBL2	RuvB-like 2	1584.5	955.841	746.314	1507.41
Q9Y262;Q9Y262-2	Q9Y262;Q9Y262-2	EIF3L_HUMAN	EIF3L	Eukaryotic translation initiation factor 3 subunit L	154.896	466.363		330.314
Q9Y263	Q9Y263	PLAP_HUMAN	PLAA	Phospholipase A-2-activating protein	1066.15	1005.04	1613.66	933.419
Q9Y265	Q9Y265	RUVB1_HUMAN	RUVBL1	RuvB-like 1	425.462	496.393	316.929	526.359
Q9Y295	Q9Y295	DRG1_HUMAN	DRG1	Developmentally-regulated GTP-binding protein 1	1115.24	869.797	964.276	1085.28
Q9Y2A7;Q9Y2A7-2	P55160;Q9Y2A7;Q9Y2A7-2;P55160-2	NCKP1_HUMAN	NCKAP1	Nck-associated protein 1	1567.36	1408.05	1639.32	1686.97
Q9Y2I8;Q9Y2I8-2;Q9Y2I8-3	Q9Y2I8;Q9Y2I8-3;Q9Y2I8-2	WDR37_HUMAN	WDR37	WD repeat-containing protein 37	1459.9	1434.1	1003.06
Q9Y2L1	Q9Y2L1;Q9Y2L1-2	RRP44_HUMAN	DIS3	Exosome complex exonuclease RRP44	1035.04	1436.64	1209.81	1006.76
Q9Y2S7	Q9Y2S7	PDIP2_HUMAN	POLDIP2	Polymerase delta-interacting protein 2	1572.48	1756.07	1242.56	1398.06
Q9Y2T2	Q9Y2T2	AP3M1_HUMAN	AP3M1	AP-3 complex subunit mu-1	957.889	1082.77	905.889	913.96
Q9Y305;Q9Y305-2;Q9Y305-3;Q9Y305-4	Q9Y305;Q9Y305-2;Q9Y305-3;Q9Y305-4	ACOT9_HUMAN	ACOT9	Acyl-coenzyme A thioesterase 9, mitochondrial	1167.49	1534.33	1226.28	1411.33
Q9Y316;Q9Y316-2;Q9Y316-3	Q9Y316;Q9Y316-2;Q9Y316-3	MEMO1_HUMAN	MEMO1	Protein MEMO1	771.456	542.81	598.665	786.249
Q9Y333	Q9Y333	LSM2_HUMAN	LSM2	U6 snRNA-associated Sm-like protein LSm2	4586.85	4613.82	3899.07	4573.35
Q9Y365	Q9Y365	STA10_HUMAN	STARD10	START domain-containing protein 10	16733.4	15367.8	16503.8	13243
Q9Y3A5	Q9Y3A5	SBDS_HUMAN	SBDS	Ribosome maturation protein SBDS	522.544	1036.83	942.863	118.157
Q9Y3D8	Q9Y3D8	KAD6_HUMAN	AK6	Adenylate kinase isoenzyme 6	478.252	93.7465	530.023	479.463
Q9Y3E2	Q9Y3E2	BOLA1_HUMAN	BOLA1	BolA-like protein 1		3696.5	8179.43	16860.1
Q9Y3F4;Q9Y3F4-2	Q9Y3F4;Q9Y3F4-2	STRAP_HUMAN	STRAP	Serine-threonine kinase receptor-associated protein	1993.04	2204.54	2539.68	1749.31
Q9Y3I0	Q9Y3I0	RTCB_HUMAN	RTCB	RNA-splicing ligase RtcB homolog	2368.73	1990.02	1250.02	2466.3
Q9Y3U8	Q9Y3U8	RL36_HUMAN	RPL36	Large ribosomal subunit protein eL36	1736.3	1273.16	1011.28	2874.05
Q9Y450;Q9Y450-4	Q9Y450;Q9Y450-4	HBS1L_HUMAN	HBS1L	HBS1-like protein		254.821	333.192
Q9Y478	Q9Y478	AAKB1_HUMAN	PRKAB1	5'-AMP-activated protein kinase subunit beta-1	754.733	542.836	721.033
Q9Y4B6;Q9Y4B6-2;Q9Y4B6-3	Q9Y4B6;Q9Y4B6-3;Q9Y4B6-2	DCAF1_HUMAN	DCAF1	DDB1- and CUL4-associated factor 1	1240.57	1435.95	1183.22	977.533
Q9Y4E8;Q9Y4E8-2;Q9Y4E8-3	Q9Y4E8;Q9Y4E8-2;Q9Y4E8-3	UBP15_HUMAN	USP15	Ubiquitin carboxyl-terminal hydrolase 15	1984.51	2229.46	1899.99	1528.27
Q9Y4L1	Q9Y4L1;Q9Y4L1-2	HYOU1_HUMAN	HYOU1	Hypoxia up-regulated protein 1	2922.46	1690.51	1999.2	2830.73
Q9Y570;Q9Y570-2;Q9Y570-4	Q9Y570;Q9Y570-2;Q9Y570-4	PPME1_HUMAN	PPME1	Protein phosphatase methylesterase 1	1386.29	1113.67	1070.78	1670.07
Q9Y575;Q9Y575-2;Q9Y575-3	Q9Y575;Q9Y575-3;Q9Y575-2	ASB3_HUMAN	ASB3	Ankyrin repeat and SOCS box protein 3	611.579	945.844	733.193	988.861
Q9Y587	Q9Y587	AP4S1_HUMAN	AP4S1	AP-4 complex subunit sigma-1	1206.05	801.72	1175.7	785.118
Q9Y5A7;Q9Y5A7-2	Q9Y5A7;Q9Y5A7-2	NUB1_HUMAN	NUB1	NEDD8 ultimate buster 1		427.969		131.559
Q9Y5B9	Q9Y5B9	SP16H_HUMAN	SUPT16H	FACT complex subunit SPT16	319.165	261.511	361.144	446.384
Q9Y5K5;Q9Y5K5-2;Q9Y5K5-3;Q9Y5K5-4	Q9Y5K5;Q9Y5K5-2;Q9Y5K5-3;Q9Y5K5-4	UCHL5_HUMAN	UCHL5	Ubiquitin carboxyl-terminal hydrolase isozyme L5	27855.4	29390.2	31229.7
Q9Y5P6;Q9Y5P6-2	Q9Y5P6;Q9Y5P6-2	GMPPB_HUMAN	GMPPB	Mannose-1-phosphate guanyltransferase beta	2639.76	3112.73	2860.64	2067.24
Q9Y5Q9	Q9Y5Q9	TF3C3_HUMAN	GTF3C3	General transcription factor 3C polypeptide 3	454.266	135.539
Q9Y5T5;Q9Y5T5-2;Q9Y5T5-3	Q9Y5T5;Q9Y5T5-2;Q9Y5T5-3;Q9Y5T5-5	UBP16_HUMAN	USP16	Ubiquitin carboxyl-terminal hydrolase 16	4305.9	4702.45	4487.91	399.517
Q9Y606;Q9Y606-2	Q9Y606;Q9Y606-2	PUS1_HUMAN	PUS1	Pseudouridylate synthase 1 homolog	922.675	758.106	700.166	1106.78
Q9Y617	Q9Y617;Q9Y617-2	SERC_HUMAN	PSAT1	Phosphoserine aminotransferase	652.998	743.405	810.639	1369.31
Q9Y653;Q9Y653-2;Q9Y653-3;Q9Y653-4;Q9Y653-5	Q9Y653;Q9Y653-2;Q9Y653-3;Q9Y653-4;Q9Y653-5	AGRG1_HUMAN	ADGRG1	Adhesion G-protein coupled receptor G1	12379.1	10748.3	14041.8	19197.1
Q9Y678	Q9Y678	COPG1_HUMAN	COPG1	Coatomer subunit gamma-1	707.826	893.972	683.451	733.125
Q9Y697;Q9Y697-2	Q9Y697;Q9Y697-2	NFS1_HUMAN	NFS1	Cysteine desulfurase	676.96	550.076	456.954	810.149
Q9Y6I4	Q9Y6I4;Q9Y6I4-2	UBP3_HUMAN	USP3	Ubiquitin carboxyl-terminal hydrolase 3	1879.86	2515.73	1678.1
Q9Y6Q5-2	Q9Y6Q5;Q9Y6Q5-2	AP1M2_HUMAN	AP1M2	Isoform 2 of AP-1 complex subunit mu-2	4148.82	4086.72	4406.89	4042.72
Q9Y6Y8;Q9Y6Y8-2	Q9Y6Y8;Q9Y6Y8-2	S23IP_HUMAN	SEC23IP	SEC23-interacting protein	2663.26	1808.46	2067.17	1641.57

## Sheet: AGILENT BRAVO ABPP DUBS
Protein.Group	Protein.Ids	Protein.Names	Genes	First.Protein.Description	HA-Ub-PA 1	HA-Ub-PA 2	HA-UB-PA 3	No HA-Ub-PA
O75317	O75317	UBP12_HUMAN	USP12	Ubiquitin carboxyl-terminal hydrolase 12	1818.83		1473.28
O94966;O94966-3;O94966-4;O94966-5;O94966-6;O94966-7	O94966;O94966-3;O94966-4;O94966-5;O94966-6;O94966-7	UBP19_HUMAN	USP19	Ubiquitin carboxyl-terminal hydrolase 19	8718.06	8357.53	9542.01	303.475
P40818	P40818;P40818-2	UBP8_HUMAN	USP8	Ubiquitin carboxyl-terminal hydrolase 8	223883	241354	235663	11466.6
P45974-2	P45974;P45974-2	UBP5_HUMAN	USP5	Isoform Short of Ubiquitin carboxyl-terminal hydrolase 5	292961	334520	327567	8239.56
P51784	P51784	UBP11_HUMAN	USP11	Ubiquitin carboxyl-terminal hydrolase 11	5409.81	5630.04	5563.75
P54578	P54578;P54578-2;P54578-3	UBP14_HUMAN	USP14	Ubiquitin carboxyl-terminal hydrolase 14	117558	124120	128457	3127.52
P62068;P62068-4	P62068;P62068-2;P62068-3;P62068-4	UBP46_HUMAN	USP46	Ubiquitin carboxyl-terminal hydrolase 46	6723.58	8270.24	8349.93
Q13107;Q13107-2	Q13107;Q13107-2;Q13107-3	UBP4_HUMAN	USP4	Ubiquitin carboxyl-terminal hydrolase 4	24736.8	26428.4	25410.3	1109.35
Q14694;Q14694-2;Q14694-3	Q14694;Q14694-2;Q14694-3	UBP10_HUMAN	USP10	Ubiquitin carboxyl-terminal hydrolase 10	30951.9	31916.8	33001.8	1442.42
Q70CQ2;Q70CQ2-2	Q70CQ2;Q70CQ2-2;Q70CQ2-3	UBP34_HUMAN	USP34	Ubiquitin carboxyl-terminal hydrolase 34	6285.93	6338.66	6621.16	962.54
Q70EL2;Q70EL2-2	Q70EL2;Q70EL2-2	UBP45_HUMAN	USP45	Ubiquitin carboxyl-terminal hydrolase 45	507.323	448.567	660.768
Q70EL4;Q70EL4-4	Q70EL4;Q70EL4-4	UBP43_HUMAN	USP43	Ubiquitin carboxyl-terminal hydrolase 43	2118.17	1901.64	1658.49
Q86UV5	Q86UV5;Q86UV5-2;Q86UV5-3;Q86UV5-4;Q86UV5-7;Q86UV5-8	UBP48_HUMAN	USP48	Ubiquitin carboxyl-terminal hydrolase 48	6227.49	6415.07	6290.44	1379.46
Q8NB14	Q8NB14;Q8NB14-2	UBP38_HUMAN	USP38	Ubiquitin carboxyl-terminal hydrolase 38	3968.71	3634.03	3819.38
Q8NFA0	Q8NFA0	UBP32_HUMAN	USP32	Ubiquitin carboxyl-terminal hydrolase 32	43587.1	43714.7	43164.4	4967.1
Q92995;Q92995-2	Q92995;Q92995-2	UBP13_HUMAN	USP13	Ubiquitin carboxyl-terminal hydrolase 13	1052.32	1558.06	1073.33	828.112
Q93008;Q93008-3	O00507;Q93008;O00507-2;Q93008-3	USP9X_HUMAN	USP9X	Probable ubiquitin carboxyl-terminal hydrolase FAF-X	35865.8	37733.8	36352.6	1803.22
Q93009;Q93009-3	Q93009;Q93009-3	UBP7_HUMAN	USP7	Ubiquitin carboxyl-terminal hydrolase 7	142302	145939	144136	4133.98
Q96K76;Q96K76-4	Q96K76;Q96K76-2;Q96K76-4	UBP47_HUMAN	USP47	Ubiquitin carboxyl-terminal hydrolase 47	14251	14847.3	14884.7	2781.23
Q96RU2;Q96RU2-2	Q96RU2;Q96RU2-2;Q96RU2-3	UBP28_HUMAN	USP28	Ubiquitin carboxyl-terminal hydrolase 28	10386.9	10374.4	12646
Q9NVE5;Q9NVE5-3	Q9NVE5;Q9NVE5-3	UBP40_HUMAN	USP40	Ubiquitin carboxyl-terminal hydrolase 40	2920.85	3155.66	2780.92
Q9P2H5	Q9P2H5;Q9P2H5-2	UBP35_HUMAN	USP35	Ubiquitin carboxyl-terminal hydrolase 35	952.763	547.684	841.586
Q9UHP3;Q9UHP3-1;Q9UHP3-3	Q9UHP3;Q9UHP3-1;Q9UHP3-3	UBP25_HUMAN	USP25	Ubiquitin carboxyl-terminal hydrolase 25	2390.52	1873.02	1971.57
Q9UPT9;Q9UPT9-2	Q9UPT9;Q9UPT9-2	UBP22_HUMAN	USP22	Ubiquitin carboxyl-terminal hydrolase 22	3913.03	3443.42	3578.88	1978.24
Q9UPU5	Q9UPU5	UBP24_HUMAN	USP24	Ubiquitin carboxyl-terminal hydrolase 24	8903	9328.04	9041.52	911.671
Q9Y4E8;Q9Y4E8-2;Q9Y4E8-3	Q9Y4E8;Q9Y4E8-2;Q9Y4E8-3	UBP15_HUMAN	USP15	Ubiquitin carboxyl-terminal hydrolase 15	1984.51	2229.46	1899.99	1528.27
Q9Y5T5;Q9Y5T5-2;Q9Y5T5-3	Q9Y5T5;Q9Y5T5-2;Q9Y5T5-3;Q9Y5T5-5	UBP16_HUMAN	USP16	Ubiquitin carboxyl-terminal hydrolase 16	4305.9	4702.45	4487.91	399.517
Q9Y6I4	Q9Y6I4;Q9Y6I4-2	UBP3_HUMAN	USP3	Ubiquitin carboxyl-terminal hydrolase 3	1879.86	2515.73	1678.1
Q96AP4;Q96AP4-2	Q96AP4;Q96AP4-2	ZUP1_HUMAN	ZUP1	Zinc finger-containing ubiquitin peptidase 1		388.923
Q01804	Q01804;Q01804-3;Q01804-5	OTUD4_HUMAN	OTUD4	OTU domain-containing protein 4	1887.85	1503.32	1284.86
Q6GQQ9;Q6GQQ9-2	Q6GQQ9;Q6GQQ9-2	OTU7B_HUMAN	OTUD7B	OTU domain-containing protein 7B	9331.27	10374.5	10071.1	16828.4
Q8N6M0	Q8N6M0;Q8N6M0-2	OTU6B_HUMAN	OTUD6B	Deubiquitinase OTUD6B	3214.49	4179.75	3728.71
Q96DC9	Q96DC9	OTUB2_HUMAN	OTUB2	Ubiquitin thioesterase OTUB2	4783.94	4983.51	5092.63	5564.59
Q96FW1	Q96FW1;Q96FW1-2	OTUB1_HUMAN	OTUB1	Ubiquitin thioesterase OTUB1	73733.5	76928.9	70928.1	1759.53
Q96JH7	Q96JH7	VCIP1_HUMAN	VCPIP1	Deubiquitinating protein VCPIP1	4799	4810.43	4447.12
Q92560	Q92560	BAP1_HUMAN	BAP1	Ubiquitin carboxyl-terminal hydrolase BAP1	1150.78	982.448	667.311
P15374	P15374	UCHL3_HUMAN	UCHL3	Ubiquitin carboxyl-terminal hydrolase isozyme L3	5446.29	4939.48	5877.64
Q9Y5K5;Q9Y5K5-2;Q9Y5K5-3;Q9Y5K5-4	Q9Y5K5;Q9Y5K5-2;Q9Y5K5-3;Q9Y5K5-4	UCHL5_HUMAN	UCHL5	Ubiquitin carboxyl-terminal hydrolase isozyme L5	27855.4	29390.2	31229.7
Q504Q3;Q504Q3-2;Q504Q3-3	Q504Q3;Q504Q3-2;Q504Q3-3	PAN2_HUMAN	PAN2	PAN2-PAN3 deadenylation complex catalytic subunit PAN2	360.599		375.562

## Sheet: ON BENCH ABPP PG
Protein.Group	Protein.Ids	Protein.Names	Genes	First.Protein.Description	HA-Ub-PA 1	HA-Ub-PA 2	HA-Ub-PA 3	No HA-Ub-PA
A0A075B6H7;A0A0C4DH55;P01624	P01624;A0A075B6H7;A0A0C4DH55	KV315_HUMAN;KV37_HUMAN;KVD07_HUMAN	IGKV3-15;IGKV3-7;IGKV3D-7	Probable non-functional immunoglobulin kappa variable 3-7	25658	21795.2	23274.1	32599.6
A0A075B6K2;A0A075B6K5;P80748	P80748;A0A075B6K2;A0A075B6K5	LV312_HUMAN;LV321_HUMAN;LV39_HUMAN	IGLV3-12;IGLV3-21;IGLV3-9	Immunoglobulin lambda variable 3-12	3287.24	2998.61	3331.44	3998.4
A0A075B6S2;A0A0A0MRZ7;A2NJV5	A0A075B6S2;A0A0A0MRZ7;A2NJV5	KV229_HUMAN;KVD26_HUMAN;KVD29_HUMAN	IGKV2-29;IGKV2D-26;IGKV2D-29	Immunoglobulin kappa variable 2D-29	3294.78	4051.42	2973.92	5707.33
A0A087WSY6	A0A087WSY6	KVD15_HUMAN	IGKV3D-15	Immunoglobulin kappa variable 3D-15	10651.8	9947.98	9023.37	6597.56
A0A0A0MS14	A0A0A0MS14	HV145_HUMAN	IGHV1-45	Immunoglobulin heavy variable 1-45	81152	82011	64368.9	88217.4
A0A0A0MT36;A0A0C4DH26	A0A0A0MT36;A0A0C4DH26	KVD21_HUMAN;KVD41_HUMAN	IGKV6D-21;IGKV6D-41	Immunoglobulin kappa variable 6D-21	993.728	578.297	1096.11	832.543
A0A0B4J1V0	A0A0A0MS15;A0A0B4J1V0;A0A0B4J1V6;A0A0B4J1Y9	HV315_HUMAN	IGHV3-15	Immunoglobulin heavy variable 3-15	3632.1	3139.87	4521.88	3713.33
A0A0B4J1V1;A0A0B4J1X5;A0A0C4DH32;P01762;P01763;P01780;P01782	P01780;P01762;P01763;P01782;A0A0B4J1V1;A0A0B4J1X5;A0A0C4DH32	HV307_HUMAN;HV309_HUMAN;HV311_HUMAN;HV320_HUMAN;HV321_HUMAN;HV348_HUMAN;HV374_HUMAN	IGHV3-11;IGHV3-20;IGHV3-21;IGHV3-48;IGHV3-7;IGHV3-74;IGHV3-9	Immunoglobulin heavy variable 3-21	1573.6	786.299	1052.03	1535.39
A0A0B4J2D5;P0DPI2	A0A0B4J2D5;P0DPI2	GAL3A_HUMAN;GAL3B_HUMAN	GATD3;GATD3B	Putative glutamine amidotransferase-like class 1 domain-containing protein 3B, mitochondrial	981.979	1539.33	806.425	1044.42
A0A0J9YX35	A0A0J9YX35	HV64D_HUMAN	IGHV3-64D	Immunoglobulin heavy variable 3-64D	55550.2	53301	50324.6	58197.2
A0A1W2PR48	A0A1W2PR48	TLE7_HUMAN	TLE7	Transducin-like enhancer protein 7	2127.1
A0AV96;A0AV96-2	A0AV96;A0AV96-2	RBM47_HUMAN	RBM47	RNA-binding protein 47	1723.3	1689.92	1177.7	1030.19
A0AVT1	A0AVT1;A0AVT1-2	UBA6_HUMAN	UBA6	Ubiquitin-like modifier-activating enzyme 6	4201.15	4396.53	4249.05	3597.54
A0FGR8-6	A0FGR8;A0FGR8-2;A0FGR8-5;A0FGR8-6	ESYT2_HUMAN	ESYT2	Isoform 6 of Extended synaptotagmin-2	4397.66	3258.74	4380.64	3520.13
A1L0T0	A1L0T0	HACL2_HUMAN	ILVBL	2-hydroxyacyl-CoA lyase 2	2389.67	1910.54	1541.09	1955.48
A2RUC4	A2RUC4	TYW5_HUMAN	TYW5	tRNA wybutosine-synthesizing protein 5	1826.27	2426.27	2012.16	2028.02
A3KMH1;A3KMH1-2;A3KMH1-3	A3KMH1;A3KMH1-2;A3KMH1-3	VWA8_HUMAN	VWA8	von Willebrand factor A domain-containing protein 8	1180.24	771.861	1010.65	1135.63
A3KN83;A3KN83-2;A3KN83-3	Q9Y2G9;A3KN83;A3KN83-2;A3KN83-3;A3KN83-4;Q9Y2G9-3	SBNO1_HUMAN	SBNO1	Protein strawberry notch homolog 1	1533.52	2153.47	2551.96	2298.1
A5YKK6;A5YKK6-2	A5YKK6;A5YKK6-2	CNOT1_HUMAN	CNOT1	CCR4-NOT transcription complex subunit 1	3695.16	3453.54	4186.32	3816.26
A6NDG6	A6NDG6	PGP_HUMAN	PGP	Glycerol-3-phosphate phosphatase	2796.88	2403.1	3759.75	2860.11
A6NHR9;A6NHR9-2	A6NHR9;A6NHR9-2;A6NHR9-3	SMHD1_HUMAN	SMCHD1	Structural maintenance of chromosomes flexible hinge domain-containing protein 1	840.604	958.378	1331.47	1232.49
A6NHX0	A6NHX0	CAST2_HUMAN	CASTOR2	Cytosolic arginine sensor for mTORC1 subunit 2	1408.59	1335.49	1438.54	933.752
A6NIH7;Q13432;Q13432-2	A6NIH7;Q13432;Q13432-2	U119A_HUMAN;U119B_HUMAN	UNC119;UNC119B	Protein unc-119 homolog B	3537.28	2234.93	2709.81	2006.98
A6NIZ1;P61224;P61224-3;P61224-4	P61224;A6NIZ1;P61224-3;P61224-4	RAP1B_HUMAN;RP1BL_HUMAN	RAP1B;RAP1BL	Ras-related protein Rap-1b-like protein		586.47	381.718
A8MWD9;P62308	P62308;A8MWD9	RUXGL_HUMAN;RUXG_HUMAN	SNRPG;SNRPGP15	Putative small nuclear ribonucleoprotein G-like protein 15	1684.74	3435.55	1584.96	3063.51
B2RPK0;P09429;P26583	P09429;P26583;B2RPK0	HGB1A_HUMAN;HMGB1_HUMAN;HMGB2_HUMAN	HMGB1;HMGB1P1;HMGB2	Putative high mobility group protein B1-like 1	1537.63		713.968	3212.56
B5ME19;Q99613;Q99613-2	Q99613;B5ME19;Q99613-2	EIF3C_HUMAN;EIFCL_HUMAN	EIF3C;EIF3CL	Eukaryotic translation initiation factor 3 subunit C-like protein	9432.84	6196.94	8970.99	6632.38
B7ZAQ6;B7ZAQ6-2;B7ZAQ6-3;P0CG08	B7ZAQ6;P0CG08;B7ZAQ6-2;B7ZAQ6-3	GPHRA_HUMAN;GPHRB_HUMAN	GPR89A;GPR89B	Golgi pH regulator A	1315.62	1222.78	1348.2	948.574
E9PAV3;E9PAV3-2;Q13765	Q13765;E9PAV3;E9PAV3-2	NACAM_HUMAN;NACA_HUMAN	NACA	Nascent polypeptide-associated complex subunit alpha, muscle-specific form	11464.6	14585.9	11989.6	13243.2
E9PRG8	E9PRG8	CK098_HUMAN	C11orf98	Uncharacterized protein C11orf98	1568.72	1534.24	1662.79	1699.85
O00139;O00139-1;O00139-2;O00139-4;O00139-5	O00139;O00139-1;O00139-2;O00139-4;O00139-5	KIF2A_HUMAN	KIF2A	Kinesin-like protein KIF2A	2030.59	2288.06	2096.31	2149
O00148	O00148;O00148-2;O00148-3	DX39A_HUMAN	DDX39A	ATP-dependent RNA helicase DDX39A	47796.8	44719.3	47715.9	52042.6
O00154;O00154-4;O00154-6;O00154-7	O00154;O00154-4;O00154-2;O00154-3;O00154-5;O00154-6;O00154-7	BACH_HUMAN	ACOT7	Cytosolic acyl coenzyme A thioester hydrolase	11662.6	12373.1	10796.5	10844.5
O00159;O00159-3	O00159;O00159-3;O00159-2	MYO1C_HUMAN	MYO1C	Unconventional myosin-Ic	17141.4	16737.5	16706.1	15893.2
O00170	O00170	AIP_HUMAN	AIP	AH receptor-interacting protein	2828.67	2543.27	3756.95	2765.8
O00186	O00186	STXB3_HUMAN	STXBP3	Syntaxin-binding protein 3	4322.64	4206.4	3663.5	3481.77
O00203;O00203-3	O00203;O00203-3	AP3B1_HUMAN	AP3B1	AP-3 complex subunit beta-1	4998.14	4643.31	5158.6	5573.24
O00204;O00204-2	O00204;O00204-2	ST2B1_HUMAN	SULT2B1	Sulfotransferase 2B1	2880.43	2607.15	3191.75	3423.09
O00212	O00212	RHOD_HUMAN	RHOD	Rho-related GTP-binding protein RhoD	1881.41	1180.64	676.003	992.606
O00214;O00214-2	O00214;O00214-2	LEG8_HUMAN	LGALS8	Galectin-8	3617.49	2445.7	1588.01	2833.37
O00217	O00217	NDUS8_HUMAN	NDUFS8	NADH dehydrogenase [ubiquinone] iron-sulfur protein 8, mitochondrial		642.024	699.487
O00231;O00231-2	O00231;O00231-2	PSD11_HUMAN	PSMD11	26S proteasome non-ATPase regulatory subunit 11	4956.36	2267.05	4380.69	3376.07
O00232	O00232;O00232-2	PSD12_HUMAN	PSMD12	26S proteasome non-ATPase regulatory subunit 12	5195.28	4357.07	6560.33	4896.8
O00233;O00233-3	O00233;O00233-3	PSMD9_HUMAN	PSMD9	26S proteasome non-ATPase regulatory subunit 9	726.268	415.489	395.893	891.106
O00267;O00267-2	O00267;O00267-2	SPT5H_HUMAN	SUPT5H	Transcription elongation factor SPT5	2580.6	2448.27	2312.69	2240.93
O00299	O00299	CLIC1_HUMAN	CLIC1	Chloride intracellular channel protein 1	11963	10050.9	11265.7	10193.6
O00303	O00303	EIF3F_HUMAN	EIF3F	Eukaryotic translation initiation factor 3 subunit F	6526.09	6201.36	6428.5	7086.82
O00308;O00308-2;O00308-3;Q96J02;Q96J02-2;Q96J02-3;Q9H0M0;Q9H0M0-3;Q9H0M0-6	O00308;Q96J02;Q9H0M0;Q96J02-2;O00308-2;O00308-3;Q96J02-3;Q9H0M0-3;Q9H0M0-6	ITCH_HUMAN;WWP1_HUMAN;WWP2_HUMAN	ITCH;WWP1;WWP2	NEDD4-like E3 ubiquitin-protein ligase WWP2	3558.17	2512.68	3634.15	2040.28
O00410;O00410-3	O00410;O00410-2;O00410-3	IPO5_HUMAN	IPO5	Importin-5	2114.83	1680.31	2143.71	1815.1
O00418	O00418	EF2K_HUMAN	EEF2K	Eukaryotic elongation factor 2 kinase	1355.2	1211.56	925.302	968.062
O00429;O00429-2;O00429-3;O00429-4;O00429-5;O00429-6;O00429-8;O00429-9	O00429;O00429-2;O00429-3;O00429-4;O00429-5;O00429-6;O00429-7;O00429-8;O00429-9	DNM1L_HUMAN	DNM1L	Dynamin-1-like protein	1756.28	1267.91	1836.25	1307.82
O00442;O00442-2	O00442;O00442-2	RTCA_HUMAN	RTCA	RNA 3'-terminal phosphate cyclase	1780.31	1441.49	1551.35	2151.91
O00443	O00443;O00443-2	P3C2A_HUMAN	PIK3C2A	Phosphatidylinositol 4-phosphate 3-kinase C2 domain-containing subunit alpha	1455.58	971.291	1825.6	832.062
O00461	O00461	GOLI4_HUMAN	GOLIM4	Golgi integral membrane protein 4	2133.71	854.632	1604.24	1631.82
O00483	O00483	NDUA4_HUMAN	NDUFA4	Cytochrome c oxidase subunit NDUFA4	5323.77	4798.19	4523.42	4850.33
O00487	O00487	PSDE_HUMAN	PSMD14	26S proteasome non-ATPase regulatory subunit 14	11686.3	11604.6	12430.8	15041.5
O00505	O00505;O00629	IMA4_HUMAN	KPNA3	Importin subunit alpha-4	1024.76	869.394	518.438	844.553
O00571;O00571-2	O00571;O15523;Q9NQI0;O00571-2;O15523-2;Q9NQI0-2;Q9NQI0-3;Q9NQI0-4	DDX3X_HUMAN	DDX3X	ATP-dependent RNA helicase DDX3X	7775.42	7641.07	8414.91	7329.11
O00625	O00625	PIR_HUMAN	PIR	Pirin	1952.1	2319.01	2062.47	2195.71
O00712;O00712-2;O00712-4;O00712-5;P08651;P08651-2;P08651-3;P08651-4;P08651-5;P08651-6;Q12857;Q12857-2;Q12857-3;Q12857-4;Q14938;Q14938-2;Q14938-3;Q14938-4;Q14938-5;Q14938-6	O00712;P08651;Q12857;Q14938;Q14938-5;O00712-2;O00712-4;O00712-5;P08651-2;P08651-3;P08651-4;P08651-5;P08651-6;Q12857-2;Q12857-3;Q12857-4;Q14938-2;Q14938-3;Q14938-4;Q14938-6	NFIA_HUMAN;NFIB_HUMAN;NFIC_HUMAN;NFIX_HUMAN	NFIA;NFIB;NFIC;NFIX	Nuclear factor 1 B-type	2340.02	2445.02	1640.49	1648.86
O00743;O00743-2;O00743-3	O00743;O00743-2;O00743-3	PPP6_HUMAN	PPP6C	Serine/threonine-protein phosphatase 6 catalytic subunit	3980.18	4340.07	4060.32	5420.98
O00757	O00757	F16P2_HUMAN	FBP2	Fructose-1,6-bisphosphatase isozyme 2	14014.3	14447.5	11790.8	17991.1
O00764;O00764-2	O00764;O00764-2	PDXK_HUMAN	PDXK	Pyridoxal kinase	1081.12	1035.06	1023.09	1039.31
O00767	O00767	SCD_HUMAN	SCD	Stearoyl-CoA desaturase	5619.54	3515.11	6810.77	3978.55
O14519;O14519-2;O75956	O14519;O75956;O14519-2	CDKA1_HUMAN;CDKA2_HUMAN	CDK2AP1;CDK2AP2	Cyclin-dependent kinase 2-associated protein 1				558.499
O14530;O14530-2	O14530;O14530-2	TXND9_HUMAN	TXNDC9	Thioredoxin domain-containing protein 9	795.109	749.906	1485.14	1368.76
O14559;O14559-10;O14559-11	O14559;O14559-10;O14559-11	RHG33_HUMAN	ARHGAP33	Rho GTPase-activating protein 33	881.055	1023.88		738.502
O14617;O14617-4;O14617-5	O14617;O14617-2;O14617-3;O14617-4;O14617-5	AP3D1_HUMAN	AP3D1	AP-3 complex subunit delta-1	2043.25	1903.75	2540.43	2126.92
O14646;O14646-2;O14647;O14647-2;Q3L8U1;Q3L8U1-2;Q3L8U1-3;Q8TD26;Q9HCK8;Q9HCK8-2;Q9P2D1	O14646;O14647;Q3L8U1;Q8TD26;Q9HCK8;Q9P2D1;Q3L8U1-3;O14646-2;O14647-2;Q3L8U1-2;Q9HCK8-2	CHD1_HUMAN;CHD2_HUMAN;CHD6_HUMAN;CHD7_HUMAN;CHD8_HUMAN;CHD9_HUMAN	CHD1;CHD2;CHD6;CHD7;CHD8;CHD9	Chromodomain-helicase-DNA-binding protein 1	1950.41	1122.34	1823.4	1273.14
O14656	O14656	TOR1A_HUMAN	TOR1A	Torsin-1A	1235.77	1064.39	1379.06	1468.24
O14672	O14672	ADA10_HUMAN	ADAM10	Disintegrin and metalloproteinase domain-containing protein 10	759.864	904.486	896.031	1325.96
O14734	O14734	ACOT8_HUMAN	ACOT8	Acyl-coenzyme A thioesterase 8	517.188	553.708	645.319	498.55
O14735;O14735-3	O14735;O14735-3	CDIPT_HUMAN	CDIPT	CDP-diacylglycerol--inositol 3-phosphatidyltransferase	4534.95	5015.43	4582.16	4128.32
O14737	O14737	PDCD5_HUMAN	PDCD5	Programmed cell death protein 5	780.478		769.581	813.324
O14744	O14744;O14744-2;O14744-3;O14744-4;O14744-5	ANM5_HUMAN	PRMT5	Protein arginine N-methyltransferase 5	19329.8	27224.5	20113.5	23043.1
O14745	O14745;O14745-2	NHRF1_HUMAN	NHERF1	Na(+)/H(+) exchange regulatory cofactor NHE-RF1	1271.47	935.502	1183.96	4707.3
O14776;O14776-2	O14776;O14776-2	TCRG1_HUMAN	TCERG1	Transcription elongation regulator 1	2094.85	951.677	1394.63	1212.51
O14787-2	O14787-2;Q92973;Q92973-2;Q92973-3	TNPO2_HUMAN	TNPO2	Isoform 2 of Transportin-2	2585.95	1954.4	2707.39	1671.68
O14802	O14802	RPC1_HUMAN	POLR3A	DNA-directed RNA polymerase III subunit RPC1	3214.9	3372.55	3256.2	4180.14
O14818	O14818;O14818-2	PSA7_HUMAN	PSMA7	Proteasome subunit alpha type-7	10014	13919.4	10913.3	15007.8
O14828	O14828;O14828-2	SCAM3_HUMAN	SCAMP3	Secretory carrier-associated membrane protein 3	9473.87	9790.12	8778.02	10103.9
O14880	O14880	MGST3_HUMAN	MGST3	Glutathione S-transferase 3, mitochondrial	905.667	785.225	700.461	520.505
O14925	O14925;Q5SRD1;Q5SRD1-2	TIM23_HUMAN	TIMM23	Mitochondrial import inner membrane translocase subunit Tim23	2010.93	2115.32	1969.45	1984.27
O14929	O14929;O14929-2	HAT1_HUMAN	HAT1	Histone acetyltransferase type B catalytic subunit	14039.3	10687.4	11890.9	12023.7
O14950;P19105	O14950;P19105	ML12A_HUMAN;ML12B_HUMAN	MYL12A;MYL12B	Myosin regulatory light chain 12B	1388.72	1258.08	1615.46	2418.96
O14974;O14974-2;O14974-3;O14974-4;O14974-5	O14974;O14974-2;O14974-3;O14974-4;O14974-5	MYPT1_HUMAN	PPP1R12A	Protein phosphatase 1 regulatory subunit 12A	624.148	1535.11	1221.51	2175.51
O14975;O14975-2	O14975;O14975-2	S27A2_HUMAN	SLC27A2	Long-chain fatty acid transport protein 2	2573.87	2423.93	2307.73	2062.41
O14976	O14976;O14976-2	GAK_HUMAN	GAK	Cyclin-G-associated kinase	2433.64	2664.85	2839.86	2775.07
O14980	O14980	XPO1_HUMAN	XPO1	Exportin-1	3635.59	2296.04	3360.89	2948.31
O15020;O15020-2	O15020;O15020-2	SPTN2_HUMAN	SPTBN2	Spectrin beta chain, non-erythrocytic 2	960.504	1025.32	948.741	777.11
O15042;O15042-2	O15042;O15042-2	SR140_HUMAN	U2SURP	U2 snRNP-associated SURP motif-containing protein	2360.58	2198.33	2309.91	2171.54
O15067	O15067	PUR4_HUMAN	PFAS	Phosphoribosylformylglycinamidine synthase	6977	7064.1	6881.43	7088.69
O15084;O15084-1;O15084-4	O15084;O15084-1;O15084-2;O15084-4	ANR28_HUMAN	ANKRD28	Serine/threonine-protein phosphatase 6 regulatory ankyrin repeat subunit A	519.498	720.713	711.368	455.048
O15091;O15091-2;O15091-4	O15091;O15091-2;O15091-4	MRPP3_HUMAN	PRORP	Mitochondrial ribonuclease P catalytic subunit	440.814	842.496	464.285	470.867
O15143	O15143	ARC1B_HUMAN	ARPC1B	Actin-related protein 2/3 complex subunit 1B	13136.1	11646.1	11271.4	11028.5
O15144	O15144	ARPC2_HUMAN	ARPC2	Actin-related protein 2/3 complex subunit 2	15221.9	15045.6	13774.2	12943.2
O15145	O15145	ARPC3_HUMAN	ARPC3	Actin-related protein 2/3 complex subunit 3	2747.4	4727.66	3538.67	3454.91
O15160	O15160;O15160-2	RPAC1_HUMAN	POLR1C	DNA-directed RNA polymerases I and III subunit RPAC1	3887.27	3483.02	4502.51	5265.36
O15198;O15198-2;P84022;P84022-2;P84022-3;P84022-4;Q15796;Q15796-2;Q15797;Q99717	O15198;P84022;Q15796;Q15797;Q99717;O15198-2;P84022-2;P84022-3;P84022-4;Q15796-2	SMAD1_HUMAN;SMAD2_HUMAN;SMAD3_HUMAN;SMAD5_HUMAN;SMAD9_HUMAN	SMAD1;SMAD2;SMAD3;SMAD5;SMAD9	Mothers against decapentaplegic homolog 9	1382.31	2044.43	1320	1654.08
O15226;O15226-2	O15226;O15226-2	NKRF_HUMAN	NKRF	NF-kappa-B-repressing factor	1472.79	1001.81	1151.28	1011.41
O15258	O15258	RER1_HUMAN	RER1	Protein RER1	1760.66	2032.54	2036.32	1700.22
O15260;O15260-2	O15260;O15260-2	SURF4_HUMAN	SURF4	Surfeit locus protein 4	7014.14	10986.6	8537.46	10342.6
O15264	O15264	MK13_HUMAN	MAPK13	Mitogen-activated protein kinase 13	1698.12	1083.4	1411.02	1317.74
O15269	O15269	SPTC1_HUMAN	SPTLC1	Serine palmitoyltransferase 1	2053.37	2482.48	2086.15	2940.94
O15270	O15270	SPTC2_HUMAN	SPTLC2	Serine palmitoyltransferase 2	375.211	1312.41		1540.59
O15294;O15294-2;O15294-3;O15294-4	O15294;O15294-2;O15294-3;O15294-4	OGT1_HUMAN	OGT	UDP-N-acetylglucosamine--peptide N-acetylglucosaminyltransferase 110 kDa subunit	2709.88	1602.6	1855.19	2337.3
O15305	O15305	PMM2_HUMAN	PMM2	Phosphomannomutase 2	1173.3	1581.86	1369.26	1743.5
O15321;O15321-2	O15321;O15321-2	TM9S1_HUMAN	TM9SF1	Transmembrane 9 superfamily member 1	1491.61	1299.8	1437.86	1039.66
O15327	O15327	INP4B_HUMAN	INPP4B	Inositol polyphosphate 4-phosphatase type II	3822.98	4016.34	3247.17	4455.78
O15355	O15355	PPM1G_HUMAN	PPM1G	Protein phosphatase 1G	2442.81	2896.19	3223.09	3524.04
O15357	O15357;O15357-2	SHIP2_HUMAN	INPPL1	Phosphatidylinositol 3,4,5-trisphosphate 5-phosphatase 2	2541.73	2964.42	2723.99	2600.71
O15371;O15371-2;O15371-3	O15371;O15371-2;O15371-3	EIF3D_HUMAN	EIF3D	Eukaryotic translation initiation factor 3 subunit D	7914.39	9608.67	8612.4	10122.9
O15372	O15372	EIF3H_HUMAN	EIF3H	Eukaryotic translation initiation factor 3 subunit H	12524.8	12694.9	11104	14453.4
O15379;O15379-2	O15379;O15379-2	HDAC3_HUMAN	HDAC3	Histone deacetylase 3	1561.35	1687.97	1205.6	1392.86
O15397	O15397	IPO8_HUMAN	IPO8	Importin-8	1344.9	603.959	869.899	740.457
O15427	O15427	MOT4_HUMAN	SLC16A3	Monocarboxylate transporter 4	1658.46	2480.82	1468.99	1252.21
O15498;O15498-2	O15498;O15498-2	YKT6_HUMAN	YKT6	Synaptobrevin homolog YKT6	1833.48	2419.48	2543.4	2682.14
O15551	O14493;O15551;O95484;P56747	CLD3_HUMAN	CLDN3	Claudin-3	3842.09	3148.46	3928.12	3842.47
O43143	O43143;O60231;Q14562	DHX15_HUMAN	DHX15	ATP-dependent RNA helicase DHX15	11573.5	10555.5	11674.8	9611.94
O43148;O43148-2	O43148;O43148-2	MCES_HUMAN	RNMT	mRNA cap guanine-N7 methyltransferase	4352.08	5639.43	5128.09	5533.01
O43156	O43156	TTI1_HUMAN	TTI1	TELO2-interacting protein 1 homolog	1259.54	1110.68	992.001	964.609
O43172;O43172-2	O43172;O43172-2	PRP4_HUMAN	PRPF4	U4/U6 small nuclear ribonucleoprotein Prp4	6393.69	7976.19	6823.25	6168.72
O43175	O43175	SERA_HUMAN	PHGDH	D-3-phosphoglycerate dehydrogenase	18751.5	17270.5	22619.2	18267.1
O43237;O43237-2	O43237;O43237-2	DC1L2_HUMAN	DYNC1LI2	Cytoplasmic dynein 1 light intermediate chain 2	2760.41	1960.13	2424.49	2590.12
O43242	O43242;O43242-2	PSMD3_HUMAN	PSMD3	26S proteasome non-ATPase regulatory subunit 3	9720.95	9266.3	9442.72	9349.3
O43252	O43252	PAPS1_HUMAN	PAPSS1	Bifunctional 3'-phosphoadenosine 5'-phosphosulfate synthase 1	4244.98	4601.73	4712.1	4390.75
O43278;O43278-2	O43278;O43278-2	SPIT1_HUMAN	SPINT1	Kunitz-type protease inhibitor 1	4778.05	4166.44	4044.52	4426.88
O43281;O43281-2;O43281-3	O43281;O43281-2;O43281-3	EFS_HUMAN	EFS	Embryonal Fyn-associated substrate			369.802	2538.19
O43292	O43292;O43292-2	GPAA1_HUMAN	GPAA1	Glycosylphosphatidylinositol anchor attachment 1 protein	529.839		528.187	715.865
O43314;O43314-2	O43314;O43314-2	VIP2_HUMAN	PPIP5K2	Inositol hexakisphosphate and diphosphoinositol-pentakisphosphate kinase 2	864.318	909.522	438.013	311.905
O43324	O43324	MCA3_HUMAN	EEF1E1	Eukaryotic translation elongation factor 1 epsilon-1	2619.64	2045.15	2942.88	2610.31
O43353;O43353-2	O43353;O43353-2	RIPK2_HUMAN	RIPK2	Receptor-interacting serine/threonine-protein kinase 2	803.497	655.308	544.355	1699.42
O43390;O43390-2;O43390-4	O43390;O43390-2;O43390-3;O43390-4	HNRPR_HUMAN	HNRNPR	Heterogeneous nuclear ribonucleoprotein R	3309.44	2943.74	3604.69	3582.78
O43395	O43395	PRPF3_HUMAN	PRPF3	U4/U6 small nuclear ribonucleoprotein Prp3	1775.19	1878.61	2895.05	1289.18
O43396	O43396	TXNL1_HUMAN	TXNL1	Thioredoxin-like protein 1	6780.3	7804.61	6827.23	7788.95
O43414;O43414-2;O43414-3	O43414;O43414-2;O43414-3	ERI3_HUMAN	ERI3	ERI1 exoribonuclease 3	2716.72	1753.28	1690.93	1568.77
O43427;O43427-2	O43427;O43427-2	FIBP_HUMAN	FIBP	Acidic fibroblast growth factor intracellular-binding protein	1225.05	724.221	895.326	1492.51
O43447;O43447-2	O43447;O43447-2	PPIH_HUMAN	PPIH	Peptidyl-prolyl cis-trans isomerase H	3656.88	3952.81	3830.98	5407.26
O43464;O43464-2;O43464-3	O43464;O43464-2;O43464-3	HTRA2_HUMAN	HTRA2	Serine protease HTRA2, mitochondrial	1102.98	891.521	853.218	1066.94
O43488	O43488	ARK72_HUMAN	AKR7A2	Aflatoxin B1 aldehyde reductase member 2	1332.77	2069.07	1638.25	2223.34
O43570;O43570-2	O43570;O43570-2	CAH12_HUMAN	CA12	Carbonic anhydrase 12	3168.79	2588.84	2197.79	3234.3
O43572	O43572	AKA10_HUMAN	AKAP10	A-kinase anchor protein 10, mitochondrial	803.358	910.979	696.484	981.728
O43592	O43592	XPOT_HUMAN	XPOT	Exportin-T	12052.2	12013.9	11844.5	12360.9
O43615	O43615	TIM44_HUMAN	TIMM44	Mitochondrial import inner membrane translocase subunit TIM44	3264.27	3239.43	2986.53	3130.58
O43681	O43681	GET3_HUMAN	GET3	ATPase GET3	14630.5	15363.3	14915.2	17942.6
O43684;O43684-2	O43684;O43684-2	BUB3_HUMAN	BUB3	Mitotic checkpoint protein BUB3	12366.2	13919	11512.5	12885
O43707	O43707;O43707-2;O43707-3	ACTN4_HUMAN	ACTN4	Alpha-actinin-4	33212.5	20770.5	34642.2	32076.7
O43719	O43719	HTSF1_HUMAN	HTATSF1	HIV Tat-specific factor 1	3226.11	2903.9	3381.55	3720.93
O43739;O43739-2;Q15438;Q15438-2;Q15438-3;Q99418;Q99418-2	O43739;Q15438;Q99418;O43739-2;Q15438-2;Q15438-3;Q99418-2	CYH1_HUMAN;CYH2_HUMAN;CYH3_HUMAN	CYTH1;CYTH2;CYTH3	Cytohesin-3	2127.84	1007.99	1390.06	1113.87
O43741;O43741-2;Q9Y478	O43741;Q9Y478;O43741-2	AAKB1_HUMAN;AAKB2_HUMAN	PRKAB1;PRKAB2	5'-AMP-activated protein kinase subunit beta-2	889.14	605.307	940.365	835.386
O43747;O43747-2	O43747;O43747-2	AP1G1_HUMAN	AP1G1	AP-1 complex subunit gamma-1	10068.3	9397.42	9239.94	9517.75
O43772	O43772	MCAT_HUMAN	SLC25A20	Mitochondrial carnitine/acylcarnitine carrier protein	1362.62	923.128	1234.32	1405.7
O43776	O43776;O43776-2	SYNC_HUMAN	NARS1	Asparagine--tRNA ligase, cytoplasmic	18454.6	22661.1	20847.7	22733.3
O43795;O43795-2	O43795;O43795-2	MYO1B_HUMAN	MYO1B	Unconventional myosin-Ib	3453.2	3591.92	4350.25	3233.9
O43813	O43813	LANC1_HUMAN	LANCL1	Glutathione S-transferase LANCL1	2257.37	1645.85	2038.8	1494.05
O43815;O43815-2	O43815;O43815-2	STRN_HUMAN	STRN	Striatin	491.723	443.275	399.709
O43837	O43837;O43837-2	IDH3B_HUMAN	IDH3B	Isocitrate dehydrogenase [NAD] subunit beta, mitochondrial	1003.06	945.871	1252.6	1449.4
O43847;O43847-2	O43847;O43847-2	NRDC_HUMAN	NRDC	Nardilysin	2007.24	2065.07	2721.01	2850.52
O43865	O43865;Q96HN2;O43865-2;Q96HN2-2;Q96HN2-3;Q96HN2-4	SAHH2_HUMAN	AHCYL1	S-adenosylhomocysteine hydrolase-like protein 1	9603.26	8734.51	9496.84	8385.97
O60216	O60216	RAD21_HUMAN	RAD21	Double-strand-break repair protein rad21 homolog	769.492	863.819	998.032	967.363
O60231	O60231	DHX16_HUMAN	DHX16	Pre-mRNA-splicing factor ATP-dependent RNA helicase DHX16	5556.06	5927.38	5545.13	4663.02
O60256;O60256-3	O60256;O60256-2;O60256-3;O60256-4	KPRB_HUMAN	PRPSAP2	Phosphoribosyl pyrophosphate synthase-associated protein 2	2291.46	2431.48	3198.96	3100.67
O60264	O60264;P28370;P28370-2	SMCA5_HUMAN	SMARCA5	SWI/SNF-related matrix-associated actin-dependent regulator of chromatin subfamily A member 5	2941.67	2695.69	2979.32	2619.06
O60271;O60271-3;O60271-4;O60271-5;O60271-9	O60271;O60271-3;O60271-5;O60271-4;O60271-9	JIP4_HUMAN	SPAG9	C-Jun-amino-terminal kinase-interacting protein 4	751.16	486.945	460.965	719.408
O60313;O60313-10;O60313-11;O60313-13;O60313-2;O60313-9	O60313;O60313-10;O60313-2;O60313-9;O60313-11;O60313-13	OPA1_HUMAN	OPA1	Dynamin-like 120 kDa protein, mitochondrial	1637.59	1375.53	1453.1	2052.89
O60333;O60333-2;O60333-4	O43896;O60333;O60333-2;Q12756;O60333-3;O60333-4;Q12756-2;Q12756-3	KIF1B_HUMAN	KIF1B	Kinesin-like protein KIF1B	3243.03	2981.93	3601.9	2828.68
O60341;O60341-2	O60341;O60341-2	KDM1A_HUMAN	KDM1A	Lysine-specific histone demethylase 1A	4828.3	4871.03	3993.08	5258.66
O60469;O60469-2	O60469;O60469-2	DSCAM_HUMAN	DSCAM	Cell adhesion molecule DSCAM		858.18	1006.7	839.605
O60488;O60488-2	O60488;O60488-2	ACSL4_HUMAN	ACSL4	Long-chain-fatty-acid--CoA ligase 4		2229.77
O60493;O60493-3;O60493-4	O60493;O60493-3;O60493-4	SNX3_HUMAN	SNX3	Sorting nexin-3	1334.67	1463.86	1814.1	1814.6
O60502;O60502-2;O60502-4	O60502;O60502-2;O60502-4	OGA_HUMAN	OGA	Protein O-GlcNAcase	3619.01	5573.82	4143.93	4457.75
O60506;O60506-2;O60506-3;O60506-4	O43390;O60506;O60506-4;O43390-2;O43390-4;O60506-2;O60506-3	HNRPQ_HUMAN	SYNCRIP	Heterogeneous nuclear ribonucleoprotein Q	5536.07	3593.78	5782.39	4556.91
O60524;O60524-3;O60524-4;O60524-5	O60524;O60524-2;O60524-3;O60524-4;O60524-5	NEMF_HUMAN	NEMF	Ribosome quality control complex subunit NEMF	2201.11	2126.47	1716.54	1775.56
O60547;O60547-2	O60547;O60547-2	GMDS_HUMAN	GMDS	GDP-mannose 4,6 dehydratase	1296.06	1789.45	1147.96	1569.53
O60563	O60563;O60563-2	CCNT1_HUMAN	CCNT1	Cyclin-T1		2114.09	1829.92	1872.61
O60568	O60568	PLOD3_HUMAN	PLOD3	Multifunctional procollagen lysine hydroxylase and glycosyltransferase LH3	4419.68	5414.08	5220.89	4414.36
O60610;O60610-2;O60610-3	O60610;O60610-2;O60610-3	DIAP1_HUMAN	DIAPH1	Protein diaphanous homolog 1	4284.45	4335.79	4962.7	4091.7
O60678	O60678;O60678-2	ANM3_HUMAN	PRMT3	Protein arginine N-methyltransferase 3	551.907	757.651	676.165	783.558
O60684	O60684	IMA7_HUMAN	KPNA6	Importin subunit alpha-7	5330.89	5206.12	6419.15	5448.02
O60701	O60701;O60701-2;O60701-3	UGDH_HUMAN	UGDH	UDP-glucose 6-dehydrogenase	6292.19	6241.95	6209.63	7040.78
O60716;O60716-10;O60716-11;O60716-12;O60716-13;O60716-14;O60716-15;O60716-16;O60716-17;O60716-18;O60716-19;O60716-2;O60716-20;O60716-21;O60716-22;O60716-23;O60716-24;O60716-25;O60716-26;O60716-27;O60716-28;O60716-29;O60716-3;O60716-30;O60716-31;O60716-32;O60716-4;O60716-5;O60716-6;O60716-7;O60716-8;O60716-9	O60716;O60716-10;O60716-11;O60716-12;O60716-13;O60716-14;O60716-15;O60716-16;O60716-17;O60716-18;O60716-19;O60716-2;O60716-20;O60716-21;O60716-22;O60716-23;O60716-24;O60716-25;O60716-26;O60716-27;O60716-28;O60716-29;O60716-3;O60716-30;O60716-31;O60716-32;O60716-4;O60716-5;O60716-6;O60716-7;O60716-8;O60716-9	CTND1_HUMAN	CTNND1	Catenin delta-1	2667.66	1667.31	1571.32	1591.85
O60749	O60749;Q13596;O60749-2;Q13596-2	SNX2_HUMAN	SNX2	Sorting nexin-2	4756.56	4827.28	5087.7	5025.1
O60762	O60762	DPM1_HUMAN	DPM1	Dolichol-phosphate mannosyltransferase subunit 1	3391.99	3971.29	3603.86	3410.32
O60763;O60763-2	O60763;O60763-2	USO1_HUMAN	USO1	General vesicular transport factor p115	2550.25	1387.39	2141.54	1378.4
O60783	O60783	RT14_HUMAN	MRPS14	Small ribosomal subunit protein uS14m	790.978	1363.96	553.815	1626.18
O60814;P06899;P23527;P33778;P57053;P58876;P62807;Q16778;Q5QNW6;Q5QNW6-2;Q8N257;Q93079;Q99877;Q99879;Q99880	O60814;P06899;P23527;P33778;P57053;P58876;P62807;Q16778;Q5QNW6;Q8N257;Q93079;Q96A08;Q99877;Q99879;Q99880;Q5QNW6-2	H2B1B_HUMAN;H2B1C_HUMAN;H2B1D_HUMAN;H2B1H_HUMAN;H2B1J_HUMAN;H2B1K_HUMAN;H2B1L_HUMAN;H2B1M_HUMAN;H2B1N_HUMAN;H2B1O_HUMAN;H2B2E_HUMAN;H2B2F_HUMAN;H2B3B_HUMAN;H2BFS_HUMAN	H2BC11;H2BC12;H2BC12L;H2BC13;H2BC14;H2BC15;H2BC17;H2BC18;H2BC21;H2BC26;H2BC3;H2BC4;H2BC5;H2BC9	Histone H2B type 1-K	1889.81	832.501	900.69	913.117
O60841	O60841	IF2P_HUMAN	EIF5B	Eukaryotic translation initiation factor 5B	3160.15	2950.49	3086.12	3045.68
O60884	O60884	DNJA2_HUMAN	DNAJA2	DnaJ homolog subfamily A member 2	921.81	718.619	880.859	1095.42
O60941;O60941-2;O60941-3;O60941-4;O60941-5;O60941-6;O60941-7;Q9Y4J8;Q9Y4J8-10;Q9Y4J8-11;Q9Y4J8-12;Q9Y4J8-13;Q9Y4J8-14;Q9Y4J8-15;Q9Y4J8-16;Q9Y4J8-17;Q9Y4J8-2;Q9Y4J8-3;Q9Y4J8-4;Q9Y4J8-5;Q9Y4J8-6;Q9Y4J8-8	O60941;O60941-5;Q9Y4J8;Q9Y4J8-10;Q9Y4J8-11;Q9Y4J8-12;Q9Y4J8-13;Q9Y4J8-14;Q9Y4J8-15;Q9Y4J8-16;Q9Y4J8-17;Q9Y4J8-2;Q9Y4J8-3;Q9Y4J8-4;Q9Y4J8-5;Q9Y4J8-6;Q9Y4J8-8;O60941-2;O60941-3;O60941-4;O60941-6;O60941-7	DTNA_HUMAN;DTNB_HUMAN	DTNA;DTNB	Dystrobrevin beta	4642.14	4085.26	3587.82	4134.3
O60942;O60942-2;O60942-3;O60942-4	O60942;O60942-2;O60942-3;O60942-4	MCE1_HUMAN	RNGTT	mRNA-capping enzyme	720.032	818.857	888.536	589.463
O75054	O75054;O75054-2	IGSF3_HUMAN	IGSF3	Immunoglobulin superfamily member 3	1116.96	1835.35	1354.05	1514.58
O75063	O75063	XYLK_HUMAN	FAM20B	Glycosaminoglycan xylosylkinase	2395.34	1398.78	1807.33	1884.16
O75083	O75083	WDR1_HUMAN	WDR1	WD repeat-containing protein 1	27616.2	34376	26656.6	35293.7
O75116	O75116	ROCK2_HUMAN	ROCK2	Rho-associated protein kinase 2	2405.14	2251.07	2016.13	2355.82
O75131	O75131	CPNE3_HUMAN	CPNE3	Copine-3	23912.5	31231.2	24480.1	28159.5
O75153	O75153	CLU_HUMAN	CLUH	Clustered mitochondria protein homolog	4904.74	5670.36	5172.01	5059.67
O75165	O75165	DJC13_HUMAN	DNAJC13	DnaJ homolog subfamily C member 13	1120.49	1133.39	1290.87	1183.83
O75179;O75179-2;O75179-6;O75179-7	O75179;Q8IWZ3;O75179-2;O75179-6;O75179-7;Q8IWZ3-4;Q8IWZ3-6	ANR17_HUMAN	ANKRD17	Ankyrin repeat domain-containing protein 17	1241.51	1252.39	634.28	898.963
O75190;O75190-2;O75190-3	O75190;O75190-2;O75190-3	DNJB6_HUMAN	DNAJB6	DnaJ homolog subfamily B member 6	5020.36	4246.16	4070.77	4896.06
O75191;O75191-2	O75191;O75191-2	XYLB_HUMAN	XYLB	Xylulose kinase	408.581	821.304	782.892	882.592
O75223	O75223;O75223-3	GGCT_HUMAN	GGCT	Gamma-glutamylcyclotransferase	7824.19	10261.1	7230.08	8891.23
O75251;O75251-2	O75251;O75251-2	NDUS7_HUMAN	NDUFS7	NADH dehydrogenase [ubiquinone] iron-sulfur protein 7, mitochondrial	4276.19	4614.81	4397.04	4451.83
O75306;O75306-2	O75306;O75306-2	NDUS2_HUMAN	NDUFS2	NADH dehydrogenase [ubiquinone] iron-sulfur protein 2, mitochondrial	4152.13	5275.41	4117.79	8332.46
O75312	O75312	ZPR1_HUMAN	ZPR1	Zinc finger protein ZPR1	364.802	1106.41		953.325
O75317	O75317	UBP12_HUMAN	USP12	Ubiquitin carboxyl-terminal hydrolase 12	1913.72	2417.6	1212.08
O75340;O75340-2	O75340;O75340-2	PDCD6_HUMAN	PDCD6	Programmed cell death protein 6	1190.47	1010.09	1344.53	1125.93
O75351	O75351	VPS4B_HUMAN	VPS4B	Vacuolar protein sorting-associated protein 4B	5100.34	5738.26	5699.03	6037.03
O75369;O75369-2;O75369-3;O75369-6;O75369-8;O75369-9	O75369;O75369-2;O75369-3;O75369-6;O75369-4;O75369-5;O75369-7;O75369-8;O75369-9	FLNB_HUMAN	FLNB	Filamin-B	6954.59	6307.39	8047.52	7607.47
O75382;O75382-2;O75382-4	O75382;O75382-2;O75382-4	TRIM3_HUMAN	TRIM3	Tripartite motif-containing protein 3	2393.12	2006.52	2518.54	2462.47
O75390	O75390	CISY_HUMAN	CS	Citrate synthase, mitochondrial	17009.5	20263.7	22636	22651.5
O75396	O75396	SC22B_HUMAN	SEC22B	Vesicle-trafficking protein SEC22b	910.917	962.931	1604.87	1336.55
O75400;O75400-2;O75400-3	O75400;O75400-2;O75400-3	PR40A_HUMAN	PRPF40A	Pre-mRNA-processing factor 40 homolog A	1514.32	2309.01	1815.61	1771.63
O75436	O75436	VP26A_HUMAN	VPS26A	Vacuolar protein sorting-associated protein 26A	19323.8	17690.3	18901.8	18523.5
O75439	O75439	MPPB_HUMAN	PMPCB	Mitochondrial-processing peptidase subunit beta	8408.7	7865.23	8217.81	8006.35
O75489;O75489-2	O75489;O75489-2	NDUS3_HUMAN	NDUFS3	NADH dehydrogenase [ubiquinone] iron-sulfur protein 3, mitochondrial	1851.89	1728.05	2067.13	1637.06
O75530;O75530-2;O75530-3	O75530;O75530-2;O75530-3	EED_HUMAN	EED	Polycomb protein EED	396.743	798.96	584.168	423.163
O75531	O75531	BAF_HUMAN	BANF1	Barrier-to-autointegration factor		463.575	173.552	527.026
O75533	O75533	SF3B1_HUMAN	SF3B1	Splicing factor 3B subunit 1	2929.76	2925.03	3326.95	2709.89
O75534;O75534-2;O75534-3;O75534-4	O75534;O75534-2;O75534-3;O75534-4	CSDE1_HUMAN	CSDE1	Cold shock domain-containing protein E1	9894.08	9611.02	8424.59	9842.71
O75569;O75569-2;O75569-3	O75569;O75569-2;O75569-3	PRKRA_HUMAN	PRKRA	Interferon-inducible double-stranded RNA-dependent protein kinase activator A	1706.5	1741.67	1552.07	1764.35
O75582	O75582;O75582-2	KS6A5_HUMAN	RPS6KA5	Ribosomal protein S6 kinase alpha-5	639.688		605.114	298.201
O75608;O75608-2	O75608;O75608-2	LYPA1_HUMAN	LYPLA1	Acyl-protein thioesterase 1	2772.23	3943.84	5173.37	4162.41
O75643	O75643;O75643-2	U520_HUMAN	SNRNP200	U5 small nuclear ribonucleoprotein 200 kDa helicase	6105.16	6888.06	6243.99	5856.07
O75663;O75663-2	O75663;O75663-2	TIPRL_HUMAN	TIPRL	TIP41-like protein	847.973	910.63	1142.05	1390.29
O75688	O75688;O75688-2;O75688-4;O75688-5	PPM1B_HUMAN	PPM1B	Protein phosphatase 1B	2815.7	2816.26	3078.61	2508.52
O75694;O75694-2	O75694;O75694-2	NU155_HUMAN	NUP155	Nuclear pore complex protein Nup155	324.32	456.512	387.141	613.864
O75717	O75717	WDHD1_HUMAN	WDHD1	WD repeat and HMG-box DNA-binding protein 1	2276.14	3312.9	2660.74	2453.48
O75746;O75746-2	O75746;O75746-2	S2512_HUMAN	SLC25A12	Electrogenic aspartate/glutamate antiporter SLC25A12, mitochondrial	1660.52	1919.93	2314.03	1611.02
O75817	O75817	POP7_HUMAN	POP7	Ribonuclease P protein subunit p20	973.117	433.738	1138.38	835.278
O75818;O75818-2	O75818;O75818-2	RPP40_HUMAN	RPP40	Ribonuclease P protein subunit p40		471.549	999.268	525.43
O75821	O75821	EIF3G_HUMAN	EIF3G	Eukaryotic translation initiation factor 3 subunit G	2769.79	5059.97	3909.5	5250.85
O75822;O75822-2;O75822-3	O75822;O75822-2;O75822-3	EIF3J_HUMAN	EIF3J	Eukaryotic translation initiation factor 3 subunit J	2516.2		1620.92	1437.3
O75844	O75844	FACE1_HUMAN	ZMPSTE24	CAAX prenyl protease 1 homolog	1226.85	675.343	1122.94	951.459
O75864	O75864	PPR37_HUMAN	PPP1R37	Protein phosphatase 1 regulatory subunit 37		357.159	431.813	485.363
O75874	O75874	IDHC_HUMAN	IDH1	Isocitrate dehydrogenase [NADP] cytoplasmic	13364.3	15584.2	15349.8	18042
O75915	O75915	PRAF3_HUMAN	ARL6IP5	PRA1 family protein 3	2247.08	1548.61	1645.21	1566.17
O75955	O75955;O75955-2	FLOT1_HUMAN	FLOT1	Flotillin-1	4118.31	3870.95	3735.38	3481.89
O75964	O75964	ATP5L_HUMAN	ATP5MG	ATP synthase subunit g, mitochondrial	6468.05	3965.44	6440.89	4006.54
O76021	O76021	RL1D1_HUMAN	RSL1D1	Ribosomal L1 domain-containing protein 1	1642.17	2606.93	2143.7	1490.7
O76031	O76031	CLPX_HUMAN	CLPX	ATP-dependent Clp protease ATP-binding subunit clpX-like, mitochondrial	2438.52	1371.17	2666.32	1967.94
O76062	O76062;O76062-2	ERG24_HUMAN	TM7SF2	Delta(14)-sterol reductase TM7SF2	713.476	556.689	491.312
O76071	O76071	CIAO1_HUMAN	CIAO1	Probable cytosolic iron-sulfur protein assembly protein CIAO1	3685.43	4819.06	3607.54	4183.9
O76094;O76094-2	O76094;O76094-2	SRP72_HUMAN	SRP72	Signal recognition particle subunit SRP72	1626.26	1007.94	1404.19	1407.23
O94776	O94776;O94776-2	MTA2_HUMAN	MTA2	Metastasis-associated protein MTA2	4894.22	5417.23	4988.31	5089.99
O94782	O94782	UBP1_HUMAN	USP1	Ubiquitin carboxyl-terminal hydrolase 1	3768.36	3836.97	3408.19
O94822;O94822-3	O94822;O94822-3	LTN1_HUMAN	LTN1	E3 ubiquitin-protein ligase listerin	519.36	865.674	1384.23	916.385
O94832	O94832	MYO1D_HUMAN	MYO1D	Unconventional myosin-Id	1785.85	1529.54	1859.71	1239.21
O94855;O94855-2	O94855;O94855-2	SC24D_HUMAN	SEC24D	Protein transport protein Sec24D	1049.84	557.872	763.571	892.017
O94874;O94874-2;O94874-3	O94874;O94874-2;O94874-3	UFL1_HUMAN	UFL1	E3 UFM1-protein ligase 1	211.544		564.08
O94903	O94903	PLPHP_HUMAN	PLPBP	Pyridoxal phosphate homeostasis protein	1419.47	1409.93	1038.35	1095.17
O94905	O94905	ERLN2_HUMAN	ERLIN2	Erlin-2	5781.02	5584.13	5317.21	5410.48
O94906;O94906-2	O94906;O94906-2	PRP6_HUMAN	PRPF6	Pre-mRNA-processing factor 6	2986.48	3125.62	3441.1	2835.33
O94925;O94925-3	O94925;O94925-3	GLSK_HUMAN	GLS	Glutaminase kidney isoform, mitochondrial	927.408		1585.68	898.516
O94966-5	O94966;O94966-3;O94966-4;O94966-5;O94966-6;O94966-7	UBP19_HUMAN	USP19	Isoform 5 of Ubiquitin carboxyl-terminal hydrolase 19	38655.7	36338.8	33102.6	2839.5
O94973;O94973-2	O94973;O94973-2	AP2A2_HUMAN	AP2A2	AP-2 complex subunit alpha-2	2600.78	2483.58	3137.47	3154.58
O94979;O94979-10;O94979-2;O94979-3;O94979-4;O94979-6;O94979-7;O94979-8;O94979-9	O94979;O94979-10;O94979-2;O94979-3;O94979-4;O94979-5;O94979-6;O94979-7;O94979-8;O94979-9	SC31A_HUMAN	SEC31A	Protein transport protein Sec31A	7779.92	7553.89	8017.95	6058.15
O95059	O95059	RPP14_HUMAN	RPP14	Ribonuclease P protein subunit p14	297.682	363.753	287.384	722.77
O95071;O95071-2	O95071;O95071-2	UBR5_HUMAN	UBR5	E3 ubiquitin-protein ligase UBR5	4897.24	4923.87	5206.81	4052.91
O95104;O95104-2;O95104-3;Q9UPN6;Q9UPN6-2	O95104;Q9UPN6;O95104-2;O95104-3;Q9UPN6-2	SCAF4_HUMAN;SCAF8_HUMAN	SCAF4;SCAF8	SR-related and CTD-associated factor 4		376.148
O95163	O95163	ELP1_HUMAN	ELP1	Elongator complex protein 1	2279.08	1411.97	2046.97	1682.66
O95164	O95164	UBL3_HUMAN	UBL3	Ubiquitin-like protein 3	654.633	1393.33	1641.46	1182.34
O95218;O95218-2	O95218;O95218-2	ZRAB2_HUMAN	ZRANB2	Zinc finger Ran-binding domain-containing protein 2	2796.26	2072.72	1966.27	2619.08
O95239;O95239-2	O95239;O95239-2	KIF4A_HUMAN	KIF4A	Chromosome-associated kinesin KIF4A	1018.4	1428.61	1364.19	1436.38
O95299;O95299-2	O95299;O95299-2	NDUAA_HUMAN	NDUFA10	NADH dehydrogenase [ubiquinone] 1 alpha subcomplex subunit 10, mitochondrial	1435.75	1394.33	978.418	852.868
O95336	O95336	6PGL_HUMAN	PGLS	6-phosphogluconolactonase	1521.91	1107.85	1883.19	1929.02
O95340;O95340-2	O95340;O95340-2	PAPS2_HUMAN	PAPSS2	Bifunctional 3'-phosphoadenosine 5'-phosphosulfate synthase 2	1604.03	1203.28	1484.93	1378.12
O95347	O95347;O95347-2	SMC2_HUMAN	SMC2	Structural maintenance of chromosomes protein 2	4551.51	5394.94	4767.33	4592.33
O95352;O95352-3	O95352;O95352-2;O95352-3	ATG7_HUMAN	ATG7	Ubiquitin-like modifier-activating enzyme ATG7	2433.16	2035.24	2702.61	2144.14
O95361	O95361	TRI16_HUMAN	TRIM16	Tripartite motif-containing protein 16	708.873	649.409	825.497	1142.19
O95363	O95363	SYFM_HUMAN	FARS2	Phenylalanine--tRNA ligase, mitochondrial	2013.62	1479.8	2431.79	1594.35
O95373	O95373	IPO7_HUMAN	IPO7	Importin-7	5176.64	2744.79	5282.06	3764.35
O95396	O95396	MOCS3_HUMAN	MOCS3	Adenylyltransferase and sulfurtransferase MOCS3	1102.17	1054.17		1023.94
O95433;O95433-2	O95433;O95433-2	AHSA1_HUMAN	AHSA1	Activator of 90 kDa heat shock protein ATPase homolog 1	37503.8	36557.1	38535.9	35369.5
O95456;O95456-2	O95456;O95456-2	PSMG1_HUMAN	PSMG1	Proteasome assembly chaperone 1	12986.2	9887.33	10934.9	9044.27
O95470	O95470	SGPL1_HUMAN	SGPL1	Sphingosine-1-phosphate lyase 1	2258.18	2142.25	1772.16	1557.88
O95471;O95471-2	O95471;O95471-2	CLD7_HUMAN	CLDN7	Claudin-7			256.951	399.817
O95486	O95486;O95486-2	SC24A_HUMAN	SEC24A	Protein transport protein Sec24A	740.671	1519.68	1119.7	1087.39
O95487;O95487-2;O95487-3	O95487;O95487-2;O95487-3	SC24B_HUMAN	SEC24B	Protein transport protein Sec24B	2181.24	1545.34	1476.25	2201.06
O95551;O95551-2	O95551;O95551-2	TYDP2_HUMAN	TDP2	Tyrosyl-DNA phosphodiesterase 2	2716.86	2400.8	2503.24	1550.06
O95573	O95573	ACSL3_HUMAN	ACSL3	Fatty acid CoA ligase Acsl3	4052	3200.94	4012.12	3770.74
O95671;O95671-2;O95671-3	O95671;O95671-2;O95671-3	ASML_HUMAN	ASMTL	Probable bifunctional dTTP/UTP pyrophosphatase/methyltransferase protein	319.789	487.55	483.961	704.183
O95685	O95685	PPR3D_HUMAN	PPP1R3D	Protein phosphatase 1 regulatory subunit 3D	1581.78	1431.38	1455.99	1134.81
O95707	O95707	RPP29_HUMAN	POP4	Ribonuclease P protein subunit p29	1143.33	1255.98	1095.54	1097.13
O95714	O95714	HERC2_HUMAN	HERC2	E3 ubiquitin-protein ligase HERC2	827.768	1070	884.63	474.184
O95716	O95716;P20337;Q96E17	RAB3D_HUMAN	RAB3D	Ras-related protein Rab-3D	12081	13029.4	10381.4	13830.5
O95747	O95747	OXSR1_HUMAN	OXSR1	Serine/threonine-protein kinase OSR1	1740.34	1736.89	1339.58	2030.86
O95757	O95757	HS74L_HUMAN	HSPA4L	Heat shock 70 kDa protein 4L	5356.71	6284.21	6417	5873.15
O95758;O95758-1;O95758-2;O95758-4;O95758-5;O95758-6;O95758-7	O95758;O95758-1;O95758-2;O95758-4;O95758-5;O95758-6;O95758-7	PTBP3_HUMAN	PTBP3	Polypyrimidine tract-binding protein 3	1476.51	1273.23	1110.97
O95782;O95782-2	O94973;O95782;O94973-2;O94973-3;O95782-2	AP2A1_HUMAN	AP2A1	AP-2 complex subunit alpha-1	5812.6	6251.13	6106.23	5432.37
O95793;O95793-2	O95793;O95793-2;O95793-3	STAU1_HUMAN	STAU1	Double-stranded RNA-binding protein Staufen homolog 1	1517.93	1746.96	1518.98	1676.07
O95816	O95816	BAG2_HUMAN	BAG2	BAG family molecular chaperone regulator 2	802.36	1296.13	1326.13	873.482
O95817	O95817	BAG3_HUMAN	BAG3	BAG family molecular chaperone regulator 3	1054.45		953.887	1480.35
O95822;O95822-2	O95822;O95822-2	DCMC_HUMAN	MLYCD	Malonyl-CoA decarboxylase, mitochondrial	1205.4	1552.63	1041.08	1650.52
O95831;O95831-3	O95831;O95831-3;O95831-5;O95831-2	AIFM1_HUMAN	AIFM1	Apoptosis-inducing factor 1, mitochondrial	6710.58	8251.06	6391.42	6598.48
O95834;O95834-2;O95834-3	O95834;O95834-2;O95834-3	EMAL2_HUMAN	EML2	Echinoderm microtubule-associated protein-like 2	1568.89	1837.48	1510.75	1749.36
O95861;O95861-4	O95861;O95861-3;O95861-4	BPNT1_HUMAN	BPNT1	3'(2'),5'-bisphosphate nucleotidase 1	2037.14	2587.8	2099.36	2494.27
O95870;O95870-2	O95870;O95870-2	ABHGA_HUMAN	ABHD16A	Phosphatidylserine lipase ABHD16A	1736.78	1964.68	1761.28	1378.45
O95970;O95970-2;O95970-3	O95970;O95970-2;O95970-3	LGI1_HUMAN	LGI1	Leucine-rich glioma-inactivated protein 1	5525.56	3805.49	3397.98	10067.8
O95989	O95989	NUDT3_HUMAN	NUDT3	Diphosphoinositol polyphosphate phosphohydrolase 1	1191.47	1832.76	714.44	899.063
O96000;O96000-2	O96000;O96000-2	NDUBA_HUMAN	NDUFB10	NADH dehydrogenase [ubiquinone] 1 beta subcomplex subunit 10	319.527	419.954	506.175	457.119
O96005;O96005-3;O96005-4	O96005;O96005-3;O96005-4	CLPT1_HUMAN	CLPTM1	Putative lipid scramblase CLPTM1	974.865	1458.03	1440.66	2087.35
O96007	O96007	MOC2B_HUMAN	MOCS2	Molybdopterin synthase catalytic subunit	1169.24	1044.32	1320.41	560.691
O96008	O96008	TOM40_HUMAN	TOMM40	Mitochondrial import receptor subunit TOM40 homolog	6063	6062.34	6882.06	7038.88
O96013;O96013-2;O96013-3;O96013-4	O96013;O96013-2;O96013-3;O96013-4	PAK4_HUMAN	PAK4	Serine/threonine-protein kinase PAK 4	2745.06	3177.46	3367.05	2492.93
O96017;O96017-12;O96017-13;O96017-4;O96017-9	O96017;O96017-12;O96017-13;O96017-4;O96017-9	CHK2_HUMAN	CHEK2	Serine/threonine-protein kinase Chk2	1650.7	1879.82	2502.45	2473.59
O96019;O96019-2	O96019;O96019-2	ACL6A_HUMAN	ACTL6A	Actin-like protein 6A	2995.96	4942.47	4274.7	4485.01
O96028;O96028-2;O96028-4	O96028;O96028-4;O96028-2	NSD2_HUMAN	NSD2	Histone-lysine N-methyltransferase NSD2	174.988			767.804
P00338;P00338-3	P00338;P00338-3;P00338-4	LDHA_HUMAN	LDHA	L-lactate dehydrogenase A chain	36381.2	36459.1	37576.4	34419.9
P00367	P00367;P49448;P00367-3	DHE3_HUMAN	GLUD1	Glutamate dehydrogenase 1, mitochondrial	11032.4	10602.8	10918.9	12020.2
P00374	P00374	DYR_HUMAN	DHFR	Dihydrofolate reductase	11462.8	10630.5	9164.54	10318.3
P00387;P00387-2;P00387-3	P00387;P00387-2;P00387-3	NB5R3_HUMAN	CYB5R3	NADH-cytochrome b5 reductase 3	303277	281397	260179	314142
P00390;P00390-2;P00390-3	P00390;P00390-2;P00390-3;P00390-4;P00390-5	GSHR_HUMAN	GSR	Glutathione reductase, mitochondrial	12681.8	14881.9	14114.7	13335.1
P00395	P00395	COX1_HUMAN	MT-CO1	Cytochrome c oxidase subunit 1	3142.37	4464.86	3778.43	4973.44
P00403	P00403	COX2_HUMAN	MT-CO2	Cytochrome c oxidase subunit 2	37097.8	39398.4	32528.7	36215.7
P00491	P00491	PNPH_HUMAN	PNP	Purine nucleoside phosphorylase	9865.84	12660.4	9743.48	11072
P00492	P00492	HPRT_HUMAN	HPRT1	Hypoxanthine-guanine phosphoribosyltransferase	5397.51	6455.84	5326.28	6220.07
P00505	P00505;P00505-2	AATM_HUMAN	GOT2	Aspartate aminotransferase, mitochondrial	5922.32	7160.51	6287.58	7450.92
P00558	P00558;P00558-2	PGK1_HUMAN	PGK1	Phosphoglycerate kinase 1	12072.9	12777	13224.9	13917.1
P00568	P00568	KAD1_HUMAN	AK1	Adenylate kinase isoenzyme 1	3904.69	3991.55	4718.65	5010.1
P00736	P00736	C1R_HUMAN	C1R	Complement C1r subcomponent	1071.35	760.833	919.614	841.434
P00846	P00846	ATP6_HUMAN	MT-ATP6	ATP synthase subunit a	5419.1	4778.05	5567.03	4049.1
P00966	P00966	ASSY_HUMAN	ASS1	Argininosuccinate synthase	29797.5	30081.9	27824.2	26516.1
P01024	P01024	CO3_HUMAN	C3	Complement C3	17459.6	16824.2	15283.8	18526.7
P01111	P01111;P01112	RASN_HUMAN	NRAS	GTPase NRas	27981.5	28750.2	21510.2	26808.7
P01116-2	P01116-2	RASK_HUMAN	KRAS	Isoform 2B of GTPase KRas	565.535	1300.92	756.312	1128.05
P01619	P01619	KV320_HUMAN	IGKV3-20	Immunoglobulin kappa variable 3-20	5034.73	3704.09	2748.31	3348.11
P01859;P01859-1	P01859;P01859-1	IGHG2_HUMAN	IGHG2	Immunoglobulin heavy constant gamma 2	128128	118346	107523	134953
P01860;P01860-1	P01860;P01860-1	IGHG3_HUMAN	IGHG3	Immunoglobulin heavy constant gamma 3	6404.6	3935.29	2555.4	5084.77
P02042;P02100;P68871;P69891;P69892	P02042;P02100;P68871;P69891;P69892	HBB_HUMAN;HBD_HUMAN;HBE_HUMAN;HBG1_HUMAN;HBG2_HUMAN	HBB;HBD;HBE1;HBG1;HBG2	Hemoglobin subunit delta	5374.56	5228.84	4935.23	4668.55
P02533	P02533;P08779	K1C14_HUMAN	KRT14	Keratin, type I cytoskeletal 14	1532.06	4030.8	1736.69	1290.65
P02538;P04259;P48668	P02538;P04259;P48668	K2C6A_HUMAN;K2C6B_HUMAN;K2C6C_HUMAN	KRT6A;KRT6B;KRT6C	Keratin, type II cytoskeletal 6A		1007.7	1846.54
P02545;P02545-2;P02545-4;P02545-5;P02545-6	P02545;P02545-2;P02545-3;P02545-4;P02545-5;P02545-6	LMNA_HUMAN	LMNA	Prelamin-A/C	650.32	337.985	321.106	567.464
P02679;P02679-2	P02679;P02679-2	FIBG_HUMAN	FGG	Fibrinogen gamma chain	1589.85	1265.84	1136.26	1707.19
P02745	P02745	C1QA_HUMAN	C1QA	Complement C1q subcomponent subunit A	93583.4	95565.2	80099.8	99833.1
P02746	P02746	C1QB_HUMAN	C1QB	Complement C1q subcomponent subunit B	64931.9	73477.9	64886.6	92262
P02768	P02768;P02768-3	ALBU_HUMAN	ALB	Albumin	5249.77	4680.34	4966.35	5637.9
P02786	P02786	TFR1_HUMAN	TFRC	Transferrin receptor protein 1	18887.1	23725.5	18931.2	23193.6
P02788;P02788-2	P02788;P02788-2	TRFL_HUMAN	LTF	Lactotransferrin	2847.5	2609.14	2412.78	2968.16
P03891	P03891	NU2M_HUMAN	MT-ND2	NADH-ubiquinone oxidoreductase chain 2	729.776	1117.14	911.227	438.515
P04075	P04075;P09972;P04075-2	ALDOA_HUMAN	ALDOA	Fructose-bisphosphate aldolase A	32008	48794.1	35670.9	46311.1
P04181	P04181;P04181-2	OAT_HUMAN	OAT	Ornithine aminotransferase, mitochondrial	1669.65	1166.9	1593.14	1773.06
P04183	P04183	KITH_HUMAN	TK1	Thymidine kinase, cytosolic	2717.39	2735.91	2741.64	2848.64
P04264	P04259;P04264	K2C1_HUMAN	KRT1	Keratin, type II cytoskeletal 1	19601.4	109913	30440.2	40732.6
P04406;P04406-2	P04406;P04406-2	G3P_HUMAN	GAPDH	Glyceraldehyde-3-phosphate dehydrogenase	478329	639233	486995	555862
P04792	P04792	HSPB1_HUMAN	HSPB1	Heat shock protein beta-1	110052	99221	102621	121364
P04843	P04843	RPN1_HUMAN	RPN1	Dolichyl-diphosphooligosaccharide--protein glycosyltransferase subunit 1	13195.2	14382.4	11807.7	12834.2
P04844;P04844-2	P04844;P04844-2	RPN2_HUMAN	RPN2	Dolichyl-diphosphooligosaccharide--protein glycosyltransferase subunit 2	13298.1	10033.2	12491.7	11656.9
P04899-2;P04899-3;P04899-5;P04899-6	P04899;P04899-2;P04899-3;P04899-4;P04899-5;P04899-6	GNAI2_HUMAN	GNAI2	Isoform 2 of Guanine nucleotide-binding protein G(i) subunit alpha-2	5726.01	5263.31	6403.92	6686.81
P05023;P05023-3;P05023-4	P05023;P05023-3;P05023-4	AT1A1_HUMAN	ATP1A1	Sodium/potassium-transporting ATPase subunit alpha-1	11918.4	10666.6	11399.5	12078.5
P05026;P05026-2	P05026;P05026-2	AT1B1_HUMAN	ATP1B1	Sodium/potassium-transporting ATPase subunit beta-1	1752.65	3774.72	2317.2	3170.88
P05109	P05109	S10A8_HUMAN	S100A8	Protein S100-A8		4409.29	1399.54	8089.61
P05141	P05141;P12235;P12236;Q9H0C2	ADT2_HUMAN	SLC25A5	ADP/ATP translocase 2	110453	104355	99438	113074
P05165;P05165-2	P05165;P05165-2	PCCA_HUMAN	PCCA	Propionyl-CoA carboxylase alpha chain, mitochondrial	1282.42	1255.72	729.636	1056.79
P05198	P05198	IF2A_HUMAN	EIF2S1	Eukaryotic translation initiation factor 2 subunit 1	16353.1	16325.5	16666.5	16880.1
P05387	P05387	RLA2_HUMAN	RPLP2	Large ribosomal subunit protein P2	1071.05	436.109	904.429	5359.48
P05388	P05388;P05388-2	RLA0_HUMAN	RPLP0	Large ribosomal subunit protein uL10	13418.6	11052.2	15176	11365.5
P05455	P05455	LA_HUMAN	SSB	Lupus La protein	791.115	1159.95	988.173	995.165
P05556	P05556	ITB1_HUMAN	ITGB1	Integrin beta-1	3499.16	4301.27	3488.83	4539.88
P05783	P05783	K1C18_HUMAN	KRT18	Keratin, type I cytoskeletal 18	108063	119234	116909	131436
P05787;P05787-2	P05787;P05787-2	K2C8_HUMAN	KRT8	Keratin, type II cytoskeletal 8	332843	365515	339495	385136
P06312	P06312	KV401_HUMAN	IGKV4-1	Immunoglobulin kappa variable 4-1	207561	287445	183751	276997
P06400	P06400	RB_HUMAN	RB1	Retinoblastoma-associated protein	1246.69	1178.7	964.46	1305.25
P06493;P06493-2	P06493;P06493-2	CDK1_HUMAN	CDK1	Cyclin-dependent kinase 1	4005.7	3877.11	4349.59	4205.68
P06576	P06576	ATPB_HUMAN	ATP5F1B	ATP synthase subunit beta, mitochondrial	26499.7	25448.9	28253.5	29902.7
P06702	P06702	S10A9_HUMAN	S100A9	Protein S100-A9		1392.72	747.478	2707.83
P06703	P06703	S10A6_HUMAN	S100A6	Protein S100-A6		255.38
P06730;P06730-2;P06730-3	P06730;P06730-2;P06730-3	IF4E_HUMAN	EIF4E	Eukaryotic translation initiation factor 4E	6081.65	7685.11	6162.61	6788.36
P06733	P06733;P06733-2	ENOA_HUMAN	ENO1	Alpha-enolase	45770.7	51778.4	44746.2	56640.7
P06744;P06744-2	P06744;P06744-2	G6PI_HUMAN	GPI	Glucose-6-phosphate isomerase	21550.4	27663.7	25257.6	29491.1
P06748;P06748-2	P06748;P06748-2;P06748-3	NPM_HUMAN	NPM1	Nucleophosmin	304.416	1562.39	1532.81	3260.9
P06753-2;P06753-3;P06753-4;P06753-5;P06753-6	P06753;P07951;P09493;P09493-10;P67936;P07951-2;P09493-5;P06753-2;P06753-3;P09493-2;P09493-3;P09493-4;P09493-6;P09493-7;P09493-8;P09493-9;P06753-4;P06753-5;P06753-6;P07951-3;P67936-2	TPM3_HUMAN	TPM3	Isoform 2 of Tropomyosin alpha-3 chain	3021.2	2913.99	2689.92	7909.74
P06865	P06865	HEXA_HUMAN	HEXA	Beta-hexosaminidase subunit alpha	1710	1932.43	1663.78	1874.88
P07108;P07108-2;P07108-3;P07108-4;P07108-5	P07108;P07108-2;P07108-3;P07108-4;P07108-5	ACBP_HUMAN	DBI	Acyl-CoA-binding protein				2448.66
P07195	P07195	LDHB_HUMAN	LDHB	L-lactate dehydrogenase B chain		262.559	220.176	276.94
P07237	P07237	PDIA1_HUMAN	P4HB	Protein disulfide-isomerase	1484.28	1278.83	1746.68	4151.57
P07339	P07339	CATD_HUMAN	CTSD	Cathepsin D	23270	27973.5	22943	28261
P07355;P07355-2	A6NMY6;P07355;P07355-2	ANXA2_HUMAN	ANXA2	Annexin A2	10416.3	9541.75	10824.4	10946.4
P07384	P07384	CAN1_HUMAN	CAPN1	Calpain-1 catalytic subunit	10771	12486	10114.8	10446.3
P07437	P04350;P07437;P68371	TBB5_HUMAN	TUBB	Tubulin beta chain	98835	95990.2	103858	108846
P07477	P07477	TRY1_HUMAN	PRSS1	Serine protease 1	45855.6	45820.5	42141.1	24269.3
P07737	P07737	PROF1_HUMAN	PFN1	Profilin-1	58947	57218.6	61881.7	58041.2
P07741	P07741;P07741-2	APT_HUMAN	APRT	Adenine phosphoribosyltransferase	55446.9	49010.6	52954	55084.6
P07814	P07814	SYEP_HUMAN	EPRS1	Bifunctional glutamate/proline--tRNA ligase	10132.2	9898.54	10622.8	10239
P07858	P07858	CATB_HUMAN	CTSB	Cathepsin B	2013.93	1706.18	1836.02	1745.46
P07900;P07900-2	P07900;P07900-2	HS90A_HUMAN	HSP90AA1	Heat shock protein HSP 90-alpha	144724	148221	150034	159224
P07910;P07910-2;P07910-4	O60812;P07910;B2RXH8;B7ZW38;P07910-2;P07910-3;P07910-4;P0DMR1	HNRPC_HUMAN	HNRNPC	Heterogeneous nuclear ribonucleoproteins C1/C2	8036.66	5459.08	7557.34	7427.42
P07947	P06241;P06241-3;P07947;P12931;P06241-2;P12931-2;P12931-3	YES_HUMAN	YES1	Tyrosine-protein kinase Yes	7346.96	7059.69	7677.28	5665.65
P07954;P07954-2	P07954;P07954-2	FUMH_HUMAN	FH	Fumarate hydratase, mitochondrial	3959.73	3493.34	4937.85	4916.96
P07996;P07996-2	P07996;P07996-2	TSP1_HUMAN	THBS1	Thrombospondin-1	1086.67	818.633	1141.16	989.555
P08133;P08133-2	P08133;P08133-2	ANXA6_HUMAN	ANXA6	Annexin A6	7909.7	5991.18	9984.98	6427.32
P08134	P08134;P61586	RHOC_HUMAN	RHOC	Rho-related GTP-binding protein RhoC	22901.1	24872.8	22376.2	24649.1
P08183;P08183-2	P08183;P08183-2	MDR1_HUMAN	ABCB1	ATP-dependent translocase ABCB1	1494.76		666.762
P08195;P08195-2;P08195-3;P08195-4;P08195-5	P08195;P08195-4;P08195-2;P08195-3;P08195-5	4F2_HUMAN	SLC3A2	4F2 cell-surface antigen heavy chain	20408	23825	23404.1	28391.4
P08237;P08237-3	P08237;P08237-2;P08237-3	PFKAM_HUMAN	PFKM	ATP-dependent 6-phosphofructokinase, muscle type	6751.61	6455.94	6167.24	6849.4
P08238	P07900;P08238;Q14568;Q58FF8;P07900-2	HS90B_HUMAN	HSP90AB1	Heat shock protein HSP 90-beta	350932	338755	354569	355006
P08240;P08240-2	P08240;P08240-2	SRPRA_HUMAN	SRPRA	Signal recognition particle receptor subunit alpha	2107.12	2616.11	1695.94
P08243;P08243-2	P08243;P08243-2;P08243-3	ASNS_HUMAN	ASNS	Asparagine synthetase [glutamine-hydrolyzing]	11485.6	12406.3	11739.8	10658.6
P08397;P08397-2	P08397;P08397-2;P08397-3;P08397-4	HEM3_HUMAN	HMBS	Porphobilinogen deaminase	2392.67	2600.19	1783.55	1583.78
P08559;P08559-2;P08559-3;P08559-4	P08559;P08559-2;P08559-3;P08559-4	ODPA_HUMAN	PDHA1	Pyruvate dehydrogenase E1 component subunit alpha, somatic form, mitochondrial	7398.42	8947.53	8193.58	7979.6
P08708	P08708	RS17_HUMAN	RPS17	Small ribosomal subunit protein eS17	8727.24	5875.72	7975.99	7134.18
P08727	P02533;P08727;P08779;P19012;Q04695;P19012-2	K1C19_HUMAN	KRT19	Keratin, type I cytoskeletal 19	155772	162799	156745	179042
P08754	P04899;P08754;P09471;P63096;P04899-2;P04899-3;P04899-4;P04899-5;P04899-6;P09471-2;P63096-2	GNAI3_HUMAN	GNAI3	Guanine nucleotide-binding protein G(i) subunit alpha-3	9441.1	10468.8	8823.29	8395.16
P08758	P08758	ANXA5_HUMAN	ANXA5	Annexin A5	12992.9	7232.95	14126.7	12190.1
P08865	P08865;A0A8I5KQE6	RSSA_HUMAN	RPSA	Small ribosomal subunit protein uS2	36810.4	30816.7	41362.8	36086.2
P09001	P09001	RM03_HUMAN	MRPL3	Large ribosomal subunit protein uL3m	1926.42	3205.47	3222.59	2468.37
P09110;P09110-2	P09110;P09110-2	THIK_HUMAN	ACAA1	3-ketoacyl-CoA thiolase, peroxisomal	742.797	490.679	879.995	450.193
P09382	P09382	LEG1_HUMAN	LGALS1	Galectin-1	2312.63	2697.43	2630.63	3673.85
P09467	O00757;P09467	F16P1_HUMAN	FBP1	Fructose-1,6-bisphosphatase 1	16974.6	17980.4	15476.7	21298.2
P09525;P09525-3	P09525;P09525-2;P09525-3	ANXA4_HUMAN	ANXA4	Annexin A4	4639.14	3980.9	4442.31	4385.84
P09543;P09543-2	P09543;P09543-2	CN37_HUMAN	CNP	2',3'-cyclic-nucleotide 3'-phosphodiesterase		1326.11	769.718	781.019
P09622	P09622;P09622-2;P09622-3	DLDH_HUMAN	DLD	Dihydrolipoyl dehydrogenase, mitochondrial	1741.74	2464.29	2106.32	2636.38
P09651;P09651-2;P09651-3	P09651;P09651-2;P09651-3	ROA1_HUMAN	HNRNPA1	Heterogeneous nuclear ribonucleoprotein A1	2938.72	3318.54	4194.54	4376.07
P09661	P09661	RU2A_HUMAN	SNRPA1	U2 small nuclear ribonucleoprotein A'	4204.14	4496.38	4092.34	4967.44
P09758	P09758	TACD2_HUMAN	TACSTD2	Tumor-associated calcium signal transducer 2	2883.21	1689.06	1950.29	2626.29
P09874	P09874	PARP1_HUMAN	PARP1	Poly [ADP-ribose] polymerase 1	5964.47	5963.03	5659.51	5937.07
P09884	P09884	DPOLA_HUMAN	POLA1	DNA polymerase alpha catalytic subunit	1107.34	727.333	695.852	540.757
P09960	P09960;P09960-4	LKHA4_HUMAN	LTA4H	Leukotriene A-4 hydrolase	10870.3	11804.9	11735.6	10900.7
P09972	P09972	ALDOC_HUMAN	ALDOC	Fructose-bisphosphate aldolase C	1288.91	1781.05	1507.62	1818.75
P0C0L4;P0C0L4-2	P0C0L4;P0C0L5;P0C0L4-2	CO4A_HUMAN	C4A	Complement C4-A	6428.06	6270.74	6435.7	7365.03
P0C0S8;P20671;Q96KK5;Q99878;Q9BTM1	P04908;P0C0S8;P20671;Q16777;Q6FI13;Q7L7L0;Q93077;Q96KK5;Q99878;Q9BTM1	H2A1D_HUMAN;H2A1H_HUMAN;H2A1J_HUMAN;H2A1_HUMAN;H2AJ_HUMAN	H2AC11;H2AC12;H2AC14;H2AC7;H2AJ	Histone H2A type 1	210.645			453.847
P0DME0;Q01105;Q01105-2;Q01105-3;Q01105-4	P0DME0;Q01105;Q01105-2;Q01105-3;Q01105-4	SETLP_HUMAN;SET_HUMAN	SET;SETSIP	Protein SETSIP				1104.54
P0DMM9;P0DMM9-3;P0DMN0;P50225;P50225-2;P50226	P0DMM9;P0DMN0;P50225;P50226;P0DMM9-3;P50225-2	ST1A1_HUMAN;ST1A2_HUMAN;ST1A3_HUMAN;ST1A4_HUMAN	SULT1A1;SULT1A2;SULT1A3;SULT1A4	Sulfotransferase 1A3	654.493	1100.5	1251.06	1592.09
P0DMV8;P0DMV9	P0DMV8;P0DMV9;P34931;P0DMV8-2	HS71A_HUMAN;HS71B_HUMAN	HSPA1A;HSPA1B	Heat shock 70 kDa protein 1A	68094.5	65978.1	68878.3	73710
P0DOX5	P0DOX5	IGG1_HUMAN		Immunoglobulin gamma-1 heavy chain	8108.94	8429.35	6716.89	9271.57
P0DOX7	P0DOX7	IGK_HUMAN		Immunoglobulin kappa light chain	11090.7	9581.69	10027.9	12734.1
P0DP01	P01742;P01743;A0A0B4J2H0;A0A0C4DH29;P0DP01	HV108_HUMAN	IGHV1-8	Immunoglobulin heavy variable 1-8	2069.15	1421.52	1140.4	1620.02
P0DP23;P0DP24;P0DP25	P0DP23;P0DP24;P0DP25	CALM1_HUMAN;CALM2_HUMAN;CALM3_HUMAN	CALM1;CALM2;CALM3	Calmodulin-1		677.384	782.999	749.686
P0DPB6	P0DPB6	RPAC2_HUMAN	POLR1D	DNA-directed RNA polymerases I and III subunit RPAC2	2339.65	3200.14	2960.52	3107.67
P0DPH7;P0DPH7-2;P0DPH8;Q6PEY2;Q71U36;Q71U36-2	P0DPH7;P0DPH8;Q6PEY2;Q71U36;P0DPH7-2;Q71U36-2	TBA1A_HUMAN;TBA3C_HUMAN;TBA3D_HUMAN;TBA3E_HUMAN	TUBA1A;TUBA3C;TUBA3D;TUBA3E	Tubulin alpha-3C chain		1030.73	1050.21	803.943
P10155;P10155-3;P10155-4;P10155-5	P10155;P10155-3;P10155-4;P10155-5	RO60_HUMAN	RO60	RNA-binding protein RO60	2437.34	2938.83	2895.04	3399.96
P10301	P10301;P62070;P62070-3;P62070-4	RRAS_HUMAN	RRAS	Ras-related protein R-Ras		544.108	547.958	456.864
P10321;P10321-2	P10321;P10321-2	HLAC_HUMAN	HLA-C	HLA class I histocompatibility antigen, C alpha chain	2052.54	1353.22	1953.46	1666.8
P10398	P04049;P10398;P15056;P04049-2	ARAF_HUMAN	ARAF	Serine/threonine-protein kinase A-Raf	5093.52	4590.17	3834.73	4298.19
P10412;P16402;P16403	P10412;P16402;P16403	H12_HUMAN;H13_HUMAN;H14_HUMAN	H1-2;H1-3;H1-4	Histone H1.4	3546.51	3473.83	2560.15	2696.01
P10515	P10515	ODP2_HUMAN	DLAT	Dihydrolipoyllysine-residue acetyltransferase component of pyruvate dehydrogenase complex, mitochondrial	1910.86	1701.11	1274.63	1667.48
P10586;P10586-2	P10586;P10586-2	PTPRF_HUMAN	PTPRF	Receptor-type tyrosine-protein phosphatase F	10836.8	10857.1	11320.9	11477.1
P10599;P10599-2	P10599;P10599-2	THIO_HUMAN	TXN	Thioredoxin	917.115	735.796	411.29	1348.19
P10619;P10619-2	P10619;P10619-2	PPGB_HUMAN	CTSA	Lysosomal protective protein	1463.05	1552.6	1626.29	1330.96
P10620	P10620;P10620-2	MGST1_HUMAN	MGST1	Microsomal glutathione S-transferase 1	6039.26	9341.69	7655.79	9374.07
P10644	P10644;P10644-2	KAP0_HUMAN	PRKAR1A	cAMP-dependent protein kinase type I-alpha regulatory subunit	593.951	504.847	1452.2	1342.9
P10809	P10809	CH60_HUMAN	HSPD1	60 kDa heat shock protein, mitochondrial	27936.8	16131.1	28440.4	26040
P11021	P11021	BIP_HUMAN	HSPA5	Endoplasmic reticulum chaperone BiP	20936.4	19001.8	23157.9	24163.9
P11117	P11117	PPAL_HUMAN	ACP2	Lysosomal acid phosphatase	690.962	1475.03	1452.21	1379.65
P11142	P11142;P54652;P11142-2	HSP7C_HUMAN	HSPA8	Heat shock cognate 71 kDa protein	245106	232505	259061	254454
P11166	P11166	GTR1_HUMAN	SLC2A1	Solute carrier family 2, facilitated glucose transporter member 1	11407.2	17666.3	13986.5	13314.2
P11172	P11172	UMPS_HUMAN	UMPS	Uridine 5'-monophosphate synthase	4190.77	3937.14	4802.04	4232.31
P11177;P11177-2	P11177;P11177-2;P11177-3	ODPB_HUMAN	PDHB	Pyruvate dehydrogenase E1 component subunit beta, mitochondrial	5968.1	5032.05	4934.48	4737.62
P11216	P11216;P11217	PYGB_HUMAN	PYGB	Glycogen phosphorylase, brain form	11610	11480.6	12291.7	13660.2
P11279	P11279	LAMP1_HUMAN	LAMP1	Lysosome-associated membrane glycoprotein 1	4166.74	5154.71	4318.9	5487.72
P11310;P11310-2	P11310;P11310-2	ACADM_HUMAN	ACADM	Medium-chain specific acyl-CoA dehydrogenase, mitochondrial	3072.27	2573.5	2078.35	2238.55
P11388;P11388-2;P11388-3;P11388-4	P11388;P11388-2;P11388-3;P11388-4	TOP2A_HUMAN	TOP2A	DNA topoisomerase 2-alpha	3771.09	3396.59	4118.63	3602.71
P11413;P11413-2;P11413-3	P11413;P11413-2;P11413-3	G6PD_HUMAN	G6PD	Glucose-6-phosphate 1-dehydrogenase	72168.4	74370.9	73238.8	75960.4
P11498	P11498	PYC_HUMAN	PC	Pyruvate carboxylase, mitochondrial	3008.69	3033.14	2827.04	2767.67
P11586	P11586	C1TC_HUMAN	MTHFD1	C-1-tetrahydrofolate synthase, cytoplasmic	23582.7	23232.8	25856.5	24998.2
P11717	P11717	MPRI_HUMAN	IGF2R	Cation-independent mannose-6-phosphate receptor	1147.49	1034.68	965.748	1396.94
P11766	P11766	ADHX_HUMAN	ADH5	Alcohol dehydrogenase class-3	13998.9	15708.4	11754.3	17553.1
P11802	P11802	CDK4_HUMAN	CDK4	Cyclin-dependent kinase 4	710.244	682.81	526.358	600.878
P11908;P11908-2	P11908;P21108;P60891;P11908-2;P60891-2	PRPS2_HUMAN	PRPS2	Ribose-phosphate pyrophosphokinase 2	7875.06	7781.9	10197.7	9477.87
P11940;P11940-2	P11940;Q13310;P11940-2;Q13310-2;Q13310-3	PABP1_HUMAN	PABPC1	Polyadenylate-binding protein 1	32004.4	31605.4	32599.1	33840.3
P12004	P12004	PCNA_HUMAN	PCNA	Proliferating cell nuclear antigen	12929.9	12186.6	10902	12668.9
P12081;P12081-4	P12081;P49590;P12081-2;P12081-3;P12081-4;P49590-2	HARS1_HUMAN	HARS1	Histidine--tRNA ligase, cytoplasmic	5766.51	5274.61	5832.21	5355.31
P12235	P12235	ADT1_HUMAN	SLC25A4	ADP/ATP translocase 1	5090.63	4625.08	4573.26	3959.5
P12236	P12236	ADT3_HUMAN	SLC25A6	ADP/ATP translocase 3	14462.9	14186.9	12682.7	12073.5
P12268	P12268	IMDH2_HUMAN	IMPDH2	Inosine-5'-monophosphate dehydrogenase 2	7352	7137.06	7667.37	8077.47
P12277	P12277	KCRB_HUMAN	CKB	Creatine kinase B-type	709.439	755.737	510.627	965.23
P12429	P12429	ANXA3_HUMAN	ANXA3	Annexin A3	1060.54	759.212	1188.54	505.931
P12532;P12532-2;P17540	P12532;P17540;P12532-2	KCRS_HUMAN;KCRU_HUMAN	CKMT1A;CKMT2	Creatine kinase U-type, mitochondrial	473.228	977.763	748.929	1234.89
P12694;P12694-2	P12694;P12694-2	ODBA_HUMAN	BCKDHA	2-oxoisovalerate dehydrogenase subunit alpha, mitochondrial	709.089	1519.59	1470.45	1518.16
P12814;P12814-2;P12814-3;P12814-4	P12814;P35609;P12814-2;P12814-3;P12814-4;P35609-2	ACTN1_HUMAN	ACTN1	Alpha-actinin-1	2099.73	1414.65	2081.57	1910.73
P12830;P12830-2	P12830;P12830-2	CADH1_HUMAN	CDH1	Cadherin-1	598.693			819.921
P12931;P12931-2;P12931-3	P12931;P12931-2;P12931-3	SRC_HUMAN	SRC	Proto-oncogene tyrosine-protein kinase Src	865.137	884.042	666.485	1083.15
P12956	P12956;P12956-2	XRCC6_HUMAN	XRCC6	X-ray repair cross-complementing protein 6	32287.7	34650.1	32856.7	35653.8
P13010	P13010	XRCC5_HUMAN	XRCC5	X-ray repair cross-complementing protein 5	50130.6	46866.8	51107.3	46467.7
P13051	P13051	UNG_HUMAN	UNG	Uracil-DNA glycosylase	2922.98	3073.28	3109.04	2928.84
P13284	P13284	GILT_HUMAN	IFI30	Gamma-interferon-inducible lysosomal thiol reductase	492.3		437.065	488.478
P13489	P13489	RINI_HUMAN	RNH1	Ribonuclease inhibitor	18559.6	16748.4	17182.2	18405.8
P13639	P13639	EF2_HUMAN	EEF2	Elongation factor 2	135878	122867	129457	122855
P13645	P13645	K1C10_HUMAN	KRT10	Keratin, type I cytoskeletal 10	10272.3	44631.7	12147.6	30053.1
P13646;P13646-2;P13646-3;P19012	P13646;P19012;P13646-2;P13646-3	K1C13_HUMAN;K1C15_HUMAN	KRT13;KRT15	Keratin, type I cytoskeletal 13	19873.7	16118.5	22022.7	15912.5
P13647	P13647	K2C5_HUMAN	KRT5	Keratin, type II cytoskeletal 5	3945.22	14071.2	4941.26	5214.69
P13667	P13667	PDIA4_HUMAN	PDIA4	Protein disulfide-isomerase A4	20854.1	20356	21393.2	22481
P13674;P13674-2;P13674-3	P13674;P13674-2;P13674-3	P4HA1_HUMAN	P4HA1	Prolyl 4-hydroxylase subunit alpha-1	3912.78	3851.23	3277.88	3459.04
P13693	P13693;P13693-2;Q56UQ5	TCTP_HUMAN	TPT1	Translationally-controlled tumor protein	2437.16	2378.46	2987.95	2768.07
P13797-2	P13797;Q14651;P13797-2;P13797-3	PLST_HUMAN	PLS3	Isoform 2 of Plastin-3	2871.49	1974.29	3120.38	2694.07
P13798	P13798	ACPH_HUMAN	APEH	Acylamino-acid-releasing enzyme	2435.39	4007.64	2489.34	2439.37
P13804	P13804;P13804-2	ETFA_HUMAN	ETFA	Electron transfer flavoprotein subunit alpha, mitochondrial	10753.1	11934.4	11088.7	11595.1
P13807;P13807-2	P13807;P13807-2	GYS1_HUMAN	GYS1	Glycogen [starch] synthase, muscle	2311.2	1439.32	1636.22	1875.91
P13861;P13861-2;P31323	P13861;P31323;P13861-2	KAP2_HUMAN;KAP3_HUMAN	PRKAR2A;PRKAR2B	cAMP-dependent protein kinase type II-alpha regulatory subunit	1126.84	1117.21	509.218	997.053
P14174	P14174	MIF_HUMAN	MIF	Macrophage migration inhibitory factor	37115.1	43640.5	39479.2	42552.3
P14314;P14314-2	P14314;P14314-2	GLU2B_HUMAN	PRKCSH	Glucosidase 2 subunit beta	5465.77	6969.56	6409.52	8003.58
P14324;P14324-2	P14324;P14324-2	FPPS_HUMAN	FDPS	Farnesyl pyrophosphate synthase	4370.94	3053.43	5113.88	3757.24
P14406	P14406	CX7A2_HUMAN	COX7A2	Cytochrome c oxidase subunit 7A2, mitochondrial	3586.7	3706.32	3845.36	3947.5
P14550	P14550	AK1A1_HUMAN	AKR1A1	Aldo-keto reductase family 1 member A1		591.665	1306.5	1072.22
P14618	P14618;P14618-2;P14618-3	KPYM_HUMAN	PKM	Pyruvate kinase PKM	153814	170675	156887	153500
P14618-2	P14618-2	KPYM_HUMAN	PKM	Isoform M1 of Pyruvate kinase PKM	5972.37	5467.59	5491.21	6608.78
P14625	P14625	ENPL_HUMAN	HSP90B1	Endoplasmin	38840.8	39731	46339.5	43227.7
P14678;P14678-2;P14678-3;P63162;P63162-2	P14678;P14678-2;P63162;P14678-3;P63162-2	RSMB_HUMAN;RSMN_HUMAN	SNRPB;SNRPN	Small nuclear ribonucleoprotein-associated proteins B and B'	2230.6	3611.22	2177.54	2357.45
P14735	P14735	IDE_HUMAN	IDE	Insulin-degrading enzyme	6357.67	8154.86	6928.56	6930.72
P14866;P14866-2	P14866;P14866-2	HNRPL_HUMAN	HNRNPL	Heterogeneous nuclear ribonucleoprotein L	11334.6	12140.5	11143.4	11031.4
P14868	P14868	SYDC_HUMAN	DARS1	Aspartate--tRNA ligase, cytoplasmic	17497	17646.1	16581.2	16620.6
P14923	P14923	PLAK_HUMAN	JUP	Junction plakoglobin	3282.41	3360.19	3106.22	3213.49
P15170-2;P15170-3	P15170;P15170-2;P15170-3	ERF3A_HUMAN	GSPT1	Isoform 2 of Eukaryotic peptide chain release factor GTP-binding subunit ERF3A	1170	2108.32	2569.34	2034.44
P15311	P15311	EZRI_HUMAN	EZR	Ezrin	20352.2	16161.2	18280.1	19809.4
P15374	P15374	UCHL3_HUMAN	UCHL3	Ubiquitin carboxyl-terminal hydrolase isozyme L3	93162	103405	81353.9	15247.8
P15559;P15559-2;P15559-3	P15559;P15559-2;P15559-3	NQO1_HUMAN	NQO1	NAD(P)H dehydrogenase [quinone] 1	25017.8	31513.7	25533	29313.1
P15586;P15586-2	P15586;P15586-2	GNS_HUMAN	GNS	N-acetylglucosamine-6-sulfatase	455.403	880.878	1116.18	1410.31
P15880	P15880	RS2_HUMAN	RPS2	Small ribosomal subunit protein uS5	6239.86	8731.88	8032.23	7680.25
P15924	P15924;P15924-2;P15924-3	DESP_HUMAN	DSP	Desmoplakin	3447.77	4072.36	3704.11	3863.85
P15927;P15927-2;P15927-3	P15927;P15927-2;P15927-3	RFA2_HUMAN	RPA2	Replication protein A 32 kDa subunit	1760.93	2161.29	2038.39	2860.63
P16152	P16152	CBR1_HUMAN	CBR1	Carbonyl reductase [NADPH] 1	6555.49	6387.02	6767.82	7322.35
P16278;P16278-3	P16278;P16278-2;P16278-3	BGAL_HUMAN	GLB1	Beta-galactosidase	3583.31	3811.56	3036.79	3823.89
P16401	P16401	H15_HUMAN	H1-5	Histone H1.5	7277.17	7902.95	6305.28	5422.39
P16422	P16422	EPCAM_HUMAN	EPCAM	Epithelial cell adhesion molecule	2685.4	2804.53	2504.37	2331.89
P16435	P16435	NCPR_HUMAN	POR	NADPH--cytochrome P450 reductase	4940.22	5074.66	5313.49	4984.65
P16615	P16615;P16615-2;P16615-3;P16615-4;P16615-5	AT2A2_HUMAN	ATP2A2	Sarcoplasmic/endoplasmic reticulum calcium ATPase 2	10794.3	11003.8	10744	10178.2
P16930	P16930;P16930-2	FAAA_HUMAN	FAH	Fumarylacetoacetase	3165.46	3544.66	4407.76	5884.74
P17174	P17174;P17174-2	AATC_HUMAN	GOT1	Aspartate aminotransferase, cytoplasmic	4720.59	5702.33	5332.66	5870.94
P17301	P17301	ITA2_HUMAN	ITGA2	Integrin alpha-2	3040	4108.95	3065.38	2989.05
P17612;P17612-2	P17612;P22694;P22694-10;P22694-2;P22694-3;P22694-4;P22694-5;P22694-6;P22694-7;P22694-9;P17612-2	KAPCA_HUMAN	PRKACA	cAMP-dependent protein kinase catalytic subunit alpha	2639.51	2551.85	2926.79	3196.56
P17706;P17706-2;P17706-3;P17706-4	P17706;P17706-2;P17706-3;P17706-4	PTN2_HUMAN	PTPN2	Tyrosine-protein phosphatase non-receptor type 2	7586.43	6644.31	7327.17	6950.59
P17812	P17812;Q9NRF8	PYRG1_HUMAN	CTPS1	CTP synthase 1	5287.08	5659.63	7028.01	5933.59
P17844;P17844-2	P17844;P17844-2	DDX5_HUMAN	DDX5	Probable ATP-dependent RNA helicase DDX5	33132.9	32828.7	35093.6	31254.1
P17858-2	P08237;P17858;P08237-3;P17858-2	PFKAL_HUMAN	PFKL	Isoform 2 of ATP-dependent 6-phosphofructokinase, liver type	11767.9	10741.6	11629.2	13346.6
P17948;P17948-5;P17948-6;P17948-7;P17948-8	P17948;P17948-5;P17948-6;P17948-7;P17948-8	VGFR1_HUMAN	FLT1	Vascular endothelial growth factor receptor 1			564.293	649.23
P17980	P17980	PRS6A_HUMAN	PSMC3	26S proteasome regulatory subunit 6A	7678.82	6595.5	6919.54	6920.04
P17987	P17987	TCPA_HUMAN	TCP1	T-complex protein 1 subunit alpha	41358.8	39459.9	39774.3	38718.6
P18031	P18031	PTN1_HUMAN	PTPN1	Tyrosine-protein phosphatase non-receptor type 1	2093.7	1803.84	2391.67	2194.93
P18074	P18074	ERCC2_HUMAN	ERCC2	General transcription and DNA repair factor IIH helicase subunit XPD	1404.5	732.008	824.479	952.319
P18077	P18077	RL35A_HUMAN	RPL35A	Large ribosomal subunit protein eL33	95203.4	106612	87057.7	88209.6
P18085	P18085	ARF4_HUMAN	ARF4	ADP-ribosylation factor 4	17955	19386.9	15763.2	15724.8
P18124	P18124	RL7_HUMAN	RPL7	Large ribosomal subunit protein uL30	46248.2	45064.5	48374.5	42469.7
P18206;P18206-2	P18206;P18206-2	VINC_HUMAN	VCL	Vinculin	1307.75	1184.65	1063.44	1270.94
P18440	P18440	ARY1_HUMAN	NAT1	Arylamine N-acetyltransferase 1	3383.37	2409.24	2975.32	1994.59
P18583;P18583-10;P18583-2;P18583-3;P18583-4;P18583-5;P18583-6;P18583-7;P18583-8;P18583-9	P18583;P18583-10;P18583-2;P18583-3;P18583-4;P18583-5;P18583-6;P18583-7;P18583-8;P18583-9	SON_HUMAN	SON	Protein SON	1318.8	1190.38	1222.26	1474.07
P18621;P18621-3	P18621;P18621-3	RL17_HUMAN	RPL17	Large ribosomal subunit protein uL22	26001.5	33250.3	29617.2	34604.2
P18669	P15259;P18669	PGAM1_HUMAN	PGAM1	Phosphoglycerate mutase 1	19245.2	16890.3	19406.5	22647.6
P18754;P18754-2	P18754;P18754-2	RCC1_HUMAN	RCC1	Regulator of chromosome condensation	5845.13	6104.09	5398.57	6115.6
P18827	P18827	SDC1_HUMAN	SDC1	Syndecan-1	2360.84	1449.31	1238.62	2902.65
P18858;P18858-3	P18858;P18858-2;P18858-3	DNLI1_HUMAN	LIG1	DNA ligase 1	1836.39	1396.64	2218.98	2057.01
P18887	P18887	XRCC1_HUMAN	XRCC1	DNA repair protein XRCC1	2315.95	2384.1	1705.85	1388.93
P19174;P19174-2	P19174;P19174-2	PLCG1_HUMAN	PLCG1	1-phosphatidylinositol 4,5-bisphosphate phosphodiesterase gamma-1	963.68	1379.07	1389.93	1353.74
P19338	P19338	NUCL_HUMAN	NCL	Nucleolin	19119.8	18521.3	18440	16581.7
P19367;P19367-2;P19367-3;P19367-4	P19367;P19367-2;P19367-3;P19367-4	HXK1_HUMAN	HK1	Hexokinase-1	8073.89	8637.62	8836.38	11366
P19387	P19387	RPB3_HUMAN	POLR2C	DNA-directed RNA polymerase II subunit RPB3	368.239	179.4	187.617	512.745
P19388	P19388	RPAB1_HUMAN	POLR2E	DNA-directed RNA polymerases I, II, and III subunit RPABC1	565.853	409.554	442.539	577.854
P19404	P19404	NDUV2_HUMAN	NDUFV2	NADH dehydrogenase [ubiquinone] flavoprotein 2, mitochondrial	600.802	985.434	763.174	624.536
P19525	P19525;P19525-2	E2AK2_HUMAN	EIF2AK2	Interferon-induced, double-stranded RNA-activated protein kinase	3227.94	4141.07	3570.29	3231.75
P19623	P19623	SPEE_HUMAN	SRM	Spermidine synthase	41020.9	40972.4	37913	34360.7
P19784	P19784	CSK22_HUMAN	CSNK2A2	Casein kinase II subunit alpha'	2139.99	2942.64	2503.6	2821.51
P19838;P19838-2;P19838-3	P19838;P19838-2;P19838-3	NFKB1_HUMAN	NFKB1	Nuclear factor NF-kappa-B p105 subunit			233.417
P20020;P20020-1;P20020-4;P20020-6	P20020;P23634;P23634-2;P23634-3;P23634-4;P23634-5;P23634-6;P23634-7;P23634-8;P20020-1;P20020-2;P20020-4;P20020-5;P20020-6	AT2B1_HUMAN	ATP2B1	Plasma membrane calcium-transporting ATPase 1	4012.19	3563.52	4035.74	3753.53
P20042	P20042	IF2B_HUMAN	EIF2S2	Eukaryotic translation initiation factor 2 subunit 2	14484	11022.4	13118.1	8745.95
P20073;P20073-2	P20073;P20073-2	ANXA7_HUMAN	ANXA7	Annexin A7	4502.83	4492.74	4810.03	4778.73
P20290;P20290-2	P20290;P20290-2	BTF3_HUMAN	BTF3	Transcription factor BTF3	4600.22	5551.29	4032.02	5275.63
P20336	P20336	RAB3A_HUMAN	RAB3A	Ras-related protein Rab-3A	1601.33	1370.24	1203.53	1952.45
P20338	P20338	RAB4A_HUMAN	RAB4A	Ras-related protein Rab-4A	1404.02	2146.74	1413.01	1289.98
P20339;P20339-2	P20339;P20339-2	RAB5A_HUMAN	RAB5A	Ras-related protein Rab-5A	6658.84	8596.54	6492.55	7236.49
P20340;P20340-2	P20340;P20340-2;P20340-3;P20340-4	RAB6A_HUMAN	RAB6A	Ras-related protein Rab-6A	22057.9	25158.9	23641.8	21936.1
P20585	P20585	MSH3_HUMAN	MSH3	DNA mismatch repair protein Msh3	1675.44	1710.58	2236.41	2250.44
P20618	P20618	PSB1_HUMAN	PSMB1	Proteasome subunit beta type-1	7933.68	11590	9688.3	9909.95
P20839;P20839-2;P20839-3;P20839-4;P20839-5;P20839-6;P20839-7	P20839;P20839-3;P20839-2;P20839-4;P20839-5;P20839-6;P20839-7	IMDH1_HUMAN	IMPDH1	Inosine-5'-monophosphate dehydrogenase 1	3928.44	3234.47	4352.93	5075.29
P20936;P20936-2;P20936-4	P20936;P20936-2;P20936-4	RASA1_HUMAN	RASA1	Ras GTPase-activating protein 1	784.951	367.528	561.31	706.523
P21127;P21127-10;P21127-12;P21127-2;P21127-3;P21127-4;P21127-5;P21127-6;P21127-8;P21127-9;Q9UQ88;Q9UQ88-10;Q9UQ88-2;Q9UQ88-3;Q9UQ88-4;Q9UQ88-5	P21127;Q9UQ88;P21127-10;P21127-12;P21127-2;P21127-3;P21127-4;P21127-5;P21127-6;P21127-8;P21127-9;Q9UQ88-10;Q9UQ88-2;Q9UQ88-3;Q9UQ88-4;Q9UQ88-5;Q9UQ88-9	CD11A_HUMAN;CD11B_HUMAN	CDK11A;CDK11B	Cyclin-dependent kinase 11B	806.267	635.52	367.157	352.266
P21266	P21266	GSTM3_HUMAN	GSTM3	Glutathione S-transferase Mu 3	2596.19	3132.74	2637.34	2980.05
P21281	P21281	VATB2_HUMAN	ATP6V1B2	V-type proton ATPase subunit B, brain isoform	2753.6	3221.74	2508.61	3656.4
P21283	P21283	VATC1_HUMAN	ATP6V1C1	V-type proton ATPase subunit C 1	2753.15	1988.9	2448.75	2300.86
P21291	P21291	CSRP1_HUMAN	CSRP1	Cysteine and glycine-rich protein 1	1834.42	2599.51	2140.14	3494.81
P21333;P21333-2	P21333;P21333-2	FLNA_HUMAN	FLNA	Filamin-A	6102.54	5613.55	6831.33	6767.69
P21399	P21399	ACOHC_HUMAN	ACO1	Cytoplasmic aconitate hydratase	1352.5	1816.48	796.728	746.377
P21796	P21796	VDAC1_HUMAN	VDAC1	Voltage-dependent anion-selective channel protein 1	28257.8	35211.2	26251.1	29837.6
P21964;P21964-2	P21964;P21964-2	COMT_HUMAN	COMT	Catechol O-methyltransferase	2556.73	2550.22	2274.9	3990.14
P22033	P22033	MUTA_HUMAN	MMUT	Methylmalonyl-CoA mutase, mitochondrial	2007.49	2372.22	1956.86	2414.94
P22059	P22059	OSBP1_HUMAN	OSBP	Oxysterol-binding protein 1	2484.53	3691.19	2086.33	2667.65
P22061;P22061-2	P22061;P22061-2	PIMT_HUMAN	PCMT1	Protein-L-isoaspartate(D-aspartate) O-methyltransferase	856.577	1376.11	856.791	1574.17
P22087	P22087	FBRL_HUMAN	FBL	rRNA 2'-O-methyltransferase fibrillarin	6589.42	6141.85	7352.68	5698.11
P22102	P22102	PUR2_HUMAN	GART	Trifunctional purine biosynthetic protein adenosine-3	15493.2	15572.6	15245.6	15147
P22234	P22234;P22234-2	PUR6_HUMAN	PAICS	Bifunctional phosphoribosylaminoimidazole carboxylase/phosphoribosylaminoimidazole succinocarboxamide synthetase	16502.8	19056.9	17272.6	17458.5
P22314;P22314-2	P22314;P22314-2	UBA1_HUMAN	UBA1	Ubiquitin-like modifier-activating enzyme 1	11235	9800.2	12288.5	10293.2
P22392-2	P15531;P22392;O60361;P22392-2;P15531-2	NDKB_HUMAN	NME2	Isoform 3 of Nucleoside diphosphate kinase B	16183.2	19372	18466.6	20834.5
P22570;P22570-2;P22570-3;P22570-4;P22570-5;P22570-6;P22570-7	P22570;P22570-2;P22570-3;P22570-4;P22570-5;P22570-6;P22570-7	ADRO_HUMAN	FDXR	NADPH:adrenodoxin oxidoreductase, mitochondrial	3129.92	2946.56	2839.74	2537.69
P22626;P22626-2	P22626;P22626-2	ROA2_HUMAN	HNRNPA2B1	Heterogeneous nuclear ribonucleoproteins A2/B1	14205.9	13555.2	15721.6	14421.3
P22694;P22694-2;P22694-3;P22694-4;P22694-5;P22694-6;P22694-7;P22694-9	P22694;P22694-2;P22694-3;P22694-4;P22694-5;P22694-6;P22694-7;P22694-8;P22694-9	KAPCB_HUMAN	PRKACB	cAMP-dependent protein kinase catalytic subunit beta	202.674	78.0455	414.255	287.199
P22695	P22695	QCR2_HUMAN	UQCRC2	Cytochrome b-c1 complex subunit 2, mitochondrial	5882.68	6351.4	5793.22	8728.99
P22830;P22830-2	P22830;P22830-2	HEMH_HUMAN	FECH	Ferrochelatase, mitochondrial	3892.92	3532.86	2959.97	3640.45
P23246	P23246;P23246-2	SFPQ_HUMAN	SFPQ	Splicing factor, proline- and glutamine-rich	6650.19	4130.67	7178.8	5630.86
P23258	P23258	TBG1_HUMAN	TUBG1	Tubulin gamma-1 chain	2205.24	2085.29	2194.87	1822.45
P23284	P23284	PPIB_HUMAN	PPIB	Peptidyl-prolyl cis-trans isomerase B	40286.2	45523.8	36934.4	40335.6
P23381;P23381-2	P23381;P23381-2	SYWC_HUMAN	WARS1	Tryptophan--tRNA ligase, cytoplasmic	5126.41	5482.32	3848.21	6031.42
P23396	P23396;P23396-2	RS3_HUMAN	RPS3	Small ribosomal subunit protein uS3	95431.7	96171	97217.8	89011.9
P23443;P23443-2;P23443-3;P23443-4;P23443-5	P23443;P23443-4;P23443-2;P23443-3;P23443-5	KS6B1_HUMAN	RPS6KB1	Ribosomal protein S6 kinase beta-1	2343.99	2661.55	3233.04	3639.84
P23526	P23526;P23526-2	SAHH_HUMAN	AHCY	Adenosylhomocysteinase	36208.1	41698.1	32145.4	39896.5
P23528	P23528;Q9Y281;Q9Y281-3	COF1_HUMAN	CFL1	Cofilin-1	82596.9	84319.6	87924.9	93777.5
P23786	P23786	CPT2_HUMAN	CPT2	Carnitine O-palmitoyltransferase 2, mitochondrial	1354.84	1677.12	1449.22	1164.13
P23919;P23919-2	P23919;P23919-2	KTHY_HUMAN	DTYMK	Thymidylate kinase	2007.04	2124.98	2398.35	2101.66
P23921	P23921	RIR1_HUMAN	RRM1	Ribonucleoside-diphosphate reductase large subunit	4592.23	6437.5	4563.32	5309.38
P24534	P24534	EF1B_HUMAN	EEF1B2	Elongation factor 1-beta	6945.1	10016.7	6800.46	5430.96
P24752	P24752;P24752-2	THIL_HUMAN	ACAT1	Acetyl-CoA acetyltransferase, mitochondrial	2152.35	2592.66	4329.98	3404.51
P24928	P24928	RPB1_HUMAN	POLR2A	DNA-directed RNA polymerase II subunit RPB1	1530.03	1241.54	1335.62	1517.83
P24941;P24941-2	P24941;P24941-2	CDK2_HUMAN	CDK2	Cyclin-dependent kinase 2	1595.38	1292.69	1800.76	2311.68
P25098;P35626	P25098;P35626	ARBK1_HUMAN;ARBK2_HUMAN	GRK2;GRK3	Beta-adrenergic receptor kinase 1	2094.17	1931.91	1982.1	1745.04
P25205;P25205-2	P25205;P25205-2	MCM3_HUMAN	MCM3	DNA replication licensing factor MCM3	15065	15893	14525.8	15611.3
P25398	P25398	RS12_HUMAN	RPS12	Small ribosomal subunit protein eS12	24309.8	18304.7	23814	25310.4
P25685	P25685;Q9UDY4;P25685-2	DNJB1_HUMAN	DNAJB1	DnaJ homolog subfamily B member 1	1399.38	611.997	1247.44	989.986
P25705	P25705;P25705-2	ATPA_HUMAN	ATP5F1A	ATP synthase subunit alpha, mitochondrial	31771.7	29811.8	34004.8	31704.9
P25786;P25786-2	P25786;P25786-2	PSA1_HUMAN	PSMA1	Proteasome subunit alpha type-1	3758.99	4693.4	3220.58	5029.51
P25787	P25787	PSA2_HUMAN	PSMA2	Proteasome subunit alpha type-2	4874.75	7470.64	7300.53	7587.4
P25788;P25788-2	P25788;P25788-2	PSA3_HUMAN	PSMA3	Proteasome subunit alpha type-3	4115.24	6001	4764.53	6059.57
P25789	P25789;P25789-2	PSA4_HUMAN	PSMA4	Proteasome subunit alpha type-4	11805.5	14233.5	11577.4	12510.6
P26196	P26196	DDX6_HUMAN	DDX6	Probable ATP-dependent RNA helicase DDX6	25767.1	24447.2	24845.9	22279
P26358;P26358-2;P26358-3	P26358;P26358-2;P26358-3	DNMT1_HUMAN	DNMT1	DNA (cytosine-5)-methyltransferase 1	2723.55	4294.76	2915.4	3308.23
P26368;P26368-2	P26368;P26368-2	U2AF2_HUMAN	U2AF2	Splicing factor U2AF 65 kDa subunit	2429.08	2966.9	2467.86	2745.52
P26373	P26373;P26373-2	RL13_HUMAN	RPL13	Large ribosomal subunit protein eL13	9745.18	16497.6	11818.1	12734.6
P26440;P26440-2	P26440;P26440-2	IVD_HUMAN	IVD	Isovaleryl-CoA dehydrogenase, mitochondrial	2111.75	1661.02	2354.7	2173.31
P26599;P26599-1;P26599-2	P26599;P26599-1;P26599-2	PTBP1_HUMAN	PTBP1	Polypyrimidine tract-binding protein 1	12813.9	9826.81	12596.8	11929.3
P26639;P26639-2	P26639;P26639-2	SYTC_HUMAN	TARS1	Threonine--tRNA ligase 1, cytoplasmic	12364.1	15443.2	13147.7	14574.2
P26640	P26640;P26640-2	SYVC_HUMAN	VARS1	Valine--tRNA ligase	13029.3	13721.1	13617.1	12818.7
P26641;P26641-2	P26641;P26641-2	EF1G_HUMAN	EEF1G	Elongation factor 1-gamma	71829.4	75084.5	80812.1	85505.6
P26885	P26885	FKBP2_HUMAN	FKBP2	Peptidyl-prolyl cis-trans isomerase FKBP2	3430.53	1354.54	1790.43	2330.76
P27348	P27348	1433T_HUMAN	YWHAQ	14-3-3 protein theta	2504.31	1708.41	2512.54	2252.77
P27635	P27635;Q96L21	RL10_HUMAN	RPL10	Large ribosomal subunit protein uL16	7248.58	9568.45	8792.75	7562.58
P27694	P27694	RFA1_HUMAN	RPA1	Replication protein A 70 kDa DNA-binding subunit	10525.7	9908.3	9460.5	9953.03
P27695	P27695	APEX1_HUMAN	APEX1	DNA-(apurinic or apyrimidinic site) endonuclease	8446.7	9648.33	7234.08	9170.74
P27707	P27707	DCK_HUMAN	DCK	Deoxycytidine kinase	1272.45	1079.99	1366.93	1341.71
P27708	P27708	PYR1_HUMAN	CAD	CAD protein	9165.18	9570.28	9855.23	9635.81
P27797	P27797	CALR_HUMAN	CALR	Calreticulin	1019.58	1919.03	1661.56	3087.43
P27816;P27816-6	P27816;P27816-2;P27816-4;P27816-5;P27816-6	MAP4_HUMAN	MAP4	Microtubule-associated protein 4	1471.8	2007.3	1836.46	1697.46
P27824;P27824-2	P27824;P27824-2	CALX_HUMAN	CANX	Calnexin	12826.9	13992.5	15079	15436.5
P28066	P28066	PSA5_HUMAN	PSMA5	Proteasome subunit alpha type-5	6737.86	8877.01	7504.48	8102.37
P28070	P28070	PSB4_HUMAN	PSMB4	Proteasome subunit beta type-4	12752.1	16693.1	12628.8	17053.3
P28072	P28072	PSB6_HUMAN	PSMB6	Proteasome subunit beta type-6	7121.25	8279.78	7468.16	11715.3
P28074	P28074;P28074-3	PSB5_HUMAN	PSMB5	Proteasome subunit beta type-5	9387.78	11682.7	7931.85	11022.5
P28288	P28288;P28288-2	ABCD3_HUMAN	ABCD3	ATP-binding cassette sub-family D member 3	2135.77	2058.76	1646.12	1844.23
P28331;P28331-2;P28331-3;P28331-4;P28331-5	P28331;P28331-2;P28331-3;P28331-4;P28331-5	NDUS1_HUMAN	NDUFS1	NADH-ubiquinone oxidoreductase 75 kDa subunit, mitochondrial	14768	12493.7	15143.4	15344.1
P28340	P28340	DPOD1_HUMAN	POLD1	DNA polymerase delta catalytic subunit	6153.56	5900.2	5775.65	5512.07
P28838;P28838-2	P28838;P28838-2	AMPL_HUMAN	LAP3	Cytosol aminopeptidase	2497.92	3057.14	3869.41	3418.15
P29144	P29144	TPP2_HUMAN	TPP2	Tripeptidyl-peptidase 2	1980.58	1665.86	2105.3	1865.54
P29218;P29218-3	P29218;P29218-3;P29218-2	IMPA1_HUMAN	IMPA1	Inositol monophosphatase 1	3101.94	4813.82	4637.11	4302.03
P29320	P29320	EPHA3_HUMAN	EPHA3	Ephrin type-A receptor 3				1138.09
P29350;P29350-3;P29350-4	P29350;P29350-2;P29350-3;P29350-4	PTN6_HUMAN	PTPN6	Tyrosine-protein phosphatase non-receptor type 6	2095.99	1450.35	1624.14	1473.65
P29372;P29372-2;P29372-4;P29372-5	P29372;P29372-4;P29372-2;P29372-5	3MG_HUMAN	MPG	DNA-3-methyladenine glycosylase	1248.34	1701.56	1968.74	1324.85
P29373	P29373	RABP2_HUMAN	CRABP2	Cellular retinoic acid-binding protein 2	1610.5	1616.17	1412.38	4105.08
P29401;P29401-2	P29401;P29401-2	TKT_HUMAN	TKT	Transketolase	42745.6	40218.4	35879.8	48207.7
P29692;P29692-2	P29692;P29692-2	EF1D_HUMAN	EEF1D	Elongation factor 1-delta	2841.53	2641.16	3008.04	4055.83
P29992	P29992	GNA11_HUMAN	GNA11	Guanine nucleotide-binding protein subunit alpha-11	4514.37	4061.42	4298.09	4333.26
P30038;P30038-3	P30038;P30038-3	AL4A1_HUMAN	ALDH4A1	Delta-1-pyrroline-5-carboxylate dehydrogenase, mitochondrial	2853.43	2320.71	1859.6	1940.6
P30040	P30040	ERP29_HUMAN	ERP29	Endoplasmic reticulum resident protein 29	6323.09	4167.11	6549.68	7784.61
P30041	P30041	PRDX6_HUMAN	PRDX6	Peroxiredoxin-6	97123.3	107880	106855	116249
P30043	P30043	BLVRB_HUMAN	BLVRB	Flavin reductase (NADPH)	6591.25	8316.85	8875.05	9357.25
P30044;P30044-2	P30044;P30044-2	PRDX5_HUMAN	PRDX5	Peroxiredoxin-5, mitochondrial	3916.27	3131.02	3859.74	4421.65
P30046	P30046;A6NHG4;P30046-2	DOPD_HUMAN	DDT	D-dopachrome decarboxylase	2297.23	2293.62	2575.64	3707.56
P30048;P30048-2	P30048;P30048-2	PRDX3_HUMAN	PRDX3	Thioredoxin-dependent peroxide reductase, mitochondrial	18419	15732.2	16743.9	18308.3
P30050	P30050	RL12_HUMAN	RPL12	Large ribosomal subunit protein uL11	48101.8	47112.4	43787.8	48841.1
P30084	P30084	ECHM_HUMAN	ECHS1	Enoyl-CoA hydratase, mitochondrial	5312.62	6193.91	5518.42	6988.5
P30085;P30085-3	P30085;P30085-3	KCY_HUMAN	CMPK1	UMP-CMP kinase	278.046		384.7	423.952
P30086	P30086	PEBP1_HUMAN	PEBP1	Phosphatidylethanolamine-binding protein 1	1502.59	3333.34	3264.03	3656.99
P30101	P30101	PDIA3_HUMAN	PDIA3	Protein disulfide-isomerase A3	7475.23	5905.2	8357.53	8516.46
P30153	P30153	2AAA_HUMAN	PPP2R1A	Serine/threonine-protein phosphatase 2A 65 kDa regulatory subunit A alpha isoform	640.921	474.46	963.049	1193.88
P30260;P30260-2	P30260;P30260-2	CDC27_HUMAN	CDC27	Cell division cycle protein 27 homolog	503.067	681.343	451.402	264.051
P30405	P30405	PPIF_HUMAN	PPIF	Peptidyl-prolyl cis-trans isomerase F, mitochondrial	6837.27	7678.98	6431.59	6506.72
P30419;P30419-2	P30419;P30419-2	NMT1_HUMAN	NMT1	Glycylpeptide N-tetradecanoyltransferase 1	2362.24	2184.25	2188.77	2810.08
P30520	P30520	PURA2_HUMAN	ADSS2	Adenylosuccinate synthetase isozyme 2	4229.58	4518.36	4640.82	4434.19
P30566	P30566	PUR8_HUMAN	ADSL	Adenylosuccinate lyase	4237.36	2703.83	3451.02	3404.02
P30740	P30740	ILEU_HUMAN	SERPINB1	Leukocyte elastase inhibitor	4209.08	5099.31	4506.25	4377.61
P30825	P30825	CTR1_HUMAN	SLC7A1	High affinity cationic amino acid transporter 1	2628.61	1648.82	1880.75	1212.85
P30837	P30837	AL1B1_HUMAN	ALDH1B1	Aldehyde dehydrogenase X, mitochondrial	1717.08	1889.98	2125.4	2308.89
P30876	P30876	RPB2_HUMAN	POLR2B	DNA-directed RNA polymerase II subunit RPB2	1665.5	1438.63	1640.67	2006.99
P31040	P31040	SDHA_HUMAN	SDHA	Succinate dehydrogenase [ubiquinone] flavoprotein subunit, mitochondrial	3177.36	3550.15	3463.87	3200.32
P31146	P31146	COR1A_HUMAN	CORO1A	Coronin-1A		623.311	390.944	440.838
P31150	P31150	GDIA_HUMAN	GDI1	Rab GDP dissociation inhibitor alpha	6231.98	5867.87	5929.1	6641.47
P31151	P31151;Q86SG5	S10A7_HUMAN	S100A7	Protein S100-A7		6023.63	1228.67	9749.49
P31153	P31153;P31153-2	METK2_HUMAN	MAT2A	S-adenosylmethionine synthase isoform type-2	9599.87	10719.3	10539.1	12479.1
P31350;P31350-2	P31350;P31350-2	RIR2_HUMAN	RRM2	Ribonucleoside-diphosphate reductase subunit M2	5124.29	5540.72	5417.51	6229.76
P31431;P31431-2	P31431;P31431-2	SDC4_HUMAN	SDC4	Syndecan-4	2313.2	2723.87	1998.07	1944.4
P31689;P31689-2	P31689;P31689-2	DNJA1_HUMAN	DNAJA1	DnaJ homolog subfamily A member 1	2500.86	2478.73	2041.76	2317.52
P31749;P31749-2	P31749;P31749-2	AKT1_HUMAN	AKT1	RAC-alpha serine/threonine-protein kinase	2516.23	2181.03	1996.23	1666.36
P31751;P31751-2	P31751;P31751-2	AKT2_HUMAN	AKT2	RAC-beta serine/threonine-protein kinase	908.281	1433.33	1132	954.196
P31930	P31930	QCR1_HUMAN	UQCRC1	Cytochrome b-c1 complex subunit 1, mitochondrial	3312.89	3650.88	3779.58	3647.24
P31937	P31937	3HIDH_HUMAN	HIBADH	3-hydroxyisobutyrate dehydrogenase, mitochondrial	932.862	1212.9	1408.94	1512.75
P31939	P31939;P31939-2	PUR9_HUMAN	ATIC	Bifunctional purine biosynthesis protein ATIC	44102.8	43948.4	41678.4	40543.2
P31942;P31942-2;P31942-3	P31942;P31942-2;P31942-3	HNRH3_HUMAN	HNRNPH3	Heterogeneous nuclear ribonucleoprotein H3	1698.04	1923.82	2025.92	1884.96
P31943	P31943	HNRH1_HUMAN	HNRNPH1	Heterogeneous nuclear ribonucleoprotein H	14387.1	10722.8	14681.1	15845
P31946;P31946-2	P31946;P31946-2	1433B_HUMAN	YWHAB	14-3-3 protein beta/alpha	6079.15	3111.59	4993.34	5502.1
P31947;P31947-2	P31947;P31947-2	1433S_HUMAN	SFN	14-3-3 protein sigma	797.059	424.902	902.257	1631.87
P31948;P31948-2;P31948-3	P31948;P31948-2;P31948-3	STIP1_HUMAN	STIP1	Stress-induced-phosphoprotein 1	994.665	1539.47		2721.78
P31949	P31949	S10AB_HUMAN	S100A11	Protein S100-A11	3464	2451.31	3447.15	4467.4
P32119	P32119	PRDX2_HUMAN	PRDX2	Peroxiredoxin-2	23012.9	26136.8	22970.5	32417.2
P32321;P32321-2	P32321;P32321-2	DCTD_HUMAN	DCTD	Deoxycytidylate deaminase	1880.74	2434.82	1233.46	1821.18
P32322;P32322-2;P32322-3	P32322;Q96C36;P32322-2;P32322-3	P5CR1_HUMAN	PYCR1	Pyrroline-5-carboxylate reductase 1, mitochondrial	2924.46	3035.64	3638.1	3557.37
P32969	P32969	RL9_HUMAN	RPL9	Large ribosomal subunit protein uL6	21996.2	22622.5	17150.3	16853.2
P33176	P33176	KINH_HUMAN	KIF5B	Kinesin-1 heavy chain	7974.82	6988.94	8011.92	8303.17
P33316;P33316-2	P33316;P33316-2	DUT_HUMAN	DUT	Deoxyuridine 5'-triphosphate nucleotidohydrolase, mitochondrial	5273.51	3709.68	5334.74	6504.24
P33897	P33897	ABCD1_HUMAN	ABCD1	ATP-binding cassette sub-family D member 1	956.335	1225.49	907.437	838.221
P33991	P33991	MCM4_HUMAN	MCM4	DNA replication licensing factor MCM4	15645.5	14711	15508.8	16234.9
P33992	P33992	MCM5_HUMAN	MCM5	DNA replication licensing factor MCM5	23501.4	25484.2	23023.7	24191.9
P33993	P33993;P33993-3	MCM7_HUMAN	MCM7	DNA replication licensing factor MCM7	22859.6	25532.8	24656.9	25842.8
P34896;P34896-2	P34896;P34896-2;P34896-3;P34896-4	GLYC_HUMAN	SHMT1	Serine hydroxymethyltransferase, cytosolic	4763.51	6319.97	4588.91	4767.13
P34897;P34897-3	P34897;P34897-2;P34897-3	GLYM_HUMAN	SHMT2	Serine hydroxymethyltransferase, mitochondrial	4571.47	5470.74	5571.67	8876.84
P34932	P34932	HSP74_HUMAN	HSPA4	Heat shock 70 kDa protein 4	17997.3	17943.1	17550.8	18668.1
P35080-2	P35080;P35080-2	PROF2_HUMAN	PFN2	Isoform IIb of Profilin-2	13411.1	14000.8	11477.9	12683.8
P35221;P35221-2	P26232;P35221;P26232-2;P26232-3;P26232-4;P26232-5;P26232-6;P35221-2;P35221-3	CTNA1_HUMAN	CTNNA1	Catenin alpha-1	1113.75	1009.69	1002.81	1240.41
P35222	P35222	CTNB1_HUMAN	CTNNB1	Catenin beta-1	2563.54	2263.06	2155.75	2575.47
P35232	P35232;P35232-2	PHB1_HUMAN	PHB1	Prohibitin 1	11392.5	10119.2	12383.6	10218.9
P35237	P35237	SPB6_HUMAN	SERPINB6	Serpin B6	13287.6	14886.3	13182.3	16639.3
P35241;P35241-5	P35241;P35241-2;P35241-4;P35241-5	RADI_HUMAN	RDX	Radixin	173.822	156.317	396.637	718.032
P35249;P35249-2	P35249;P35249-2	RFC4_HUMAN	RFC4	Replication factor C subunit 4	518.609	424.173	830.74	444.615
P35250;P35250-2	P35250;P35250-2	RFC2_HUMAN	RFC2	Replication factor C subunit 2	2709.59	1333.45	3472.84	1560.43
P35251;P35251-2	P35251;P35251-2	RFC1_HUMAN	RFC1	Replication factor C subunit 1	195.076	280.135	308.394	598.419
P35268	P35268	RL22_HUMAN	RPL22	Large ribosomal subunit protein eL22	85798.2	84584.5	83513.9	78687.7
P35270	P35270	SPRE_HUMAN	SPR	Sepiapterin reductase	2506.45	2132.13	1648.95	2077.87
P35520;P35520-2	P35520;P35520-2	CBS_HUMAN	CBS	Cystathionine beta-synthase	8201.55	8481.01	7528.97	7000.91
P35527	P35527	K1C9_HUMAN	KRT9	Keratin, type I cytoskeletal 9	20926.8	115317	30388.5	20431.5
P35573	P35573;P35573-2;P35573-3	GDE_HUMAN	AGL	Glycogen debranching enzyme	1198.74	1665.78	1439.6	1301.52
P35579	P35579;P35579-2	MYH9_HUMAN	MYH9	Myosin-9	8869.83	8634.59	9538.65	10204.3
P35580;P35580-2;P35580-3;P35580-4;P35580-5	P35580;Q7Z406;P35580-2;P35580-3;P35580-4;P35580-5;Q7Z406-2;Q7Z406-4;Q7Z406-5;Q7Z406-6	MYH10_HUMAN	MYH10	Myosin-10	3770.93	4098.52	3761.59	4472.8
P35606;P35606-2	P35606;P35606-2	COPB2_HUMAN	COPB2	Coatomer subunit beta'	17208.1	18936.9	16873.3	16482.4
P35611;P35611-2;P35611-3;P35611-6	P35611;P35611-2;P35611-3;P35611-4;P35611-5;P35611-6	ADDA_HUMAN	ADD1	Alpha-adducin	2718.3	2650.28	2875.13	2936.93
P35613;P35613-2;P35613-3;P35613-4	P35613;P35613-2;P35613-3;P35613-4	BASI_HUMAN	BSG	Basigin	745.894	1603.74	1420.63	1485.05
P35658;P35658-2;P35658-3;P35658-4;P35658-5	P35658;P35658-2;P35658-3;P35658-4;P35658-5	NU214_HUMAN	NUP214	Nuclear pore complex protein Nup214	2007.86	2328.69	2277.03	2049.22
P35813;P35813-2;P35813-3	P35813;P35813-2;P35813-3	PPM1A_HUMAN	PPM1A	Protein phosphatase 1A	491.525	856.184	822.668	1189.6
P35908	P35908	K22E_HUMAN	KRT2	Keratin, type II cytoskeletal 2 epidermal	11382.3	36211	11344.3	33058.5
P35998	P35998;P35998-2	PRS7_HUMAN	PSMC2	26S proteasome regulatory subunit 7	12528.8	12541	14090.9	13742.1
P36404	P36404;P36404-2	ARL2_HUMAN	ARL2	ADP-ribosylation factor-like protein 2	4981.57	4590.4	5513.1	4915.91
P36405	P36405	ARL3_HUMAN	ARL3	ADP-ribosylation factor-like protein 3	10426	9444.88	9827.53	9069.57
P36507	P36507;Q02750;Q02750-2	MP2K2_HUMAN	MAP2K2	Dual specificity mitogen-activated protein kinase kinase 2	5027.89	4960.31	6465.92	4982.28
P36542	P36542;P36542-2	ATPG_HUMAN	ATP5F1C	ATP synthase subunit gamma, mitochondrial	5953.07	6752.35	6070	5242.86
P36578	P36578	RL4_HUMAN	RPL4	Large ribosomal subunit protein uL4	21145.4	21358.8	21783.3	16225.6
P36639;P36639-1;P36639-2;P36639-3	P36639;P36639-1;P36639-2;P36639-3	8ODP_HUMAN	NUDT1	Oxidized purine nucleoside triphosphate hydrolase	1530.43	1510.77	1144.66	1380.87
P36776;P36776-2	P36776;P36776-2;P36776-3	LONM_HUMAN	LONP1	Lon protease homolog, mitochondrial	2625	2530.48	2624.39	2201.3
P36871;P36871-2;P36871-3	P36871;P36871-2;P36871-3	PGM1_HUMAN	PGM1	Phosphoglucomutase-1	1778.15	1091.28	1638.93	1502.34
P36915;P36915-2	P36915;P36915-2	GNL1_HUMAN	GNL1	Guanine nucleotide-binding protein-like 1	400.323	238.403	423.814	492.679
P36957	P36957	ODO2_HUMAN	DLST	Dihydrolipoyllysine-residue succinyltransferase component of 2-oxoglutarate dehydrogenase complex, mitochondrial	3325.64	3519.59	4188.92	4170.38
P37108	P37108	SRP14_HUMAN	SRP14	Signal recognition particle 14 kDa protein	5158.42	6221.07	5804.34	6968.01
P37802;P37802-2	P37802;P37802-2	TAGL2_HUMAN	TAGLN2	Transgelin-2	1967.88	1274.34	1970.21	5310.93
P37837;P37837-2	P37837;P37837-2	TALDO_HUMAN	TALDO1	Transaldolase	12559	14844	14281.1	16577.5
P38117;P38117-2	P38117;P38117-2	ETFB_HUMAN	ETFB	Electron transfer flavoprotein subunit beta	2846.63	2421.12	3169.83	3514.52
P38159;P38159-3;Q96E39	P38159;Q96E39;P38159-2;P38159-3	RBMX_HUMAN;RMXL1_HUMAN	RBMX;RBMXL1	RNA-binding motif protein, X chromosome	5089.06	2849.24	3601.16	2736.65
P38606;P38606-2	P38606;P38606-2	VATA_HUMAN	ATP6V1A	V-type proton ATPase catalytic subunit A	2934.09	3330.94	3106.63	3057.59
P38646	P38646	GRP75_HUMAN	HSPA9	Stress-70 protein, mitochondrial	33172.1	29830.5	37325.6	35285.3
P38919	P38919	IF4A3_HUMAN	EIF4A3	Eukaryotic initiation factor 4A-III	7876.66	7857.49	8556.76	7694.17
P39019	P39019	RS19_HUMAN	RPS19	Small ribosomal subunit protein eS19	19675.8	7023.44	20293.1	16573.8
P39023	P39023	RL3_HUMAN	RPL3	Large ribosomal subunit protein uL3	6937.01	9345.14	9361.72	8869.86
P39656;P39656-3	P39656;P39656-2;P39656-3	OST48_HUMAN	DDOST	Dolichyl-diphosphooligosaccharide--protein glycosyltransferase 48 kDa subunit	26823	26417.7	25714.4	24578.8
P39748	P39748;P39748-2	FEN1_HUMAN	FEN1	Flap endonuclease 1	1555	1614.81	1411.29	1690.33
P40123	P40123;P40123-2	CAP2_HUMAN	CAP2	Adenylyl cyclase-associated protein 2	5688.16	7127.06	6258.19	5604.91
P40227	P40227;P40227-2	TCPZ_HUMAN	CCT6A	T-complex protein 1 subunit zeta	16447.4	18516.4	18941.8	17205.1
P40429	P40429;Q6NVV1	RL13A_HUMAN	RPL13A	Large ribosomal subunit protein uL13	15923.4	19610.4	19427.1	15280.9
P40616;P40616-2	P40616;P40616-2	ARL1_HUMAN	ARL1	ADP-ribosylation factor-like protein 1	16613.5	16725.7	15272	16200.5
P40692;P40692-3	P40692;P40692-3	MLH1_HUMAN	MLH1	DNA mismatch repair protein Mlh1	3507.79	2742.81	2631.5	2669.61
P40763;P40763-2;P40763-3	P40763;P40763-2;P40763-3	STAT3_HUMAN	STAT3	Signal transducer and activator of transcription 3	1224.35	1159.73	1198.01	906.486
P40818	P40818	UBP8_HUMAN	USP8	Ubiquitin carboxyl-terminal hydrolase 8	220546	211050	184590	13446.5
P40925;P40925-3	P40925;P40925-2;P40925-3	MDHC_HUMAN	MDH1	Malate dehydrogenase, cytoplasmic	10054.4	8735.71	8999.4	10980
P40926	P40926;P40926-2	MDHM_HUMAN	MDH2	Malate dehydrogenase, mitochondrial	25550	31452.8	24287.9	31853.7
P40937;P40937-2	P40937;P40937-2	RFC5_HUMAN	RFC5	Replication factor C subunit 5	2243.46	2544.46	2879.24	2963.39
P40938;P40938-2	P40938;P40938-2	RFC3_HUMAN	RFC3	Replication factor C subunit 3	1624.31	1293.49	1876.09	2129
P40939	P40939	ECHA_HUMAN	HADHA	Trifunctional enzyme subunit alpha, mitochondrial	9583.5	9245.51	9564.94	8261.15
P41091	P41091;Q2VIR3;Q2VIR3-2	IF2G_HUMAN	EIF2S3	Eukaryotic translation initiation factor 2 subunit 3	13557.4	14957.1	12476.5	15254.6
P41214;P41214-2	P41214;P41214-2	EIF2D_HUMAN	EIF2D	Eukaryotic translation initiation factor 2D	1308.63	1316.47	1383.47	1341.22
P41227;P41227-2	P41227;Q9BSU3;P41227-2	NAA10_HUMAN	NAA10	N-alpha-acetyltransferase 10	5946.76	5757.75	5207.35	5279.44
P41240	P41240	CSK_HUMAN	CSK	Tyrosine-protein kinase CSK	3622	3717.87	3388.63	3326.64
P41250;P41250-2	P41250;P41250-2	GARS_HUMAN	GARS1	Glycine--tRNA ligase	4769.25	7269.44	5228.69	5823.53
P41252	P41252	SYIC_HUMAN	IARS1	Isoleucine--tRNA ligase, cytoplasmic	26241.9	30207.5	28049.7	25704
P41743	P41743	KPCI_HUMAN	PRKCI	Protein kinase C iota type	3196.58	3305.58	3338.29	4279.77
P42126;P42126-2	P42126;P42126-2	ECI1_HUMAN	ECI1	Enoyl-CoA delta isomerase 1, mitochondrial	2936.03	3558.22	3620.4	3121.33
P42224	P42224;P42224-2	STAT1_HUMAN	STAT1	Signal transducer and activator of transcription 1-alpha/beta	4506.42	3697.74	4170.51	3748.8
P42262-4	P42262-4	GRIA2_HUMAN	GRIA2	Isoform 4 of Glutamate receptor 2			2762.37	2690.93
P42285	P42285	MTREX_HUMAN	MTREX	Exosome RNA helicase MTR4	2518.39	2426.98	2795	2105.22
P42345	P42345	MTOR_HUMAN	MTOR	Serine/threonine-protein kinase mTOR	2341.03	2194.13	2961.18	1323.76
P42356	P42356;A4QPH2;P42356-2;A4QPH2-2;A4QPH2-4	PI4KA_HUMAN	PI4KA	Phosphatidylinositol 4-kinase alpha	195.889	533.036	918.133	447.099
P42677	P42677;Q71UM5	RS27_HUMAN	RPS27	Small ribosomal subunit protein eS27	29545.8	26798.6	28102.5	23242.9
P42704	P42704	LPPRC_HUMAN	LRPPRC	Leucine-rich PPR motif-containing protein, mitochondrial	15933	11378.2	16778.3	13051.7
P42765	P42765	THIM_HUMAN	ACAA2	3-ketoacyl-CoA thiolase, mitochondrial	8146.11	11974.3	8407.26	10624
P42766	P42766	RL35_HUMAN	RPL35	Large ribosomal subunit protein uL29	8495.52	14842.9	10529.7	11708.2
P42858	P42858	HD_HUMAN	HTT	Huntingtin	1798.98	1924.32	1399.55	1218.63
P43007	P43007	SATT_HUMAN	SLC1A4	Neutral amino acid transporter A	1180.4	611.017	715.089
P43034	P43034	LIS1_HUMAN	PAFAH1B1	Platelet-activating factor acetylhydrolase IB subunit beta	4475.65	4895.64	4557.18	3865.88
P43246	P43246;P43246-2	MSH2_HUMAN	MSH2	DNA mismatch repair protein Msh2	6762.52	6692.91	7021.99	7040.37
P43304;P43304-2	P43304;P43304-2	GPDM_HUMAN	GPD2	Glycerol-3-phosphate dehydrogenase, mitochondrial	923.245	829.464	979.83	1167.03
P43487;P43487-2	P43487;P43487-2	RANG_HUMAN	RANBP1	Ran-specific GTPase-activating protein	2457.4	2203.71	3175.38	2595.7
P43490	P43490	NAMPT_HUMAN	NAMPT	Nicotinamide phosphoribosyltransferase	6449.34	6363.52	6273.11	6082.95
P43686;P43686-2	P43686;P43686-2	PRS6B_HUMAN	PSMC4	26S proteasome regulatory subunit 6B	3669.09	3606.35	4147.24	4300.3
P43897	P43897;P43897-2	EFTS_HUMAN	TSFM	Elongation factor Ts, mitochondrial	3895.37	4372.79	3404.69	3821.24
P45880	P45880;P45880-1;P45880-2	VDAC2_HUMAN	VDAC2	Voltage-dependent anion-selective channel protein 2	38299.4	43069.7	33966.9	40516.6
P45954;P45954-2	P45954;P45954-2	ACDSB_HUMAN	ACADSB	Short/branched chain specific acyl-CoA dehydrogenase, mitochondrial	1626.61	1564.26	1702.66	2197.64
P45974;P45974-2	P45974;P45974-2	UBP5_HUMAN	USP5	Ubiquitin carboxyl-terminal hydrolase 5	542567	506918	432931	28936.4
P45983;P45983-2;P45983-3;P45983-4;P45983-5;P45984;P45984-2;P45984-3;P45984-4;P45984-5;P53779;P53779-2;P53779-3	P45983;P45984;P53779;P45983-2;P45983-3;P45983-4;P45983-5;P45984-2;P45984-3;P45984-4;P45984-5;P53779-2;P53779-3	MK08_HUMAN;MK09_HUMAN;MK10_HUMAN	MAPK10;MAPK8;MAPK9	Mitogen-activated protein kinase 8	1696.71	1351.62	921.697	1273.37
P46013;P46013-2	P46013;P46013-2	KI67_HUMAN	MKI67	Proliferation marker protein Ki-67	1265.98	909.175	969.039	992.292
P46060	P46060	RAGP1_HUMAN	RANGAP1	Ran GTPase-activating protein 1	2137	1274.84	1931.61	1643.4
P46063	P46063	RECQ1_HUMAN	RECQL	ATP-dependent DNA helicase Q1	12394.8	9763.26	9421.5	10438.1
P46087;P46087-2;P46087-3;P46087-4	P46087;P46087-2;P46087-3;P46087-4	NOP2_HUMAN	NOP2	Probable 28S rRNA (cytosine(4447)-C(5))-methyltransferase	2247.5	1917.83	2171.34	2290.36
P46199	P46199	IF2M_HUMAN	MTIF2	Translation initiation factor IF-2, mitochondrial	1526.58	1679.25	1975.9	1740.48
P46379;P46379-2;P46379-3;P46379-4;P46379-5	P46379;P46379-2;P46379-3;P46379-4;P46379-5	BAG6_HUMAN	BAG6	Large proline-rich protein BAG6	3827.53	3163.05	4983.5	4624.35
P46459	P46459;P46459-2	NSF_HUMAN	NSF	Vesicle-fusing ATPase	6905.91	6850.06	7454.05	7127.81
P46734;P46734-2;P46734-3	P46734;P46734-2;P46734-3	MP2K3_HUMAN	MAP2K3	Dual specificity mitogen-activated protein kinase kinase 3	1158.41	1217.67	1663.87	1989.24
P46736;P46736-2;P46736-3;P46736-5	P46736;P46736-2;P46736-3;P46736-4;P46736-5	BRCC3_HUMAN	BRCC3	Lys-63-specific deubiquitinase BRCC36	2164.68	2533.21	2058.26	2099.26
P46776	P46776	RL27A_HUMAN	RPL27A	Large ribosomal subunit protein uL15	36839.9	38925.9	35681.2	33656.6
P46777	P46777	RL5_HUMAN	RPL5	Large ribosomal subunit protein uL18	25033.7	24231	26672.2	21013.5
P46778	P46778	RL21_HUMAN	RPL21	Large ribosomal subunit protein eL21	26066.4	28633.2	26732.4	25776.2
P46779;P46779-2;P46779-3;P46779-4;P46779-5	P46779;P46779-2;P46779-3;P46779-4;P46779-5	RL28_HUMAN	RPL28	Large ribosomal subunit protein eL28	4702.2	4495.23	3989.62	3066.08
P46781	P46781	RS9_HUMAN	RPS9	Small ribosomal subunit protein uS4	12722.2	27434.6	20007.9	20818.1
P46782	P46782	RS5_HUMAN	RPS5	Small ribosomal subunit protein uS7	10680.3	3314.77	11250.8	6979.3
P46783	P46783;Q9NQ39	RS10_HUMAN	RPS10	Small ribosomal subunit protein eS10	7378.69	1874.77	7250.75	5367.76
P46926	P46926;Q8TDQ7;Q8TDQ7-2;P46926-2;Q8TDQ7-3	GNPI1_HUMAN	GNPDA1	Glucosamine-6-phosphate isomerase 1	2465.96	2333.59	2542.38	2635.04
P46934-4	P46934-4	NEDD4_HUMAN	NEDD4	Isoform 4 of E3 ubiquitin-protein ligase NEDD4	866.2	1341.81	1292.81	646.547
P46940	P46940	IQGA1_HUMAN	IQGAP1	Ras GTPase-activating-like protein IQGAP1	95390.5	98033.6	103366	144734
P46976;P46976-2;P46976-3	P46976;P46976-2;P46976-3	GLYG_HUMAN	GYG1	Glycogenin-1	2688.65		1668.77	2188.54
P46977;P46977-2	P46977;P46977-2	STT3A_HUMAN	STT3A	Dolichyl-diphosphooligosaccharide--protein glycosyltransferase subunit STT3A	8299.58	8223.13	9476.64	7459.68
P47755	P47755	CAZA2_HUMAN	CAPZA2	F-actin-capping protein subunit alpha-2	4140.36	3843.62	3639.06	4269.68
P47756	P47756;P47756-1	CAPZB_HUMAN	CAPZB	F-actin-capping protein subunit beta	20641.6	21780.1	20692.5	21528.7
P47897	P47897;P47897-2	SYQ_HUMAN	QARS1	Glutamine--tRNA ligase	4543.92	4504.8	4674.8	4212.2
P47914	P47914	RL29_HUMAN	RPL29	Large ribosomal subunit protein eL29	1210.38	937.153	1937.03	935.997
P47985	P47985;P0C7P4	UCRI_HUMAN	UQCRFS1	Cytochrome b-c1 complex subunit Rieske, mitochondrial	2432.49	3446.44	2498.4	2920.96
P48047	P48047	ATPO_HUMAN	ATP5PO	ATP synthase subunit O, mitochondrial	3948.03	3545.34	4224.64	4054.15
P48147	P48147	PPCE_HUMAN	PREP	Prolyl endopeptidase	806.618	861.126	834.147	1211.38
P48163;P48163-2	P48163;P48163-2	MAOX_HUMAN	ME1	NADP-dependent malic enzyme		3110.05		3085.3
P48444	P48444	COPD_HUMAN	ARCN1	Coatomer subunit delta	9648.5	9420.75	9711.33	8502.07
P48449;P48449-2;P48449-3	P48449;P48449-2;P48449-3	LSS_HUMAN	LSS	Lanosterol synthase	1265.01	1730.39	1447.3	1589.41
P48506	P48506	GSH1_HUMAN	GCLC	Glutamate--cysteine ligase catalytic subunit	4216.55	4550.05	4566.19	4318.56
P48507	P48507	GSH0_HUMAN	GCLM	Glutamate--cysteine ligase regulatory subunit	1538.15	1452.97	1411.67	1285.83
P48556	P48556	PSMD8_HUMAN	PSMD8	26S proteasome non-ATPase regulatory subunit 8	3225.05	2629.4	4537.78	3172.11
P48637	P48637;P48637-2	GSHB_HUMAN	GSS	Glutathione synthetase	2307.35	3177.07	2453.45	2109.59
P48643;P48643-2	P48643;P48643-2	TCPE_HUMAN	CCT5	T-complex protein 1 subunit epsilon	17873	17419.9	18319.6	19981.1
P48651;P48651-2;P48651-3	P48651;P48651-2;P48651-3	PTSS1_HUMAN	PTDSS1	Phosphatidylserine synthase 1	1351.69	1868.94	1541.51	1572.83
P48729;P48729-3	P48729;Q8N752;P48729-2;P48729-3	KC1A_HUMAN	CSNK1A1	Casein kinase I isoform alpha	9244.7	9573.88	8252.9	7907.85
P48730;P48730-2;P49674	P48730;P48730-2;P49674	KC1D_HUMAN;KC1E_HUMAN	CSNK1D;CSNK1E	Casein kinase I isoform delta	2118.72	2825.87	3695.8
P48735	P48735;P48735-2	IDHP_HUMAN	IDH2	Isocitrate dehydrogenase [NADP], mitochondrial	10347.5	11491.6	11438.7	10973
P48740-2;P48740-4	P48740-2;P48740-4	MASP1_HUMAN	MASP1	Isoform 2 of Mannan-binding lectin serine protease 1	9161.26	12070.7	7112.91	13143.8
P49005	P49005	DPOD2_HUMAN	POLD2	DNA polymerase delta subunit 2	2900.76	2070.62	2061.91	2621.75
P49189	P49189;P49189-2;P49189-3	AL9A1_HUMAN	ALDH9A1	4-trimethylaminobutyraldehyde dehydrogenase	4055.81	5652.15	4015.53	5097.11
P49207	P49207	RL34_HUMAN	RPL34	Large ribosomal subunit protein eL34	3902.85	3583.13	4456.72	3025.77
P49257	P49257	LMAN1_HUMAN	LMAN1	Protein ERGIC-53	2950.79	3067.76	2621.31	3398.22
P49327	P49327	FAS_HUMAN	FASN	Fatty acid synthase	90430.9	91622.5	88496.1	109305
P49366	P49366;P49366-3	DHYS_HUMAN	DHPS	Deoxyhypusine synthase	1656.27	1592.18	2116.59	1716.85
P49368	P49368;P49368-2	TCPG_HUMAN	CCT3	T-complex protein 1 subunit gamma	18664.5	14617.1	19277.8	17360.5
P49406	P49406	RM19_HUMAN	MRPL19	Large ribosomal subunit protein bL19m	6247.42	6182.74	6534.05	6525.8
P49407;P49407-2	P49407;P49407-2	ARRB1_HUMAN	ARRB1	Beta-arrestin-1	2870.59	2610.39	2513.47	2926.68
P49411	P49411	EFTU_HUMAN	TUFM	Elongation factor Tu, mitochondrial	41021.8	40933.8	39915.8	39453.6
P49419;P49419-2	P49419;P49419-2;P49419-4	AL7A1_HUMAN	ALDH7A1	Alpha-aminoadipic semialdehyde dehydrogenase	1629.73	1951.59	1424.55	2049.84
P49458	P49458	SRP09_HUMAN	SRP9	Signal recognition particle 9 kDa protein	6980.93	5521.37	5158.34	6023.07
P49585	P49585;Q9Y5K3;Q9Y5K3-2;Q9Y5K3-3;Q9Y5K3-4	PCY1A_HUMAN	PCYT1A	Choline-phosphate cytidylyltransferase A	1823.5	1418.79	1807.63	2244.04
P49588	P49588;P49588-2	SYAC_HUMAN	AARS1	Alanine--tRNA ligase, cytoplasmic	11474.6	9781.88	11676.3	12601.4
P49589;P49589-2;P49589-3	P49589;P49589-2;P49589-3	SYCC_HUMAN	CARS1	Cysteine--tRNA ligase, cytoplasmic	1285.61	1860.81	2440.69	1114.07
P49591	P49591	SYSC_HUMAN	SARS1	Serine--tRNA ligase, cytoplasmic	7736.34	8077.95	7704.24	7540.33
P49642	P49642	PRI1_HUMAN	PRIM1	DNA primase small subunit	976.974	1284.38	1242.82	965.438
P49720	P49720	PSB3_HUMAN	PSMB3	Proteasome subunit beta type-3	6169.63	8489.52	5400.31	8064.27
P49721	P49721	PSB2_HUMAN	PSMB2	Proteasome subunit beta type-2	2466.25	3712.41	3076.83	3830.95
P49736	P49736	MCM2_HUMAN	MCM2	DNA replication licensing factor MCM2	22432.8	20300.7	21630.2	20963.6
P49748;P49748-2;P49748-3	P49748;P49748-2;P49748-3	ACADV_HUMAN	ACADVL	Very long-chain specific acyl-CoA dehydrogenase, mitochondrial	1276.76	1434.25	2029.5	1765.43
P49755	P49755	TMEDA_HUMAN	TMED10	Transmembrane emp24 domain-containing protein 10	8669.12	8901.44	8369.94	10070.3
P49773	P49773	HINT1_HUMAN	HINT1	Adenosine 5'-monophosphoramidase HINT1	1220.11	1130.9	1100.73	1162.06
P49792	P49792	RBP2_HUMAN	RANBP2	E3 SUMO-protein ligase RanBP2	1765.17	1796.03	2085.87	2237.07
P49821;P49821-2	P49821;P49821-2	NDUV1_HUMAN	NDUFV1	NADH dehydrogenase [ubiquinone] flavoprotein 1, mitochondrial	915.049	904.787	924.721	852.996
P49840	P49840	GSK3A_HUMAN	GSK3A	Glycogen synthase kinase-3 alpha	6125.46	5671.92	5350.68	5943.22
P49841;P49841-2	P49841;P49841-2	GSK3B_HUMAN	GSK3B	Glycogen synthase kinase-3 beta	1086.91	989.683	685.751	1109.5
P49915	P49915;P49915-2	GUAA_HUMAN	GMPS	GMP synthase [glutamine-hydrolyzing]	18178.4	17110.2	19834.1	16590.2
P49916;P49916-3	P49916;P49916-3	DNLI3_HUMAN	LIG3	DNA ligase 3	3761.67	3249.6	2891.39	2972.4
P49959;P49959-2;P49959-3	P49959;P49959-2;P49959-3	MRE11_HUMAN	MRE11	Double-strand break repair protein MRE11	2459.13	2612.01	2992.45	2841
P50213;P50213-2	P50213;P50213-2	IDH3A_HUMAN	IDH3A	Isocitrate dehydrogenase [NAD] subunit alpha, mitochondrial	1396.57	1631.06	1644.54	1263.01
P50395	P50395;P50395-2	GDIB_HUMAN	GDI2	Rab GDP dissociation inhibitor beta	45555.6	48227.9	45669	49991.9
P50402	P50402	EMD_HUMAN	EMD	Emerin	268.849	556.033		552.228
P50416	P50416;P50416-2	CPT1A_HUMAN	CPT1A	Carnitine O-palmitoyltransferase 1, liver isoform	11872.9	12161.2	11595.1	12072.2
P50443	P50443	S26A2_HUMAN	SLC26A2	Sulfate transporter	3875.53	4069.8	3673.91	2935.42
P50454	P50454	SERPH_HUMAN	SERPINH1	Serpin H1	27606.7	30145.9	28352.7	29014.4
P50502;Q8IZP2;Q8NFI4	P50502;Q8IZP2;Q8NFI4	F10A1_HUMAN;F10A5_HUMAN;ST134_HUMAN	ST13;ST13P4;ST13P5	Hsc70-interacting protein	1115.36		1930.55	1664.9
P50552	P50552	VASP_HUMAN	VASP	Vasodilator-stimulated phosphoprotein	8748.41	6474.29	6992.76	5182.36
P50570;P50570-5	P50570;P50570-2;Q9UQ16;P50570-3;P50570-4;P50570-5;Q9UQ16-2;Q9UQ16-3;Q9UQ16-4	DYN2_HUMAN	DNM2	Dynamin-2	7137.49	7366.61	7807.18	5819.4
P50579;P50579-2;P50579-3	P50579;P50579-2;P50579-3	MAP2_HUMAN	METAP2	Methionine aminopeptidase 2	986.366	1738.74	1357.55	1230.49
P50748	P50748;P50748-2	KNTC1_HUMAN	KNTC1	Kinetochore-associated protein 1	1731.42	872.539	1380.61	843.201
P50750;P50750-2	P50750;P50750-2	CDK9_HUMAN	CDK9	Cyclin-dependent kinase 9	3562.74	1100.75	2688.9	1573.19
P50851-2	P50851;P50851-2	LRBA_HUMAN	LRBA	Isoform 2 of Lipopolysaccharide-responsive and beige-like anchor protein	5428.03	4797.39	5204.32	4563.85
P50914	P50914	RL14_HUMAN	RPL14	Large ribosomal subunit protein eL14	19547.9	23168.6	21540.5	18654.3
P50990;P50990-2	P50990;P50990-2;P50990-3	TCPQ_HUMAN	CCT8	T-complex protein 1 subunit theta	22217.6	20875.6	24708.7	23606.3
P50991	P50991;P50991-2	TCPD_HUMAN	CCT4	T-complex protein 1 subunit delta	16589.2	16811.2	20749.9	19792.5
P50995;P50995-2	P50995;P50995-2	ANX11_HUMAN	ANXA11	Annexin A11	1885.29	1889.26	1739.85	1461.93
P51003	P51003;P51003-2	PAPOA_HUMAN	PAPOLA	Poly(A) polymerase alpha	4185.02	3766.11	3975.49	3549.44
P51114;P51114-2	P51114;P51114-2;P51114-3	FXR1_HUMAN	FXR1	RNA-binding protein FXR1	17467.8	14699.4	17061.8	18531.1
P51116	P51116	FXR2_HUMAN	FXR2	RNA-binding protein FXR2	1334.05	1219.99	1794.02	968.335
P51148;P51148-2	P20339;P51148;P61020;P51148-2;P20339-2;P61020-2	RAB5C_HUMAN	RAB5C	Ras-related protein Rab-5C	42059.1	70503.3	54015.3	58987.2
P51149	P51149	RAB7A_HUMAN	RAB7A	Ras-related protein Rab-7a	12990.3	17290.7	14136.6	15648.7
P51153	P51153	RAB13_HUMAN	RAB13	Ras-related protein Rab-13	11035.3	11356.3	11074.6	11565.5
P51532;P51532-2;P51532-3;P51532-4;P51532-5	P51532;P51532-2;P51532-3;P51532-4;P51532-5	SMCA4_HUMAN	SMARCA4	Transcription activator BRG1	1787.38	1337.68	2097.99	1466.73
P51553;P51553-2	P51553;P51553-2	IDH3G_HUMAN	IDH3G	Isocitrate dehydrogenase [NAD] subunit gamma, mitochondrial	1910.95	2016.64	2574.46	1781.1
P51570	P51570	GALK1_HUMAN	GALK1	Galactokinase	3131.58	2451.87	2892.03	2768.59
P51571	P51571	SSRD_HUMAN	SSR4	Translocon-associated protein subunit delta	10619.5	8573.6	10010.5	10638.8
P51610;P51610-2;P51610-4	P51610;P51610-2;P51610-3;P51610-4	HCFC1_HUMAN	HCFC1	Host cell factor 1	3765.59	3414.79	3906.07	3758.46
P51649;P51649-2	P51649;P51649-2	SSDH_HUMAN	ALDH5A1	Succinate-semialdehyde dehydrogenase, mitochondrial	1771.79	1782.72	1864.38	1586.55
P51659	P51659	DHB4_HUMAN	HSD17B4	Peroxisomal multifunctional enzyme type 2	14917	14744.7	15438.5	15430.9
P51665	P51665	PSMD7_HUMAN	PSMD7	26S proteasome non-ATPase regulatory subunit 7	3572.74	3098.4	3828.72	4222.7
P51668;Q9Y2X8	P51668;Q9Y2X8	UB2D1_HUMAN;UB2D4_HUMAN	UBE2D1;UBE2D4	Ubiquitin-conjugating enzyme E2 D1	2047.36	3171.2	2105.52	3483.98
P51784	P51784	UBP11_HUMAN	USP11	Ubiquitin carboxyl-terminal hydrolase 11	13418.7	13107.3	11929.2	738.255
P51809;P51809-2;P51809-3	P51809;P51809-2;P51809-3	VAMP7_HUMAN	VAMP7	Vesicle-associated membrane protein 7	1205.46	1290.35	1290.06	1171.37
P51812	P51812	KS6A3_HUMAN	RPS6KA3	Ribosomal protein S6 kinase alpha-3	3428.62	3357.58	3407.49	3433.04
P51965;P51965-2;P51965-3;Q969T4;Q96LR5	P51965;Q969T4;Q96LR5;P51965-2;P51965-3	UB2E1_HUMAN;UB2E2_HUMAN;UB2E3_HUMAN	UBE2E1;UBE2E2;UBE2E3	Ubiquitin-conjugating enzyme E2 E1	5218.47	5755.81	5470.78	4436.12
P51991;P51991-2	P51991;P51991-2	ROA3_HUMAN	HNRNPA3	Heterogeneous nuclear ribonucleoprotein A3	5578.62	6640.6	5704.72	5560.12
P52209;P52209-2	P52209;P52209-2	6PGD_HUMAN	PGD	6-phosphogluconate dehydrogenase, decarboxylating	17077.6	16715.8	22023.8	18880.8
P52272;P52272-2	P52272;P52272-2	HNRPM_HUMAN	HNRNPM	Heterogeneous nuclear ribonucleoprotein M	10443.7	8206.46	10971.6	9957.86
P52292	P52292	IMA1_HUMAN	KPNA2	Importin subunit alpha-1	3735.64	2888.84	4030.21	2766.29
P52298	P52298;P52298-2	NCBP2_HUMAN	NCBP2	Nuclear cap-binding protein subunit 2	4740.43	2480.57	4064.38	3019.48
P52434;P52434-3	P52434;P52434-2;P52434-3;P52434-5	RPAB3_HUMAN	POLR2H	DNA-directed RNA polymerases I, II, and III subunit RPABC3	12011.2	8942.75	10087.5	9124.11
P52564	P46734;P52564;P46734-2;P46734-3;P52564-2	MP2K6_HUMAN	MAP2K6	Dual specificity mitogen-activated protein kinase kinase 6	1200.6	1085.81	855.027	1052.53
P52565	P52565;P52565-2	GDIR1_HUMAN	ARHGDIA	Rho GDP-dissociation inhibitor 1	28866.2	24712.5	23852.4	28679
P52594;P52594-2;P52594-3;P52594-4	P52594;P52594-2;P52594-3;P52594-4	AGFG1_HUMAN	AGFG1	Arf-GAP domain and FG repeat-containing protein 1	365.728		190.925
P52597	P52597	HNRPF_HUMAN	HNRNPF	Heterogeneous nuclear ribonucleoprotein F	5166.45	3843.75	5583.76	5839.19
P52701	P52701;P52701-2;P52701-3;P52701-4	MSH6_HUMAN	MSH6	DNA mismatch repair protein Msh6	8715.58	9108.33	9331.77	8216.47
P52732	P52732	KIF11_HUMAN	KIF11	Kinesin-like protein KIF11	903.195	1364.74	1303.72	1356.63
P52735;P52735-2;P52735-3	P52735;P52735-2;P52735-3	VAV2_HUMAN	VAV2	Guanine nucleotide exchange factor VAV2	1907.58	1713.38	1771.32	1825.97
P52788;P52788-2	P52788;P52788-2	SPSY_HUMAN	SMS	Spermine synthase	1524.04	1849.97	1608.16	1106.5
P52789	P52789	HXK2_HUMAN	HK2	Hexokinase-2	1125.75	917.228	2055.05	1271.51
P52815	P52815	RM12_HUMAN	MRPL12	Large ribosomal subunit protein bL12m	649.446		746.908	1146.22
P52888	P52888	THOP1_HUMAN	THOP1	Thimet oligopeptidase	3566.85	4784.64	4900.34	4418.44
P52895	P52895	AK1C2_HUMAN	AKR1C2	Aldo-keto reductase family 1 member C2	1150.61	1132.32	1465.41	1447.28
P52907	P47755;P52907;P47755-2	CAZA1_HUMAN	CAPZA1	F-actin-capping protein subunit alpha-1	31604.8	31413.5	32093.1	28359.7
P53004	P53004	BIEA_HUMAN	BLVRA	Biliverdin reductase A	21955.6	20596.5	20962.1	19774.8
P53007	P53007	TXTP_HUMAN	SLC25A1	Tricarboxylate transport protein, mitochondrial	5071.21	4466.83	5937.66	5291.82
P53041	P53041	PPP5_HUMAN	PPP5C	Serine/threonine-protein phosphatase 5	1147.84	1405.79	1258.33	1247.85
P53370;P53370-2	P53370;P53370-2	NUDT6_HUMAN	NUDT6	Nucleoside diphosphate-linked moiety X motif 6	414.039	315.236	531.426	417.087
P53396;P53396-2	P53396;P53396-2	ACLY_HUMAN	ACLY	ATP-citrate synthase	30687.3	31292.8	31248.2	30348.1
P53582	P53582	MAP11_HUMAN	METAP1	Methionine aminopeptidase 1	3881.54	3505.99	2449.2	3304.83
P53597	P53597	SUCA_HUMAN	SUCLG1	Succinate--CoA ligase [ADP/GDP-forming] subunit alpha, mitochondrial	3928.92	4916.31	3526.3	5215.42
P53602	P53602	MVD1_HUMAN	MVD	Diphosphomevalonate decarboxylase	8547.28	6716.17	7615.04	8458.83
P53611	P53611	PGTB2_HUMAN	RABGGTB	Geranylgeranyl transferase type-2 subunit beta	1938.35	2169.04	1945.28	1522.43
P53618	P53618	COPB_HUMAN	COPB1	Coatomer subunit beta	13287	13245.1	11746.8	12799.5
P53621;P53621-2	P53621;P53621-2	COPA_HUMAN	COPA	Coatomer subunit alpha	18244.4	17048.9	16435.7	14518.7
P53680	P53680;P53680-2	AP2S1_HUMAN	AP2S1	AP-2 complex subunit sigma	4676.27	3231.54	4416.27	4166.67
P53985;P53985-2	P53985;P53985-2	MOT1_HUMAN	SLC16A1	Monocarboxylate transporter 1	1674.21	1908.35	1770.33	1215.16
P53992	P53992	SC24C_HUMAN	SEC24C	Protein transport protein Sec24C	5953.05	5432.48	5219.58	5460.22
P53999	P53999	TCP4_HUMAN	SUB1	Activated RNA polymerase II transcriptional coactivator p15	2554.29	2335.58	2275.71	2404.3
P54136	P54136;P54136-2	SYRC_HUMAN	RARS1	Arginine--tRNA ligase, cytoplasmic	17130.6	14160.8	18521.3	16899.5
P54252;P54252-1;P54252-3;P54252-4;P54252-5	P54252;P54252-1;P54252-3;P54252-4;P54252-5	ATX3_HUMAN	ATXN3	Ataxin-3	2005.28	1467.96	2173.64	930.13
P54577	P54577	SYYC_HUMAN	YARS1	Tyrosine--tRNA ligase, cytoplasmic	5268.2	4276.36	4612.67	4912.46
P54578;P54578-2	P54578;P54578-2;P54578-3	UBP14_HUMAN	USP14	Ubiquitin carboxyl-terminal hydrolase 14	222473	223470	184739	14133.9
P54619;P54619-2;P54619-3	P54619;P54619-2;P54619-3	AAKG1_HUMAN	PRKAG1	5'-AMP-activated protein kinase subunit gamma-1	2572.38	2775.72	2250.5	2383.17
P54652	P54652	HSP72_HUMAN	HSPA2	Heat shock-related 70 kDa protein 2	2266.06	1941.81	1960.96	1615.26
P54709	P54709	AT1B3_HUMAN	ATP1B3	Sodium/potassium-transporting ATPase subunit beta-3	2558.04	2505.62	2434.53	3377.68
P54727	P54727	RD23B_HUMAN	RAD23B	UV excision repair protein RAD23 homolog B	375.401	539.247	557.691	852.751
P54753	P54753;P54762;P54764;Q9UF33;P54762-5;P54764-2	EPHB3_HUMAN	EPHB3	Ephrin type-B receptor 3	2591.76	2386.99	2638.33	2600.81
P54760	P29322;P54756;P54760;P54756-2;P54756-3	EPHB4_HUMAN	EPHB4	Ephrin type-B receptor 4	5758.03	5399.32	5661.04	5218.74
P54819;P54819-2;P54819-5;P54819-6	P54819;P54819-2;P54819-5;P54819-6	KAD2_HUMAN	AK2	Adenylate kinase 2, mitochondrial	1098.6	1649.4	1797.01	1692.2
P54886;P54886-2	P54886;P54886-2	P5CS_HUMAN	ALDH18A1	Delta-1-pyrroline-5-carboxylate synthase	9936.64	10912.2	9791.73	11020.7
P55036;P55036-2	P55036;P55036-2	PSMD4_HUMAN	PSMD4	26S proteasome non-ATPase regulatory subunit 4	1942.45	2187.69	2280.49	2029.23
P55039	P55039	DRG2_HUMAN	DRG2	Developmentally-regulated GTP-binding protein 2	6220.02	4588.62	6382.86	5050.17
P55060;P55060-3	P55060;P55060-3;P55060-4	XPO2_HUMAN	CSE1L	Exportin-2	13870.5	7347.27	14014.6	9936.34
P55061;P55061-2	P55061;P55061-2	BI1_HUMAN	TMBIM6	Bax inhibitor 1	1318.1	1438.59	1139.17	869.023
P55072	P55072	TERA_HUMAN	VCP	Transitional endoplasmic reticulum ATPase	26258.7	26366.7	31523.8	32176
P55084;P55084-2	P55084;P55084-2	ECHB_HUMAN	HADHB	Trifunctional enzyme subunit beta, mitochondrial	15604.7	16307.7	14653.8	14885.8
P55209-3	P55209-3	NP1L1_HUMAN	NAP1L1	Isoform 3 of Nucleosome assembly protein 1-like 1		410.524	273.68	502.194
P55209;P55209-2	P55209;P55209-2	NP1L1_HUMAN	NAP1L1	Nucleosome assembly protein 1-like 1	2353.14	2582.78	3238.27	3214.32
P55210;P55210-3;P55210-4	P55210;P55210-3;P55210-4	CASP7_HUMAN	CASP7	Caspase-7	1614.22	2154.72	2338.73	2000.16
P55212;P55212-2	P55212;P55212-2	CASP6_HUMAN	CASP6	Caspase-6	9951.9	10736.7	8861.69	9025.38
P55263;P55263-2;P55263-3	P55263;P55263-2;P55263-3;P55263-4	ADK_HUMAN	ADK	Adenosine kinase	4824.56	5268.09	4252.42	4511.19
P55265;P55265-4;P55265-5	P55265;P55265-2;P55265-3;P55265-4;P55265-5	DSRAD_HUMAN	ADAR	Double-stranded RNA-specific adenosine deaminase	2322.31	2450.02	2669.74	2606.09
P55327;P55327-2;P55327-3;P55327-4;P55327-5;P55327-6;P55327-7	P55327;P55327-2;P55327-3;P55327-4;P55327-5;P55327-6;P55327-7	TPD52_HUMAN	TPD52	Tumor protein D52				1055.59
P55735;P55735-2;P55735-3;P55735-4	P55735;P55735-3;P55735-2;P55735-4	SEC13_HUMAN	SEC13	Protein SEC13 homolog	9616.59	10022.4	9402.63	10424.8
P55769	P55769	NH2L1_HUMAN	SNU13	NHP2-like protein 1	383.755		507.133	984.468
P55786	P55786;P55786-2	PSA_HUMAN	NPEPPS	Puromycin-sensitive aminopeptidase	15360.6	14974.4	16038.1	15190.8
P55795	P55795	HNRH2_HUMAN	HNRNPH2	Heterogeneous nuclear ribonucleoprotein H2	7227.66	5621.1	7607.36	6070.09
P55809;P55809-2;Q9BYC2	P55809;Q9BYC2;P55809-2	SCOT1_HUMAN;SCOT2_HUMAN	OXCT1;OXCT2	Succinyl-CoA:3-ketoacid coenzyme A transferase 1, mitochondrial	606.499	885.196	752.867	549.766
P55854;P55854-2;P61956;P61956-2;Q6EEV6	P55854;P61956;Q6EEV6;P55854-2;P61956-2	SUMO2_HUMAN;SUMO3_HUMAN;SUMO4_HUMAN	SUMO2;SUMO3;SUMO4	Small ubiquitin-related modifier 3			1445.39	3856.31
P55884;P55884-2	P55884;P55884-2	EIF3B_HUMAN	EIF3B	Eukaryotic translation initiation factor 3 subunit B	25425.6	29306.1	26703.2	29899.1
P56134;P56134-2;P56134-3;P56134-4	P56134;P56134-2;P56134-3;P56134-4	ATPK_HUMAN	ATP5MF	ATP synthase subunit f, mitochondrial	2411.13	2493.43	2716.64	2965.33
P56159-2	P56159-2	GFRA1_HUMAN	GFRA1	Isoform 2 of GDNF family receptor alpha-1	3919.2	3141.79	4168.38	3068.67
P56192	P56192;P56192-2	SYMC_HUMAN	MARS1	Methionine--tRNA ligase, cytoplasmic	10524.7	9065.59	10373.4	10501
P56282;P56282-2;P56282-3	P56282;P56282-2;P56282-3	DPOE2_HUMAN	POLE2	DNA polymerase epsilon subunit 2				98.2927
P56537	P56537	IF6_HUMAN	EIF6	Eukaryotic translation initiation factor 6	11089	10370.6	9791.14	10071.5
P56545;P56545-2;P56545-3	P56545;P56545-3;P56545-2	CTBP2_HUMAN	CTBP2	C-terminal-binding protein 2	10217.6	9809.76	10944.9	8835.87
P56945;P56945-2;P56945-3;P56945-5;P56945-6;P56945-7;P56945-8	P56945;P56945-2;P56945-3;P56945-4;P56945-5;P56945-6;P56945-7;P56945-8	BCAR1_HUMAN	BCAR1	Breast cancer anti-estrogen resistance protein 1	3871.95	3484.99	1844.75	14678.8
P57081;P57081-2;P57081-3	P57081;P57081-2;P57081-3	WDR4_HUMAN	WDR4	tRNA (guanine-N(7)-)-methyltransferase non-catalytic subunit WDR4	2826.26	2855.62	3144.95	2773.84
P57088	P57088	TMM33_HUMAN	TMEM33	Transmembrane protein 33	8554.04	10008.5	7859.66	7254.43
P57678	P57678	GEMI4_HUMAN	GEMIN4	Gem-associated protein 4	2983.79	2201.41	2274	2103.17
P57735	P57735	RAB25_HUMAN	RAB25	Ras-related protein Rab-25	6796.26	9446.46	7198.96	7309.06
P57772;P57772-2	P57772;P57772-2	SELB_HUMAN	EEFSEC	Selenocysteine-specific elongation factor	1848.3	1973.17	1213.58	1694.77
P58107	P58107	EPIPL_HUMAN	EPPK1	Epiplakin	2814.23	2325.4	3007.96	2574.52
P59998;P59998-2;P59998-3	P59998;P59998-2;P59998-3	ARPC4_HUMAN	ARPC4	Actin-related protein 2/3 complex subunit 4	26079.7	23254.2	25125.7	21765.7
P60174;P60174-3	P60174;P60174-3;P60174-4	TPIS_HUMAN	TPI1	Triosephosphate isomerase	18518.1	21387.2	23802.1	26635.5
P60228	P60228	EIF3E_HUMAN	EIF3E	Eukaryotic translation initiation factor 3 subunit E	2435.37	1728.67	2367.53	1756.02
P60510	P60510	PP4C_HUMAN	PPP4C	Serine/threonine-protein phosphatase 4 catalytic subunit	4909.98	5633.13	4420.38	4179.32
P60660;P60660-2	P60660;P60660-2	MYL6_HUMAN	MYL6	Myosin light polypeptide 6		845.567	937.856	1124.83
P60709;P63261	P60709;P62736;P63261;P63267;P68032;Q562R1;P63267-2	ACTB_HUMAN;ACTG_HUMAN	ACTB;ACTG1	Actin, cytoplasmic 1	390687	370051	401130	439360
P60763	P60763	RAC3_HUMAN	RAC3	Ras-related C3 botulinum toxin substrate 3	1086.68	1728.99	1596.16	1009.4
P60842	P60842;P60842-2	IF4A1_HUMAN	EIF4A1	Eukaryotic initiation factor 4A-I	146571	155994	150265	157410
P60866;P60866-2	P60866;P60866-2	RS20_HUMAN	RPS20	Small ribosomal subunit protein uS10	13438.5	11432.6	12650.6	11831
P60900	P60900;P60900-2;P60900-3	PSA6_HUMAN	PSMA6	Proteasome subunit alpha type-6	8609.65	11529	8553.5	9922.73
P60953	P60953	CDC42_HUMAN	CDC42	Cell division control protein 42 homolog	1909.33	2153.26	1777.65	2619.13
P60981;P60981-2	P60981;P60981-2	DEST_HUMAN	DSTN	Destrin	24837.6	20599.8	23857.2	21861.7
P60983	P60983	GMFB_HUMAN	GMFB	Glia maturation factor beta	988.614	1157.96	957.503	1049.31
P61006	P61006;P61006-2	RAB8A_HUMAN	RAB8A	Ras-related protein Rab-8A	2006.57	2010.37	2333.59	2182.93
P61009	P61009	SPCS3_HUMAN	SPCS3	Signal peptidase complex subunit 3	5748.3	4434.55	3734.79	3853.69
P61011;P61011-2	P61011;P61011-2	SRP54_HUMAN	SRP54	Signal recognition particle subunit SRP54	2591.9	2160.95	2602.66	2497.85
P61019	P61019;Q8WUD1	RAB2A_HUMAN	RAB2A	Ras-related protein Rab-2A	19927.4	18640.5	16527	19790.9
P61020;P61020-2	P61020;P61020-2	RAB5B_HUMAN	RAB5B	Ras-related protein Rab-5B	464.886	1229.63	826.29	607.329
P61026	P61026	RAB10_HUMAN	RAB10	Ras-related protein Rab-10	5622.88	5622.21	4524.55	4560.71
P61077;P61077-2	P61077;P62837;P62837-2;P61077-2;P61077-3	UB2D3_HUMAN	UBE2D3	Ubiquitin-conjugating enzyme E2 D3	28312.7	26326.1	24397.9	24025.5
P61081	P61081	UBC12_HUMAN	UBE2M	NEDD8-conjugating enzyme Ubc12	10182.4	8285.01	10431.3	9689.01
P61086;P61086-3	P61086;P61086-3	UBE2K_HUMAN	UBE2K	Ubiquitin-conjugating enzyme E2 K	1365.19	871.279	1792.3	2151.46
P61088	P61088;Q5JXB2	UBE2N_HUMAN	UBE2N	Ubiquitin-conjugating enzyme E2 N	5164.85	4985.08	3995.09	5867.85
P61106	P61106	RAB14_HUMAN	RAB14	Ras-related protein Rab-14	10984.3	11963.6	9856.23	10797.5
P61158	P61158	ARP3_HUMAN	ACTR3	Actin-related protein 3	9455.95	9600.31	9968.46	10081.1
P61160	P61160	ARP2_HUMAN	ACTR2	Actin-related protein 2	12566.3	13768.1	13845.1	15037.2
P61163	P42025;P61163	ACTZ_HUMAN	ACTR1A	Alpha-centractin	2342.86	1529.51	1638.14	2647.81
P61201;P61201-2	P61201;P61201-2	CSN2_HUMAN	COPS2	COP9 signalosome complex subunit 2	1832.48	1666.94	2035.96	1702.12
P61204;P84077	P61204;P84077;P61204-2	ARF1_HUMAN;ARF3_HUMAN	ARF1;ARF3	ADP-ribosylation factor 3	26907.2	36812.1	28792.5	30323.4
P61221	P61221	ABCE1_HUMAN	ABCE1	ATP-binding cassette sub-family E member 1	11300.3	9542.99	11267.2	9108.76
P61225	P10114;P61225;Q9Y3L5	RAP2B_HUMAN	RAP2B	Ras-related protein Rap-2b	1364.57	1852.61	1482.84	1547.87
P61247	P61247	RS3A_HUMAN	RPS3A	Small ribosomal subunit protein eS1	19008.8	16686.7	16994.3	14272
P61254	P61254;Q9UNX3	RL26_HUMAN	RPL26	Large ribosomal subunit protein uL24	51181.2	62078.7	50311.7	50558
P61289;P61289-2;P61289-3	P61289;P61289-2;P61289-3	PSME3_HUMAN	PSME3	Proteasome activator complex subunit 3		498.069	1003.94	1159.04
P61313	P61313	RL15_HUMAN	RPL15	Large ribosomal subunit protein eL15	2285.32	2806.91	2651.2	2579.93
P61326;P61326-2;Q96A72	P61326;Q96A72;P61326-2	MGN2_HUMAN;MGN_HUMAN	MAGOH;MAGOHB	Protein mago nashi homolog	4385.16	5362.61	4880.89	3556.95
P61353	P61353	RL27_HUMAN	RPL27	Large ribosomal subunit protein eL27	56821.8	58308.2	52727.9	51761
P61421	P61421	VA0D1_HUMAN	ATP6V0D1	V-type proton ATPase subunit d 1	2926.62	2928.28	3537.13	3038.02
P61513	P61513	RL37A_HUMAN	RPL37A	Large ribosomal subunit protein eL43	9642.7	10448.1	10189.5	8782.19
P61586	P61586	RHOA_HUMAN	RHOA	Transforming protein RhoA	5073.81	5345.41	4727.45	5366.64
P61604	P61604	CH10_HUMAN	HSPE1	10 kDa heat shock protein, mitochondrial	8122.84	6512.91	8311.12	19049.1
P61619	P61619;Q9H9S3;Q9H9S3-2;Q9H9S3-3	S61A1_HUMAN	SEC61A1	Protein transport protein Sec61 subunit alpha isoform 1	5126.01	3129.54	3638.7	3214.13
P61758;P61758-2	P61758;P61758-2	PFD3_HUMAN	VBP1	Prefoldin subunit 3	3964.54	3705.8	3750.82	4336.21
P61803	P61803	DAD1_HUMAN	DAD1	Dolichyl-diphosphooligosaccharide--protein glycosyltransferase subunit DAD1	2019.3	2947.97	1919.58	2886.85
P61923;P61923-4	P61923;P61923-4;P61923-5	COPZ1_HUMAN	COPZ1	Coatomer subunit zeta-1	2450.2	3356.36	2670.19	2788.27
P61960	P61960	UFM1_HUMAN	UFM1	Ubiquitin-fold modifier 1	2187.77	1132.96	1464.55	2005.08
P61962	P61962	DCAF7_HUMAN	DCAF7	DDB1- and CUL4-associated factor 7	2236.24	3106.19	2549.69	2805.11
P61966	P61966;P61966-2	AP1S1_HUMAN	AP1S1	AP-1 complex subunit sigma-1A	8461.29	8663.82	9140.94	8293.61
P61970	P61970	NTF2_HUMAN	NUTF2	Nuclear transport factor 2	2883.4	3633.61	3138.19	3172.35
P61978-3	P61978;P61978-2;P61978-3	HNRPK_HUMAN	HNRNPK	Isoform 3 of Heterogeneous nuclear ribonucleoprotein K	12520.5	10394	12409.7	13672.5
P61981	P61981	1433G_HUMAN	YWHAG	14-3-3 protein gamma	8191.58	7650.99	8024.14	8955.22
P62068;P62068-4	O75317;P62068;P62068-2;P62068-3;P62068-4	UBP46_HUMAN	USP46	Ubiquitin carboxyl-terminal hydrolase 46	29044.8	34234.2	27287.1	3401.32
P62081	P62081	RS7_HUMAN	RPS7	Small ribosomal subunit protein eS7	35018.6	34976.6	40589	44493.3
P62136	P36873;P62136;P62140;P36873-2;P62136-2;P62136-3	PP1A_HUMAN	PPP1CA	Serine/threonine-protein phosphatase PP1-alpha catalytic subunit	5329.39	6224.4	5387.67	7060.08
P62140	P62140	PP1B_HUMAN	PPP1CB	Serine/threonine-protein phosphatase PP1-beta catalytic subunit	4388.4	4351.31	4605.95	5295.28
P62191	P62191	PRS4_HUMAN	PSMC1	26S proteasome regulatory subunit 4	14690.4	8730.28	14188.5	10484.9
P62195;P62195-2	P62195;P62195-2	PRS8_HUMAN	PSMC5	26S proteasome regulatory subunit 8	16088.3	14638.8	12657.5	15528.3
P62241	P62241	RS8_HUMAN	RPS8	Small ribosomal subunit protein eS8	50123.6	54412.5	49792.2	46723
P62244	P62244	RS15A_HUMAN	RPS15A	Small ribosomal subunit protein uS8	116715	128736	100128	125549
P62249	P62249	RS16_HUMAN	RPS16	Small ribosomal subunit protein uS9	44952.1	36076.9	45433.5	33488.6
P62258	P62258;P62258-2	1433E_HUMAN	YWHAE	14-3-3 protein epsilon	4897.46	4427.83	4586.44	7467.42
P62263	P62263	RS14_HUMAN	RPS14	Small ribosomal subunit protein uS11	11016.8	10615.9	12181.4	11150.3
P62266	P62266	RS23_HUMAN	RPS23	Small ribosomal subunit protein uS12	15108.3	14846.4	13305.6	12805.8
P62269	P62269	RS18_HUMAN	RPS18	Small ribosomal subunit protein uS13	39616.5	30924.9	37532.2	34322.8
P62273;P62273-2	P62273;P62273-2	RS29_HUMAN	RPS29	Small ribosomal subunit protein uS14	2085.96	1589.58	1900.63	1205.31
P62277	P62277	RS13_HUMAN	RPS13	Small ribosomal subunit protein uS15	41874.3	49874.6	43528.7	52736.6
P62280	P62280	RS11_HUMAN	RPS11	Small ribosomal subunit protein uS17	76411.5	82298.6	74150.4	65195.6
P62304	P62304	RUXE_HUMAN	SNRPE	Small nuclear ribonucleoprotein E	4580.14	6624.84	5794.66	6602.8
P62306	P62306	RUXF_HUMAN	SNRPF	Small nuclear ribonucleoprotein F	5578.88	5008.86	4439.35	4777.49
P62314	P62314	SMD1_HUMAN	SNRPD1	Small nuclear ribonucleoprotein Sm D1	834.9	782.42	901.63	1108.08
P62316;P62316-2	P62316;P62316-2	SMD2_HUMAN	SNRPD2	Small nuclear ribonucleoprotein Sm D2	3995.3	7138.32	4242.06	4159.32
P62318;P62318-2	P62318;P62318-2	SMD3_HUMAN	SNRPD3	Small nuclear ribonucleoprotein Sm D3	24486.3	29073.7	21519.2	24356
P62330	P62330	ARF6_HUMAN	ARF6	ADP-ribosylation factor 6	13671.1	14820.7	13155.3	13018.2
P62333	P62333	PRS10_HUMAN	PSMC6	26S proteasome regulatory subunit 10B	4546.83	3515.22	5493.3	4945.26
P62424	P62424	RL7A_HUMAN	RPL7A	Large ribosomal subunit protein eL8	8642.17	12090.8	11261.6	7715.69
P62487	P62487	RPB7_HUMAN	POLR2G	DNA-directed RNA polymerase II subunit RPB7	2066.23	1505.05	1793.79	1615.65
P62495;P62495-2	P62495;P62495-2	ERF1_HUMAN	ETF1	Eukaryotic peptide chain release factor subunit 1	17878.7	16523.1	15703	18650.4
P62633;P62633-2;P62633-4;P62633-5;P62633-6;P62633-8	P62633;P62633-2;P62633-4;P62633-5;P62633-6;P62633-8	CNBP_HUMAN	CNBP	CCHC-type zinc finger nucleic acid binding protein	143.274		369.535	776.085
P62701	P62701;P22090;Q8TD47	RS4X_HUMAN	RPS4X	Small ribosomal subunit protein eS4, X isoform	34829.4	35697.4	34533.2	35951.3
P62736;P63267	P62736;P63267;P68032;P68133	ACTA_HUMAN;ACTH_HUMAN	ACTA2;ACTG2	Actin, aortic smooth muscle	23195.9	20554.3	18182.6	20195.6
P62750	P62750	RL23A_HUMAN	RPL23A	Large ribosomal subunit protein uL23	56836.6	50765.1	59522.2	63128.8
P62753	P62753	RS6_HUMAN	RPS6	Small ribosomal subunit protein eS6	26254.5	33417	29187.5	21067.3
P62805	P62805	H4_HUMAN	H4C1	Histone H4	5127.71	4425.96	3663.78	5392.87
P62820	P62820;Q9H0U4;Q92928;P62820-2	RAB1A_HUMAN	RAB1A	Ras-related protein Rab-1A	99602.2	118237	100139	102923
P62826	P62826	RAN_HUMAN	RAN	GTP-binding nuclear protein Ran	125837	123767	124903	116823
P62829	P62829	RL23_HUMAN	RPL23	Large ribosomal subunit protein uL14	15060.4	18171.4	16039.6	16900.6
P62834	P61224;P62834;A6NIZ1;P61224-2;P61224-3	RAP1A_HUMAN	RAP1A	Ras-related protein Rap-1A	11975.2	15676.1	10401	13651.6
P62841	P62841	RS15_HUMAN	RPS15	Small ribosomal subunit protein uS19	3283.55	3180.04	3072.24	3455.55
P62847;P62847-2;P62847-3;P62847-4	P62847;P62847-2;P62847-3;P62847-4	RS24_HUMAN	RPS24	Small ribosomal subunit protein eS24	7513.24	5974.3	5525.14	5581.09
P62851	P62851	RS25_HUMAN	RPS25	Small ribosomal subunit protein eS25	5170.09	2831.86	4760.27	5130.48
P62854	P62854;Q5JNZ5	RS26_HUMAN	RPS26	Small ribosomal subunit protein eS26	8220.51	9605.07	6666.16	9222.48
P62857	P62857	RS28_HUMAN	RPS28	Small ribosomal subunit protein eS28	44392.4	23599.6	36922.9	33966.3
P62861	P62861	RS30_HUMAN	FAU	Ubiquitin-like FUBI-ribosomal protein eS30 fusion protein	14542.9	14289.7	12410	13569.7
P62873	P62873;P62873-2	GBB1_HUMAN	GNB1	Guanine nucleotide-binding protein G(I)/G(S)/G(T) subunit beta-1	17601.6	19148	18144.9	19196.2
P62879	P62873;P62879;P62879-2	GBB2_HUMAN	GNB2	Guanine nucleotide-binding protein G(I)/G(S)/G(T) subunit beta-2	33324.3	34175	35006	31226.2
P62888	P62888	RL30_HUMAN	RPL30	Large ribosomal subunit protein eL30	70242.3	61031.3	70590.6	53855.3
P62899;P62899-2;P62899-3	P62899;P62899-2;P62899-3	RL31_HUMAN	RPL31	Large ribosomal subunit protein eL31	13431.8	14869.3	11826.9	12021.5
P62906	P62906	RL10A_HUMAN	RPL10A	Large ribosomal subunit protein uL1	28004.6	22830.8	25333.9	25853
P62910	P62910	RL32_HUMAN	RPL32	Large ribosomal subunit protein eL32	1468.56	1331.17	1085.29	1259.48
P62913;P62913-2	P62913;P62913-2	RL11_HUMAN	RPL11	Large ribosomal subunit protein uL5	88969.4	78839.3	78757	92277.8
P62917	P62917	RL8_HUMAN	RPL8	Large ribosomal subunit protein uL2	4715.53	5164.27	4419.26	3661.1
P62937	P62937	PPIA_HUMAN	PPIA	Peptidyl-prolyl cis-trans isomerase A	92118.6	114919	101376	124617
P62979	P62979	RS27A_HUMAN	RPS27A	Ubiquitin-ribosomal protein eS31 fusion protein	431200	430231	447634	121616
P62995;P62995-3	P62995;P62995-3	TRA2B_HUMAN	TRA2B	Transformer-2 protein homolog beta	394.8	730.903	365.097	367.208
P63000;P63000-2	P15153;P60763;P63000;P63000-2	RAC1_HUMAN	RAC1	Ras-related C3 botulinum toxin substrate 1	10968.6	11361.3	9555.35	9108.42
P63010-3	P63010;P63010-2;P63010-3	AP2B1_HUMAN	AP2B1	Isoform 3 of AP-2 complex subunit beta	9097.61	8689.76	8877.52	8449.81
P63092;P63092-2;P63092-3;P63092-4;Q5JWF2;Q5JWF2-2	P63092;Q5JWF2;P63092-2;P63092-3;P63092-4;Q5JWF2-2	GNAS1_HUMAN;GNAS2_HUMAN	GNAS	Guanine nucleotide-binding protein G(s) subunit alpha isoforms short	53838.2	48037.4	50169.6	47856.9
P63104	P63104;P63104-2	1433Z_HUMAN	YWHAZ	14-3-3 protein zeta/delta	7450.85	4793.77	6728.77	8911.63
P63151;P63151-2	P63151;P63151-2	2ABA_HUMAN	PPP2R2A	Serine/threonine-protein phosphatase 2A 55 kDa regulatory subunit B alpha isoform	9151.29	9061.58	8126.74	8779.91
P63167	P63167;Q96FJ2	DYL1_HUMAN	DYNLL1	Dynein light chain 1, cytoplasmic	9092.63	8020.92	8698.04	7743.39
P63172	P63172	DYLT1_HUMAN	DYNLT1	Dynein light chain Tctex-type 1	2978.14	2288.05	2266.06	3070.48
P63220	P63220	RS21_HUMAN	RPS21	Small ribosomal subunit protein eS21	28811.6	28250.9	32082.2	28956.1
P63241;P63241-2;Q6IS14	P63241;Q9GZV4;Q6IS14;P63241-2	IF5A1_HUMAN;IF5AL_HUMAN	EIF5A;EIF5AL1	Eukaryotic translation initiation factor 5A-1	608.991	370.597	652.698	1633.8
P63244	P63244	RACK1_HUMAN	RACK1	Small ribosomal subunit protein RACK1	69849.5	69708.6	65382.3	67252.3
P63279	P63279	UBC9_HUMAN	UBE2I	SUMO-conjugating enzyme UBC9		580.696		1084
P67775	P62714;P67775;P67775-2	PP2AA_HUMAN	PPP2CA	Serine/threonine-protein phosphatase 2A catalytic subunit alpha isoform	5679.62	6951.77	5390.4	6430.12
P67809	P16989;P67809;Q9Y2T7;P16989-2;P16989-3	YBOX1_HUMAN	YBX1	Y-box-binding protein 1	3310.7	4529.12	3537.6	4463.47
P67812;P67812-2;P67812-3;P67812-4	P67812;P67812-2;P67812-3;P67812-4	SC11A_HUMAN	SEC11A	Signal peptidase complex catalytic subunit SEC11A	3365.86	2627.97	3424.4	2635.69
P68104;Q5VTE0	P68104;Q5VTE0	EF1A1_HUMAN;EF1A3_HUMAN	EEF1A1;EEF1A1P5	Elongation factor 1-alpha 1	33471	24616.4	36071.4	24363.1
P68363;P68363-2;P68366;P68366-2	P68363;P68366;P68363-2;P68366-2	TBA1B_HUMAN;TBA4A_HUMAN	TUBA1B;TUBA4A	Tubulin alpha-1B chain	85880.9	94736	99745.4	76864.1
P68371	P68371;Q13885;Q9BVA1	TBB4B_HUMAN	TUBB4B	Tubulin beta-4B chain	109384	102689	112847	111158
P68400	P68400;P68400-2	CSK21_HUMAN	CSNK2A1	Casein kinase II subunit alpha	3724.16	3457.24	3927.74	4043.95
P68402	P68402	PA1B2_HUMAN	PAFAH1B2	Platelet-activating factor acetylhydrolase IB subunit alpha2	3565.52	4269.49	4232.81	5548.65
P69849;Q15155;Q5JPE7;Q5JPE7-2	P69849;Q15155;Q5JPE7;Q5JPE7-2;Q5JPE7-3	NOMO1_HUMAN;NOMO2_HUMAN;NOMO3_HUMAN	NOMO1;NOMO2;NOMO3	BOS complex subunit NOMO3	2865.2	2878.62	2809	3057.75
P78330	P78330	SERB_HUMAN	PSPH	Phosphoserine phosphatase	1675.77	1618.24	2017.1	1070.38
P78344;P78344-2	P78344;P78344-2	IF4G2_HUMAN	EIF4G2	Eukaryotic translation initiation factor 4 gamma 2	665.029	318.553	981.749	311.942
P78346;P78346-2	P78346;P78346-2	RPP30_HUMAN	RPP30	Ribonuclease P protein subunit p30	4834.77	5519.38	5141.46	4895.27
P78347;P78347-2;P78347-3;P78347-4	P78347;P78347-2;P78347-3;P78347-4;P78347-5	GTF2I_HUMAN	GTF2I	General transcription factor II-I	7999.96	7683.86	8838.44	8940.69
P78371	P78371;P78371-2	TCPB_HUMAN	CCT2	T-complex protein 1 subunit beta	13501.2	10643.5	14192.2	12369.6
P78406	P78406	RAE1L_HUMAN	RAE1	mRNA export factor RAE1	2264.59	2740.16	2243.26	2377.67
P78417	P78417;P78417-3	GSTO1_HUMAN	GSTO1	Glutathione S-transferase omega-1	9704.53	10197.4	11375	11867.2
P78527	P78527;P78527-2	PRKDC_HUMAN	PRKDC	DNA-dependent protein kinase catalytic subunit	22729.3	25824.9	24272.7	24299.6
P82912;P82912-2	P82912;P82912-2;P82912-3	RT11_HUMAN	MRPS11	Small ribosomal subunit protein uS11m	2652.81	2519.52	1978.04	1937.8
P82914	P82914	RT15_HUMAN	MRPS15	Small ribosomal subunit protein uS15m	2293.06	2035.33	2396.38	2769.72
P82933	P82933	RT09_HUMAN	MRPS9	Small ribosomal subunit protein uS9m	778.05		255.784	566.785
P83731	P83731	RL24_HUMAN	RPL24	Large ribosomal subunit protein eL24	20917.6	23482.2	21850.7	19545.5
P84085	P84085	ARF5_HUMAN	ARF5	ADP-ribosylation factor 5	57368.7	77194.6	55007.7	67883.4
P84095	P84095	RHOG_HUMAN	RHOG	Rho-related GTP-binding protein RhoG	633.506	1626.17	1441.87	1105.36
P84098	P84098	RL19_HUMAN	RPL19	Large ribosomal subunit protein eL19	1596.65	1598.2	1954.42	1825.54
P84103;P84103-2	P84103;Q16629;P84103-2;Q16629-2;Q16629-3;Q16629-4	SRSF3_HUMAN	SRSF3	Serine/arginine-rich splicing factor 3	17116.6	17207.8	17785.9	22786.7
P85037;P85037-2	P85037;P85037-2	FOXK1_HUMAN	FOXK1	Forkhead box protein K1	264.746	601.387		281.082
P86790;P86791	P86791;P86790	CCZ1B_HUMAN;CCZ1_HUMAN	CCZ1;CCZ1B	Vacuolar fusion protein CCZ1 homolog B	6952.46	4535.62	6256.34	4949.58
P98194;P98194-2;P98194-3;P98194-4;P98194-5;P98194-6;P98194-7;P98194-8;P98194-9	P98194;P98194-2;P98194-3;P98194-4;P98194-5;P98194-6;P98194-7;P98194-8;P98194-9	AT2C1_HUMAN	ATP2C1	Calcium-transporting ATPase type 2C member 1	596.649	774.386	977.068	856.364
P99999	P99999	CYC_HUMAN	CYCS	Cytochrome c	4226.82	3402.12	3978.34	3706.31
Q00325;Q00325-2	Q00325;Q00325-2	S25A3_HUMAN	SLC25A3	Solute carrier family 25 member 3	32808.5	29863	32479.5	29319.7
Q00341	Q00341;Q00341-2	VIGLN_HUMAN	HDLBP	Vigilin	5487.41	5711.33	6455.97	5925.24
Q00535	Q00535;Q00535-2	CDK5_HUMAN	CDK5	Cyclin-dependent kinase 5	3163.72	2480.68	2884.84	2412.02
Q00577	Q00577	PURA_HUMAN	PURA	Transcriptional activator protein Pur-alpha	4088.04	5210.96	4169.17	4601.5
Q00610;Q00610-2	P53675;Q00610;P53675-2;Q00610-2	CLH1_HUMAN	CLTC	Clathrin heavy chain 1	35116.2	35460.1	36568.3	36049.4
Q00796	Q00796	DHSO_HUMAN	SORD	Sorbitol dehydrogenase	8934.22	11202	7955.6	10798.4
Q00839;Q00839-2	Q00839;Q00839-2	HNRPU_HUMAN	HNRNPU	Heterogeneous nuclear ribonucleoprotein U	48798.2	54858	48220.8	46016.8
Q01082	Q01082	SPTB2_HUMAN	SPTBN1	Spectrin beta chain, non-erythrocytic 1	2292.29	1187.46	2053.76	1815.72
Q01130;Q01130-2	Q01130;Q01130-2	SRSF2_HUMAN	SRSF2	Serine/arginine-rich splicing factor 2	690.807	752.868	646.821
Q01415;Q01415-2	Q01415;Q01415-2	GALK2_HUMAN	GALK2	N-acetylgalactosamine kinase	271.731		446.497	299.695
Q01518;Q01518-2	Q01518;Q01518-2	CAP1_HUMAN	CAP1	Adenylyl cyclase-associated protein 1	7251.45	7315.83	7779.54	6782.43
Q01581	Q01581	HMCS1_HUMAN	HMGCS1	Hydroxymethylglutaryl-CoA synthase, cytoplasmic	2757.87	3453.54	2143.18	3802.66
Q01650	Q01650	LAT1_HUMAN	SLC7A5	Large neutral amino acids transporter small subunit 1	15111.7	14527	15690.9	16071.9
Q01780;Q01780-2	Q01780;Q01780-2	EXOSX_HUMAN	EXOSC10	Exosome component 10	1469.75	1571.79	2040.7	1767.24
Q01804	Q01804;Q01804-3;Q01804-5	OTUD4_HUMAN	OTUD4	OTU domain-containing protein 4	8162.06	8033.75	6859.1	394.162
Q01813	Q01813;Q01813-2	PFKAP_HUMAN	PFKP	ATP-dependent 6-phosphofructokinase, platelet type	20316.4	16870.5	20534.1	19968.1
Q01968;Q01968-2	Q01968;Q01968-2	OCRL_HUMAN	OCRL	Inositol polyphosphate 5-phosphatase OCRL	2179.45	2152.4	2039.06	1550.85
Q01970;Q01970-2	Q01970;Q01970-2	PLCB3_HUMAN	PLCB3	1-phosphatidylinositol 4,5-bisphosphate phosphodiesterase beta-3	2606.96	2528.51	2459	3162.08
Q02127	Q02127	PYRD_HUMAN	DHODH	Dihydroorotate dehydrogenase (quinone), mitochondrial	719.15	526.138	482.113	425.114
Q02218;Q02218-2	Q02218;Q9ULD0;Q02218-2;Q02218-3;Q9ULD0-2;Q9ULD0-3	ODO1_HUMAN	OGDH	2-oxoglutarate dehydrogenase complex component E1	2449.9	2870.79	3520.32	2957.73
Q02241;Q02241-2;Q02241-3	Q02241;Q02241-2;Q02241-3	KIF23_HUMAN	KIF23	Kinesin-like protein KIF23	727.423	567.943	899.623	1012.33
Q02252;Q02252-2	Q02252;Q02252-2	MMSA_HUMAN	ALDH6A1	Methylmalonate-semialdehyde dehydrogenase [acylating], mitochondrial	7010.32	5970.66	6073.44	5794.08
Q02338	Q02338	BDH_HUMAN	BDH1	D-beta-hydroxybutyrate dehydrogenase, mitochondrial	6251.84	5389.64	6068.65	5593.78
Q02543	Q02543	RL18A_HUMAN	RPL18A	Large ribosomal subunit protein eL20	2451.6	5252.86	4585.38	2950.29
Q02790	Q02790	FKBP4_HUMAN	FKBP4	Peptidyl-prolyl cis-trans isomerase FKBP4	4058.88	2799.5	4593.34	5729.68
Q02809;Q02809-2	Q02809;Q02809-2	PLOD1_HUMAN	PLOD1	Procollagen-lysine,2-oxoglutarate 5-dioxygenase 1	1723.41	1318.23	1069.2	1312.69
Q02878	Q02878	RL6_HUMAN	RPL6	Large ribosomal subunit protein eL6	10374	23997.8	28690.8	22866.4
Q02880;Q02880-2	Q02880;Q02880-2	TOP2B_HUMAN	TOP2B	DNA topoisomerase 2-beta	1631.52	894.771	1406.98	1478.91
Q02978	Q02978;Q02978-2	M2OM_HUMAN	SLC25A11	Mitochondrial 2-oxoglutarate/malate carrier protein	2819.97	3572.69	2689.67	2416.08
Q03426	Q03426	KIME_HUMAN	MVK	Mevalonate kinase	1603.97	1776.83	1676.21	1607.97
Q04206;Q04206-2;Q04206-3;Q04206-4	Q04206;Q04206-2;Q04206-3;Q04206-4	TF65_HUMAN	RELA	Transcription factor p65	4560.52	4343.79	4009.22	5035.31
Q04323;Q04323-2	Q04323;Q04323-2	UBXN1_HUMAN	UBXN1	UBX domain-containing protein 1	2632.71	2100	1872.94	2845.18
Q04446	Q04446	GLGB_HUMAN	GBE1	1,4-alpha-glucan-branching enzyme	1842.58	1673.83	1791.49	1384.38
Q04637;Q04637-3;Q04637-4;Q04637-5;Q04637-8;Q04637-9	Q04637;Q04637-9;Q04637-3;Q04637-4;Q04637-5;Q04637-6;Q04637-7;Q04637-8	IF4G1_HUMAN	EIF4G1	Eukaryotic translation initiation factor 4 gamma 1	8937.07	7316.41	9074.6	7117.32
Q04726;Q04726-2;Q04726-3;Q04726-4;Q04726-5;Q04726-6;Q04726-7	Q04724;Q04725;Q04726;Q04727;Q04726-4;Q04726-2;Q04726-3;Q04726-5;Q04726-6;Q04726-7;Q04727-2;Q04727-3;Q04727-4;Q04725-2	TLE3_HUMAN	TLE3	Transducin-like enhancer protein 3	5318.35	4788.47	4715.08	4964.45
Q04837	Q04837	SSBP_HUMAN	SSBP1	Single-stranded DNA-binding protein, mitochondrial	8307.36	5706.3	8879.29	10159.8
Q04864;Q04864-2	Q04864;Q04864-2	REL_HUMAN	REL	Proto-oncogene c-Rel	2746.71	2386.22	2780.22	2264.14
Q04917	Q04917	1433F_HUMAN	YWHAH	14-3-3 protein eta	6047	5902.94	5893.93	6007.83
Q05048	Q05048	CSTF1_HUMAN	CSTF1	Cleavage stimulation factor subunit 1	735.66	1204.02	671.305	968.544
Q05086;Q05086-2;Q05086-3	Q05086;Q05086-2;Q05086-3	UBE3A_HUMAN	UBE3A	Ubiquitin-protein ligase E3A	4579.74	3536.34	2994.89	2758.27
Q05397;Q05397-2;Q05397-5;Q05397-7	Q05397;Q05397-2;Q05397-3;Q05397-5;Q05397-7	FAK1_HUMAN	PTK2	Focal adhesion kinase 1	1652.89	1396.19	1790.44	1498.12
Q05639	Q05639	EF1A2_HUMAN	EEF1A2	Elongation factor 1-alpha 2	186378	188932	210946	211373
Q05655;Q05655-2	Q04759;Q05655;Q04759-2;Q04759-3;Q05655-2	KPCD_HUMAN	PRKCD	Protein kinase C delta type	3024.91	2715.71	2701.35	2477.27
Q06124-1	Q06124;Q06124-1	PTN11_HUMAN	PTPN11	Isoform 2 of Tyrosine-protein phosphatase non-receptor type 11	3926.35	3152.97	3367.03	3255.67
Q06136	Q06136;Q06136-2	KDSR_HUMAN	KDSR	3-ketodihydrosphingosine reductase	1320.33	1330	1441.39	1677.89
Q06203	Q06203	PUR1_HUMAN	PPAT	Amidophosphoribosyltransferase	14515.9	15333.6	14903.7	15447.2
Q06210;Q06210-2	Q06210;Q06210-2	GFPT1_HUMAN	GFPT1	Glutamine--fructose-6-phosphate aminotransferase [isomerizing] 1	8335.68	7519.68	8198.17	7905.49
Q06265;Q06265-2	Q06265;Q06265-2	EXOS9_HUMAN	EXOSC9	Exosome complex component RRP45	4989.57	4791.05	5013.74	4781.72
Q06323	Q06323	PSME1_HUMAN	PSME1	Proteasome activator complex subunit 1				530.671
Q06330;Q06330-2;Q06330-3;Q06330-4;Q06330-5;Q06330-6;Q06330-7	Q06330;Q06330-2;Q06330-3;Q06330-4;Q06330-5;Q06330-6;Q06330-7	SUH_HUMAN	RBPJ	Recombining binding protein suppressor of hairless	1370.65	1438.64	1455.9	2075.79
Q06481;Q06481-3;Q06481-6	Q06481;Q06481-5;Q06481-2;Q06481-3;Q06481-4;Q06481-6	APLP2_HUMAN	APLP2	Amyloid beta precursor like protein 2	1271.81	1788.29	1589.01	1940.17
Q06830	Q06830	PRDX1_HUMAN	PRDX1	Peroxiredoxin-1	114124	134500	121727	156478
Q07020;Q07020-2	Q07020;Q07020-2	RL18_HUMAN	RPL18	Large ribosomal subunit protein eL18	4657.01	9748.13	9874.4	5888.59
Q07021	Q07021	C1QBP_HUMAN	C1QBP	Complement component 1 Q subcomponent-binding protein, mitochondrial	771.766	1198.51	727.082	1706.07
Q07065	Q07065	CKAP4_HUMAN	CKAP4	Cytoskeleton-associated protein 4	1272.84	1072.82	931.99	1305.57
Q07666;Q07666-2;Q07666-3	Q07666;Q07666-2;Q07666-3	KHDR1_HUMAN	KHDRBS1	KH domain-containing, RNA-binding, signal transduction-associated protein 1	1604.58	1961.98	1929.82	2456.41
Q07812;Q07812-2;Q07812-5;Q07812-7;Q07812-8	Q07812;Q07812-8;Q07812-2;Q07812-5;Q07812-7	BAX_HUMAN	BAX	Apoptosis regulator BAX	624.879		525.964	799.393
Q07864	Q07864	DPOE1_HUMAN	POLE	DNA polymerase epsilon catalytic subunit A	1034.18	782.688	1033.23	1081.96
Q07955	Q07955;Q07955-2;Q07955-3	SRSF1_HUMAN	SRSF1	Serine/arginine-rich splicing factor 1	18912.4	19213.9	16234.6	18312.8
Q07960	Q07960	RHG01_HUMAN	ARHGAP1	Rho GTPase-activating protein 1	1710.61	957.35	1108.48	1311.59
Q08209;Q08209-2;Q08209-3	P16298;P48454;Q08209;Q08209-2;P16298-2;P16298-3;P16298-4;P48454-2;P48454-3;Q08209-3;Q08209-5	PP2BA_HUMAN	PPP3CA	Protein phosphatase 3 catalytic subunit alpha	2073.33	1942.36	1662.19	1608.35
Q08211	Q08211	DHX9_HUMAN	DHX9	ATP-dependent RNA helicase A	15803.1	15847	15425.5	15178.3
Q08257;Q08257-3	Q08257;Q08257-3	QOR_HUMAN	CRYZ	Quinone oxidoreductase	6924.32	7141.91	7810.62	7064.89
Q08380	Q08380	LG3BP_HUMAN	LGALS3BP	Galectin-3-binding protein	361.378	725.386	604.475	498.194
Q08752	Q08752	PPID_HUMAN	PPID	Peptidyl-prolyl cis-trans isomerase D	715.244	738.458	833.305	1576.03
Q08945	Q08945	SSRP1_HUMAN	SSRP1	FACT complex subunit SSRP1	1686.02	1374.61	1329.92	912.12
Q08J23;Q08J23-2	Q08J23;Q08J23-2;Q08J23-3	NSUN2_HUMAN	NSUN2	RNA cytosine C(5)-methyltransferase NSUN2	6072.86	5872.13	6058.69	5867.6
Q09028;Q09028-2;Q09028-3;Q09028-4	Q09028;Q09028-2;Q09028-3;Q09028-4	RBBP4_HUMAN	RBBP4	Histone-binding protein RBBP4	5546.79	5337.55	5007.65	7364.74
Q09161	Q09161	NCBP1_HUMAN	NCBP1	Nuclear cap-binding protein subunit 1	2573.2	2015.45	2645.04	1589.42
Q09666	Q09666	AHNK_HUMAN	AHNAK	Neuroblast differentiation-associated protein AHNAK	5995.16	4980.33	5489.3	5339.86
Q0VDF9	Q0VDF9	HSP7E_HUMAN	HSPA14	Heat shock 70 kDa protein 14	3061.55	2824.22	2216.7	2483.25
Q10567-3;Q10567-4	P63010;P63010-2;Q10567;Q10567-3;P63010-3;Q10567-2;Q10567-4	AP1B1_HUMAN	AP1B1	Isoform C of AP-1 complex subunit beta-1	11013	10886.2	10979.8	11109.4
Q10570	Q10570	CPSF1_HUMAN	CPSF1	Cleavage and polyadenylation specificity factor subunit 1	1955.54	2415.73	1797.14	1856.19
Q10713	Q10713;Q10713-2	MPPA_HUMAN	PMPCA	Mitochondrial-processing peptidase subunit alpha	3349.35	3865.79	3084.94	4029.38
Q12765;Q12765-2;Q12765-3	Q12765;Q12765-2;Q12765-3	SCRN1_HUMAN	SCRN1	Secernin-1	280.262	496.786	352.922	375.15
Q12768	Q12768	WASC5_HUMAN	WASHC5	WASH complex subunit 5	2533.26	1993.11	3023.66	2442.46
Q12769	Q12769;Q12769-3	NU160_HUMAN	NUP160	Nuclear pore complex protein Nup160	732.803	898.715	1393.53	957.378
Q12788	Q12788	TBL3_HUMAN	TBL3	Transducin beta-like protein 3		1935.7	939.847	1508.61
Q12789;Q12789-3	Q12789;Q12789-3	TF3C1_HUMAN	GTF3C1	General transcription factor 3C polypeptide 1	1539.08	1575.4	1530.47	1138.28
Q12792;Q12792-4	Q12792;Q6IBS0;Q12792-3;Q12792-4	TWF1_HUMAN	TWF1	Twinfilin-1	4521.45	5406.47	4802.52	4699.34
Q12904;Q12904-2	Q12904;Q12904-2	AIMP1_HUMAN	AIMP1	Aminoacyl tRNA synthase complex-interacting multifunctional protein 1	2420.91	2743.06	3469	3460.47
Q12905	Q12905	ILF2_HUMAN	ILF2	Interleukin enhancer-binding factor 2	19124	17840.9	18269.7	19214.6
Q12906;Q12906-2;Q12906-3;Q12906-4;Q12906-5;Q12906-6;Q12906-7	Q12906;Q12906-2;Q12906-3;Q12906-4;Q12906-5;Q12906-6;Q12906-7	ILF3_HUMAN	ILF3	Interleukin enhancer-binding factor 3	10484.6	10467.7	10848.8	10376.9
Q12907	Q12907	LMAN2_HUMAN	LMAN2	Vesicular integral-membrane protein VIP36	4957.84	6544.5	4637.04	5285.33
Q12931;Q12931-2	Q12931;Q12931-2	TRAP1_HUMAN	TRAP1	Heat shock protein 75 kDa, mitochondrial	17615.4	18118.5	16953.8	17260.1
Q12933;Q12933-2;Q12933-3;Q12933-4	Q12933;Q12933-2;Q12933-3;Q12933-4	TRAF2_HUMAN	TRAF2	TNF receptor-associated factor 2	1304.2	1064.1	1253.66	1027.95
Q12955;Q12955-4;Q12955-5;Q12955-6;Q12955-7	Q12955;Q12955-4;Q12955-5;Q12955-6;Q12955-7	ANK3_HUMAN	ANK3	Ankyrin-3	1478.79	1307.39	1088.03	1156.98
Q12979;Q12979-2;Q12979-4	Q12979;Q12979-2;Q12979-4	ABR_HUMAN	ABR	Active breakpoint cluster region-related protein	2237.94	2061.85	2328.35	2498.78
Q13011	Q13011	ECH1_HUMAN	ECH1	Delta(3,5)-Delta(2,4)-dienoyl-CoA isomerase, mitochondrial	6338.39	8842.08	6981.01	7992.6
Q13033;Q13033-2	Q13033;Q9NRL3;Q13033-2;Q9NRL3-3	STRN3_HUMAN	STRN3	Striatin-3	1852.3	1934.64	1769.89	1470.65
Q13042;Q13042-2;Q13042-3;Q13042-4	Q13042;Q13042-2;Q13042-3;Q13042-4	CDC16_HUMAN	CDC16	Cell division cycle protein 16 homolog		674.53		482.284
Q13045;Q13045-2	Q13045;Q13045-2;Q13045-3	FLII_HUMAN	FLII	Protein flightless-1 homolog	3278.33	3636.91	3376.24	2449.85
Q13085;Q13085-2;Q13085-3;Q13085-4	Q13085;Q13085-2;Q13085-3;Q13085-4	ACACA_HUMAN	ACACA	Acetyl-CoA carboxylase 1	3173.72	3332.48	3527.61	3301.18
Q13098;Q13098-5;Q13098-6;Q13098-7	Q13098;Q13098-5;Q13098-6;Q13098-7	CSN1_HUMAN	GPS1	COP9 signalosome complex subunit 1	727.602	761.685	1143.1	1352.95
Q13107;Q13107-2	Q13107;Q13107-2;Q13107-3	UBP4_HUMAN	USP4	Ubiquitin carboxyl-terminal hydrolase 4	31995.9	35194.1	27582.2	3049.38
Q13131;Q13131-2	P54646;Q13131;Q13131-2	AAPK1_HUMAN	PRKAA1	5'-AMP-activated protein kinase catalytic subunit alpha-1	2686.35	2819.24	2686.48	3587.04
Q13144	Q13144	EI2BE_HUMAN	EIF2B5	Translation initiation factor eIF-2B subunit epsilon	4645.71	4037.27	4078.45	3713.84
Q13148	Q13148	TADBP_HUMAN	TARDBP	TAR DNA-binding protein 43	3842.2	2378.17	3356.93	2618.72
Q13151	Q13151	ROA0_HUMAN	HNRNPA0	Heterogeneous nuclear ribonucleoprotein A0	4126.1	3230.35	3789.99	3570.22
Q13155;Q13155-2	Q13155;Q13155-2	AIMP2_HUMAN	AIMP2	Aminoacyl tRNA synthase complex-interacting multifunctional protein 2	15691.2	15739.4	18073.1	15492.4
Q13162	Q13162	PRDX4_HUMAN	PRDX4	Peroxiredoxin-4	11600.3	11070.3	12083.2	12808.1
Q13177	Q13177	PAK2_HUMAN	PAK2	Serine/threonine-protein kinase PAK 2	8494.23	9805.4	10199.3	13076.8
Q13185	Q13185	CBX3_HUMAN	CBX3	Chromobox protein homolog 3	403.565			127.349
Q13188;Q13188-2	Q13188;Q13188-2	STK3_HUMAN	STK3	Serine/threonine-protein kinase 3	577.603	233.77	305.756	199.059
Q13200	Q13200;Q13200-2;Q13200-3	PSMD2_HUMAN	PSMD2	26S proteasome non-ATPase regulatory subunit 2	9826.62	10208.1	9804.28	11027.9
Q13228;Q13228-4	Q13228;Q13228-2;Q13228-4	SBP1_HUMAN	SELENBP1	Methanethiol oxidase	9685.61	11400.2	8373.65	12239.2
Q13243;Q13243-3	Q13243;Q13243-3	SRSF5_HUMAN	SRSF5	Serine/arginine-rich splicing factor 5	14633	13521.5	11642.7	13632
Q13257	Q13257	MD2L1_HUMAN	MAD2L1	Mitotic spindle assembly checkpoint protein MAD2A	14751.9	12669.7	12672.2	13388.5
Q13263	Q13263;Q13263-2	TIF1B_HUMAN	TRIM28	Transcription intermediary factor 1-beta	14641.5	8892.77	15121	12938.3
Q13283	Q13283;Q9UN86;Q13283-2;Q9UN86-2	G3BP1_HUMAN	G3BP1	Ras GTPase-activating protein-binding protein 1	14642.7	6121.63	11323	6245.91
Q13308;Q13308-2;Q13308-4;Q13308-6	Q13308;Q13308-2;Q13308-3;Q13308-4;Q13308-5;Q13308-6	PTK7_HUMAN	PTK7	Inactive tyrosine-protein kinase 7	5373.75	4959.62	4825.11	6701.48
Q13310;Q13310-2;Q13310-3	Q13310;Q13310-2;Q13310-3	PABP4_HUMAN	PABPC4	Polyadenylate-binding protein 4	5911.23	4460.87	5297.58	4466.97
Q13330-3	Q13330;Q9BTC8;Q13330-2;Q13330-3;Q9BTC8-2	MTA1_HUMAN	MTA1	Isoform 3 of Metastasis-associated protein MTA1	788.588	726.759	693.85	775.449
Q13347	Q13347	EIF3I_HUMAN	EIF3I	Eukaryotic translation initiation factor 3 subunit I	17211.6	17108.1	16275.1	16128.9
Q13363;Q13363-2	Q13363;Q13363-2	CTBP1_HUMAN	CTBP1	C-terminal-binding protein 1	2340.53	2263.38	2303.59	2101.74
Q13371;Q13371-2	Q13371;Q13371-2	PHLP_HUMAN	PDCL	Phosducin-like protein	475.819	734.01	1090.1	614.351
Q13404;Q13404-1;Q13404-2;Q13404-7	Q13404;Q13404-1;Q13404-2;Q13404-6;Q13404-7	UB2V1_HUMAN	UBE2V1	Ubiquitin-conjugating enzyme E2 variant 1	6849.65	8611.51	7933.29	8064.02
Q13409;Q13409-2;Q13409-3;Q13409-5;Q13409-6;Q13409-7	Q13409;Q13409-3;Q13409-2;Q13409-5;Q13409-6;Q13409-7	DC1I2_HUMAN	DYNC1I2	Cytoplasmic dynein 1 intermediate chain 2	2364.39	2407.12	1907.1	2906.23
Q13418;Q13418-2;Q13418-3	Q13418;Q13418-2;Q13418-3	ILK_HUMAN	ILK	Integrin-linked protein kinase	866.702	720.953	765.685	754.302
Q13423	Q13423	NNTM_HUMAN	NNT	NAD(P) transhydrogenase, mitochondrial	2289.48	2821.51	2199.48	3112.48
Q13425	Q13425	SNTB2_HUMAN	SNTB2	Beta-2-syntrophin	877.909	375.228	1150.93	1290.84
Q13428;Q13428-2;Q13428-3;Q13428-4;Q13428-8	Q13428;Q13428-2;Q13428-3;Q13428-4;Q13428-6;Q13428-7;Q13428-8	TCOF_HUMAN	TCOF1	Treacle protein	10717.6	9802.5	8746.48	7715.79
Q13435	Q13435	SF3B2_HUMAN	SF3B2	Splicing factor 3B subunit 2	1110.1	956.034	1147.52	822.349
Q13439;Q13439-3;Q13439-4;Q13439-5	Q13439;Q13439-3;Q13439-4;Q13439-5	GOGA4_HUMAN	GOLGA4	Golgin subfamily A member 4	1048.93	605.809	1117.32	1272.21
Q13445	Q13445	TMED1_HUMAN	TMED1	Transmembrane emp24 domain-containing protein 1	1574.5	1525.62	1088.98	1622.12
Q13454;Q13454-2	Q13454;Q13454-2	TUSC3_HUMAN	TUSC3	Tumor suppressor candidate 3	1174.26	1531.37	1342.02	1198.98
Q13492;Q13492-2;Q13492-3;Q13492-4;Q13492-5	Q13492;Q13492-2;Q13492-3;Q13492-4;Q13492-5	PICAL_HUMAN	PICALM	Phosphatidylinositol-binding clathrin assembly protein	857.976	948.363	900.3	700.754
Q13509	Q13509;Q13509-2	TBB3_HUMAN	TUBB3	Tubulin beta-3 chain	5541.14	5189.1	6196.1	4792.13
Q13510;Q13510-2;Q13510-3	Q13510;Q13510-2;Q13510-3	ASAH1_HUMAN	ASAH1	Acid ceramidase			1262.96	1591
Q13546	Q13546;Q13546-2	RIPK1_HUMAN	RIPK1	Receptor-interacting serine/threonine-protein kinase 1	2489.4	2041.75	2169.39	2750.53
Q13547	Q13547	HDAC1_HUMAN	HDAC1	Histone deacetylase 1	3450.05	3393.04	2642.86	3353.74
Q13555;Q13555-10;Q13555-11;Q13555-2;Q13555-3;Q13555-4;Q13555-5;Q13555-6;Q13555-7;Q13555-8;Q13555-9	Q13555;Q13555-5;Q13555-10;Q13555-11;Q13555-2;Q13555-3;Q13555-4;Q13555-6;Q13555-7;Q13555-8;Q13555-9	KCC2G_HUMAN	CAMK2G	Calcium/calmodulin-dependent protein kinase type II subunit gamma	1417.88	1131.85	1869.31	1652.26
Q13564;Q13564-2;Q13564-3;Q13564-4	Q13564;Q13564-2;Q13564-3;Q13564-4	ULA1_HUMAN	NAE1	NEDD8-activating enzyme E1 regulatory subunit	2904.31	2738.97	2660.83	2167.76
Q13572	Q13572;Q13572-2	ITPK1_HUMAN	ITPK1	Inositol-tetrakisphosphate 1-kinase	8766.63	9331.79	8842.45	9810.77
Q13596;Q13596-2	Q13596;Q13596-2;Q13596-3	SNX1_HUMAN	SNX1	Sorting nexin-1	2550.17	1782.8	2147.52	2406.38
Q13610	Q13610	PWP1_HUMAN	PWP1	Periodic tryptophan protein 1 homolog		2050.75	1365.18	1948.24
Q13616	Q13616	CUL1_HUMAN	CUL1	Cullin-1	3585.28	3670.99	3617.65	4401.86
Q13617;Q13617-2	Q13617;Q13617-2	CUL2_HUMAN	CUL2	Cullin-2	2721.53	3851.47	3411.38	3823.39
Q13618;Q13618-2	Q13618;Q13618-2;Q13618-3	CUL3_HUMAN	CUL3	Cullin-3	5057.72	4118.33	5000.7	4117.8
Q13619	Q13619;Q13620;Q13619-2;Q13620-1;Q13620-3	CUL4A_HUMAN	CUL4A	Cullin-4A	5006	5598.35	4467.47	5067.64
Q13620;Q13620-1;Q13620-3	Q13620;Q13620-1;Q13620-3	CUL4B_HUMAN	CUL4B	Cullin-4B	2571.89	3493.08	2171.64	3987.56
Q13630	Q13630	FCL_HUMAN	GFUS	GDP-L-fucose synthase	2687.42	2044.94	2261.17	3361.38
Q13636;Q9UL26	Q13636;Q9UL26	RAB31_HUMAN;RB22A_HUMAN	RAB22A;RAB31	Ras-related protein Rab-31	873.901	1020.66	493.471
Q13685	Q13685	AAMP_HUMAN	AAMP	Angio-associated migratory cell protein	802.888	1696.33	1162.68	1867.18
Q13724;Q13724-2	Q13724;Q13724-2	MOGS_HUMAN	MOGS	Mannosyl-oligosaccharide glucosidase	1767.24	2524.48	1552.79	2150.3
Q13813;Q13813-2;Q13813-3	Q13813;Q13813-2;Q13813-3	SPTN1_HUMAN	SPTAN1	Spectrin alpha chain, non-erythrocytic 1	763.27	480.091	483.696	1050.55
Q13838;Q13838-2	Q13838;Q13838-2	DX39B_HUMAN	DDX39B	Spliceosome RNA helicase DDX39B	5189.14	5616.45	6060.97	5466.13
Q13868	Q13868;Q13868-2;Q13868-3	EXOS2_HUMAN	EXOSC2	Exosome complex component RRP4	4014.62	4447.44	4270.51	4647.79
Q13885	Q13885	TBB2A_HUMAN	TUBB2A	Tubulin beta-2A chain			720.527	708.59
Q13888;Q6P1K8	Q13888;Q6P1K8	T2H2L_HUMAN;TF2H2_HUMAN	GTF2H2;GTF2H2C	General transcription factor IIH subunit 2	544.546	427.007	939.038	459.783
Q13907;Q13907-2	Q13907;Q13907-2	IDI1_HUMAN	IDI1	Isopentenyl-diphosphate Delta-isomerase 1	9157.28	7958.72	7900.76	7907.86
Q14008;Q14008-2;Q14008-3	Q14008;Q14008-2;Q14008-3	CKAP5_HUMAN	CKAP5	Cytoskeleton-associated protein 5	2139.41	1937.39	2268.96	1969.11
Q14103;Q14103-2;Q14103-3;Q14103-4	Q14103;Q14103-4;Q14103-2;Q14103-3	HNRPD_HUMAN	HNRNPD	Heterogeneous nuclear ribonucleoprotein D0	6620.88	5982.43	7174.07	7181.27
Q14126	Q14126	DSG2_HUMAN	DSG2	Desmoglein-2	644.283	800.021	482.582	707.319
Q14139;Q14139-2	Q14139;Q14139-2	UBE4A_HUMAN	UBE4A	Ubiquitin conjugation factor E4 A	689.131	1237.47	1529.21	1169.14
Q14145	Q14145	KEAP1_HUMAN	KEAP1	Kelch-like ECH-associated protein 1	2050.01	1809.71	1897.15	1851.14
Q14151	Q14151	SAFB2_HUMAN	SAFB2	Scaffold attachment factor B2	1315.54	1716.7	1416.51	1684.96
Q14152	Q14152;Q14152-2	EIF3A_HUMAN	EIF3A	Eukaryotic translation initiation factor 3 subunit A	6131.98	5156.61	6490.07	5677.72
Q14157;Q14157-1;Q14157-3;Q14157-4;Q14157-5	Q14157;Q14157-1;Q14157-3;Q14157-4;Q14157-5	UBP2L_HUMAN	UBAP2L	Ubiquitin-associated protein 2-like	4442.64	3364.43	5328.69	3104.93
Q14160;Q14160-3	Q14160;Q14160-2;Q14160-3	SCRIB_HUMAN	SCRIB	Protein scribble homolog	2925.01	2383.34	2885	2975.61
Q14166	Q14166	TTL12_HUMAN	TTLL12	Tubulin--tyrosine ligase-like protein 12	7589.41	7821.51	7647.49	7276.32
Q14197	Q14197	ICT1_HUMAN	MRPL58	Large ribosomal subunit protein mL62	3631.23	4482.2	4051.53	3926.57
Q14203;Q14203-2;Q14203-3;Q14203-4;Q14203-5;Q14203-6	Q14203;Q14203-5;Q14203-2;Q14203-3;Q14203-4;Q14203-6	DCTN1_HUMAN	DCTN1	Dynactin subunit 1	3258.12	3906.53	3544.61	3964.74
Q14204	Q14204	DYHC1_HUMAN	DYNC1H1	Cytoplasmic dynein 1 heavy chain 1	14085.6	16293.4	14962	15135
Q14232;Q14232-2	Q14232;Q14232-2	EI2BA_HUMAN	EIF2B1	Translation initiation factor eIF-2B subunit alpha	690.541	626.012	1000.95	1083.25
Q14240;Q14240-2	Q14240;Q14240-2	IF4A2_HUMAN	EIF4A2	Eukaryotic initiation factor 4A-II	861.286	1534.61	1394.41	1274.05
Q14247	Q14247;Q14247-2;Q14247-3	SRC8_HUMAN	CTTN	Src substrate cortactin	5979.38	6301.39	6648.76	7830.06
Q14254	Q14254	FLOT2_HUMAN	FLOT2	Flotillin-2	3964.26	4835.33	4884.19	5164.37
Q14258	Q14258	TRI25_HUMAN	TRIM25	E3 ubiquitin/ISG15 ligase TRIM25	6675.4	6330.03	6005.46	6022.25
Q14331	Q14331	FRG1_HUMAN	FRG1	Protein FRG1	4229.57	4734.95	3417.28	2519.7
Q14344	Q14344;Q14344-2	GNA13_HUMAN	GNA13	Guanine nucleotide-binding protein subunit alpha-13	2948.84	3098.92	3205.11	3332.49
Q14376;Q14376-2	Q14376;Q14376-2	GALE_HUMAN	GALE	UDP-glucose 4-epimerase	629.716	770.246	764.954	732.805
Q14444;Q14444-2	Q14444;Q14444-2	CAPR1_HUMAN	CAPRIN1	Caprin-1	873.717	1077.59	1046.84	1553.13
Q14527;Q14527-2	Q14527;Q14527-2	HLTF_HUMAN	HLTF	Helicase-like transcription factor		3296.64	926.87	2786.8
Q14534	Q14534	ERG1_HUMAN	SQLE	Squalene monooxygenase	2292.71	1696.07	1977.19	1176.68
Q14558;Q14558-2	Q14558;Q14558-2	KPRA_HUMAN	PRPSAP1	Phosphoribosyl pyrophosphate synthase-associated protein 1	1148.81	863.073	691.943	990.49
Q14562	Q14562	DHX8_HUMAN	DHX8	ATP-dependent RNA helicase DHX8	993.95	749.53		555.961
Q14566	Q14566	MCM6_HUMAN	MCM6	DNA replication licensing factor MCM6	10587.6	10228.8	10898.2	11750.8
Q14667;Q14667-2;Q14667-3	Q14667;Q14667-2;Q14667-3	BLTP2_HUMAN	BLTP2	Bridge-like lipid transfer protein family member 2	12869.9	7095.39	8444.88	10169.9
Q14674	Q14674	ESPL1_HUMAN	ESPL1	Separin	4803.2	5455.03	3313.45	3613.84
Q14677;Q14677-2;Q14677-3	Q14677;Q14677-2;Q14677-3	EPN4_HUMAN	CLINT1	Clathrin interactor 1	975.288	566.925	1166.03	793.805
Q14683	Q14683	SMC1A_HUMAN	SMC1A	Structural maintenance of chromosomes protein 1A	1511.02	1490.63	1746.8	1643.03
Q14690	Q14690	RRP5_HUMAN	PDCD11	Protein RRP5 homolog	692.52	805.183	770.785	1120.65
Q14694;Q14694-2;Q14694-3	Q14694;Q14694-2;Q14694-3	UBP10_HUMAN	USP10	Ubiquitin carboxyl-terminal hydrolase 10	146834	128513	117060	16988.1
Q14697;Q14697-2	Q14697;Q14697-2	GANAB_HUMAN	GANAB	Neutral alpha-glucosidase AB	12877.5	17933.7	14267.3	16841.1
Q14746;Q14746-2	Q14746;Q14746-2	COG2_HUMAN	COG2	Conserved oligomeric Golgi complex subunit 2	806.755	1337.37	900.117	744.368
Q14765	Q14765	STAT4_HUMAN	STAT4	Signal transducer and activator of transcription 4	2031.51	2793.62	2992.74	2467.55
Q14790;Q14790-2;Q14790-4;Q14790-7;Q14790-8;Q14790-9	Q14790;Q14790-7;Q14790-9;Q14790-2;Q14790-3;Q14790-4;Q14790-5;Q14790-6;Q14790-8	CASP8_HUMAN	CASP8	Caspase-8	891.81	1002.51	1231.42	775.13
Q147X3;Q147X3-2	Q147X3;Q147X3-2	NAA30_HUMAN	NAA30	N-alpha-acetyltransferase 30	1843.19	3006.7	2692.28	1964.46
Q14839;Q14839-2;Q8TDI0	Q12873;Q14839;Q8TDI0;Q12873-2;Q12873-3;Q14839-2	CHD4_HUMAN;CHD5_HUMAN	CHD4;CHD5	Chromodomain-helicase-DNA-binding protein 4	1275.77	1042.03	1071.37	1951.47
Q14914;Q14914-2	Q14914;Q14914-2	PTGR1_HUMAN	PTGR1	Prostaglandin reductase 1	3988.08	4628.64	3695.84	4174.39
Q14973	Q14973	NTCP_HUMAN	SLC10A1	Hepatic sodium/bile acid cotransporter				226.698
Q14974	Q14974	IMB1_HUMAN	KPNB1	Importin subunit beta-1	2322.52	1372.03	2661.36	2022.21
Q14980;Q14980-2	Q14980;Q14980-3;Q14980-4;Q14980-2;Q14980-5	NUMA1_HUMAN	NUMA1	Nuclear mitotic apparatus protein 1	1803.1	1419.35	1486.8	1531.85
Q14997	Q14997	PSME4_HUMAN	PSME4	Proteasome activator complex subunit 4	1120.01	453.87	851.464	504.405
Q14CX7;Q14CX7-2	Q14CX7;Q14CX7-2	NAA25_HUMAN	NAA25	N-alpha-acetyltransferase 25, NatB auxiliary subunit	2200.3	1814.69	2366.44	1682.08
Q15003	Q15003	CND2_HUMAN	NCAPH	Condensin complex subunit 2	1930.18	1418.88	1518.13	1716.83
Q15005	Q15005	SPCS2_HUMAN	SPCS2	Signal peptidase complex subunit 2	3124.96	3093.45	2730.08	2839.56
Q15008	Q15008;Q15008-2;Q15008-3;Q15008-4	PSMD6_HUMAN	PSMD6	26S proteasome non-ATPase regulatory subunit 6	7797.14	4494.55	7966.58	6720.98
Q15018	Q15018	ABRX2_HUMAN	ABRAXAS2	BRISC complex subunit Abraxas 2	1910.54	2376.38	1466.3	1553.07
Q15019;Q15019-2	Q15019;Q15019-2	SEPT2_HUMAN	SEPTIN2	Septin-2	9500.48	10025.5	9099.57	9905.58
Q15020	Q15020;Q15020-2;Q15020-4	SART3_HUMAN	SART3	Squamous cell carcinoma antigen recognized by T-cells 3	4967.64	4676.45	5168.88	4563.02
Q15021	Q15021	CND1_HUMAN	NCAPD2	Condensin complex subunit 1	1269.18	433.112	1515.08	844.532
Q15024	Q15024	EXOS7_HUMAN	EXOSC7	Exosome complex component RRP42	3245.36	4908.78	3790.87	4422.92
Q15029;Q15029-2	Q15029;Q15029-2;Q15029-3	U5S1_HUMAN	EFTUD2	116 kDa U5 small nuclear ribonucleoprotein component	5878.89	5765.75	6274.58	6218.55
Q15036;Q15036-2	Q15036;Q15036-2	SNX17_HUMAN	SNX17	Sorting nexin-17	396.292	1105.92	783.259	396.759
Q15042;Q15042-3;Q15042-4	Q15042;Q15042-3;Q15042-4	RB3GP_HUMAN	RAB3GAP1	Rab3 GTPase-activating protein catalytic subunit	132.927		118.409	276.982
Q15046;Q15046-2	Q15046;Q15046-2	SYK_HUMAN	KARS1	Lysine--tRNA ligase	10426	9973.65	11829.3	12269.2
Q15047;Q15047-2;Q15047-3	Q15047;Q15047-2;Q15047-3	SETB1_HUMAN	SETDB1	Histone-lysine N-methyltransferase SETDB1	465.87	510.914	360.848	413.858
Q15054;Q15054-2;Q15054-3	Q15054;Q15054-2;Q15054-3	DPOD3_HUMAN	POLD3	DNA polymerase delta subunit 3	2207.52	2655.35	2328.24	2109.71
Q15057	Q15057	ACAP2_HUMAN	ACAP2	Arf-GAP with coiled-coil, ANK repeat and PH domain-containing protein 2	1764.49	2549.75	4298.06	2211.49
Q15084;Q15084-2;Q15084-3;Q15084-4;Q15084-5	Q15084;Q15084-2;Q15084-3;Q15084-4;Q15084-5	PDIA6_HUMAN	PDIA6	Protein disulfide-isomerase A6	9554.01	6724.46	9964.46	8597.4
Q15102	Q15102	PA1B3_HUMAN	PAFAH1B3	Platelet-activating factor acetylhydrolase IB subunit alpha1	17647.8	17800.7	17403.5	19078.4
Q15126	Q15126	PMVK_HUMAN	PMVK	Phosphomevalonate kinase	1886.93	1431.27	1652.82	1814.76
Q15149;Q15149-2;Q15149-3;Q15149-4;Q15149-5;Q15149-6;Q15149-7;Q15149-8;Q15149-9	Q15149;Q15149-2;Q15149-3;Q15149-4;Q15149-5;Q15149-6;Q15149-7;Q15149-8;Q15149-9	PLEC_HUMAN	PLEC	Plectin	3747.63	3530.6	4308.44	4446.4
Q15181	Q15181	IPYR_HUMAN	PPA1	Inorganic pyrophosphatase	16254.4	18179.5	17166	18254.1
Q15185;Q15185-3;Q15185-4	Q15185;Q15185-2;Q15185-3;Q15185-4	TEBP_HUMAN	PTGES3	Prostaglandin E synthase 3	13628.5	10491.3	12904.7	14675.7
Q15208;Q9Y2H1;Q9Y2H1-2	Q15208;Q9Y2H1;Q9Y2H1-2	ST38L_HUMAN;STK38_HUMAN	STK38;STK38L	Serine/threonine-protein kinase 38	2124.96	1257.59		1703.25
Q15233	Q15233;Q15233-2	NONO_HUMAN	NONO	Non-POU domain-containing octamer-binding protein	5306.88	5326.04	5640.43	5099.18
Q15257;Q15257-2	Q15257;Q15257-2;Q15257-3;Q15257-4	PTPA_HUMAN	PTPA	Serine/threonine-protein phosphatase 2A activator	4870.71	3933.15	5569.97	4169.43
Q15262;Q15262-2;Q15262-3;Q15262-4	P28827;Q15262;Q15262-2;Q15262-3;Q15262-4;P28827-2	PTPRK_HUMAN	PTPRK	Receptor-type tyrosine-protein phosphatase kappa	826.817	1235.37	1361.44	1071.76
Q15269	Q15269	PWP2_HUMAN	PWP2	Periodic tryptophan protein 2 homolog	1407.94	1327.26	1238.61	1408.73
Q15286	Q15286;Q15286-2	RAB35_HUMAN	RAB35	Ras-related protein Rab-35	834.111	1014.02	1227.65	1190.81
Q15291;Q15291-2	Q15291;Q15291-2	RBBP5_HUMAN	RBBP5	Retinoblastoma-binding protein 5		583.848	454.612	505.055
Q15334	Q15334	L2GL1_HUMAN	LLGL1	Lethal(2) giant larvae protein homolog 1	2182.79	1256.57	1959.49	1328.71
Q15363	Q15363	TMED2_HUMAN	TMED2	Transmembrane emp24 domain-containing protein 2	954.414	1404.47	1216.61	1525.68
Q15365	Q15365	PCBP1_HUMAN	PCBP1	Poly(rC)-binding protein 1	67285.4	59564.8	63485.5	66108.8
Q15366-3;Q15366-4;Q15366-6;Q15366-7	Q15366;Q15366-2;Q15366-3;Q15366-4;Q15366-5;Q15366-6;Q15366-7;Q15366-8	PCBP2_HUMAN	PCBP2	Isoform 3 of Poly(rC)-binding protein 2	73112.4	60752.1	66488.7	67217.1
Q15369	Q15369;Q15369-2	ELOC_HUMAN	ELOC	Elongin-C	4071.25	4706.25	3947.67	4297.15
Q15370;Q15370-2	Q15370;Q15370-2	ELOB_HUMAN	ELOB	Elongin-B	2694.94	4936.71	2995.3	3272.32
Q15382	Q15382	RHEB_HUMAN	RHEB	GTP-binding protein Rheb	2127.99	2971.28	2490.33	2204.07
Q15386	Q15386	UBE3C_HUMAN	UBE3C	Ubiquitin-protein ligase E3C	3825.91	4102.67	3320.29	1132.2
Q15392;Q15392-2	Q15392;Q15392-2	DHC24_HUMAN	DHCR24	Delta(24)-sterol reductase	2114.16	3095.63	2204.2	3037.84
Q15393	Q15393	SF3B3_HUMAN	SF3B3	Splicing factor 3B subunit 3	9449.91	11103.2	8980.53	10213.1
Q15418;Q15418-2;Q15418-3;Q15418-4	Q15418;Q15418-2;Q15418-3;Q15418-4	KS6A1_HUMAN	RPS6KA1	Ribosomal protein S6 kinase alpha-1	1101.75	779.734	1301.17	1197.45
Q15435;Q15435-2	Q15435;Q15435-2;Q15435-3;Q15435-4;Q15435-5	PP1R7_HUMAN	PPP1R7	Protein phosphatase 1 regulatory subunit 7	1694.37	1846.55	1895.23	1915.5
Q15436	Q15436	SC23A_HUMAN	SEC23A	Protein transport protein Sec23A	7868.23	7149.3	6976.42	7927.01
Q15437	Q15437	SC23B_HUMAN	SEC23B	Protein transport protein Sec23B	9354.72	9210.18	9624.84	8802.04
Q15477	Q15477	SKI2_HUMAN	SKIC2	Superkiller complex protein 2	2056.92	2055.12	1799.13	1595.33
Q15645	Q15645	PCH2_HUMAN	TRIP13	Pachytene checkpoint protein 2 homolog	2948.07	2694.18	3422.93	2337.54
Q15654	Q15654	TRIP6_HUMAN	TRIP6	Thyroid receptor-interacting protein 6	1655.74	2089.81	1500.93	1292.96
Q15691	Q15691	MARE1_HUMAN	MAPRE1	Microtubule-associated protein RP/EB family member 1	903.596	994.223	1398.89	1891.67
Q15717;Q15717-2	Q15717;Q15717-2	ELAV1_HUMAN	ELAVL1	ELAV-like protein 1	10140.2	9017.59	8567.82	9157.78
Q15738	Q15738	NSDHL_HUMAN	NSDHL	Sterol-4-alpha-carboxylate 3-dehydrogenase, decarboxylating	7477.23	8672.5	7038.21	7463.43
Q15742;Q15742-3	Q13506;Q15742;Q15742-2;Q15742-3;Q13506-2	NAB2_HUMAN	NAB2	NGFI-A-binding protein 2	2317.1	2293.45	2490.24	2582.04
Q15751	Q15751	HERC1_HUMAN	HERC1	Probable E3 ubiquitin-protein ligase HERC1	1122.12	432.843	478.013
Q15758	Q15758;Q15758-2;Q15758-3	AAAT_HUMAN	SLC1A5	Neutral amino acid transporter B(0)	5698.66	4181.29	4588.69	4447.95
Q15773	Q15773	MLF2_HUMAN	MLF2	Myeloid leukemia factor 2	1182.51	1291.03	1154.91	906.889
Q15814	Q15814	TBCC_HUMAN	TBCC	Tubulin-specific chaperone C	1401.72	2102.9	2566.3	1713.15
Q15819	Q15819	UB2V2_HUMAN	UBE2V2	Ubiquitin-conjugating enzyme E2 variant 2	1607.56	1399.49	1630.51	1365.73
Q15907	P62491;Q15907;P62491-2;Q15907-2	RB11B_HUMAN	RAB11B	Ras-related protein Rab-11B	12576.3	16188.6	14765.1	14954.6
Q16143	Q16143	SYUB_HUMAN	SNCB	Beta-synuclein	349.503
Q16181;Q16181-2	Q16181;Q16181-2	SEPT7_HUMAN	SEPTIN7	Septin-7	4610.01	4332.65	4432.76	4551.53
Q16186	Q16186	ADRM1_HUMAN	ADRM1	Proteasomal ubiquitin receptor ADRM1	3552.82	3901.45	3814.1	3347.38
Q16204	Q16204	CCDC6_HUMAN	CCDC6	Coiled-coil domain-containing protein 6	823.271	766.433	380.622	637.539
Q16222;Q16222-2;Q16222-3	Q16222;Q3KQV9;Q16222-2;Q16222-3	UAP1_HUMAN	UAP1	UDP-N-acetylhexosamine pyrophosphorylase	3052.94	3415.41	2630.05	2896.23
Q16401;Q16401-2	Q16401;Q16401-2	PSMD5_HUMAN	PSMD5	26S proteasome non-ATPase regulatory subunit 5	2217.31	2071.5	2284.36	1763.94
Q16512;Q16512-2	Q16512;Q16512-2	PKN1_HUMAN	PKN1	Serine/threonine-protein kinase N1	1358.23	2120.71	1851.14	1553.66
Q16513;Q16513-2;Q16513-3;Q16513-4;Q16513-5	Q16513;Q16513-2;Q16513-3;Q16513-4;Q16513-5	PKN2_HUMAN	PKN2	Serine/threonine-protein kinase N2	571.74	544.193	919.035	475.366
Q16531	Q16531	DDB1_HUMAN	DDB1	DNA damage-binding protein 1	8802.53	11844.5	9017.69	11649.2
Q16540	Q16540	RM23_HUMAN	MRPL23	Large ribosomal subunit protein uL23m	1156.5	1229.9	1257.04	1164.37
Q16543	Q16543	CDC37_HUMAN	CDC37	Hsp90 co-chaperone Cdc37	7056.21	6008.02	7468.97	6705.6
Q16563;Q16563-2	Q16563;Q16563-2	SYPL1_HUMAN	SYPL1	Synaptophysin-like protein 1	7134.01	5016.94	6414.95	6409.98
Q16576	Q16576;Q16576-2	RBBP7_HUMAN	RBBP7	Histone-binding protein RBBP7	8750.8	8489.75	6706.96	10589.3
Q16629;Q16629-2;Q16629-3;Q16629-4	Q16629;Q16629-2;Q16629-3;Q16629-4	SRSF7_HUMAN	SRSF7	Serine/arginine-rich splicing factor 7	3628.52	4292.64	3467.92	3601.9
Q16656;Q16656-2;Q16656-4	Q16656;Q16656-4;Q16656-2	NRF1_HUMAN	NRF1	Nuclear respiratory factor 1		429.158	585.207	634.735
Q16658	Q16658	FSCN1_HUMAN	FSCN1	Fascin	5120.6	5410.62	4701.4	5360.75
Q16698;Q16698-2	Q16698;Q16698-2	DECR_HUMAN	DECR1	2,4-dienoyl-CoA reductase [(3E)-enoyl-CoA-producing], mitochondrial	6953.49	10001.5	9029.79	16367.9
Q16706	Q16706	MA2A1_HUMAN	MAN2A1	Alpha-mannosidase 2	1289.92	1807.19	854.742	734.764
Q16719	Q16719;Q16719-2	KYNU_HUMAN	KYNU	Kynureninase	10168	10608.7	9173.71	9461.61
Q16762	Q16762	THTR_HUMAN	TST	Thiosulfate sulfurtransferase	1936.25	1550.3	1789.02	1557.77
Q16763	Q16763	UBE2S_HUMAN	UBE2S	Ubiquitin-conjugating enzyme E2 S	923.389	1102.13	451.709	417.084
Q16775;Q16775-2	Q16775;Q16775-2	GLO2_HUMAN	HAGH	Hydroxyacylglutathione hydrolase, mitochondrial	1294.75	765.043	1053.4	1005.55
Q16787;Q16787-3	Q16787;Q16787-1;Q16787-3;Q16787-4	LAMA3_HUMAN	LAMA3	Laminin subunit alpha-3	866.065	1545.25	535.164
Q16795	Q16795	NDUA9_HUMAN	NDUFA9	NADH dehydrogenase [ubiquinone] 1 alpha subcomplex subunit 9, mitochondrial		869.136	1118.41	831.261
Q16822	Q16822;Q16822-2;Q16822-3	PCKGM_HUMAN	PCK2	Phosphoenolpyruvate carboxykinase [GTP], mitochondrial	2790.07	2750.95	2927.59	2518.73
Q16836;Q16836-2;Q16836-3	Q16836;Q16836-2;Q16836-3	HCDH_HUMAN	HADH	Hydroxyacyl-coenzyme A dehydrogenase, mitochondrial	9419.78	18103.6	13249.6	18126.5
Q16851;Q16851-2	Q16851;Q16851-2	UGPA_HUMAN	UGP2	UTP--glucose-1-phosphate uridylyltransferase	9972.93	10613	11240.6	10499.8
Q16881;Q16881-2;Q16881-3;Q16881-4;Q16881-5;Q16881-6	Q16881;Q16881-4;Q16881-5;Q16881-2;Q16881-3;Q16881-6;Q16881-7	TRXR1_HUMAN	TXNRD1	Thioredoxin reductase 1, cytoplasmic	1470.41	1925.7	1953.3	2273.08
Q16891;Q16891-2;Q16891-3;Q16891-4	Q16891;Q16891-2;Q16891-3;Q16891-4	MIC60_HUMAN	IMMT	MICOS complex subunit MIC60	1093.15	856.669	897.369	1571.17
Q1KMD3	Q1KMD3	HNRL2_HUMAN	HNRNPUL2	Heterogeneous nuclear ribonucleoprotein U-like protein 2	2344.2	2810.8	2616.74	2677.4
Q29RF7	Q29RF7	PDS5A_HUMAN	PDS5A	Sister chromatid cohesion protein PDS5 homolog A	1050.72	461.083	750.678	905.574
Q2M389	Q2M389;Q2M389-2	WASC4_HUMAN	WASHC4	WASH complex subunit 4	1001.95	890.514	1206.2	1095.87
Q2NL82	Q2NL82	TSR1_HUMAN	TSR1	Pre-rRNA-processing protein TSR1 homolog	905.658	728.825	954.743	957.037
Q2T9J0;Q2T9J0-2	Q2T9J0;Q2T9J0-2	TYSD1_HUMAN	TYSND1	Peroxisomal leader peptide-processing protease	1237.23	1186.52	1329.61	2344.3
Q2TAL8	Q2TAL8	QRIC1_HUMAN	QRICH1	Transcriptional regulator QRICH1	751.688	598.334	962.696	902.49
Q2TAY7	Q2TAY7	SMU1_HUMAN	SMU1	WD40 repeat-containing protein SMU1	1303.83	1700.6	896.6	1669.65
Q2VPK5;Q2VPK5-3;Q2VPK5-5	Q2VPK5;Q2VPK5-3;Q2VPK5-5	CTU2_HUMAN	CTU2	Cytoplasmic tRNA 2-thiolation protein 2	1013.79	1243.56	1438.14	1283.47
Q32P41	Q32P41	TRM5_HUMAN	TRMT5	tRNA (guanine(37)-N1)-methyltransferase	2660.14	2235.54	2644.8	3416.11
Q32P44;Q32P44-2	Q32P44;Q32P44-2	EMAL3_HUMAN	EML3	Echinoderm microtubule-associated protein-like 3	1913.47	1523.23	1560.02	820.874
Q3B726	Q3B726	RPA43_HUMAN	POLR1F	DNA-directed RNA polymerase I subunit RPA43				166.162
Q3LXA3	Q3LXA3;Q3LXA3-2	TKFC_HUMAN	TKFC	Triokinase/FMN cyclase	2127.37	1634.74	2093.75	1720.12
Q3MHD2;Q3MHD2-2	Q3MHD2;Q3MHD2-2	LSM12_HUMAN	LSM12	Protein LSM12	5301.15	5026.11	4564.18	4206.89
Q3SXM5;Q3SXM5-2	Q3SXM5;Q3SXM5-2	HSDL1_HUMAN	HSDL1	Inactive hydroxysteroid dehydrogenase-like protein 1	2873.16	1988.88	2562.65	3117.55
Q3YEC7;Q3YEC7-2;Q3YEC7-3	Q3YEC7;Q3YEC7-3;Q3YEC7-2;Q3YEC7-4;Q3YEC7-5;Q3YEC7-6	RABL6_HUMAN	RABL6	Rab-like protein 6	467.64	941.579	430.478	635.035
Q460N3	Q460N3	PAR15_HUMAN	PARP15	Protein mono-ADP-ribosyltransferase PARP15	4553.18		3931.85
Q49AR2;Q49AR2-2;Q49AR2-3	Q49AR2;Q49AR2-2;Q49AR2-3	CE022_HUMAN	C5orf22	UPF0489 protein C5orf22	1416.31	1818.66	846.781	1355.35
Q4G0N4;Q4G0N4-3	Q4G0N4;Q4G0N4-2;Q4G0N4-3	NAKD2_HUMAN	NADK2	NAD kinase 2, mitochondrial	1334.69	1644.1	926.216	1510.42
Q4G176	Q4G176	ACSF3_HUMAN	ACSF3	Malonate--CoA ligase ACSF3, mitochondrial	1434.93	1469.07	1313.67	1736.38
Q4ZG55	Q4ZG55;Q4ZG55-4	GREB1_HUMAN	GREB1	Protein GREB1	1557.51	1992.55	2097.64	1507.9
Q504Q3;Q504Q3-2;Q504Q3-3	Q504Q3;Q504Q3-2;Q504Q3-3	PAN2_HUMAN	PAN2	PAN2-PAN3 deadenylation complex catalytic subunit PAN2	1018.65	539.267	634.06	297.4
Q53EL6;Q53EL6-2	Q53EL6;Q53EL6-2	PDCD4_HUMAN	PDCD4	Programmed cell death protein 4	4072.55	1649.59	4398.61	3654.48
Q53FT3	Q53FT3	HIKES_HUMAN	HIKESHI	Protein Hikeshi	2426.52	2804.45	2381.64	2920.18
Q53GA4	Q53GA4	PHLA2_HUMAN	PHLDA2	Pleckstrin homology-like domain family A member 2	833.252	489.437	761.849	403.304
Q53GS9;Q53GS9-2;Q53GS9-3	Q53GS9;Q53GS9-2;Q53GS9-3	SNUT2_HUMAN	USP39	U4/U6.U5 tri-snRNP-associated protein 2	1176.92	1244.29	1136.01
Q53H12	Q53H12	AGK_HUMAN	AGK	Acylglycerol kinase, mitochondrial	1134.04	1158.99	965.157	1014.92
Q53H96;Q53H96-2	Q53H96;Q53H96-2	P5CR3_HUMAN	PYCR3	Pyrroline-5-carboxylate reductase 3	9834.56	9093.29	8903.09	7110.24
Q58FF6	Q58FF6	H90B4_HUMAN	HSP90AB4P	Putative heat shock protein HSP 90-beta 4	1078.38	1375.96	1118.09	1577.88
Q5D862	Q5D862	FILA2_HUMAN	FLG2	Filaggrin-2				319.24
Q5GLZ8;Q5GLZ8-2;Q5GLZ8-3;Q5GLZ8-6	Q5GLZ8;Q5GLZ8-2;Q5GLZ8-3;Q5GLZ8-6	HERC4_HUMAN	HERC4	Probable E3 ubiquitin-protein ligase HERC4	2041.42	1674.17	2634.29	1766.36
Q5H9R7;Q5H9R7-2;Q5H9R7-5;Q5H9R7-6	Q5H9R7;Q5H9R7-2;Q5H9R7-5;Q5H9R7-6	PP6R3_HUMAN	PPP6R3	Serine/threonine-protein phosphatase 6 regulatory subunit 3	2953.4	3689.25	3492.46	3227.37
Q5JRX3;Q5JRX3-2	Q5JRX3;Q5JRX3-2;Q5JRX3-3	PREP_HUMAN	PITRM1	Presequence protease, mitochondrial	1020.28	1158.08	1130.78	973.173
Q5JSH3;Q5JSH3-2;Q5JSH3-3;Q5JSH3-4	Q5JSH3;Q5JSH3-2;Q5JSH3-3;Q5JSH3-4	WDR44_HUMAN	WDR44	WD repeat-containing protein 44		2102.49	1038.57	1829.52
Q5JTZ9	Q5JTZ9	SYAM_HUMAN	AARS2	Alanine--tRNA ligase, mitochondrial	825.487	866.983	689.107	733.23
Q5JVF3;Q5JVF3-2;Q5JVF3-3;Q5JVF3-4	Q5JVF3;Q5JVF3-2;Q5JVF3-3;Q5JVF3-4	PCID2_HUMAN	PCID2	PCI domain-containing protein 2	1395.05	1451.6	1704.44	763.005
Q5MNZ6	Q5MNZ6	WIPI3_HUMAN	WDR45B	WD repeat domain phosphoinositide-interacting protein 3	593.355	689.866	564.845	829.551
Q5RKV6	Q5RKV6	EXOS6_HUMAN	EXOSC6	Exosome complex component MTR3			1115.49
Q5SRE5	Q5SRE5;Q5SRE5-2	NU188_HUMAN	NUP188	Nucleoporin NUP188		801.034	575.63
Q5SRH9-4;Q5SRH9-5;Q5SRH9-6	Q5SRH9;Q5SRH9-2;Q5SRH9-4;Q5SRH9-5;Q5SRH9-6	TT39A_HUMAN	TTC39A	Isoform 4 of Tetratricopeptide repeat protein 39A	1504.53	1156.13	1605.22	1374.57
Q5SWX8;Q5SWX8-2;Q5SWX8-3;Q5SWX8-4	Q5SWX8;Q5SWX8-2;Q5SWX8-3;Q5SWX8-4	ODR4_HUMAN	ODR4	Protein odr-4 homolog	739.895	591.214	639.646	878.08
Q5SZK8	Q5SZK8;Q5SZK8-2	FREM2_HUMAN	FREM2	FRAS1-related extracellular matrix protein 2	6758.81	8874.99	6349.69	8285.25
Q5T0W9	Q5T0W9	FA83B_HUMAN	FAM83B	Protein FAM83B	328.082
Q5T1M5;Q5T1M5-2	Q5T1M5;Q5T1M5-2	FKB15_HUMAN	FKBP15	FK506-binding protein 15		375.541	518.047
Q5T2T1	Q5T2T1	MPP7_HUMAN	MPP7	MAGUK p55 subfamily member 7	1345.38	1935.69		2256.02
Q5T4S7;Q5T4S7-2;Q5T4S7-3;Q5T4S7-4	Q5T4S7;Q5T4S7-2;Q5T4S7-3;Q5T4S7-4;Q5T4S7-5	UBR4_HUMAN	UBR4	E3 ubiquitin-protein ligase UBR4	3911.04	3545.17	3511.61	3343.25
Q5T6V5	Q5T6V5	QNG1_HUMAN	QNG1	Queuosine 5'-phosphate N-glycosylase/hydrolase	5731.5	5377.59	5052.24	4765.32
Q5T8I3;Q5T8I3-2	Q5T8I3;Q5T8I3-2	EEIG2_HUMAN	EEIG2	EEIG family member 2	1946.3	2040.04	1536.7	1786.39
Q5TA45;Q5TA45-2;Q5TA45-3;Q5TA45-4;Q5TA45-5	Q5TA45;Q5TA45-2;Q5TA45-3;Q5TA45-4;Q5TA45-5	INT11_HUMAN	INTS11	Integrator complex subunit 11	1210.81	1695.42	1753.28	759.585
Q5TAQ9;Q5TAQ9-2	Q5TAQ9;Q5TAQ9-2	DCAF8_HUMAN	DCAF8	DDB1- and CUL4-associated factor 8	1723.85	2420.28	1812.4	1386.01
Q5TC63;Q5TC63-2;Q5TC63-3	Q5TC63;Q5TC63-2;Q5TC63-3	GRTP1_HUMAN	GRTP1	Growth hormone-regulated TBC protein 1		303.375	950.672
Q5TDH0;Q5TDH0-2;Q5TDH0-3	Q5TDH0;Q5TDH0-2;Q5TDH0-3	DDI2_HUMAN	DDI2	Protein DDI1 homolog 2	2100.34	1345.23	1238.76	926.257
Q5TFE4	Q5TFE4;Q5TFE4-2	NT5D1_HUMAN	NT5DC1	5'-nucleotidase domain-containing protein 1	1628.9	1491.01	1515.76	1324.81
Q5VIR6	Q5VIR6	VPS53_HUMAN	VPS53	Vacuolar protein sorting-associated protein 53 homolog			539.581	520.368
Q5VT25;Q5VT25-2;Q5VT25-3;Q5VT25-4;Q5VT25-5;Q5VT25-6	Q5VT25;Q5VT25-2;Q5VT25-3;Q5VT25-4;Q5VT25-5;Q5VT25-6	MRCKA_HUMAN	CDC42BPA	Serine/threonine-protein kinase MRCK alpha		9688.89
Q5VTR2	O75150;Q5VTR2;O75150-3;O75150-4	BRE1A_HUMAN	RNF20	E3 ubiquitin-protein ligase BRE1A	597.315	539.509	881.038	651.419
Q5VWZ2	Q5VWZ2;Q5VWZ2-2	LYPL1_HUMAN	LYPLAL1	Lysophospholipase-like protein 1	4942.24	6036.42	5873.28	6690.37
Q5VYK3	Q5VYK3	ECM29_HUMAN	ECPAS	Proteasome adapter and scaffold protein ECM29	2496.27	2467.34	3251.24	2827.95
Q5VZM2;Q5VZM2-2;Q7L523	Q5VZM2;Q7L523;Q5VZM2-2	RRAGA_HUMAN;RRAGB_HUMAN	RRAGA;RRAGB	Ras-related GTP-binding protein B	3350.83	3234.57	2893.39	2569.29
Q5W111	Q5W111;Q5W111-2	SPRY7_HUMAN	SPRYD7	SPRY domain-containing protein 7	1648.77	2566.1	2358.28	2126.68
Q5XPI4;Q5XPI4-2	Q5XPI4;Q5XPI4-2	RN123_HUMAN	RNF123	E3 ubiquitin-protein ligase RNF123	101402	70490.5	77270.2	130869
Q63HN8;Q63HN8-4	Q63HN8;Q63HN8-4	RN213_HUMAN	RNF213	E3 ubiquitin-protein ligase RNF213	2264.66	2652.34	2699.66	2627.07
Q658Y4	Q658Y4	F91A1_HUMAN	FAM91A1	Protein FAM91A1	2273.11	2764.24	2591.2	2429.39
Q66K14;Q66K14-2	Q66K14;Q66K14-2	TBC9B_HUMAN	TBC1D9B	TBC1 domain family member 9B	1582.87	1557.1	2019.46	1351.59
Q66K74;Q66K74-2	Q66K74;Q66K74-2	MAP1S_HUMAN	MAP1S	Microtubule-associated protein 1S	719.658	1151.12	711.294
Q66PJ3;Q66PJ3-1;Q66PJ3-10;Q66PJ3-2;Q66PJ3-3;Q66PJ3-4;Q66PJ3-7;Q66PJ3-9	Q66PJ3;Q66PJ3-4;Q66PJ3-1;Q66PJ3-10;Q66PJ3-2;Q66PJ3-3;Q66PJ3-7;Q66PJ3-9	AR6P4_HUMAN	ARL6IP4	ADP-ribosylation factor-like protein 6-interacting protein 4	631.427	612.098	394.764	1009.92
Q69YN2;Q69YN2-3	Q69YN2;Q69YN2-3	C19L1_HUMAN	CWF19L1	CWF19-like protein 1	2397.37	2504.27	2122.52	2428.58
Q6AI08	Q6AI08	HEAT6_HUMAN	HEATR6	HEAT repeat-containing protein 6	2713.15	2223.65	2747.53	1945.16
Q6DD88	Q6DD88	ATLA3_HUMAN	ATL3	Atlastin-3	729.533	1282.1	1298.55	1287.66
Q6DKI1;Q6DKI1-2	Q6DKI1;Q6DKI1-2	RL7L_HUMAN	RPL7L1	Ribosomal protein uL30-like	634.319	1638.82	1100.67	1514.19
Q6FI81;Q6FI81-3	Q6FI81;Q6FI81-2;Q6FI81-3	CPIN1_HUMAN	CIAPIN1	Anamorsin	3015.46	3416.4	3111.25	3890.19
Q6FIF0;Q6FIF0-2	Q6FIF0;Q6FIF0-2	ZFAN6_HUMAN	ZFAND6	AN1-type zinc finger protein 6	1192.02	2094.91	746.49	580.21
Q6GMV2	Q6GMV2	SMYD5_HUMAN	SMYD5	Histone-lysine N-trimethyltransferase SMYD5	3130.14	3011.64	3370.26	2641.43
Q6GQQ9;Q6GQQ9-2	Q6GQQ9;Q6GQQ9-2	OTU7B_HUMAN	OTUD7B	OTU domain-containing protein 7B	13594.8	17678.8	14222.6	1326.78
Q6GYQ0-5	Q6GYQ0;Q6GYQ0-2;Q6GYQ0-4;Q6GYQ0-5;Q6GYQ0-6;Q6GYQ0-7	RGPA1_HUMAN	RALGAPA1	Isoform 5 of Ral GTPase-activating protein subunit alpha-1	169.009		225.961	314.001
Q6IA69	Q6IA69	NADE_HUMAN	NADSYN1	Glutamine-dependent NAD(+) synthetase	2861.38	2506.58	2443.63	2356.49
Q6IA86;Q6IA86-2;Q6IA86-3;Q6IA86-4;Q6IA86-5;Q6IA86-6;Q6IA86-7	Q6IA86;Q6IA86-2;Q6IA86-3;Q6IA86-4;Q6IA86-5;Q6IA86-6;Q6IA86-7	ELP2_HUMAN	ELP2	Elongator complex protein 2	1767.77	2045.77	2304.72	2765.63
Q6IAN0	Q6IAN0	DRS7B_HUMAN	DHRS7B	Dehydrogenase/reductase SDR family member 7B	1584.2	1578.38	1412.23	1436.78
Q6IN85;Q6IN85-2	Q6IN85;Q6IN85-2;Q6IN85-4	P4R3A_HUMAN	PPP4R3A	Serine/threonine-protein phosphatase 4 regulatory subunit 3A	1802.34	1033.18	2223.08	1716.1
Q6IQ22	Q6IQ22	RAB12_HUMAN	RAB12	Ras-related protein Rab-12	698.297	841.709	597.432	895.251
Q6IQ26;Q6IQ26-2;Q6ZUT9;Q6ZUT9-2	Q6IQ26;Q6ZUT9;Q6ZUT9-2;Q6IQ26-2	DEN5A_HUMAN;DEN5B_HUMAN	DENND5A;DENND5B	DENN domain-containing protein 5A	8185.12	7318	9320.03
Q6L8Q7;Q6L8Q7-2	Q6L8Q7;Q6L8Q7-2	PDE12_HUMAN	PDE12	2',5'-phosphodiesterase 12	4745.81	5161.31	5177.83	4974.58
Q6NVY1;Q6NVY1-2	Q6NVY1;Q6NVY1-2	HIBCH_HUMAN	HIBCH	3-hydroxyisobutyryl-CoA hydrolase, mitochondrial		457.669	268.081	467.202
Q6NXE6;Q6NXE6-2	Q6NXE6;Q6NXE6-2	ARMC6_HUMAN	ARMC6	Armadillo repeat-containing protein 6	1049.68	642.489	1257.74	492.197
Q6NXG1;Q6NXG1-2;Q6NXG1-3;Q6NXG1-4;Q6NXG1-5	Q6NXG1;Q9H6T0;Q6NXG1-3;Q6NXG1-2;Q6NXG1-4;Q6NXG1-5;Q9H6T0-2	ESRP1_HUMAN	ESRP1	Epithelial splicing regulatory protein 1	3166.28	4346.98	4178.49	3899.7
Q6NYC1;Q6NYC1-2;Q6NYC1-3	Q6NYC1;Q6NYC1-2;Q6NYC1-3	JMJD6_HUMAN	JMJD6	Bifunctional arginine demethylase and lysyl-hydroxylase JMJD6	2067.29	977.23	3338.51	1189.78
Q6P158	Q6P158	DHX57_HUMAN	DHX57	Putative ATP-dependent RNA helicase DHX57	1227.1	1866.35	1254.43	1055.24
Q6P1J9	Q6P1J9	CDC73_HUMAN	CDC73	Parafibromin	2136.39	1250.4	920.596	1600.63
Q6P1L8	Q6P1L8	RM14_HUMAN	MRPL14	Large ribosomal subunit protein uL14m	418.621	336.02	606.059	708.867
Q6P1M0	Q6P1M0;Q6P1M0-2	S27A4_HUMAN	SLC27A4	Long-chain fatty acid transport protein 4	3377.67	1664.36	2839.72	2687.32
Q6P1M3;Q6P1M3-2	Q6P1M3;Q6P1M3-2	L2GL2_HUMAN	LLGL2	LLGL scribble cell polarity complex component 2	2388.43	2238.9	2115.81	1971.19
Q6P1N0;Q6P1N0-2	Q6P1N0;Q6P1N0-2	C2D1A_HUMAN	CC2D1A	Coiled-coil and C2 domain-containing protein 1A	3101.04	2536.28	2621.14	2145.13
Q6P1N9;Q6P1N9-2	Q6P1N9;Q6P1N9-2	TATD1_HUMAN	TATDN1	Deoxyribonuclease TATDN1	1572.51	1811.64	1541.84	2078.38
Q6P1Q9;Q6P1Q9-2	Q6P1Q9;Q6P1Q9-2	MET2B_HUMAN	METTL2B	tRNA N(3)-methylcytidine methyltransferase METTL2B	950.28	667.467	524.104
Q6P1X6;Q6P1X6-2	Q6P1X6;Q6P1X6-2	CH082_HUMAN	C8orf82	UPF0598 protein C8orf82	1136.97	891.242	1272.7	1474.91
Q6P2E9	Q6P2E9	EDC4_HUMAN	EDC4	Enhancer of mRNA-decapping protein 4	1683.29	1183.75	1358.24	1112.71
Q6P2Q9	Q6P2Q9	PRP8_HUMAN	PRPF8	Pre-mRNA-processing-splicing factor 8	5314.56	5330.55	5365.85	5188.3
Q6P3W7	Q6P3W7	SCYL2_HUMAN	SCYL2	SCY1-like protein 2	1739.96	1218.78	1735.55	1402.39
Q6P4Q7;Q6P4Q7-2	Q6P4Q7;Q6P4Q7-2	CNNM4_HUMAN	CNNM4	Metal transporter CNNM4	1544.04	1491.96	1265.32	1538.13
Q6P587;Q6P587-2;Q6P587-3	Q6P587;Q6P587-2;Q6P587-3	FAHD1_HUMAN	FAHD1	Acylpyruvase FAHD1, mitochondrial	1772.28	3426.93	1573.44	2918.9
Q6P5R6	Q6P5R6	RL22L_HUMAN	RPL22L1	Ribosomal protein eL22-like	4287.32	3059.6	4424.82	3483.88
Q6P996;Q6P996-4;Q6P996-5	Q6P996;Q6P996-3;Q6P996-4;Q6P996-5	PDXD1_HUMAN	PDXDC1	Pyridoxal-dependent decarboxylase domain-containing protein 1	4221.89	3096.75	4025.89	4481.53
Q6P9B6	Q6P9B6	MEAK7_HUMAN	MEAK7	MTOR-associated protein MEAK7	962.724	1415.47	761.353	1221.39
Q6PD74	Q6PD74	AAGAB_HUMAN	AAGAB	Alpha- and gamma-adaptin-binding protein p34		576.081	1204.33	813.263
Q6PGP7	Q6PGP7	SKI3_HUMAN	SKIC3	Superkiller complex protein 3	1439.96	1382.48	1813.44	1565.79
Q6PI48	Q6PI48	SYDM_HUMAN	DARS2	Aspartate--tRNA ligase, mitochondrial	7640.39	7584.61	6492.71	6450.94
Q6PIU2;Q6PIU2-2;Q6PIU2-3	Q6PIU2;Q6PIU2-2;Q6PIU2-3	NCEH1_HUMAN	NCEH1	Neutral cholesterol ester hydrolase 1	1022.76	1064.83	832.617	1098.9
Q6PJG6;Q6PJG6-2	Q6PJG6;Q6PJG6-2	BRAT1_HUMAN	BRAT1	BRCA1-associated ATM activator 1	491.171	467.654	354.622	602.134
Q6PKG0;Q6PKG0-3	Q659C4;Q6PKG0;Q659C4-6;Q659C4-2;Q659C4-5;Q659C4-7;Q6PKG0-3	LARP1_HUMAN	LARP1	La-related protein 1	3946.74	3138.89	4523.78	2888.57
Q6UB35	Q6UB35	C1TM_HUMAN	MTHFD1L	Monofunctional C1-tetrahydrofolate synthase, mitochondrial	3021.04	2242.13	2669.93	3566.75
Q6UW68	Q6UW68	TM205_HUMAN	TMEM205	Transmembrane protein 205	2024.35	2654.41	2094.52	2382.31
Q6UWE0;Q6UWE0-2	Q6UWE0;Q6UWE0-2	LRSM1_HUMAN	LRSAM1	E3 ubiquitin-protein ligase LRSAM1	488.61	781.147	686.498	327.018
Q6UXG2;Q6UXG2-2;Q6UXG2-3;Q6UXG2-4	Q6UXG2;Q6UXG2-3;Q6UXG2-2;Q6UXG2-4	ELAP1_HUMAN	ELAPOR1	Endosome/lysosome-associated apoptosis and autophagy regulator 1	1792.67	1714.87	1981.5	1851.45
Q6UXN9	Q6UXN9	WDR82_HUMAN	WDR82	WD repeat-containing protein 82	2461.07	3095.83	3808.32	3313.2
Q6VY07;Q6VY07-2	Q6VY07;Q6VY07-2	PACS1_HUMAN	PACS1	Phosphofurin acidic cluster sorting protein 1	675.635	339.823	370.875	415.426
Q6YN16;Q6YN16-2	Q6YN16;Q6YN16-2	HSDL2_HUMAN	HSDL2	Hydroxysteroid dehydrogenase-like protein 2	1612.12	1393.11	1259.65	905.166
Q6YP21;Q6YP21-3	Q6YP21;Q6YP21-3	KAT3_HUMAN	KYAT3	Kynurenine--oxoglutarate transaminase 3	1180.11	1695.49	1537.82	1473.97
Q6ZMP0;Q6ZMP0-4	Q6ZMP0;Q6ZMP0-4	THSD4_HUMAN	THSD4	Thrombospondin type-1 domain-containing protein 4		329.929		737.048
Q6ZRS2;Q6ZRS2-2;Q6ZRS2-3	Q6ZRS2;Q6ZRS2-3;Q6ZRS2-2	SRCAP_HUMAN	SRCAP	Helicase SRCAP	5142.68	8374.61	4786.85	7485.26
Q6ZRV2	Q6ZRV2	FA83H_HUMAN	FAM83H	Protein FAM83H	1456.2	814.235	1330.99	1048.47
Q6ZT12;Q6ZT12-4	Q6ZT12;Q6ZT12-4	UBR3_HUMAN	UBR3	E3 ubiquitin-protein ligase UBR3	688.215	524.729	460.059	1574.43
Q6ZXV5;Q6ZXV5-2	Q6ZXV5;Q6ZXV5-2	TMTC3_HUMAN	TMTC3	Protein O-mannosyl-transferase TMTC3	1754.18	1687.53	2263.31	2263.91
Q70CQ2	Q70CQ2;Q70CQ2-2;Q70CQ2-3	UBP34_HUMAN	USP34	Ubiquitin carboxyl-terminal hydrolase 34	15084	15518.6	11961.9	1564.67
Q70CQ3	Q70CQ3	UBP30_HUMAN	USP30	Ubiquitin carboxyl-terminal hydrolase 30	3069.18	3271.48	3160.24
Q70CQ4	Q70CQ4	UBP31_HUMAN	USP31	Ubiquitin carboxyl-terminal hydrolase 31	2463.62	2638.58	2317.27
Q70EL4;Q70EL4-4	Q70EL4;Q70EL4-3;Q70EL4-4	UBP43_HUMAN	USP43	Ubiquitin carboxyl-terminal hydrolase 43	2092.61	2189.03	1433.76
Q71UM5	Q71UM5	RS27L_HUMAN	RPS27L	Ribosomal protein eS27-like	4279.64	4342.33	3818.53	4270.81
Q7KZ85	Q7KZ85	SPT6H_HUMAN	SUPT6H	Transcription elongation factor SPT6	2200.95	2364.12	2028.05
Q7KZF4	Q7KZF4	SND1_HUMAN	SND1	Staphylococcal nuclease domain-containing protein 1	13235.5	12003	12426.7	13799.4
Q7L014	Q7L014	DDX46_HUMAN	DDX46	Probable ATP-dependent RNA helicase DDX46	299.874	729.414	738.376	808.067
Q7L0Y3	Q7L0Y3	TM10C_HUMAN	TRMT10C	tRNA methyltransferase 10 homolog C	2715.34	3778.47	3434.3	4301.2
Q7L1Q6;Q7L1Q6-2;Q7L1Q6-3;Q7L1Q6-4	Q7L1Q6;Q7L1Q6-2;Q7L1Q6-3;Q7L1Q6-4	5MP2_HUMAN	BZW1	eIF5-mimic protein 2	1479.42	1543.73	1118.43	1141.59
Q7L2E3;Q7L2E3-2;Q7L2E3-3	Q7L2E3;Q7L2E3-2;Q7L2E3-3	DHX30_HUMAN	DHX30	ATP-dependent RNA helicase DHX30	2808.98	2053.67	2792.89	2516.39
Q7L2H7	Q7L2H7	EIF3M_HUMAN	EIF3M	Eukaryotic translation initiation factor 3 subunit M	6789.83	5687.63	6571.6	6788.59
Q7L2J0;Q7L2J0-2	Q7L2J0;Q7L2J0-2	MEPCE_HUMAN	MEPCE	7SK snRNA methylphosphate capping enzyme	3937.9	4267.73	3696.54	4318.63
Q7L576	Q7L576	CYFP1_HUMAN	CYFIP1	Cytoplasmic FMR1-interacting protein 1	5998.96	5856.96	5963.04	5643.8
Q7L5D6	Q7L5D6;Q7L5D6-2	GET4_HUMAN	GET4	Golgi to ER traffic protein 4 homolog	7042.2	7330.56	6156.8	7541.94
Q7L5N1	Q7L5N1	CSN6_HUMAN	COPS6	COP9 signalosome complex subunit 6	1069.16	843.669	1393.49	1135.42
Q7L5Y9;Q7L5Y9-2;Q7L5Y9-3	Q7L5Y9;Q7L5Y9-2;Q7L5Y9-3	MAEA_HUMAN	MAEA	E3 ubiquitin-protein transferase MAEA	786.462	761.877	1044.29	530.116
Q7L775	Q7L775	EPMIP_HUMAN	EPM2AIP1	EPM2A-interacting protein 1	971.545	922.064	997.758	1395.36
Q7L9L4;Q7L9L4-2;Q9H8S9	Q7L9L4;Q9H8S9;Q7L9L4-2;Q9H8S9-2	MOB1A_HUMAN;MOB1B_HUMAN	MOB1A;MOB1B	MOB kinase activator 1B	1641.86	1845.72	1416.45	960.132
Q7LBC6	Q7LBC6	KDM3B_HUMAN	KDM3B	Lysine-specific demethylase 3B	1898.5	1673.56	1813.93	2689.77
Q7LG56;Q7LG56-2;Q7LG56-6	Q7LG56;Q7LG56-2;Q7LG56-6	RIR2B_HUMAN	RRM2B	Ribonucleoside-diphosphate reductase subunit M2 B	2886.04	3716.61	2999.6	3142.45
Q7RTS9	Q7RTS9	DYM_HUMAN	DYM	Dymeclin	2262.04	2410.38	1414.84	1529.12
Q7Z2K6	Q7Z2K6	ERMP1_HUMAN	ERMP1	Endoplasmic reticulum metallopeptidase 1	3868.61	2995.06	2908.55	559.534
Q7Z2T5	Q7Z2T5	TRM1L_HUMAN	TRMT1L	TRMT1-like protein	1800.73	1754.75	1568	1529.48
Q7Z2W4	Q7Z2W4;Q7Z2W4-2	ZCCHV_HUMAN	ZC3HAV1	Zinc finger CCCH-type antiviral protein 1	4280.41	4899.94	4392.83	3767.36
Q7Z2Z2;Q7Z2Z2-2	Q7Z2Z2;Q7Z2Z2-2	EFL1_HUMAN	EFL1	Elongation factor-like GTPase 1	1036.42	1392.47	1018.69	609.617
Q7Z3C6;Q7Z3C6-2	Q7Z3C6;Q7Z3C6-2	ATG9A_HUMAN	ATG9A	Autophagy-related protein 9A	1190.08	849.131	1234.96	1095.77
Q7Z3U7;Q7Z3U7-2;Q7Z3U7-5;Q7Z3U7-6	Q7Z3U7;Q7Z3U7-2;Q7Z3U7-3;Q7Z3U7-5;Q7Z3U7-6	MON2_HUMAN	MON2	Protein MON2 homolog	2062.81	2576.97	2575.07	2006.94
Q7Z406;Q7Z406-2;Q7Z406-6	Q7Z406;Q7Z406-2;Q7Z406-4;Q7Z406-5;Q7Z406-6	MYH14_HUMAN	MYH14	Myosin-14	3136.42	3179.45	3524.4	4025.18
Q7Z417	Q7Z417	NUFP2_HUMAN	NUFIP2	FMR1-interacting protein NUFIP2	1272.81	1496.89	925.598	1136.82
Q7Z478	Q7Z478	DHX29_HUMAN	DHX29	ATP-dependent RNA helicase DHX29	3371.69	2494.38	2753.42	2376.32
Q7Z4G4;Q7Z4G4-2;Q7Z4G4-3	Q7Z4G4;Q7Z4G4-2;Q7Z4G4-3	TRM11_HUMAN	TRMT11	tRNA (guanine(10)-N2)-methyltransferase homolog	777.765		239.112	85.4455
Q7Z4W1	Q7Z4W1	DCXR_HUMAN	DCXR	L-xylulose reductase	20778.3	24495.1	22455.8	23850.6
Q7Z6Z7;Q7Z6Z7-2;Q7Z6Z7-3	Q7Z6Z7;Q7Z6Z7-2;Q7Z6Z7-3	HUWE1_HUMAN	HUWE1	E3 ubiquitin-protein ligase HUWE1	11737.7	11170	10229.8	4395.91
Q7Z739	Q7Z739	YTHD3_HUMAN	YTHDF3	YTH domain-containing family protein 3	849.342	563.83	908.795	711.779
Q7Z7A3	Q7Z7A3	CTU1_HUMAN	CTU1	Cytoplasmic tRNA 2-thiolation protein 1	883.845	1030.26	923.28	1425.56
Q7Z7E8	Q7Z7E8	UB2Q1_HUMAN	UBE2Q1	Ubiquitin-conjugating enzyme E2 Q1	1993.04	2794.47	2177.34	2842.14
Q7Z7H5;Q7Z7H5-2;Q7Z7H5-3	Q7Z7H5;Q7Z7H5-2;Q7Z7H5-3	TMED4_HUMAN	TMED4	Transmembrane emp24 domain-containing protein 4	5583.21	4663.78	5137.17	5503.7
Q86SE5;Q86SE5-3	Q86SE5;Q86SE5-3	RALYL_HUMAN	RALYL	RNA-binding Raly-like protein	1335.48	1561.6	1879.6	1838.13
Q86SF2	Q86SF2	GALT7_HUMAN	GALNT7	N-acetylgalactosaminyltransferase 7	535.147	970.38	667.68	907.479
Q86T82;Q86T82-2	Q86T82;Q86T82-2	UBP37_HUMAN	USP37	Ubiquitin carboxyl-terminal hydrolase 37	540.91	337.124	278.553
Q86TI2;Q86TI2-2;Q86TI2-4	Q86TI2;Q86TI2-2;Q86TI2-4	DPP9_HUMAN	DPP9	Dipeptidyl peptidase 9	2930.77	3930.54	3026.28	2753.64
Q86TP1	Q86TP1	PRUN1_HUMAN	PRUNE1	Exopolyphosphatase PRUNE1	3738.86	2531.98	3236.39	3403.29
Q86TU7	Q86TU7	SETD3_HUMAN	SETD3	Actin-histidine N-methyltransferase	3436.48	2705.73	2849.25	3221.05
Q86UE4	Q86UE4	LYRIC_HUMAN	MTDH	Protein LYRIC	1812.17	926.248	1502.47	1530.03
Q86UV5;Q86UV5-8	Q86UV5;Q86UV5-2;Q86UV5-5;Q86UV5-8	UBP48_HUMAN	USP48	Ubiquitin carboxyl-terminal hydrolase 48	8284.41	8371.74	7677.45	1270.69
Q86V21;Q86V21-2	Q86V21;Q86V21-2	AACS_HUMAN	AACS	Acetoacetyl-CoA synthetase	2499.07	2444.28	1958.89	3009.65
Q86V81	Q86V81	THOC4_HUMAN	ALYREF	THO complex subunit 4	327.556	328.014		808.804
Q86VN1	Q86VN1;Q86VN1-2	VPS36_HUMAN	VPS36	Vacuolar protein-sorting-associated protein 36	1709.14	1317.29	1149.95	2127.27
Q86VP6	Q86VP6	CAND1_HUMAN	CAND1	Cullin-associated NEDD8-dissociated protein 1	26897.3	22293.3	29724.6	27820
Q86W34	Q86W34	AMZ2_HUMAN	AMZ2	Archaemetzincin-2	1981.49	1987.96	1968.42	2660.01
Q86W42;Q86W42-2;Q86W42-3	Q86W42;Q86W42-2;Q86W42-3	THOC6_HUMAN	THOC6	THO complex subunit 6 homolog	1563.09	1474.72	1042.45	1592.04
Q86W50	Q86W50	MET16_HUMAN	METTL16	RNA N6-adenosine-methyltransferase METTL16	1154.13	929.545	860.741	1264.82
Q86WA6;Q86WA6-2	Q86WA6;Q86WA6-2	BPHL_HUMAN	BPHL	Valacyclovir hydrolase	938.417	1200.97	1067.39	1277.2
Q86WJ1;Q86WJ1-2;Q86WJ1-4	Q86WJ1;Q86WJ1-2;Q86WJ1-3;Q86WJ1-4	CHD1L_HUMAN	CHD1L	Chromodomain-helicase-DNA-binding protein 1-like	10497.5	11325	9707.02	10565.4
Q86WQ0;Q86WQ0-2	Q86WQ0;Q86WQ0-2	NR2CA_HUMAN	NR2C2AP	Nuclear receptor 2C2-associated protein	2087.07	1700.9	1282.78	2107.73
Q86X29;Q86X29-3;Q86X29-4;Q86X29-5;Q86X29-6	Q86X29;Q86X29-3;Q86X29-4;Q86X29-5;Q86X29-6	LSR_HUMAN	LSR	Lipolysis-stimulated lipoprotein receptor	799.698	1121.52	845.887	1195.48
Q86X55;Q86X55-1	Q86X55;Q86X55-1;Q86X55-2	CARM1_HUMAN	CARM1	Histone-arginine methyltransferase CARM1	8956.63	8700.13	7956.01	8838.37
Q86XP3;Q86XP3-2	Q86XP3;Q86XP3-2	DDX42_HUMAN	DDX42	ATP-dependent RNA helicase DDX42	2460.14	1856.46	1900.82	1691.22
Q86XR7-2;Q9Y3B3;Q9Y3B3-2	Q9Y3B3;Q86XR7-2;Q9Y3B3-2	TCAM2_HUMAN;TMED7_HUMAN	TICAM2;TMED7	Isoform 2 of TIR domain-containing adapter molecule 2	5651.2	5566.33	4865.88	6627.01
Q86Y56	Q86Y56;Q86Y56-2	DAAF5_HUMAN	DNAAF5	Dynein axonemal assembly factor 5	2784.33	1349.32	3108.48	1900.08
Q86YS7;Q86YS7-2;Q86YS7-3;Q86YS7-4;Q86YS7-5	Q86YS7;Q86YS7-2;Q86YS7-3;Q86YS7-4;Q86YS7-5	C2CD5_HUMAN	C2CD5	C2 domain-containing protein 5	1096.38	1362.14	1314.37	1779.57
Q86YV9	Q86YV9	HPS6_HUMAN	HPS6	BLOC-2 complex member HPS6		981.108		1037.77
Q8IUF1;Q9BRT8;Q9BRT8-3;Q9BRT8-4	Q9BRT8;Q8IUF1;Q9BRT8-2;Q9BRT8-3;Q9BRT8-4	ZNG1A_HUMAN;ZNG1B_HUMAN	ZNG1A;ZNG1B	Zinc-regulated GTPase metalloprotein activator 1B	728.92	847.111	1229.07	1142.24
Q8IUF8;Q8IUF8-2;Q8IUF8-4	Q8IUF8;Q8IUF8-2;Q8IUF8-4	RIOX2_HUMAN	RIOX2	Ribosomal oxygenase 2	692.6	548.773	206.917	308.73
Q8IV08	Q8IV08	PLD3_HUMAN	PLD3	5'-3' exonuclease PLD3	8018.47	8808.86	7152.1	7989.99
Q8IV36;Q8IV36-2	Q8IV36;Q8IV36-2;Q8IV36-3	HID1_HUMAN	HID1	Protein HID1	2844.95	1742.37	2539.43	2607.65
Q8IV50	Q8IV50;Q8IV50-2	LYSM2_HUMAN	LYSMD2	LysM and putative peptidoglycan-binding domain-containing protein 2	357.083	616.545	380.343	375.928
Q8IVD9	Q8IVD9	NUDC3_HUMAN	NUDCD3	NudC domain-containing protein 3	489.074			630.135
Q8IWR0	Q8IWR0	Z3H7A_HUMAN	ZC3H7A	Zinc finger CCCH domain-containing protein 7A	915.456	840.172	573.645	576.239
Q8IWS0;Q8IWS0-2;Q8IWS0-3;Q8IWS0-4;Q8IWS0-5	Q8IWS0;Q8IWS0-2;Q8IWS0-3;Q8IWS0-4;Q8IWS0-5	PHF6_HUMAN	PHF6	PHD finger protein 6	1939.99	2242.96	2356.12	1808.05
Q8IWV8;Q8IWV8-4	Q8IWV8;Q8IWV8-4	UBR2_HUMAN	UBR2	E3 ubiquitin-protein ligase UBR2	708.609	805.301	887.174	751.715
Q8IX04;Q8IX04-2;Q8IX04-3;Q8IX04-4;Q8IX04-6;Q8IX04-7	Q8IX04;Q8IX04-2;Q8IX04-3;Q8IX04-4;Q8IX04-6;Q8IX04-7	UEVLD_HUMAN	UEVLD	Ubiquitin-conjugating enzyme E2 variant 3	544.517	603.153	613.23	476.292
Q8IX12;Q8IX12-2	Q8IX12;Q8IX12-2	CCAR1_HUMAN	CCAR1	Cell division cycle and apoptosis regulator protein 1	1019.62	586.118	1226.92	1458.58
Q8IX18;Q8IX18-3	Q8IX18;Q8IX18-2;Q8IX18-3;Q8IX18-4	DHX40_HUMAN	DHX40	Probable ATP-dependent RNA helicase DHX40	1249.36	853.095	425.268	571.206
Q8IXB1	Q8IXB1	DJC10_HUMAN	DNAJC10	DnaJ homolog subfamily C member 10	1647.08	1445.26	1633.99	885.706
Q8IXH7;Q8IXH7-4	Q8IXH7;Q8IXH7-4	NELFD_HUMAN	NELFCD	Negative elongation factor C/D				274.775
Q8IXI1	Q8IXI1	MIRO2_HUMAN	RHOT2	Mitochondrial Rho GTPase 2	1377.03	1281.17	922.09	1629.98
Q8IXM3	Q8IXM3	RM41_HUMAN	MRPL41	Large ribosomal subunit protein mL41	1425.5	909.26	974.542	1344.99
Q8IY67;Q8IY67-2	Q8IY67;Q8IY67-2	RAVR1_HUMAN	RAVER1	Ribonucleoprotein PTB-binding 1	2455.06	1921.82	2467.53	2284.52
Q8IYB5;Q8IYB5-2;Q8IYB5-3	Q8IYB5;Q8IYB5-2;Q8IYB5-3	SMAP1_HUMAN	SMAP1	Stromal membrane-associated protein 1	3863.18	2250.99	2694.32	3006.06
Q8IYB8	Q8IYB8	SUV3_HUMAN	SUPV3L1	ATP-dependent RNA helicase SUPV3L1, mitochondrial	2208.67	1619.05	1572.86	1517.33
Q8IYD1	Q8IYD1	ERF3B_HUMAN	GSPT2	Eukaryotic peptide chain release factor GTP-binding subunit ERF3B	1315.48		1307.46
Q8IYQ7	Q8IYQ7	THNS1_HUMAN	THNSL1	Threonine synthase-like 1	1461.62	1683.39	1227.86	1667.2
Q8IZH2;Q8IZH2-2	Q8IZH2;Q8IZH2-2	XRN1_HUMAN	XRN1	5'-3' exoribonuclease 1	821.96	863.3	832.159	480.1
Q8N122	Q8N122;Q8N122-3	RPTOR_HUMAN	RPTOR	Regulatory-associated protein of mTOR	1102.31	1294.47	1329.17	1115.47
Q8N163	Q8N163;Q8N163-2	CCAR2_HUMAN	CCAR2	Cell cycle and apoptosis regulator protein 2	11135.7	11652.3	12141.7	10870.2
Q8N1B4;Q8N1B4-2	Q8N1B4;Q8N1B4-2	VPS52_HUMAN	VPS52	Vacuolar protein sorting-associated protein 52 homolog	1506.88	892.497	1479.8
Q8N1F7	Q8N1F7;Q8N1F7-2	NUP93_HUMAN	NUP93	Nuclear pore complex protein Nup93	1808.91	1442.94	2325.62	1627.1
Q8N1G2	Q8N1G2	CMTR1_HUMAN	CMTR1	Cap-specific mRNA (nucleoside-2'-O-)-methyltransferase 1	7697.05	7988.24	6596.25	6233.21
Q8N1G4	Q8N1G4	LRC47_HUMAN	LRRC47	Leucine-rich repeat-containing protein 47	6231.75	6799.37	6772.82	5845.17
Q8N2N9;Q8N2N9-2;Q8N2N9-3	Q8N2N9;Q8N2N9-4;A6QL64;A6QL64-4;A6QL64-5;Q8N2N9-2;Q8N2N9-3	AN36B_HUMAN	ANKRD36B	Ankyrin repeat domain-containing protein 36B	752.962		470.831	771.499
Q8N335	Q8N335	GPD1L_HUMAN	GPD1L	Glycerol-3-phosphate dehydrogenase 1-like protein	1453.92	1051.86	918.865	808.529
Q8N3C0	Q8N3C0	ASCC3_HUMAN	ASCC3	Activating signal cointegrator 1 complex subunit 3	2142.66	1872.85	2342.24	2102.06
Q8N465	Q8N465	D2HDH_HUMAN	D2HGDH	D-2-hydroxyglutarate dehydrogenase, mitochondrial	1365.13	1316.64	1028.09	920.754
Q8N4C8;Q8N4C8-2;Q8N4C8-3;Q8N4C8-4;Q8N4C8-5	O95819;Q8N4C8;Q9UKE5;O95819-2;O95819-3;O95819-4;O95819-5;O95819-6;Q8N4C8-2;Q8N4C8-3;Q8N4C8-4;Q8N4C8-5;Q9UKE5-2;Q9UKE5-3;Q9UKE5-4;Q9UKE5-5;Q9UKE5-6;Q9UKE5-7;Q9UKE5-8	MINK1_HUMAN	MINK1	Misshapen-like kinase 1	504.979	1096.88	879.469	963.645
Q8N4Q0	Q8N4Q0;Q8N4Q0-2	PTGR3_HUMAN	PTGR3	Prostaglandin reductase 3	2294.15	1667.97	1479.48	2511.01
Q8N4T8;Q8N4T8-2	Q8N4T8;Q8N4T8-2	CBR4_HUMAN	CBR4	3-oxoacyl-[acyl-carrier-protein] reductase	1583.89	717.43	1155.5	1089.62
Q8N5C7;Q8N5C7-2	Q8N5C7;Q8N5C7-2	DTWD1_HUMAN	DTWD1	tRNA-uridine aminocarboxypropyltransferase 1	1501.66	1600.02	1464.34	2098.73
Q8N684;Q8N684-2;Q8N684-3	Q8N684;Q8N684-3;Q8N684-2	CPSF7_HUMAN	CPSF7	Cleavage and polyadenylation specificity factor subunit 7	2624.83	2917.18	1764.87	1933.57
Q8N6H7;Q8N6H7-2	Q8N6H7;Q8N6H7-2	ARFG2_HUMAN	ARFGAP2	ADP-ribosylation factor GTPase-activating protein 2	3041.29	2606	2958.7	3128.58
Q8N6L1;Q8N6L1-2	Q8N6L1;Q8N6L1-2	KTAP2_HUMAN	KRTCAP2	Keratinocyte-associated protein 2	704.138	959.552	840.207	1043.15
Q8N6M0	Q8N6M0	OTU6B_HUMAN	OTUD6B	Deubiquitinase OTUD6B	30735	30419.5	25115.7	907.559
Q8N6R0;Q8N6R0-1	Q8N6R0;Q8N6R0-1;Q8N6R0-4	EFNMT_HUMAN	METTL13	eEF1A lysine and N-terminal methyltransferase	2274.08	1384.83	1264	1219.35
Q8N6T3;Q8N6T3-2;Q8N6T3-3;Q8N6T3-5	Q8N6T3;Q8N6T3-3;Q8N6T3-2;Q8N6T3-4;Q8N6T3-5	ARFG1_HUMAN	ARFGAP1	ADP-ribosylation factor GTPase-activating protein 1	3088	1698.59	1469.14	2011.67
Q8N766;Q8N766-2;Q8N766-3;Q8N766-4	Q8N766;Q8N766-2;Q8N766-3;Q8N766-4	EMC1_HUMAN	EMC1	ER membrane protein complex subunit 1	1804.4	1575.23	1680.61	1223.11
Q8N7H5;Q8N7H5-2;Q8N7H5-3	Q8N7H5;Q8N7H5-2;Q8N7H5-3	PAF1_HUMAN	PAF1	RNA polymerase II-associated factor 1 homolog	2056.41	2037.87	1511.82	2541.33
Q8N806	Q8N806	UBR7_HUMAN	UBR7	Putative E3 ubiquitin-protein ligase UBR7		1667.13	873.707	649.862
Q8N8N7	Q8N8N7;Q8N8N7-2	PTGR2_HUMAN	PTGR2	Prostaglandin reductase 2	890.806	1015.5	1324.13	1416.81
Q8N945;Q8N945-3	Q8N945;Q8N945-3	PRLD2_HUMAN	PRELID2	PRELI domain-containing protein 2	104.461	790.006	1185.68
Q8N983;Q8N983-2;Q8N983-3;Q8N983-4;Q8N983-6;Q8N983-7	Q8N983;Q8N983-3;Q8N983-2;Q8N983-4;Q8N983-6;Q8N983-7	RM43_HUMAN	MRPL43	Large ribosomal subunit protein mL43			794.441
Q8N9N2-2	Q8N9N2-2	ASCC1_HUMAN	ASCC1	Isoform 2 of Activating signal cointegrator 1 complex subunit 1		525.225	307.008	424.583
Q8NB14	Q8NB14;Q8NB14-2	UBP38_HUMAN	USP38	Ubiquitin carboxyl-terminal hydrolase 38	17231.1	15932.4	13851.9	1587.86
Q8NB16	Q8NB16	MLKL_HUMAN	MLKL	Mixed lineage kinase domain-like protein	547.491	382.165	580.311	641.753
Q8NB46	Q8NB46	ANR52_HUMAN	ANKRD52	Serine/threonine-protein phosphatase 6 regulatory ankyrin repeat subunit C	1672.37	1583.93	2034.77	1604.79
Q8NBF2	Q8NBF2;Q8NBF2-2	NHLC2_HUMAN	NHLRC2	NHL repeat-containing protein 2	2327.11	2268.77	3014.56	2727.69
Q8NBF6;Q8NBF6-2	Q8NBF6;Q8NBF6-2	AVL9_HUMAN	AVL9	Late secretory pathway protein AVL9 homolog	1339.48	1205.62	1723.22	1328.89
Q8NBJ5	Q8NBJ5	GT251_HUMAN	COLGALT1	Procollagen galactosyltransferase 1	5275.9	4819.53	4252.51	4184.06
Q8NBM4;Q8NBM4-2;Q8NBM4-3;Q8NBM4-4	Q8NBM4;Q8NBM4-4;Q8NBM4-2;Q8NBM4-3	UBAC2_HUMAN	UBAC2	Ubiquitin-associated domain-containing protein 2			597.986
Q8NBM8	Q8NBM8	PCYXL_HUMAN	PCYOX1L	Prenylcysteine oxidase-like	451.536	206.571		437.832
Q8NBS9;Q8NBS9-2	Q8NBS9;Q8NBS9-2	TXND5_HUMAN	TXNDC5	Thioredoxin domain-containing protein 5	3498.96	3350.27	4303.1	4450.41
Q8NCL4	Q8NCL4	GALT6_HUMAN	GALNT6	Polypeptide N-acetylgalactosaminyltransferase 6	1143.49	1302.51	1144.97	951.85
Q8NCN5	Q8NCN5	PDPR_HUMAN	PDPR	Pyruvate dehydrogenase phosphatase regulatory subunit, mitochondrial	2401.41	2364.15	2482.41	2531.8
Q8NCW5;Q8NCW5-2	Q8NCW5;Q8NCW5-2	NNRE_HUMAN	NAXE	NAD(P)H-hydrate epimerase	2206.02	2783.07	2422.84	2092.96
Q8ND04;Q8ND04-2	Q8ND04;Q8ND04-2	SMG8_HUMAN	SMG8	Nonsense-mediated mRNA decay factor SMG8	520.859	321.701	394.458	340.445
Q8NDH3;Q8NDH3-2;Q8NDH3-4;Q8NDH3-5	Q8NDH3;Q8NDH3-5;Q8NDH3-2;Q8NDH3-3;Q8NDH3-4	PEPL1_HUMAN	NPEPL1	Probable aminopeptidase NPEPL1	2154.68	1725.43	1692.92	1999.37
Q8NE01;Q8NE01-2;Q8NE01-3	Q8NE01;Q8NE01-3;Q8NE01-2	CNNM3_HUMAN	CNNM3	Metal transporter CNNM3	548.339	598.426	574.143	629.552
Q8NE71;Q8NE71-2	Q8NE71;Q8NE71-2	ABCF1_HUMAN	ABCF1	ATP-binding cassette sub-family F member 1	11034.3	12747	12986.3	10982.9
Q8NEB9	Q8NEB9	PK3C3_HUMAN	PIK3C3	Phosphatidylinositol 3-kinase catalytic subunit type 3	1834.82	1045.97	1728.9	1096.47
Q8NEW0	Q8NEW0	ZNT7_HUMAN	SLC30A7	Zinc transporter 7	2749.38		1630.21	2130.14
Q8NEZ5	Q8NEZ5;Q8NEZ5-3	FBX22_HUMAN	FBXO22	F-box only protein 22	7635.88	7640.21	7451.76	7015.1
Q8NF37	Q8NF37	PCAT1_HUMAN	LPCAT1	Lysophosphatidylcholine acyltransferase 1	1435.55	1139.73	1723.31	1173.13
Q8NFA0	Q8NFA0	UBP32_HUMAN	USP32	Ubiquitin carboxyl-terminal hydrolase 32	71837.2	72243.3	59276.4	4912.67
Q8NFF5;Q8NFF5-2;Q8NFF5-3	Q8NFF5;Q8NFF5-2;Q8NFF5-3	FAD1_HUMAN	FLAD1	FAD synthase	1401.58	1638.47	1155.2	1211.53
Q8NFH3	Q8NFH3	NUP43_HUMAN	NUP43	Nucleoporin Nup43	791.359	838.663	331.918	811.888
Q8NFH4	Q8NFH4	NUP37_HUMAN	NUP37	Nucleoporin Nup37			281.965
Q8NFQ8	Q8NFQ8	TOIP2_HUMAN	TOR1AIP2	Torsin-1A-interacting protein 2	1868.41	1614.71	1563.26	1016.23
Q8NFV4;Q8NFV4-4	Q8NFV4;Q8NFV4-4;Q8NFV4-6	ABHDB_HUMAN	ABHD11	Protein ABHD11	459.63	1638.31	1220.99	1416.57
Q8NFW8	Q8NFW8	NEUA_HUMAN	CMAS	N-acylneuraminate cytidylyltransferase	1601.54	1194.94	1003.48	1180.46
Q8NHP8;Q8NHP8-2	Q8NHP8;Q8NHP8-2	PLBL2_HUMAN	PLBD2	Putative phospholipase B-like 2	1162.92	1125.84	1363.53	1364.75
Q8NHU6;Q8NHU6-2	Q8NHU6;Q8NHU6-2	TDRD7_HUMAN	TDRD7	Tudor domain-containing protein 7		2220.16	1976.06	2549.25
Q8NI36	Q8NI36	WDR36_HUMAN	WDR36	WD repeat-containing protein 36	1043.13	366.916	436.693	1044.25
Q8TAA9;Q8TAA9-2	Q8TAA9;Q8TAA9-2	VANG1_HUMAN	VANGL1	Vang-like protein 1	804.258	459.298	893.827	465.308
Q8TAC2;Q8TAC2-2	Q8TAC2;Q8TAC2-2	JOS2_HUMAN	JOSD2	Josephin-2	1795.71	859.128	1278.13
Q8TAF3;Q8TAF3-3	Q8TAF3;Q8TAF3-3;Q8TAF3-4;Q8TAF3-5	WDR48_HUMAN	WDR48	WD repeat-containing protein 48	2357.76	2178.95	2474.15	1165.45
Q8TAT6;Q8TAT6-2	Q8TAT6;Q8TAT6-2	NPL4_HUMAN	NPLOC4	Nuclear protein localization protein 4 homolog	4368.89	4381.46	4237.94	4131.72
Q8TB61;Q8TB61-2;Q8TB61-3	Q8TB61;Q8TB61-2;Q8TB61-3;Q8TB61-4;Q8TB61-5	S35B2_HUMAN	SLC35B2	Adenosine 3'-phospho 5'-phosphosulfate transporter 1	7566.81	7288.81	7010.66	6749.26
Q8TBB5;Q8TBB5-3	Q8TBB5;Q8TBB5-3	KLDC4_HUMAN	KLHDC4	Kelch domain-containing protein 4	1692.23	2191.51	2403.77	1480.75
Q8TBC3	Q8TBC3	SHKB1_HUMAN	SHKBP1	SH3KBP1-binding protein 1	1383.36	801.724	521.364	1267.59
Q8TBC4;Q8TBC4-2	Q8TBC4;Q8TBC4-2	UBA3_HUMAN	UBA3	NEDD8-activating enzyme E1 catalytic subunit				244.838
Q8TC07;Q8TC07-2;Q8TC07-3	Q8TC07;Q8TC07-2;Q8TC07-3	TBC15_HUMAN	TBC1D15	TBC1 domain family member 15	2180.87	1926.87	1880.48	1888.41
Q8TC12	Q8TC12;Q8TC12-3	RDH11_HUMAN	RDH11	Retinol dehydrogenase 11	1678.89	2260.61	2053.63	2274.24
Q8TCJ2	Q8TCJ2	STT3B_HUMAN	STT3B	Dolichyl-diphosphooligosaccharide--protein glycosyltransferase subunit STT3B	5123.9	4458.77	5622	4281.95
Q8TCS8	Q8TCS8	PNPT1_HUMAN	PNPT1	Polyribonucleotide nucleotidyltransferase 1, mitochondrial	4049.34	4902.34	4332.68	4346.25
Q8TCT8	Q8TCT8	SPP2A_HUMAN	SPPL2A	Signal peptide peptidase-like 2A	946.16	674.546		802.866
Q8TCT9;Q8TCT9-2;Q8TCT9-4;Q8TCT9-5	Q8TCT9;Q8TCT9-2;Q8TCT9-4;Q8TCT9-5	HM13_HUMAN	HM13	Minor histocompatibility antigen H13	2648.68	2435.43	2090.76	2356.1
Q8TCU6	Q8TCU6;Q8TCU6-2;Q8TCU6-3	PREX1_HUMAN	PREX1	Phosphatidylinositol 3,4,5-trisphosphate-dependent Rac exchanger 1 protein	4322.39	3918.31	4415.62	4339.77
Q8TD55;Q8TD55-2	Q8TD55;Q8TD55-2	PKHO2_HUMAN	PLEKHO2	Pleckstrin homology domain-containing family O member 2	7724.07	7989.7	6865.29
Q8TDJ6;Q8TDJ6-3	Q8TDJ6;Q8TDJ6-3	DMXL2_HUMAN	DMXL2	DmX-like protein 2		375.018	245.65
Q8TE77;Q8TE77-3	Q8TE77;Q8TE77-2;Q8TE77-3	SSH3_HUMAN	SSH3	Protein phosphatase Slingshot homolog 3	3425.83	2701.14	2746.91	3212.45
Q8TEA8	Q8TEA8	DTD1_HUMAN	DTD1	D-aminoacyl-tRNA deacylase 1	1134.54	2330.39	1129.12	1560.91
Q8TEM1	Q8TEM1;Q8TEM1-2	PO210_HUMAN	NUP210	Nuclear pore membrane glycoprotein 210	2019.03	2185.56	2231.82	2338.27
Q8TEQ6	Q8TEQ6	GEMI5_HUMAN	GEMIN5	Gem-associated protein 5	2757.26	3687.52	3436.98	3320.88
Q8TEW0;Q8TEW0-10;Q8TEW0-11;Q8TEW0-2;Q8TEW0-3;Q8TEW0-4;Q8TEW0-5;Q8TEW0-6;Q8TEW0-7;Q8TEW0-8;Q8TEW0-9	Q8TEW0;Q8TEW0-10;Q8TEW0-11;Q8TEW0-2;Q8TEW0-3;Q8TEW0-4;Q8TEW0-5;Q8TEW0-6;Q8TEW0-7;Q8TEW0-8;Q8TEW0-9	PARD3_HUMAN	PARD3	Partitioning defective 3 homolog	1020.08	870.81	1126.91	595.69
Q8TEX9;Q8TEX9-2	Q8TEX9;Q8TEX9-2	IPO4_HUMAN	IPO4	Importin-4	5759.14	4141.08	5205.86	5076.46
Q8TEY7;Q8TEY7-2;Q8TEY7-3	Q8TEY7;Q8TEY7-2;Q8TEY7-3	UBP33_HUMAN	USP33	Ubiquitin carboxyl-terminal hydrolase 33	1026.37	1252.97	975.218	687.122
Q8WTV0;Q8WTV0-2;Q8WTV0-3;Q8WTV0-4;Q8WTV0-5	Q8WTV0;Q8WTV0-2;Q8WTV0-3;Q8WTV0-4;Q8WTV0-5	SCRB1_HUMAN	SCARB1	Scavenger receptor class B member 1	2994.81	2369.8	2842.12	2726.72
Q8WTW3	Q8WTW3	COG1_HUMAN	COG1	Conserved oligomeric Golgi complex subunit 1	976.788	835.883	1056.4	772.445
Q8WU10;Q8WU10-2	Q8WU10;Q8WU10-2	PYRD1_HUMAN	PYROXD1	Pyridine nucleotide-disulfide oxidoreductase domain-containing protein 1	586.7		612.858
Q8WU90	Q8WU90	ZC3HF_HUMAN	ZC3H15	Zinc finger CCCH domain-containing protein 15	1711.41	1289.82	2055.4	1032.04
Q8WUD1	Q8WUD1;Q8WUD1-2	RAB2B_HUMAN	RAB2B	Ras-related protein Rab-2B		943.482	433.081	344.533
Q8WUD6;Q8WUD6-2	Q8WUD6;Q8WUD6-2	CHPT1_HUMAN	CHPT1	Cholinephosphotransferase 1	2165.13
Q8WUH2	Q8WUH2	TGFA1_HUMAN	TGFBRAP1	Transforming growth factor-beta receptor-associated protein 1	4041.61	2810.94	3167.77	3574.35
Q8WUM4;Q8WUM4-2	Q8WUM4;Q8WUM4-2;Q8WUM4-3	PDC6I_HUMAN	PDCD6IP	Programmed cell death 6-interacting protein	6331.88	6049.08	7067.6	6264.39
Q8WUY1	Q8WUY1	THEM6_HUMAN	THEM6	Protein THEM6	6472.24	5653.69	6252.22	9660.42
Q8WVJ2	Q8WVJ2	NUDC2_HUMAN	NUDCD2	NudC domain-containing protein 2	1743.99		2205.45	2792.6
Q8WVM8;Q8WVM8-2;Q8WVM8-3	Q8WVM8;Q8WVM8-2;Q8WVM8-3	SCFD1_HUMAN	SCFD1	Sec1 family domain-containing protein 1	1925.57	786.181	736.729	1074.8
Q8WVV9;Q8WVV9-4;Q8WVV9-5	Q8WVV9;Q8WVV9-3;Q8WVV9-2;Q8WVV9-4;Q8WVV9-5	HNRLL_HUMAN	HNRNPLL	Heterogeneous nuclear ribonucleoprotein L-like	2026.78	1506.19	1086.68	1606.22
Q8WVX9	Q8WVX9	FACR1_HUMAN	FAR1	Fatty acyl-CoA reductase 1	3303.67	2879.29	2714.88	3137.62
Q8WVY7	Q8WVY7	UBCP1_HUMAN	UBLCP1	Ubiquitin-like domain-containing CTD phosphatase 1	1762.03	1638.56	2631.05	1946.19
Q8WVZ9	Q8WVZ9	KBTB7_HUMAN	KBTBD7	Kelch repeat and BTB domain-containing protein 7	537.574	310.739	593.975	630.64
Q8WW12;Q8WW12-2	Q8WW12;Q8WW12-2	PCNP_HUMAN	PCNP	PEST proteolytic signal-containing nuclear protein	2499.06	2872.84	3401.36	3926.87
Q8WW59	Q8WW59	SPRY4_HUMAN	SPRYD4	SPRY domain-containing protein 4	4622.79	5378.45	4326.07	5137.07
Q8WWC4	Q8WWC4	MAIP1_HUMAN	MAIP1	m-AAA protease-interacting protein 1, mitochondrial	960.814	1561.23	1157.31	1448.68
Q8WWY3	Q8WWY3	PRP31_HUMAN	PRPF31	U4/U6 small nuclear ribonucleoprotein Prp31	3071.77	2450.68	4609.91	2471.6
Q8WWZ7-3	Q8WWZ7-3	ABCA5_HUMAN	ABCA5	Isoform 3 of Cholesterol transporter ABCA5		1305.5	874.43	858.709
Q8WX92;Q8WX92-2	Q8WX92;Q8WX92-2	NELFB_HUMAN	NELFB	Negative elongation factor B		356.908	516.334	339.623
Q8WXF1;Q8WXF1-2	Q8WXF1;Q8WXF1-2	PSPC1_HUMAN	PSPC1	Paraspeckle component 1	4851.54	4593.81	5765.37	4996.55
Q8WXG6-2;Q8WXG6-3;Q8WXG6-4;Q8WXG6-5;Q8WXG6-6;Q8WXG6-8	Q8WXG6-2;Q8WXG6-3;Q8WXG6-4;Q8WXG6-5;Q8WXG6-6;Q8WXG6-8	MADD_HUMAN	MADD	Isoform 2 of MAP kinase-activating death domain protein	1215.62	766.478	889.342	829.337
Q8WY54	Q8WY54	PPM1E_HUMAN	PPM1E	Protein phosphatase 1E	3065.54	2760.05	3492.61	2455.78
Q92499	Q92499;Q92499-2	DDX1_HUMAN	DDX1	ATP-dependent RNA helicase DDX1	7099.27	8948.9	7819.8	8180.4
Q92508	Q92508	PIEZ1_HUMAN	PIEZO1	Piezo-type mechanosensitive ion channel component 1	563.16		408.22
Q92522	Q92522	H1X_HUMAN	H1-10	Histone H1.10	267.697	439.303	425.08	355.878
Q92530	Q92530	PSMF1_HUMAN	PSMF1	Proteasome inhibitor PI31 subunit	1345.23	951.216	874.651	1103.82
Q92541	Q92541	RTF1_HUMAN	RTF1	RNA polymerase-associated protein RTF1 homolog	909.525	1641.66	1542.51	989.05
Q92544	Q92544	TM9S4_HUMAN	TM9SF4	Transmembrane 9 superfamily member 4	3688.77	3818.59	4650.28	4098.34
Q92552;Q92552-2	Q92552;Q92552-2	RT27_HUMAN	MRPS27	Small ribosomal subunit protein mS27	2041.63	1366.45	2037.82	2044.46
Q92560	Q92560	BAP1_HUMAN	BAP1	Ubiquitin carboxyl-terminal hydrolase BAP1	4210.4	4081.93	3384.72
Q92597;Q92597-2;Q92597-3	Q92597;Q92597-2;Q92597-3	NDRG1_HUMAN	NDRG1	Protein NDRG1	334.493	328.813	223.053	789.542
Q92598;Q92598-2;Q92598-3	Q92598;Q92598-2;Q92598-3;Q92598-4	HS105_HUMAN	HSPH1	Heat shock protein 105 kDa	17845.1	19613.3	19003.1	19209.4
Q92616	Q92616	GCN1_HUMAN	GCN1	Stalled ribosome sensor GCN1	10388.4	8936.13	10399.2	9699.98
Q92620	Q92620	PRP16_HUMAN	DHX38	Pre-mRNA-splicing factor ATP-dependent RNA helicase PRP16	2156.86	1158.69	1818.38	1846.82
Q92621	Q92621	NU205_HUMAN	NUP205	Nuclear pore complex protein Nup205	1433.14	1142.51	1170.16	1018.14
Q92643	Q92643	GPI8_HUMAN	PIGK	GPI-anchor transamidase	2453.35	1837.54	1963.22	1739.15
Q92685;Q92685-2	Q92685;Q92685-2	ALG3_HUMAN	ALG3	Dol-P-Man:Man(5)GlcNAc(2)-PP-Dol alpha-1,3-mannosyltransferase	541.869	275.938	679.511	490.23
Q92688;Q92688-2	P39687;Q92688;Q92688-2	AN32B_HUMAN	ANP32B	Acidic leucine-rich nuclear phosphoprotein 32 family member B	1822.3	1616.78	1966.61	2465.46
Q92696	Q92696	PGTA_HUMAN	RABGGTA	Geranylgeranyl transferase type-2 subunit alpha	3414.66	2506.9	3479.82	2950.79
Q92747	Q92747	ARC1A_HUMAN	ARPC1A	Actin-related protein 2/3 complex subunit 1A	5648.16	5038.12	5095.47	4800.52
Q92759	Q92759	TF2H4_HUMAN	GTF2H4	General transcription factor IIH subunit 4				174.291
Q92769;Q92769-3	Q92769;Q92769-3	HDAC2_HUMAN	HDAC2	Histone deacetylase 2	28827	26887.3	30100.3	29265
Q92804;Q92804-2	Q92804;Q92804-2	RBP56_HUMAN	TAF15	TATA-binding protein-associated factor 2N				376.199
Q92820	Q92820	GGH_HUMAN	GGH	Gamma-glutamyl hydrolase	218.905	97.2841	250.689	158.035
Q92841;Q92841-1;Q92841-2;Q92841-3	Q92841;Q92841-1;Q92841-2;Q92841-3	DDX17_HUMAN	DDX17	Probable ATP-dependent RNA helicase DDX17	4234.96	3571.73	4365.66	3895.58
Q92878;Q92878-2;Q92878-3	Q92878;Q92878-2;Q92878-3	RAD50_HUMAN	RAD50	DNA repair protein RAD50	3824.65	4381.05	4298.29	3743.22
Q92879;Q92879-2;Q92879-3;Q92879-4;Q92879-5;Q92879-6	O95319;Q92879;O95319-2;O95319-3;O95319-4;O95319-5;Q92879-2;Q92879-3;Q92879-4;Q92879-5;Q92879-6	CELF1_HUMAN	CELF1	CUGBP Elav-like family member 1	2015.31	1974.63	2045	1899.43
Q92888;Q92888-2;Q92888-3;Q92888-4	Q92888;Q92888-2;Q92888-3;Q92888-4	ARHG1_HUMAN	ARHGEF1	Rho guanine nucleotide exchange factor 1	1384.79	1639.94	1434.86	1591.37
Q92890;Q92890-1	Q92890;Q92890-1;Q92890-3	UFD1_HUMAN	UFD1	Ubiquitin recognition factor in ER-associated degradation protein 1	2383.58	2527.69	2408.8	1946
Q92896;Q92896-2;Q92896-3	Q92896;Q92896-2;Q92896-3	GSLG1_HUMAN	GLG1	Golgi apparatus protein 1	2689.78	1477.03	2059.81	1875.14
Q92900;Q92900-2	Q92900;Q92900-2	RENT1_HUMAN	UPF1	Regulator of nonsense transcripts 1	8258.53	7765.13	8296.05	8425.69
Q92905	Q92905	CSN5_HUMAN	COPS5	COP9 signalosome complex subunit 5	859.249	903.649	872.568	1097.91
Q92930	Q92930	RAB8B_HUMAN	RAB8B	Ras-related protein Rab-8B		924.867	858.206	822.54
Q92945	Q92945	FUBP2_HUMAN	KHSRP	Far upstream element-binding protein 2	1533.56	850.774	1820.6	1795.33
Q92947	Q92947;Q92947-2	GCDH_HUMAN	GCDH	Glutaryl-CoA dehydrogenase, mitochondrial	4538.57	4093.93	4373.58	4754.71
Q92973;Q92973-2	Q92973;Q92973-2	TNPO1_HUMAN	TNPO1	Transportin-1	2058.9	956.802	1486.3	1876.21
Q92979	Q92979	NEP1_HUMAN	EMG1	Ribosomal RNA small subunit methyltransferase NEP1	6211.56	4961.95	5004	4286.45
Q92989	Q92989	CLP1_HUMAN	CLP1	Polyribonucleotide 5'-hydroxyl-kinase Clp1	1637.64	2903.05	2130.31	1744.01
Q92990;Q92990-2	Q92990;Q92990-2	GLMN_HUMAN	GLMN	Glomulin	526.346		394.585	542.022
Q92995;Q92995-2	Q92995;Q92995-2	UBP13_HUMAN	USP13	Ubiquitin carboxyl-terminal hydrolase 13	2150.13	1265.52	1514.61	1188.25
Q93008;Q93008-3	O00507;Q93008;O00507-2;Q93008-3	USP9X_HUMAN	USP9X	Probable ubiquitin carboxyl-terminal hydrolase FAF-X	52555.1	51756.4	41251.9	3575.79
Q93009;Q93009-3	Q93009;Q93009-3	UBP7_HUMAN	USP7	Ubiquitin carboxyl-terminal hydrolase 7	157732	157015	134043	10056.3
Q93050;Q93050-1;Q93050-3	Q93050;Q93050-1;Q93050-3	VPP1_HUMAN	ATP6V0A1	V-type proton ATPase 116 kDa subunit a 1	1486.54	1731.26	1876.56	1513.73
Q93074;Q93074-2;Q93074-3	Q93074;Q93074-2;Q93074-3	MED12_HUMAN	MED12	Mediator of RNA polymerase II transcription subunit 12		146.408	277.921	282.242
Q93084;Q93084-1;Q93084-3;Q93084-4;Q93084-5;Q93084-6;Q93084-7	Q93084;Q93084-1;Q93084-3;Q93084-4;Q93084-5;Q93084-6;Q93084-7	AT2A3_HUMAN	ATP2A3	Sarcoplasmic/endoplasmic reticulum calcium ATPase 3	1193.4	956.578	796.226	953.444
Q93100;Q93100-2;Q93100-3;Q93100-4	Q93100;Q93100-4;Q93100-2;Q93100-3	KPBB_HUMAN	PHKB	Phosphorylase b kinase regulatory subunit beta	2150.02	1495.14	1548.13	2837.52
Q969E2;Q969E2-2	Q969E2;Q969E2-2	SCAM4_HUMAN	SCAMP4	Secretory carrier-associated membrane protein 4	2261.02	1825.82	1992.24	2069.69
Q969F9;Q969F9-2	Q969F9;Q969F9-2	HPS3_HUMAN	HPS3	BLOC-2 complex member HPS3	1007.42	1153.17	557.382	911.806
Q969H8	Q969H8	MYDGF_HUMAN	MYDGF	Myeloid-derived growth factor	10704.8	13118.4	10862.1	9419.14
Q969L2	Q969L2	MAL2_HUMAN	MAL2	Protein MAL2	1955.37	1667.27	2296.85	1867.88
Q969M3;Q969M3-3	Q969M3;Q969M3-2;Q969M3-3	YIPF5_HUMAN	YIPF5	Protein YIPF5	1789.53	1773.95	1154.56	1320.93
Q969N2;Q969N2-2;Q969N2-4;Q969N2-5	Q969N2;Q969N2-2;Q969N2-3;Q969N2-4;Q969N2-5;Q969N2-6	PIGT_HUMAN	PIGT	GPI transamidase component PIG-T	1510.45	1862.86	2180.6	1728.06
Q969Q0	P83881;Q969Q0	RL36L_HUMAN	RPL36AL	Ribosomal protein eL42-like	10519	6924.52	7487.48	6675.18
Q969U7;Q969U7-2	Q969U7;Q969U7-2	PSMG2_HUMAN	PSMG2	Proteasome assembly chaperone 2	4321.07	3546.01	3717.63	4638.51
Q969V3;Q969V3-2	Q969V3;Q969V3-2	NCLN_HUMAN	NCLN	BOS complex subunit NCLN	1758.18	1666.17	1710.63	1097.23
Q969X5;Q969X5-2	Q969X5;Q969X5-2	ERGI1_HUMAN	ERGIC1	Endoplasmic reticulum-Golgi intermediate compartment protein 1	2477.69	3612.42	2385.29	2615.58
Q969Z0	Q969Z0;Q969Z0-2	FAKD4_HUMAN	TBRG4	FAST kinase domain-containing protein 4	3377.64	2944.53	2236.6	1934.97
Q96A33;Q96A33-2	Q96A33;Q96A33-2	CCD47_HUMAN	CCDC47	PAT complex subunit CCDC47	1724.75	1625.15	1814.41	1355.05
Q96A35	Q96A35	RM24_HUMAN	MRPL24	Large ribosomal subunit protein uL24m	1643.5	1680.95	2416.3	2205.43
Q96AC1;Q96AC1-2;Q96AC1-3	Q96AC1;Q9BQL6;Q96AC1-2;Q96AC1-3;Q9BQL6-2;Q9BQL6-4	FERM2_HUMAN	FERMT2	Fermitin family homolog 2	1583.7	1008.51	1010.72	1184.25
Q96AE4;Q96AE4-2	Q96AE4;Q96AE4-2	FUBP1_HUMAN	FUBP1	Far upstream element-binding protein 1	1111.22	1500.64	2081	3315.77
Q96AG4	Q96AG4	LRC59_HUMAN	LRRC59	Leucine-rich repeat-containing protein 59	1495.64	594.647	1450.44	961.501
Q96AH0;Q96AH0-2;Q96AH0-3;Q9BQ15	Q96AH0;Q9BQ15;Q96AH0-2;Q96AH0-3	SOSB1_HUMAN;SOSB2_HUMAN	NABP1;NABP2	SOSS complex subunit B2	1997.59	1796.81	2100.86	1392.75
Q96AY3	Q96AY3	FKB10_HUMAN	FKBP10	Peptidyl-prolyl cis-trans isomerase FKBP10	475.348	368.327	683.778	466.756
Q96B26	Q96B26	EXOS8_HUMAN	EXOSC8	Exosome complex component RRP43	3695.68	3615.1	2757.46	3396.94
Q96BI1	Q96BI1	S22AI_HUMAN	SLC22A18	Solute carrier family 22 member 18	880.194	1282.47	1029.19	510.266
Q96BJ3	Q96BJ3;Q96BJ3-3	AIDA_HUMAN	AIDA	Axin interactor, dorsalization-associated protein	1154.71		1106.35	1874.02
Q96BM9	Q96BM9	ARL8A_HUMAN	ARL8A	ADP-ribosylation factor-like protein 8A	4870.6	4151.47	4496.93	4097.78
Q96BP3	Q96BP3	PPWD1_HUMAN	PPWD1	Peptidylprolyl isomerase domain and WD repeat-containing protein 1	1667.94	1943.6	1943.92	1417.34
Q96BW9;Q96BW9-2;Q96BW9-3	Q96BW9;Q96BW9-2;Q96BW9-3	TAM41_HUMAN	TAMM41	Phosphatidate cytidylyltransferase, mitochondrial	662.692	242.294	680.751	437.667
Q96BY7	Q96BY7	ATG2B_HUMAN	ATG2B	Autophagy-related protein 2 homolog B	955.235	879.219	960.836	665.45
Q96C86	Q96C86	DCPS_HUMAN	DCPS	m7GpppX diphosphatase	1613.3	1388.82	1500.86	1597.36
Q96CN7	Q96CN7	ISOC1_HUMAN	ISOC1	Isochorismatase domain-containing protein 1	23137.2	23970.8	22500.4	24009.8
Q96CS3	Q96CS3	FAF2_HUMAN	FAF2	FAS-associated factor 2	1286.68	1430.1	1414.14	1282.17
Q96CW1;Q96CW1-2	Q96CW1;Q96CW1-2	AP2M1_HUMAN	AP2M1	AP-2 complex subunit mu	9626.89	9821.37	9055.13	9307.18
Q96CW5;Q96CW5-2	Q96CW5;Q96CW5-2	GCP3_HUMAN	TUBGCP3	Gamma-tubulin complex component 3	759.704	749.649	782.514	851.844
Q96D46	Q96D46	NMD3_HUMAN	NMD3	60S ribosomal export protein NMD3	4266.56	3290.87	3217.44	3303.46
Q96DB5;Q96DB5-2	Q96DB5;Q96DB5-2	RMD1_HUMAN	RMDN1	Regulator of microtubule dynamics protein 1	1831.91		1360.06	1402.57
Q96DC9	Q96DC9	OTUB2_HUMAN	OTUB2	Ubiquitin thioesterase OTUB2	1794.7	2593.42	1311.11
Q96DI7;Q96DI7-2	Q96DI7;Q96DI7-2	SNR40_HUMAN	SNRNP40	U5 small nuclear ribonucleoprotein 40 kDa protein	4148.96	4949.5	3236.65	2751.48
Q96DM3	Q96DM3	RMC1_HUMAN	RMC1	Regulator of MON1-CCZ1 complex	1304.8	1101.21	1378.99	1348.4
Q96DZ1;Q96DZ1-2;Q96DZ1-3	Q96DZ1;Q96DZ1-2;Q96DZ1-3	ERLEC_HUMAN	ERLEC1	Endoplasmic reticulum lectin 1	919.821	1271.62	1635.54	776.193
Q96EE3;Q96EE3-1	Q96EE3;Q96EE3-1	SEH1_HUMAN	SEH1L	Nucleoporin SEH1	2246.2	2175.34	2278.71	2237.35
Q96EK6	Q96EK6	GNA1_HUMAN	GNPNAT1	Glucosamine 6-phosphate N-acetyltransferase	1903.39	1863.54	2124.61	1527.85
Q96EY1;Q96EY1-2	Q96EY1;Q96EY1-2;Q96EY1-3	DNJA3_HUMAN	DNAJA3	DnaJ homolog subfamily A member 3, mitochondrial	4306.94	5360.22	4714.97	4304.61
Q96F07;Q96F07-2	Q96F07;Q96F07-2	CYFP2_HUMAN	CYFIP2	Cytoplasmic FMR1-interacting protein 2	130.472			321.024
Q96F81	Q96F81	DISP1_HUMAN	DISP1	Protein dispatched homolog 1	538.393
Q96FW1	Q96FW1;Q96FW1-2	OTUB1_HUMAN	OTUB1	Ubiquitin thioesterase OTUB1	122360	154312	111049	10264.9
Q96FX7	Q96FX7	TRM61_HUMAN	TRMT61A	tRNA (adenine(58)-N(1))-methyltransferase catalytic subunit TRMT61A	1164.75	1950.5	1399.19	2171.74
Q96FZ2	Q96FZ2	HMCES_HUMAN	HMCES	Abasic site processing protein HMCES	1927.51	1717.02	2203.48	2198.53
Q96G03	Q96G03	PGM2_HUMAN	PGM2	Phosphopentomutase	6950.69	10250.3	7274.58	9777.27
Q96GA7	Q96GA7	SDSL_HUMAN	SDSL	Serine dehydratase-like	329.443	734.855	1101.51	515.017
Q96GC5;Q96GC5-3	Q96GC5;Q96GC5-3	RM48_HUMAN	MRPL48	Large ribosomal subunit protein mL48	1252.42	1533.93	1376.28	1434.68
Q96GK7	Q96GK7	FAH2A_HUMAN	FAHD2A	Fumarylacetoacetate hydrolase domain-containing protein 2A		1047.11	531.034	657.003
Q96HE7	Q86YB8;Q96HE7	ERO1A_HUMAN	ERO1A	ERO1-like protein alpha	1628.64	1110.46	1570.72	1689.11
Q96HS1	Q96HS1	PGAM5_HUMAN	PGAM5	Serine/threonine-protein phosphatase PGAM5, mitochondrial	7292.34	6027.78	6825.9	7015.79
Q96HY7	Q96HY7	DHTK1_HUMAN	DHTKD1	2-oxoadipate dehydrogenase complex component E1	3576.97	2940.83	2921.93	3610.91
Q96I25	Q96I25	SPF45_HUMAN	RBM17	Splicing factor 45	1471		1670.66	1659.18
Q96I59	Q96I59;Q96I59-2	SYNM_HUMAN	NARS2	Probable asparagine--tRNA ligase, mitochondrial	1649.26	2416.8	1331.2	1872.72
Q96I99	Q96I99;Q96I99-2	SUCB2_HUMAN	SUCLG2	Succinate--CoA ligase [GDP-forming] subunit beta, mitochondrial	2022.06	2097.82	2419.42	1981.66
Q96IJ6;Q96IJ6-2	Q96IJ6;Q96IJ6-2	GMPPA_HUMAN	GMPPA	Mannose-1-phosphate guanyltransferase alpha	4366.86	3300.6	4572.01	3569.42
Q96IR7	Q96IR7	HPDL_HUMAN	HPDL	4-hydroxyphenylpyruvate dioxygenase-like protein	6160.17	6063.58	5270.35	11204.3
Q96IU4	Q96IU4	ABHEB_HUMAN	ABHD14B	Putative protein-lysine deacylase ABHD14B	440.965	696.247	740.639	867.338
Q96J01;Q96J01-2	Q96J01;Q96J01-2	THOC3_HUMAN	THOC3	THO complex subunit 3	2898.96	4046.59	2677.37	5125.13
Q96JH7	Q96JH7	VCIP1_HUMAN	VCPIP1	Deubiquitinating protein VCPIP1	14832.6	13233.3	11714.7	1691.62
Q96K37	Q96K37	S35E1_HUMAN	SLC35E1	Solute carrier family 35 member E1	461.408
Q96K76-4	Q96K76;Q96K76-2;Q96K76-4	UBP47_HUMAN	USP47	Isoform 4 of Ubiquitin carboxyl-terminal hydrolase 47	27967	30007.8	24430.8	2132.38
Q96KB5;Q96KB5-2	Q96KB5;Q96KB5-2	TOPK_HUMAN	PBK	Lymphokine-activated killer T-cell-originated protein kinase	4551.17	4438.95	3892.9	2844.44
Q96KG9;Q96KG9-2;Q96KG9-3;Q96KG9-4;Q96KG9-5;Q96KG9-6	Q96KG9;Q96KG9-4;Q96KG9-2;Q96KG9-3;Q96KG9-5;Q96KG9-6	SCYL1_HUMAN	SCYL1	N-terminal kinase-like protein	2421.83	2381.62	2482.25	2174.36
Q96KP1	Q96KP1	EXOC2_HUMAN	EXOC2	Exocyst complex component 2	696.409	514.451	1035.78	706.831
Q96KP4	Q96KP4;Q96KP4-2	CNDP2_HUMAN	CNDP2	Cytosolic non-specific dipeptidase	5067.09	6625.5	6383.27	7402.89
Q96L92;Q96L92-3	Q96L92;Q96L92-2;Q96L92-3	SNX27_HUMAN	SNX27	Sorting nexin-27	6691.73	6009.13	6257.94	6072.7
Q96LA8;Q96LA8-2	Q96LA8;Q96LA8-2	ANM6_HUMAN	PRMT6	Protein arginine N-methyltransferase 6	3590.19	4622.56	4208.41	4995.12
Q96LI5;Q9ULM6	Q96LI5;Q9ULM6	CNO6L_HUMAN;CNOT6_HUMAN	CNOT6;CNOT6L	CCR4-NOT transcription complex subunit 6-like	3759.13	2358.03	2772.49	2051.67
Q96M27;Q96M27-2;Q96M27-3;Q96M27-4;Q96M27-5	Q96M27;Q96M27-2;Q96M27-3;Q96M27-4;Q96M27-5	PRRC1_HUMAN	PRRC1	Protein PRRC1	941.919	853.085	1594.66	810.424
Q96MI9	Q96MI9	CBPC4_HUMAN	AGBL1	Cytosolic carboxypeptidase 4				424.436
Q96MX6;Q96MX6-2	Q96MX6;Q96MX6-2	DAA10_HUMAN	DNAAF10	Dynein axonemal assembly factor 10	879.35	1736.14	1765.59	956.907
Q96N66;Q96N66-3	Q96N66;Q96N66-3	MBOA7_HUMAN	MBOAT7	Lysophospholipid acyltransferase 7	2589.44	3189.83	2728.79	2657.67
Q96NE9;Q96NE9-2	Q96NE9;Q96NE9-2	FRMD6_HUMAN	FRMD6	FERM domain-containing protein 6	5493.76	9976	6476.89	12392.2
Q96P11;Q96P11-2;Q96P11-4	Q96P11;Q96P11-2;Q96P11-4	NSUN5_HUMAN	NSUN5	28S rRNA (cytosine-C(5))-methyltransferase	556.087	1271.64	664.206	462.693
Q96P47;Q96P47-2;Q96P47-4	Q96P47;Q9UPQ3;Q96P47-2;Q96P47-3;Q96P47-4;Q96P47-6;Q9UPQ3-2;Q9UPQ3-3	AGAP3_HUMAN	AGAP3	Arf-GAP with GTPase, ANK repeat and PH domain-containing protein 3	675.798	766.999	754.991	469.568
Q96P48;Q96P48-1;Q96P48-2;Q96P48-3;Q96P48-4;Q96P48-5;Q96P48-7	Q96P48;Q96P48-1;Q96P48-2;Q96P48-3;Q96P48-4;Q96P48-5;Q96P48-7	ARAP1_HUMAN	ARAP1	Arf-GAP with Rho-GAP domain, ANK repeat and PH domain-containing protein 1	1927.95	1747.43	1637.92	1017.8
Q96P70	Q96P70	IPO9_HUMAN	IPO9	Importin-9	2178.29	1873.26	2603.96	1874.6
Q96PK6	Q96PK6;Q96PK6-2;Q96PK6-3;Q96PK6-4;Q96PK6-5	RBM14_HUMAN	RBM14	RNA-binding protein 14	2390.32	2132.17	2661.64	2446.93
Q96PZ0;Q96PZ0-2	Q96PZ0;Q96PZ0-2	PUS7_HUMAN	PUS7	Pseudouridylate synthase 7 homolog	5981.82	6126.98	6421.8	6149.06
Q96Q05;Q96Q05-2;Q96Q05-3	Q96Q05;Q96Q05-2;Q96Q05-3	TPPC9_HUMAN	TRAPPC9	Trafficking protein particle complex subunit 9	533.116	326.473	732.076	1017.24
Q96Q11;Q96Q11-2	Q96Q11;Q96Q11-2	TRNT1_HUMAN	TRNT1	CCA tRNA nucleotidyltransferase 1, mitochondrial	3884.59	4655.44	4175.54	4252.12
Q96QK1	Q96QK1	VPS35_HUMAN	VPS35	Vacuolar protein sorting-associated protein 35	5472.46	2894.96	3898.82	3848.7
Q96QP1;Q96QP1-2	Q96QP1;Q96QP1-2	ALPK1_HUMAN	ALPK1	Alpha-protein kinase 1	1395.3	1750.3	1449.85	1486.18
Q96QR8	Q96QR8	PURB_HUMAN	PURB	Transcriptional activator protein Pur-beta	2515.88	2286.25	2426.26	2110.31
Q96RE7	Q96RE7	NACC1_HUMAN	NACC1	Nucleus accumbens-associated protein 1	3261.58	3406.17	3468.76	4572.93
Q96RL7;Q96RL7-2;Q96RL7-3;Q96RL7-4	Q96RL7;Q96RL7-2;Q96RL7-3;Q96RL7-4	VP13A_HUMAN	VPS13A	Intermembrane lipid transfer protein VPS13A	269.448	148.284
Q96RP9	Q96RP9;Q96RP9-2	EFGM_HUMAN	GFM1	Elongation factor G, mitochondrial	6558.53	5388.85	5844.45	5447.19
Q96RQ1	Q96RQ1	ERGI2_HUMAN	ERGIC2	Endoplasmic reticulum-Golgi intermediate compartment protein 2	1845.21	2134.57	2184.56	2182
Q96RQ3	Q96RQ3	MCCA_HUMAN	MCCC1	Methylcrotonoyl-CoA carboxylase subunit alpha, mitochondrial	2683.35	2520.24	2304.11	2678.45
Q96RS6;Q96RS6-2;Q96RS6-3	Q96RS6;Q96RS6-2;Q96RS6-3	NUDC1_HUMAN	NUDCD1	NudC domain-containing protein 1	13896.5	15142.8	14517.9	16206.9
Q96RU2-2	Q96RU2;Q96RU2-2	UBP28_HUMAN	USP28	Isoform 2 of Ubiquitin carboxyl-terminal hydrolase 28	7665.12	8253.56	6306.81	708.996
Q96S52;Q96S52-2	Q96S52;Q96S52-2	PIGS_HUMAN	PIGS	GPI transamidase component PIG-S		457.361	345.854	405.254
Q96S55;Q96S55-2	Q96S55;Q96S55-2;Q96S55-3;Q96S55-4	WRIP1_HUMAN	WRNIP1	ATPase WRNIP1	9578.22	8599.92	9389.85	6874.61
Q96S59	Q96S59;Q96S59-2;Q96S59-3	RANB9_HUMAN	RANBP9	Ran-binding protein 9	1546.92	1779.85	1425.44	1193.76
Q96SB4;Q96SB4-3;Q96SB4-4	Q96SB4;Q96SB4-3;Q96SB4-4	SRPK1_HUMAN	SRPK1	SRSF protein kinase 1	979.807	927.234	982.527	726.298
Q96SI9;Q96SI9-2	Q96SI9;Q96SI9-2	STRBP_HUMAN	STRBP	Spermatid perinuclear RNA-binding protein	3482.89	2793.91		2068.35
Q96SU4;Q96SU4-2;Q96SU4-3;Q96SU4-4;Q96SU4-5;Q96SU4-6;Q96SU4-7	Q96SU4;Q96SU4-2;Q96SU4-3;Q96SU4-4;Q96SU4-5;Q96SU4-6;Q96SU4-7	OSBL9_HUMAN	OSBPL9	Oxysterol-binding protein-related protein 9	4389.4	3557.65	4185.7	4013.24
Q96SW2;Q96SW2-2	Q96SW2;Q96SW2-2	CRBN_HUMAN	CRBN	Protein cereblon	2157.68	1802.94	2932.67	2175.04
Q96SY0;Q96SY0-3;Q96SY0-4	Q96SY0;Q96SY0-3;Q96SY0-4	INT14_HUMAN	INTS14	Integrator complex subunit 14		182.964	611.739	513.651
Q96T51;Q96T51-2	Q96T51;Q96T51-2;Q96T51-3	RUFY1_HUMAN	RUFY1	RUN and FYVE domain-containing protein 1	1938.31	1703.99	1654.48	1620.94
Q96TA1;Q96TA1-2	Q96TA1;Q96TA1-2	NIBA2_HUMAN	NIBAN2	Protein Niban 2	1915.36	1111.98	2326.85	1662.85
Q99426;Q99426-2	Q99426;Q99426-2	TBCB_HUMAN	TBCB	Tubulin-folding cofactor B	1120.95	724.389	1280.89	1393.4
Q99439;Q99439-2	Q99439;Q99439-2	CNN2_HUMAN	CNN2	Calponin-2	1266.27		1419.22	1104.54
Q99447;Q99447-2;Q99447-3;Q99447-4	Q99447;Q99447-2;Q99447-3;Q99447-4	PCY2_HUMAN	PCYT2	Ethanolamine-phosphate cytidylyltransferase	4332.8	5866.03	5222.02	3789.77
Q99459	Q99459	CDC5L_HUMAN	CDC5L	Cell division cycle 5-like protein	265188	250101	288483	234039
Q99460;Q99460-2	Q99460;Q99460-2	PSMD1_HUMAN	PSMD1	26S proteasome non-ATPase regulatory subunit 1	11911	11693.5	10975.4	12192.4
Q99497	Q99497	PARK7_HUMAN	PARK7	Parkinson disease protein 7	7823.61	7510.14	8166.02	9389.54
Q99523	Q99523;Q99523-2	SORT_HUMAN	SORT1	Sortilin	1092.97	540.119	715.984	801.005
Q99536	Q99536;Q99536-2;Q99536-3	VAT1_HUMAN	VAT1	Synaptic vesicle membrane protein VAT-1 homolog	2108.51	2735.68	2594.38	2273.29
Q99543;Q99543-2	Q99543;Q99543-2	DNJC2_HUMAN	DNAJC2	DnaJ homolog subfamily C member 2	2334.85	1977.44	2393.82	1930.01
Q99567	Q99567	NUP88_HUMAN	NUP88	Nuclear pore complex protein Nup88	4245.16	5248.66	4012.91	5407.21
Q99570	Q99570	PI3R4_HUMAN	PIK3R4	Phosphoinositide 3-kinase regulatory subunit 4	1196.03	1110.16	1123.92	570.275
Q99575	Q99575	POP1_HUMAN	POP1	Ribonucleases P/MRP protein subunit POP1	1540.89	2908.16	1777.32	1622.33
Q99623	Q99623;Q99623-2	PHB2_HUMAN	PHB2	Prohibitin-2	22910.5	22490.6	22017.8	23383.5
Q99714;Q99714-2	Q99714;Q99714-2	HCD2_HUMAN	HSD17B10	3-hydroxyacyl-CoA dehydrogenase type-2	6442.19	6695.32	5076.24	5670.64
Q99729-2;Q99729-3	Q99729-2;Q99729-3	ROAA_HUMAN	HNRNPAB	Isoform 2 of Heterogeneous nuclear ribonucleoprotein A/B	4966.2	4815.8	5783.08	6373.12
Q99735;Q99735-2	Q99735;Q99735-2	MGST2_HUMAN	MGST2	Microsomal glutathione S-transferase 2	7252.59	8160.49	7137.35	7050.74
Q99755;Q99755-2;Q99755-3;Q99755-4	Q99755;A2A3N6;Q99755-2;Q99755-3;Q99755-4	PI51A_HUMAN	PIP5K1A	Phosphatidylinositol 4-phosphate 5-kinase type-1 alpha	2190.13	1541.77	1848.32	1301.32
Q99797	Q99797	MIPEP_HUMAN	MIPEP	Mitochondrial intermediate peptidase	1435.7	1392.48	1527.08	1365.13
Q99798	Q99798	ACON_HUMAN	ACO2	Aconitate hydratase, mitochondrial	6604.87	7666.93	7289.27	6821.18
Q99805	Q99805	TM9S2_HUMAN	TM9SF2	Transmembrane 9 superfamily member 2	3712.84	2832.83	2175.1	7533.56
Q99808;Q99808-2	Q99808;Q99808-2	S29A1_HUMAN	SLC29A1	Equilibrative nucleoside transporter 1	4154.91	4673.68	4457.44	3337.98
Q99816	Q99816	TS101_HUMAN	TSG101	Tumor susceptibility gene 101 protein	899.631	624.064	1200.29	895.529
Q99829	Q99829	CPNE1_HUMAN	CPNE1	Copine-1	5616.7	5701.88	5263.93	6054.5
Q99832	Q99832;Q99832-2;Q99832-3;Q99832-4	TCPH_HUMAN	CCT7	T-complex protein 1 subunit eta	28767.8	26306.4	27609.5	25773.7
Q99873;Q99873-2;Q99873-3	Q99873;Q99873-3;Q99873-2	ANM1_HUMAN	PRMT1	Protein arginine N-methyltransferase 1	42689.8	53815	45087.5	43131.9
Q99985	Q99985	SEM3C_HUMAN	SEMA3C	Semaphorin-3C	4439.61	3179.26	3911.24	3763.2
Q9BPW8	Q9BPW8	NIPS1_HUMAN	NIPSNAP1	Protein NipSnap homolog 1	6468.97	6315.5	7420.97	7385.36
Q9BPX3	Q9BPX3	CND3_HUMAN	NCAPG	Condensin complex subunit 3	1944.47	2081.36	2372.38	2091.05
Q9BQ52;Q9BQ52-4	Q9BQ52;Q9BQ52-3;Q9BQ52-4	RNZ2_HUMAN	ELAC2	Zinc phosphodiesterase ELAC protein 2	1414.6	2367.65	1951.36	1730.11
Q9BQ67	Q9BQ67	GRWD1_HUMAN	GRWD1	Glutamate-rich WD repeat-containing protein 1	3774.71	3227.41	3585.84	3152.88
Q9BQ69	Q9BQ69	MACD1_HUMAN	MACROD1	ADP-ribose glycohydrolase MACROD1	1795.68	1685.69	2356.42	2293.22
Q9BQA1	Q9BQA1	MEP50_HUMAN	WDR77	Methylosome protein WDR77	8359.52	10261.2	7573.52	8387.35
Q9BQB6;Q9BQB6-2;Q9BQB6-3	Q9BQB6;Q9BQB6-2;Q9BQB6-3	VKOR1_HUMAN	VKORC1	Vitamin K epoxide reductase complex subunit 1	1992.26	2079.46	1885.81	2243.85
Q9BQE3	A6NHL2;P68363;P68366;Q71U36;Q9BQE3;P68363-2;P68366-2;Q71U36-2;A6NHL2-2	TBA1C_HUMAN	TUBA1C	Tubulin alpha-1C chain	134413	131756	130044	148314
Q9BQG0;Q9BQG0-2	Q9BQG0;Q9BQG0-2	MBB1A_HUMAN	MYBBP1A	Myb-binding protein 1A		456.951	489.694	762.141
Q9BQP7	Q9BQP7	MGME1_HUMAN	MGME1	Mitochondrial genome maintenance exonuclease 1			326.765	506.637
Q9BR76	Q9BR76	COR1B_HUMAN	CORO1B	Coronin-1B	23510.7	22950.3	19953.1	19992.3
Q9BRA2	Q9BRA2	TXD17_HUMAN	TXNDC17	Thioredoxin domain-containing protein 17		1457.46		2705.01
Q9BRJ6	Q9BRJ6	CG050_HUMAN	C7orf50	Uncharacterized protein C7orf50	1033.73	598.602	1872.67	1462.93
Q9BRJ7	Q9BRJ7;Q9BRJ7-2	TIRR_HUMAN	NUDT16L1	Tudor-interacting repair regulator protein	1288.73	1290.9	873.468	980.566
Q9BRP4	Q9BRP4;Q9BRP4-2;Q9BRP4-3	PAAF1_HUMAN	PAAF1	Proteasomal ATPase-associated factor 1	3934.24	4285.91	3680.94	3959.26
Q9BRQ8;Q9BRQ8-2	Q9BRQ8;Q9BRQ8-2	FSP1_HUMAN	AIFM2	Ferroptosis suppressor protein 1	3367.45	4271.65	2703.66	3902.07
Q9BRR6;Q9BRR6-2	Q9BRR6;Q9BRR6-2;Q9BRR6-5	ADPGK_HUMAN	ADPGK	ADP-dependent glucokinase	2487.13	1600.3	2439.2	1567.72
Q9BRX2	Q9BRX2	PELO_HUMAN	PELO	Protein pelota homolog	2830.47	2600.92	2718.81	1985.37
Q9BRX8;Q9BRX8-2	Q9BRX8;Q9BRX8-2	PXL2A_HUMAN	PRXL2A	Peroxiredoxin-like 2A	1674.93	1578.79	1458.02	1699.94
Q9BRX9	Q9BRX9	WDR83_HUMAN	WDR83	WD repeat domain-containing protein 83	1063.27	955.501	563.107	591.699
Q9BRZ2	Q9BRZ2;Q9BRZ2-2	TRI56_HUMAN	TRIM56	E3 ubiquitin-protein ligase TRIM56				701.37
Q9BS26	Q9BS26	ERP44_HUMAN	ERP44	Endoplasmic reticulum resident protein 44	6204.21	5351.64	6426.67	5279.14
Q9BS40	Q9BS40	LXN_HUMAN	LXN	Latexin	6013.06	6525.89	5549.48	5634.01
Q9BSB4	Q9BSB4	ATGA1_HUMAN	ATG101	Autophagy-related protein 101			4802.6	9996.19
Q9BSD7	Q9BSD7	NTPCR_HUMAN	NTPCR	Cancer-related nucleoside-triphosphatase	1044.14	1022.16	1255.89	1259.81
Q9BSF4	Q9BSF4	TIM29_HUMAN	TIMM29	Mitochondrial import inner membrane translocase subunit Tim29	1146.33	1166.35	1299.28	1530.07
Q9BSH4	Q9BSH4	TACO1_HUMAN	TACO1	Translational activator of cytochrome c oxidase 1	3560.22	2693.71	2914	2681.49
Q9BSJ2;Q9BSJ2-3;Q9BSJ2-4	Q9BSJ2;Q9BSJ2-3;Q9BSJ2-4	GCP2_HUMAN	TUBGCP2	Gamma-tubulin complex component 2	1711.32	1308.23	1547.14	1173.2
Q9BSJ8;Q9BSJ8-2	Q9BSJ8;Q9BSJ8-2	ESYT1_HUMAN	ESYT1	Extended synaptotagmin-1	3867.53	3404.29	3416.68	3864.29
Q9BST9	Q9BST9	RTKN_HUMAN	RTKN	Rhotekin	743.061	1156.27	808	1091.43
Q9BSV6	Q9BSV6	SEN34_HUMAN	TSEN34	tRNA-splicing endonuclease subunit Sen34	16602.9	7100.37	19227.3	8724.44
Q9BT22	Q9BT22	ALG1_HUMAN	ALG1	Chitobiosyldiphosphodolichol beta-mannosyltransferase	1165.8	1274.12	1056.98	903.172
Q9BT40;Q9BT40-2	Q9BT40;Q9BT40-2	INP5K_HUMAN	INPP5K	Inositol polyphosphate 5-phosphatase K	1844.97	1450.68	1167.78	1482.22
Q9BT73	Q9BT73	PSMG3_HUMAN	PSMG3	Proteasome assembly chaperone 3	1383.55	1396.05	1257.61	1470.68
Q9BT78	Q9BT78;Q9BT78-2	CSN4_HUMAN	COPS4	COP9 signalosome complex subunit 4	1515.26	834.004	1612.5	1736.7
Q9BTE3;Q9BTE3-2;Q9BTE3-3	Q9BTE3;Q9BTE3-2;Q9BTE3-3	MCMBP_HUMAN	MCMBP	Mini-chromosome maintenance complex-binding protein	2553.74	1991.32	2264.73	2265.44
Q9BTE6;Q9BTE6-2;Q9BTE6-3	Q9BTE6;Q9BTE6-2;Q9BTE6-3	AASD1_HUMAN	AARSD1	Alanyl-tRNA editing protein Aarsd1	1493.22	1419.39	1310.8	1344.24
Q9BTT0;Q9BTT0-3	Q9BTT0;Q9BTT0-3	AN32E_HUMAN	ANP32E	Acidic leucine-rich nuclear phosphoprotein 32 family member E	390.907	527.269	170.904	549.636
Q9BTV4	Q9BTV4	TMM43_HUMAN	TMEM43	Transmembrane protein 43	1862.21	2144.55	1596.28	2140.37
Q9BTW9;Q9BTW9-4	Q9BTW9;Q9BTW9-4;Q9BTW9-5	TBCD_HUMAN	TBCD	Tubulin-specific chaperone D	3686.07	2697.11	3622.09	2189.51
Q9BU76;Q9BU76-3;Q9BU76-4	Q9BU76;Q9BU76-3;Q9BU76-4	MMTA2_HUMAN	MMTAG2	Multiple myeloma tumor-associated protein 2	5441.02	7979.47	5431.69	7644.93
Q9BUB7	Q9BUB7;Q9BUB7-3	TMM70_HUMAN	TMEM70	Transmembrane protein 70, mitochondrial	4880.52	4180.64	2943.07	4779.85
Q9BUF5	Q13509;Q9BUF5;Q13509-2	TBB6_HUMAN	TUBB6	Tubulin beta-6 chain	13372.4	12199.1	12742.6	13421.1
Q9BUJ2;Q9BUJ2-2;Q9BUJ2-3;Q9BUJ2-4	Q9BUJ2;Q9BUJ2-2;Q9BUJ2-3;Q9BUJ2-4	HNRL1_HUMAN	HNRNPUL1	Heterogeneous nuclear ribonucleoprotein U-like protein 1	9588.93	10172.9	8746.92	9741.85
Q9BUN8;Q9BUN8-2	Q9BUN8;Q9BUN8-2	DERL1_HUMAN	DERL1	Derlin-1	8733.13	11197	11060.7	7078.83
Q9BUQ8	Q9BUQ8	DDX23_HUMAN	DDX23	Probable ATP-dependent RNA helicase DDX23	1030.16	2129.95	1286.64	1633.95
Q9BUT1;Q9BUT1-3	Q9BUT1;Q9BUT1-3	DHRS6_HUMAN	BDH2	Dehydrogenase/reductase SDR family member 6	600.925	936.118	986.497	1390.35
Q9BV20;Q9BV20-2	Q9BV20;Q9BV20-2	MTNA_HUMAN	MRI1	Methylthioribose-1-phosphate isomerase	2407.3	2497.89	2679.28	2155.27
Q9BV38	Q9BV38	WDR18_HUMAN	WDR18	WD repeat-containing protein 18	2431.65	2903.82	2621.25	2346.14
Q9BV44	Q9BV44	THUM3_HUMAN	THUMPD3	tRNA (guanine(6)-N2)-methyltransferase THUMP3	3072.49	2618.77	3072.99	3630.19
Q9BV57;Q9BV57-2	Q9BV57;Q9BV57-2	MTND_HUMAN	ADI1	Acireductone dioxygenase	1142.66	1158.6	1597.91	1096.69
Q9BVA1	Q13885;Q9BVA1	TBB2B_HUMAN	TUBB2B	Tubulin beta-2B chain	1823.07	1724.43	1834.07	1237.81
Q9BVC4;Q9BVC4-4;Q9BVC4-5	Q9BVC4;Q9BVC4-4;Q9BVC4-5	LST8_HUMAN	MLST8	Target of rapamycin complex subunit LST8	871.384	1274.66	776.855	937.24
Q9BVJ7	Q9BVJ7	DUS23_HUMAN	DUSP23	Dual specificity protein phosphatase 23	1384.66	1177.56		909.163
Q9BVK6	Q9BVK6	TMED9_HUMAN	TMED9	Transmembrane emp24 domain-containing protein 9	14589	15638.1	13981	17398.2
Q9BVM2	Q9BVM2	DPCD_HUMAN	DPCD	Protein DPCD	3088.54	2097.28	2249.74	1751.36
Q9BVP2;Q9BVP2-2	Q9BVP2;Q9BVP2-2	GNL3_HUMAN	GNL3	Guanine nucleotide-binding protein-like 3	1746.68	1468.33	1545.98	1938.07
Q9BVV7	Q9BVV7	TIM21_HUMAN	TIMM21	Mitochondrial import inner membrane translocase subunit Tim21	1475.51	1340.38	1630.38	1502.76
Q9BW19	Q9BW19	KIFC1_HUMAN	KIFC1	Kinesin-like protein KIFC1	2205.92	1774.61	1972.15	2013.95
Q9BW92	Q9BW92	SYTM_HUMAN	TARS2	Threonine--tRNA ligase, mitochondrial	3500.15	4070.42	3626.61	3785.26
Q9BWD1;Q9BWD1-2	Q9BWD1;Q9BWD1-2	THIC_HUMAN	ACAT2	Acetyl-CoA acetyltransferase, cytosolic	2709.8	3973.47	2412.59	3051.04
Q9BWS9;Q9BWS9-2;Q9BWS9-3	Q9BWS9;Q9BWS9-2;Q9BWS9-3	CHID1_HUMAN	CHID1	Chitinase domain-containing protein 1	426.783	217.838	369.164	386.806
Q9BWU0	Q9BWU0	NADAP_HUMAN	SLC4A1AP	Kanadaptin	2078.97	2387.97	2239.42	2292.93
Q9BX63;Q9BX63-2	Q9BX63;Q9BX63-2	FANCJ_HUMAN	BRIP1	Fanconi anemia group J protein	503.67	673.252	678.401	406.785
Q9BX68	Q9BX68	HINT2_HUMAN	HINT2	Adenosine 5'-monophosphoramidase HINT2		363.041	559.576	816.858
Q9BXB4	Q9BXB4;Q9BXB5;Q9BXB5-2	OSB11_HUMAN	OSBPL11	Oxysterol-binding protein-related protein 11	1196.28	576.417	710.775
Q9BXJ9	Q9BXJ9;Q9BXJ9-4	NAA15_HUMAN	NAA15	N-alpha-acetyltransferase 15, NatA auxiliary subunit	2889.68	2347.99	3294.76	2339.46
Q9BXP5;Q9BXP5-2;Q9BXP5-3;Q9BXP5-4;Q9BXP5-5	Q9BXP5;Q9BXP5-2;Q9BXP5-3;Q9BXP5-4;Q9BXP5-5	SRRT_HUMAN	SRRT	Serrate RNA effector molecule homolog	773.257		1178.56	173.979
Q9BXS5;Q9BXS5-2	Q9BXS5;Q9BXS5-2	AP1M1_HUMAN	AP1M1	AP-1 complex subunit mu-1	2043.8	2209.25	1640.43	1860.95
Q9BXW7;Q9BXW7-2	Q9BXW7;Q9BXW7-2	HDHD5_HUMAN	HDHD5	Haloacid dehalogenase-like hydrolase domain-containing 5	2419.42	2758.2	3205.83	3120.3
Q9BY32;Q9BY32-2	Q9BY32;Q9BY32-2	ITPA_HUMAN	ITPA	Inosine triphosphate pyrophosphatase		373.731	381.35	605.408
Q9BY44;Q9BY44-3	Q9BY44;Q9BY44-2;Q9BY44-3;Q9BY44-4	EIF2A_HUMAN	EIF2A	Eukaryotic translation initiation factor 2A	5229.9	5312.81	4091.95	4987.14
Q9BYB4;Q9BYB4-2	Q9BYB4;Q9BYB4-2	GNB1L_HUMAN	GNB1L	Guanine nucleotide-binding protein subunit beta-like protein 1	1700.56	1583.74	1225.77	1488.59
Q9BYC5;Q9BYC5-3	Q9BYC5;Q9BYC5-3	FUT8_HUMAN	FUT8	Alpha-(1,6)-fucosyltransferase	1245.1	1220.64	1391.09	738.325
Q9BYC9	Q9BYC9	RM20_HUMAN	MRPL20	Large ribosomal subunit protein bL20m	607.964	595.884	342.2	390.82
Q9BYD1	Q9BYD1	RM13_HUMAN	MRPL13	Large ribosomal subunit protein uL13m	2984.59	3660.62	2696.4	3343.51
Q9BYD3;Q9BYD3-2	Q9BYD3;Q9BYD3-2	RM04_HUMAN	MRPL4	Large ribosomal subunit protein uL4m	1730.78	1892.28	1956.18	2320.75
Q9BYD6	Q9BYD6	RM01_HUMAN	MRPL1	Large ribosomal subunit protein uL1m			327.384
Q9BYG3	Q9BYG3	MK67I_HUMAN	NIFK	MKI67 FHA domain-interacting nucleolar phosphoprotein	738.268	1220.44	633.728	766.721
Q9BYG5	Q9BYG5	PAR6B_HUMAN	PARD6B	Partitioning defective 6 homolog beta	1657.33	1725.26	1735.07	1628.45
Q9BYT8	Q9BYT8	NEUL_HUMAN	NLN	Neurolysin, mitochondrial	3034.06	3480.77	3623.3	3126.48
Q9BZE1	Q9BZE1	RM37_HUMAN	MRPL37	Large ribosomal subunit protein mL37	2010.86	1631.4	1280.21	1598.97
Q9BZE4;Q9BZE4-2;Q9BZE4-3	Q9BZE4;Q9BZE4-2;Q9BZE4-3	GTPB4_HUMAN	GTPBP4	GTP-binding protein 4	977.214	1601.58	1352.42	867.583
Q9BZE9;Q9BZE9-2;Q9BZE9-3;Q9BZE9-4	Q9BZE9;Q9BZE9-2;Q9BZE9-3;Q9BZE9-4	ASPC1_HUMAN	ASPSCR1	Tether containing UBX domain for GLUT4	921.941	944.423	1269.81	907.976
Q9BZF1;Q9BZF1-2;Q9BZF1-3	Q9BZF1;Q9H0X9;Q9BZF1-2;Q9BZF1-3;Q9H0X9-2;Q9H0X9-3	OSBL8_HUMAN	OSBPL8	Oxysterol-binding protein-related protein 8	1533.15	1336.28	1602.89	1049.83
Q9BZG1;Q9BZG1-2	Q9BZG1;Q9BZG1-2	RAB34_HUMAN	RAB34	Ras-related protein Rab-34	2391.71	2494.68	2532.55	1707.1
Q9BZG8;Q9BZG8-1	Q9BZG8;Q9BZG8-1;Q9BZG8-2	DPH1_HUMAN	DPH1	2-(3-amino-3-carboxypropyl)histidine synthase subunit 1		564.536	443.383	258.76
Q9BZH6	Q9BZH6	WDR11_HUMAN	WDR11	WD repeat-containing protein 11	2793.86	1527.55	1626.64	1998.58
Q9BZJ0;Q9BZJ0-2;Q9BZJ0-3	Q9BZJ0;Q9BZJ0-2;Q9BZJ0-3	CRNL1_HUMAN	CRNKL1	Crooked neck-like protein 1	1753.24	1328.12	1355.3	1262.99
Q9BZK7	Q9BZK7	TBL1R_HUMAN	TBL1XR1	F-box-like/WD repeat-containing protein TBL1XR1	997.248	673.973	568.882	796.179
Q9BZX2	Q9BZX2	UCK2_HUMAN	UCK2	Uridine-cytidine kinase 2	2339.17	1978.09	3277.63	3430.68
Q9C0B1	Q9C0B1	FTO_HUMAN	FTO	Alpha-ketoglutarate-dependent dioxygenase FTO	1762.55	1863.17	1845.06	2075.84
Q9C0C2;Q9C0C2-2	Q9C0C2;Q9C0C2-2	TB182_HUMAN	TNKS1BP1	182 kDa tankyrase-1-binding protein	690.034	556.093	776.425	785.882
Q9C0C9	Q9C0C9	UBE2O_HUMAN	UBE2O	(E3-independent) E2 ubiquitin-conjugating enzyme	1617.35	1399.57	1414.2	2058.94
Q9C0D5;Q9C0D5-2	Q9C0D5;Q9C0D5-2	TANC1_HUMAN	TANC1	Protein TANC1	1233.44	1147.04	1382.94	843.889
Q9GZN8;Q9GZN8-2	Q9GZN8;Q9GZN8-2	ADSSP_HUMAN	ADISSP	Adipose-secreted signaling protein	7734.1	8555.89	7079.87	8216.59
Q9GZP9	Q9GZP9	DERL2_HUMAN	DERL2	Derlin-2	4327.72	4234.84	5718.2	3294.84
Q9GZR7;Q9GZR7-2	Q9GZR7;Q9GZR7-2	DDX24_HUMAN	DDX24	ATP-dependent RNA helicase DDX24		985.24	1033.05	723.752
Q9GZS3	Q9GZS3	SKI8_HUMAN	SKIC8	Superkiller complex protein 8	1965.63	1881.24	1291.58	2326.53
Q9GZT4	Q9GZT4	SRR_HUMAN	SRR	Serine racemase				289.333
Q9GZT8;Q9GZT8-2	Q9GZT8;Q9GZT8-2	NIF3L_HUMAN	NIF3L1	NIF3-like protein 1	3728.04	4264.85	3427.52	4292.27
Q9GZZ1	Q9GZZ1	NAA50_HUMAN	NAA50	N-alpha-acetyltransferase 50	3293.36	3663.67	3845.83	4186.08
Q9GZZ9	Q9GZZ9	UBA5_HUMAN	UBA5	Ubiquitin-like modifier-activating enzyme 5	1161.92	763.367	806.287	1066.03
Q9H082	Q9H082	RB33B_HUMAN	RAB33B	Ras-related protein Rab-33B	54575.9	49129.4	48446	50379.1
Q9H089	Q9H089	LSG1_HUMAN	LSG1	Large subunit GTPase 1 homolog	2013.04	1807.91	1880.12	2141.78
Q9H0A0;Q9H0A0-2	Q9H0A0;Q9H0A0-2	NAT10_HUMAN	NAT10	RNA cytidine acetyltransferase	3818.57	3259.53	3214.49	3046.49
Q9H0A8;Q9H0A8-2;Q9H0A8-3	Q9H0A8;Q9H0A8-2;Q9H0A8-3	COMD4_HUMAN	COMMD4	COMM domain-containing protein 4	2372.41	3159.24	2094.09	2865.57
Q9H0C8	Q9H0C8	ILKAP_HUMAN	ILKAP	Integrin-linked kinase-associated serine/threonine phosphatase 2C	804.992		321.672	654.954
Q9H0D6;Q9H0D6-2	Q9H0D6;Q9H0D6-2	XRN2_HUMAN	XRN2	5'-3' exoribonuclease 2	4755.04	3986.94	4584.53	5124.52
Q9H0H5	Q9H0H5	RGAP1_HUMAN	RACGAP1	Rac GTPase-activating protein 1	364.073	247.756	364.622	593.046
Q9H0R4;Q9H0R4-2	Q9H0R4;Q9H0R4-2	HDHD2_HUMAN	HDHD2	Haloacid dehalogenase-like hydrolase domain-containing protein 2	2189.45	1658.5	1484.08	826.725
Q9H0S4;Q9H0S4-2	Q9H0S4;Q9H0S4-2	DDX47_HUMAN	DDX47	Probable ATP-dependent RNA helicase DDX47	731.523	675.397	871.952	810.029
Q9H0U3;Q9H0U3-2	Q9H0U3;Q9H0U3-2	MAGT1_HUMAN	MAGT1	Magnesium transporter protein 1	2301.26	1961.12	2586.73	2623.66
Q9H0U4	Q9H0U4;Q92928	RAB1B_HUMAN	RAB1B	Ras-related protein Rab-1B	583.562	1142.79	1224.3	1030.86
Q9H1A4	Q9H1A4	APC1_HUMAN	ANAPC1	Anaphase-promoting complex subunit 1	816.465	564.13	1589.54
Q9H1P3;Q9H1P3-2	Q9H1P3;Q9H1P3-2	OSBL2_HUMAN	OSBPL2	Oxysterol-binding protein-related protein 2	322.421	221.278	210.624	408.505
Q9H223	Q9H223;Q9NZN3;Q9NZN3-2	EHD4_HUMAN	EHD4	EH domain-containing protein 4	1325.11	1116.93	1543.8	1438.35
Q9H267;Q9H267-2	Q9H267;Q9H267-2	VP33B_HUMAN	VPS33B	Vacuolar protein sorting-associated protein 33B	2191.41	1802.11	2301.72	1889.16
Q9H269;Q9H269-2	Q9H269;Q9H269-2	VPS16_HUMAN	VPS16	Vacuolar protein sorting-associated protein 16 homolog	2233.31	1809.11	1669.1	2090.13
Q9H270	Q9H270	VPS11_HUMAN	VPS11	Vacuolar protein sorting-associated protein 11 homolog	1760.21	2009.79	1728.14	2007.12
Q9H2H8	Q9H2H8	PPIL3_HUMAN	PPIL3	Peptidyl-prolyl cis-trans isomerase-like 3	1180.07	1410.1	1272.77	799.415
Q9H2K8	Q9H2K8	TAOK3_HUMAN	TAOK3	Serine/threonine-protein kinase TAO3	2126.39	1667.56	2301.28	1995.52
[truncated: 341 more rows]

## Sheet: ON BENCH ABPP DUBS
Protein.Group	Protein.Ids	Protein.Names	Genes	First.Protein.Description	HA-Ub-PA 1	HA-Ub-PA 2	HA-Ub-PA 3	No HA-Ub-PA
P54252;P54252-1;P54252-3;P54252-4;P54252-5	P54252;P54252-1;P54252-3;P54252-4;P54252-5	ATX3_HUMAN	ATXN3	Ataxin-3	2005.28	1467.96	2173.64	930.13
Q8TAC2;Q8TAC2-2	Q8TAC2;Q8TAC2-2	JOS2_HUMAN	JOSD2	Josephin-2	1795.71	859.128	1278.13
Q9NP73-2	Q9NP73;Q9NP73-2;Q9NP73-3	ALG13_HUMAN	ALG13	Isoform 2 of Putative bifunctional UDP-N-acetylglucosamine transferase and deubiquitinase ALG13	1265.23	851.744	988.035	642.125
Q01804	Q01804;Q01804-3;Q01804-5	OTUD4_HUMAN	OTUD4	OTU domain-containing protein 4	8162.06	8033.75	6859.1	394.162
Q6GQQ9;Q6GQQ9-2	Q6GQQ9;Q6GQQ9-2	OTU7B_HUMAN	OTUD7B	OTU domain-containing protein 7B	13594.8	17678.8	14222.6	1326.78
Q8N6M0	Q8N6M0	OTU6B_HUMAN	OTUD6B	Deubiquitinase OTUD6B	30735	30419.5	25115.7	907.559
Q96DC9	Q96DC9	OTUB2_HUMAN	OTUB2	Ubiquitin thioesterase OTUB2	1794.7	2593.42	1311.11
Q96FW1	Q96FW1;Q96FW1-2	OTUB1_HUMAN	OTUB1	Ubiquitin thioesterase OTUB1	122360	154312	111049	10264.9
Q96JH7	Q96JH7	VCIP1_HUMAN	VCPIP1	Deubiquitinating protein VCPIP1	14832.6	13233.3	11714.7	1691.62
Q92560	Q92560	BAP1_HUMAN	BAP1	Ubiquitin carboxyl-terminal hydrolase BAP1	4210.4	4081.93	3384.72
P15374	P15374	UCHL3_HUMAN	UCHL3	Ubiquitin carboxyl-terminal hydrolase isozyme L3	93162	103405	81353.9	15247.8
Q9Y5K5;Q9Y5K5-2;Q9Y5K5-3;Q9Y5K5-4	Q9Y5K5;Q9Y5K5-2;Q9Y5K5-3;Q9Y5K5-4	UCHL5_HUMAN	UCHL5	Ubiquitin carboxyl-terminal hydrolase isozyme L5	71012.1	69958.5	59366	3128.8
Q9NQC7;Q9NQC7-2	Q9NQC7;Q9NQC7-2	CYLD_HUMAN	CYLD	Ubiquitin carboxyl-terminal hydrolase CYLD	4739.54	3938.93	3652.8
Q504Q3;Q504Q3-2;Q504Q3-3	Q504Q3;Q504Q3-2;Q504Q3-3	PAN2_HUMAN	PAN2	PAN2-PAN3 deadenylation complex catalytic subunit PAN2	1018.65	539.267	634.06	297.4
O75317	O75317	UBP12_HUMAN	USP12	Ubiquitin carboxyl-terminal hydrolase 12	1913.72	2417.6	1212.08
O94782	O94782	UBP1_HUMAN	USP1	Ubiquitin carboxyl-terminal hydrolase 1	3768.36	3836.97	3408.19
O94966-5	O94966;O94966-3;O94966-4;O94966-5;O94966-6;O94966-7	UBP19_HUMAN	USP19	Isoform 5 of Ubiquitin carboxyl-terminal hydrolase 19	38655.7	36338.8	33102.6	2839.5
P40818	P40818	UBP8_HUMAN	USP8	Ubiquitin carboxyl-terminal hydrolase 8	220546	211050	184590	13446.5
P45974;P45974-2	P45974;P45974-2	UBP5_HUMAN	USP5	Ubiquitin carboxyl-terminal hydrolase 5	542567	506918	432931	28936.4
P51784	P51784	UBP11_HUMAN	USP11	Ubiquitin carboxyl-terminal hydrolase 11	13418.7	13107.3	11929.2	738.255
P54578;P54578-2	P54578;P54578-2;P54578-3	UBP14_HUMAN	USP14	Ubiquitin carboxyl-terminal hydrolase 14	222473	223470	184739	14133.9
P62068;P62068-4	O75317;P62068;P62068-2;P62068-3;P62068-4	UBP46_HUMAN	USP46	Ubiquitin carboxyl-terminal hydrolase 46	29044.8	34234.2	27287.1	3401.32
Q13107;Q13107-2	Q13107;Q13107-2;Q13107-3	UBP4_HUMAN	USP4	Ubiquitin carboxyl-terminal hydrolase 4	31995.9	35194.1	27582.2	3049.38
Q14694;Q14694-2;Q14694-3	Q14694;Q14694-2;Q14694-3	UBP10_HUMAN	USP10	Ubiquitin carboxyl-terminal hydrolase 10	146834	128513	117060	16988.1
Q53GS9;Q53GS9-2;Q53GS9-3	Q53GS9;Q53GS9-2;Q53GS9-3	SNUT2_HUMAN	USP39	U4/U6.U5 tri-snRNP-associated protein 2	1176.92	1244.29	1136.01
Q70CQ2	Q70CQ2;Q70CQ2-2;Q70CQ2-3	UBP34_HUMAN	USP34	Ubiquitin carboxyl-terminal hydrolase 34	15084	15518.6	11961.9	1564.67
Q70CQ3	Q70CQ3	UBP30_HUMAN	USP30	Ubiquitin carboxyl-terminal hydrolase 30	3069.18	3271.48	3160.24
Q70CQ4	Q70CQ4	UBP31_HUMAN	USP31	Ubiquitin carboxyl-terminal hydrolase 31	2463.62	2638.58	2317.27
Q70EL4;Q70EL4-4	Q70EL4;Q70EL4-3;Q70EL4-4	UBP43_HUMAN	USP43	Ubiquitin carboxyl-terminal hydrolase 43	2092.61	2189.03	1433.76
Q86T82;Q86T82-2	Q86T82;Q86T82-2	UBP37_HUMAN	USP37	Ubiquitin carboxyl-terminal hydrolase 37	540.91	337.124	278.553
Q86UV5;Q86UV5-8	Q86UV5;Q86UV5-2;Q86UV5-5;Q86UV5-8	UBP48_HUMAN	USP48	Ubiquitin carboxyl-terminal hydrolase 48	8284.41	8371.74	7677.45	1270.69
Q8NB14	Q8NB14;Q8NB14-2	UBP38_HUMAN	USP38	Ubiquitin carboxyl-terminal hydrolase 38	17231.1	15932.4	13851.9	1587.86
Q8NFA0	Q8NFA0	UBP32_HUMAN	USP32	Ubiquitin carboxyl-terminal hydrolase 32	71837.2	72243.3	59276.4	4912.67
Q8TEY7;Q8TEY7-2;Q8TEY7-3	Q8TEY7;Q8TEY7-2;Q8TEY7-3	UBP33_HUMAN	USP33	Ubiquitin carboxyl-terminal hydrolase 33	1026.37	1252.97	975.218	687.122
Q92995;Q92995-2	Q92995;Q92995-2	UBP13_HUMAN	USP13	Ubiquitin carboxyl-terminal hydrolase 13	2150.13	1265.52	1514.61	1188.25
Q93008;Q93008-3	O00507;Q93008;O00507-2;Q93008-3	USP9X_HUMAN	USP9X	Probable ubiquitin carboxyl-terminal hydrolase FAF-X	52555.1	51756.4	41251.9	3575.79
Q93009;Q93009-3	Q93009;Q93009-3	UBP7_HUMAN	USP7	Ubiquitin carboxyl-terminal hydrolase 7	157732	157015	134043	10056.3
Q96K76-4	Q96K76;Q96K76-2;Q96K76-4	UBP47_HUMAN	USP47	Isoform 4 of Ubiquitin carboxyl-terminal hydrolase 47	27967	30007.8	24430.8	2132.38
Q96RU2-2	Q96RU2;Q96RU2-2	UBP28_HUMAN	USP28	Isoform 2 of Ubiquitin carboxyl-terminal hydrolase 28	7665.12	8253.56	6306.81	708.996
Q9NVE5;Q9NVE5-3	Q9NVE5;Q9NVE5-3	UBP40_HUMAN	USP40	Ubiquitin carboxyl-terminal hydrolase 40	5555.47	4950.72	3765.33	307.991
Q9P275	Q9P275	UBP36_HUMAN	USP36	Ubiquitin carboxyl-terminal hydrolase 36	6260.64	5304.36	4568.32
Q9P2H5	Q9P2H5	UBP35_HUMAN	USP35	Ubiquitin carboxyl-terminal hydrolase 35	1484.36	1506.42	1501.45	622.158
Q9UHP3;Q9UHP3-1;Q9UHP3-3	Q9UHP3;Q9UHP3-1;Q9UHP3-3	UBP25_HUMAN	USP25	Ubiquitin carboxyl-terminal hydrolase 25	5937.04	5161.75	3903.36	587.31
Q9UK80;Q9UK80-3	Q9UK80;Q9UK80-3	UBP21_HUMAN	USP21	Ubiquitin carboxyl-terminal hydrolase 21	1721.66	608.247	1178.22
Q9UPT9	Q9UPT9;Q9UPT9-2	UBP22_HUMAN	USP22	Ubiquitin carboxyl-terminal hydrolase 22	3419.06	3412.93	2291.49	859.753
Q9UPU5	Q9UPU5	UBP24_HUMAN	USP24	Ubiquitin carboxyl-terminal hydrolase 24	18659.5	18689.6	16150.6	1660.22
Q9Y2K6	Q9Y2K6	UBP20_HUMAN	USP20	Ubiquitin carboxyl-terminal hydrolase 20	3216.55	2711.22	1990.4
Q9Y4E8	Q9Y4E8;Q9Y4E8-2;Q9Y4E8-3	UBP15_HUMAN	USP15	Ubiquitin carboxyl-terminal hydrolase 15	133859	136742	112722	7972.99
Q9Y5T5;Q9Y5T5-2	Q9Y5T5;Q9Y5T5-2;Q9Y5T5-3;Q9Y5T5-4	UBP16_HUMAN	USP16	Ubiquitin carboxyl-terminal hydrolase 16	17479.1	16672.7	16044.8	2917.96
Q9Y6I4;Q9Y6I4-2	Q9Y6I4;Q9Y6I4-2	UBP3_HUMAN	USP3	Ubiquitin carboxyl-terminal hydrolase 3	914.96	1138.45	1427.13
