# Supplementary material
Source: Research Square preprint supplement (doi:10.21203/rs.3.rs-9106698/v1)
Supplement: Supplementary file 8 [file c042b7832b474f2fd9d93eb3.xlsx]

## Sheet: DIANN_PA_PR619
Protein.Group	Protein.Ids	Protein.Names	Genes	First.Protein.Description	PA DIA 0 [µM] PR619 Rep 1	PA DIA 0 [µM] PR619 Rep 2	PA DIA 0 [µM] PR619 Rep 3	PA DIA 50 [µM] PR619 Rep 1	PA DIA 50 [µM] PR619 Rep 2	PA DIA 50 [µM] PR619 Rep 3
A0A075B6R9;A0A075B6S2;A0A0A0MRZ7;A0A0C4DH68;A2NJV5	A0A075B6R9;A0A075B6S2;A0A0A0MRZ7;A0A0C4DH68;A2NJV5	KV224_HUMAN;KV229_HUMAN;KVD24_HUMAN;KVD26_HUMAN;KVD29_HUMAN	IGKV2-24;IGKV2-29;IGKV2D-24;IGKV2D-26;IGKV2D-29	Probable non-functional immunoglobulin kappa variable 2D-24	43329.1	29746.7	36099.8	47206.1	84722.7	71322.5
A0A0B4J1V1;A0A0B4J1X5;A0A0C4DH32;P01762;P01763;P01780;P01782	P01780;P01762;P01763;P01782;A0A0B4J1V1;A0A0B4J1X5;A0A0C4DH32	HV307_HUMAN;HV309_HUMAN;HV311_HUMAN;HV320_HUMAN;HV321_HUMAN;HV348_HUMAN;HV374_HUMAN	IGHV3-11;IGHV3-20;IGHV3-21;IGHV3-48;IGHV3-7;IGHV3-74;IGHV3-9	Immunoglobulin heavy variable 3-21	140044	53841.7	93943.6	99251.1	47783.3	76081.7
A0A0B4J2D5;P0DPI2	A0A0B4J2D5;P0DPI2;A0A0B4J2D5-2;P0DPI2-2	GAL3A_HUMAN;GAL3B_HUMAN	GATD3;GATD3B	Putative glutamine amidotransferase-like class 1 domain-containing protein 3B, mitochondrial	408593	345372	379445	183691	221526	171065
A0A3B3IRV3;Q9ULC4;Q9ULC4-2;Q9ULC4-3	Q9ULC4;A0A3B3IRV3;Q9ULC4-2;Q9ULC4-3	MCTS1_HUMAN;MCTS2_HUMAN	MCTS1;MCTS2	Malignant T-cell-amplified sequence 2	122808	139392	173193	178704	197690	223287
A0AV96;A0AV96-2	A0AV96;Q9NQ94;Q8TBY0;Q8TBY0-2;Q8TBY0-3;Q9NQ94-2;Q9NQ94-3;Q9NQ94-4;Q9NQ94-5;Q9NQ94-6;A0AV96-2	RBM47_HUMAN	RBM47	RNA-binding protein 47			24378.7	44096.6	44998.4	46301.4
A0AVT1	A0AVT1;A0AVT1-2	UBA6_HUMAN	UBA6	Ubiquitin-like modifier-activating enzyme 6	43413.8	37798	42392.1	102473	108529	89085.1
A0FGR8;A0FGR8-6	A0FGR8;A0FGR8-6	ESYT2_HUMAN	ESYT2	Extended synaptotagmin-2	70206.4	90354.2	67456.8	80982	65318.9	57688
A1L170;A1L170-2	A1L170;A1L170-2	CA226_HUMAN	C1orf226	Uncharacterized protein C1orf226	32674.2	18825.5		32124.9	42507	38192
A2A2Y4;A2A2Y4-2;A2A2Y4-5	A2A2Y4;A2A2Y4-2;A2A2Y4-5	FRMD3_HUMAN	FRMD3	FERM domain-containing protein 3	156853	91982.8	29504.8
A4UGR9-8	A4UGR9;A4UGR9-2;A4UGR9-3;A4UGR9-8	XIRP2_HUMAN	XIRP2	Isoform 8 of Xin actin-binding repeat-containing protein 2	78370.9	90355.2	95237	78601	110910	88862.5
A5YKK6;A5YKK6-2	A5YKK6;A5YKK6-2	CNOT1_HUMAN	CNOT1	CCR4-NOT transcription complex subunit 1	10334.4	9831.19		62911.5	44817	35152.2
A6NDG6	A6NDG6	PGP_HUMAN	PGP	Glycerol-3-phosphate phosphatase				25395.4	37229	30250.1
A6NHX0	A6NHX0	CAST2_HUMAN	CASTOR2	Cytosolic arginine sensor for mTORC1 subunit 2	57904.1	54472.5	38771.2	25999.3	17005.9
B5ME19;Q99613;Q99613-2	Q99613;B5ME19;Q99613-2	EIF3C_HUMAN;EIFCL_HUMAN	EIF3C;EIF3CL	Eukaryotic translation initiation factor 3 subunit C-like protein	97062.7	124827	128008	242212	280374	249682
E9PAV3;E9PAV3-2;Q13765	Q13765;E9PAV3;E9PAV3-2	NACAM_HUMAN;NACA_HUMAN	NACA	Nascent polypeptide-associated complex subunit alpha, muscle-specific form	257286	219958	158512	134294	149568	91936.8
F8WCM5;P01308	P01308;F8WCM5	INSR2_HUMAN;INS_HUMAN	INS;INS-IGF2	Insulin, isoform 2				22672.9	32805	28140.7
O00148	O00148;O00148-2;O00148-3	DX39A_HUMAN	DDX39A	ATP-dependent RNA helicase DDX39A	121181	70124.9	89998.3	80991.8	47135.5	34127.5
O00154;O00154-4;O00154-6;O00154-7	O00154;O00154-4;O00154-2;O00154-3;O00154-5;O00154-6;O00154-7	BACH_HUMAN	ACOT7	Cytosolic acyl coenzyme A thioester hydrolase	2490000	2080000	2120000	1260000	1320000	1230000
O00159;O00159-2;O00159-3	O00159;O00159-3;O00159-2	MYO1C_HUMAN	MYO1C	Unconventional myosin-Ic	46029.9	46577.8	46488.6	36199.9	34617.2	28483.8
O00165;O00165-2;O00165-3;O00165-4;O00165-5	O00165;O00165-2;O00165-3;O00165-4;O00165-5	HAX1_HUMAN	HAX1	HCLS1-associated protein X-1	16517		17390.3
O00170	O00170	AIP_HUMAN	AIP	AH receptor-interacting protein				167617	113138	113410
O00186	O00186	STXB3_HUMAN	STXBP3	Syntaxin-binding protein 3	68488.5	70084.5	83150.2	20228.1
O00203;O00203-3	O00203;O00203-3	AP3B1_HUMAN	AP3B1	AP-3 complex subunit beta-1	72445	71070.8	84439.1	95979.3	77899.8	83817.2
O00204;O00204-2	O00204;O00204-2	ST2B1_HUMAN	SULT2B1	Sulfotransferase 2B1	29937.4	54931	19088.5	191225	137763	177592
O00214;O00214-2	O00214;O00214-2	LEG8_HUMAN	LGALS8	Galectin-8	58259.1	78447.8	72633.3	59203.8	65375.8	65878.3
O00231	O00231;O00231-2	PSD11_HUMAN	PSMD11	26S proteasome non-ATPase regulatory subunit 11	61387.1	53170.1	62823.2	333112	320727	302011
O00232	O00232;O00232-2	PSD12_HUMAN	PSMD12	26S proteasome non-ATPase regulatory subunit 12	31633.3	24929.7	20793.9	153721	166063	162747
O00233;O00233-2	O00233;O00233-2	PSMD9_HUMAN	PSMD9	26S proteasome non-ATPase regulatory subunit 9	29038.8	27522.7	33964.2	84793.4	74636.6	47829.8
O00264;O00264-2	O00264;O00264-2	PGRC1_HUMAN	PGRMC1	Membrane-associated progesterone receptor component 1				60179.5	49887.5	44175.9
O00267;O00267-2	O00267;O00267-2	SPT5H_HUMAN	SUPT5H	Transcription elongation factor SPT5	78920.7	75352.9	68126.7	64669.3	54325.1	56394.3
O00273;O00273-2	O00273;O00273-2	DFFA_HUMAN	DFFA	DNA fragmentation factor subunit alpha				25611.8	21273
O00299	O00299	CLIC1_HUMAN	CLIC1	Chloride intracellular channel protein 1	321010	352028	365579	1460000	1630000	1530000
O00303	O00303	EIF3F_HUMAN	EIF3F	Eukaryotic translation initiation factor 3 subunit F	285602	223642	279496	382943	415655	361605
O00401	O00401	WASL_HUMAN	WASL	Actin nucleation-promoting factor WASL				41951.4	41560.6	43848.8
O00410;O00410-3	O00410;O00410-2;O00410-3	IPO5_HUMAN	IPO5	Importin-5	76820.5	108070	110167	441619	466545	447854
O00418	O00418	EF2K_HUMAN	EEF2K	Eukaryotic elongation factor 2 kinase	12472.6	9307.44
O00422;O00422-2	O00422;O00422-2	SAP18_HUMAN	SAP18	Histone deacetylase complex subunit SAP18	311862	420952	582824	143753	182768	124051
O00429;O00429-2;O00429-3;O00429-4;O00429-5;O00429-6;O00429-8;O00429-9	O00429;O00429-2;O00429-3;O00429-4;O00429-5;O00429-6;O00429-7;O00429-8;O00429-9	DNM1L_HUMAN	DNM1L	Dynamin-1-like protein	36462.1	29698.1	26815	171447	99761.9	112083
O00469;O00469-2	O00469;O00469-2;O00469-3	PLOD2_HUMAN	PLOD2	Procollagen-lysine,2-oxoglutarate 5-dioxygenase 2	11608.6	10333.8	19005.6	12724	17946.3	12462.9
O00471	O00471	EXOC5_HUMAN	EXOC5	Exocyst complex component 5				872387	865624	794561
O00487	O00487	PSDE_HUMAN	PSMD14	26S proteasome non-ATPase regulatory subunit 14	292177	338479	316376	159096	235673	222580
O00505	O00505	IMA4_HUMAN	KPNA3	Importin subunit alpha-4	44585.9	34092.6	55593.6	171201	177780	180335
O00507-2	O00507;O00507-2	USP9Y_HUMAN	USP9Y	Isoform Short of Probable ubiquitin carboxyl-terminal hydrolase FAF-Y	2400000	1650000	2050000			31621
O00571;O00571-2	O00571;O15523;Q9NQI0;O00571-2;O15523-2;Q9NQI0-2;Q9NQI0-3;Q9NQI0-4	DDX3X_HUMAN	DDX3X	ATP-dependent RNA helicase DDX3X	184560	176180	146504	275937	248974	286939
O00629	O00629	IMA3_HUMAN	KPNA4	Importin subunit alpha-3		35472.8	37297.6	74282	70590.9	64581.8
O00743;O00743-2;O00743-3	O00743;O00743-2;O00743-3	PPP6_HUMAN	PPP6C	Serine/threonine-protein phosphatase 6 catalytic subunit	262886	306406	265603	115326	140599	100541
O00757	O00757	F16P2_HUMAN	FBP2	Fructose-1,6-bisphosphatase isozyme 2	118241	91404.3	102975	66380.1	76263	44221.1
O00764	O00764;O00764-3	PDXK_HUMAN	PDXK	Pyridoxal kinase	218777	197784	188544	189765	208733	181107
O14497;O14497-2;O14497-3	O14497;O14497-2;O14497-3	ARI1A_HUMAN	ARID1A	AT-rich interactive domain-containing protein 1A				32057.9	26662.7	20947.6
O14545	O14545	TRAD1_HUMAN	TRAFD1	TRAF-type zinc finger domain-containing protein 1	16617.5	5563.71	15245.8	30340.6	45813.4	50084.9
O14579	O14579;O14579-2;O14579-3	COPE_HUMAN	COPE	Coatomer subunit epsilon	12587.2	21903.7	7771.25	97577.8	97520.9	78373.6
O14602;P47813	P47813;O14602	IF1AX_HUMAN;IF1AY_HUMAN	EIF1AX;EIF1AY	Eukaryotic translation initiation factor 1A, Y-chromosomal	9542.44		10804.2	48967.8	57087.5	66926.4
O14618	O14618	CCS_HUMAN	CCS	Copper chaperone for superoxide dismutase		13407.8	13941	62336.9	74712.1	69352.5
O14744;O14744-2	O14744;O14744-2;O14744-3;O14744-5	ANM5_HUMAN	PRMT5	Protein arginine N-methyltransferase 5	245837	248666	290574	122395	152207	128148
O14745	O14745;O14745-2	NHRF1_HUMAN	NHERF1	Na(+)/H(+) exchange regulatory cofactor NHE-RF1	163409	169796	157067	355690	441872	349519
O14773	O14773	TPP1_HUMAN	TPP1	Tripeptidyl-peptidase 1	87933.7	115733	156640	204174	225420	201876
O14776;O14776-2	O14776;O14776-2	TCRG1_HUMAN	TCERG1	Transcription elongation regulator 1				32137.7	51370.9	46940
O14818	O14818;Q8TAA3;O14818-2;Q8TAA3-2;Q8TAA3-5	PSA7_HUMAN	PSMA7	Proteasome subunit alpha type-7	336820	303076	348556	417422	454270	360790
O14828;O14828-2	O14828;O14828-2	SCAM3_HUMAN	SCAMP3	Secretory carrier-associated membrane protein 3	45586.7	39215.3	32633.8	23729.6	23860
O14908	O14908;O14908-2	GIPC1_HUMAN	GIPC1	PDZ domain-containing protein GIPC1	19563.4	14164.3	13125.1	64451.6	55909.3	48988.5
O14950;P19105	O14950;P19105	ML12A_HUMAN;ML12B_HUMAN	MYL12A;MYL12B	Myosin regulatory light chain 12B		9832.82		68423.9	56690.2	49346.9
O14964	O14964;O14964-2	HGS_HUMAN	HGS	Hepatocyte growth factor-regulated tyrosine kinase substrate				56170.3	46877.9	32880.2
O14966;P57729;Q13637	O14966;P57729;Q13637	RAB32_HUMAN;RAB38_HUMAN;RAB7L_HUMAN	RAB29;RAB32;RAB38	Ras-related protein Rab-7L1	18413	31248.3
O14974;O14974-3;O14974-4;O14974-5	O14974;O14974-2;O14974-3;O14974-4;O14974-5	MYPT1_HUMAN	PPP1R12A	Protein phosphatase 1 regulatory subunit 12A				155221	109362	81071
O14979	O14979;O14979-2;O14979-3	HNRDL_HUMAN	HNRNPDL	Heterogeneous nuclear ribonucleoprotein D-like	243212	274461	290655	583581	707718	783360
O14980	O14980	XPO1_HUMAN	XPO1	Exportin-1	124789	142608	164954	686934	617910	604028
O15020;O15020-2	O15020;O15020-2	SPTN2_HUMAN	SPTBN2	Spectrin beta chain, non-erythrocytic 2		57140.1		86070.9	56849.7	44667.4
O15027;O15027-2;O15027-3;O15027-4;O15027-5	O15027;O15027-2;O15027-3;O15027-4;O15027-5	SC16A_HUMAN	SEC16A	Protein transport protein Sec16A	70306.3	73411.7	68070.9	76686	51721	65262.9
O15067	O15067	PUR4_HUMAN	PFAS	Phosphoribosylformylglycinamidine synthase	138504	130200	124872	89774.8	106692	94823.7
O15075;O15075-2	O15075;O15075-2	DCLK1_HUMAN	DCLK1	Serine/threonine-protein kinase DCLK1	22085.8	30433.7	30040.3	34659.2	23350.1	28617.8
O15084;O15084-1;O15084-4	O15084;Q8N8A2;O15084-1;O15084-2;O15084-4;Q8N8A2-2;Q8N8A2-3;Q8N8A2-4;Q8N8A2-5	ANR28_HUMAN	ANKRD28	Serine/threonine-protein phosphatase 6 regulatory ankyrin repeat subunit A	124376	156416	172995	127207	132439	163022
O15127	O15127	SCAM2_HUMAN	SCAMP2	Secretory carrier-associated membrane protein 2				30215.2		7826.29
O15131;P52294	O15131;P52294	IMA5_HUMAN;IMA6_HUMAN	KPNA1;KPNA5	Importin subunit alpha-6	102524	165820	160047	272476	242019	260350
O15143	O15143	ARC1B_HUMAN	ARPC1B	Actin-related protein 2/3 complex subunit 1B	255316	259707	242174	158370	193671	164996
O15144	O15144	ARPC2_HUMAN	ARPC2	Actin-related protein 2/3 complex subunit 2	206984	274154	239293	204497	253176	187492
O15145	O15145	ARPC3_HUMAN	ARPC3	Actin-related protein 2/3 complex subunit 3	181878			222342	279074	184428
O15231;O15231-2;O15231-3;O15231-4;O15231-6;O15231-7;O15231-8	O15231;O15231-2;O15231-3;O15231-4;O15231-5;O15231-6;O15231-7;O15231-8;O15231-9	ZN185_HUMAN	ZNF185	Zinc finger protein 185	21224.9			69962.3	50946.1	49899
O15260;O15260-2	O15260;O15260-2;O15260-3	SURF4_HUMAN	SURF4	Surfeit locus protein 4	99856.9	63000.9	100594	38033	36674	61673.3
O15269	O15269	SPTC1_HUMAN	SPTLC1	Serine palmitoyltransferase 1	131816	136110	126447	93462.2	67868.2	78768.4
O15294;O15294-3	O15294;O15294-3	OGT1_HUMAN	OGT	UDP-N-acetylglucosamine--peptide N-acetylglucosaminyltransferase 110 kDa subunit	37044.4	32472	50095.7	69609.9	74467.5	78309.9
O15305	O15305;O15305-2	PMM2_HUMAN	PMM2	Phosphomannomutase 2	41853.7	54343.9	45513.1	137935	145091	141609
O15321;O15321-2	O15321;O15321-2	TM9S1_HUMAN	TM9SF1	Transmembrane 9 superfamily member 1	17538.4	21834.1	20061.4	13893.2	31101.2
O15327	O15327	INP4B_HUMAN	INPP4B	Inositol polyphosphate 4-phosphatase type II	39555.1	38149.6	25937.2	152223	129743	115286
O15355	O15355	PPM1G_HUMAN	PPM1G	Protein phosphatase 1G	92672.6	78048.1	85671.7	116252	130985	135721
O15357;O15357-2	O15357;Q92835;Q92835-2;O15357-2;Q92835-3	SHIP2_HUMAN	INPPL1	Phosphatidylinositol 3,4,5-trisphosphate 5-phosphatase 2	46908	57005.7	49707.3	72769.5	48656.4	36786.5
O15371;O15371-2;O15371-3	O15371;O15371-2;O15371-3	EIF3D_HUMAN	EIF3D	Eukaryotic translation initiation factor 3 subunit D	297918	305047	320057	183028	218743	208150
O15372	O15372	EIF3H_HUMAN	EIF3H	Eukaryotic translation initiation factor 3 subunit H	514470	466503	552897	446597	503075	407473
O15460;O15460-2	O15460;O15460-2	P4HA2_HUMAN	P4HA2	Prolyl 4-hydroxylase subunit alpha-2	86093.8	72937.9	85695.7	45256.1	34022.8	39554.4
O15498	O15498;O15498-2	YKT6_HUMAN	YKT6	Synaptobrevin homolog YKT6	155446	177154	170967	204605	286338	242776
O15511;O15511-2	O15511;O15511-2	ARPC5_HUMAN	ARPC5	Actin-related protein 2/3 complex subunit 5	8123.21	7231	7785.28	20205.4	13084.5	17964.2
O43143	O43143	DHX15_HUMAN	DHX15	ATP-dependent RNA helicase DHX15	167763	186291	164182	183333	195892	200045
O43148;O43148-2	O43148;O43148-2	MCES_HUMAN	RNMT	mRNA cap guanine-N7 methyltransferase	32200.2		32879.2
O43172;O43172-2	O43172;O43172-2	PRP4_HUMAN	PRPF4	U4/U6 small nuclear ribonucleoprotein Prp4	68625.6	67202.7	80209.2	34774	46723	31232.4
O43175	O43175	SERA_HUMAN	PHGDH	D-3-phosphoglycerate dehydrogenase	49219.3	45536.1	45811.2	223141	206008	212331
O43237	O43237;O43237-2	DC1L2_HUMAN	DYNC1LI2	Cytoplasmic dynein 1 light intermediate chain 2		45477	77083.7	121948	93148.9	113850
O43242	O43242;O43242-2	PSMD3_HUMAN	PSMD3	26S proteasome non-ATPase regulatory subunit 3	129390	165961	149098	124252	145825	113154
O43252	O43252	PAPS1_HUMAN	PAPSS1	Bifunctional 3'-phosphoadenosine 5'-phosphosulfate synthase 1	120707	113295	124590	149314	166775	163196
O43264;O43264-2	O43264;O43264-2	ZW10_HUMAN	ZW10	Centromere/kinetochore protein zw10 homolog				17722.6	9588.98	8883.93
O43390	O43390;O43390-3	HNRPR_HUMAN	HNRNPR	Heterogeneous nuclear ribonucleoprotein R	541392	656193	727288	930672	1570000	1780000
O43390-2	O43390-2;O43390-4	HNRPR_HUMAN	HNRNPR	Isoform 2 of Heterogeneous nuclear ribonucleoprotein R	48665.4	41557.2	67378.6	41463	65761.5	71421
O43395	O43395;O43395-3	PRPF3_HUMAN	PRPF3	U4/U6 small nuclear ribonucleoprotein Prp3	64872	60558.1	72193	64367.6	60789.6	69203.9
O43396	O43396	TXNL1_HUMAN	TXNL1	Thioredoxin-like protein 1	114975	114356	115898	91807.3	93986.5	95038.9
O43414	O43414	ERI3_HUMAN	ERI3	ERI1 exoribonuclease 3	76683.1	57603.6	63565.2	56472	53474.4	31624.3
O43447;O43447-2	O43447;O43447-2	PPIH_HUMAN	PPIH	Peptidyl-prolyl cis-trans isomerase H	52520.2	63677	63604.4	80754.7	68070.3	80907.9
O43488	O43488;Q8NHP1	ARK72_HUMAN	AKR7A2	Aflatoxin B1 aldehyde reductase member 2	129612	141782	122595	232087	244041	289733
O43491-4	O43491-4	E41L2_HUMAN	EPB41L2	Isoform 4 of Band 4.1-like protein 2	20229.7	12291.5	19625.9	18245.9	22093.7
O43570;O43570-2	O43570;O43570-2	CAH12_HUMAN	CA12	Carbonic anhydrase 12	13912.3	11633.6	16550.4
O43592	O43592	XPOT_HUMAN	XPOT	Exportin-T	44123.9	50867.4	42461.1	102420	101914	103686
O43598;O43598-2	O43598;O43598-2	DNPH1_HUMAN	DNPH1	2'-deoxynucleoside 5'-phosphate N-hydrolase 1	69794.9	67306.3	54165.8	163725	168517	145716
O43615	O43615	TIM44_HUMAN	TIMM44	Mitochondrial import inner membrane translocase subunit TIM44	52340.4	43165.8	56887.1	78513.6	74278.1	63500
O43670;O43670-2;O43670-3;O43670-4	O43670;O43670-2;O43670-3;O43670-4	ZN207_HUMAN	ZNF207	BUB3-interacting and GLEBS motif-containing protein ZNF207		41972.5		110189	114022	115839
O43681	O43681	GET3_HUMAN	GET3	ATPase GET3	132753	132762	160810	269537	264247	280944
O43684;O43684-2	O43684;O43684-2	BUB3_HUMAN	BUB3	Mitotic checkpoint protein BUB3	258969	218438	197355	116453	131278	139652
O43707	O43707;O43707-2;O43707-3	ACTN4_HUMAN	ACTN4	Alpha-actinin-4	341846	370152	397278	1610000	1860000	1630000
O43719	O43719	HTSF1_HUMAN	HTATSF1	HIV Tat-specific factor 1	29953.7	42008.9	27706.7	72105.5	80993.2	76071.1
O43747;O43747-2	O43747;O43747-2	AP1G1_HUMAN	AP1G1	AP-1 complex subunit gamma-1	75406.5	82565.7	64260.1	107500	99981.4	101124
O43776	O43776;O43776-2	SYNC_HUMAN	NARS1	Asparagine--tRNA ligase, cytoplasmic	362945	330338	382338	191073	213217	255713
O43795;O43795-2	O43795;O43795-2	MYO1B_HUMAN	MYO1B	Unconventional myosin-Ib	25047.5	22067.1	30951.8		16035.4
O43809	O43809	CPSF5_HUMAN	NUDT21	Cleavage and polyadenylation specificity factor subunit 5	145852	143123	136701	120442	187997	123345
O43813	O43813	LANC1_HUMAN	LANCL1	Glutathione S-transferase LANCL1	77969.1	73568.4	116547	141206	152463	202629
O43815;O43815-2	O43815;O43815-2	STRN_HUMAN	STRN	Striatin	31768.9	37773.6	34560.8	18633.3	20257.3	20925.5
O43823	O43823	AKAP8_HUMAN	AKAP8	A-kinase anchor protein 8	25403.9	16491.9	37284.2		41853.5	40716.2
O43837	O43837;O43837-3	IDH3B_HUMAN	IDH3B	Isocitrate dehydrogenase [NAD] subunit beta, mitochondrial	27674	35851.2	33261.7	57015.9	48450.7	42409.5
O43847;O43847-2	O43847;O43847-2	NRDC_HUMAN	NRDC	Nardilysin	122983	136611	105510	70571.6	97475.1	77950
O43852;O43852-3	O43852;O43852-10;O43852-11;O43852-13;O43852-14;O43852-3;O43852-5;O43852-6	CALU_HUMAN	CALU	Calumenin	124618	132190	122106	103346	153064	132314
O43865;O43865-2;Q96HN2;Q96HN2-2;Q96HN2-3;Q96HN2-4	O43865;Q96HN2;O43865-2;Q96HN2-2;Q96HN2-3;Q96HN2-4	SAHH2_HUMAN;SAHH3_HUMAN	AHCYL1;AHCYL2	S-adenosylhomocysteine hydrolase-like protein 1	236899	228399	230625	146191	142252	124704
O60232	O60232	ZNRD2_HUMAN	ZNRD2	Protein ZNRD2				18080.1	18097.5	20761.8
O60256;O60256-3	O60256;O60256-3	KPRB_HUMAN	PRPSAP2	Phosphoribosyl pyrophosphate synthase-associated protein 2	224990	198501	251335	270635	242484	283320
O60271;O60271-2;O60271-4;O60271-9	O60271;O60271-3;O60271-5;O60271-2;O60271-4;O60271-9	JIP4_HUMAN	SPAG9	C-Jun-amino-terminal kinase-interacting protein 4	42654.2	52309.2	37184	35175.9	48149.8	44167.3
O60313-13;O60313-9	O60313;O60313-10;O60313-2;O60313-9;O60313-11;O60313-13	OPA1_HUMAN	OPA1	Isoform 7 of Dynamin-like 120 kDa protein, mitochondrial				17932.2	18492	13832
O60333;O60333-2;O60333-3;O60333-4;Q12756;Q12756-2;Q12756-3	O43896;O60333;O60333-2;Q12756;O60333-3;O60333-4;Q12756-2;Q12756-3	KIF1A_HUMAN;KIF1B_HUMAN	KIF1A;KIF1B	Kinesin-like protein KIF1B	85547.5	84650.5	96081.7	65916.1	75377.4	50876
O60341;O60341-2	O60341;O60341-2	KDM1A_HUMAN	KDM1A	Lysine-specific histone demethylase 1A	118166	96981.2	111362	78036	66517.2	69072
O60437	O60437	PEPL_HUMAN	PPL	Periplakin				104571	85236.1	84371.7
O60493-3	O60493;O60493-3;O60493-4	SNX3_HUMAN	SNX3	Isoform 3 of Sorting nexin-3	9939.29	11916.9	11989.3	112702	93141.1	98052.3
O60502	O60502;O60502-2;O60502-4	OGA_HUMAN	OGA	Protein O-GlcNAcase	268195	199226	148176	120122	131612	122467
O60506;O60506-2	O60506;O60506-4;O60506-2;O60506-3;O60506-5	HNRPQ_HUMAN	SYNCRIP	Heterogeneous nuclear ribonucleoprotein Q	185986	209078	224083	633771	900703	1160000
O60508	O60508	PRP17_HUMAN	CDC40	Pre-mRNA-processing factor 17	80396	77644.4	62624.9	37437.2	57015.9	53995.4
O60547;O60547-2	O60547;O60547-2	GMDS_HUMAN	GMDS	GDP-mannose 4,6 dehydratase	356367	373986	323494	299813	348780	266045
O60563	O60563	CCNT1_HUMAN	CCNT1	Cyclin-T1	17495.5	14149.2		18023.8
O60568	O60568	PLOD3_HUMAN	PLOD3	Multifunctional procollagen lysine hydroxylase and glycosyltransferase LH3	68942.5	50711.6	55803.2	37831.5	40549.9	21689.5
O60610;O60610-2;O60610-3	O60610;O60610-2;O60610-3	DIAP1_HUMAN	DIAPH1	Protein diaphanous homolog 1	19441.2	22794.4	20799.3	106975	48969.3	56381.1
O60645	O60645	EXOC3_HUMAN	EXOC3	Exocyst complex component 3	5741.36		11195.6	95967.9	38236.4	32009.2
O60671;O60671-2	O60671;O60671-2	RAD1_HUMAN	RAD1	Cell cycle checkpoint protein RAD1	68503.6	46351.1	60612.3
O60701	O60701;O60701-2;O60701-3	UGDH_HUMAN	UGDH	UDP-glucose 6-dehydrogenase	6510000	6240000	6890000	4170000	4820000	4640000
O60716;O60716-10;O60716-11;O60716-13;O60716-17;O60716-18;O60716-19;O60716-2;O60716-21;O60716-3;O60716-5;O60716-9	O60716;O60716-10;O60716-11;O60716-12;O60716-13;O60716-14;O60716-15;O60716-16;O60716-17;O60716-18;O60716-19;O60716-2;O60716-20;O60716-21;O60716-22;O60716-23;O60716-24;O60716-3;O60716-4;O60716-5;O60716-6;O60716-7;O60716-8;O60716-9	CTND1_HUMAN	CTNND1	Catenin delta-1				37453.1	34784	51338.8
O60739;P41567	P41567;O60739	EIF1B_HUMAN;EIF1_HUMAN	EIF1;EIF1B	Eukaryotic translation initiation factor 1b		28016.8	19125.5	91369.1	81021.3	51716.3
O60749;O60749-2	O60749;Q13596;O60749-2;Q13596-2	SNX2_HUMAN	SNX2	Sorting nexin-2		12445.2		111489	104181	71500.9
O60762	O60762	DPM1_HUMAN	DPM1	Dolichol-phosphate mannosyltransferase subunit 1	48664.7	55633.7	44357.1	46527.4	53587.1	42763.4
O60763;O60763-2	O60763;O60763-2	USO1_HUMAN	USO1	General vesicular transport factor p115	21351	19009	17423.4	97835.5	113161	92373.9
O60814;P57053;P58876;P62807;Q5QNW6;Q5QNW6-2;Q93079;Q99877;Q99879;Q99880	O60814;P06899;P23527;P33778;P57053;P58876;P62807;Q16778;Q5QNW6;Q8N257;Q93079;Q96A08;Q99877;Q99879;Q99880;Q5QNW6-2	H2B1C_HUMAN;H2B1D_HUMAN;H2B1H_HUMAN;H2B1K_HUMAN;H2B1L_HUMAN;H2B1M_HUMAN;H2B1N_HUMAN;H2B2F_HUMAN;H2BFS_HUMAN	H2BC12;H2BC12L;H2BC13;H2BC14;H2BC15;H2BC18;H2BC4;H2BC5;H2BC9	Histone H2B type 1-K	510054	494589	585824	584324	718291	712590
O60829	O60829	PAGE4_HUMAN	PAGE4	P antigen family member 4	40822.9	23822.2	21919.6
O60884	O60884	DNJA2_HUMAN	DNAJA2	DnaJ homolog subfamily A member 2	81778.9	79286.6	90136.4	145941	143246	106731
O60907;O60907-2;Q9BQ87	O60907;Q9BQ87;O60907-2	TBL1X_HUMAN;TBL1Y_HUMAN	TBL1X;TBL1Y	F-box-like/WD repeat-containing protein TBL1X	17656	19642.9	12286.1	23245.3	14056.4	21285.1
O60942;O60942-2;O60942-3;O60942-4	O60942;O60942-2;O60942-3;O60942-4	MCE1_HUMAN	RNGTT	mRNA-capping enzyme	41044.4	53200.8	41729.9	36209.9	23708.4	18153.8
O75044	O75044;P0DJJ0;P0DMP2	SRGP2_HUMAN	SRGAP2	SLIT-ROBO Rho GTPase-activating protein 2				51863.4	30961.4	35216.8
O75052;O75052-3	O75052;O75052-3	CAPON_HUMAN	NOS1AP	Carboxyl-terminal PDZ ligand of neuronal nitric oxide synthase protein	46817.9	24506.4	24601.8	68922.9	69099.5	54595.1
O75083	O75083	WDR1_HUMAN	WDR1	WD repeat-containing protein 1	3070000	2800000	2880000	1490000	1720000	1640000
O75116	O75116	ROCK2_HUMAN	ROCK2	Rho-associated protein kinase 2				33297.5	27427.8
O75131	O75131	CPNE3_HUMAN	CPNE3	Copine-3	837672	719030	704452	476588	458419	465882
O75143;O75143-2;O75143-3;O75143-4;O75143-5	O75143;O75143-2;O75143-3;O75143-4;O75143-5	ATG13_HUMAN	ATG13	Autophagy-related protein 13	47258.2	55264.4	52953.4	47262.6	37086.4
O75146;O75146-2	O75146;O75146-2	HIP1R_HUMAN	HIP1R	Huntingtin-interacting protein 1-related protein				25699.3
O75153	O75153	CLU_HUMAN	CLUH	Clustered mitochondria protein homolog	67015.5	49479.9	65093.6	56838.7	70838	64875.4
O75157;O75157-2	O75157;O75157-2	T22D2_HUMAN	TSC22D2	TSC22 domain family protein 2	16509.5	17836.5		21786.5	21879.7	9199.44
O75190;O75190-2;O75190-3	O75190;O75190-2;P25686;Q8NHS0;O75190-3;O75190-4;P25686-2	DNJB6_HUMAN	DNAJB6	DnaJ homolog subfamily B member 6	121711	118314	138906	131298	132729	88384.2
O75223	O75223;O75223-3	GGCT_HUMAN	GGCT	Gamma-glutamylcyclotransferase	867025	760777	758703	415850	441660	397564
O75312	O75312	ZPR1_HUMAN	ZPR1	Zinc finger protein ZPR1		74252.7	109275	112359	109953	144448
O75317	O75317	UBP12_HUMAN	USP12	Ubiquitin carboxyl-terminal hydrolase 12	138923	135274	147298
O75340;O75340-2	O75340;O75340-2	PDCD6_HUMAN	PDCD6	Programmed cell death protein 6	42965.4	48752.8	50541.6	127757	123202	121964
O75367;O75367-1;O75367-3	O75367;O75367-1;O75367-3	H2AY_HUMAN	MACROH2A1	Core histone macro-H2A.1		24775.3	14442.9	32363.3	29124.9	20449.1
O75368	O75368	SH3L1_HUMAN	SH3BGRL	Adapter SH3BGRL	25631.1	25056.6	19071.4	20734.5	18583.2	24312.3
O75369;O75369-2;O75369-8;O75369-9	O75369;O75369-2;O75369-3;O75369-6;O75369-4;O75369-5;O75369-7;O75369-8;O75369-9	FLNB_HUMAN	FLNB	Filamin-B	233228	205025	181797	1540000	1120000	1040000
O75390	O75390	CISY_HUMAN	CS	Citrate synthase, mitochondrial	42789.1	38250.8	37874	109877	133721	117909
O75396	O75396	SC22B_HUMAN	SEC22B	Vesicle-trafficking protein SEC22b	13253	26964.5		166207	140238	124883
O75400;O75400-2;O75400-3	O75400;O75400-2;O75400-3	PR40A_HUMAN	PRPF40A	Pre-mRNA-processing factor 40 homolog A			11095.9	2979.23	22194.7	26649.2
O75419;O75419-2;O75419-3	O75419;O75419-2;O75419-3	CDC45_HUMAN	CDC45	Cell division control protein 45 homolog	22367.3	27369.4	15784	16074.4		7399.41
O75436	O75436	VP26A_HUMAN	VPS26A	Vacuolar protein sorting-associated protein 26A	377657	395486	331242	241639	217677	229729
O75439	O75439	MPPB_HUMAN	PMPCB	Mitochondrial-processing peptidase subunit beta	114463	134509	125188	69129.3	71754.6	83990.7
O75467;Q6AW86	O75467;Q6AW86	Z324A_HUMAN;Z324B_HUMAN	ZNF324;ZNF324B	Zinc finger protein 324A	93989.6	110747	110856	209894	136217	150763
O75475;O75475-2;O75475-3;P51858;Q7Z4V5;Q7Z4V5-2;Q7Z4V5-3;Q7Z4V5-4;Q9Y3E1	O75475;P51858;Q7Z4V5;Q9Y3E1;O75475-2;O75475-3;Q7Z4V5-2;Q7Z4V5-3;Q7Z4V5-4	HDGF_HUMAN;HDGR2_HUMAN;HDGR3_HUMAN;PSIP1_HUMAN	HDGF;HDGFL2;HDGFL3;PSIP1	PC4 and SFRS1-interacting protein	58585.2	64325.3	31323.9	39450.2	55255.7	51631
O75494;O75494-2;O75494-3;O75494-4;O75494-5;O75494-6	O75494;O75494-2;O75494-3;O75494-4;O75494-5;O75494-6	SRS10_HUMAN	SRSF10	Serine/arginine-rich splicing factor 10	340707	339729	411365	448957	541365	511863
O75533	O75533	SF3B1_HUMAN	SF3B1	Splicing factor 3B subunit 1	51754.3	51727.3	41676.9	83112.9	103853	103309
O75534;O75534-2;O75534-3;O75534-4	O75534;O75534-2;O75534-3;O75534-4	CSDE1_HUMAN	CSDE1	Cold shock domain-containing protein E1	201006	204879	230705	215872	239287	228413
O75569;O75569-2;O75569-3	O75569;O75569-2;O75569-3	PRKRA_HUMAN	PRKRA	Interferon-inducible double-stranded RNA-dependent protein kinase activator A	30820.1	55464.4	29776.5	76745.7	79770.7	103157
O75600;O75600-2	O75600;O75600-2	KBL_HUMAN	GCAT	2-amino-3-ketobutyrate coenzyme A ligase, mitochondrial				20871.1	15875.9	18613.2
O75607	O75607	NPM3_HUMAN	NPM3	Nucleoplasmin-3	30950.1	29334.4	46886.4	53180.5	71440.5	36116.8
O75608;O75608-2	O75608;O75608-2	LYPA1_HUMAN	LYPLA1	Acyl-protein thioesterase 1	78237.8		125823	161248	138644	158555
O75629	O75629	CREG1_HUMAN	CREG1	Protein CREG1	30907.3			8415.81
O75643	O75643	U520_HUMAN	SNRNP200	U5 small nuclear ribonucleoprotein 200 kDa helicase	106016	106020	98650.5	140308	131621	127431
O75663	O75663	TIPRL_HUMAN	TIPRL	TIP41-like protein	118736	126580	115708	92883.1	88781.6	83823
O75717;O75717-2	O75717;O75717-2	WDHD1_HUMAN	WDHD1	WD repeat and HMG-box DNA-binding protein 1	18129.2	13594.1	15772.9	10512.3	18491	19501.7
O75792	O75792	RNH2A_HUMAN	RNASEH2A	Ribonuclease H2 subunit A	23629.2	24795.5	25669.5	99640.3	63792.1	70800
O75818;O75818-2	O75818;O75818-2	RPP40_HUMAN	RPP40	Ribonuclease P protein subunit p40	23458.4	24936.2		10632.5
O75821	O75821	EIF3G_HUMAN	EIF3G	Eukaryotic translation initiation factor 3 subunit G	185345	188207	181168	145551	138303	138791
O75832;O75832-2	O75832;O75832-2	PSD10_HUMAN	PSMD10	26S proteasome non-ATPase regulatory subunit 10	30322.1	42132.9	42780.1	119902	115369	115104
O75874	O75874	IDHC_HUMAN	IDH1	Isocitrate dehydrogenase [NADP] cytoplasmic	356316	358333	346656	390495	453130	414174
O75935;O75935-2	O75935;O75935-2	DCTN3_HUMAN	DCTN3	Dynactin subunit 3				18766.9	26273.2	24246.9
O76003	O76003	GLRX3_HUMAN	GLRX3	Glutaredoxin-3	22442	30138.3		372937	282397	301628
O76013;O76013-2;Q14532	O76013;O76013-2;Q14532	K1H2_HUMAN;KRT36_HUMAN	KRT32;KRT36	Keratin, type I cuticular Ha6	246171	377115	320847	389103	411794	189094
O76024	O76024	WFS1_HUMAN	WFS1	Wolframin	13582.8	11390.3
O76027	O76027	ANXA9_HUMAN	ANXA9	Annexin A9	4399.67			123956	58696.3	82218.8
O76031	O76031	CLPX_HUMAN	CLPX	ATP-dependent Clp protease ATP-binding subunit clpX-like, mitochondrial				32384.4	8236.87	18437.4
O76071	O76071	CIAO1_HUMAN	CIAO1	Probable cytosolic iron-sulfur protein assembly protein CIAO1	287312	272945	226200	93608.1	84569.3	96063.6
O76094;O76094-2	O76094;O76094-2	SRP72_HUMAN	SRP72	Signal recognition particle subunit SRP72	75560.6	82679.5	82572.8	90337.1	79697.5	69335.5
O94762;O94762-2;O94762-3;O94762-4	O94762;O94762-2;O94762-3;O94762-4	RECQ5_HUMAN	RECQL5	ATP-dependent DNA helicase Q5	79605.1	86468.2	116101	72130	102857	78316.4
O94776	O94776	MTA2_HUMAN	MTA2	Metastasis-associated protein MTA2	39796.5	30624.5	18764.4	34262.5	28622.9	26034.1
O94782	O94782	UBP1_HUMAN	USP1	Ubiquitin carboxyl-terminal hydrolase 1	126136	144417	172660
O94874;O94874-2;O94874-3	O94874;O94874-2;O94874-3	UFL1_HUMAN	UFL1	E3 UFM1-protein ligase 1				19329.3	14154.2
O94888	O94888	UBXN7_HUMAN	UBXN7	UBX domain-containing protein 7				43330.7	38861	46295.4
O94906;O94906-2	O94906;O94906-2	PRP6_HUMAN	PRPF6	Pre-mRNA-processing factor 6		14285.8		23935.6		15865.2
O94925-3	O94925;O94925-3	GLSK_HUMAN	GLS	Isoform 3 of Glutaminase kidney isoform, mitochondrial			7751.95	25549.1	18648.6	32574.6
O94952;O94952-1	O94952;O94952-1	FBX21_HUMAN	FBXO21	F-box only protein 21	7503.02			25845.6	28494.7	54656.1
O94966-2	O94966-2;O94966-4	UBP19_HUMAN	USP19	Isoform 2 of Ubiquitin carboxyl-terminal hydrolase 19	22299.5	20263.7
O94966-5	O94966;O94966-2;O94966-3;O94966-4;O94966-5;O94966-6;O94966-7	UBP19_HUMAN	USP19	Isoform 5 of Ubiquitin carboxyl-terminal hydrolase 19	3130000	3250000	3780000	206547	207708	225215
O94973;O94973-2;O94973-3	O94973;O94973-2;O94973-3	AP2A2_HUMAN	AP2A2	AP-2 complex subunit alpha-2	68394.1	79932.6	85944	142359	142508	147926
O94979;O94979-2;O94979-3;O94979-8;O94979-9	O94979;O94979-10;O94979-2;O94979-3;O94979-4;O94979-5;O94979-6;O94979-7;O94979-8;O94979-9	SC31A_HUMAN	SEC31A	Protein transport protein Sec31A	259388	248726	233782	254919	233111	232329
O95071;O95071-2	O95071;O95071-2	UBR5_HUMAN	UBR5	E3 ubiquitin-protein ligase UBR5	11430.1	8678.92
O95155;O95155-2;O95155-3;O95155-4	O95155;O95155-2;O95155-3;O95155-4	UBE4B_HUMAN	UBE4B	Ubiquitin conjugation factor E4 B	14795.2	18563.9		37449.6	36086.8	16021.4
O95163	O95163	ELP1_HUMAN	ELP1	Elongator complex protein 1	66520.5	72106.7	65458.6	51791.5	42118.2	43297.7
O95197;O95197-2;O95197-3;O95197-4;O95197-7	O95197;O95197-3;O95197-2;O95197-4;O95197-7	RTN3_HUMAN	RTN3	Reticulon-3			16206.5	86471.6	69449	146012
O95218;O95218-2	O95218;O95218-2	ZRAB2_HUMAN	ZRANB2	Zinc finger Ran-binding domain-containing protein 2	211119	221475	216394	146066	134945	223537
O95219;O95219-2	O95219;O95219-2	SNX4_HUMAN	SNX4	Sorting nexin-4				26860.7	27162.5	20750.7
O95340;O95340-2	O95340;O95340-2	PAPS2_HUMAN	PAPSS2	Bifunctional 3'-phosphoadenosine 5'-phosphosulfate synthase 2	449501	421215	449579	406227	324328	342573
O95347;O95347-2	O95347;O95347-2	SMC2_HUMAN	SMC2	Structural maintenance of chromosomes protein 2	74523.4	92827.1	100224	160481	143946	139656
O95352;O95352-2;O95352-3	O95352;O95352-2;O95352-3	ATG7_HUMAN	ATG7	Ubiquitin-like modifier-activating enzyme ATG7	18490.4	39134.4	30020.7	43580.4	20860.6
O95361	O95361;O95361-2;Q309B1	TRI16_HUMAN	TRIM16	Tripartite motif-containing protein 16	92891.2	79664.3	102701	82042.1	73229	95283.8
O95372	O95372	LYPA2_HUMAN	LYPLA2	Acyl-protein thioesterase 2			58575.8	76289.3	70993.8	44123.2
O95373	O95373	IPO7_HUMAN	IPO7	Importin-7	318986	379963	380079	724666	691419	707605
O95394;O95394-3;O95394-4	O95394;O95394-3;O95394-4	AGM1_HUMAN	PGM3	Phosphoacetylglucosamine mutase	70801.2	70251.9	92894.9	48336.6	51320.9	36285
O95396	O95396	MOCS3_HUMAN	MOCS3	Adenylyltransferase and sulfurtransferase MOCS3	110362	103156	101946	133860	100047	97904.4
O95425;O95425-2;O95425-3;O95425-4	O95425;O95425-2;O95425-3;O95425-4	SVIL_HUMAN	SVIL	Supervillin	11725.4	21229.1	18885.2	40948.4	23988.9	15808.9
O95429;O95429-2	O95429;O95429-2	BAG4_HUMAN	BAG4	BAG family molecular chaperone regulator 4	15485.2	21698.3	23574.3			8000.18
O95433	O95433	AHSA1_HUMAN	AHSA1	Activator of 90 kDa heat shock protein ATPase homolog 1	373708	388551	415507	452457	353968	340463
O95452	O95452	CXB6_HUMAN	GJB6	Gap junction beta-6 protein	77420.5	52592.7	35049.2
O95453;O95453-2;O95453-3	O95453;O95453-2;O95453-3;O95453-4	PARN_HUMAN	PARN	Poly(A)-specific ribonuclease PARN	79939.6	91795.5	83897.6	108250	112482	103710
O95456;O95456-2	O95456;O95456-2	PSMG1_HUMAN	PSMG1	Proteasome assembly chaperone 1	94760	109901	93697.8	57725	56112.1	46388.3
O95486	O95486;O95486-2	SC24A_HUMAN	SEC24A	Protein transport protein Sec24A	78017.9	86024.9	79056	79516.3	85575.7	81838
O95487;O95487-2;O95487-3	O95487;O95487-2;O95487-3	SC24B_HUMAN	SEC24B	Protein transport protein Sec24B	36855.7	29734.1	49986.7	40134.4	59501.5	62747.3
O95671;O95671-2;O95671-3	O95671;O95671-2;O95671-3	ASML_HUMAN	ASMTL	Probable bifunctional dTTP/UTP pyrophosphatase/methyltransferase protein	117695	123635	147007	137702	104659	105096
O95685	O95685	PPR3D_HUMAN	PPP1R3D	Protein phosphatase 1 regulatory subunit 3D	94861.6	117010	95771.2	30981.6	18843.3	27589.5
O95747	O95747	OXSR1_HUMAN	OXSR1	Serine/threonine-protein kinase OSR1	34319.9	24631.1	22750.7	95102.7	54538.5	49057.4
O95758;O95758-1;O95758-2;O95758-4;O95758-5;O95758-6;O95758-7	O95758;O95758-1;O95758-2;O95758-4;O95758-5;O95758-6;O95758-7	PTBP3_HUMAN	PTBP3	Polypyrimidine tract-binding protein 3	129972	112118	116467	264192	213537	201977
O95777	O95777	LSM8_HUMAN	LSM8	U6 snRNA-associated Sm-like protein LSm8	45554.9	33271.8	21590.3	39385.5	34660.4	33736.5
O95782;O95782-2	O95782;O95782-2	AP2A1_HUMAN	AP2A1	AP-2 complex subunit alpha-1	953833	916341	1000000	1530000	1410000	1500000
O95793;O95793-2	O95793;O95793-2;O95793-3	STAU1_HUMAN	STAU1	Double-stranded RNA-binding protein Staufen homolog 1	156333	161077	208087	195525	185798	247990
O95817	O95817	BAG3_HUMAN	BAG3	BAG family molecular chaperone regulator 3	11608.1			37564.1	36907.5	32058
O95822;O95822-2	O95822;O95822-2	DCMC_HUMAN	MLYCD	Malonyl-CoA decarboxylase, mitochondrial		27669.3			11823.4
O95831;O95831-3	O95831;O95831-3;O95831-5;O95831-2	AIFM1_HUMAN	AIFM1	Apoptosis-inducing factor 1, mitochondrial	368168	452478	464953	349199	372938	194040
O95833	O95833	CLIC3_HUMAN	CLIC3	Chloride intracellular channel protein 3				65732.5	36633.3	39949.2
O95834;O95834-2;O95834-3	O95834;O95834-2;O95834-3	EMAL2_HUMAN	EML2	Echinoderm microtubule-associated protein-like 2	108877	100412	97759.6	52512.1	58420.2	60749
O95837;P29992;P50148	O95837;P29992;P50148	GNA11_HUMAN;GNA14_HUMAN;GNAQ_HUMAN	GNA11;GNA14;GNAQ	Guanine nucleotide-binding protein subunit alpha-14	25946.9	31991.4	24085	27094.6	17544.3	27522.7
O95848	O95848	NUD14_HUMAN	NUDT14	Uridine diphosphate glucose pyrophosphatase NUDT14	39682.5	50828	44256.4	11630.1	26818.9	20284.8
O95861;O95861-3	O95861;O95861-3;O95861-4	BPNT1_HUMAN	BPNT1	3'(2'),5'-bisphosphate nucleotidase 1	135488	128074	147416	105932	107845	104432
O95989	O95989	NUDT3_HUMAN	NUDT3	Diphosphoinositol polyphosphate phosphohydrolase 1	33960.3	81205.8	65951.7	56580.4	38255.7	28780.1
O95994	O95994	AGR2_HUMAN	AGR2	Anterior gradient protein 2 homolog	618104	585487	668930	2570000	2050000	2310000
O96008;O96008-2	O96008;O96008-2	TOM40_HUMAN	TOMM40	Mitochondrial import receptor subunit TOM40 homolog	109933	122332	123319	125273	115098	122586
O96013;O96013-2;O96013-3;O96013-4	O96013;O96013-2;O96013-3;O96013-4	PAK4_HUMAN	PAK4	Serine/threonine-protein kinase PAK 4				21618
O96019	O96019	ACL6A_HUMAN	ACTL6A	Actin-like protein 6A	328302	302028	325213	187851	206627	162022
P00338;P00338-3	P00338;P00338-3;P00338-4	LDHA_HUMAN	LDHA	L-lactate dehydrogenase A chain	1950000	1770000	1960000	734469	810248	667160
P00367	P00367;P49448;P00367-3	DHE3_HUMAN	GLUD1	Glutamate dehydrogenase 1, mitochondrial	667478	652958	710852	318185	381862	269131
P00374;P00374-2	P00374;Q86XF0;P00374-2	DYR_HUMAN	DHFR	Dihydrofolate reductase	131129	149696	157419	96942	100610	83030.7
P00387;P00387-2;P00387-3	P00387;P00387-2;P00387-3	NB5R3_HUMAN	CYB5R3	NADH-cytochrome b5 reductase 3	236889	252606	229499	138236	171902	124997
P00390;P00390-2;P00390-3	P00390;P00390-2;P00390-3;P00390-4;P00390-5	GSHR_HUMAN	GSR	Glutathione reductase, mitochondrial	618240	675253	714673	130061	158692	131038
P00403	P00403	COX2_HUMAN	MT-CO2	Cytochrome c oxidase subunit 2	72483.8	80290.4	81978.9	61657.9	57619	62018.9
P00441	P00441	SODC_HUMAN	SOD1	Superoxide dismutase [Cu-Zn]	267558	307915	358850	185450	184478	167730
P00450	P00450	CERU_HUMAN	CP	Ceruloplasmin	119814	146640	174224	242715	291476	305878
P00491	P00491	PNPH_HUMAN	PNP	Purine nucleoside phosphorylase	493328	509804	534362	319007	361528	299013
P00492	P00492	HPRT_HUMAN	HPRT1	Hypoxanthine-guanine phosphoribosyltransferase	198441	194928	182751	160315	166310	142790
P00505;P00505-2	P00505;P00505-2	AATM_HUMAN	GOT2	Aspartate aminotransferase, mitochondrial	118637	106419	123862	73761.2	90559.5	92669.2
P00558	P00558;P00558-2	PGK1_HUMAN	PGK1	Phosphoglycerate kinase 1	576798	606917	660109	1540000	1870000	1610000
P00568	P00568	KAD1_HUMAN	AK1	Adenylate kinase isoenzyme 1		99281.1	156883	378906	383362	428328
P00738;P00738-2	P00738;P00738-2	HPT_HUMAN	HP	Haptoglobin	130164	152250	250455	302362	386916	356822
P00918	P00918	CAH2_HUMAN	CA2	Carbonic anhydrase 2	745448	629691	719526	504933	563601	530727
P00966	P00966	ASSY_HUMAN	ASS1	Argininosuccinate synthase	370500	352603	343841	222650	238455	217804
P01040	P01040	CYTA_HUMAN	CSTA	Cystatin-A	40739.3	37948.8		77144.1
P01111	P01111;P01116;P01116-2	RASN_HUMAN	NRAS	GTPase NRas	201761	192369	191619	62935.5	85547.1	61131.3
P01834	P01834;P0DOX7	IGKC_HUMAN	IGKC	Immunoglobulin kappa constant	79999.4	107685	84177.3	135623	134870	129406
P01857;P01857-1;P01860;P01860-1	P01857;P01860;P0DOX5;P01857-1;P01860-1	IGHG1_HUMAN;IGHG3_HUMAN	IGHG1;IGHG3	Immunoglobulin heavy constant gamma 1	318812	340623	358896	461537	406975	574920
P01859;P01859-1	P01859;P01859-1	IGHG2_HUMAN	IGHG2	Immunoglobulin heavy constant gamma 2	2000000	1980000	2690000	2080000	2840000	2360000
P02008;P69905	P02008;P69905	HBAZ_HUMAN;HBA_HUMAN	HBA1;HBZ	Hemoglobin subunit zeta		13272.2		31533.2	10834.2	8189.51
P02042;P68871	P02042;P68871	HBB_HUMAN;HBD_HUMAN	HBB;HBD	Hemoglobin subunit delta	99984.8	93660.7		150659	110257	120274
P02533	P02533	K1C14_HUMAN	KRT14	Keratin, type I cytoskeletal 14	338722	489310	343886	573543	631255	391644
P02538	O95678;P02538;P48668	K2C6A_HUMAN	KRT6A	Keratin, type II cytoskeletal 6A	142499	122974	222716	206624	491800	340221
P02545;P02545-2;P02545-3;P02545-6	P02545;P02545-2;P02545-3;P02545-4;P02545-5;P02545-6	LMNA_HUMAN	LMNA	Prelamin-A/C	25670	54509.8	42780.2	101886	76345.8	88522.4
P02675	P02675	FIBB_HUMAN	FGB	Fibrinogen beta chain	26099.8	35998.8	36599.9	30899.9	22851.5	40708.3
P02686;P02686-3;P02686-4;P02686-5;P02686-6	P02686;P02686-3;P02686-4;P02686-5;P02686-6	MBP_HUMAN	MBP	Myelin basic protein	31849.2	38641.8	27232.2	40815.1	35844.5	58436.6
P02768	P02768	ALBU_HUMAN	ALB	Albumin	482042	542854	725166	1250000	1470000	1400000
P02786	P02786	TFR1_HUMAN	TFRC	Transferrin receptor protein 1	135612	147056	140916	124648	122291	98022.7
P02787	P02787	TRFE_HUMAN	TF	Serotransferrin	349585	349423	445399	674873	795530	778070
P02788;P02788-2	P02788;P02788-2	TRFL_HUMAN	LTF	Lactotransferrin	99301.3	68337	101222	79104	80236	120239
P02790	P02790	HEMO_HUMAN	HPX	Hemopexin	106571	137212	161223	219115	224535	234998
P02792	P02792	FRIL_HUMAN	FTL	Ferritin light chain				30349.2	33832	25200
P02794	P02794	FRIH_HUMAN	FTH1	Ferritin heavy chain	208801	232107	261267	512512	731802	550481
P04040	P04040	CATA_HUMAN	CAT	Catalase	66079.5	74704	47805.3	106394	102711	58722.6
P04049;P04049-2;P10398	P04049;P10398;P15056;P04049-2	ARAF_HUMAN;RAF1_HUMAN	ARAF;RAF1	RAF proto-oncogene serine/threonine-protein kinase	79035.9	93087.4	85456.3	53143.1	24401.7
P04062;P04062-2;P04062-3;P04062-4;P04062-5	P04062;P04062-2;P04062-3;P04062-4;P04062-5	GBA1_HUMAN	GBA1	Lysosomal acid glucosylceramidase	24890.8	40093.9		60242.2	72615.1	80716.7
P04066	P04066	FUCO_HUMAN	FUCA1	Tissue alpha-L-fucosidase	43952.4	55817.8	69082.1	69969.6	112133	74151
P04075	P04075;P05062;P09972;P04075-2	ALDOA_HUMAN	ALDOA	Fructose-bisphosphate aldolase A	5740000	5730000	6360000	2300000	2490000	2310000
P04080	P04080	CYTB_HUMAN	CSTB	Cystatin-B	189387	212621	218523	210565	224455	176148
P04181	P04181	OAT_HUMAN	OAT	Ornithine aminotransferase, mitochondrial	48843.1	45862.9	42967.1	18452.2	26450.2	31190.7
P04216	P04216	THY1_HUMAN	THY1	Thy-1 membrane glycoprotein	66060.2	80540.8	92507.3	108018	66157.2	121109
P04259	P04259;P48668	K2C6B_HUMAN	KRT6B	Keratin, type II cytoskeletal 6B	31204.4	34130.7	67372.3	45878.4	176452	125568
P04264	P04259;P04264	K2C1_HUMAN	KRT1	Keratin, type II cytoskeletal 1	8020000	12900000	8850000	15900000	10100000	6030000
P04406	P04406;P04406-2	G3P_HUMAN	GAPDH	Glyceraldehyde-3-phosphate dehydrogenase	25100000	21700000	34600000	14800000	17800000	11000000
P04424;P04424-2;P04424-3	P04424;P04424-2;P04424-3	ARLY_HUMAN	ASL	Argininosuccinate lyase	53938.3	52140	56245.8	72968.6	76405.6	64823.3
P04439;P04439-2	P04439;P04439-2	HLAA_HUMAN	HLA-A	HLA class I histocompatibility antigen, A alpha chain	57492.5	36938	52516.7	39205.8	26260.5	42949
P04632	P04632;Q96L46	CPNS1_HUMAN	CAPNS1	Calpain small subunit 1	38287.3	57500.8	38648.2	137515	194189	165290
P04792	P04792	HSPB1_HUMAN	HSPB1	Heat shock protein beta-1	5770000	5980000	6000000	3950000	4110000	3560000
P04818;P04818-2	P04818;P04818-2	TYSY_HUMAN	TYMS	Thymidylate synthase	29951.5	31237.9	35345.7	27296.5	24142.1
P04843	P04843	RPN1_HUMAN	RPN1	Dolichyl-diphosphooligosaccharide--protein glycosyltransferase subunit 1	716016	685715	669110	569732	583112	425379
P04844;P04844-2	P04844;P04844-2	RPN2_HUMAN	RPN2	Dolichyl-diphosphooligosaccharide--protein glycosyltransferase subunit 2	90863	89290.7	67840.9	55130.7	48051.8	47293.6
P05023;P05023-3;P05023-4	P05023;P05023-2;P05023-3;P05023-4	AT1A1_HUMAN	ATP1A1	Sodium/potassium-transporting ATPase subunit alpha-1	130395	134409	156440	182398	151179	197415
P05026;P05026-2	P05026;P05026-2	AT1B1_HUMAN	ATP1B1	Sodium/potassium-transporting ATPase subunit beta-1	155822	154829	187591	195293	172785	205352
P05109	P05109	S10A8_HUMAN	S100A8	Protein S100-A8	20255.1	21426.1	15573.2	53889.7	35351.7	38818.7
P05141	P05141;P12235;P12236;Q9H0C2	ADT2_HUMAN	SLC25A5	ADP/ATP translocase 2	720244	738629	685435	698702	529605	547912
P05161	P05161	ISG15_HUMAN	ISG15	Ubiquitin-like protein ISG15	253140	259483	213672	375010	268103	215483
P05165;P05165-2;P05165-3	P05165;P05165-2;P05165-3	PCCA_HUMAN	PCCA	Propionyl-CoA carboxylase alpha chain, mitochondrial	31643	24474.4	30359.5	19831.8	25915.8
P05186;P05186-2;P05186-3	P05186;P05186-2;P05186-3	PPBT_HUMAN	ALPL	Alkaline phosphatase, tissue-nonspecific isozyme			12896.9	35256.5	48900.3	47757.3
P05198	P05198	IF2A_HUMAN	EIF2S1	Eukaryotic translation initiation factor 2 subunit 1	334487	323495	335927	208898	222113	198079
P05386	P05386	RLA1_HUMAN	RPLP1	Large ribosomal subunit protein P1				69362.7	47553.2	57417.3
P05388	P05388;Q8NHW5;P05388-2	RLA0_HUMAN	RPLP0	Large ribosomal subunit protein uL10	218657	246304	289852	333043	373926	313391
P05455	P05455	LA_HUMAN	SSB	Lupus La protein	85762.9	99369.5	109783	110831	132078	132328
P05783	P05783	K1C18_HUMAN	KRT18	Keratin, type I cytoskeletal 18	1420000	1500000	2060000	1730000	2150000	834656
P05787;P05787-2	P05787;P05787-2	K2C8_HUMAN	KRT8	Keratin, type II cytoskeletal 8	2420000	2190000	3210000	2790000	3080000	1360000
P06280	P06280	AGAL_HUMAN	GLA	Alpha-galactosidase A	93579.1	93418.7	101829	61962.2	66813.2	42827.8
P06396-2	P06396;P06396-2;P06396-3;P06396-4	GELS_HUMAN	GSN	Isoform 2 of Gelsolin	409521	395521	426655	590573	599743	537492
P06454;P06454-2	P06454;P06454-2	PTMA_HUMAN	PTMA	Prothymosin alpha	67485.8	75052.6	56726.4	37007.1	66533.2	60070.1
P06493	P06493	CDK1_HUMAN	CDK1	Cyclin-dependent kinase 1	70618.1	64880.3	80431.6	114766	119517	128669
P06576	P06576	ATPB_HUMAN	ATP5F1B	ATP synthase subunit beta, mitochondrial	240903	254429	266619	222944	250272	246235
P06702	P06702	S10A9_HUMAN	S100A9	Protein S100-A9	46110.6	47959.4	46247.1	118943	69367.7	67703.3
P06730;P06730-2;P06730-3	P06730;P06730-2;P06730-3	IF4E_HUMAN	EIF4E	Eukaryotic translation initiation factor 4E	100003	92243	117204	172036	175636	161035
P06733	P06733;P06733-2	ENOA_HUMAN	ENO1	Alpha-enolase	2370000	2220000	2260000	1990000	2130000	1890000
P06737;P06737-2	P06737;P06737-2	PYGL_HUMAN	PYGL	Glycogen phosphorylase, liver form	36191.4	32482.2	44215.5		17424
P06744;P06744-2	P06744;P06744-2	G6PI_HUMAN	GPI	Glucose-6-phosphate isomerase	311664	329146	320859	262108	323730	249536
P06748;P06748-2;P06748-3	P06748;P06748-2;P06748-3	NPM_HUMAN	NPM1	Nucleophosmin	225294	243642	271916	534646	544813	624481
P06753-2;P06753-5	P06753;P06753-2;P06753-3;P06753-4;P06753-5;P06753-6;P06753-7	TPM3_HUMAN	TPM3	Isoform 2 of Tropomyosin alpha-3 chain	35636.5	42040.6	46347.9	119051	102689	99846.2
P06865	P06865	HEXA_HUMAN	HEXA	Beta-hexosaminidase subunit alpha	87139.2	82923.7	78462	55076.5	64219.5	39787.3
P07099	P07099	HYEP_HUMAN	EPHX1	Epoxide hydrolase 1	19339.6	29045.6	21705.1		17550.5
P07195	P07195	LDHB_HUMAN	LDHB	L-lactate dehydrogenase B chain	88757.9	90478.6	101677	145028	87296.4	157433
P07237	P07237	PDIA1_HUMAN	P4HB	Protein disulfide-isomerase	222812	238768	227844	404046	419307	424091
P07339	P07339	CATD_HUMAN	CTSD	Cathepsin D	1370000	1210000	1310000	1040000	1070000	765945
P07355;P07355-2	A6NMY6;P07355;P07355-2	ANXA2_HUMAN	ANXA2	Annexin A2	143775	143909	120361	264455	252413	244820
P07384	P07384	CAN1_HUMAN	CAPN1	Calpain-1 catalytic subunit	887021	880207	861821	565176	586097	529631
P07437	P04350;P07437;P68371	TBB5_HUMAN	TUBB	Tubulin beta chain	10100000	9070000	10300000	16200000	10900000	11600000
P07477	P07477;Q9BYE2;Q9BYE2-2;Q9BYE2-3;Q9BYE2-6	TRY1_HUMAN	PRSS1	Serine protease 1	7890000	9180000	9410000	10500000	9760000	9780000
P07686	P07686	HEXB_HUMAN	HEXB	Beta-hexosaminidase subunit beta	201486	169335	180845	98219.3	106558	83912
P07737	P07737	PROF1_HUMAN	PFN1	Profilin-1	1760000	1820000	1950000	1430000	1640000	1270000
P07741;P07741-2	P07741;P07741-2	APT_HUMAN	APRT	Adenine phosphoribosyltransferase	507264	533889	532968	452381	592109	542841
P07814	P07814	SYEP_HUMAN	EPRS1	Bifunctional glutamate/proline--tRNA ligase	203089	217677	222443	328330	360523	360283
P07858	P07858	CATB_HUMAN	CTSB	Cathepsin B	29953.7	28593.6	43790.2	39886
P07900;P07900-2	P07900;P07900-2	HS90A_HUMAN	HSP90AA1	Heat shock protein HSP 90-alpha	2380000	2440000	2550000	2730000	2440000	2240000
P07910;P07910-2	P07910;P07910-2;P07910-3;P07910-4	HNRPC_HUMAN	HNRNPC	Heterogeneous nuclear ribonucleoproteins C1/C2	427993	554751	779999	761629	1060000	1000000
P07954;P07954-2	P07954;P07954-2	FUMH_HUMAN	FH	Fumarate hydratase, mitochondrial	10321.5			22716	14418.1
P08133;P08133-2	P08133;P08133-2	ANXA6_HUMAN	ANXA6	Annexin A6	78195	89349.6	72530.1	162902	198335	161686
P08195;P08195-2;P08195-3;P08195-4;P08195-5	P08195;P08195-4;P08195-2;P08195-3;P08195-5	4F2_HUMAN	SLC3A2	4F2 cell-surface antigen heavy chain	76267.5	65585.9	64377	117865	135386	100676
P08236;P08236-2;P08236-3	P08236;P08236-2;P08236-3	BGLR_HUMAN	GUSB	Beta-glucuronidase	43546.4	40605.7	40515	27142	45176.3	33904.6
P08237;P08237-3	P08237;P08237-2;P08237-3	PFKAM_HUMAN	PFKM	ATP-dependent 6-phosphofructokinase, muscle type	113018	132194	130965	71126.6	82232.3	65813.7
P08238	P07900;P08238;Q14568;Q58FF8;P07900-2	HS90B_HUMAN	HSP90AB1	Heat shock protein HSP 90-beta	3090000	3130000	3510000	4680000	4190000	4160000
P08243;P08243-2;P08243-3	P08243;P08243-2;P08243-3	ASNS_HUMAN	ASNS	Asparagine synthetase [glutamine-hydrolyzing]	187146	200291	222557	180685	182264	186651
P08397;P08397-2	P08397;P08397-2;P08397-3;P08397-4	HEM3_HUMAN	HMBS	Porphobilinogen deaminase	39094.7	41090.6	34244.8	69052.7	57779.2	55465
P08559;P08559-2;P08559-3;P08559-4	P08559;P29803;P08559-2;P08559-3;P08559-4	ODPA_HUMAN	PDHA1	Pyruvate dehydrogenase E1 component subunit alpha, somatic form, mitochondrial	63200.5	69171.9	67959.2	48574.3	47418.4	48642.5
P08574	P08574	CY1_HUMAN	CYC1	Cytochrome c1, heme protein, mitochondrial	24553.3	23090.5	32455.3	7478.98	10787.8
P08621;P08621-2	P08621;P08621-2;P08621-3	RU17_HUMAN	SNRNP70	U1 small nuclear ribonucleoprotein 70 kDa	71646.9	93284.3	89070.8	65081.8	76940.1	80590.5
P08708	P08708	RS17_HUMAN	RPS17	Small ribosomal subunit protein eS17	124260	151197	133001	121608	121334	94214.9
P08727	P02533;P08727;P08779;P19012;Q04695;P19012-2	K1C19_HUMAN	KRT19	Keratin, type I cytoskeletal 19	1890000	1960000	2390000	2280000	3020000	1370000
P08754	P08754	GNAI3_HUMAN	GNAI3	Guanine nucleotide-binding protein G(i) subunit alpha-3	51666.2	65143.4	65950.7	29078.1	29753.6
P08758	P08758	ANXA5_HUMAN	ANXA5	Annexin A5	93872.9	91325.1	81740.8	171525	204700	168228
P08779	P08779	K1C16_HUMAN	KRT16	Keratin, type I cytoskeletal 16	217522	205473	337861	265371	788131	469525
P08865	P08865;A0A8I5KQE6	RSSA_HUMAN	RPSA	Small ribosomal subunit protein uS2	152334	166996	148258	126318	138675	123544
P09001	P09001	RM03_HUMAN	MRPL3	Large ribosomal subunit protein uL3m	51408.5	64607.7	49484	18501.4	44968.5
P09132	P09132	SRP19_HUMAN	SRP19	Signal recognition particle 19 kDa protein	47790.7	29325.1	51845.5	28758		19739.2
P09211	P09211	GSTP1_HUMAN	GSTP1	Glutathione S-transferase P	44922	49092.2	61485	120916	149610	127841
P09382	P09382	LEG1_HUMAN	LGALS1	Galectin-1	72162.5	70324	85598.9	115728	125866	118282
P09429	P09429	HMGB1_HUMAN	HMGB1	High mobility group protein B1	106638	123447	118285	798176	880453	849680
P09467	O00757;P09467	F16P1_HUMAN	FBP1	Fructose-1,6-bisphosphatase 1	1300000	1190000	1340000	834636	927406	801024
P09471;P09471-2	P09471;P09471-2	GNAO_HUMAN	GNAO1	Guanine nucleotide-binding protein G(o) subunit alpha	211271	235883	234490	220979	211162	233453
P09496;P09496-2;P09496-3;P09496-4	P09496;P09496-2;P09496-3;P09496-4	CLCA_HUMAN	CLTA	Clathrin light chain A	36709.4	33551.5	36086.5	60191.6	58976.9	63191.4
P09525;P09525-2;P09525-3	P09525;P09525-2;P09525-3	ANXA4_HUMAN	ANXA4	Annexin A4	26977.1	39477.4	42520	67694.8	69765	62474.4
P09543;P09543-2	P09543;P09543-2	CN37_HUMAN	CNP	2',3'-cyclic-nucleotide 3'-phosphodiesterase	29042.1	24612.6	21899.5	38032.3	23718.1	27433.1
P09622	P09622;P09622-2;P09622-3	DLDH_HUMAN	DLD	Dihydrolipoyl dehydrogenase, mitochondrial	176182	148758	161394	73099.6	70197.4	60518.3
P09651;P09651-2;P09651-3	P09651;Q32P51;P09651-2;P09651-3	ROA1_HUMAN	HNRNPA1	Heterogeneous nuclear ribonucleoprotein A1	449993	438898	415683	1540000	1660000	1790000
P09661	P09661	RU2A_HUMAN	SNRPA1	U2 small nuclear ribonucleoprotein A'	53987.9	60055	78120.5	75082.7	81878.8	54051.3
P09848	P09848	LPH_HUMAN	LCT	Lactase/phlorizin hydrolase		27632.9
P09960;P09960-4	P09960;P09960-2;P09960-3;P09960-4	LKHA4_HUMAN	LTA4H	Leukotriene A-4 hydrolase	283906	242279	255988	183989	221191	192205
P09972	P09972	ALDOC_HUMAN	ALDOC	Fructose-bisphosphate aldolase C	375303	450819	467393	325372	341907	354634
P0C0S5;Q71UI9	P04908;P0C0S5;P0C0S8;P16104;P20671;Q16777;Q6FI13;Q71UI9;Q7L7L0;Q93077;Q96KK5;Q96QV6;Q99878;Q9BTM1;Q71UI9-2;Q71UI9-3;Q71UI9-4;Q9BTM1-2	H2AV_HUMAN;H2AZ_HUMAN	H2AZ1;H2AZ2	Histone H2A.Z	574894	583926	752577	761246	720146	823885
P0CG23	P0CG23	ZN853_HUMAN	ZNF853	Zinc finger protein 853	90525	116386	98712.6
P0CG47;P0CG48;P62979;P62987	P0CG47;P0CG48;P62979;P62987	RL40_HUMAN;RS27A_HUMAN;UBB_HUMAN;UBC_HUMAN	RPS27A;UBA52;UBB;UBC	Polyubiquitin-B	554000000	288000000	211000000	938000000	850000000	570000000
P0DMV8;P0DMV9	P0DMV8;P0DMV9;P17066;P48741;P0DMV8-2	HS71A_HUMAN;HS71B_HUMAN	HSPA1A;HSPA1B	Heat shock 70 kDa protein 1A	2500000	2190000	2410000	2540000	2680000	2370000
P0DP23;P0DP24;P0DP25;P27482	P0DP23;P0DP24;P0DP25;P27482	CALL3_HUMAN;CALM1_HUMAN;CALM2_HUMAN;CALM3_HUMAN	CALM1;CALM2;CALM3;CALML3	Calmodulin-1	64761.5	72294.1	74928.4	46747.6	51797.4	64850.6
P0DPD7;P0DPD8	P0DPD7;P0DPD8	EFCE2_HUMAN;EFMT4_HUMAN	EEF1AKMT4;EEF1AKMT4-ECE2	EEF1A lysine methyltransferase 4	98572.4	82543	69481	59590.7	36067.7	42033.9
P10155;P10155-3;P10155-4;P10155-5	P10155;P10155-3;P10155-4;P10155-5	RO60_HUMAN	RO60	RNA-binding protein RO60	60329.4	58374.3	52968.1	64821.6	56551.6	41876.2
P10253	P10253	LYAG_HUMAN	GAA	Lysosomal alpha-glucosidase	19966.1	33425.5
P10321;P10321-2	P10321;P10321-2	HLAC_HUMAN	HLA-C	HLA class I histocompatibility antigen, C alpha chain	42279.1	37378.2	37275.8			26846.3
P10412;P16402;P16403	P10412;P16402;P16403	H12_HUMAN;H13_HUMAN;H14_HUMAN	H1-2;H1-3;H1-4	Histone H1.4	34711.1	34333.4	44595.7	29984.1	35173	36999
P10515	P10515	ODP2_HUMAN	DLAT	Dihydrolipoyllysine-residue acetyltransferase component of pyruvate dehydrogenase complex, mitochondrial	29427.7	29567.9	50000.5	47423.1	50912.8	30247
P10586;P10586-2	P10586;P23468;Q13332;P10586-2;P23468-2;P23468-3;P23468-4;P23468-5;P23468-6;P23468-7;Q13332-2;Q13332-3;Q13332-4;Q13332-5;Q13332-6;Q13332-7	PTPRF_HUMAN	PTPRF	Receptor-type tyrosine-protein phosphatase F	55713.6	54623.5	47303.9	42856.7	56766.2	47863.5
P10599	P10599;P10599-2	THIO_HUMAN	TXN	Thioredoxin	411589	484503	701419	601720	583902	545913
P10620	P10620	MGST1_HUMAN	MGST1	Microsomal glutathione S-transferase 1	57236.7	83643.1	40837.5	24360.2
P10636;P10636-2;P10636-3;P10636-4;P10636-5;P10636-6;P10636-7;P10636-8;P10636-9	P10636;P10636-8;P10636-6;P10636-2;P10636-3;P10636-4;P10636-5;P10636-7;P10636-9	TAU_HUMAN	MAPT	Microtubule-associated protein tau		69550.6	62934.6	119277	126514	124216
P10644;P10644-2	P10644;P10644-2	KAP0_HUMAN	PRKAR1A	cAMP-dependent protein kinase type I-alpha regulatory subunit			182787	191097	233550	231572
P10768	P10768	ESTD_HUMAN	ESD	S-formylglutathione hydrolase	107647	74922.5	65086.6	445006	550534	630195
P10809	P10809	CH60_HUMAN	HSPD1	60 kDa heat shock protein, mitochondrial	174163	188534	164533	1810000	1690000	1790000
P10915	P10915	HPLN1_HUMAN	HAPLN1	Hyaluronan and proteoglycan link protein 1	7565.83		9394.44	22340.9	26342.9	17463.8
P11021	P11021	BIP_HUMAN	HSPA5	Endoplasmic reticulum chaperone BiP	630289	627612	704593	661691	713881	685794
P11142	P11142;P11142-2	HSP7C_HUMAN	HSPA8	Heat shock cognate 71 kDa protein	3880000	3570000	4000000	3890000	4530000	4320000
P11161;P11161-2	P11161;P11161-2	EGR2_HUMAN	EGR2	E3 SUMO-protein ligase EGR2	249352	220298	280944	214295	278870	276565
P11166	P11166	GTR1_HUMAN	SLC2A1	Solute carrier family 2, facilitated glucose transporter member 1	36544.6	31432	32160.5	16170	19744.2	32319.5
P11172	P11172;P11172-3	UMPS_HUMAN	UMPS	Uridine 5'-monophosphate synthase	64253.6	61664	51428.7	149166	113658	104899
P11177;P11177-2;P11177-3	P11177;P11177-2;P11177-3	ODPB_HUMAN	PDHB	Pyruvate dehydrogenase E1 component subunit beta, mitochondrial	40423.6	36751.2	56235.5			32370
P11216	P06737;P11216;P11217;P06737-2;P11217-2	PYGB_HUMAN	PYGB	Glycogen phosphorylase, brain form	319512	315513	283081	247857	298177	262162
P11233	P11233	RALA_HUMAN	RALA	Ras-related protein Ral-A	41878.6	44694.4	27204.6	29057.7	37326.9
P11234;P11234-2;P11234-3	P11233;P11234;P11234-2;P11234-3	RALB_HUMAN	RALB	Ras-related protein Ral-B	64859.5	41022.4	67541.2	51368.7	45448	35585.1
P11413;P11413-2;P11413-3	P11413;P11413-2;P11413-3	G6PD_HUMAN	G6PD	Glucose-6-phosphate 1-dehydrogenase	2970000	2880000	2940000	1710000	1880000	1770000
P11498	P11498;P11498-2	PYC_HUMAN	PC	Pyruvate carboxylase, mitochondrial	172713	165312	151226	144849	170901	169744
P11586	P11586	C1TC_HUMAN	MTHFD1	C-1-tetrahydrofolate synthase, cytoplasmic	337662	346015	347022	740305	813337	830879
P11766	P11766	ADHX_HUMAN	ADH5	Alcohol dehydrogenase class-3	397927	408921	477427	234598	280751	273232
P11802	P11802	CDK4_HUMAN	CDK4	Cyclin-dependent kinase 4	293323	295157	266210	165303	175957	145787
P11908;P11908-2	P11908;P11908-2	PRPS2_HUMAN	PRPS2	Ribose-phosphate pyrophosphokinase 2	62662.8	59970.5	57345	100707	94286.4	88149.6
P11940;P11940-2	P11940;Q9H361;P11940-2	PABP1_HUMAN	PABPC1	Polyadenylate-binding protein 1	291892	297861	356641	493218	506615	583419
P12004	P12004	PCNA_HUMAN	PCNA	Proliferating cell nuclear antigen	1290000	1170000	1450000	1200000	1310000	1250000
P12081;P12081-4	P12081;P49590;P12081-2;P12081-3;P12081-4;P49590-2	HARS1_HUMAN	HARS1	Histidine--tRNA ligase, cytoplasmic	230291	222629	210161	147109	158237	123277
P12268	P12268	IMDH2_HUMAN	IMPDH2	Inosine-5'-monophosphate dehydrogenase 2	145047	155380	189993	327757	372904	343348
P12429	P12429	ANXA3_HUMAN	ANXA3	Annexin A3	42599.7	49963.8	55679.9	39980.8	53272.9	40575
P12694;P12694-2	P12694;P12694-2	ODBA_HUMAN	BCKDHA	2-oxoisovalerate dehydrogenase subunit alpha, mitochondrial	45308.6	51698.1	45114.9	26682.1	39298.6	40475.4
P12814;P12814-3	P12814;P35609;P12814-2;P12814-3;P12814-4;P35609-2	ACTN1_HUMAN	ACTN1	Alpha-actinin-1	57059.9	66413.1	70461.6	351921	379021	348279
P12830;P12830-2	P12830;P12830-2	CADH1_HUMAN	CDH1	Cadherin-1	74740.2	63866.6	47021.2	148981	89013.6	103681
P12931;P12931-2;P12931-3	P12931;P12931-2;P12931-3	SRC_HUMAN	SRC	Proto-oncogene tyrosine-protein kinase Src	49242.2	41547.5	55676.8	26682.3	53608.5	50023.6
P12956	P12956;P12956-2	XRCC6_HUMAN	XRCC6	X-ray repair cross-complementing protein 6	194835	189694	214696	204598	219640	188579
P13010	P13010	XRCC5_HUMAN	XRCC5	X-ray repair cross-complementing protein 5	166777	155193	156222	195460	173805	141405
P13051;P13051-2	P13051;P13051-2	UNG_HUMAN	UNG	Uracil-DNA glycosylase	25430.1	36036.8	32063.5	25159.1	12861.4	13992
P13473;P13473-2;P13473-3	P13473;P13473-2;P13473-3	LAMP2_HUMAN	LAMP2	Lysosome-associated membrane glycoprotein 2	90327.3	97134.5	115267	33849.6	48045.2	43588.8
P13489	P13489	RINI_HUMAN	RNH1	Ribonuclease inhibitor	470424	452405	449689	324621	260514	272831
P13637;P13637-2;P13637-3	P13637;P13637-2;P13637-3	AT1A3_HUMAN	ATP1A3	Sodium/potassium-transporting ATPase subunit alpha-3	14468	19856.4	25096.5	21018.5	18647.1	15340
P13639	P13639	EF2_HUMAN	EEF2	Elongation factor 2	2400000	2230000	2750000	2130000	2340000	2180000
P13645	P13645	K1C10_HUMAN	KRT10	Keratin, type I cytoskeletal 10	3520000	5120000	4350000	4130000	3670000	2170000
P13647	P13647	K2C5_HUMAN	KRT5	Keratin, type II cytoskeletal 5	454443	674411	477759	754166	559473	391780
P13667	P13667	PDIA4_HUMAN	PDIA4	Protein disulfide-isomerase A4	231143	234923	258141	143786	191689	130648
P13674	P13674;P13674-2;P13674-3	P4HA1_HUMAN	P4HA1	Prolyl 4-hydroxylase subunit alpha-1	150150	167271	182098	129373	91073.5	67157.7
P13693	P13693;Q9HAU6;P13693-2	TCTP_HUMAN	TPT1	Translationally-controlled tumor protein	41338.4	39003.9	37289.6	140791	182812	177954
P13716;P13716-2	P13716;P13716-2	HEM2_HUMAN	ALAD	Delta-aminolevulinic acid dehydratase	35013.3	44639.3	32293.9	23402.6	34594.8	19443.1
P13798	P13798	ACPH_HUMAN	APEH	Acylamino-acid-releasing enzyme	390441	377581	395981	240547	297177	256229
P13804;P13804-2	P13804;P13804-2	ETFA_HUMAN	ETFA	Electron transfer flavoprotein subunit alpha, mitochondrial	230804	250211	232908	142757	165736	209923
P13807;P13807-2	P13807;P13807-2	GYS1_HUMAN	GYS1	Glycogen [starch] synthase, muscle	91832.3	115958	123971	101134	69733.8	122278
P13861;P13861-2	P13861;P31323;P13861-2	KAP2_HUMAN	PRKAR2A	cAMP-dependent protein kinase type II-alpha regulatory subunit	145511	236878	331584	213785	206773	222739
P13929;P13929-3	P13929;P13929-3	ENOB_HUMAN	ENO3	Beta-enolase	65990.2	77385.7	48266.2	51330.7	55010	55019
P13995;P13995-2	P13995;P13995-2	MTDC_HUMAN	MTHFD2	Bifunctional methylenetetrahydrofolate dehydrogenase/cyclohydrolase, mitochondrial				35965.4	31179.6	21231.2
P14314;P14314-2	P14314;P14314-2	GLU2B_HUMAN	PRKCSH	Glucosidase 2 subunit beta	222913	245549	230092	141655	179128	188388
P14324;P14324-2	P14324;P14324-2	FPPS_HUMAN	FDPS	Farnesyl pyrophosphate synthase	116108	110786	107599	101000	117389	98580.2
P14550	P14550	AK1A1_HUMAN	AKR1A1	Aldo-keto reductase family 1 member A1	41247.8	44478.2	40323.9	67552.9	70208.9	67988.9
P14618	P14618;P14618-2;P14618-3	KPYM_HUMAN	PKM	Pyruvate kinase PKM	7300000	7240000	7900000	5100000	5650000	5420000
P14618-2	P14618-2	KPYM_HUMAN	PKM	Isoform M1 of Pyruvate kinase PKM	52231.9	37092.9	27938.3	16629.2	29924.5	15783.2
P14625	P14625;Q58FF3	ENPL_HUMAN	HSP90B1	Endoplasmin	642747	664430	837418	1220000	1260000	1180000
P14735	P14735;P14735-2	IDE_HUMAN	IDE	Insulin-degrading enzyme	161352	146763	164099	187492	216971	202448
P14866	P14866	HNRPL_HUMAN	HNRNPL	Heterogeneous nuclear ribonucleoprotein L	623890	631606	896266	917005	1010000	1280000
P14868	P14868	SYDC_HUMAN	DARS1	Aspartate--tRNA ligase, cytoplasmic	749231	742829	725126	532129	614359	493342
P14923	P14923	PLAK_HUMAN	JUP	Junction plakoglobin	36949.2	50034.8	24171.3	109637	56891.3	54266.9
P15104	P15104	GLNA_HUMAN	GLUL	Glutamine synthetase	258737	268873	265247	145803	175256	127426
P15121	P15121	ALDR_HUMAN	AKR1B1	Aldo-keto reductase family 1 member B1	36495.9	30464.5	37746.8	46216.8	50366.3	58319.7
P15153;P60763;P63000;P63000-2	P15153;P60763;P63000;P63000-2	RAC1_HUMAN;RAC2_HUMAN;RAC3_HUMAN	RAC1;RAC2;RAC3	Ras-related C3 botulinum toxin substrate 2	535627	490471	479130	349851	409201	371982
P15170-2;P15170-3	P15170;P15170-2;P15170-3	ERF3A_HUMAN	GSPT1	Isoform 2 of Eukaryotic peptide chain release factor GTP-binding subunit ERF3A	372879	360103	395510	664919	691682	716939
P15311	P15311	EZRI_HUMAN	EZR	Ezrin	92983.8	91621.4	91898.8	86017	102893	86222.1
P15374	P15374	UCHL3_HUMAN	UCHL3	Ubiquitin carboxyl-terminal hydrolase isozyme L3	2580000	2170000	3180000	75547.5	142120	132637
P15531;P15531-2	P15531;P15531-2	NDKA_HUMAN	NME1	Nucleoside diphosphate kinase A	359249	406110	385470	627666	779557	771565
P15559;P15559-2;P15559-3	P15559;P15559-2;P15559-3	NQO1_HUMAN	NQO1	NAD(P)H dehydrogenase [quinone] 1	1350000	1380000	1400000	787153	1150000	852801
P15586;P15586-2	P15586;P15586-2	GNS_HUMAN	GNS	N-acetylglucosamine-6-sulfatase	163808	151472	139131	87546.5	132168
P15735;P15735-2	P15735;P15735-2	PHKG2_HUMAN	PHKG2	Phosphorylase b kinase gamma catalytic chain, liver/testis isoform		8683.37	18250.6	41723.7	40627.2	30006.6
P15880	P15880	RS2_HUMAN	RPS2	Small ribosomal subunit protein uS5	48122.4	55369.3	46617.5	47328.1	51912.9	43086.3
P15924	P15924;P15924-2;P15924-3	DESP_HUMAN	DSP	Desmoplakin	110553	125249	94488.8	499233	262855	196740
P16070;P16070-10;P16070-11;P16070-12;P16070-13;P16070-14;P16070-15;P16070-16;P16070-17;P16070-18;P16070-3;P16070-4;P16070-5;P16070-6;P16070-7;P16070-8;P16070-9	P16070;P16070-10;P16070-11;P16070-12;P16070-13;P16070-14;P16070-15;P16070-16;P16070-17;P16070-18;P16070-3;P16070-4;P16070-5;P16070-6;P16070-7;P16070-8;P16070-9	CD44_HUMAN	CD44	CD44 antigen	61218.3	56304.4	47381.8	54542.3		49617.7
P16152	P16152;P16152-2	CBR1_HUMAN	CBR1	Carbonyl reductase [NADPH] 1	1310000	1180000	1170000	611361	699602	673108
P16278;P16278-3	P16278;P16278-3	BGAL_HUMAN	GLB1	Beta-galactosidase	89895.9	71051.6	67553	33627	50114	52569.7
P16435	P16435	NCPR_HUMAN	POR	NADPH--cytochrome P450 reductase	452607	444277	465887	370869	379765	310405
P16455	P16455	MGMT_HUMAN	MGMT	Methylated-DNA--protein-cysteine methyltransferase				71657.5	54609.9	70029.5
P16615;P16615-2;P16615-3;P16615-4;P16615-5	P16615;P16615-2;P16615-3;P16615-4;P16615-5	AT2A2_HUMAN	ATP2A2	Sarcoplasmic/endoplasmic reticulum calcium ATPase 2	119692	109387	113290	120107	78471.2	76462.7
P16885	P16885	PLCG2_HUMAN	PLCG2	1-phosphatidylinositol 4,5-bisphosphate phosphodiesterase gamma-2	78202.9	78784	97634.5	151057	159864	147509
P16930;P16930-2	P16930;P16930-2	FAAA_HUMAN	FAH	Fumarylacetoacetase	137897			257749	149078	169162
P16949;P16949-2	P16949;P16949-2	STMN1_HUMAN	STMN1	Stathmin	51272.2	61827.8	75475.1	48085.8	40398.2	66181.3
P16989;P16989-3	P16989;P16989-3	YBOX3_HUMAN	YBX3	Y-box-binding protein 3	114900	118059	149927	109686	128804	110501
P17174	P17174	AATC_HUMAN	GOT1	Aspartate aminotransferase, cytoplasmic	367698	362614	378250	205347	213249	157298
P17612;P17612-2	P17612;P17612-2	KAPCA_HUMAN	PRKACA	cAMP-dependent protein kinase catalytic subunit alpha	75388.3	79245.8	70869.1	52550	55704.6	47555
P17655;P17655-2	P17655;P17655-2	CAN2_HUMAN	CAPN2	Calpain-2 catalytic subunit	41532.7	50726.2	51393.7	49639.8	35072.8	30270.2
P17706;P17706-2;P17706-3;P17706-4	P17706;P17706-2;P17706-3;P17706-4	PTN2_HUMAN	PTPN2	Tyrosine-protein phosphatase non-receptor type 2	55216.1	72639.8	74366.6	57138.9
P17812;P17812-2	P17812;P17812-2	PYRG1_HUMAN	CTPS1	CTP synthase 1	113760	122467	104531	152854	131909	127247
P17844;P17844-2	P17844;P17844-2	DDX5_HUMAN	DDX5	Probable ATP-dependent RNA helicase DDX5	450920	467674	515036	342401	320767	400887
P17858-2	P08237;P17858;P08237-3;P17858-2	PFKAL_HUMAN	PFKL	Isoform 2 of ATP-dependent 6-phosphofructokinase, liver type	399078	435084	426292	368643	408837	403095
P17931	P17931	LEG3_HUMAN	LGALS3	Galectin-3	399038	448137	498366	731327	752774	674348
P17980	P17980	PRS6A_HUMAN	PSMC3	26S proteasome regulatory subunit 6A	41403.8	48108.2	50571.4	74388	74509.2	65865
P17987	P17987	TCPA_HUMAN	TCP1	T-complex protein 1 subunit alpha	699191	705567	715526	503891	560198	502856
P18031	P18031	PTN1_HUMAN	PTPN1	Tyrosine-protein phosphatase non-receptor type 1	74124.5	36081.7		179386	141477	133100
P18077	P18077	RL35A_HUMAN	RPL35A	Large ribosomal subunit protein eL33	296689	400751	292867	145158	202341	148423
P18085	P18085	ARF4_HUMAN	ARF4	ADP-ribosylation factor 4	2250000	1980000	2160000	1740000	1870000	1660000
P18124	P18124	RL7_HUMAN	RPL7	Large ribosomal subunit protein uL30	245390	299364	280948	115393	172504	186479
P18206;P18206-2	P18206;P18206-2	VINC_HUMAN	VCL	Vinculin				34938.6	32543.4
P18440	P18440	ARY1_HUMAN	NAT1	Arylamine N-acetyltransferase 1	48316.1	48280.8	43076.3	5441.09	9051.72	21300
P18583;P18583-10;P18583-3;P18583-4;P18583-5;P18583-6;P18583-7;P18583-9	P18583;P18583-10;P18583-2;P18583-3;P18583-4;P18583-5;P18583-6;P18583-7;P18583-8;P18583-9	SON_HUMAN	SON	Protein SON	74274.9	75345.5	111648	64584.3	83184.5	87546.6
P18621;P18621-3	P18621;P18621-3	RL17_HUMAN	RPL17	Large ribosomal subunit protein uL22	839297	742387	945510	741123	932814	790254
P18669	P15259;P18669	PGAM1_HUMAN	PGAM1	Phosphoglycerate mutase 1	437263	416718	466953	490010	579085	493818
P18754;P18754-2	P18754;P18754-2	RCC1_HUMAN	RCC1	Regulator of chromosome condensation	303273	293322	340023	211928	213673	242576
P19013	P19013	K2C4_HUMAN	KRT4	Keratin, type II cytoskeletal 4			24035.7	62173.3	123469	88242.9
P19174;P19174-2	P19174;P19174-2	PLCG1_HUMAN	PLCG1	1-phosphatidylinositol 4,5-bisphosphate phosphodiesterase gamma-1	96285.1	88871.8	66450.4	63370.8	62595.6	66239.8
P19338	P19338	NUCL_HUMAN	NCL	Nucleolin	230056	257863	379670	544513	651356	616872
P19367;P19367-2;P19367-3;P19367-4	P19367;P19367-2;P19367-3;P19367-4	HXK1_HUMAN	HK1	Hexokinase-1	178144	190548	178399	206948	200536	201085
P19387	P19387	RPB3_HUMAN	POLR2C	DNA-directed RNA polymerase II subunit RPB3	70512.7	45021.1	42009.8	47391.7	41678.1	29251.2
P19525;P19525-2	P19525;P19525-2	E2AK2_HUMAN	EIF2AK2	Interferon-induced, double-stranded RNA-activated protein kinase	103030	122097	126297	108988	86423.9	110062
P19623	P19623	SPEE_HUMAN	SRM	Spermidine synthase	423218	416038	490299	461336	533061	449006
P19784	P19784	CSK22_HUMAN	CSNK2A2	Casein kinase II subunit alpha'	99480.3	90785.1	79797.9	38346.9	66799.3	65468.5
P19838;P19838-2	P19838;P19838-2	NFKB1_HUMAN	NFKB1	Nuclear factor NF-kappa-B p105 subunit	153075	143465	182404	148370	178738	170862
P20020;P20020-1;P20020-2;P20020-4;P20020-5;P20020-6	P20020;P23634;P23634-2;P23634-3;P23634-4;P23634-5;P23634-6;P23634-7;P23634-8;P20020-1;P20020-2;P20020-4;P20020-5;P20020-6	AT2B1_HUMAN	ATP2B1	Plasma membrane calcium-transporting ATPase 1	20063.3		13033.5	12074.7
P20042	P20042	IF2B_HUMAN	EIF2S2	Eukaryotic translation initiation factor 2 subunit 2			15585	32006.6	38294.9	39787.5
P20073;P20073-2	P20073;P20073-2	ANXA7_HUMAN	ANXA7	Annexin A7	50673.4	57493.8	39447.6	272835	179300	195681
P20339;P20339-2	P20339;P20339-2	RAB5A_HUMAN	RAB5A	Ras-related protein Rab-5A	172014	186186	149845	113292	116401	107665
P20340;P20340-2	P20340;P20340-2;P20340-3;P20340-4	RAB6A_HUMAN	RAB6A	Ras-related protein Rab-6A	1490000	1720000	1470000	1170000	1240000	770711
P20618	P20618	PSB1_HUMAN	PSMB1	Proteasome subunit beta type-1	600116	674176	690086	245289	283330	246092
P20645	P20645	MPRD_HUMAN	M6PR	Cation-dependent mannose-6-phosphate receptor	42686.6	71891.7	72905.2	35225.3
P20700	P20700	LMNB1_HUMAN	LMNB1	Lamin-B1	100370	86612.9	98873.2	244298	220296	199585
P20930	P20930	FILA_HUMAN	FLG	Filaggrin	127340	218691	63594.4	136814	97198.1	78446.4
P21266	P21266	GSTM3_HUMAN	GSTM3	Glutathione S-transferase Mu 3	399260	416350	393077	886068	1070000	946563
P21281	P21281	VATB2_HUMAN	ATP6V1B2	V-type proton ATPase subunit B, brain isoform	74744.8	79649.2	72912.2	37558.3	57709.7	53709.6
P21283	P21283	VATC1_HUMAN	ATP6V1C1	V-type proton ATPase subunit C 1	14231.5	16487.2		72712.2	65873.7	59048.4
P21291	P21291	CSRP1_HUMAN	CSRP1	Cysteine and glycine-rich protein 1	79164.2	84107	128941	422076	445960	457581
P21333;P21333-2	P21333;P21333-2	FLNA_HUMAN	FLNA	Filamin-A	233960	233448	232949	2160000	1440000	1490000
P21399	P21399	ACOHC_HUMAN	ACO1	Cytoplasmic aconitate hydratase	113668	97247.9	98214.1	75219.6	87559	69353.7
P21796	P21796	VDAC1_HUMAN	VDAC1	Voltage-dependent anion-selective channel protein 1	206838	246345	291533	168478	167324	130163
P22033	P22033	MUTA_HUMAN	MMUT	Methylmalonyl-CoA mutase, mitochondrial	25495	28113.3	25710.6	21822.9	27823.9	12189.3
P22059	P22059	OSBP1_HUMAN	OSBP	Oxysterol-binding protein 1	176632	171944	174572	159381	118571	96566.2
P22061;P22061-2	P22061;P22061-2	PIMT_HUMAN	PCMT1	Protein-L-isoaspartate(D-aspartate) O-methyltransferase	58715	58346.2	63282.7	70798.8	70920.3	72098.6
P22102	P22102	PUR2_HUMAN	GART	Trifunctional purine biosynthetic protein adenosine-3	271953	252890	245621	201174	225195	225662
P22234;P22234-2	P22234;P22234-2	PUR6_HUMAN	PAICS	Bifunctional phosphoribosylaminoimidazole carboxylase/phosphoribosylaminoimidazole succinocarboxamide synthetase	299169	310710	300555	378763	432058	375385
P22314;P22314-2	P22314;P22314-2	UBA1_HUMAN	UBA1	Ubiquitin-like modifier-activating enzyme 1	270192	270534	259736	480255	525279	487635
P22392-2	P15531;P22392-2;P15531-2	NDKB_HUMAN	NME2	Isoform 3 of Nucleoside diphosphate kinase B	732984	812001	737063	1150000	1440000	1400000
P22570;P22570-3;P22570-4;P22570-5;P22570-7	P22570;P22570-2;P22570-3;P22570-4;P22570-5;P22570-6;P22570-7	ADRO_HUMAN	FDXR	NADPH:adrenodoxin oxidoreductase, mitochondrial	67241.5	71539.1	82348.7	48194.3	60604.2	60398.6
P22626	P22626;P22626-2	ROA2_HUMAN	HNRNPA2B1	Heterogeneous nuclear ribonucleoproteins A2/B1	2220000	2580000	2680000	3380000	4090000	3850000
P22695	P22695	QCR2_HUMAN	UQCRC2	Cytochrome b-c1 complex subunit 2, mitochondrial	48985.6	56028.6	58717.8	46901.5	51875.9	39199.1
P23193	P23193	TCEA1_HUMAN	TCEA1	Transcription elongation factor A protein 1				66487.8	59273.2	67674.3
P23246;P23246-2	P23246;P23246-2	SFPQ_HUMAN	SFPQ	Splicing factor, proline- and glutamine-rich				34028.5		28992
P23258	P23258	TBG1_HUMAN	TUBG1	Tubulin gamma-1 chain	58129.2	62695.9	68834.7	42104.9	39060.7	25127.1
P23284	P23284	PPIB_HUMAN	PPIB	Peptidyl-prolyl cis-trans isomerase B	270747	275398	297698	273465	313304	217109
P23381;P23381-2	P23381;P23381-2	SYWC_HUMAN	WARS1	Tryptophan--tRNA ligase, cytoplasmic	299578	309178	302210	246485	264227	228311
P23396	P23396;P23396-2	RS3_HUMAN	RPS3	Small ribosomal subunit protein uS3	603537	644826	634418	373610	409849	346133
P23443;P23443-2;P23443-3;P23443-5	P23443;P23443-4;P23443-2;P23443-3;P23443-5	KS6B1_HUMAN	RPS6KB1	Ribosomal protein S6 kinase beta-1	381284	369142	353901	618669	490637	540342
P23526	P23526;P23526-2	SAHH_HUMAN	AHCY	Adenosylhomocysteinase	192321	203822	230091	746152	841680	594163
P23528	P23528;Q9Y281;Q9Y281-3	COF1_HUMAN	CFL1	Cofilin-1	516716	587944	661641	2000000	2020000	1770000
P23588;P23588-2	P23588;P23588-2	IF4B_HUMAN	EIF4B	Eukaryotic translation initiation factor 4B					19530.9
P23786	P23786	CPT2_HUMAN	CPT2	Carnitine O-palmitoyltransferase 2, mitochondrial	20692.9	14779.9	23491.6
P23919;P23919-2	P23919;P23919-2	KTHY_HUMAN	DTYMK	Thymidylate kinase	51930.2	35753.1	41015.8	243633	219911	226282
P23921	P23921	RIR1_HUMAN	RRM1	Ribonucleoside-diphosphate reductase large subunit	168176	188078	162765	202434	188657	179143
P24534	P24534	EF1B_HUMAN	EEF1B2	Elongation factor 1-beta	124565	138819	137578	163179	170417	163586
P24666	P24666;P24666-2;P24666-3;P24666-4	PPAC_HUMAN	ACP1	Low molecular weight phosphotyrosine protein phosphatase	64693.6	74453.1	81822.1	458297	439310	472782
P24752	P24752	THIL_HUMAN	ACAT1	Acetyl-CoA acetyltransferase, mitochondrial				33830.4	35988	53875.9
P24855	P24855	DNAS1_HUMAN	DNASE1	Deoxyribonuclease-1	59317.2	35266.4	61921.8	44202.6	56765.1	45000
P24928	P24928;P24928-2	RPB1_HUMAN	POLR2A	DNA-directed RNA polymerase II subunit RPB1	195111	179349	195269	76087.5	113303	90106.6
P24941;P24941-2	P24941;P24941-2	CDK2_HUMAN	CDK2	Cyclin-dependent kinase 2	26525.5		24176.7	82044.4	56818	44297.7
P25098;P35626	P25098;P35626	ARBK1_HUMAN;ARBK2_HUMAN	GRK2;GRK3	Beta-adrenergic receptor kinase 1	52544.1	48053.5	40895.9	53226.7	62518.3	60295.9
P25205;P25205-2	P25205;P25205-2	MCM3_HUMAN	MCM3	DNA replication licensing factor MCM3	258832	274246	271346	239855	259571	268705
P25325;P25325-2	P25325;P25325-2	THTM_HUMAN	MPST	3-mercaptopyruvate sulfurtransferase		30234.8	62726.5	126418	104587	132752
P25398	P25398	RS12_HUMAN	RPS12	Small ribosomal subunit protein eS12	191250	208178	219337	505177	546873	554096
P25490	P25490	TYY1_HUMAN	YY1	Transcriptional repressor protein YY1	54463.5	48659.9	44967.6	68247.5	67042.1	66616.7
P25685;P25685-2	P25685;P25685-2	DNJB1_HUMAN	DNAJB1	DnaJ homolog subfamily B member 1	26921.8	16324.2	12445.5	301368	193123	229289
P25705;P25705-2	P25705;P25705-2	ATPA_HUMAN	ATP5F1A	ATP synthase subunit alpha, mitochondrial	275305	279288	294405	304747	277291	280328
P25786;P25786-2	P25786;P25786-2	PSA1_HUMAN	PSMA1	Proteasome subunit alpha type-1	279108	258482	259739	331787	439841	329274
P25787	P25787	PSA2_HUMAN	PSMA2	Proteasome subunit alpha type-2	494290	511766	539819	302063	410778	363521
P25788;P25788-2	P25788;P25788-2	PSA3_HUMAN	PSMA3	Proteasome subunit alpha type-3	234947	229736	209838	183412	197412	159213
P25789	P25789;P25789-2	PSA4_HUMAN	PSMA4	Proteasome subunit alpha type-4	367815	412299	401197	272979	349176	286110
P26196	P26196	DDX6_HUMAN	DDX6	Probable ATP-dependent RNA helicase DDX6	87704.6	86399.7	83068	150544	117073	119263
P26358;P26358-2;P26358-3	P26358;P26358-2;P26358-3	DNMT1_HUMAN	DNMT1	DNA (cytosine-5)-methyltransferase 1	47576.1	56771.3	49450.3	36856.2	44846.7	40093.3
P26368;P26368-2	P26368;P26368-2	U2AF2_HUMAN	U2AF2	Splicing factor U2AF 65 kDa subunit	14997.1	12724.8	16717.9	23053.8	32315.6	35255
P26373	P26373	RL13_HUMAN	RPL13	Large ribosomal subunit protein eL13	262180	257383	231828	139076	190163	198261
P26440;P26440-2	P26440;P26440-2	IVD_HUMAN	IVD	Isovaleryl-CoA dehydrogenase, mitochondrial				20265.2	24649.1	26802.3
P26583	P26583	HMGB2_HUMAN	HMGB2	High mobility group protein B2	9900.45	11470.2	14586.4	77985.7	83153	87898.9
P26599;P26599-1;P26599-2	P26599;P26599-1;P26599-2	PTBP1_HUMAN	PTBP1	Polypyrimidine tract-binding protein 1	163118	163510	157933	591955	565966	492138
P26639;P26639-2	A2RTX5;P26639;A2RTX5-2;P26639-2	SYTC_HUMAN	TARS1	Threonine--tRNA ligase 1, cytoplasmic	406926	391448	416867	316196	373993	318830
P26640	P26640	SYVC_HUMAN	VARS1	Valine--tRNA ligase	163626	139415	175504	271029	253718	250373
P26641;P26641-2	P26641;P26641-2	EF1G_HUMAN	EEF1G	Elongation factor 1-gamma	877427	948932	947479	897283	979692	1000000
P27144	P27144	KAD4_HUMAN	AK4	Adenylate kinase 4, mitochondrial				79658.1	52464.3	64796.8
P27348	P27348	1433T_HUMAN	YWHAQ	14-3-3 protein theta	64427.4	69730.3	85728.9	281082	285129	300827
P27361	P27361;P27361-3	MK03_HUMAN	MAPK3	Mitogen-activated protein kinase 3	51405.6	54611.6	52894.6	179480	137011	146399
P27635	P27635;Q96L21	RL10_HUMAN	RPL10	Large ribosomal subunit protein uL16	587055	576701	671866	307802	372543	336494
P27694	P27694	RFA1_HUMAN	RPA1	Replication protein A 70 kDa DNA-binding subunit	443588	466363	402964	269159	296115	258332
P27695	P27695	APEX1_HUMAN	APEX1	DNA-(apurinic or apyrimidinic site) endonuclease	229455	194395	222984	154183	158413	139592
P27707	P27707	DCK_HUMAN	DCK	Deoxycytidine kinase	147492	152108	136383	103901	93514.6	88722.3
P27708	P27708	PYR1_HUMAN	CAD	CAD protein	300277	268390	294164	288161	306909	277842
P27797	P27797	CALR_HUMAN	CALR	Calreticulin	857567	764139	871235	910963	1030000	984044
P27816;P27816-2;P27816-4;P27816-6	P27816;P27816-2;P27816-4;P27816-6	MAP4_HUMAN	MAP4	Microtubule-associated protein 4	58297.3	62795.4	103862	91935.8	88491.7	80858.6
P27824;P27824-2	P27824;P27824-2;P27824-3	CALX_HUMAN	CANX	Calnexin	118795	112934	121797	266377	206147	215610
P27986;P27986-4	P27986;P27986-4	P85A_HUMAN	PIK3R1	Phosphatidylinositol 3-kinase regulatory subunit alpha			18558.5	68140.6	31231.3	34080.3
P28066	P28066;P28066-2	PSA5_HUMAN	PSMA5	Proteasome subunit alpha type-5	181494	174723	165427	177686	171510	147871
P28070	P28070	PSB4_HUMAN	PSMB4	Proteasome subunit beta type-4	339217	327830	355272	246643	293124	210253
P28072	P28072	PSB6_HUMAN	PSMB6	Proteasome subunit beta type-6	142054	183894	207487	472360	533150	478550
P28074	P28074;P28074-3	PSB5_HUMAN	PSMB5	Proteasome subunit beta type-5	558997	661192	597333	365109	475957	292073
P28288;P28288-2	P28288;P28288-2	ABCD3_HUMAN	ABCD3	ATP-binding cassette sub-family D member 3	22086.8	19351.1
P28331;P28331-2;P28331-4;P28331-5	P28331;P28331-2;P28331-4;P28331-5	NDUS1_HUMAN	NDUFS1	NADH-ubiquinone oxidoreductase 75 kDa subunit, mitochondrial	18652.5	19901.4	15317.4	39799.5	34973.1	33069.6
P28340	P28340	DPOD1_HUMAN	POLD1	DNA polymerase delta catalytic subunit	54410.5	47009.3	48783.2	40863.5	30294
P28482	P27361;P28482;P31152;Q16659;P27361-2;P27361-3;P28482-2	MK01_HUMAN	MAPK1	Mitogen-activated protein kinase 1	111964	135785	136130	298820	304796	294487
P28676	P28676	GRAN_HUMAN	GCA	Grancalcin				83378	71440.9	75549.7
P28827;P28827-2;Q15262;Q15262-2;Q15262-3;Q15262-4	P28827;Q15262;Q15262-2;Q15262-3;Q15262-4;P28827-2	PTPRK_HUMAN;PTPRM_HUMAN	PTPRK;PTPRM	Receptor-type tyrosine-protein phosphatase mu	18156.3	13061	20448.3
P28838;P28838-2	P28838;P28838-2	AMPL_HUMAN	LAP3	Cytosol aminopeptidase	56691.5	52585.2	46638.7	221688	259885	253534
P29144	P29144	TPP2_HUMAN	TPP2	Tripeptidyl-peptidase 2	116024	109785	133874	151487	176947	165069
P29218;P29218-3	P29218;P29218-3;P29218-2	IMPA1_HUMAN	IMPA1	Inositol monophosphatase 1	45370.5	46614.4	63179.4	42160.6	47409.9
P29350;P29350-3	P29350;P29350-2;P29350-3;P29350-4	PTN6_HUMAN	PTPN6	Tyrosine-protein phosphatase non-receptor type 6	43282.2	38021.1	45289.7	97323.4	59977.2	64025.7
P29353;P29353-2;P29353-3;P29353-5;P29353-6;P29353-7	P29353;P29353-2;P29353-7;P29353-3;P29353-5;P29353-6	SHC1_HUMAN	SHC1	SHC-transforming protein 1	26224.7	27401.8	24241.9	44102.6	28246	27142.7
P29373	P29373	RABP2_HUMAN	CRABP2	Cellular retinoic acid-binding protein 2	91690.9	104974	80721.9	783310	735618	587406
P29401;P29401-2	P29401;P29401-2	TKT_HUMAN	TKT	Transketolase	1470000	1460000	1620000	566932	692111	574193
P29508;P29508-2	P29508;P29508-2	SPB3_HUMAN	SERPINB3	Serpin B3	13520	24945.8	7929.69	24021.6	20620.2
P29692;P29692-2	P29692;P29692-2;P29692-3;P29692-4	EF1D_HUMAN	EEF1D	Elongation factor 1-delta	106221	117451	117704	499693	520958	409754
P29762	P29762	RABP1_HUMAN	CRABP1	Cellular retinoic acid-binding protein 1				127877	118235	120326
P30038;P30038-3	P30038;P30038-3	AL4A1_HUMAN	ALDH4A1	Delta-1-pyrroline-5-carboxylate dehydrogenase, mitochondrial	55944.1	54266.5	59833.2	64897.9	83290.3	68527.8
P30040	P30040	ERP29_HUMAN	ERP29	Endoplasmic reticulum resident protein 29	60884.8	79728.4	83427.9	88297.7	106987	109698
P30041	P30041	PRDX6_HUMAN	PRDX6	Peroxiredoxin-6	1040000	1010000	1110000	800788	908562	725525
P30043	P30043	BLVRB_HUMAN	BLVRB	Flavin reductase (NADPH)	170208	179831	214621	286573	313581	295676
P30044;P30044-2	P30044;P30044-2;P30044-3	PRDX5_HUMAN	PRDX5	Peroxiredoxin-5, mitochondrial	153985	194437	185815	403191	347984	375629
P30048;P30048-2	P30048;P30048-2	PRDX3_HUMAN	PRDX3	Thioredoxin-dependent peroxide reductase, mitochondrial	736727	704080	697371	794062	717143	655926
P30050	P30050	RL12_HUMAN	RPL12	Large ribosomal subunit protein uL11	827010	961898	1360000	567427	683432	685514
P30084	P30084	ECHM_HUMAN	ECHS1	Enoyl-CoA hydratase, mitochondrial	121391	107191	121038	181459	223959	211044
P30085;P30085-3	P30085;P30085-3	KCY_HUMAN	CMPK1	UMP-CMP kinase	100990	117324	130949	145186	136611	136537
P30086	P30086	PEBP1_HUMAN	PEBP1	Phosphatidylethanolamine-binding protein 1	301180	302873	420358	359195	431558	401127
P30101	P30101	PDIA3_HUMAN	PDIA3	Protein disulfide-isomerase A3	79731.9	84409.2	71153.9	536176	585102	568390
P30153	P30153	2AAA_HUMAN	PPP2R1A	Serine/threonine-protein phosphatase 2A 65 kDa regulatory subunit A alpha isoform	97521.6	110065	129744	1020000	1050000	958329
P30419	P30419;P30419-2	NMT1_HUMAN	NMT1	Glycylpeptide N-tetradecanoyltransferase 1	100204	71692.9	69235	91130.3	82587.2	86536.2
P30520	P30520	PURA2_HUMAN	ADSS2	Adenylosuccinate synthetase isozyme 2	109917	110310	94133.7	103001	112468	101308
P30533	P30533	AMRP_HUMAN	LRPAP1	Alpha-2-macroglobulin receptor-associated protein	14683.3	16631.9	16507.9	19303.9	26197.2	27841.1
P30566	P30566	PUR8_HUMAN	ADSL	Adenylosuccinate lyase	16195.3	18747.5	25702.6	27531.1	54032.5	49283
P30626;P30626-2;P30626-3	P30626;P30626-2;P30626-3	SORCN_HUMAN	SRI	Sorcin		10813.9	15163.5	122010	114888	127318
P30740	P30740;P30740-2	ILEU_HUMAN	SERPINB1	Leukocyte elastase inhibitor	96920.3	97769.1	101481	94476.9	131775	107804
P30876	P30876	RPB2_HUMAN	POLR2B	DNA-directed RNA polymerase II subunit RPB2	65456.4	63674.3	65691.1	37737	45269.9	37248.2
P31040	P31040	SDHA_HUMAN	SDHA	Succinate dehydrogenase [ubiquinone] flavoprotein subunit, mitochondrial	696565	705074	763533	359871	475638	495202
P31150	P31150	GDIA_HUMAN	GDI1	Rab GDP dissociation inhibitor alpha	200456	192168	223942	135431	94202	101389
P31151	P31151	S10A7_HUMAN	S100A7	Protein S100-A7	45154.5	45885.6	57908	56847.2		71271.3
P31153	P31153;P31153-2	METK2_HUMAN	MAT2A	S-adenosylmethionine synthase isoform type-2	449514	381750	446285	268267	307595	304196
P31350;P31350-2	P31350;Q7LG56;P31350-2;Q7LG56-2;Q7LG56-3;Q7LG56-6	RIR2_HUMAN	RRM2	Ribonucleoside-diphosphate reductase subunit M2	63312.8	75740.4	72813	36402	46133	37039.3
P31483;P31483-3	P31483;P31483-3	TIA1_HUMAN	TIA1	Cytotoxic granule associated RNA binding protein TIA1	23695.9	39432.5	38619.7	66984.2	88851.9	84798.8
P31689	P31689	DNJA1_HUMAN	DNAJA1	DnaJ homolog subfamily A member 1	103373	97305.1	97306.1	290174	289371	233832
P31749	P31749;P31749-2	AKT1_HUMAN	AKT1	RAC-alpha serine/threonine-protein kinase	87934.9	104744	94474.8	91742.5	74635.5	66026.9
P31751;P31751-2	P31751;P31751-2	AKT2_HUMAN	AKT2	RAC-beta serine/threonine-protein kinase	28135.5	28102.1	19396.3	20107	24494.9	18569.3
P31930	P31930	QCR1_HUMAN	UQCRC1	Cytochrome b-c1 complex subunit 1, mitochondrial	18307.4	26939.4	16951.4	20671.7	20395.7
P31939	P31939;P31939-2	PUR9_HUMAN	ATIC	Bifunctional purine biosynthesis protein ATIC	731197	779400	841991	539744	623096	571298
P31942-2	P31942;P31942-2;P31942-3;P31942-4;P31942-5;P31942-6	HNRH3_HUMAN	HNRNPH3	Isoform 2 of Heterogeneous nuclear ribonucleoprotein H3	1500000	2180000	2970000	1080000	1550000	1320000
P31943	P31943	HNRH1_HUMAN	HNRNPH1	Heterogeneous nuclear ribonucleoprotein H	1630000	1910000	2180000	3260000	3690000	3960000
P31944	P31944	CASPE_HUMAN	CASP14	Caspase-14	63644.2	62300	32080.1	74685.2	43694.2	49509.3
P31946;P31946-2	P31946;P31946-2	1433B_HUMAN	YWHAB	14-3-3 protein beta/alpha	83324.7	89675.2	68848.6	227092	195293	200425
P31947;P31947-2	P31947;P31947-2	1433S_HUMAN	SFN	14-3-3 protein sigma	45498.4	33619.2		78381.7	63879.7	61882.6
P31948;P31948-2	P31948;P31948-2	STIP1_HUMAN	STIP1	Stress-induced-phosphoprotein 1	95818.1	86105.8	76166.6	778299	702102	774058
P31949	P31949	S10AB_HUMAN	S100A11	Protein S100-A11	63678.9	69811.5	69009	229374	143823	174422
P32019;P32019-2;P32019-3	P32019;P32019-2;P32019-3	I5P2_HUMAN	INPP5B	Type II inositol 1,4,5-trisphosphate 5-phosphatase	25644	17379.1	18206.3
P32119	P32119	PRDX2_HUMAN	PRDX2	Peroxiredoxin-2	555579	562672	583504	630926	700145	588172
P32321;P32321-2	P32321;P32321-2	DCTD_HUMAN	DCTD	Deoxycytidylate deaminase	43851.5	34758.4	18808.8
P32322;P32322-2;P32322-3	P32322;P32322-2;P32322-3	P5CR1_HUMAN	PYCR1	Pyrroline-5-carboxylate reductase 1, mitochondrial	8664.7	19097.4	29700.9	29783.8	30835.6
P32969	P32969	RL9_HUMAN	RPL9	Large ribosomal subunit protein uL6	215561	268856	219811	167924	196530	188537
P33176	O60282;P33176;Q12840	KINH_HUMAN	KIF5B	Kinesin-1 heavy chain	129607	122681	127560	212542	204495	211213
P33947;P33947-2	P24390;P33947;P24390-2;P33947-2	ERD22_HUMAN	KDELR2	ER lumen protein-retaining receptor 2	30177.6	32852.4	30489.1	14970.5	18314.9
P33991	P33991	MCM4_HUMAN	MCM4	DNA replication licensing factor MCM4	190294	183357	174782	200143	225052	207722
P33992	P33992	MCM5_HUMAN	MCM5	DNA replication licensing factor MCM5	668194	591957	629489	337437	351012	355904
P33993	P33993;P33993-2	MCM7_HUMAN	MCM7	DNA replication licensing factor MCM7	460456	470267	480294	312789	325090	333405
P34896;P34896-2	P34896;P34896-2;P34896-3	GLYC_HUMAN	SHMT1	Serine hydroxymethyltransferase, cytosolic	276068	257590	304333	227292	246730	186325
P34897;P34897-2;P34897-3	P34897;P34897-2;P34897-3	GLYM_HUMAN	SHMT2	Serine hydroxymethyltransferase, mitochondrial	572243	530706	661421	695922	827497	828180
P34932	P34932	HSP74_HUMAN	HSPA4	Heat shock 70 kDa protein 4	322471	275091	289622	151005	161984	125928
P34949	P34949	MPI_HUMAN	MPI	Mannose-6-phosphate isomerase	57471		62893.5	87978.9	97519.3	99194.2
P35030;P35030-2;P35030-3;P35030-4;P35030-5	P35030;P35030-2;P35030-3;P35030-4;P35030-5	TRY3_HUMAN	PRSS3	Trypsin-3	349687	409523	385671	463000	470023	406172
P35080	P35080	PROF2_HUMAN	PFN2	Profilin-2	26788.9	36530.3	24041	33307.6	46875.3	46457.4
P35080-2	P35080;P35080-2	PROF2_HUMAN	PFN2	Isoform IIb of Profilin-2	258545	288123	259213	288947	346269	293036
P35125-3	P35125;P35125-2;P35125-3	UBP6_HUMAN	USP6	Isoform 3 of Ubiquitin carboxyl-terminal hydrolase 6	248819	262481	550355			64026.3
P35221;P35221-2	P35221;P35221-2;P35221-3	CTNA1_HUMAN	CTNNA1	Catenin alpha-1	19825.6			153880	126831	131155
P35232	P35232;P35232-2	PHB1_HUMAN	PHB1	Prohibitin 1	133175	141948	140931	158600	153188	173483
P35237	P35237;P50452;P50452-2	SPB6_HUMAN	SERPINB6	Serpin B6	111264	96275.4	114698	73368.2	68209.9	86135.6
P35241;P35241-5	P35241;P35241-2;P35241-3;P35241-4;P35241-5	RADI_HUMAN	RDX	Radixin	468211	526295	589326	364032	436231	312087
P35244	P35244	RFA3_HUMAN	RPA3	Replication protein A 14 kDa subunit	48584.9	52985.3	51192	174214	159563	157753
P35250;P35250-2	P35250;P35250-2	RFC2_HUMAN	RFC2	Replication factor C subunit 2				74904.6	65292.3	62157.6
P35268	P35268	RL22_HUMAN	RPL22	Large ribosomal subunit protein eL22	505520	606605	456203	240124	299996	210301
P35270	P35270	SPRE_HUMAN	SPR	Sepiapterin reductase				42714.8	40565.9	26461.9
P35520;P35520-2	P35520;P35520-2	CBS_HUMAN	CBS	Cystathionine beta-synthase	80626.1	74982.8	90861	83932.5	76600.3	70018.4
P35527	P35527	K1C9_HUMAN	KRT9	Keratin, type I cytoskeletal 9	6020000	11700000	6010000	16700000	8100000	5720000
P35568	P35568	IRS1_HUMAN	IRS1	Insulin receptor substrate 1				80423.6	44304.5	40421.4
P35573;P35573-2;P35573-3	P35573;P35573-2;P35573-3	GDE_HUMAN	AGL	Glycogen debranching enzyme	28618.1	19840.2	15942.6	17910.5	29708.4
P35579	P35579;P35579-2	MYH9_HUMAN	MYH9	Myosin-9	98444.5	106223	93958.9	260604	197190	176823
P35580;P35580-3	P35580;P35580-2;P35580-3;P35580-4;P35580-5	MYH10_HUMAN	MYH10	Myosin-10	29000.9	23218.6	32409.3	58948.7	43619	36992.7
P35606;P35606-2	P35606;P35606-2	COPB2_HUMAN	COPB2	Coatomer subunit beta'	404762	395511	382677	259907	274417	248172
P35658;P35658-2;P35658-3;P35658-4;P35658-5	P35658;P35658-2;P35658-3;P35658-4;P35658-5	NU214_HUMAN	NUP214	Nuclear pore complex protein Nup214	54664.9	55304.2	70528.4	90158.3	72105.3	86180.3
P35813;P35813-3	P35813;P35813-2;P35813-3	PPM1A_HUMAN	PPM1A	Protein phosphatase 1A	40711.8	39139.2	37556.2	26031.1	40008.2	17739
P35908	P35908	K22E_HUMAN	KRT2	Keratin, type II cytoskeletal 2 epidermal	1200000	2080000	1100000	1210000	1270000	677642
P35998	P35998;P35998-2	PRS7_HUMAN	PSMC2	26S proteasome regulatory subunit 7	184189	182448	179777	169474	186012	163950
P36404;P36404-2	P36404;P36404-2	ARL2_HUMAN	ARL2	ADP-ribosylation factor-like protein 2	34995.4	51576.6	35990	34575.7	47383.5	43934.1
P36405	P36405	ARL3_HUMAN	ARL3	ADP-ribosylation factor-like protein 3	147403	142679	147261	324265	362472	313629
P36406;P36406-2;P36406-3	P36406;P36406-2;P36406-3	TRI23_HUMAN	TRIM23	E3 ubiquitin-protein ligase TRIM23			112301			113102
P36507	P36507;Q02750;Q02750-2	MP2K2_HUMAN	MAP2K2	Dual specificity mitogen-activated protein kinase kinase 2	99683.8	73195.3	53251.3	238102	169297	134662
P36542;P36542-2	P36542;P36542-2	ATPG_HUMAN	ATP5F1C	ATP synthase subunit gamma, mitochondrial	124132	147503	144377	110824	99619.5	114246
P36543;P36543-2	P36543;P36543-2	VATE1_HUMAN	ATP6V1E1	V-type proton ATPase subunit E 1	12484.3		3852.49	93509.9	107003	108427
P36575;P36575-2	P36575;P36575-2	ARRC_HUMAN	ARR3	Arrestin-C	26327.7	30085.5	29193.7	13664.1	15062.7
P36578	P36578	RL4_HUMAN	RPL4	Large ribosomal subunit protein uL4	428907	410213	421631	231740	275245	267875
P36639;P36639-1;P36639-2;P36639-3	P36639;P36639-1;P36639-2;P36639-3	8ODP_HUMAN	NUDT1	Oxidized purine nucleoside triphosphate hydrolase	34771.7	25829.4	44651.5	50541.2	51580.9	33807
P36776;P36776-2;P36776-3	P36776;P36776-2;P36776-3	LONM_HUMAN	LONP1	Lon protease homolog, mitochondrial		19343.5		94643.4	81461.4	71549.9
P36873;P36873-2	P36873;P36873-2	PP1G_HUMAN	PPP1CC	Serine/threonine-protein phosphatase PP1-gamma catalytic subunit	99439	100423	123918	102529	125322	119782
P36915	P36915;P36915-2	GNL1_HUMAN	GNL1	Guanine nucleotide-binding protein-like 1	35698.1	32730.6	48485.1	110058	93645.4	87432.1
P36954	P36954	RPB9_HUMAN	POLR2I	DNA-directed RNA polymerase II subunit RPB9				76133.6	72043.4	61550.8
P36957	P36957;P36957-2	ODO2_HUMAN	DLST	Dihydrolipoyllysine-residue succinyltransferase component of 2-oxoglutarate dehydrogenase complex, mitochondrial	144348	136796	134203	86850.3	105113	80923.7
P37108	P37108	SRP14_HUMAN	SRP14	Signal recognition particle 14 kDa protein	172005	184416	211749	83712.2	94357.9	97540.1
P37198	P37198	NUP62_HUMAN	NUP62	Nuclear pore glycoprotein p62	21718.4	14403.7	22586.1	57697.9	54807	52387
P37235;P61601;P84074	P37235;P61601;P84074	HPCA_HUMAN;HPCL1_HUMAN;NCALD_HUMAN	HPCA;HPCAL1;NCALD	Hippocalcin-like protein 1				37324.5	14051.7	22469.3
P37802;P37802-2	P37802;P37802-2	TAGL2_HUMAN	TAGLN2	Transgelin-2	73392.3	76404	71189.2	972415	859566	909819
P37837;P37837-2	P37837;P37837-2	TALDO_HUMAN	TALDO1	Transaldolase	311830	272737	285970	355042	415013	382562
P38117;P38117-2	P38117;P38117-2	ETFB_HUMAN	ETFB	Electron transfer flavoprotein subunit beta	62663.4	54696.5	55040.4	132230	111417	106554
P38159	P38159;Q96E39;P38159-2	RBMX_HUMAN	RBMX	RNA-binding motif protein, X chromosome	583541	645934	808910	691931	891203	905940
P38606;P38606-2	P38606;P38606-2	VATA_HUMAN	ATP6V1A	V-type proton ATPase catalytic subunit A	222588	211276	195817	303098	253977	252355
P38646	P38646	GRP75_HUMAN	HSPA9	Stress-70 protein, mitochondrial	243037	223471	228084	653913	626109	588403
P38919	P38919	IF4A3_HUMAN	EIF4A3	Eukaryotic initiation factor 4A-III	112109	131717	113151	174495	157483	147892
P38936	P38936	CDN1A_HUMAN	CDKN1A	Cyclin-dependent kinase inhibitor 1				42279.4	43506.1
P39019	P39019	RS19_HUMAN	RPS19	Small ribosomal subunit protein eS19	135203	156218	170943	164044	196732	175118
P39023	P39023	RL3_HUMAN	RPL3	Large ribosomal subunit protein uL3	117392	115912	110821	69060.1	80189.2	82553.6
P39656;P39656-3	P39656;P39656-2;P39656-3	OST48_HUMAN	DDOST	Dolichyl-diphosphooligosaccharide--protein glycosyltransferase 48 kDa subunit	343766	387496	324808	372170	374811	258062
P39687	P39687;O43423	AN32A_HUMAN	ANP32A	Acidic leucine-rich nuclear phosphoprotein 32 family member A	71119	90806.4	56589.9	196106	216202	234452
P39748	P39748;P39748-2	FEN1_HUMAN	FEN1	Flap endonuclease 1	40881.2	76705.6	13846.3	258846	166635	191732
P40121;P40121-2	P40121;P40121-2	CAPG_HUMAN	CAPG	Macrophage-capping protein				84209.6	64904.2	72176
P40123	P40123;P40123-2;P40123-3	CAP2_HUMAN	CAP2	Adenylyl cyclase-associated protein 2	145920	107614	104410	108663	108025	96451.4
P40222	P40222	TXLNA_HUMAN	TXLNA	Alpha-taxilin				21772.7	13816.7	19791
P40227	P40227;P40227-2	TCPZ_HUMAN	CCT6A	T-complex protein 1 subunit zeta	246924	244069	216549	344270	355948	349479
P40429	P40429	RL13A_HUMAN	RPL13A	Large ribosomal subunit protein uL13	80505.6	121845	90817.7	45031.7	86743.7	44476.4
P40616;P40616-2	P40616;P40616-2	ARL1_HUMAN	ARL1	ADP-ribosylation factor-like protein 1	174227	215149	199411	141718	161670	161482
P40763;P40763-2;P40763-3	P40763;P40763-2;P40763-3	STAT3_HUMAN	STAT3	Signal transducer and activator of transcription 3	201056	181046	148438	133008	117516	103162
P40818	P40818;P40818-2	UBP8_HUMAN	USP8	Ubiquitin carboxyl-terminal hydrolase 8	6600000	6520000	7870000	232378	234752	223511
P40925;P40925-3	P40925;P40925-2;P40925-3	MDHC_HUMAN	MDH1	Malate dehydrogenase, cytoplasmic	340792	317977	298214	215782	216924	203092
P40926	P40926;P40926-2	MDHM_HUMAN	MDH2	Malate dehydrogenase, mitochondrial	971952	941265	957798	275853	300253	271805
P40938;P40938-2	P40938;P40938-2	RFC3_HUMAN	RFC3	Replication factor C subunit 3	10898.6	8978.52	4598.22	52830.4	34521.2	32473.2
P40939	P40939	ECHA_HUMAN	HADHA	Trifunctional enzyme subunit alpha, mitochondrial	228933	212267	205090	152055	123424	110702
P41091	P41091	IF2G_HUMAN	EIF2S3	Eukaryotic translation initiation factor 2 subunit 3	427968	435261	432315	386322	364290	358376
P41223;P41223-2	P41223;P41223-2	BUD31_HUMAN	BUD31	Protein BUD31 homolog	5673.94			44687.9	47794.2	53564.6
P41227;P41227-2	P41227;P41227-2	NAA10_HUMAN	NAA10	N-alpha-acetyltransferase 10	118176	93378	124793	94948.6	90615	87627.5
P41240	P41240	CSK_HUMAN	CSK	Tyrosine-protein kinase CSK	38746.7	39829.4	39500.1	67143.7	59560.6	49286.9
P41250;P41250-2	P41250;P41250-2	GARS_HUMAN	GARS1	Glycine--tRNA ligase	215831	197516	220377	174239	186011	155296
P41252	P41252	SYIC_HUMAN	IARS1	Isoleucine--tRNA ligase, cytoplasmic	567792	517231	466363	277518	326512	329519
P41743	P41743;Q05513;Q05513-2;Q05513-3	KPCI_HUMAN	PRKCI	Protein kinase C iota type	175000	165434	126682	54138.3	71162.6	70895.5
P42025	P42025	ACTY_HUMAN	ACTR1B	Beta-centractin	113778	130897	116999	118638	93709.7	101510
P42126;P42126-2	P42126;P42126-2	ECI1_HUMAN	ECI1	Enoyl-CoA delta isomerase 1, mitochondrial	108364	106049	110377	50959.6	61288.1	39830.2
P42166	P42166	LAP2A_HUMAN	TMPO	Lamina-associated polypeptide 2, isoform alpha				40827.6	34803.5	30199.2
P42224	P42224;P42224-2	STAT1_HUMAN	STAT1	Signal transducer and activator of transcription 1-alpha/beta	565851	554092	580963	740504	597004	589392
P42229;P51692	P42229;P51692;P42229-2	STA5A_HUMAN;STA5B_HUMAN	STAT5A;STAT5B	Signal transducer and activator of transcription 5A	41453.6	41663.9	58544.9	54900.2	57219	44910.7
P42330	P42330;P42330-2	AK1C3_HUMAN	AKR1C3	Aldo-keto reductase family 1 member C3	129318	126961	138078	105771	93659.1	111720
P42345	P42345	MTOR_HUMAN	MTOR	Serine/threonine-protein kinase mTOR				37134.5	10306.2
P42677	P42677	RS27_HUMAN	RPS27	Small ribosomal subunit protein eS27	237581	190341	204669	85313.6	111610	75573.4
P42685;P42685-2	P42685;P42685-2	FRK_HUMAN	FRK	Tyrosine-protein kinase FRK	36016.2	37496.6	36720.4	99237.3	62422.2	72200.5
P42704	P42704	LPPRC_HUMAN	LRPPRC	Leucine-rich PPR motif-containing protein, mitochondrial	54132.1	53787.7	68013.1	286726	239188	240036
P42765	P42765	THIM_HUMAN	ACAA2	3-ketoacyl-CoA thiolase, mitochondrial	52313.3	56738.9	57935.7	21471	27990.2	32485.5
P43034	P43034;P43034-2	LIS1_HUMAN	PAFAH1B1	Platelet-activating factor acetylhydrolase IB subunit beta	241274	245208	246996	115611	160566	125308
P43243	P43243;P43243-2	MATR3_HUMAN	MATR3	Matrin-3	55469.3	50022.6	46289.2	396933	330942	393998
P43246;P43246-2	P43246;P43246-2	MSH2_HUMAN	MSH2	DNA mismatch repair protein Msh2	204676	230519	275142	312409	295031	319316
P43251;P43251-2;P43251-3;P43251-4	P43251;P43251-2;P43251-3;P43251-4	BTD_HUMAN	BTD	Biotinidase	34628.3	26282	30300.5	11735.1
P43487;P43487-2	P43487;Q9C010;Q9C010-2;P43487-2	RANG_HUMAN	RANBP1	Ran-specific GTPase-activating protein			29904.1	120263	137304	104007
P43490	P43490	NAMPT_HUMAN	NAMPT	Nicotinamide phosphoribosyltransferase	345190	322242	372544	345799	372504	355672
P43686	P43686;P43686-2	PRS6B_HUMAN	PSMC4	26S proteasome regulatory subunit 6B	232226	199694	181949	234418	247914	208579
P43897	P43897;P43897-2	EFTS_HUMAN	TSFM	Elongation factor Ts, mitochondrial	225605	247868	286579	353937	345624	364507
P45877	P45877	PPIC_HUMAN	PPIC	Peptidyl-prolyl cis-trans isomerase C	534098	553386	462867	387548	445319	449010
P45880;P45880-1;P45880-2	P45880;P45880-1;P45880-2	VDAC2_HUMAN	VDAC2	Voltage-dependent anion-selective channel protein 2	1360000	1310000	1260000	754714	731634	655615
P45954;P45954-2	P45954;P45954-2	ACDSB_HUMAN	ACADSB	Short/branched chain specific acyl-CoA dehydrogenase, mitochondrial	14282.1	17914	13073.1	22027	37846.4	23499.8
P45974;P45974-2	P45974;P45974-2	UBP5_HUMAN	USP5	Ubiquitin carboxyl-terminal hydrolase 5	25200000	25600000	32100000	398656	383475	357698
P46060	P46060	RAGP1_HUMAN	RANGAP1	Ran GTPase-activating protein 1	59911.5	56417.6	85955.7	190439	168314	155610
P46063	P46063	RECQ1_HUMAN	RECQL	ATP-dependent DNA helicase Q1	140528	123017	131424	54565.9	63456.6	60877.6
P46379;P46379-2;P46379-3;P46379-5	P46379;P46379-2;P46379-3;P46379-4;P46379-5	BAG6_HUMAN	BAG6	Large proline-rich protein BAG6	47155.6	199462		224874	189139	206859
P46459	P46459;P46459-2	NSF_HUMAN	NSF	Vesicle-fusing ATPase	91193.4	78067	78161	118778	104665	94291.9
P46736;P46736-2;P46736-3	P46736;P46736-2;P46736-3;P46736-4	BRCC3_HUMAN	BRCC3	Lys-63-specific deubiquitinase BRCC36	101021	110631	101378	66864.1	58438.4	65954.7
P46776	P46776	RL27A_HUMAN	RPL27A	Large ribosomal subunit protein uL15	453354	447871	490805	329774	379685	356921
P46777	P46777	RL5_HUMAN	RPL5	Large ribosomal subunit protein uL18	305566	262246	264402	155882	178485	155313
P46778	P46778	RL21_HUMAN	RPL21	Large ribosomal subunit protein eL21	165336	195720	187129	143438	112076	122729
P46779;P46779-2;P46779-3	P46779;P46779-2;P46779-3;P46779-4;P46779-5	RL28_HUMAN	RPL28	Large ribosomal subunit protein eL28	109842	112808	95713.7	80738.8	74214.2	55645.5
P46781	P46781	RS9_HUMAN	RPS9	Small ribosomal subunit protein uS4	961100	1250000	951812	635637	708462	731288
P46782	P46782	RS5_HUMAN	RPS5	Small ribosomal subunit protein uS7	79856	86562	105430	116040	108796	100304
P46783	P46783	RS10_HUMAN	RPS10	Small ribosomal subunit protein eS10	39142.9	42324.1	31820	57103.1	41515.5	32438.5
P46934-4	P46934;P46934-3;P46934-4;P46934-2	NEDD4_HUMAN	NEDD4	Isoform 4 of E3 ubiquitin-protein ligase NEDD4	76606.5	68174	72815.4	54803.5	58835.5	53466.2
P46940	P46940	IQGA1_HUMAN	IQGAP1	Ras GTPase-activating-like protein IQGAP1	573420	618263	672580	1450000	1170000	1240000
P46977	P46977;P46977-2	STT3A_HUMAN	STT3A	Dolichyl-diphosphooligosaccharide--protein glycosyltransferase subunit STT3A	116343	113255	91731.3	60465.2	64564.1	65489.9
P47224	P47224	MSS4_HUMAN	RABIF	Guanine nucleotide exchange factor MSS4	38795.6	31260.3	21261.9	44812.7	56679.9	43222.9
P47755	P47755;P47755-2	CAZA2_HUMAN	CAPZA2	F-actin-capping protein subunit alpha-2	448176	485367	472256	377548	352475	309494
P47756	P47756	CAPZB_HUMAN	CAPZB	F-actin-capping protein subunit beta	321728	289729	360906	211049	219912	206069
P47897	P47897;P47897-2	SYQ_HUMAN	QARS1	Glutamine--tRNA ligase	180783	169762	186661	232783	252580	275451
P47914	P47914	RL29_HUMAN	RPL29	Large ribosomal subunit protein eL29	22907.4	23217.2	27765.8	21716.6	23444.1	32969.6
P47929	P47929	LEG7_HUMAN	LGALS7	Galectin-7				184605		193052
P47974	P47974	TISD_HUMAN	ZFP36L2	mRNA decay activator protein ZFP36L2				35021.5	32946.8	30099.7
P47985	P47985;P0C7P4	UCRI_HUMAN	UQCRFS1	Cytochrome b-c1 complex subunit Rieske, mitochondrial	188236	182205	194592	127927	106658	99143.4
P48147	P48147	PPCE_HUMAN	PREP	Prolyl endopeptidase	252980	233785	239442	198526	244842	197887
P48163	P48163	MAOX_HUMAN	ME1	NADP-dependent malic enzyme	195973	187451	190250	123101	140081	109399
P48200	P48200	IREB2_HUMAN	IREB2	Iron-responsive element-binding protein 2	42567.4	42887.8	50816.3	31791.1	27860.1	19853.9
P48426;P48426-2	P48426;P78356;P78356-2;P48426-2	PI42A_HUMAN	PIP4K2A	Phosphatidylinositol 5-phosphate 4-kinase type-2 alpha	59148.3	57347	63547.4	58761.8	56561.9	59800.4
P48444	P48444;P48444-2	COPD_HUMAN	ARCN1	Coatomer subunit delta	249713	269111	257243	265456	301962	265361
P48449;P48449-2	P48449;P48449-2	LSS_HUMAN	LSS	Lanosterol synthase	37927.7	42971.1	39579.7	39404.5	43280.9	36097.2
P48506	P48506	GSH1_HUMAN	GCLC	Glutamate--cysteine ligase catalytic subunit	83080.6	86968.5	78936.7	38496.5	51463.8	98968.8
P48556	P48556	PSMD8_HUMAN	PSMD8	26S proteasome non-ATPase regulatory subunit 8	130606	28469	111544	160346	110460	104997
P48637	P48637;P48637-2	GSHB_HUMAN	GSS	Glutathione synthetase	141311	130272	159183	68045.8	95067.7	64771.1
P48643	P48643;P48643-2	TCPE_HUMAN	CCT5	T-complex protein 1 subunit epsilon	315349	292892	295287	269805	277064	238393
P48729;P48729-3	P48729;Q8N752;P48729-2;P48729-3	KC1A_HUMAN	CSNK1A1	Casein kinase I isoform alpha	108795	95511.3	95018	84272.5	89274.9	77258.6
P48730;P48730-2;P49674	P48730;P48730-2;P49674	KC1D_HUMAN;KC1E_HUMAN	CSNK1D;CSNK1E	Casein kinase I isoform delta	42011.3	33186.4	46550.3	44074.1	30974.8	30065.8
P48735;P48735-2	P48735;P48735-2	IDHP_HUMAN	IDH2	Isocitrate dehydrogenase [NADP], mitochondrial	710788	729367	748321	1070000	1290000	1240000
P48739;P48739-2;P48739-3	P48739;P48739-2;P48739-3	PIPNB_HUMAN	PITPNB	Phosphatidylinositol transfer protein beta isoform	29378.5	43192.8	53015.3	101044	70337	88137.9
P48741	P17066;P48741	HSP77_HUMAN	HSPA7	Putative heat shock 70 kDa protein 7	2400000	2250000	2190000	2350000	2560000	2400000
P49005	P49005	DPOD2_HUMAN	POLD2	DNA polymerase delta subunit 2	104553	85091	81451.9	73424.9	65005.1	67254.8
P49023;P49023-2;P49023-3	P49023;P49023-2;P49023-3	PAXI_HUMAN	PXN	Paxillin	39160	44109.6	36729.8	138062	140368	139748
P49189;P49189-3	P49189;P49189-3	AL9A1_HUMAN	ALDH9A1	4-trimethylaminobutyraldehyde dehydrogenase	133654	112815	97513.5	63024.8	60094.3	58863.2
P49207	P49207	RL34_HUMAN	RPL34	Large ribosomal subunit protein eL34	414836	439176	340977	138949	158566	207104
P49257	P49257	LMAN1_HUMAN	LMAN1	Protein ERGIC-53	69340.9	76016	60242	73882.1	70784.8	65453.7
P49321;P49321-2;P49321-3;P49321-4	P49321;P49321-2;P49321-3;P49321-4	NASP_HUMAN	NASP	Nuclear autoantigenic sperm protein	8647.97			33983.3	45615.2	37181
P49327	P49327	FAS_HUMAN	FASN	Fatty acid synthase	3240000	3160000	3280000	2880000	2710000	2910000
P49368	P49368;P49368-2	TCPG_HUMAN	CCT3	T-complex protein 1 subunit gamma	162370	174109	182075	376027	384418	340954
P49406	P49406	RM19_HUMAN	MRPL19	Large ribosomal subunit protein bL19m	69701.4	52244.6	47985.3	29791.5	45364.6	29893.8
P49411	P49411	EFTU_HUMAN	TUFM	Elongation factor Tu, mitochondrial	658825	675803	701424	630004	660104	661271
P49419;P49419-2	P49419;P49419-2	AL7A1_HUMAN	ALDH7A1	Alpha-aminoadipic semialdehyde dehydrogenase	65837.3	58229.3	59446	86277.1	97304.6	106128
P49588	P49588;P49588-2	SYAC_HUMAN	AARS1	Alanine--tRNA ligase, cytoplasmic	266053	247923	250067	517742	575314	596299
P49589;P49589-2;P49589-3	P49589;P49589-2;P49589-3	SYCC_HUMAN	CARS1	Cysteine--tRNA ligase, cytoplasmic	57061.8	58227.7	54667.3	41305.9	37012.4	33293.8
P49591	P49591	SYSC_HUMAN	SARS1	Serine--tRNA ligase, cytoplasmic	513048	527868	561786	427827	503659	482491
P49643	P49643	PRI2_HUMAN	PRIM2	DNA primase large subunit	26226.8
P49711;P49711-2	P49711;P49711-2	CTCF_HUMAN	CTCF	Transcriptional repressor CTCF	35860	47198.5	42893.9	16294.9		20645
P49720	P49720	PSB3_HUMAN	PSMB3	Proteasome subunit beta type-3	906522	937911	952207	781648	818806	786371
P49721	P49721	PSB2_HUMAN	PSMB2	Proteasome subunit beta type-2	115822	101193	89474.2	46895.1	64819.2	64172.6
P49736	P49736	MCM2_HUMAN	MCM2	DNA replication licensing factor MCM2	307110	323906	343424	513776	512984	539049
P49748;P49748-3	P49748;P49748-3	ACADV_HUMAN	ACADVL	Very long-chain specific acyl-CoA dehydrogenase, mitochondrial	27605	34775.6	26933.4	31615.9	42126.1	34724.4
P49753;Q86TX2	P49753;Q86TX2	ACOT1_HUMAN;ACOT2_HUMAN	ACOT1;ACOT2	Acyl-coenzyme A thioesterase 2, mitochondrial	36062	26857.6	26130	12939.7	30207.7
P49755	P49755	TMEDA_HUMAN	TMED10	Transmembrane emp24 domain-containing protein 10	226398	237361	218679	49827.7	48173.2	56758.7
P49756	P49756	RBM25_HUMAN	RBM25	RNA-binding protein 25	24644.3	22380	31035.6	49322.5	53867.5	45422.4
P49773	P49773	HINT1_HUMAN	HINT1	Adenosine 5'-monophosphoramidase HINT1	134401	136871	133424	373702	367687	344484
P49792	P49792;Q99666;A6NKT7;O14715;Q7Z3J3;Q99666-2	RBP2_HUMAN	RANBP2	E3 SUMO-protein ligase RanBP2	14137.8	24243	29591.4	28985.3	11923.1	23251.4
P49821;P49821-2	P49821;P49821-2	NDUV1_HUMAN	NDUFV1	NADH dehydrogenase [ubiquinone] flavoprotein 1, mitochondrial			6652.18		11244.7
P49841;P49841-2	P49841;P49841-2	GSK3B_HUMAN	GSK3B	Glycogen synthase kinase-3 beta	73092.8	67839.6	80291.3	53415.3	60427.3	50488
P49902;P49902-2	P49902;P49902-2	5NTC_HUMAN	NT5C2	Cytosolic purine 5'-nucleotidase	141768	140369	132823	169512	202163	150022
P49903;P49903-3	P49903;P49903-2;P49903-3	SPS1_HUMAN	SEPHS1	Selenide, water dikinase 1	43669.4	36990.7	60859.1	94488.6	91344	84865.8
P49915	P49915;P49915-2	GUAA_HUMAN	GMPS	GMP synthase [glutamine-hydrolyzing]	194865	198641	193749	301970	309491	289079
P49959;P49959-2;P49959-3	P49959;P49959-2;P49959-3	MRE11_HUMAN	MRE11	Double-strand break repair protein MRE11	41704.6	52232	56253.5	75618.9	71407.1	73168.6
P50213	P50213;P50213-2	IDH3A_HUMAN	IDH3A	Isocitrate dehydrogenase [NAD] subunit alpha, mitochondrial	25688.8	31859.1	37952.6	135726	122223	118983
P50225;P50226	P0DMM9;P0DMN0;P50225;P50226;P0DMM9-3;P50225-2	ST1A1_HUMAN;ST1A2_HUMAN	SULT1A1;SULT1A2	Sulfotransferase 1A1	7203.91			37777.9	25653.2	22666.2
P50395	P50395;P50395-2	GDIB_HUMAN	GDI2	Rab GDP dissociation inhibitor beta	1380000	1410000	1490000	772256	836649	737582
P50454	P50454	SERPH_HUMAN	SERPINH1	Serpin H1	386289	394476	364498	305476	330924	250772
P50502;Q8IZP2	P50502;Q8IZP2	F10A1_HUMAN;ST134_HUMAN	ST13;ST13P4	Hsc70-interacting protein			37768.4	73755.1	93761.3	58413.3
P50552	P50552	VASP_HUMAN	VASP	Vasodilator-stimulated phosphoprotein	83981.3	81698.5	87783.2	138960	120096	123333
P50570;P50570-2;P50570-3;P50570-4;P50570-5	P50570;P50570-2;Q9UQ16;P50570-3;P50570-4;P50570-5;Q9UQ16-2;Q9UQ16-3;Q9UQ16-4;Q9UQ16-5	DYN2_HUMAN	DNM2	Dynamin-2	107065	108490	123259	239722	192581	167989
P50579;P50579-2;P50579-3	P50579;P50579-2;P50579-3	MAP2_HUMAN	METAP2	Methionine aminopeptidase 2	37100.7	19498.3	21131.2	69058.5	65218.6	56105
P50583	P50583	AP4A_HUMAN	NUDT2	Bis(5'-nucleosyl)-tetraphosphatase [asymmetrical]	63160.2	46792.9	71131.9	77322.3	80080.4	71253.3
P50851;P50851-2	P50851;P50851-2	LRBA_HUMAN	LRBA	Lipopolysaccharide-responsive and beige-like anchor protein	59216.4	55788.3	52914.2	80142.8	72090.2	51707.6
P50914	P50914	RL14_HUMAN	RPL14	Large ribosomal subunit protein eL14	205274	300095	247869	195858	184381	229969
P50990	P50990;P50990-2;P50990-3	TCPQ_HUMAN	CCT8	T-complex protein 1 subunit theta	255204	247840	287992	455011	430805	423810
P50991	P50991;P50991-2	TCPD_HUMAN	CCT4	T-complex protein 1 subunit delta	247415	279921	260875	546824	521654	502353
P50995;P50995-2	P50995;P50995-2	ANX11_HUMAN	ANXA11	Annexin A11	48515.1	44377.1	33967.9	241922	210460	231976
P51003;P51003-2	P51003;Q9NRJ5;P51003-2	PAPOA_HUMAN	PAPOLA	Poly(A) polymerase alpha	87082	83205.9	60014.3	90983.6	101651	96616.4
P51114;P51114-2;P51114-3	P51114;P51114-2;P51114-3	FXR1_HUMAN	FXR1	RNA-binding protein FXR1	41299.1
P51148;P51148-2	P20339;P51148;P61020;P51148-2;P20339-2;P61020-2	RAB5C_HUMAN	RAB5C	Ras-related protein Rab-5C	711665	652062	764571	323879	395183	308684
P51149	P51149	RAB7A_HUMAN	RAB7A	Ras-related protein Rab-7a	705567	658710	646720	484931	492693	438845
P51153	P51153	RAB13_HUMAN	RAB13	Ras-related protein Rab-13	71408.5	89822.5	67732.1	36156	45310.9	31335.5
P51398;P51398-2;P51398-3	P51398;P51398-2;P51398-3	RT29_HUMAN	DAP3	Small ribosomal subunit protein mS29			6817.6	41402	25314.3	28083.3
P51570	P51570	GALK1_HUMAN	GALK1	Galactokinase	124715	122104	134115	224172	231167	282991
P51571	P51571	SSRD_HUMAN	SSR4	Translocon-associated protein subunit delta	136857	141215	106057	40114.9	38201
P51572;P51572-2	P51572;P51572-2	BAP31_HUMAN	BCAP31	B-cell receptor-associated protein 31	33731	22887.4	23330.6	58536.2	49327.7	32790.1
P51580	P51580	TPMT_HUMAN	TPMT	Thiopurine S-methyltransferase				3458.34	30271.1	14270.5
P51610;P51610-2;P51610-4	P51610;P51610-2;P51610-4	HCFC1_HUMAN	HCFC1	Host cell factor 1	61639	59317.8	72852.6	89774.1	77967.1	78127
P51649;P51649-2	P51649;P51649-2	SSDH_HUMAN	ALDH5A1	Succinate-semialdehyde dehydrogenase, mitochondrial	81696.8	86544.5	95896.7	74141.8	77778.1	70725.8
P51659	P51659	DHB4_HUMAN	HSD17B4	Peroxisomal multifunctional enzyme type 2	556003	619781	609100	588631	829179	533139
P51665	P51665	PSMD7_HUMAN	PSMD7	26S proteasome non-ATPase regulatory subunit 7	49550.1	58634.1	45207.5	70721	102398	89762.2
P51784	P51784	UBP11_HUMAN	USP11	Ubiquitin carboxyl-terminal hydrolase 11	578488	554638	649594	21696.6	31921.7	22003.7
P51812	P51812;Q15349;Q15418;Q9UK32;Q15349-2;Q15349-3;Q15418-2;Q15418-3;Q15418-4;Q9UK32-2	KS6A3_HUMAN	RPS6KA3	Ribosomal protein S6 kinase alpha-3	437731	462233	490667	343796	491444	388134
P51965;P51965-2;P51965-3;Q969T4;Q96LR5	P51965;Q969T4;Q96LR5;P51965-2;P51965-3	UB2E1_HUMAN;UB2E2_HUMAN;UB2E3_HUMAN	UBE2E1;UBE2E2;UBE2E3	Ubiquitin-conjugating enzyme E2 E1	208321	189141	205236	178716	132687	130301
P51991;P51991-2	P51991;P51991-2	ROA3_HUMAN	HNRNPA3	Heterogeneous nuclear ribonucleoprotein A3	1260000	1300000	1430000	1120000	1330000	1460000
P52209;P52209-2	P52209;P52209-2	6PGD_HUMAN	PGD	6-phosphogluconate dehydrogenase, decarboxylating	359444	332146	315952	590817	724710	673432
P52272;P52272-2	P52272;P52272-2	HNRPM_HUMAN	HNRNPM	Heterogeneous nuclear ribonucleoprotein M	320771	224064	175049	1410000	1310000	1800000
P52292	P52292	IMA1_HUMAN	KPNA2	Importin subunit alpha-1	17544.6	21830.7	14117.8	157916	121847	137899
P52298;P52298-3	P52298;P52298-2;P52298-3	NCBP2_HUMAN	NCBP2	Nuclear cap-binding protein subunit 2	20607.7	24866.5		57473.4	62591.6	56902.3
P52306;P52306-4;P52306-5	P52306;P52306-5;P52306-4	GDS1_HUMAN	RAP1GDS1	Rap1 GTPase-GDP dissociation stimulator 1				44530.2	50790.8	30126.3
P52434;P52434-3	P52434;P52434-3;P52434-4	RPAB3_HUMAN	POLR2H	DNA-directed RNA polymerases I, II, and III subunit RPABC3	402452	390822	350719	313398	321030	346246
P52565	P52565;P52565-2	GDIR1_HUMAN	ARHGDIA	Rho GDP-dissociation inhibitor 1	520738	501914	528849	420234	408637	317033
P52597	P52597	HNRPF_HUMAN	HNRNPF	Heterogeneous nuclear ribonucleoprotein F	109835	141673	151437	380293	422836	473758
P52630;P52630-4	P52630;P52630-4	STAT2_HUMAN	STAT2	Signal transducer and activator of transcription 2	49144.3	50173.8	38947	77199.9	42546.5	31701.1
P52701;P52701-2	P52701;P52701-2	MSH6_HUMAN	MSH6	DNA mismatch repair protein Msh6	203396	256389	278977	204761	215755	302540
P52735;P52735-2;P52735-3	P52735;P52735-2;P52735-3	VAV2_HUMAN	VAV2	Guanine nucleotide exchange factor VAV2	69019.2	57382.6	59223.3	70567.6	51729.6	40575
P52788	P52788;P52788-2	SPSY_HUMAN	SMS	Spermine synthase	126883	114023	125164	129274	154759	122720
P52789	P52789	HXK2_HUMAN	HK2	Hexokinase-2	33545.6	26684.5	44357.2	81564.8	93099.3	89588.8
P52888	P52888	THOP1_HUMAN	THOP1	Thimet oligopeptidase	33374.4	27495	39494.1	50139.3	60722.5	51832
P52895	P42330;P52895;Q04828;P42330-2	AK1C2_HUMAN	AKR1C2	Aldo-keto reductase family 1 member C2	382813	330245	358820	284298	340547	312789
P52907	P47755;P52907;P47755-2	CAZA1_HUMAN	CAPZA1	F-actin-capping protein subunit alpha-1	871375	865547	975863	854226	921808	731632
P52943	P52943	CRIP2_HUMAN	CRIP2	Cysteine-rich protein 2	50651.2	37008.2	46299.6	387694	322072	478415
P53004	P53004	BIEA_HUMAN	BLVRA	Biliverdin reductase A	962362	884393	1070000	630972	669611	585856
P53041	P53041	PPP5_HUMAN	PPP5C	Serine/threonine-protein phosphatase 5	101130	112848	110874	66023.1	60262.1	73279.6
P53384;P53384-2	P53384;P53384-2	NUBP1_HUMAN	NUBP1	Cytosolic Fe-S cluster assembly factor NUBP1	25868.8	20630.7	20674.1	32035.9	36544.5	44212
P53396;P53396-2	P53396;P53396-2;P53396-3	ACLY_HUMAN	ACLY	ATP-citrate synthase	434708	452072	442505	451667	509558	539531
P53582	P53582	MAP11_HUMAN	METAP1	Methionine aminopeptidase 1	864244	1170000	1130000	1030000	1270000	1080000
P53597	P53597	SUCA_HUMAN	SUCLG1	Succinate--CoA ligase [ADP/GDP-forming] subunit alpha, mitochondrial	395392	433641	409708	302014	311361	278322
P53602	P53602	MVD1_HUMAN	MVD	Diphosphomevalonate decarboxylase	165363	177847	158984	67029.3	84459.7	73988.9
P53618	P53618	COPB_HUMAN	COPB1	Coatomer subunit beta	236729	222414	227778	264555	230698	221445
P53621;P53621-2	P53621;P53621-2	COPA_HUMAN	COPA	Coatomer subunit alpha	228987	221451	198077	216206	211177	184941
P53634	P53634	CATC_HUMAN	CTSC	Dipeptidyl peptidase 1	574123	463789	395256	251809	190683	309434
P53680	P53680;P53680-2	AP2S1_HUMAN	AP2S1	AP-2 complex subunit sigma	107604	115068	98828.1	151414	167168	126846
P53990;P53990-2;P53990-3;P53990-4;P53990-5	P53990;P53990-3;P53990-2;P53990-4;P53990-5	IST1_HUMAN	IST1	IST1 homolog				54350	39164.6	33160.6
P53992	P53992	SC24C_HUMAN	SEC24C	Protein transport protein Sec24C	234209	179800	139937	130759	122065	108577
P54105	P54105	ICLN_HUMAN	CLNS1A	Methylosome subunit pICln	21771.8	23418.8	23223.4	136750	198199	164877
P54136	P54136;P54136-2	SYRC_HUMAN	RARS1	Arginine--tRNA ligase, cytoplasmic	73773	79322.4	74404	266980	284011	294797
P54252;P54252-1;P54252-4	P54252;P54252-1;P54252-3;P54252-4	ATX3_HUMAN	ATXN3	Ataxin-3	1220000	701310	406652	67042.3	65513.2	37353.1
P54577	P54577	SYYC_HUMAN	YARS1	Tyrosine--tRNA ligase, cytoplasmic	102300	116055	111881	317587	323216	330804
P54578;P54578-2	P54578;P54578-2;P54578-3	UBP14_HUMAN	USP14	Ubiquitin carboxyl-terminal hydrolase 14	6500000	4200000	3530000	148543	135249	137273
P54619;P54619-2;P54619-3	P54619;P54619-2;P54619-3	AAKG1_HUMAN	PRKAG1	5'-AMP-activated protein kinase subunit gamma-1		43350.3	13080.6	21093.6	27082.9	21469.4
P54725;P54725-2;P54725-3	P54725;P54725-2;P54725-3	RD23A_HUMAN	RAD23A	UV excision repair protein RAD23 homolog A	287837	199191	122268	179260	164211	177774
P54727	P54725;P54727;P54725-2;P54725-3	RD23B_HUMAN	RAD23B	UV excision repair protein RAD23 homolog B	450542	235121	161474	287261	302906	284925
P54802	P54802	ANAG_HUMAN	NAGLU	Alpha-N-acetylglucosaminidase	39064.9	43738.7	62483.7	92959.6	108895	97232.2
P54886;P54886-2	P54886;P54886-2	P5CS_HUMAN	ALDH18A1	Delta-1-pyrroline-5-carboxylate synthase	377263	367948	338340	493992	321400	314563
P54920	P54920	SNAA_HUMAN	NAPA	Alpha-soluble NSF attachment protein	70707.4	76070.2		194419	163262	177715
P55010	P55010	IF5_HUMAN	EIF5	Eukaryotic translation initiation factor 5				78556.2	75605.5	91959.7
P55036;P55036-2	P55036;P55036-2	PSMD4_HUMAN	PSMD4	26S proteasome non-ATPase regulatory subunit 4	57223.6	31453.6		104834	115434	128902
P55039	P55039	DRG2_HUMAN	DRG2	Developmentally-regulated GTP-binding protein 2	22157.5	26747.8	27267.9	15093.3	19194.9
P55060;P55060-3	P55060;P55060-3;P55060-4	XPO2_HUMAN	CSE1L	Exportin-2	70953.8	73926.5	88934.4	743581	582575	556724
P55072	P55072	TERA_HUMAN	VCP	Transitional endoplasmic reticulum ATPase	406501	422101	511039	851269	993678	913943
P55084;P55084-2	P55084;P55084-2	ECHB_HUMAN	HADHB	Trifunctional enzyme subunit beta, mitochondrial	150739	142955	160971	112547	114436	85774.8
P55209;P55209-2;P55209-3	P55209;P55209-2;P55209-3	NP1L1_HUMAN	NAP1L1	Nucleosome assembly protein 1-like 1	255867	248350	228345	293975	352615	291335
P55210;P55210-3;P55210-4	P55210;P55210-3;P55210-4	CASP7_HUMAN	CASP7	Caspase-7	18765.7			32401.2	19666.7	38954.1
P55212	P55212;P55212-2	CASP6_HUMAN	CASP6	Caspase-6	115314	109064	75092.6	71099.9	60651	79493.2
P55263	P55263;P55263-2;P55263-3;P55263-4	ADK_HUMAN	ADK	Adenosine kinase	149927	145239	155658	53177.1	74984.1	58158.2
P55265;P55265-2;P55265-3;P55265-4;P55265-5	P55265;P55265-2;P55265-3;P55265-4;P55265-5	DSRAD_HUMAN	ADAR	Double-stranded RNA-specific adenosine deaminase	177785	182561	184028	191356	245536	326924
P55735;P55735-2;P55735-3;P55735-4	P55735;P55735-3;P55735-2;P55735-4	SEC13_HUMAN	SEC13	Protein SEC13 homolog	377491	338456	337988	158173	197992	191655
P55769	P55769	NH2L1_HUMAN	SNU13	NHP2-like protein 1				45514.4	40783.3	43544.9
P55786	P55786;A6NEC2;P55786-2	PSA_HUMAN	NPEPPS	Puromycin-sensitive aminopeptidase	357907	336454	361533	421287	468124	452062
P55795	P55795	HNRH2_HUMAN	HNRNPH2	Heterogeneous nuclear ribonucleoprotein H2	143520	160614	200796	284240	316024	335970
P55809	P55809;Q9BYC2;P55809-2	SCOT1_HUMAN	OXCT1	Succinyl-CoA:3-ketoacid coenzyme A transferase 1, mitochondrial	66425.1	64334.6	74815.3	62097.3	95274.4	72093
P55884;P55884-2	P55884;P55884-2	EIF3B_HUMAN	EIF3B	Eukaryotic translation initiation factor 3 subunit B	303939	305040	328217	320506	362653	330482
P56192	P56192;P56192-2	SYMC_HUMAN	MARS1	Methionine--tRNA ligase, cytoplasmic	147045	151699	144928	221659	233778	236094
P56270;P56270-2;P56270-3;Q14119;Q9HBE1;Q9HBE1-2;Q9HBE1-3;Q9HBE1-4	P56270;Q14119;Q9HBE1;Q9HBE1-4;P56270-2;P56270-3;Q9HBE1-2;Q9HBE1-3	MAZ_HUMAN;PATZ1_HUMAN;VEZF1_HUMAN	MAZ;PATZ1;VEZF1	Myc-associated zinc finger protein	51924.9	42514.5	60364.7	104765	74261.6	111859
P56537	P56537	IF6_HUMAN	EIF6	Eukaryotic translation initiation factor 6	151324	124743	91448.8	131773	108179	106589
P56545;P56545-2;P56545-3	P56545;P56545-3;Q13363;Q13363-2;P56545-2	CTBP2_HUMAN	CTBP2	C-terminal-binding protein 2	107859	110035	116165	81174.3	92241.5	94921.7
P57081;P57081-2	P57081;P57081-2	WDR4_HUMAN	WDR4	tRNA (guanine-N(7)-)-methyltransferase non-catalytic subunit WDR4	61511.8	60832.7	57771.9	16444.3		48536.4
P57735	P57735	RAB25_HUMAN	RAB25	Ras-related protein Rab-25	93676.6	109645	93679.4	58037.6	69956	40804.3
P57737;P57737-2;P57737-3;P57737-4	P57737;P57737-2;P57737-3;P57737-4	CORO7_HUMAN	CORO7	Coronin-7	56765.8	59674.1	71307.7	52228	64326.5	56836.8
P58107	P58107	EPIPL_HUMAN	EPPK1	Epiplakin	126904	112339	102645	395675	268051	255064
P58546	P58546	MTPN_HUMAN	MTPN	Myotrophin				60729.5	72147.6	76013.7
P59998;P59998-3	P59998;P59998-2;P59998-3	ARPC4_HUMAN	ARPC4	Actin-related protein 2/3 complex subunit 4	191146	211677	160003	91716.5	110085	67531.4
P60174;P60174-3	P60174;P60174-3;P60174-4	TPIS_HUMAN	TPI1	Triosephosphate isomerase	322396	340047	296963	554927	584908	569333
P60201	P60201;P60201-2	MYPR_HUMAN	PLP1	Myelin proteolipid protein	140289	130368	150909	173332	140143	187936
P60228	P60228	EIF3E_HUMAN	EIF3E	Eukaryotic translation initiation factor 3 subunit E	88122.5	77814	84649.8	266409	254810	243100
P60510	P60510	PP4C_HUMAN	PPP4C	Serine/threonine-protein phosphatase 4 catalytic subunit	163036	179184	147304	95826.8	109777	89777.5
P60520	P60520	GBRL2_HUMAN	GABARAPL2	Gamma-aminobutyric acid receptor-associated protein-like 2				28360.2		14418.6
P60660;P60660-2	P60660;P60660-2	MYL6_HUMAN	MYL6	Myosin light polypeptide 6	102267	92726.8	82191	548444	561568	584065
P60709;P63261	P60709;P63261	ACTB_HUMAN;ACTG_HUMAN	ACTB;ACTG1	Actin, cytoplasmic 1	27900000	24600000	26400000	19000000	22700000	19900000
P60842	P60842;Q14240;Q14240-2	IF4A1_HUMAN	EIF4A1	Eukaryotic initiation factor 4A-I	893677	962035	1010000	1110000	1060000	1010000
P60866;P60866-2	P60866;P60866-2	RS20_HUMAN	RPS20	Small ribosomal subunit protein uS10	228069	262141	305145	237591	246847	231830
P60891	P11908;P21108;P60891;P11908-2;P60891-2	PRPS1_HUMAN	PRPS1	Ribose-phosphate pyrophosphokinase 1	48346.6	60017	58036.5	86503.9	123402	92102.4
P60900	P60900;P60900-2;P60900-3	PSA6_HUMAN	PSMA6	Proteasome subunit alpha type-6	561768	523266	573796	380603	401213	379840
P60953	P60953;P60953-1	CDC42_HUMAN	CDC42	Cell division control protein 42 homolog	256233	207258	175194	136390	158168	147000
P60981;P60981-2	P60981;P60981-2	DEST_HUMAN	DSTN	Destrin	125982	100219	145620	378169	410751	402294
P60983	P60983	GMFB_HUMAN	GMFB	Glia maturation factor beta	61177.4	37381.9	66848.1	95873.3	113115	120234
P61006	O95716;P20336;P20337;P51153;P61006;Q92930;Q96E17;P61006-2	RAB8A_HUMAN	RAB8A	Ras-related protein Rab-8A	98283.5	82324.4	98087.4	75706.3	91094.3	82263.7
P61009	P61009	SPCS3_HUMAN	SPCS3	Signal peptidase complex subunit 3	88891.4	114112	108547	61265.2	99653.3	73788.9
P61011;P61011-2	P61011;P61011-2	SRP54_HUMAN	SRP54	Signal recognition particle subunit SRP54				114260	102082	142921
P61019	P61019;Q8WUD1	RAB2A_HUMAN	RAB2A	Ras-related protein Rab-2A	303155	314849	319186	243469	284332	221475
P61020;P61020-2	P61020;P61020-2	RAB5B_HUMAN	RAB5B	Ras-related protein Rab-5B	107506	94669.5	117211	49151.5	66892.6	33611.8
P61026	P61026	RAB10_HUMAN	RAB10	Ras-related protein Rab-10	695592	630910	623160	481395	538375	495516
P61077;P61077-2;P61077-3;P62837;P62837-2	P61077;P62837;P62837-2;P61077-2;P61077-3	UB2D2_HUMAN;UB2D3_HUMAN	UBE2D2;UBE2D3	Ubiquitin-conjugating enzyme E2 D3	276720	265103	266797	337619	308670	252010
P61081	P61081	UBC12_HUMAN	UBE2M	NEDD8-conjugating enzyme Ubc12	149453	174401	236141	708304	574774	717206
P61086	P61086;P61086-3	UBE2K_HUMAN	UBE2K	Ubiquitin-conjugating enzyme E2 K	39445.6	38359.7	25778.5	265250	158598	166944
P61088	P61088	UBE2N_HUMAN	UBE2N	Ubiquitin-conjugating enzyme E2 N	860797	843526	922966	904393	717059	669792
P61106	P61106	RAB14_HUMAN	RAB14	Ras-related protein Rab-14	281934	227529	236409	175879	198860	151550
P61158	P61158	ARP3_HUMAN	ACTR3	Actin-related protein 3	1510000	1240000	1410000	833813	896769	787424
P61160;P61160-2	P61160;P61160-2	ARP2_HUMAN	ACTR2	Actin-related protein 2	816811	732128	878887	557561	681059	529520
P61163	P42025;P61163	ACTZ_HUMAN	ACTR1A	Alpha-centractin	190876	210929	222162	148146	183650	151575
P61201;P61201-2	P61201;P61201-2	CSN2_HUMAN	COPS2	COP9 signalosome complex subunit 2	47675.3	51944.9	70935.3	241164	222590	221948
P61204;P84077	P61204;P84077;P61204-2	ARF1_HUMAN;ARF3_HUMAN	ARF1;ARF3	ADP-ribosylation factor 3	1270000	1060000	1380000	1000000	1260000	904308
P61221	P61221	ABCE1_HUMAN	ABCE1	ATP-binding cassette sub-family E member 1	156027	161272	160540	156881	168648	147542
P61225	P61225	RAP2B_HUMAN	RAP2B	Ras-related protein Rap-2b	44649	60822.1	40439.7		37802.9	39036.6
P61247	P61247	RS3A_HUMAN	RPS3A	Small ribosomal subunit protein eS1	191762	198136	240899	132092	172772	142419
P61254;Q9UNX3	P61254;Q9UNX3	RL26L_HUMAN;RL26_HUMAN	RPL26;RPL26L1	Large ribosomal subunit protein uL24	312167	377593	306617	202903	209364	208283
P61289;P61289-2;P61289-3	P61289;P61289-2;P61289-3	PSME3_HUMAN	PSME3	Proteasome activator complex subunit 3	67096.4	65452	97649.6	202830	199193	154370
P61313	P61313;P61313-2	RL15_HUMAN	RPL15	Large ribosomal subunit protein eL15	146592	143707	137895	92716.3	104827	110182
P61326;P61326-2;Q96A72	P61326;Q96A72;P61326-2	MGN2_HUMAN;MGN_HUMAN	MAGOH;MAGOHB	Protein mago nashi homolog	160747	213830	174767	219283	249623	188342
P61353	P61353	RL27_HUMAN	RPL27	Large ribosomal subunit protein eL27	881045	1050000	912416	561080	558234	596333
P61421	P61421	VA0D1_HUMAN	ATP6V0D1	V-type proton ATPase subunit d 1	23499.3		48444.3	45604.8	68126.2	43089.9
P61457	P61457	PHS_HUMAN	PCBD1	Pterin-4-alpha-carbinolamine dehydratase	41147.8	44456.6	36106.6	37817.2	27511.3	38668.3
P61513	P61513	RL37A_HUMAN	RPL37A	Large ribosomal subunit protein eL43	736820	796736	841525	839515	1060000	1180000
P61586	P08134;P61586;P62745	RHOA_HUMAN	RHOA	Transforming protein RhoA	311634	301297	327012	312175	330822	287658
P61599	P61599	NAA20_HUMAN	NAA20	N-alpha-acetyltransferase 20					15173.8
P61604	P61604	CH10_HUMAN	HSPE1	10 kDa heat shock protein, mitochondrial	177773	186859	191256	129209	138815	145553
P61758	P61758;P61758-2	PFD3_HUMAN	VBP1	Prefoldin subunit 3	55723.5	51781.9	69912.2	117156	117846	118783
P61769	P61769	B2MG_HUMAN	B2M	Beta-2-microglobulin	15740.3	5357.37	17667.4
P61923;P61923-4;P61923-5	P61923;P61923-4;P61923-5	COPZ1_HUMAN	COPZ1	Coatomer subunit zeta-1	23753.9	14416.6	12317.7	95035.8	138524	88114.4
P61956;P61956-2	P55854;P61956;Q6EEV6;P55854-2;P61956-2	SUMO2_HUMAN	SUMO2	Small ubiquitin-related modifier 2	110810	111027	98828.7	109584	115573	103602
P61962	P61962	DCAF7_HUMAN	DCAF7	DDB1- and CUL4-associated factor 7	642183	615220	617306	281325	298051	280420
P61964	P61964	WDR5_HUMAN	WDR5	WD repeat-containing protein 5	84673.9	64143.7	64034.3	72357.1	80397.9	66115.6
P61966;P61966-2	P61966;P61966-2	AP1S1_HUMAN	AP1S1	AP-1 complex subunit sigma-1A	29496.7	40855.7	34655.7	43445.6	33531.2	38285.7
P61970	P61970	NTF2_HUMAN	NUTF2	Nuclear transport factor 2	155675	142566	177617	195883	227260	214848
P61978-3	P61978;P61978-2;P61978-3	HNRPK_HUMAN	HNRNPK	Isoform 3 of Heterogeneous nuclear ribonucleoprotein K	312755	280658	317012	3000000	3160000	4110000
P61981	P61981	1433G_HUMAN	YWHAG	14-3-3 protein gamma	547756	576755	536079	1370000	1450000	1350000
P62068;P62068-3;P62068-4	P62068;P62068-2;P62068-3;P62068-4	UBP46_HUMAN	USP46	Ubiquitin carboxyl-terminal hydrolase 46	324980	335492	420269
P62081	P62081	RS7_HUMAN	RPS7	Small ribosomal subunit protein eS7	319665	399100	397489	301927	367209	272258
P62136	P36873;P62136;P62140;P36873-2;P62136-2;P62136-3	PP1A_HUMAN	PPP1CA	Serine/threonine-protein phosphatase PP1-alpha catalytic subunit	339369	351668	319027	280511	298648	237410
P62140	P62140	PP1B_HUMAN	PPP1CB	Serine/threonine-protein phosphatase PP1-beta catalytic subunit	108432	87766.1	107733	94484.7	81636	77753.4
P62191	P62191;P62191-2	PRS4_HUMAN	PSMC1	26S proteasome regulatory subunit 4	157982	162239	191473	335502	297911	305345
P62195;P62195-2	P62195;P62195-2	PRS8_HUMAN	PSMC5	26S proteasome regulatory subunit 8	161203	155426	148270	210949	201412	191113
P62241	P62241	RS8_HUMAN	RPS8	Small ribosomal subunit protein eS8	1450000	1570000	1670000	939058	1050000	1050000
P62244	P62244	RS15A_HUMAN	RPS15A	Small ribosomal subunit protein uS8	626997	635063	713220	464688	504569	492562
P62249	P62249	RS16_HUMAN	RPS16	Small ribosomal subunit protein uS9	192664	276761	244032	215937	281624	238962
P62253	P62253	UB2G1_HUMAN	UBE2G1	Ubiquitin-conjugating enzyme E2 G1				57355.3	59272.8	41146.1
P62258-2	P62258;P62258-2	1433E_HUMAN	YWHAE	Isoform SV of 14-3-3 protein epsilon	393712	495884	453562	1170000	1290000	1040000
P62263	P62263	RS14_HUMAN	RPS14	Small ribosomal subunit protein uS11	645496	623542	812260	342963	415875	418314
P62266	P62266	RS23_HUMAN	RPS23	Small ribosomal subunit protein uS12	559204	657577	628430	302069	322184	331104
P62269	P62269	RS18_HUMAN	RPS18	Small ribosomal subunit protein uS13	529110	598510	638285	490408	585738	514580
P62273;P62273-2	P62273;P62273-2	RS29_HUMAN	RPS29	Small ribosomal subunit protein uS14	28359.8	41161.5	47231.4	41305.6	88661.1	69872.5
P62277	P62277	RS13_HUMAN	RPS13	Small ribosomal subunit protein uS15	605531	719313	760410	494270	603889	567250
P62280	P62280	RS11_HUMAN	RPS11	Small ribosomal subunit protein uS17	421687	438653	432048	224785	259397	215062
P62306	P62306	RUXF_HUMAN	SNRPF	Small nuclear ribonucleoprotein F	90088.2	111926	81118.4	71200.3	69113.7	39945.7
P62314	P62314	SMD1_HUMAN	SNRPD1	Small nuclear ribonucleoprotein Sm D1	110983	117123	94960.1	60727.9	80647.3	58896.6
P62316;P62316-2	P62316;P62316-2	SMD2_HUMAN	SNRPD2	Small nuclear ribonucleoprotein Sm D2	71456.9	68114.9	77838.7	84914.7	105712	100259
P62318;P62318-2	P62318;P62318-2	SMD3_HUMAN	SNRPD3	Small nuclear ribonucleoprotein Sm D3	49231.8	73826.3	51596.9	71722.6	80624.7	70194.4
P62330	P62330	ARF6_HUMAN	ARF6	ADP-ribosylation factor 6	292267	297464	298698	365598	324360	277625
P62333	P62333	PRS10_HUMAN	PSMC6	26S proteasome regulatory subunit 10B	110547	121952	124552	257718	258626	265278
P62424	P62424	RL7A_HUMAN	RPL7A	Large ribosomal subunit protein eL8	91429.9	83241.4	93289	51347.1	58222.5	63816.8
P62487	P62487	RPB7_HUMAN	POLR2G	DNA-directed RNA polymerase II subunit RPB7	15401.1	20853.1	7453.8		29949.9
P62491;P62491-2;Q15907;Q15907-2	P62491;Q15907;P62491-2;Q15907-2	RB11A_HUMAN;RB11B_HUMAN	RAB11A;RAB11B	Ras-related protein Rab-11A	272171	275616	292466	185582	200067	129683
P62495;P62495-2	P62495;P62495-2	ERF1_HUMAN	ETF1	Eukaryotic peptide chain release factor subunit 1	118875	130460	123964	216727	223574	198533
P62701	P62701;Q8TD47	RS4X_HUMAN	RPS4X	Small ribosomal subunit protein eS4, X isoform	341378	358804	415581	327834	357419	331136
P62714;P67775	P62714;P67775;P67775-2	PP2AA_HUMAN;PP2AB_HUMAN	PPP2CA;PPP2CB	Serine/threonine-protein phosphatase 2A catalytic subunit beta isoform	645308	648714	687097	493609	553386	472643
P62736	P62736;P63267;P68032;P68133	ACTA_HUMAN	ACTA2	Actin, aortic smooth muscle	2880000	2340000	2770000	2080000	2350000	2090000
P62750	P62750	RL23A_HUMAN	RPL23A	Large ribosomal subunit protein uL23	231630	251147	298295	170858	228367	206834
P62753	P62753	RS6_HUMAN	RPS6	Small ribosomal subunit protein eS6	151752	189530	190275	126020	126187	122091
P62805	P62805	H4_HUMAN	H4C1	Histone H4	839448	927676	958140	1100000	1010000	1200000
P62820	P62820;Q9H0U4;P62820-2	RAB1A_HUMAN	RAB1A	Ras-related protein Rab-1A	620195	626836	599753	457086	522060	536470
P62826	P62826	RAN_HUMAN	RAN	GTP-binding nuclear protein Ran	5600000	5520000	5150000	3610000	4330000	3460000
P62829	P62829	RL23_HUMAN	RPL23	Large ribosomal subunit protein uL14	672757	706570	728665	460530	511734	512135
P62834	P61224;P62834;A6NIZ1;P61224-2;P61224-3	RAP1A_HUMAN	RAP1A	Ras-related protein Rap-1A	384169	377217	360693	212099	247784	227686
P62841	P62841	RS15_HUMAN	RPS15	Small ribosomal subunit protein uS19	82791.4	67025.6	101199	71787.1	93615.3	97777.3
P62847;P62847-2;P62847-3;P62847-4	P62847;P62847-2;P62847-3;P62847-4	RS24_HUMAN	RPS24	Small ribosomal subunit protein eS24	104429	109971	87491.7	45701	48961	52973.5
P62851	P62851	RS25_HUMAN	RPS25	Small ribosomal subunit protein eS25	105417	119868	142749	107704	141580	118722
P62854;Q5JNZ5	P62854;Q5JNZ5	RS26L_HUMAN;RS26_HUMAN	RPS26;RPS26P11	Small ribosomal subunit protein eS26	163058	174514	185181	143309	169052	172839
P62857	P62857	RS28_HUMAN	RPS28	Small ribosomal subunit protein eS28	58513	64773.1	78857.1	287477	300915	265127
P62861	P62861	RS30_HUMAN	FAU	Ubiquitin-like FUBI-ribosomal protein eS30 fusion protein	51822.4	63002.6	66444.7	104313	86091.7	64873.9
P62879	P16520;P62873;P62879;P16520-2;P62873-2	GBB2_HUMAN	GNB2	Guanine nucleotide-binding protein G(I)/G(S)/G(T) subunit beta-2	1450000	1560000	1320000	521331	588278	462216
P62899;P62899-2;P62899-3	P62899;P62899-2;P62899-3	RL31_HUMAN	RPL31	Large ribosomal subunit protein eL31	313749	382783	348580	260123	314538	298318
P62906	P62906	RL10A_HUMAN	RPL10A	Large ribosomal subunit protein uL1	401814	393254	424879	320780	312419	270242
P62910	P62910	RL32_HUMAN	RPL32	Large ribosomal subunit protein eL32	62920	100895	66773.7	39539.1	75807.6	62855.5
P62913;P62913-2	P62913;P62913-2	RL11_HUMAN	RPL11	Large ribosomal subunit protein uL5	486033	497466	548220	233227	303808	236390
P62917	P62917	RL8_HUMAN	RPL8	Large ribosomal subunit protein uL2	927781	1020000	955810	612982	656593	727163
P62937	P62937	PPIA_HUMAN	PPIA	Peptidyl-prolyl cis-trans isomerase A	832140	877662	973438	1560000	1680000	1690000
P62942	P62942	FKB1A_HUMAN	FKBP1A	Peptidyl-prolyl cis-trans isomerase FKBP1A	25813.2	23992.7		259506	261599	264799
P62993	P62993;P62993-2	GRB2_HUMAN	GRB2	Growth factor receptor-bound protein 2	54322.8	64209.7	65497.8	89744.4	96025.8	94258.4
P62995;P62995-3	P62995;P62995-3	TRA2B_HUMAN	TRA2B	Transformer-2 protein homolog beta	158425	136049	144315	160908	246970	222491
P63010;P63010-2	P63010;P63010-2;P63010-3	AP2B1_HUMAN	AP2B1	AP-2 complex subunit beta	103669	113372	128093	228961	210287	214356
P63092;P63092-2;P63092-3;P63092-4;Q5JWF2;Q5JWF2-2	P38405;P63092;Q5JWF2;P63092-2;P63092-3;P63092-4;Q5JWF2-2;P38405-2	GNAS1_HUMAN;GNAS2_HUMAN	GNAS	Guanine nucleotide-binding protein G(s) subunit alpha isoforms short	63877.8	68759.4	60060.3	128768	116089	105467
P63104	P63104;P63104-2	1433Z_HUMAN	YWHAZ	14-3-3 protein zeta/delta	318838	373781	322482	769687	744624	745211
P63151;P63151-2	P63151;P63151-2	2ABA_HUMAN	PPP2R2A	Serine/threonine-protein phosphatase 2A 55 kDa regulatory subunit B alpha isoform	473886	543955	510546	443367	523881	480004
P63165	G2XKQ0;P63165	SUMO1_HUMAN	SUMO1	Small ubiquitin-related modifier 1	2640000	1420000	661164	6530000	5990000	4090000
P63167	P63167;Q96FJ2	DYL1_HUMAN	DYNLL1	Dynein light chain 1, cytoplasmic	142107	190542	194931	484618	453026	425435
P63208	P63208;P63208-2	SKP1_HUMAN	SKP1	S-phase kinase-associated protein 1	49404.2		38814.7	105764	107615	77451.3
P63241;P63241-2	P63241;Q9GZV4;Q6IS14;P63241-2	IF5A1_HUMAN	EIF5A	Eukaryotic translation initiation factor 5A-1	520853	618779	775070	2540000	2580000	2520000
P63244	P63244	RACK1_HUMAN	RACK1	Small ribosomal subunit protein RACK1	1690000	1570000	1520000	1280000	1480000	1320000
P63279	P63279	UBC9_HUMAN	UBE2I	SUMO-conjugating enzyme UBC9	75408.2	75413.8	54083.6	651679	620177	705403
P67809	P16989;P67809;Q9Y2T7;P16989-2;P16989-3	YBOX1_HUMAN	YBX1	Y-box-binding protein 1	1200000	1170000	1290000	1130000	1280000	1380000
P67812;P67812-2;P67812-3;P67812-4	P67812;P67812-2;P67812-3;P67812-4	SC11A_HUMAN	SEC11A	Signal peptidase complex catalytic subunit SEC11A	141684	176323	148901	77460.4	69759.7	72811.7
P67870	P67870	CSK2B_HUMAN	CSNK2B	Casein kinase II subunit beta	189506	191055	266849	95222.6	101614	86759.4
P67936	P07951;P67936;P07951-2;P07951-3;P67936-2	TPM4_HUMAN	TPM4	Tropomyosin alpha-4 chain	158990	182467	151575	435798	327598	348234
P68036;P68036-2;P68036-3	P68036;A0A1B0GUS4;P68036-2;P68036-3	UB2L3_HUMAN	UBE2L3	Ubiquitin-conjugating enzyme E2 L3	112632	110293	164602	413694	364115	311134
P68104;Q5VTE0	P68104;Q5VTE0	EF1A1_HUMAN;EF1A3_HUMAN	EEF1A1;EEF1A1P5	Elongation factor 1-alpha 1	2590000	2570000	2690000	4680000	4360000	4320000
P68366;P68366-2	P0DPH7;P0DPH8;P68363;P68366;Q6PEY2;Q71U36;Q9BQE3;Q9NY65;P0DPH7-2;P68363-2;P68366-2;Q71U36-2;Q9NY65-2	TBA4A_HUMAN	TUBA4A	Tubulin alpha-4A chain	9510000	9530000	9770000	13400000	10500000	10200000
P68371	P68371;Q13885;Q9BVA1	TBB4B_HUMAN	TUBB4B	Tubulin beta-4B chain	2420000	2510000	2670000	3680000	2380000	2440000
P68400	P68400;Q8NEV1	CSK21_HUMAN	CSNK2A1	Casein kinase II subunit alpha	233683	239189	236192	115934	149914	93911.1
P68402	P68402	PA1B2_HUMAN	PAFAH1B2	Platelet-activating factor acetylhydrolase IB subunit alpha2	235280	202283	203715	476963	462893	461735
P68431;P84243;Q16695;Q71DI3	P68431;P84243;Q16695;Q6NXT2;Q71DI3;Q5TEC6	H31T_HUMAN;H31_HUMAN;H32_HUMAN;H33_HUMAN	H3-3A;H3-4;H3C1;H3C15	Histone H3.1	332711	372092	402336	493515	519126	576856
P78344;P78344-2	P78344;P78344-2	IF4G2_HUMAN	EIF4G2	Eukaryotic translation initiation factor 4 gamma 2				91777.1	61924.9	65749.7
P78347;P78347-2;P78347-3;P78347-4	P78347;P78347-2;P78347-3;P78347-4	GTF2I_HUMAN	GTF2I	General transcription factor II-I	612171	657013	779670	613166	469263	483278
P78356	P78356;P78356-2	PI42B_HUMAN	PIP4K2B	Phosphatidylinositol 5-phosphate 4-kinase type-2 beta		59546.6	80454.5	56963.9	53268.4	55846.9
P78362;P78362-2	P78362;P78362-2	SRPK2_HUMAN	SRPK2	SRSF protein kinase 2	15203.7	21463.8		28310.7	29156	25556.9
P78371	P78371;P78371-2	TCPB_HUMAN	CCT2	T-complex protein 1 subunit beta	223250	232702	231780	626193	602036	528590
P78406	P78406	RAE1L_HUMAN	RAE1	mRNA export factor RAE1	137280	137126	116602	112704	120900	135257
P78417;P78417-3	P78417;P78417-3	GSTO1_HUMAN	GSTO1	Glutathione S-transferase omega-1	28630	44273.4	38908.3	62015.9	74515.9	50567.3
P78527;P78527-2	P78527;P78527-2	PRKDC_HUMAN	PRKDC	DNA-dependent protein kinase catalytic subunit	19243.4	16649.5	33531.7	71909.8	53947.9	56369.8
P80404	P80404	GABT_HUMAN	ABAT	4-aminobutyrate aminotransferase, mitochondrial	165499	153054	163173	111370	159536	141729
P81605	P81605	DCD_HUMAN	DCD	Dermcidin	74112.5	96405.4	63878.4	100607	55432.8	48015.3
P82664	P82664	RT10_HUMAN	MRPS10	Small ribosomal subunit protein uS10m	54267.7	71592.3	68016.9	46761.6	55763.6	57204.9
P82675	P82675	RT05_HUMAN	MRPS5	Small ribosomal subunit protein uS5m	52052.2	43522.3	41117.9	28996.6	22621.5	20611
P82912;P82912-2;P82912-3	P82912;P82912-2;P82912-3	RT11_HUMAN	MRPS11	Small ribosomal subunit protein uS11m	20641.2			20604.5		32186.1
P82930	P82930	RT34_HUMAN	MRPS34	Small ribosomal subunit protein mS34	28762.2	33273.8	26510.3	26265.8	26778.3	19729.9
P82933	P82933	RT09_HUMAN	MRPS9	Small ribosomal subunit protein uS9m	25043.4	9626.39	16662.3	14049.4	22572.3	13023.2
P83436	P83436	COG7_HUMAN	COG7	Conserved oligomeric Golgi complex subunit 7				38287.2	19507.2
P83731	P83731	RL24_HUMAN	RPL24	Large ribosomal subunit protein eL24	232116	228132	239501	147966	163869	167731
P83881	P83881	RL36A_HUMAN	RPL36A	Large ribosomal subunit protein eL42	12690.7	20144.6	16086.3
P84085	P84085	ARF5_HUMAN	ARF5	ADP-ribosylation factor 5	1670000	1510000	1600000	1210000	1650000	1350000
P84090	P84090	ERH_HUMAN	ERH	Enhancer of rudimentary homolog	79217.4	75143.8	88987	42019.7	65020	49443.6
P84098	P84098	RL19_HUMAN	RPL19	Large ribosomal subunit protein eL19	128739	135912	156919	112915	93504.8	136175
P84103;P84103-2	P84103;P84103-2	SRSF3_HUMAN	SRSF3	Serine/arginine-rich splicing factor 3	246266	273160	320553	371444	425511	374407
P98179	P98179	RBM3_HUMAN	RBM3	RNA-binding protein 3	54118.4	52222.3	62179.1	118155	63393.4	67485.5
P99999	P99999	CYC_HUMAN	CYCS	Cytochrome c	99947.4	85440.4	97807.3	92292	79591.1	100104
Q00325;Q00325-2	Q00325;Q00325-2	S25A3_HUMAN	SLC25A3	Solute carrier family 25 member 3	96175.4	98989.2	83463.9	76548.4	47467.5	59439.8
Q00341	Q00341;Q00341-2	VIGLN_HUMAN	HDLBP	Vigilin	30300.3	30096.3	24290.5	238409	219058	238890
Q00535	Q00535;Q00535-2	CDK5_HUMAN	CDK5	Cyclin-dependent kinase 5	28136.3	25303.9	21038.1	24516.9	15189.2	16253.9
Q00577	Q00577	PURA_HUMAN	PURA	Transcriptional activator protein Pur-alpha	47594.9	42848.1	37398.1	122207	117906	109277
Q00610;Q00610-2	P53675;Q00610;P53675-2;Q00610-2	CLH1_HUMAN	CLTC	Clathrin heavy chain 1	1260000	1300000	1300000	1830000	2190000	2070000
Q00688	Q00688	FKBP3_HUMAN	FKBP3	Peptidyl-prolyl cis-trans isomerase FKBP3	8724.25	37383.8		93539.7	96861.5	94322.4
Q00796	Q00796	DHSO_HUMAN	SORD	Sorbitol dehydrogenase	119503	114377	114343	38718.3	41300.9
Q00839	Q00839;Q00839-2	HNRPU_HUMAN	HNRNPU	Heterogeneous nuclear ribonucleoprotein U	2620000	2350000	2390000	1630000	2080000	2590000
Q01081;Q01081-2;Q01081-4	Q01081;Q01081-2;Q01081-4	U2AF1_HUMAN	U2AF1	Splicing factor U2AF 35 kDa subunit	67209.9	64154.1	71088.7	66766.1	71361.8	65438.2
Q01082;Q01082-2;Q01082-3	Q01082;Q01082-2;Q01082-3	SPTB2_HUMAN	SPTBN1	Spectrin beta chain, non-erythrocytic 1	37369.8	47450.6	51580.1	183124	135529	128678
Q01085;Q01085-2	P31483;Q01085;Q01085-2;P31483-2;P31483-3	TIAR_HUMAN	TIAL1	Nucleolysin TIAR	120525	135987	124637	255770	276321	291451
Q01105-2	P0DME0;Q01105;Q01105-2;Q01105-3;Q01105-4	SET_HUMAN	SET	Isoform 2 of Protein SET	318480	352308	423623	291466	326846	344687
Q01130	Q01130	SRSF2_HUMAN	SRSF2	Serine/arginine-rich splicing factor 2	57338.9	70985.4	102987	138758	155233	93747.8
Q01433;Q01433-2;Q01433-5	Q01433;Q01433-2;Q01433-3;Q01433-4;Q01433-5	AMPD2_HUMAN	AMPD2	AMP deaminase 2	54646.8	68480.3	67336.5	66341	76557.9	72352
Q01469	Q01469	FABP5_HUMAN	FABP5	Fatty acid-binding protein 5	82689.9		64094.3	123220	84421.5	105193
Q01518;Q01518-2	P40123;Q01518;P40123-2;P40123-3;Q01518-2	CAP1_HUMAN	CAP1	Adenylyl cyclase-associated protein 1	418644	409684	407213	407066	369987	321705
Q01581	Q01581	HMCS1_HUMAN	HMGCS1	Hydroxymethylglutaryl-CoA synthase, cytoplasmic	64943.2	52475.9	72286.3	46821.2	53136.8	50970.5
Q01780;Q01780-2	Q01780;Q01780-2	EXOSX_HUMAN	EXOSC10	Exosome component 10	44677.8	47254.8	50527.6	36358.7	31945.1	19067.1
Q01804	Q01804;Q01804-3;Q01804-5	OTUD4_HUMAN	OTUD4	OTU domain-containing protein 4	202350	135397	119194	72753.8	77246	65497.5
Q01813	Q01813;Q01813-2	PFKAP_HUMAN	PFKP	ATP-dependent 6-phosphofructokinase, platelet type	701356	666747	728882	908980	854692	916660
Q01968;Q01968-2	Q01968;Q01968-2	OCRL_HUMAN	OCRL	Inositol polyphosphate 5-phosphatase OCRL	102972	97596.5	69189	41115.9	31031.5	37936.8
Q02218;Q02218-2	Q02218;Q02218-2	ODO1_HUMAN	OGDH	2-oxoglutarate dehydrogenase complex component E1	277935	261880	269776	159762	205007	189898
Q02252;Q02252-2	Q02252;Q02252-2	MMSA_HUMAN	ALDH6A1	Methylmalonate-semialdehyde dehydrogenase [acylating], mitochondrial	156605	184115	157529	129642	130127	119834
Q02413	Q02413	DSG1_HUMAN	DSG1	Desmoglein-1	119574	240215	77846.1	224558	100372	76407.6
Q02543	Q02543	RL18A_HUMAN	RPL18A	Large ribosomal subunit protein eL20	221153	243821	171016	72528	97136.1	99459.3
Q02750;Q02750-2	Q02750;Q02750-2	MP2K1_HUMAN	MAP2K1	Dual specificity mitogen-activated protein kinase kinase 1	46983.6	49923.7	53338.7	111878	84414.5	91972
Q02790	Q02790	FKBP4_HUMAN	FKBP4	Peptidyl-prolyl cis-trans isomerase FKBP4	112219	134190	131542	948700	1100000	996502
Q02809;Q02809-2	Q02809;Q02809-2	PLOD1_HUMAN	PLOD1	Procollagen-lysine,2-oxoglutarate 5-dioxygenase 1	126181	110167	126430	106201	107784	114698
Q02878	Q02878	RL6_HUMAN	RPL6	Large ribosomal subunit protein eL6	73630.2	61366.3	65860.4	37524.9	40725.7	37773.3
Q03252	Q03252	LMNB2_HUMAN	LMNB2	Lamin-B2	13832.7		26464.1	48036	45570.7
Q03426	Q03426	KIME_HUMAN	MVK	Mevalonate kinase	39228.5	39419.6	32816.9	56223.5	53969.1	27575.2
Q03468	Q03468	ERCC6_HUMAN	ERCC6	DNA excision repair protein ERCC-6	26709.4	41915.7	44997.8	25892.8	24907.6
Q04206;Q04206-2;Q04206-3	Q04206;Q04206-2;Q04206-3;Q04206-4	TF65_HUMAN	RELA	Transcription factor p65	250211	218360	183232	132560	144021	131554
Q04323;Q04323-2	Q04323;Q04323-2	UBXN1_HUMAN	UBXN1	UBX domain-containing protein 1	28143.8	25604.5	23791	187169	154492	158259
Q04446	Q04446	GLGB_HUMAN	GBE1	1,4-alpha-glucan-branching enzyme	145838	147657	151215	93881.1	120152	99414
Q04637;Q04637-3;Q04637-4;Q04637-5;Q04637-6;Q04637-7;Q04637-8;Q04637-9	Q04637;Q04637-9;Q04637-3;Q04637-4;Q04637-5;Q04637-6;Q04637-7;Q04637-8	IF4G1_HUMAN	EIF4G1	Eukaryotic translation initiation factor 4 gamma 1	99761.5	54789.1	103964	623080	499109	547756
Q04695	Q04695	K1C17_HUMAN	KRT17	Keratin, type I cytoskeletal 17	23168.6	30957.3	47351.4	41673.1	137634	94461.8
Q04726;Q04726-2;Q04726-3;Q04726-4;Q04726-5;Q04726-6;Q04726-7	Q04726;Q04726-4;Q04726-2;Q04726-3;Q04726-5;Q04726-6;Q04726-7	TLE3_HUMAN	TLE3	Transducin-like enhancer protein 3	56102.2	35853.7	41779.7	42164.1	41405.8	34195.3
Q04760;Q04760-2	Q04760;Q04760-2	LGUL_HUMAN	GLO1	Lactoylglutathione lyase	20089.2	97001.1	29368.5	76031.3	62596.7	133734
Q04837	Q04837	SSBP_HUMAN	SSBP1	Single-stranded DNA-binding protein, mitochondrial	76802.1	56971.8	50587.4	41765.1	14202.9	45653.1
Q04864;Q04864-2	Q04864;Q04864-2	REL_HUMAN	REL	Proto-oncogene c-Rel	51224	43094.7	42678.2	19684.5	23553.6
Q04917	Q04917	1433F_HUMAN	YWHAH	14-3-3 protein eta	46357.7	35009.5	42599.9	181783	173249	161899
Q05048	Q05048	CSTF1_HUMAN	CSTF1	Cleavage stimulation factor subunit 1	217279	188854	170986	78825.7	91427.2	68916.3
Q05086;Q05086-2;Q05086-3	Q05086;Q05086-2;Q05086-3	UBE3A_HUMAN	UBE3A	Ubiquitin-protein ligase E3A	282347	206181	120584	90187.4	124491	90342.7
Q05209	Q05209;Q05209-2;Q05209-3	PTN12_HUMAN	PTPN12	Tyrosine-protein phosphatase non-receptor type 12	36543.9		45319.5	65349.9	75148.4	51812.5
Q05639	Q05639	EF1A2_HUMAN	EEF1A2	Elongation factor 1-alpha 2	4690000	5100000	5070000	6540000	6180000	5750000
Q05655;Q05655-2	Q05655;Q05655-2	KPCD_HUMAN	PRKCD	Protein kinase C delta type	71780.8	79299.6	73116.6	50298.3	51181.6	47845.6
Q05BV3;Q05BV3-5	Q05BV3;Q05BV3-5	EMAL5_HUMAN	EML5	Echinoderm microtubule-associated protein-like 5			1210000
Q06124-1	Q06124;Q06124-1;Q06124-3	PTN11_HUMAN	PTPN11	Isoform 2 of Tyrosine-protein phosphatase non-receptor type 11	222483	221784	228962	220684	193799	180340
Q06203	Q06203	PUR1_HUMAN	PPAT	Amidophosphoribosyltransferase	174135	165538	156355	82773.9	85794	77779.1
Q06210;Q06210-2	Q06210;Q06210-2	GFPT1_HUMAN	GFPT1	Glutamine--fructose-6-phosphate aminotransferase [isomerizing] 1	398898	381653	369838	264943	279063	225045
Q06323	Q06323;Q06323-2;Q06323-3	PSME1_HUMAN	PSME1	Proteasome activator complex subunit 1		16552.1	17969.2	157604	84460	105213
Q06830	Q06830	PRDX1_HUMAN	PRDX1	Peroxiredoxin-1	1260000	1290000	1490000	1240000	1270000	1210000
Q07020;Q07020-2	Q07020;Q07020-2	RL18_HUMAN	RPL18	Large ribosomal subunit protein eL18	123604	169311	135047	54008.4	65207.5	94440.8
Q07021	Q07021	C1QBP_HUMAN	C1QBP	Complement component 1 Q subcomponent-binding protein, mitochondrial	363774	374981	405350	363508	452022	354062
Q07666;Q07666-2	Q07666;Q07666-2;Q07666-3	KHDR1_HUMAN	KHDRBS1	KH domain-containing, RNA-binding, signal transduction-associated protein 1	81626.9	94003.5	78124.1	537246	717391	813067
Q07812;Q07812-2;Q07812-5;Q07812-7;Q07812-8	Q07812;Q07812-8;Q07812-2;Q07812-5;Q07812-7	BAX_HUMAN	BAX	Apoptosis regulator BAX				153975	89673.4	76792.7
Q07866;Q07866-10;Q07866-2;Q07866-3;Q07866-4;Q07866-5;Q07866-6;Q07866-7;Q07866-8;Q07866-9	Q07866;Q9H0B6;Q07866-10;Q07866-2;Q07866-3;Q07866-4;Q07866-5;Q07866-6;Q07866-7;Q07866-8;Q07866-9;Q9H0B6-2	KLC1_HUMAN	KLC1	Kinesin light chain 1	16248.5	16703.5	23884.9	153927	160819	164623
Q07955	Q07955;Q07955-2;Q07955-3	SRSF1_HUMAN	SRSF1	Serine/arginine-rich splicing factor 1	291224	357172	411995	2770000	3300000	3280000
Q07960	Q07960	RHG01_HUMAN	ARHGAP1	Rho GTPase-activating protein 1	29653.2	18893.2	17956	235158	229319	168252
Q08170	Q08170	SRSF4_HUMAN	SRSF4	Serine/arginine-rich splicing factor 4	42682.7	54148.7	58278.4	38339.6	53290.9	44230.1
Q08209;Q08209-2;Q08209-3	P16298;P48454;Q08209;Q08209-2;P16298-2;P16298-3;P16298-4;P48454-2;P48454-3;Q08209-3;Q08209-5	PP2BA_HUMAN	PPP3CA	Protein phosphatase 3 catalytic subunit alpha	70940.3	89967.6	77449.9	79473.5	85086.4	76836.2
Q08211	Q08211	DHX9_HUMAN	DHX9	ATP-dependent RNA helicase A	1090000	1140000	1000000	779740	820079	1120000
Q08257	Q08257;Q08257-2	QOR_HUMAN	CRYZ	Quinone oxidoreductase	64627.1	76168.7	51838.2	51454.4	81351.7	40939.5
Q08380	Q08380	LG3BP_HUMAN	LGALS3BP	Galectin-3-binding protein	74470.3	109713	86808.8	40242.5	64892.8	39636.2
Q08554;Q08554-2	Q08554;Q08554-2	DSC1_HUMAN	DSC1	Desmocollin-1	66789.5	106533	47954.7	102853	58435.8	51442
Q08722;Q08722-2;Q08722-3;Q08722-4	Q08722;Q08722-3;Q08722-2;Q08722-4	CD47_HUMAN	CD47	Leukocyte surface antigen CD47	63155.3	73977.6	69444	74361.5	50862.4	82099.2
Q08752	Q08752	PPID_HUMAN	PPID	Peptidyl-prolyl cis-trans isomerase D				58079	75971	66809.4
Q08945	Q08945	SSRP1_HUMAN	SSRP1	FACT complex subunit SSRP1		10079.2		14896.5	13617.6
Q08AM6	Q08AM6	VAC14_HUMAN	VAC14	Protein VAC14 homolog	5092.93			30598.4	33995.5	33553.6
Q08J23	Q08J23	NSUN2_HUMAN	NSUN2	RNA cytosine C(5)-methyltransferase NSUN2	90867.4	90298.7	94563.1	96246.1	116598	130371
Q09028;Q09028-3	Q09028;Q09028-2;Q09028-3;Q09028-4	RBBP4_HUMAN	RBBP4	Histone-binding protein RBBP4	438109	392727	421695	355309	331587	304352
Q09161	Q09161	NCBP1_HUMAN	NCBP1	Nuclear cap-binding protein subunit 1				45011.1	40564.6	44007.9
Q09666	Q09666	AHNK_HUMAN	AHNAK	Neuroblast differentiation-associated protein AHNAK	105417	116776	140186	228032	285868	227685
Q0VDF9	Q0VDF9	HSP7E_HUMAN	HSPA14	Heat shock 70 kDa protein 14	37084.6	37958.4	33572.9	41786.4	37825.3	44046.5
Q10567;Q10567-2;Q10567-3;Q10567-4	Q10567;Q10567-3;Q10567-2;Q10567-4	AP1B1_HUMAN	AP1B1	AP-1 complex subunit beta-1	80621.8	89668.2	97822.1	338841	257377	264005
Q10570	Q10570	CPSF1_HUMAN	CPSF1	Cleavage and polyadenylation specificity factor subunit 1	39586.4	33386.1	26580.4	32867.9	28489.4	28255.2
Q10713	Q10713;Q10713-2	MPPA_HUMAN	PMPCA	Mitochondrial-processing peptidase subunit alpha	208088	219982	203921	141386	151325	147093
Q12765;Q12765-2	Q12765;Q12765-2	SCRN1_HUMAN	SCRN1	Secernin-1	362829	321319	331669	153316	192638	190862
Q12792;Q12792-3	Q12792;Q6IBS0;Q12792-3;Q12792-4	TWF1_HUMAN	TWF1	Twinfilin-1	157367	165360	133383	102557	150411	109703
Q12849;Q12849-5	Q12849;Q12849-5	GRSF1_HUMAN	GRSF1	G-rich sequence factor 1	14866.6		18334.5	80900.9	69890.7	79240.5
Q12874	Q12874	SF3A3_HUMAN	SF3A3	Splicing factor 3A subunit 3	11551.8	18750.5				55743.6
Q12899	Q12899	TRI26_HUMAN	TRIM26	Tripartite motif-containing protein 26	33831.4	43425.8	21421.4	21856.6	22804.1	15980.6
Q12904;Q12904-2	Q12904;Q12904-2	AIMP1_HUMAN	AIMP1	Aminoacyl tRNA synthase complex-interacting multifunctional protein 1	47614.4	56216.9	53097.8	105545	131113	119444
Q12905	Q12905	ILF2_HUMAN	ILF2	Interleukin enhancer-binding factor 2	52262.8	71165.9	56800.9	171184	146457	198901
Q12906-7	Q12906;Q96SI9;Q12906-2;Q12906-3;Q12906-4;Q12906-5;Q12906-6;Q12906-7;Q96SI9-2	ILF3_HUMAN	ILF3	Isoform 7 of Interleukin enhancer-binding factor 3	833112	827144	926649	696992	895034	984401
Q12907	Q12907	LMAN2_HUMAN	LMAN2	Vesicular integral-membrane protein VIP36	392996	312362	380596	323469	253379	243565
Q12931	Q12931;Q12931-2	TRAP1_HUMAN	TRAP1	Heat shock protein 75 kDa, mitochondrial	203829	220925	226417	434094	389736	359542
Q12933;Q12933-2;Q12933-3;Q12933-4	Q12933;Q12933-2;Q12933-3;Q12933-4	TRAF2_HUMAN	TRAF2	TNF receptor-associated factor 2	96934.1	92089.9	75374.1	86940.1	46857	71210.1
Q12955;Q12955-4;Q12955-5	Q12955;Q12955-4;Q12955-5;Q12955-6;Q12955-7	ANK3_HUMAN	ANK3	Ankyrin-3	34474.6	37208.7	31256.2	49837.8	44303.3	70471.1
Q12965	Q12965	MYO1E_HUMAN	MYO1E	Unconventional myosin-Ie	31351.5	34546.3	39104.9	20279.5	24489.2	13073.5
Q13033;Q13033-2	Q13033;Q13033-2	STRN3_HUMAN	STRN3	Striatin-3	102953	102995	139784	86910.9	81501.9	62628.3
Q13045;Q13045-2	Q13045;Q13045-2;Q13045-3	FLII_HUMAN	FLII	Protein flightless-1 homolog	203169	191993	187943	199124	133256	179924
Q13057;Q13057-2	Q13057;Q13057-2	COASY_HUMAN	COASY	Bifunctional coenzyme A synthase	10656.3	32079.7	31080.7	46945.5	31449.7	19471.7
Q13085;Q13085-2;Q13085-3;Q13085-4	Q13085;Q13085-2;Q13085-3;Q13085-4	ACACA_HUMAN	ACACA	Acetyl-CoA carboxylase 1	121901	127352	136987	170133	162428	174798
Q13098;Q13098-5;Q13098-7	Q13098;Q13098-5;Q13098-6;Q13098-7	CSN1_HUMAN	GPS1	COP9 signalosome complex subunit 1	24955.5	25915.4	37261.2	135784	109913	112037
Q13107	Q13107;Q13107-2;Q13107-3	UBP4_HUMAN	USP4	Ubiquitin carboxyl-terminal hydrolase 4	4300000	4800000	5590000	119078	78080.2	73461.1
Q13131;Q13131-2	Q13131;Q13131-2	AAPK1_HUMAN	PRKAA1	5'-AMP-activated protein kinase catalytic subunit alpha-1	69020.5	61582.5	55527	59203	52186.3	38890.4
Q13136;Q13136-2	Q13136;Q13136-2	LIPA1_HUMAN	PPFIA1	Liprin-alpha-1	23436.5	33125.2		60339.6	26868.6	38538.5
Q13137;Q13137-2;Q13137-3;Q13137-4	Q13137;Q13137-2;Q13137-3;Q13137-4;Q13137-5	CACO2_HUMAN	CALCOCO2	Calcium-binding and coiled-coil domain-containing protein 2	193075	174543	189411	167594	146086	133210
Q13144	Q13144	EI2BE_HUMAN	EIF2B5	Translation initiation factor eIF-2B subunit epsilon	45515.5	36671.7	30792.7	36328	46313.9	39614.7
Q13148	Q13148	TADBP_HUMAN	TARDBP	TAR DNA-binding protein 43	166837	162575	192781	259482	207291	283451
Q13151	Q13151	ROA0_HUMAN	HNRNPA0	Heterogeneous nuclear ribonucleoprotein A0	933004	902634	902801	615104	629836	688923
Q13155	Q13155;Q13155-2	AIMP2_HUMAN	AIMP2	Aminoacyl tRNA synthase complex-interacting multifunctional protein 2	106858	109614	99832.7	110275	121070	109925
Q13158	Q13158	FADD_HUMAN	FADD	FAS-associated death domain protein				115010	89995	75769.4
Q13162	Q13162	PRDX4_HUMAN	PRDX4	Peroxiredoxin-4	913409	916195	890513	575211	780690	740190
Q13177	Q13177	PAK2_HUMAN	PAK2	Serine/threonine-protein kinase PAK 2	44359.7	48491.5	58020.9	309359	195667	198211
Q13185	Q13185	CBX3_HUMAN	CBX3	Chromobox protein homolog 3		15129.9		86327.4	68359.2	67592.6
Q13200	Q13200;Q13200-2;Q13200-3	PSMD2_HUMAN	PSMD2	26S proteasome non-ATPase regulatory subunit 2	292361	261171	286709	219081	224803	221048
Q13228;Q13228-4	Q13228;Q13228-2;Q13228-3;Q13228-4	SBP1_HUMAN	SELENBP1	Methanethiol oxidase	573046	506907	506318	277126	300054	252729
Q13242	Q13242	SRSF9_HUMAN	SRSF9	Serine/arginine-rich splicing factor 9	331733	398745	488480	609442	742448	785191
Q13243	Q13243;Q13243-2	SRSF5_HUMAN	SRSF5	Serine/arginine-rich splicing factor 5		22637.6		51613	34468.2	50719.2
Q13247;Q13247-3	Q08170;Q13247;Q13247-2;Q13247-3	SRSF6_HUMAN	SRSF6	Serine/arginine-rich splicing factor 6	421807	492493	493748	642980	709886	746929
Q13257	Q13257	MD2L1_HUMAN	MAD2L1	Mitotic spindle assembly checkpoint protein MAD2A	66842.3	66779.1	69975.6	104364	91482.5	62482
Q13263	Q13263;Q13263-2	TIF1B_HUMAN	TRIM28	Transcription intermediary factor 1-beta	92992	98658.4	93334.1	1030000	879614	847196
Q13283	Q13283;Q13283-2	G3BP1_HUMAN	G3BP1	Ras GTPase-activating protein-binding protein 1	10810.7	23977.9	19964.9	52588.8	54323.3	43183.5
Q13287	Q13287	NMI_HUMAN	NMI	N-myc-interactor	27883.5	23061.5	22348.4
Q13310;Q13310-2;Q13310-3	Q13310;Q13310-2;Q13310-3	PABP4_HUMAN	PABPC4	Polyadenylate-binding protein 4	57410.2	64283	67707.8	58316.7	77000	79462.7
Q13347	Q13347	EIF3I_HUMAN	EIF3I	Eukaryotic translation initiation factor 3 subunit I	905759	871992	756471	425692	490892	410137
Q13363;Q13363-2	Q13363;Q13363-2	CTBP1_HUMAN	CTBP1	C-terminal-binding protein 1	52803.7	49772.4	51807.4	133722	144583	146596
Q13371	P20941;Q13371;P20941-3	PHLP_HUMAN	PDCL	Phosducin-like protein	39092.4	26355.5	41877.3	45196.3	44657.3	53121.8
Q13404;Q13404-1;Q13404-2;Q13404-7	Q13404;Q13404-1;Q13404-2;Q13404-6;Q13404-7	UB2V1_HUMAN	UBE2V1	Ubiquitin-conjugating enzyme E2 variant 1	278100	273997	302723	513332	373579	389301
Q13409;Q13409-2;Q13409-3;Q13409-5;Q13409-6;Q13409-7	Q13409;Q13409-3;Q13409-2;Q13409-5;Q13409-6;Q13409-7	DC1I2_HUMAN	DYNC1I2	Cytoplasmic dynein 1 intermediate chain 2	258998	187593	207722	107527	119128	99154.2
Q13435	Q13435	SF3B2_HUMAN	SF3B2	Splicing factor 3B subunit 2		15190.1		70688.4	61599.3	77115.6
Q13439;Q13439-3;Q13439-4;Q13439-5	Q13439;Q13439-3;Q13439-4;Q13439-5	GOGA4_HUMAN	GOLGA4	Golgin subfamily A member 4				18716.4		14744.1
Q13451	Q13451	FKBP5_HUMAN	FKBP5	Peptidyl-prolyl cis-trans isomerase FKBP5	29589.8	28518.8	29067.2	129697	126501	133265
Q13485	Q13485	SMAD4_HUMAN	SMAD4	Mothers against decapentaplegic homolog 4	28442.8	25369.7	18762	23245.2	23195.1	11153.5
Q13509	Q13509;Q9BUF5;Q13509-2	TBB3_HUMAN	TUBB3	Tubulin beta-3 chain	1290000	1210000	1250000	1340000	1210000	1340000
Q13526	Q13526	PIN1_HUMAN	PIN1	Peptidyl-prolyl cis-trans isomerase NIMA-interacting 1				106643	115497	121579
Q13546	Q13546;Q13546-2	RIPK1_HUMAN	RIPK1	Receptor-interacting serine/threonine-protein kinase 1	34485.5	39122.8	36644.7	28031.3	21087.3
Q13547	Q13547	HDAC1_HUMAN	HDAC1	Histone deacetylase 1	225984	199138	218555	166672	157763	96017.5
Q13554;Q13554-2;Q13554-3;Q13554-4;Q13554-5;Q13554-6;Q13554-7;Q13554-8;Q13555;Q13555-10;Q13555-11;Q13555-2;Q13555-3;Q13555-4;Q13555-5;Q13555-6;Q13555-7;Q13555-8;Q13555-9;Q13557;Q13557-10;Q13557-11;Q13557-12;Q13557-3;Q13557-4;Q13557-5;Q13557-6;Q13557-8;Q13557-9	Q13554;Q13554-3;Q13555;Q13555-5;Q13557;Q13557-8;Q13554-2;Q13554-4;Q13554-5;Q13554-6;Q13554-7;Q13554-8;Q13555-10;Q13555-11;Q13555-2;Q13555-3;Q13555-4;Q13555-6;Q13555-7;Q13555-8;Q13555-9;Q13557-10;Q13557-11;Q13557-12;Q13557-3;Q13557-4;Q13557-5;Q13557-6;Q13557-9	KCC2B_HUMAN;KCC2D_HUMAN;KCC2G_HUMAN	CAMK2B;CAMK2D;CAMK2G	Calcium/calmodulin-dependent protein kinase type II subunit beta			13956.5	9296.64	33406.8
Q13564;Q13564-2;Q13564-3;Q13564-4	Q13564;Q13564-2;Q13564-3;Q13564-4	ULA1_HUMAN	NAE1	NEDD8-activating enzyme E1 regulatory subunit	65039	50363.7	47758.1	20417.6	33027.1	23843.6
Q13569	Q13569	TDG_HUMAN	TDG	G/T mismatch-specific thymine DNA glycosylase	34270.1	33627.2	26108.5		23775.4	21988.6
Q13572;Q13572-2	Q13572;Q13572-2	ITPK1_HUMAN	ITPK1	Inositol-tetrakisphosphate 1-kinase	81837.3	81169.9	59810.3	196637	130327	139010
Q13595;Q13595-2;Q13595-3;Q13595-4	Q13595;Q13595-2;Q13595-3;Q13595-4	TRA2A_HUMAN	TRA2A	Transformer-2 protein homolog alpha	16196.8	12750.9	4145.71		17238.5	20980.2
Q13596;Q13596-2	Q13596;Q13596-2;Q13596-3	SNX1_HUMAN	SNX1	Sorting nexin-1				87788.7	74192.1	86061.2
Q13610	Q13610	PWP1_HUMAN	PWP1	Periodic tryptophan protein 1 homolog	53428.8	49714.5	45893.4		23770	18518.9
Q13616	Q13616	CUL1_HUMAN	CUL1	Cullin-1	82296.6	91774.7	95904.4	107474	116815	98843.4
Q13617;Q13617-2	Q13617;Q13617-2	CUL2_HUMAN	CUL2	Cullin-2	115379	100783	91004.8	99574.6	83909.6	103284
Q13618;Q13618-2	Q13618;Q13618-2	CUL3_HUMAN	CUL3	Cullin-3	151158	145112	153230	216866	235312	198187
Q13619	Q13619;Q13619-2	CUL4A_HUMAN	CUL4A	Cullin-4A	37231.2	23518.3	36285.8	24507.1
Q13620;Q13620-1;Q13620-3	Q13620;Q13620-1;Q13620-3	CUL4B_HUMAN	CUL4B	Cullin-4B	38782.3	45868.9	42632.1	63624.8	54882.3	46460.4
Q13630	Q13630	FCL_HUMAN	GFUS	GDP-L-fucose synthase	267116	235958	279955	105212	178163	133532
Q13636	Q13636	RAB31_HUMAN	RAB31	Ras-related protein Rab-31	15696.3	8910.65	14286.5	41698.1	46497.5	39252
Q13685	Q13685	AAMP_HUMAN	AAMP	Angio-associated migratory cell protein	29350.3	23193.1	14724.8	35750.3	50962.5	54425.2
Q13724;Q13724-2	Q13724;Q13724-2	MOGS_HUMAN	MOGS	Mannosyl-oligosaccharide glucosidase	11867.6	12457.5	24550.4	20603.1	36165.2	17413.1
Q13813;Q13813-2	Q13813;Q13813-2;Q13813-3	SPTN1_HUMAN	SPTAN1	Spectrin alpha chain, non-erythrocytic 1	47381.9	61849.1	50845.2	148881	120848	126723
Q13838;Q13838-2	Q13838;Q13838-2	DX39B_HUMAN	DDX39B	Spliceosome RNA helicase DDX39B	1320000	1230000	1150000	1420000	1160000	1230000
Q13867	Q13867	BLMH_HUMAN	BLMH	Bleomycin hydrolase	38811.1	57202.4	23496.3	68704.7	53289.5	50898
Q13885	Q13885;Q9BVA1	TBB2A_HUMAN	TUBB2A	Tubulin beta-2A chain	173308	200895	214798	294592	222329	246539
Q13907	Q13907;Q13907-2	IDI1_HUMAN	IDI1	Isopentenyl-diphosphate Delta-isomerase 1	411282	384194	427787	225063	203042	241294
Q14019	Q14019	COTL1_HUMAN	COTL1	Coactosin-like protein	204088	179434	200995	155684	199442	161340
Q14103;Q14103-3	Q14103;Q14103-4;Q14103-2;Q14103-3	HNRPD_HUMAN	HNRNPD	Heterogeneous nuclear ribonucleoprotein D0	578133	618845	674980	1160000	1360000	1550000
Q14139;Q14139-2	Q14139;Q14139-2	UBE4A_HUMAN	UBE4A	Ubiquitin conjugation factor E4 A	10473.7			48504.8	36079.2	36682
Q14145	Q14145	KEAP1_HUMAN	KEAP1	Kelch-like ECH-associated protein 1	95268	129116	121286		9150.92
Q14149	Q14149	MORC3_HUMAN	MORC3	MORC family CW-type zinc finger protein 3		14483.3	11981.4			22347.7
Q14151	Q14151	SAFB2_HUMAN	SAFB2	Scaffold attachment factor B2	17298.9	33159.3	28739.9	8949.65	23516.2	21664.7
Q14152;Q14152-2	Q14152;Q14152-2	EIF3A_HUMAN	EIF3A	Eukaryotic translation initiation factor 3 subunit A	103177	113076	133750	207682	233979	219745
Q14155;Q14155-1;Q14155-2;Q14155-3;Q14155-5;Q14155-6	Q14155;Q14155-1;Q14155-2;Q14155-3;Q14155-5;Q14155-6	ARHG7_HUMAN	ARHGEF7	Rho guanine nucleotide exchange factor 7				11702.8
Q14160;Q14160-3	Q14160;Q9BTT6;Q14160-3;Q9BTT6-2	SCRIB_HUMAN	SCRIB	Protein scribble homolog	101062	77064.6	117738	172154	122681	123154
Q14166	Q14166	TTL12_HUMAN	TTLL12	Tubulin--tyrosine ligase-like protein 12	101361	89099.8	86853.9	56913.4	67476.9	65941.2
Q14181;Q14181-2	Q14181;Q14181-2	DPOA2_HUMAN	POLA2	DNA polymerase alpha subunit B	70729.2	76631.8	87755.1	66114.8	55662.6	74361.4
Q14203;Q14203-2;Q14203-3;Q14203-4;Q14203-5;Q14203-6	Q14203;Q14203-5;Q14203-2;Q14203-3;Q14203-4;Q14203-6	DCTN1_HUMAN	DCTN1	Dynactin subunit 1	58966.8	53041.8	52752.8	204593	128060	151005
Q14204	Q14204	DYHC1_HUMAN	DYNC1H1	Cytoplasmic dynein 1 heavy chain 1	196344	176531	169802	371367	260886	239032
Q14240;Q14240-2	Q14240;Q14240-2	IF4A2_HUMAN	EIF4A2	Eukaryotic initiation factor 4A-II	104960	99717.8	108738	151181	136169	122934
Q14247	Q14247;Q14247-3	SRC8_HUMAN	CTTN	Src substrate cortactin	177948	174235	214549	292114	326369	303736
Q14257;Q14257-2	Q14257;Q14257-2	RCN2_HUMAN	RCN2	Reticulocalbin-2	280376	279589	241806	256987	298188	247850
Q14258	Q14258	TRI25_HUMAN	TRIM25	E3 ubiquitin/ISG15 ligase TRIM25	190868	175583	167031	166548	125296	159910
Q14344	Q14344;Q14344-2	GNA13_HUMAN	GNA13	Guanine nucleotide-binding protein subunit alpha-13	27670.3	40713.2	36777.7	32246.8	23330.6	32711.3
Q14376;Q14376-2	Q14376;Q14376-2	GALE_HUMAN	GALE	UDP-glucose 4-epimerase	21577.9	22124	20657.7	25976	26990.2	25505
Q14558;Q14558-2	Q14558;Q14558-2	KPRA_HUMAN	PRPSAP1	Phosphoribosyl pyrophosphate synthase-associated protein 1	35573.8	34108	45968.2	49363.8	61377.7	64546.7
Q14566	Q14566	MCM6_HUMAN	MCM6	DNA replication licensing factor MCM6	266153	242348	255377	298734	321421	325095
Q14624;Q14624-2;Q14624-3	Q14624;Q14624-2;Q14624-3	ITIH4_HUMAN	ITIH4	Inter-alpha-trypsin inhibitor heavy chain H4	25014.5	21761.9	47965.3	27943.4	84626.8	46794.4
Q14651	Q14651	PLSI_HUMAN	PLS1	Plastin-1	22354.9	37530.4	44669.6	94770.6	85663	86249.1
Q14653;Q14653-4	Q14653;Q14653-4	IRF3_HUMAN	IRF3	Interferon regulatory factor 3	75954	98989.9	56189.2	113005	99554.6	63078.9
Q14671;Q14671-2;Q14671-3;Q14671-4;Q8TB72;Q8TB72-2;Q8TB72-3;Q8TB72-4	Q14671;Q8TB72;Q14671-2;Q14671-3;Q14671-4;Q8TB72-2;Q8TB72-3;Q8TB72-4	PUM1_HUMAN;PUM2_HUMAN	PUM1;PUM2	Pumilio homolog 1				19483.9	11783.5	17265.1
Q14683	Q14683	SMC1A_HUMAN	SMC1A	Structural maintenance of chromosomes protein 1A	36306.7	76523	53737.4	46085.5	55991.6	51779.4
Q14694;Q14694-2;Q14694-3	Q14694;Q14694-2;Q14694-3	UBP10_HUMAN	USP10	Ubiquitin carboxyl-terminal hydrolase 10	636056	389136	294389	94441.9	54702.5	62562.2
Q14696	Q14696	MESD_HUMAN	MESD	LRP chaperone MESD	58050.5	73949.3	67788.6	154066	153910	97193.5
Q14697-2	Q14697;Q14697-2	GANAB_HUMAN	GANAB	Isoform 2 of Neutral alpha-glucosidase AB	1980000	1840000	1780000	1270000	1530000	1510000
Q14764	Q14764	MVP_HUMAN	MVP	Major vault protein	60863.3	70518.8		87872	84284.3	86982.8
Q14847;Q14847-2	Q14847;Q14847-2;Q14847-3	LASP1_HUMAN	LASP1	LIM and SH3 domain protein 1	22634.2	18160.9	19394.7	153719	150537	161332
Q14914;Q14914-2	Q14914;Q14914-2	PTGR1_HUMAN	PTGR1	Prostaglandin reductase 1	90241.2	65308.8	55455.9	17335
Q14974	Q14974	IMB1_HUMAN	KPNB1	Importin subunit beta-1	126998	130588	132510	478956	414927	404978
Q14980;Q14980-2;Q14980-3;Q14980-4	Q14980;Q14980-3;Q14980-4;Q14980-2	NUMA1_HUMAN	NUMA1	Nuclear mitotic apparatus protein 1				55176.5	28561.5	38463.2
Q14C86;Q14C86-2;Q14C86-3;Q14C86-4;Q14C86-5;Q14C86-6	Q14C86;Q14C86-2;Q14C86-3;Q14C86-4;Q14C86-5;Q14C86-6	GAPD1_HUMAN	GAPVD1	GTPase-activating protein and VPS9 domain-containing protein 1				122662	90491.1	86019.2
Q14CX7;Q14CX7-2	Q14CX7;Q14CX7-2	NAA25_HUMAN	NAA25	N-alpha-acetyltransferase 25, NatB auxiliary subunit	348849	326989	259745	306743	413147	476632
Q15003	Q15003	CND2_HUMAN	NCAPH	Condensin complex subunit 2	55582.1	52387.2	51842.6	41553.6	37256.3	36468.1
Q15005	Q15005	SPCS2_HUMAN	SPCS2	Signal peptidase complex subunit 2	143700	135344	110849	115529	110879	74232.5
Q15008;Q15008-4	Q15008;Q15008-2;Q15008-3;Q15008-4	PSMD6_HUMAN	PSMD6	26S proteasome non-ATPase regulatory subunit 6	71550.9	81709.4	70719	321961	279841	254664
Q15019;Q15019-2;Q15019-3	Q15019;Q15019-3;Q15019-2	SEPT2_HUMAN	SEPTIN2	Septin-2	180907	191552	202369	209641	202799	139486
Q15020	Q15020;Q15020-4	SART3_HUMAN	SART3	Squamous cell carcinoma antigen recognized by T-cells 3	65343.2	75587.8	75996.5	121774	155673	168234
Q15024	Q15024	EXOS7_HUMAN	EXOSC7	Exosome complex component RRP42	62494	55342.1	51157.1	53028.8	58016	41156.5
Q15029;Q15029-2;Q15029-3	Q15029;Q15029-2;Q15029-3	U5S1_HUMAN	EFTUD2	116 kDa U5 small nuclear ribonucleoprotein component	192808	178960	183032	134615	146489	123294
Q15036	Q15036	SNX17_HUMAN	SNX17	Sorting nexin-17	26728.9	25237.5	17601.4		12176.2
Q15046;Q15046-2	Q15046;Q15046-2	SYK_HUMAN	KARS1	Lysine--tRNA ligase	224809	226286	215641	193759	216337	178285
Q15047;Q15047-3	Q15047;Q15047-3	SETB1_HUMAN	SETDB1	Histone-lysine N-methyltransferase SETDB1	34104.1	34196.8	28405.8	40199.8	34287.2	30572.8
Q15056	Q15056;Q15056-2	IF4H_HUMAN	EIF4H	Eukaryotic translation initiation factor 4H	16575.5	9641.21		209038	172983	192514
Q15075	Q15075	EEA1_HUMAN	EEA1	Early endosome antigen 1				17982	18471.8	26468.3
Q15084;Q15084-2;Q15084-3;Q15084-4;Q15084-5	Q15084;Q15084-2;Q15084-3;Q15084-4;Q15084-5	PDIA6_HUMAN	PDIA6	Protein disulfide-isomerase A6	130463	143180	153231	267168	268778	280405
Q15102	Q15102	PA1B3_HUMAN	PAFAH1B3	Platelet-activating factor acetylhydrolase IB subunit alpha1	81991.6	89478.9	77781.3	91363.2	85563.2	74738.6
Q15126	Q15126	PMVK_HUMAN	PMVK	Phosphomevalonate kinase				57522.3	36760.8	37205.4
Q15149;Q15149-2;Q15149-4;Q15149-5;Q15149-6;Q15149-7;Q15149-8;Q15149-9	Q15149;Q15149-2;Q15149-3;Q15149-4;Q15149-5;Q15149-6;Q15149-7;Q15149-8;Q15149-9	PLEC_HUMAN	PLEC	Plectin	405513	384668	430491	2920000	1700000	1510000
Q15181	Q15181	IPYR_HUMAN	PPA1	Inorganic pyrophosphatase	381381	377476	387246	659250	655901	611598
Q15185;Q15185-4	Q15185;Q15185-4	TEBP_HUMAN	PTGES3	Prostaglandin E synthase 3	388666	403378	475336	1540000	1630000	1460000
Q15208	Q15208	STK38_HUMAN	STK38	Serine/threonine-protein kinase 38	28544.5			36349.9		40394.5
Q15233;Q15233-2	Q15233;Q15233-2	NONO_HUMAN	NONO	Non-POU domain-containing octamer-binding protein	158283	177089	159949	146690	180914	158079
Q15257;Q15257-2;Q15257-3	Q15257;Q15257-2;Q15257-3;Q15257-4	PTPA_HUMAN	PTPA	Serine/threonine-protein phosphatase 2A activator	125825	126949	118037	86164.7	94268.8	85099.8
Q15286	Q15286	RAB35_HUMAN	RAB35	Ras-related protein Rab-35	190986	125860	162402	97246.3	75451.3	80261.4
Q15287;Q15287-2;Q15287-3	Q15287;Q15287-2;Q15287-3	RNPS1_HUMAN	RNPS1	RNA-binding protein with serine-rich domain 1	505709	503361	569547	353211	457744	494822
Q15291;Q15291-2	Q15291;Q15291-2	RBBP5_HUMAN	RBBP5	Retinoblastoma-binding protein 5	64470.8	78169.1	35880.3	35309.7	32253.7	26220.3
Q15334	Q15334	L2GL1_HUMAN	LLGL1	Lethal(2) giant larvae protein homolog 1	41014	34480.4	24164.2		19398.7
Q15363	Q15363	TMED2_HUMAN	TMED2	Transmembrane emp24 domain-containing protein 2	113425	53494.4	75284.5
Q15365	Q15365	PCBP1_HUMAN	PCBP1	Poly(rC)-binding protein 1	145104	135074	155421	592134	410743	423510
Q15366;Q15366-2;Q15366-3;Q15366-6	Q15366;Q15366-2;Q15366-3;Q15366-6	PCBP2_HUMAN	PCBP2	Poly(rC)-binding protein 2	168722	163470	170514	823226	573159	566793
Q15369;Q15369-2	Q15369;Q15369-2	ELOC_HUMAN	ELOC	Elongin-C	635844	557405	619152	595840	694734	587504
Q15370;Q15370-2	Q15370;Q15370-2	ELOB_HUMAN	ELOB	Elongin-B	42914.7	27781.6	28126.5	63647.4	67575.6	58202.6
Q15382	Q15382	RHEB_HUMAN	RHEB	GTP-binding protein Rheb	64670.2	72277.3	73407.6	42047.6	38239.8	24835.1
Q15386	Q15386	UBE3C_HUMAN	UBE3C	Ubiquitin-protein ligase E3C	82179.8	41894.4	30051.4	31762.7		45918.7
Q15393	Q15393	SF3B3_HUMAN	SF3B3	Splicing factor 3B subunit 3	331462	313836	319017	275936	286036	308173
Q15424;Q15424-2;Q15424-3;Q15424-4	Q15424;Q15424-2;Q15424-3;Q15424-4	SAFB1_HUMAN	SAFB	Scaffold attachment factor B1	43731.3	43204.2	49831.3	64992.8	80048.5	90095.9
Q15427	Q15427	SF3B4_HUMAN	SF3B4	Splicing factor 3B subunit 4				19148.4	25376.4	27390.5
Q15435	Q15435;Q15435-2	PP1R7_HUMAN	PPP1R7	Protein phosphatase 1 regulatory subunit 7	172017	160596	139975	163049	173255	110630
Q15436-2	Q15436;Q15436-2	SC23A_HUMAN	SEC23A	Isoform 2 of Protein transport protein Sec23A	194593	160480	154479	124915	127892	123176
Q15437	Q15437	SC23B_HUMAN	SEC23B	Protein transport protein Sec23B	236441	261897	273412	221447	248477	210023
Q15459;Q15459-2	Q15459;Q15459-2	SF3A1_HUMAN	SF3A1	Splicing factor 3A subunit 1	40121.6	32711.9	29791.8	52963.5	76943.3	49855.7
Q15628	Q15628	TRADD_HUMAN	TRADD	Tumor necrosis factor receptor type 1-associated DEATH domain protein				50247	35322.9	25173.9
Q15631	Q15631;Q15631-2	TSN_HUMAN	TSN	Translin	34321.1	39607.3	35732.4	140218	140491	128671
Q15645	Q15645	PCH2_HUMAN	TRIP13	Pachytene checkpoint protein 2 homolog	39079.7	35570.1	16743.2	82235.5	52850.2	47364.3
Q15654	Q15654	TRIP6_HUMAN	TRIP6	Thyroid receptor-interacting protein 6	85378.8	62810.6		144540	159914	158915
Q15691	Q15691	MARE1_HUMAN	MAPRE1	Microtubule-associated protein RP/EB family member 1			11419.2	81691	63401.3	63749.4
Q15717;Q15717-2	Q15717;Q15717-2	ELAV1_HUMAN	ELAVL1	ELAV-like protein 1	106875	104054	104381	176131	165626	182721
Q15738	Q15738	NSDHL_HUMAN	NSDHL	Sterol-4-alpha-carboxylate 3-dehydrogenase, decarboxylating	86907.6	93136.3	96626.8	83660.1	101252	85345.1
Q15742;Q15742-2;Q15742-3	Q15742;Q15742-2;Q15742-3	NAB2_HUMAN	NAB2	NGFI-A-binding protein 2		59269.6	41482.3	39005.2	42018.9	38180.9
Q15758	Q15758	AAAT_HUMAN	SLC1A5	Neutral amino acid transporter B(0)	25464.7	25893.8	34224.1	8188.72	8793.83
Q15813;Q15813-2	Q15813;Q15813-2	TBCE_HUMAN	TBCE	Tubulin-specific chaperone E	23160.8	22987.3	25051.2	62062	44646.3	43990.9
Q15814	Q15814	TBCC_HUMAN	TBCC	Tubulin-specific chaperone C	116948	128648	137743	103238	77521.8	75847.5
Q15833;Q15833-2;Q15833-3	Q15833;Q15833-2;Q15833-3	STXB2_HUMAN	STXBP2	Syntaxin-binding protein 2	20017.8	10918.7	15411	32075.9	26291.1	37002.8
Q15843	Q15843	NEDD8_HUMAN	NEDD8	NEDD8		44184.4	39993.1	25176.1		24708.3
Q15942;Q15942-2	Q15942;Q15942-2	ZYX_HUMAN	ZYX	Zyxin	117041			452890	342453	304680
Q16181;Q16181-2	Q16181;Q6ZU15;Q16181-2	SEPT7_HUMAN	SEPTIN7	Septin-7	167648	151093	183109	168217	143108	118384
Q16186	Q16186	ADRM1_HUMAN	ADRM1	Proteasomal ubiquitin receptor ADRM1	146461	168308	147567	54735.1	64692	71464.6
Q16204	Q16204	CCDC6_HUMAN	CCDC6	Coiled-coil domain-containing protein 6		13280.7		59501.4	44152.3	34442.3
Q16401;Q16401-2	Q16401;Q16401-2	PSMD5_HUMAN	PSMD5	26S proteasome non-ATPase regulatory subunit 5	74013.9	183066	93601.9	563640	534772	473930
Q16531	Q16531	DDB1_HUMAN	DDB1	DNA damage-binding protein 1	179449	170174	156310	104812	145268	107955
Q16537;Q16537-2;Q16537-3	Q16537;Q16537-2;Q16537-3	2A5E_HUMAN	PPP2R5E	Serine/threonine-protein phosphatase 2A 56 kDa regulatory subunit epsilon isoform				23667.4	27990.5	23944.8
Q16539;Q16539-2;Q16539-3;Q16539-4;Q16539-5	Q16539;Q16539-2;Q16539-3;Q16539-4;Q16539-5	MK14_HUMAN	MAPK14	Mitogen-activated protein kinase 14					30384.6
Q16543	Q16543	CDC37_HUMAN	CDC37	Hsp90 co-chaperone Cdc37				214355	160161	191200
Q16555;Q16555-2	Q16555;Q16555-2	DPYL2_HUMAN	DPYSL2	Dihydropyrimidinase-related protein 2	180687	220020	271461	420718	474073	487103
Q16563;Q16563-2	Q16563;Q16563-2	SYPL1_HUMAN	SYPL1	Synaptophysin-like protein 1	64824.6	51394.2	45939.2	73851.3	47475.7	44934.4
Q16576;Q16576-2	Q16576;Q16576-2	RBBP7_HUMAN	RBBP7	Histone-binding protein RBBP7	639465	586156	654112	378279	387406	377723
Q16629;Q16629-2;Q16629-3;Q16629-4	Q16629;Q16629-2;Q16629-3;Q16629-4	SRSF7_HUMAN	SRSF7	Serine/arginine-rich splicing factor 7	318664	358363	400857	920382	1000000	1080000
Q16643;Q16643-3	Q16643;Q16643-2;Q16643-3	DREB_HUMAN	DBN1	Drebrin				80676.6	65151.9	72119.8
Q16658	Q16658	FSCN1_HUMAN	FSCN1	Fascin	356847	317840	278314	138553	176908	156926
Q16698;Q16698-2	Q16698;Q16698-2	DECR_HUMAN	DECR1	2,4-dienoyl-CoA reductase [(3E)-enoyl-CoA-producing], mitochondrial	79180.1	70400.1	62838	108863	105923	96944.5
Q16719	Q16719;Q16719-2	KYNU_HUMAN	KYNU	Kynureninase	219262	206138	216147	73194.5	85249.9	68022.7
Q16762	Q16762	THTR_HUMAN	TST	Thiosulfate sulfurtransferase	66950.5	58095.1	72820.1	144862	155085	176773
Q16775;Q16775-2	Q16775;Q16775-2	GLO2_HUMAN	HAGH	Hydroxyacylglutathione hydrolase, mitochondrial	363908	378476	448861	188726	201345	208543
Q16822	Q16822;Q16822-2	PCKGM_HUMAN	PCK2	Phosphoenolpyruvate carboxykinase [GTP], mitochondrial	364670	365631	375511	250581	301710	303130
Q16836;Q16836-2;Q16836-3	Q16836;Q16836-2;Q16836-3	HCDH_HUMAN	HADH	Hydroxyacyl-coenzyme A dehydrogenase, mitochondrial	147033	95113.6	154106	55635.4	58487.8	46223
Q16851;Q16851-2	Q16851;Q16851-2	UGPA_HUMAN	UGP2	UTP--glucose-1-phosphate uridylyltransferase	273556	256404	257579	282536	291157	210960
Q16881;Q16881-2;Q16881-3;Q16881-4;Q16881-5;Q16881-6;Q16881-7	Q16881;Q16881-4;Q16881-5;Q16881-2;Q16881-3;Q16881-6;Q16881-7	TRXR1_HUMAN	TXNRD1	Thioredoxin reductase 1, cytoplasmic	134833	99645.2	105963	57940.1	71383.4	33512.3
Q16890;Q16890-2;Q16890-3;Q16890-4;Q16890-5	Q16890;Q16890-2;Q16890-3;Q16890-4;Q16890-5	TPD53_HUMAN	TPD52L1	Tumor protein D53	41208.1	13012.2	45127.1	78779.9	80942.8	74198
Q1KMD3	Q1KMD3	HNRL2_HUMAN	HNRNPUL2	Heterogeneous nuclear ribonucleoprotein U-like protein 2	920728	860978	859408	602562	872118	1040000
Q27J81;Q27J81-2	Q27J81;Q27J81-2	INF2_HUMAN	INF2	Inverted formin-2		13726.4		94696.5	60416.9	70929
Q2M389	Q2M389	WASC4_HUMAN	WASHC4	WASH complex subunit 4					19149.6
Q2TAY7	Q2TAY7	SMU1_HUMAN	SMU1	WD40 repeat-containing protein SMU1	201265	189521	194574	63728.5	116289	66985.5
Q32P41	Q32P41	TRM5_HUMAN	TRMT5	tRNA (guanine(37)-N1)-methyltransferase	24725.7	17231.8	26113	18626.9	12434.2
Q3L8U1;Q3L8U1-2;Q3L8U1-3;Q8TD26;Q8TD26-3;Q9HCK8;Q9HCK8-2;Q9P2D1	Q3L8U1;Q8TD26;Q9HCK8;Q9P2D1;Q3L8U1-3;Q3L8U1-2;Q8TD26-3;Q9HCK8-2	CHD6_HUMAN;CHD7_HUMAN;CHD8_HUMAN;CHD9_HUMAN	CHD6;CHD7;CHD8;CHD9	Chromodomain-helicase-DNA-binding protein 9	20391.3	29066.3	43725.1	18725.2	45915	46891
Q3LXA3;Q3LXA3-2	Q3LXA3;Q3LXA3-2	TKFC_HUMAN	TKFC	Triokinase/FMN cyclase	35235.2	27615.8	12170.4	20528.1	21661.9	15677.3
Q3MHD2;Q3MHD2-2	Q3MHD2;Q3MHD2-2	LSM12_HUMAN	LSM12	Protein LSM12		134048	154934	129848	86339.4
Q3YEC7;Q3YEC7-3	Q3YEC7;Q3YEC7-3;Q3YEC7-2;Q3YEC7-4;Q3YEC7-5;Q3YEC7-6	RABL6_HUMAN	RABL6	Rab-like protein 6	25033.5	37361.3	34914.1	14600.4
Q49AR2;Q49AR2-2	Q49AR2;Q49AR2-2	CE022_HUMAN	C5orf22	UPF0489 protein C5orf22	122529	108525	97770.9	80603.1	87789.2	52727.3
Q4G0F5	Q4G0F5	VP26B_HUMAN	VPS26B	Vacuolar protein sorting-associated protein 26B	25179.8	29497.5	10647.7
Q4G0J3;Q4G0J3-2;Q4G0J3-3	Q4G0J3;Q4G0J3-2;Q4G0J3-3	LARP7_HUMAN	LARP7	La-related protein 7		16605.2
Q4G0P3;Q4G0P3-10;Q4G0P3-5;Q4G0P3-6;Q4G0P3-8	Q4G0P3;Q4G0P3-10;Q4G0P3-5;Q4G0P3-6;Q4G0P3-8	HYDIN_HUMAN	HYDIN	Hydrocephalus-inducing protein homolog	125750	137712	118920	12243.9
Q4ZG55	Q4ZG55;Q4ZG55-4	GREB1_HUMAN	GREB1	Protein GREB1	91041.5	74766.7	77881.5	64369.3	39943.5	46562.8
Q52LJ0;Q52LJ0-1	Q52LJ0;Q52LJ0-1	FA98B_HUMAN	FAM98B	Protein FAM98B	28791	29931.6	38005	84576.5	76591.3	74828.1
Q53FT3	Q53FT3	HIKES_HUMAN	HIKESHI	Protein Hikeshi	43765	54732.1	68347.4	20630.8	31571.2	32262.1
Q53H96;Q53H96-2	Q53H96;Q53H96-2	P5CR3_HUMAN	PYCR3	Pyrroline-5-carboxylate reductase 3	128616	128129	107620	58213.1	53688.7	46163
Q53HC9	Q53HC9	EIPR1_HUMAN	EIPR1	EARP and GARP complex-interacting protein 1	107350	78980.8	73090.8	111669	133084	101190
Q562R1	Q562R1	ACTBL_HUMAN	ACTBL2	Beta-actin-like protein 2	2400000	1450000	2190000	1200000	1520000	1400000
Q58FF6	Q58FF6	H90B4_HUMAN	HSP90AB4P	Putative heat shock protein HSP 90-beta 4	36388.5	32931.5	45292.3	60498.6	35927.4	48830.1
Q5BKZ1	Q5BKZ1	ZN326_HUMAN	ZNF326	DBIRD complex subunit ZNF326	60425.4	65284.9	66292.1	45977.8	48223	55888.1
Q5D862	Q5D862	FILA2_HUMAN	FLG2	Filaggrin-2	359962	450342	474507	435711	422913	224034
Q5GLZ8;Q5GLZ8-2;Q5GLZ8-3;Q5GLZ8-6	Q5GLZ8;Q5GLZ8-2;Q5GLZ8-3;Q5GLZ8-6	HERC4_HUMAN	HERC4	Probable E3 ubiquitin-protein ligase HERC4	15308.2	10926.4		19570.3	14035.3
Q5H9R7;Q5H9R7-2;Q5H9R7-3;Q5H9R7-4;Q5H9R7-5;Q5H9R7-6	Q5H9R7;Q5H9R7-2;Q5H9R7-3;Q5H9R7-4;Q5H9R7-5;Q5H9R7-6	PP6R3_HUMAN	PPP6R3	Serine/threonine-protein phosphatase 6 regulatory subunit 3	213939	226809	210977	236856	232531	244405
Q5HYI8	Q5HYI8	RABL3_HUMAN	RABL3	Rab-like protein 3	38896.2	35068.4	50415.1	37186.1	26854	28349.4
Q5JRX3;Q5JRX3-2	Q5JRX3;Q5JRX3-2;Q5JRX3-3	PREP_HUMAN	PITRM1	Presequence protease, mitochondrial	124243	133617	126730	139292	155194	144561
Q5JSH3;Q5JSH3-2;Q5JSH3-4	Q5JSH3;Q5JSH3-2;Q5JSH3-4	WDR44_HUMAN	WDR44	WD repeat-containing protein 44	57846	46752.4	38305.3	26316.2	26723.4	13371.4
Q5JTY5;Q5JTY5-2;Q5RIA9;Q8IUF1;Q9BRT8;Q9BRT8-2	Q5JTY5;Q9BRT8;Q5RIA9;Q4V339;Q8IUF1;Q5JTY5-2;Q9BRT8-2	ZNG1A_HUMAN;ZNG1B_HUMAN;ZNG1C_HUMAN;ZNG1E_HUMAN	ZNG1A;ZNG1B;ZNG1C;ZNG1E	Zinc-regulated GTPase metalloprotein activator 1C	30197.9	24917.5	26881.9	29148.6	34489.3	36562.3
Q5MNZ6	Q5MNZ6	WIPI3_HUMAN	WDR45B	WD repeat domain phosphoinositide-interacting protein 3	47173.9	91739.7	72008.7	41310.1	38322.2	15990.2
Q5SRH9;Q5SRH9-4;Q5SRH9-5;Q5SRH9-6	Q5SRH9;Q5SRH9-2;Q5SRH9-4;Q5SRH9-5;Q5SRH9-6	TT39A_HUMAN	TTC39A	Tetratricopeptide repeat protein 39A	45398.5	35232.6	50870.7	44811.5	36199.7
Q5SWX8;Q5SWX8-2;Q5SWX8-4	Q5SWX8;Q5SWX8-2;Q5SWX8-4	ODR4_HUMAN	ODR4	Protein odr-4 homolog	18945.7	14600.3	16985.4
Q5T1M5	Q5T1M5	FKB15_HUMAN	FKBP15	FK506-binding protein 15	71767	46288.6	63773.9	77276.4	51576.8	56783.6
Q5T2D3	Q5T2D3	OTUD3_HUMAN	OTUD3	OTU domain-containing protein 3	25512.6	26631.5	29662.3
Q5T4S7;Q5T4S7-2;Q5T4S7-3;Q5T4S7-4	Q5T4S7;Q5T4S7-2;Q5T4S7-3;Q5T4S7-4;Q5T4S7-5	UBR4_HUMAN	UBR4	E3 ubiquitin-protein ligase UBR4	37669.2	40710.5	42444.6	49818.6	68932.1	56635.3
Q5T653	Q5T653	RM02_HUMAN	MRPL2	Large ribosomal subunit protein uL2m	49663.9	61516	32227.3	35569.2	35737.8	19620.6
Q5T6V5	Q5T6V5	QNG1_HUMAN	QNG1	Queuosine 5'-phosphate N-glycosylase/hydrolase	141712	153464	145035	59999.8	66673.2	69280.7
Q5T749	Q5T749	KPRP_HUMAN	KPRP	Keratinocyte proline-rich protein	31784.8	82090.6	25902	56815.2	25130.2
Q5T8I3;Q5T8I3-2	Q5T8I3;Q5T8I3-2	EEIG2_HUMAN	EEIG2	EEIG family member 2	57265.1	82229.9	83509.8	59301.3	48768.1	40299.5
Q5TAX3;Q5TAX3-2	Q5TAX3;Q5TAX3-2	TUT4_HUMAN	TUT4	Terminal uridylyltransferase 4	64042.5
Q5TC12;Q5TC12-2;Q5TC12-3	Q5TC12;Q5TC12-2;Q5TC12-3	ATPF1_HUMAN	ATPAF1	ATP synthase mitochondrial F1 complex assembly factor 1	16570.3	13065.3	17767.5	55094.9	43844	29209.4
Q5TDH0;Q5TDH0-3	Q5TDH0;Q5TDH0-3	DDI2_HUMAN	DDI2	Protein DDI1 homolog 2	67285.4	59313.7	73135.5	68027.7	56765.4	45012.4
Q5TEC6	Q5TEC6	H37_HUMAN	H3-7	Histone H3-7	30374.5	30096	45950.9	58178.6	60309.9	63206.6
Q5TFE4	Q5TFE4;Q5TFE4-2	NT5D1_HUMAN	NT5DC1	5'-nucleotidase domain-containing protein 1	186986	152249	183651	123267	150804	118528
Q5VTR2	Q5VTR2	BRE1A_HUMAN	RNF20	E3 ubiquitin-protein ligase BRE1A				85027.4	66410.6	86877.8
Q5VV17	Q5VV17	OTUD1_HUMAN	OTUD1	OTU domain-containing protein 1	11600000	11700000	13100000	4090000	5450000	5250000
Q5VWZ2	Q5VWZ2;Q5VWZ2-2	LYPL1_HUMAN	LYPLAL1	Lysophospholipase-like protein 1	70402.3	74359.9	91614.8	34753.2	31615.8	32432.1
Q5VYK3	Q5VYK3	ECM29_HUMAN	ECPAS	Proteasome adapter and scaffold protein ECM29	25412.2	45228.2	11639.8	94867.6	70995.3	70486.9
Q5W111;Q5W111-2	Q5W111;Q5W111-2	SPRY7_HUMAN	SPRYD7	SPRY domain-containing protein 7	37287.4	27870.6	36954.2	16170.4
Q658Y4	Q658Y4	F91A1_HUMAN	FAM91A1	Protein FAM91A1	47407.1	45332.6	48910	76271.5	67565.7	52528.4
Q66K14;Q66K14-2	Q66K14;Q66K14-2	TBC9B_HUMAN	TBC1D9B	TBC1 domain family member 9B	14123.1	16980.6
Q66PJ3;Q66PJ3-1;Q66PJ3-10;Q66PJ3-2;Q66PJ3-3;Q66PJ3-4;Q66PJ3-7;Q66PJ3-9	Q66PJ3;Q66PJ3-4;Q66PJ3-1;Q66PJ3-10;Q66PJ3-2;Q66PJ3-3;Q66PJ3-7;Q66PJ3-9	AR6P4_HUMAN	ARL6IP4	ADP-ribosylation factor-like protein 6-interacting protein 4	32340.5	39973.2	37958.3		34189.4	26650.3
Q676U5;Q676U5-2;Q676U5-3;Q676U5-4;Q676U5-5	Q676U5;Q676U5-2;Q676U5-3;Q676U5-4;Q676U5-5	A16L1_HUMAN	ATG16L1	Autophagy-related protein 16-1	29493.1	47216.7	53405.6	36247.4
Q68CP9;Q68CP9-3	Q68CP9;Q68CP9-3	ARID2_HUMAN	ARID2	AT-rich interactive domain-containing protein 2	30119.3	22532.1	18028.1	23776.4	24633.4	11487.4
Q68DQ2;Q68DQ2-1;Q68DQ2-2	Q68DQ2;Q68DQ2-1;Q68DQ2-2	CRBG3_HUMAN	CRYBG3	Very large A-kinase anchor protein	104813
Q68EM7;Q68EM7-2;Q68EM7-5;Q68EM7-6	Q68EM7;Q68EM7-2;Q68EM7-5;Q68EM7-6	RHG17_HUMAN	ARHGAP17	Rho GTPase-activating protein 17				30393.7	19306.5	34637.6
Q69YN2	Q69YN2;Q69YN2-3	C19L1_HUMAN	CWF19L1	CWF19-like protein 1	33084.3	32377.9	37355.6	26849.9	26519.8	32058.1
Q6AI08	Q6AI08	HEAT6_HUMAN	HEATR6	HEAT repeat-containing protein 6	57666.1	41832.4	25646.2	121671	69054.4	70133.8
Q6DD88	Q6DD88	ATLA3_HUMAN	ATL3	Atlastin-3	134822	148222	146921	386515	328087	312338
Q6FI81;Q6FI81-3	Q6FI81;Q6FI81-3	CPIN1_HUMAN	CIAPIN1	Anamorsin	10073.3	17016.7	15968.3	60194	59144.6	48996.1
Q6GQQ9	Q6GQQ9;Q6GQQ9-2	OTU7B_HUMAN	OTUD7B	OTU domain-containing protein 7B	1320000	1330000	1620000	301773	435171	418615
Q6I9Y2	Q6I9Y2	THOC7_HUMAN	THOC7	THO complex subunit 7 homolog				49455.3	35042.3	51165.1
Q6IA69	Q6IA69;Q6IA69-2	NADE_HUMAN	NADSYN1	Glutamine-dependent NAD(+) synthetase	122137	119899	103099	75017.3	68380.8	80512.8
Q6IA86;Q6IA86-2;Q6IA86-3;Q6IA86-4;Q6IA86-5;Q6IA86-6	Q6IA86;Q6IA86-2;Q6IA86-3;Q6IA86-4;Q6IA86-5;Q6IA86-6	ELP2_HUMAN	ELP2	Elongator complex protein 2	57732	63482.2	58704	36039.8	36178.2	33095.5
Q6IBS0	Q6IBS0	TWF2_HUMAN	TWF2	Twinfilin-2	17910.2	18801.5	18457.3		18904.3	4650.07
Q6IN85;Q6IN85-2;Q6IN85-5	Q6IN85;Q6IN85-2;Q6IN85-4;Q6IN85-5	P4R3A_HUMAN	PPP4R3A	Serine/threonine-protein phosphatase 4 regulatory subunit 3A	18557.8	15909.2	18698.2	46448.6	30291.9	51744.3
Q6L8Q7;Q6L8Q7-2	Q6L8Q7;Q6L8Q7-2	PDE12_HUMAN	PDE12	2',5'-phosphodiesterase 12	46599.4	36555.9	39625.2	15032.7	16287.7	13947.7
Q6NUK1	Q6NUK1	SCMC1_HUMAN	SLC25A24	Mitochondrial adenyl nucleotide antiporter SLC25A24	35983		24861.9	130466	63857.1	91902.3
Q6NXG1;Q6NXG1-2;Q6NXG1-3;Q6NXG1-4;Q6NXG1-5;Q9H6T0;Q9H6T0-2	Q6NXG1;Q9H6T0;Q6NXG1-3;Q6NXG1-2;Q6NXG1-4;Q6NXG1-5;Q9H6T0-2	ESRP1_HUMAN;ESRP2_HUMAN	ESRP1;ESRP2	Epithelial splicing regulatory protein 1	20580.8	23885.8	17909.9	69967.9	39042.3	50704.5
Q6NZY4	Q6NZY4	ZCHC8_HUMAN	ZCCHC8	Zinc finger CCHC domain-containing protein 8				21177.1	11402.6	10141
Q6P1M3	Q6P1M3;Q6P1M3-2	L2GL2_HUMAN	LLGL2	LLGL scribble cell polarity complex component 2	226485	207439	195065	125281	120729	124765
Q6P1N0;Q6P1N0-2	Q6P1N0;Q6P1N0-2	C2D1A_HUMAN	CC2D1A	Coiled-coil and C2 domain-containing protein 1A	18199.5	17219.7	19931.6	29386.4	23592.2	11860.8
Q6P1N9	Q6P1N9	TATD1_HUMAN	TATDN1	Deoxyribonuclease TATDN1	130359	136692	137841	44306.8	53713.4	18116.7
Q6P1Q9	Q6P1Q9;Q96IZ6;Q6P1Q9-2	MET2B_HUMAN	METTL2B	tRNA N(3)-methylcytidine methyltransferase METTL2B	50288.4	39718.9	44491.5	25161.3	11896.1	19303.7
Q6P1X6	Q6P1X6;Q6P1X6-2	CH082_HUMAN	C8orf82	UPF0598 protein C8orf82	38796.2	22348.8	25004.8
Q6P2E9	Q6P2E9	EDC4_HUMAN	EDC4	Enhancer of mRNA-decapping protein 4	202039	175141	156287	119537	124025	100061
Q6P2Q9	Q6P2Q9	PRP8_HUMAN	PRPF8	Pre-mRNA-processing-splicing factor 8	164381	136844	126592	121737	127577	122355
Q6P4I2	Q6P4I2	WDR73_HUMAN	WDR73	WD repeat-containing protein 73	35212.2	31067.1	40338.4	33655.4	32794.5
Q6P587;Q6P587-2;Q6P587-3	Q6P587;Q6P587-2;Q6P587-3	FAHD1_HUMAN	FAHD1	Acylpyruvase FAHD1, mitochondrial	66209.2	50957.4	52977.5	40425.2	37663.9	39892.9
Q6P996;Q6P996-3;Q6P996-4;Q6P996-5	Q6P996;Q6P996-3;Q6P996-4;Q6P996-5	PDXD1_HUMAN	PDXDC1	Pyridoxal-dependent decarboxylase domain-containing protein 1	31284	31667.2	31321.2	217643	121382	125940
Q6P9B6	Q6P9B6	MEAK7_HUMAN	MEAK7	MTOR-associated protein MEAK7	20070.8	23940.5	12041.5	6030.99	10493.3
Q6PD74;Q6PD74-2	Q6PD74;Q6PD74-2	AAGAB_HUMAN	AAGAB	Alpha- and gamma-adaptin-binding protein p34				112696	73602.8	85096.5
Q6PEY2	P0DPH7;P0DPH8;Q6PEY2;P0DPH7-2	TBA3E_HUMAN	TUBA3E	Tubulin alpha-3E chain	20382.3	33641.4	25164.7	21355.6	15369.4	36926.6
Q6PI48	Q6PI48	SYDM_HUMAN	DARS2	Aspartate--tRNA ligase, mitochondrial	246109	248446	220541	185367	165690	142454
Q6PKG0;Q6PKG0-3	Q6PKG0;Q6PKG0-3	LARP1_HUMAN	LARP1	La-related protein 1	21573.6	23484.1	26196.2	46042.9	42647.4	57092.8
Q6RW13	Q6RW13	ATRAP_HUMAN	AGTRAP	Type-1 angiotensin II receptor-associated protein	62649.1	66577.6	59609.1	48332.7	53688.5	41847.7
Q6UW68	Q6UW68	TM205_HUMAN	TMEM205	Transmembrane protein 205	112870	82826.3	96549	42747.7	27984.7	35742.5
Q6UWE0;Q6UWE0-2	Q6UWE0;Q6UWE0-2;Q6UWE0-3	LRSM1_HUMAN	LRSAM1	E3 ubiquitin-protein ligase LRSAM1	159609	158072	190812	157627	130213	150098
Q6UXG2;Q6UXG2-2;Q6UXG2-3;Q6UXG2-4	Q6UXG2;Q6UXG2-3;Q6UXG2-2;Q6UXG2-4	ELAP1_HUMAN	ELAPOR1	Endosome/lysosome-associated apoptosis and autophagy regulator 1	57022.2	54325.8	52081.6	15259.6	17507.1
Q6UXN9	Q6UXN9	WDR82_HUMAN	WDR82	WD repeat-containing protein 82	150830	160970	184599	116378	179880	128162
Q6VY07;Q6VY07-2	Q6VY07;Q6VY07-2	PACS1_HUMAN	PACS1	Phosphofurin acidic cluster sorting protein 1	36003.2	33264.5	17028.6	51490.5		40067.3
Q6WKZ4;Q6WKZ4-2;Q6WKZ4-3	Q6WKZ4;Q6WKZ4-2;Q6WKZ4-3	RFIP1_HUMAN	RAB11FIP1	Rab11 family-interacting protein 1	131018	180906	317199	350318	357368	348433
Q6YN16;Q6YN16-2	Q6YN16;Q6YN16-2	HSDL2_HUMAN	HSDL2	Hydroxysteroid dehydrogenase-like protein 2	110728	79362.8	85234.8	122509	115623	114443
Q6ZMW3;Q6ZMW3-2	Q6ZMW3;Q6ZMW3-2	EMAL6_HUMAN	EML6	Echinoderm microtubule-associated protein-like 6	865744	854782			851368	764510
Q6ZT07	Q6ZT07	TBCD9_HUMAN	TBC1D9	TBC1 domain family member 9	18608
Q6ZT62;Q6ZT62-2;Q96GD0	Q6ZT62;Q96GD0;Q6ZT62-2	BGIN_HUMAN;PLPP_HUMAN	BARGIN;PDXP	Bargin		12992.9			13812.8
Q6ZTN6;Q6ZTN6-1;Q6ZTN6-2;Q8IZ07	Q6ZTN6;Q8IZ07;Q6ZTN6-2;Q6ZTN6-1	AN13A_HUMAN;AN13D_HUMAN	ANKRD13A;ANKRD13D	Ankyrin repeat domain-containing protein 13D	84407.8	100114	111941	80867.1	72995.7	55402.5
Q70CQ2	Q70CQ2;Q70CQ2-2;Q70CQ2-3	UBP34_HUMAN	USP34	Ubiquitin carboxyl-terminal hydrolase 34	313218	315401	334169		73042.4	158532
Q70CQ3	Q70CQ3	UBP30_HUMAN	USP30	Ubiquitin carboxyl-terminal hydrolase 30	158630	172830	175338
Q70E73;Q70E73-2;Q70E73-3;Q70E73-4;Q70E73-5;Q70E73-6;Q70E73-7;Q70E73-8;Q70E73-9	Q70E73;Q70E73-2;Q70E73-3;Q70E73-4;Q70E73-5;Q70E73-6;Q70E73-7;Q70E73-8;Q70E73-9	RAPH1_HUMAN	RAPH1	Ras-associated and pleckstrin homology domains-containing protein 1	24307.1	32237.6	9037.21	37996.1	32016.5	16741.8
Q71U36;Q71U36-2	P0DPH7;P0DPH8;P68363;Q6PEY2;Q71U36;Q9BQE3;P0DPH7-2;P68363-2;Q71U36-2	TBA1A_HUMAN	TUBA1A	Tubulin alpha-1A chain	4480000	4530000	4370000	6180000	4660000	4530000
Q71UM5	Q71UM5	RS27L_HUMAN	RPS27L	Ribosomal protein eS27-like	565107	540340	533505	196940	318652
Q7KZ85	Q7KZ85;Q7KZ85-3	SPT6H_HUMAN	SUPT6H	Transcription elongation factor SPT6	440966	542672	628140	942112	630311	631692
Q7KZF4	Q7KZF4	SND1_HUMAN	SND1	Staphylococcal nuclease domain-containing protein 1	185276	182547	208876	259840	237980	270355
Q7L0Y3	Q7L0Y3	TM10C_HUMAN	TRMT10C	tRNA methyltransferase 10 homolog C	87977.5	60489.8	80125.8	133398	121105	107731
Q7L1Q6;Q7L1Q6-2;Q7L1Q6-3;Q7L1Q6-4	Q7L1Q6;Q7L1Q6-2;Q7L1Q6-3;Q7L1Q6-4	5MP2_HUMAN	BZW1	eIF5-mimic protein 2			31221.8	103503	80896	77505.8
Q7L2H7	Q7L2H7;Q7L2H7-2	EIF3M_HUMAN	EIF3M	Eukaryotic translation initiation factor 3 subunit M	61767.7	57025.1	66968.2	89364	71536.2	124327
Q7L2J0;Q7L2J0-2	Q7L2J0;Q7L2J0-2	MEPCE_HUMAN	MEPCE	7SK snRNA methylphosphate capping enzyme	96734.4	92340.6	79919	45673.4	49046.1	43380.1
Q7L576-2;Q7L576-3	Q7L576;Q7L576-2;Q7L576-3	CYFP1_HUMAN	CYFIP1	Isoform 2 of Cytoplasmic FMR1-interacting protein 1	13023.1	12606.5	8993.4	33223.9	20563.3	19971.6
Q7L5D6	Q7L5D6;Q7L5D6-2	GET4_HUMAN	GET4	Golgi to ER traffic protein 4 homolog	123572	97542.3	94846.5	89357.9	56443.7	57483.1
Q7L5N1	Q7L5N1	CSN6_HUMAN	COPS6	COP9 signalosome complex subunit 6	47163.6	48506.2	54446.9	107169	104250	77758.5
Q7L775	Q7L775	EPMIP_HUMAN	EPM2AIP1	EPM2A-interacting protein 1	45791.6	46095.9	49197.2	48719.9	43229	50183.4
Q7L7X3	Q7L7X3	TAOK1_HUMAN	TAOK1	Serine/threonine-protein kinase TAO1	28505.7	27407.4	31002.1	20516.8	21160.4	12433
Q7L9L4;Q7L9L4-2;Q9H8S9	Q7L9L4;Q9H8S9;Q7L9L4-2;Q9H8S9-2	MOB1A_HUMAN;MOB1B_HUMAN	MOB1A;MOB1B	MOB kinase activator 1B	20433.8	27249.7		177098	136100	112847
Q7LBC6	Q7LBC6	KDM3B_HUMAN	KDM3B	Lysine-specific demethylase 3B	16014.1	8001.6		43231.4	29250.4	25968.4
Q7RTP6	Q7RTP6	MICA3_HUMAN	MICAL3	[F-actin]-monooxygenase MICAL3	101133	158555	287767	218120	231361	202965
Q7RTV0	Q7RTV0	PHF5A_HUMAN	PHF5A	PHD finger-like domain-containing protein 5A		9093.69		71618.9	72746.4	75631.1
Q7Z2W4;Q7Z2W4-2;Q7Z2W4-3	Q7Z2W4;Q7Z2W4-2;Q7Z2W4-3	ZCCHV_HUMAN	ZC3HAV1	Zinc finger CCCH-type antiviral protein 1	88355.6	69028.6	87510.6	48850.4	64972.4	73193.7
Q7Z2Z2;Q7Z2Z2-2	Q7Z2Z2;Q7Z2Z2-2	EFL1_HUMAN	EFL1	Elongation factor-like GTPase 1	58352.9	54026.7	47772.6	99580.2	63445.1	62511
Q7Z3U7;Q7Z3U7-2;Q7Z3U7-3;Q7Z3U7-5;Q7Z3U7-6	Q7Z3U7;Q7Z3U7-2;Q7Z3U7-3;Q7Z3U7-5;Q7Z3U7-6	MON2_HUMAN	MON2	Protein MON2 homolog				35715.9
Q7Z406;Q7Z406-6	Q7Z406;Q7Z406-2;Q7Z406-4;Q7Z406-5;Q7Z406-6	MYH14_HUMAN	MYH14	Myosin-14	114848	115364	133475	312011	223651	235043
Q7Z434;Q7Z434-2;Q7Z434-5	Q7Z434;Q7Z434-5;Q7Z434-2	MAVS_HUMAN	MAVS	Mitochondrial antiviral-signaling protein				21220.4	13023
Q7Z4H3;Q7Z4H3-2	Q7Z4H3;Q7Z4H3-2	HDDC2_HUMAN	HDDC2	5'-deoxynucleotidase HDDC2	41328.8	30374.5		154335	128332	129336
Q7Z4S6;Q7Z4S6-2;Q7Z4S6-3;Q7Z4S6-4;Q7Z4S6-5;Q7Z4S6-6	O75037;Q2M1P5;Q7Z4S6;Q86VH2;O75037-2;O75037-3;O75037-4;Q7Z4S6-2;Q7Z4S6-3;Q7Z4S6-4;Q7Z4S6-5;Q7Z4S6-6;Q86VH2-2;Q86VH2-3	KI21A_HUMAN	KIF21A	Kinesin-like protein KIF21A	34088.5	37969.5	28063.9	39166.4	36862.7	34206.7
Q7Z4W1	Q7Z4W1	DCXR_HUMAN	DCXR	L-xylulose reductase	84849.6	114045	75882.3	53438.1	43195.1	109797
Q7Z5L9;Q7Z5L9-2	Q7Z5L9;Q7Z5L9-2	I2BP2_HUMAN	IRF2BP2	Interferon regulatory factor 2-binding protein 2				47192.2	50245.8	51279.9
Q7Z6Z7;Q7Z6Z7-2;Q7Z6Z7-3	Q7Z6Z7;Q7Z6Z7-2;Q7Z6Z7-3	HUWE1_HUMAN	HUWE1	E3 ubiquitin-protein ligase HUWE1	4360000	2490000	1790000	212706	185092	163640
Q7Z739;Q9BYJ9	Q7Z739;Q9BYJ9	YTHD1_HUMAN;YTHD3_HUMAN	YTHDF1;YTHDF3	YTH domain-containing family protein 3	44355	67126.4	52279.8	58185.1	49895.5	63956.7
Q7Z7H5;Q7Z7H5-2;Q7Z7H5-3	Q7Z7H5;Q7Z7H5-2;Q7Z7H5-3	TMED4_HUMAN	TMED4	Transmembrane emp24 domain-containing protein 4	44886.7	60559.9	35017.4
Q86SF2	Q86SF2	GALT7_HUMAN	GALNT7	N-acetylgalactosaminyltransferase 7	55063.9	49780.9	56647.5		38626.6	58313.3
Q86TI2;Q86TI2-2;Q86TI2-4	Q86TI2;Q86TI2-2;Q86TI2-4	DPP9_HUMAN	DPP9	Dipeptidyl peptidase 9	45844.3	56190.7	35165.6	32766.3	40502.7	21451.7
Q86TP1	Q86TP1;Q86TP1-2;Q86TP1-3;Q86TP1-4;Q86TP1-5;Q86TP1-6;Q86TP1-7	PRUN1_HUMAN	PRUNE1	Exopolyphosphatase PRUNE1	116394	98755	93747.1	166672	164233	131011
Q86TU7	Q86TU7	SETD3_HUMAN	SETD3	Actin-histidine N-methyltransferase	74203.8	70950.6	69772.9	95382.7	79301.1	64183.5
Q86U42;Q86U42-2;Q92843-2	Q86U42;Q86U42-2;Q92843-2	B2CL2_HUMAN;PABP2_HUMAN	BCL2L2;PABPN1	Polyadenylate-binding protein 2	42515.1	53544.1	37425.4	221563	217794	232877
Q86UE8;Q86UE8-2;Q86UE8-3	Q86UE8;Q9UKI8;Q86UE8-2;Q86UE8-3;Q9UKI8-2;Q9UKI8-3;Q9UKI8-4;Q9UKI8-5	TLK2_HUMAN	TLK2	Serine/threonine-protein kinase tousled-like 2	15375.2	9377.81	11227.5	34690.4	17110.8	32236
Q86UV5	Q86UV5;Q86UV5-2;Q86UV5-3;Q86UV5-5;Q86UV5-8	UBP48_HUMAN	USP48	Ubiquitin carboxyl-terminal hydrolase 48	230610	154594	118448	12168.6	116428
Q86UV5-5	Q86UV5-5	UBP48_HUMAN	USP48	Isoform 5 of Ubiquitin carboxyl-terminal hydrolase 48	30668.2	21079.1	11523.5
Q86UY8;Q86UY8-2	Q86UY8;Q86UY8-2	NT5D3_HUMAN	NT5DC3	5'-nucleotidase domain-containing protein 3	86464.9	93732.6	85189.6	57097.5	52202.2	50397
Q86V21;Q86V21-2	Q86V21;Q86V21-2	AACS_HUMAN	AACS	Acetoacetyl-CoA synthetase	10596.3		10465.3	34058.1	29737.5	38513.7
Q86V81	Q86V81	THOC4_HUMAN	ALYREF	THO complex subunit 4	133452	145336	203990	194428	220513	207296
Q86VM9	Q86VM9	ZCH18_HUMAN	ZC3H18	Zinc finger CCCH domain-containing protein 18	47584.4	50235.2	52001.2	49350.5	63188.9	57248.5
Q86VN1	Q86VN1	VPS36_HUMAN	VPS36	Vacuolar protein-sorting-associated protein 36	72936.2	68286.1	50045.9	58540.6	51346.7	49719.5
Q86VP6	Q86VP6	CAND1_HUMAN	CAND1	Cullin-associated NEDD8-dissociated protein 1	92164.8	106432	99298.6	570911	474843	433774
Q86W42;Q86W42-2	Q86W42;Q86W42-2;Q86W42-3	THOC6_HUMAN	THOC6	THO complex subunit 6 homolog	29637.1	21965.7		24416.1	25302	23381.8
Q86WB0;Q86WB0-2	Q86WB0;Q86WB0-2	ZC3C1_HUMAN	ZC3HC1	Zinc finger C3HC-type protein 1	18243.1	15055.5	20354.2	16609.2	13868.9
Q86WP2;Q86WP2-2;Q86WP2-3	Q86WP2;Q86WP2-2;Q86WP2-3	GPBP1_HUMAN	GPBP1	Vasculin		15738.6	15026	14791.3
Q86WQ0;Q86WQ0-2	Q86WQ0;Q86WQ0-2	NR2CA_HUMAN	NR2C2AP	Nuclear receptor 2C2-associated protein	45810	50927.3	57278.1	82743	71647.5	86268.2
Q86WR0	Q86WR0	CCD25_HUMAN	CCDC25	Coiled-coil domain-containing protein 25	15076.2	14882.2	8095.81
Q86X55;Q86X55-1	Q86X55;Q86X55-1;Q86X55-2	CARM1_HUMAN	CARM1	Histone-arginine methyltransferase CARM1	459818	390699	317558	404508	486663	331352
Q86X76;Q86X76-2;Q86X76-4	Q86X76;Q86X76-2;Q86X76-4	NIT1_HUMAN	NIT1	Deaminated glutathione amidase	48266.5	42832.5	41544	16863.4	15828.1
Q86X83;Q86X83-2	Q86X83;Q86X83-2	COMD2_HUMAN	COMMD2	COMM domain-containing protein 2				50856.8	31681.1	36936.7
Q86XP3;Q86XP3-2	Q86XP3;Q86XP3-2	DDX42_HUMAN	DDX42	ATP-dependent RNA helicase DDX42	23924.3			78903.2	95212.1	88203.9
Q86XR7-2;Q9Y3B3;Q9Y3B3-2	Q9Y3B3;Q86XR7-2;Q9Y3B3-2	TCAM2_HUMAN;TMED7_HUMAN	TICAM2;TMED7	Isoform 2 of TIR domain-containing adapter molecule 2	120675	166896	155114	49307.2	39205.3	19445.7
Q86Y13;Q86Y13-2	Q86Y13;Q86Y13-2	DZIP3_HUMAN	DZIP3	E3 ubiquitin-protein ligase DZIP3	79411.9			32354.7		34984.5
Q86Y56	Q86Y56;Q86Y56-2	DAAF5_HUMAN	DNAAF5	Dynein axonemal assembly factor 5				89800	59619.6	61479.9
Q86YZ3	Q86YZ3	HORN_HUMAN	HRNR	Hornerin	163403	525814	121443	402694	219168	131456
Q8IU81	Q8IU81	I2BP1_HUMAN	IRF2BP1	Interferon regulatory factor 2-binding protein 1				50198.4	46508.6	35235.8
Q8IUD2;Q8IUD2-2;Q8IUD2-3;Q8IUD2-4;Q8IUD2-5	Q8IUD2;Q8IUD2-2;Q8IUD2-3;Q8IUD2-4;Q8IUD2-5	RB6I2_HUMAN	ERC1	ELKS/Rab6-interacting/CAST family member 1	26733.7	23035.8		46345.8	91299.1	110891
Q8IWB7	Q8IWB7	WDFY1_HUMAN	WDFY1	WD repeat and FYVE domain-containing protein 1	86243.1	84746.2	89175.7
Q8IWU5	Q8IWU5;Q8IWU5-2	SULF2_HUMAN	SULF2	Extracellular sulfatase Sulf-2	24310.8	27006.9	26420	20458.3	17881.1
Q8IWW6;Q8IWW6-2;Q8IWW6-3;Q8IWW6-4	Q8IWW6;Q8IWW6-2;Q8IWW6-3;Q8IWW6-4	RHG12_HUMAN	ARHGAP12	Rho GTPase-activating protein 12	6942.47	10325.1			7246.4
Q8IX12;Q8IX12-2	Q8IX12;Q8IX12-2	CCAR1_HUMAN	CCAR1	Cell division cycle and apoptosis regulator protein 1	46246.6	30830.8	45591.7	54995.5	55787.4	77636
Q8IX18;Q8IX18-2;Q8IX18-3;Q8IX18-4	Q8IX18;Q8IX18-2;Q8IX18-3;Q8IX18-4	DHX40_HUMAN	DHX40	Probable ATP-dependent RNA helicase DHX40	28285.9	27233.4	19862.8	21060.5	26316.6	15201.3
Q8IXH7;Q8IXH7-4	Q8IXH7;Q8IXH7-4	NELFD_HUMAN	NELFCD	Negative elongation factor C/D				91790.9	49626.3	72253.8
Q8IXT5	Q8IXT5	RB12B_HUMAN	RBM12B	RNA-binding protein 12B	11991.7	8188.37	9704.99	24474.7	31786	41092
Q8IYB3;Q8IYB3-2	Q8IYB3;Q8IYB3-2	SRRM1_HUMAN	SRRM1	Serine/arginine repetitive matrix protein 1	15014.5	24491.7	27604.3	13244.4	17523.4	18517.6
Q8IYB5;Q8IYB5-2;Q8IYB5-3	Q8IYB5;Q8WU79;Q8IYB5-2;Q8WU79-2;Q8IYB5-3	SMAP1_HUMAN	SMAP1	Stromal membrane-associated protein 1	40761.6	53864.2	36967	48237.3	37669.3	36154.7
Q8IYQ7	Q8IYQ7	THNS1_HUMAN	THNSL1	Threonine synthase-like 1	38586.4	45885.1	81404.1	66104.5	46825.9
Q8IYT4;Q8IYT4-2	Q8IYT4;Q8IYT4-2	KATL2_HUMAN	KATNAL2	Katanin p60 ATPase-containing subunit A-like 2	213620	254499	290240	390313	460797	410214
Q8IZ83;Q8IZ83-3	Q8IZ83;Q8IZ83-3	A16A1_HUMAN	ALDH16A1	Aldehyde dehydrogenase family 16 member A1	77999	69103.6	63812.5	27057	41795.6	62324.4
Q8IZL8	Q8IZL8	PELP1_HUMAN	PELP1	Proline-, glutamic acid- and leucine-rich protein 1				26658.8	17004.2	9282.87
Q8N0U2	Q8N0U2	TMM61_HUMAN	TMEM61	Transmembrane protein 61	42738.4	40151	54971	16601.7	44935.7
Q8N0W3;Q8N0W3-2	Q8N0W3;Q8N0W3-2	FCSK_HUMAN	FCSK	L-fucose kinase	67789.5	74841.5	56150.1	96805.4	96904.1	118543
Q8N142	Q8N142	PURA1_HUMAN	ADSS1	Adenylosuccinate synthetase isozyme 1	87542.1	90523	119496	162896	176551	154911
Q8N163;Q8N163-2	Q8N163;Q8N163-2	CCAR2_HUMAN	CCAR2	Cell cycle and apoptosis regulator protein 2	62134.4	58997.6	63319.3	67130.2	65917.3	56342.2
Q8N1F7	Q8N1F7;Q8N1F7-2	NUP93_HUMAN	NUP93	Nuclear pore complex protein Nup93	47351.3	46317.8	48573.7	103867	91464.4	91610.3
Q8N1G2	Q8N1G2	CMTR1_HUMAN	CMTR1	Cap-specific mRNA (nucleoside-2'-O-)-methyltransferase 1	96992.5	91558	80777	53669.7	65885.8	71315.5
Q8N1G4	Q8N1G4	LRC47_HUMAN	LRRC47	Leucine-rich repeat-containing protein 47	265221	264627	277236	255286	229109	243136
Q8N1N4;Q8N1N4-2	Q8N1N4;Q8N1N4-2	K2C78_HUMAN	KRT78	Keratin, type II cytoskeletal 78	37609.8	59182.6	31880.1	68651.1	39918.1
Q8N335	Q8N335	GPD1L_HUMAN	GPD1L	Glycerol-3-phosphate dehydrogenase 1-like protein	20743.2	13457.1	8306.48	85423.3	68717.5	77531.1
Q8N4J0	Q8N4J0	CARME_HUMAN	CARNMT1	Carnosine N-methyltransferase	137343	179654	141775	77693.7	167143	108951
Q8N543	Q8N543;Q8N543-2	OGFD1_HUMAN	OGFOD1	Prolyl 3-hydroxylase OGFOD1	140045	122642	146518	82363.1	92215.2	88612.9
Q8N5C7;Q8N5C7-2	Q8N5C7;Q8N5C7-2	DTWD1_HUMAN	DTWD1	tRNA-uridine aminocarboxypropyltransferase 1	9262.7	12430.6		24002.9	15732.6	4425.45
Q8N5I2	Q8N5I2	ARRD1_HUMAN	ARRDC1	Arrestin domain-containing protein 1	71431.1	70471.3	76771.5	67972.4	57051.3	79487.8
Q8N5M1	Q8N5M1	ATPF2_HUMAN	ATPAF2	ATP synthase mitochondrial F1 complex assembly factor 2	35466.1	53966.1	55165.5
Q8N5M4	Q8N5M4	TTC9C_HUMAN	TTC9C	Tetratricopeptide repeat protein 9C				42091.1	52651.2	59703.2
Q8N684;Q8N684-2;Q8N684-3	Q8N684;Q8N684-3;Q8N684-2	CPSF7_HUMAN	CPSF7	Cleavage and polyadenylation specificity factor subunit 7	21065.6	26501.3	31686.8	33202.2	35940.2	39324.8
Q8N6H7	Q8N6H7;Q8N6H7-2	ARFG2_HUMAN	ARFGAP2	ADP-ribosylation factor GTPase-activating protein 2	262163	185032	181035	176835	130378	121542
Q8N6M0	Q8N6M0	OTU6B_HUMAN	OTUD6B	Deubiquitinase OTUD6B	1350000	738750	522454	38165.3	26919.3	31738
Q8N6R0;Q8N6R0-3;Q8N6R0-4	Q8N6R0;Q8N6R0-1;Q8N6R0-2;Q8N6R0-3;Q8N6R0-4	EFNMT_HUMAN	METTL13	eEF1A lysine and N-terminal methyltransferase	37814.8	26012.9	35918.4	64023.3	47583.1	60265.2
Q8N6T3	Q8N6T3;Q8N6T3-3;Q8N6T3-2;Q8N6T3-4;Q8N6T3-5	ARFG1_HUMAN	ARFGAP1	ADP-ribosylation factor GTPase-activating protein 1	90279.7	85367.1	104115	68221.9	97355.1	87176.2
Q8N7H5;Q8N7H5-3	Q8N7H5;Q8N7H5-3	PAF1_HUMAN	PAF1	RNA polymerase II-associated factor 1 homolog	65554.1	60579.2	50230.2	69948.4	67897.7	53974.6
Q8N806	Q8N806	UBR7_HUMAN	UBR7	Putative E3 ubiquitin-protein ligase UBR7	23336.8	23587	19203.8	21703.5	16173.9	27396.5
Q8N999	Q8N999	RLIG1_HUMAN	RLIG1	RNA ligase 1		32264.7			29374.7
Q8NB14	Q8NB14;Q8NB14-2	UBP38_HUMAN	USP38	Ubiquitin carboxyl-terminal hydrolase 38	233844	247836	275447
Q8NBF2	Q8NBF2;Q8NBF2-2	NHLC2_HUMAN	NHLRC2	NHL repeat-containing protein 2	840251	811261	754833	854770	805768	814304
Q8NBF6;Q8NBF6-2	Q8NBF6;Q8NBF6-2	AVL9_HUMAN	AVL9	Late secretory pathway protein AVL9 homolog	49039.3	107813	48793.5	50740.7	59743.9	48157.7
Q8NBJ5	Q8NBJ5	GT251_HUMAN	COLGALT1	Procollagen galactosyltransferase 1	56303.2	72799.6	54901.2	41684.9	38530	32169.4
Q8NBS9;Q8NBS9-2	Q8NBS9;Q8NBS9-2	TXND5_HUMAN	TXNDC5	Thioredoxin domain-containing protein 5	43951.3	56596	40596.8	53632.6	57640.6	36041.5
Q8NBX0	Q8NBX0	SCPDL_HUMAN	SCCPDH	Saccharopine dehydrogenase-like oxidoreductase	47635.7	37864.4	57211.5
Q8NC51;Q8NC51-3	Q8NC51;Q8NC51-3	SERB1_HUMAN	SERBP1	SERPINE1 mRNA-binding protein 1	77923	51171.1	114284	159572	158167	154440
Q8NCN5	Q8NCN5	PDPR_HUMAN	PDPR	Pyruvate dehydrogenase phosphatase regulatory subunit, mitochondrial	69044	69247	66312.4	36835.9	35866.2	16843.4
Q8NCW5;Q8NCW5-2	Q8NCW5;Q8NCW5-2	NNRE_HUMAN	NAXE	NAD(P)H-hydrate epimerase	234825	226763	243927	183708	252714	212515
Q8ND04;Q8ND04-2;Q8ND04-3	Q8ND04;Q8ND04-2;Q8ND04-3	SMG8_HUMAN	SMG8	Nonsense-mediated mRNA decay factor SMG8	33644.9	32717.5	34600.2	44894.8	29752.3	21381.3
Q8NDH3;Q8NDH3-2;Q8NDH3-3	Q8NDH3;Q8NDH3-5;Q8NDH3-2;Q8NDH3-3;Q8NDH3-4	PEPL1_HUMAN	NPEPL1	Probable aminopeptidase NPEPL1	161954	177132	189295	215703	254624	247593
Q8NE71;Q8NE71-2	Q8NE71;Q8NE71-2	ABCF1_HUMAN	ABCF1	ATP-binding cassette sub-family F member 1	39676.4	69833.8	51472	89290	54893.7	63223.4
Q8NEZ5	Q8NEZ5;Q8NEZ5-2;Q8NEZ5-3	FBX22_HUMAN	FBXO22	F-box only protein 22	100861	99409.8	94646.8	35927.9	52495.7	51739.4
Q8NF37	Q8NF37	PCAT1_HUMAN	LPCAT1	Lysophosphatidylcholine acyltransferase 1	7339.33	12414	8252.67	47365.6	33205.4	32508.3
Q8NF91;Q8NF91-2;Q8NF91-4;Q8NF91-8	Q8NF91;Q8NF91-2;Q8NF91-4;Q8NF91-8	SYNE1_HUMAN	SYNE1	Nesprin-1	374258	322447	350360	430493	459807	388119
Q8NFA0	Q8NFA0	UBP32_HUMAN	USP32	Ubiquitin carboxyl-terminal hydrolase 32	5610000	5520000	6860000	395731	440459	428431
Q8NFH3	Q8NFH3	NUP43_HUMAN	NUP43	Nucleoporin Nup43	58448.9	48605.4	54917.2	33023	34464.4	21802.3
Q8NFH4	Q8NFH4	NUP37_HUMAN	NUP37	Nucleoporin Nup37	58909.7	43391.3	56967.1	32274.3	26052.7	19901.1
Q8NFV4;Q8NFV4-4	Q8NFV4;Q8NFV4-4;Q8NFV4-6	ABHDB_HUMAN	ABHD11	Protein ABHD11	138731	134910	141203	205756	121888	118366
Q8NHP8;Q8NHP8-2	Q8NHP8;Q8NHP8-2	PLBL2_HUMAN	PLBD2	Putative phospholipase B-like 2	127786	142014	193718	187952	264499	230193
Q8TAC2;Q8TAC2-2	Q8TAC2;Q8TAC2-2	JOS2_HUMAN	JOSD2	Josephin-2	89360.1	53565.4	34145.4
Q8TAQ2;Q8TAQ2-2;Q8TAQ2-3	Q8TAQ2;Q92922;Q8TAQ2-2;Q8TAQ2-3	SMRC2_HUMAN	SMARCC2	SWI/SNF complex subunit SMARCC2		27051.3	21378.2	91760.5	72769.4	72241.8
Q8TAT6;Q8TAT6-2	Q8TAT6;Q8TAT6-2	NPL4_HUMAN	NPLOC4	Nuclear protein localization protein 4 homolog	174890	150367	164698	148866	142861	175293
Q8TB03;Q8TB03-3	Q8TB03;Q8TB03-3	CX038_HUMAN	CXorf38	Uncharacterized protein CXorf38				64195.2	62345.1	68941.3
Q8TB45	Q8TB45;Q8TB45-2	DPTOR_HUMAN	DEPTOR	DEP domain-containing mTOR-interacting protein	70704.5	72435.4	65294.9	57052.3	28873.5	30868.2
Q8TBX8	Q8TBX8;Q8TBX8-2;Q8TBX8-3	PI42C_HUMAN	PIP4K2C	Phosphatidylinositol 5-phosphate 4-kinase type-2 gamma	194634	190518	232266	303045	290448	209443
Q8TC07;Q8TC07-2;Q8TC07-3	Q8TC07;Q8TC07-2;Q8TC07-3	TBC15_HUMAN	TBC1D15	TBC1 domain family member 15	8515.7			22847.8	20335.8	19697.2
Q8TCD5	Q8TCD5	NT5C_HUMAN	NT5C	5'(3')-deoxyribonucleotidase, cytosolic type	28936.2	27266.4	27575.8	34740.1	30910.4
Q8TCS8	Q8TCS8	PNPT1_HUMAN	PNPT1	Polyribonucleotide nucleotidyltransferase 1, mitochondrial	71083.4	71685.8	60201.5	46096.7	44417.9	42125.9
Q8TCU6;Q8TCU6-3	Q8TCU6;Q8TCU6-3	PREX1_HUMAN	PREX1	Phosphatidylinositol 3,4,5-trisphosphate-dependent Rac exchanger 1 protein	37528.2	34863.6	35444.8	47221.6	39112.3	42132.5
Q8TD06	Q8TD06	AGR3_HUMAN	AGR3	Anterior gradient protein 3				77383.6	48896.2	44350.6
Q8TD30;Q8TD30-2	Q8TD30;Q8TD30-2	ALAT2_HUMAN	GPT2	Alanine aminotransferase 2	30281.3	24895.6	6374.6	51262.4		49261.2
Q8TE77;Q8TE77-2	Q8TE77;Q8TE77-2;Q8TE77-3	SSH3_HUMAN	SSH3	Protein phosphatase Slingshot homolog 3	12224.8	13019.2		50617.5	38864.3	43388.6
Q8TEA8	Q8TEA8	DTD1_HUMAN	DTD1	D-aminoacyl-tRNA deacylase 1	38087.8	21086.4	26455.1	41650	43645.3	29138.9
Q8TEB1;Q8TEB1-2	Q8TEB1;Q8TEB1-2;Q8TEB1-3	DCA11_HUMAN	DCAF11	DDB1- and CUL4-associated factor 11	81087.8	74931.6	77097.5	53173.9	30323.3	18950.8
Q8TEQ6	Q8TEQ6	GEMI5_HUMAN	GEMIN5	Gem-associated protein 5	86888.4	68643.3	77318.1	111741	102558	111466
Q8TEX9;Q8TEX9-2	Q8TEX9;Q8TEX9-2	IPO4_HUMAN	IPO4	Importin-4	22046.2	14692.8		76015.3	50665.1	59196
Q8TEY7;Q8TEY7-2;Q8TEY7-3	Q8TEY7;Q8TEY7-2;Q8TEY7-3	UBP33_HUMAN	USP33	Ubiquitin carboxyl-terminal hydrolase 33	101064	105992	123950
Q8WTS6	Q8WTS6	SETD7_HUMAN	SETD7	Histone-lysine N-methyltransferase SETD7			9254.87	47608.3	53768.2	51408
Q8WUA2	Q8WUA2	PPIL4_HUMAN	PPIL4	Peptidyl-prolyl cis-trans isomerase-like 4				35312.6	36226.2	34989.2
Q8WUM4;Q8WUM4-2	Q8WUM4;Q8WUM4-2	PDC6I_HUMAN	PDCD6IP	Programmed cell death 6-interacting protein	79506.8	72971	66647.7	538355	397688	411627
Q8WUW1;Q8WUW1-2	Q8WUW1;Q8WUW1-2	BRK1_HUMAN	BRK1	Protein BRICK1				16646.7	12439.9
Q8WV24	Q8WV24	PHLA1_HUMAN	PHLDA1	Pleckstrin homology-like domain family A member 1	15546.9	27538.7	25354.7
Q8WVC0;Q8WVC0-2	Q8WVC0;Q8WVC0-2	LEO1_HUMAN	LEO1	RNA polymerase-associated protein LEO1				12151.4	15236.6	17250.3
Q8WVM8	Q8WVM8	SCFD1_HUMAN	SCFD1	Sec1 family domain-containing protein 1				17024	17286.5	11367.6
Q8WVV4;Q8WVV4-1	Q8WVV4;Q8WVV4-1;Q8WVV4-3	POF1B_HUMAN	POF1B	Protein POF1B	43409.7	23825	15559.5	71141.3	49320.8	66939.5
Q8WVV9;Q8WVV9-4;Q8WVV9-5	Q8WVV9;Q8WVV9-3;Q8WVV9-2;Q8WVV9-4;Q8WVV9-5	HNRLL_HUMAN	HNRNPLL	Heterogeneous nuclear ribonucleoprotein L-like	146358	143197	127070	103957	77090.9	95434.9
Q8WW12;Q8WW12-3	Q8WW12;Q8WW12-3	PCNP_HUMAN	PCNP	PEST proteolytic signal-containing nuclear protein	10001.4	11027
Q8WW59	Q8WW59	SPRY4_HUMAN	SPRYD4	SPRY domain-containing protein 4	223008	212119	220801	128577	180631	112580
Q8WWM7;Q8WWM7-2;Q8WWM7-3;Q8WWM7-4;Q8WWM7-5;Q8WWM7-6;Q8WWM7-8;Q8WWM7-9	Q8WWM7;Q8WWM7-2;Q8WWM7-3;Q8WWM7-4;Q8WWM7-5;Q8WWM7-6;Q8WWM7-8;Q8WWM7-9	ATX2L_HUMAN	ATXN2L	Ataxin-2-like protein	474906	631053	161649	387659	527099	412473
Q8WWY3;Q8WWY3-2;Q8WWY3-3;Q8WWY3-4	Q8WWY3;Q8WWY3-2;Q8WWY3-3;Q8WWY3-4	PRP31_HUMAN	PRPF31	U4/U6 small nuclear ribonucleoprotein Prp31	6339.25	5721.73	8007.21	27816		19088.8
Q8WX92;Q8WX92-2	Q8WX92;Q8WX92-2	NELFB_HUMAN	NELFB	Negative elongation factor B	28506.3	21722	22714.8	122291	63386.1	79835.7
Q8WYA6;Q8WYA6-2;Q8WYA6-3;Q8WYA6-4	Q8WYA6;Q8WYA6-2;Q8WYA6-3;Q8WYA6-4	CTBL1_HUMAN	CTNNBL1	Beta-catenin-like protein 1				46083.7	41674.1	36641.3
Q8WZ42-12	Q8WZ42-12	TITIN_HUMAN	TTN	Isoform 12 of Titin	79162.8	49673.4	96667.1	154538	116983	170192
Q8WZ82	Q8WZ82	OVCA2_HUMAN	OVCA2	Esterase OVCA2	4907.52			28842.1	27390.3	19958.1
Q8WZA9	Q8WZA9	IRGQ_HUMAN	IRGQ	Immunity-related GTPase family Q protein				71721.9	41023.6	47143.8
Q92499	Q92499;Q92499-2;Q92499-3	DDX1_HUMAN	DDX1	ATP-dependent RNA helicase DDX1	253868	239961	272148	275216	283358	301948
Q92522	Q92522	H1X_HUMAN	H1-10	Histone H1.10		14813.2	17534	26456.1	14318.9
Q92530	Q92530	PSMF1_HUMAN	PSMF1	Proteasome inhibitor PI31 subunit	340043	340884	356886	287027	175896	164052
Q92544	Q92544	TM9S4_HUMAN	TM9SF4	Transmembrane 9 superfamily member 4	68715.7	58060.6	78742.1	32205.3	32972.4	32029.1
Q92560	Q92560	BAP1_HUMAN	BAP1	Ubiquitin carboxyl-terminal hydrolase BAP1	117878	97410.5	99671		45918.3	49174.3
Q92572	Q92572	AP3S1_HUMAN	AP3S1	AP-3 complex subunit sigma-1	15923.3	22708.2	21534.6	47134.6	38013.9	40796.1
Q92597;Q92597-2;Q92597-3	Q92597;Q92597-2;Q92597-3	NDRG1_HUMAN	NDRG1	Protein NDRG1	59455.5	65138.6		89993.7	101513	98312.6
Q92598;Q92598-2;Q92598-3	Q92598;Q92598-2;Q92598-3;Q92598-4	HS105_HUMAN	HSPH1	Heat shock protein 105 kDa	324478	297328	275834	285835	267128	237811
Q92599;Q92599-2;Q92599-4	Q14141;Q92599;Q9NVA2;Q14141-2;Q14141-3;Q14141-4;Q92599-2;Q92599-3;Q92599-4;Q9NVA2-2	SEPT8_HUMAN	SEPTIN8	Septin-8	160776	156109	154989	160784	111147	90581
Q92616	Q92616	GCN1_HUMAN	GCN1	Stalled ribosome sensor GCN1	22621.9	27251.3	17938.9	162484	108554	104179
Q92667;Q92667-2	Q92667;Q92667-2	AKAP1_HUMAN	AKAP1	A-kinase anchor protein 1, mitochondrial	36761	21830.6	22403.9	45408.3	28176.8	16040.7
Q92688;Q92688-2	Q92688;Q92688-2	AN32B_HUMAN	ANP32B	Acidic leucine-rich nuclear phosphoprotein 32 family member B	96001.3	93678.3	77814.2	446606	514489	520236
Q92696	Q92696	PGTA_HUMAN	RABGGTA	Geranylgeranyl transferase type-2 subunit alpha	121164	100612	98470	73583.1		59190.7
Q92734;Q92734-2;Q92734-3;Q92734-4	Q92734;Q92734-2;Q92734-3;Q92734-4	TFG_HUMAN	TFG	Protein TFG	43303.7	35666.2	50929.6	135107	113613	115623
Q92747	Q92747;Q92747-2	ARC1A_HUMAN	ARPC1A	Actin-related protein 2/3 complex subunit 1A	382082	337034	348844	160917	198164	151086
Q92769;Q92769-3	Q92769;Q92769-3	HDAC2_HUMAN	HDAC2	Histone deacetylase 2	633240	613983	698593	464544	558821	403126
Q92783;Q92783-2	O75886;Q92783;Q92783-2	STAM1_HUMAN	STAM	Signal transducing adapter molecule 1				34756.9	27148.2	23515
Q92797	Q92797	SYMPK_HUMAN	SYMPK	Symplekin				31053.3	23993.9	11219.4
Q92804;Q92804-2	Q92804;Q92804-2	RBP56_HUMAN	TAF15	TATA-binding protein-associated factor 2N	131234	198204	203789	181652	249604	214094
Q92817	Q92817	EVPL_HUMAN	EVPL	Envoplakin				48882	37247.8	43093.3
Q92841-2	Q92841;Q92841-1;Q92841-2;Q92841-3	DDX17_HUMAN	DDX17	Isoform 3 of Probable ATP-dependent RNA helicase DDX17	107282	117637	125244	189949	197432	228362
Q92878;Q92878-2;Q92878-3	Q92878;Q92878-2;Q92878-3	RAD50_HUMAN	RAD50	DNA repair protein RAD50	40505.6	36470	61257.6	89429.2	57018.1	51832.6
Q92882	Q92882	OSTF1_HUMAN	OSTF1	Osteoclast-stimulating factor 1				31535.3	32065	24751.9
Q92888;Q92888-2;Q92888-3;Q92888-4	Q92888;Q92888-2;Q92888-3;Q92888-4	ARHG1_HUMAN	ARHGEF1	Rho guanine nucleotide exchange factor 1	40362.9	33981.7	44352.9	123368	63663.2	69339.1
Q92890;Q92890-1	Q92890;Q92890-1;Q92890-3	UFD1_HUMAN	UFD1	Ubiquitin recognition factor in ER-associated degradation protein 1	82190.2	103210	114392	136780	90624.4	140630
Q92900;Q92900-2	Q92900;Q92900-2	RENT1_HUMAN	UPF1	Regulator of nonsense transcripts 1	123542	111953	91299.5	121640	121973	120710
Q92905	Q92905	CSN5_HUMAN	COPS5	COP9 signalosome complex subunit 5	48626.4	57284.9	56978	40556.2	35273.8	26169.7
Q92917	Q92917	GPKOW_HUMAN	GPKOW	G-patch domain and KOW motifs-containing protein				48303.7	37887.1	33578.8
Q92925;Q92925-2;Q92925-3	Q92925;Q92925-2;Q92925-3	SMRD2_HUMAN	SMARCD2	SWI/SNF-related matrix-associated actin-dependent regulator of chromatin subfamily D member 2	126207	147539	149689	192871	200670	124782
Q92945	Q92945	FUBP2_HUMAN	KHSRP	Far upstream element-binding protein 2	37571.1	31296.6	39683.6	183656	197521	256201
Q92973;Q92973-2	Q92973;Q92973-2;Q92973-3	TNPO1_HUMAN	TNPO1	Transportin-1	31229.7	46392.4	44203.6	262494	208149	210876
Q92989;Q92989-2	Q92989;Q92989-2	CLP1_HUMAN	CLP1	Polyribonucleotide 5'-hydroxyl-kinase Clp1	101117	95889.1	97184.1	89535.8	94248.1	95051.7
Q92995;Q92995-2	Q92995;Q92995-2	UBP13_HUMAN	USP13	Ubiquitin carboxyl-terminal hydrolase 13	34056.5	26318.6	30912	20474.7	17481.1	15428.7
Q93008;Q93008-3	O00507;Q93008;O00507-2;Q93008-3	USP9X_HUMAN	USP9X	Probable ubiquitin carboxyl-terminal hydrolase FAF-X	5590000	5910000	6870000	135958	114476	123092
Q93009	Q93009;Q93009-3	UBP7_HUMAN	USP7	Ubiquitin carboxyl-terminal hydrolase 7	9440000	9960000	11800000	608259	791821	760106
Q93052	Q93052	LPP_HUMAN	LPP	Lipoma-preferred partner	6057.14	13016.7	8481.81	51641.4	55787.4	54388.8
Q969E2;Q969E2-2	Q969E2;Q969E2-2	SCAM4_HUMAN	SCAMP4	Secretory carrier-associated membrane protein 4	82224.2	70355.9	54800.4	36412.7	37106.2	44349.6
Q969H8	Q969H8	MYDGF_HUMAN	MYDGF	Myeloid-derived growth factor	221289	237223	176633	108315	162256	111816
Q969M3;Q969M3-3	Q969M3;Q969M3-2;Q969M3-3	YIPF5_HUMAN	YIPF5	Protein YIPF5	108377	82514.5	79609.5	32442.2	29434	45135.4
Q969Q0	P83881;Q969Q0	RL36L_HUMAN	RPL36AL	Ribosomal protein eL42-like	249682	311922	270840	143731	147225	127080
Q969T9;Q969T9-2	Q969T9;Q969T9-2	WBP2_HUMAN	WBP2	WW domain-binding protein 2	14071.2	21886.1	22343.7	33099	26599.6	28561.7
Q969U7;Q969U7-2	Q969U7;Q969U7-2	PSMG2_HUMAN	PSMG2	Proteasome assembly chaperone 2	38501.1	38645.4	32489.2	26455.8	36867.1
Q969Z0	Q969Z0;Q969Z0-2	FAKD4_HUMAN	TBRG4	FAST kinase domain-containing protein 4	52892.3	70391.3	59502.2	200261
Q96A33;Q96A33-2	Q96A33;Q96A33-2	CCD47_HUMAN	CCDC47	PAT complex subunit CCDC47			32542.9	49638.8
Q96A65	Q96A65	EXOC4_HUMAN	EXOC4	Exocyst complex component 4				25533.9	15544.7	13336.4
Q96AB6	Q96AB6	NTAN1_HUMAN	NTAN1	Protein N-terminal asparagine amidohydrolase	31535	24402
Q96AC1;Q96AC1-2;Q96AC1-3	Q96AC1;Q96AC1-2;Q96AC1-3	FERM2_HUMAN	FERMT2	Fermitin family homolog 2	105554	80846.4	94744.5	70453.2	47698.9	35698.7
Q96AE4;Q96AE4-2	Q96AE4;Q96AE4-2	FUBP1_HUMAN	FUBP1	Far upstream element-binding protein 1	19548.6	20813.2	31473.4	88084	76331.5	99356.5
Q96AG4	Q96AG4	LRC59_HUMAN	LRRC59	Leucine-rich repeat-containing protein 59	24996.2		19653	61123.6	43215.9	31593.8
Q96AX1	Q96AX1	VP33A_HUMAN	VPS33A	Vacuolar protein sorting-associated protein 33A	47702.4	48509.7	41354	61021.9	78423.9	54985.8
Q96BP3	Q96BP3	PPWD1_HUMAN	PPWD1	Peptidylprolyl isomerase domain and WD repeat-containing protein 1	24659.5	40467	30612.1
Q96BZ4	Q96BZ4	PLD4_HUMAN	PLD4	5'-3' exonuclease PLD4	33084.2	52378	51249.6	57619	78073.8	41906.1
Q96C86	Q96C86	DCPS_HUMAN	DCPS	m7GpppX diphosphatase	94487.9	122537	95527.2	75130.7	85413.9	69692.8
Q96CN7	Q96CN7	ISOC1_HUMAN	ISOC1	Isochorismatase domain-containing protein 1	912704	911060	962951	360031	385636	308979
Q96CS3	Q96CS3	FAF2_HUMAN	FAF2	FAS-associated factor 2	86446	65664.1	80450.3	110055	81832.2	119931
Q96CW1;Q96CW1-2	Q96CW1;Q96CW1-2	AP2M1_HUMAN	AP2M1	AP-2 complex subunit mu	186767	217757	179289	150978	151692	122458
Q96CX6	Q96CX6	LRC58_HUMAN	LRRC58	Leucine-rich repeat-containing protein 58	22924.2	11914.3		11591.8
Q96D46	Q96D46	NMD3_HUMAN	NMD3	60S ribosomal export protein NMD3	461896	439337	372228	249824	176279	155739
Q96DC9	Q96DC9	OTUB2_HUMAN	OTUB2	Ubiquitin thioesterase OTUB2	206330	237011	252743
Q96DE0;Q96DE0-3;Q9BRJ7	Q96DE0;Q9BRJ7;Q96DE0-3	NUD16_HUMAN;TIRR_HUMAN	NUDT16;NUDT16L1	U8 snoRNA-decapping enzyme	55853.7	66802.1	60044.2	78468.5	74004	59482.6
Q96DG6	Q96DG6	CMBL_HUMAN	CMBL	Carboxymethylenebutenolidase homolog	329777	342079	321919	226458	298889	260752
Q96DH6;Q96DH6-2	Q96DH6;Q96DH6-2	MSI2H_HUMAN	MSI2	RNA-binding protein Musashi homolog 2	59384	199349	141268	299991	255788	287016
Q96DI7	Q96DI7;Q96DI7-2	SNR40_HUMAN	SNRNP40	U5 small nuclear ribonucleoprotein 40 kDa protein	117348	109012	118125	65260.3	80905	52586.6
Q96DV4	Q96DV4	RM38_HUMAN	MRPL38	Large ribosomal subunit protein mL38	15645.3	24918.1	15391.4		19195.5
Q96EE3;Q96EE3-1	Q96EE3;Q96EE3-1	SEH1_HUMAN	SEH1L	Nucleoporin SEH1	111104	113808	89302.4	60406.9	67693.4	60995.4
Q96EP5;Q96EP5-2	Q96EP5;Q96EP5-2	DAZP1_HUMAN	DAZAP1	DAZ-associated protein 1	47153.1	45454.9	64035.1	125342	179028	232981
Q96EY1;Q96EY1-2;Q96EY1-3	Q96EY1;Q96EY1-2;Q96EY1-3	DNJA3_HUMAN	DNAJA3	DnaJ homolog subfamily A member 3, mitochondrial	36167.9	36474	28464.5	35693.6	63899.7	31045.8
Q96EY8	Q96EY8	MMAB_HUMAN	MMAB	Corrinoid adenosyltransferase MMAB				32258	16092.1
Q96F07;Q96F07-2	Q7L576;Q96F07;Q7L576-2;Q7L576-3;Q96F07-2	CYFP2_HUMAN	CYFIP2	Cytoplasmic FMR1-interacting protein 2	40399.1	28360.1	41364	104902	77186.2	93477.3
Q96FV2;Q96FV2-2	Q96FV2;Q96FV2-2	SCRN2_HUMAN	SCRN2	Secernin-2	83227.8	61636.3	20680.4
Q96FW1	Q96FW1;Q96FW1-2	OTUB1_HUMAN	OTUB1	Ubiquitin thioesterase OTUB1	32500000	27200000	20800000	1760000	1980000	1720000
Q96FZ2	Q96FZ2	HMCES_HUMAN	HMCES	Abasic site processing protein HMCES	12201.9	9552.77	33348.6	22496.1		17455.7
Q96G03	Q96G03;Q96G03-2	PGM2_HUMAN	PGM2	Phosphopentomutase	212846	220977	255297	133437	154016	134399
Q96G74;Q96G74-5	Q96G74;Q96G74-2;Q96G74-4;Q96G74-5	OTUD5_HUMAN	OTUD5	OTU domain-containing protein 5	71263.7	38378.4	30070.3
Q96GA7	Q96GA7	SDSL_HUMAN	SDSL	Serine dehydratase-like	33340	37130.6	54702.8	93675.7	99487.9	87723.2
Q96GC9;Q96GC9-2	Q96GC9;Q96GC9-2	VMP1_HUMAN	VMP1	Vacuole membrane protein 1	21785.2	35243.9	29362.1	27662	18594.9	12086
Q96GX2	Q96GX2	A7L3B_HUMAN	ATXN7L3B	Ataxin-7-like protein 3B	113326	105558	112885	85694.3	84857.5	94490.4
Q96GY0	Q96GY0	ZC21A_HUMAN	ZC2HC1A	Zinc finger C2HC domain-containing protein 1A		9737.89		22318.5
Q96HA8;Q96HA8-2	Q96HA8;Q96HA8-2	NTAQ1_HUMAN	NTAQ1	Protein N-terminal glutamine amidohydrolase		5562.59			15998.7
Q96HC4;Q96HC4-4;Q96HC4-6;Q96HC4-7	Q96HC4;Q96HC4-3;Q96HC4-2;Q96HC4-4;Q96HC4-6;Q96HC4-7	PDLI5_HUMAN	PDLIM5	PDZ and LIM domain protein 5	28458	26253	29324.8	95248.2	101184	94598.6
Q96HE7	Q96HE7	ERO1A_HUMAN	ERO1A	ERO1-like protein alpha	74392.1	78207	73826.8	95015.4	93062.5	91527.3
Q96HJ9-2;Q9Y383;Q9Y383-2;Q9Y383-3	Q9NQ29;Q9Y383;Q9NQ29-2;Q9NQ29-3;Q96HJ9-2;Q9Y383-2;Q9Y383-3	FMC1_HUMAN;LC7L2_HUMAN	FMC1;LUC7L2	Isoform 2 of Protein FMC1 homolog	19698.2	16313.9	15735	41655.1	63774.3	64224.5
Q96HY7	Q96HY7	DHTK1_HUMAN	DHTKD1	2-oxoadipate dehydrogenase complex component E1	119027	151274	144704	111099	125432	126564
Q96I24	Q96I24	FUBP3_HUMAN	FUBP3	Far upstream element-binding protein 3		43020.5		225094	188175	223866
Q96I59;Q96I59-2	Q96I59;Q96I59-2	SYNM_HUMAN	NARS2	Probable asparagine--tRNA ligase, mitochondrial	90033.1	102686	86371	44464.2	51782.9	35825.6
Q96I99;Q96I99-2	Q96I99;Q96I99-2	SUCB2_HUMAN	SUCLG2	Succinate--CoA ligase [GDP-forming] subunit beta, mitochondrial	34177.4	25996.2		59157.5	65650.6	69835.3
Q96IJ6	Q96IJ6;Q96IJ6-2	GMPPA_HUMAN	GMPPA	Mannose-1-phosphate guanyltransferase alpha	92238.6	64408.2	92874.3	85392.9	91105.1	110224
Q96J01;Q96J01-2	Q96J01;Q96J01-2	THOC3_HUMAN	THOC3	THO complex subunit 3	81540.5	89011.2	81090.3	72584	85489.8	82683.9
Q96JH7	Q96JH7	VCIP1_HUMAN	VCPIP1	Deubiquitinating protein VCPIP1	1210000	952330	951056	42333.7	34588.4	23893.2
Q96K76-2	Q96K76-2	UBP47_HUMAN	USP47	Isoform 2 of Ubiquitin carboxyl-terminal hydrolase 47	311718	297534	365447		7240.4
Q96K76-4	Q96K76;Q96K76-2;Q96K76-4	UBP47_HUMAN	USP47	Isoform 4 of Ubiquitin carboxyl-terminal hydrolase 47	2390000	2500000	2880000	111715	131891	121036
Q96KG9;Q96KG9-2;Q96KG9-3;Q96KG9-4;Q96KG9-5;Q96KG9-6	Q96KG9;Q96KG9-4;Q96KG9-2;Q96KG9-3;Q96KG9-5;Q96KG9-6	SCYL1_HUMAN	SCYL1	N-terminal kinase-like protein	15147.3			46403.3	26339.7	31137.3
Q96KP1	Q96KP1	EXOC2_HUMAN	EXOC2	Exocyst complex component 2		10791.8		18898.2
Q96KP4;Q96KP4-2	Q96KP4;Q96KP4-2	CNDP2_HUMAN	CNDP2	Cytosolic non-specific dipeptidase	124339	131141	138838	122020	159297	121885
Q96L92;Q96L92-3	Q96L92;Q96L92-2;Q96L92-3	SNX27_HUMAN	SNX27	Sorting nexin-27	99234.8	110727	104464	57092.2	68047.5	55158.7
Q96LA8	Q96LA8;Q96LA8-2	ANM6_HUMAN	PRMT6	Protein arginine N-methyltransferase 6	134002	144203	143811	67111.1	81792.5	66206.1
Q96LX7;Q96LX7-2;Q96LX7-5	Q96LX7;Q96LX7-5;Q96LX7-2	CCD17_HUMAN	CCDC17	Coiled-coil domain-containing protein 17	11416.4	13737.6	17376.8	18849.2	23167.1
Q96M27-3	Q96M27;Q96M27-2;Q96M27-3	PRRC1_HUMAN	PRRC1	Isoform 3 of Protein PRRC1	28602.1			37987.6	49287	28718.7
Q96M69	Q96M69	LRGUK_HUMAN	LRGUK	Leucine-rich repeat and guanylate kinase domain-containing protein		19048.7	22922.6	45078.5	55771	39036.9
Q96N66	Q96N66;Q96N66-3	MBOA7_HUMAN	MBOAT7	Lysophospholipid acyltransferase 7	35988.6	34931.8	39962.8	30902.8
Q96P47;Q96P47-2;Q96P47-3;Q96P47-4;Q96P47-6	Q96P47;Q96P47-2;Q96P47-3;Q96P47-4;Q96P47-6	AGAP3_HUMAN	AGAP3	Arf-GAP with GTPase, ANK repeat and PH domain-containing protein 3	15021.7	12199.9		25796.9		7443.43
Q96P70	Q96P70	IPO9_HUMAN	IPO9	Importin-9	28552.2	32779.2	55502.2	128920	102321	81791.2
Q96PK6	Q96PK6	RBM14_HUMAN	RBM14	RNA-binding protein 14	41642.9	40114.8	44099	85917.3	64469.8	51326.4
Q96PK6-5	Q9BWF3;Q96PK6-5	RBM14_HUMAN	RBM14	Isoform 5 of RNA-binding protein 14	225310	60320.8	123347	197890	147712	182051
Q96Q11;Q96Q11-2	Q96Q11;Q96Q11-2	TRNT1_HUMAN	TRNT1	CCA tRNA nucleotidyltransferase 1, mitochondrial	64910.1	64508.8	57518.1	52777.2	57094.8	34682.4
Q96QK1	Q96QK1	VPS35_HUMAN	VPS35	Vacuolar protein sorting-associated protein 35	39949.2	37111.7		105747	99807.6	111879
Q96QR8	Q96QR8	PURB_HUMAN	PURB	Transcriptional activator protein Pur-beta		17083.2	10782.1	35330.9	39854.5	26128.3
Q96RP9	Q96RP9;Q96RP9-2	EFGM_HUMAN	GFM1	Elongation factor G, mitochondrial	167654	158839	154285	84626.9	93451.3	96552.8
Q96RQ1	Q96RQ1	ERGI2_HUMAN	ERGIC2	Endoplasmic reticulum-Golgi intermediate compartment protein 2	27808.5	34664.1	6358.13
Q96RQ3	Q96RQ3	MCCA_HUMAN	MCCC1	Methylcrotonoyl-CoA carboxylase subunit alpha, mitochondrial	96322.4	76936.1	80499	33092.1	42896.6	37630.8
Q96RS6;Q96RS6-2;Q96RS6-3	Q96RS6;Q96RS6-2;Q96RS6-3	NUDC1_HUMAN	NUDCD1	NudC domain-containing protein 1	213964	188502	173951	121348	127281	107114
Q96RU2-2	Q96RU2;Q96RU2-2;Q96RU2-3	UBP28_HUMAN	USP28	Isoform 2 of Ubiquitin carboxyl-terminal hydrolase 28	520318	502553	617924	66335.5	94829.6	89844.9
Q96S19;Q96S19-2;Q96S19-3;Q96S19-4;Q96S19-5;Q96S19-6	Q96S19;Q96S19-2;Q96S19-3;Q96S19-4;Q96S19-5;Q96S19-6	MTL26_HUMAN	METTL26	Methyltransferase-like 26	11422.5			40822	33359.9	30293.1
Q96S44	Q96S44	PRPK_HUMAN	TP53RK	EKC/KEOPS complex subunit TP53RK	46697.7	50531.2	32734.7	37784.1	34952	37451
Q96S55;Q96S55-2;Q96S55-3	Q96S55;Q96S55-2;Q96S55-3;Q96S55-4	WRIP1_HUMAN	WRNIP1	ATPase WRNIP1	149321	152247	153259	109257	74363.8	66997.8
Q96SB3	Q96SB3	NEB2_HUMAN	PPP1R9B	Neurabin-2				24104.9		14797.1
Q96SI9;Q96SI9-2	Q96SI9;Q96SI9-2	STRBP_HUMAN	STRBP	Spermatid perinuclear RNA-binding protein	67127.6	69156.1	83245.3	40806.1	50664.2	58947.2
Q96ST3	Q96ST3	SIN3A_HUMAN	SIN3A	Paired amphipathic helix protein Sin3a	40786.4	35401.9	33525.9	28850.8	26782	23575.2
Q96SU4;Q96SU4-2;Q96SU4-7	Q96SU4;Q96SU4-2;Q96SU4-6;Q96SU4-7	OSBL9_HUMAN	OSBPL9	Oxysterol-binding protein-related protein 9	129400	115743	107243	98732.2	93567.6	76309.2
Q96T76;Q96T76-5;Q96T76-7;Q96T76-8	Q96T76;Q96T76-5;Q96T76-7;Q96T76-8	MMS19_HUMAN	MMS19	MMS19 nucleotide excision repair protein homolog				51931.4	32351.4	28649.9
Q96TA1;Q96TA1-2	Q96TA1;Q96TA1-2	NIBA2_HUMAN	NIBAN2	Protein Niban 2	64721.3	48142.9	58293.8	338924	227619	242786
Q99426;Q99426-2	Q99426;Q99426-2	TBCB_HUMAN	TBCB	Tubulin-folding cofactor B	138126	142878	140875	333098	370723	342133
Q99436	Q99436	PSB7_HUMAN	PSMB7	Proteasome subunit beta type-7	67254.2	78158.4	77452.1	93363.6	107460	82311.4
Q99447;Q99447-3	Q99447;Q99447-2;Q99447-3;Q99447-4	PCY2_HUMAN	PCYT2	Ethanolamine-phosphate cytidylyltransferase	133551	121729	129527	78123.2	103584	81179.8
Q99459	Q99459	CDC5L_HUMAN	CDC5L	Cell division cycle 5-like protein	32927.9	32966.2	45065	65813.7	41279.9	52356.5
Q99460;Q99460-2	Q99460;Q99460-2	PSMD1_HUMAN	PSMD1	26S proteasome non-ATPase regulatory subunit 1	201576	201571	227355	155180	168879	150296
Q99470	Q99470	SDF2_HUMAN	SDF2	Stromal cell-derived factor 2	88553.1	91175.6	106161	66180.6	130944	53007.8
Q99497	Q99497	PARK7_HUMAN	PARK7	Parkinson disease protein 7	201854	191586	215316	307515	326713	293323
Q99519	Q99519	NEUR1_HUMAN	NEU1	Sialidase-1	87843.4	80421.2	102227	120477	155297	152267
Q99536;Q99536-3	Q99536;Q99536-3	VAT1_HUMAN	VAT1	Synaptic vesicle membrane protein VAT-1 homolog	41347.6	63696.6	64139.4	61141.9	55083.5	56594.3
Q99543;Q99543-2	Q99543;Q99543-2	DNJC2_HUMAN	DNAJC2	DnaJ homolog subfamily C member 2		22840.3		72815.9	57899.8	58071.3
Q99611	Q99611	SPS2_HUMAN	SEPHS2	Selenide, water dikinase 2	45200.3	39733.8	36619.4	29181.6	39696.4	46184.3
Q99615;Q99615-2	Q99615;Q99615-2	DNJC7_HUMAN	DNAJC7	DnaJ homolog subfamily C member 7				54907.7	38073.6	22646.2
Q99623	Q99623;Q99623-2	PHB2_HUMAN	PHB2	Prohibitin-2	140132	154487	161362	135502	121096	146049
Q99714	Q99714;Q99714-2	HCD2_HUMAN	HSD17B10	3-hydroxyacyl-CoA dehydrogenase type-2	608517	593368	721332	304295	364613	197111
Q99729-2;Q99729-3	Q99729;Q99729-2;Q99729-3;Q99729-4	ROAA_HUMAN	HNRNPAB	Isoform 2 of Heterogeneous nuclear ribonucleoprotein A/B	560391	517473	632962	827733	1110000	1210000
Q99733;Q99733-2	Q99733;Q99733-2	NP1L4_HUMAN	NAP1L4	Nucleosome assembly protein 1-like 4	67538.7	57397.6	67410.8	88513.2	129839	83011.1
Q99797	Q99797	MIPEP_HUMAN	MIPEP	Mitochondrial intermediate peptidase	34278.9	44101.2	45848.2	32571.9	50137.2	39791.3
Q99798	Q99798	ACON_HUMAN	ACO2	Aconitate hydratase, mitochondrial	526373	519529	536662	591277	674989	618598
Q99805	Q99805	TM9S2_HUMAN	TM9SF2	Transmembrane 9 superfamily member 2	128842	90039	89530.9	44372.2	41919.9	41533.2
Q99816	Q99816	TS101_HUMAN	TSG101	Tumor susceptibility gene 101 protein				74264.9	52261.9	55051.8
Q99829	Q99829	CPNE1_HUMAN	CPNE1	Copine-1	79710.3	71819	69200.7	24741.7	38890.2	26336
Q99832;Q99832-3	Q99832;Q99832-2;Q99832-3;Q99832-4	TCPH_HUMAN	CCT7	T-complex protein 1 subunit eta	155617	164482	177890	361108	375148	326917
Q99873;Q99873-2;Q99873-3	Q99873;Q99873-3;Q99873-2	ANM1_HUMAN	PRMT1	Protein arginine N-methyltransferase 1	594178	655586	562434	372148	469698	399772
Q99961;Q99961-2;Q99961-3	Q99961;Q99962;Q99961-2;Q99961-3	SH3G1_HUMAN	SH3GL1	Endophilin-A2				40927.3	23038.5
Q9BPW8	Q9BPW8	NIPS1_HUMAN	NIPSNAP1	Protein NipSnap homolog 1	351991	371598	389736	248563	310550	268829
Q9BPX3	Q9BPX3	CND3_HUMAN	NCAPG	Condensin complex subunit 3				37541.2	29862.4	23158.2
Q9BQ04;Q9BWF3;Q9BWF3-4	Q9BQ04;Q9BWF3;Q9BWF3-2;Q9BWF3-3;Q9BWF3-4	RBM4B_HUMAN;RBM4_HUMAN	RBM4;RBM4B	RNA-binding protein 4B	19831.3	23657	20874.3	136658	104203	132408
Q9BQ52;Q9BQ52-4	Q9BQ52;Q9BQ52-3;Q9BQ52-4	RNZ2_HUMAN	ELAC2	Zinc phosphodiesterase ELAC protein 2	26433.4	35330.8	30812.6	39249.4	40428.6	25590.9
Q9BQ67	Q9BQ67	GRWD1_HUMAN	GRWD1	Glutamate-rich WD repeat-containing protein 1	48461	37279.7	65676.2	26965.3	37712.5
Q9BQ70	Q9BQ70	TCF25_HUMAN	TCF25	Ribosome quality control complex subunit TCF25	28730.7	29502	26286	17074.4	17026	19074.6
Q9BQA1	Q9BQA1	MEP50_HUMAN	WDR77	Methylosome protein WDR77	271359	295254	277136	146533	163150	118874
Q9BQP7	Q9BQP7	MGME1_HUMAN	MGME1	Mitochondrial genome maintenance exonuclease 1	27143.1	27739.1	46408.7	52087.6
Q9BR76	Q9BR76	COR1B_HUMAN	CORO1B	Coronin-1B	443322	458066	529423	243905	272137	244787
Q9BRA2	Q9BRA2	TXD17_HUMAN	TXNDC17	Thioredoxin domain-containing protein 17	38460.5	31091.1	41613.2	122271	127889	94947.8
Q9BRJ2	Q9BRJ2	RM45_HUMAN	MRPL45	Large ribosomal subunit protein mL45	20314.3	16362.9	17250.9	11933.9
Q9BRJ6	Q9BRJ6	CG050_HUMAN	C7orf50	Uncharacterized protein C7orf50	68541.3	83109.3	98681.3	117724	143886	124477
Q9BRP4;Q9BRP4-2;Q9BRP4-3	Q9BRP4;Q9BRP4-2;Q9BRP4-3	PAAF1_HUMAN	PAAF1	Proteasomal ATPase-associated factor 1	200900	232971	251328	93467.6	145275	132255
Q9BS26	Q9BS26	ERP44_HUMAN	ERP44	Endoplasmic reticulum resident protein 44	411040	389617	402619	387563	477734	481891
Q9BS40	Q9BS40	LXN_HUMAN	LXN	Latexin	142649	133009	162112	225451	178410	137094
Q9BSH4	Q9BSH4	TACO1_HUMAN	TACO1	Translational activator of cytochrome c oxidase 1	85085.8	115884	99554.9	89022.5	76343	76924
Q9BSH5	Q9BSH5	HDHD3_HUMAN	HDHD3	Haloacid dehalogenase-like hydrolase domain-containing protein 3	49436	57935	48793.7	56473.8	37585.6	38437
Q9BSJ2;Q9BSJ2-4	Q9BSJ2;Q9BSJ2-4	GCP2_HUMAN	TUBGCP2	Gamma-tubulin complex component 2	7825.03	30106.2		67267.3	34619.3
Q9BSJ8;Q9BSJ8-2	Q9BSJ8;Q9BSJ8-2	ESYT1_HUMAN	ESYT1	Extended synaptotagmin-1	2110000	1980000	1820000	3550000	2570000	2380000
Q9BSV6	Q9BSV6	SEN34_HUMAN	TSEN34	tRNA-splicing endonuclease subunit Sen34	62361.5	47131.8	61974.1	32353.8	47324.4	40428.7
Q9BT40;Q9BT40-2	Q9BT40;Q9BT40-2	INP5K_HUMAN	INPP5K	Inositol polyphosphate 5-phosphatase K	25858.1	24742.9	23781.9	11495.8	3189.29
Q9BT78;Q9BT78-2	Q9BT78;Q9BT78-2	CSN4_HUMAN	COPS4	COP9 signalosome complex subunit 4				20294.7	27064.4	24708.1
Q9BTD8;Q9BTD8-2;Q9BTD8-3;Q9BTD8-4	Q9BTD8;Q9BTD8-2;Q9BTD8-3;Q9BTD8-4	RBM42_HUMAN	RBM42	RNA-binding protein 42				37253.8	24263.8	26177
Q9BTE1;Q9BTE1-2;Q9BTE1-3	Q9BTE1;Q9BTE1-2;Q9BTE1-3	DCTN5_HUMAN	DCTN5	Dynactin subunit 5	41716.7	39327.4	38097.4	16415.6	24902.4	28947.7
Q9BTE3;Q9BTE3-2	Q9BTE3;Q9BTE3-2	MCMBP_HUMAN	MCMBP	Mini-chromosome maintenance complex-binding protein	48936.9	46602.7	58230.5	38794.5	43200.3	44630.6
Q9BTT0;Q9BTT0-3	Q9BTT0;Q9BTT0-3	AN32E_HUMAN	ANP32E	Acidic leucine-rich nuclear phosphoprotein 32 family member E	34177.4	37217.3	17816.7	281660	346098	344473
Q9BTW9;Q9BTW9-4;Q9BTW9-5	Q9BTW9;Q9BTW9-4;Q9BTW9-5	TBCD_HUMAN	TBCD	Tubulin-specific chaperone D				32754.9	46249.8	43407.3
Q9BTZ2;Q9BTZ2-4;Q9BTZ2-8	Q9BTZ2;Q9BTZ2-8;P0CG22;Q9BTZ2-4	DHRS4_HUMAN	DHRS4	Dehydrogenase/reductase SDR family member 4	55435.4	77765	59788.7	37361.9	55277.1	32213.5
Q9BUF5	Q9BUF5	TBB6_HUMAN	TUBB6	Tubulin beta-6 chain	386775	332619	360887	370231	224938	270069
Q9BUJ2;Q9BUJ2-2;Q9BUJ2-4	Q9BUJ2;Q9BUJ2-2;Q9BUJ2-3;Q9BUJ2-4	HNRL1_HUMAN	HNRNPUL1	Heterogeneous nuclear ribonucleoprotein U-like protein 1	539660	513926	513636	334041	374393	404406
Q9BUK6;Q9BUK6-2;Q9BUK6-3;Q9BUK6-7	Q9BUK6;Q9BUK6-2;Q9BUK6-3;Q9BUK6-4;Q9BUK6-7	MSTO1_HUMAN	MSTO1	Protein misato homolog 1	24774	21542.5	25351	21443.1	18027.7	14663
Q9BV20;Q9BV20-2	Q9BV20;Q9BV20-2	MTNA_HUMAN	MRI1	Methylthioribose-1-phosphate isomerase	62318.1	69646.7	66903.6	94172.8	91151.5	92791.7
Q9BV36;Q9BV36-2;Q9BV36-3;Q9BV36-4;Q9BV36-5	Q9BV36;Q9BV36-2;Q9BV36-3;Q9BV36-4;Q9BV36-5	MELPH_HUMAN	MLPH	Melanophilin				80602.6	77031.5	70513.9
Q9BV38	Q9BV38	WDR18_HUMAN	WDR18	WD repeat-containing protein 18	118873	117231	109219	71484.6	73311.2	50827.2
Q9BV44	Q9BV44	THUM3_HUMAN	THUMPD3	tRNA (guanine(6)-N2)-methyltransferase THUMP3	27012.4	24861.3	37811.3	39961.8	25496
Q9BV57	Q9BV57;Q9BV57-2	MTND_HUMAN	ADI1	Acireductone dioxygenase				55724.2	40957.8	50958.1
Q9BV79;Q9BV79-2	Q9BV79;Q9BV79-2	MECR_HUMAN	MECR	Enoyl-[acyl-carrier-protein] reductase, mitochondrial				36838.7	35109.4	47106.4
Q9BV86	Q9BV86	NTM1A_HUMAN	NTMT1	N-terminal Xaa-Pro-Lys N-methyltransferase 1				85861.6	91316.9	71534.9
Q9BVA1	Q9BVA1	TBB2B_HUMAN	TUBB2B	Tubulin beta-2B chain	102140	95395.6	76054.2	68366.7	95403.4	86326.1
Q9BVC4;Q9BVC4-4	Q9BVC4;Q9BVC4-4	LST8_HUMAN	MLST8	Target of rapamycin complex subunit LST8	35406.1	33043.8	37654.3
Q9BVK6	Q9BVK6	TMED9_HUMAN	TMED9	Transmembrane emp24 domain-containing protein 9	38337.7	43464.7	50656.4
Q9BVM2	Q9BVM2	DPCD_HUMAN	DPCD	Protein DPCD	46977.1	43273	49855.7	19001.7	17230.6	15266.7
Q9BW27;Q9BW27-2;Q9BW27-3	Q9BW27;Q9BW27-2;Q9BW27-3	NUP85_HUMAN	NUP85	Nuclear pore complex protein Nup85	31507	29386.7		42285	43608.4	43321.7
Q9BW92	Q9BW92	SYTM_HUMAN	TARS2	Threonine--tRNA ligase, mitochondrial	39645.7	36128	56360.8	55560.7	53930.4
Q9BWD1;Q9BWD1-2	Q9BWD1;Q9BWD1-2	THIC_HUMAN	ACAT2	Acetyl-CoA acetyltransferase, cytosolic	76018.8	76909.9	89191.5	54866.5	49229.5	58343.3
Q9BWM7	Q9BWM7	SFXN3_HUMAN	SFXN3	Sideroflexin-3				21180.1
Q9BWS9;Q9BWS9-2;Q9BWS9-3	Q9BWS9;Q9BWS9-2;Q9BWS9-3	CHID1_HUMAN	CHID1	Chitinase domain-containing protein 1	32704	42092.3	28706		48026.7	14665.7
Q9BX40;Q9BX40-2	Q9BX40;Q9BX40-2	LS14B_HUMAN	LSM14B	Protein LSM14 homolog B	32059.2	35841.6		126664	74407.7	86189.6
Q9BXJ9	Q9BXJ9	NAA15_HUMAN	NAA15	N-alpha-acetyltransferase 15, NatA auxiliary subunit	87277.4	80426.6	84290.1	118412	159959	141209
Q9BXP5;Q9BXP5-2;Q9BXP5-3;Q9BXP5-4;Q9BXP5-5	Q9BXP5;Q9BXP5-2;Q9BXP5-3;Q9BXP5-4;Q9BXP5-5	SRRT_HUMAN	SRRT	Serrate RNA effector molecule homolog			14994.8	121915	138949	147404
Q9BXS5;Q9BXS5-2	Q9BXS5;Q9BXS5-2	AP1M1_HUMAN	AP1M1	AP-1 complex subunit mu-1	143811	141369	163506	148815	132363	133554
Q9BXW7;Q9BXW7-2	Q9BXW7;Q9BXW7-2	HDHD5_HUMAN	HDHD5	Haloacid dehalogenase-like hydrolase domain-containing 5	69708.9	64645.5	73334.5	79984.6	68415	65169.1
Q9BY32	Q9BY32;Q9BY32-2;Q9BY32-3	ITPA_HUMAN	ITPA	Inosine triphosphate pyrophosphatase	54533.5		103437	381513	323836	349579
Q9BY42	Q9BY42	RTF2_HUMAN	RTF2	Replication termination factor 2	4289.66			53630.1	58036.8	60170.2
Q9BY44	Q9BY44;Q9BY44-3;Q9BY44-4	EIF2A_HUMAN	EIF2A	Eukaryotic translation initiation factor 2A	23518	11632.5	26723.4	21840.4	28155.5	32262.8
Q9BYC5;Q9BYC5-3	Q9BYC5;Q9BYC5-3	FUT8_HUMAN	FUT8	Alpha-(1,6)-fucosyltransferase	27938.9	22449.3	29360.3
Q9BYD1	Q9BYD1	RM13_HUMAN	MRPL13	Large ribosomal subunit protein uL13m	43007.9	53138.9	55911.2	25532	34761.2	38074.6
Q9BYD3	Q9BYD3;Q9BYD3-2	RM04_HUMAN	MRPL4	Large ribosomal subunit protein uL4m	53711.7	52240.3	47721.1	34143.7	32302.8	29365.6
Q9BYG5	Q9BYG4;Q9BYG5	PAR6B_HUMAN	PARD6B	Partitioning defective 6 homolog beta	46893	48629	68580.9	138220	132115	120375
Q9BYT8	Q9BYT8	NEUL_HUMAN	NLN	Neurolysin, mitochondrial	31078.2	26663.7	17395.4	42893.7	48002.4	57268.4
Q9BZE4;Q9BZE4-2	Q9BZE4;Q9BZE4-2;Q9BZE4-3	GTPB4_HUMAN	GTPBP4	GTP-binding protein 4	56750.6	44118.6	39314.8	65801.1	62579.8	79365.1
Q9BZF9;Q9BZF9-2	Q9BZF9;Q9BZF9-2	UACA_HUMAN	UACA	Uveal autoantigen with coiled-coil domains and ankyrin repeats	49930.9			89471.9	99558.3
Q9BZH6	Q9BZH6	WDR11_HUMAN	WDR11	WD repeat-containing protein 11		154518	99462.1	25398.1
Q9BZK7	O60907;Q9BQ87;Q9BZK7;O60907-2	TBL1R_HUMAN	TBL1XR1	F-box-like/WD repeat-containing protein TBL1XR1	133966	141313	103972	113668	125652	88536.6
Q9BZL6;Q9BZL6-3	Q9BZL6;Q9BZL6-2;Q9BZL6-3	KPCD2_HUMAN	PRKD2	Serine/threonine-protein kinase D2	61914.8	48642.2	33151	38235.9	23982	27149.8
Q9BZX2;Q9BZX2-2	Q9BZX2;Q9BZX2-2	UCK2_HUMAN	UCK2	Uridine-cytidine kinase 2				23534.3	18779.1	18939.7
Q9BZZ5-2	Q9BZZ5-2;Q9BZZ5-5	API5_HUMAN	API5	Isoform 2 of Apoptosis inhibitor 5	46164.9			161051	162465	143857
Q9C0B1	Q9C0B1	FTO_HUMAN	FTO	Alpha-ketoglutarate-dependent dioxygenase FTO	20184.9	30319.5	35198.9	26112.4	28750
Q9C0C9	Q9C0C9	UBE2O_HUMAN	UBE2O	(E3-independent) E2 ubiquitin-conjugating enzyme	46107.4	29576.1	37796.4	51665.8	48671.6	43128.3
Q9C0E2	Q9C0E2	XPO4_HUMAN	XPO4	Exportin-4			6706.53	51443.9	38426.8	33504.9
Q9GZL7	Q9GZL7	WDR12_HUMAN	WDR12	Ribosome biogenesis protein WDR12	114776	109405	99510.8	108996	105788	101477
Q9GZN8;Q9GZN8-2	Q9GZN8;Q9GZN8-2	ADSSP_HUMAN	ADISSP	Adipose-secreted signaling protein	199541	191142	260487	195849	182237	152573
Q9GZS3	Q9GZS3	SKI8_HUMAN	SKIC8	Superkiller complex protein 8	123078	102108	113145	158619	176719	179226
Q9GZT3;Q9GZT3-2	Q9GZT3;Q9GZT3-2	SLIRP_HUMAN	SLIRP	SRA stem-loop-interacting RNA-binding protein, mitochondrial	10933.4	10610.8		68604.9	72848.7	59144.1
Q9GZT8;Q9GZT8-2	Q9GZT8;Q9GZT8-2;Q9GZT8-3	NIF3L_HUMAN	NIF3L1	NIF3-like protein 1	114178	118289	129241	54910.1	62323	49449.8
Q9GZZ1;Q9GZZ1-2	Q9GZZ1;Q9GZZ1-2	NAA50_HUMAN	NAA50	N-alpha-acetyltransferase 50	25340.6	18620.2	18232.1	22783.9	38257.1	33265.7
Q9H074;Q9H074-2;Q9H074-3	Q9H074;Q9H074-2;Q9H074-3	PAIP1_HUMAN	PAIP1	Polyadenylate-binding protein-interacting protein 1		18509.9		48322.9	58842.9	40668.8
Q9H082	Q9H082	RB33B_HUMAN	RAB33B	Ras-related protein Rab-33B				8000000
Q9H0B6	Q9H0B6;Q9NSK0;Q9NSK0-3;Q9NSK0-4	KLC2_HUMAN	KLC2	Kinesin light chain 2	24147.2	23570.2		145225	128432	153093
Q9H0C8	Q9H0C8	ILKAP_HUMAN	ILKAP	Integrin-linked kinase-associated serine/threonine phosphatase 2C	81662.8	70152.9	79851	66414.8	79059.9	76088.3
Q9H0D6;Q9H0D6-2	Q9H0D6;Q9H0D6-2	XRN2_HUMAN	XRN2	5'-3' exoribonuclease 2	186717	173928	185084	135669	127037	117502
Q9H0E2	Q9H0E2	TOLIP_HUMAN	TOLLIP	Toll-interacting protein	109759	87359.7	100871	87231.6	66842.6	61192
Q9H0U4	Q9H0U4	RAB1B_HUMAN	RAB1B	Ras-related protein Rab-1B	86779.8	149805	158853		122718	124928
Q9H1B7	Q9H1B7	I2BPL_HUMAN	IRF2BPL	Probable E3 ubiquitin-protein ligase IRF2BPL				54246		26357.6
Q9H1Y0;Q9H1Y0-2	Q9H1Y0;Q9H1Y0-2	ATG5_HUMAN	ATG5	Autophagy protein 5	32516.6	25059.1	31014.8	39235.1	33163.7	38838.7
Q9H1Z4;Q9H1Z4-2	Q9H1Z4;Q9H1Z4-2	WDR13_HUMAN	WDR13	WD repeat-containing protein 13	25133.7	20544.8	30581.9	5252.24
Q9H267	Q9H267;Q9H267-2	VP33B_HUMAN	VPS33B	Vacuolar protein sorting-associated protein 33B	69272.4	66085.5	68667.7	74612.3	73756.3	69282.3
Q9H2C0	Q9H2C0	GAN_HUMAN	GAN	Gigaxonin	81148.4	55608.6	74430.6	83982.3	54321.5	62740.8
Q9H2H9	Q9H2H9	S38A1_HUMAN	SLC38A1	Sodium-coupled neutral amino acid symporter 1	17980.1			34127.5		41480.3
Q9H2J4	Q9H2J4	PDCL3_HUMAN	PDCL3	Phosducin-like protein 3	187994	171564	224028	297063	310264	386796
Q9H2U1;Q9H2U1-2;Q9H2U1-3	Q9H2U1;Q9H2U1-2;Q9H2U1-3	DHX36_HUMAN	DHX36	ATP-dependent DNA/RNA helicase DHX36	28390.7	23058.4	19806.1	42097.8	47297.9	43167.7
Q9H2U2;Q9H2U2-2	Q9H2U2;Q9H2U2-2;Q9H2U2-3	IPYR2_HUMAN	PPA2	Inorganic pyrophosphatase 2, mitochondrial	142812	150714	129543	168322	197181	198769
Q9H307	Q9H307	PININ_HUMAN	PNN	Pinin	937188	952429	1270000	682635	910714	931576
Q9H3K6	Q9H3K6	BOLA2_HUMAN	BOLA2	BolA-like protein 2	521929	650250	708198	441669	516548	470474
Q9H3P7	Q9H3P7	GCP60_HUMAN	ACBD3	Golgi resident protein GCP60	181858	178489	205326	180085	191892	190857
Q9H3S7	Q9H3S7	PTN23_HUMAN	PTPN23	Tyrosine-protein phosphatase non-receptor type 23		10120.1		26938.1	16580.4
Q9H3U1;Q9H3U1-2	Q9H3U1;Q9H3U1-2	UN45A_HUMAN	UNC45A	Protein unc-45 homolog A	31836.8		22298.3	146115	99796	114092
Q9H488	Q9H488;Q9H488-2	OFUT1_HUMAN	POFUT1	GDP-fucose protein O-fucosyltransferase 1	70558.3	92244	82721.6	40979	38255.1	27332.1
Q9H4A3;Q9H4A3-2;Q9H4A3-4;Q9H4A3-5;Q9H4A3-6;Q9H4A3-7	Q9H4A3;Q9H4A3-2;Q9H4A3-4;Q9H4A3-5;Q9H4A3-6;Q9H4A3-7	WNK1_HUMAN	WNK1	Serine/threonine-protein kinase WNK1	25984.4	28585.4	20198.2	41037	44029.8	23318.1
Q9H4A4	Q9H4A4	AMPB_HUMAN	RNPEP	Aminopeptidase B	508092	430694	464843	258503	313297	253090
Q9H4A6	Q9H4A6	GOLP3_HUMAN	GOLPH3	Golgi phosphoprotein 3	6674.49			45653.2
Q9H4M9	Q9H4M9;Q9NZN3	EHD1_HUMAN	EHD1	EH domain-containing protein 1	112142	95632.2	104945	199098	148831	145722
Q9H5Z6	Q9H5Z6	F124B_HUMAN	FAM124B	Protein FAM124B	19452.2	23632.8	32424.3	31240.6		21669.9
Q9H6S3;Q9H6S3-3	Q9H6S3;Q9H6S3-3	ES8L2_HUMAN	EPS8L2	Epidermal growth factor receptor kinase substrate 8-like protein 2				106552	72240.1	84080.3
Q9H6T3;Q9H6T3-3	Q9H6T3;Q9H6T3-3	RPAP3_HUMAN	RPAP3	RNA polymerase II-associated protein 3				34234.4	43253.9	46097.8
Q9H6U6;Q9H6U6-2;Q9H6U6-3;Q9H6U6-7;Q9H6U6-8	Q9H6U6;Q9H6U6-2;Q9H6U6-3;Q9H6U6-7;Q9H6U6-8	BCAS3_HUMAN	BCAS3	BCAS3 microtubule associated cell migration factor			20484.3	28900.2	13725	18599.3
Q9H6Y2	Q9H6Y2	WDR55_HUMAN	WDR55	WD repeat-containing protein 55	38680.6	43077.3	37314.7	19483.6	25892.8	18363.9
Q9H773	Q9H773	DCTP1_HUMAN	DCTPP1	dCTP pyrophosphatase 1	120845	74995.8	49149	166176	138698	178039
Q9H7D7;Q9H7D7-2	Q9H7D7;Q9H7D7-2	WDR26_HUMAN	WDR26	WD repeat-containing protein 26	18273.7	9490.77	10488.5	50292	47393.9	48759.7
Q9H832;Q9H832-2	Q9H832;Q9H832-2	UBE2Z_HUMAN	UBE2Z	Ubiquitin-conjugating enzyme E2 Z	198461	132503	192018	278885	175830	224379
Q9H853	Q9H853	TBA4B_HUMAN	TUBA4B	Putative tubulin-like protein alpha-4B		6440000	6890000	9680000	6820000	6830000
Q9H857-2;Q9H857-3	Q9H857-2;Q9H857-3	NT5D2_HUMAN	NT5DC2	Isoform 2 of 5'-nucleotidase domain-containing protein 2	37291.2	37391.1	34121.1	32189.8	29348.3	17097.4
Q9H8W4	Q9H8W4	PKHF2_HUMAN	PLEKHF2	Pleckstrin homology domain-containing family F member 2				61101.8	34546.6	30965.1
Q9H993	Q9H993	ARMT1_HUMAN	ARMT1	Damage-control phosphatase ARMT1	1140000	1120000	1210000	562755	755967	564936
Q9H9A6	Q9H9A6	LRC40_HUMAN	LRRC40	Leucine-rich repeat-containing protein 40		9308.71		17837.6	20264.2	9690.21
Q9H9B4	Q9H9B4	SFXN1_HUMAN	SFXN1	Sideroflexin-1	20190.1	14959.8		34364.7	18115.5
Q9H9C1;Q9H9C1-2	Q9H9C1;Q9H9C1-2	SPE39_HUMAN	VIPAS39	Spermatogenesis-defective protein 39 homolog	41804.5	35656.2	36293.1	45003.8	52924.4	34601.9
Q9H9E3;Q9H9E3-3	Q9H9E3;Q9H9E3-2;Q9H9E3-3	COG4_HUMAN	COG4	Conserved oligomeric Golgi complex subunit 4	16918.2	8991.68		63675	35716.3	40357.5
Q9H9J4;Q9H9J4-2	Q9H9J4;Q9H9J4-2	UBP42_HUMAN	USP42	Ubiquitin carboxyl-terminal hydrolase 42	75141.5	77612.9	97249.2
Q9H9T3;Q9H9T3-2;Q9H9T3-4;Q9H9T3-5	Q9H9T3;Q9H9T3-2;Q9H9T3-4;Q9H9T3-5	ELP3_HUMAN	ELP3	Elongator complex protein 3	54437.8	46044.3	45190.2	31594.4	30799.2	44115.2
Q9HA64	Q9HA64	KT3K_HUMAN	FN3KRP	Ketosamine-3-kinase	68960.1	66554	63995.4	29389.2	45520.2	31577
Q9HAB8	Q9HAB8	PPCS_HUMAN	PPCS	Phosphopantothenate--cysteine ligase	115823	103503	89260.9	58645.9	71068.1	46138.7
Q9HAU5	Q9HAU5	RENT2_HUMAN	UPF2	Regulator of nonsense transcripts 2				55568.6	37510.3	54152
Q9HB07	Q9HB07	MYG1_HUMAN	MYG1	MYG1 exonuclease	210294	201012	225124	270906	283216	299454
Q9HB40;Q9HB40-2	Q9HB40;Q9HB40-2	RISC_HUMAN	SCPEP1	Retinoid-inducible serine carboxypeptidase	30146.9	41107	48993.5	88991.5	91974.7	84217
Q9HB71	Q9HB71;Q9HB71-3	CYBP_HUMAN	CACYBP	Calcyclin-binding protein	379317	374739	440806	294182	268939	213561
Q9HB90;Q9NQL2;Q9NQL2-2	Q9HB90;Q9NQL2;Q9NQL2-2	RRAGC_HUMAN;RRAGD_HUMAN	RRAGC;RRAGD	Ras-related GTP-binding protein C	36423.1	30090	21971	22505	21029
Q9HBL8	Q9HBL8	NMRL1_HUMAN	NMRAL1	NmrA-like family domain-containing protein 1	10228.2	15241.1	21962.8	16382.5	13454.8	14887.3
Q9HBM1	Q9HBM1	SPC25_HUMAN	SPC25	Kinetochore protein Spc25				53482.9		50839.9
Q9HC35;Q9HC35-2	Q9HC35;Q9HC35-2	EMAL4_HUMAN	EML4	Echinoderm microtubule-associated protein-like 4	53175.9	46313.1	38326.1	52574.4	61485.4	68338
Q9HC38;Q9HC38-2	Q9HC38;Q9HC38-2	GLOD4_HUMAN	GLOD4	Glyoxalase domain-containing protein 4	42309.8	45344.9	39562	44002.9	40471.8	40950.2
Q9HCC0;Q9HCC0-2	Q9HCC0;Q9HCC0-2	MCCB_HUMAN	MCCC2	Methylcrotonoyl-CoA carboxylase beta chain, mitochondrial	199597	196172	230203	118755	136745	133843
Q9HCD6;Q9HCD6-2	Q9HCD6;Q9HCD6-2	TANC2_HUMAN	TANC2	Protein TANC2	18590.8		12564.7	23621.1		22928.4
Q9HCE1	Q9HCE1;Q9HCE1-2	MOV10_HUMAN	MOV10	Helicase MOV-10	22555.1		26303.3	29441.6	28578.4	31433.9
Q9HCN8	Q9HCN8	SDF2L_HUMAN	SDF2L1	Stromal cell-derived factor 2-like protein 1	72509.4	105870	104429	104893	141420	86208.6
Q9HCU5	Q9HCU5	PREB_HUMAN	PREB	Prolactin regulatory element-binding protein	46075.7	57914.1	75365.2
Q9HD26;Q9HD26-2	Q9HD26;Q9HD26-2	GOPC_HUMAN	GOPC	Golgi-associated PDZ and coiled-coil motif-containing protein	62464.8	76429.3	51674.9	79082.6	88563.6	81053.4
Q9HD33;Q9HD33-2;Q9HD33-3	Q9HD33;Q9HD33-2;Q9HD33-3	RM47_HUMAN	MRPL47	Large ribosomal subunit protein uL29m	43449.9	33925.3	33695.4	15557.6	20250.6	17630.9
Q9HD45	Q9HD45	TM9S3_HUMAN	TM9SF3	Transmembrane 9 superfamily member 3	174405	149894	139467	108512	121116	97708.8
Q9NP72	Q9NP72;Q9NP72-2	RAB18_HUMAN	RAB18	Ras-related protein Rab-18	118520	113964	117759	87864.3	90304.3	72368.8
Q9NP77	Q9NP77	SSU72_HUMAN	SSU72	RNA polymerase II subunit A C-terminal domain phosphatase SSU72					38169.7	52444.6
Q9NP81	Q9NP81;Q9NP81-2	SYSM_HUMAN	SARS2	Serine--tRNA ligase, mitochondrial	69495.5	61675.7	65802.1	59504.5	77163.7	61557.5
Q9NP85;Q9NP85-2	Q9NP85;Q9NP85-2	PODO_HUMAN	NPHS2	Podocin	74511.3	88901.2	82298.4	56367.8	62761.4	45321.9
Q9NPD3	Q9NPD3	EXOS4_HUMAN	EXOSC4	Exosome complex component RRP41	90920.2	92849.1	86650.7	88713.1	87362.7	63296.8
Q9NPF4	Q9NPF4	OSGEP_HUMAN	OSGEP	tRNA N6-adenosine threonylcarbamoyltransferase	27951.3	18322	20775.8
Q9NPH2;Q9NPH2-2;Q9NPH2-3	Q9NPH2;Q9NPH2-2;Q9NPH2-3	INO1_HUMAN	ISYNA1	Inositol-3-phosphate synthase 1	13190.1	16705.8	7334.11	24851.1	28354.3	18259.7
Q9NPJ3;Q9NPJ3-2	Q9NPJ3;Q9NPJ3-2	ACO13_HUMAN	ACOT13	Acyl-coenzyme A thioesterase 13	9409.43	15325.5	14485.2
Q9NPQ8;Q9NPQ8-2;Q9NPQ8-3;Q9NPQ8-4	Q9NPQ8;Q9NPQ8-4;Q9NPQ8-2;Q9NPQ8-3	RIC8A_HUMAN	RIC8A	Synembryn-A	9687.69	15210.3		90940.1	46343.1	53750.9
Q9NQ88	Q9NQ88	TIGAR_HUMAN	TIGAR	Fructose-2,6-bisphosphatase TIGAR	4723.52	21321.1	8500.84	30490.5	27677.1	13176.7
Q9NQC3;Q9NQC3-2;Q9NQC3-3;Q9NQC3-4;Q9NQC3-5;Q9NQC3-6	Q9NQC3;Q9NQC3-2;Q9NQC3-3;Q9NQC3-4;Q9NQC3-5;Q9NQC3-6	RTN4_HUMAN	RTN4	Reticulon-4	18206.3			100186	62474.4	70587.1
Q9NQC7;Q9NQC7-2	Q9NQC7;Q9NQC7-2	CYLD_HUMAN	CYLD	Ubiquitin carboxyl-terminal hydrolase CYLD	123381	85221.3	60905.2
Q9NQG5	Q9NQG5	RPR1B_HUMAN	RPRD1B	Regulation of nuclear pre-mRNA domain-containing protein 1B				56429.6	30400.5	43816.8
Q9NQR4	Q9NQR4	NIT2_HUMAN	NIT2	Omega-amidase NIT2	127561	140696	142184	58791.1	66800.6	62785
Q9NQW7;Q9NQW7-2;Q9NQW7-3;Q9NQW7-4	Q9NQW7;Q9NQW7-3;Q9NQW7-2;Q9NQW7-4	XPP1_HUMAN	XPNPEP1	Xaa-Pro aminopeptidase 1	54652.9	53316	70167.9	126215	160839	151847
Q9NR09	Q9NR09	BIRC6_HUMAN	BIRC6	Baculoviral IAP repeat-containing protein 6	1030000	1070000	1220000	1370000	1110000	1600000
Q9NR28;Q9NR28-2;Q9NR28-3	Q9NR28;Q9NR28-2;Q9NR28-3	DBLOH_HUMAN	DIABLO	Diablo IAP-binding mitochondrial protein	18716.8		13511	13954.1	8150.3	8848.86
Q9NR45	Q9NR45	SIAS_HUMAN	NANS	Sialic acid synthase	513231	487402	471658	339276	423806	221530
Q9NR46	Q9NR46;Q9NR46-2	SHLB2_HUMAN	SH3GLB2	Endophilin-B2	16050.3	11255.1	15788	349323	248927	271675
Q9NR50;Q9NR50-2;Q9NR50-3	Q9NR50;Q9NR50-2;Q9NR50-3	EI2BG_HUMAN	EIF2B3	Translation initiation factor eIF-2B subunit gamma	57228	63418.3	61921.7	80857.8	89319.6	83792.3
Q9NR56	Q5VZF2;Q9NR56;Q5VZF2-2;Q5VZF2-3;Q9NR56-2;Q9NR56-3;Q9NR56-4;Q9NR56-5;Q9NR56-6;Q9NR56-7	MBNL1_HUMAN	MBNL1	Muscleblind-like protein 1				100519	78505.5	137795
Q9NRF8	Q9NRF8	PYRG2_HUMAN	CTPS2	CTP synthase 2	40057.5	41067.2	35392.6	28834.1	31972.6	30569.5
Q9NRH3	P23258;Q9NRH3	TBG2_HUMAN	TUBG2	Tubulin gamma-2 chain	152641	155115	159798	110246	103808	101662
Q9NRL3;Q9NRL3-3	Q9NRL3;Q9NRL3-3	STRN4_HUMAN	STRN4	Striatin-4	36361	32826.9	34177.2	31166.1	35087.1
Q9NRN5;Q9NRN5-2	Q9NRN5;Q9NRN5-2	OLFL3_HUMAN	OLFML3	Olfactomedin-like protein 3	24884.3	20685.2	25875.4	36502.4	46158.6	46142.6
Q9NRN7	Q9NRN7;Q9NRN7-2	ADPPT_HUMAN	AASDHPPT	L-aminoadipate-semialdehyde dehydrogenase-phosphopantetheinyl transferase	73331.7	58405.4	62489.3	70656.6	59831.1	72720.6
Q9NRV9	Q9NRV9	HEBP1_HUMAN	HEBP1	Heme-binding protein 1	17064.3	10454.1			23514	16330.5
Q9NRW7	Q9NRW7	VPS45_HUMAN	VPS45	Vacuolar protein sorting-associated protein 45	44313.7	41144	44431.4	66997.5	64151.9	36759.9
Q9NRX4	Q9NRX4;Q9NRX4-2	PHP14_HUMAN	PHPT1	14 kDa phosphohistidine phosphatase	81029.1	74912.4	89408.5	204485	198688	224621
Q9NRY4	Q9NRY4	RHG35_HUMAN	ARHGAP35	Rho GTPase-activating protein 35			5725.24	29284.4	27896.2	29121
Q9NSD9	Q9NSD9;Q9NSD9-2	SYFB_HUMAN	FARSB	Phenylalanine--tRNA ligase beta subunit	210935	208295	205094	104590	123045	81948.9
Q9NSE4	Q9NSE4	SYIM_HUMAN	IARS2	Isoleucine--tRNA ligase, mitochondrial	56129	55394.2	59862.3	46205.8	50887.1	39092.5
Q9NT62;Q9NT62-2	Q9NT62;Q9NT62-2	ATG3_HUMAN	ATG3	Ubiquitin-like-conjugating enzyme ATG3	18136.8		12602.2	140447	106167	114980
Q9NTJ3	Q9NTJ3;Q9NTJ3-2	SMC4_HUMAN	SMC4	Structural maintenance of chromosomes protein 4	32111	28853	25903.8	70982.2	50511.9	48658.5
Q9NTJ4;Q9NTJ4-2;Q9NTJ4-3;Q9NTJ4-4	Q9NTJ4;Q9NTJ4-2;Q9NTJ4-3;Q9NTJ4-4	MA2C1_HUMAN	MAN2C1	Alpha-mannosidase 2C1	31246.1	35976.5	31264.2	18359.9	39960	44070.4
Q9NTK5	Q9NTK5;Q9NTK5-2;Q9NTK5-3	OLA1_HUMAN	OLA1	Obg-like ATPase 1	68116.6	70098	84940.7	149272	191185	177136
Q9NTZ6	Q9NTZ6	RBM12_HUMAN	RBM12	RNA-binding protein 12	32830.9	47373.3	30772.1	200228	182027	230636
Q9NUJ1	Q9NUJ1;Q9NUJ1-3	ABHDA_HUMAN	ABHD10	Palmitoyl-protein thioesterase ABHD10, mitochondrial	26237.6		19155
Q9NUL3;Q9NUL3-2;Q9NUL3-3;Q9NUL3-4;Q9NUL3-6;Q9NUL3-7;Q9NUL3-8	Q9NUL3;Q9NUL3-2;Q9NUL3-3;Q9NUL3-4;Q9NUL3-6;Q9NUL3-7;Q9NUL3-8	STAU2_HUMAN	STAU2	Double-stranded RNA-binding protein Staufen homolog 2	12042.1	18907.5	22063.3
Q9NUQ8;Q9NUQ8-2	Q9NUQ8;Q9NUQ8-2	ABCF3_HUMAN	ABCF3	ATP-binding cassette sub-family F member 3	44979	34083.8	44206.8	72092.7	50223	75990.1
Q9NUQ9	Q9NUQ9;Q9NUQ9-2	CYRIB_HUMAN	CYRIB	CYFIP-related Rac1 interactor B	35725.6	38657.1	29965.3	196526	163953	172463
Q9NUU7;Q9UMR2;Q9UMR2-2;Q9UMR2-4	Q9NUU7;Q9UMR2;Q9NUU7-2;Q9UMR2-2;Q9UMR2-3;Q9UMR2-4	DD19A_HUMAN;DD19B_HUMAN	DDX19A;DDX19B	ATP-dependent RNA helicase DDX19A	136369	134311	149957	241442	182191	197466
Q9NUY8;Q9NUY8-2	Q9NUY8;Q9NUY8-2	TBC23_HUMAN	TBC1D23	TBC1 domain family member 23	24564.1	10290.2		56013.2	42804	19597.4
Q9NVA2;Q9NVA2-2	Q9NVA2;Q9NVA2-2	SEP11_HUMAN	SEPTIN11	Septin-11	68394.9	73743.5	71392	65922.7	76434	40988.5
Q9NVE5;Q9NVE5-3	Q9NVE5;Q9NVE5-3	UBP40_HUMAN	USP40	Ubiquitin carboxyl-terminal hydrolase 40	391550	404258	442841	648074	382084	579594
Q9NVJ2	Q96BM9;Q9NVJ2	ARL8B_HUMAN	ARL8B	ADP-ribosylation factor-like protein 8B	170078	157106	166577	111491	113896	98927.9
Q9NVM4;Q9NVM4-2;Q9NVM4-3;Q9NVM4-4	Q9NVM4;Q9NVM4-2;Q9NVM4-3;Q9NVM4-4	ANM7_HUMAN	PRMT7	Protein arginine N-methyltransferase 7	19443	32577.1	36487.2	29409.5	32754.3	21506.4
Q9NVP2	Q9NVP2	ASF1B_HUMAN	ASF1B	Histone chaperone ASF1B	57995.4	45159.8	36813.9	101932	86413.7	70998.2
Q9NVS9;Q9NVS9-3	Q9NVS9;Q9NVS9-3	PNPO_HUMAN	PNPO	Pyridoxine-5'-phosphate oxidase	179539	184075	175030	125800	128782	112967
Q9NVX2	Q9NVX2	NLE1_HUMAN	NLE1	Notchless protein homolog 1	87138.5	117112		128984	209482	180436
Q9NVX7;Q9NVX7-2	Q9NVX7;Q9NVX7-2	KBTB4_HUMAN	KBTBD4	Kelch repeat and BTB domain-containing protein 4	61331.6	57976.8	60458.6	59723.4	41490.1
Q9NVZ3;Q9NVZ3-2;Q9NVZ3-3;Q9NVZ3-4	Q9NVZ3;Q9NVZ3-2;Q9NVZ3-3;Q9NVZ3-4	NECP2_HUMAN	NECAP2	Adaptin ear-binding coat-associated protein 2	32235.2	28056.4	26723.4	67966.9	73697.2	74910.7
Q9NWH9	Q9NWH9	SLTM_HUMAN	SLTM	SAFB-like transcription modulator		54455.4	42122.6	66484.3	69097.5	63543.2
Q9NWT6	Q9NWT6	HIF1N_HUMAN	HIF1AN	Hypoxia-inducible factor 1-alpha inhibitor	29537.1	32203.2	18579.7	20777.5	39222.2
Q9NX46	Q9NX46	ADPRS_HUMAN	ADPRS	ADP-ribosylhydrolase ARH3	41008.7	39705.4	39472.7	26626.7	33903.1	17967.3
Q9NXG2	Q9NXG2	THUM1_HUMAN	THUMPD1	THUMP domain-containing protein 1	58271	75335.6	66294	75647.4	43515.9	73368.1
Q9NXJ5	Q9NXJ5;Q9NXJ5-2	PGPI_HUMAN	PGPEP1	Pyroglutamyl-peptidase 1	153390	117152	116283	29204.6
Q9NXR7;Q9NXR7-1;Q9NXR7-3;Q9NXR7-4	Q9NXR7;Q9NXR7-1;Q9NXR7-3;Q9NXR7-4	BABA2_HUMAN	BABAM2	BRISC and BRCA1-A complex member 2	113834	108103	118569	121258	133314	122343
Q9NY33;Q9NY33-4	Q9NY33;Q9NY33-2;Q9NY33-4	DPP3_HUMAN	DPP3	Dipeptidyl peptidase 3	280690	273302	271914	305284	332372	323736
Q9NYF8;Q9NYF8-2;Q9NYF8-3;Q9NYF8-4	Q9NYF8;Q9NYF8-2;Q9NYF8-3;Q9NYF8-4	BCLF1_HUMAN	BCLAF1	Bcl-2-associated transcription factor 1	17898.3	20815.7	21210.1	87435.7	94773.4	90733.7
Q9NYK5;Q9NYK5-2	Q9NYK5;Q9NYK5-2	RM39_HUMAN	MRPL39	Large ribosomal subunit protein mL39	125190	131492	129357	37567.7	41629.3	49649.5
Q9NYL9	Q9NYL9	TMOD3_HUMAN	TMOD3	Tropomodulin-3	22617.9	20315.5		75999.5	53498.6	55530
Q9NYU2;Q9NYU2-2	Q9NYU2;Q9NYU2-2	UGGG1_HUMAN	UGGT1	UDP-glucose:glycoprotein glucosyltransferase 1	239910	238450	275464	245106	250591	204752
Q9NZ01	Q9NZ01	TECR_HUMAN	TECR	Very-long-chain enoyl-CoA reductase	82813.3	68636.7	79753	48025.2	43533.3	37069.9
Q9NZ08;Q9NZ08-2	Q9NZ08;Q9NZ08-2	ERAP1_HUMAN	ERAP1	Endoplasmic reticulum aminopeptidase 1	14902.8	16040.5	12680.3	19684.9	18926.7	19838.8
Q9NZB2;Q9NZB2-6	Q9NZB2;Q9NZB2-6	F120A_HUMAN	FAM120A	Constitutive coactivator of PPAR-gamma-like protein 1	131577	134051	102288	142878	169237	217485
Q9NZD8;Q9NZD8-2	Q9NZD8;Q9NZD8-2	SPG21_HUMAN	SPG21	Maspardin	37566.9		22627.8		24395.7	24374.4
Q9NZL9;Q9NZL9-2;Q9NZL9-4	Q9NZL9;Q9NZL9-2;Q9NZL9-4	MAT2B_HUMAN	MAT2B	Methionine adenosyltransferase 2 subunit beta	68959	90086.7	87280.6	105095	118421	129609
Q9NZM1;Q9NZM1-3;Q9NZM1-6	Q9NZM1;Q9NZM1-2;Q9NZM1-3;Q9NZM1-6	MYOF_HUMAN	MYOF	Myoferlin	136993	103308	91837.7	121665	102830	86716.9
Q9NZT1	Q9NZT1	CALL5_HUMAN	CALML5	Calmodulin-like protein 5				114941
Q9NZT2;Q9NZT2-2	Q9NZT2;Q9NZT2-2	OGFR_HUMAN	OGFR	Opioid growth factor receptor	28797.9	31797	35824.4	35025.3	46488.4	29970.7
Q9P015	Q9P015	RM15_HUMAN	MRPL15	Large ribosomal subunit protein uL15m	35331	36512.3	47747.2	18199	23961.5
Q9P035	Q9P035	HACD3_HUMAN	HACD3	Very-long-chain (3R)-3-hydroxyacyl-CoA dehydratase 3	151310	162681	125329	51545	65906.3	44930.6
Q9P0L0;Q9P0L0-2	Q9P0L0;Q9P0L0-2	VAPA_HUMAN	VAPA	Vesicle-associated membrane protein-associated protein A	23788.3	23238.2		220455	195025	185494
Q9P258	Q9P258	RCC2_HUMAN	RCC2	Protein RCC2	513987	447582	389903	242983	271847	242330
Q9P265	Q9P265	DIP2B_HUMAN	DIP2B	Disco-interacting protein 2 homolog B	40527.8	20977.4	22324	22255.1	18069.9	22081.6
Q9P289;Q9P289-2	Q9P289;Q9Y6E0;Q9P289-2;Q9P289-3;Q9Y6E0-2	STK26_HUMAN	STK26	Serine/threonine-protein kinase 26	21035.3	16675.1		98890.4	78021.4	65837.5
Q9P2E9	Q9P2E9;Q9P2E9-3	RRBP1_HUMAN	RRBP1	Ribosome-binding protein 1	268444	298401	235067	180167	200375	308138
Q9P2H5	Q9P2H5;Q9P2H5-2	UBP35_HUMAN	USP35	Ubiquitin carboxyl-terminal hydrolase 35	89771.5	70565.4	94426.3		109818	148370
Q9P2J5	Q9P2J5;Q9P2J5-2	SYLC_HUMAN	LARS1	Leucine--tRNA ligase, cytoplasmic	120473	141778	127573	177189	198710	206565
Q9P2K5;Q9P2K5-2	Q9P2K5;Q9P2K5-2	MYEF2_HUMAN	MYEF2	Myelin expression factor 2	20145.3	14287.1	17846.3	118227	139242	154394
Q9P2M7;Q9P2M7-2	Q9P2M7;Q9P2M7-2	CING_HUMAN	CGN	Cingulin				27895.8	23514.6	18243.9
Q9P2P5	Q9P2P5	HECW2_HUMAN	HECW2	E3 ubiquitin-protein ligase HECW2	73470.4	45432.6	32487.2
Q9P2R3-2	Q9P2R3-2	ANFY1_HUMAN	ANKFY1	Isoform 2 of Rabankyrin-5	29025.1	29299.4	35993.6
Q9P2R3;Q9P2R3-4	Q9P2R3;Q9P2R3-2;Q9P2R3-4	ANFY1_HUMAN	ANKFY1	Rabankyrin-5	2520000	2880000	3230000	467918	880256	988372
Q9P2R7;Q9P2R7-2	Q9P2R7;Q9P2R7-2	SUCB1_HUMAN	SUCLA2	Succinate--CoA ligase [ADP-forming] subunit beta, mitochondrial	98400.8	111610	104386	116391	111506	84615.9
Q9P2T1;Q9P2T1-2;Q9P2T1-3	Q9P2T1;Q9P2T1-2;Q9P2T1-3	GMPR2_HUMAN	GMPR2	GMP reductase 2	111087	115751	116227	49120.4	68631.6	54545.2
Q9UBB4;Q9UBB4-2	Q9UBB4;Q9UBB4-2	ATX10_HUMAN	ATXN10	Ataxin-10				23448.7	12325	22251.4
Q9UBC2;Q9UBC2-2;Q9UBC2-3;Q9UBC2-4	Q9UBC2;Q9UBC2-2;Q9UBC2-3;Q9UBC2-4	EP15R_HUMAN	EPS15L1	Epidermal growth factor receptor substrate 15-like 1	23288.8	9327.33	23781.8
Q9UBE0;Q9UBE0-2;Q9UBE0-3	Q9UBE0;Q9UBE0-2;Q9UBE0-3	SAE1_HUMAN	SAE1	SUMO-activating enzyme subunit 1	41562.1	42455.7	33734.3	42239.7	36531.2	38399.1
Q9UBF2;Q9UBF2-2	Q9UBF2;Q9UBF2-2	COPG2_HUMAN	COPG2	Coatomer subunit gamma-2	88615.8	89481.4	246548	175415	152645	141603
Q9UBL3;Q9UBL3-2;Q9UBL3-3	Q9UBL3;Q9UBL3-3;Q9UBL3-2	ASH2L_HUMAN	ASH2L	Set1/Ash2 histone methyltransferase complex subunit ASH2	26271.5	23453.9	28873.5	46986.9	61542.7	42211.6
Q9UBQ0;Q9UBQ0-2	Q9UBQ0;Q9UBQ0-2	VPS29_HUMAN	VPS29	Vacuolar protein sorting-associated protein 29	396818	426721	451973	314887	426247	354798
Q9UBQ5;Q9UBQ5-2	Q9UBQ5;Q9UBQ5-2	EIF3K_HUMAN	EIF3K	Eukaryotic translation initiation factor 3 subunit K	95481.1	101870	98580.6	133910	119490	128581
Q9UBQ7	Q9UBQ7	GRHPR_HUMAN	GRHPR	Glyoxylate reductase/hydroxypyruvate reductase	25878.4	21357.1	30028	75829	77396.3	77609
Q9UBR2	Q9UBR2	CATZ_HUMAN	CTSZ	Cathepsin Z	35961.4	35779.6	45259.6	91221.4	116732	110703
Q9UBS4	Q9UBS4	DJB11_HUMAN	DNAJB11	DnaJ homolog subfamily B member 11	1350000	1260000	1770000	3180000	2990000	2400000
Q9UBT2	Q9UBT2;Q9UBT2-2	SAE2_HUMAN	UBA2	SUMO-activating enzyme subunit 2	80448.3	74868.8	73562	69782.5	82968.5	72256.3
Q9UBU9	Q9UBU9	NXF1_HUMAN	NXF1	Nuclear RNA export factor 1	22534.3	22859.7	16305.1			19581.3
Q9UBV8	Q9UBV8	PEF1_HUMAN	PEF1	Peflin	7711.86			56691	54289.1	61371.4
Q9UEW8;Q9UEW8-2	Q9UEW8;Q9UEW8-2	STK39_HUMAN	STK39	STE20/SPS1-related proline-alanine-rich protein kinase	3932.97	23643.4		56330.8	35105.6	23777.4
Q9UFN0	Q9UFN0;Q9BS92	NPS3A_HUMAN	NIPSNAP3A	Protein NipSnap homolog 3A	74180	77930.2	80849.4	34405	62674	50203.2
Q9UG63;Q9UG63-2	Q9UG63;Q9UG63-2	ABCF2_HUMAN	ABCF2	ATP-binding cassette sub-family F member 2	19299.4	12408.5	22890.4	27976.1	17781.8	24721.6
Q9UGI8;Q9UGI8-2	Q9UGI8;Q9UGI8-2	TES_HUMAN	TES	Testin	60710.1	52224.4	46631.9	74362.3	72072.9	48663.2
Q9UGV2;Q9UGV2-2;Q9UGV2-3	Q9UGV2;Q9UGV2-2;Q9UGV2-3	NDRG3_HUMAN	NDRG3	Protein NDRG3				30322	15217.8	12271.3
Q9UHB9;Q9UHB9-2;Q9UHB9-4	Q9UHB9;Q9UHB9-2;Q9UHB9-3;Q9UHB9-4	SRP68_HUMAN	SRP68	Signal recognition particle subunit SRP68	17789.4	14703.6	12527.8	29727.6	29483.8	34373.9
Q9UHD1;Q9UHD1-2	Q9UHD1;Q9UHD1-2	CHRD1_HUMAN	CHORDC1	Cysteine and histidine-rich domain-containing protein 1	110511	109234	95490.4	60579.4	68674.6	51345.9
Q9UHD8;Q9UHD8-2;Q9UHD8-5;Q9UHD8-7	Q9UHD8;Q9UHD8-2;Q9UHD8-3;Q9UHD8-4;Q9UHD8-5;Q9UHD8-7;Q9UHD8-8;Q9UHD8-9	SEPT9_HUMAN	SEPTIN9	Septin-9	89775.4	89773.5	92577.8	189426	143518	111292
Q9UHI6	Q9UHI6	DDX20_HUMAN	DDX20	Probable ATP-dependent RNA helicase DDX20	35812.6	26880.2	18559.1	21352.5	15622.9	5417.61
Q9UHJ6	Q9UHJ6	SHPK_HUMAN	SHPK	Sedoheptulokinase	110872	110646	116283	62731.6	98108	66453.8
Q9UHL4	Q9UHL4	DPP2_HUMAN	DPP7	Dipeptidyl peptidase 2	84824.5	47930.6	49954.2		37990.6	43407.1
Q9UHP3;Q9UHP3-1;Q9UHP3-3	Q9UHP3;Q9UHP3-1;Q9UHP3-3	UBP25_HUMAN	USP25	Ubiquitin carboxyl-terminal hydrolase 25	1060000	713864	592801	240638	280088	251090
Q9UHQ9	Q9UHQ9	NB5R1_HUMAN	CYB5R1	NADH-cytochrome b5 reductase 1	16348	15652.2	20751.6		10676.6
Q9UHX1;Q9UHX1-2;Q9UHX1-3;Q9UHX1-4;Q9UHX1-5;Q9UHX1-6	Q9UHX1;Q9UHX1-2;Q9UHX1-5;Q9UHX1-6;Q9UHX1-3;Q9UHX1-4	PUF60_HUMAN	PUF60	Poly(U)-binding-splicing factor PUF60	71639.8	73026	73013.3	185694	160180	176883
Q9UHY1	Q9UHY1	NRBP_HUMAN	NRBP1	Nuclear receptor-binding protein	113866	125477	115779	123218	97502.5	81256.6
Q9UHY7	Q9UHY7;Q9UHY7-2	ENOPH_HUMAN	ENOPH1	Enolase-phosphatase E1	18305.7		26231.3	102459	109723	76130.5
Q9UI12;Q9UI12-2	Q9UI12;Q9UI12-2	VATH_HUMAN	ATP6V1H	V-type proton ATPase subunit H		31292.4		55854.5	44554.1	54967.3
Q9UI26;Q9UI26-2	Q9UI26;Q9UI26-2	IPO11_HUMAN	IPO11	Importin-11			169080	188202	217252	200729
Q9UI30	Q9UI30	TR112_HUMAN	TRMT112	Multifunctional methyltransferase subunit TRM112-like protein	82282.4	80944.1		218159	192707	219577
Q9UIA9	Q9UIA9	XPO7_HUMAN	XPO7	Exportin-7				54582.4	32825.5	56901.5
Q9UIC8;Q9UIC8-2	Q9UIC8;Q9UIC8-2	LCMT1_HUMAN	LCMT1	Leucine carboxyl methyltransferase 1	92302.5	88549	80534.5	58249.6	70201.3	51128.9
Q9UIJ7;Q9UIJ7-3	Q9UIJ7;Q9UIJ7-3	KAD3_HUMAN	AK3	GTP:AMP phosphotransferase AK3, mitochondrial	76323.1	75529.4	87049.7	49168.7	58966.6	44048.1
Q9UJ68;Q9UJ68-2;Q9UJ68-3;Q9UJ68-4;Q9UJ68-5	Q9UJ68;Q9UJ68-5;Q9UJ68-2;Q9UJ68-3;Q9UJ68-4	MSRA_HUMAN	MSRA	Mitochondrial peptide methionine sulfoxide reductase	37963.8	39256.2	36411.5	30234.5	36472.8	25813.7
Q9UJ70;Q9UJ70-2	Q9UJ70;Q9UJ70-2	NAGK_HUMAN	NAGK	N-acetyl-D-glucosamine kinase	15500000	16500000	15600000	11900000	11700000	10200000
Q9UJU6-2	Q9UJU6-2;Q9UJU6-3;Q9UJU6-4;Q9UJU6-6	DBNL_HUMAN	DBNL	Isoform 2 of Drebrin-like protein	40286.3	52194.4	60689.9	205639	200208	209712
Q9UJU6-5	Q9UJU6;Q9UJU6-5	DBNL_HUMAN	DBNL	Isoform 5 of Drebrin-like protein		8971.67	8787.09	114088	98751	102208
Q9UJW0;Q9UJW0-3	Q9UJW0;Q9UJW0-2;Q9UJW0-3	DCTN4_HUMAN	DCTN4	Dynactin subunit 4		33638.3	11017.5		9533.24
Q9UK59	Q9UK59;Q9UK59-2	DBR1_HUMAN	DBR1	Lariat debranching enzyme	36712.7	41120.6	47006.9	31661	38466.8	46657.5
Q9UKD2	Q9UKD2	MRT4_HUMAN	MRTO4	mRNA turnover protein 4 homolog	46899.4	66531.3	56316.3	35605.4	35611.6	31362.9
Q9UKG1	Q9UKG1	DP13A_HUMAN	APPL1	DCC-interacting protein 13-alpha	14932.2	8787.54	11136.4	16864.3
[truncated: 116 more rows]

## Sheet: DIANN_PA_PR619_DUBs
	Protein.Group	Protein.Ids	Protein.Names	Genes	First.Protein.Description	PA DIA 0 [µM] PR619 Rep 1	PA DIA 0 [µM] PR619 Rep 2	PA DIA 0 [µM] PR619 Rep 3	PA DIA 50 [µM] PR619 Rep 1	PA DIA 50 [µM] PR619 Rep 2	PA DIA 50 [µM] PR619 Rep 3
46	Q9UPU5	Q9UPU5	UBP24_HUMAN	USP24	Ubiquitin carboxyl-terminal hydrolase 24	360778	363269	380072	11214.3	15127.6	13663.1
20	Q70CQ2	Q70CQ2;Q70CQ2-2;Q70CQ2-3	UBP34_HUMAN	USP34	Ubiquitin carboxyl-terminal hydrolase 34	313218	315401	334169	NA	73042.4	158532
2	O75317	O75317	UBP12_HUMAN	USP12	Ubiquitin carboxyl-terminal hydrolase 12	138923	135274	147298	NA	NA	NA
21	Q70CQ3	Q70CQ3	UBP30_HUMAN	USP30	Ubiquitin carboxyl-terminal hydrolase 30	158630	172830	175338	NA	NA	NA
42	Q9NVE5;Q9NVE5-3	Q9NVE5;Q9NVE5-3	UBP40_HUMAN	USP40	Ubiquitin carboxyl-terminal hydrolase 40	391550	404258	442841	648074	382084	579594
4	O94966-2	O94966-2;O94966-4	UBP19_HUMAN	USP19	Isoform 2 of Ubiquitin carboxyl-terminal hydrolase 19	22299.5	20263.7	NA	NA	NA	NA
18	Q5VV17	Q5VV17	OTUD1_HUMAN	OTUD1	OTU domain-containing protein 1	11600000	11700000	13100000	4090000	5450000	5250000
47	Q9Y2K6	Q9Y2K6	UBP20_HUMAN	USP20	Ubiquitin carboxyl-terminal hydrolase 20	127635	146228	132894	NA	NA	NA
17	Q5T2D3	Q5T2D3	OTUD3_HUMAN	OTUD3	OTU domain-containing protein 3	25512.6	26631.5	29662.3	NA	NA	NA
10	P51784	P51784	UBP11_HUMAN	USP11	Ubiquitin carboxyl-terminal hydrolase 11	578488	554638	649594	21696.6	31921.7	22003.7
25	Q8NB14	Q8NB14;Q8NB14-2	UBP38_HUMAN	USP38	Ubiquitin carboxyl-terminal hydrolase 38	233844	247836	275447	NA	NA	NA
50	Q9Y5K5;Q9Y5K5-2;Q9Y5K5-3;Q9Y5K5-4	Q9Y5K5;Q9Y5K5-2;Q9Y5K5-3;Q9Y5K5-4	UCHL5_HUMAN	UCHL5	Ubiquitin carboxyl-terminal hydrolase isozyme L5	9700000	8710000	8070000	163129	147873	125007
38	Q96K76-4	Q96K76;Q96K76-2;Q96K76-4	UBP47_HUMAN	USP47	Isoform 4 of Ubiquitin carboxyl-terminal hydrolase 47	2390000	2500000	2880000	111715	131891	121036
33	Q96DC9	Q96DC9	OTUB2_HUMAN	OTUB2	Ubiquitin thioesterase OTUB2	206330	237011	252743	NA	NA	NA
5	O94966-5	O94966;O94966-2;O94966-3;O94966-4;O94966-5;O94966-6;O94966-7	UBP19_HUMAN	USP19	Isoform 5 of Ubiquitin carboxyl-terminal hydrolase 19	3130000	3250000	3780000	206547	207708	225215
29	Q92560	Q92560	BAP1_HUMAN	BAP1	Ubiquitin carboxyl-terminal hydrolase BAP1	117878	97410.5	99671	NA	45918.3	49174.3
8	P40818	P40818;P40818-2	UBP8_HUMAN	USP8	Ubiquitin carboxyl-terminal hydrolase 8	6600000	6520000	7870000	232378	234752	223511
31	Q93008;Q93008-3	O00507;Q93008;O00507-2;Q93008-3	USP9X_HUMAN	USP9X	Probable ubiquitin carboxyl-terminal hydrolase FAF-X	5590000	5910000	6870000	135958	114476	123092
28	Q8TEY7;Q8TEY7-2;Q8TEY7-3	Q8TEY7;Q8TEY7-2;Q8TEY7-3	UBP33_HUMAN	USP33	Ubiquitin carboxyl-terminal hydrolase 33	101064	105992	123950	NA	NA	NA
37	Q96K76-2	Q96K76-2	UBP47_HUMAN	USP47	Isoform 2 of Ubiquitin carboxyl-terminal hydrolase 47	311718	297534	365447	NA	7240.4	NA
48	Q9Y4E8	Q9Y4E8;Q9Y4E8-2;Q9Y4E8-3;Q9Y4E8-4	UBP15_HUMAN	USP15	Ubiquitin carboxyl-terminal hydrolase 15	9050000	9400000	11100000	1020000	1460000	1290000
39	Q96RU2-2	Q96RU2;Q96RU2-2;Q96RU2-3	UBP28_HUMAN	USP28	Isoform 2 of Ubiquitin carboxyl-terminal hydrolase 28	520318	502553	617924	66335.5	94829.6	89844.9
32	Q93009	Q93009;Q93009-3	UBP7_HUMAN	USP7	Ubiquitin carboxyl-terminal hydrolase 7	9440000	9960000	11800000	608259	791821	760106
19	Q6GQQ9	Q6GQQ9;Q6GQQ9-2	OTU7B_HUMAN	OTUD7B	OTU domain-containing protein 7B	1320000	1330000	1620000	301773	435171	418615
26	Q8NFA0	Q8NFA0	UBP32_HUMAN	USP32	Ubiquitin carboxyl-terminal hydrolase 32	5610000	5520000	6860000	395731	440459	428431
30	Q92995;Q92995-2	Q92995;Q92995-2	UBP13_HUMAN	USP13	Ubiquitin carboxyl-terminal hydrolase 13	34056.5	26318.6	30912	20474.7	17481.1	15428.7
15	Q13107	Q13107;Q13107-2;Q13107-3	UBP4_HUMAN	USP4	Ubiquitin carboxyl-terminal hydrolase 4	4300000	4800000	5590000	119078	78080.2	73461.1
45	Q9UPT9;Q9UPT9-2	Q9UPT9;Q9UPT9-2	UBP22_HUMAN	USP22	Ubiquitin carboxyl-terminal hydrolase 22	120643	106312	92080.6	13389.4	10172.1	7109.73
49	Q9Y4E8-2;Q9Y4E8-3	Q9Y4E8-2;Q9Y4E8-3	UBP15_HUMAN	USP15	Isoform 2 of Ubiquitin carboxyl-terminal hydrolase 15	415026	358495	471993	NA	NA	48916.7
51	Q9Y5T5;Q9Y5T5-2;Q9Y5T5-3	Q9Y5T5;Q9Y5T5-2;Q9Y5T5-3;Q9Y5T5-5	UBP16_HUMAN	USP16	Ubiquitin carboxyl-terminal hydrolase 16	650548	653423	822090	NA	NA	477157
9	P45974;P45974-2	P45974;P45974-2	UBP5_HUMAN	USP5	Ubiquitin carboxyl-terminal hydrolase 5	25200000	25600000	32100000	398656	383475	357698
36	Q96JH7	Q96JH7	VCIP1_HUMAN	VCPIP1	Deubiquitinating protein VCPIP1	1210000	952330	951056	42333.7	34588.4	23893.2
13	P62068;P62068-3;P62068-4	P62068;P62068-2;P62068-3;P62068-4	UBP46_HUMAN	USP46	Ubiquitin carboxyl-terminal hydrolase 46	324980	335492	420269	NA	NA	NA
40	Q9H9J4;Q9H9J4-2	Q9H9J4;Q9H9J4-2	UBP42_HUMAN	USP42	Ubiquitin carboxyl-terminal hydrolase 42	75141.5	77612.9	97249.2	NA	NA	NA
43	Q9P2H5	Q9P2H5;Q9P2H5-2	UBP35_HUMAN	USP35	Ubiquitin carboxyl-terminal hydrolase 35	89771.5	70565.4	94426.3	NA	109818	148370
3	O94782	O94782	UBP1_HUMAN	USP1	Ubiquitin carboxyl-terminal hydrolase 1	126136	144417	172660	NA	NA	NA
1	O00507-2	O00507;O00507-2	USP9Y_HUMAN	USP9Y	Isoform Short of Probable ubiquitin carboxyl-terminal hydrolase FAF-Y	2400000	1650000	2050000	NA	NA	31621
6	P15374	P15374	UCHL3_HUMAN	UCHL3	Ubiquitin carboxyl-terminal hydrolase isozyme L3	2580000	2170000	3180000	75547.5	142120	132637
34	Q96FW1	Q96FW1;Q96FW1-2	OTUB1_HUMAN	OTUB1	Ubiquitin thioesterase OTUB1	32500000	27200000	20800000	1760000	1980000	1720000
14	Q01804	Q01804;Q01804-3;Q01804-5	OTUD4_HUMAN	OTUD4	OTU domain-containing protein 4	202350	135397	119194	72753.8	77246	65497.5
44	Q9UHP3;Q9UHP3-1;Q9UHP3-3	Q9UHP3;Q9UHP3-1;Q9UHP3-3	UBP25_HUMAN	USP25	Ubiquitin carboxyl-terminal hydrolase 25	1060000	713864	592801	240638	280088	251090
12	P54578;P54578-2	P54578;P54578-2;P54578-3	UBP14_HUMAN	USP14	Ubiquitin carboxyl-terminal hydrolase 14	6500000	4200000	3530000	148543	135249	137273
22	Q86UV5	Q86UV5;Q86UV5-2;Q86UV5-3;Q86UV5-5;Q86UV5-8	UBP48_HUMAN	USP48	Ubiquitin carboxyl-terminal hydrolase 48	230610	154594	118448	12168.6	116428	NA
41	Q9NQC7;Q9NQC7-2	Q9NQC7;Q9NQC7-2	CYLD_HUMAN	CYLD	Ubiquitin carboxyl-terminal hydrolase CYLD	123381	85221.3	60905.2	NA	NA	NA
16	Q14694;Q14694-2;Q14694-3	Q14694;Q14694-2;Q14694-3	UBP10_HUMAN	USP10	Ubiquitin carboxyl-terminal hydrolase 10	636056	389136	294389	94441.9	54702.5	62562.2
52	Q9Y6I4	Q9Y6I4;Q9Y6I4-2	UBP3_HUMAN	USP3	Ubiquitin carboxyl-terminal hydrolase 3	453211	252340	198975	17414.4	NA	NA
23	Q86UV5-5	Q86UV5-5	UBP48_HUMAN	USP48	Isoform 5 of Ubiquitin carboxyl-terminal hydrolase 48	30668.2	21079.1	11523.5	NA	NA	NA
35	Q96G74;Q96G74-5	Q96G74;Q96G74-2;Q96G74-4;Q96G74-5	OTUD5_HUMAN	OTUD5	OTU domain-containing protein 5	71263.7	38378.4	30070.3	NA	NA	NA
27	Q8TAC2;Q8TAC2-2	Q8TAC2;Q8TAC2-2	JOS2_HUMAN	JOSD2	Josephin-2	89360.1	53565.4	34145.4	NA	NA	NA
7	P35125-3	P35125;P35125-2;P35125-3	UBP6_HUMAN	USP6	Isoform 3 of Ubiquitin carboxyl-terminal hydrolase 6	248819	262481	550355	NA	NA	64026.3
24	Q8N6M0	Q8N6M0	OTU6B_HUMAN	OTUD6B	Deubiquitinase OTUD6B	1350000	738750	522454	38165.3	26919.3	31738
11	P54252;P54252-1;P54252-4	P54252;P54252-1;P54252-3;P54252-4	ATX3_HUMAN	ATXN3	Ataxin-3	1220000	701310	406652	67042.3	65513.2	37353.1

## Sheet: DIANN_Cocktail_PR619
Protein.Group	Protein.Ids	Protein.Names	Genes	First.Protein.Description	PA/VS/VME DIA 0 [µM] PR619 Rep 1	PA/VS/VME DIA 0 [µM] PR619 Rep 2	PA/VS/VME DIA 0 [µM] PR619 Rep 3	PA/VS/VME DIA 50 [µM] PR619 Rep 1	PA/VS/VME DIA 50 [µM] PR619 Rep 2	PA/VS/VME DIA 50 [µM] PR619 Rep 3
A0A075B6P5;A0A075B6S2;A0A075B6S6;A0A087WW87;A0A0A0MRZ7;A2NJV5;P01614;P01615;P06310	P01615;P01614;P06310;A0A075B6P5;A0A075B6S2;A0A075B6S6;A0A087WW87;A0A0A0MRZ7;A2NJV5	KV228_HUMAN;KV229_HUMAN;KV230_HUMAN;KV240_HUMAN;KVD26_HUMAN;KVD28_HUMAN;KVD29_HUMAN;KVD30_HUMAN;KVD40_HUMAN	IGKV2-28;IGKV2-29;IGKV2-30;IGKV2-40;IGKV2D-26;IGKV2D-28;IGKV2D-29;IGKV2D-30;IGKV2D-40	Immunoglobulin kappa variable 2-28	37752.4	30925.1	23188.1	43501.9	36860	30950.5
A0A0B4J1V1;A0A0B4J1X5;A0A0C4DH32;P01762;P01763;P01780;P01782	P01780;P01762;P01763;P01782;A0A0B4J1V1;A0A0B4J1X5;A0A0C4DH32	HV307_HUMAN;HV309_HUMAN;HV311_HUMAN;HV320_HUMAN;HV321_HUMAN;HV348_HUMAN;HV374_HUMAN	IGHV3-11;IGHV3-20;IGHV3-21;IGHV3-48;IGHV3-7;IGHV3-74;IGHV3-9	Immunoglobulin heavy variable 3-21	56736.5	72184.5	39027.7	87643.6	49505.7	57089.9
A0A0B4J2D5;P0DPI2	A0A0B4J2D5;P0DPI2;A0A0B4J2D5-2;P0DPI2-2	GAL3A_HUMAN;GAL3B_HUMAN	GATD3;GATD3B	Putative glutamine amidotransferase-like class 1 domain-containing protein 3B, mitochondrial	200698	193609	202092	80122.6	77070.2	79024.4
A0A3B3IRV3;Q9ULC4;Q9ULC4-2;Q9ULC4-3	Q9ULC4;A0A3B3IRV3;Q9ULC4-2;Q9ULC4-3	MCTS1_HUMAN;MCTS2_HUMAN	MCTS1;MCTS2	Malignant T-cell-amplified sequence 2	42822	37022.4	34399.8	87550.9	92015.1	109237
A0A3B3IU46;Q9BTL3	Q9BTL3;A0A3B3IU46	RAMAC_HUMAN;RMACL_HUMAN	RAMAC;RAMACL	RNA guanine-N7 methyltransferase-activating subunit-like protein	119031	96961.7	150071	151074	124647	76402.2
A0AV96;A0AV96-2;Q8TBY0;Q8TBY0-2;Q8TBY0-3;Q9NQ94;Q9NQ94-2;Q9NQ94-3;Q9NQ94-4;Q9NQ94-5;Q9NQ94-6	A0AV96;Q9NQ94;Q8TBY0;Q8TBY0-2;Q8TBY0-3;Q9NQ94-2;Q9NQ94-3;Q9NQ94-4;Q9NQ94-5;Q9NQ94-6;A0AV96-2	A1CF_HUMAN;RBM46_HUMAN;RBM47_HUMAN	A1CF;RBM46;RBM47	RNA-binding protein 47	44520.7	30426.7	44757.4	30659.7	38243.5	43190.5
A0AVT1	A0AVT1;A0AVT1-2	UBA6_HUMAN	UBA6	Ubiquitin-like modifier-activating enzyme 6	112192	121686	79579.1	197985	212746	217531
A0FGR8;A0FGR8-6	A0FGR8;A0FGR8-2;A0FGR8-4;A0FGR8-6	ESYT2_HUMAN	ESYT2	Extended synaptotagmin-2	67053.8	69373.9	81791.3	42918.3	49393.8	64981.7
A0PJK1;A0PJK1-2;A0PJK1-4;A0PJK1-5	A0PJK1;A0PJK1-2;A0PJK1-4;A0PJK1-5	SC5AA_HUMAN	SLC5A10	Sodium/mannose cotransporter SLC5A10	97694.2	93849.3	101421	93405.1	90910.9	64953
A4UGR9-8	A4UGR9;A4UGR9-2;A4UGR9-3;A4UGR9-8	XIRP2_HUMAN	XIRP2	Isoform 8 of Xin actin-binding repeat-containing protein 2	107138	95434.3	105813	149957	154468	91320.9
A5YKK6;A5YKK6-2	A5YKK6;A5YKK6-2	CNOT1_HUMAN	CNOT1	CCR4-NOT transcription complex subunit 1			15516.7	29479.1	20513.8	52152.3
A6NHL2;A6NHL2-2	A6NHL2;A6NHL2-2	TBAL3_HUMAN	TUBAL3	Tubulin alpha chain-like 3	60413.1	79053.6	71977.2		56263.9	114627
A6NHX0	A6NHX0	CAST2_HUMAN	CASTOR2	Cytosolic arginine sensor for mTORC1 subunit 2	37899.6	57579.5	48318.2		29888.2	18661.4
A8MWD9;P62308	P62308;A8MWD9	RUXGL_HUMAN;RUXG_HUMAN	SNRPG;SNRPGP15	Putative small nuclear ribonucleoprotein G-like protein 15		99823.1	153108	178070	208335	144708
B5ME19;Q99613;Q99613-2	Q99613;B5ME19;Q99613-2	EIF3C_HUMAN;EIFCL_HUMAN	EIF3C;EIF3CL	Eukaryotic translation initiation factor 3 subunit C-like protein	109513	117786	127585	293338	288493	291867
E9PAV3;E9PAV3-2;Q13765	Q13765;E9PAV3;E9PAV3-2	NACAM_HUMAN;NACA_HUMAN	NACA	Nascent polypeptide-associated complex subunit alpha, muscle-specific form	214139	206050	191152	102236	157054	103778
O00148	O00148;O00148-2;O00148-3	DX39A_HUMAN	DDX39A	ATP-dependent RNA helicase DDX39A	53191.2	25425.5	13701.4	22729.4	38060.3
O00154;O00154-4;O00154-6;O00154-7	O00154;O00154-4;O00154-2;O00154-3;O00154-5;O00154-6;O00154-7	BACH_HUMAN	ACOT7	Cytosolic acyl coenzyme A thioester hydrolase	2443630	2276820	2714430	1548310	1568280	1220830
O00159;O00159-2;O00159-3	O00159;O00159-3;O00159-2	MYO1C_HUMAN	MYO1C	Unconventional myosin-Ic	54686.9	55270.5	49445.4	44866.1
O00170	O00170	AIP_HUMAN	AIP	AH receptor-interacting protein		30587.9	34419.6	111547	107012	201658
O00186	O00186	STXB3_HUMAN	STXBP3	Syntaxin-binding protein 3	63686.9	67891.5	74502	16091.4		33203.6
O00203;O00203-3	O00203;O00203-3	AP3B1_HUMAN	AP3B1	AP-3 complex subunit beta-1	55268.9	75798.2	92009.9	60159.4	80112.4	61928.3
O00204;O00204-2	O00204;O00204-2	ST2B1_HUMAN	SULT2B1	Sulfotransferase 2B1	42343.3	43354.3	38919.9	142987	129550	183906
O00214;O00214-2	O00214;O00214-2	LEG8_HUMAN	LGALS8	Galectin-8	169056	117990	127022	151721	175575
O00231	O00231;O00231-2	PSD11_HUMAN	PSMD11	26S proteasome non-ATPase regulatory subunit 11	40059.9	57362.6	47869.5	243633	274551	291370
O00232	O00232;O00232-2	PSD12_HUMAN	PSMD12	26S proteasome non-ATPase regulatory subunit 12	28795	29505.1	33349.4	134449	179072	166353
O00233;O00233-2	O00233;O00233-2	PSMD9_HUMAN	PSMD9	26S proteasome non-ATPase regulatory subunit 9				51896.4	28231.1	66211.7
O00267;O00267-2	O00267;O00267-2	SPT5H_HUMAN	SUPT5H	Transcription elongation factor SPT5	99477.8	83076.8	88955.5	60093.9	74241.5	63615.2
O00299	O00299	CLIC1_HUMAN	CLIC1	Chloride intracellular channel protein 1	286513	370810	278005	1365500	1304010	1719040
O00303	O00303	EIF3F_HUMAN	EIF3F	Eukaryotic translation initiation factor 3 subunit F	281374	258975	299680	460280	489864	428258
O00401	O00401	WASL_HUMAN	WASL	Actin nucleation-promoting factor WASL				31036.3	34235.5	47610.4
O00410;O00410-3	O00410;O00410-2;O00410-3	IPO5_HUMAN	IPO5	Importin-5	68176.3	71813.3	92693.7	394490	421761	329647
O00418	O00418	EF2K_HUMAN	EEF2K	Eukaryotic elongation factor 2 kinase	20155.1	14013	23573.5	7240.36	6782.38	15187
O00422;O00422-2	O00422;O00422-2	SAP18_HUMAN	SAP18	Histone deacetylase complex subunit SAP18	468571	578365	825257	283748	348530	239858
O00429;O00429-2;O00429-3;O00429-4;O00429-5;O00429-6;O00429-8;O00429-9	O00429;O00429-2;O00429-3;O00429-4;O00429-5;O00429-6;O00429-7;O00429-8;O00429-9	DNM1L_HUMAN	DNM1L	Dynamin-1-like protein	18539.7	23852.2	21605.2	71473.3	72598.7	159434
O00442;O00442-2	O00442;O00442-2	RTCA_HUMAN	RTCA	RNA 3'-terminal phosphate cyclase	40890.8	19613.2		24222.6
O00487	O00487	PSDE_HUMAN	PSMD14	26S proteasome non-ATPase regulatory subunit 14	258590	276603	268124	272972	324027	190459
O00505	O00505	IMA4_HUMAN	KPNA3	Importin subunit alpha-4	41437.5	37319	36005.2	144251	123718	153803
O00507-2	O00507;O00507-2	USP9Y_HUMAN	USP9Y	Isoform Short of Probable ubiquitin carboxyl-terminal hydrolase FAF-Y	22464.5		23877
O00571	O00571;O15523;Q9NQI0;O00571-2;O15523-2;Q9NQI0-2;Q9NQI0-3;Q9NQI0-4	DDX3X_HUMAN	DDX3X	ATP-dependent RNA helicase DDX3X	196276	214124	234530	286757	250920	337935
O00629	O00629	IMA3_HUMAN	KPNA4	Importin subunit alpha-3		23938		66073.7	41547.2	53484.9
O00743;O00743-2;O00743-3	O00743;O00743-2;O00743-3	PPP6_HUMAN	PPP6C	Serine/threonine-protein phosphatase 6 catalytic subunit	250266	211319	280357	114880	163298	101448
O00757	O00757	F16P2_HUMAN	FBP2	Fructose-1,6-bisphosphatase isozyme 2	89551	93060.8	98513.6	51924.6	64369.6	48061.9
O00764	O00764;O00764-3	PDXK_HUMAN	PDXK	Pyridoxal kinase	279166	220622	189564	188470	201909	129050
O14545	O14545	TRAD1_HUMAN	TRAFD1	TRAF-type zinc finger domain-containing protein 1	25994.3	27858.7	33745	36100.3	41914	59250
O14579;O14579-2;O14579-3	O14579;O14579-2;O14579-3	COPE_HUMAN	COPE	Coatomer subunit epsilon			6373.43	48300.3	55522.6	25940.8
O14602;P47813	P47813;O14602	IF1AX_HUMAN;IF1AY_HUMAN	EIF1AX;EIF1AY	Eukaryotic translation initiation factor 1A, Y-chromosomal		20332.3		38997.5	40626.8	72770.7
O14618	O14618	CCS_HUMAN	CCS	Copper chaperone for superoxide dismutase	19038.9	22500.5		86937	95473.8	95144.6
O14744;O14744-2	O14744;O14744-2;O14744-3;O14744-5	ANM5_HUMAN	PRMT5	Protein arginine N-methyltransferase 5	501083	494089	510109	294419	278093	249847
O14745	O14745;O14745-2	NHRF1_HUMAN	NHERF1	Na(+)/H(+) exchange regulatory cofactor NHE-RF1	146582	303126	153772	424226	419064	483946
O14773	O14773	TPP1_HUMAN	TPP1	Tripeptidyl-peptidase 1	108916	116611	126669	350917	343241	216694
O14776;O14776-2	O14776;O14776-2	TCRG1_HUMAN	TCERG1	Transcription elongation regulator 1				38003.2	41162.6	40278.5
O14787-2	O14787;O14787-2	TNPO2_HUMAN	TNPO2	Isoform 2 of Transportin-2						15797.9
O14818	O14818;Q8TAA3;O14818-2;Q8TAA3-2;Q8TAA3-5	PSA7_HUMAN	PSMA7	Proteasome subunit alpha type-7	89716.5	111782	99690.3	122669	128656	118597
O14828;O14828-2	O14828;O14828-2	SCAM3_HUMAN	SCAMP3	Secretory carrier-associated membrane protein 3	49325.7	49810.1	31642.4	21610.5	33813.9	26481.2
O14908;O14908-2	O14908;O14908-2	GIPC1_HUMAN	GIPC1	PDZ domain-containing protein GIPC1		24118.5	14806.9	36872	45935.8	38990.3
O14929	O14929	HAT1_HUMAN	HAT1	Histone acetyltransferase type B catalytic subunit	134186	117424	123986	168159	128350	103382
O14950;P19105	O14950;P19105	ML12A_HUMAN;ML12B_HUMAN	MYL12A;MYL12B	Myosin regulatory light chain 12B		23051.2		49604.3	56382.8	58261.6
O14964	O14964;O14964-2	HGS_HUMAN	HGS	Hepatocyte growth factor-regulated tyrosine kinase substrate		5993.09		38904	38122	54823.6
O14974;O14974-2;O14974-3;O14974-4;O14974-5	O14974;O14974-2;O14974-3;O14974-4;O14974-5	MYPT1_HUMAN	PPP1R12A	Protein phosphatase 1 regulatory subunit 12A				78406.6	72839	122046
O14979	O14979;O14979-2;O14979-3	HNRDL_HUMAN	HNRNPDL	Heterogeneous nuclear ribonucleoprotein D-like	198127	222719	182148	634572	490905	428333
O14980	O14980	XPO1_HUMAN	XPO1	Exportin-1	156514	153666	167162	668445	691082	714880
O15020;O15020-2	O15020;O15020-2	SPTN2_HUMAN	SPTBN2	Spectrin beta chain, non-erythrocytic 2				47982	43353.7	67050.7
O15027;O15027-2;O15027-3;O15027-4;O15027-5	O15027;O15027-2;O15027-3;O15027-4;O15027-5	SC16A_HUMAN	SEC16A	Protein transport protein Sec16A	58268.8	65456.6	57491.9	44950.1	41297.7	69900
O15067	O15067	PUR4_HUMAN	PFAS	Phosphoribosylformylglycinamidine synthase	188010	201658	201951	144678	124295	125774
O15075;O15075-2	O15075;O15075-2	DCLK1_HUMAN	DCLK1	Serine/threonine-protein kinase DCLK1	27164.3	22715.9	26731.8	13681.5	21164.8	27940.2
O15084;O15084-1;O15084-4	O15084;Q8N8A2;O15084-1;O15084-2;O15084-4;Q8N8A2-2;Q8N8A2-3;Q8N8A2-4;Q8N8A2-5	ANR28_HUMAN	ANKRD28	Serine/threonine-protein phosphatase 6 regulatory ankyrin repeat subunit A	190986	160159	161396	164081	92998.8	140307
O15127	O15127	SCAM2_HUMAN	SCAMP2	Secretory carrier-associated membrane protein 2				15425.9	14664.4	14564.8
O15143	O15143	ARC1B_HUMAN	ARPC1B	Actin-related protein 2/3 complex subunit 1B	251229	214444	254657	211707	211185	162622
O15144	O15144	ARPC2_HUMAN	ARPC2	Actin-related protein 2/3 complex subunit 2	226638	208368	271634	214757	284874	153454
O15231;O15231-3;O15231-4;O15231-7	O15231;O15231-2;O15231-3;O15231-4;O15231-5;O15231-6;O15231-7;O15231-8;O15231-9	ZN185_HUMAN	ZNF185	Zinc finger protein 185	10755.7	10966.3	10796.8	49975.7	44996.3	74704.7
O15260;O15260-2	O15260;O15260-2;O15260-3	SURF4_HUMAN	SURF4	Surfeit locus protein 4	40360.7	48282.8	41515.5	25835.9	26174.6
O15269	O15269	SPTC1_HUMAN	SPTLC1	Serine palmitoyltransferase 1	120809	106104	112287	50868	70084.4	60527.7
O15294;O15294-3	O15294;O15294-3	OGT1_HUMAN	OGT	UDP-N-acetylglucosamine--peptide N-acetylglucosaminyltransferase 110 kDa subunit	32624.5	30339.2	21284	61566.1	69128.3	91677.1
O15305	O15305;O15305-2	PMM2_HUMAN	PMM2	Phosphomannomutase 2	45240.1	56352.9	51404	133161	127117	177794
O15321;O15321-2	O15321;O15321-2	TM9S1_HUMAN	TM9SF1	Transmembrane 9 superfamily member 1	19738.4	10829.1	18801		15598.2
O15327	O15327	INP4B_HUMAN	INPP4B	Inositol polyphosphate 4-phosphatase type II	20827.9	28484	20224.7	62102.7	70331.1	78111.6
O15355	O15355	PPM1G_HUMAN	PPM1G	Protein phosphatase 1G	288500	302088	265903	403711	373973	321928
O15357;O15357-2	O15357;O15357-2	SHIP2_HUMAN	INPPL1	Phosphatidylinositol 3,4,5-trisphosphate 5-phosphatase 2	61825.4	57290.3	52559.8	45787.2	41334.5	60211.6
O15371;O15371-2;O15371-3	O15371;O15371-2;O15371-3	EIF3D_HUMAN	EIF3D	Eukaryotic translation initiation factor 3 subunit D	173091	166635	175157	136790	145630	123949
O15372	O15372	EIF3H_HUMAN	EIF3H	Eukaryotic translation initiation factor 3 subunit H	837000	798238	816492	657860	731359	612377
O15460;O15460-2	O15460;O15460-2	P4HA2_HUMAN	P4HA2	Prolyl 4-hydroxylase subunit alpha-2	82466.6	91719	82338.9	38203.7	36184.1	62592.4
O15498	O15498;O15498-2	YKT6_HUMAN	YKT6	Synaptobrevin homolog YKT6	129756	155252	159193	176028	195312	288140
O43143	O43143	DHX15_HUMAN	DHX15	ATP-dependent RNA helicase DHX15	148409	133785	144648	171892	191343	161736
O43148;O43148-2	O43148;O43148-2	MCES_HUMAN	RNMT	mRNA cap guanine-N7 methyltransferase	26624.5	38500	43926.7
O43172;O43172-2	O43172;O43172-2	PRP4_HUMAN	PRPF4	U4/U6 small nuclear ribonucleoprotein Prp4	76790.4	71054.1	65634	47543.1	60343.1	39021.6
O43175	O43175	SERA_HUMAN	PHGDH	D-3-phosphoglycerate dehydrogenase	47854.6	51485.2	55768.3	210599	195621	271024
O43237	O43237;O43237-2	DC1L2_HUMAN	DYNC1LI2	Cytoplasmic dynein 1 light intermediate chain 2	29181.5	43114.6	36611.1	85587.4	93856.3	160741
O43242	O43242;O43242-2	PSMD3_HUMAN	PSMD3	26S proteasome non-ATPase regulatory subunit 3	193699	227972	259272	231079	249236	198208
O43252	O43252	PAPS1_HUMAN	PAPSS1	Bifunctional 3'-phosphoadenosine 5'-phosphosulfate synthase 1	135195	128681	144026	150544	166012	201632
O43390	O43390;O43390-2;O43390-4	HNRPR_HUMAN	HNRNPR	Heterogeneous nuclear ribonucleoprotein R	742406	645637	709502	2292170	2044970	1656140
O43390-4	O43390-2;O43390-4	HNRPR_HUMAN	HNRNPR	Isoform 4 of Heterogeneous nuclear ribonucleoprotein R	45976.4	51016.4	70915.4	105886	95420.8	71082.4
O43395	O43395;O43395-3	PRPF3_HUMAN	PRPF3	U4/U6 small nuclear ribonucleoprotein Prp3	143882	168295	156404	123759	148488	159784
O43396	O43396	TXNL1_HUMAN	TXNL1	Thioredoxin-like protein 1	147464	153961	155907	129091	138863	118994
O43414	O43414	ERI3_HUMAN	ERI3	ERI1 exoribonuclease 3	53464.7	42265.9	64233.8	41438.9	44369.7	32733.2
O43447;O43447-2	O43447;O43447-2	PPIH_HUMAN	PPIH	Peptidyl-prolyl cis-trans isomerase H	77731.8	69695.8	64707.2	111960	94859.2	94211.7
O43488	O43488;Q8NHP1	ARK72_HUMAN	AKR7A2	Aflatoxin B1 aldehyde reductase member 2	120051	131112	130002	208054	226152	232943
O43491-4	O43491-4	E41L2_HUMAN	EPB41L2	Isoform 4 of Band 4.1-like protein 2	12575	12565	18370.6	14802.1		33135.7
O43592	O43592	XPOT_HUMAN	XPOT	Exportin-T	43433.7	44962.8	42311.8	124089	95723.5	120652
O43598;O43598-2	O43598;O43598-2	DNPH1_HUMAN	DNPH1	2'-deoxynucleoside 5'-phosphate N-hydrolase 1	51234.9	77156.9	53463.7	149946	134979	98528.7
O43615	O43615	TIM44_HUMAN	TIMM44	Mitochondrial import inner membrane translocase subunit TIM44	38980.2	43926.5	41475.6	37450.6	40402.2	66367.8
O43670;O43670-2;O43670-3;O43670-4	O43670;O43670-2;O43670-3;O43670-4	ZN207_HUMAN	ZNF207	BUB3-interacting and GLEBS motif-containing protein ZNF207		29238.7		170894	155117	166924
O43681	O43681	GET3_HUMAN	GET3	ATPase GET3	135300	150756	151080	252758	240780	271661
O43684;O43684-2	O43684;O43684-2	BUB3_HUMAN	BUB3	Mitotic checkpoint protein BUB3	146495	146855	132805	103414	98374.8	88215.5
O43707	O43707;O43707-2;O43707-3	ACTN4_HUMAN	ACTN4	Alpha-actinin-4	288991	423411	285011	1463260	1438760	1138690
O43719	O43719	HTSF1_HUMAN	HTATSF1	HIV Tat-specific factor 1	30717.8	37520.7	31647.7	89043.3	92396.4	82495.8
O43747;O43747-2	O43747;O43747-2	AP1G1_HUMAN	AP1G1	AP-1 complex subunit gamma-1	60031.5	60769.6	74290.1	105310	111453	111327
O43776	O43776;O43776-2	SYNC_HUMAN	NARS1	Asparagine--tRNA ligase, cytoplasmic	326483	327606	325002	240793	238940	190436
O43795;O43795-2	O43795;Q9UBC5;O43795-2	MYO1B_HUMAN	MYO1B	Unconventional myosin-Ib	30794.3	38386.2	30769.2	16876.8	15536.5
O43809	O43809	CPSF5_HUMAN	NUDT21	Cleavage and polyadenylation specificity factor subunit 5	62032.6	63699.2	64076.3	92780.8	93619.7	65749.7
O43813	O43813	LANC1_HUMAN	LANCL1	Glutathione S-transferase LANCL1				136450	103984	125355
O43815;O43815-2	O43815;O43815-2	STRN_HUMAN	STRN	Striatin	23113	31168.4	45457.8	27677.1	25871	18430.8
O43823	O43823	AKAP8_HUMAN	AKAP8	A-kinase anchor protein 8	7082.71	18181.2	15102.1	31194.6	16589.3
O43837	O43837;O43837-3	IDH3B_HUMAN	IDH3B	Isocitrate dehydrogenase [NAD] subunit beta, mitochondrial	48010	35367.2	28969.6	32836.7	50688.4	63621
O43847;O43847-2	O43847;O43847-2	NRDC_HUMAN	NRDC	Nardilysin	106304	117937	111140	77967.5	106135	85265.5
O43852;O43852-2;O43852-3;O43852-4	O43852;O43852-10;O43852-11;O43852-12;O43852-13;O43852-14;O43852-2;O43852-3;O43852-4;O43852-5;O43852-6;O43852-7;O43852-8;O43852-9	CALU_HUMAN	CALU	Calumenin	123639	171664	118250	146755	158561	91612.5
O43865	O43865	SAHH2_HUMAN	AHCYL1	S-adenosylhomocysteine hydrolase-like protein 1	213288	221788	231851	123714	126531	143142
O60256	O60256;O60256-3	KPRB_HUMAN	PRPSAP2	Phosphoribosyl pyrophosphate synthase-associated protein 2	172970	209232	220953	241266	256633	304940
O60271;O60271-2;O60271-4	O60271;O60271-3;O60271-5;O60271-2;O60271-4;O60271-9	JIP4_HUMAN	SPAG9	C-Jun-amino-terminal kinase-interacting protein 4	45819.8	47628.7	48844.8	44411.7	62090	48324.9
O60313;O60313-10;O60313-11;O60313-13;O60313-2;O60313-9	O60313;O60313-10;O60313-2;O60313-9;O60313-11;O60313-13	OPA1_HUMAN	OPA1	Dynamin-like 120 kDa protein, mitochondrial		8141.06		27666.2	15447.8	25879.3
O60333;O60333-2;O60333-3;O60333-4	O43896;O60333;O60333-2;Q12756;O60333-3;O60333-4;Q12756-2;Q12756-3	KIF1B_HUMAN	KIF1B	Kinesin-like protein KIF1B	70966.3	73387.3	83315	76459.7	99558.9	75690.9
O60341;O60341-2	O60341;O60341-2	KDM1A_HUMAN	KDM1A	Lysine-specific histone demethylase 1A	838815	706517	673448	449062	474755	529710
O60437	O60437	PEPL_HUMAN	PPL	Periplakin				90787.2	84495	120922
O60493	O60493;O60493-3;O60493-4	SNX3_HUMAN	SNX3	Sorting nexin-3		23213.9	22178	78809	82926.3	120001
O60502	O60502;O60502-2;O60502-4	OGA_HUMAN	OGA	Protein O-GlcNAcase	236072	230843	232717	123658	120754	125492
O60506;O60506-2	O60506;O60506-4;O60506-2;O60506-3;O60506-5	HNRPQ_HUMAN	SYNCRIP	Heterogeneous nuclear ribonucleoprotein Q	179439	193575	151408	894785	781209	737994
O60508	O60508	PRP17_HUMAN	CDC40	Pre-mRNA-processing factor 17	89937.3	79024	80034.4	66055.9	40910.1	53013.3
O60547;O60547-2	O60547;O60547-2	GMDS_HUMAN	GMDS	GDP-mannose 4,6 dehydratase	117070	112857	114840	116868	117250	80192.9
O60568	O60568	PLOD3_HUMAN	PLOD3	Multifunctional procollagen lysine hydroxylase and glycosyltransferase LH3	84199	69444.4	56878.3	37436.9	34773.8	31746.8
O60610;O60610-2;O60610-3	O60610;O60610-2;O60610-3	DIAP1_HUMAN	DIAPH1	Protein diaphanous homolog 1	14421.5	14129.7	12856.2	73490.8	60795.6	108502
O60645	O60645	EXOC3_HUMAN	EXOC3	Exocyst complex component 3				24391.7	30295.6	60895
O60678;O60678-2	O60678;O60678-2	ANM3_HUMAN	PRMT3	Protein arginine N-methyltransferase 3	168333		178743		164369	91720.2
O60701	O60701;O60701-2;O60701-3	UGDH_HUMAN	UGDH	UDP-glucose 6-dehydrogenase	8036250	8412070	8598620	5547180	5271840	5501690
O60716;O60716-10;O60716-11;O60716-12;O60716-13;O60716-14;O60716-15;O60716-16;O60716-17;O60716-18;O60716-19;O60716-2;O60716-20;O60716-21;O60716-22;O60716-23;O60716-24;O60716-25;O60716-26;O60716-27;O60716-28;O60716-29;O60716-3;O60716-30;O60716-31;O60716-32;O60716-4;O60716-5;O60716-6;O60716-7;O60716-8;O60716-9	O60716;O60716-10;O60716-11;O60716-12;O60716-13;O60716-14;O60716-15;O60716-16;O60716-17;O60716-18;O60716-19;O60716-2;O60716-20;O60716-21;O60716-22;O60716-23;O60716-24;O60716-25;O60716-26;O60716-27;O60716-28;O60716-29;O60716-3;O60716-30;O60716-31;O60716-32;O60716-4;O60716-5;O60716-6;O60716-7;O60716-8;O60716-9	CTND1_HUMAN	CTNND1	Catenin delta-1				23906.7		58537.8
O60739;P41567	P41567;O60739	EIF1B_HUMAN;EIF1_HUMAN	EIF1;EIF1B	Eukaryotic translation initiation factor 1b	19580.7	33962.7	26258.5	70268.4	64161.2	66175.7
O60749;O60749-2	O60749;Q13596;O60749-2;Q13596-2	SNX2_HUMAN	SNX2	Sorting nexin-2		27678.8	43255.6	85707.9	117266	146353
O60762	O60762	DPM1_HUMAN	DPM1	Dolichol-phosphate mannosyltransferase subunit 1	48975.2	41897	48835.1	32388.1	36709	28329.5
O60763;O60763-2	O60763;O60763-2	USO1_HUMAN	USO1	General vesicular transport factor p115	16484.6	22490.1	14425.4	89682	68728.2	116569
O60814;P57053;P58876;P62807;Q5QNW6;Q5QNW6-2;Q93079;Q99877;Q99879;Q99880	O60814;P06899;P23527;P33778;P57053;P58876;P62807;Q16778;Q5QNW6;Q8N257;Q93079;Q96A08;Q99877;Q99879;Q99880;Q5QNW6-2	H2B1C_HUMAN;H2B1D_HUMAN;H2B1H_HUMAN;H2B1K_HUMAN;H2B1L_HUMAN;H2B1M_HUMAN;H2B1N_HUMAN;H2B2F_HUMAN;H2BFS_HUMAN	H2BC12;H2BC12L;H2BC13;H2BC14;H2BC15;H2BC18;H2BC4;H2BC5;H2BC9	Histone H2B type 1-K	493279	469964	579688	829329	713591	669032
O60884	O60884	DNJA2_HUMAN	DNAJA2	DnaJ homolog subfamily A member 2	201255	234736	214781	226983	321156	221690
O60936;O60936-3	O60936;O60936-3	NOL3_HUMAN	NOL3	Nucleolar protein 3				48241.3	17183.3	30702.8
O75044;P0DJJ0;P0DMP2	O75044;P0DJJ0;Q7Z6B7;P0DMP2;Q7Z6B7-2	SRG2B_HUMAN;SRG2C_HUMAN;SRGP2_HUMAN	SRGAP2;SRGAP2B;SRGAP2C	SLIT-ROBO Rho GTPase-activating protein 2		104652		141375	141547	160395
O75052;O75052-3	O75052;O75052-2;O75052-3	CAPON_HUMAN	NOS1AP	Carboxyl-terminal PDZ ligand of neuronal nitric oxide synthase protein	49165.7	30084.1	47392.6	56496.2	100953	55708
O75083	O75083	WDR1_HUMAN	WDR1	WD repeat-containing protein 1	882350	813479	815437	520294	561979	396520
O75116	O75116	ROCK2_HUMAN	ROCK2	Rho-associated protein kinase 2		9341.18	5331.94		19077.4	32111.6
O75131	O75131	CPNE3_HUMAN	CPNE3	Copine-3	675989	619039	589086	348942	348336	399585
O75150;O75150-4	O75150;O75150-4	BRE1B_HUMAN	RNF40	E3 ubiquitin-protein ligase BRE1B				46058.8	50400.3	71380.1
O75153	O75153	CLU_HUMAN	CLUH	Clustered mitochondria protein homolog	54858.4	59529.5	59458.9	64752.3	71224.2	67455.6
O75170;O75170-2;O75170-3;O75170-4;O75170-5;O75170-6	O75170;O75170-2;O75170-3;O75170-4;O75170-5;O75170-6	PP6R2_HUMAN	PPP6R2	Serine/threonine-protein phosphatase 6 regulatory subunit 2	199744	17660.6	278702	33856.3	220344
O75190;O75190-2;O75190-3	O75190;O75190-2;P25686;Q8NHS0;O75190-3;O75190-4;P25686-2	DNJB6_HUMAN	DNAJB6	DnaJ homolog subfamily B member 6	104102	94721.6	84989.9	59444.4	69892.8	65569.6
O75223	O75223;O75223-3	GGCT_HUMAN	GGCT	Gamma-glutamylcyclotransferase	632319	594144	587384	300876	309893	273793
O75317	O75317	UBP12_HUMAN	USP12	Ubiquitin carboxyl-terminal hydrolase 12	183450	148040	155566
O75340;O75340-2	O75340;O75340-2	PDCD6_HUMAN	PDCD6	Programmed cell death protein 6	38118.7	53477.6	47470	97902.4	109167	109903
O75347	O75347;O75347-2	TBCA_HUMAN	TBCA	Tubulin-specific chaperone A	10873.1	31753.9		49365.6	38449.6	29889.6
O75351	O75351	VPS4B_HUMAN	VPS4B	Vacuolar protein sorting-associated protein 4B						81391.7
O75368	O75368	SH3L1_HUMAN	SH3BGRL	Adapter SH3BGRL	19744.1	43003	28172.4	17082.9	16667.6	12573.5
O75369;O75369-2;O75369-8;O75369-9	O75369;O75369-2;O75369-3;O75369-6;O75369-7;O75369-8;O75369-9	FLNB_HUMAN	FLNB	Filamin-B	213112	309262	205460	859651	890905	1408420
O75390	O75390	CISY_HUMAN	CS	Citrate synthase, mitochondrial	79473.1	97086.3	77531.1	241464	236713	270468
O75396	O75396	SC22B_HUMAN	SEC22B	Vesicle-trafficking protein SEC22b		21884.4		93560.8	85372	109728
O75400;O75400-2;O75400-3	O75400;O75400-2;O75400-3	PR40A_HUMAN	PRPF40A	Pre-mRNA-processing factor 40 homolog A	12271.6	10925.7	12501.1	36046.3	36966.7	23030.6
O75436	O75436	VP26A_HUMAN	VPS26A	Vacuolar protein sorting-associated protein 26A	414822	313767	412625	222626	263679	200384
O75439	O75439	MPPB_HUMAN	PMPCB	Mitochondrial-processing peptidase subunit beta	112811	127775	114831	110125	69219.1	117056
O75467;Q6AW86	O75467;Q6AW86	Z324A_HUMAN;Z324B_HUMAN	ZNF324;ZNF324B	Zinc finger protein 324A		166373	118766	309165	305421	475424
O75494;O75494-2;O75494-3;O75494-4;O75494-5;O75494-6	O75494;O75494-2;O75494-3;O75494-4;O75494-5;O75494-6	SRS10_HUMAN	SRSF10	Serine/arginine-rich splicing factor 10	141122	150009	145966	233765	201578	189150
O75533	O75533	SF3B1_HUMAN	SF3B1	Splicing factor 3B subunit 1	37929.9	39471.1	41345.1	89808	95598.9	97974.7
O75534;O75534-2;O75534-3;O75534-4	O75534;O75534-2;O75534-3;O75534-4	CSDE1_HUMAN	CSDE1	Cold shock domain-containing protein E1	231235	225041	245443	241175	235189	270454
O75569;O75569-2;O75569-3	O75569;O75569-2;O75569-3	PRKRA_HUMAN	PRKRA	Interferon-inducible double-stranded RNA-dependent protein kinase activator A	24111.6	35192.4	35743.1	81281.3	86348.3	90082.7
O75607	O75607	NPM3_HUMAN	NPM3	Nucleoplasmin-3	38374.2	42796.4	37659.8	49327.2	50210.8	54183
O75608;O75608-2	O75608;O75608-2	LYPA1_HUMAN	LYPLA1	Acyl-protein thioesterase 1		94703		134282	129590	159784
O75643	O75643	U520_HUMAN	SNRNP200	U5 small nuclear ribonucleoprotein 200 kDa helicase	106471	118292	110898	146931	153381	156502
O75663	O75663;O75663-2	TIPRL_HUMAN	TIPRL	TIP41-like protein	120698	128538	119015	87592.5	100647	110283
O75717;O75717-2	O75717;O75717-2	WDHD1_HUMAN	WDHD1	WD repeat and HMG-box DNA-binding protein 1	27501.1	25835.8	17987.7	28065.9	27813.3	24386.5
O75792	O75792	RNH2A_HUMAN	RNASEH2A	Ribonuclease H2 subunit A	24252.1	32573.4	17668.3	73130.7	64479.9	107233
O75818;O75818-2	O75818;O75818-2	RPP40_HUMAN	RPP40	Ribonuclease P protein subunit p40	16351.2	19072.7	20089.2
O75821	O75821	EIF3G_HUMAN	EIF3G	Eukaryotic translation initiation factor 3 subunit G	156116	168285	148714	137442	148730	131606
O75832;O75832-2	O75832;O75832-2	PSD10_HUMAN	PSMD10	26S proteasome non-ATPase regulatory subunit 10	25858	30433.2	36831.7	91098.6	94742.5	85119.7
O75874	O75874	IDHC_HUMAN	IDH1	Isocitrate dehydrogenase [NADP] cytoplasmic	465329	526697	449074	563480	523665	470538
O75886;Q92783;Q92783-2	O75886;Q92783;Q92783-2	STAM1_HUMAN;STAM2_HUMAN	STAM;STAM2	Signal transducing adapter molecule 2		14093.4	18058	18670.1	30527.4	55978.2
O75935;O75935-2	O75935;O75935-2	DCTN3_HUMAN	DCTN3	Dynactin subunit 3				37580.2	27431.8	45215.6
O76003	O76003	GLRX3_HUMAN	GLRX3	Glutaredoxin-3	74194.1	112800	72710.7	405134	443482	588311
O76013;O76013-2;Q14532	O76013;O76013-2;Q14532	K1H2_HUMAN;KRT36_HUMAN	KRT32;KRT36	Keratin, type I cuticular Ha6	243478	272829	252650	357280	280342	246260
O76027	O76027	ANXA9_HUMAN	ANXA9	Annexin A9		18328		44861.6	64666.2	112363
O76071	O76071	CIAO1_HUMAN	CIAO1	Probable cytosolic iron-sulfur protein assembly protein CIAO1	553660	414132	444766	140067	150970	153419
O76094;O76094-2	O76094;O76094-2	SRP72_HUMAN	SRP72	Signal recognition particle subunit SRP72	52088.2	45292.5	58761.3	63325.7	62216.2	79453.5
O94762;O94762-2;O94762-3;O94762-4	O94762;O94762-2;O94762-3;O94762-4	RECQ5_HUMAN	RECQL5	ATP-dependent DNA helicase Q5	81471.1	100973	130221	164736	129766	90325.8
O94782	O94782	UBP1_HUMAN	USP1	Ubiquitin carboxyl-terminal hydrolase 1	163423	149500	150733
O94855;O94855-2	O94855;O94855-2	SC24D_HUMAN	SEC24D	Protein transport protein Sec24D	34595.8	23177.9	18834.9	48619.8	51786.2	29429.9
O94874	O94874;O94874-3	UFL1_HUMAN	UFL1	E3 UFM1-protein ligase 1				15789.9	20491	32402.4
O94888	O94888	UBXN7_HUMAN	UBXN7	UBX domain-containing protein 7				8639.52		21112.2
O94906;O94906-2	O94906;O94906-2	PRP6_HUMAN	PRPF6	Pre-mRNA-processing factor 6						23626.4
O94925-3	O94925;O94925-3	GLSK_HUMAN	GLS	Isoform 3 of Glutaminase kidney isoform, mitochondrial		17038.3	6462.42	34988.2		46674.2
O94952;O94952-1	O94952;O94952-1	FBX21_HUMAN	FBXO21	F-box only protein 21					15955.1	27750
O94966-2	O94966-2;O94966-4	UBP19_HUMAN	USP19	Isoform 2 of Ubiquitin carboxyl-terminal hydrolase 19	12715.2	10825.5	21316.2
O94966-5	O94966;O94966-2;O94966-3;O94966-4;O94966-5;O94966-6;O94966-7	UBP19_HUMAN	USP19	Isoform 5 of Ubiquitin carboxyl-terminal hydrolase 19	1296770	1293470	1395470	79238.3	74431.2	113231
O94973;O94973-2;O94973-3	O94973;O94973-2;O94973-3	AP2A2_HUMAN	AP2A2	AP-2 complex subunit alpha-2	75521.7	61373.8	97637.8	178950	200309	163467
O94979;O94979-2;O94979-3;O94979-8;O94979-9	O94979;O94979-10;O94979-2;O94979-3;O94979-4;O94979-5;O94979-6;O94979-7;O94979-8;O94979-9	SC31A_HUMAN	SEC31A	Protein transport protein Sec31A	248289	247458	246809	275438	249749	306785
O94985;O94985-2	O94985;O94985-2	CSTN1_HUMAN	CLSTN1	Calsyntenin-1	61353.8	46138.7	65266.2	74464.8	88521.7	71055.2
O95071;O95071-2	O95071;O95071-2	UBR5_HUMAN	UBR5	E3 ubiquitin-protein ligase UBR5	15161.5	19319	18232.5		10862.8
O95163	O95163	ELP1_HUMAN	ELP1	Elongator complex protein 1	71905.2	69296.7	74922.3	47128.6	57578.3	55140.6
O95197;O95197-2;O95197-3;O95197-4;O95197-7	O95197;O95197-3;O95197-2;O95197-4;O95197-7	RTN3_HUMAN	RTN3	Reticulon-3	41379	26653.9	17079.5	88818	60707.9	70337.7
O95218;O95218-2	O95218;O95218-2	ZRAB2_HUMAN	ZRANB2	Zinc finger Ran-binding domain-containing protein 2	166488	170101	101889	187948	145098	115994
O95219;O95219-2	O95219;O95219-2	SNX4_HUMAN	SNX4	Sorting nexin-4				23905.8	18639.4	38929.7
O95340;O95340-2	O95340;O95340-2	PAPS2_HUMAN	PAPSS2	Bifunctional 3'-phosphoadenosine 5'-phosphosulfate synthase 2	415505	439523	412492	317408	285764	494262
O95347;O95347-2	O95347;O95347-2	SMC2_HUMAN	SMC2	Structural maintenance of chromosomes protein 2	582598	594349	521957	557386	652657	620829
O95352;O95352-2;O95352-3	O95352;O95352-2;O95352-3	ATG7_HUMAN	ATG7	Ubiquitin-like modifier-activating enzyme ATG7	28045.1	25013.3	24887.8	20684.4	25373.3	25709.1
O95361	O95361;O95361-2;Q309B1	TRI16_HUMAN	TRIM16	Tripartite motif-containing protein 16	113961	112485	101311	78864.3	76540.6	104703
O95363	O95363	SYFM_HUMAN	FARS2	Phenylalanine--tRNA ligase, mitochondrial	25450.4	14328.3			13309.5
O95373	O95373	IPO7_HUMAN	IPO7	Importin-7	43412.5	52259	48987.5	97268.1	109084	108965
O95394;O95394-3;O95394-4	O95394;O95394-3;O95394-4	AGM1_HUMAN	PGM3	Phosphoacetylglucosamine mutase	69485.3	77666.2	85401.2	52147.5	44676	33981.5
O95396	O95396	MOCS3_HUMAN	MOCS3	Adenylyltransferase and sulfurtransferase MOCS3	89204.3	100187	106436	63632.6	77675.7	98167.9
O95429;O95429-2	O95429;O95429-2	BAG4_HUMAN	BAG4	BAG family molecular chaperone regulator 4	21504	18344.9	15171
O95433	O95433	AHSA1_HUMAN	AHSA1	Activator of 90 kDa heat shock protein ATPase homolog 1	382068	358849	358042	298905	322277	428619
O95453;O95453-2;O95453-3	O95453;O95453-2;O95453-3;O95453-4	PARN_HUMAN	PARN	Poly(A)-specific ribonuclease PARN	45486.9	40629.7	31989.9	37831.6	34828.9	45776.4
O95456;O95456-2	O95456;O95456-2	PSMG1_HUMAN	PSMG1	Proteasome assembly chaperone 1	53834.9	53346.5	63648.5	20790.7	17147.7	22315.9
O95486	O95486;O95486-2	SC24A_HUMAN	SEC24A	Protein transport protein Sec24A	41874.2	29653.7	25844.8	41423.4	35410.2	38331.1
O95487;O95487-2;O95487-3	O95487;O95487-2;O95487-3	SC24B_HUMAN	SEC24B	Protein transport protein Sec24B	37030.7	25346.5	38948.5	45523.7	54230.6	37296.2
O95671;O95671-2;O95671-3	O95671;O95671-2;O95671-3	ASML_HUMAN	ASMTL	Probable bifunctional dTTP/UTP pyrophosphatase/methyltransferase protein	122798	121988	100971	102908	94199	117587
O95685	O95685	PPR3D_HUMAN	PPP1R3D	Protein phosphatase 1 regulatory subunit 3D	110604	93840.6	130718	18020.2	30092.7	25847.9
O95716;P20337;Q96E17	O95716;P20337;Q96E17	RAB3B_HUMAN;RAB3C_HUMAN;RAB3D_HUMAN	RAB3B;RAB3C;RAB3D	Ras-related protein Rab-3D		27743.6
O95747	O95747	OXSR1_HUMAN	OXSR1	Serine/threonine-protein kinase OSR1	22891.7	26570.4	25972.1	55618.6	47239.5	108438
O95758;O95758-1;O95758-2;O95758-4;O95758-5;O95758-6;O95758-7	O95758;O95758-1;O95758-2;O95758-4;O95758-5;O95758-6;O95758-7	PTBP3_HUMAN	PTBP3	Polypyrimidine tract-binding protein 3	169833	177582	139628	231692	207450	391736
O95777	O95777	LSM8_HUMAN	LSM8	U6 snRNA-associated Sm-like protein LSm8	28415.1	40480.5	44349.8	53698.6	53181.3	23131.8
O95782;O95782-2	O95782;O95782-2	AP2A1_HUMAN	AP2A1	AP-2 complex subunit alpha-1	156178	164888	175857	278138	289565	334762
O95793;O95793-2	O95793;O95793-2;O95793-3	STAU1_HUMAN	STAU1	Double-stranded RNA-binding protein Staufen homolog 1	101839	124018	109821	127790	100472	109780
O95817	O95817	BAG3_HUMAN	BAG3	BAG family molecular chaperone regulator 3			14127.4	40473.5	28687.8	34286.5
O95831;O95831-3	O95831;O95831-3;O95831-5;O95831-2	AIFM1_HUMAN	AIFM1	Apoptosis-inducing factor 1, mitochondrial	65735.7	67620.3	102113	50899.4	62186.1	25875.8
O95833	O95833	CLIC3_HUMAN	CLIC3	Chloride intracellular channel protein 3	44530.3	181974	44779.6	263789	244007	280623
O95834;O95834-2;O95834-3	O95834;O95834-2;O95834-3	EMAL2_HUMAN	EML2	Echinoderm microtubule-associated protein-like 2	95695.3	88036.8	98728	64742.9	70325.1	46182.2
O95837	O95837;P29992;P50148	GNA14_HUMAN	GNA14	Guanine nucleotide-binding protein subunit alpha-14	25086.1	19569.3	16585.7	8724.58	24820.8	28434.7
O95848	O95848	NUD14_HUMAN	NUDT14	Uridine diphosphate glucose pyrophosphatase NUDT14	42543	38655.2	35027.7
O95861;O95861-3;O95861-4	O95861;O95861-3;O95861-4	BPNT1_HUMAN	BPNT1	3'(2'),5'-bisphosphate nucleotidase 1	198661	160633	159797	149081	124297	121976
O95865	O94760;O95865;O94760-2	DDAH2_HUMAN	DDAH2	N(G),N(G)-dimethylarginine dimethylaminohydrolase 2	23625.3	20871.6	28178.3	36483	35806.4	23656.2
O95994	O95994	AGR2_HUMAN	AGR2	Anterior gradient protein 2 homolog	277565	504465	285069	1068370	976425	1351340
O96008;O96008-2	O96008;O96008-2	TOM40_HUMAN	TOMM40	Mitochondrial import receptor subunit TOM40 homolog	80546.9	66164.6	83188.4	59990.1	69863	32785
O96019	O96019	ACL6A_HUMAN	ACTL6A	Actin-like protein 6A	359833	304364	347147	236719	221738	201185
P00338;P00338-3	P00338;P00338-3;P00338-4	LDHA_HUMAN	LDHA	L-lactate dehydrogenase A chain	2580950	2808010	2843460	1141240	1169680	1070200
P00367	P00367;P49448;P00367-3	DHE3_HUMAN	GLUD1	Glutamate dehydrogenase 1, mitochondrial	439488	432347	453982	273726	256509	173110
P00374;P00374-2	P00374;P00374-2	DYR_HUMAN	DHFR	Dihydrofolate reductase	124952	121243	120685	66486.3	54104.6	82381.1
P00387;P00387-2;P00387-3	P00387;P00387-2;P00387-3	NB5R3_HUMAN	CYB5R3	NADH-cytochrome b5 reductase 3	240536	220017	228814	126257	107776	80956.3
P00390;P00390-2;P00390-3	P00390;P00390-2;P00390-3;P00390-4;P00390-5	GSHR_HUMAN	GSR	Glutathione reductase, mitochondrial	573923	561200	611592	125275	113717	66181.6
P00403	P00403	COX2_HUMAN	MT-CO2	Cytochrome c oxidase subunit 2	97128.9	102434	106495	61700.9	78320.1	70944.7
P00441	P00441	SODC_HUMAN	SOD1	Superoxide dismutase [Cu-Zn]	302114	471195	268756	290059	227922	142271
P00450	P00450	CERU_HUMAN	CP	Ceruloplasmin	92305.4	104675	111571	274455	256874	175802
P00480	P00480	OTC_HUMAN	OTC	Ornithine transcarbamylase, mitochondrial				66548
P00491	P00491	PNPH_HUMAN	PNP	Purine nucleoside phosphorylase	650680	624828	641252	379795	452854	241242
P00492	P00492	HPRT_HUMAN	HPRT1	Hypoxanthine-guanine phosphoribosyltransferase	150465	206516	174030	127604	125663	88539.9
P00505;P00505-2	P00505;P00505-2	AATM_HUMAN	GOT2	Aspartate aminotransferase, mitochondrial	120200	138703	99050.6	95140.8	91164.8	60067.5
P00558	P00558;P00558-2	PGK1_HUMAN	PGK1	Phosphoglycerate kinase 1	556405	930984	641524	1693690	1665020	1715100
P00568	P00568	KAD1_HUMAN	AK1	Adenylate kinase isoenzyme 1	20704.8			166071	163491	269316
P00738;P00738-2	P00738;P00738-2	HPT_HUMAN	HP	Haptoglobin	180761	151823	167557	479640	461991	308974
P00751	P00751	CFAB_HUMAN	CFB	Complement factor B	14833.5			14955.8	20909
P00918	P00918	CAH2_HUMAN	CA2	Carbonic anhydrase 2	732752	703556	709789	516559	529874	410375
P00966	P00966	ASSY_HUMAN	ASS1	Argininosuccinate synthase	382423	367602	376626	289166	238381	203828
P01111	P01111;P01116;P01116-2	RASN_HUMAN	NRAS	GTPase NRas	200101	186216	190238	69486.4	69778.4	71080.3
P01834	P01834;P0DOX7	IGKC_HUMAN	IGKC	Immunoglobulin kappa constant	39592	30825.9	30618.3	121402	53778.9	36658.9
P01857;P01857-1;P01860;P01860-1	P01857;P01860;P01861;P0DOX5;P01857-1;P01860-1;P01861-1	IGHG1_HUMAN;IGHG3_HUMAN	IGHG1;IGHG3	Immunoglobulin heavy constant gamma 1	351846	344552	251689	579929	432494	455937
P01859;P01859-1	P01859;P01859-1	IGHG2_HUMAN	IGHG2	Immunoglobulin heavy constant gamma 2	4463190	3541540	4188880	5740160	5301670	4876560
P02533	P02533	K1C14_HUMAN	KRT14	Keratin, type I cytoskeletal 14	142703	137490	298678	836613	389092	264368
P02538	O95678;P02538;P48668	K2C6A_HUMAN	KRT6A	Keratin, type II cytoskeletal 6A	148046	107833	494064	1576870	638501	275065
P02545;P02545-2;P02545-3;P02545-6	P02545;P02545-2;P02545-3;P02545-4;P02545-5;P02545-6	LMNA_HUMAN	LMNA	Prelamin-A/C	43144.9	45180.9	42133.2	95762.5	87207.3	118823
P02686;P02686-3;P02686-4;P02686-5;P02686-6	P02686;P02686-3;P02686-4;P02686-5;P02686-6	MBP_HUMAN	MBP	Myelin basic protein	23947.7	43394.9	23109	34593	33716.9	43517.9
P02768	P02768	ALBU_HUMAN	ALB	Albumin	1250790	1097600	1365850	3990280	3921330	2687120
P02786	P02786	TFR1_HUMAN	TFRC	Transferrin receptor protein 1	107609	107609	135509	184562	214489	133235
P02787	P02787	TRFE_HUMAN	TF	Serotransferrin	236910	232592	246493	584349	569266	411992
P02788;P02788-2	P02788;P02788-2	TRFL_HUMAN	LTF	Lactotransferrin	76275.7	73148.1	56430.6	82801.9	80905.3	73862.5
P02790	P02790	HEMO_HUMAN	HPX	Hemopexin	152014	140716	140990	311447	316953	214909
P02792	P02792	FRIL_HUMAN	FTL	Ferritin light chain				67139.7	53679.6
P02794	P02794	FRIH_HUMAN	FTH1	Ferritin heavy chain	244657	228004	241217	864376	822064	390107
P04040	P04040	CATA_HUMAN	CAT	Catalase	23477.8	19533.5	22168.8	47488.3	36916	27298.1
P04049;P04049-2;P10398	P04049;P10398;P04049-2	ARAF_HUMAN;RAF1_HUMAN	ARAF;RAF1	RAF proto-oncogene serine/threonine-protein kinase	79905.4	84562.8	93358.1	20886	14614.9	62873.1
P04062;P04062-2;P04062-3;P04062-4;P04062-5	P04062;P04062-2;P04062-3;P04062-4;P04062-5	GBA1_HUMAN	GBA1	Lysosomal acid glucosylceramidase	14364.7		39213.7	68885.7	85396.4
P04066	P04066	FUCO_HUMAN	FUCA1	Tissue alpha-L-fucosidase	45926.2	40535.5	65622.6	114497	115988	63644.7
P04075	P04075;P05062;P09972;P04075-2	ALDOA_HUMAN	ALDOA	Fructose-bisphosphate aldolase A	5781250	6477310	5962880	2676340	2725370	2008990
P04080	P04080	CYTB_HUMAN	CSTB	Cystatin-B	162773	219870	207380	238664	223268	146937
P04181	P04181	OAT_HUMAN	OAT	Ornithine aminotransferase, mitochondrial	88215.4	93740	77168.9	43897.6	41666.2	36526.1
P04183	P04183	KITH_HUMAN	TK1	Thymidine kinase, cytosolic	23815.9	28908.6	22971	30922.7	31625.5	37453.2
P04216	P04216	THY1_HUMAN	THY1	Thy-1 membrane glycoprotein	87445.9	95568.1	61822.5	83733.5	92629.3	106151
P04259	P04259;P48668	K2C6B_HUMAN	KRT6B	Keratin, type II cytoskeletal 6B	25281.2	21635.4	63902.5	174332	61474.8	20842.5
P04264	P04259;P04264	K2C1_HUMAN	KRT1	Keratin, type II cytoskeletal 1	5459070	5186070	6084230	15401600	10378500	8844430
P04406	P04406;P04406-2	G3P_HUMAN	GAPDH	Glyceraldehyde-3-phosphate dehydrogenase	17966000	18847600	23077200	10487000	12130700	8226490
P04424;P04424-2;P04424-3	P04424;P04424-2;P04424-3	ARLY_HUMAN	ASL	Argininosuccinate lyase	51376.6	60259.2	45437	117226	64189.6	65011.1
P04632	P04632;Q96L46	CPNS1_HUMAN	CAPNS1	Calpain small subunit 1	77663.5	74209.3	57969	184969	173822	186932
P04792	P04792	HSPB1_HUMAN	HSPB1	Heat shock protein beta-1	5305740	7061460	5429720	4040020	3522390	3017600
P04843	P04843	RPN1_HUMAN	RPN1	Dolichyl-diphosphooligosaccharide--protein glycosyltransferase subunit 1	555566	521589	542048	373026	397567	318656
P04844;P04844-2	P04844;P04844-2	RPN2_HUMAN	RPN2	Dolichyl-diphosphooligosaccharide--protein glycosyltransferase subunit 2	77293.2	78499.9	82459.9	50419.3	50536.4	45250.6
P04899;P04899-4	P04899;P04899-2;P04899-3;P04899-4;P04899-5;P04899-6	GNAI2_HUMAN	GNAI2	Guanine nucleotide-binding protein G(i) subunit alpha-2			29491.1	37575.6
P05023;P05023-3;P05023-4	P05023;P05023-2;P05023-3;P05023-4	AT1A1_HUMAN	ATP1A1	Sodium/potassium-transporting ATPase subunit alpha-1	128123	143330	117164	151818	145020	147602
P05026;P05026-2	P05026;P05026-2	AT1B1_HUMAN	ATP1B1	Sodium/potassium-transporting ATPase subunit beta-1	129213	139482	102679	137347	131348	132391
P05062	P05062	ALDOB_HUMAN	ALDOB	Fructose-bisphosphate aldolase B				88215.9
P05091	P00352;P05091	ALDH2_HUMAN	ALDH2	Aldehyde dehydrogenase, mitochondrial				50473	17374.7	12176
P05109	P05109	S10A8_HUMAN	S100A8	Protein S100-A8	22186.6	23967.7	45556.6	197969	45295.1	76087.6
P05141	P05141;P12235;P12236;Q9H0C2	ADT2_HUMAN	SLC25A5	ADP/ATP translocase 2	637073	675602	703395	544650	582306	723939
P05161	P05161	ISG15_HUMAN	ISG15	Ubiquitin-like protein ISG15	256787	269959	298684	245794	280262	282212
P05165;P05165-2;P05165-3	P05165;P05165-2;P05165-3	PCCA_HUMAN	PCCA	Propionyl-CoA carboxylase alpha chain, mitochondrial	29751.7	22486.4	23064	9958.69		19649.7
P05186;P05186-2;P05186-3	P05186;P05186-2;P05186-3	PPBT_HUMAN	ALPL	Alkaline phosphatase, tissue-nonspecific isozyme	20956.3			57369.8	68987	17157
P05198	P05198	IF2A_HUMAN	EIF2S1	Eukaryotic translation initiation factor 2 subunit 1	275209	259682	316279	187351	185601	179100
P05386	P05386	RLA1_HUMAN	RPLP1	Large ribosomal subunit protein P1	8975.96	21987.3	16923	65150	52602.4	85181.1
P05388	P05388;Q8NHW5;P05388-2	RLA0_HUMAN	RPLP0	Large ribosomal subunit protein uL10	205073	225285	266233	379391	412424	300944
P05455	P05455	LA_HUMAN	SSB	Lupus La protein	97853.9	96773.3	93363	136579	132196	98989.9
P05783	P05783	K1C18_HUMAN	KRT18	Keratin, type I cytoskeletal 18	1705120	1900590	1934010	1107550	1268440	1660090
P05787;P05787-2	P05787;P05787-2	K2C8_HUMAN	KRT8	Keratin, type II cytoskeletal 8	2640580	3039740	2995810	2047860	2096930	2608940
P06132	P06132	DCUP_HUMAN	UROD	Uroporphyrinogen decarboxylase	58501.3	120453	109200		148921	129857
P06241;P06241-2;P06241-3;P07947;P12931;P12931-2;P12931-3	P06239;P06241;P06241-3;P07947;P12931;P06239-3;P06241-2;P12931-2;P12931-3	FYN_HUMAN;SRC_HUMAN;YES_HUMAN	FYN;SRC;YES1	Tyrosine-protein kinase Fyn	41569.4	40090.3	45952.8	55092.5	58157.8	40525.3
P06280	P06280	AGAL_HUMAN	GLA	Alpha-galactosidase A	234420	185649	243488	101616	121303	96756.8
P06396-2	P06396;P06396-2;P06396-3;P06396-4	GELS_HUMAN	GSN	Isoform 2 of Gelsolin	361968	479956	398784	544680	547965	525977
P06454;P06454-2	P06454;P06454-2	PTMA_HUMAN	PTMA	Prothymosin alpha	46316.5	125134	46589.4	65684.4	59395.5	31279.3
P06493	P06493	CDK1_HUMAN	CDK1	Cyclin-dependent kinase 1	89332.5	69251.7	69480.6	117577	115853	113740
P06576	P06576	ATPB_HUMAN	ATP5F1B	ATP synthase subunit beta, mitochondrial	179446	184520	162634	197250	176438	121553
P06702	P06702	S10A9_HUMAN	S100A9	Protein S100-A9	68974.7	61241.9	105696	509071	110362	128586
P06730;P06730-2;P06730-3	P06730;P06730-2;P06730-3	IF4E_HUMAN	EIF4E	Eukaryotic translation initiation factor 4E	107449	123348	88044.9	132080	150652	158213
P06733	P06733;P06733-2	ENOA_HUMAN	ENO1	Alpha-enolase	1972030	1940250	1481400	1470920	1199650	956230
P06737;P06737-2	P06737;P06737-2	PYGL_HUMAN	PYGL	Glycogen phosphorylase, liver form	31171.6	42745.2	27930.1	20148.3	19115.3
P06744;P06744-2	P06744;P06744-2	G6PI_HUMAN	GPI	Glucose-6-phosphate isomerase	331205	396201	320139	323515	346489	210374
P06748;P06748-2;P06748-3	P06748;P06748-2;P06748-3	NPM_HUMAN	NPM1	Nucleophosmin	252015	336025	288383	711649	640246	783363
P06753-2;P06753-3;P06753-4;P06753-5;P06753-6	P06753;P06753-2;P06753-3;P06753-4;P06753-5;P06753-6;P06753-7	TPM3_HUMAN	TPM3	Isoform 2 of Tropomyosin alpha-3 chain	40208.1	84916.5	39708.3	98739.9	78428.4	87264.2
P06865	P06865	HEXA_HUMAN	HEXA	Beta-hexosaminidase subunit alpha	88511.3	90266.2	84661.2	51079.5	64059.6	39352.2
P06899;P23527;P33778;Q16778;Q8N257	P06899;P23527;P33778;Q16778;Q6DN03;Q6DRA6;Q8N257	H2B1B_HUMAN;H2B1J_HUMAN;H2B1O_HUMAN;H2B2E_HUMAN;H2B3B_HUMAN	H2BC11;H2BC17;H2BC21;H2BC26;H2BC3	Histone H2B type 1-J	49954.2	37781.7	36114.3	76021.7	60139.3	58626.5
P07099	P07099	HYEP_HUMAN	EPHX1	Epoxide hydrolase 1	32791.9	33464.8	24285.9	12666.5
P07195	P07195	LDHB_HUMAN	LDHB	L-lactate dehydrogenase B chain	74521.7	98990.2	81718.3	148307	89536.5	115501
P07237	P07237	PDIA1_HUMAN	P4HB	Protein disulfide-isomerase	207698	346598	201008	483290	426068	388905
P07339	P07339	CATD_HUMAN	CTSD	Cathepsin D	1548150	1591710	1615810	878151	980829	777716
P07355;P07355-2	A6NMY6;P07355;P07355-2	ANXA2_HUMAN	ANXA2	Annexin A2	103387	157167	94705.4	291742	282877	213741
P07384	P07384	CAN1_HUMAN	CAPN1	Calpain-1 catalytic subunit	585928	580848	581149	345341	452163	347192
P07437	P04350;P07437;P68371	TBB5_HUMAN	TUBB	Tubulin beta chain	14750900	15109500	13667000	14745700	14205500	22176800
P07451	P07451	CAH3_HUMAN	CA3	Carbonic anhydrase 3				127677
P07477	P07477;Q9BYE2;Q9BYE2-2;Q9BYE2-3;Q9BYE2-6	TRY1_HUMAN	PRSS1	Serine protease 1	1762280	1482410	1577110	2192430	2068000	2241450
P07602;P07602-2;P07602-3	P07602;P07602-2;P07602-3	SAP_HUMAN	PSAP	Prosaposin	37212.3	23593.2	35417
P07686	P07686	HEXB_HUMAN	HEXB	Beta-hexosaminidase subunit beta	193906	186166	175826	81426.2	82707.2	77084.3
P07737	P07737	PROF1_HUMAN	PFN1	Profilin-1	1947820	2143420	2707760	1974550	2393750	1788170
P07741;P07741-2	P07741;P07741-2	APT_HUMAN	APRT	Adenine phosphoribosyltransferase	785420	827275	858806	786494	881211	730136
P07814	P07814	SYEP_HUMAN	EPRS1	Bifunctional glutamate/proline--tRNA ligase	203632	224062	203885	385806	389448	368505
P07900;P07900-2	P07900;P07900-2	HS90A_HUMAN	HSP90AA1	Heat shock protein HSP 90-alpha	2256510	2870560	2371280	2284930	2365600	2652800
P07910;P07910-2	P07910;P07910-2;P07910-3;P07910-4	HNRPC_HUMAN	HNRNPC	Heterogeneous nuclear ribonucleoproteins C1/C2	513452	630198	653739	1144520	1167080	1059190
P07954;P07954-2	P07954;P07954-2	FUMH_HUMAN	FH	Fumarate hydratase, mitochondrial	18315.4	28870.1
P08133;P08133-2	P08133;P08133-2	ANXA6_HUMAN	ANXA6	Annexin A6	75238.1	84395.1	76334.1	168532	166200	176428
P08195;P08195-2;P08195-3;P08195-4;P08195-5	P08195;P08195-4;P08195-2;P08195-3;P08195-5	4F2_HUMAN	SLC3A2	4F2 cell-surface antigen heavy chain	56996.3	54426.8	37007.8	109544	135219	126021
P08236;P08236-2;P08236-3	P08236;P08236-2;P08236-3	BGLR_HUMAN	GUSB	Beta-glucuronidase	26316.3	36210.3	38834	69333.4	50222.2	30851.6
P08237;P08237-3	P08237;P08237-2;P08237-3	PFKAM_HUMAN	PFKM	ATP-dependent 6-phosphofructokinase, muscle type	109580	108602	116831	71622.5	70308.7	70239.2
P08238	P07900;P08238;Q14568;Q58FF8;P07900-2	HS90B_HUMAN	HSP90AB1	Heat shock protein HSP 90-beta	3940800	4328320	4134890	5225940	5586620	6412380
P08243;P08243-2;P08243-3	P08243;P08243-2;P08243-3	ASNS_HUMAN	ASNS	Asparagine synthetase [glutamine-hydrolyzing]	180718	189962	197267	220170	175662	213890
P08397;P08397-2	P08397;P08397-2;P08397-3;P08397-4	HEM3_HUMAN	HMBS	Porphobilinogen deaminase	60473.4	35287.2	42335.5	53305.6	59577.1	94031
P08559;P08559-2;P08559-3;P08559-4	P08559;P08559-2;P08559-3;P08559-4	ODPA_HUMAN	PDHA1	Pyruvate dehydrogenase E1 component subunit alpha, somatic form, mitochondrial	78335.1	65144.2	75849.8	60434.1	59857.5	68156.1
P08574	P08574	CY1_HUMAN	CYC1	Cytochrome c1, heme protein, mitochondrial	22009.6	25391.9	22355.7		10034.6
P08621;P08621-2	P08621;P08621-2;P08621-3	RU17_HUMAN	SNRNP70	U1 small nuclear ribonucleoprotein 70 kDa	128860	96982.8	81864.3	100044	97586	77597.1
P08708	P08708	RS17_HUMAN	RPS17	Small ribosomal subunit protein eS17	144476	112445	115758	161934	150733	127871
P08727	P02533;P08727;P08779;P19012;Q04695;P19012-2	K1C19_HUMAN	KRT19	Keratin, type I cytoskeletal 19	1706850	2004320	1948700	1570590	1625190	1797620
P08754	P08754	GNAI3_HUMAN	GNAI3	Guanine nucleotide-binding protein G(i) subunit alpha-3	55861.1	42089.1	54754.7	21825.6	30764.2	23229.6
P08758	P08758	ANXA5_HUMAN	ANXA5	Annexin A5	72521.6	129275	76399.8	226051	201507	182762
P08779	P08779	K1C16_HUMAN	KRT16	Keratin, type I cytoskeletal 16	147532	63417.5	531736	1371650	553231	249390
P08865	P08865;A0A8I5KQE6	RSSA_HUMAN	RPSA	Small ribosomal subunit protein uS2	67034.9	77392.1	87130.4	88525.7	81371.6	63553.6
P09001	P09001	RM03_HUMAN	MRPL3	Large ribosomal subunit protein uL3m	61151	54742.6	52378.7	36131.1	27106.7	28716.9
P09132	P09132	SRP19_HUMAN	SRP19	Signal recognition particle 19 kDa protein	13565.3	33026.9	21486.2			20754.3
P09211	P09211	GSTP1_HUMAN	GSTP1	Glutathione S-transferase P	63530.3	38132.2	38499.3	277285	189223	107228
P09382	P09382	LEG1_HUMAN	LGALS1	Galectin-1	71641	111292	77455.9	150499	132813	95782.4
P09429	P09429	HMGB1_HUMAN	HMGB1	High mobility group protein B1	84953.5	207667	98027.3	915486	894255	866921
P09467	O00757;P09467	F16P1_HUMAN	FBP1	Fructose-1,6-bisphosphatase 1	1243550	1233020	1206790	824723	802308	572831
P09471;P09471-2	P04899;P08754;P09471;P63096;P04899-2;P04899-3;P04899-4;P04899-5;P04899-6;P09471-2;P63096-2	GNAO_HUMAN	GNAO1	Guanine nucleotide-binding protein G(o) subunit alpha	263300	261203	262205	266835	261609	231359
P09496;P09496-2;P09496-3;P09496-4	P09496;P09496-2;P09496-3;P09496-4	CLCA_HUMAN	CLTA	Clathrin light chain A	25851.8	44199.6	25660.1	79069.1	69603.3	78623.1
P09525;P09525-2;P09525-3	P09525;P09525-2;P09525-3	ANXA4_HUMAN	ANXA4	Annexin A4	39450.6	49543.8	37492	87496	99032.2	44933.3
P09543;P09543-2	P09543;P09543-2	CN37_HUMAN	CNP	2',3'-cyclic-nucleotide 3'-phosphodiesterase	22435.4	27733.4	25390.3	18354.8	15675.7	25542.7
P09622	P09622;P09622-2;P09622-3	DLDH_HUMAN	DLD	Dihydrolipoyl dehydrogenase, mitochondrial	144684	148309	130422	82665.5	70477.5	85920.6
P09651;P09651-2;P09651-3	P09651;Q32P51;P09651-2;P09651-3	ROA1_HUMAN	HNRNPA1	Heterogeneous nuclear ribonucleoprotein A1	530743	634709	480305	2099020	1977310	2146990
P09661	P09661	RU2A_HUMAN	SNRPA1	U2 small nuclear ribonucleoprotein A'	80177.8	97664.4	81760.7	90373.4	89322.4	81212
P09960;P09960-4	P09960;P09960-4	LKHA4_HUMAN	LTA4H	Leukotriene A-4 hydrolase	318363	305703	299053	185067	202420	145460
P09972	P09972	ALDOC_HUMAN	ALDOC	Fructose-bisphosphate aldolase C	469905	495200	426780	347625	388868	291617
P0C0S5;Q71UI9	P04908;P0C0S5;P0C0S8;P16104;P20671;Q16777;Q6FI13;Q71UI9;Q7L7L0;Q93077;Q96KK5;Q96QV6;Q99878;Q9BTM1;Q71UI9-2;Q71UI9-3;Q71UI9-4;Q9BTM1-2	H2AV_HUMAN;H2AZ_HUMAN	H2AZ1;H2AZ2	Histone H2A.Z	571064	615103	498507	853363	701822	656190
P0CG47;P0CG48;P62979;P62987	P0CG47;P0CG48;P62979;P62987	RL40_HUMAN;RS27A_HUMAN;UBB_HUMAN;UBC_HUMAN	RPS27A;UBA52;UBB;UBC	Polyubiquitin-B	148946000	145936000	158313000	165302000	204627000	127519000
P0DMM9;P0DMM9-3;P0DMN0;P50225;P50225-2;P50226	P0DMM9;P0DMN0;P50225;P50226;P0DMM9-3;P50225-2	ST1A1_HUMAN;ST1A2_HUMAN;ST1A3_HUMAN;ST1A4_HUMAN	SULT1A1;SULT1A2;SULT1A3;SULT1A4	Sulfotransferase 1A3				10333.9	21938.3	36461
P0DMV8;P0DMV9	P0DMV8;P0DMV9;P17066;P48741;P0DMV8-2	HS71A_HUMAN;HS71B_HUMAN	HSPA1A;HSPA1B	Heat shock 70 kDa protein 1A	7908640	9316590	7766400	8549210	8588090	6999780
P0DP23;P0DP24;P0DP25	P0DP23;P0DP24;P0DP25;P27482	CALM1_HUMAN;CALM2_HUMAN;CALM3_HUMAN	CALM1;CALM2;CALM3	Calmodulin-1	46398.2	106165	44681.2	68637.9	48491.4	42953
P0DPD7;P0DPD8	P0DPD7;P0DPD8	EFCE2_HUMAN;EFMT4_HUMAN	EEF1AKMT4;EEF1AKMT4-ECE2	EEF1A lysine methyltransferase 4	64530.9	70552.1	69826.8	36757.9	32493.9	31077.1
P10155;P10155-3;P10155-4;P10155-5	P10155;P10155-3;P10155-4;P10155-5	RO60_HUMAN	RO60	RNA-binding protein RO60	46012.6	55323.4	47711.2	60918.4	46881	39882.6
P10253	P10253	LYAG_HUMAN	GAA	Lysosomal alpha-glucosidase	43034.4	48314.2	37337.2	57946.1
P10321;P10321-2	P10321;P10321-2	HLAC_HUMAN	HLA-C	HLA class I histocompatibility antigen, C alpha chain	35498	33264.7	35287	21330.8		29440.5
P10412;P16402;P16403;P22492;Q02539	P10412;P16402;P16403;P22492;Q02539	H11_HUMAN;H12_HUMAN;H13_HUMAN;H14_HUMAN;H1T_HUMAN	H1-1;H1-2;H1-3;H1-4;H1-6	Histone H1.4	37484.5	35978.3	42735.2	55310	47076.3	32054.1
P10515	P10515	ODP2_HUMAN	DLAT	Dihydrolipoyllysine-residue acetyltransferase component of pyruvate dehydrogenase complex, mitochondrial	44577.8	43876.9	83615.5	59164.3	90610.4	48756.9
P10586;P10586-2	P10586;P23468;Q13332;P10586-2;P23468-2;P23468-3;P23468-4;P23468-5;P23468-6;P23468-7;Q13332-2;Q13332-3;Q13332-4;Q13332-5;Q13332-6;Q13332-7	PTPRF_HUMAN	PTPRF	Receptor-type tyrosine-protein phosphatase F	117839	100214	103944	58680.9	74285.7	52573
P10599	P10599;P10599-2	THIO_HUMAN	TXN	Thioredoxin	519344	661170	592303	618330	563638	458355
P10636;P10636-2;P10636-3;P10636-4;P10636-5;P10636-6;P10636-7;P10636-8;P10636-9	P10636;P10636-8;P10636-6;P10636-2;P10636-3;P10636-4;P10636-5;P10636-7;P10636-9	TAU_HUMAN	MAPT	Microtubule-associated protein tau		41675	26752.5	114865	94404.5	83538.3
P10644;P10644-2	P10644;P10644-2	KAP0_HUMAN	PRKAR1A	cAMP-dependent protein kinase type I-alpha regulatory subunit		75130.7	46264	147292	166152	185606
P10746	P10746	HEM4_HUMAN	UROS	Uroporphyrinogen-III synthase			6426.56	21171.8		31724.7
P10768	P10768	ESTD_HUMAN	ESD	S-formylglutathione hydrolase	93661.2	109427	64483.2	437259	410676	472941
P10809	P10809	CH60_HUMAN	HSPD1	60 kDa heat shock protein, mitochondrial	169370	272916	165643	1579170	1616310	2628350
P10915	P10915	HPLN1_HUMAN	HAPLN1	Hyaluronan and proteoglycan link protein 1	11569.1	11098.3	14102.2	27869.2	38366.8	17778.2
P11021	P11021	BIP_HUMAN	HSPA5	Endoplasmic reticulum chaperone BiP	604317	698746	587778	888061	813920	671800
P11142	P11142;P11142-2	HSP7C_HUMAN	HSPA8	Heat shock cognate 71 kDa protein	4192120	5119690	4143090	5386070	4999490	3862590
P11166	P11166	GTR1_HUMAN	SLC2A1	Solute carrier family 2, facilitated glucose transporter member 1	48462	49939.8	61358.4	47544.8	48678.9	27910
P11172	P11172;P11172-3	UMPS_HUMAN	UMPS	Uridine 5'-monophosphate synthase	67400.4	67417.6	59617.3	106203	109813	164913
P11177;P11177-2;P11177-3	P11177;P11177-2;P11177-3	ODPB_HUMAN	PDHB	Pyruvate dehydrogenase E1 component subunit beta, mitochondrial	39652	33010.8	33566.7	23992.9	36282.1	29522.2
P11216	P06737;P11216;P11217;P06737-2;P11217-2	PYGB_HUMAN	PYGB	Glycogen phosphorylase, brain form	264244	307341	288237	236220	249963	211329
P11234;P11234-2;P11234-3	P11233;P11234;P11234-2;P11234-3	RALB_HUMAN	RALB	Ras-related protein Ral-B	24692.3	27220.1	27365.5		14455
P11274;P11274-2;Q12979;Q12979-2;Q12979-4	P11274;Q12979;P11274-2;Q12979-2;Q12979-4	ABR_HUMAN;BCR_HUMAN	ABR;BCR	Breakpoint cluster region protein			19019.4			21276.6
P11413;P11413-2;P11413-3	P11413;P11413-2;P11413-3	G6PD_HUMAN	G6PD	Glucose-6-phosphate 1-dehydrogenase	2021790	2140940	1993050	1323380	1264180	1034790
P11498	P11498;P11498-2	PYC_HUMAN	PC	Pyruvate carboxylase, mitochondrial	161090	162322	160493	165574	152954	165421
P11586	P11586	C1TC_HUMAN	MTHFD1	C-1-tetrahydrofolate synthase, cytoplasmic	312470	365072	304557	625466	610934	917836
P11766	P11766	ADHX_HUMAN	ADH5	Alcohol dehydrogenase class-3	347443	348026	335125	322250	282082	217216
P11802	P11802	CDK4_HUMAN	CDK4	Cyclin-dependent kinase 4	310375	257998	312158	125813	177117	171627
P11908;P11908-2	P11908;P21108;P60891;P11908-2;P60891-2	PRPS2_HUMAN	PRPS2	Ribose-phosphate pyrophosphokinase 2	76780.8	66103.6	67762.3	94323.5	131585	114973
P11940;P11940-2	P11940;Q9H361;P11940-2	PABP1_HUMAN	PABPC1	Polyadenylate-binding protein 1	251331	292570	262252	457340	448158	471376
P12004	P12004	PCNA_HUMAN	PCNA	Proliferating cell nuclear antigen	1186590	1317160	1311650	1247710	1246540	1419530
P12081;P12081-4	P12081;P49590;P12081-2;P12081-3;P12081-4;P49590-2	HARS1_HUMAN	HARS1	Histidine--tRNA ligase, cytoplasmic	191689	196129	188484	145569	145992	101407
P12268	P12268	IMDH2_HUMAN	IMPDH2	Inosine-5'-monophosphate dehydrogenase 2	236664	219056	188852	376992	387368	440853
P12429	P12429	ANXA3_HUMAN	ANXA3	Annexin A3	21072.9	33538.2	33730.6	34460	36683.9	26259
P12694;P12694-2	P12694;P12694-2	ODBA_HUMAN	BCKDHA	2-oxoisovalerate dehydrogenase subunit alpha, mitochondrial	67508.3	57554.2	66737.7		31009.4	28938.2
P12814;P12814-3	P12814;P35609;P12814-2;P12814-3;P12814-4;P35609-2	ACTN1_HUMAN	ACTN1	Alpha-actinin-1	88662.7	135083	102039	504333	549351	433728
P12830;P12830-2	P12830;P12830-2	CADH1_HUMAN	CDH1	Cadherin-1	94751.4	85153.1	61021.9	87786.2	83556.3	95495.6
P12956	P12956;P12956-2	XRCC6_HUMAN	XRCC6	X-ray repair cross-complementing protein 6	193962	194275	200946	191126	183334	174599
P13010	P13010	XRCC5_HUMAN	XRCC5	X-ray repair cross-complementing protein 5	149235	153226	135821	128407	141643	127206
P13051;P13051-2	P13051;P13051-2	UNG_HUMAN	UNG	Uracil-DNA glycosylase	27676.3	27564.2	35890.6	14955.2	16528.1	31820.1
P13473;P13473-2;P13473-3	P13473;P13473-2;P13473-3	LAMP2_HUMAN	LAMP2	Lysosome-associated membrane glycoprotein 2	91337.9	99884.3	103204	29269.2	28223	30282
P13489	P13489	RINI_HUMAN	RNH1	Ribonuclease inhibitor	521258	550623	548260	280406	326020	394378
P13639	P13639	EF2_HUMAN	EEF2	Elongation factor 2	1320010	1401040	1353580	1333960	1402940	1260160
P13645	P13645	K1C10_HUMAN	KRT10	Keratin, type I cytoskeletal 10	1610630	1751800	1773150	4278780	3264670	3155850
P13647	P13647	K2C5_HUMAN	KRT5	Keratin, type II cytoskeletal 5	214771	241014	304975	809975	425080	356871
P13667	P13667	PDIA4_HUMAN	PDIA4	Protein disulfide-isomerase A4	756924	878662	791797	621840	633662	478365
P13674	P13674;P13674-2;P13674-3	P4HA1_HUMAN	P4HA1	Prolyl 4-hydroxylase subunit alpha-1	191831	193773	199189	80461.5	88557.6	145534
P13693	P13693;P13693-2;Q56UQ5	TCTP_HUMAN	TPT1	Translationally-controlled tumor protein	41950.5	72334.6	44554.5	238269	198627	186615
P13716;P13716-2	P13716;P13716-2	HEM2_HUMAN	ALAD	Delta-aminolevulinic acid dehydratase	34127.7	38879.2	44180.9	62777.7	44174.9	47713
P13796	P13796	PLSL_HUMAN	LCP1	Plastin-2	34471.9	19935.4	38772.2	117483	140987	87869
P13798	P13798	ACPH_HUMAN	APEH	Acylamino-acid-releasing enzyme	614416	566425	605529	462985	436450	305736
P13804;P13804-2	P13804;P13804-2	ETFA_HUMAN	ETFA	Electron transfer flavoprotein subunit alpha, mitochondrial	293651	333930	302705	188552	182713	211159
P13807;P13807-2	P13807;P13807-2	GYS1_HUMAN	GYS1	Glycogen [starch] synthase, muscle	36572.8	44914.4	36866.7	56120.4	45327.6	56160.2
P13861;P13861-2	P13861;P31323;P13861-2	KAP2_HUMAN	PRKAR2A	cAMP-dependent protein kinase type II-alpha regulatory subunit	17322.5	19835.2	36231.7	41530.8	56531.5	51340.1
P14314;P14314-2	P14314;P14314-2	GLU2B_HUMAN	PRKCSH	Glucosidase 2 subunit beta	176768	239315	161099	130669	83709.1	130586
P14324;P14324-2	P14324;P14324-2	FPPS_HUMAN	FDPS	Farnesyl pyrophosphate synthase	100485	98744.1	86214.1	65904.4	65618.3	74562.2
P14550	P14550	AK1A1_HUMAN	AKR1A1	Aldo-keto reductase family 1 member A1	48286.3	53472.4	46048.7	62477.7	59772.8	74707.8
P14618	P14618;P14618-2;P14618-3	KPYM_HUMAN	PKM	Pyruvate kinase PKM	7415490	7432410	7597130	5631220	5817290	5189200
P14618-2	P14618-2	KPYM_HUMAN	PKM	Isoform M1 of Pyruvate kinase PKM	24077	15282.5	19437.8	26877.7	23264.4
P14625	P14625;Q58FF3	ENPL_HUMAN	HSP90B1	Endoplasmin	844907	927678	865409	1690740	1608580	1375490
P14735	P14735;P14735-2	IDE_HUMAN	IDE	Insulin-degrading enzyme	161316	162508	157618	216692	218981	181776
P14866	P14866	HNRPL_HUMAN	HNRNPL	Heterogeneous nuclear ribonucleoprotein L	579568	673889	764489	1069550	896253	1233110
P14868	P14868	SYDC_HUMAN	DARS1	Aspartate--tRNA ligase, cytoplasmic	720637	659546	683966	554065	558473	456708
P14923	P14923	PLAK_HUMAN	JUP	Junction plakoglobin	23923.6	24370.1	26750.8	93644.7	69009.5	74461.1
P15104	P15104	GLNA_HUMAN	GLUL	Glutamine synthetase	193244	194770	185267	201286	161509	117268
P15121	P15121	ALDR_HUMAN	AKR1B1	Aldo-keto reductase family 1 member B1	25383.8	29207.7	27830	71553	62298.6	49959.2
P15153;P60763;P63000;P63000-2	P15153;P60763;P63000;P63000-2	RAC1_HUMAN;RAC2_HUMAN;RAC3_HUMAN	RAC1;RAC2;RAC3	Ras-related C3 botulinum toxin substrate 2	478705	467524	457754	349763	325357	328655
P15170-2;P15170-3	P15170;P15170-2;P15170-3	ERF3A_HUMAN	GSPT1	Isoform 2 of Eukaryotic peptide chain release factor GTP-binding subunit ERF3A	213622	222378	242878	397224	417262	433798
P15311	P15311	EZRI_HUMAN	EZR	Ezrin	100455	138817	104508	111715	104538	66933
P15374	P15374	UCHL3_HUMAN	UCHL3	Ubiquitin carboxyl-terminal hydrolase isozyme L3	3645760	3459280	3822600	278740	296702	155425
P15531;P15531-2	P15531;P15531-2	NDKA_HUMAN	NME1	Nucleoside diphosphate kinase A	413494	473463	368111	905181	856417	591402
P15559;P15559-2;P15559-3	P15559;P15559-2;P15559-3	NQO1_HUMAN	NQO1	NAD(P)H dehydrogenase [quinone] 1	2222850	1941460	2178210	1270640	1606720	1159750
P15586;P15586-2	P15586;P15586-2	GNS_HUMAN	GNS	N-acetylglucosamine-6-sulfatase	40207.8	41803.2	33993.6	20158.1		15938.8
P15735;P15735-2	P15735;P15735-2	PHKG2_HUMAN	PHKG2	Phosphorylase b kinase gamma catalytic chain, liver/testis isoform	15638.4	15879.4	12466.7	32566.4	37775.1	44603.7
P15880	P15880	RS2_HUMAN	RPS2	Small ribosomal subunit protein uS5	45964.9	46567.8	54645.2	66267.5	71025.8	36162.8
P15924	P15924;P15924-2;P15924-3	DESP_HUMAN	DSP	Desmoplakin	80529.5	78733.6	89265.8	296316	196911	376408
P16144;P16144-2;P16144-3;P16144-4	P16144;P16144-2;P16144-3;P16144-4	ITB4_HUMAN	ITGB4	Integrin beta-4	24929.4	13114.7	24263.3	10154.8	60201.1
P16152	P16152;P16152-2	CBR1_HUMAN	CBR1	Carbonyl reductase [NADPH] 1	1075180	1121330	1006880	554299	585279	428149
P16278;P16278-3	P16278;P16278-2;P16278-3	BGAL_HUMAN	GLB1	Beta-galactosidase	143977	125921	132807	92726.1	88640.1	36945.7
P16435	P16435	NCPR_HUMAN	POR	NADPH--cytochrome P450 reductase	520128	399950	470768	362142	376465	323613
P16455	P16455	MGMT_HUMAN	MGMT	Methylated-DNA--protein-cysteine methyltransferase				122058	169636	178599
P16615;P16615-2;P16615-3;P16615-4;P16615-5	P16615;P16615-2;P16615-3;P16615-4;P16615-5	AT2A2_HUMAN	ATP2A2	Sarcoplasmic/endoplasmic reticulum calcium ATPase 2	120557	148085	145503	92884.4	75377.1	127062
P16885	P16885	PLCG2_HUMAN	PLCG2	1-phosphatidylinositol 4,5-bisphosphate phosphodiesterase gamma-2	86433.2	83503.9	95837.2	187433	177364	138838
P16949;P16949-2	P16949;P16949-2	STMN1_HUMAN	STMN1	Stathmin	26149.7	118820	42241.6	63450.6	80617.5	40192.7
P16989;P16989-3	P16989;P16989-3	YBOX3_HUMAN	YBX3	Y-box-binding protein 3	105838	111769	115018	131981	117612	83522
P17174	P17174	AATC_HUMAN	GOT1	Aspartate aminotransferase, cytoplasmic	286297	306190	263498	169840	159809	138477
P17612;P17612-2	P17612;P17612-2	KAPCA_HUMAN	PRKACA	cAMP-dependent protein kinase catalytic subunit alpha	113380	112029	117823	52961.3	37389.4	44074
P17655;P17655-2	P17655;P17655-2	CAN2_HUMAN	CAPN2	Calpain-2 catalytic subunit	51340.4	41314.3	48110.8	25429	23287.3	29460.4
P17812	P17812;P17812-2	PYRG1_HUMAN	CTPS1	CTP synthase 1	99373.4	114656	104205	121816	101188	130288
P17844;P17844-2	P17844;P17844-2	DDX5_HUMAN	DDX5	Probable ATP-dependent RNA helicase DDX5	452654	518321	523711	368862	325349	448166
P17858	P08237;P17858;P08237-3;P17858-2	PFKAL_HUMAN	PFKL	ATP-dependent 6-phosphofructokinase, liver type	408144	398609	428638	397735	428219	473418
P17931	P17931	LEG3_HUMAN	LGALS3	Galectin-3	376572	502201	439678	866319	802854	667854
P17980	P17980	PRS6A_HUMAN	PSMC3	26S proteasome regulatory subunit 6A	87533.4	92527.6	116372	161507	143244	171038
P17987	P17987	TCPA_HUMAN	TCP1	T-complex protein 1 subunit alpha	670203	670880	755234	597001	687824	506974
P18031	P18031	PTN1_HUMAN	PTPN1	Tyrosine-protein phosphatase non-receptor type 1	17704.6	45919.6		131070	162710	213151
P18077	P18077	RL35A_HUMAN	RPL35A	Large ribosomal subunit protein eL33	169148	154015	228968	137968	171192	100908
P18085	P18085	ARF4_HUMAN	ARF4	ADP-ribosylation factor 4	2570380	2541580	2144890	1593530	1956970	1738630
P18124	P18124	RL7_HUMAN	RPL7	Large ribosomal subunit protein uL30	258197	284450	313400	225770	205323	140399
P18206;P18206-2	P18206;P18206-2;P18206-3	VINC_HUMAN	VCL	Vinculin				10761.5		36969.4
P18440	P18440	ARY1_HUMAN	NAT1	Arylamine N-acetyltransferase 1	32497.2	53720.2	40403	17532.7	12893.2	16646.1
P18583;P18583-10;P18583-3;P18583-4;P18583-5;P18583-6;P18583-7;P18583-9	P18583;P18583-10;P18583-3;P18583-4;P18583-5;P18583-6;P18583-7;P18583-9	SON_HUMAN	SON	Protein SON	87944.8	101481	83769.5	81722	92479.6	83534.6
P18621;P18621-3	P18621;P18621-3	RL17_HUMAN	RPL17	Large ribosomal subunit protein uL22	391439	379659	376863	404439	372562	305368
P18669	P15259;P18669	PGAM1_HUMAN	PGAM1	Phosphoglycerate mutase 1	469066	582497	501040	575090	599276	456615
P18754;P18754-2	P18754;P18754-2	RCC1_HUMAN	RCC1	Regulator of chromosome condensation	376019	384565	370145	274398	240110	321320
P19013	P19013	K2C4_HUMAN	KRT4	Keratin, type II cytoskeletal 4			58648.6	151554	39055.8	22611.6
P19174;P19174-2	P19174;P19174-2	PLCG1_HUMAN	PLCG1	1-phosphatidylinositol 4,5-bisphosphate phosphodiesterase gamma-1	105205	84865.1	80239.4	50831.4	50360.3	78349.4
P19338	P19338	NUCL_HUMAN	NCL	Nucleolin	527858	642868	553692	1392310	1299110	1043130
P19367;P19367-2;P19367-3;P19367-4	P19367;P19367-2;P19367-3;P19367-4	HXK1_HUMAN	HK1	Hexokinase-1	134660	149581	143442	161645	164457	188094
P19387	P19387	RPB3_HUMAN	POLR2C	DNA-directed RNA polymerase II subunit RPB3	49930.8	52553.2	48933.7	29564.8	32529.4	35064
P19474	P19474	RO52_HUMAN	TRIM21	E3 ubiquitin-protein ligase TRIM21	46962.6	51709.7	36761.2	35689.6	34333.8	52981.9
P19525;P19525-2	P19525;P19525-2	E2AK2_HUMAN	EIF2AK2	Interferon-induced, double-stranded RNA-activated protein kinase	105052	123502	120049	84034.5	80102.7	148394
P19623	P19623	SPEE_HUMAN	SRM	Spermidine synthase	401724	395253	391162	480544	527393	329556
P19784	P19784	CSK22_HUMAN	CSNK2A2	Casein kinase II subunit alpha'	85877.6	87604.5	93936.4	46803.8	49486.9	38534.5
P19793;P19793-2	P19793;P19793-2	RXRA_HUMAN	RXRA	Retinoic acid receptor RXR-alpha					26958.5	46198.4
P19838;P19838-2	P19838;P19838-2	NFKB1_HUMAN	NFKB1	Nuclear factor NF-kappa-B p105 subunit				68243.5	70734.9	79611.2
P20042	P20042	IF2B_HUMAN	EIF2S2	Eukaryotic translation initiation factor 2 subunit 2		16416.1	25802.3	69162.9	55588.4	45239.4
P20073;P20073-2	P20073;P20073-2	ANXA7_HUMAN	ANXA7	Annexin A7	69991	61596.6	65553.9	204635	234171	353272
P20339;P20339-2	P20339;P51148;P61020;P51148-2;P20339-2;P61020-2	RAB5A_HUMAN	RAB5A	Ras-related protein Rab-5A	270164	243707	264416	140042	165922	137948
P20340;P20340-2	P20340;Q9NRW1;P20340-2;P20340-4;Q9NRW1-2	RAB6A_HUMAN	RAB6A	Ras-related protein Rab-6A	928441	828409	1074500	623245	810311	655611
P20618	P20618	PSB1_HUMAN	PSMB1	Proteasome subunit beta type-1	694004	709242	747023	331510	307301	210626
P20645	P20645	MPRD_HUMAN	M6PR	Cation-dependent mannose-6-phosphate receptor	73588.5	53878.9	69592.1
P20700	P20700	LMNB1_HUMAN	LMNB1	Lamin-B1	94801.1	99427	101437	189855	176387	239450
P20930	P20930	FILA_HUMAN	FLG	Filaggrin				146487		68267.3
P21266	P21266	GSTM3_HUMAN	GSTM3	Glutathione S-transferase Mu 3	242793	273610	259896	591522	687761	673668
P21281	P21281	VATB2_HUMAN	ATP6V1B2	V-type proton ATPase subunit B, brain isoform	68691.1	56508	67807.4	39280.5	60117.1	50166.4
P21283	P21283	VATC1_HUMAN	ATP6V1C1	V-type proton ATPase subunit C 1			9986.83	26388.2	39083.5	45204.4
P21291	P21291	CSRP1_HUMAN	CSRP1	Cysteine and glycine-rich protein 1	65474.4	107827	93032.6	489043	430981	515810
P21333;P21333-2	P21333;P21333-2	FLNA_HUMAN	FLNA	Filamin-A	270454	365418	250411	1300090	1330700	2309790
P21399	P21399	ACOHC_HUMAN	ACO1	Cytoplasmic aconitate hydratase	157297	152815	180395	133875	126581	110018
P21796	P21796	VDAC1_HUMAN	VDAC1	Voltage-dependent anion-selective channel protein 1	251435	265079	365147	164157	240327	144289
P22033	P22033	MUTA_HUMAN	MMUT	Methylmalonyl-CoA mutase, mitochondrial	76825.4	61042.7	58588.5	61723.9	50289.5	49500.1
P22059	P22059	OSBP1_HUMAN	OSBP	Oxysterol-binding protein 1	216704	212591	220804	134929	139023	190584
P22061;P22061-2	P22061;P22061-2	PIMT_HUMAN	PCMT1	Protein-L-isoaspartate(D-aspartate) O-methyltransferase	88938.7	133514	100194	139190	125467	126962
P22102	P22102	PUR2_HUMAN	GART	Trifunctional purine biosynthetic protein adenosine-3	297163	301910	299800	240078	246447	231110
P22234;P22234-2	P22234;P22234-2	PUR6_HUMAN	PAICS	Bifunctional phosphoribosylaminoimidazole carboxylase/phosphoribosylaminoimidazole succinocarboxamide synthetase	239100	273088	252565	321169	338480	354831
P22307;P22307-4;P22307-7;P22307-8	P22307;P22307-2;P22307-4;P22307-6;P22307-7;P22307-8	SCP2_HUMAN	SCP2	Sterol carrier protein 2	11684	16889.9	17981.5	127385	71996	65053.6
P22314;P22314-2	P22314;P22314-2	UBA1_HUMAN	UBA1	Ubiquitin-like modifier-activating enzyme 1	285895	320614	296276	503194	481497	535501
P22392-2	P15531;P22392-2;P15531-2	NDKB_HUMAN	NME2	Isoform 3 of Nucleoside diphosphate kinase B	594855	764947	581912	1576170	1529360	972851
P22413	P22413	ENPP1_HUMAN	ENPP1	Ectonucleotide pyrophosphatase/phosphodiesterase family member 1				64855.4	63722.6	45732.9
P22570;P22570-2;P22570-3;P22570-4;P22570-5;P22570-7	P22570;P22570-2;P22570-3;P22570-4;P22570-5;P22570-6;P22570-7	ADRO_HUMAN	FDXR	NADPH:adrenodoxin oxidoreductase, mitochondrial	68590.2	58059.1	49725.2	39514.8	33687.6	49996
P22626	P22626;P22626-2	ROA2_HUMAN	HNRNPA2B1	Heterogeneous nuclear ribonucleoproteins A2/B1	2202280	2237280	2232440	4019340	3614180	3072570
P22695	P22695	QCR2_HUMAN	UQCRC2	Cytochrome b-c1 complex subunit 2, mitochondrial	45875.7	51934.1	62950.4	41096.1	42310.7	28166.2
P23193	P23193	TCEA1_HUMAN	TCEA1	Transcription elongation factor A protein 1				61257.4	52543.8	96214
P23258	P23258;Q9NRH3	TBG1_HUMAN	TUBG1	Tubulin gamma-1 chain	140524	130893	152079	94934.4	79937.1	83511.4
P23284	P23284	PPIB_HUMAN	PPIB	Peptidyl-prolyl cis-trans isomerase B	307118	277833	288575	262002	301832	231096
P23381	P23381;P23381-2	SYWC_HUMAN	WARS1	Tryptophan--tRNA ligase, cytoplasmic	315616	289103	277217	323063	273270	193161
P23396	P23396;P23396-2	RS3_HUMAN	RPS3	Small ribosomal subunit protein uS3	494383	521861	609914	450988	488402	349071
P23443;P23443-2;P23443-3;P23443-5	P23443;P23443-4;P23443-2;P23443-3;P23443-5	KS6B1_HUMAN	RPS6KB1	Ribosomal protein S6 kinase beta-1	376777	397385	380709	494510	472556	741110
P23526	P23526;P23526-2	SAHH_HUMAN	AHCY	Adenosylhomocysteinase	182872	191170	195124	701204	717368	457537
P23528	P23528;Q9Y281;Q9Y281-3	COF1_HUMAN	CFL1	Cofilin-1	801116	1283550	793394	2655180	2492960	2486800
P23919;P23919-2	P23919;P23919-2	KTHY_HUMAN	DTYMK	Thymidylate kinase	55832.3	82864.8	57517.7	238686	231969	406080
P23921	P23921	RIR1_HUMAN	RRM1	Ribonucleoside-diphosphate reductase large subunit	148309	149433	151596	172981	198386	198120
P24534	P24534	EF1B_HUMAN	EEF1B2	Elongation factor 1-beta	150600	188897	137133	186554	177497	166869
P24666	P24666;P24666-4	PPAC_HUMAN	ACP1	Low molecular weight phosphotyrosine protein phosphatase	38540.7	64295	56242	409249	381132	463151
P24752	P24752	THIL_HUMAN	ACAT1	Acetyl-CoA acetyltransferase, mitochondrial	17568.3	29937.1	12655.7	55501.4	56464.6	70615.3
P24855	P24855	DNAS1_HUMAN	DNASE1	Deoxyribonuclease-1	48312.8	69577.3	60936.4	55516	30810.7	39754.8
P24928	P24928;P24928-2	RPB1_HUMAN	POLR2A	DNA-directed RNA polymerase II subunit RPB1	134105	136538	136074	74837.3	78531.8	63782.4
P24941;P24941-2	P24941;P24941-2	CDK2_HUMAN	CDK2	Cyclin-dependent kinase 2	7768.07	17167.9	14195.4	22859.1	28831.2	59562
P25098	P25098;P35626	ARBK1_HUMAN	GRK2	Beta-adrenergic receptor kinase 1	48966.8	54879.6	47157	72485.7	57878.5	79408
P25205;P25205-2	P25205;P25205-2	MCM3_HUMAN	MCM3	DNA replication licensing factor MCM3	271463	283566	279215	255189	262949	339271
P25311	P25311	ZA2G_HUMAN	AZGP1	Zinc-alpha-2-glycoprotein				66923.3	40288.9
P25325;P25325-2	P25325;P25325-2	THTM_HUMAN	MPST	3-mercaptopyruvate sulfurtransferase	52678.8	41334.1	40004.9	123561	167911	142834
P25398	P25398	RS12_HUMAN	RPS12	Small ribosomal subunit protein eS12	202781	264605	227450	632704	524868	459233
P25490	P25490	TYY1_HUMAN	YY1	Transcriptional repressor protein YY1	51532.7	47576.9	63192.3	59808.4	69064.4	82591.3
P25685	P25685;P25685-2	DNJB1_HUMAN	DNAJB1	DnaJ homolog subfamily B member 1	23022	31549.4	35183.9	179812	193826	281458
P25705;P25705-2	P25705;P25705-2	ATPA_HUMAN	ATP5F1A	ATP synthase subunit alpha, mitochondrial	348751	339011	320938	352063	310945	295265
P25786;P25786-2	P25786;P25786-2	PSA1_HUMAN	PSMA1	Proteasome subunit alpha type-1	237755	291032	247697	449465	506540	342433
P25787	P25787	PSA2_HUMAN	PSMA2	Proteasome subunit alpha type-2	236430	208323	223359	150478	213235	121588
P25788;P25788-2	P25788;P25788-2	PSA3_HUMAN	PSMA3	Proteasome subunit alpha type-3	272549	298327	280569	220539	240955	156078
P25789	P25789;P25789-2	PSA4_HUMAN	PSMA4	Proteasome subunit alpha type-4	370333	348921	414804	352170	394024	265813
P26196	P26196	DDX6_HUMAN	DDX6	Probable ATP-dependent RNA helicase DDX6	84413.7	108120	93364	141270	129592	178318
P26358;P26358-2;P26358-3	P26358;P26358-2;P26358-3	DNMT1_HUMAN	DNMT1	DNA (cytosine-5)-methyltransferase 1	40842.2	56904.9	54330.3	49396.1	62002.7	42360.6
P26368;P26368-2	P26368;P26368-2	U2AF2_HUMAN	U2AF2	Splicing factor U2AF 65 kDa subunit	12278.7	21841.4	19714	35906.4	43929.5	33711.9
P26373	P26373	RL13_HUMAN	RPL13	Large ribosomal subunit protein eL13	219961	221974	222190	241366	235952	158435
P26440;P26440-2	P26440;P26440-2	IVD_HUMAN	IVD	Isovaleryl-CoA dehydrogenase, mitochondrial				31518.6	38328.9	34884.9
P26583	P26583	HMGB2_HUMAN	HMGB2	High mobility group protein B2		19511.3		87688.9	71812.9	78810.4
P26599;P26599-1;P26599-2	P26599;P26599-1;P26599-2	PTBP1_HUMAN	PTBP1	Polypyrimidine tract-binding protein 1	122438	214634	165737	441037	443451	589201
P26639;P26639-2	A2RTX5;P26639;A2RTX5-2;P26639-2	SYTC_HUMAN	TARS1	Threonine--tRNA ligase 1, cytoplasmic	394676	354474	408164	357768	379292	266476
P26640	P26640	SYVC_HUMAN	VARS1	Valine--tRNA ligase	119384	136572	117601	210030	191487	228563
P26641;P26641-2	P26641;P26641-2	EF1G_HUMAN	EEF1G	Elongation factor 1-gamma	830921	850534	786535	882755	854669	832280
P27348	P27348	1433T_HUMAN	YWHAQ	14-3-3 protein theta	224296	116272	170018	388980	304355	373220
P27361	P27361;P27361-3	MK03_HUMAN	MAPK3	Mitogen-activated protein kinase 3	65842	80001.1	70121.9	177486	150091	268199
P27635	P27635;Q96L21	RL10_HUMAN	RPL10	Large ribosomal subunit protein uL16	1087930	1106550	1210710	901177	853754	563598
P27694	P27694	RFA1_HUMAN	RPA1	Replication protein A 70 kDa DNA-binding subunit	213476	167197	198890	127653	142598	161794
P27695	P27695	APEX1_HUMAN	APEX1	DNA-(apurinic or apyrimidinic site) endonuclease	207134	250380	215004	128596	143663	132910
P27707	P27707	DCK_HUMAN	DCK	Deoxycytidine kinase	114305	106936	114246	103425	81312.8	85501.5
P27708	P27708	PYR1_HUMAN	CAD	CAD protein	290575	303915	325986	414194	424705	332060
P27797	P27797	CALR_HUMAN	CALR	Calreticulin	939479	1044860	876546	1152320	1103290	787833
P27816;P27816-2;P27816-4;P27816-6	P27816;P27816-2;P27816-4;P27816-6	MAP4_HUMAN	MAP4	Microtubule-associated protein 4	55693.7	91982.7	91231.3	87554.5	93745.1	60890.8
P27824;P27824-2	P27824;P27824-2;P27824-3	CALX_HUMAN	CANX	Calnexin	222937	256372	214433	376385	360632	443240
P27986;P27986-4	P27986;P27986-4	P85A_HUMAN	PIK3R1	Phosphatidylinositol 3-kinase regulatory subunit alpha				28775.4	27780.2	32251
P28066	P28066;P28066-2	PSA5_HUMAN	PSMA5	Proteasome subunit alpha type-5	277434	282761	282149	261015	267390	237847
P28070	P28070	PSB4_HUMAN	PSMB4	Proteasome subunit beta type-4	342609	315248	311870	276123	288775	198849
P28072	P28072	PSB6_HUMAN	PSMB6	Proteasome subunit beta type-6	155875	181470	119294	581715	544223	458555
P28074	P28074;P28074-3	PSB5_HUMAN	PSMB5	Proteasome subunit beta type-5	597127	524052	711576	454338	598301	355558
P28331;P28331-2;P28331-4;P28331-5	P28331;P28331-2;P28331-3;P28331-4;P28331-5	NDUS1_HUMAN	NDUFS1	NADH-ubiquinone oxidoreductase 75 kDa subunit, mitochondrial	15690.6	22683.9	33209.2	62493	61298.1	63628.4
P28340	P28340	DPOD1_HUMAN	POLD1	DNA polymerase delta catalytic subunit	29577.5	33629.7	35280.3	27771.8	27856.8	27990.9
P28482	P27361;P28482;P31152;Q16659;P27361-2;P27361-3;P28482-2	MK01_HUMAN	MAPK1	Mitogen-activated protein kinase 1	129537	124749	134032	298435	295286	304168
P28676	P28676	GRAN_HUMAN	GCA	Grancalcin				82354.4	71210.6	96409.5
P28827;P28827-2;Q15262;Q15262-2;Q15262-3;Q15262-4	P28827;Q15262;Q15262-2;Q15262-3;Q15262-4;P28827-2	PTPRK_HUMAN;PTPRM_HUMAN	PTPRK;PTPRM	Receptor-type tyrosine-protein phosphatase mu	9701.49	25645	21147.9
P28838;P28838-2	P28838;P28838-2	AMPL_HUMAN	LAP3	Cytosol aminopeptidase	48246.1	54912.4	35691.3	202833	184731	207260
P29144	P29144	TPP2_HUMAN	TPP2	Tripeptidyl-peptidase 2	82290.8	76259.5	90457.4	162540	156981	111759
P29218;P29218-3	P29218;P29218-3;P29218-2	IMPA1_HUMAN	IMPA1	Inositol monophosphatase 1	79216.7	70977.3	73484.6	96728.4	51606	41333.6
P29350;P29350-2;P29350-3	P29350;P29350-2;P29350-3;P29350-4	PTN6_HUMAN	PTPN6	Tyrosine-protein phosphatase non-receptor type 6	48559.4	52635.8	37493	64627.1	74577.7	101931
P29373	P29373	RABP2_HUMAN	CRABP2	Cellular retinoic acid-binding protein 2	61689.1	144691	71782.7	737318	929660	808260
P29401;P29401-2	P29401;P29401-2	TKT_HUMAN	TKT	Transketolase	1524070	1558000	1497250	613031	620350	521778
P29508;P29508-2	P29508;P29508-2	SPB3_HUMAN	SERPINB3	Serpin B3	90984	87505.6	103482	356117	181052	101975
P29692;P29692-2	P29692;P29692-2;P29692-3;P29692-4	EF1D_HUMAN	EEF1D	Elongation factor 1-delta	102556	169194	102560	497920	498071	431299
P29762	P29762	RABP1_HUMAN	CRABP1	Cellular retinoic acid-binding protein 1				117376	117587	135505
P30038;P30038-3	P30038;P30038-3	AL4A1_HUMAN	ALDH4A1	Delta-1-pyrroline-5-carboxylate dehydrogenase, mitochondrial	67255	100548	64088	110941	83285.4	102963
P30040	P30040	ERP29_HUMAN	ERP29	Endoplasmic reticulum resident protein 29	68248.4	92675.1	61727.9	122175	119591	64643.7
P30041	P30041	PRDX6_HUMAN	PRDX6	Peroxiredoxin-6	999310	1010120	1023710	819866	824425	756863
P30043	P30043	BLVRB_HUMAN	BLVRB	Flavin reductase (NADPH)	177727	246509	202518	343043	296670	268440
P30044;P30044-2	P30044;P30044-2;P30044-3	PRDX5_HUMAN	PRDX5	Peroxiredoxin-5, mitochondrial	143544	223220	161520	423368	375953	470596
P30046	P30046;A6NHG4;P30046-2	DOPD_HUMAN	DDT	D-dopachrome decarboxylase	42650.8	65456.2	38902.2	78670	79902.8	41483
P30048;P30048-2	P30048;P30048-2	PRDX3_HUMAN	PRDX3	Thioredoxin-dependent peroxide reductase, mitochondrial	592266	674513	633871	602625	652912	460201
P30050	P30050	RL12_HUMAN	RPL12	Large ribosomal subunit protein uL11	1546980	1609090	1983920	1171930	1053560	836971
P30084	P30084	ECHM_HUMAN	ECHS1	Enoyl-CoA hydratase, mitochondrial	163102	171459	130472	183472	192542	322781
P30085;P30085-3	P30085;P30085-3	KCY_HUMAN	CMPK1	UMP-CMP kinase	123907	155468	161263	174797	158016	143551
P30086	P30086	PEBP1_HUMAN	PEBP1	Phosphatidylethanolamine-binding protein 1	303815	474545	358392	427935	390795	287073
P30101	P30101	PDIA3_HUMAN	PDIA3	Protein disulfide-isomerase A3	97987.8	145755	90776.7	571466	525611	623322
P30153	P30153	2AAA_HUMAN	PPP2R1A	Serine/threonine-protein phosphatase 2A 65 kDa regulatory subunit A alpha isoform	110363	145609	117161	986122	985143	1389880
P30419;P30419-2	P30419;P30419-2	NMT1_HUMAN	NMT1	Glycylpeptide N-tetradecanoyltransferase 1	45960.2	35943.2	39581.9	60378.7	44461.6	55596.9
P30520	P30520	PURA2_HUMAN	ADSS2	Adenylosuccinate synthetase isozyme 2	130437	128351	125221	87175.8	94294.8	56796.5
P30533	P30533	AMRP_HUMAN	LRPAP1	Alpha-2-macroglobulin receptor-associated protein	15129.3	23444.3	12273.2	22821.2	30340.4	3245.97
P30566	P30566	PUR8_HUMAN	ADSL	Adenylosuccinate lyase		8925.93	21580.7	54905.6	80925	29348.1
P30626;P30626-2;P30626-3	P30626;P30626-2;P30626-3	SORCN_HUMAN	SRI	Sorcin	18707.2	19969	9298.23	103366	102759	116873
P30740	P30740	ILEU_HUMAN	SERPINB1	Leukocyte elastase inhibitor	109409	117283	88106.5	105907	108605	69171
P30876	P30876	RPB2_HUMAN	POLR2B	DNA-directed RNA polymerase II subunit RPB2	62264.5	68945.3	70128.4	67878.8	61614.6	40621.2
P31040	P31040	SDHA_HUMAN	SDHA	Succinate dehydrogenase [ubiquinone] flavoprotein subunit, mitochondrial	701448	629628	693702	500852	419899	401426
P31150	P31150	GDIA_HUMAN	GDI1	Rab GDP dissociation inhibitor alpha	94018.4	93801.9	97256	59217	45562.1	29380.7
P31151	P31151	S10A7_HUMAN	S100A7	Protein S100-A7	13644	31845.9	17767.9	79679.8		87533.1
P31153	P31153;P31153-2	METK2_HUMAN	MAT2A	S-adenosylmethionine synthase isoform type-2	441117	405029	393459	273040	282740	244826
P31327;P31327-3	P31327;P31327-3	CPSM_HUMAN	CPS1	Carbamoyl-phosphate synthase [ammonia], mitochondrial				106284	22411.8
P31350;P31350-2	P31350;Q7LG56;P31350-2;Q7LG56-2;Q7LG56-3;Q7LG56-6	RIR2_HUMAN	RRM2	Ribonucleoside-diphosphate reductase subunit M2	107454	114941	119018	71901.8	77029.6	87217.4
P31483-2	P31483;Q01085;Q01085-2;P31483-2;P31483-3	TIA1_HUMAN	TIA1	Isoform Short of Cytotoxic granule associated RNA binding protein TIA1	58866.7	65888.1	56517	167530	159646	143592
P31483;P31483-3	P31483;P31483-3	TIA1_HUMAN	TIA1	Cytotoxic granule associated RNA binding protein TIA1	18775.1	29158.1	25110.1	74655.9	68487.4	78090.7
P31689	P31689	DNJA1_HUMAN	DNAJA1	DnaJ homolog subfamily A member 1	94586.9	110227	105487	248245	236437	303347
P31749	P31749;P31749-2	AKT1_HUMAN	AKT1	RAC-alpha serine/threonine-protein kinase	77896.4	61774.8	94070.3	53960.5	71547.3	57561.4
P31751;P31751-2	P31751;P31751-2	AKT2_HUMAN	AKT2	RAC-beta serine/threonine-protein kinase	19453.4	16230	23483.9	16696.3		14672.5
P31930	P31930	QCR1_HUMAN	UQCRC1	Cytochrome b-c1 complex subunit 1, mitochondrial	20508.8	27463.7	19791.9			13920.1
P31939	P31939;P31939-2	PUR9_HUMAN	ATIC	Bifunctional purine biosynthesis protein ATIC	1027530	958540	940136	698769	693311	669315
P31942-2	P31942;P31942-2;P31942-3;P31942-4;P31942-5;P31942-6	HNRH3_HUMAN	HNRNPH3	Isoform 2 of Heterogeneous nuclear ribonucleoprotein H3	2904890	3128450	3432650	2418800	2311820	1700570
P31943	P31943	HNRH1_HUMAN	HNRNPH1	Heterogeneous nuclear ribonucleoprotein H	1433950	1472080	1444520	2994170	2614220	2956120
P31944	P31944	CASPE_HUMAN	CASP14	Caspase-14	55747.7	63779.4	41831.5	79459.4	65239	83260.6
P31946;P31946-2	P31946;P31946-2	1433B_HUMAN	YWHAB	14-3-3 protein beta/alpha	376843	541579	400036	1054800	1129090	1069730
P31947;P31947-2	P31947;P31947-2	1433S_HUMAN	SFN	14-3-3 protein sigma	23394.4	51836.8	20772.7	108539	66598.5	60476.8
P31948;P31948-2	P31948;P31948-2;P31948-3	STIP1_HUMAN	STIP1	Stress-induced-phosphoprotein 1	78205.2	175895	80200.7	734080	682406	834420
P31949	P31949	S10AB_HUMAN	S100A11	Protein S100-A11	51261.4	120093	43808.7	161917	124394	133726
P32019;P32019-2;P32019-3	P32019;P32019-2;P32019-3	I5P2_HUMAN	INPP5B	Type II inositol 1,4,5-trisphosphate 5-phosphatase	30493.1	9741.88	14611.3
P32119	P32119	PRDX2_HUMAN	PRDX2	Peroxiredoxin-2	424629	533259	525410	608738	603509	508737
P32321;P32321-2	P32321;P32321-2	DCTD_HUMAN	DCTD	Deoxycytidylate deaminase	56871.9	63191.5	48533.8	68491.7	25323.7
P32322;P32322-2;P32322-3	P32322;P32322-2;P32322-3	P5CR1_HUMAN	PYCR1	Pyrroline-5-carboxylate reductase 1, mitochondrial	16157.5	21460.4	17834.1	43086.9	31708	28533.5
P32969	P32969	RL9_HUMAN	RPL9	Large ribosomal subunit protein uL6	180849	165792	239665	163009	245281	136763
P33176	O60282;P33176;Q12840	KINH_HUMAN	KIF5B	Kinesin-1 heavy chain	145836	187788	151442	227015	221508	283401
P33947;P33947-2	P33947;P33947-2	ERD22_HUMAN	KDELR2	ER lumen protein-retaining receptor 2	20864	24118	23052.5	12944.2		14599.2
P33991	P33991	MCM4_HUMAN	MCM4	DNA replication licensing factor MCM4	231299	204080	194783	240786	269693	283323
P33992	P33992	MCM5_HUMAN	MCM5	DNA replication licensing factor MCM5	527626	494905	494584	280574	281562	334659
P33993	P33993;P33993-2	MCM7_HUMAN	MCM7	DNA replication licensing factor MCM7	456132	462275	425652	306540	316713	341958
P34896;P34896-2	P34896;P34896-2;P34896-3	GLYC_HUMAN	SHMT1	Serine hydroxymethyltransferase, cytosolic	282985	290321	297376	222336	235997	188398
P34897;P34897-2;P34897-3	P34897;P34897-2;P34897-3	GLYM_HUMAN	SHMT2	Serine hydroxymethyltransferase, mitochondrial	559063	621582	551048	920407	908194	713278
P34932	P34932	HSP74_HUMAN	HSPA4	Heat shock 70 kDa protein 4	397317	437200	421278	216899	204521	135473
P34949	P34949	MPI_HUMAN	MPI	Mannose-6-phosphate isomerase	6677.47	14018.8	11865.8	43427.2	40450.7	69442
P35030;P35030-2;P35030-3;P35030-4;P35030-5	P35030;P35030-2;P35030-3;P35030-4;P35030-5	TRY3_HUMAN	PRSS3	Trypsin-3	418971	293522	278627	528939	464200	391361
P35080	P35080	PROF2_HUMAN	PFN2	Profilin-2		36039.4		29718.2		38182.7
P35080-2	P35080;P35080-2	PROF2_HUMAN	PFN2	Isoform IIb of Profilin-2	209288	202215	221501	284954	473086	302475
P35221;P35221-2	P35221;P35221-2;P35221-3	CTNA1_HUMAN	CTNNA1	Catenin alpha-1		13743.6		134991	113721	198625
P35222	P35222	CTNB1_HUMAN	CTNNB1	Catenin beta-1		13327.6		23905.6	26246	27429.5
P35232	P35232;P35232-2	PHB1_HUMAN	PHB1	Prohibitin 1	153113	90841.5	111945	97602.4	105425	102836
P35237	P35237	SPB6_HUMAN	SERPINB6	Serpin B6	107428	102327	87662	94512.4	63652.6	51794.6
P35241;P35241-5	P35241;P35241-2;P35241-3;P35241-4;P35241-5	RADI_HUMAN	RDX	Radixin	401605	496862	441937	356915	376845	232549
P35244	P35244	RFA3_HUMAN	RPA3	Replication protein A 14 kDa subunit	18856.8	40522.1	27817.4	94614.2	121793	132389
P35268	P35268	RL22_HUMAN	RPL22	Large ribosomal subunit protein eL22	441842	399801	455368	355647	359178	267556
P35270	P35270	SPRE_HUMAN	SPR	Sepiapterin reductase				51585.2	50873.1	80313.6
P35520;P35520-2	P35520;P35520-2	CBS_HUMAN	CBS	Cystathionine beta-synthase	91503.4	105120	79855.1	72700.6	85130.8	80794.1
P35527	P35527	K1C9_HUMAN	KRT9	Keratin, type I cytoskeletal 9	4352480	3982990	4879350	13716000	8668560	6679170
P35579	P35579;P35579-2	MYH9_HUMAN	MYH9	Myosin-9	55811.3	78985	78303.9	122396	118778	175631
P35580;P35580-3	P35580;P35580-2;P35580-3;P35580-4;P35580-5	MYH10_HUMAN	MYH10	Myosin-10	22121.3	36159.5	32803.8	29941.2	37282.3	60395
P35606;P35606-2	P35606;P35606-2	COPB2_HUMAN	COPB2	Coatomer subunit beta'	281816	261235	283147	185736	209529	173625
P35613;P35613-2;P35613-3;P35613-4	P35613;P35613-2;P35613-3;P35613-4	BASI_HUMAN	BSG	Basigin		12582.5
P35658;P35658-2;P35658-3;P35658-4;P35658-5	P35658;P35658-2;P35658-3;P35658-4;P35658-5	NU214_HUMAN	NUP214	Nuclear pore complex protein Nup214	66467.8	79680.3	65704.4	80553	96199.3	133802
P35813;P35813-3	P35813;P35813-2;P35813-3	PPM1A_HUMAN	PPM1A	Protein phosphatase 1A	64316.5	67369.2	64951.3	58958	51761.5	44410.3
P35908	P35908	K22E_HUMAN	KRT2	Keratin, type II cytoskeletal 2 epidermal	547220	610666	665099	1430000	1210780	1146560
P35998	P35998;P35998-2	PRS7_HUMAN	PSMC2	26S proteasome regulatory subunit 7	197814	204543	208949	194301	213277	214401
P36404;P36404-2	P36404;P36404-2	ARL2_HUMAN	ARL2	ADP-ribosylation factor-like protein 2	24068.1	26522.4	34854.8	39355.9	46245.4	32534.4
P36405	P36405	ARL3_HUMAN	ARL3	ADP-ribosylation factor-like protein 3	106721	151198	138844	259367	243096	313209
P36406;P36406-2;P36406-3	P36406;P36406-2;P36406-3	TRI23_HUMAN	TRIM23	E3 ubiquitin-protein ligase TRIM23		101210	53907.1		76532.3	79207.2
P36507	P36507	MP2K2_HUMAN	MAP2K2	Dual specificity mitogen-activated protein kinase kinase 2	29826.3	28463.9	20800.3	18296.2	25000.4	58452.2
P36542;P36542-2	P36542;P36542-2	ATPG_HUMAN	ATP5F1C	ATP synthase subunit gamma, mitochondrial	123404	123788	110883	92867.6	103708	97858.4
P36543;P36543-2	P36543;P36543-2	VATE1_HUMAN	ATP6V1E1	V-type proton ATPase subunit E 1		6422.3		86324.6	75578.7	86116.5
P36575;P36575-2	P36575;P36575-2	ARRC_HUMAN	ARR3	Arrestin-C	30752.4	31524.8	46215		24192.4	13563.6
P36578	P36578	RL4_HUMAN	RPL4	Large ribosomal subunit protein uL4	198942	209747	193256	190709	203163	116939
P36639;P36639-1;P36639-2;P36639-3	P36639;P36639-1;P36639-2;P36639-3	8ODP_HUMAN	NUDT1	Oxidized purine nucleoside triphosphate hydrolase	29437.7	42637.4	29612.6	50807.5	46808.5	33789.6
P36776;P36776-2;P36776-3	P36776;P36776-2;P36776-3	LONM_HUMAN	LONP1	Lon protease homolog, mitochondrial	14166	20032.1	13986.1	66437.6	71397.6	89181.9
P36871;P36871-2;P36871-3	P36871;P36871-2;P36871-3	PGM1_HUMAN	PGM1	Phosphoglucomutase-1	16890.9	26317.6	24462.7	18774.5	23302.4
P36873;P36873-2	P36873;P36873-2	PP1G_HUMAN	PPP1CC	Serine/threonine-protein phosphatase PP1-gamma catalytic subunit	84270.9	84301.7	79204.4	93361.1	90584.6	73318.2
P36915	P36915;P36915-2	GNL1_HUMAN	GNL1	Guanine nucleotide-binding protein-like 1	30640.1	31580.2	22207.7	62271.1	67548.6	111987
P36954	P36954	RPB9_HUMAN	POLR2I	DNA-directed RNA polymerase II subunit RPB9				59441.5	56290.6	49879.1
P36957;P36957-2	P36957;P36957-2	ODO2_HUMAN	DLST	Dihydrolipoyllysine-residue succinyltransferase component of 2-oxoglutarate dehydrogenase complex, mitochondrial	145267	138262	153217	110562	120946	93753.1
P37108	P37108	SRP14_HUMAN	SRP14	Signal recognition particle 14 kDa protein	152611	154888	163168	86923.3	80394.8	66789
P37198	P37198	NUP62_HUMAN	NUP62	Nuclear pore glycoprotein p62	22348.2	26135.9	26170.3	45070.9	36668.9	67846.6
P37802;P37802-2	P37802;P37802-2	TAGL2_HUMAN	TAGLN2	Transgelin-2	56386.6	115280	56032.4	635077	624433	748587
P37837;P37837-2	P37837;P37837-2	TALDO_HUMAN	TALDO1	Transaldolase	249937	331620	215566	324199	337469	300850
P38117;P38117-2	P38117;P38117-2	ETFB_HUMAN	ETFB	Electron transfer flavoprotein subunit beta	49416.2	65914.7	51046.6	132143	117464	192930
P38159	P38159;Q96E39;P38159-2	RBMX_HUMAN	RBMX	RNA-binding motif protein, X chromosome	669778	625712	682116	1047670	920606	732751
P38606;P38606-2	P38606;P38606-2	VATA_HUMAN	ATP6V1A	V-type proton ATPase catalytic subunit A	251192	221310	245971	275009	265094	255329
P38646	P38646	GRP75_HUMAN	HSPA9	Stress-70 protein, mitochondrial	193084	330361	224445	541186	509866	497299
P38919	P38919	IF4A3_HUMAN	EIF4A3	Eukaryotic initiation factor 4A-III	310118	280821	324622	537788	597676	515464
P38936	P38936	CDN1A_HUMAN	CDKN1A	Cyclin-dependent kinase inhibitor 1			20834.3	28055	29903.2	40574.9
P39019	P39019	RS19_HUMAN	RPS19	Small ribosomal subunit protein eS19	137000	192311	134940	232404	209143	172000
P39023	P39023	RL3_HUMAN	RPL3	Large ribosomal subunit protein uL3	97686.7	102603	107108	107921	129664	75571.4
P39656;P39656-3	P39656;P39656-2;P39656-3	OST48_HUMAN	DDOST	Dolichyl-diphosphooligosaccharide--protein glycosyltransferase 48 kDa subunit	161381	165802	198301	141724	176132	103417
P39687	P39687;O43423	AN32A_HUMAN	ANP32A	Acidic leucine-rich nuclear phosphoprotein 32 family member A	45520.2	100227	41145	191401	170288	165672
P39748;P39748-2	P39748;P39748-2	FEN1_HUMAN	FEN1	Flap endonuclease 1		30352	41000.9	212782	200679	362597
P40121;P40121-2	P40121;P40121-2	CAPG_HUMAN	CAPG	Macrophage-capping protein				42970.8	63209.8	76715
P40123	P40123;P40123-2	CAP2_HUMAN	CAP2	Adenylyl cyclase-associated protein 2	125500	86799.9	91572.4	64420.1	60840.3	53336.5
P40222	P40222	TXLNA_HUMAN	TXLNA	Alpha-taxilin				19740.7	22421.2	37301.2
P40227	P40227;P40227-2	TCPZ_HUMAN	CCT6A	T-complex protein 1 subunit zeta	190957	157603	145374	276394	287101	275508
P40394;P40394-2	P40394;P40394-2	ADH7_HUMAN	ADH7	All-trans-retinol dehydrogenase [NAD(+)] ADH7	46302	39702.7	63764.9	136380	142900	67075.9
P40429	P40429	RL13A_HUMAN	RPL13A	Large ribosomal subunit protein uL13	77824.4	63159.5	86145.3	50892.7	66506.8	34191.9
P40616;P40616-2	P40616;P40616-2	ARL1_HUMAN	ARL1	ADP-ribosylation factor-like protein 1	190809	162877	193041	115803	160445	132442
P40763;P40763-2;P40763-3	P40763;P40763-2;P40763-3	STAT3_HUMAN	STAT3	Signal transducer and activator of transcription 3	161778	151170	164680	75743.3	81521.5	131780
P40818	P40818;P40818-2	UBP8_HUMAN	USP8	Ubiquitin carboxyl-terminal hydrolase 8	6771900	6740840	6872470	266533	246534	252153
P40925;P40925-3	P40925;P40925-2;P40925-3	MDHC_HUMAN	MDH1	Malate dehydrogenase, cytoplasmic	252539	302841	210035	210521	175496	143080
P40926	P40926;P40926-2	MDHM_HUMAN	MDH2	Malate dehydrogenase, mitochondrial	1003910	990518	810056	358485	299684	247045
P40938;P40938-2	P40938;P40938-2	RFC3_HUMAN	RFC3	Replication factor C subunit 3	16437.1	20338.2	16390.9	20704.5	19878	53397.7
P40939	P40939	ECHA_HUMAN	HADHA	Trifunctional enzyme subunit alpha, mitochondrial	195119	193781	196334	110373	121239	134874
P41091	P41091	IF2G_HUMAN	EIF2S3	Eukaryotic translation initiation factor 2 subunit 3	419652	388885	454818	382344	461345	320859
P41223;P41223-2	P41223;P41223-2	BUD31_HUMAN	BUD31	Protein BUD31 homolog	51397	32683.4	31028.8	73995.7	44758.8	58380.7
P41227;P41227-2	P41227;Q9BSU3;P41227-2	NAA10_HUMAN	NAA10	N-alpha-acetyltransferase 10	129309	117531	127792	73465.1	94736	115908
P41240	P41240	CSK_HUMAN	CSK	Tyrosine-protein kinase CSK	30417	29395.8	38076.9	61490.9	66192	90406.2
P41250;P41250-2	P41250;P41250-2	GARS_HUMAN	GARS1	Glycine--tRNA ligase	213403	211096	213039	175181	187479	154918
P41252	P41252	SYIC_HUMAN	IARS1	Isoleucine--tRNA ligase, cytoplasmic	353561	364498	347361	236759	231787	236314
P41743	P41743;Q05513;Q05513-2;Q05513-3	KPCI_HUMAN	PRKCI	Protein kinase C iota type	142005	126789	124913	58151.5	54580.5	51347.9
P42025	P42025	ACTY_HUMAN	ACTR1B	Beta-centractin	157643	125767	156331	110749	141093	125936
P42126;P42126-2	P42126;P42126-2	ECI1_HUMAN	ECI1	Enoyl-CoA delta isomerase 1, mitochondrial	90278.9	100104	98211.6	46008.4	41981.2	34629
P42166	P42166	LAP2A_HUMAN	TMPO	Lamina-associated polypeptide 2, isoform alpha				13439	22141.6	28644.5
P42224	P42224;P42224-2	STAT1_HUMAN	STAT1	Signal transducer and activator of transcription 1-alpha/beta	475758	502284	456960	420096	435994	544692
P42229;P42229-2;P51692	P42229;P51692;P42229-2	STA5A_HUMAN;STA5B_HUMAN	STAT5A;STAT5B	Signal transducer and activator of transcription 5A	38706.5	43592.9	49510.1	66646.8		51004.7
P42285	P42285	MTREX_HUMAN	MTREX	Exosome RNA helicase MTR4	42293.1	30570.1		32463.6	30625.5	23546.8
P42330	P42330;P42330-2	AK1C3_HUMAN	AKR1C3	Aldo-keto reductase family 1 member C3	92364.1	97914.9	90002.4	69970.9	59968.1	42243.1
P42338	P42338	PK3CB_HUMAN	PIK3CB	Phosphatidylinositol 4,5-bisphosphate 3-kinase catalytic subunit beta isoform			12520.2		20479.5	10501.9
P42677	P42677	RS27_HUMAN	RPS27	Small ribosomal subunit protein eS27	264630	225134	228565	104740	88537	123443
P42685;P42685-2	P42685;P42685-2	FRK_HUMAN	FRK	Tyrosine-protein kinase FRK	38694.8	52426.3	35718.7	74387.3	77644.9	104013
P42704	P42704	LPPRC_HUMAN	LRPPRC	Leucine-rich PPR motif-containing protein, mitochondrial	112576	119867	89702.8	352652	412755	555683
P42765	P42765	THIM_HUMAN	ACAA2	3-ketoacyl-CoA thiolase, mitochondrial	70579.2	67139.2	58537.7	65963.6	18159.5	13131.7
P42766	P42766	RL35_HUMAN	RPL35	Large ribosomal subunit protein uL29	36284.2	44391.9	43960	85748.9	76234.6	44070
P43034	P43034;P43034-2	LIS1_HUMAN	PAFAH1B1	Platelet-activating factor acetylhydrolase IB subunit beta	206657	182492	217615	148423	145236	113439
P43243	P43243;P43243-2	MATR3_HUMAN	MATR3	Matrin-3	55159.2	85863.7	51838.9	364622	316190	603839
P43246;P43246-2	P43246;P43246-2	MSH2_HUMAN	MSH2	DNA mismatch repair protein Msh2	214894	210665	293051	303104	345870	287740
P43251;P43251-2;P43251-3;P43251-4	P43251;P43251-2;P43251-3;P43251-4	BTD_HUMAN	BTD	Biotinidase	33963.8	29786.7	28295.2	14818.9
P43304	P43304;P43304-2	GPDM_HUMAN	GPD2	Glycerol-3-phosphate dehydrogenase, mitochondrial				25184.2		15543.1
P43487;P43487-2	P43487;Q9C010;Q9C010-2;P43487-2	RANG_HUMAN	RANBP1	Ran-specific GTPase-activating protein	22201.9	33345.9	23989.6	135794	84915.3	122597
P43490	P43490	NAMPT_HUMAN	NAMPT	Nicotinamide phosphoribosyltransferase	299147	319202	267843	270547	268248	249680
P43686	P43686;P43686-2	PRS6B_HUMAN	PSMC4	26S proteasome regulatory subunit 6B	171895	176759	164012	178418	180042	161642
P43897	P43897;P43897-2	EFTS_HUMAN	TSFM	Elongation factor Ts, mitochondrial	267516	267263	249113	346608	307910	473323
P45877	P45877	PPIC_HUMAN	PPIC	Peptidyl-prolyl cis-trans isomerase C	407010	375437	362199	465332	419971	423042
P45880;P45880-1;P45880-2	P45880;P45880-1;P45880-2	VDAC2_HUMAN	VDAC2	Voltage-dependent anion-selective channel protein 2	290224	289404	279372	165740	178922	159193
P45954;P45954-2	P45954;P45954-2	ACDSB_HUMAN	ACADSB	Short/branched chain specific acyl-CoA dehydrogenase, mitochondrial	17632	21313.3	10621.5	28649.2	28790.7	42736.1
P45974;P45974-2	P45974;P45974-2	UBP5_HUMAN	USP5	Ubiquitin carboxyl-terminal hydrolase 5	34059400	32103100	35740400	446977	420334	403165
P46060	P46060	RAGP1_HUMAN	RANGAP1	Ran GTPase-activating protein 1	67185.9	87476		146030	139739	267448
P46063	P46063	RECQ1_HUMAN	RECQL	ATP-dependent DNA helicase Q1	138186	141741	129994	66556.4	66982.2	75137.2
P46379;P46379-2;P46379-3	P46379;P46379-2;P46379-3;P46379-4;P46379-5	BAG6_HUMAN	BAG6	Large proline-rich protein BAG6	56410.4	69241.9	12220.8	138670	141908	182300
P46459;P46459-2	P46459;P46459-2	NSF_HUMAN	NSF	Vesicle-fusing ATPase	86919.4	88541.5	82442.6	90483.6	101920	114495
P46736;P46736-2;P46736-3	P46736;P46736-2;P46736-3;P46736-4	BRCC3_HUMAN	BRCC3	Lys-63-specific deubiquitinase BRCC36	96765.5	87943.1	96162.7	59657.2	80008.3	46538.6
P46776	P46776	RL27A_HUMAN	RPL27A	Large ribosomal subunit protein uL15	484474	566861	613305	546106	611067	442211
P46777	P46777	RL5_HUMAN	RPL5	Large ribosomal subunit protein uL18	313885	313210	308340	227565	202243	175826
P46778	P46778	RL21_HUMAN	RPL21	Large ribosomal subunit protein eL21	151443	165898	149761	132582	115154	96653.5
P46781	P46781	RS9_HUMAN	RPS9	Small ribosomal subunit protein uS4	811449	928606	1109960	956734	1083770	638132
P46782	P46782	RS5_HUMAN	RPS5	Small ribosomal subunit protein uS7	74353.6	103858	74948.4	125602	87940.4	103955
P46783	P46783	RS10_HUMAN	RPS10	Small ribosomal subunit protein eS10	12546.5	27763.9	23369.1	34549.2	51693.4
P46934-4	P46934;P46934-3;P46934-4;P46934-2	NEDD4_HUMAN	NEDD4	Isoform 4 of E3 ubiquitin-protein ligase NEDD4	79268.8	73165.6	76035.4	44936.5	47100.9	51690.5
P46940	P46940	IQGA1_HUMAN	IQGAP1	Ras GTPase-activating-like protein IQGAP1	454690	565070	467286	882362	915933	1354550
P46977	P46977;P46977-2	STT3A_HUMAN	STT3A	Dolichyl-diphosphooligosaccharide--protein glycosyltransferase subunit STT3A	100983	86934.5	85611.9	52788.9	52430.6	45532.4
P47224	P47224	MSS4_HUMAN	RABIF	Guanine nucleotide exchange factor MSS4	49282.4	58851.2	30614.6	27718.3	46076.4	37999.1
P47755	P47755;P47755-2	CAZA2_HUMAN	CAPZA2	F-actin-capping protein subunit alpha-2	398654	410579	411105	246354	261322	242407
P47756	P47756	CAPZB_HUMAN	CAPZB	F-actin-capping protein subunit beta	373735	403776	376579	264249	237215	208786
P47897	P47897;P47897-2	SYQ_HUMAN	QARS1	Glutamine--tRNA ligase	153625	167015	151084	207466	216894	243324
P47914	P47914	RL29_HUMAN	RPL29	Large ribosomal subunit protein eL29	27035.8	34961.1	37283.3	61442.4	45156.5	32832.6
P47929	P47929	LEG7_HUMAN	LGALS7	Galectin-7				71424.4
P47985	P47985;P0C7P4	UCRI_HUMAN	UQCRFS1	Cytochrome b-c1 complex subunit Rieske, mitochondrial	196099	193879	219204	105801	101940	96431
P48147	P48147	PPCE_HUMAN	PREP	Prolyl endopeptidase	122627	133671	116616	142750	145054	101641
P48163	P48163	MAOX_HUMAN	ME1	NADP-dependent malic enzyme	247995	238757	219386	134414	133858	83702
P48444	P48444;P48444-2	COPD_HUMAN	ARCN1	Coatomer subunit delta	274833	270638	305481	243783	276357	348575
P48449	P48449;P48449-2	LSS_HUMAN	LSS	Lanosterol synthase	45241.5	27205	38324.7	41043.5	56807	38883.3
P48506	P48506	GSH1_HUMAN	GCLC	Glutamate--cysteine ligase catalytic subunit	117590	107517	101156	141859	133093
P48556	P48556	PSMD8_HUMAN	PSMD8	26S proteasome non-ATPase regulatory subunit 8	8818.32	14387.6	11100.6	55896	60925.5	55992.7
P48594	P48594	SPB4_HUMAN	SERPINB4	Serpin B4				77488.2
P48637	P48637;P48637-2	GSHB_HUMAN	GSS	Glutathione synthetase	249381	206676	218750	129990	138054	102192
P48643	P48643;P48643-2	TCPE_HUMAN	CCT5	T-complex protein 1 subunit epsilon	357666	380375	389062	267577	303540	277926
P48729;P48729-2;P48729-3	P48729;Q8N752;P48729-2;P48729-3	KC1A_HUMAN	CSNK1A1	Casein kinase I isoform alpha	90156.5	102214	103659	80390	80398.8	95713.4
P48730;P48730-2;P49674	P48730;P48730-2;P49674	KC1D_HUMAN;KC1E_HUMAN	CSNK1D;CSNK1E	Casein kinase I isoform delta	37616.8	36930.2	51598.3	29828.6	34494.4	26359.8
P48735;P48735-2	P48735;P48735-2	IDHP_HUMAN	IDH2	Isocitrate dehydrogenase [NADP], mitochondrial	442984	489489	440478	790009	778760	858445
P48739;P48739-2;P48739-3	P48739;P48739-2;P48739-3	PIPNB_HUMAN	PITPNB	Phosphatidylinositol transfer protein beta isoform	52853.2	48779.2	52480.9	106555	99929.1	92192.4
P48741	P17066;P48741	HSP77_HUMAN	HSPA7	Putative heat shock 70 kDa protein 7	2221460	2510370	2269780	2605310	2578730	2009080
P49005	P49005	DPOD2_HUMAN	POLD2	DNA polymerase delta subunit 2	126099	118358	107755	66221.1	107448	105730
P49023;P49023-2;P49023-3	P49023;P49023-2;P49023-3	PAXI_HUMAN	PXN	Paxillin	43167.5	46681.5	32890.3	95676.6	93105.8	139143
P49137;P49137-2;Q16644	P49137;Q16644;P49137-2	MAPK2_HUMAN;MAPK3_HUMAN	MAPKAPK2;MAPKAPK3	MAP kinase-activated protein kinase 2		11246.5		35436.8		52822.4
P49189;P49189-3	P49189;P49189-3	AL9A1_HUMAN	ALDH9A1	4-trimethylaminobutyraldehyde dehydrogenase	120770	111411	94900.8	55355.2	67756.7	48354.1
P49207	P49207	RL34_HUMAN	RPL34	Large ribosomal subunit protein eL34	346280	410868	372524	163933	177998	122041
P49257	P49257	LMAN1_HUMAN	LMAN1	Protein ERGIC-53	69082.2	76677.5	79268.4	55583	58428.3	34414
P49321;P49321-2;P49321-3;P49321-4	P49321;P49321-2;P49321-3;P49321-4	NASP_HUMAN	NASP	Nuclear autoantigenic sperm protein		21458.4	21447	44555.4	42479.9	39321.6
P49327	P49327	FAS_HUMAN	FASN	Fatty acid synthase	2576030	2559940	2682800	2292480	2346360	2385450
P49366;P49366-3	P49366;P49366-3	DHYS_HUMAN	DHPS	Deoxyhypusine synthase		17756.8		24210.4	36896.9	15871.7
P49368	P49368;P49368-2	TCPG_HUMAN	CCT3	T-complex protein 1 subunit gamma	133745	155667	166716	416463	472265	355368
P49406	P49406	RM19_HUMAN	MRPL19	Large ribosomal subunit protein bL19m	71559.8	43199.8	68136.4	53032.9	64258	36222.3
P49407;P49407-2	P49407;P49407-2	ARRB1_HUMAN	ARRB1	Beta-arrestin-1	30779.3	22032.8	35044.9	13928.4		17598.5
P49411	P49411	EFTU_HUMAN	TUFM	Elongation factor Tu, mitochondrial	1399150	1422950	1478560	1264920	1340750	1593710
P49419;P49419-2	P49419;P49419-2	AL7A1_HUMAN	ALDH7A1	Alpha-aminoadipic semialdehyde dehydrogenase	62364.4	62449.2	48909.3	94997.2	89484	98227.5
P49588	P49588;P49588-2	SYAC_HUMAN	AARS1	Alanine--tRNA ligase, cytoplasmic	252612	270409	213404	572112	587909	587092
P49589;P49589-2;P49589-3	P49589;P49589-2;P49589-3	SYCC_HUMAN	CARS1	Cysteine--tRNA ligase, cytoplasmic	53886.1	61896.8	57120.9	41115.1	32945.1	44826.6
P49591	P49591	SYSC_HUMAN	SARS1	Serine--tRNA ligase, cytoplasmic	510441	406176	458035	680175	659204	481455
P49643	P49643	PRI2_HUMAN	PRIM2	DNA primase large subunit	30641.9		7132.1			46526.1
P49711;P49711-2	P49711;P49711-2	CTCF_HUMAN	CTCF	Transcriptional repressor CTCF	39431.1	42785.7	37438.5	28850.7	22534
P49720	P49720	PSB3_HUMAN	PSMB3	Proteasome subunit beta type-3	250785	254311	242038	172382	222485	105667
P49721	P49721	PSB2_HUMAN	PSMB2	Proteasome subunit beta type-2	96805.3	106689	101837	81489.6	68116.4	48464.4
P49736	P49736	MCM2_HUMAN	MCM2	DNA replication licensing factor MCM2	325872	340466	337678	497480	523546	553475
P49748;P49748-3	P49748;P49748-3	ACADV_HUMAN	ACADVL	Very long-chain specific acyl-CoA dehydrogenase, mitochondrial	26079.6	23713.6	23863.8	44029.3	40392.7	35171
P49753;Q86TX2	P49753;Q86TX2	ACOT1_HUMAN;ACOT2_HUMAN	ACOT1;ACOT2	Acyl-coenzyme A thioesterase 2, mitochondrial	27647.1	25044.4	34279.6	46348.9	21191.3	24437.7
P49755	P49755	TMEDA_HUMAN	TMED10	Transmembrane emp24 domain-containing protein 10	255494	235095	243743	65538.7	55720	52278.3
P49756	P49756;P49756-2;P49756-3	RBM25_HUMAN	RBM25	RNA-binding protein 25	33108.9	38549.5	35759.6	79772.2	79182	57206.3
P49773	P49773	HINT1_HUMAN	HINT1	Adenosine 5'-monophosphoramidase HINT1	73395.8	101260	82018.1	273457	244236	191307
P49792	P49792;Q99666;A6NKT7;O14715;P0DJD0;P0DJD1;Q7Z3J3	RBP2_HUMAN	RANBP2	E3 SUMO-protein ligase RanBP2	30314	33652.8		28850.1	23434.2	31970.5
P49840	P49840	GSK3A_HUMAN	GSK3A	Glycogen synthase kinase-3 alpha			27944
P49841;P49841-2	P49841;P49841-2	GSK3B_HUMAN	GSK3B	Glycogen synthase kinase-3 beta	62313.5	67801.4	68044.1	53138.3	53827.6	55383.7
P49902;P49902-2	P49902;P49902-2	5NTC_HUMAN	NT5C2	Cytosolic purine 5'-nucleotidase	147233	138048	141668	149736	164424	133883
P49903;P49903-3	P49903;P49903-2;P49903-3	SPS1_HUMAN	SEPHS1	Selenide, water dikinase 1	77471.3	45133.4	61257.2	94293.2	136030	67514.9
P49915	P49915;P49915-2	GUAA_HUMAN	GMPS	GMP synthase [glutamine-hydrolyzing]	174629	192429	198594	231718	279873	280456
P49959;P49959-2;P49959-3	P49959;P49959-2;P49959-3	MRE11_HUMAN	MRE11	Double-strand break repair protein MRE11	71221.6	64648.6	78413	85840.2	92841.1	101451
P50213	P50213;P50213-2	IDH3A_HUMAN	IDH3A	Isocitrate dehydrogenase [NAD] subunit alpha, mitochondrial	145604	164788	119548	317199	337676	449746
P50395	P50395;P50395-2	GDIB_HUMAN	GDI2	Rab GDP dissociation inhibitor beta	1271430	1405600	1349780	725737	734441	516781
P50416;P50416-2	P50416;P50416-2	CPT1A_HUMAN	CPT1A	Carnitine O-palmitoyltransferase 1, liver isoform	28275.8	33169.5	24639.2		15351.1	29077.7
P50454	P50454	SERPH_HUMAN	SERPINH1	Serpin H1	396123	359239	388577	280986	306931	232804
P50502;Q8IZP2	P50502;Q8IZP2;Q8NFI4	F10A1_HUMAN;ST134_HUMAN	ST13;ST13P4	Hsc70-interacting protein				56854.1	67540.8	47181
P50552	P50552	VASP_HUMAN	VASP	Vasodilator-stimulated phosphoprotein	52241	72223.3	61208.9	85675.5	72340.6	110295
P50570;P50570-2;P50570-5	P50570;P50570-2;Q9UQ16;P50570-3;P50570-4;P50570-5;Q9UQ16-2;Q9UQ16-3;Q9UQ16-4;Q9UQ16-5	DYN2_HUMAN	DNM2	Dynamin-2	59966.6	72213.5	76047.3	87677	92753.7	144387
P50579;P50579-2;P50579-3	P50579;P50579-2;P50579-3	MAP2_HUMAN	METAP2	Methionine aminopeptidase 2	35815.1	42987	45086.4	87718.6	77371.3	85500.8
P50583	P50583	AP4A_HUMAN	NUDT2	Bis(5'-nucleosyl)-tetraphosphatase [asymmetrical]	72861.2	90297.5	80492.9	107623	130794	106536
P50851-2	P50851-2	LRBA_HUMAN	LRBA	Isoform 2 of Lipopolysaccharide-responsive and beige-like anchor protein	21162.3	19020.5	19744.4	6946.39	8195.81	28579.9
P50914	P50914	RL14_HUMAN	RPL14	Large ribosomal subunit protein eL14	235471	270694	301461	277973	223180	188936
P50990	P50990;P50990-2;P50990-3	TCPQ_HUMAN	CCT8	T-complex protein 1 subunit theta	230732	268369	270289	462262	464194	453713
P50991	P50991;P50991-2	TCPD_HUMAN	CCT4	T-complex protein 1 subunit delta	254984	247564	265396	554700	598563	565616
P50995;P50995-2	P50995;P50995-2	ANX11_HUMAN	ANXA11	Annexin A11	182171	252060	169409	1027470	912495	1232670
P51003	P51003;Q9NRJ5;P51003-2	PAPOA_HUMAN	PAPOLA	Poly(A) polymerase alpha	55978.1	39441.5	80909	67421	93574.7	101097
P51114;P51114-2;P51114-3	P51114;P51114-2;P51114-3	FXR1_HUMAN	FXR1	RNA-binding protein FXR1	30517.8	33165.2		20291.1		39194
P51148;P51148-2	P51148;P51148-2	RAB5C_HUMAN	RAB5C	Ras-related protein Rab-5C	378515	345803	341825	177079	216834	198849
P51149	P51149	RAB7A_HUMAN	RAB7A	Ras-related protein Rab-7a	193008	190550	174990	127558	143360	114577
P51153	P51153	RAB13_HUMAN	RAB13	Ras-related protein Rab-13	52665.4	42414.2	66108	29384.8	45695.2	36846.5
P51398;P51398-2;P51398-3	P51398;P51398-2;P51398-3	RT29_HUMAN	DAP3	Small ribosomal subunit protein mS29				27225	20063.7	23977.6
P51570	P51570	GALK1_HUMAN	GALK1	Galactokinase	146169	157063	130229	277228	245899	352557
P51571	P51571	SSRD_HUMAN	SSR4	Translocon-associated protein subunit delta	204234	211671	229959	87070.6	92585.2	167973
P51572;P51572-2	P51572;P51572-2	BAP31_HUMAN	BCAP31	B-cell receptor-associated protein 31	21597.1		10594.3	26234.5	32478.8	33816.6
P51610;P51610-2;P51610-4	P51610;P51610-2;P51610-4	HCFC1_HUMAN	HCFC1	Host cell factor 1	66583	51210.9	65622.5	71788.2	77812.3	117629
P51649;P51649-2	P51649;P51649-2	SSDH_HUMAN	ALDH5A1	Succinate-semialdehyde dehydrogenase, mitochondrial	105567	98250.8	110642	84086.7	84838	95693.9
P51659	P51659	DHB4_HUMAN	HSD17B4	Peroxisomal multifunctional enzyme type 2	109028	111385	126175	121924	132902	163582
P51665	P51665	PSMD7_HUMAN	PSMD7	26S proteasome non-ATPase regulatory subunit 7	70787.1	134469	86966.9	152205	101121	172350
P51784	P51784	UBP11_HUMAN	USP11	Ubiquitin carboxyl-terminal hydrolase 11	431748	460214	468957	35706.4	36079.1	18593.4
P51812	P51812;Q15349;Q15418;Q9UK32;Q15349-2;Q15349-3;Q15418-2;Q15418-3;Q15418-4;Q9UK32-2	KS6A3_HUMAN	RPS6KA3	Ribosomal protein S6 kinase alpha-3	401076	320028	415103	420449	426479	382745
P51858	P51858;P51858-2;P51858-3	HDGF_HUMAN	HDGF	Hepatoma-derived growth factor	136895	166661	140257	225367	200499
P51965;P51965-2;P51965-3;Q969T4;Q96LR5	P51965;Q969T4;Q96LR5;P51965-2;P51965-3	UB2E1_HUMAN;UB2E2_HUMAN;UB2E3_HUMAN	UBE2E1;UBE2E2;UBE2E3	Ubiquitin-conjugating enzyme E2 E1	168569	160667	155798	130162	132585	182156
P51991;P51991-2	P51991;P51991-2	ROA3_HUMAN	HNRNPA3	Heterogeneous nuclear ribonucleoprotein A3	1833640	1857450	1700120	2108250	1729050	1698950
P52209;P52209-2	P52209;P52209-2	6PGD_HUMAN	PGD	6-phosphogluconate dehydrogenase, decarboxylating	592281	686764	512811	1181530	1173730	1245040
P52272;P52272-2	P52272;P52272-2	HNRPM_HUMAN	HNRNPM	Heterogeneous nuclear ribonucleoprotein M	352961	430202	388623	1250100	1012530	1439970
P52292	P52292	IMA1_HUMAN	KPNA2	Importin subunit alpha-1	22615.2	26330	15530.2	98408.8	96653.7	157645
P52294	O15131;P52294	IMA5_HUMAN	KPNA1	Importin subunit alpha-5	181747	169193	204158	220414	221590	278244
P52298;P52298-3	P52298;P52298-2;P52298-3	NCBP2_HUMAN	NCBP2	Nuclear cap-binding protein subunit 2	20836.8	22551.9	16512.2	58295.1	56328.7	84008.7
P52306;P52306-4;P52306-5	P52306;P52306-5;P52306-4	GDS1_HUMAN	RAP1GDS1	Rap1 GTPase-GDP dissociation stimulator 1			12116.7	46572.6	23252.6	44514.7
P52434	P52434;P52434-3;P52434-4	RPAB3_HUMAN	POLR2H	DNA-directed RNA polymerases I, II, and III subunit RPABC3	398488	348388	423286	313586	342796	287860
P52565	P52565;P52565-2	GDIR1_HUMAN	ARHGDIA	Rho GDP-dissociation inhibitor 1	439118	451776	437147	326639	349382	251204
P52597	P52597	HNRPF_HUMAN	HNRNPF	Heterogeneous nuclear ribonucleoprotein F	88314.6	117793	103871	389755	345664	378615
P52630;P52630-4	P52630;P52630-4	STAT2_HUMAN	STAT2	Signal transducer and activator of transcription 2	82342.9	58478.8	55229.3	76939.1		87208.2
P52735;P52735-2;P52735-3	P52735;P52735-2;P52735-3	VAV2_HUMAN	VAV2	Guanine nucleotide exchange factor VAV2	53300.2	47258.4	56941.1	48713.4	45479.7	49580.1
P52788	P52788;P52788-2	SPSY_HUMAN	SMS	Spermine synthase	149558	153186	147265	145449	159536	114528
P52789	P52789	HXK2_HUMAN	HK2	Hexokinase-2	29640.6	32474.1	41561.8	150982	135497	72949.7
P52888	P52888	THOP1_HUMAN	THOP1	Thimet oligopeptidase	47713.6	31959.5	39515.8	59035.5	66282.3	25893.8
P52895	P42330;P52895;Q04828;P42330-2	AK1C2_HUMAN	AKR1C2	Aldo-keto reductase family 1 member C2	438722	394812	315075	340727	374817	346675
P52907	P47755;P52907;P47755-2	CAZA1_HUMAN	CAPZA1	F-actin-capping protein subunit alpha-1	962283	996662	1018680	800725	804055	645097
P52943	P52943	CRIP2_HUMAN	CRIP2	Cysteine-rich protein 2	31105.6	42306.4	23890.2	368791	350964	485286
P53004	P53004	BIEA_HUMAN	BLVRA	Biliverdin reductase A	1072280	1038080	1082610	600032	678327	645851
P53041	P53041	PPP5_HUMAN	PPP5C	Serine/threonine-protein phosphatase 5	144996	133785	121484	89814.8	74824.2	90479.2
P53396;P53396-2	P53396;P53396-2;P53396-3	ACLY_HUMAN	ACLY	ATP-citrate synthase	264146	287341	280497	308838	318730	286075
P53582	P53582	MAP11_HUMAN	METAP1	Methionine aminopeptidase 1	1449470	1182180	1485050	1545480	1291680	1060260
P53597	P53597	SUCA_HUMAN	SUCLG1	Succinate--CoA ligase [ADP/GDP-forming] subunit alpha, mitochondrial	551663	528572	524141	303607	250218	383817
P53602	P53602	MVD1_HUMAN	MVD	Diphosphomevalonate decarboxylase	163637	160366	163397	65804.5	63513.5	72627.8
P53618	P53618	COPB_HUMAN	COPB1	Coatomer subunit beta	300974	294719	345005	350519	363110	400298
P53621;P53621-2	P53621;P53621-2	COPA_HUMAN	COPA	Coatomer subunit alpha	148433	174347	159947	164337	193079	172188
P53634	P53634	CATC_HUMAN	CTSC	Dipeptidyl peptidase 1	516386	507682	518371	272175	283705	151981
P53680	P53680;P53680-2	AP2S1_HUMAN	AP2S1	AP-2 complex subunit sigma	77985.5	51625.1	71439.5	163087	244889	128250
P53990;P53990-2;P53990-3;P53990-4;P53990-5	P53990;P53990-3;P53990-2;P53990-4;P53990-5	IST1_HUMAN	IST1	IST1 homolog				42621.6	38523.3	71001.8
P53992	P53992	SC24C_HUMAN	SEC24C	Protein transport protein Sec24C	190817	169261	195673	114220	144433	121054
P54105	P54105	ICLN_HUMAN	CLNS1A	Methylosome subunit pICln	21024	40529.4	16416.4	182277	130637	134470
P54136	P54136;P54136-2	SYRC_HUMAN	RARS1	Arginine--tRNA ligase, cytoplasmic	63329.7	76871	64577.3	245683	237255	273468
P54252;P54252-1;P54252-4	P54252;P54252-1;P54252-3;P54252-4;P54252-5	ATX3_HUMAN	ATXN3	Ataxin-3	301072	343992	389160	33108.9	53964.6	63159.9
P54577	P54577	SYYC_HUMAN	YARS1	Tyrosine--tRNA ligase, cytoplasmic	148105	182631	171078	401088	442233	558819
P54578;P54578-2	P54578;P54578-2;P54578-3	UBP14_HUMAN	USP14	Ubiquitin carboxyl-terminal hydrolase 14	2237570	2339720	2600610	119612	114338	148875
P54725;P54725-2;P54725-3	P54725;P54725-2;P54725-3	RD23A_HUMAN	RAD23A	UV excision repair protein RAD23 homolog A	211807	202215	167092	206042	206019	140463
P54727	P54725;P54727;P54725-2;P54725-3	RD23B_HUMAN	RAD23B	UV excision repair protein RAD23 homolog B	213925	271885	176857	367298	372417	277477
P54802	P54802	ANAG_HUMAN	NAGLU	Alpha-N-acetylglucosaminidase	43493.6	41466.6	52873.8	127107	108927	77053.6
P54886;P54886-2	P54886;P54886-2	P5CS_HUMAN	ALDH18A1	Delta-1-pyrroline-5-carboxylate synthase	372419	386278	370886	280135	313110	492092
P54920	P54920	SNAA_HUMAN	NAPA	Alpha-soluble NSF attachment protein				175579	171058	190424
P55010	P55010	IF5_HUMAN	EIF5	Eukaryotic translation initiation factor 5				77958.9	80853.1	137166
P55036;P55036-2	P55036;P55036-2	PSMD4_HUMAN	PSMD4	26S proteasome non-ATPase regulatory subunit 4	68974.5	42959	44623.6	129012	101960	123373
P55039	P55039	DRG2_HUMAN	DRG2	Developmentally-regulated GTP-binding protein 2	28533.5	25799.9	37950.4	28341.3	34450.6	27814.8
P55060;P55060-3	P55060;P55060-3;P55060-4	XPO2_HUMAN	CSE1L	Exportin-2	59158.8	89037.1	70649.1	506756	534751	826689
P55072	P55072	TERA_HUMAN	VCP	Transitional endoplasmic reticulum ATPase	399880	477786	467523	1074060	993595	765603
P55084;P55084-2	P55084;P55084-2	ECHB_HUMAN	HADHB	Trifunctional enzyme subunit beta, mitochondrial	133310	164885	154738	95775.7	101744	85534.6
P55145	P55145	MANF_HUMAN	MANF	Mesencephalic astrocyte-derived neurotrophic factor	94514.1	72041.1	73928.4
P55209;P55209-2;P55209-3	P55209;P55209-2;P55209-3	NP1L1_HUMAN	NAP1L1	Nucleosome assembly protein 1-like 1	241591	278236	257595	344727	336052	279779
P55212;P55212-2	P55212;P55212-2	CASP6_HUMAN	CASP6	Caspase-6	103547	83113.5	118533	68127.4	78735.5	57352.9
P55263;P55263-2;P55263-3	P55263;P55263-2;P55263-3;P55263-4	ADK_HUMAN	ADK	Adenosine kinase	167463	176052	163743	69379.5	66912.6	53097.1
P55265;P55265-2;P55265-3;P55265-4;P55265-5	P55265;P55265-2;P55265-3;P55265-4;P55265-5	DSRAD_HUMAN	ADAR	Double-stranded RNA-specific adenosine deaminase	147021	165054	153592	251740	208618	234414
P55735;P55735-2;P55735-3;P55735-4	P55735;P55735-3;P55735-2;P55735-4	SEC13_HUMAN	SEC13	Protein SEC13 homolog	328100	291127	243775	175764	161175	166050
P55786	P55786;P55786-2	PSA_HUMAN	NPEPPS	Puromycin-sensitive aminopeptidase	341639	391428	389281	455987	450556	434618
P55795	P55795	HNRH2_HUMAN	HNRNPH2	Heterogeneous nuclear ribonucleoprotein H2	168106	233657	180710	342413	318080	319983
P55809	P55809	SCOT1_HUMAN	OXCT1	Succinyl-CoA:3-ketoacid coenzyme A transferase 1, mitochondrial	34950.7	44276.1	50129.5	59577.9	71759.6	57819.2
P55884;P55884-2	P55884;P55884-2	EIF3B_HUMAN	EIF3B	Eukaryotic translation initiation factor 3 subunit B	358991	314356	362258	411280	430209	334456
P56192	P56192;P56192-2	SYMC_HUMAN	MARS1	Methionine--tRNA ligase, cytoplasmic	166346	177763	183253	294503	274713	313474
P56270;P56270-2;P56270-3;Q14119;Q9HBE1;Q9HBE1-2;Q9HBE1-3;Q9HBE1-4	P56270;Q14119;Q9HBE1;Q9HBE1-4;P56270-2;P56270-3;Q9HBE1-2;Q9HBE1-3	MAZ_HUMAN;PATZ1_HUMAN;VEZF1_HUMAN	MAZ;PATZ1;VEZF1	Myc-associated zinc finger protein	54593.8	50521.8	44587.4	86574.6	86553.1	159390
P56537	P56537	IF6_HUMAN	EIF6	Eukaryotic translation initiation factor 6	134452	96224.2	83094	143971	142602	128352
P56545;P56545-2;P56545-3	P56545;P56545-3;Q13363;Q13363-2;P56545-2	CTBP2_HUMAN	CTBP2	C-terminal-binding protein 2	120045	117148	113715	78721.4	101934	121245
P57081;P57081-2	P57081;P57081-2	WDR4_HUMAN	WDR4	tRNA (guanine-N(7)-)-methyltransferase non-catalytic subunit WDR4	47713.3	41730.1	41963.8		12273.9
P57735	P57735	RAB25_HUMAN	RAB25	Ras-related protein Rab-25	77514.6	75241.2	99994	54521.1	68603.4	33895.5
P57737;P57737-2;P57737-3;P57737-4	P57737;P57737-2;P57737-3;P57737-4	CORO7_HUMAN	CORO7	Coronin-7	66524.5	71297.2	64620.1	42584.2	40533.2	60822
P58107	P58107	EPIPL_HUMAN	EPPK1	Epiplakin	93683.9	106874	75576.2	182246	192343	316331
P58546	P58546	MTPN_HUMAN	MTPN	Myotrophin		18632.2		65180.1	74497.3	78989.8
P59998;P59998-2;P59998-3	P59998;P59998-2;P59998-3	ARPC4_HUMAN	ARPC4	Actin-related protein 2/3 complex subunit 4	108021	128342	207812	111331	152023	79964.1
P60174;P60174-3	P60174;P60174-3;P60174-4	TPIS_HUMAN	TPI1	Triosephosphate isomerase	271578	526990	279795	671471	654620	462289
P60201	P60201;P60201-2	MYPR_HUMAN	PLP1	Myelin proteolipid protein	118588	119200	103130	142062	142959	139141
P60228	P60228	EIF3E_HUMAN	EIF3E	Eukaryotic translation initiation factor 3 subunit E	71076.3	76539.4	79303.8	271024	276456	227667
P60510	P60510	PP4C_HUMAN	PPP4C	Serine/threonine-protein phosphatase 4 catalytic subunit	181320	185250	177192	108358	122874	92378.9
P60520	P60520	GBRL2_HUMAN	GABARAPL2	Gamma-aminobutyric acid receptor-associated protein-like 2		12358.7		14070.2		20491.4
P60660;P60660-2	P60660;P60660-2	MYL6_HUMAN	MYL6	Myosin light polypeptide 6	170817	178870	151792	572102	521862	634053
P60709;P63261	P60709;P63261	ACTB_HUMAN;ACTG_HUMAN	ACTB;ACTG1	Actin, cytoplasmic 1	28990400	29236100	27206800	22828800	22665100	19679800
P60842	P60842;Q14240;Q14240-2	IF4A1_HUMAN	EIF4A1	Eukaryotic initiation factor 4A-I	966030	923389	1100390	1455520	1570510	1378150
P60866;P60866-2	P60866;P60866-2	RS20_HUMAN	RPS20	Small ribosomal subunit protein uS10	268948	264363	271555	273196	282982	234258
P60891	P60891;P60891-2	PRPS1_HUMAN	PRPS1	Ribose-phosphate pyrophosphokinase 1	261343	403018	319452	645321	596956	529885
P60900	P60900;P60900-2;P60900-3	PSA6_HUMAN	PSMA6	Proteasome subunit alpha type-6	517193	475819	519471	410432	458105	293285
P60953	P60953;P60953-1	CDC42_HUMAN	CDC42	Cell division control protein 42 homolog	211973	200119	158168	145307	131234	163013
P60981;P60981-2	P60981;P60981-2	DEST_HUMAN	DSTN	Destrin	134595	137912	106892	367433	345612	368149
P60983	P60983	GMFB_HUMAN	GMFB	Glia maturation factor beta	57748.3	59061.6	42464.4	114541	100638	104787
P61006	P61006;P61006-2	RAB8A_HUMAN	RAB8A	Ras-related protein Rab-8A	104323	87410.2	97051.6	52917.7	60651.3	49624.6
P61009	P61009	SPCS3_HUMAN	SPCS3	Signal peptidase complex subunit 3	80376.6	64989.2	56231.3	36001.3	34980.4	40577.7
P61011;P61011-2	P61011;P61011-2	SRP54_HUMAN	SRP54	Signal recognition particle subunit SRP54				146615	126695	165413
P61019	P61019;Q8WUD1	RAB2A_HUMAN	RAB2A	Ras-related protein Rab-2A	277434	262005	328327	225793	251792	190815
P61020;P61020-2	P61020;P61020-2	RAB5B_HUMAN	RAB5B	Ras-related protein Rab-5B	112333	103703	94662.2		34434.9	63041.5
P61026	P61026	RAB10_HUMAN	RAB10	Ras-related protein Rab-10	586668	555922	581331	369417	365757	403572
P61077;P61077-2;P61077-3;P62837;P62837-2	P61077;P62837;P62837-2;P61077-2;P61077-3	UB2D2_HUMAN;UB2D3_HUMAN	UBE2D2;UBE2D3	Ubiquitin-conjugating enzyme E2 D3	218930	245861	249786	289546	278489	294917
P61081	P61081	UBC12_HUMAN	UBE2M	NEDD8-conjugating enzyme Ubc12	89204.2	122218	105866	294809	265184	447991
P61086	P61086;P61086-3	UBE2K_HUMAN	UBE2K	Ubiquitin-conjugating enzyme E2 K	225334	107003	238074	172444	191853	265923
P61088	P61088	UBE2N_HUMAN	UBE2N	Ubiquitin-conjugating enzyme E2 N	497247	649900	608703	619557	591359	790515
P61106	P61106	RAB14_HUMAN	RAB14	Ras-related protein Rab-14	253092	232215	241724	160534	186772	148257
P61158	P61158	ARP3_HUMAN	ACTR3	Actin-related protein 3	1386590	1323120	1362340	879557	1053710	564881
P61160;P61160-2	P61160;P61160-2	ARP2_HUMAN	ACTR2	Actin-related protein 2	855181	872759	810364	690930	670363	513412
P61163	P42025;P61163	ACTZ_HUMAN	ACTR1A	Alpha-centractin	234409	209219	218332	144969	186100	160487
P61201;P61201-2	P61201;P61201-2	CSN2_HUMAN	COPS2	COP9 signalosome complex subunit 2	81823.5	100301	85675.8	359915	355318	327262
P61204;P84077	P61204;P84077	ARF1_HUMAN;ARF3_HUMAN	ARF1;ARF3	ADP-ribosylation factor 3	1071110	1143630	1200660	980988	959559	779265
P61221	P61221	ABCE1_HUMAN	ABCE1	ATP-binding cassette sub-family E member 1	114543	146331	142954	136526	131659	102527
P61224;P61224-2;P61224-3;P62834	P61224;P62834;P61224-2;P61224-3	RAP1A_HUMAN;RAP1B_HUMAN	RAP1A;RAP1B	Ras-related protein Rap-1b	277314	277293	278283	163090	176767	122153
P61247	P61247	RS3A_HUMAN	RPS3A	Small ribosomal subunit protein eS1	620564	626661	597268	728553	618270	441542
P61254	P61254;Q9UNX3	RL26_HUMAN	RPL26	Large ribosomal subunit protein uL24	260954	270421	310110	226084	227960	197880
P61289;P61289-2;P61289-3	P61289;P61289-2;P61289-3	PSME3_HUMAN	PSME3	Proteasome activator complex subunit 3	73325.6	58894.4	73719	172909	188001	181707
P61313	P61313;P61313-2	RL15_HUMAN	RPL15	Large ribosomal subunit protein eL15	153264	174062	157093	140039	97609.2	87861.5
P61326;P61326-2;Q96A72	P61326;Q96A72;P61326-2	MGN2_HUMAN;MGN_HUMAN	MAGOH;MAGOHB	Protein mago nashi homolog	128681	139618	188714	183958	315418	131968
P61353	P61353	RL27_HUMAN	RPL27	Large ribosomal subunit protein eL27	723904	725272	1017000	624846	794754	482469
P61421	P61421	VA0D1_HUMAN	ATP6V0D1	V-type proton ATPase subunit d 1	15689.1	11156	6959.64	25295.1	21422.5	18267.7
P61457	P61457	PHS_HUMAN	PCBD1	Pterin-4-alpha-carbinolamine dehydratase	6690.55	8191.75		10459.7	7961.65	7250.43
P61513	P61513	RL37A_HUMAN	RPL37A	Large ribosomal subunit protein eL43	888128	682748	665188	1269980	910106	1147170
P61586	P08134;P61586;P62745	RHOA_HUMAN	RHOA	Transforming protein RhoA	370180	378349	388690	345685	299896	281722
P61604	P61604	CH10_HUMAN	HSPE1	10 kDa heat shock protein, mitochondrial	78461	159041	83064.3	102067	73275.4	53641.9
P61758	P61758;P61758-2	PFD3_HUMAN	VBP1	Prefoldin subunit 3	33595.8	49889.1	50057.6	115133	108247	98452.4
P61769	P61769	B2MG_HUMAN	B2M	Beta-2-microglobulin	21078.4	18588.5	20782.2
P61923;P61923-4;P61923-5	P61923;P61923-4;P61923-5	COPZ1_HUMAN	COPZ1	Coatomer subunit zeta-1			17505.3	45550.5	45431.2	103878
P61956;P61956-2	P55854;P61956;Q6EEV6;P55854-2;P61956-2	SUMO2_HUMAN	SUMO2	Small ubiquitin-related modifier 2	90175.6	109226	89626.7	105364	97275	76563.5
P61962	P61962	DCAF7_HUMAN	DCAF7	DDB1- and CUL4-associated factor 7	675295	581705	635131	316215	297142	303338
P61964	P61964	WDR5_HUMAN	WDR5	WD repeat-containing protein 5	73368.3	61499.9	63769.8	69689.4	82723.3	79056.2
P61966	P61966;P61966-2	AP1S1_HUMAN	AP1S1	AP-1 complex subunit sigma-1A	74665.8	48006.1	66054.2	103545	145246	98323.3
P61970	P61970	NTF2_HUMAN	NUTF2	Nuclear transport factor 2	156125	173392	158667	195557	193801	155986
P61978;P61978-2;P61978-3	P61978;P61978-2;P61978-3	HNRPK_HUMAN	HNRNPK	Heterogeneous nuclear ribonucleoprotein K	233025	308903	192869	2554230	2355280	2346160
P61981	P61981	1433G_HUMAN	YWHAG	14-3-3 protein gamma	98484.5	131387	111409	287192	284011	230523
P62068;P62068-3;P62068-4	P62068;P62068-2;P62068-3;P62068-4	UBP46_HUMAN	USP46	Ubiquitin carboxyl-terminal hydrolase 46	289107	282807	350589
P62081	P62081	RS7_HUMAN	RPS7	Small ribosomal subunit protein eS7	330848	331469	421750	420696	453018	335762
P62136	P36873;P62136;P62140;P36873-2;P62136-2;P62136-3	PP1A_HUMAN	PPP1CA	Serine/threonine-protein phosphatase PP1-alpha catalytic subunit	336215	319748	344366	295420	261731	266771
P62191	P62191;P62191-2	PRS4_HUMAN	PSMC1	26S proteasome regulatory subunit 4	133367	154360	144639	234325	261070	288231
P62195;P62195-2	P62195;P62195-2	PRS8_HUMAN	PSMC5	26S proteasome regulatory subunit 8	132740	148973	174647	241665	229289	238298
P62241	P62241	RS8_HUMAN	RPS8	Small ribosomal subunit protein eS8	566541	643093	634169	497865	558927	373138
P62244	P62244	RS15A_HUMAN	RPS15A	Small ribosomal subunit protein uS8	598676	607397	664117	529139	577041	430176
P62249	P62249	RS16_HUMAN	RPS16	Small ribosomal subunit protein uS9	172209	187050	250971	319787	419278	223016
P62253	P62253	UB2G1_HUMAN	UBE2G1	Ubiquitin-conjugating enzyme E2 G1	38536.3		30308.7	72256.9	58776.7	56179.6
P62258-2	P62258;P62258-2	1433E_HUMAN	YWHAE	Isoform SV of 14-3-3 protein epsilon	350072	533780	448867	1183750	1353580	867401
P62263	P62263	RS14_HUMAN	RPS14	Small ribosomal subunit protein uS11	800223	742632	666232	380713	454360	348705
P62266	P62266	RS23_HUMAN	RPS23	Small ribosomal subunit protein uS12	579001	642472	739575	322428	314190	259642
P62269	P62269	RS18_HUMAN	RPS18	Small ribosomal subunit protein uS13	566788	536147	583913	735313	679364	467085
P62273;P62273-2	P62273;P62273-2	RS29_HUMAN	RPS29	Small ribosomal subunit protein uS14	52033.6	52983.6	35489	98104.2	75981.8	58261.2
P62277	P62277	RS13_HUMAN	RPS13	Small ribosomal subunit protein uS15	781847	907553	960234	1024570	1040810	731419
P62280	P62280	RS11_HUMAN	RPS11	Small ribosomal subunit protein uS17	415968	389866	445855	267158	268520	228306
P62306	P62306	RUXF_HUMAN	SNRPF	Small nuclear ribonucleoprotein F	67455.9	59013.6	100245	62457.2	104786	46206.9
P62314	P62314	SMD1_HUMAN	SNRPD1	Small nuclear ribonucleoprotein Sm D1	64088.9	62569.5	68315	53641.6	55969.6	41037.1
P62316;P62316-2	P62316;P62316-2	SMD2_HUMAN	SNRPD2	Small nuclear ribonucleoprotein Sm D2	65721.2	78596.9	77096.8	126457	113759	134244
P62318;P62318-2	P62318;P62318-2	SMD3_HUMAN	SNRPD3	Small nuclear ribonucleoprotein Sm D3	52932.7	48265.5	68946.7	91336.1	107544	69574.5
P62330	P62330	ARF6_HUMAN	ARF6	ADP-ribosylation factor 6	199006	218442	369161	237693	301259	459834
P62333	P62333	PRS10_HUMAN	PSMC6	26S proteasome regulatory subunit 10B	133592	126647	124855	248307	234758	284319
P62424	P62424	RL7A_HUMAN	RPL7A	Large ribosomal subunit protein eL8	97971	106419	107453	119634	104519	81803.7
P62487	P62487	RPB7_HUMAN	POLR2G	DNA-directed RNA polymerase II subunit RPB7	14798.1	15534.8	17574.2	29524.8	24576.6	18872.5
P62491;P62491-2;Q15907;Q15907-2	P62491;Q15907;P62491-2;Q15907-2	RB11A_HUMAN;RB11B_HUMAN	RAB11A;RAB11B	Ras-related protein Rab-11A	299256	312041	304464	184445	198938	138806
P62495;P62495-2	P62495;P62495-2	ERF1_HUMAN	ETF1	Eukaryotic peptide chain release factor subunit 1	118369	129205	110573	195069	245639	220329
P62701	P62701;Q8TD47	RS4X_HUMAN	RPS4X	Small ribosomal subunit protein eS4, X isoform	336891	384570	384648	422573	431053	358528
P62714;P67775	P62714;P67775;P67775-2	PP2AA_HUMAN;PP2AB_HUMAN	PPP2CA;PPP2CB	Serine/threonine-protein phosphatase 2A catalytic subunit beta isoform	508726	524647	508930	458588	453431	353120
P62736	P62736;P63267;P68032;P68133	ACTA_HUMAN	ACTA2	Actin, aortic smooth muscle	3245730	3222320	3119060	2612920	2419540	1838810
P62750	P62750	RL23A_HUMAN	RPL23A	Large ribosomal subunit protein uL23	246385	232320	254433	308572	302725	243005
P62753	P62753	RS6_HUMAN	RPS6	Small ribosomal subunit protein eS6	171269	168856	202966	176850	145757	107864
P62805	P62805	H4_HUMAN	H4C1	Histone H4	644654	616324	703269	1232980	1130100	856868
P62820	P62820;Q9H0U4;P62820-2	RAB1A_HUMAN	RAB1A	Ras-related protein Rab-1A	617589	644694	704586	461567	443112	417327
P62826	P62826	RAN_HUMAN	RAN	GTP-binding nuclear protein Ran	3106050	2829490	3183660	2447590	2860490	1784100
P62829	P62829	RL23_HUMAN	RPL23	Large ribosomal subunit protein uL14	678227	701529	774696	627637	614740	443649
P62841	P62841	RS15_HUMAN	RPS15	Small ribosomal subunit protein uS19	94369.7	81993.3	72501	121969	97322.2	53446.9
P62847;P62847-2;P62847-3;P62847-4	P62847;P62847-2;P62847-3;P62847-4	RS24_HUMAN	RPS24	Small ribosomal subunit protein eS24	73217.4	72595.9	75593.2	39385.7	66787.6	26409.5
P62851	P62851	RS25_HUMAN	RPS25	Small ribosomal subunit protein eS25	117595	122127	146046	198604	165946	131905
P62854;Q5JNZ5	P62854;Q5JNZ5	RS26L_HUMAN;RS26_HUMAN	RPS26;RPS26P11	Small ribosomal subunit protein eS26	179061	194629	185349	172093	223434	137095
P62857	P62857	RS28_HUMAN	RPS28	Small ribosomal subunit protein eS28	54255.9	109474	82760.5	367223	340008	355382
P62861	P62861	RS30_HUMAN	FAU	Ubiquitin-like FUBI-ribosomal protein eS30 fusion protein	58522	78945.8	84778.8	104497	86205.8	84077.9
P62879	P16520;P62873;P62879;P16520-2;P62873-2	GBB2_HUMAN	GNB2	Guanine nucleotide-binding protein G(I)/G(S)/G(T) subunit beta-2	1545450	1381340	1683350	536118	744397	603975
P62888	P62888	RL30_HUMAN	RPL30	Large ribosomal subunit protein eL30	96261.2	96829.9	110492	75850.3	88278.7	80813.3
P62899;P62899-2;P62899-3	P62899;P62899-2;P62899-3	RL31_HUMAN	RPL31	Large ribosomal subunit protein eL31	379855	371874	433174	378850	383111	251106
P62906	P62906	RL10A_HUMAN	RPL10A	Large ribosomal subunit protein uL1	197328	219960	217169	231329	227236	196713
P62910	P62910	RL32_HUMAN	RPL32	Large ribosomal subunit protein eL32	57856.2	38772.8	54969.5	67431.5	117617	42490
P62913;P62913-2	P62913;P62913-2	RL11_HUMAN	RPL11	Large ribosomal subunit protein uL5	556668	551216	591248	369077	379629	241744
P62917	P62917	RL8_HUMAN	RPL8	Large ribosomal subunit protein uL2	846550	822416	879818	833550	713158	575348
P62937	P62937	PPIA_HUMAN	PPIA	Peptidyl-prolyl cis-trans isomerase A	1305250	2053340	1472910	3097400	2840440	2543540
P62942	P62942	FKB1A_HUMAN	FKBP1A	Peptidyl-prolyl cis-trans isomerase FKBP1A	2402800	1800580	1443160	3334370	2880600	2408830
P62993	P62993;P62993-2	GRB2_HUMAN	GRB2	Growth factor receptor-bound protein 2	77815.8	95446	84374.4	145489	138254	102377
P62995;P62995-3	P62995;P62995-3	TRA2B_HUMAN	TRA2B	Transformer-2 protein homolog beta	151794	197900	165504	310437	314148	175633
P63010;P63010-2	P63010;P63010-2;P63010-3	AP2B1_HUMAN	AP2B1	AP-2 complex subunit beta	114904	137953	124699	237555	254318	252072
P63092;P63092-4;Q5JWF2	P63092;Q5JWF2;P63092-2;P63092-3;P63092-4;Q5JWF2-2	GNAS1_HUMAN;GNAS2_HUMAN	GNAS	Guanine nucleotide-binding protein G(s) subunit alpha isoforms short	79251.1	92966.6	79174.8	123904	143616	157018
P63104	P63104;P63104-2	1433Z_HUMAN	YWHAZ	14-3-3 protein zeta/delta	326525	528738	338556	897591	926367	821832
P63151;P63151-2	P63151;P63151-2	2ABA_HUMAN	PPP2R2A	Serine/threonine-protein phosphatase 2A 55 kDa regulatory subunit B alpha isoform	378200	330457	356438	329245	332065	270959
P63165	G2XKQ0;P63165	SUMO1_HUMAN	SUMO1	Small ubiquitin-related modifier 1	1572960	1476480	1668740	1635720	2439630	1387040
P63167	P63167;Q96FJ2	DYL1_HUMAN	DYNLL1	Dynein light chain 1, cytoplasmic	167281	115573	190334	513074	486298	572114
P63208	P63208;P63208-2	SKP1_HUMAN	SKP1	S-phase kinase-associated protein 1		51596.4		94699.5	99734.4	66808.5
P63241;P63241-2	P63241;Q9GZV4;Q6IS14;P63241-2	IF5A1_HUMAN	EIF5A	Eukaryotic translation initiation factor 5A-1	900437	1046360	897813	2886950	2866880	3008360
P63244	P63244	RACK1_HUMAN	RACK1	Small ribosomal subunit protein RACK1	1262180	1107830	1201360	1218340	1218880	894440
P63272	P63272	SPT4H_HUMAN	SUPT4H1	Transcription elongation factor SPT4				16262.2		18354.4
P63279	P63279	UBC9_HUMAN	UBE2I	SUMO-conjugating enzyme UBC9	84907.6	130959	90718	606638	486298	629210
P67809	P16989;P67809;Q9Y2T7;P16989-2;P16989-3	YBOX1_HUMAN	YBX1	Y-box-binding protein 1	906596	997084	1064440	1150090	1141480	841803
P67812;P67812-2;P67812-3;P67812-4	P67812;P67812-2;P67812-3;P67812-4	SC11A_HUMAN	SEC11A	Signal peptidase complex catalytic subunit SEC11A	98950.3	105560	117096	81974.1	76526.2	69424.8
P67870	P67870	CSK2B_HUMAN	CSNK2B	Casein kinase II subunit beta	222281	263877	209100	116721	99925	112220
P67936	P07951;P67936;P07951-2;P07951-3;P67936-2	TPM4_HUMAN	TPM4	Tropomyosin alpha-4 chain	155919	315920	162870	330814	323647	289916
P68036;P68036-2;P68036-3	P68036;A0A1B0GUS4;P68036-2;P68036-3	UB2L3_HUMAN	UBE2L3	Ubiquitin-conjugating enzyme E2 L3	43052.6	106024	58740.4	225512	186194	185967
P68104;Q5VTE0	P68104;Q5VTE0	EF1A1_HUMAN;EF1A3_HUMAN	EEF1A1;EEF1A1P5	Elongation factor 1-alpha 1	1866950	1802500	2184560	3045120	3405880	4104730
P68366;P68366-2	P0DPH7;P0DPH8;P68363;P68366;Q6PEY2;Q71U36;Q9BQE3;Q9NY65;P0DPH7-2;P68363-2;P68366-2;Q71U36-2;Q9NY65-2	TBA4A_HUMAN	TUBA4A	Tubulin alpha-4A chain	10087800	9134870	9259640	9775470	9476240	12700300
P68371	P68371	TBB4B_HUMAN	TUBB4B	Tubulin beta-4B chain	2475370	2511010	2465130	2449580	1854960	3089250
P68400;Q8NEV1	P68400;Q8NEV1	CSK21_HUMAN;CSK23_HUMAN	CSNK2A1;CSNK2A3	Casein kinase II subunit alpha	285223	296399	273547	171818	170563	132049
P68402	P68402	PA1B2_HUMAN	PAFAH1B2	Platelet-activating factor acetylhydrolase IB subunit alpha2	228942	206334	192620	566084	518399	555118
P68431;P84243;Q16695;Q71DI3	P68431;P84243;Q16695;Q71DI3	H31T_HUMAN;H31_HUMAN;H32_HUMAN;H33_HUMAN	H3-3A;H3-4;H3C1;H3C15	Histone H3.1	147322	140403	154406	336750	313198	227819
P68871	P02042;P68871	HBB_HUMAN	HBB	Hemoglobin subunit beta	45135.8	39542.9	59823.1	727066	102904	69117.4
P69905	P69905	HBA_HUMAN	HBA1	Hemoglobin subunit alpha				97999.3	14411	7469.03
P78330	P78330	SERB_HUMAN	PSPH	Phosphoserine phosphatase			41094.9	65965.8	79653.3	62595.9
P78344;P78344-2	P78344;P78344-2	IF4G2_HUMAN	EIF4G2	Eukaryotic translation initiation factor 4 gamma 2		8922.26	19441.2	80434	85319.8	183620
P78346;P78346-2	P78346;P78346-2	RPP30_HUMAN	RPP30	Ribonuclease P protein subunit p30	20956.8	21425.1	21890
P78347;P78347-2;P78347-3;P78347-4	P78347;P78347-2;P78347-3;P78347-4	GTF2I_HUMAN	GTF2I	General transcription factor II-I	375296	411987	350459	263052	239127	347927
P78356	P48426;P78356;P78356-2;P48426-2	PI42B_HUMAN	PIP4K2B	Phosphatidylinositol 5-phosphate 4-kinase type-2 beta	67401.8	69189	70171.4	64383.2	53572	53624.1
P78362;P78362-2	P78362;P78362-2	SRPK2_HUMAN	SRPK2	SRSF protein kinase 2	10455.8		6531.73	27639.7	22666.2	15589.5
P78371	P78371;P78371-2	TCPB_HUMAN	CCT2	T-complex protein 1 subunit beta	829545	923648	795964	1881210	1905880	2208910
P78406	P78406	RAE1L_HUMAN	RAE1	mRNA export factor RAE1	132228	106268	107579	101105	114688	157171
P78417;P78417-3	P78417;P78417-3	GSTO1_HUMAN	GSTO1	Glutathione S-transferase omega-1	31065.3	60920.5	49103.1	147187	149229	89606.9
P78527	P78527;P78527-2	PRKDC_HUMAN	PRKDC	DNA-dependent protein kinase catalytic subunit	10590.4	27942.8	15746.8	46296.5	30466.2	55096.3
P80404	P80404	GABT_HUMAN	ABAT	4-aminobutyrate aminotransferase, mitochondrial	158984	202266	152751	170546	158489	152242
P81605;P81605-2	P81605;P81605-2	DCD_HUMAN	DCD	Dermcidin	65691.5	67263.6	44859.4	139015	87740.6	78426.8
P82650	P82650;P82650-2	RT22_HUMAN	MRPS22	Small ribosomal subunit protein mS22		13727.5		40931.3	40881.9	25869.4
P82675	P82675	RT05_HUMAN	MRPS5	Small ribosomal subunit protein uS5m	42733.7	38407.6	44945.6	26737.8	33353.1	32545.2
P82912;P82912-2;P82912-3	P82912;P82912-2;P82912-3	RT11_HUMAN	MRPS11	Small ribosomal subunit protein uS11m	14595.8	33973.8	45721.8		25432.2	33353.3
P82930	P82930	RT34_HUMAN	MRPS34	Small ribosomal subunit protein mS34	31678.5	35589.6	37466.6	43733.5	36368.7	20996.9
P83731	P83731	RL24_HUMAN	RPL24	Large ribosomal subunit protein eL24	234538	228308	229475	141091	151083	124760
P83881	P83881;Q969Q0	RL36A_HUMAN	RPL36A	Large ribosomal subunit protein eL42	269834	270012	318334	161218	189532	134793
P84085	P84085	ARF5_HUMAN	ARF5	ADP-ribosylation factor 5	1431460	1235200	1270780	795955	903031	948569
P84090	P84090	ERH_HUMAN	ERH	Enhancer of rudimentary homolog	59967.3	85716.4	75873.5	62771.9	63900.1	58729.6
P84098	P84098	RL19_HUMAN	RPL19	Large ribosomal subunit protein eL19	123479	135497	142240	141581	121508	98366
P84103;P84103-2	P84103;P84103-2	SRSF3_HUMAN	SRSF3	Serine/arginine-rich splicing factor 3	263820	282592	381850	409472	375329	383707
P98179	P98179	RBM3_HUMAN	RBM3	RNA-binding protein 3	66541.4	69973.7	74370.7	71063.8	66895.3	59523.7
P99999	P99999	CYC_HUMAN	CYCS	Cytochrome c	78104.2	91165.6	63666.1	87609.4	64586	51656.2
Q00325;Q00325-2	Q00325;Q00325-2	S25A3_HUMAN	SLC25A3	Solute carrier family 25 member 3	38613	36677.6	57422.2	31059.7	47573	43481.1
Q00341	Q00341;Q00341-2	VIGLN_HUMAN	HDLBP	Vigilin	43353	51884.7	35905	195406	183756	303912
Q00535	Q00535	CDK5_HUMAN	CDK5	Cyclin-dependent kinase 5	17249.7	31971.3	25492.3	17105	12243.8	26381
Q00577	Q00577	PURA_HUMAN	PURA	Transcriptional activator protein Pur-alpha	38194.5	38105.2	37655.6	117176	118780	119666
Q00610;Q00610-2	P53675;Q00610;P53675-2;Q00610-2	CLH1_HUMAN	CLTC	Clathrin heavy chain 1	1162080	1126340	1170780	1925880	2044450	2092130
Q00613;Q00613-2	Q00613;Q00613-2	HSF1_HUMAN	HSF1	Heat shock factor protein 1	43605	33669.8	25171.4	40103.4	33426.3	53345.8
Q00688	Q00688	FKBP3_HUMAN	FKBP3	Peptidyl-prolyl cis-trans isomerase FKBP3		54021.3		145086	120661	110984
Q00796	Q00796	DHSO_HUMAN	SORD	Sorbitol dehydrogenase	116917	98607.2	119088	54547.9	37576.4	51011.8
Q00839	Q00839;Q00839-2	HNRPU_HUMAN	HNRNPU	Heterogeneous nuclear ribonucleoprotein U	2554810	2416540	2291370	2867470	2367430	2148990
Q01081;Q01081-2;Q01081-4	Q01081;Q01081-2;Q01081-4	U2AF1_HUMAN	U2AF1	Splicing factor U2AF 35 kDa subunit	53919	62205.9	82399.9	60723.9	68287.4	41752.1
Q01082;Q01082-2;Q01082-3	Q01082;Q01082-2;Q01082-3	SPTB2_HUMAN	SPTBN1	Spectrin beta chain, non-erythrocytic 1	43725.7	43205.8	53517.4	142089	153810	216537
Q01085;Q01085-2	Q01085;Q01085-2	TIAR_HUMAN	TIAL1	Nucleolysin TIAR	29738.7	46277.2	33203.6	87461.5	98813.9	97057.2
Q01105-2	P0DME0;Q01105;Q01105-2;Q01105-3;Q01105-4	SET_HUMAN	SET	Isoform 2 of Protein SET	277687	443412	348073	299129	250475	191049
Q01130;Q01130-2;Q9BRL6;Q9BRL6-2	Q01130;Q9BRL6;Q01130-2;Q9BRL6-2	SRSF2_HUMAN;SRSF8_HUMAN	SRSF2;SRSF8	Serine/arginine-rich splicing factor 2	35977.9	43573.4	43871.1	65033.5	63652.8	37542.8
Q01415	Q01415	GALK2_HUMAN	GALK2	N-acetylgalactosamine kinase	9248.96	16676.5	19988.8	14142.4	34493.8	42161
Q01433;Q01433-2;Q01433-3;Q01433-4;Q01433-5	Q01433;Q01433-2;Q01433-3;Q01433-4;Q01433-5	AMPD2_HUMAN	AMPD2	AMP deaminase 2	66895.3	65391.2	77385.2	96562.3	76615.5	63698.9
Q01469	Q01469	FABP5_HUMAN	FABP5	Fatty acid-binding protein 5		42004.3	61139.7	177595	111952	47747.7
Q01518;Q01518-2	P40123;Q01518;P40123-2;P40123-3;Q01518-2	CAP1_HUMAN	CAP1	Adenylyl cyclase-associated protein 1	340766	261345	283862	229268	259512	218837
Q01581	Q01581	HMCS1_HUMAN	HMGCS1	Hydroxymethylglutaryl-CoA synthase, cytoplasmic	68778.3	68143.5	72269.8	55536	45450.2	42434.2
Q01780;Q01780-2	Q01780;Q01780-2	EXOSX_HUMAN	EXOSC10	Exosome component 10	39445.9	22090.1	24462.9		28841.1	27185
Q01804	Q01804;Q01804-3;Q01804-5	OTUD4_HUMAN	OTUD4	OTU domain-containing protein 4	30082.9	24686.3	40319.2		28309.5
Q01813	Q01813;Q01813-2	PFKAP_HUMAN	PFKP	ATP-dependent 6-phosphofructokinase, platelet type	558278	607848	574657	747425	719815	926249
Q01844;Q01844-3;Q01844-5;Q01844-6	Q01844;Q01844-4;Q01844-3;Q01844-5;Q01844-6	EWS_HUMAN	EWSR1	RNA-binding protein EWS	47926.2	50087.5	52298.2	84184.2	79717.4	50051.9
Q01968;Q01968-2	Q01968;Q01968-2	OCRL_HUMAN	OCRL	Inositol polyphosphate 5-phosphatase OCRL	205807	196822	191633	65077.1	53921.3	101971
[truncated: 1,003 more rows]

## Sheet: DIANN_Cocktail_PR619_DUBs
	Protein.Group	Protein.Ids	Protein.Names	Genes	First.Protein.Description	PA/VS/VME DIA 0 [µM] PR619 Rep 1	PA/VS/VME DIA 0 [µM] PR619 Rep 2	PA/VS/VME DIA 0 [µM] PR619 Rep 3	PA/VS/VME DIA 50 [µM] PR619 Rep 1	PA/VS/VME DIA 50 [µM] PR619 Rep 2	PA/VS/VME DIA 50 [µM] PR619 Rep 3
[truncated: 49 more rows]

[truncated: 18 more sheets: FP_PA_PR619, FP_PA_PR619_DUBs, FP_Cocktail_PR619, FP_Cocktail_PR619_DUBs, MaxDIA_PA_PR619 Key, MaxDIA_PA_PR619, MaxDIA_PA_PR619_DUBs, MaxDIA_Cocktail_PR619 Key, MaxDIA_Cocktail_PR619, MaxDIA_Cocktail_PR619_DUBs, MQ_PA_PR619 Key, MQ_PA_PR619, MQ_PA_PR619_DUBs, MQ_Cocktail_PR619 Key, MQ_Cocktail_PR619, MQ_Cocktail_PR619_DUBs, PD_TMT, PD_TMT_DUBS]
